# Supplementary material
Source: PubMed Central journal article supplement (PMC3945317)
Supplement: supp_M113.517904_jbc.M113.517904-12.pdf [file supp_M113.517904_jbc.M113.517904-12.pdf]

# MASCOT SCIENCE Mascot Search Results

## Peptide View

MS/MS Fragmentation of **LAEQAER**

Found in **1433B\_HUMAN**, 14-3-3 protein beta/alpha OS=Homo sapiens GN=YWHAB PE=1 SV=3

Match to Query 14957: 1126.580488 from(564.297520,2+) rtinseconds(1443) index(42521)

Title: Locus:1.1.1.3215.17 File:"2013-07-02 CLN FXIII 180 min 3rd F 4.wiff"

Data file C:\Program Files (x86)\Matrix Science\Mascot Daemon\mgf\9 FXIII 180 min 3rd\mascot\_daemon\_merge.mgf

Click mouse within plot area to zoom in by factor of two about that point

Or, Plot from  to  Da

Label all possible matches  Label matches used for scoring

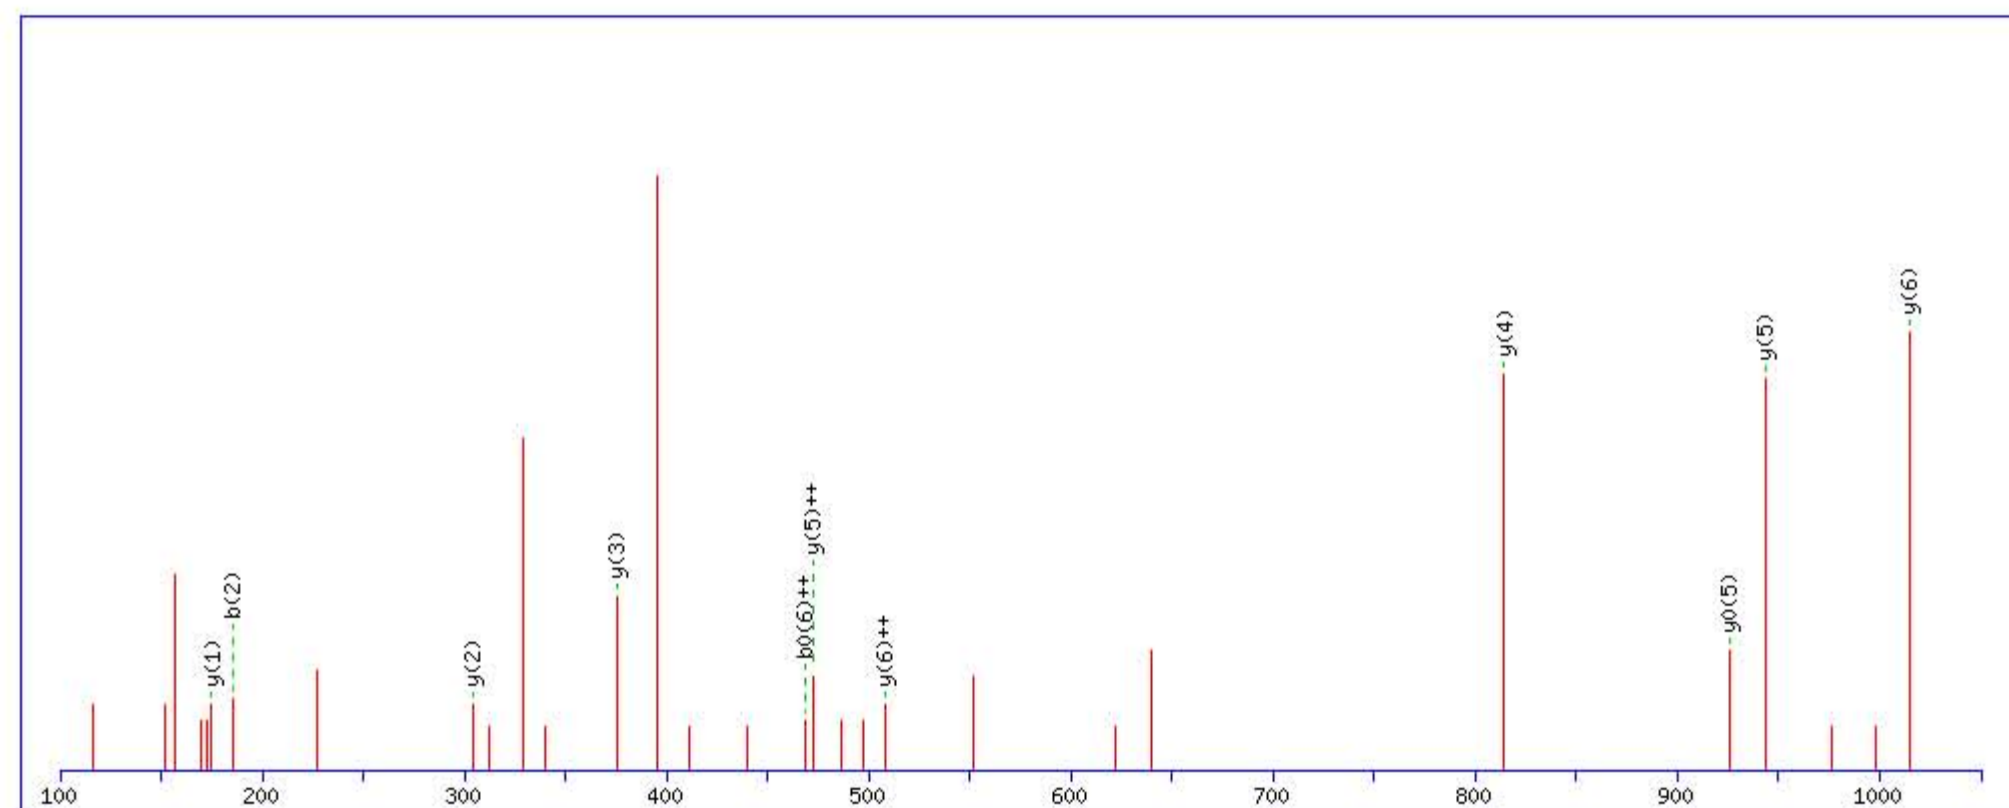

Monoisotopic mass of neutral peptide Mr(calc): 1126.580444

Fixed modifications: Carbamidomethyl (C) (apply to specified residues or termini only)

Variable modifications:

Q4 : Biotin:Thermo-21345 (Q)

Ions Score: 25 Expect: 0.037

Matches : 11/60 fragment ions using 27 most intense peaks [\(help\)](#)

| # | b          | b <sup>++</sup> | b <sup>*</sup> | b <sup>*++</sup> | b <sup>0</sup> | b <sup>0++</sup> | Seq. | y           | y <sup>++</sup> | y <sup>*</sup> | y <sup>*++</sup> | y <sup>0</sup> | y <sup>0++</sup> | # |
|---|------------|-----------------|----------------|------------------|----------------|------------------|------|-------------|-----------------|----------------|------------------|----------------|------------------|---|
| 1 | 114.091340 | 57.549308       |                |                  |                |                  | L    |             |                 |                |                  |                |                  | 7 |
| 2 | 185.128454 | 93.067865       |                |                  |                |                  | A    | 1014.503692 | 507.755484      | 997.477143     | 499.242210       | 996.493127     | 498.750202       | 6 |
| 3 | 314.171047 | 157.589161      |                |                  | 296.160482     | 148.583879       | E    | 943.466578  | 472.236927      | 926.440029     | 463.723653       | 925.456013     | 463.231645       | 5 |
| 4 | 753.396373 | 377.201825      | 736.369824     | 368.688550       | 735.385808     | 368.196542       | Q    | 814.423985  | 407.715631      | 797.397436     | 399.202356       | 796.413420     | 398.710348       | 4 |
| 5 | 824.433487 | 412.720382      | 807.406938     | 404.207107       | 806.422922     | 403.715099       | A    | 375.198659  | 188.102968      | 358.172110     | 179.589693       | 357.188094     | 179.097685       | 3 |
| 6 | 953.476080 | 477.241678      | 936.449531     | 468.728404       | 935.465515     | 468.236396       | E    | 304.161545  | 152.584411      | 287.134996     | 144.071136       | 286.150980     | 143.579128       | 2 |
| 7 |            |                 |                |                  |                |                  | R    | 175.118952  | 88.063114       | 158.092403     | 79.549840        |                |                  | 1 |

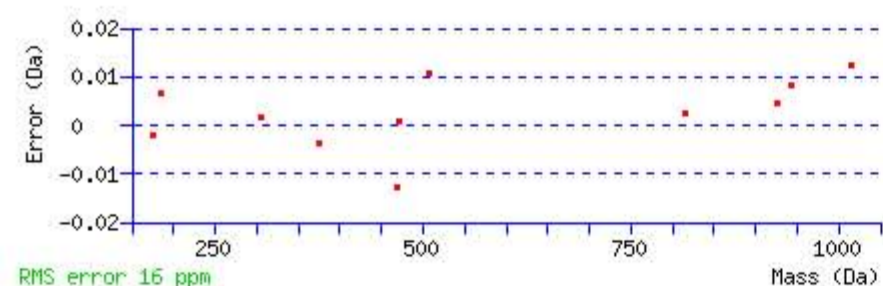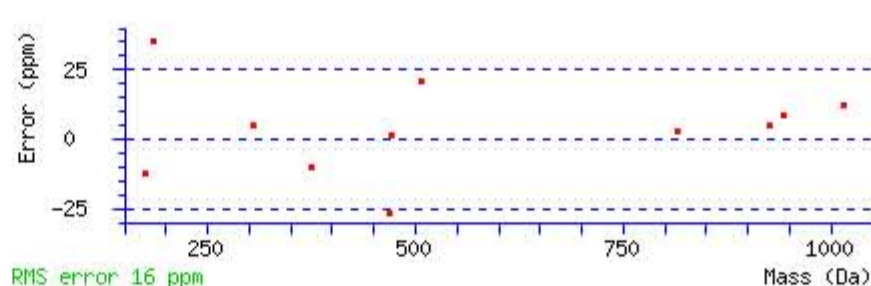

NCBI BLAST search of **LAEQAER**

(Parameters: blastp, nr protein database, expect=20000, no filter, PAM30)

Other BLAST [web gateways](#)

All matches to this query

| Score | Mr(calc):   | Delta    | Sequence                   |
|-------|-------------|----------|----------------------------|
| 25.3  | 1126.580444 | 0.000044 | <a href="#">LAEQAER</a>    |
| 9.5   | 1126.580444 | 0.000044 | <a href="#">LAQAEEER</a>   |
| 0.6   | 1126.573074 | 0.007414 | <a href="#">SPERPTGDLR</a> |

Mascot: <http://www.matrixscience.com/>

# MASCOT Search Results

## Peptide View

MS/MS Fragmentation of **SSPGGASFYHWGAAVPHSQGDALCR**

Found in **ATS13\_HUMAN**, A disintegrin and metalloproteinase with thrombospondin motifs 13 OS=Homo sapiens GN=ADAMTS13 PE=1 SV=1

Match to Query 53296: 2925.342136 from(732.342810,4+) rtinseconds(2070) index(32283)

Title: Locus:1.1.1.3384.11 File:"2013-07-02 CLN FXIII 180 min 3rd F 3.wiff"

Data file C:\Program Files (x86)\Matrix Science\Mascot Daemon\mgf9 FXIII 180 min 3rd\mascot\_daemon\_merge.mgf

Click mouse within plot area to zoom in by factor of two about that point

Or, Plot from  to  Da

Label all possible matches  Label matches used for scoring

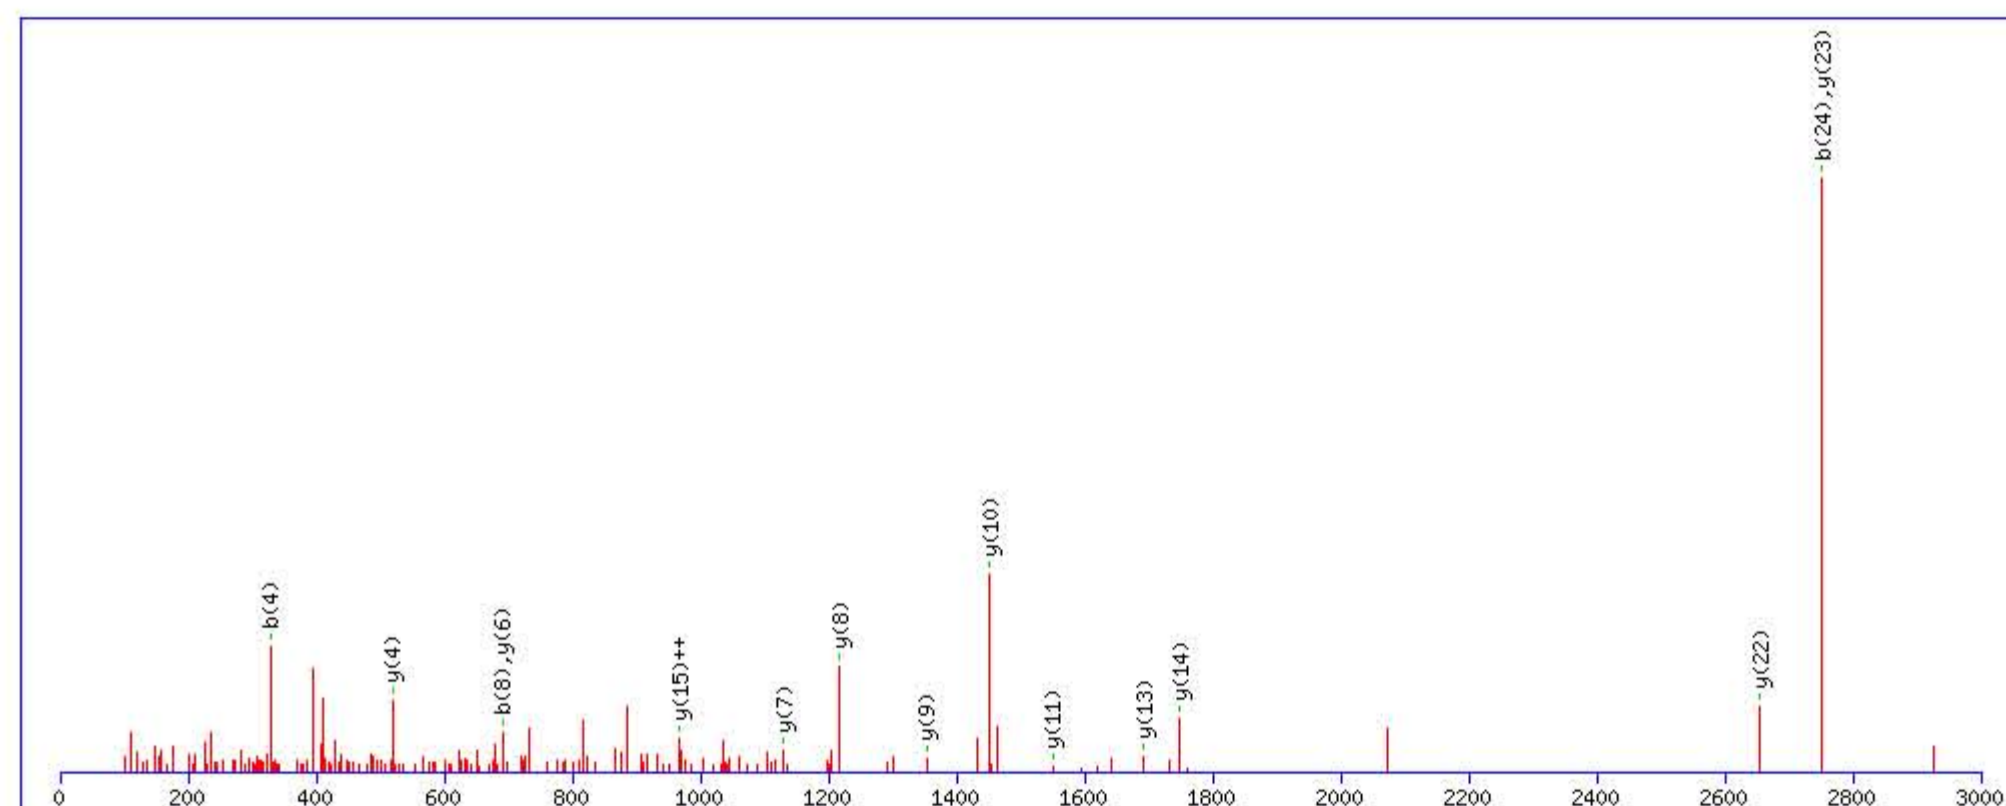

Monoisotopic mass of neutral peptide Mr(calc): 2925.343918

Fixed modifications: Carbamidomethyl (C) (apply to specified residues or termini only)

Variable modifications:

Q19 : Biotin:Thermo-21345 (Q)

Ions Score: 71 Expect: 2.6e-007

Matches : 15/244 fragment ions using 20 most intense peaks [\(help\)](#)

| #  | b                  | b <sup>++</sup> | b <sup>+</sup> | b <sup>+++</sup> | b <sup>0</sup> | b <sup>0++</sup> | Seq. | y                  | y <sup>++</sup>   | y <sup>+</sup> | y <sup>+++</sup> | y <sup>0</sup> | y <sup>0++</sup> | #  |
|----|--------------------|-----------------|----------------|------------------|----------------|------------------|------|--------------------|-------------------|----------------|------------------|----------------|------------------|----|
| 1  | 88.039304          | 44.523290       |                |                  | 70.028739      | 35.518008        | S    |                    |                   |                |                  |                |                  | 25 |
| 2  | 175.071332         | 88.039304       |                |                  | 157.060767     | 79.034021        | S    | 2839.319152        | 1420.163214       | 2822.292603    | 1411.649939      | 2821.308587    | 1411.157931      | 24 |
| 3  | 272.124096         | 136.565686      |                |                  | 254.113531     | 127.560403       | P    | <b>2752.287124</b> | 1376.647200       | 2735.260575    | 1368.133925      | 2734.276559    | 1367.641917      | 23 |
| 4  | <b>329.145560</b>  | 165.076418      |                |                  | 311.134995     | 156.071135       | G    | <b>2655.234360</b> | 1328.120818       | 2638.207811    | 1319.607543      | 2637.223795    | 1319.115535      | 22 |
| 5  | 386.167024         | 193.587150      |                |                  | 368.156459     | 184.581867       | G    | 2598.212896        | 1299.610086       | 2581.186347    | 1291.096811      | 2580.202331    | 1290.604803      | 21 |
| 6  | 457.204138         | 229.105707      |                |                  | 439.193573     | 220.100424       | A    | 2541.191432        | 1271.099354       | 2524.164883    | 1262.586079      | 2523.180867    | 1262.094071      | 20 |
| 7  | 544.236166         | 272.621721      |                |                  | 526.225601     | 263.616438       | S    | 2470.154318        | 1235.580797       | 2453.127769    | 1227.067522      | 2452.143753    | 1226.575514      | 19 |
| 8  | <b>691.304580</b>  | 346.155928      |                |                  | 673.294015     | 337.150645       | F    | 2383.122290        | 1192.064783       | 2366.095741    | 1183.551508      | 2365.111725    | 1183.059500      | 18 |
| 9  | 854.367909         | 427.687592      |                |                  | 836.357344     | 418.682310       | Y    | 2236.053876        | 1118.530576       | 2219.027327    | 1110.017301      | 2218.043311    | 1109.525293      | 17 |
| 10 | 991.426821         | 496.217048      |                |                  | 973.416256     | 487.211766       | H    | 2072.990547        | 1036.998911       | 2055.963998    | 1028.485637      | 2054.979982    | 1027.993629      | 16 |
| 11 | 1177.506134        | 589.256705      |                |                  | 1159.495569    | 580.251422       | W    | 1935.931635        | <b>968.469456</b> | 1918.905086    | 959.956181       | 1917.921070    | 959.464173       | 15 |
| 12 | 1234.527598        | 617.767437      |                |                  | 1216.517033    | 608.762154       | G    | <b>1749.852322</b> | 875.429799        | 1732.825773    | 866.916525       | 1731.841757    | 866.424517       | 14 |
| 13 | 1305.564712        | 653.285994      |                |                  | 1287.554147    | 644.280711       | A    | <b>1692.830858</b> | 846.919067        | 1675.804309    | 838.405793       | 1674.820293    | 837.913785       | 13 |
| 14 | 1376.601826        | 688.804551      |                |                  | 1358.591261    | 679.799268       | A    | 1621.793744        | 811.400510        | 1604.767195    | 802.887236       | 1603.783179    | 802.395228       | 12 |
| 15 | 1475.670240        | 738.338758      |                |                  | 1457.659675    | 729.333475       | V    | <b>1550.756630</b> | 775.881953        | 1533.730081    | 767.368679       | 1532.746065    | 766.876671       | 11 |
| 16 | 1572.723004        | 786.865140      |                |                  | 1554.712439    | 777.859857       | P    | <b>1451.688216</b> | 726.347746        | 1434.661667    | 717.834472       | 1433.677651    | 717.342464       | 10 |
| 17 | 1709.781916        | 855.394596      |                |                  | 1691.771351    | 846.389313       | H    | <b>1354.635452</b> | 677.821364        | 1337.608903    | 669.308090       | 1336.624887    | 668.816082       | 9  |
| 18 | 1796.813944        | 898.910610      |                |                  | 1778.803379    | 889.905327       | S    | <b>1217.576540</b> | 609.291908        | 1200.549991    | 600.778634       | 1199.565975    | 600.286626       | 8  |
| 19 | 2236.039270        | 1118.523273     | 2219.012721    | 1110.009998      | 2218.028705    | 1109.517990      | Q    | <b>1130.544512</b> | 565.775894        | 1113.517963    | 557.262620       | 1112.533947    | 556.770612       | 7  |
| 20 | 2293.060734        | 1147.034005     | 2276.034185    | 1138.520730      | 2275.050169    | 1138.028722      | G    | <b>691.319186</b>  | 346.163231        | 674.292637     | 337.649956       | 673.308621     | 337.157948       | 6  |
| 21 | 2408.087677        | 1204.547476     | 2391.061128    | 1196.034202      | 2390.077112    | 1195.542194      | D    | 634.297722         | 317.652499        | 617.271173     | 309.139225       | 616.287157     | 308.647217       | 5  |
| 22 | 2479.124791        | 1240.066033     | 2462.098242    | 1231.552759      | 2461.114226    | 1231.060751      | A    | <b>519.270779</b>  | 260.139028        | 502.244230     | 251.625753       |                |                  | 4  |
| 23 | 2592.208855        | 1296.608065     | 2575.182306    | 1288.094791      | 2574.198290    | 1287.602783      | L    | 448.233665         | 224.620470        | 431.207116     | 216.107196       |                |                  | 3  |
| 24 | <b>2752.239504</b> | 1376.623390     | 2735.212955    | 1368.110115      | 2734.228939    | 1367.618107      | C    | 335.149601         | 168.078438        | 318.123052     | 159.565164       |                |                  | 2  |
| 25 |                    |                 |                |                  |                |                  | R    | 175.118952         | 88.063114         | 158.092403     | 79.549839        |                |                  | 1  |

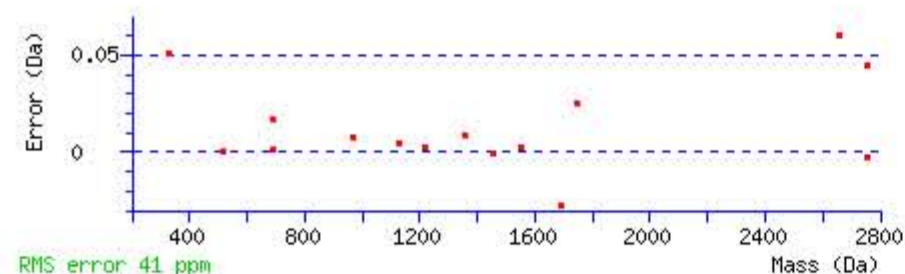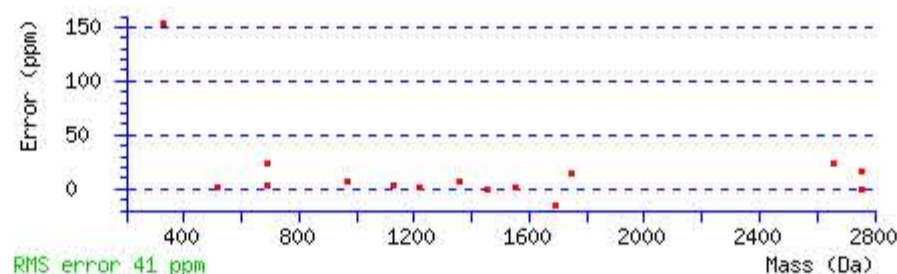

NCBI BLAST search of **SSPGGASFYHWGAAVPHSQGDALCR**

(Parameters: blastp, nr protein database, expect=20000, no filter, PAM30)

Other BLAST [web gateways](#)

## All matches to this query

| Score | Mr(calc):   | Delta     | Sequence                                      |
|-------|-------------|-----------|-----------------------------------------------|
| 70.8  | 2925.343918 | -0.001782 | <a href="#">SSPGGASFYHWGAAVPHSQGDALCR</a>     |
| 0.5   | 2925.349747 | -0.007611 | <a href="#">GSYSNSPSNPVNSRANQDFSALMR</a>      |
| 0.3   | 2925.312012 | 0.030124  | <a href="#">MSASAPAAEGEGTPTQPASEKEPEMPGPR</a> |

Mascot: <http://www.matrixscience.com/>

# MASCOT Search Results

## Peptide View

MS/MS Fragmentation of **HQGVMVGMGQK**

Found in **ACTA\_HUMAN**, Actin, aortic smooth muscle OS=Homo sapiens GN=ACTA2 PE=1 SV=1

Match to Query 26756: 1481.718388 from(741.866470,2+) rtinseconds(1646) index(29758)

Title: Locus:1.1.1.3236.21 File:"2013-07-02 CLN FXIII 180 min 3rd F 3.wiff"

Data file C:\Program Files (x86)\Matrix Science\Mascot Daemon\mgf\9 FXIII 180 min 3rd\mascot\_daemon\_merge.mgf

Click mouse within plot area to zoom in by factor of two about that point

Or, Plot from  to  Da

Label all possible matches  Label matches used for scoring

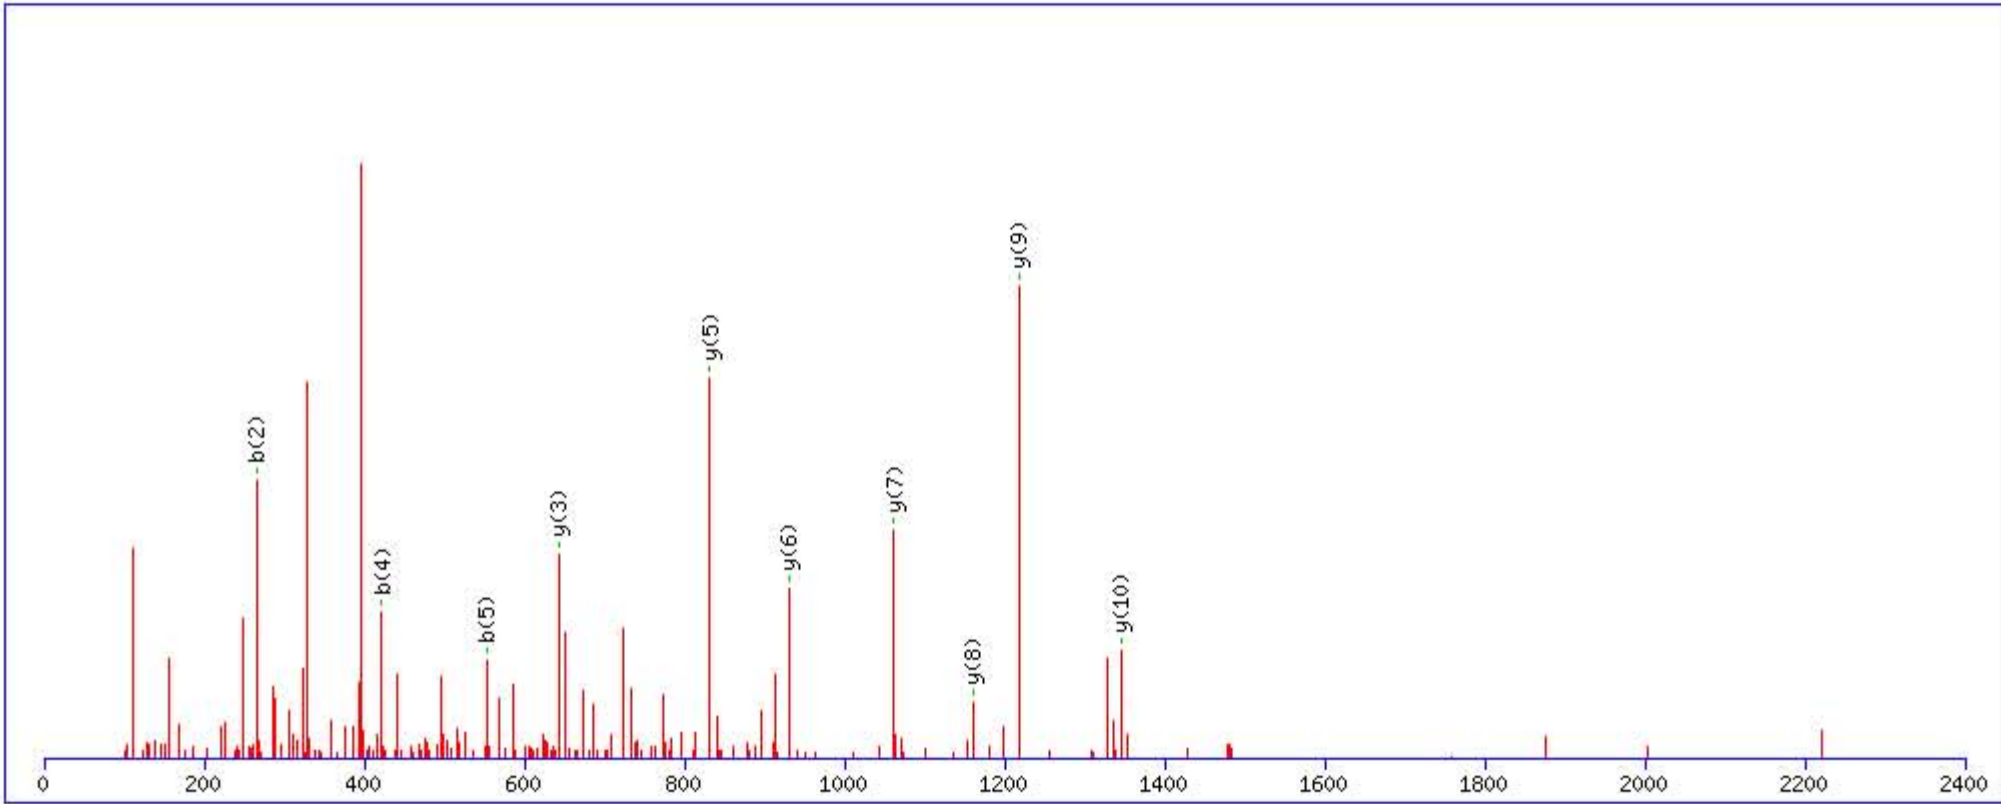

Monoisotopic mass of neutral peptide Mr(calc): 1481.730545

Fixed modifications: Carbamidomethyl (C) (apply to specified residues or termini only)

Variable modifications:

Q10 : Biotin:Thermo-21345 (Q)

Ions Score: 56 Expect: 0.0001

Matches : 10/78 fragment ions using 14 most intense peaks [\(help\)](#)

| #  | b                 | b <sup>++</sup> | b <sup>*</sup> | b <sup>***</sup> | Seq. | y                  | y <sup>++</sup> | y <sup>*</sup> | y <sup>***</sup> | #  |
|----|-------------------|-----------------|----------------|------------------|------|--------------------|-----------------|----------------|------------------|----|
| 1  | 138.066188        | 69.536732       |                |                  | H    |                    |                 |                |                  | 11 |
| 2  | <b>266.124766</b> | 133.566021      | 249.098217     | 125.052746       | Q    | <b>1345.678898</b> | 673.343087      | 1328.652349    | 664.829813       | 10 |
| 3  | 323.146230        | 162.076753      | 306.119681     | 153.563478       | G    | <b>1217.620320</b> | 609.313798      | 1200.593771    | 600.800524       | 9  |
| 4  | <b>422.214644</b> | 211.610960      | 405.188095     | 203.097685       | V    | <b>1160.598856</b> | 580.803066      | 1143.572307    | 572.289792       | 8  |
| 5  | <b>553.255129</b> | 277.131203      | 536.228580     | 268.617928       | M    | <b>1061.530442</b> | 531.268859      | 1044.503893    | 522.755585       | 7  |
| 6  | 652.323543        | 326.665410      | 635.296994     | 318.152135       | V    | <b>930.489957</b>  | 465.748617      | 913.463408     | 457.235342       | 6  |
| 7  | 709.345007        | 355.176142      | 692.318458     | 346.662867       | G    | <b>831.421543</b>  | 416.214410      | 814.394994     | 407.701135       | 5  |
| 8  | 840.385492        | 420.696384      | 823.358943     | 412.183110       | M    | 774.400079         | 387.703678      | 757.373530     | 379.190403       | 4  |
| 9  | 897.406956        | 449.207116      | 880.380407     | 440.693842       | G    | <b>643.359594</b>  | 322.183435      | 626.333045     | 313.670161       | 3  |
| 10 | 1336.632282       | 668.819779      | 1319.605733    | 660.306505       | Q    | 586.338130         | 293.672703      | 569.311581     | 285.159429       | 2  |
| 11 |                   |                 |                |                  | K    | 147.112804         | 74.060040       | 130.086255     | 65.546765        | 1  |

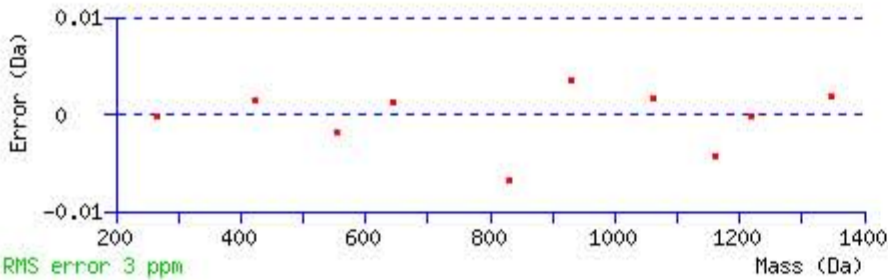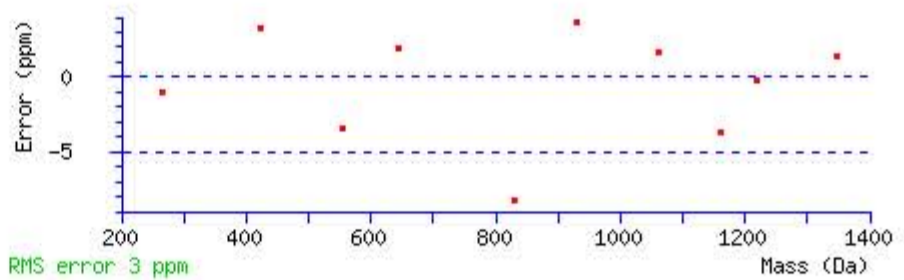

NCBI BLAST search of [HQGVMVGMGQK](#)

(Parameters: blastp, nr protein database, expect=20000, no filter, PAM30)

Other BLAST [web gateways](#)

### All matches to this query

| Score | Mr(calc):   | Delta     | Sequence                    |
|-------|-------------|-----------|-----------------------------|
| 56.0  | 1481.730545 | -0.012157 | <a href="#">HQGVMVGMGQK</a> |

Mascot: <http://www.matrixscience.com/>

# MASCOT Search Results

## Peptide View

MS/MS Fragmentation of **DSYVGDEAQS**K

Found in **ACTA\_HUMAN**, Actin, aortic smooth muscle OS=Homo sapiens GN=ACTA2 PE=1 SV=1

Match to Query 27447: 1508.675648 from(755.345100,2+) rtinseconds(1606) index(16558)

Title: Locus:1.1.1.3125.10 File:"2013-07-02 CLN FXIII 180 min 3rd F 2.wiff"

Data file C:\Program Files (x86)\Matrix Science\Mascot Daemon\mgf9 FXIII 180 min 3rd\mascot\_daemon\_merge.mgf

Click mouse within plot area to zoom in by factor of two about that point

Or, Plot from  to  Da

Label all possible matches  Label matches used for scoring

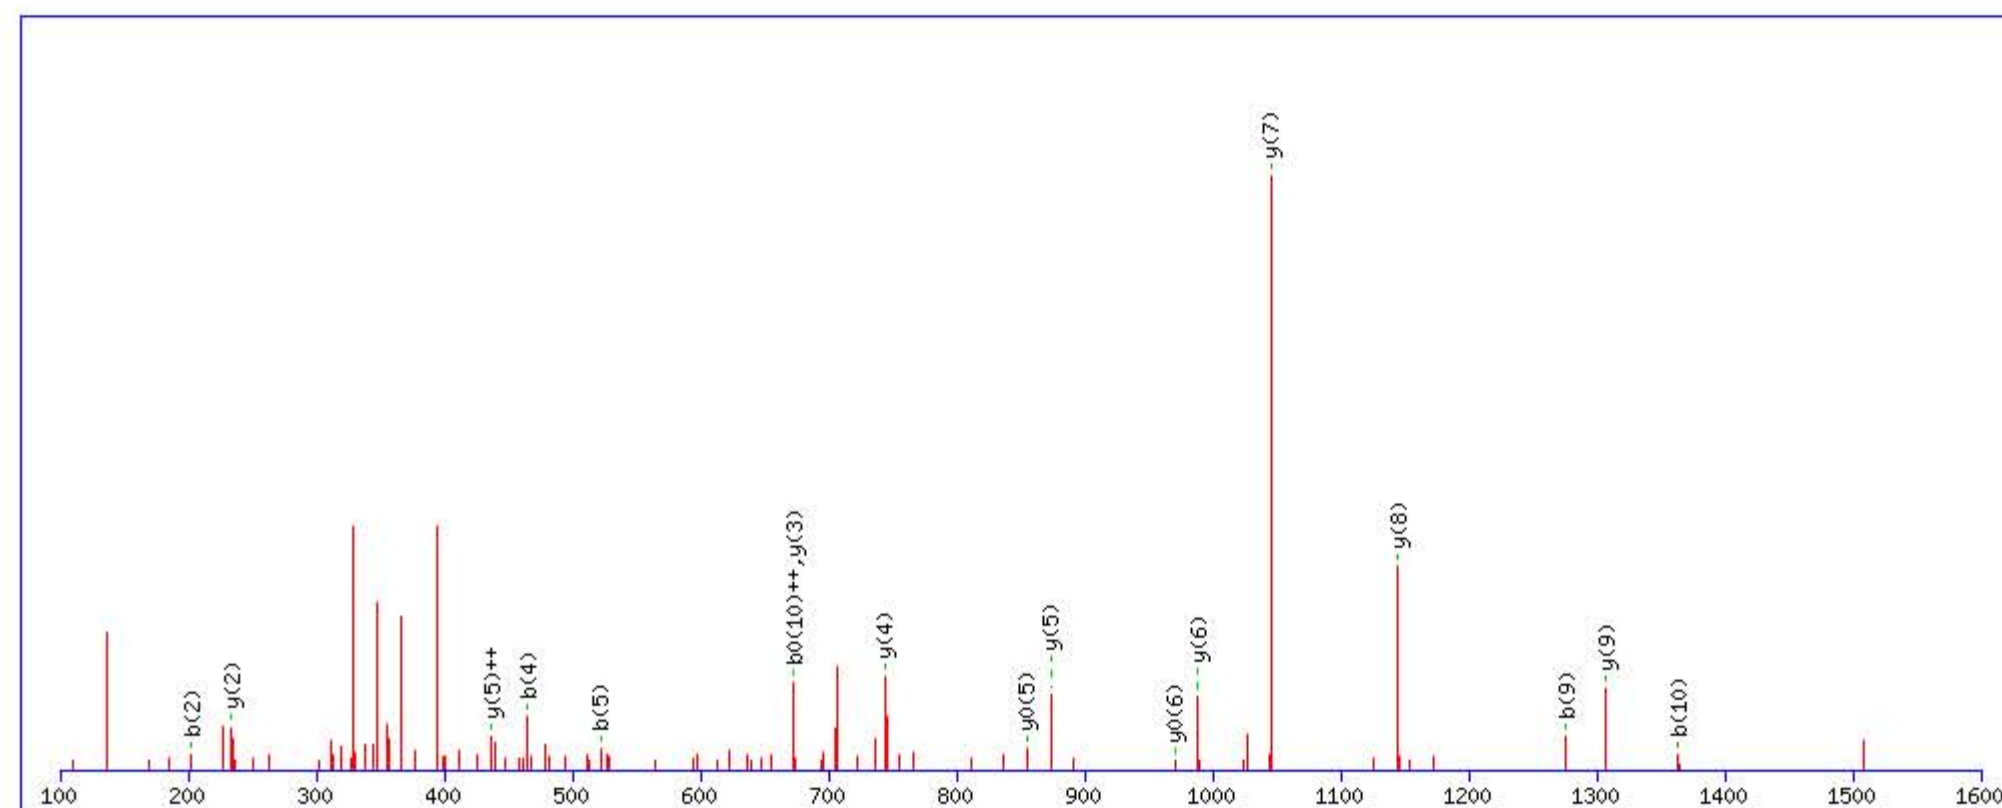

Monoisotopic mass of neutral peptide Mr(calc): 1508.681702

Fixed modifications: Carbamidomethyl (C) (apply to specified residues or termini only)

Variable modifications:

Q9 : Biotin:Thermo-21345 (Q)

Ions Score: 54 Expect: 5.9e-005

Matches : 17/102 fragment ions using 26 most intense peaks [\(help\)](#)

| #  | b                  | b <sup>++</sup> | b <sup>+</sup> | b <sup>*++</sup> | b <sup>0</sup> | b <sup>0++</sup>  | Seq. | y                  | y <sup>++</sup>   | y <sup>+</sup> | y <sup>*++</sup> | y <sup>0</sup>    | y <sup>0++</sup> | #  |
|----|--------------------|-----------------|----------------|------------------|----------------|-------------------|------|--------------------|-------------------|----------------|------------------|-------------------|------------------|----|
| 1  | 116.034219         | 58.520748       |                |                  | 98.023654      | 49.515465         | D    |                    |                   |                |                  |                   |                  | 11 |
| 2  | <b>203.066247</b>  | 102.036761      |                |                  | 185.055682     | 93.031479         | S    | 1394.662043        | 697.834660        | 1377.635494    | 689.321385       | 1376.651478       | 688.829377       | 10 |
| 3  | 366.129576         | 183.568426      |                |                  | 348.119011     | 174.563144        | Y    | <b>1307.630015</b> | 654.318646        | 1290.603466    | 645.805371       | 1289.619450       | 645.313363       | 9  |
| 4  | <b>465.197990</b>  | 233.102633      |                |                  | 447.187425     | 224.097351        | V    | <b>1144.566686</b> | 572.786981        | 1127.540137    | 564.273707       | 1126.556121       | 563.781699       | 8  |
| 5  | <b>522.219454</b>  | 261.613365      |                |                  | 504.208889     | 252.608083        | G    | <b>1045.498272</b> | 523.252774        | 1028.471723    | 514.739500       | 1027.487707       | 514.247492       | 7  |
| 6  | 637.246397         | 319.126837      |                |                  | 619.235832     | 310.121554        | D    | <b>988.476808</b>  | 494.742042        | 971.450259     | 486.228768       | <b>970.466243</b> | 485.736760       | 6  |
| 7  | 766.288990         | 383.648133      |                |                  | 748.278425     | 374.642851        | E    | <b>873.449865</b>  | <b>437.228571</b> | 856.423316     | 428.715296       | <b>855.439300</b> | 428.223288       | 5  |
| 8  | 837.326104         | 419.166690      |                |                  | 819.315539     | 410.161408        | A    | <b>744.407272</b>  | 372.707274        | 727.380723     | 364.194000       | 726.396707        | 363.701992       | 4  |
| 9  | <b>1276.551430</b> | 638.779353      | 1259.524881    | 630.266079       | 1258.540865    | 629.774070        | Q    | <b>673.370158</b>  | 337.188717        | 656.343609     | 328.675443       | 655.359593        | 328.183435       | 3  |
| 10 | <b>1363.583458</b> | 682.295367      | 1346.556909    | 673.782093       | 1345.572893    | <b>673.290085</b> | S    | <b>234.144832</b>  | 117.576054        | 217.118283     | 109.062780       | 216.134267        | 108.570772       | 2  |
| 11 |                    |                 |                |                  |                |                   | K    | 147.112804         | 74.060040         | 130.086255     | 65.546765        |                   |                  | 1  |

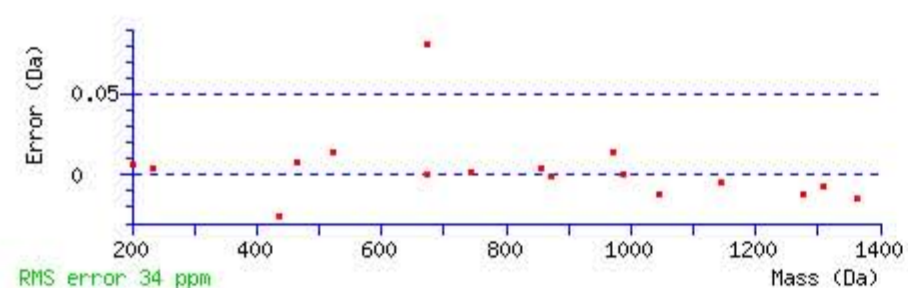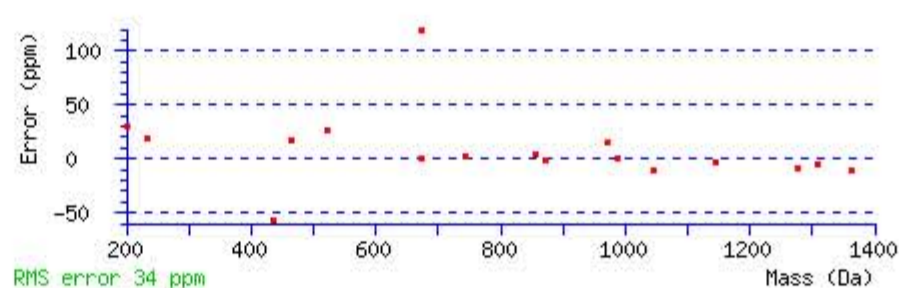

NCBI BLAST search of **DSYVGDEAQS**K

(Parameters: blastp, nr protein database, expect=20000, no filter, PAM30)

Other BLAST [web gateways](#)

All matches to this query

| Score | Mr(calc):   | Delta     | Sequence                          |
|-------|-------------|-----------|-----------------------------------|
| 53.5  | 1508.681702 | -0.006054 | <a href="#">DSYVGDEAQS</a> K      |
| 7.9   | 1508.690277 | -0.014629 | <a href="#">GGRGGMGGSDRGGFN</a> K |

Mascot: <http://www.matrixscience.com/>

# MASCOT Search Results

## Peptide View

MS/MS Fragmentation of **SYELPDGQVITIGNER**

Found in **ACTA\_HUMAN**, Actin, aortic smooth muscle OS=Homo sapiens GN=ACTA2 PE=1 SV=1

Match to Query 41632: 2101.048392 from(701.356740,3+) rtinseconds(2627) index(35424)

Title: Locus:1.1.1.3578.11 File:"2013-07-02 CLN FXIII 180 min 3rd F 3.wiff"

Data file C:\Program Files (x86)\Matrix Science\Mascot Daemon\mgf9 FXIII 180 min 3rd\mascot\_daemon\_merge.mgf

Click mouse within plot area to zoom in by factor of two about that point

Or, Plot from  to  Da

Label all possible matches  Label matches used for scoring

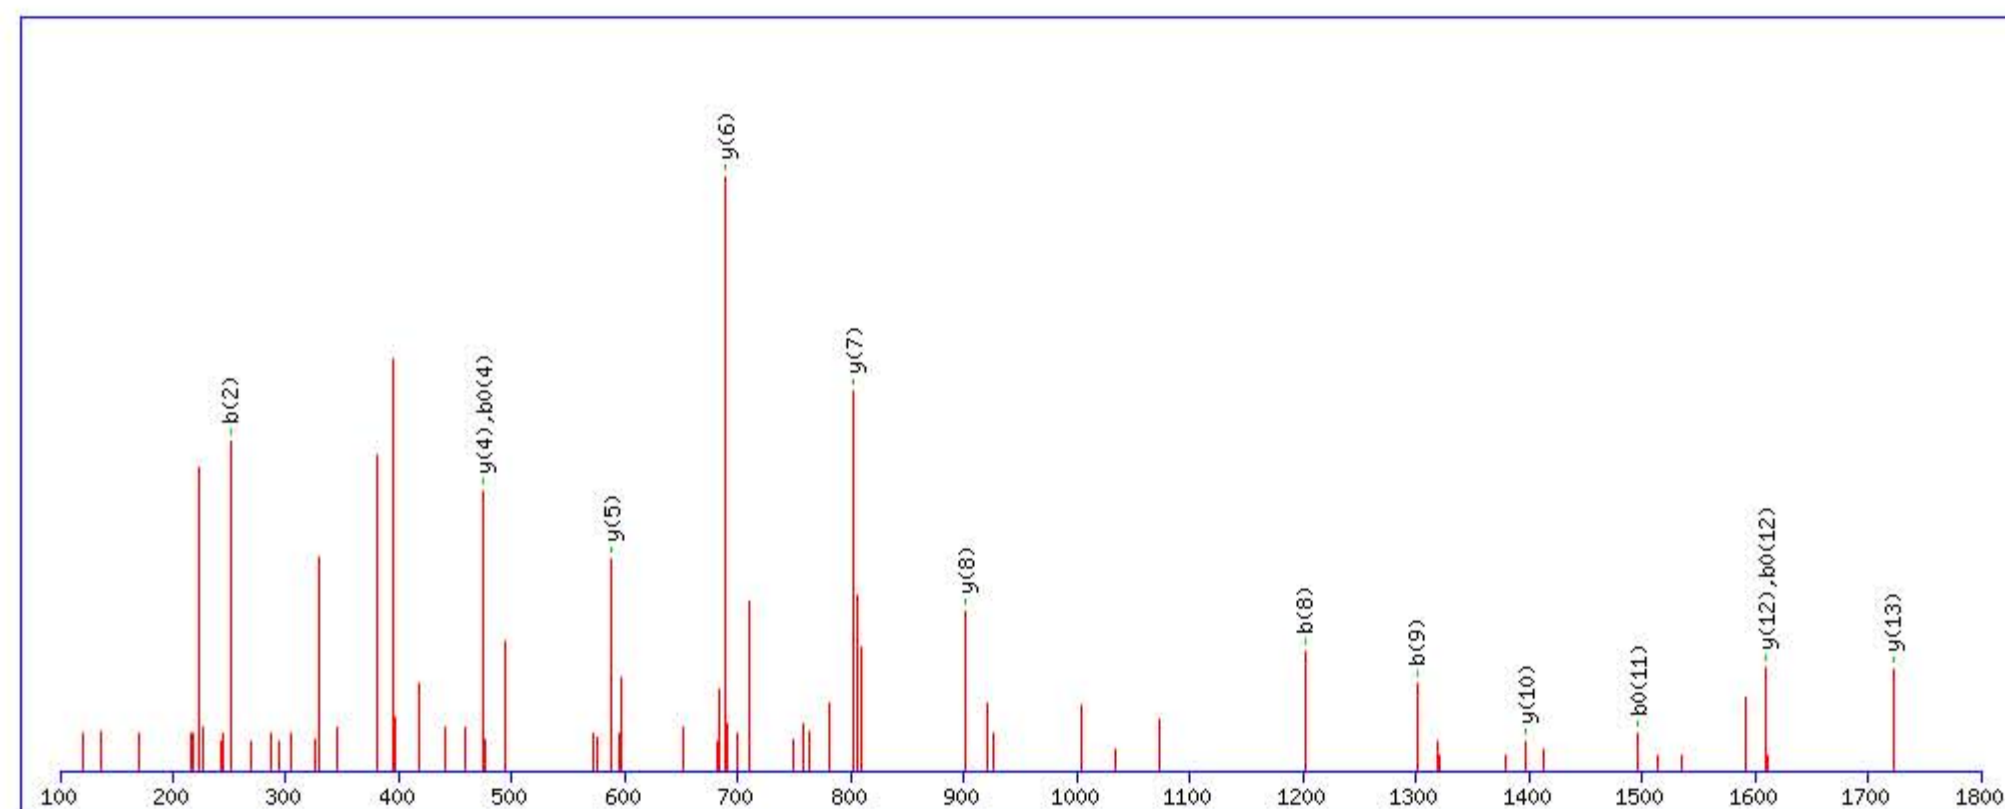

Monoisotopic mass of neutral peptide Mr(calc): 2101.051376

Fixed modifications: Carbamidomethyl (C) (apply to specified residues or termini only)

Variable modifications:

Q8 : Biotin:Thermo-21345 (Q)

Ions Score: 59 Expect: 3.2e-006

Matches : 14/164 fragment ions using 16 most intense peaks [\(help\)](#)

| #  | b                  | b <sup>++</sup> | b <sup>*</sup> | b <sup>*++</sup> | b <sup>0</sup>     | b <sup>0++</sup> | Seq. | y                  | y <sup>++</sup> | y <sup>*</sup> | y <sup>*++</sup> | y <sup>0</sup> | y <sup>0++</sup> | #  |
|----|--------------------|-----------------|----------------|------------------|--------------------|------------------|------|--------------------|-----------------|----------------|------------------|----------------|------------------|----|
| 1  | 88.039304          | 44.523290       |                |                  | 70.028739          | 35.518008        | S    |                    |                 |                |                  |                |                  | 16 |
| 2  | <b>251.102633</b>  | 126.054954      |                |                  | 233.092068         | 117.049672       | Y    | 2015.026640        | 1008.016958     | 1998.000091    | 999.503683       | 1997.016075    | 999.011675       | 15 |
| 3  | 380.145226         | 190.576251      |                |                  | 362.134661         | 181.570969       | E    | 1851.963311        | 926.485294      | 1834.936762    | 917.972019       | 1833.952746    | 917.480011       | 14 |
| 4  | 493.229290         | 247.118283      |                |                  | <b>475.218725</b>  | 238.113001       | L    | <b>1722.920718</b> | 861.963997      | 1705.894169    | 853.450722       | 1704.910153    | 852.958714       | 13 |
| 5  | 590.282054         | 295.644665      |                |                  | 572.271489         | 286.639383       | P    | <b>1609.836654</b> | 805.421965      | 1592.810105    | 796.908691       | 1591.826089    | 796.416682       | 12 |
| 6  | 705.308997         | 353.158137      |                |                  | 687.298432         | 344.152854       | D    | 1512.783890        | 756.895583      | 1495.757341    | 748.382309       | 1494.773325    | 747.890300       | 11 |
| 7  | 762.330461         | 381.668869      |                |                  | 744.319896         | 372.663586       | G    | <b>1397.756947</b> | 699.382111      | 1380.730398    | 690.868837       | 1379.746382    | 690.376829       | 10 |
| 8  | <b>1201.555787</b> | 601.281532      | 1184.529238    | 592.768257       | 1183.545222        | 592.276249       | Q    | 1340.735483        | 670.871379      | 1323.708934    | 662.358105       | 1322.724918    | 661.866097       | 9  |
| 9  | <b>1300.624201</b> | 650.815739      | 1283.597652    | 642.302464       | 1282.613636        | 641.810456       | V    | <b>901.510157</b>  | 451.258716      | 884.483608     | 442.745442       | 883.499592     | 442.253434       | 8  |
| 10 | 1413.708265        | 707.357771      | 1396.681716    | 698.844496       | 1395.697700        | 698.352488       | I    | <b>802.441743</b>  | 401.724509      | 785.415194     | 393.211235       | 784.431178     | 392.719227       | 7  |
| 11 | 1514.755944        | 757.881610      | 1497.729395    | 749.368336       | <b>1496.745379</b> | 748.876328       | T    | <b>689.357679</b>  | 345.182478      | 672.331130     | 336.669203       | 671.347114     | 336.177195       | 6  |
| 12 | 1627.840008        | 814.423642      | 1610.813459    | 805.910368       | <b>1609.829443</b> | 805.418359       | I    | <b>588.310000</b>  | 294.658638      | 571.283451     | 286.145363       | 570.299435     | 285.653355       | 5  |
| 13 | 1684.861472        | 842.934374      | 1667.834923    | 834.421099       | 1666.850907        | 833.929091       | G    | <b>475.225936</b>  | 238.116606      | 458.199387     | 229.603331       | 457.215371     | 229.111323       | 4  |
| 14 | 1798.904399        | 899.955837      | 1781.877850    | 891.442563       | 1780.893834        | 890.950555       | N    | 418.204472         | 209.605874      | 401.177923     | 201.092600       | 400.193907     | 200.600592       | 3  |
| 15 | 1927.946992        | 964.477134      | 1910.920443    | 955.963860       | 1909.936427        | 955.471851       | E    | 304.161545         | 152.584411      | 287.134996     | 144.071136       | 286.150980     | 143.579128       | 2  |
| 16 |                    |                 |                |                  |                    |                  | R    | 175.118952         | 88.063114       | 158.092403     | 79.549839        |                |                  | 1  |

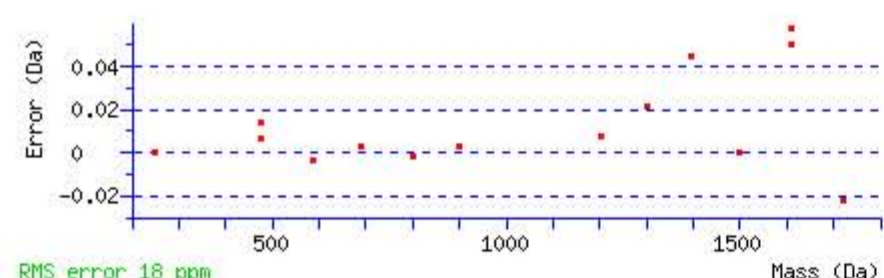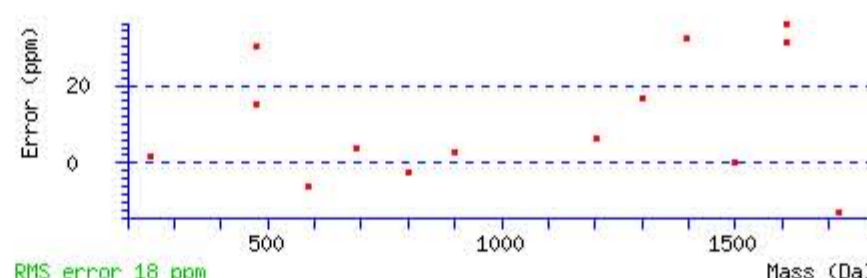

NCBI BLAST search of [SYELPDGQVITIGNER](#)

(Parameters: blastp, nr protein database, expect=20000, no filter, PAM30)

Other BLAST [web gateways](#)

### All matches to this query

| Score | Mr(calc):   | Delta     | Sequence                          |
|-------|-------------|-----------|-----------------------------------|
| 59.1  | 2101.051376 | -0.002984 | <a href="#">SYELPDGQVITIGNER</a>  |
| 0.5   | 2101.022842 | 0.025550  | <a href="#">SDGSKITYIDYYRQQHK</a> |

Mascot: <http://www.matrixscience.com/>

# MASCOT Search Results

## Peptide View

MS/MS Fragmentation of **QDSISSK**

Found in **AFAM\_HUMAN**, Afamin OS=Homo sapiens GN=AFM PE=1 SV=1

Match to Query 13386: 1074.538028 from(538.276290,2+) rtinseconds(1450) index(1658)

Title: Locus:1.1.1.3024.14 File:"2013-07-02 CLN FXIII 180 min 3rd F 1.wiff"

Data file C:\Program Files (x86)\Matrix Science\Mascot Daemon\mgf9 FXIII 180 min 3rd\mascot\_daemon\_merge.mgf

Click mouse within plot area to zoom in by factor of two about that point

Or, Plot from  to  Da

Label all possible matches  Label matches used for scoring

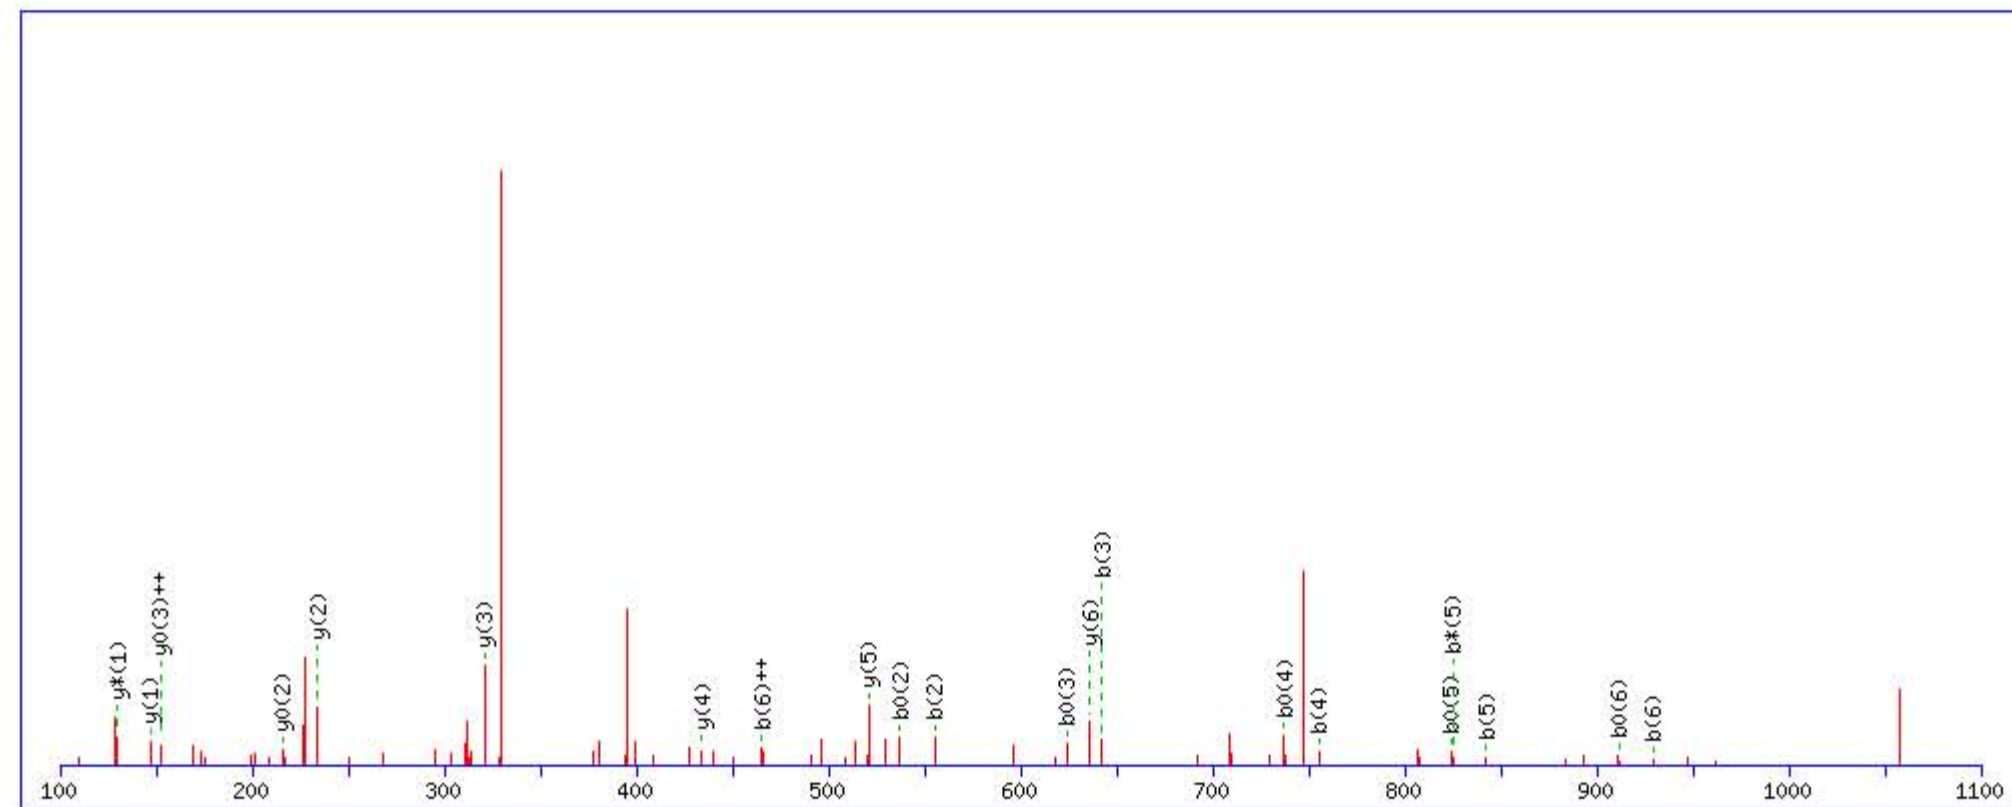

Monoisotopic mass of neutral peptide Mr(calc): 1074.537933

Fixed modifications: Carbamidomethyl (C) (apply to specified residues or termini only)

Variable modifications:

Q1 : Biotin:Thermo-21345 (Q)

Ions Score: 33 Expect: 0.01

Matches : 21/68 fragment ions using 37 most intense peaks [\(help\)](#)

| # | b                 | b <sup>++</sup>   | b <sup>*</sup>    | b <sup>*++</sup> | b <sup>0</sup>    | b <sup>0++</sup> | Seq. | y                 | y <sup>++</sup> | y <sup>*</sup>    | y <sup>*++</sup> | y <sup>0</sup>    | y <sup>0++</sup>  | # |
|---|-------------------|-------------------|-------------------|------------------|-------------------|------------------|------|-------------------|-----------------|-------------------|------------------|-------------------|-------------------|---|
| 1 | 440.232602        | 220.619939        | 423.206053        | 212.106664       |                   |                  | Q    |                   |                 |                   |                  |                   |                   | 7 |
| 2 | <b>555.259545</b> | 278.133411        | 538.232996        | 269.620136       | <b>537.248980</b> | 269.128128       | D    | <b>636.319895</b> | 318.663586      | 619.293346        | 310.150311       | 618.309330        | 309.658303        | 6 |
| 3 | <b>642.291573</b> | 321.649425        | 625.265024        | 313.136150       | <b>624.281008</b> | 312.644142       | S    | <b>521.292952</b> | 261.150114      | 504.266403        | 252.636840       | 503.282387        | 252.144832        | 5 |
| 4 | <b>755.375637</b> | 378.191457        | 738.349088        | 369.678182       | <b>737.365072</b> | 369.186174       | I    | <b>434.260924</b> | 217.634100      | 417.234375        | 209.120826       | 416.250359        | 208.628818        | 4 |
| 5 | <b>842.407665</b> | 421.707471        | <b>825.381116</b> | 413.194196       | <b>824.397100</b> | 412.702188       | S    | <b>321.176860</b> | 161.092068      | 304.150311        | 152.578794       | 303.166295        | <b>152.086786</b> | 3 |
| 6 | <b>929.439693</b> | <b>465.223484</b> | 912.413144        | 456.710210       | <b>911.429128</b> | 456.218202       | S    | <b>234.144832</b> | 117.576054      | 217.118283        | 109.062780       | <b>216.134267</b> | 108.570772        | 2 |
| 7 |                   |                   |                   |                  |                   |                  | K    | <b>147.112804</b> | 74.060040       | <b>130.086255</b> | 65.546766        |                   |                   | 1 |

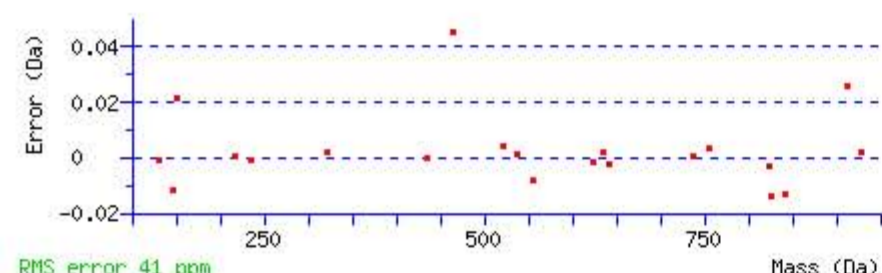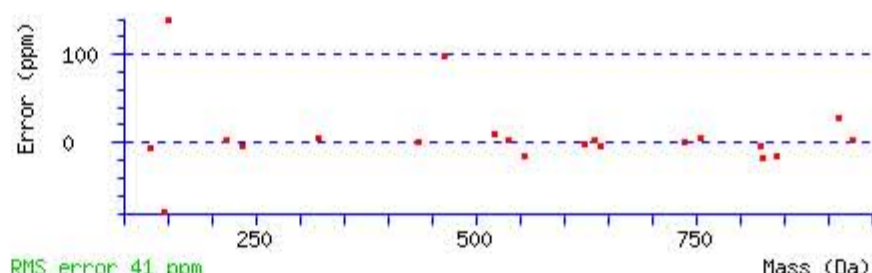

NCBI BLAST search of **QDSISSK**

(Parameters: blastp, nr protein database, expect=20000, no filter, PAM30)

Other BLAST [web gateways](#)

All matches to this query

| Score | Mr(calc):   | Delta     | Sequence                   |
|-------|-------------|-----------|----------------------------|
| 32.9  | 1074.537933 | 0.000095  | <a href="#">QDSISSK</a>    |
| 11.3  | 1074.530548 | 0.007480  | <a href="#">QVTEPTSSAR</a> |
| 7.4   | 1074.549164 | -0.011136 | <a href="#">NIRPVDMSK</a>  |
| 6.0   | 1074.537933 | 0.000095  | <a href="#">QDSSKSI</a>    |
| 3.9   | 1074.531418 | 0.006610  | <a href="#">LLACPSVCR</a>  |
| 3.5   | 1074.553192 | -0.015164 | <a href="#">QPSFSAK</a>    |
| 3.2   | 1074.537933 | 0.000095  | <a href="#">SQEVSSK</a>    |
| 2.4   | 1074.530518 | 0.007510  | <a href="#">KPEDRSSEK</a>  |
| 2.3   | 1074.549164 | -0.011136 | <a href="#">KSTLSMHQK</a>  |
| 1.9   | 1074.537949 | 0.000079  | <a href="#">ELVVNVCDK</a>  |

# **MASCOT** Mascot Search Results

## Peptide View

MS/MS Fragmentation of **AFSSYQK**

Found in **AFAM\_HUMAN**, Afamin OS=Homo sapiens GN=AFM PE=1 SV=1

Match to Query 16020: 1140.562508 from(571.288530,2+) rtinseconds(1673) index(3088)

Title: Locus:1.1.1.3102.8 File:"2013-07-02 CLN FXIII 180 min 3rd F 1.wiff"

Data file C:\Program Files (x86)\Matrix Science\Mascot Daemon\mgf9 FXIII 180 min 3rd\mascot\_daemon\_merge.mgf

Click mouse within plot area to zoom in by factor of two about that point

Or, Plot from  to  Da

Label all possible matches  Label matches used for scoring

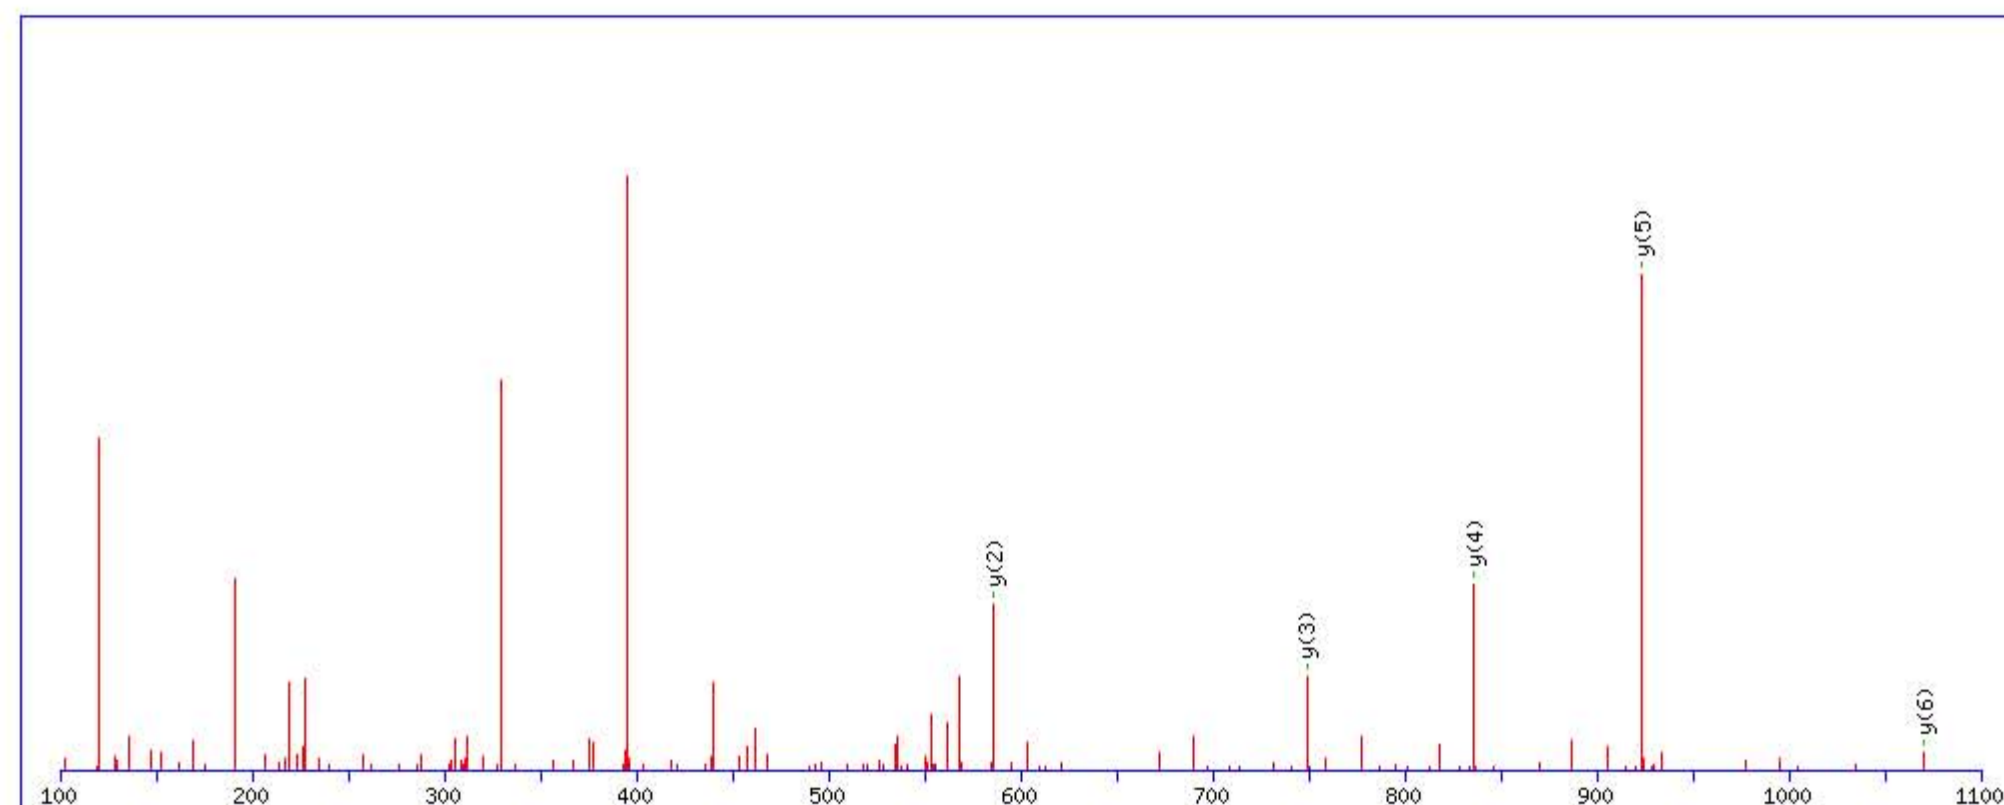

Monoisotopic mass of neutral peptide Mr(calc): 1140.563751

Fixed modifications: Carbamidomethyl (C) (apply to specified residues or termini only)

Variable modifications:

Q6 : Biotin:Thermo-21345 (Q)

Ions Score: 28 Expect: 0.0097

Matches : 5/52 fragment ions using 10 most intense peaks [\(help\)](#)

| # | b          | b <sup>++</sup> | b <sup>*</sup> | b <sup>*++</sup> | b <sup>0</sup> | b <sup>0++</sup> | Seq. | y                  | y <sup>++</sup> | y <sup>*</sup> | y <sup>*++</sup> | y <sup>0</sup> | y <sup>0++</sup> | # |
|---|------------|-----------------|----------------|------------------|----------------|------------------|------|--------------------|-----------------|----------------|------------------|----------------|------------------|---|
| 1 | 72.044390  | 36.525833       |                |                  |                |                  | A    |                    |                 |                |                  |                |                  | 7 |
| 2 | 219.112804 | 110.060040      |                |                  |                |                  | F    | <b>1070.533929</b> | 535.770603      | 1053.507380    | 527.257328       | 1052.523364    | 526.765320       | 6 |
| 3 | 306.144832 | 153.576054      |                |                  | 288.134267     | 144.570772       | S    | <b>923.465515</b>  | 462.236396      | 906.438966     | 453.723121       | 905.454950     | 453.231113       | 5 |
| 4 | 393.176860 | 197.092068      |                |                  | 375.166295     | 188.086785       | S    | <b>836.433487</b>  | 418.720382      | 819.406938     | 410.207107       | 818.422922     | 409.715099       | 4 |
| 5 | 556.240189 | 278.623733      |                |                  | 538.229624     | 269.618450       | Y    | <b>749.401459</b>  | 375.204368      | 732.374910     | 366.691093       |                |                  | 3 |
| 6 | 995.465515 | 498.236396      | 978.438966     | 489.723121       | 977.454950     | 489.231113       | Q    | <b>586.338130</b>  | 293.672703      | 569.311581     | 285.159429       |                |                  | 2 |
| 7 |            |                 |                |                  |                |                  | K    | 147.112804         | 74.060040       | 130.086255     | 65.546765        |                |                  | 1 |

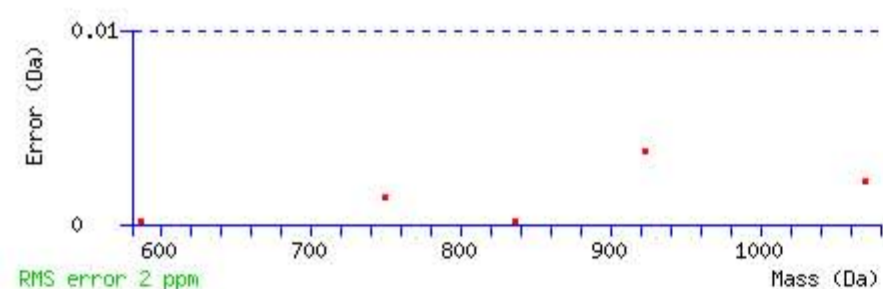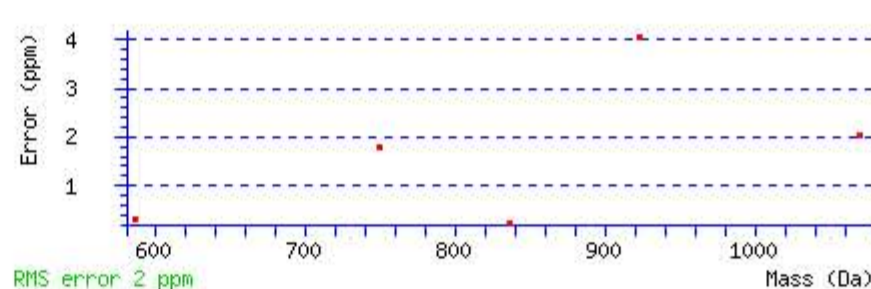

NCBI BLAST search of **AFSSYQK**

(Parameters: blastp, nr protein database, expect=20000, no filter, PAM30)

Other BLAST [web gateways](#)

All matches to this query

| Score | Mr(calc):   | Delta     | Sequence                   |
|-------|-------------|-----------|----------------------------|
| 27.9  | 1140.563751 | -0.001243 | <a href="#">AFSSYQK</a>    |
| 6.1   | 1140.559723 | 0.002785  | <a href="#">AFSRSSDLMK</a> |
| 1.6   | 1140.545792 | 0.016716  | <a href="#">MAESAPARHR</a> |
| 0.9   | 1140.552322 | 0.010186  | <a href="#">AHDEAVRSEK</a> |

Mascot: <http://www.matrixscience.com/>

# MASCOT SCIENCE Mascot Search Results

## Peptide View

MS/MS Fragmentation of **VNCLQTR**

Found in **AFAM\_HUMAN**, Afamin OS=Homo sapiens GN=AFM PE=1 SV=1

Match to Query 17758: 1200.601968 from(601.308260,2+) rtinseconds(1543) index(16135)

Title: Locus:1.1.1.3103.8 File:"2013-07-02 CLN FXIII 180 min 3rd F 2.wiff"

Data file C:\Program Files (x86)\Matrix Science\Mascot Daemon\mgf9 FXIII 180 min 3rd\mascot\_daemon\_merge.mgf

Click mouse within plot area to zoom in by factor of two about that point

Or, Plot from  to  Da

Label all possible matches  Label matches used for scoring

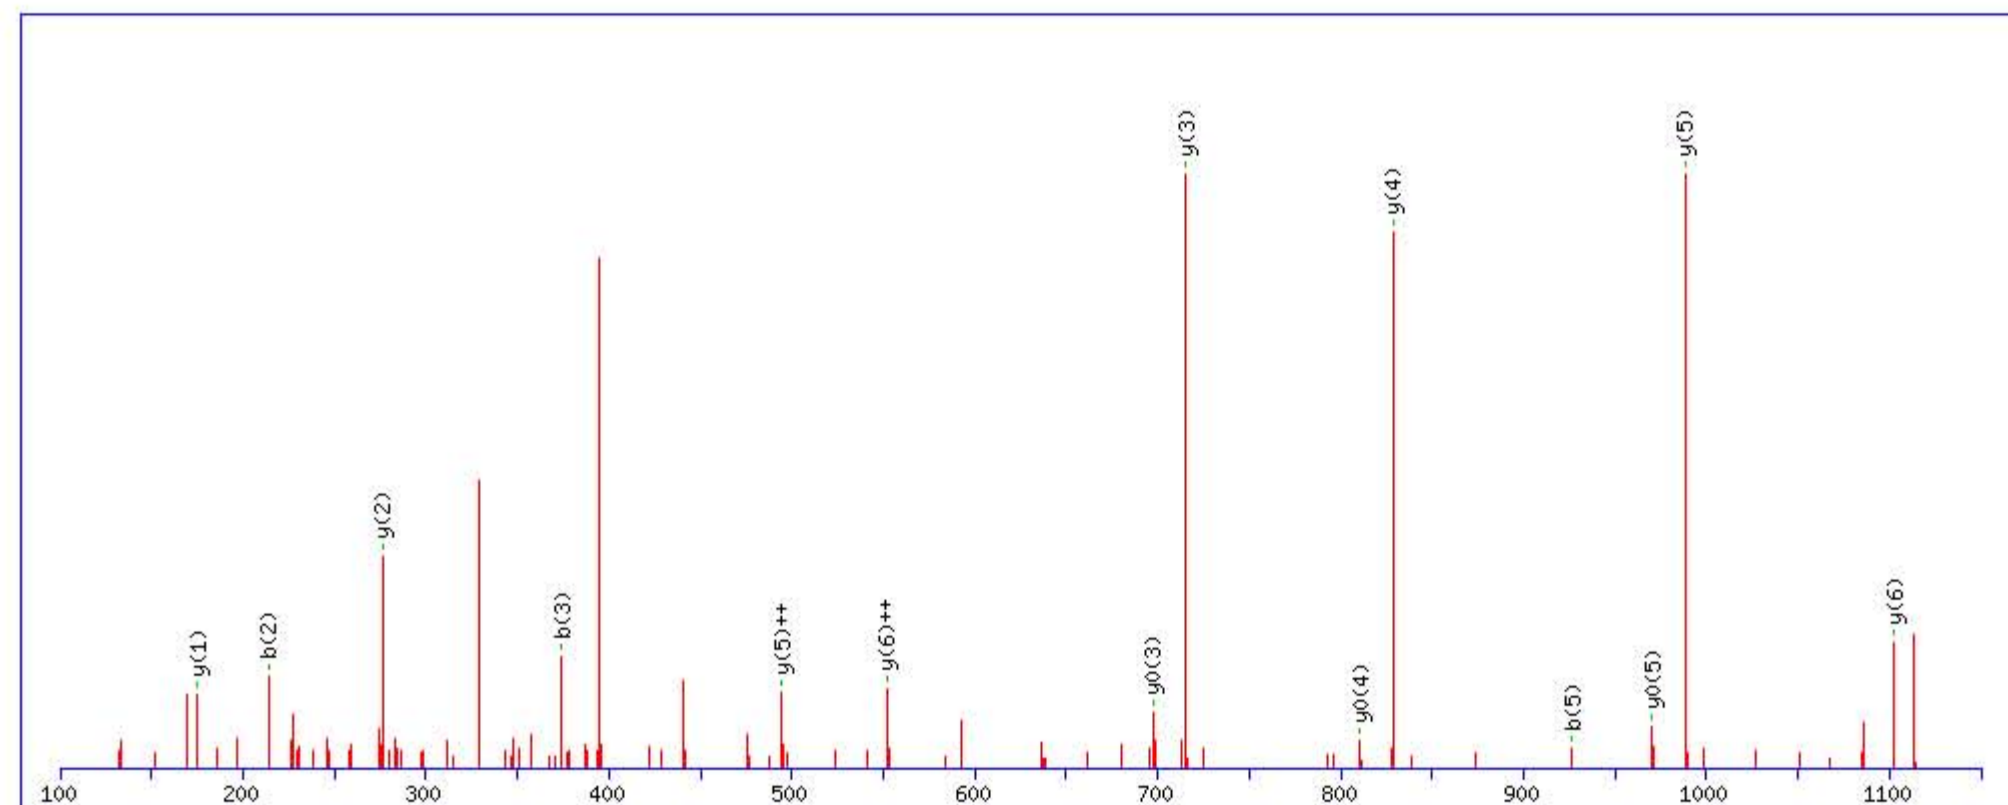

Monoisotopic mass of neutral peptide Mr(calc): 1200.610733

Fixed modifications: Carbamidomethyl (C) (apply to specified residues or termini only)

Variable modifications:

Q5 : Biotin:Thermo-21345 (Q)

Ions Score: 46 Expect: 0.00029

Matches : 14/58 fragment ions using 20 most intense peaks [\(help\)](#)

| # | b                 | b <sup>++</sup> | b <sup>*</sup> | b <sup>*++</sup> | b <sup>0</sup> | b <sup>0++</sup> | Seq. | y                  | y <sup>++</sup>   | y <sup>*</sup> | y <sup>*++</sup> | y <sup>0</sup>    | y <sup>0++</sup> | # |
|---|-------------------|-----------------|----------------|------------------|----------------|------------------|------|--------------------|-------------------|----------------|------------------|-------------------|------------------|---|
| 1 | 100.075690        | 50.541483       |                |                  |                |                  | V    |                    |                   |                |                  |                   |                  | 7 |
| 2 | <b>214.118617</b> | 107.562947      | 197.092068     | 99.049672        |                |                  | N    | <b>1102.549597</b> | <b>551.778437</b> | 1085.523048    | 543.265162       | 1084.539032       | 542.773154       | 6 |
| 3 | <b>374.149266</b> | 187.578271      | 357.122717     | 179.064997       |                |                  | C    | <b>988.506670</b>  | <b>494.756973</b> | 971.480121     | 486.243698       | <b>970.496105</b> | 485.751691       | 5 |
| 4 | 487.233330        | 244.120303      | 470.206781     | 235.607029       |                |                  | L    | <b>828.476021</b>  | 414.741649        | 811.449472     | 406.228374       | <b>810.465456</b> | 405.736366       | 4 |
| 5 | <b>926.458656</b> | 463.732966      | 909.432107     | 455.219692       |                |                  | Q    | <b>715.391957</b>  | 358.199617        | 698.365408     | 349.686342       | <b>697.381392</b> | 349.194334       | 3 |
| 6 | 1027.506335       | 514.256806      | 1010.479786    | 505.743531       | 1009.495770    | 505.251523       | T    | <b>276.166631</b>  | 138.586953        | 259.140082     | 130.073679       | 258.156066        | 129.581671       | 2 |
| 7 |                   |                 |                |                  |                |                  | R    | <b>175.118952</b>  | 88.063114         | 158.092403     | 79.549839        |                   |                  | 1 |

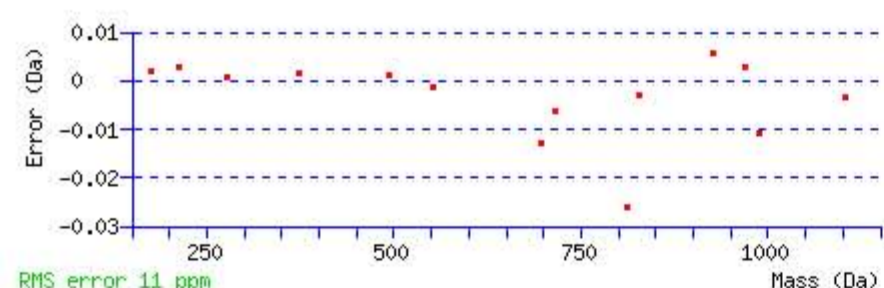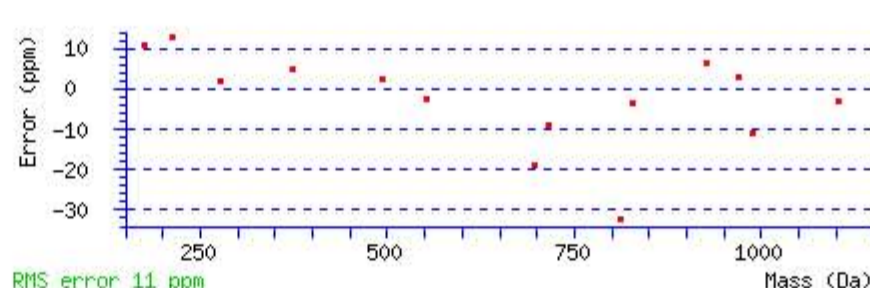

NCBI BLAST search of **VNCLQTR**

(Parameters: blastp, nr protein database, expect=20000, no filter, PAM30)

Other BLAST [web gateways](#)

All matches to this query

| Score | Mr(calc):   | Delta     | Sequence                    |
|-------|-------------|-----------|-----------------------------|
| 46.2  | 1200.610733 | -0.008765 | <a href="#">VNCLQTR</a>     |
| 7.9   | 1200.603333 | -0.001365 | <a href="#">VMSKSGHSNVR</a> |
| 6.1   | 1200.603333 | -0.001365 | <a href="#">GRIAEPSVCGR</a> |
| 4.2   | 1200.607361 | -0.005393 | <a href="#">RGDYVHVMPK</a>  |
| 3.4   | 1200.617233 | -0.015265 | <a href="#">VMEETPNLR</a>   |
| 1.0   | 1200.611191 | -0.009223 | <a href="#">HDSLAKHTR</a>   |
| 0.6   | 1200.592087 | 0.009881  | <a href="#">SATEQQAR</a>    |

Mascot: <http://www.matrixscience.com/>



# MASCOT SCIENCE Mascot Search Results

## Peptide View

MS/MS Fragmentation of **MVQQECK**

Found in **AFAM\_HUMAN**, Afamin OS=Homo sapiens GN=AFM PE=1 SV=1

Match to Query 18474: 1232.568648 from(617.291600,2+) rtinseconds(1380) index(15088)

Title: Locus:1.1.1.3046.14 File:"2013-07-02 CLN FXIII 180 min 3rd F 2.wiff"

Data file C:\Program Files (x86)\Matrix Science\Mascot Daemon\mgf\9 FXIII 180 min 3rd\mascot\_daemon\_merge.mgf

Click mouse within plot area to zoom in by factor of two about that point

Or, Plot from  to  Da

Label all possible matches  Label matches used for scoring

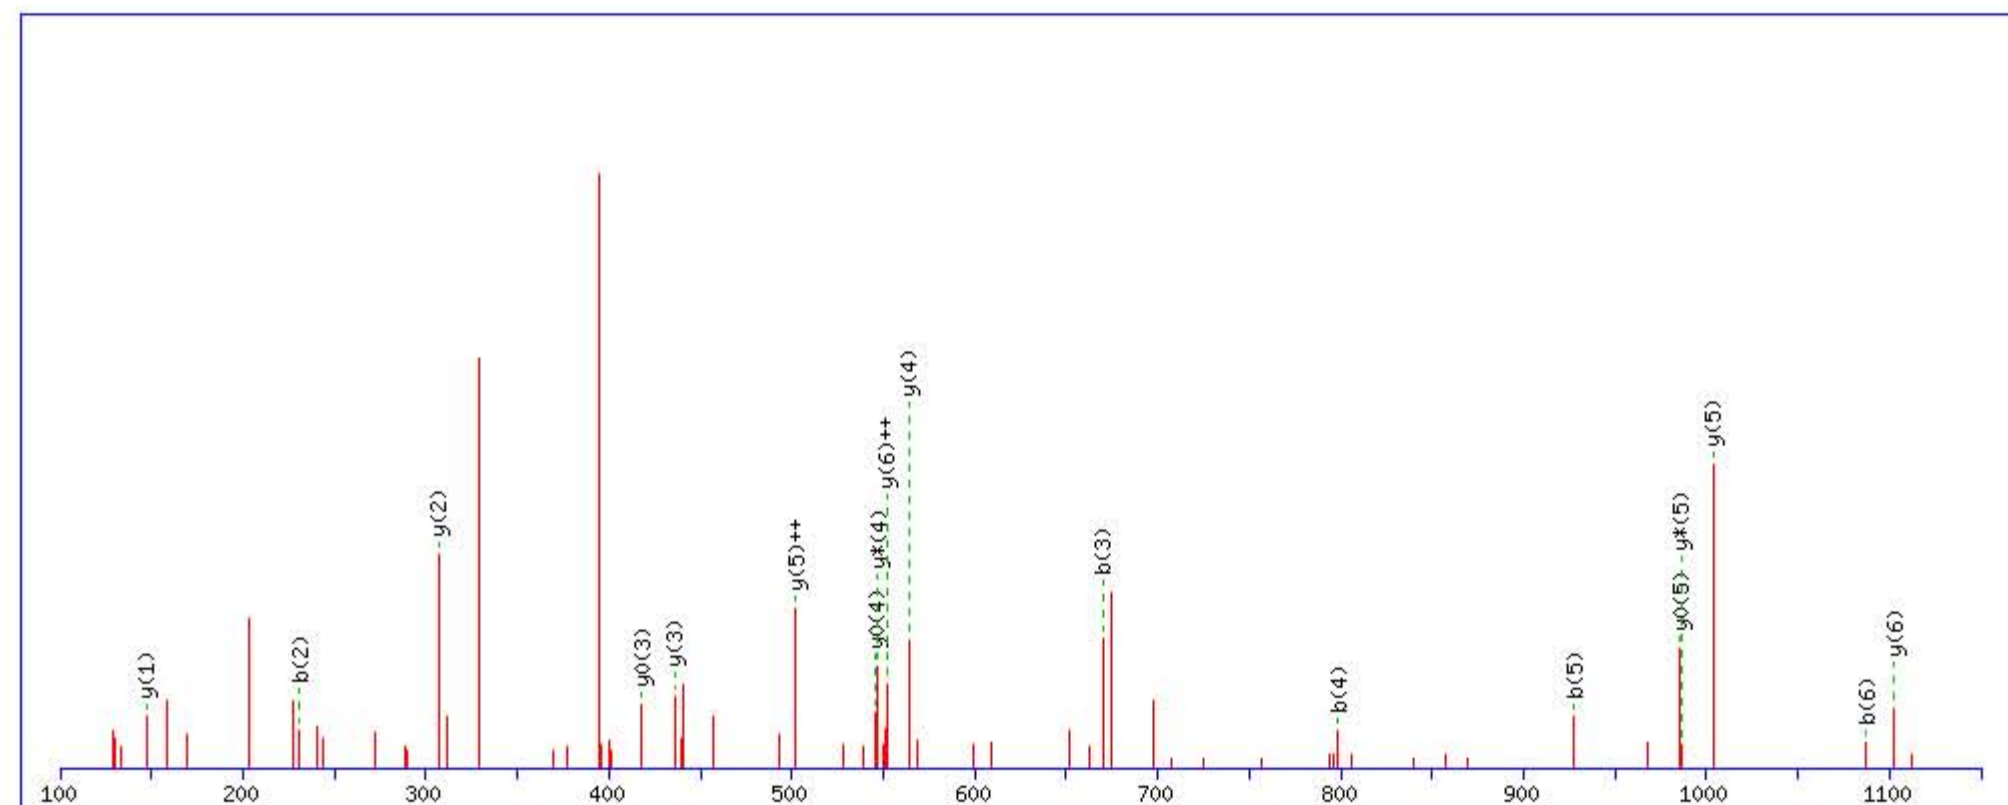

Monoisotopic mass of neutral peptide  $M_r(\text{calc})$ : 1232.571564

Fixed modifications: Carbamidomethyl (C) (apply to specified residues or termini only)

Variable modifications:

Q3 : Biotin:Thermo-21345 (Q)

Ions Score: 26 Expect: 0.012

Matches : 18/56 fragment ions using 39 most intense peaks ([help](#))

| # | b                  | b <sup>++</sup> | b <sup>*</sup> | b <sup>*++</sup> | b <sup>0</sup> | b <sup>0++</sup> | Seq. | y                  | y <sup>++</sup>   | y <sup>*</sup>    | y <sup>*++</sup> | y <sup>0</sup>    | y <sup>0++</sup> | # |
|---|--------------------|-----------------|----------------|------------------|----------------|------------------|------|--------------------|-------------------|-------------------|------------------|-------------------|------------------|---|
| 1 | 132.047761         | 66.527518       |                |                  |                |                  | M    |                    |                   |                   |                  |                   |                  | 7 |
| 2 | <b>231.116175</b>  | 116.061725      |                |                  |                |                  | V    | <b>1102.538364</b> | <b>551.772820</b> | 1085.511815       | 543.259546       | 1084.527799       | 542.767538       | 6 |
| 3 | <b>670.341501</b>  | 335.674389      | 653.314952     | 327.161114       |                |                  | Q    | <b>1003.469950</b> | <b>502.238613</b> | <b>986.443401</b> | 493.725339       | <b>985.459385</b> | 493.233331       | 5 |
| 4 | <b>798.400079</b>  | 399.703678      | 781.373530     | 391.190403       |                |                  | Q    | <b>564.244624</b>  | 282.625950        | <b>547.218075</b> | 274.112676       | <b>546.234059</b> | 273.620668       | 4 |
| 5 | <b>927.442672</b>  | 464.224974      | 910.416123     | 455.711700       | 909.432107     | 455.219692       | E    | <b>436.186046</b>  | 218.596661        | 419.159497        | 210.083387       | <b>418.175481</b> | 209.591379       | 3 |
| 6 | <b>1087.473321</b> | 544.240299      | 1070.446772    | 535.727024       | 1069.462756    | 535.235016       | C    | <b>307.143453</b>  | 154.075365        | 290.116904        | 145.562090       |                   |                  | 2 |
| 7 |                    |                 |                |                  |                |                  | K    | <b>147.112804</b>  | 74.060040         | 130.086255        | 65.546765        |                   |                  | 1 |

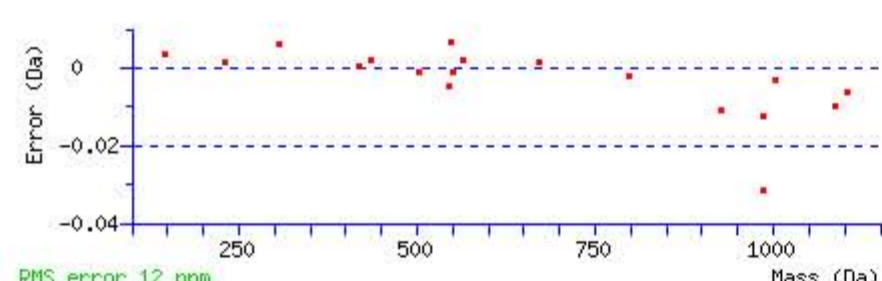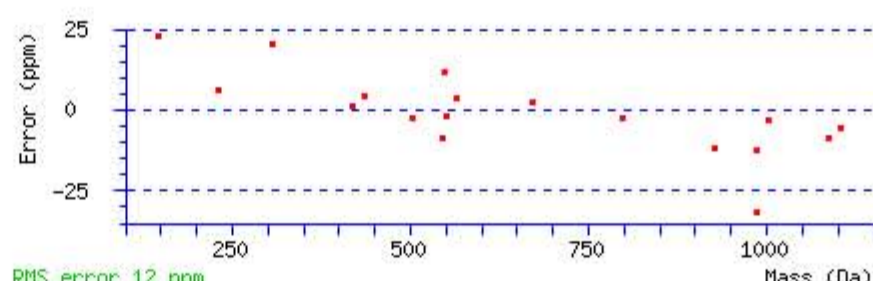

NCBI BLAST search of **MVQQECK**

(Parameters: blastp, nr protein database, expect=20000, no filter, PAM30)

Other BLAST [web gateways](#)

### All matches to this query

| Score | $M_r(\text{calc})$ : | Delta     | Sequence                     |
|-------|----------------------|-----------|------------------------------|
| 25.6  | 1232.571564          | -0.002916 | <a href="#">MVQQECK</a>      |
| 14.4  | 1232.571564          | -0.002916 | <a href="#">MVQQECK</a>      |
| 5.0   | 1232.570694          | -0.002046 | <a href="#">QDDKSSDK</a>     |
| 1.9   | 1232.570679          | -0.002031 | <a href="#">ENVPASSLCEK</a>  |
| 1.8   | 1232.564163          | 0.004485  | <a href="#">EPQRGMGSMMPK</a> |
| 1.2   | 1232.556091          | 0.012557  | <a href="#">ETPPSFPECDK</a>  |
| 0.2   | 1232.564163          | 0.004485  | <a href="#">EPQRGMGSMMPK</a> |

Mascot: <http://www.matrixscience.com/>

# MASCOT SEARCH RESULTS

## Peptide View

MS/MS Fragmentation of **MVQQECK**

Found in **AFAM\_HUMAN**, Afamin OS=Homo sapiens GN=AFM PE=1 SV=1

Match to Query 18927: 1248.568408 from(625.291480,2+) rtinseconds(1281) index(784)

Title: Locus:1.1.1.2965.8 File:"2013-07-02 CLN FXIII 180 min 3rd F 1.wiff"

Data file C:\Program Files (x86)\Matrix Science\Mascot Daemon\mgf9 FXIII 180 min 3rd\mascot\_daemon\_merge.mgf

Click mouse within plot area to zoom in by factor of two about that point

Or, Plot from  to  Da

Label all possible matches  Label matches used for scoring

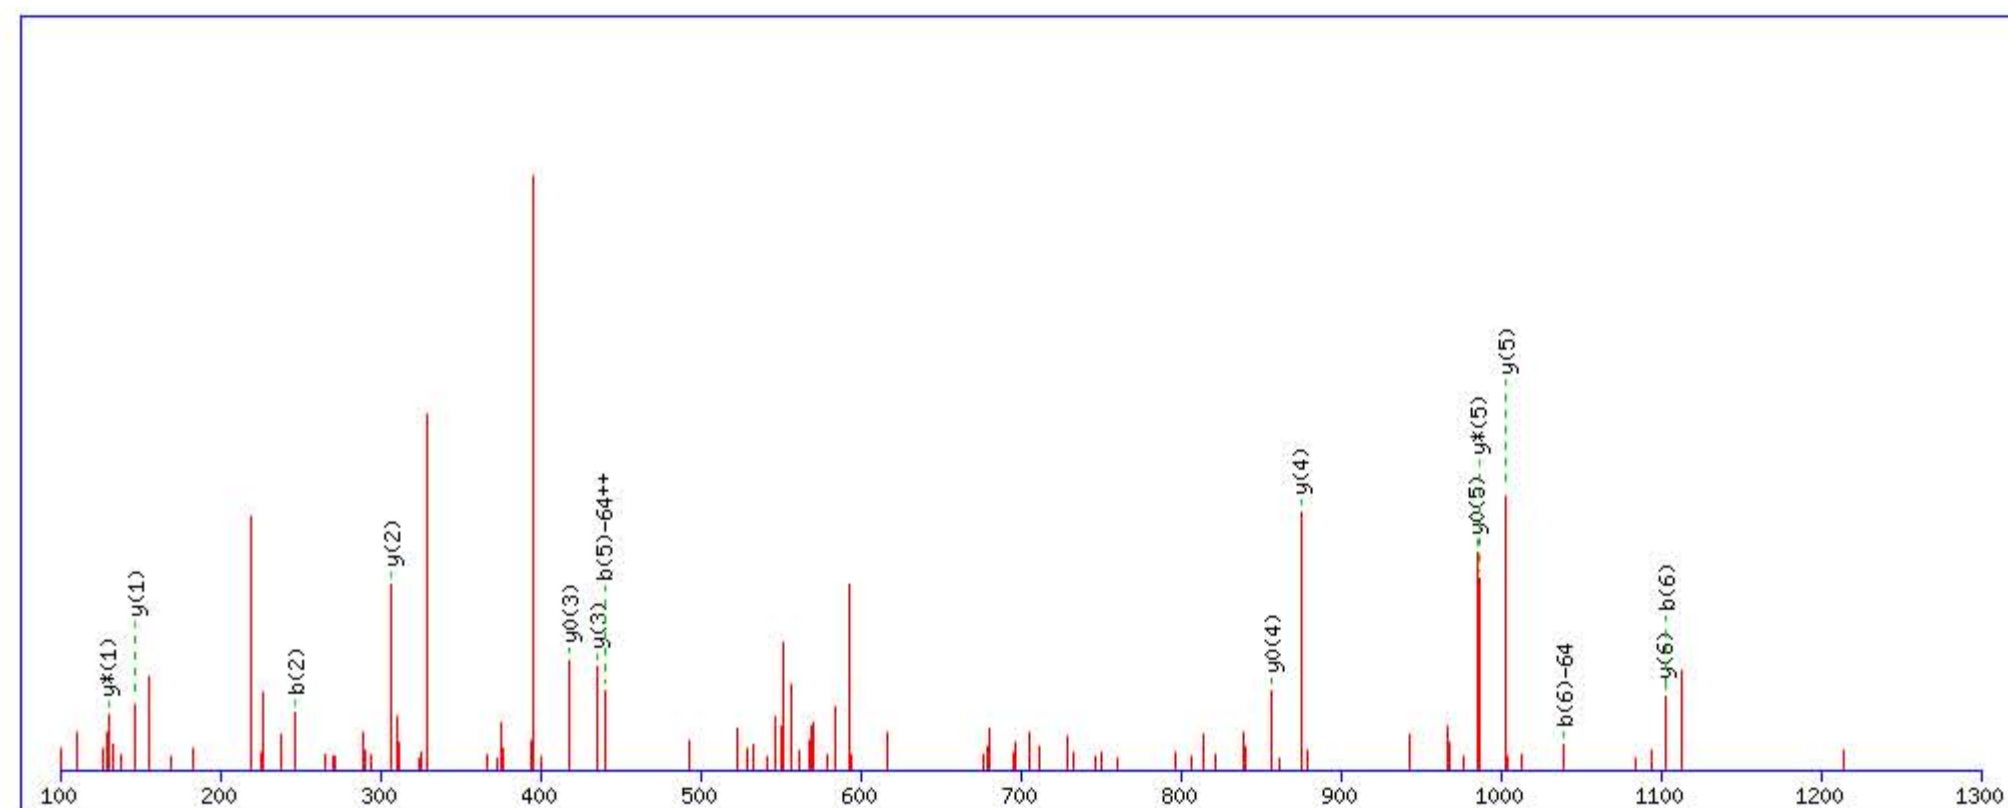

Monoisotopic mass of neutral peptide Mr(calc): 1248.566483

Fixed modifications: Carbamidomethyl (C) (apply to specified residues or termini only)

Variable modifications:

M1 : Oxidation (M), with neutral losses 0.000000 (shown in table), 63.998285

Q4 : Biotin:Thermo-21345 (Q)

Ions Score: 29 Expect: 0.0044

Matches : 15/80 fragment ions using 34 most intense peaks [\(help\)](#)

| # | b                  | b <sup>++</sup> | b <sup>*</sup> | b <sup>*++</sup> | b <sup>0</sup> | b <sup>0++</sup> | Seq. | y                  | y <sup>++</sup> | y <sup>*</sup>    | y <sup>*++</sup> | y <sup>0</sup>    | y <sup>0++</sup> | # |
|---|--------------------|-----------------|----------------|------------------|----------------|------------------|------|--------------------|-----------------|-------------------|------------------|-------------------|------------------|---|
| 1 | 148.042676         | 74.524976       |                |                  |                |                  | M    |                    |                 |                   |                  |                   |                  | 7 |
| 2 | <b>247.111090</b>  | 124.059183      |                |                  |                |                  | V    | <b>1102.538364</b> | 551.772820      | 1085.511815       | 543.259546       | 1084.527799       | 542.767538       | 6 |
| 3 | 375.169668         | 188.088472      | 358.143119     | 179.575198       |                |                  | Q    | <b>1003.469950</b> | 502.238613      | <b>986.443401</b> | 493.725338       | <b>985.459385</b> | 493.233330       | 5 |
| 4 | 814.394994         | 407.701135      | 797.368445     | 399.187861       |                |                  | Q    | <b>875.411372</b>  | 438.209324      | 858.384823        | 429.696050       | <b>857.400807</b> | 429.204042       | 4 |
| 5 | 943.437587         | 472.222432      | 926.411038     | 463.709157       | 925.427022     | 463.217149       | E    | <b>436.186046</b>  | 218.596661      | 419.159497        | 210.083386       | <b>418.175481</b> | 209.591378       | 3 |
| 6 | <b>1103.468236</b> | 552.237756      | 1086.441687    | 543.724482       | 1085.457671    | 543.232473       | C    | <b>307.143453</b>  | 154.075364      | 290.116904        | 145.562090       |                   |                  | 2 |
| 7 |                    |                 |                |                  |                |                  | K    | <b>147.112804</b>  | 74.060040       | <b>130.086255</b> | 65.546765        |                   |                  | 1 |

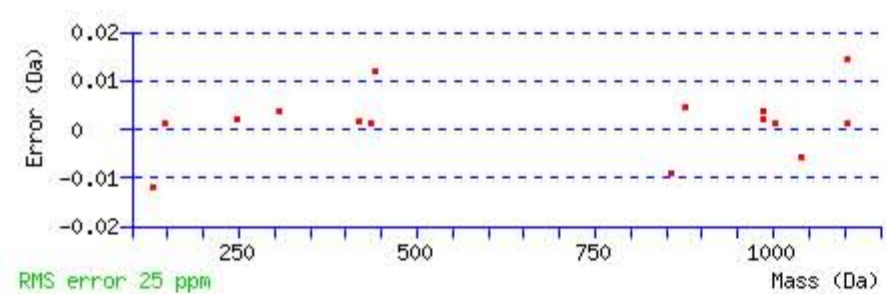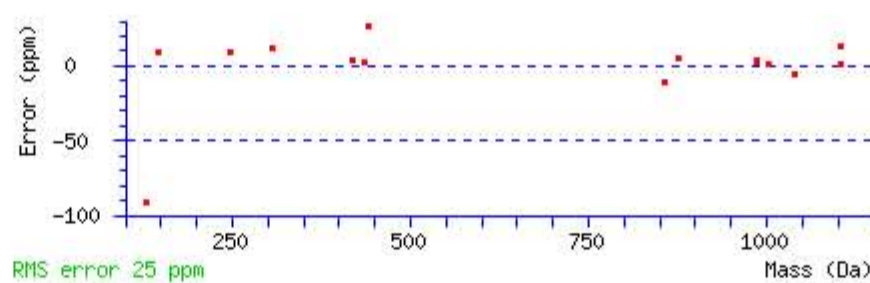

NCBI BLAST search of **MVQQECK**

(Parameters: blastp, nr protein database, expect=20000, no filter, PAM30)

Other BLAST [web gateways](#)

All matches to this query

| Score | Mr(calc):   | Delta     | Sequence                    |
|-------|-------------|-----------|-----------------------------|
| 29.5  | 1248.566483 | 0.001925  | <a href="#">MVQQECK</a>     |
| 18.5  | 1248.566483 | 0.001925  | <a href="#">MVQQECK</a>     |
| 4.2   | 1248.576813 | -0.008405 | <a href="#">KCESLEQEAR</a>  |
| 1.8   | 1248.569611 | -0.001203 | <a href="#">MYEVYDAKSK</a>  |
| 0.7   | 1248.584244 | -0.015836 | <a href="#">MHSMISSVDVK</a> |

Mascot: <http://www.matrixscience.com/>

# MASCOT SCIENCE Mascot Search Results

## Peptide View

MS/MS Fragmentation of **CQAYESNR**

Found in **AFAM\_HUMAN**, Afamin OS=Homo sapiens GN=AFM PE=1 SV=1

Match to Query 21073: 1337.586408 from(669.800480,2+) rtinseconds(1439) index(1573)

Title: Locus:1.1.1.3020.16 File:"2013-07-02 CLN FXIII 180 min 3rd F 1.wiff"

Data file C:\Program Files (x86)\Matrix Science\Mascot Daemon\mgf\9 FXIII 180 min 3rd\mascot\_daemon\_merge.mgf

Click mouse within plot area to zoom in by factor of two about that point

Or, Plot from  to  Da

Label all possible matches  Label matches used for scoring

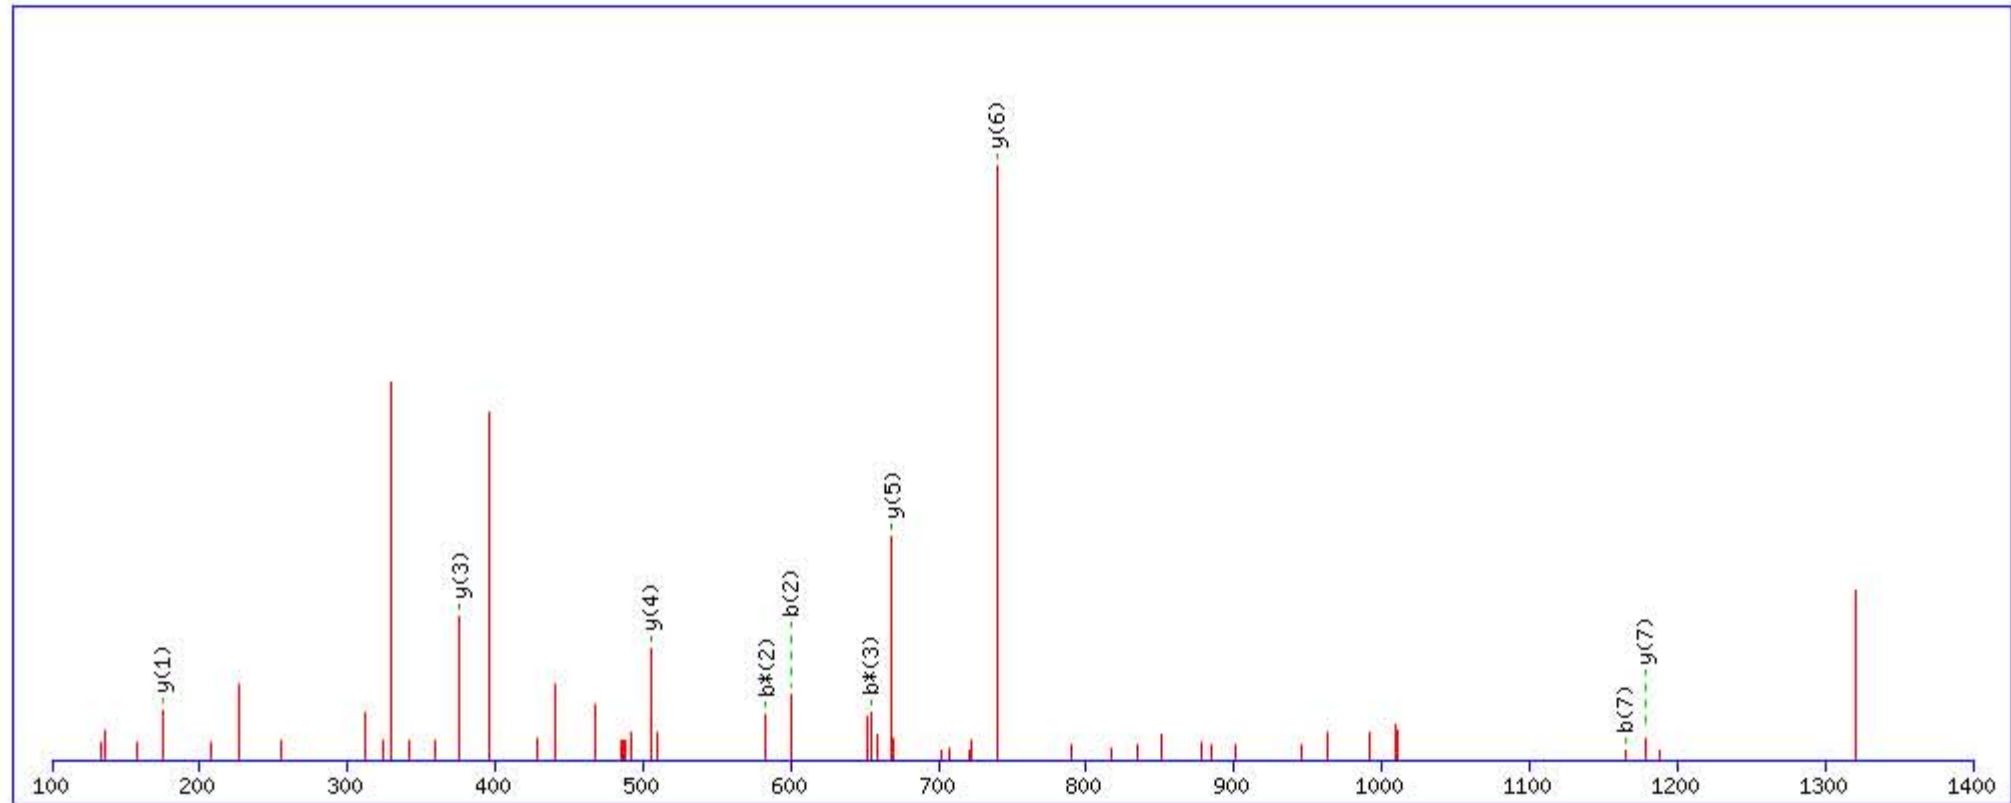

Monoisotopic mass of neutral peptide Mr(calc): 1337.585617

Fixed modifications: Carbamidomethyl (C) (apply to specified residues or termini only)

Variable modifications:

Q2 : Biotin:Thermo-21345 (Q)

Ions Score: 33 Expect: 0.0025

Matches : 10/70 fragment ions using 21 most intense peaks ([help](#))

| # | b                  | b <sup>++</sup> | b <sup>*</sup>    | b <sup>***</sup> | b <sup>0</sup> | b <sup>0++</sup> | Seq. | y                  | y <sup>++</sup> | y <sup>*</sup> | y <sup>***</sup> | y <sup>0</sup> | y <sup>0++</sup> | # |
|---|--------------------|-----------------|-------------------|------------------|----------------|------------------|------|--------------------|-----------------|----------------|------------------|----------------|------------------|---|
| 1 | 161.037925         | 81.022600       |                   |                  |                |                  | C    |                    |                 |                |                  |                |                  | 8 |
| 2 | <b>600.263251</b>  | 300.635264      | <b>583.236702</b> | 292.121989       |                |                  | Q    | <b>1178.562269</b> | 589.784773      | 1161.535720    | 581.271498       | 1160.551704    | 580.779490       | 7 |
| 3 | 671.300365         | 336.153821      | <b>654.273816</b> | 327.640546       |                |                  | A    | <b>739.336943</b>  | 370.172110      | 722.310394     | 361.658835       | 721.326378     | 361.166827       | 6 |
| 4 | 834.363694         | 417.685485      | 817.337145        | 409.172211       |                |                  | Y    | <b>668.299829</b>  | 334.653553      | 651.273280     | 326.140278       | 650.289264     | 325.648270       | 5 |
| 5 | 963.406287         | 482.206782      | 946.379738        | 473.693507       | 945.395722     | 473.201499       | E    | <b>505.236500</b>  | 253.121888      | 488.209951     | 244.608613       | 487.225935     | 244.116605       | 4 |
| 6 | 1050.438315        | 525.722796      | 1033.411766       | 517.209521       | 1032.427750    | 516.717513       | S    | <b>376.193907</b>  | 188.600591      | 359.167358     | 180.087317       | 358.183342     | 179.595309       | 3 |
| 7 | <b>1164.481242</b> | 582.744259      | 1147.454693       | 574.230985       | 1146.470677    | 573.738977       | N    | 289.161879         | 145.084577      | 272.135330     | 136.571303       |                |                  | 2 |
| 8 |                    |                 |                   |                  |                |                  | R    | <b>175.118952</b>  | 88.063114       | 158.092403     | 79.549839        |                |                  | 1 |

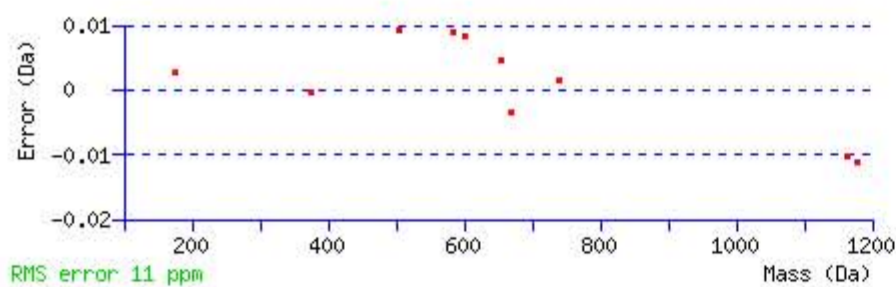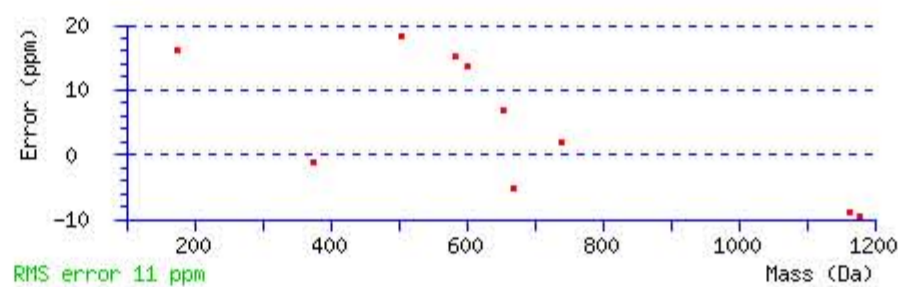

NCBI BLAST search of **CQAYESNR**

(Parameters: blastp, nr protein database, expect=20000, no filter, PAM30)

Other BLAST [web gateways](#)

All matches to this query

| Score | Mr(calc):   | Delta     | Sequence                      |
|-------|-------------|-----------|-------------------------------|
| 33.2  | 1337.585617 | 0.000791  | <a href="#">CQAYESNR</a>      |
| 12.2  | 1337.596848 | -0.010440 | <a href="#">CYEMASHLRR</a>    |
| 0.5   | 1337.599365 | -0.012957 | <a href="#">SSGSSPAMETRGR</a> |

# MASCOT Search Results

## Peptide View

MS/MS Fragmentation of **LPNNVLQEK**

Found in **AFAM\_HUMAN**, Afamin OS=Homo sapiens GN=AFM PE=1 SV=1

Match to Query 22507: 1364.756528 from(683.385540,2+) rtinseconds(1925) index(4356)

Title: Locus:1.1.1.3190.12 File:"2013-07-02 CLN FXIII 180 min 3rd F 1.wiff"

Data file C:\Program Files (x86)\Matrix Science\Mascot Daemon\mgf\9 FXIII 180 min 3rd\mascot\_daemon\_merge.mgf

Click mouse within plot area to zoom in by factor of two about that point

Or, Plot from  to  Da

Label all possible matches  Label matches used for scoring

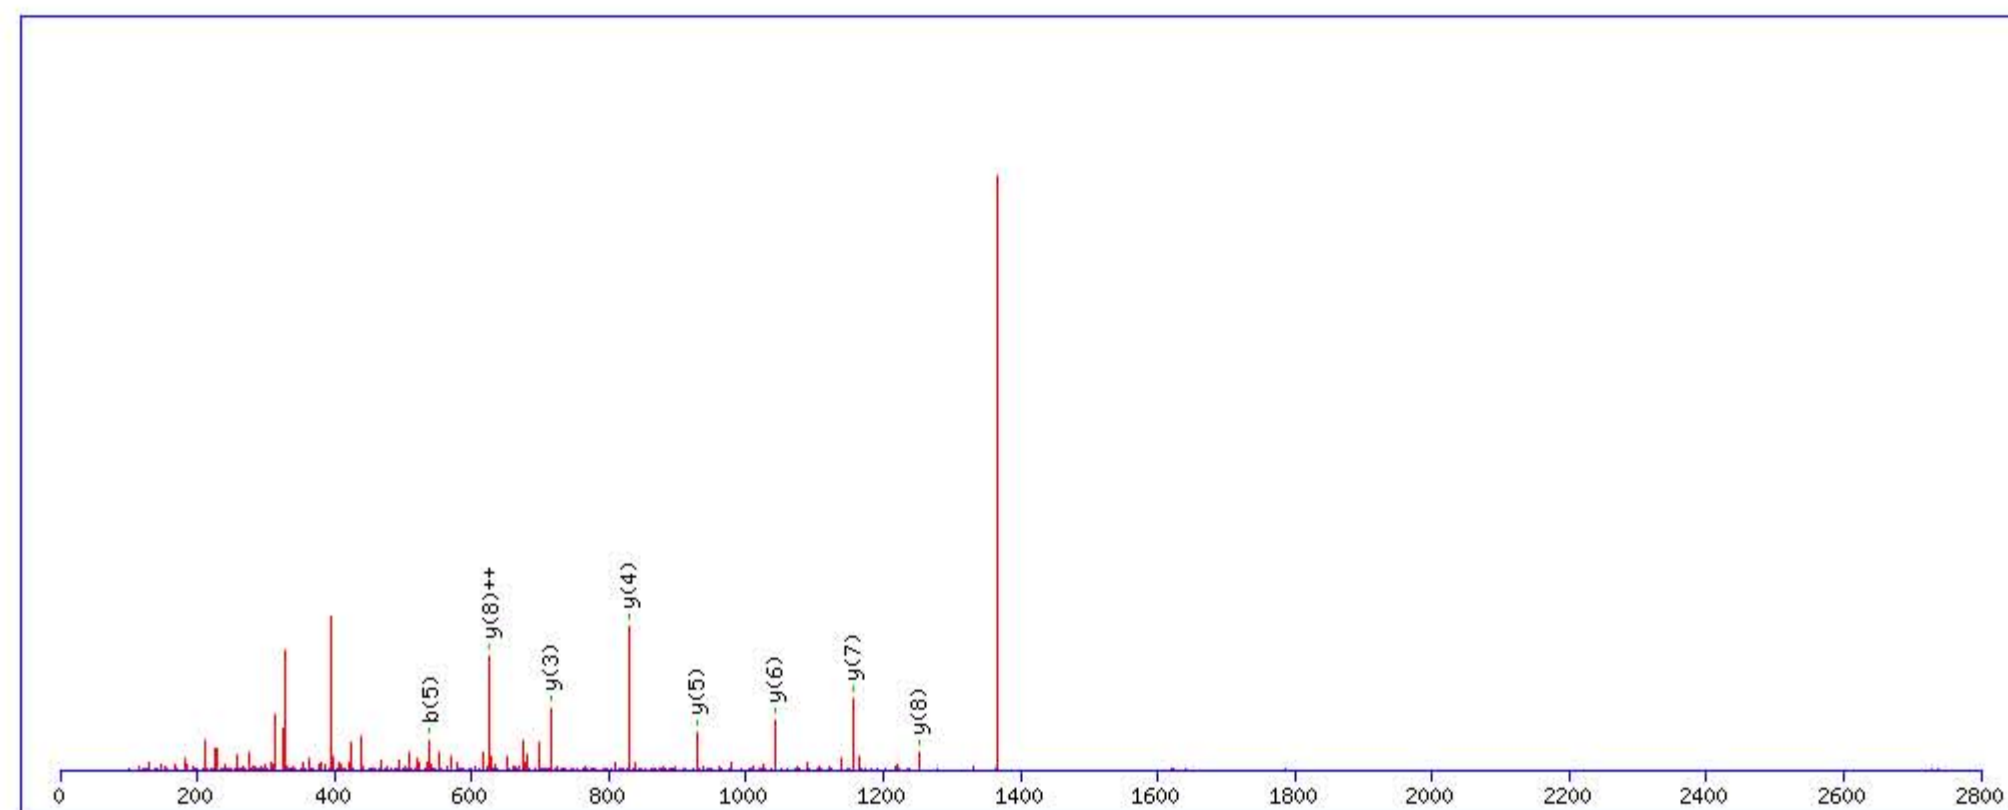

Monoisotopic mass of neutral peptide Mr(calc): 1364.748581

Fixed modifications: Carbamidomethyl (C) (apply to specified residues or termini only)

Variable modifications:

Q7 : Biotin:Thermo-21345 (Q)

Ions Score: 42 Expect: 0.00099

Matches : 8/76 fragment ions using 13 most intense peaks [\(help\)](#)

| # | b           | b <sup>++</sup> | b <sup>*</sup> | b <sup>*++</sup> | b <sup>0</sup> | b <sup>0++</sup> | Seq. | y           | y <sup>++</sup> | y <sup>*</sup> | y <sup>*++</sup> | y <sup>0</sup> | y <sup>0++</sup> | # |
|---|-------------|-----------------|----------------|------------------|----------------|------------------|------|-------------|-----------------|----------------|------------------|----------------|------------------|---|
| 1 | 114.091340  | 57.549308       |                |                  |                |                  | L    |             |                 |                |                  |                |                  | 9 |
| 2 | 211.144104  | 106.075690      |                |                  |                |                  | P    | 1252.671819 | 626.839548      | 1235.645270    | 618.326273       | 1234.661254    | 617.834265       | 8 |
| 3 | 325.187031  | 163.097153      | 308.160482     | 154.583879       |                |                  | N    | 1155.619055 | 578.313166      | 1138.592506    | 569.799891       | 1137.608490    | 569.307883       | 7 |
| 4 | 439.229958  | 220.118617      | 422.203409     | 211.605343       |                |                  | N    | 1041.576128 | 521.291702      | 1024.549579    | 512.778428       | 1023.565563    | 512.286420       | 6 |
| 5 | 538.298372  | 269.652824      | 521.271823     | 261.139550       |                |                  | V    | 927.533201  | 464.270239      | 910.506652     | 455.756964       | 909.522636     | 455.264956       | 5 |
| 6 | 651.382436  | 326.194856      | 634.355887     | 317.681582       |                |                  | L    | 828.464787  | 414.736032      | 811.438238     | 406.222757       | 810.454222     | 405.730749       | 4 |
| 7 | 1090.607762 | 545.807519      | 1073.581213    | 537.294245       |                |                  | Q    | 715.380723  | 358.194000      | 698.354174     | 349.680725       | 697.370158     | 349.188717       | 3 |
| 8 | 1219.650355 | 610.328816      | 1202.623806    | 601.815541       | 1201.639790    | 601.323533       | E    | 276.155397  | 138.581336      | 259.128848     | 130.068062       | 258.144832     | 129.576054       | 2 |
| 9 |             |                 |                |                  |                |                  | K    | 147.112804  | 74.060040       | 130.086255     | 65.546765        |                |                  | 1 |

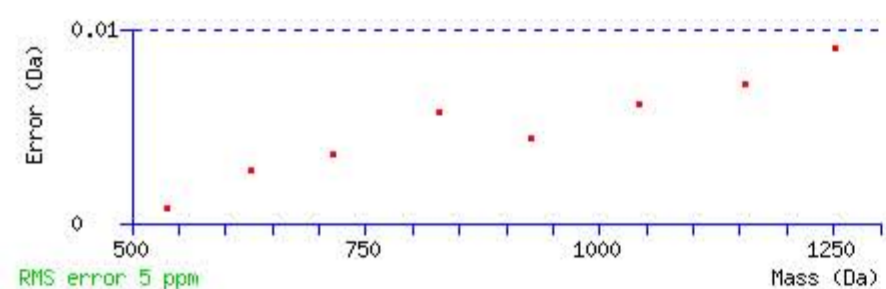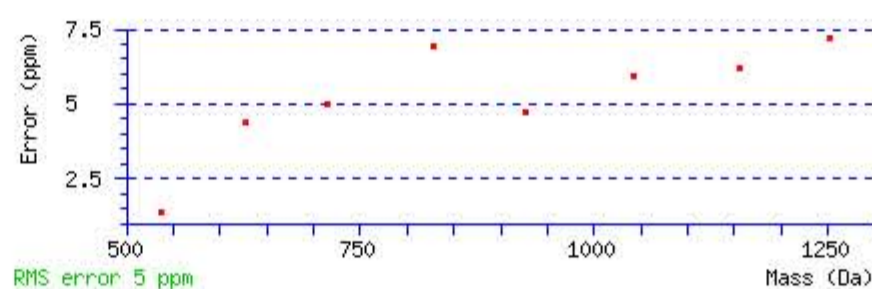

NCBI BLAST search of **LPNNVLQEK**

(Parameters: blastp, nr protein database, expect=20000, no filter, PAM30)

Other BLAST [web gateways](#)

## All matches to this query

| Score | Mr(calc):   | Delta     | Sequence                    |
|-------|-------------|-----------|-----------------------------|
| 41.9  | 1364.748581 | 0.007947  | <a href="#">LPNNVLQEK</a>   |
| 9.3   | 1364.745239 | 0.011289  | <a href="#">KVVSVIDVYTR</a> |
| 7.0   | 1364.759827 | -0.003299 | <a href="#">QTSSLIHR</a>    |
| 4.4   | 1364.771240 | -0.014712 | <a href="#">IFQKLMFK</a>    |
| 4.0   | 1364.752609 | 0.003919  | <a href="#">KQFLDYLK</a>    |
| 1.1   | 1364.742065 | 0.014463  | <a href="#">LQMQLHLR</a>    |

# MASCOT SCIENCE Mascot Search Results

## Peptide View

MS/MS Fragmentation of **FTDSENVQER**

Found in **AFAM\_HUMAN**, Afamin OS=Homo sapiens GN=AFM PE=1 SV=1

Match to Query 33535: 1694.738652 from(565.920160,3+) rtinseconds(1648) index(2918)

Title: Locus:1.1.1.3093.16 File:"2013-07-02 CLN FXIII 180 min 3rd F 1.wiff"

Data file C:\Program Files (x86)\Matrix Science\Mascot Daemon\mgf9 FXIII 180 min 3rd\mascot\_daemon\_merge.mgf

Click mouse within plot area to zoom in by factor of two about that point

Or, Plot from  to  Da

Label all possible matches  Label matches used for scoring

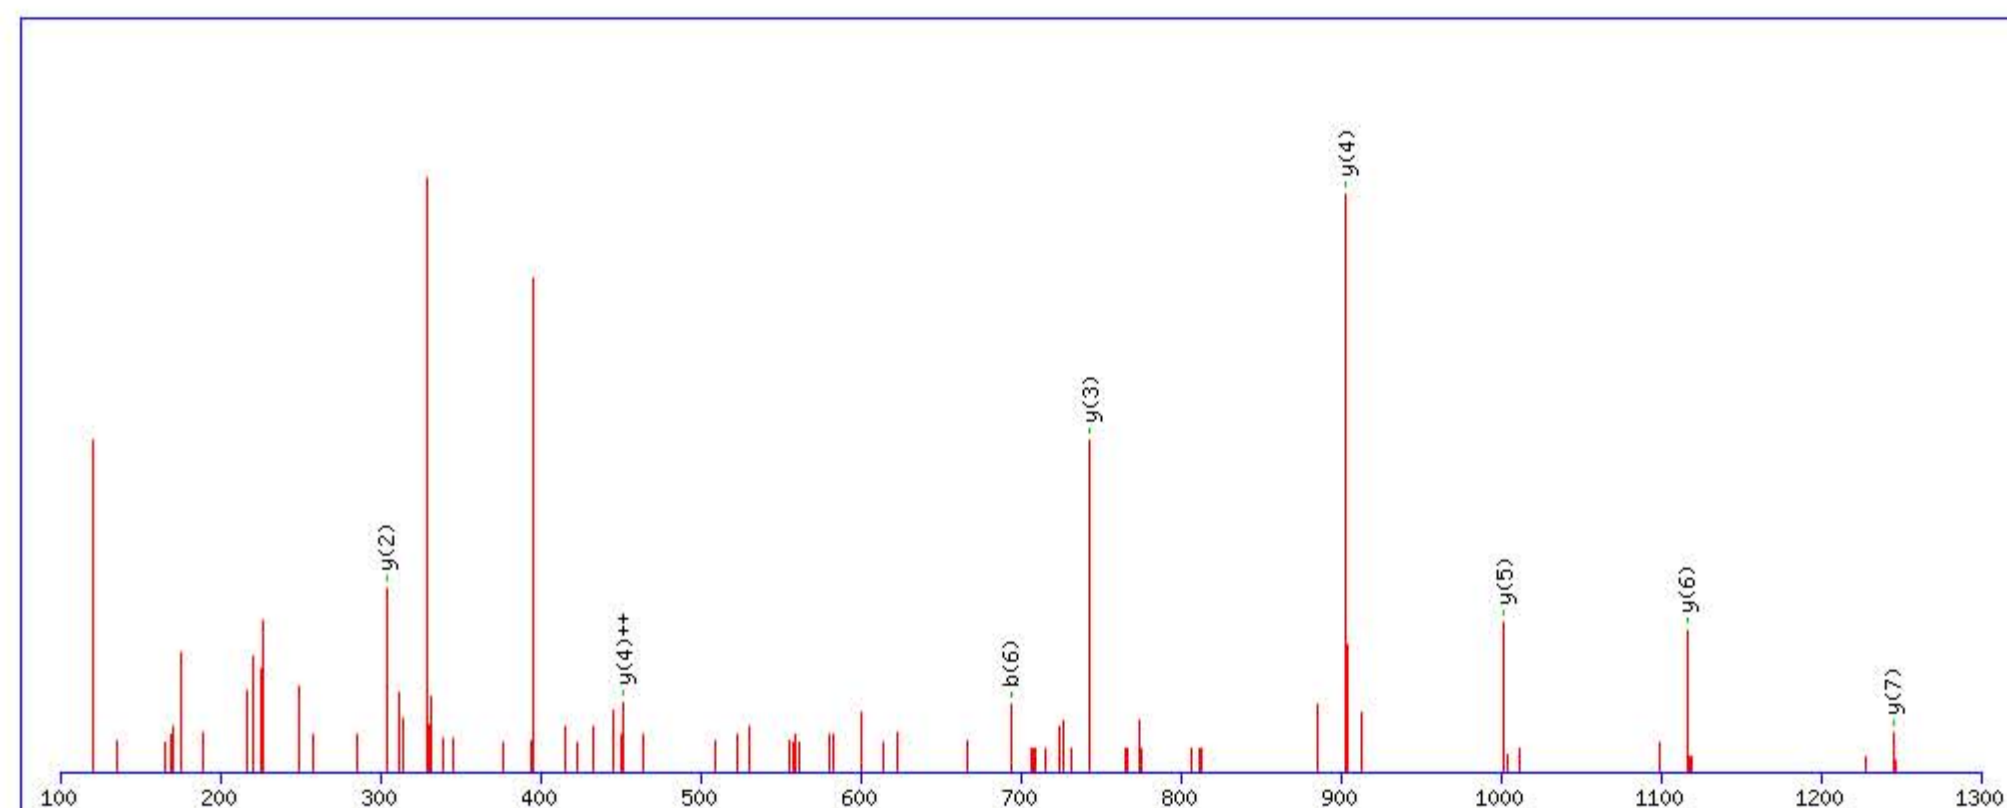

Monoisotopic mass of neutral peptide  $M_r(\text{calc})$ : 1694.739243

Fixed modifications: Carbamidomethyl (C) (apply to specified residues or termini only)

Variable modifications:

Q9 : Biotin:Thermo-21345 (Q)

Ions Score: 41 Expect: 0.00038

Matches : 8/106 fragment ions using 11 most intense peaks [\(help\)](#)

| #  | b                 | b <sup>++</sup> | b <sup>*</sup> | b <sup>*++</sup> | b <sup>0</sup> | b <sup>0++</sup> | Seq. | y                  | y <sup>++</sup>   | y <sup>*</sup> | y <sup>*++</sup> | y <sup>0</sup> | y <sup>0++</sup> | #  |
|----|-------------------|-----------------|----------------|------------------|----------------|------------------|------|--------------------|-------------------|----------------|------------------|----------------|------------------|----|
| 1  | 148.075690        | 74.541483       |                |                  |                |                  | F    |                    |                   |                |                  |                |                  | 11 |
| 2  | 249.123369        | 125.065322      |                |                  | 231.112804     | 116.060040       | T    | 1548.678104        | 774.842690        | 1531.651555    | 766.329416       | 1530.667539    | 765.837408       | 10 |
| 3  | 364.150312        | 182.578794      |                |                  | 346.139747     | 173.573512       | D    | 1447.630425        | 724.318851        | 1430.603876    | 715.805576       | 1429.619860    | 715.313568       | 9  |
| 4  | 451.182340        | 226.094808      |                |                  | 433.171775     | 217.089526       | S    | 1332.603482        | 666.805379        | 1315.576933    | 658.292105       | 1314.592917    | 657.800097       | 8  |
| 5  | 580.224933        | 290.616105      |                |                  | 562.214368     | 281.610822       | E    | <b>1245.571454</b> | 623.289365        | 1228.544905    | 614.776091       | 1227.560889    | 614.284083       | 7  |
| 6  | <b>694.267860</b> | 347.637568      | 677.241311     | 339.124294       | 676.257295     | 338.632286       | N    | <b>1116.528861</b> | 558.768069        | 1099.502312    | 550.254794       | 1098.518296    | 549.762786       | 6  |
| 7  | 793.336274        | 397.171775      | 776.309725     | 388.658501       | 775.325709     | 388.166493       | V    | <b>1002.485934</b> | 501.746605        | 985.459385     | 493.233331       | 984.475369     | 492.741323       | 5  |
| 8  | 953.366923        | 477.187100      | 936.340374     | 468.673825       | 935.356358     | 468.181817       | C    | <b>903.417520</b>  | <b>452.212398</b> | 886.390971     | 443.699124       | 885.406955     | 443.207116       | 4  |
| 9  | 1392.592249       | 696.799763      | 1375.565700    | 688.286488       | 1374.581684    | 687.794480       | Q    | <b>743.386871</b>  | 372.197074        | 726.360322     | 363.683799       | 725.376306     | 363.191791       | 3  |
| 10 | 1521.634842       | 761.321059      | 1504.608293    | 752.807785       | 1503.624277    | 752.315777       | E    | <b>304.161545</b>  | 152.584411        | 287.134996     | 144.071136       | 286.150980     | 143.579128       | 2  |
| 11 |                   |                 |                |                  |                |                  | R    | 175.118952         | 88.063114         | 158.092403     | 79.549839        |                |                  | 1  |

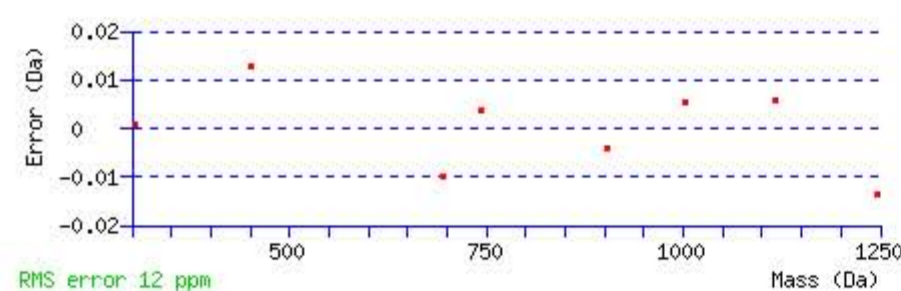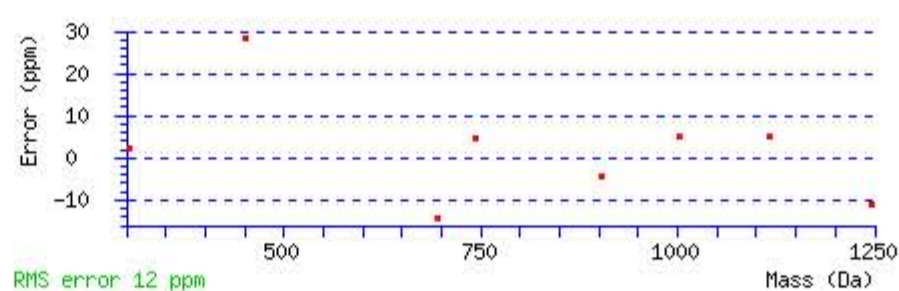

NCBI BLAST search of [FTDSENVQER](#)

(Parameters: blastp, nr protein database, expect=20000, no filter, PAM30)

Other BLAST [web gateways](#)

All matches to this query

| Score | $M_r(\text{calc})$ : | Delta     | Sequence                   |
|-------|----------------------|-----------|----------------------------|
| 40.9  | 1694.739243          | -0.000591 | <a href="#">FTDSENVQER</a> |

Mascot: <http://www.matrixscience.com/>

# MASCOT Search Results

## Peptide View

MS/MS Fragmentation of **GQCIINSNKDDRPK**

Found in **AFAM\_HUMAN**, Afamin OS=Homo sapiens GN=AFM PE=1 SV=1

Match to Query 38433: 1954.967376 from(489.749120,4+) rtinseconds(1415) index(15311)

Title: Locus:1.1.1.3058.16 File:"2013-07-02 CLN FXIII 180 min 3rd F 2.wiff"

Data file C:\Program Files (x86)\Matrix Science\Mascot Daemon\mgf9 FXIII 180 min 3rd\mascot\_daemon\_merge.mgf

Click mouse within plot area to zoom in by factor of two about that point

Or, Plot from  to  Da

Label all possible matches  Label matches used for scoring

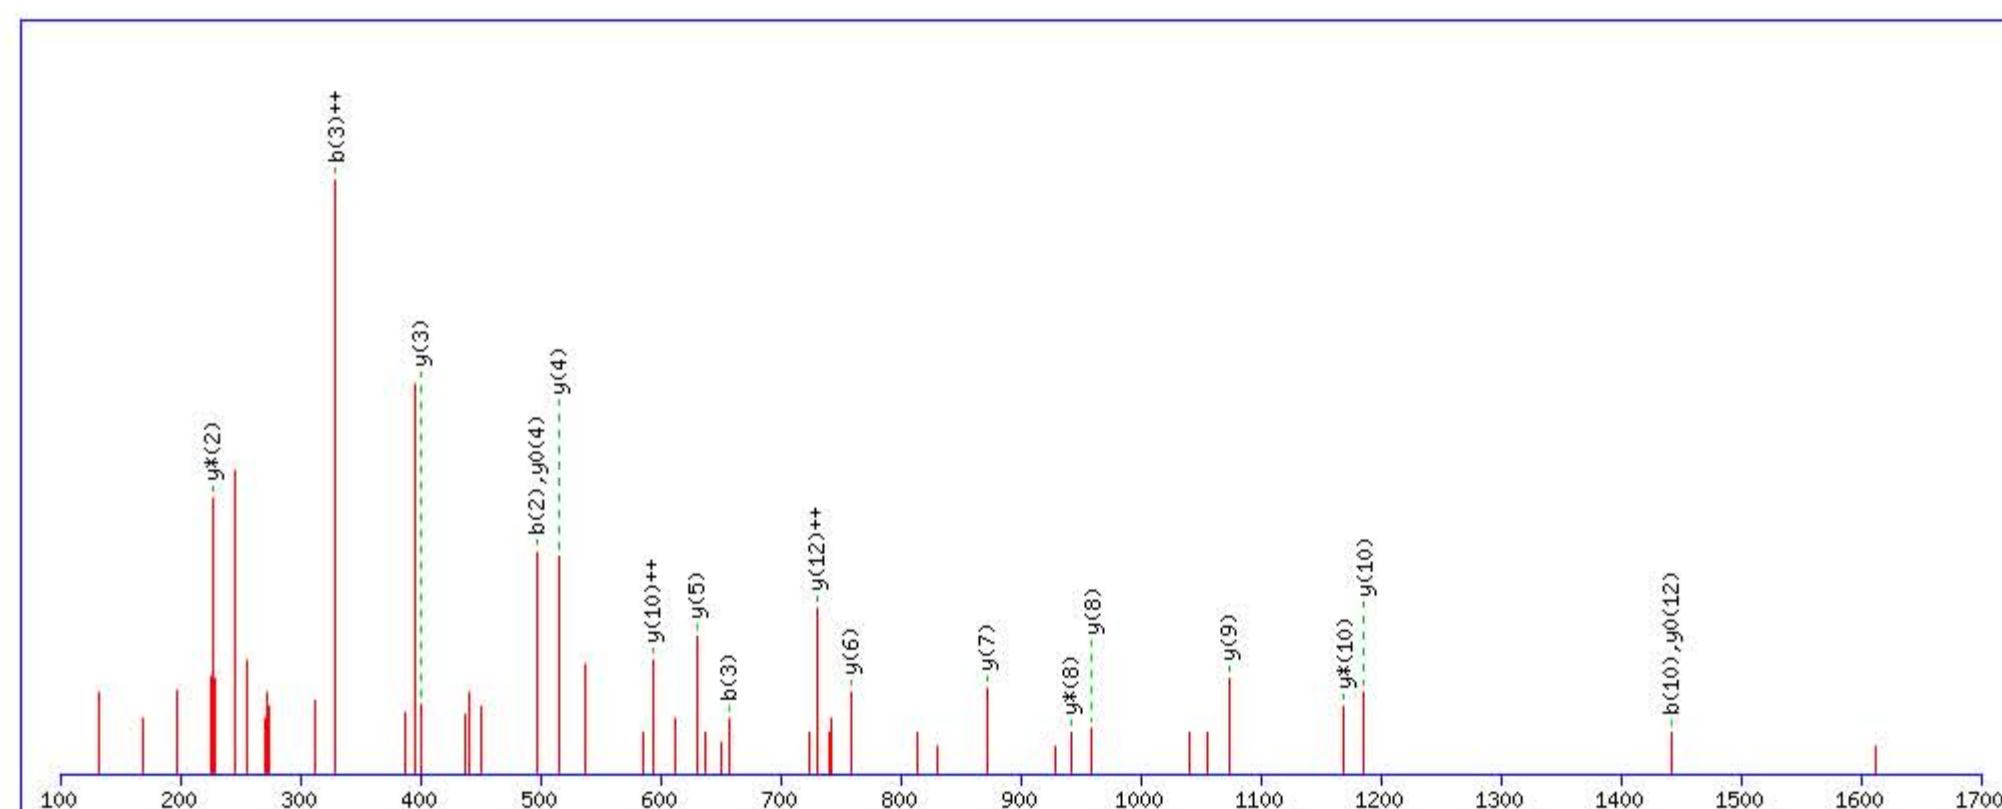

Monoisotopic mass of neutral peptide Mr(calc): 1954.971680

Fixed modifications: Carbamidomethyl (C) (apply to specified residues or termini only)

Variable modifications:

Q2 : Biotin:Thermo-21345 (Q)

Ions Score: 53 Expect: 0.00013

Matches : 19/136 fragment ions using 24 most intense peaks [\(help\)](#)

| #  | b                  | b <sup>++</sup>   | b <sup>*</sup> | b <sup>*++</sup> | b <sup>0</sup> | b <sup>0++</sup> | Seq. | y                  | y <sup>++</sup>   | y <sup>*</sup>     | y <sup>*++</sup> | y <sup>0</sup>     | y <sup>0++</sup> | #  |
|----|--------------------|-------------------|----------------|------------------|----------------|------------------|------|--------------------|-------------------|--------------------|------------------|--------------------|------------------|----|
| 1  | 58.028740          | 29.518008         |                |                  |                |                  | G    |                    |                   |                    |                  |                    |                  | 14 |
| 2  | <b>497.254066</b>  | 249.130671        | 480.227517     | 240.617397       |                |                  | Q    | 1898.957513        | 949.982395        | 1881.930964        | 941.469120       | 1880.946948        | 940.977112       | 13 |
| 3  | <b>657.284715</b>  | <b>329.145996</b> | 640.258166     | 320.632721       |                |                  | C    | 1459.732187        | <b>730.369732</b> | 1442.705638        | 721.856457       | <b>1441.721622</b> | 721.364449       | 12 |
| 4  | 770.368779         | 385.688028        | 753.342230     | 377.174753       |                |                  | I    | 1299.701538        | 650.354407        | 1282.674989        | 641.841133       | 1281.690973        | 641.349125       | 11 |
| 5  | 883.452843         | 442.230060        | 866.426294     | 433.716785       |                |                  | I    | <b>1186.617474</b> | <b>593.812375</b> | <b>1169.590925</b> | 585.299101       | 1168.606909        | 584.807093       | 10 |
| 6  | 997.495770         | 499.251523        | 980.469221     | 490.738249       |                |                  | N    | <b>1073.533410</b> | 537.270343        | 1056.506861        | 528.757069       | 1055.522845        | 528.265061       | 9  |
| 7  | 1084.527798        | 542.767537        | 1067.501249    | 534.254263       | 1066.517233    | 533.762255       | S    | <b>959.490483</b>  | 480.248880        | <b>942.463934</b>  | 471.735605       | 941.479918         | 471.243597       | 8  |
| 8  | 1198.570725        | 599.789001        | 1181.544176    | 591.275726       | 1180.560160    | 590.783718       | N    | <b>872.458455</b>  | 436.732866        | 855.431906         | 428.219591       | 854.447890         | 427.727583       | 7  |
| 9  | 1326.665688        | 663.836482        | 1309.639139    | 655.323208       | 1308.655123    | 654.831200       | K    | <b>758.415528</b>  | 379.711402        | 741.388979         | 371.198128       | 740.404963         | 370.706120       | 6  |
| 10 | <b>1441.692631</b> | 721.349954        | 1424.666082    | 712.836679       | 1423.682066    | 712.344671       | D    | <b>630.320565</b>  | 315.663921        | 613.294016         | 307.150646       | 612.310000         | 306.658638       | 5  |
| 11 | 1556.719574        | 778.863425        | 1539.693025    | 770.350151       | 1538.709009    | 769.858143       | D    | <b>515.293622</b>  | 258.150449        | 498.267073         | 249.637175       | <b>497.283057</b>  | 249.145167       | 4  |
| 12 | 1712.820685        | 856.913981        | 1695.794136    | 848.400706       | 1694.810120    | 847.908698       | R    | <b>400.266679</b>  | 200.636977        | 383.240130         | 192.123703       |                    |                  | 3  |
| 13 | 1809.873449        | 905.440363        | 1792.846900    | 896.927088       | 1791.862884    | 896.435080       | P    | 244.165568         | 122.586422        | <b>227.139019</b>  | 114.073148       |                    |                  | 2  |
| 14 |                    |                   |                |                  |                |                  | K    | 147.112804         | 74.060040         | 130.086255         | 65.546765        |                    |                  | 1  |

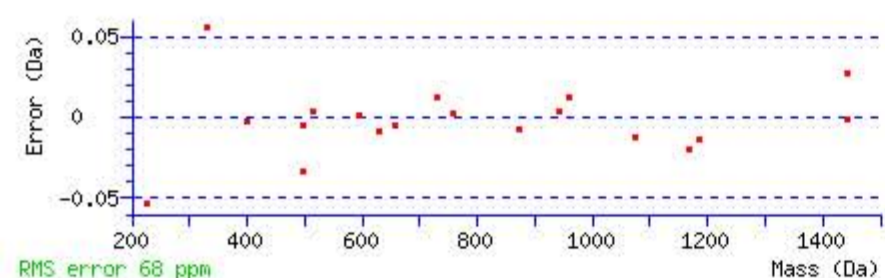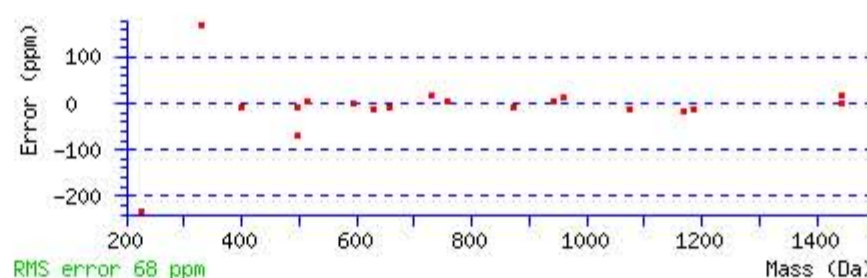

NCBI BLAST search of [GQCIINSNKDDRPK](#)

(Parameters: blastp, nr protein database, expect=20000, no filter, PAM30)

Other BLAST [web gateways](#)

All matches to this query

| Score | Mr(calc):   | Delta     | Sequence                       |
|-------|-------------|-----------|--------------------------------|
| 52.8  | 1954.971680 | -0.004304 | <a href="#">GQCIINSNKDDRPK</a> |

Mascot: <http://www.matrixscience.com/>

# MASCOT Search Results

## Peptide View

MS/MS Fragmentation of **SCCEEQNKVNCLQTR**

Found in **AFAM\_HUMAN**, Afamin OS=Homo sapiens GN=AFM PE=1 SV=1

Match to Query 43880: 2235.983562 from(746.335130,3+) rtinseconds(1514) index(2053)

Title: Locus:1.1.1.3046.20 File:"2013-07-02 CLN FXIII 180 min 3rd F 1.wiff"

Data file C:\Program Files (x86)\Matrix Science\Mascot Daemon\mgf\9 FXIII 180 min 3rd\mascot\_daemon\_merge.mgf

Click mouse within plot area to zoom in by factor of two about that point

Or, Plot from  to  Da

Label all possible matches  Label matches used for scoring

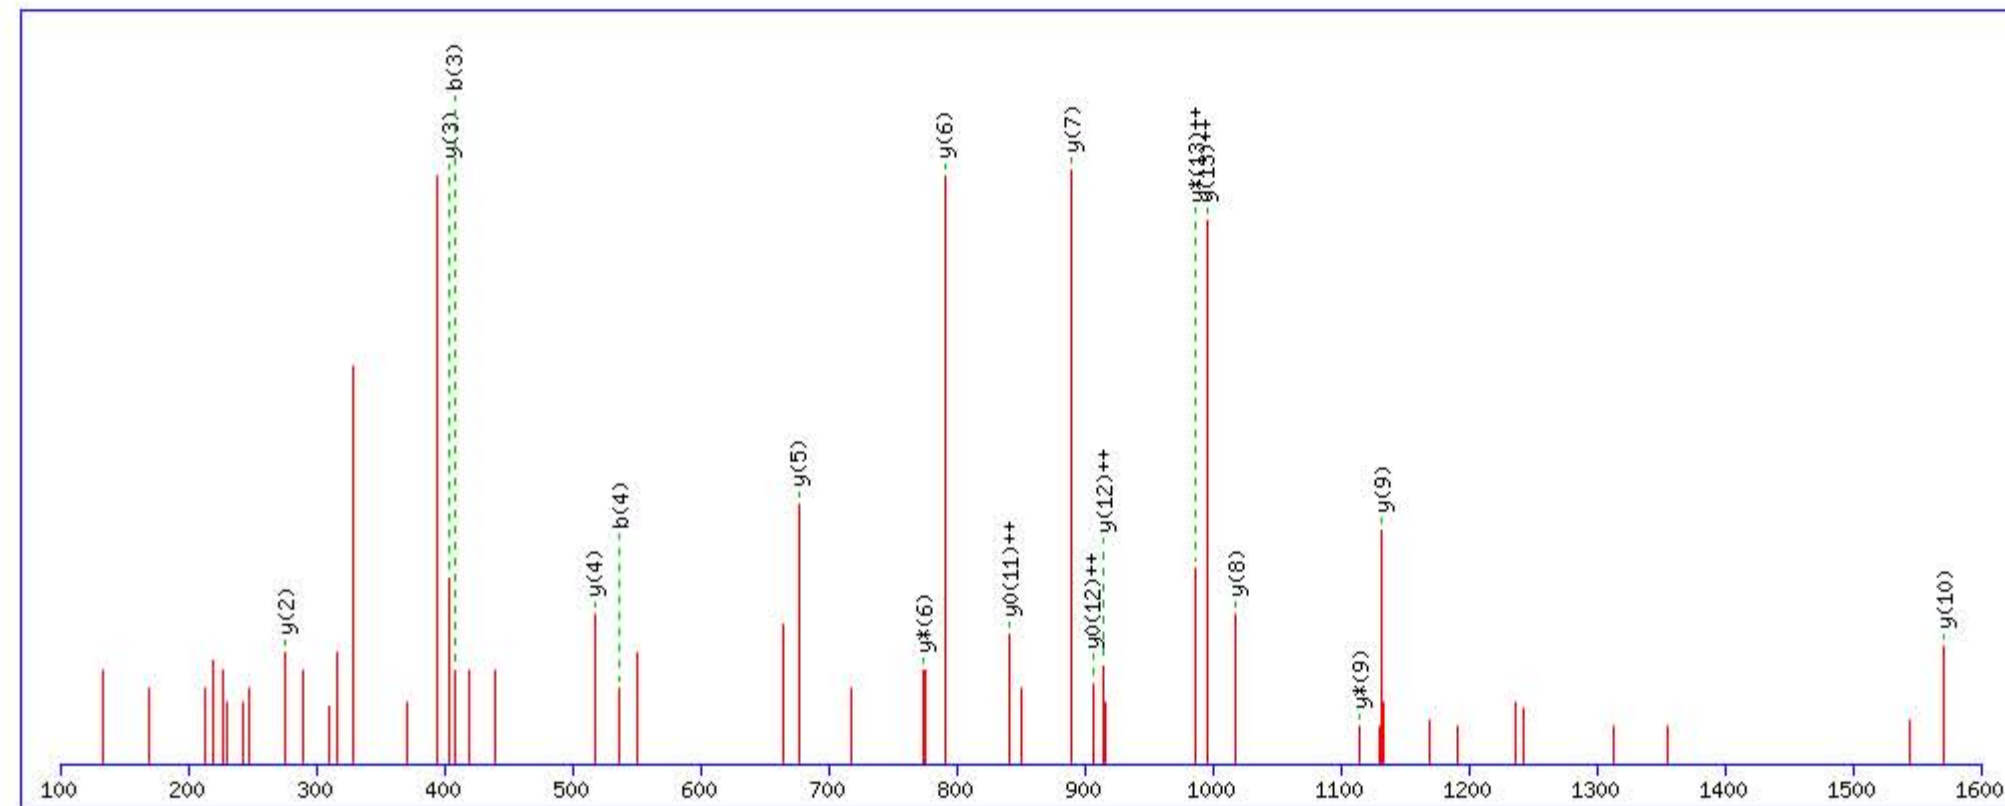

Monoisotopic mass of neutral peptide  $M_r(\text{calc})$ : 2235.985703

Fixed modifications: Carbamidomethyl (C) (apply to specified residues or termini only)

Variable modifications:

Q6 : Biotin:Thermo-21345 (Q)

Ions Score: 37 Expect: 0.001

Matches : 18/156 fragment ions using 43 most intense peaks [\(help\)](#)

| #  | b                 | b <sup>++</sup> | b <sup>*</sup> | b <sup>+++</sup> | b <sup>0</sup> | b <sup>0++</sup> | Seq. | y                  | y <sup>++</sup>   | y <sup>*</sup>     | y <sup>+++</sup>  | y <sup>0</sup> | y <sup>0++</sup>  | #  |
|----|-------------------|-----------------|----------------|------------------|----------------|------------------|------|--------------------|-------------------|--------------------|-------------------|----------------|-------------------|----|
| 1  | 88.039304         | 44.523290       |                |                  | 70.028739      | 35.518008        | S    |                    |                   |                    |                   |                |                   | 15 |
| 2  | 248.069953        | 124.538614      |                |                  | 230.059388     | 115.533332       | C    | 2149.960963        | 1075.484119       | 2132.934414        | 1066.970845       | 2131.950398    | 1066.478837       | 14 |
| 3  | <b>408.100602</b> | 204.553939      |                |                  | 390.090037     | 195.548657       | C    | 1989.930314        | <b>995.468795</b> | 1972.903765        | <b>986.955521</b> | 1971.919749    | 986.463512        | 13 |
| 4  | <b>537.143195</b> | 269.075236      |                |                  | 519.132630     | 260.069953       | E    | 1829.899665        | <b>915.453470</b> | 1812.873116        | 906.940196        | 1811.889100    | <b>906.448188</b> | 12 |
| 5  | 666.185788        | 333.596532      |                |                  | 648.175223     | 324.591250       | E    | 1700.857072        | 850.932174        | 1683.830523        | 842.418899        | 1682.846507    | <b>841.926891</b> | 11 |
| 6  | 1105.411114       | 553.209195      | 1088.384565    | 544.695921       | 1087.400549    | 544.203913       | Q    | <b>1571.814479</b> | 786.410877        | 1554.787930        | 777.897603        | 1553.803914    | 777.405595        | 10 |
| 7  | 1219.454041       | 610.230659      | 1202.427492    | 601.717384       | 1201.443476    | 601.225376       | N    | <b>1132.589153</b> | 566.798214        | <b>1115.562604</b> | 558.284940        | 1114.578588    | 557.792932        | 9  |
| 8  | 1347.549004       | 674.278140      | 1330.522455    | 665.764866       | 1329.538439    | 665.272858       | K    | <b>1018.546226</b> | 509.776751        | 1001.519677        | 501.263476        | 1000.535661    | 500.771468        | 8  |
| 9  | 1446.617418       | 723.812347      | 1429.590869    | 715.299073       | 1428.606853    | 714.807065       | V    | <b>890.451263</b>  | 445.729269        | 873.424714         | 437.215995        | 872.440698     | 436.723987        | 7  |
| 10 | 1560.660345       | 780.833811      | 1543.633796    | 772.320536       | 1542.649780    | 771.828528       | N    | <b>791.382849</b>  | 396.195062        | <b>774.356300</b>  | 387.681788        | 773.372284     | 387.189780        | 6  |
| 11 | 1720.690994       | 860.849135      | 1703.664445    | 852.335861       | 1702.680429    | 851.843853       | C    | <b>677.339922</b>  | 339.173599        | 660.313373         | 330.660324        | 659.329357     | 330.168316        | 5  |
| 12 | 1833.775058       | 917.391167      | 1816.748509    | 908.877893       | 1815.764493    | 908.385885       | L    | <b>517.309273</b>  | 259.158274        | 500.282724         | 250.645000        | 499.298708     | 250.152992        | 4  |
| 13 | 1961.833636       | 981.420456      | 1944.807087    | 972.907182       | 1943.823071    | 972.415174       | Q    | <b>404.225209</b>  | 202.616242        | 387.198660         | 194.102968        | 386.214644     | 193.610960        | 3  |
| 14 | 2062.881315       | 1031.944295     | 2045.854766    | 1023.431021      | 2044.870750    | 1022.939013      | T    | <b>276.166631</b>  | 138.586953        | 259.140082         | 130.073679        | 258.156066     | 129.581671        | 2  |
| 15 |                   |                 |                |                  |                |                  | R    | 175.118952         | 88.063114         | 158.092403         | 79.549839         |                |                   | 1  |

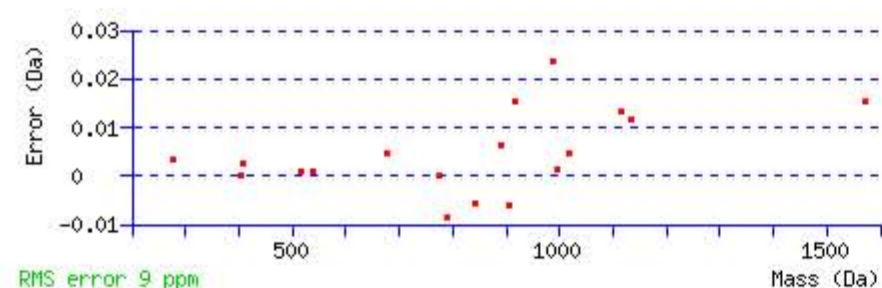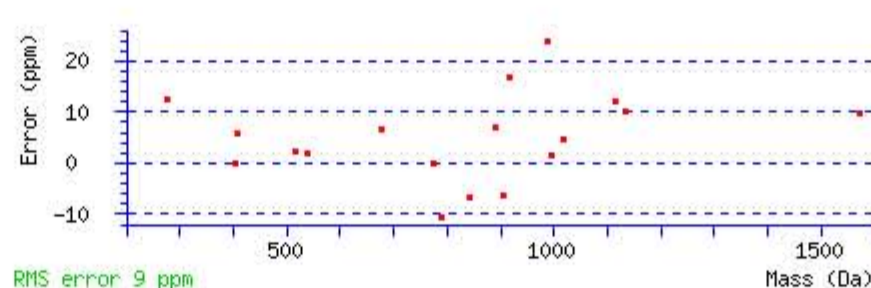

NCBI BLAST search of **SCCEEQNKVNCLQTR**

(Parameters: blastp, nr protein database, expect=20000, no filter, PAM30)

Other BLAST [web gateways](#)

All matches to this query

| Score | $M_r(\text{calc})$ | Delta     | Sequence                        |
|-------|--------------------|-----------|---------------------------------|
| 37.2  | 2235.985703        | -0.002141 | <a href="#">SCCEEQNKVNCLQTR</a> |
| 0.4   | 2235.985703        | -0.002141 | <a href="#">SCCEEQNKVNCLQTR</a> |

# MASCOT SCIENCE Mascot Search Results

## Peptide View

MS/MS Fragmentation of **HQFLLTGDTQGR**

Found in **A1BG\_HUMAN**, Alpha-1B-glycoprotein OS=Homo sapiens GN=A1BG PE=1 SV=4

Match to Query 33363: 1682.851032 from(561.957620,3+) rtinseconds(1959) index(18828)

Title: Locus:1.1.1.3248.5 File:"2013-07-02 CLN FXIII 180 min 3rd F 2.wiff"

Data file C:\Program Files (x86)\Matrix Science\Mascot Daemon\mgf9 FXIII 180 min 3rd\mascot\_daemon\_merge.mgf

Click mouse within plot area to zoom in by factor of two about that point

Or, Plot from  to  Da

Label all possible matches  Label matches used for scoring

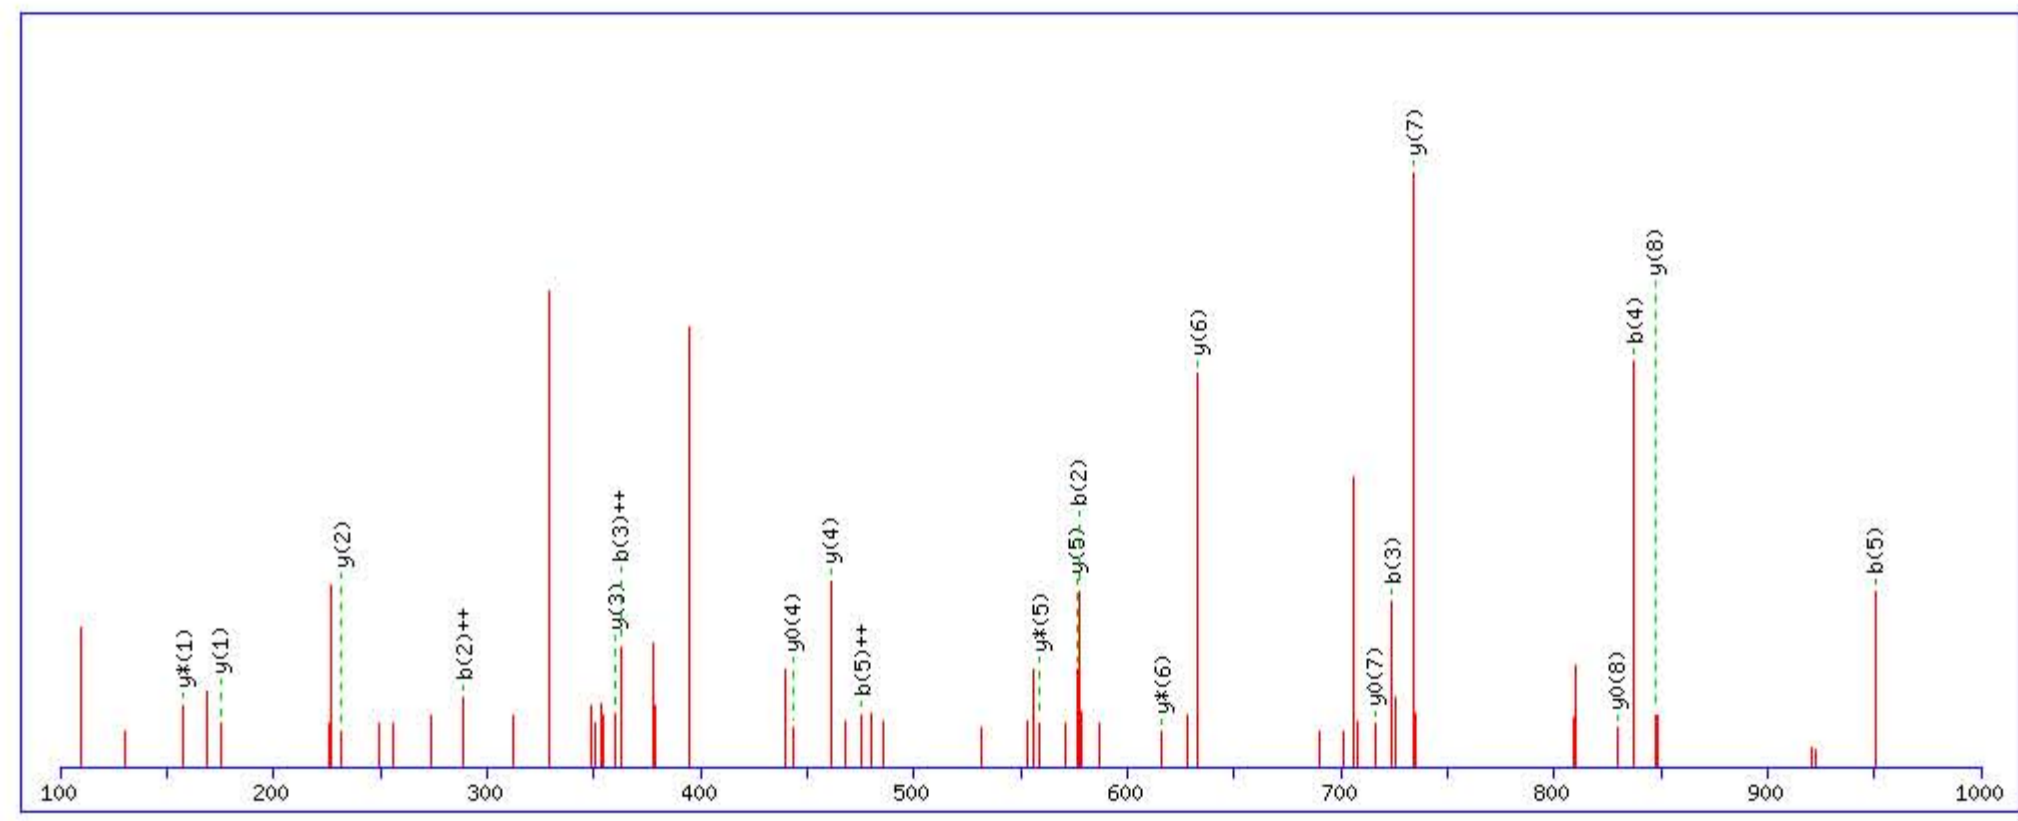

Monoisotopic mass of neutral peptide Mr(calc): 1682.856277

Fixed modifications: Carbamidomethyl (C) (apply to specified residues or termini only)

Variable modifications:

Q2 : Biotin:Thermo-21345 (Q)

Ions Score: 29 Expect: 0.0047

Matches : 21/114 fragment ions using 56 most intense peaks [\(help\)](#)

| #  | b           | b <sup>++</sup> | b <sup>*</sup> | b <sup>*++</sup> | b <sup>0</sup> | b <sup>0++</sup> | Seq. | y           | y <sup>++</sup> | y <sup>*</sup> | y <sup>*++</sup> | y <sup>0</sup> | y <sup>0++</sup> | #  |
|----|-------------|-----------------|----------------|------------------|----------------|------------------|------|-------------|-----------------|----------------|------------------|----------------|------------------|----|
| 1  | 138.066188  | 69.536732       |                |                  |                |                  | H    |             |                 |                |                  |                |                  | 12 |
| 2  | 577.291514  | 289.149395      | 560.264965     | 280.636121       |                |                  | Q    | 1546.804627 | 773.905951      | 1529.778078    | 765.392677       | 1528.794062    | 764.900669       | 11 |
| 3  | 724.359928  | 362.683602      | 707.333379     | 354.170327       |                |                  | F    | 1107.579301 | 554.293288      | 1090.552752    | 545.780014       | 1089.568736    | 545.288006       | 10 |
| 4  | 837.443992  | 419.225634      | 820.417443     | 410.712359       |                |                  | L    | 960.510887  | 480.759081      | 943.484338     | 472.245807       | 942.500322     | 471.753799       | 9  |
| 5  | 950.528056  | 475.767666      | 933.501507     | 467.254392       |                |                  | L    | 847.426823  | 424.217049      | 830.400274     | 415.703775       | 829.416258     | 415.211767       | 8  |
| 6  | 1051.575735 | 526.291505      | 1034.549186    | 517.778231       | 1033.565170    | 517.286223       | T    | 734.342759  | 367.675017      | 717.316210     | 359.161743       | 716.332194     | 358.669735       | 7  |
| 7  | 1108.597199 | 554.802237      | 1091.570650    | 546.288963       | 1090.586634    | 545.796955       | G    | 633.295080  | 317.151178      | 616.268531     | 308.637903       | 615.284515     | 308.145895       | 6  |
| 8  | 1223.624142 | 612.315709      | 1206.597593    | 603.802435       | 1205.613577    | 603.310426       | D    | 576.273616  | 288.640446      | 559.247067     | 280.127171       | 558.263051     | 279.635163       | 5  |
| 9  | 1324.671821 | 662.839548      | 1307.645272    | 654.326274       | 1306.661256    | 653.834266       | T    | 461.246673  | 231.126974      | 444.220124     | 222.613700       | 443.236108     | 222.121692       | 4  |
| 10 | 1452.730399 | 726.868837      | 1435.703850    | 718.355563       | 1434.719834    | 717.863555       | Q    | 360.198994  | 180.603135      | 343.172445     | 172.089860       |                |                  | 3  |
| 11 | 1509.751863 | 755.379569      | 1492.725314    | 746.866295       | 1491.741298    | 746.374287       | G    | 232.140416  | 116.573846      | 215.113867     | 108.060571       |                |                  | 2  |
| 12 |             |                 |                |                  |                |                  | R    | 175.118952  | 88.063114       | 158.092403     | 79.549839        |                |                  | 1  |

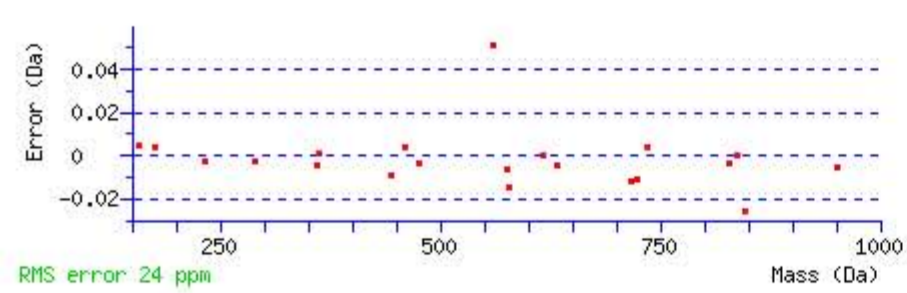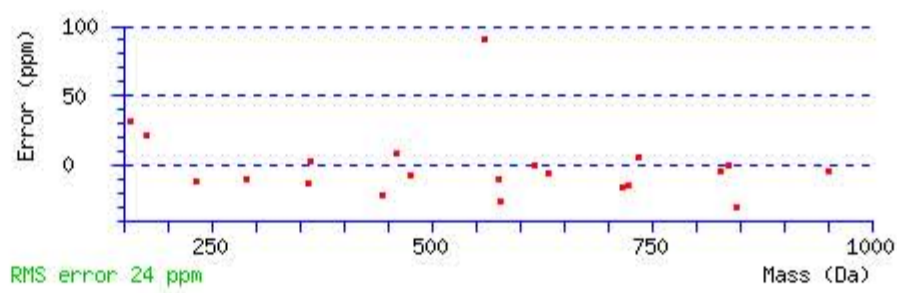

NCBI BLAST search of [HQFLLTGDTQGR](#)

(Parameters: blastp, nr protein database, expect=20000, no filter, PAM30)

Other BLAST [web gateways](#)

### All matches to this query

| Score | Mr(calc):   | Delta     | Sequence                       |
|-------|-------------|-----------|--------------------------------|
| 28.7  | 1682.856277 | -0.005245 | <a href="#">HQFLLTGDTQGR</a>   |
| 3.7   | 1682.845032 | 0.006000  | <a href="#">APEHCELVVDLFVR</a> |
| 0.7   | 1682.845032 | 0.006000  | <a href="#">QFHLTDDLLR</a>     |



# MASCOT SCIENCE Mascot Search Results

## Peptide View

MS/MS Fragmentation of **HQFLLTGDTQGR**

Found in **A1BG\_HUMAN**, Alpha-1B-glycoprotein OS=Homo sapiens GN=A1BG PE=1 SV=4

Match to Query 33366: 1682.861202 from(561.961010,3+) rtinseconds(1954) index(4497)

Title: Locus:1.1.1.3200.16 File:"2013-07-02 CLN FXIII 180 min 3rd F 1.wiff"

Data file C:\Program Files (x86)\Matrix Science\Mascot Daemon\mgf9 FXIII 180 min 3rd\mascot\_daemon\_merge.mgf

Click mouse within plot area to zoom in by factor of two about that point

Or, Plot from  to  Da

Label all possible matches  Label matches used for scoring

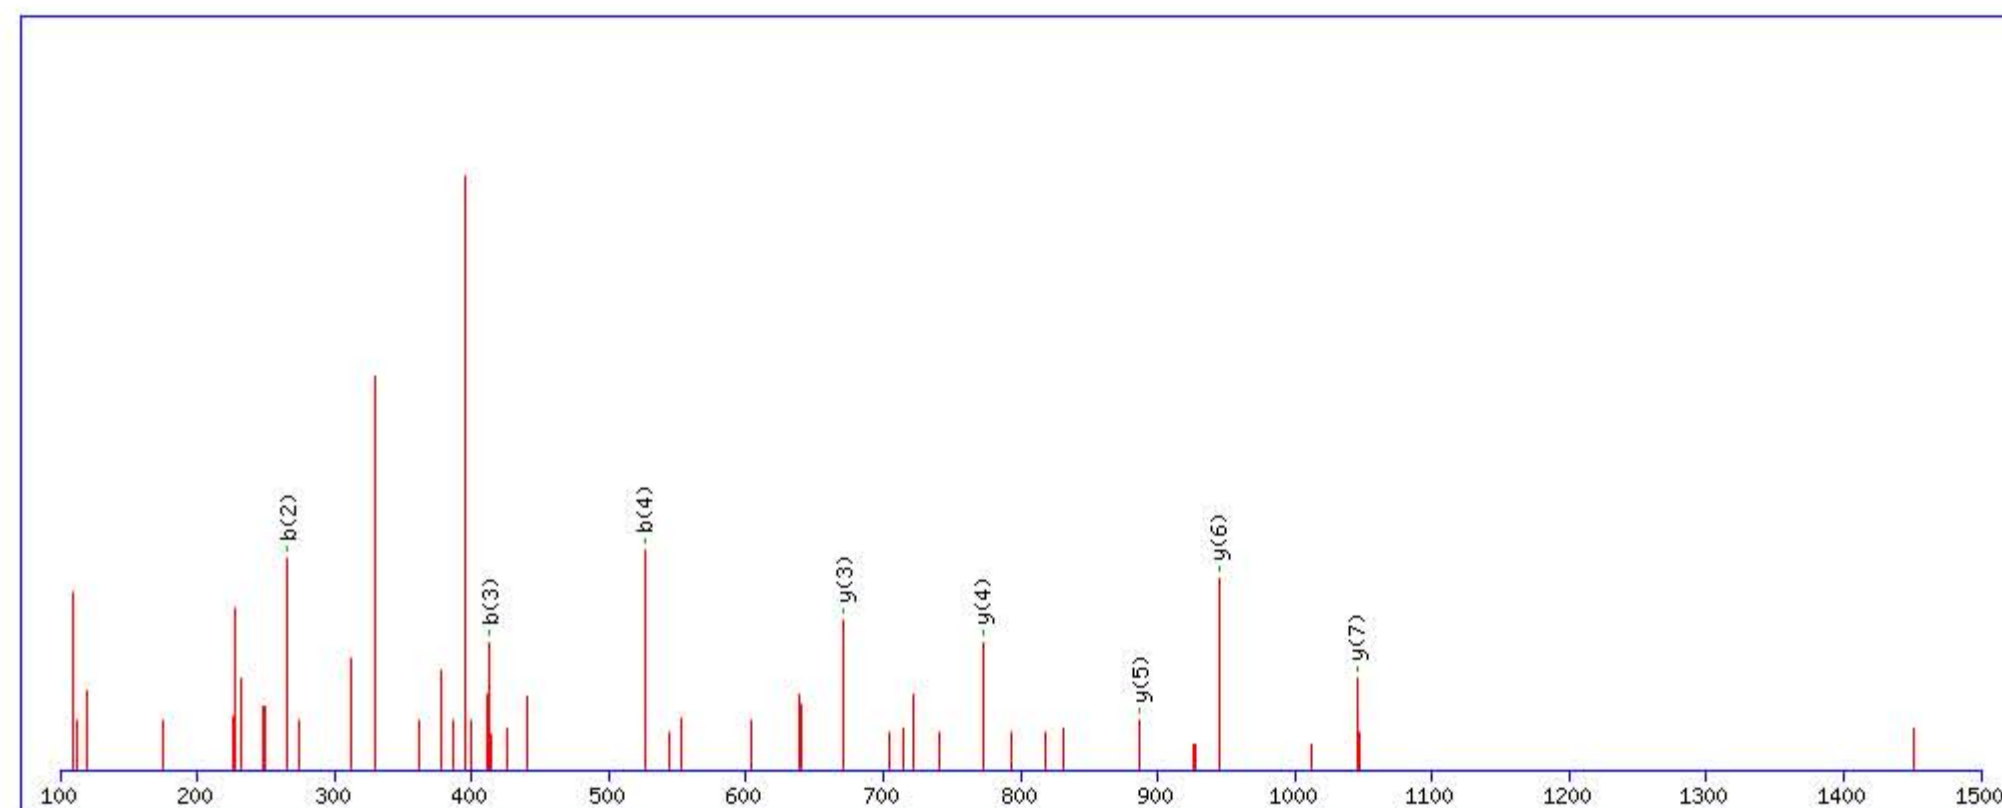

Monoisotopic mass of neutral peptide  $M_r(\text{calc})$ : 1682.856277

Fixed modifications: Carbamidomethyl (C) (apply to specified residues or termini only)

Variable modifications:

Q10 : Biotin:Thermo-21345 (Q)

Ions Score: 37 Expect: 0.0047

Matches : 8/114 fragment ions using 11 most intense peaks [\(help\)](#)

| #  | b                 | b <sup>++</sup> | b <sup>+</sup> | b <sup>*++</sup> | b <sup>0</sup> | b <sup>0++</sup> | Seq. | y                  | y <sup>++</sup> | y <sup>+</sup> | y <sup>*++</sup> | y <sup>0</sup> | y <sup>0++</sup> | #  |
|----|-------------------|-----------------|----------------|------------------|----------------|------------------|------|--------------------|-----------------|----------------|------------------|----------------|------------------|----|
| 1  | 138.066188        | 69.536732       |                |                  |                |                  | H    |                    |                 |                |                  |                |                  | 12 |
| 2  | <b>266.124766</b> | 133.566021      | 249.098217     | 125.052746       |                |                  | Q    | 1546.804627        | 773.905952      | 1529.778078    | 765.392677       | 1528.794062    | 764.900669       | 11 |
| 3  | <b>413.193180</b> | 207.100228      | 396.166631     | 198.586953       |                |                  | F    | 1418.746049        | 709.876663      | 1401.719500    | 701.363388       | 1400.735484    | 700.871380       | 10 |
| 4  | <b>526.277244</b> | 263.642260      | 509.250695     | 255.128986       |                |                  | L    | 1271.677635        | 636.342456      | 1254.651086    | 627.829181       | 1253.667070    | 627.337173       | 9  |
| 5  | 639.361308        | 320.184292      | 622.334759     | 311.671018       |                |                  | L    | 1158.593571        | 579.800424      | 1141.567022    | 571.287149       | 1140.583006    | 570.795141       | 8  |
| 6  | 740.408987        | 370.708132      | 723.382438     | 362.194857       | 722.398422     | 361.702849       | T    | <b>1045.509507</b> | 523.258392      | 1028.482958    | 514.745117       | 1027.498942    | 514.253109       | 7  |
| 7  | 797.430451        | 399.218864      | 780.403902     | 390.705589       | 779.419886     | 390.213581       | G    | <b>944.461828</b>  | 472.734552      | 927.435279     | 464.221278       | 926.451263     | 463.729270       | 6  |
| 8  | 912.457394        | 456.732335      | 895.430845     | 448.219061       | 894.446829     | 447.727053       | D    | <b>887.440364</b>  | 444.223820      | 870.413815     | 435.710546       | 869.429799     | 435.218538       | 5  |
| 9  | 1013.505073       | 507.256175      | 996.478524     | 498.742900       | 995.494508     | 498.250892       | T    | <b>772.413421</b>  | 386.710349      | 755.386872     | 378.197074       | 754.402856     | 377.705066       | 4  |
| 10 | 1452.730399       | 726.868838      | 1435.703850    | 718.355563       | 1434.719834    | 717.863555       | Q    | <b>671.365742</b>  | 336.186509      | 654.339193     | 327.673235       |                |                  | 3  |
| 11 | 1509.751863       | 755.379570      | 1492.725314    | 746.866295       | 1491.741298    | 746.374287       | G    | 232.140416         | 116.573846      | 215.113867     | 108.060571       |                |                  | 2  |
| 12 |                   |                 |                |                  |                |                  | R    | 175.118952         | 88.063114       | 158.092403     | 79.549839        |                |                  | 1  |

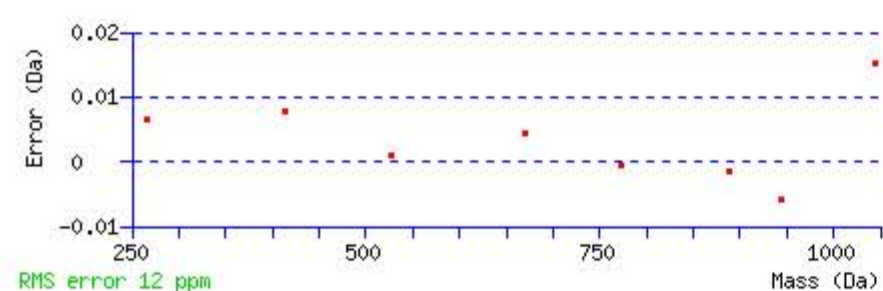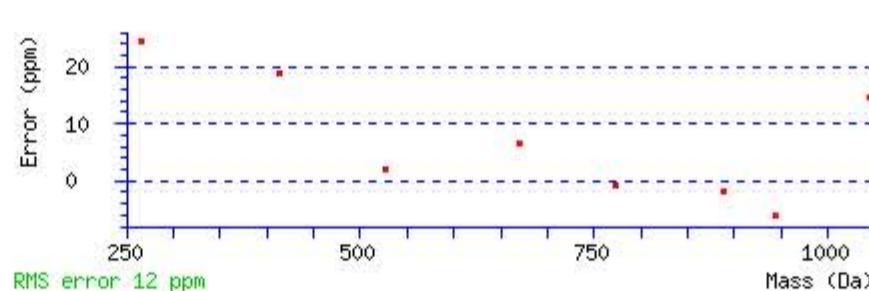

NCBI BLAST search of **HQFLLTGDTQGR**

(Parameters: blastp, nr protein database, expect=20000, no filter, PAM30)

Other BLAST [web gateways](#)

All matches to this query

| Score | $M_r(\text{calc})$ : | Delta    | Sequence                     |
|-------|----------------------|----------|------------------------------|
| 37.3  | 1682.856277          | 0.004925 | <a href="#">HQFLLTGDTQGR</a> |

Mascot: <http://www.matrixscience.com/>

# MASCOT Search Results

## Peptide View

MS/MS Fragmentation of **VTLTCVAPLSGVDFQLR**

Found in **A1BG\_HUMAN**, Alpha-1B-glycoprotein OS=Homo sapiens GN=A1BG PE=1 SV=4

Match to Query 43049: 2186.176572 from(729.732800,3+) rtinseconds(2759) index(9051)

Title: Locus:1.1.1.3480.10 File:"2013-07-02 CLN FXIII 180 min 3rd F 1.wiff"

Data file C:\Program Files (x86)\Matrix Science\Mascot Daemon\mgf9 FXIII 180 min 3rd\mascot\_daemon\_merge.mgf

Click mouse within plot area to zoom in by factor of two about that point

Or, Plot from  to  Da

Label all possible matches  Label matches used for scoring

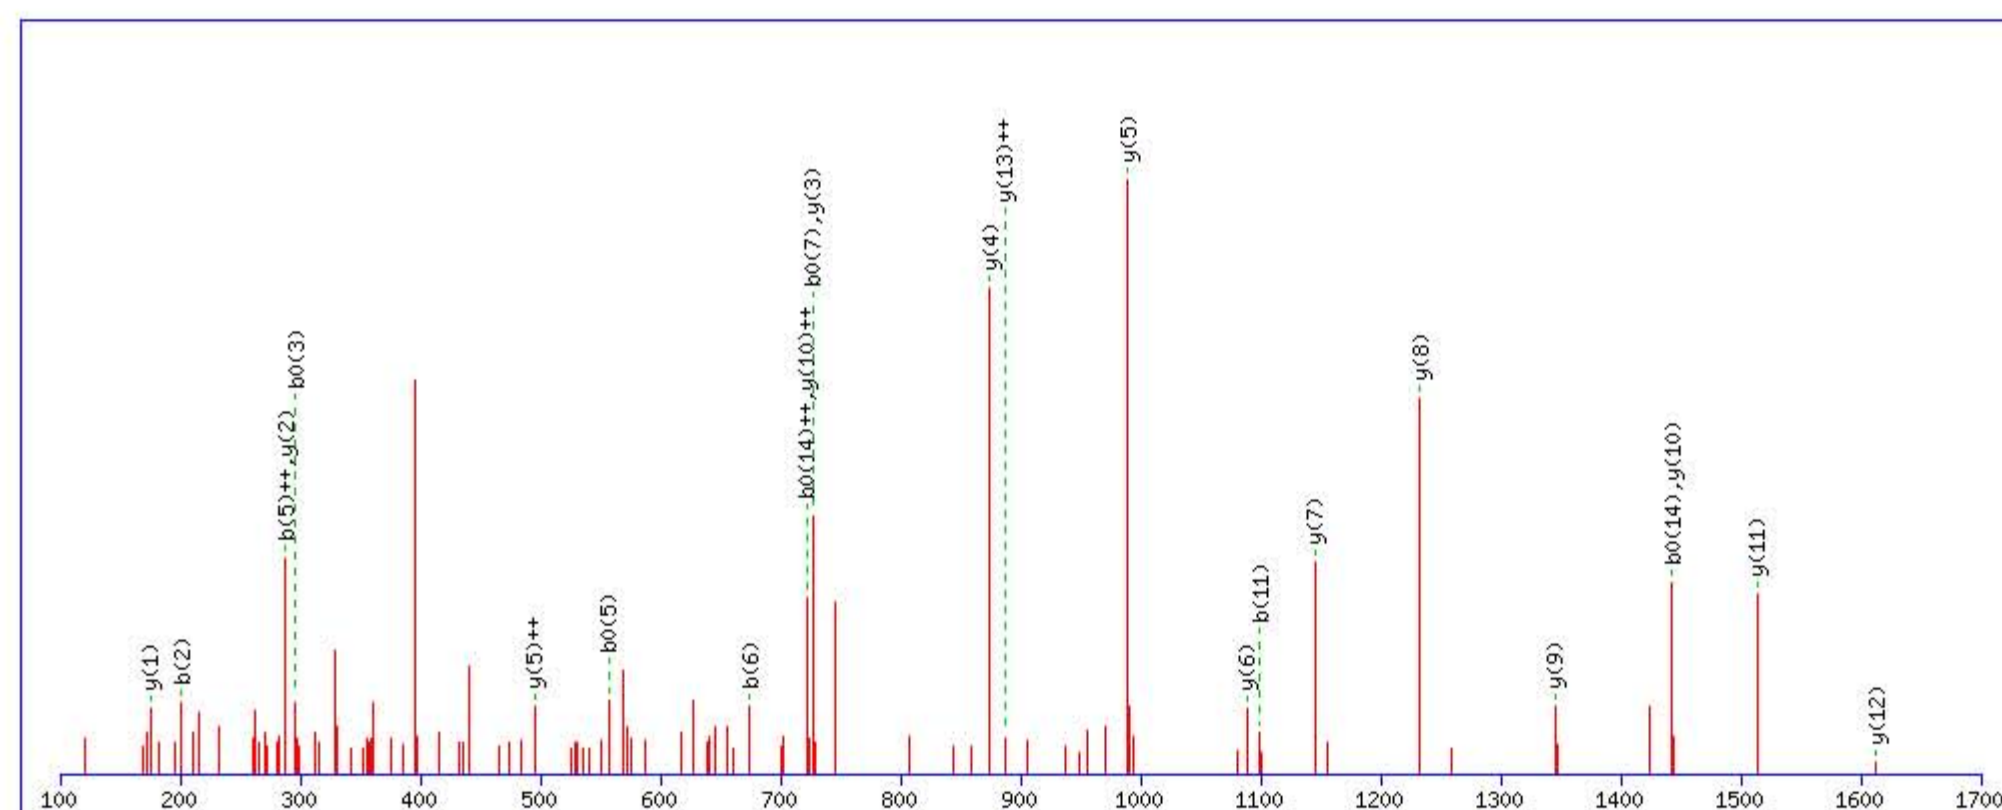

Monoisotopic mass of neutral peptide Mr(calc): 2186.159195

Fixed modifications: Carbamidomethyl (C) (apply to specified residues or termini only)

Variable modifications:

Q15 : Biotin:Thermo-21345 (Q)

Ions Score: 93 Expect: 7.1e-009

Matches : 24/154 fragment ions using 29 most intense peaks [\(help\)](#)

| #  | b                  | b <sup>++</sup>   | b <sup>+</sup> | b <sup>+++</sup> | b <sup>0</sup>     | b <sup>0++</sup>  | Seq. | y                  | y <sup>++</sup>   | y <sup>+</sup> | y <sup>+++</sup> | y <sup>0</sup> | y <sup>0++</sup> | #  |
|----|--------------------|-------------------|----------------|------------------|--------------------|-------------------|------|--------------------|-------------------|----------------|------------------|----------------|------------------|----|
| 1  | 100.075690         | 50.541483         |                |                  |                    |                   | V    |                    |                   |                |                  |                |                  | 17 |
| 2  | <b>201.123369</b>  | 101.065322        |                |                  | 183.112804         | 92.060040         | T    | 2088.098032        | 1044.552654       | 2071.071483    | 1036.039379      | 2070.087467    | 1035.547371      | 16 |
| 3  | 314.207433         | 157.607354        |                |                  | <b>296.196868</b>  | 148.602072        | L    | 1987.050353        | 994.028815        | 1970.023804    | 985.515540       | 1969.039788    | 985.023532       | 15 |
| 4  | 415.255112         | 208.131194        |                |                  | 397.244547         | 199.125912        | T    | 1873.966289        | 937.486783        | 1856.939740    | 928.973508       | 1855.955724    | 928.481500       | 14 |
| 5  | 575.285761         | <b>288.146519</b> |                |                  | <b>557.275196</b>  | 279.141236        | C    | 1772.918610        | <b>886.962943</b> | 1755.892061    | 878.449669       | 1754.908045    | 877.957661       | 13 |
| 6  | <b>674.354175</b>  | 337.680726        |                |                  | 656.343610         | 328.675443        | V    | <b>1612.887961</b> | 806.947619        | 1595.861412    | 798.434344       | 1594.877396    | 797.942336       | 12 |
| 7  | 745.391289         | 373.199283        |                |                  | <b>727.380724</b>  | 364.194000        | A    | <b>1513.819547</b> | 757.413412        | 1496.792998    | 748.900137       | 1495.808982    | 748.408129       | 11 |
| 8  | 842.444053         | 421.725665        |                |                  | 824.433488         | 412.720382        | P    | <b>1442.782433</b> | <b>721.894855</b> | 1425.755884    | 713.381580       | 1424.771868    | 712.889572       | 10 |
| 9  | 955.528117         | 478.267697        |                |                  | 937.517552         | 469.262414        | L    | <b>1345.729669</b> | 673.368473        | 1328.703120    | 664.855198       | 1327.719104    | 664.363190       | 9  |
| 10 | 1042.560145        | 521.783711        |                |                  | 1024.549580        | 512.778428        | S    | <b>1232.645605</b> | 616.826441        | 1215.619056    | 608.313166       | 1214.635040    | 607.821158       | 8  |
| 11 | <b>1099.581609</b> | 550.294443        |                |                  | 1081.571044        | 541.289160        | G    | <b>1145.613577</b> | 573.310427        | 1128.587028    | 564.797152       | 1127.603012    | 564.305144       | 7  |
| 12 | 1198.650023        | 599.828650        |                |                  | 1180.639458        | 590.823367        | V    | <b>1088.592113</b> | 544.799695        | 1071.565564    | 536.286420       | 1070.581548    | 535.794412       | 6  |
| 13 | 1313.676966        | 657.342121        |                |                  | 1295.666401        | 648.336839        | D    | <b>989.523699</b>  | <b>495.265488</b> | 972.497150     | 486.752213       | 971.513134     | 486.260205       | 5  |
| 14 | 1460.745380        | 730.876328        |                |                  | <b>1442.734815</b> | <b>721.871046</b> | F    | <b>874.496756</b>  | 437.752016        | 857.470207     | 429.238742       |                |                  | 4  |
| 15 | 1899.970706        | 950.488991        | 1882.944157    | 941.975717       | 1881.960141        | 941.483709        | Q    | <b>727.428342</b>  | 364.217809        | 710.401793     | 355.704535       |                |                  | 3  |
| 16 | 2013.054770        | 1007.031023       | 1996.028221    | 998.517749       | 1995.044205        | 998.025741        | L    | <b>288.203016</b>  | 144.605146        | 271.176467     | 136.091872       |                |                  | 2  |
| 17 |                    |                   |                |                  |                    |                   | R    | <b>175.118952</b>  | 88.063114         | 158.092403     | 79.549840        |                |                  | 1  |

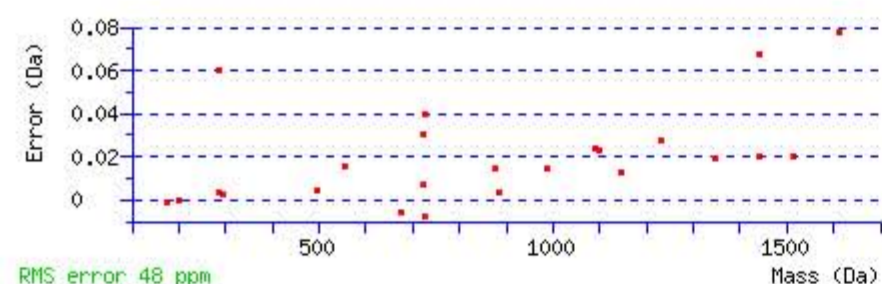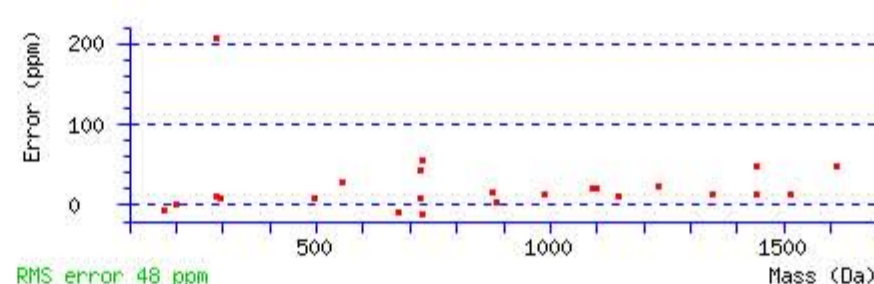

NCBI BLAST search of **VTLTCVAPLSGVDFQLR**

(Parameters: blastp, nr protein database, expect=20000, no filter, PAM30)

Other BLAST [web gateways](#)

## All matches to this query

| Score | Mr(calc):   | Delta     | Sequence                             |
|-------|-------------|-----------|--------------------------------------|
| 92.7  | 2186.159195 | 0.017377  | <a href="#">VTLTCVAPLSGVDFQLR</a>    |
| 5.5   | 2186.188126 | -0.011554 | <a href="#">KLTSHQMLSSTEILKWLK</a>   |
| 2.2   | 2186.188995 | -0.012423 | <a href="#">QAVAYRQMSLLLR</a>        |
| 0.7   | 2186.180267 | -0.003695 | <a href="#">RKGDLSPAELMMLTIGDVIK</a> |



# MASCOT Search Results

## Peptide View

MS/MS Fragmentation of **FDPSLTQR**

Found in **A2AP\_HUMAN**, Alpha-2-antiplasmin OS=Homo sapiens GN=SERPINF2 PE=1 SV=3

Match to Query 19637: 1273.651868 from(637.833210,2+) rtinseconds(1951) index(4478)

Title: Locus:1.1.1.3199.10 File:"2013-07-02 CLN FXIII 180 min 3rd F 1.wiff"

Data file C:\Program Files (x86)\Matrix Science\Mascot Daemon\mgf\9 FXIII 180 min 3rd\mascot\_daemon\_merge.mgf

Click mouse within plot area to zoom in by factor of two about that point

Or, Plot from  to  Da

Label all possible matches  Label matches used for scoring

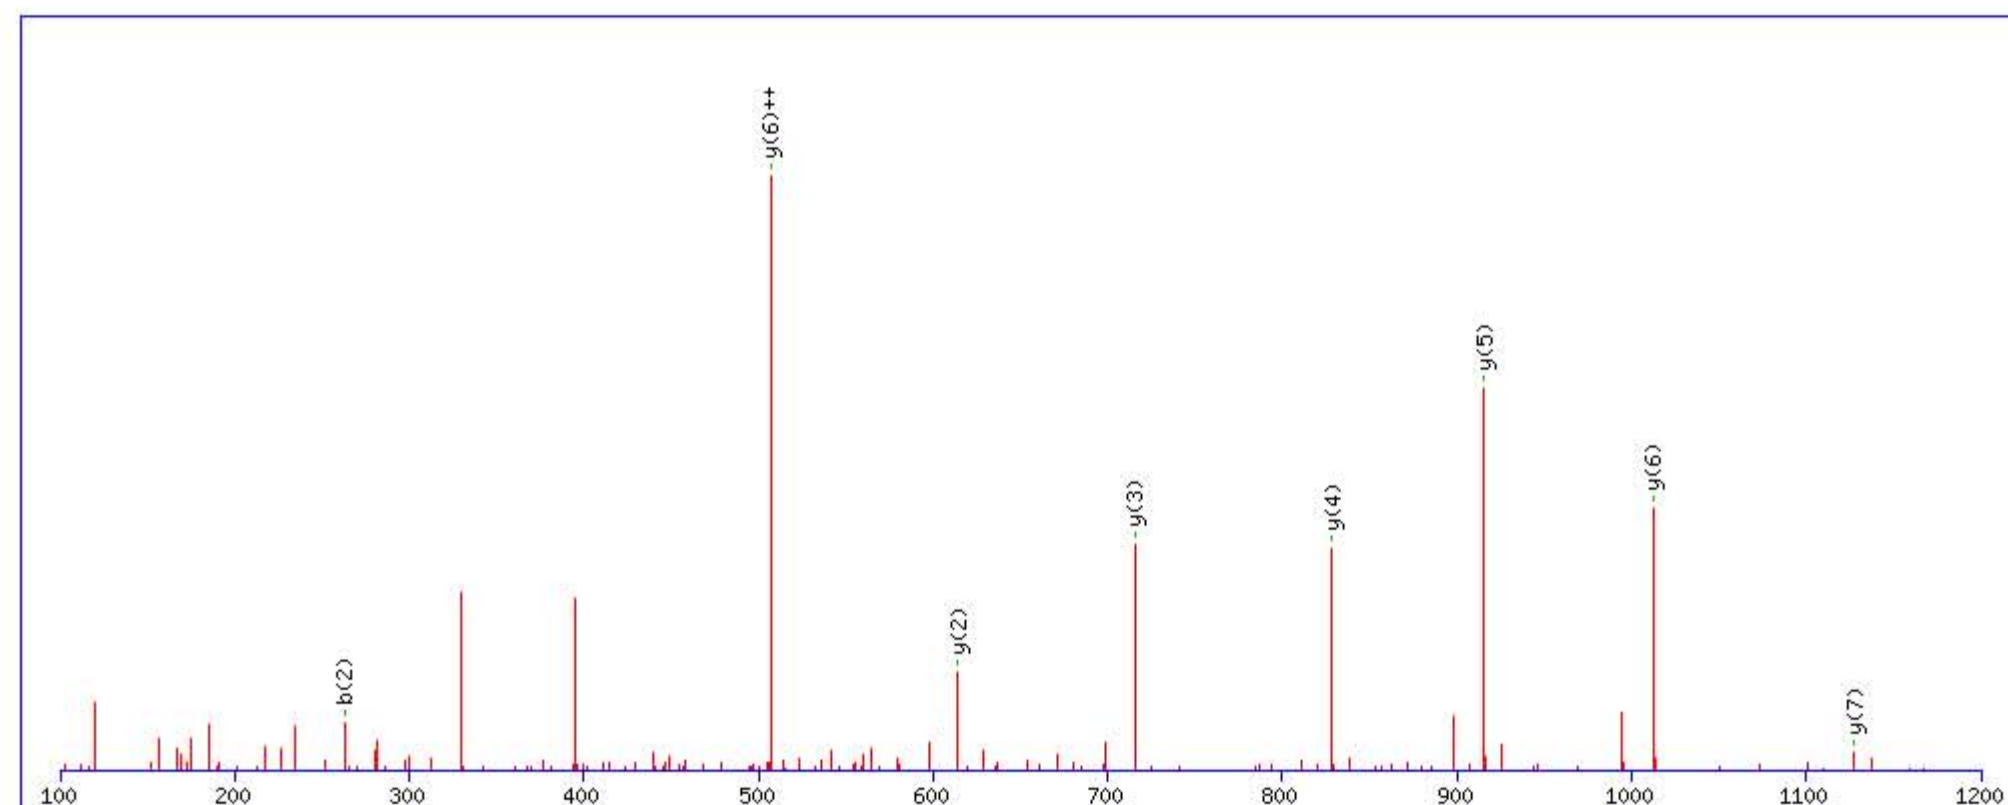

Monoisotopic mass of neutral peptide Mr(calc): 1273.648895

Fixed modifications: Carbamidomethyl (C) (apply to specified residues or termini only)

Variable modifications:

Q7 : Biotin:Thermo-21345 (Q)

Ions Score: 48 Expect: 0.00042

Matches : 8/66 fragment ions using 11 most intense peaks [\(help\)](#)

| # | b                 | b <sup>++</sup> | b <sup>*</sup> | b <sup>*++</sup> | b <sup>0</sup> | b <sup>0++</sup> | Seq. | y                  | y <sup>++</sup>   | y <sup>*</sup> | y <sup>*++</sup> | y <sup>0</sup> | y <sup>0++</sup> | # |
|---|-------------------|-----------------|----------------|------------------|----------------|------------------|------|--------------------|-------------------|----------------|------------------|----------------|------------------|---|
| 1 | 148.075690        | 74.541483       |                |                  |                |                  | F    |                    |                   |                |                  |                |                  | 8 |
| 2 | <b>263.102633</b> | 132.054954      |                |                  | 245.092068     | 123.049672       | D    | <b>1127.587756</b> | 564.297516        | 1110.561207    | 555.784242       | 1109.577191    | 555.292233       | 7 |
| 3 | 360.155397        | 180.581336      |                |                  | 342.144832     | 171.576054       | P    | <b>1012.560813</b> | <b>506.784045</b> | 995.534264     | 498.270770       | 994.550248     | 497.778762       | 6 |
| 4 | 447.187425        | 224.097350      |                |                  | 429.176860     | 215.092068       | S    | <b>915.508049</b>  | 458.257663        | 898.481500     | 449.744388       | 897.497484     | 449.252380       | 5 |
| 5 | 560.271489        | 280.639383      |                |                  | 542.260924     | 271.634100       | L    | <b>828.476021</b>  | 414.741649        | 811.449472     | 406.228374       | 810.465456     | 405.736366       | 4 |
| 6 | 661.319168        | 331.163222      |                |                  | 643.308603     | 322.157940       | T    | <b>715.391957</b>  | 358.199617        | 698.365408     | 349.686342       | 697.381392     | 349.194334       | 3 |
| 7 | 1100.544494       | 550.775885      | 1083.517945    | 542.262611       | 1082.533929    | 541.770603       | Q    | <b>614.344278</b>  | 307.675777        | 597.317729     | 299.162503       |                |                  | 2 |
| 8 |                   |                 |                |                  |                |                  | R    | 175.118952         | 88.063114         | 158.092403     | 79.549839        |                |                  | 1 |

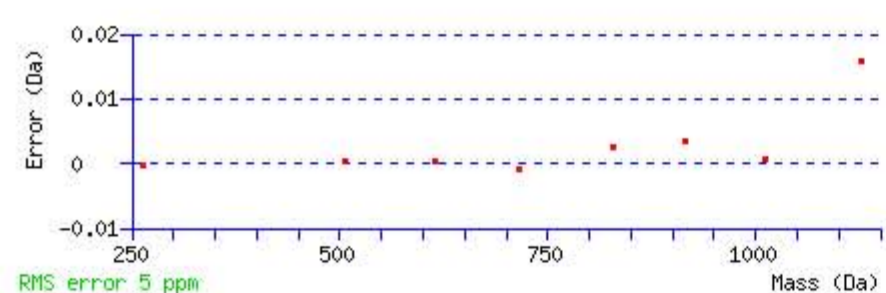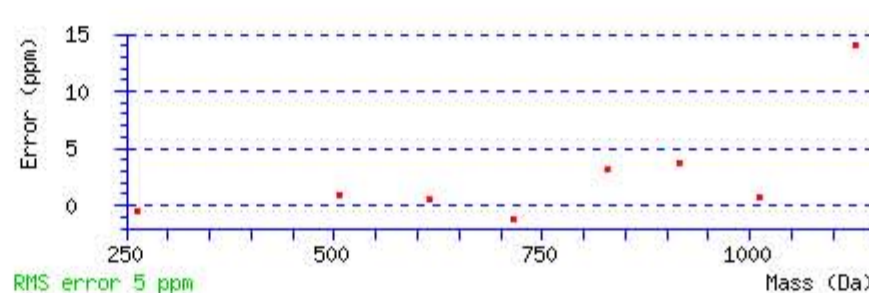

NCBI BLAST search of **FDPSLTQR**

(Parameters: blastp, nr protein database, expect=20000, no filter, PAM30)

Other BLAST [web gateways](#)

All matches to this query

| Score | Mr(calc):   | Delta     | Sequence                     |
|-------|-------------|-----------|------------------------------|
| 48.2  | 1273.648895 | 0.002973  | <a href="#">FDPSLTQR</a>     |
| 21.2  | 1273.670654 | -0.018786 | <a href="#">FDIAIYYTR</a>    |
| 17.4  | 1273.633621 | 0.018247  | <a href="#">ETESLTQR</a>     |
| 5.7   | 1273.652695 | -0.000827 | <a href="#">EHQAHLALAR</a>   |
| 4.0   | 1273.670013 | -0.018145 | <a href="#">DLVTMVEQLAR</a>  |
| 0.9   | 1273.670029 | -0.018161 | <a href="#">TDPSILGGMIVR</a> |
| 0.0   | 1273.648682 | 0.003186  | <a href="#">SASSPSPRRSSR</a> |

# MASCOT Search Results

## Peptide View

MS/MS Fragmentation of **EQQDSPGNK**

Found in **A2AP\_HUMAN**, Alpha-2-antiplasmin OS=Homo sapiens GN=SERPINF2 PE=1 SV=3

Match to Query 20555: 1312.592628 from(657.303590,2+) rtinseconds(1208) index(14391)

Title: Locus:1.1.1.2986.6 File:"2013-07-02 CLN FXIII 180 min 3rd F 2.wiff"

Data file C:\Program Files (x86)\Matrix Science\Mascot Daemon\mgf\9 FXIII 180 min 3rd\mascot\_daemon\_merge.mgf

Click mouse within plot area to zoom in by factor of two about that point

Or, Plot from  to  Da

Label all possible matches  Label matches used for scoring

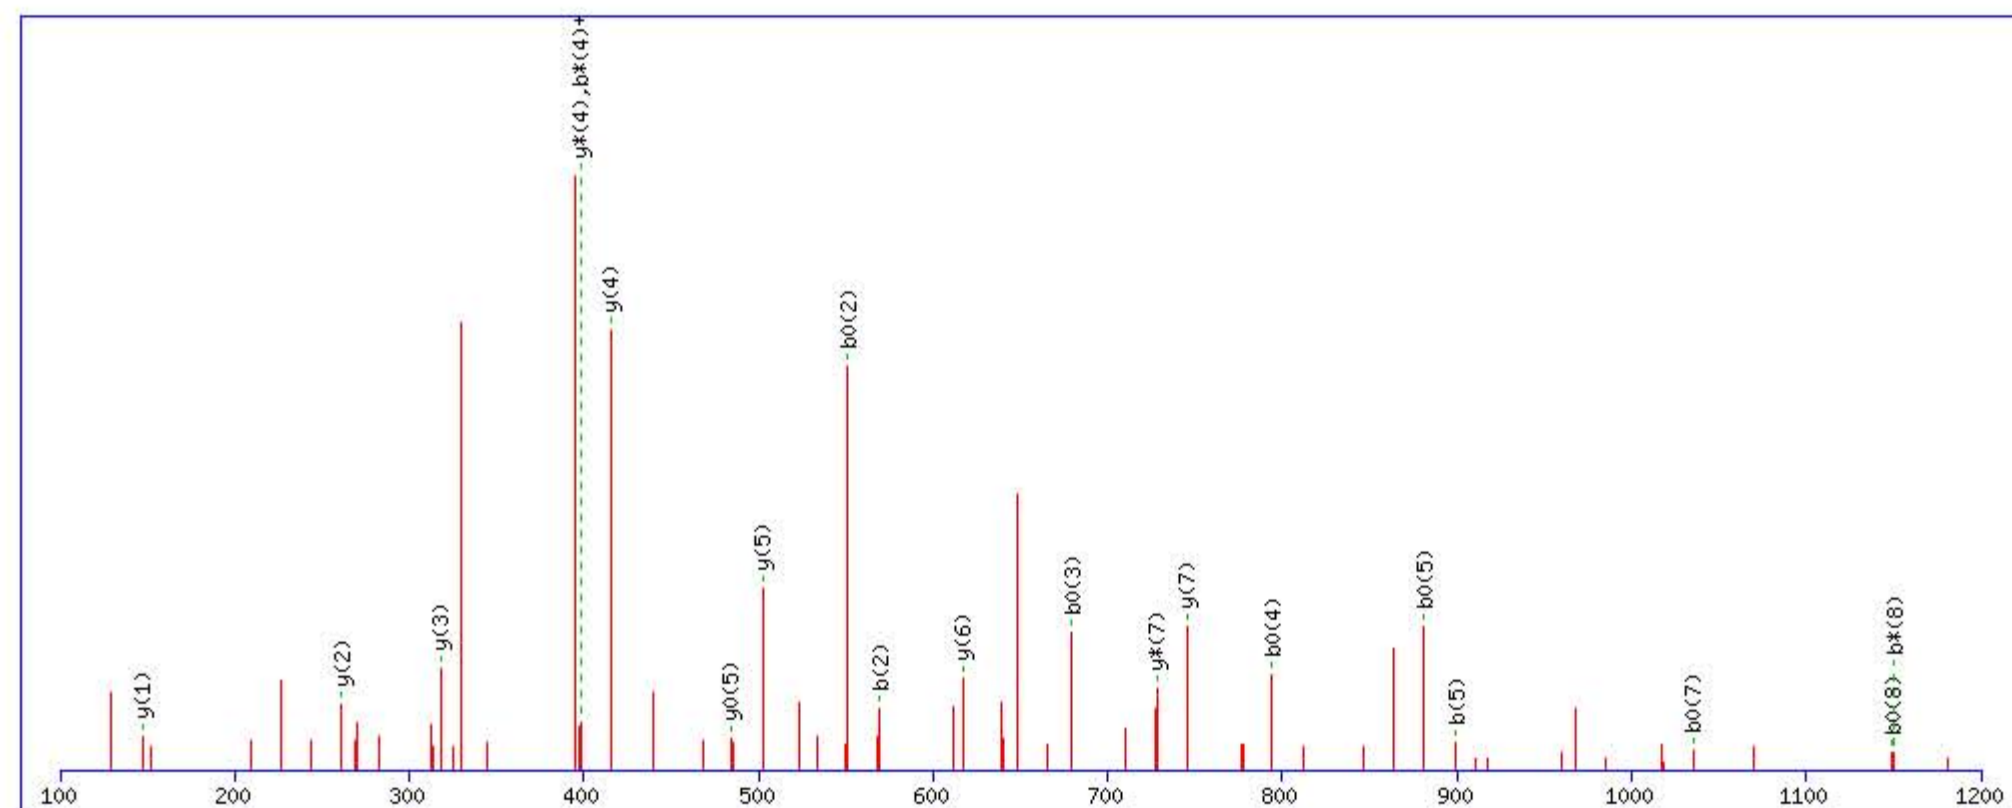

Monoisotopic mass of neutral peptide Mr(calc): 1312.608139

Fixed modifications: Carbamidomethyl (C) (apply to specified residues or termini only)

Variable modifications:

Q2 : Biotin:Thermo-21345 (Q)

Ions Score: 37 Expect: 0.00045

Matches : 20/86 fragment ions using 41 most intense peaks [\(help\)](#)

| # | b                 | b <sup>++</sup> | b <sup>+</sup>     | b <sup>+++</sup>  | b <sup>0</sup>     | b <sup>0++</sup> | Seq. | y                 | y <sup>++</sup> | y <sup>+</sup>    | y <sup>+++</sup> | y <sup>0</sup>    | y <sup>0++</sup> | # |
|---|-------------------|-----------------|--------------------|-------------------|--------------------|------------------|------|-------------------|-----------------|-------------------|------------------|-------------------|------------------|---|
| 1 | 130.049869        | 65.528572       |                    |                   | 112.039304         | 56.523290        | E    |                   |                 |                   |                  |                   |                  | 9 |
| 2 | <b>569.275195</b> | 285.141236      | 552.248646         | 276.627961        | <b>551.264630</b>  | 276.135953       | Q    | 1184.572834       | 592.790055      | 1167.546285       | 584.276780       | 1166.562269       | 583.784772       | 8 |
| 3 | 697.333773        | 349.170525      | 680.307224         | 340.657250        | <b>679.323208</b>  | 340.165242       | Q    | <b>745.347508</b> | 373.177392      | <b>728.320959</b> | 364.664117       | 727.336943        | 364.172109       | 7 |
| 4 | 812.360716        | 406.683996      | 795.334167         | <b>398.170722</b> | <b>794.350151</b>  | 397.678714       | D    | <b>617.288930</b> | 309.148103      | 600.262381        | 300.634828       | 599.278365        | 300.142820       | 6 |
| 5 | <b>899.392744</b> | 450.200010      | 882.366195         | 441.686736        | <b>881.382179</b>  | 441.194728       | S    | <b>502.261987</b> | 251.634631      | 485.235438        | 243.121357       | <b>484.251422</b> | 242.629349       | 5 |
| 6 | 996.445508        | 498.726392      | 979.418959         | 490.213118        | 978.434943         | 489.721110       | P    | <b>415.229959</b> | 208.118617      | <b>398.203410</b> | 199.605343       |                   |                  | 4 |
| 7 | 1053.466972       | 527.237124      | 1036.440423        | 518.723850        | <b>1035.456407</b> | 518.231841       | G    | <b>318.177195</b> | 159.592235      | 301.150646        | 151.078961       |                   |                  | 3 |
| 8 | 1167.509899       | 584.258587      | <b>1150.483350</b> | 575.745313        | <b>1149.499334</b> | 575.253305       | N    | <b>261.155731</b> | 131.081503      | 244.129182        | 122.568229       |                   |                  | 2 |
| 9 |                   |                 |                    |                   |                    |                  | K    | <b>147.112804</b> | 74.060040       | 130.086255        | 65.546765        |                   |                  | 1 |

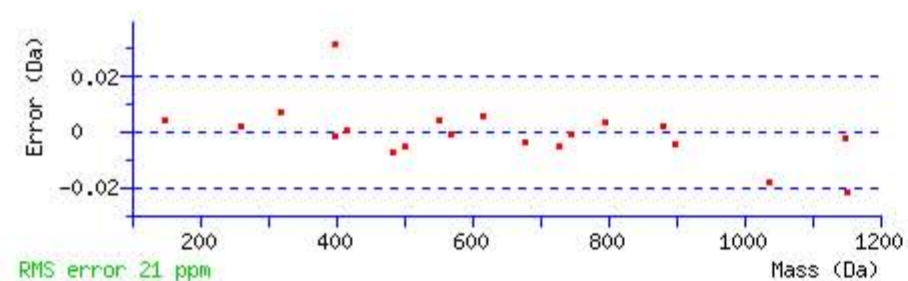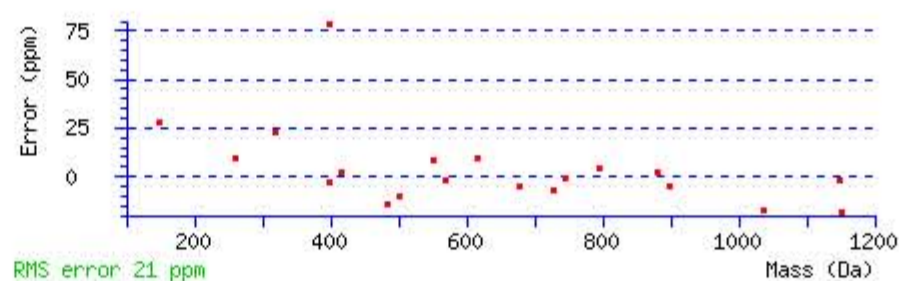

NCBI BLAST search of **EQQDSPGNK**

(Parameters: blastp, nr protein database, expect=20000, no filter, PAM30)

Other BLAST [web gateways](#)

All matches to this query

| Score | Mr(calc):   | Delta     | Sequence                    |
|-------|-------------|-----------|-----------------------------|
| 36.8  | 1312.608139 | -0.015511 | <a href="#">EQQDSPGNK</a>   |
| 18.7  | 1312.608139 | -0.015511 | <a href="#">EQQDSPGNK</a>   |
| 1.1   | 1312.579178 | 0.013450  | <a href="#">QDCETFGMVVK</a> |
| 0.2   | 1312.601624 | -0.008996 | <a href="#">CGECGKAFTK</a>  |

Mascot: <http://www.matrixscience.com/>

# MASCOT Search Results

## Peptide View

MS/MS Fragmentation of **LGNQEPGGQTALK**

Found in **A2AP\_HUMAN**, Alpha-2-antiplasmin OS=Homo sapiens GN=SERPINF2 PE=1 SV=3

Match to Query 31532: 1622.840608 from(812.427580,2+) rtinseconds(1649) index(29781)

Title: Locus:1.1.1.3237.24 File:"2013-07-02 CLN FXIII 180 min 3rd F 3.wiff"

Data file C:\Program Files (x86)\Matrix Science\Mascot Daemon\mgf9 FXIII 180 min 3rd\mascot\_daemon\_merge.mgf

Click mouse within plot area to zoom in by factor of two about that point

Or, Plot from  to  Da

Label all possible matches  Label matches used for scoring

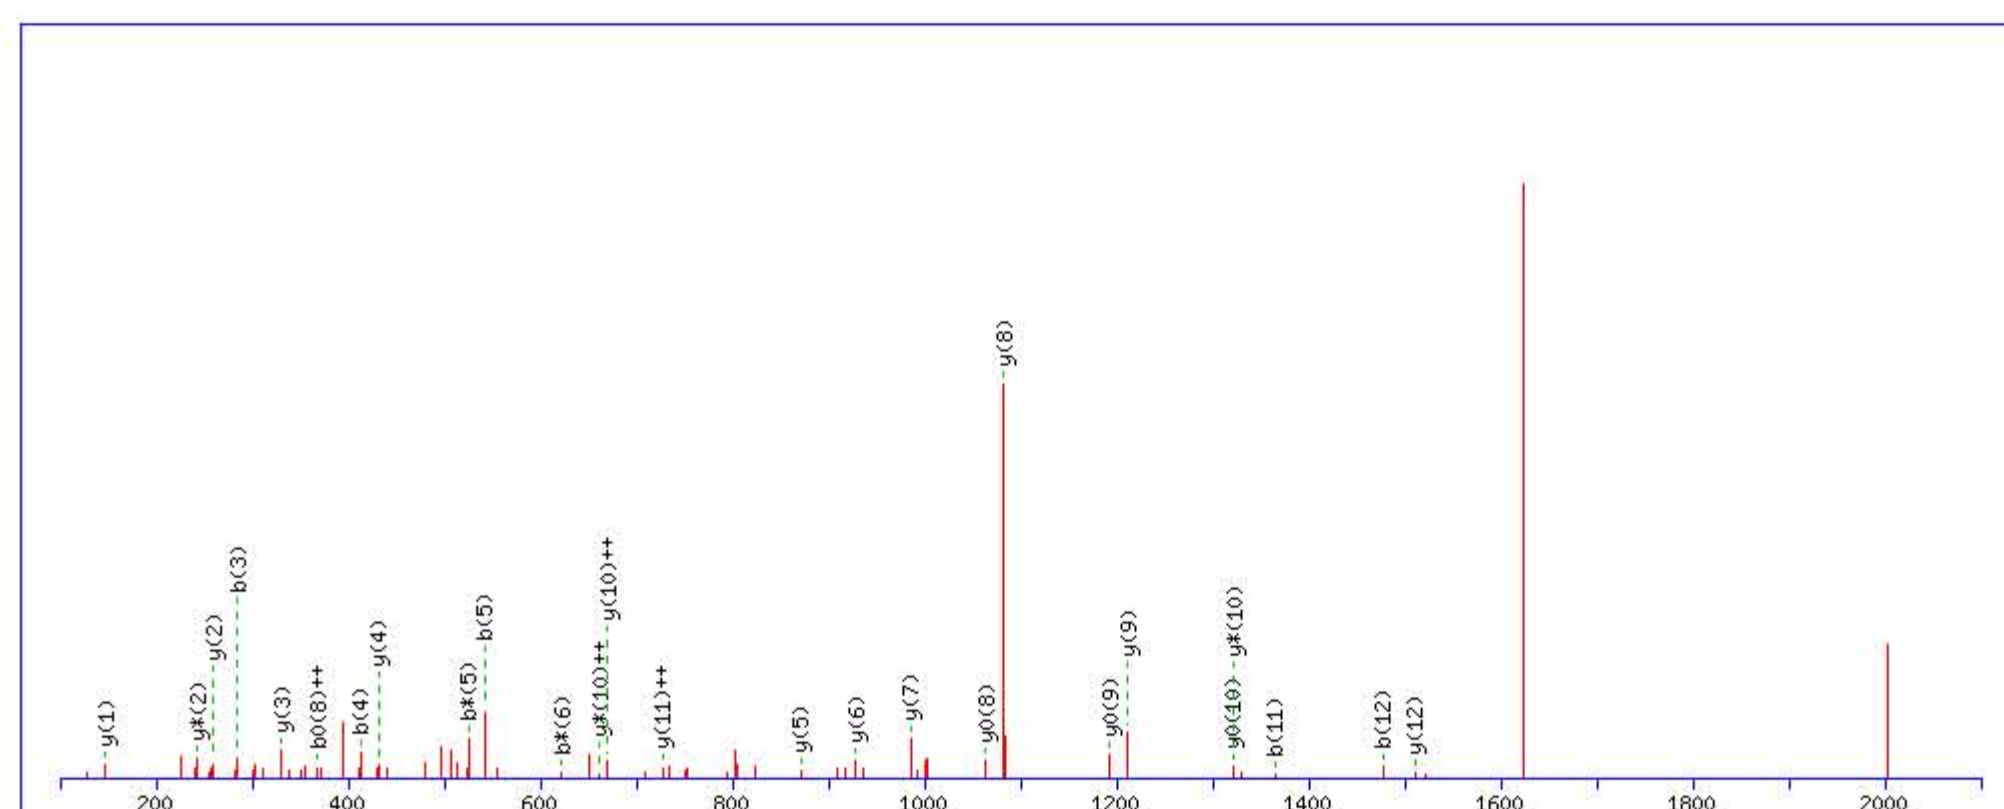

Monoisotopic mass of neutral peptide  $M_r(\text{calc})$ : 1622.845016

Fixed modifications: Carbamidomethyl (C) (apply to specified residues or termini only)

Variable modifications:

Q9 : Biotin:Thermo-21345 (Q)

Ions Score: 55 Expect: 4.6e-005

Matches : 26/126 fragment ions using 58 most intense peaks [\(help\)](#)

| #  | b           | b <sup>++</sup> | b <sup>*</sup> | b <sup>*++</sup> | b <sup>0</sup> | b <sup>0++</sup> | Seq. | y           | y <sup>++</sup> | y <sup>*</sup> | y <sup>*++</sup> | y <sup>0</sup> | y <sup>0++</sup> | #  |
|----|-------------|-----------------|----------------|------------------|----------------|------------------|------|-------------|-----------------|----------------|------------------|----------------|------------------|----|
| 1  | 114.091340  | 57.549308       |                |                  |                |                  | L    |             |                 |                |                  |                |                  | 13 |
| 2  | 171.112804  | 86.060040       |                |                  |                |                  | G    | 1510.768241 | 755.887759      | 1493.741692    | 747.374484       | 1492.757676    | 746.882476       | 12 |
| 3  | 285.155731  | 143.081504      | 268.129182     | 134.568229       |                |                  | N    | 1453.746777 | 727.377027      | 1436.720228    | 718.863752       | 1435.736212    | 718.371744       | 11 |
| 4  | 413.214309  | 207.110793      | 396.187760     | 198.597518       |                |                  | Q    | 1339.703850 | 670.355563      | 1322.677301    | 661.842289       | 1321.693285    | 661.350281       | 10 |
| 5  | 542.256902  | 271.632089      | 525.230353     | 263.118815       | 524.246337     | 262.626807       | E    | 1211.645272 | 606.326274      | 1194.618723    | 597.813000       | 1193.634707    | 597.320991       | 9  |
| 6  | 639.309666  | 320.158471      | 622.283117     | 311.645197       | 621.299101     | 311.153189       | P    | 1082.602679 | 541.804978      | 1065.576130    | 533.291703       | 1064.592114    | 532.799695       | 8  |
| 7  | 696.331130  | 348.669203      | 679.304581     | 340.155929       | 678.320565     | 339.663921       | G    | 985.549915  | 493.278596      | 968.523366     | 484.765321       | 967.539350     | 484.273313       | 7  |
| 8  | 753.352594  | 377.179935      | 736.326045     | 368.666661       | 735.342029     | 368.174653       | G    | 928.528451  | 464.767864      | 911.501902     | 456.254589       | 910.517886     | 455.762581       | 6  |
| 9  | 1192.577920 | 596.792598      | 1175.551371    | 588.279324       | 1174.567355    | 587.787316       | Q    | 871.506987  | 436.257132      | 854.480438     | 427.743857       | 853.496422     | 427.251849       | 5  |
| 10 | 1293.625599 | 647.316438      | 1276.599050    | 638.803163       | 1275.615034    | 638.311155       | T    | 432.281661  | 216.644468      | 415.255112     | 208.131194       | 414.271096     | 207.639186       | 4  |
| 11 | 1364.662713 | 682.834995      | 1347.636164    | 674.321720       | 1346.652148    | 673.829712       | A    | 331.233982  | 166.120629      | 314.207433     | 157.607354       |                |                  | 3  |
| 12 | 1477.746777 | 739.377027      | 1460.720228    | 730.863752       | 1459.736212    | 730.371744       | L    | 260.196868  | 130.602072      | 243.170319     | 122.088797       |                |                  | 2  |
| 13 |             |                 |                |                  |                |                  | K    | 147.112804  | 74.060040       | 130.086255     | 65.546765        |                |                  | 1  |

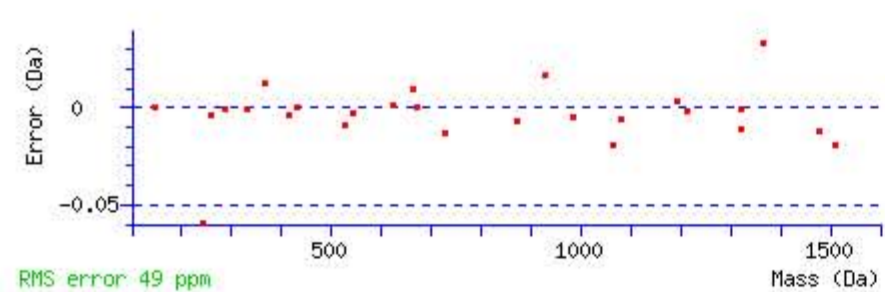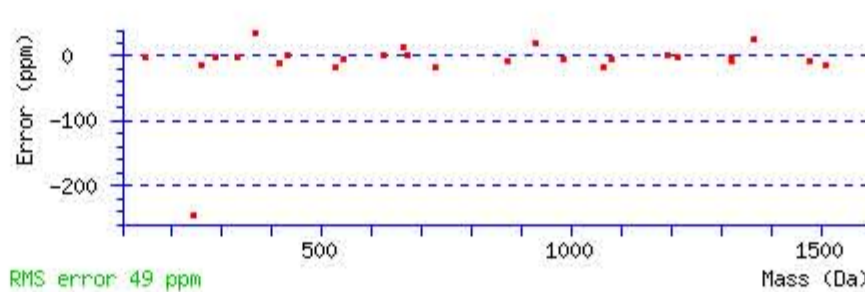

NCBI BLAST search of **LGNQEPGGQTALK**

(Parameters: blastp, nr protein database, expect=20000, no filter, PAM30)

Other BLAST [web gateways](#)

All matches to this query

| Score | $M_r(\text{calc})$ : | Delta     | Sequence                        |
|-------|----------------------|-----------|---------------------------------|
| 54.6  | 1622.845016          | -0.004408 | <a href="#">LGNQEPGGQTALK</a>   |
| 10.8  | 1622.845016          | -0.004408 | <a href="#">LGNQEPGGQTALK</a>   |
| 7.8   | 1622.858917          | -0.018309 | <a href="#">SVLLMELEVNYGLK</a>  |
| 6.2   | 1622.820511          | 0.020097  | <a href="#">FPPEASGYLHIGHAK</a> |
| 4.3   | 1622.833771          | 0.006837  | <a href="#">LDLAGRDLTDYLMK</a>  |
| 1.5   | 1622.849045          | -0.008437 | <a href="#">IPMPDFDLHLKGPKE</a> |
| 0.9   | 1622.860260          | -0.019652 | <a href="#">EHSAFQAPAVKK</a>    |
| 0.9   | 1622.819855          | 0.020753  | <a href="#">NSSPRMPHLAVATDK</a> |
| 0.3   | 1622.864288          | -0.023680 | <a href="#">FPLPSMYRALVWK</a>   |
| 0.0   | 1622.827713          | 0.012895  | <a href="#">GLTPREFNSYGARR</a>  |

# Mascot Search Results

## Peptide View

MS/MS Fragmentation of **QLTSGPNQEQVSPLTLK**

Found in **A2AP\_HUMAN**, Alpha-2-antiplasmin OS=Homo sapiens GN=SERPINF2 PE=1 SV=3

Match to Query 33964: 2574.425112 from(859.148980,3+) rtinseconds(2690) index(8646)

Title: Locus:1.1.1.3456.13 File:"2013-07-02 CLN FXIII 180 min 3rd F 1.wiff"

Data file C:\Program Files (x86)\Matrix Science\Mascot Daemon\mgf\9 FXIII 180 min 3rd\mascot\_daemon\_merge.mgf

Click mouse within plot area to zoom in by factor of two about that point

Or, Plot from  to  Da

Label all possible matches  Label matches used for scoring

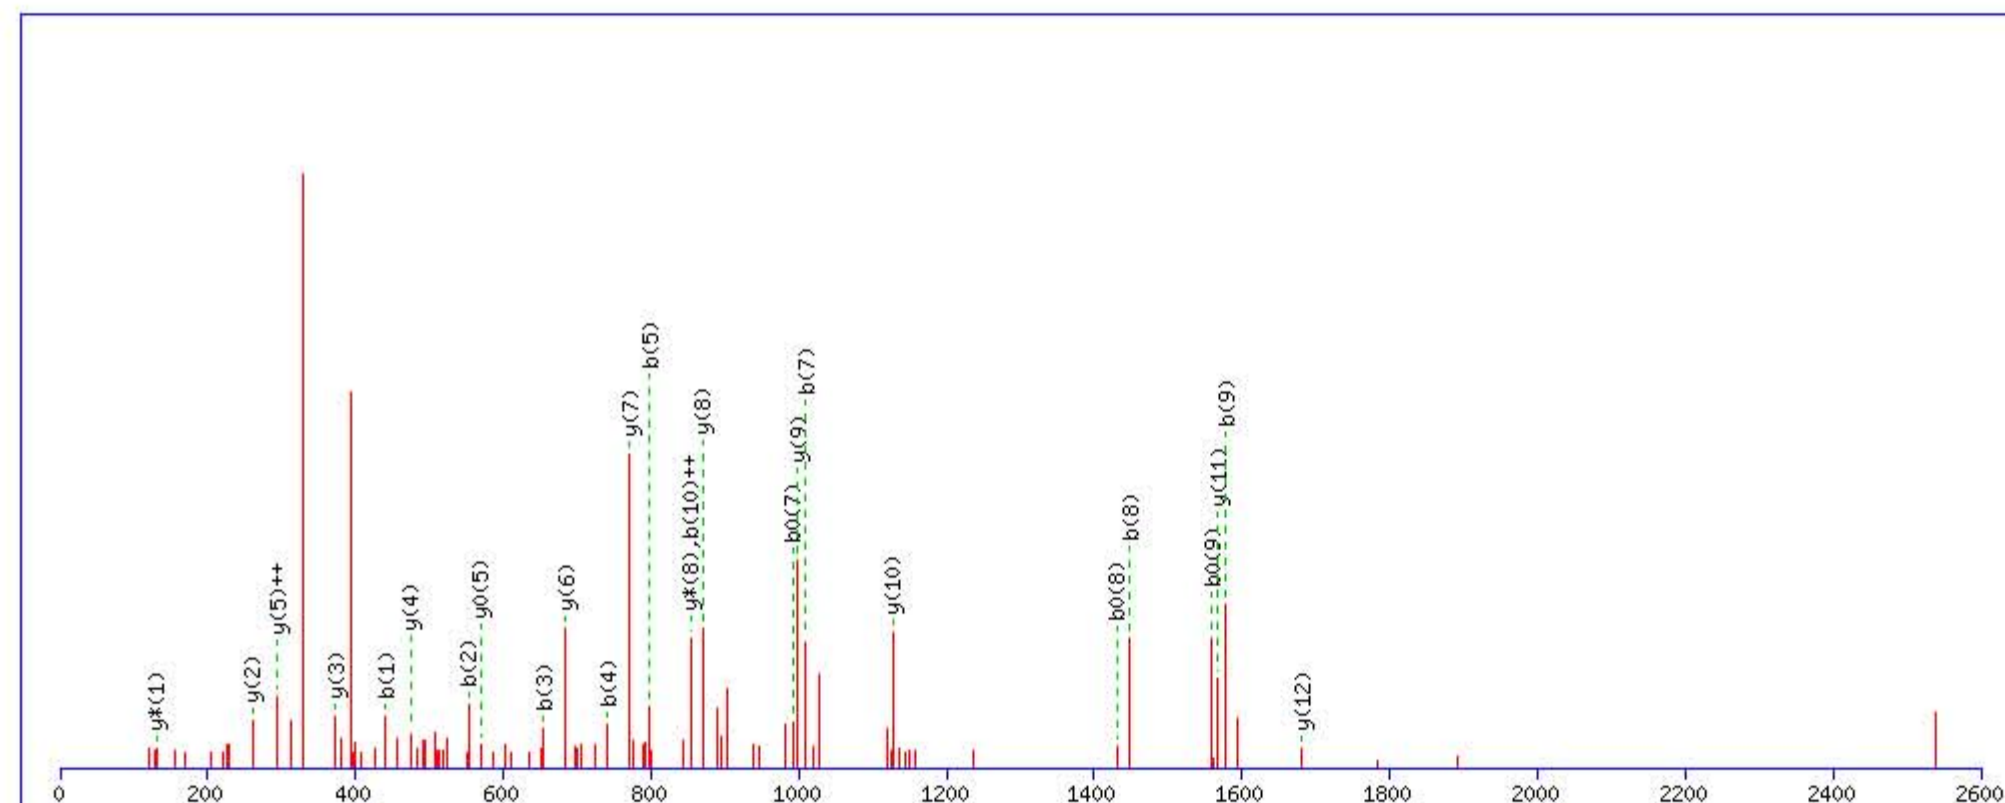

Monoisotopic mass of neutral peptide Mr(calc): 2574.391342

Fixed modifications: Carbamidomethyl (C) (apply to specified residues or termini only)

Variable modifications:

Q1 : Biotin:Thermo-21345 (Q)

Q8 : Biotin:Thermo-21345 (Q)

Ions Score: 68 Expect: 3e-006

Matches : 26/194 fragment ions using 42 most intense peaks [\(help\)](#)

| #  | b                  | b <sup>++</sup>   | b <sup>*</sup> | b <sup>+++</sup> | b <sup>0</sup>     | b <sup>0++</sup> | Seq. | y                  | y <sup>++</sup>   | y <sup>*</sup>    | y <sup>+++</sup> | y <sup>0</sup>    | y <sup>0++</sup> | #  |
|----|--------------------|-------------------|----------------|------------------|--------------------|------------------|------|--------------------|-------------------|-------------------|------------------|-------------------|------------------|----|
| 1  | <b>440.232602</b>  | 220.619939        | 423.206053     | 212.106664       |                    |                  | Q    |                    |                   |                   |                  |                   |                  | 18 |
| 2  | <b>553.316666</b>  | 277.161971        | 536.290117     | 268.648697       |                    |                  | L    | 2136.173304        | 1068.590290       | 2119.146755       | 1060.077015      | 2118.162739       | 1059.585007      | 17 |
| 3  | <b>654.364345</b>  | 327.685811        | 637.337796     | 319.172536       | 636.353780         | 318.680528       | T    | 2023.089240        | 1012.048258       | 2006.062691       | 1003.534984      | 2005.078675       | 1003.042976      | 16 |
| 4  | <b>741.396373</b>  | 371.201825        | 724.369824     | 362.688550       | 723.385808         | 362.196542       | S    | 1922.041561        | 961.524419        | 1905.015012       | 953.011144       | 1904.030996       | 952.519136       | 15 |
| 5  | <b>798.417837</b>  | 399.712557        | 781.391288     | 391.199282       | 780.407272         | 390.707274       | G    | 1835.009533        | 918.008405        | 1817.982984       | 909.495130       | 1816.998968       | 909.003122       | 14 |
| 6  | 895.470601         | 448.238939        | 878.444052     | 439.725664       | 877.460036         | 439.233656       | P    | 1777.988069        | 889.497673        | 1760.961520       | 880.984398       | 1759.977504       | 880.492390       | 13 |
| 7  | <b>1009.513528</b> | 505.260402        | 992.486979     | 496.747128       | <b>991.502963</b>  | 496.255120       | N    | <b>1680.935305</b> | 840.971291        | 1663.908756       | 832.458016       | 1662.924740       | 831.966008       | 12 |
| 8  | <b>1448.738854</b> | 724.873065        | 1431.712305    | 716.359791       | <b>1430.728289</b> | 715.867782       | Q    | <b>1566.892378</b> | 783.949827        | 1549.865829       | 775.436553       | 1548.881813       | 774.944545       | 11 |
| 9  | <b>1577.781447</b> | 789.394362        | 1560.754898    | 780.881087       | <b>1559.770882</b> | 780.389079       | E    | <b>1127.667052</b> | 564.337164        | 1110.640503       | 555.823890       | 1109.656487       | 555.331882       | 10 |
| 10 | 1705.840025        | <b>853.423651</b> | 1688.813476    | 844.910376       | 1687.829460        | 844.418368       | Q    | <b>998.624459</b>  | 499.815868        | 981.597910        | 491.302593       | 980.613894        | 490.810585       | 9  |
| 11 | 1804.908439        | 902.957858        | 1787.881890    | 894.444583       | 1786.897874        | 893.952575       | V    | <b>870.565881</b>  | 435.786579        | <b>853.539332</b> | 427.273304       | 852.555316        | 426.781296       | 8  |
| 12 | 1891.940467        | 946.473872        | 1874.913918    | 937.960597       | 1873.929902        | 937.468589       | S    | <b>771.497467</b>  | 386.252372        | 754.470918        | 377.739097       | 753.486902        | 377.247089       | 7  |
| 13 | 1988.993231        | 995.000254        | 1971.966682    | 986.486979       | 1970.982666        | 985.994971       | P    | <b>684.465439</b>  | 342.736358        | 667.438890        | 334.223083       | 666.454874        | 333.731075       | 6  |
| 14 | 2102.077295        | 1051.542285       | 2085.050746    | 1043.029011      | 2084.066730        | 1042.537003      | L    | 587.412675         | <b>294.209976</b> | 570.386126        | 285.696701       | <b>569.402110</b> | 285.204693       | 5  |
| 15 | 2203.124974        | 1102.066125       | 2186.098425    | 1093.552850      | 2185.114409        | 1093.060842      | T    | <b>474.328611</b>  | 237.667944        | 457.302062        | 229.154669       | 456.318046        | 228.662661       | 4  |
| 16 | 2316.209038        | 1158.608157       | 2299.182489    | 1150.094882      | 2298.198473        | 1149.602874      | L    | <b>373.280932</b>  | 187.144104        | 356.254383        | 178.630830       |                   |                  | 3  |
| 17 | 2429.293102        | 1215.150189       | 2412.266553    | 1206.636914      | 2411.282537        | 1206.144906      | L    | <b>260.196868</b>  | 130.602072        | 243.170319        | 122.088798       |                   |                  | 2  |
| 18 |                    |                   |                |                  |                    |                  | K    | 147.112804         | 74.060040         | <b>130.086255</b> | 65.546765        |                   |                  | 1  |

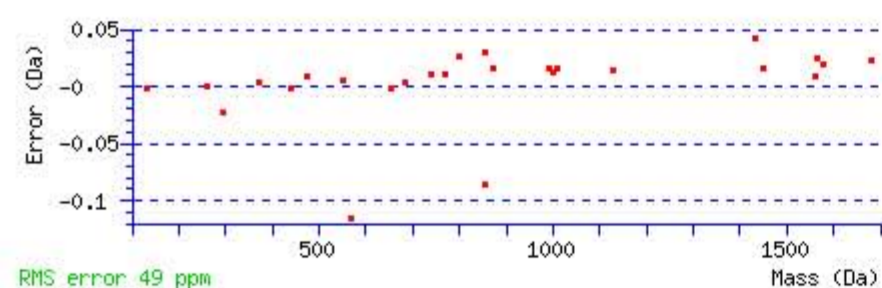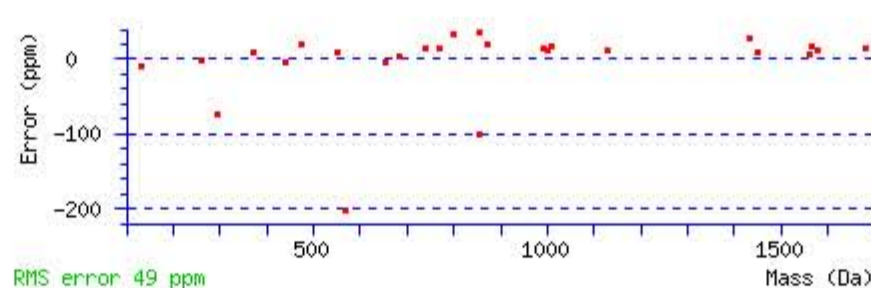

NCBI BLAST search of [QLTSGPNQEQVSPLTLK](#)

(Parameters: blastp, nr protein database, expect=20000, no filter, PAM30)

Other BLAST [web gateways](#)

All matches to this query

| Score | Mr(calc):   | Delta    | Sequence                          |
|-------|-------------|----------|-----------------------------------|
| 68.5  | 2574.391342 | 0.033770 | <a href="#">QLTSGPNQEQVSPLTLK</a> |
| 40.6  | 2574.391342 | 0.033770 | <a href="#">QLTSGPNQEQVSPLTLK</a> |
| 5.2   | 2574.391342 | 0.033770 | <a href="#">QLTSGPNQEQVSPLTLK</a> |

# MASCOT Search Results

## Peptide View

MS/MS Fragmentation of **LGNQEPGGQTALK**

Found in **A2AP\_HUMAN**, Alpha-2-antiplasmin OS=Homo sapiens GN=SERPINF2 PE=1 SV=3

Match to Query 38078: 1934.009622 from(645.677150,3+) rtinseconds(2001) index(46077)

Title: Locus:1.1.1.3409.13 File:"2013-07-02 CLN FXIII 180 min 3rd F 4.wiff"

Data file C:\Program Files (x86)\Matrix Science\Mascot Daemon\mgf\9 FXIII 180 min 3rd\mascot\_daemon\_merge.mgf

Click mouse within plot area to zoom in by factor of two about that point

Or, Plot from  to  Da

Label all possible matches  Label matches used for scoring

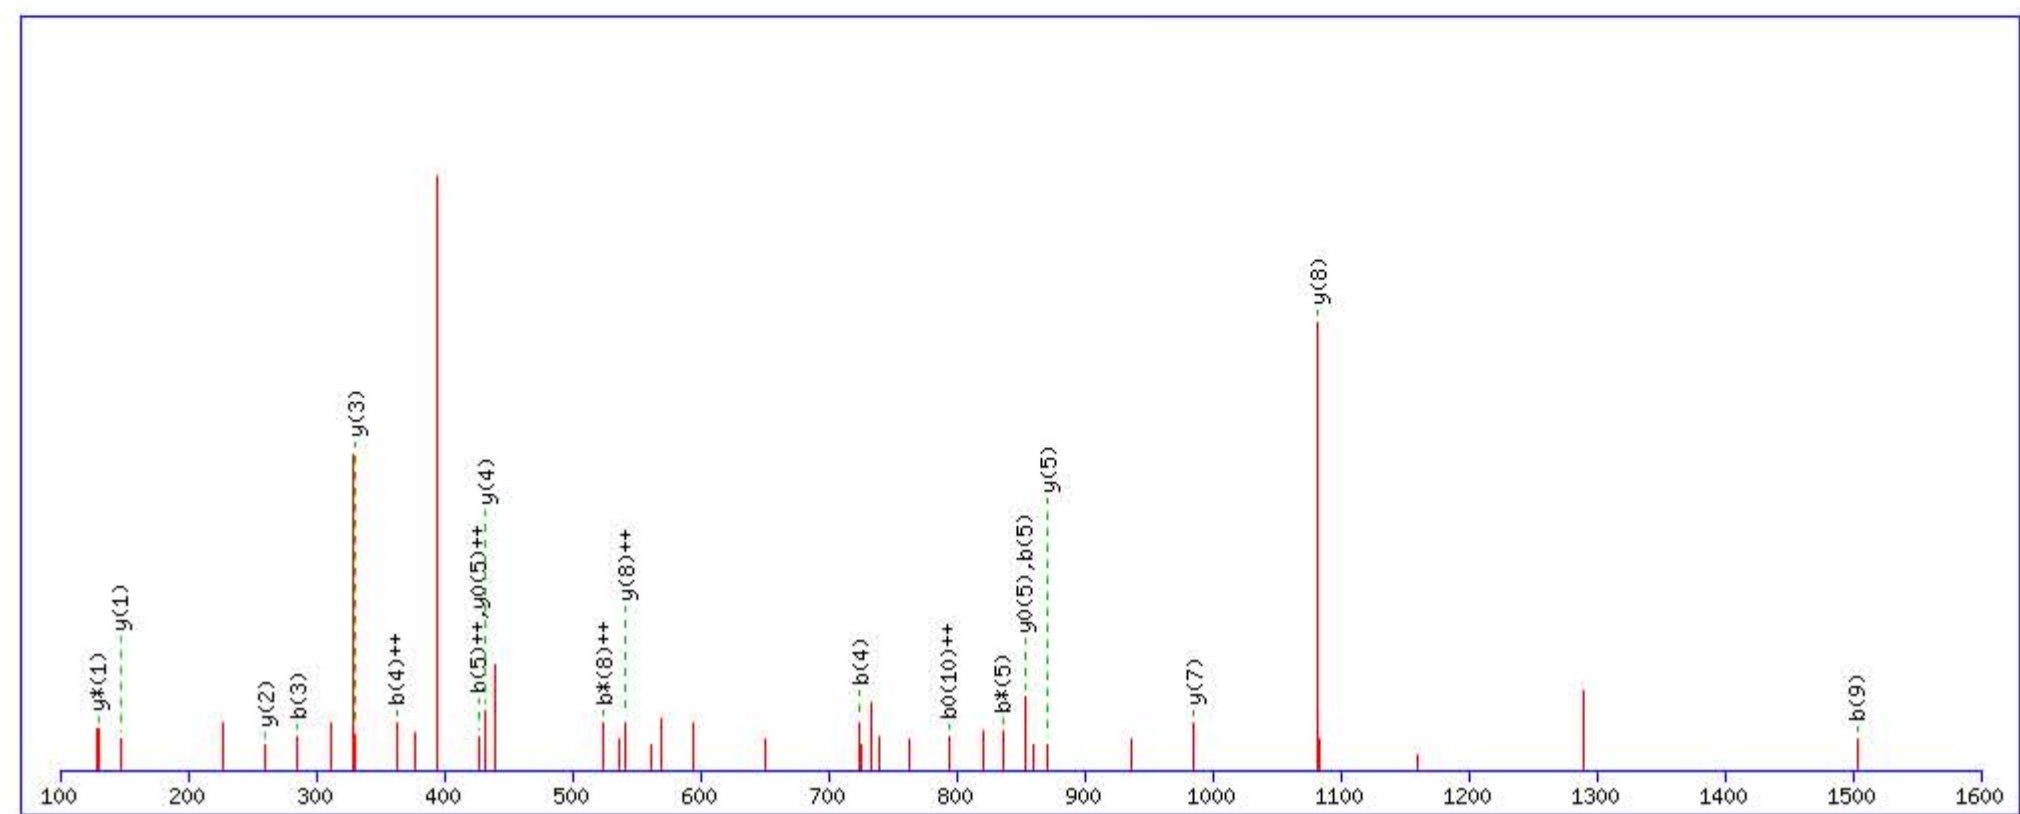

Monoisotopic mass of neutral peptide Mr(calc): 1934.011765

Fixed modifications: Carbamidomethyl (C) (apply to specified residues or termini only)

Variable modifications:

Q4 : Biotin:Thermo-21345 (Q)

Q9 : Biotin:Thermo-21345 (Q)

Ions Score: 26 Expect: 0.065

Matches : 20/126 fragment ions using 40 most intense peaks [\(help\)](#)

| #  | b                  | b <sup>++</sup>   | b <sup>*</sup>    | b <sup>*++</sup>  | b <sup>0</sup> | b <sup>0++</sup>  | Seq. | y                  | y <sup>++</sup>   | y <sup>*</sup>    | y <sup>*++</sup> | y <sup>0</sup>    | y <sup>0++</sup>  | #  |
|----|--------------------|-------------------|-------------------|-------------------|----------------|-------------------|------|--------------------|-------------------|-------------------|------------------|-------------------|-------------------|----|
| 1  | 114.091340         | 57.549308         |                   |                   |                |                   | L    |                    |                   |                   |                  |                   |                   | 13 |
| 2  | 171.112804         | 86.060040         |                   |                   |                |                   | G    | 1821.934989        | 911.471133        | 1804.908440       | 902.957858       | 1803.924424       | 902.465850        | 12 |
| 3  | <b>285.155731</b>  | 143.081504        | 268.129182        | 134.568229        |                |                   | N    | 1764.913525        | 882.960400        | 1747.886976       | 874.447126       | 1746.902960       | 873.955118        | 11 |
| 4  | <b>724.381057</b>  | <b>362.694167</b> | 707.354508        | 354.180892        |                |                   | Q    | 1650.870598        | 825.938937        | 1633.844049       | 817.425663       | 1632.860033       | 816.933654        | 10 |
| 5  | <b>853.423650</b>  | <b>427.215463</b> | <b>836.397101</b> | 418.702189        | 835.413085     | 418.210181        | E    | 1211.645272        | 606.326274        | 1194.618723       | 597.813000       | 1193.634707       | 597.320991        | 9  |
| 6  | 950.476414         | 475.741845        | 933.449865        | 467.228571        | 932.465849     | 466.736563        | P    | <b>1082.602679</b> | <b>541.804977</b> | 1065.576130       | 533.291703       | 1064.592114       | 532.799695        | 8  |
| 7  | 1007.497878        | 504.252577        | 990.471329        | 495.739303        | 989.487313     | 495.247295        | G    | <b>985.549915</b>  | 493.278595        | 968.523366        | 484.765321       | 967.539350        | 484.273313        | 7  |
| 8  | 1064.519342        | 532.763309        | 1047.492793       | <b>524.250035</b> | 1046.508777    | 523.758027        | G    | 928.528451         | 464.767863        | 911.501902        | 456.254589       | 910.517886        | 455.762581        | 6  |
| 9  | <b>1503.744668</b> | 752.375972        | 1486.718119       | 743.862698        | 1485.734103    | 743.370690        | Q    | <b>871.506987</b>  | 436.257132        | 854.480438        | 427.743857       | <b>853.496422</b> | <b>427.251849</b> | 5  |
| 10 | 1604.792347        | 802.899812        | 1587.765798       | 794.386537        | 1586.781782    | <b>793.894529</b> | T    | <b>432.281661</b>  | 216.644468        | 415.255112        | 208.131194       | 414.271096        | 207.639186        | 4  |
| 11 | 1675.829461        | 838.418369        | 1658.802912       | 829.905094        | 1657.818896    | 829.413086        | A    | <b>331.233982</b>  | 166.120629        | 314.207433        | 157.607354       |                   |                   | 3  |
| 12 | 1788.913525        | 894.960400        | 1771.886976       | 886.447126        | 1770.902960    | 885.955118        | L    | <b>260.196868</b>  | 130.602072        | 243.170319        | 122.088797       |                   |                   | 2  |
| 13 |                    |                   |                   |                   |                |                   | K    | <b>147.112804</b>  | 74.060040         | <b>130.086255</b> | 65.546765        |                   |                   | 1  |

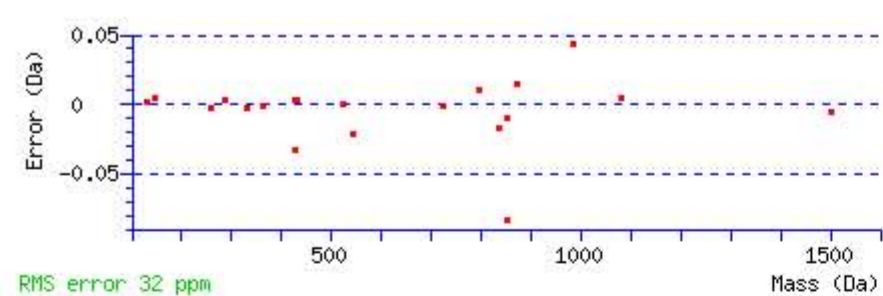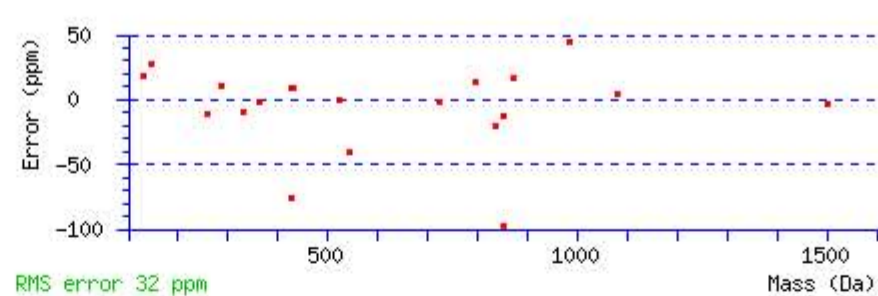

NCBI BLAST search of **LGNQEPGGQTALK**

(Parameters: blastp, nr protein database, expect=20000, no filter, PAM30)

Other BLAST [web gateways](#)

All matches to this query

| Score | Mr(calc):   | Delta     | Sequence                          |
|-------|-------------|-----------|-----------------------------------|
| 25.7  | 1934.011765 | -0.002143 | <a href="#">LGNQEPGGQTALK</a>     |
| 13.7  | 1934.032867 | -0.023245 | <a href="#">KSRPLTGLMDLAKEMTK</a> |
| 1.7   | 1933.982758 | 0.026864  | <a href="#">TVSKLNQEIWMMK</a>     |
| 1.3   | 1933.982758 | 0.026864  | <a href="#">TVSKLNQEIWMMK</a>     |



# MASCOT Search Results

## Peptide View

MS/MS Fragmentation of **EQQDSPGNKDFLQSLK**

Found in **A2AP\_HUMAN**, Alpha-2-antiplasmin OS=Homo sapiens GN=SERPINF2 PE=1 SV=3

Match to Query 42233: 2144.069172 from(715.697000,3+) rtinseconds(2080) index(5364)

Title: Locus:1.1.1.3244.8 File:"2013-07-02 CLN FXIII 180 min 3rd F 1.wiff"

Data file C:\Program Files (x86)\Matrix Science\Mascot Daemon\mgf\9 FXIII 180 min 3rd\mascot\_daemon\_merge.mgf

Click mouse within plot area to zoom in by factor of two about that point

Or, Plot from  to  Da

Label all possible matches  Label matches used for scoring

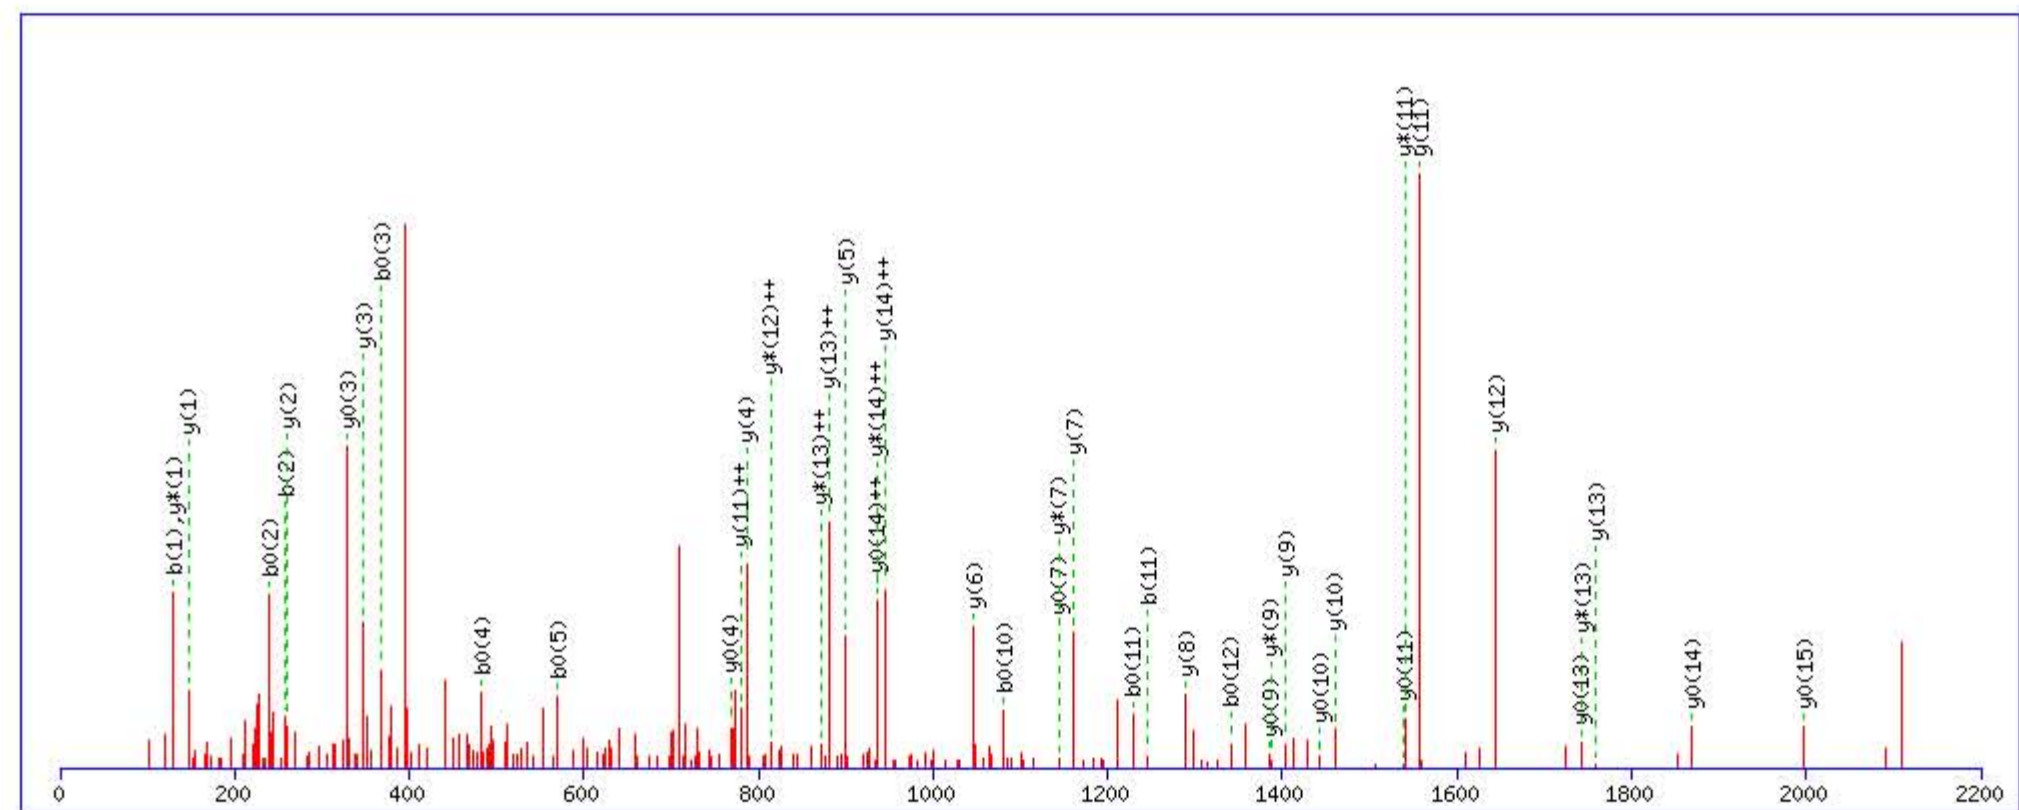

Monoisotopic mass of neutral peptide Mr(calc): 2144.057190

Fixed modifications: Carbamidomethyl (C) (apply to specified residues or termini only)

Variable modifications:

Q13 : Biotin:Thermo-21345 (Q)

Ions Score: 52 Expect: 0.00018

Matches : 44/174 fragment ions using 114 most intense peaks [\(help\)](#)

| #  | b           | b <sup>++</sup> | b <sup>+</sup> | b <sup>+++</sup> | b <sup>0</sup> | b <sup>0++</sup> | Seq. | y           | y <sup>++</sup> | y <sup>+</sup> | y <sup>+++</sup> | y <sup>0</sup> | y <sup>0++</sup> | #  |
|----|-------------|-----------------|----------------|------------------|----------------|------------------|------|-------------|-----------------|----------------|------------------|----------------|------------------|----|
| 1  | 130.049869  | 65.528572       |                |                  | 112.039304     | 56.523290        | E    |             |                 |                |                  |                |                  | 16 |
| 2  | 258.108447  | 129.557862      | 241.081898     | 121.044587       | 240.097882     | 120.552579       | Q    | 2016.021888 | 1008.514582     | 1998.995339    | 1000.001308      | 1998.011323    | 999.509300       | 15 |
| 3  | 386.167025  | 193.587151      | 369.140476     | 185.073876       | 368.156460     | 184.581868       | Q    | 1887.963310 | 944.485293      | 1870.936761    | 935.972019       | 1869.952745    | 935.480011       | 14 |
| 4  | 501.193968  | 251.100622      | 484.167419     | 242.587348       | 483.183403     | 242.095340       | D    | 1759.904732 | 880.456004      | 1742.878183    | 871.942730       | 1741.894167    | 871.450722       | 13 |
| 5  | 588.225996  | 294.616636      | 571.199447     | 286.103362       | 570.215431     | 285.611354       | S    | 1644.877789 | 822.942533      | 1627.851240    | 814.429258       | 1626.867224    | 813.937250       | 12 |
| 6  | 685.278760  | 343.143018      | 668.252211     | 334.629744       | 667.268195     | 334.137736       | P    | 1557.845761 | 779.426519      | 1540.819212    | 770.913244       | 1539.835196    | 770.421236       | 11 |
| 7  | 742.300224  | 371.653750      | 725.273675     | 363.140476       | 724.289659     | 362.648468       | G    | 1460.792997 | 730.900137      | 1443.766448    | 722.386862       | 1442.782432    | 721.894854       | 10 |
| 8  | 856.343151  | 428.675214      | 839.316602     | 420.161939       | 838.332586     | 419.669931       | N    | 1403.771533 | 702.389405      | 1386.744984    | 693.876130       | 1385.760968    | 693.384122       | 9  |
| 9  | 984.438114  | 492.722695      | 967.411565     | 484.209421       | 966.427549     | 483.717413       | K    | 1289.728606 | 645.367941      | 1272.702057    | 636.854667       | 1271.718041    | 636.362659       | 8  |
| 10 | 1099.465057 | 550.236167      | 1082.438508    | 541.722892       | 1081.454492    | 541.230884       | D    | 1161.633643 | 581.320460      | 1144.607094    | 572.807185       | 1143.623078    | 572.315177       | 7  |
| 11 | 1246.533471 | 623.770374      | 1229.506922    | 615.257099       | 1228.522906    | 614.765091       | F    | 1046.606700 | 523.806988      | 1029.580151    | 515.293714       | 1028.596135    | 514.801706       | 6  |
| 12 | 1359.617535 | 680.312406      | 1342.590986    | 671.799131       | 1341.606970    | 671.307123       | L    | 899.538286  | 450.272781      | 882.511737     | 441.759507       | 881.527721     | 441.267499       | 5  |
| 13 | 1798.842861 | 899.925069      | 1781.816312    | 891.411794       | 1780.832296    | 890.919786       | Q    | 786.454222  | 393.730749      | 769.427673     | 385.217475       | 768.443657     | 384.725467       | 4  |
| 14 | 1885.874889 | 943.441083      | 1868.848340    | 934.927808       | 1867.864324    | 934.435800       | S    | 347.228896  | 174.118086      | 330.202347     | 165.604812       | 329.218331     | 165.112804       | 3  |
| 15 | 1998.958953 | 999.983115      | 1981.932404    | 991.469840       | 1980.948388    | 990.977832       | L    | 260.196868  | 130.602072      | 243.170319     | 122.088798       |                |                  | 2  |
| 16 |             |                 |                |                  |                |                  | K    | 147.112804  | 74.060040       | 130.086255     | 65.546766        |                |                  | 1  |

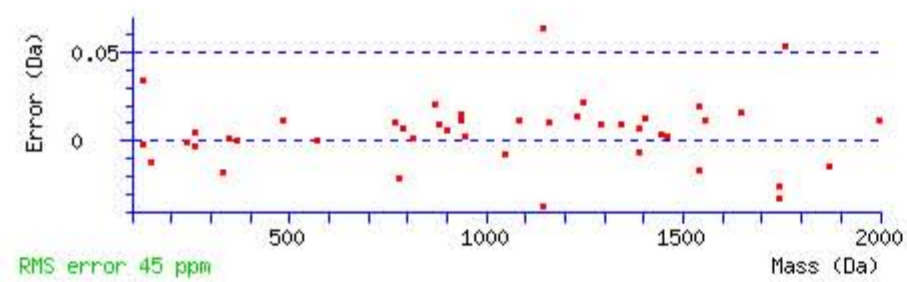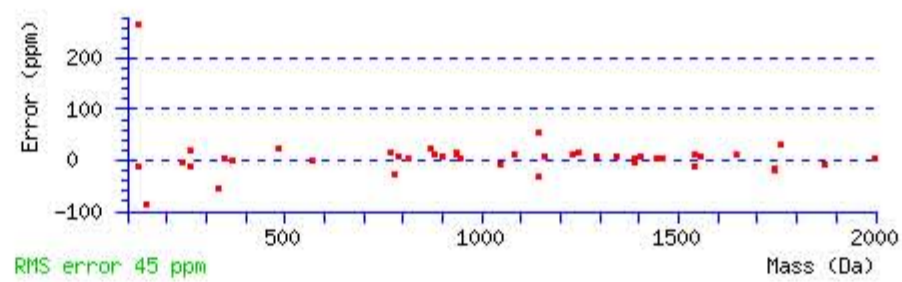

NCBI BLAST search of **EQQDSPGNKDFLQSLK**

(Parameters: blastp, nr protein database, expect=20000, no filter, PAM30)

Other BLAST [web gateways](#)

All matches to this query

| Score | Mr(calc):   | Delta    | Sequence                         |
|-------|-------------|----------|----------------------------------|
| 51.9  | 2144.057190 | 0.011982 | <a href="#">EQQDSPGNKDFLQSLK</a> |

Mascot: <http://www.matrixscience.com/>

# MASCOT Search Results

## Peptide View

MS/MS Fragmentation of **QLTSGPNQEQVSPLTLK**

Found in **A2AP\_HUMAN**, Alpha-2-antiplasmin OS=Homo sapiens GN=SERPINF2 PE=1 SV=3

Match to Query 44416: 2263.244652 from(755.422160,3+) rtinseconds(2572) index(8046)

Title: Locus:1.1.1.3415.12 File:"2013-07-02 CLN FXIII 180 min 3rd F 1.wiff"

Data file C:\Program Files (x86)\Matrix Science\Mascot Daemon\mgf9 FXIII 180 min 3rd\mascot\_daemon\_merge.mgf

Click mouse within plot area to zoom in by factor of two about that point

Or, Plot from  to  Da

Label all possible matches  Label matches used for scoring

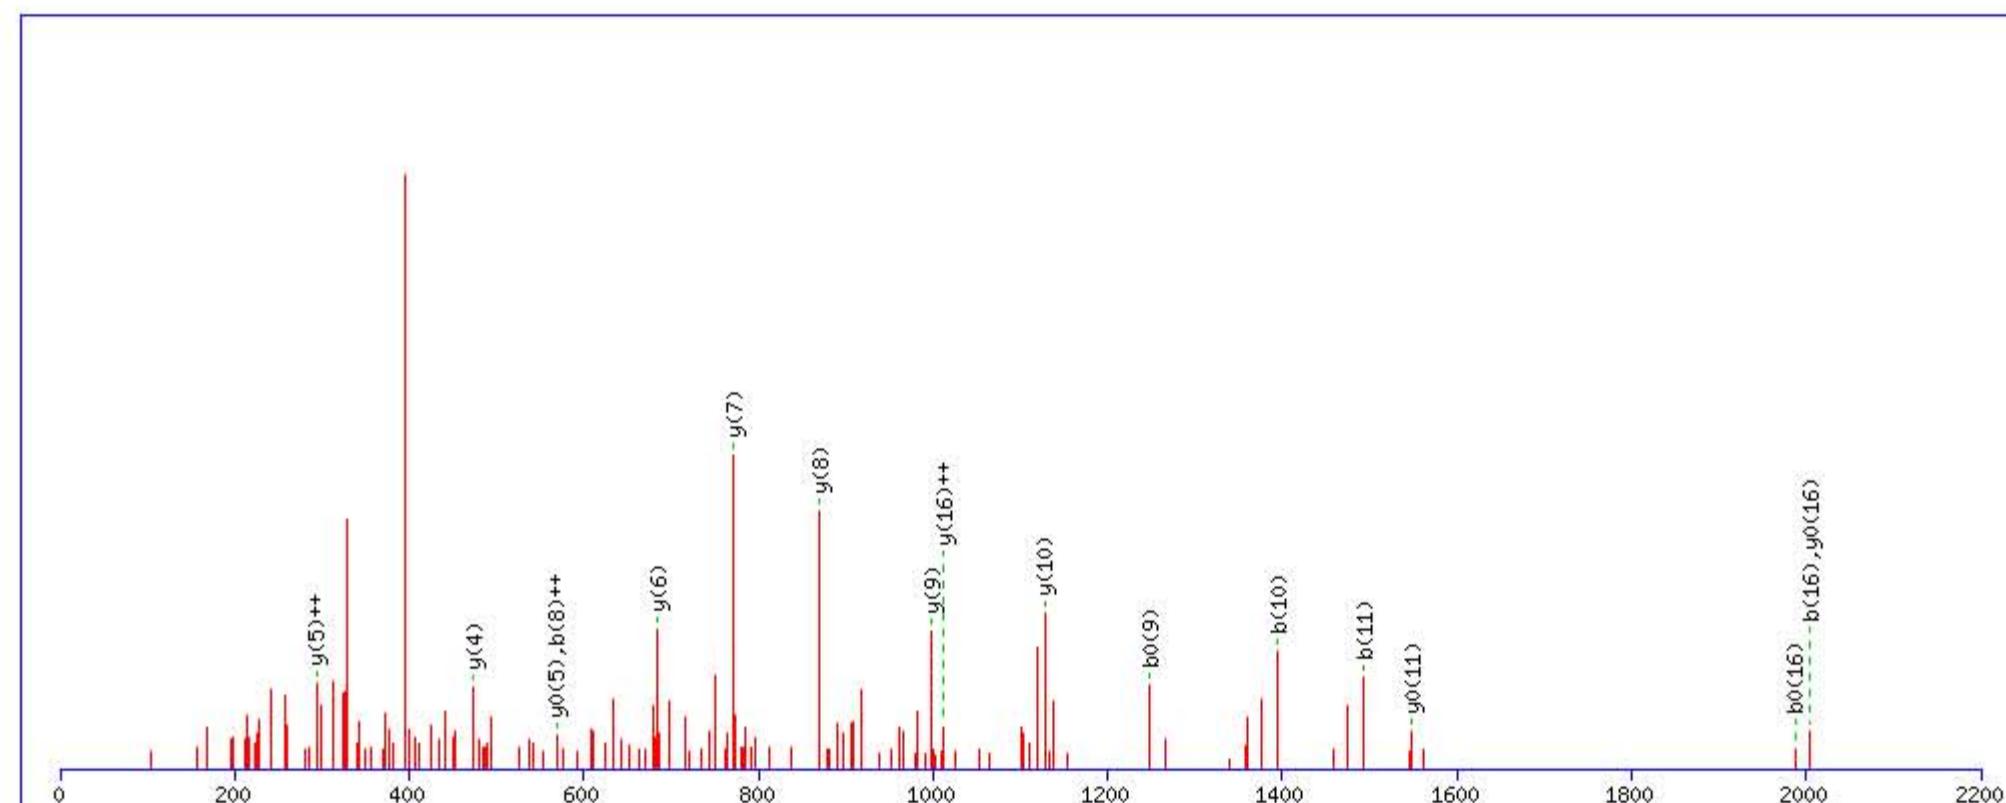

Monoisotopic mass of neutral peptide Mr(calc): 2263.224594

Fixed modifications: Carbamidomethyl (C) (apply to specified residues or termini only)

Variable modifications:

Q8 : Biotin:Thermo-21345 (Q)

Ions Score: 42 Expect: 0.00044

Matches : 17/194 fragment ions using 17 most intense peaks [\(help\)](#)

| #  | b           | b <sup>++</sup> | b <sup>*</sup> | b <sup>*++</sup> | b <sup>0</sup> | b <sup>0++</sup> | Seq. | y           | y <sup>++</sup> | y <sup>*</sup> | y <sup>*++</sup> | y <sup>0</sup> | y <sup>0++</sup> | #  |
|----|-------------|-----------------|----------------|------------------|----------------|------------------|------|-------------|-----------------|----------------|------------------|----------------|------------------|----|
| 1  | 129.065854  | 65.036565       | 112.039305     | 56.523291        |                |                  | Q    |             |                 |                |                  |                |                  | 18 |
| 2  | 242.149918  | 121.578597      | 225.123369     | 113.065323       |                |                  | L    | 2136.173304 | 1068.590290     | 2119.146755    | 1060.077015      | 2118.162739    | 1059.585007      | 17 |
| 3  | 343.197597  | 172.102437      | 326.171048     | 163.589162       | 325.187032     | 163.097154       | T    | 2023.089240 | 1012.048258     | 2006.062691    | 1003.534984      | 2005.078675    | 1003.042976      | 16 |
| 4  | 430.229625  | 215.618450      | 413.203076     | 207.105176       | 412.219060     | 206.613168       | S    | 1922.041561 | 961.524419      | 1905.015012    | 953.011144       | 1904.030996    | 952.519136       | 15 |
| 5  | 487.251089  | 244.129182      | 470.224540     | 235.615908       | 469.240524     | 235.123900       | G    | 1835.009533 | 918.008405      | 1817.982984    | 909.495130       | 1816.998968    | 909.003122       | 14 |
| 6  | 584.303853  | 292.655565      | 567.277304     | 284.142290       | 566.293288     | 283.650282       | P    | 1777.988069 | 889.497673      | 1760.961520    | 880.984398       | 1759.977504    | 880.492390       | 13 |
| 7  | 698.346780  | 349.677028      | 681.320231     | 341.163753       | 680.336215     | 340.671745       | N    | 1680.935305 | 840.971291      | 1663.908756    | 832.458016       | 1662.924740    | 831.966008       | 12 |
| 8  | 1137.572106 | 569.289691      | 1120.545557    | 560.776416       | 1119.561541    | 560.284408       | Q    | 1566.892378 | 783.949827      | 1549.865829    | 775.436553       | 1548.881813    | 774.944545       | 11 |
| 9  | 1266.614699 | 633.810988      | 1249.588150    | 625.297713       | 1248.604134    | 624.805705       | E    | 1127.667052 | 564.337164      | 1110.640503    | 555.823890       | 1109.656487    | 555.331882       | 10 |
| 10 | 1394.673277 | 697.840277      | 1377.646728    | 689.327002       | 1376.662712    | 688.834994       | Q    | 998.624459  | 499.815868      | 981.597910     | 491.302593       | 980.613894     | 490.810585       | 9  |
| 11 | 1493.741691 | 747.374484      | 1476.715142    | 738.861209       | 1475.731126    | 738.369201       | V    | 870.565881  | 435.786579      | 853.539332     | 427.273304       | 852.555316     | 426.781296       | 8  |
| 12 | 1580.773719 | 790.890498      | 1563.747170    | 782.377223       | 1562.763154    | 781.885215       | S    | 771.497467  | 386.252372      | 754.470918     | 377.739097       | 753.486902     | 377.247089       | 7  |
| 13 | 1677.826483 | 839.416880      | 1660.799934    | 830.903605       | 1659.815918    | 830.411597       | P    | 684.465439  | 342.736358      | 667.438890     | 334.223083       | 666.454874     | 333.731075       | 6  |
| 14 | 1790.910547 | 895.958912      | 1773.883998    | 887.445637       | 1772.899982    | 886.953629       | L    | 587.412675  | 294.209976      | 570.386126     | 285.696701       | 569.402110     | 285.204693       | 5  |
| 15 | 1891.958226 | 946.482751      | 1874.931677    | 937.969477       | 1873.947661    | 937.477469       | T    | 474.328611  | 237.667944      | 457.302062     | 229.154669       | 456.318046     | 228.662661       | 4  |
| 16 | 2005.042290 | 1003.024783     | 1988.015741    | 994.511509       | 1987.031725    | 994.019501       | L    | 373.280932  | 187.144104      | 356.254383     | 178.630830       |                |                  | 3  |
| 17 | 2118.126354 | 1059.566815     | 2101.099805    | 1051.053540      | 2100.115789    | 1050.561532      | L    | 260.196868  | 130.602072      | 243.170319     | 122.088798       |                |                  | 2  |
| 18 |             |                 |                |                  |                |                  | K    | 147.112804  | 74.060040       | 130.086255     | 65.546765        |                |                  | 1  |

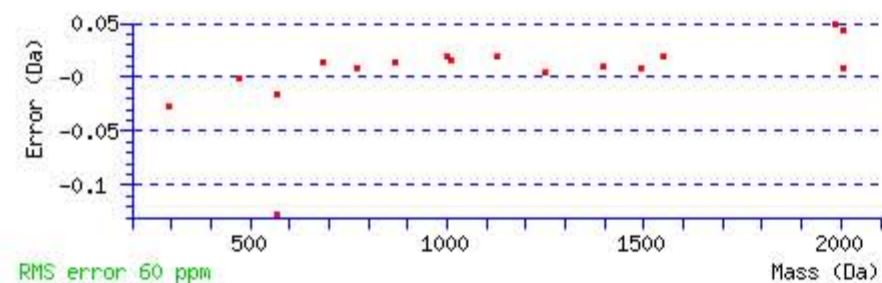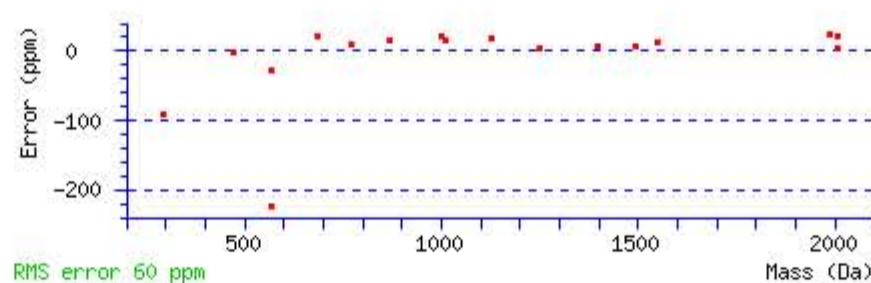

NCBI BLAST search of **QLTSGPNQEQVSPLTLK**

(Parameters: blastp, nr protein database, expect=20000, no filter, PAM30)

Other BLAST [web gateways](#)

All matches to this query

| Score | Mr(calc):   | Delta    | Sequence                             |
|-------|-------------|----------|--------------------------------------|
| 41.8  | 2263.224594 | 0.020058 | <a href="#">QLTSGPNQEQVSPLTLK</a>    |
| 33.4  | 2263.224594 | 0.020058 | <a href="#">QLTSGPNQEQVSPLTLK</a>    |
| 20.5  | 2263.224594 | 0.020058 | <a href="#">QLTSGPNQEQVSPLTLK</a>    |
| 6.0   | 2263.224594 | 0.020058 | <a href="#">GLALSSNKVKSVMVVFENEK</a> |







# MASCOT SCIENCE Mascot Search Results

## Peptide View

MS/MS Fragmentation of **EHAVEGDCDFQLLK**

Found in **FETUA\_HUMAN**, Alpha-2-HS-glycoprotein OS=Homo sapiens GN=AHSG PE=1 SV=1

Match to Query 38806: 1970.922852 from(657.981560,3+) rtinseconds(2098) index(32441)

Title: Locus:1.1.1.3394.8 File:"2013-07-02 CLN FXIII 180 min 3rd F 3.wiff"

Data file C:\Program Files (x86)\Matrix Science\Mascot Daemon\mgf\9 FXIII 180 min 3rd\mascot\_daemon\_merge.mgf

Click mouse within plot area to zoom in by factor of two about that point

Or, Plot from  to  Da

Label all possible matches  Label matches used for scoring

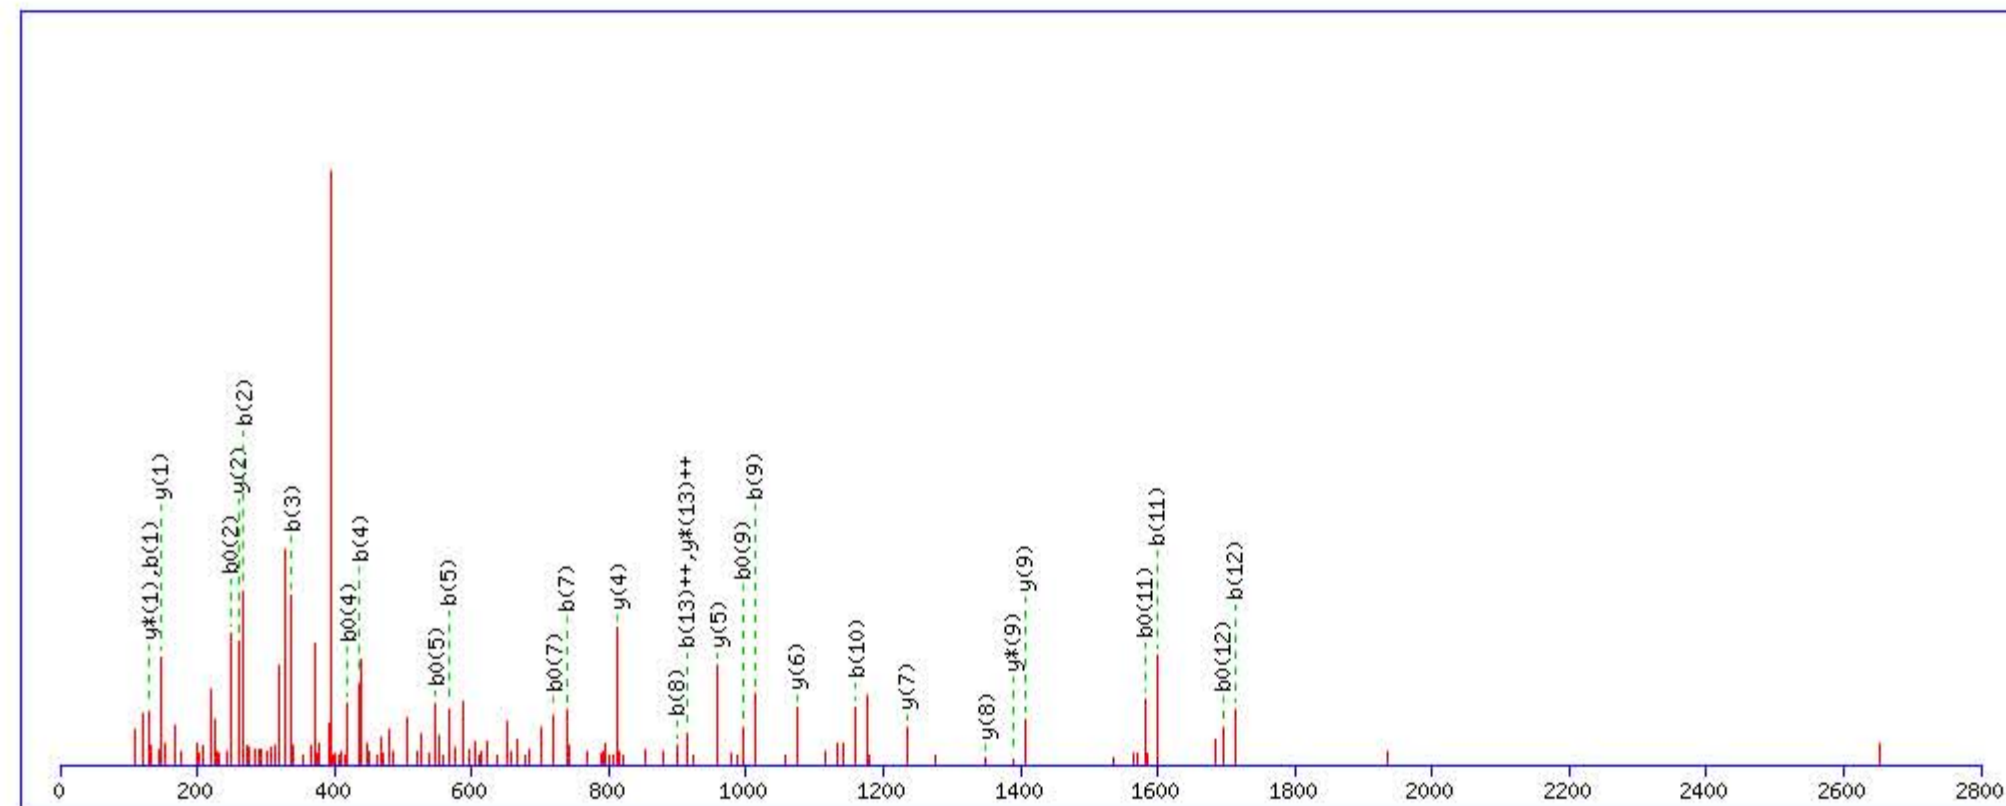

Monoisotopic mass of neutral peptide Mr(calc): 1970.923019

Fixed modifications: Carbamidomethyl (C) (apply to specified residues or termini only)

Variable modifications:

Q11 : Biotin:Thermo-21345 (Q)

Ions Score: 74 Expect: 1.6e-007

Matches : 30/126 fragment ions using 45 most intense peaks [\(help\)](#)

| #  | b           | b <sup>++</sup> | b <sup>+</sup> | b <sup>+++</sup> | b <sup>0</sup> | b <sup>0++</sup> | Seq. | y           | y <sup>++</sup> | y <sup>+</sup> | y <sup>+++</sup> | y <sup>0</sup> | y <sup>0++</sup> | #  |
|----|-------------|-----------------|----------------|------------------|----------------|------------------|------|-------------|-----------------|----------------|------------------|----------------|------------------|----|
| 1  | 130.049869  | 65.528572       |                |                  | 112.039304     | 56.523290        | E    |             |                 |                |                  |                |                  | 14 |
| 2  | 267.108781  | 134.058028      |                |                  | 249.098216     | 125.052746       | H    | 1842.887704 | 921.947490      | 1825.861155    | 913.434216       | 1824.877139    | 912.942207       | 13 |
| 3  | 338.145895  | 169.576585      |                |                  | 320.135330     | 160.571303       | A    | 1705.828792 | 853.418034      | 1688.802243    | 844.904760       | 1687.818227    | 844.412752       | 12 |
| 4  | 437.214309  | 219.110792      |                |                  | 419.203744     | 210.105510       | V    | 1634.791678 | 817.899477      | 1617.765129    | 809.386203       | 1616.781113    | 808.894195       | 11 |
| 5  | 566.256902  | 283.632089      |                |                  | 548.246337     | 274.626807       | E    | 1535.723264 | 768.365270      | 1518.696715    | 759.851996       | 1517.712699    | 759.359988       | 10 |
| 6  | 623.278366  | 312.142821      |                |                  | 605.267801     | 303.137539       | G    | 1406.680671 | 703.843974      | 1389.654122    | 695.330699       | 1388.670106    | 694.838691       | 9  |
| 7  | 738.305309  | 369.656293      |                |                  | 720.294744     | 360.651010       | D    | 1349.659207 | 675.333241      | 1332.632658    | 666.819967       | 1331.648642    | 666.327959       | 8  |
| 8  | 898.335958  | 449.671617      |                |                  | 880.325393     | 440.666335       | C    | 1234.632264 | 617.819770      | 1217.605715    | 609.306496       | 1216.621699    | 608.814488       | 7  |
| 9  | 1013.362901 | 507.185089      |                |                  | 995.352336     | 498.179806       | D    | 1074.601615 | 537.804446      | 1057.575066    | 529.291171       | 1056.591050    | 528.799163       | 6  |
| 10 | 1160.431315 | 580.719296      |                |                  | 1142.420750    | 571.714013       | F    | 959.574672  | 480.290974      | 942.548123     | 471.777700       |                |                  | 5  |
| 11 | 1599.656641 | 800.331959      | 1582.630092    | 791.818684       | 1581.646076    | 791.326676       | Q    | 812.506258  | 406.756767      | 795.479709     | 398.243493       |                |                  | 4  |
| 12 | 1712.740705 | 856.873991      | 1695.714156    | 848.360716       | 1694.730140    | 847.868708       | L    | 373.280932  | 187.144104      | 356.254383     | 178.630829       |                |                  | 3  |
| 13 | 1825.824769 | 913.416023      | 1808.798220    | 904.902748       | 1807.814204    | 904.410740       | L    | 260.196868  | 130.602072      | 243.170319     | 122.088797       |                |                  | 2  |
| 14 |             |                 |                |                  |                |                  | K    | 147.112804  | 74.060040       | 130.086255     | 65.546765        |                |                  | 1  |

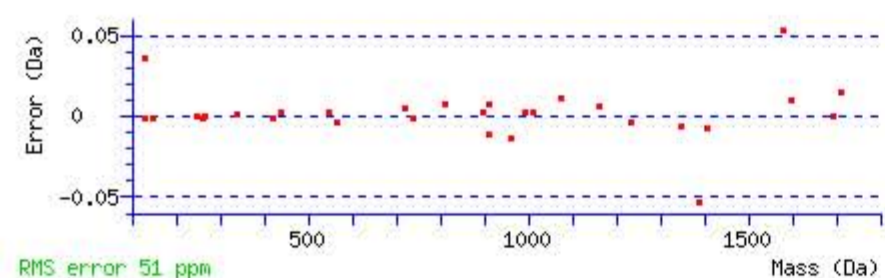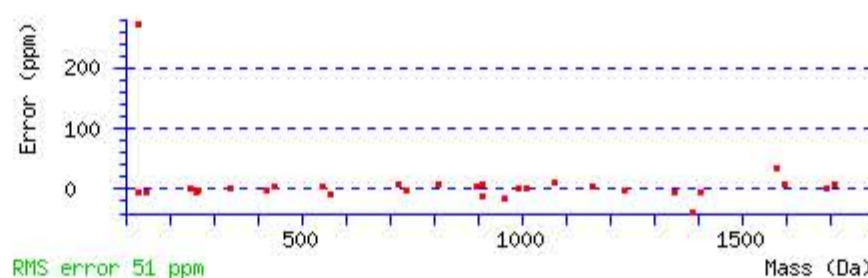

NCBI BLAST search of **EHAVEGDCDFQLLK**

(Parameters: blastp, nr protein database, expect=20000, no filter, PAM30)

Other BLAST [web gateways](#)

All matches to this query

| Score | Mr(calc):   | Delta     | Sequence                         |
|-------|-------------|-----------|----------------------------------|
| 73.6  | 1970.923019 | -0.000167 | <a href="#">EHAVEGDCDFQLLK</a>   |
| 0.9   | 1970.905258 | 0.017594  | <a href="#">LDFNMTTNHFSMCLIK</a> |

Mascot: <http://www.matrixscience.com/>

# MASCOT SCIENCE Mascot Search Results

## Peptide View

MS/MS Fragmentation of **QGIPFFGQVR**

Found in **A2MG\_HUMAN**, Alpha-2-macroglobulin OS=Homo sapiens GN=A2M PE=1 SV=3

Match to Query 26133: 1458.778428 from(730.396490,2+) rtinseconds(2552) index(34922)

Title: Locus:1.1.1.3552.8 File:"2013-07-02 CLN FXIII 180 min 3rd F 3.wiff"

Data file C:\Program Files (x86)\Matrix Science\Mascot Daemon\mgf\9 FXIII 180 min 3rd\mascot\_daemon\_merge.mgf

Click mouse within plot area to zoom in by factor of two about that point

Or, Plot from  to  Da

Label all possible matches  Label matches used for scoring

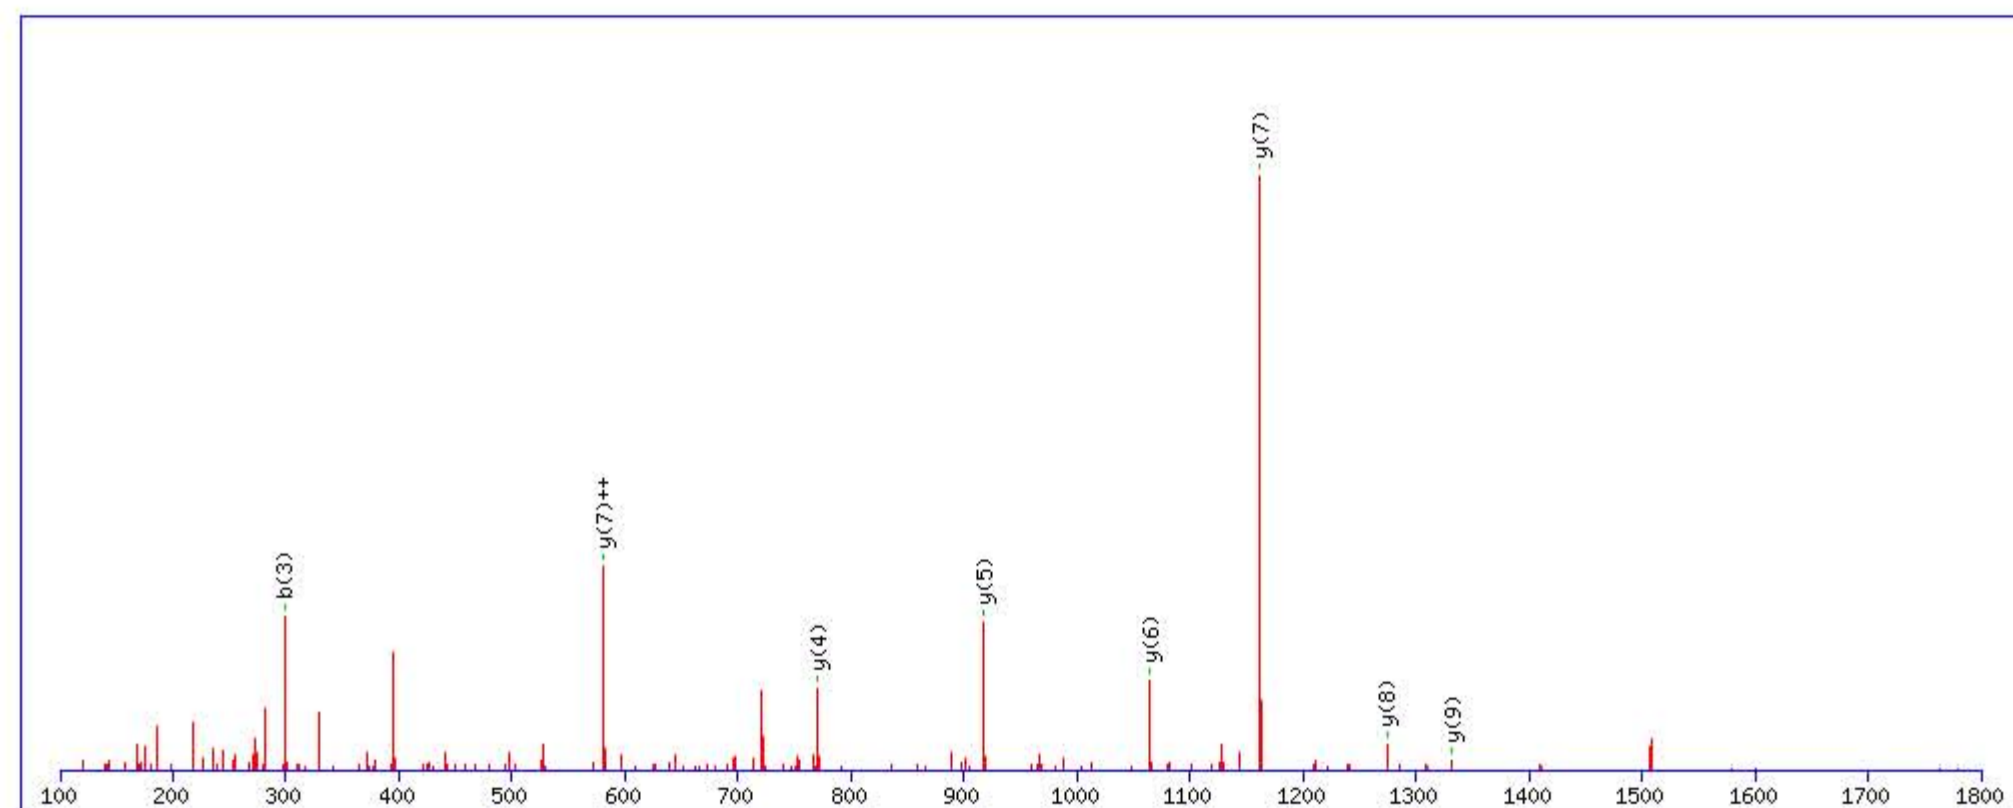

Monoisotopic mass of neutral peptide Mr(calc): 1458.780594

Fixed modifications: Carbamidomethyl (C) (apply to specified residues or termini only)

Variable modifications:

Q8 : Biotin:Thermo-21345 (Q)

Ions Score: 40 Expect: 0.00029

Matches : 8/72 fragment ions using 13 most intense peaks [\(help\)](#)

| #  | b           | b <sup>++</sup> | b <sup>+</sup> | b <sup>+++</sup> | Seq. | y           | y <sup>++</sup> | y <sup>+</sup> | y <sup>+++</sup> | #  |
|----|-------------|-----------------|----------------|------------------|------|-------------|-----------------|----------------|------------------|----|
| 1  | 129.065854  | 65.036565       | 112.039305     | 56.523291        | Q    |             |                 |                |                  | 10 |
| 2  | 186.087318  | 93.547297       | 169.060769     | 85.034023        | G    | 1331.729276 | 666.368276      | 1314.702727    | 657.855002       | 9  |
| 3  | 299.171382  | 150.089329      | 282.144833     | 141.576055       | I    | 1274.707812 | 637.857544      | 1257.681263    | 629.344270       | 8  |
| 4  | 396.224146  | 198.615711      | 379.197597     | 190.102436       | P    | 1161.623748 | 581.315512      | 1144.597199    | 572.802238       | 7  |
| 5  | 543.292560  | 272.149918      | 526.266011     | 263.636643       | F    | 1064.570984 | 532.789130      | 1047.544435    | 524.275856       | 6  |
| 6  | 690.360974  | 345.684125      | 673.334425     | 337.170850       | F    | 917.502570  | 459.254923      | 900.476021     | 450.741649       | 5  |
| 7  | 747.382438  | 374.194857      | 730.355889     | 365.681582       | G    | 770.434156  | 385.720716      | 753.407607     | 377.207442       | 4  |
| 8  | 1186.607764 | 593.807520      | 1169.581215    | 585.294246       | Q    | 713.412692  | 357.209984      | 696.386143     | 348.696710       | 3  |
| 9  | 1285.676178 | 643.341727      | 1268.649629    | 634.828453       | V    | 274.187366  | 137.597321      | 257.160817     | 129.084047       | 2  |
| 10 |             |                 |                |                  | R    | 175.118952  | 88.063114       | 158.092403     | 79.549839        | 1  |

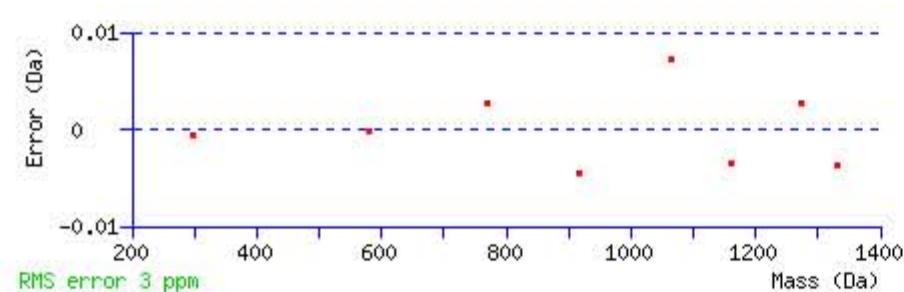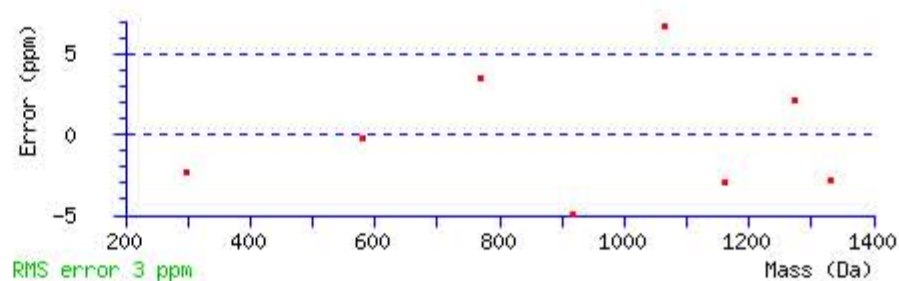

NCBI BLAST search of **QGIPFFGQVR**

(Parameters: blastp, nr protein database, expect=20000, no filter, PAM30)

Other BLAST [web gateways](#)

All matches to this query

| Score | Mr(calc):   | Delta     | Sequence                       |
|-------|-------------|-----------|--------------------------------|
| 39.9  | 1458.780594 | -0.002166 | <a href="#">QGIPFFGQVR</a>     |
| 2.0   | 1458.786438 | -0.008010 | <a href="#">QVAASTAQLLVACK</a> |
| 0.8   | 1458.798340 | -0.019912 | <a href="#">KIGGIWTWVGINK</a>  |

Mascot: <http://www.matrixscience.com/>

# MASCOT Search Results

## Peptide View

MS/MS Fragmentation of **FSGQLNSHGCFYQQVK**

Found in **A2MG\_HUMAN**, Alpha-2-macroglobulin OS=Homo sapiens GN=A2M PE=1 SV=3

Match to Query 26481: 2210.036202 from(737.686010,3+) rtinseconds(1868) index(18091)

Title: Locus:1.1.1.3216.13 File:"2013-07-02 CLN FXIII 180 min 3rd F 2.wiff"

Data file C:\Program Files (x86)\Matrix Science\Mascot Daemon\mgf9 FXIII 180 min 3rd\mascot\_daemon\_merge.mgf

Click mouse within plot area to zoom in by factor of two about that point

Or, Plot from  to  Da

Label all possible matches  Label matches used for scoring

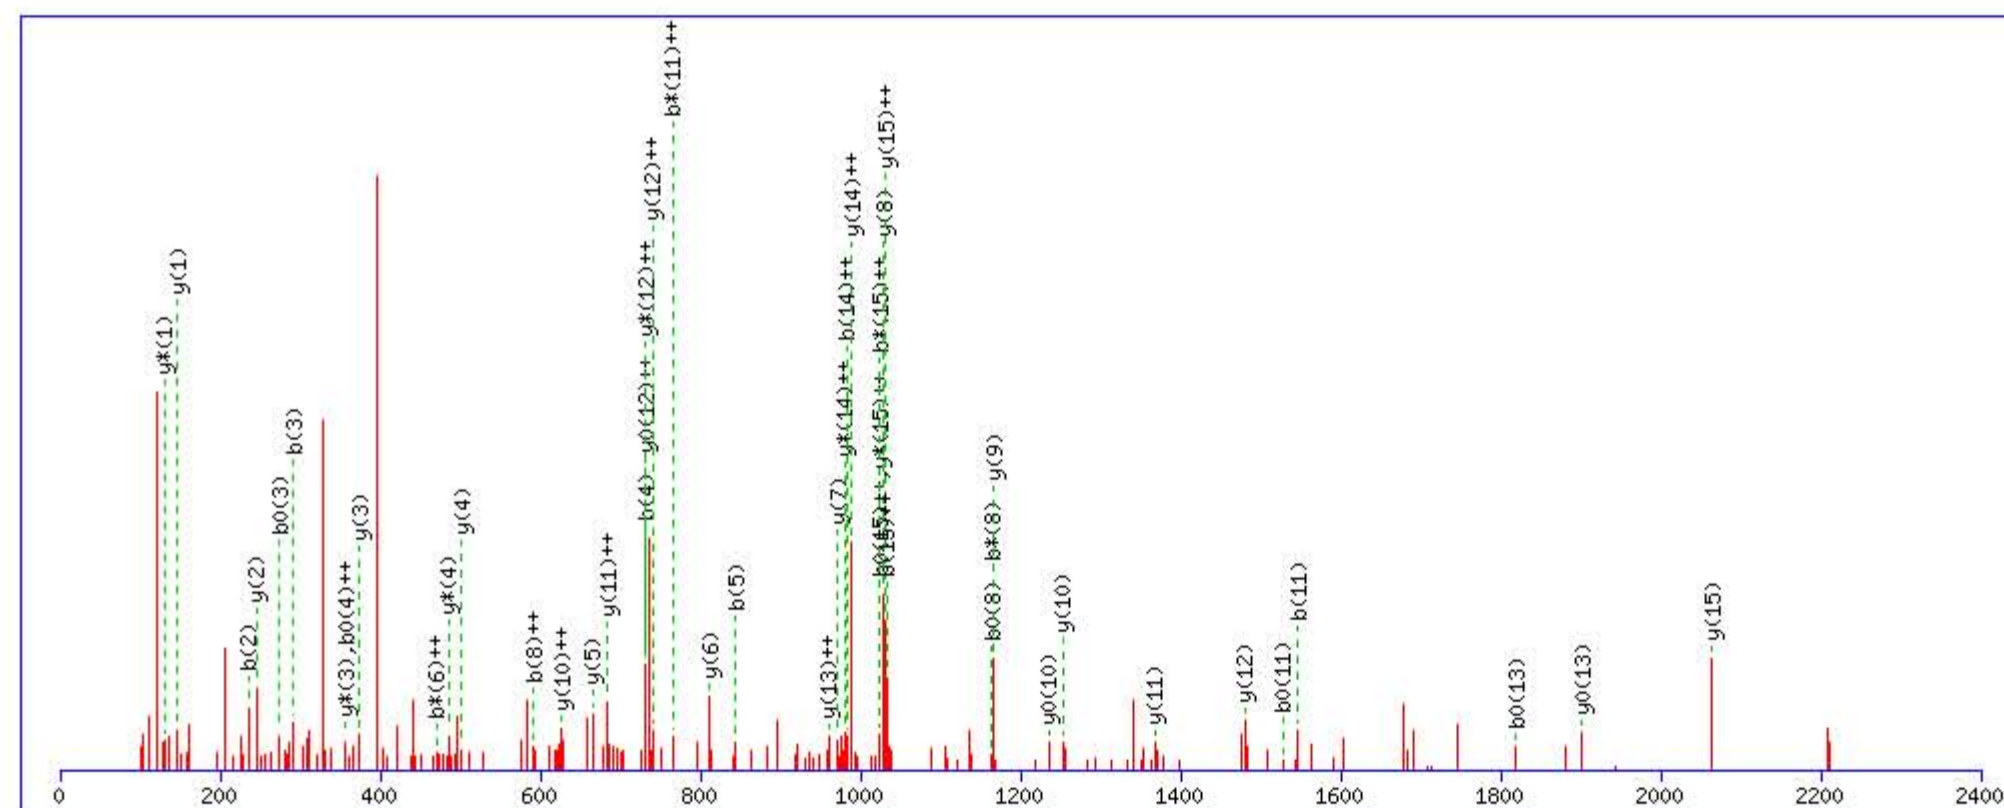

Monoisotopic mass of neutral peptide Mr(calc): 2210.040131

Fixed modifications: Carbamidomethyl (C) (apply to specified residues or termini only)

Variable modifications:

Q4 : Biotin:Thermo-21345 (Q)

Ions Score: 51 Expect: 0.00014

Matches : 46/154 fragment ions using 115 most intense peaks [\(help\)](#)

| #  | b                  | b <sup>++</sup>    | b <sup>*</sup>     | b <sup>*++</sup>   | b <sup>0</sup>     | b <sup>0++</sup>   | Seq. | y                  | y <sup>++</sup>    | y <sup>*</sup>    | y <sup>*++</sup>   | y <sup>0</sup>     | y <sup>0++</sup>  | #  |
|----|--------------------|--------------------|--------------------|--------------------|--------------------|--------------------|------|--------------------|--------------------|-------------------|--------------------|--------------------|-------------------|----|
| 1  | 148.075690         | 74.541483          |                    |                    |                    |                    | F    |                    |                    |                   |                    |                    |                   | 16 |
| 2  | <b>235.107718</b>  | 118.057497         |                    |                    | 217.097153         | 109.052214         | S    | <b>2063.978979</b> | <b>1032.493127</b> | 2046.952430       | <b>1023.979853</b> | 2045.968414        | 1023.487845       | 15 |
| 3  | <b>292.129182</b>  | 146.568229         |                    |                    | <b>274.118617</b>  | 137.562946         | G    | 1976.946951        | <b>988.977114</b>  | 1959.920402       | <b>980.463839</b>  | 1958.936386        | 979.971831        | 14 |
| 4  | <b>731.354508</b>  | 366.180892         | 714.327959         | 357.667618         | 713.343943         | <b>357.175610</b>  | Q    | 1919.925487        | <b>960.466382</b>  | 1902.898938       | 951.953107         | <b>1901.914922</b> | 951.461099        | 13 |
| 5  | <b>844.438572</b>  | 422.722924         | 827.412023         | 414.209650         | 826.428007         | 413.717642         | L    | <b>1480.700161</b> | <b>740.853719</b>  | 1463.673612       | <b>732.340444</b>  | 1462.689596        | <b>731.848436</b> | 12 |
| 6  | 958.481499         | 479.744388         | 941.454950         | <b>471.231113</b>  | 940.470934         | 470.739105         | N    | <b>1367.616097</b> | <b>684.311687</b>  | 1350.589548       | 675.798412         | 1349.605532        | 675.306404        | 11 |
| 7  | 1045.513527        | 523.260402         | 1028.486978        | 514.747127         | 1027.502962        | 514.255119         | S    | <b>1253.573170</b> | <b>627.290223</b>  | 1236.546621       | 618.776949         | <b>1235.562605</b> | 618.284941        | 10 |
| 8  | 1182.572439        | <b>591.789858</b>  | <b>1165.545890</b> | 583.276583         | <b>1164.561874</b> | 582.784575         | H    | <b>1166.541142</b> | 583.774209         | 1149.514593       | 575.260935         |                    |                   | 9  |
| 9  | 1239.593903        | 620.300590         | 1222.567354        | 611.787315         | 1221.583338        | 611.295307         | G    | <b>1029.482230</b> | 515.244753         | 1012.455681       | 506.731479         |                    |                   | 8  |
| 10 | 1399.624552        | 700.315914         | 1382.598003        | 691.802640         | 1381.613987        | 691.310632         | C    | <b>972.460766</b>  | 486.734021         | 955.434217        | 478.220747         |                    |                   | 7  |
| 11 | <b>1546.692966</b> | 773.850121         | 1529.666417        | <b>765.336847</b>  | <b>1528.682401</b> | 764.844839         | F    | <b>812.430117</b>  | 406.718697         | 795.403568        | 398.205422         |                    |                   | 6  |
| 12 | 1709.756295        | 855.381786         | 1692.729746        | 846.868511         | 1691.745730        | 846.376503         | Y    | <b>665.361703</b>  | 333.184490         | 648.335154        | 324.671215         |                    |                   | 5  |
| 13 | 1837.814873        | 919.411075         | 1820.788324        | 910.897800         | <b>1819.804308</b> | 910.405792         | Q    | <b>502.298374</b>  | 251.652825         | <b>485.271825</b> | 243.139550         |                    |                   | 4  |
| 14 | 1965.873451        | <b>983.440364</b>  | 1948.846902        | 974.927089         | 1947.862886        | 974.435081         | Q    | <b>374.239796</b>  | 187.623536         | <b>357.213247</b> | 179.110261         |                    |                   | 3  |
| 15 | 2064.941865        | <b>1032.974570</b> | 2047.915316        | <b>1024.461296</b> | 2046.931300        | <b>1023.969288</b> | V    | <b>246.181218</b>  | 123.594247         | 229.154669        | 115.080972         |                    |                   | 2  |
| 16 |                    |                    |                    |                    |                    |                    | K    | <b>147.112804</b>  | 74.060040          | <b>130.086255</b> | 65.546765          |                    |                   | 1  |

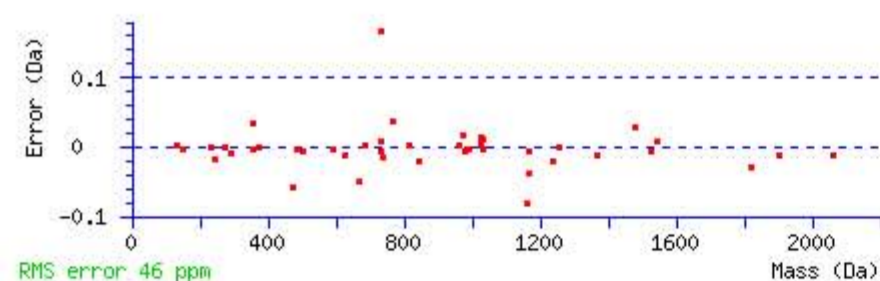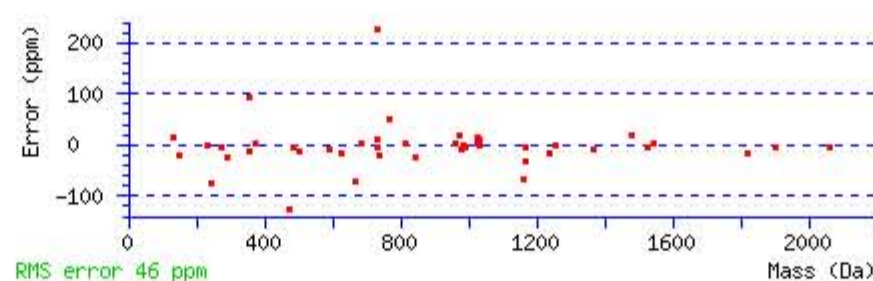

NCBI BLAST search of **FSGQLNSHGCFYQQVK**

(Parameters: blastp, nr protein database, expect=20000, no filter, PAM30)

Other BLAST [web gateways](#)

All matches to this query

| Score | Mr(calc):   | Delta     | Sequence                         |
|-------|-------------|-----------|----------------------------------|
| 50.8  | 2210.040131 | -0.003929 | <a href="#">FSGQLNSHGCFYQQVK</a> |
| 15.1  | 2210.040131 | -0.003929 | <a href="#">FSGQLNSHGCFYQQVK</a> |
| 12.7  | 2210.040131 | -0.003929 | <a href="#">FSGQLNSHGCFYQQVK</a> |



# MASCOT Search Results

## Peptide View

MS/MS Fragmentation of **AIGYLNTGYQR**

Found in **A2MG\_HUMAN**, Alpha-2-macroglobulin OS=Homo sapiens GN=A2M PE=1 SV=3

Match to Query 29064: 1565.797168 from(783.905860,2+) rtinseconds(2018) index(19167)

Title: Locus:1.1.1.3268.7 File:"2013-07-02 CLN FXIII 180 min 3rd F 2.wiff"

Data file C:\Program Files (x86)\Matrix Science\Mascot Daemon\mgf\9 FXIII 180 min 3rd\mascot\_daemon\_merge.mgf

Click mouse within plot area to zoom in by factor of two about that point

Or, Plot from  to  Da

Label all possible matches  Label matches used for scoring

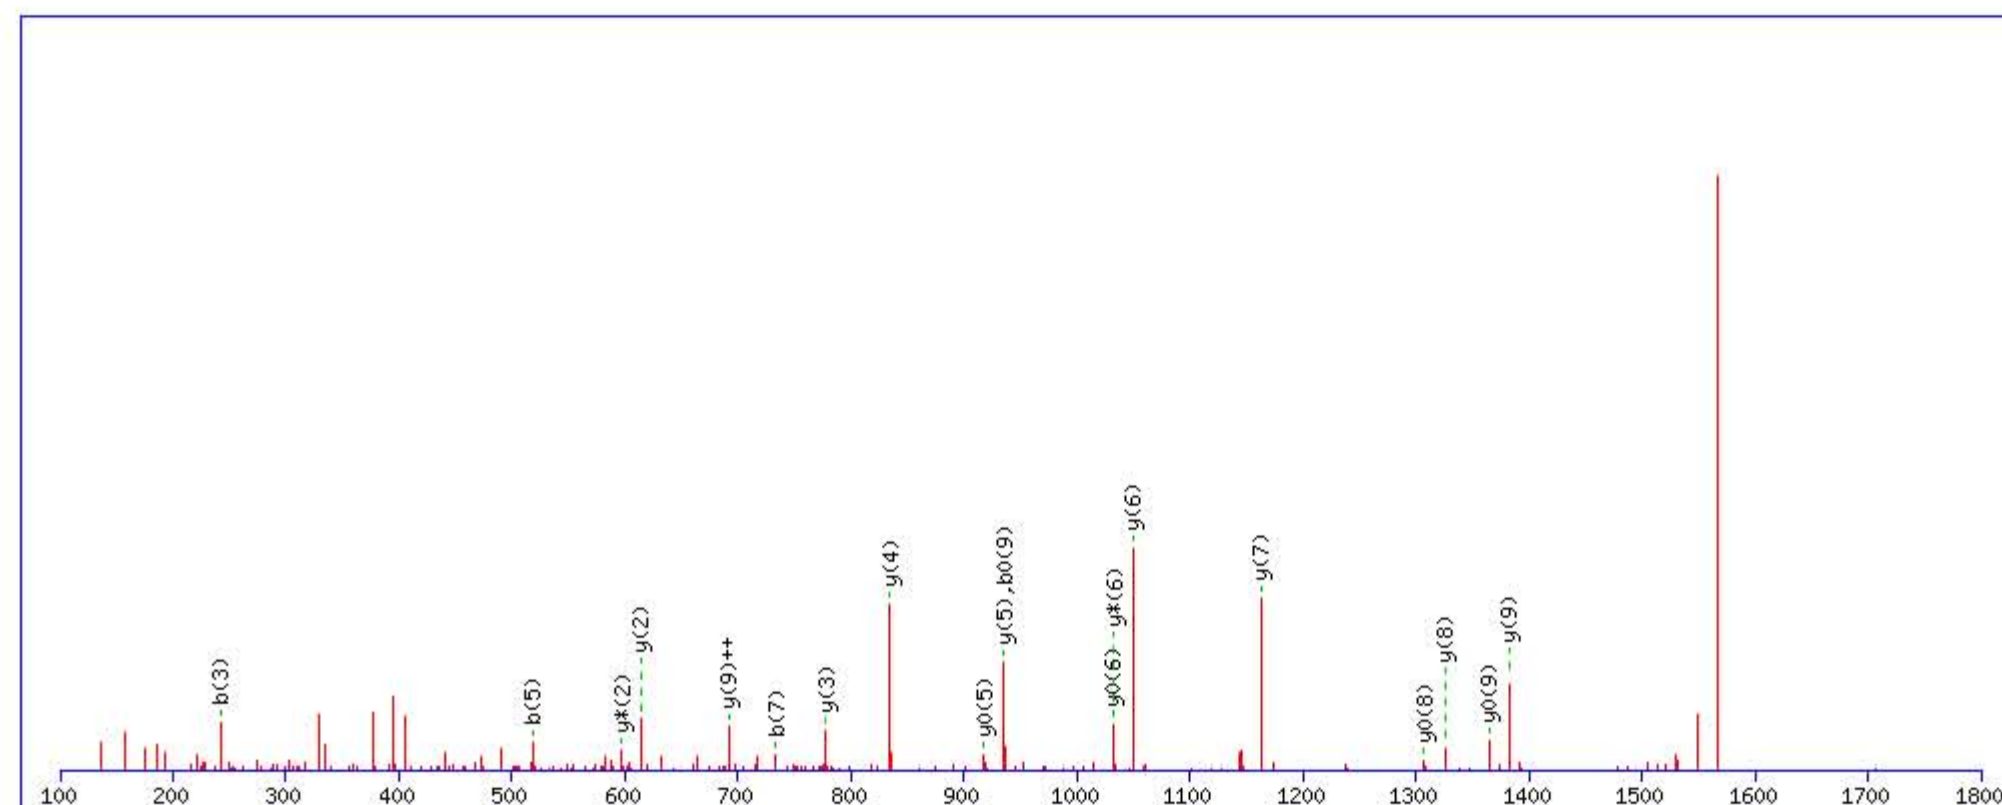

Monoisotopic mass of neutral peptide Mr(calc): 1565.802414

Fixed modifications: Carbamidomethyl (C) (apply to specified residues or termini only)

Variable modifications:

Q10 : Biotin:Thermo-21345 (Q)

Ions Score: 56 Expect: 8.8e-006

Matches : 19/90 fragment ions using 29 most intense peaks [\(help\)](#)

| #  | b                 | b <sup>++</sup> | b <sup>*</sup> | b <sup>*++</sup> | b <sup>0</sup>    | b <sup>0++</sup> | Seq. | y                  | y <sup>++</sup>   | y <sup>*</sup>     | y <sup>*++</sup> | y <sup>0</sup>     | y <sup>0++</sup> | #  |
|----|-------------------|-----------------|----------------|------------------|-------------------|------------------|------|--------------------|-------------------|--------------------|------------------|--------------------|------------------|----|
| 1  | 72.044390         | 36.525833       |                |                  |                   |                  | A    |                    |                   |                    |                  |                    |                  | 11 |
| 2  | 185.128454        | 93.067865       |                |                  |                   |                  | I    | 1495.772598        | 748.389937        | 1478.746049        | 739.876663       | 1477.762033        | 739.384655       | 10 |
| 3  | <b>242.149918</b> | 121.578597      |                |                  |                   |                  | G    | <b>1382.688534</b> | <b>691.847905</b> | 1365.661985        | 683.334631       | <b>1364.677969</b> | 682.842623       | 9  |
| 4  | 405.213247        | 203.110261      |                |                  |                   |                  | Y    | <b>1325.667070</b> | 663.337173        | 1308.640521        | 654.823899       | <b>1307.656505</b> | 654.331890       | 8  |
| 5  | <b>518.297311</b> | 259.652294      |                |                  |                   |                  | L    | <b>1162.603741</b> | 581.805509        | 1145.577192        | 573.292234       | 1144.593176        | 572.800226       | 7  |
| 6  | 632.340238        | 316.673757      | 615.313689     | 308.160483       |                   |                  | N    | <b>1049.519677</b> | 525.263477        | <b>1032.493128</b> | 516.750202       | <b>1031.509112</b> | 516.258194       | 6  |
| 7  | <b>733.387917</b> | 367.197597      | 716.361368     | 358.684322       | 715.377352        | 358.192314       | T    | <b>935.476750</b>  | 468.242013        | 918.450201         | 459.728739       | <b>917.466185</b>  | 459.236731       | 5  |
| 8  | 790.409381        | 395.708329      | 773.382832     | 387.195054       | 772.398816        | 386.703046       | G    | <b>834.429071</b>  | 417.718174        | 817.402522         | 409.204899       |                    |                  | 4  |
| 9  | 953.472710        | 477.239993      | 936.446161     | 468.726719       | <b>935.462145</b> | 468.234711       | Y    | <b>777.407607</b>  | 389.207442        | 760.381058         | 380.694167       |                    |                  | 3  |
| 10 | 1392.698036       | 696.852656      | 1375.671487    | 688.339382       | 1374.687471       | 687.847374       | Q    | <b>614.344278</b>  | 307.675777        | <b>597.317729</b>  | 299.162503       |                    |                  | 2  |
| 11 |                   |                 |                |                  |                   |                  | R    | 175.118952         | 88.063114         | 158.092403         | 79.549839        |                    |                  | 1  |

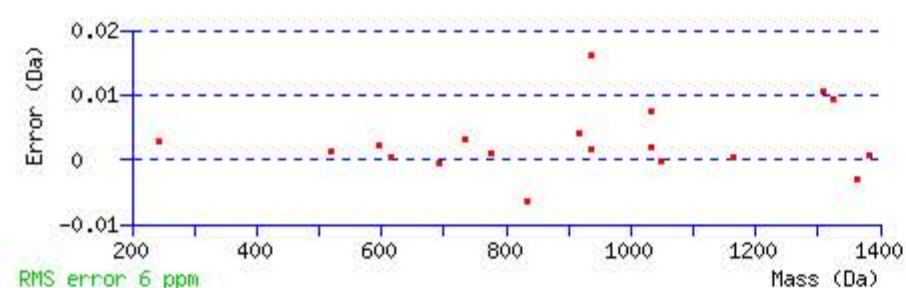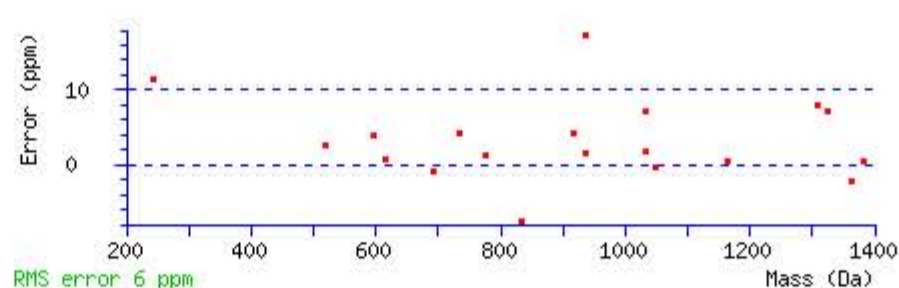

NCBI BLAST search of **AIGYLNTGYQR**

(Parameters: blastp, nr protein database, expect=20000, no filter, PAM30)

Other BLAST [web gateways](#)

All matches to this query

| Score | Mr(calc):   | Delta     | Sequence                       |
|-------|-------------|-----------|--------------------------------|
| 56.1  | 1565.802414 | -0.005246 | <a href="#">AIGYLNTGYQR</a>    |
| 2.2   | 1565.806259 | -0.009091 | <a href="#">QIHKLQDWAGSRQ</a>  |
| 2.0   | 1565.795013 | 0.002155  | <a href="#">SSPASSPELPWRPR</a> |
| 1.7   | 1565.781296 | 0.015872  | <a href="#">AGLFSWQYQR</a>     |

Mascot: <http://www.matrixscience.com/>

# MASCOT Search Results

## Peptide View

MS/MS Fragmentation of **VTAAPQSVCALR**

Found in **A2MG\_HUMAN**, Alpha-2-macroglobulin OS=Homo sapiens GN=A2M PE=1 SV=3

Match to Query 29726: 1582.827048 from(792.420800,2+) rtinseconds(1836) index(17930)

Title: Locus:1.1.1.3205.7 File:"2013-07-02 CLN FXIII 180 min 3rd F 2.wiff"

Data file C:\Program Files (x86)\Matrix Science\Mascot Daemon\mgf\9 FXIII 180 min 3rd\mascot\_daemon\_merge.mgf

Click mouse within plot area to zoom in by factor of two about that point

Or, Plot from  to  Da

Label all possible matches  Label matches used for scoring

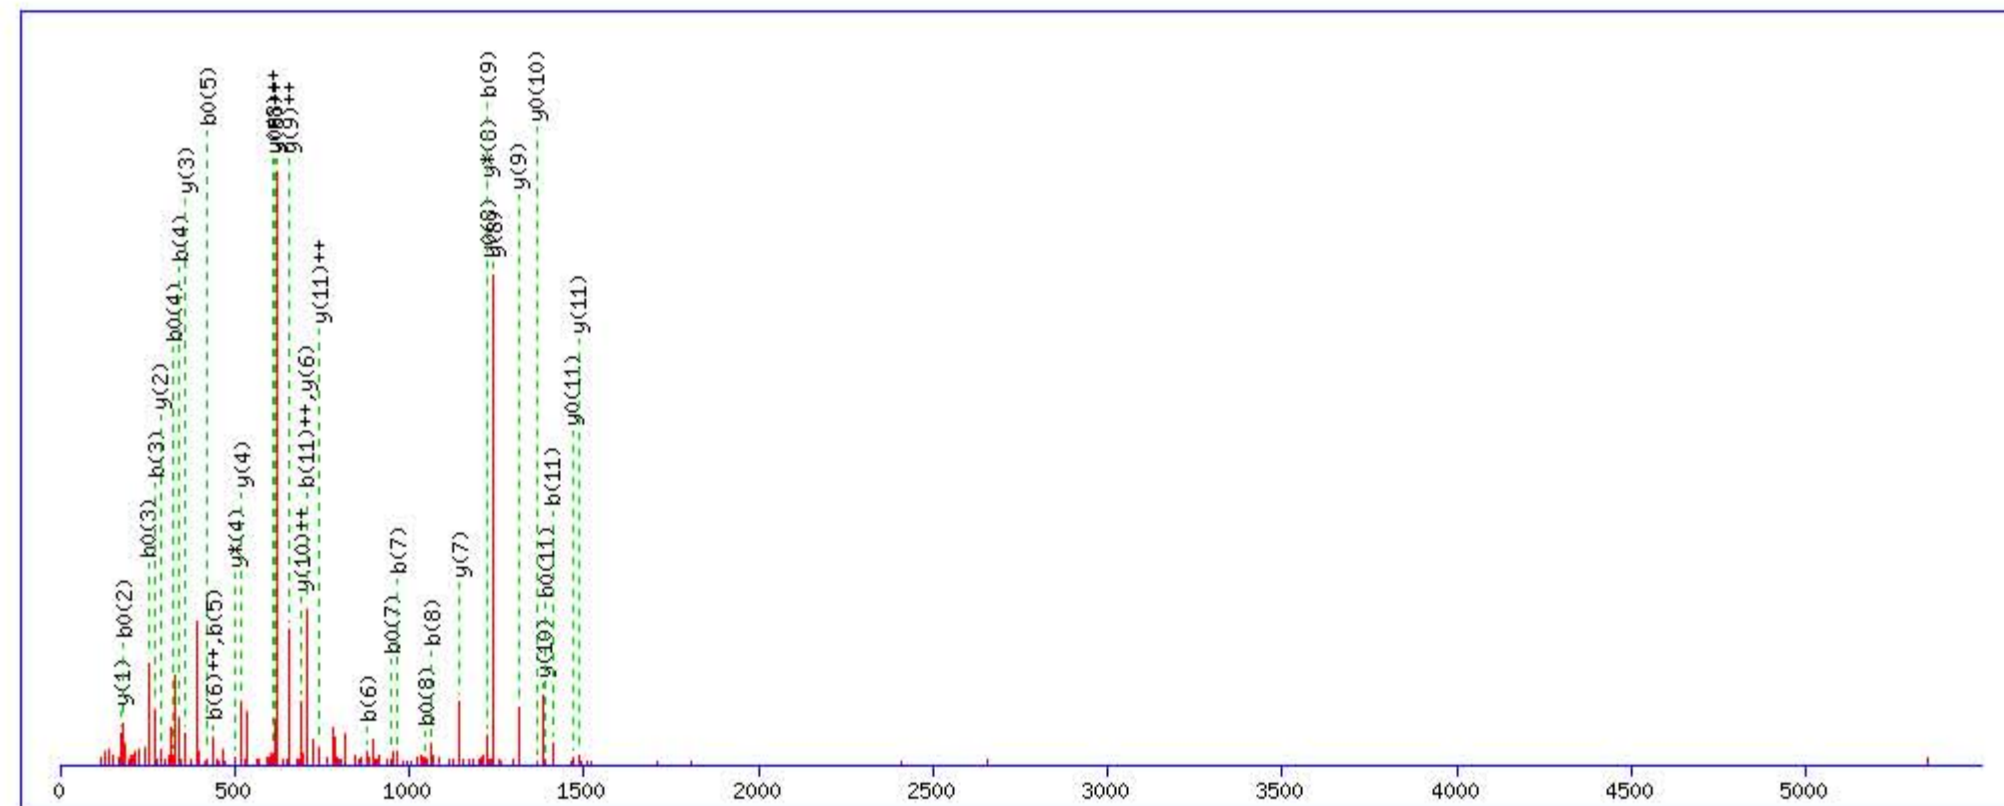

Monoisotopic mass of neutral peptide Mr(calc): 1582.832352

Fixed modifications: Carbamidomethyl (C) (apply to specified residues or termini only)

Variable modifications:

Q6 : Biotin:Thermo-21345 (Q)

Ions Score: 56 Expect: 1.9e-005

Matches : 38/110 fragment ions using 84 most intense peaks [\(help\)](#)

| #  | b           | b <sup>++</sup> | b <sup>+</sup> | b <sup>+++</sup> | b <sup>0</sup> | b <sup>0++</sup> | Seq. | y           | y <sup>++</sup> | y <sup>+</sup> | y <sup>+++</sup> | y <sup>0</sup> | y <sup>0++</sup> | #  |
|----|-------------|-----------------|----------------|------------------|----------------|------------------|------|-------------|-----------------|----------------|------------------|----------------|------------------|----|
| 1  | 100.075690  | 50.541483       |                |                  |                |                  | V    |             |                 |                |                  |                |                  | 12 |
| 2  | 201.123369  | 101.065322      |                |                  | 183.112804     | 92.060040        | T    | 1484.771218 | 742.889247      | 1467.744669    | 734.375972       | 1466.760653    | 733.883964       | 11 |
| 3  | 272.160483  | 136.583879      |                |                  | 254.149918     | 127.578597       | A    | 1383.723539 | 692.365407      | 1366.696990    | 683.852133       | 1365.712974    | 683.360125       | 10 |
| 4  | 343.197597  | 172.102437      |                |                  | 325.187032     | 163.097154       | A    | 1312.686425 | 656.846850      | 1295.659876    | 648.333576       | 1294.675860    | 647.841568       | 9  |
| 5  | 440.250361  | 220.628819      |                |                  | 422.239796     | 211.623536       | P    | 1241.649311 | 621.328293      | 1224.622762    | 612.815019       | 1223.638746    | 612.323011       | 8  |
| 6  | 879.475687  | 440.241482      | 862.449138     | 431.728207       | 861.465122     | 431.236199       | Q    | 1144.596547 | 572.801911      | 1127.569998    | 564.288637       | 1126.585982    | 563.796629       | 7  |
| 7  | 966.507715  | 483.757496      | 949.481166     | 475.244221       | 948.497150     | 474.752213       | S    | 705.371221  | 353.189248      | 688.344672     | 344.675974       | 687.360656     | 344.183966       | 6  |
| 8  | 1065.576129 | 533.291703      | 1048.549580    | 524.778428       | 1047.565564    | 524.286420       | V    | 618.339193  | 309.673234      | 601.312644     | 301.159960       |                |                  | 5  |
| 9  | 1225.606778 | 613.307027      | 1208.580229    | 604.793753       | 1207.596213    | 604.301745       | C    | 519.270779  | 260.139028      | 502.244230     | 251.625753       |                |                  | 4  |
| 10 | 1296.643892 | 648.825584      | 1279.617343    | 640.312310       | 1278.633327    | 639.820302       | A    | 359.240130  | 180.123703      | 342.213581     | 171.610428       |                |                  | 3  |
| 11 | 1409.727956 | 705.367616      | 1392.701407    | 696.854342       | 1391.717391    | 696.362333       | L    | 288.203016  | 144.605146      | 271.176467     | 136.091871       |                |                  | 2  |
| 12 |             |                 |                |                  |                |                  | R    | 175.118952  | 88.063114       | 158.092403     | 79.549839        |                |                  | 1  |

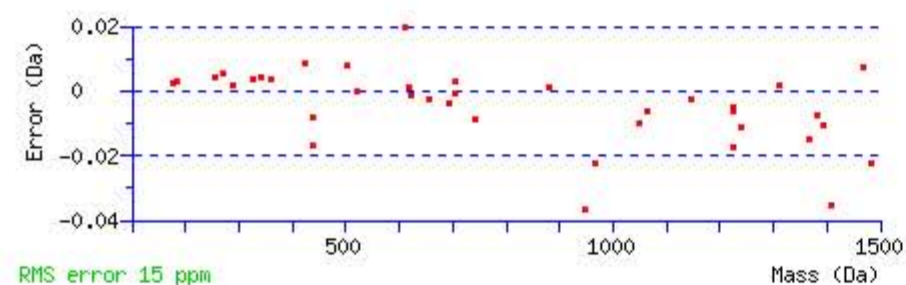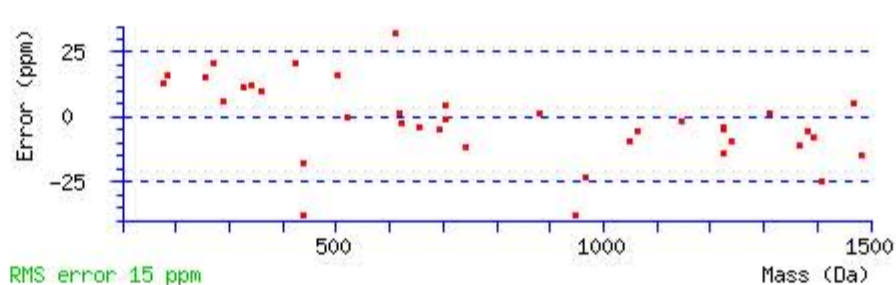

NCBI BLAST search of **VTAAPQSVCALR**

(Parameters: blastp, nr protein database, expect=20000, no filter, PAM30)

Other BLAST [web gateways](#)

All matches to this query

| Score | Mr(calc):   | Delta     | Sequence                        |
|-------|-------------|-----------|---------------------------------|
| 56.4  | 1582.832352 | -0.005304 | <a href="#">VTAAPQSVCALR</a>    |
| 5.8   | 1582.821564 | 0.005484  | <a href="#">LSKAVATWHANTER</a>  |
| 3.0   | 1582.821579 | 0.005469  | <a href="#">IGGHGPTLKAYQEGR</a> |
| 1.1   | 1582.817535 | 0.009513  | <a href="#">KTLSEETRQHQR</a>    |

Mascot: <http://www.matrixscience.com/>

# Mascot Search Results

## Peptide View

MS/MS Fragmentation of **FSGQLNSHGCFYQQVK**

Found in **A2MG\_HUMAN**, Alpha-2-macroglobulin OS=Homo sapiens GN=A2M PE=1 SV=3

Match to Query 43341: 2210.032782 from(737.684870,3+) rtinseconds(1894) index(18269)

Title: Locus:1.1.1.3225.21 File:"2013-07-02 CLN FXIII 180 min 3rd F 2.wiff"

Data file C:\Program Files (x86)\Matrix Science\Mascot Daemon\mgf9 FXIII 180 min 3rd\mascot\_daemon\_merge.mgf

Click mouse within plot area to zoom in by factor of two about that point

Or, Plot from  to  Da

Label all possible matches  Label matches used for scoring

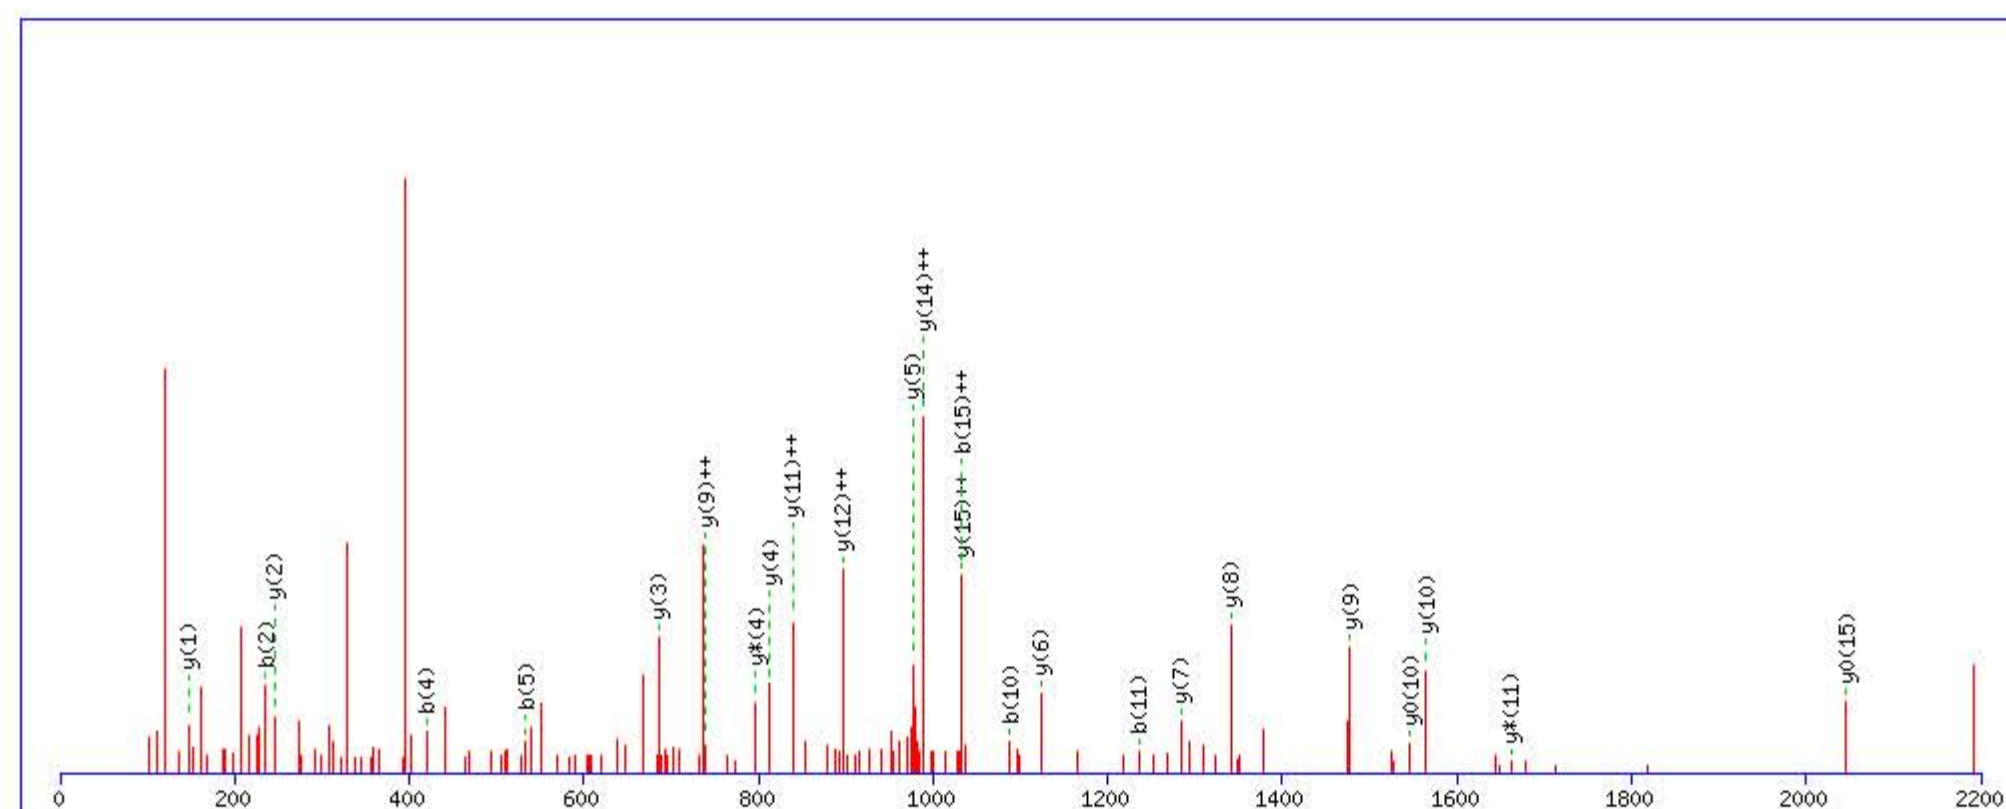

Monoisotopic mass of neutral peptide Mr(calc): 2210.040131

Fixed modifications: Carbamidomethyl (C) (apply to specified residues or termini only)

Variable modifications:

Q14 : Biotin:Thermo-21345 (Q)

Ions Score: 51 Expect: 4.8e-005

Matches : 25/154 fragment ions using 51 most intense peaks [\(help\)](#)

| #  | b                  | b <sup>++</sup>    | b <sup>*</sup> | b <sup>*++</sup> | b <sup>0</sup> | b <sup>0++</sup> | Seq. | y                  | y <sup>++</sup>    | y <sup>*</sup>     | y <sup>*++</sup> | y <sup>0</sup>     | y <sup>0++</sup> | #  |
|----|--------------------|--------------------|----------------|------------------|----------------|------------------|------|--------------------|--------------------|--------------------|------------------|--------------------|------------------|----|
| 1  | 148.075690         | 74.541483          |                |                  |                |                  | F    |                    |                    |                    |                  |                    |                  | 16 |
| 2  | <b>235.107718</b>  | 118.057497         |                |                  | 217.097153     | 109.052214       | S    | 2063.978979        | <b>1032.493127</b> | 2046.952430        | 1023.979853      | <b>2045.968414</b> | 1023.487845      | 15 |
| 3  | 292.129182         | 146.568229         |                |                  | 274.118617     | 137.562946       | G    | 1976.946951        | <b>988.977114</b>  | 1959.920402        | 980.463839       | 1958.936386        | 979.971831       | 14 |
| 4  | <b>420.187760</b>  | 210.597518         | 403.161211     | 202.084243       | 402.177195     | 201.592235       | Q    | 1919.925487        | 960.466382         | 1902.898938        | 951.953107       | 1901.914922        | 951.461099       | 13 |
| 5  | <b>533.271824</b>  | 267.139550         | 516.245275     | 258.626276       | 515.261259     | 258.134268       | L    | 1791.866909        | <b>896.437093</b>  | 1774.840360        | 887.923818       | 1773.856344        | 887.431810       | 12 |
| 6  | 647.314751         | 324.161014         | 630.288202     | 315.647739       | 629.304186     | 315.155731       | N    | 1678.782845        | <b>839.895061</b>  | <b>1661.756296</b> | 831.381786       | 1660.772280        | 830.889778       | 11 |
| 7  | 734.346779         | 367.677028         | 717.320230     | 359.163753       | 716.336214     | 358.671745       | S    | <b>1564.739918</b> | 782.873597         | 1547.713369        | 774.360323       | <b>1546.729353</b> | 773.868315       | 10 |
| 8  | 871.405691         | 436.206483         | 854.379142     | 427.693209       | 853.395126     | 427.201201       | H    | <b>1477.707890</b> | <b>739.357583</b>  | 1460.681341        | 730.844309       |                    |                  | 9  |
| 9  | 928.427155         | 464.717216         | 911.400606     | 456.203941       | 910.416590     | 455.711933       | G    | <b>1340.648978</b> | 670.828127         | 1323.622429        | 662.314853       |                    |                  | 8  |
| 10 | <b>1088.457804</b> | 544.732540         | 1071.431255    | 536.219266       | 1070.447239    | 535.727257       | C    | <b>1283.627514</b> | 642.317395         | 1266.600965        | 633.804121       |                    |                  | 7  |
| 11 | <b>1235.526218</b> | 618.266747         | 1218.499669    | 609.753473       | 1217.515653    | 609.261464       | F    | <b>1123.596865</b> | 562.302071         | 1106.570316        | 553.788796       |                    |                  | 6  |
| 12 | 1398.589547        | 699.798412         | 1381.562998    | 691.285137       | 1380.578982    | 690.793129       | Y    | <b>976.528451</b>  | 488.767864         | 959.501902         | 480.254589       |                    |                  | 5  |
| 13 | 1526.648125        | 763.827700         | 1509.621576    | 755.314426       | 1508.637560    | 754.822418       | Q    | <b>813.465122</b>  | 407.236199         | <b>796.438573</b>  | 398.722925       |                    |                  | 4  |
| 14 | 1965.873451        | 983.440364         | 1948.846902    | 974.927089       | 1947.862886    | 974.435081       | Q    | <b>685.406544</b>  | 343.206910         | 668.379995         | 334.693636       |                    |                  | 3  |
| 15 | 2064.941865        | <b>1032.974570</b> | 2047.915316    | 1024.461296      | 2046.931300    | 1023.969288      | V    | <b>246.181218</b>  | 123.594247         | 229.154669         | 115.080972       |                    |                  | 2  |
| 16 |                    |                    |                |                  |                |                  | K    | <b>147.112804</b>  | 74.060040          | 130.086255         | 65.546765        |                    |                  | 1  |

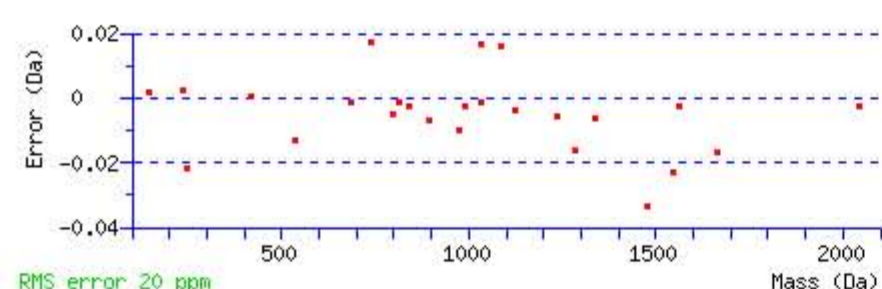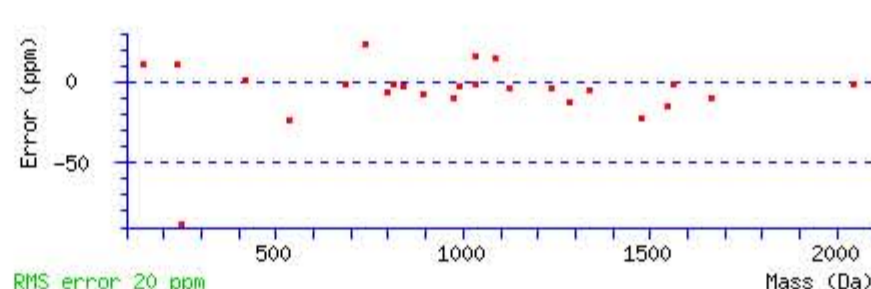

NCBI BLAST search of **FSGQLNSHGCFYQQVK**

(Parameters: blastp, nr protein database, expect=20000, no filter, PAM30)

Other BLAST [web gateways](#)

All matches to this query

| Score | Mr(calc):   | Delta     | Sequence                         |
|-------|-------------|-----------|----------------------------------|
| 50.9  | 2210.040131 | -0.007349 | <a href="#">FSGQLNSHGCFYQQVK</a> |
| 42.8  | 2210.040131 | -0.007349 | <a href="#">FSGQLNSHGCFYQQVK</a> |
| 4.7   | 2210.058075 | -0.025293 | <a href="#">FSHL SRNMTMQRTMK</a> |
| 4.6   | 2210.058075 | -0.025293 | <a href="#">FSHL SRNMTMQRTMK</a> |
| 1.6   | 2210.045486 | -0.012704 | <a href="#">MSMKEVDEQMLAIQSK</a> |

# MASCOT Search Results

## Peptide View

MS/MS Fragmentation of **LLLQVSLPELPGEYSMK**  
 Found in **A2MG\_HUMAN**, Alpha-2-macroglobulin OS=Homo sapiens GN=A2M PE=1 SV=3

Match to Query 45898: 2355.254922 from(786.092250,3+) rtinseconds(2870) index(37114)  
 Title: Locus:1.1.1.3661.12 File:"2013-07-02 CLN FXIII 180 min 3rd F 3.wiff"  
 Data file C:\Program Files (x86)\Matrix Science\Mascot Daemon\mgf9 FXIII 180 min 3rd\mascot\_daemon\_merge.mgf

Click mouse within plot area to zoom in by factor of two about that point  
 Or, Plot from  to  Da   
 Label all possible matches  Label matches used for scoring

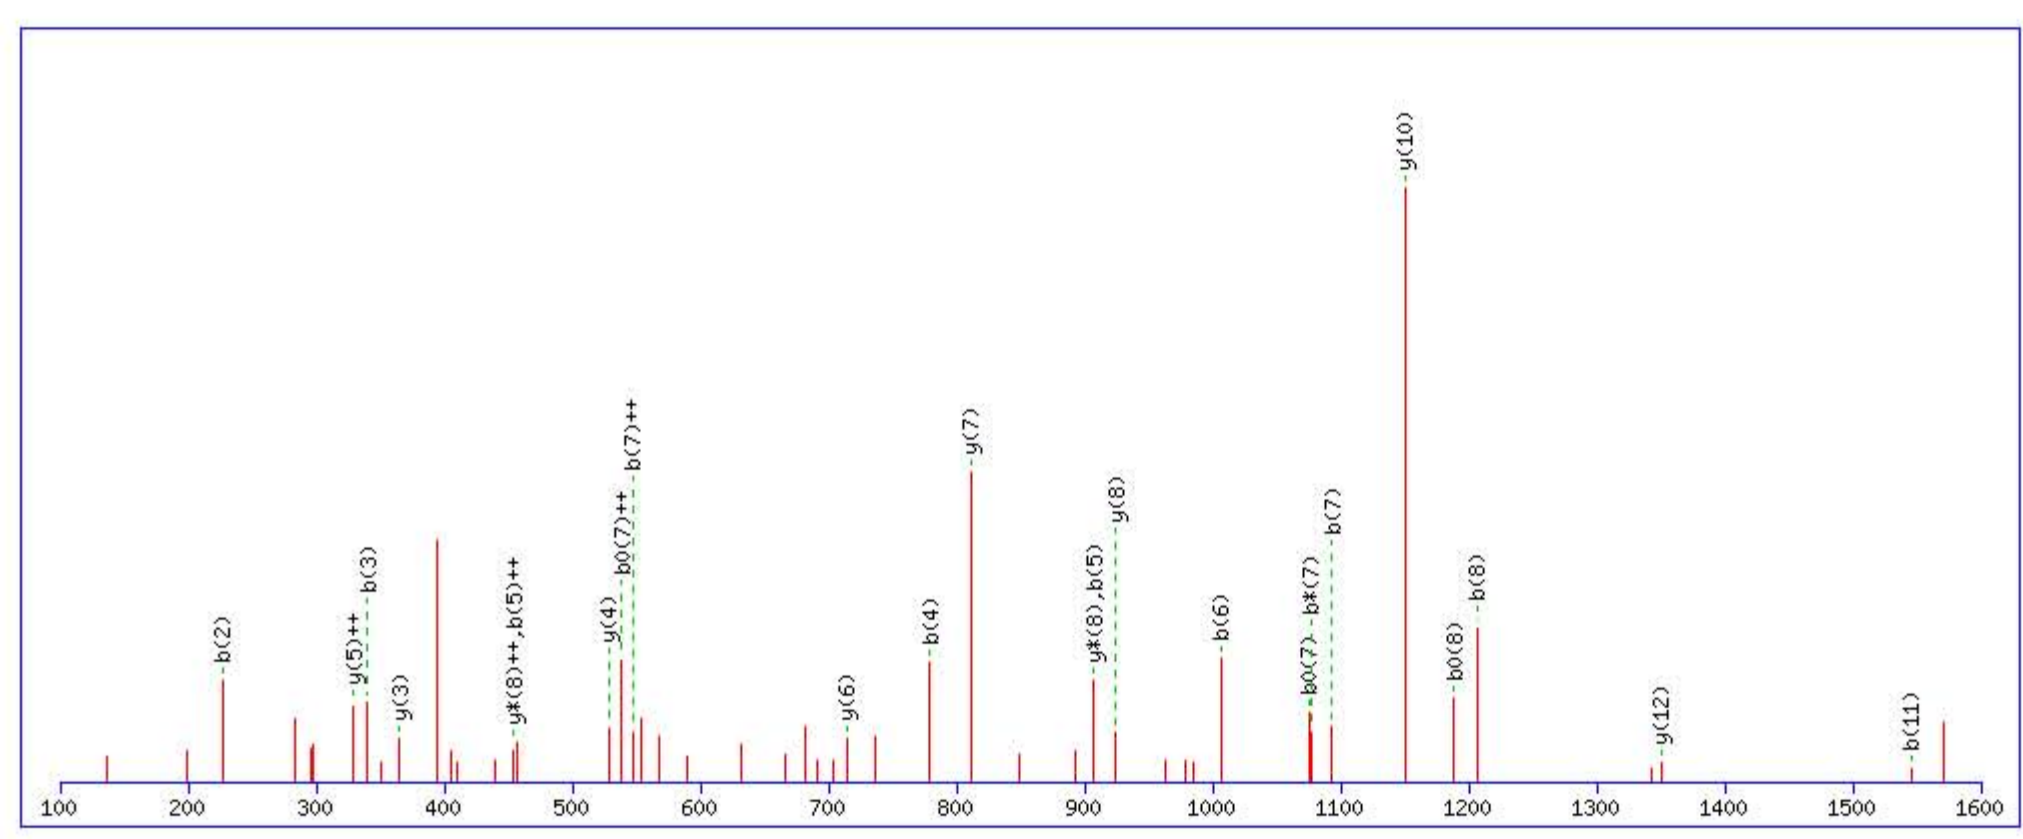

Monoisotopic mass of neutral peptide Mr(calc): 2355.258179  
 Fixed modifications: Carbamidomethyl (C) (apply to specified residues or termini only)  
 Variable modifications:  
 Q4 : Biotin:Thermo-21345 (Q)  
 Ions Score: 51 Expect: 0.00021  
 Matches : 24/182 fragment ions using 38 most intense peaks [\(help\)](#)

| #  | b                  | b <sup>++</sup>   | b <sup>*</sup>     | b <sup>*++</sup> | b <sup>0</sup>     | b <sup>0++</sup>  | Seq. | y                  | y <sup>++</sup>   | y <sup>*</sup>    | y <sup>*++</sup>  | y <sup>0</sup> | y <sup>0++</sup> | #  |
|----|--------------------|-------------------|--------------------|------------------|--------------------|-------------------|------|--------------------|-------------------|-------------------|-------------------|----------------|------------------|----|
| 1  | 114.091340         | 57.549308         |                    |                  |                    |                   | L    |                    |                   |                   |                   |                |                  | 18 |
| 2  | <b>227.175404</b>  | 114.091340        |                    |                  |                    |                   | L    | 2243.181426        | 1122.094351       | 2226.154877       | 1113.581076       | 2225.170861    | 1113.089068      | 17 |
| 3  | <b>340.259468</b>  | 170.633372        |                    |                  |                    |                   | L    | 2130.097362        | 1065.552319       | 2113.070813       | 1057.039044       | 2112.086797    | 1056.547036      | 16 |
| 4  | <b>779.484794</b>  | 390.246035        | 762.458245         | 381.732760       |                    |                   | Q    | 2017.013298        | 1009.010287       | 1999.986749       | 1000.497013       | 1999.002733    | 1000.005005      | 15 |
| 5  | <b>907.543372</b>  | <b>454.275324</b> | 890.516823         | 445.762049       |                    |                   | Q    | 1577.787972        | 789.397624        | 1560.761423       | 780.884350        | 1559.777407    | 780.392342       | 14 |
| 6  | <b>1006.611786</b> | 503.809531        | 989.585237         | 495.296256       |                    |                   | V    | 1449.729394        | 725.368335        | 1432.702845       | 716.855061        | 1431.718829    | 716.363053       | 13 |
| 7  | <b>1093.643814</b> | <b>547.325545</b> | <b>1076.617265</b> | 538.812271       | <b>1075.633249</b> | <b>538.320263</b> | S    | <b>1350.660980</b> | 675.834128        | 1333.634431       | 667.320854        | 1332.650415    | 666.828846       | 12 |
| 8  | <b>1206.727878</b> | 603.867577        | 1189.701329        | 595.354303       | <b>1188.717313</b> | 594.862294        | L    | 1263.628952        | 632.318114        | 1246.602403       | 623.804840        | 1245.618387    | 623.312832       | 11 |
| 9  | 1303.780642        | 652.393959        | 1286.754093        | 643.880685       | 1285.770077        | 643.388676        | P    | <b>1150.544888</b> | 575.776082        | 1133.518339       | 567.262808        | 1132.534323    | 566.770800       | 10 |
| 10 | 1432.823235        | 716.915256        | 1415.796686        | 708.401981       | 1414.812670        | 707.909973        | E    | 1053.492124        | 527.249700        | 1036.465575       | 518.736426        | 1035.481559    | 518.244418       | 9  |
| 11 | <b>1545.907299</b> | 773.457288        | 1528.880750        | 764.944013       | 1527.896734        | 764.452005        | L    | <b>924.449531</b>  | 462.728404        | <b>907.422982</b> | <b>454.215129</b> | 906.438966     | 453.723121       | 8  |
| 12 | 1642.960063        | 821.983670        | 1625.933514        | 813.470395       | 1624.949498        | 812.978387        | P    | <b>811.365467</b>  | 406.186372        | 794.338918        | 397.673097        | 793.354902     | 397.181089       | 7  |
| 13 | 1699.981527        | 850.494401        | 1682.954978        | 841.981127       | 1681.970962        | 841.489119        | G    | <b>714.312703</b>  | 357.659990        | 697.286154        | 349.146715        | 696.302138     | 348.654707       | 6  |
| 14 | 1829.024120        | 915.015698        | 1811.997571        | 906.502423       | 1811.013555        | 906.010415        | E    | 657.291239         | <b>329.149258</b> | 640.264690        | 320.635983        | 639.280674     | 320.143975       | 5  |
| 15 | 1992.087449        | 996.547362        | 1975.060900        | 988.034088       | 1974.076884        | 987.542080        | Y    | <b>528.248646</b>  | 264.627961        | 511.222097        | 256.114687        | 510.238081     | 255.622679       | 4  |
| 16 | 2079.119477        | 1040.063376       | 2062.092928        | 1031.550102      | 2061.108912        | 1031.058094       | S    | <b>365.185317</b>  | 183.096297        | 348.158768        | 174.583022        | 347.174752     | 174.091014       | 3  |
| 17 | 2210.159962        | 1105.583619       | 2193.133413        | 1097.070344      | 2192.149397        | 1096.578336       | M    | 278.153289         | 139.580282        | 261.126740        | 131.067008        |                |                  | 2  |
| 18 |                    |                   |                    |                  |                    |                   | K    | 147.112804         | 74.060040         | 130.086255        | 65.546765         |                |                  | 1  |

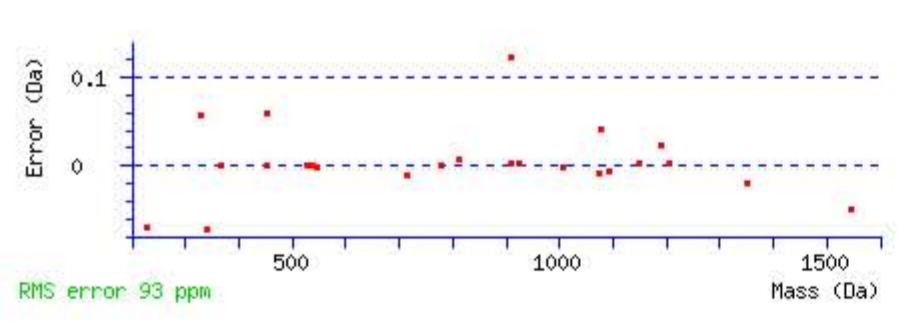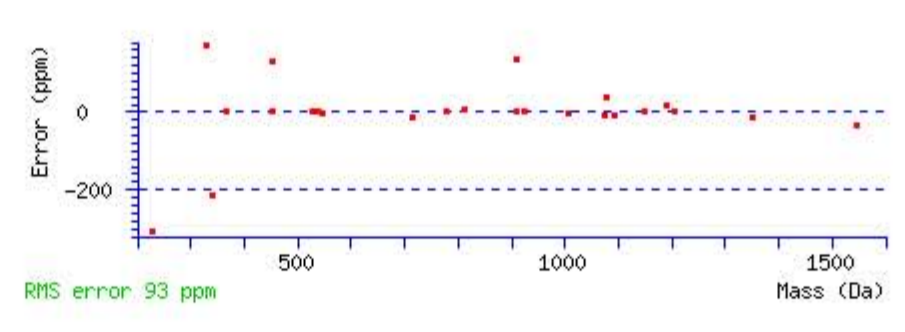

NCBI BLAST search of **LLLQVSLPELPGEYSMK**  
 (Parameters: blastp, nr protein database, expect=20000, no filter, PAM30)  
 Other BLAST [web gateways](#)

### All matches to this query

| Score | Mr(calc):   | Delta     | Sequence                          |
|-------|-------------|-----------|-----------------------------------|
| 50.9  | 2355.258179 | -0.003257 | <a href="#">LLLQVSLPELPGEYSMK</a> |
| 43.0  | 2355.258179 | -0.003257 | <a href="#">LLLQVSLPELPGEYSMK</a> |

# MASCOT Search Results

## Peptide View

MS/MS Fragmentation of **LLLQQVSLPELPGEYSMK**

Found in **A2MG\_HUMAN**, Alpha-2-macroglobulin OS=Homo sapiens GN=A2M PE=1 SV=3

Match to Query 45904: 2355.265242 from(786.095690,3+) rtinseconds(2845) index(23998)

Title: Locus:1.1.1.3554.23 File:"2013-07-02 CLN FXIII 180 min 3rd F 2.wiff"

Data file C:\Program Files (x86)\Matrix Science\Mascot Daemon\mgf9 FXIII 180 min 3rd\mascot\_daemon\_merge.mgf

Click mouse within plot area to zoom in by factor of two about that point

Or, Plot from  to  Da

Label all possible matches  Label matches used for scoring

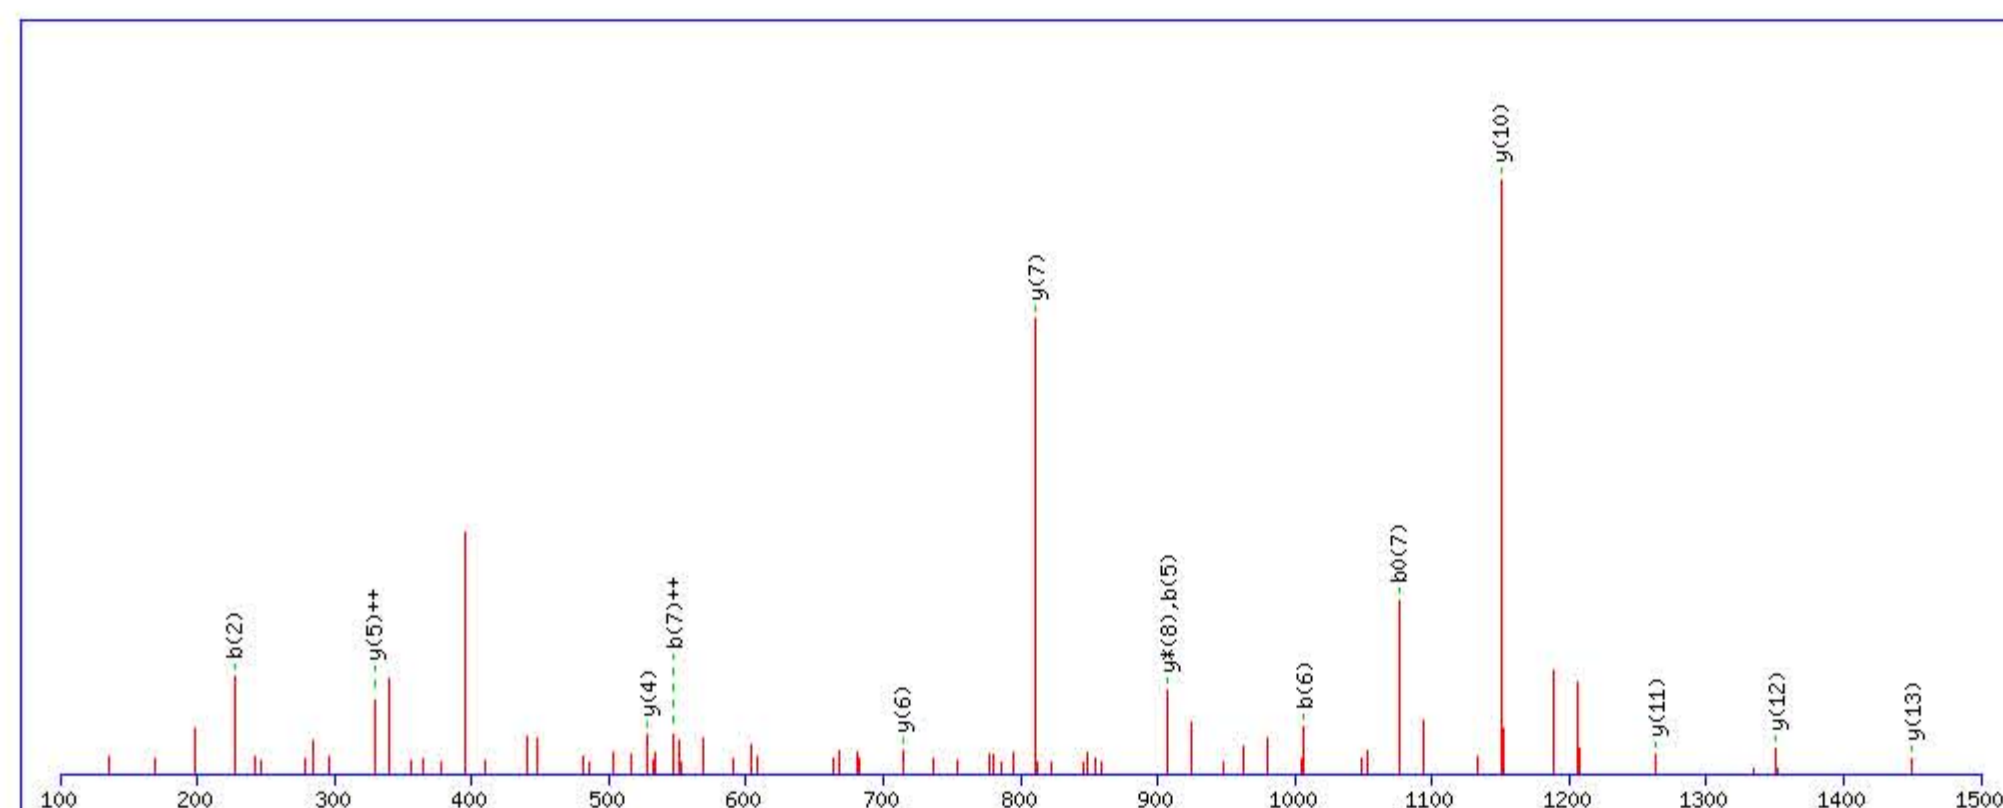

Monoisotopic mass of neutral peptide Mr(calc): 2355.258179

Fixed modifications: Carbamidomethyl (C) (apply to specified residues or termini only)

Variable modifications:

Q5 : Biotin:Thermo-21345 (Q)

Ions Score: 58 Expect: 2.3e-005

Matches : 14/182 fragment ions using 14 most intense peaks [\(help\)](#)

| #  | b                  | b <sup>++</sup>   | b <sup>*</sup> | b <sup>*++</sup> | b <sup>0</sup>     | b <sup>0++</sup> | Seq. | y                  | y <sup>++</sup>   | y <sup>*</sup>    | y <sup>*++</sup> | y <sup>0</sup> | y <sup>0++</sup> | #  |
|----|--------------------|-------------------|----------------|------------------|--------------------|------------------|------|--------------------|-------------------|-------------------|------------------|----------------|------------------|----|
| 1  | 114.091340         | 57.549308         |                |                  |                    |                  | L    |                    |                   |                   |                  |                |                  | 18 |
| 2  | <b>227.175404</b>  | 114.091340        |                |                  |                    |                  | L    | 2243.181426        | 1122.094351       | 2226.154877       | 1113.581076      | 2225.170861    | 1113.089068      | 17 |
| 3  | 340.259468         | 170.633372        |                |                  |                    |                  | L    | 2130.097362        | 1065.552319       | 2113.070813       | 1057.039044      | 2112.086797    | 1056.547036      | 16 |
| 4  | 468.318046         | 234.662661        | 451.291497     | 226.149386       |                    |                  | Q    | 2017.013298        | 1009.010287       | 1999.986749       | 1000.497013      | 1999.002733    | 1000.005005      | 15 |
| 5  | <b>907.543372</b>  | 454.275324        | 890.516823     | 445.762049       |                    |                  | Q    | 1888.954720        | 944.980998        | 1871.928171       | 936.467724       | 1870.944155    | 935.975715       | 14 |
| 6  | <b>1006.611786</b> | 503.809531        | 989.585237     | 495.296256       |                    |                  | V    | <b>1449.729394</b> | 725.368335        | 1432.702845       | 716.855061       | 1431.718829    | 716.363053       | 13 |
| 7  | 1093.643814        | <b>547.325545</b> | 1076.617265    | 538.812271       | <b>1075.633249</b> | 538.320263       | S    | <b>1350.660980</b> | 675.834128        | 1333.634431       | 667.320854       | 1332.650415    | 666.828846       | 12 |
| 8  | 1206.727878        | 603.867577        | 1189.701329    | 595.354303       | 1188.717313        | 594.862294       | L    | <b>1263.628952</b> | 632.318114        | 1246.602403       | 623.804840       | 1245.618387    | 623.312832       | 11 |
| 9  | 1303.780642        | 652.393959        | 1286.754093    | 643.880685       | 1285.770077        | 643.388676       | P    | <b>1150.544888</b> | 575.776082        | 1133.518339       | 567.262808       | 1132.534323    | 566.770800       | 10 |
| 10 | 1432.823235        | 716.915256        | 1415.796686    | 708.401981       | 1414.812670        | 707.909973       | E    | 1053.492124        | 527.249700        | 1036.465575       | 518.736426       | 1035.481559    | 518.244418       | 9  |
| 11 | 1545.907299        | 773.457288        | 1528.880750    | 764.944013       | 1527.896734        | 764.452005       | L    | 924.449531         | 462.728404        | <b>907.422982</b> | 454.215129       | 906.438966     | 453.723121       | 8  |
| 12 | 1642.960063        | 821.983670        | 1625.933514    | 813.470395       | 1624.949498        | 812.978387       | P    | <b>811.365467</b>  | 406.186372        | 794.338918        | 397.673097       | 793.354902     | 397.181089       | 7  |
| 13 | 1699.981527        | 850.494401        | 1682.954978    | 841.981127       | 1681.970962        | 841.489119       | G    | <b>714.312703</b>  | 357.659990        | 697.286154        | 349.146715       | 696.302138     | 348.654707       | 6  |
| 14 | 1829.024120        | 915.015698        | 1811.997571    | 906.502423       | 1811.013555        | 906.010415       | E    | 657.291239         | <b>329.149258</b> | 640.264690        | 320.635983       | 639.280674     | 320.143975       | 5  |
| 15 | 1992.087449        | 996.547362        | 1975.060900    | 988.034088       | 1974.076884        | 987.542080       | Y    | <b>528.248646</b>  | 264.627961        | 511.222097        | 256.114687       | 510.238081     | 255.622679       | 4  |
| 16 | 2079.119477        | 1040.063376       | 2062.092928    | 1031.550102      | 2061.108912        | 1031.058094      | S    | 365.185317         | 183.096297        | 348.158768        | 174.583022       | 347.174752     | 174.091014       | 3  |
| 17 | 2210.159962        | 1105.583619       | 2193.133413    | 1097.070344      | 2192.149397        | 1096.578336      | M    | 278.153289         | 139.580282        | 261.126740        | 131.067008       |                |                  | 2  |
| 18 |                    |                   |                |                  |                    |                  | K    | 147.112804         | 74.060040         | 130.086255        | 65.546765        |                |                  | 1  |

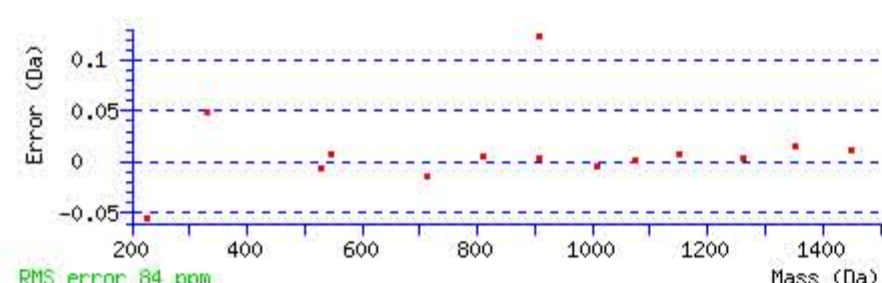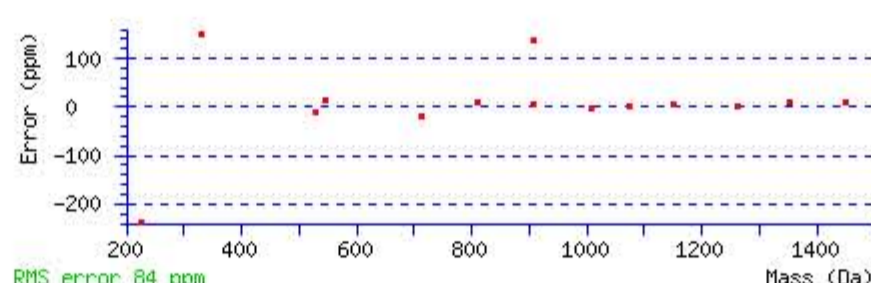

NCBI BLAST search of [LLLQQVSLPELPGEYSMK](#)

(Parameters: blastp, nr protein database, expect=20000, no filter, PAM30)

Other BLAST [web gateways](#)

## All matches to this query

| Score | Mr(calc):   | Delta     | Sequence                             |
|-------|-------------|-----------|--------------------------------------|
| 58.1  | 2355.258179 | 0.007063  | <a href="#">LLLQQVSLPELPGEYSMK</a>   |
| 58.1  | 2355.258179 | 0.007063  | <a href="#">LLLQQVSLPELPGEYSMK</a>   |
| 8.1   | 2355.288498 | -0.023256 | <a href="#">LIQERALLNFTWKR</a>       |
| 6.3   | 2355.288498 | -0.023256 | <a href="#">LIQERALLNFTWKR</a>       |
| 1.0   | 2355.273926 | -0.008684 | <a href="#">LGLYTFVNLANFVKSWTNLR</a> |
| 0.4   | 2355.299271 | -0.034029 | <a href="#">KLLQMOPAQHGEIIK</a>      |
| 0.3   | 2355.248795 | 0.016447  | <a href="#">FYEQVVQAIQRHIFDVK</a>    |

# Mascot Search Results

## Peptide View

MS/MS Fragmentation of **LLLQVSLPELPGEYSMK**

Found in **A2MG\_HUMAN**, Alpha-2-macroglobulin OS=Homo sapiens GN=A2M PE=1 SV=3

Match to Query 46029: 2371.261152 from(791.427660,3+) rtinseconds(2769) index(23560)

Title: Locus:1.1.1.3528.17 File:"2013-07-02 CLN FXIII 180 min 3rd F 2.wiff"

Data file C:\Program Files (x86)\Matrix Science\Mascot Daemon\mgf\9 FXIII 180 min 3rd\mascot\_daemon\_merge.mgf

Click mouse within plot area to zoom in by factor of two about that point

Or, Plot from  to  Da

Label all possible matches  Label matches used for scoring

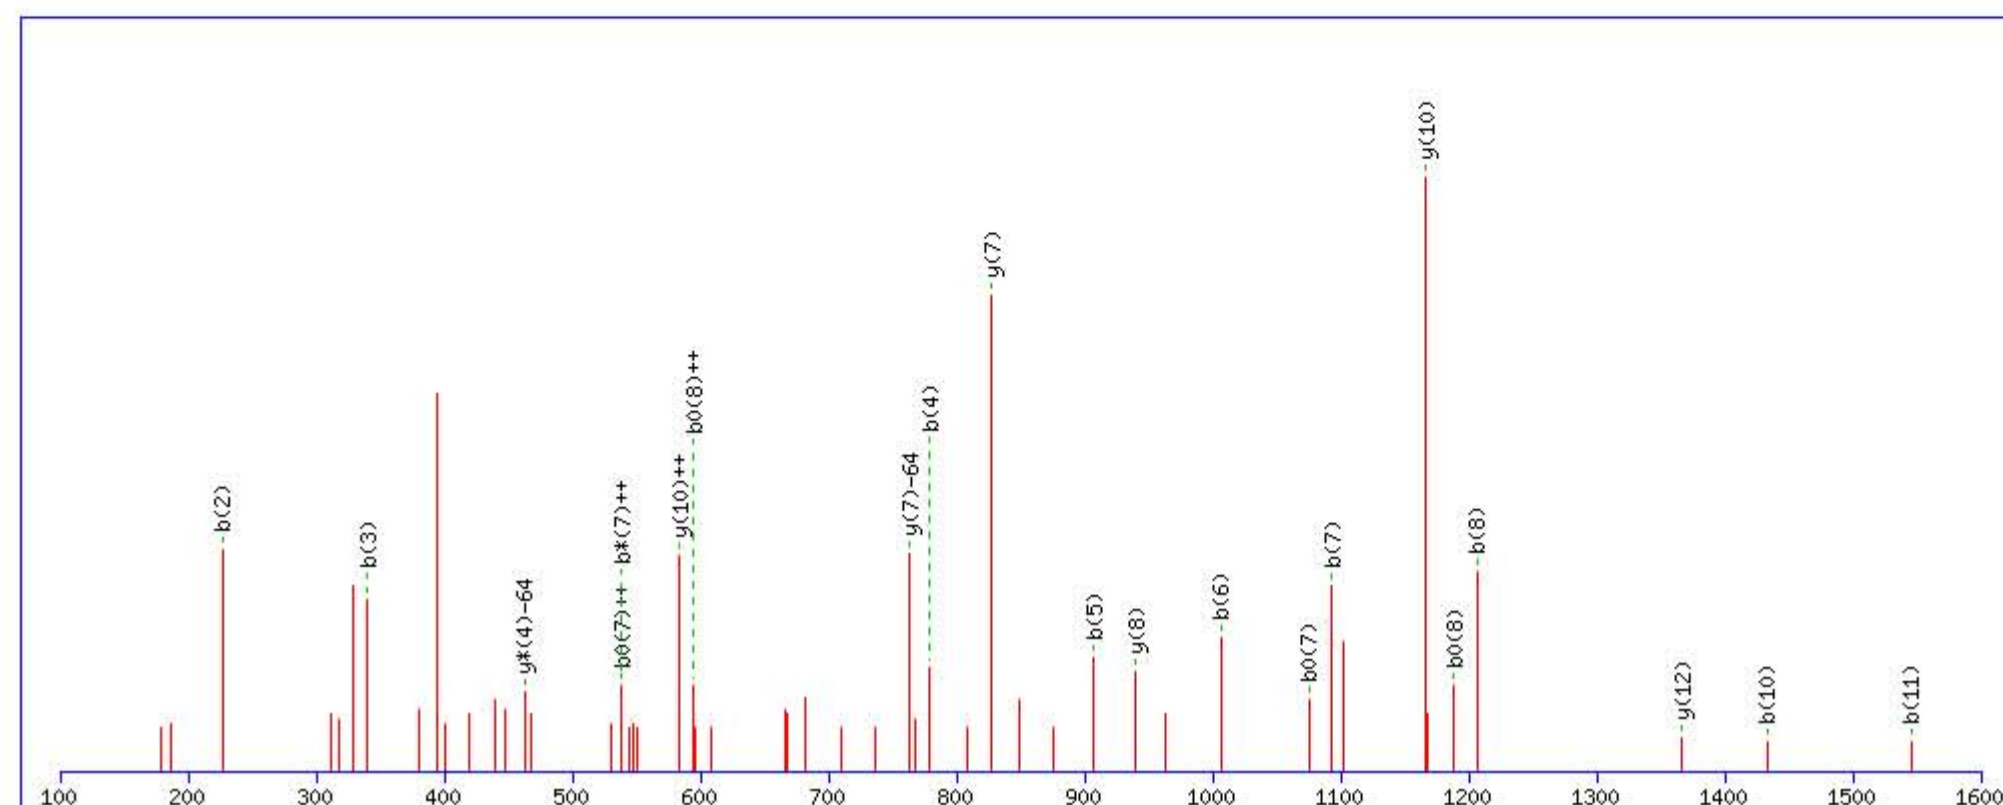

Monoisotopic mass of neutral peptide Mr(calc): 2371.253098

Fixed modifications: Carbamidomethyl (C) (apply to specified residues or termini only)

Variable modifications:

Q4 : Biotin:Thermo-21345 (Q)

M17 : Oxidation (M), with neutral losses 0.000000 (shown in table), 63.998285

Ions Score: 65 Expect: 6.8e-006

Matches : 21/282 fragment ions using 25 most intense peaks [\(help\)](#)

| #  | b                  | b <sup>++</sup> | b <sup>+</sup> | b <sup>+++</sup>  | b <sup>0</sup>     | b <sup>0++</sup>  | Seq. | y                  | y <sup>++</sup>   | y <sup>+</sup> | y <sup>+++</sup> | y <sup>0</sup> | y <sup>0++</sup> | #  |
|----|--------------------|-----------------|----------------|-------------------|--------------------|-------------------|------|--------------------|-------------------|----------------|------------------|----------------|------------------|----|
| 1  | 114.091340         | 57.549308       |                |                   |                    |                   | L    |                    |                   |                |                  |                |                  | 18 |
| 2  | <b>227.175404</b>  | 114.091340      |                |                   |                    |                   | L    | 2259.176341        | 1130.091808       | 2242.149792    | 1121.578534      | 2241.165776    | 1121.086526      | 17 |
| 3  | <b>340.259468</b>  | 170.633372      |                |                   |                    |                   | L    | 2146.092277        | 1073.549776       | 2129.065728    | 1065.036502      | 2128.081712    | 1064.544494      | 16 |
| 4  | <b>779.484794</b>  | 390.246035      | 762.458245     | 381.732760        |                    |                   | Q    | 2033.008213        | 1017.007745       | 2015.981664    | 1008.494470      | 2014.997648    | 1008.002462      | 15 |
| 5  | <b>907.543372</b>  | 454.275324      | 890.516823     | 445.762049        |                    |                   | Q    | 1593.782887        | 797.395082        | 1576.756338    | 788.881807       | 1575.772322    | 788.389799       | 14 |
| 6  | <b>1006.611786</b> | 503.809531      | 989.585237     | 495.296256        |                    |                   | V    | 1465.724309        | 733.365793        | 1448.697760    | 724.852518       | 1447.713744    | 724.360510       | 13 |
| 7  | <b>1093.643814</b> | 547.325545      | 1076.617265    | <b>538.812271</b> | <b>1075.633249</b> | <b>538.320263</b> | S    | <b>1366.655895</b> | 683.831586        | 1349.629346    | 675.318311       | 1348.645330    | 674.826303       | 12 |
| 8  | <b>1206.727878</b> | 603.867577      | 1189.701329    | 595.354303        | <b>1188.717313</b> | <b>594.862294</b> | L    | 1279.623867        | 640.315572        | 1262.597318    | 631.802297       | 1261.613302    | 631.310289       | 11 |
| 9  | 1303.780642        | 652.393959      | 1286.754093    | 643.880685        | 1285.770077        | 643.888676        | P    | <b>1166.539803</b> | <b>583.773540</b> | 1149.513254    | 575.260265       | 1148.529238    | 574.768257       | 10 |
| 10 | <b>1432.823235</b> | 716.915256      | 1415.796686    | 708.401981        | 1414.812670        | 707.909973        | E    | 1069.487039        | 535.247158        | 1052.460490    | 526.733883       | 1051.476474    | 526.241875       | 9  |
| 11 | <b>1545.907299</b> | 773.457288      | 1528.880750    | 764.944013        | 1527.896734        | 764.452005        | L    | <b>940.444446</b>  | 470.725861        | 923.417897     | 462.212587       | 922.433881     | 461.720579       | 8  |
| 12 | 1642.960063        | 821.983670      | 1625.933514    | 813.470395        | 1624.949498        | 812.978387        | P    | <b>827.360382</b>  | 414.183829        | 810.333833     | 405.670555       | 809.349817     | 405.178547       | 7  |
| 13 | 1699.981527        | 850.494401      | 1682.954978    | 841.981127        | 1681.970962        | 841.489119        | G    | 730.307618         | 365.657447        | 713.281069     | 357.144173       | 712.297053     | 356.652165       | 6  |
| 14 | 1829.024120        | 915.015698      | 1811.997571    | 906.502423        | 1811.013555        | 906.010415        | E    | 673.286154         | 337.146715        | 656.259605     | 328.633441       | 655.275589     | 328.141433       | 5  |
| 15 | 1992.087449        | 996.547362      | 1975.060900    | 988.034088        | 1974.076884        | 987.542080        | Y    | 544.243561         | 272.625419        | 527.217012     | 264.112144       | 526.232996     | 263.620136       | 4  |
| 16 | 2079.119477        | 1040.063376     | 2062.092928    | 1031.550102       | 2061.108912        | 1031.058094       | S    | 381.180232         | 191.093754        | 364.153683     | 182.580480       | 363.169667     | 182.088472       | 3  |
| 17 | 2226.154877        | 1113.581076     | 2209.128328    | 1105.067802       | 2208.144312        | 1104.575794       | M    | 294.148204         | 147.577740        | 277.121655     | 139.064466       |                |                  | 2  |
| 18 |                    |                 |                |                   |                    |                   | K    | 147.112804         | 74.060040         | 130.086255     | 65.546765        |                |                  | 1  |

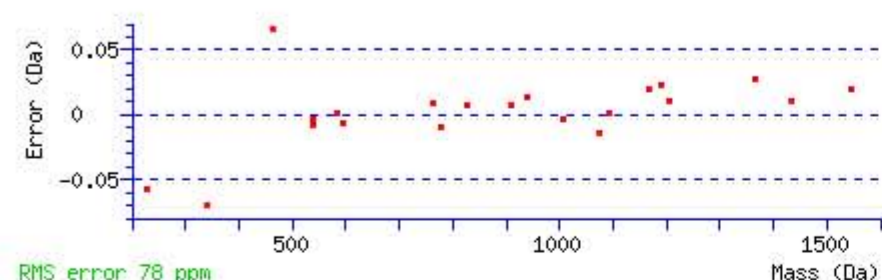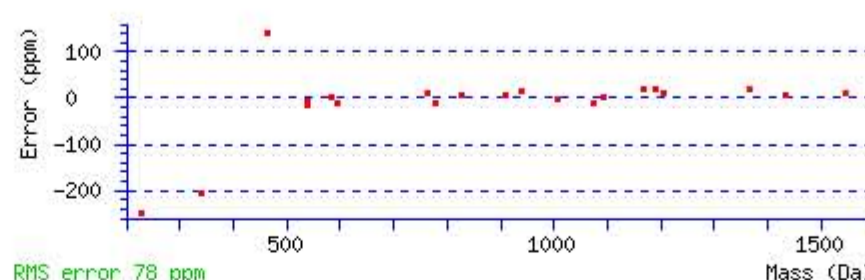

NCBI BLAST search of [LLLQVSLPELPGEYSMK](#)

(Parameters: blastp, nr protein database, expect=20000, no filter, PAM30)

Other BLAST [web gateways](#)

All matches to this query

| Score | Mr(calc):   | Delta    | Sequence                          |
|-------|-------------|----------|-----------------------------------|
| 65.0  | 2371.253098 | 0.008054 | <a href="#">LLLQVSLPELPGEYSMK</a> |
| 52.3  | 2371.253098 | 0.008054 | <a href="#">LLLQVSLPELPGEYSMK</a> |

# MASCOT Search Results

## Peptide View

MS/MS Fragmentation of **MCPQLQQYEMHGPEGLR**

Found in **A2MG\_HUMAN**, Alpha-2-macroglobulin OS=Homo sapiens GN=A2M PE=1 SV=3

Match to Query 46163: 2384.083392 from(795.701740,3+) rtinseconds(2056) index(32200)

Title: Locus:1.1.1.3379.18 File:"2013-07-02 CLN FXIII 180 min 3rd F 3.wiff"

Data file C:\Program Files (x86)\Matrix Science\Mascot Daemon\mgf\9 FXIII 180 min 3rd\mascot\_daemon\_merge.mgf

Click mouse within plot area to zoom in by factor of two about that point

Or, Plot from  to  Da

Label all possible matches  Label matches used for scoring

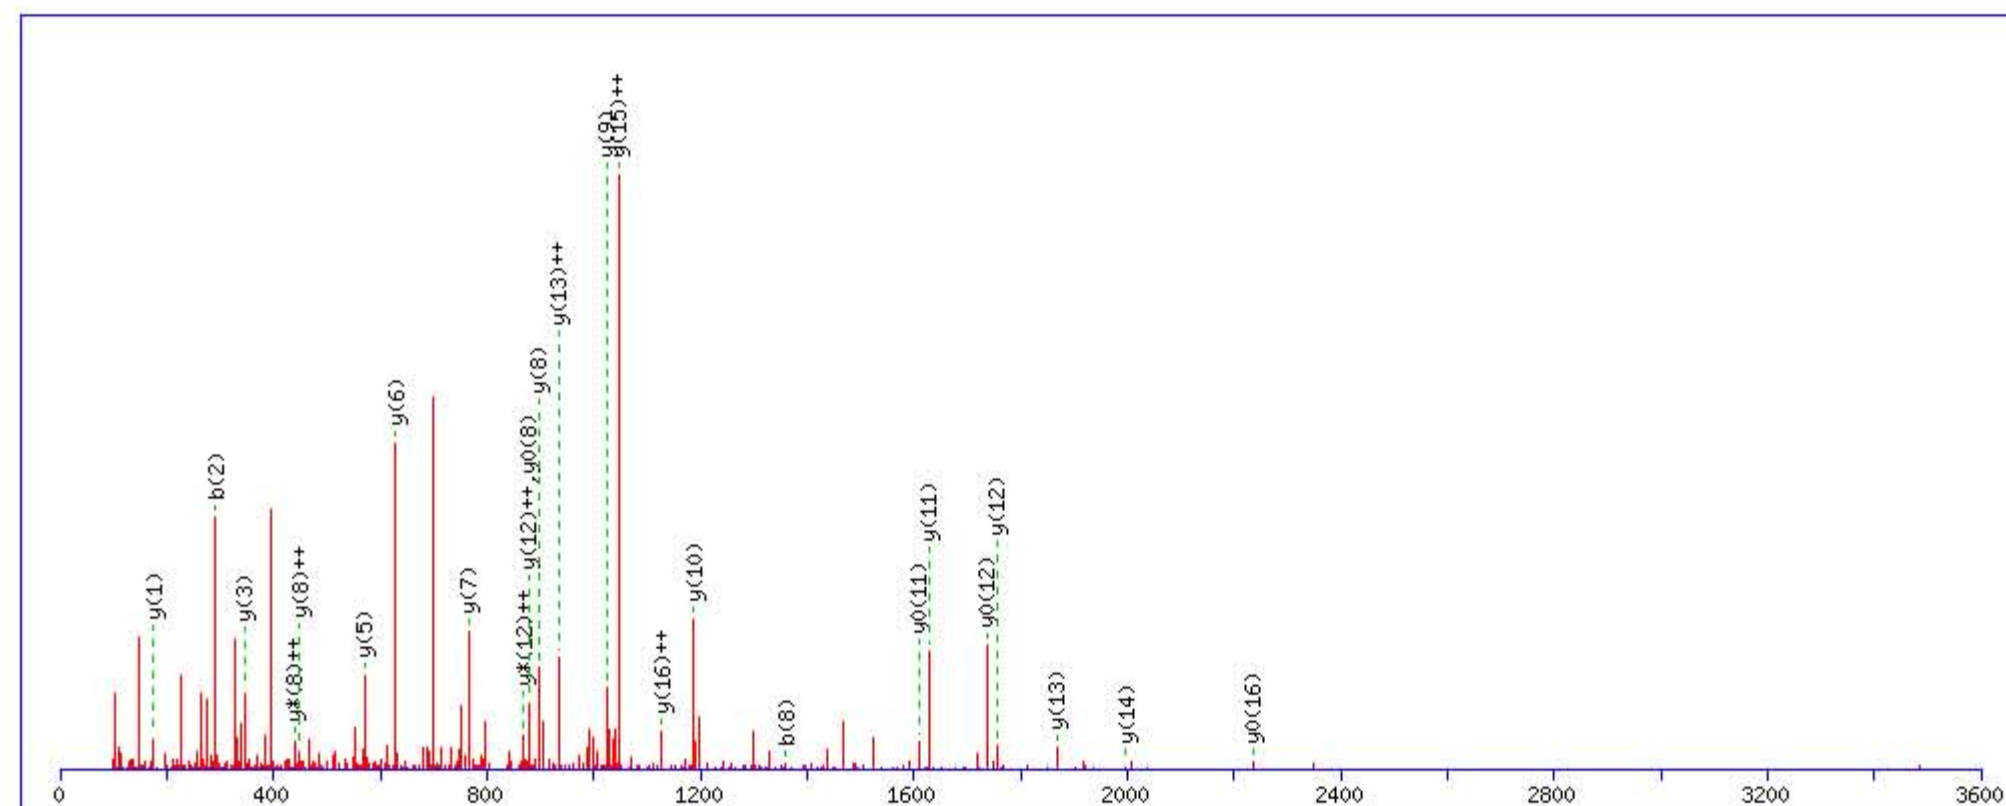

Monoisotopic mass of neutral peptide Mr(calc): 2384.089767

Fixed modifications: Carbamidomethyl (C) (apply to specified residues or termini only)

Variable modifications:

Q7 : Biotin:Thermo-21345 (Q)

Ions Score: 52 Expect: 5.7e-005

Matches : 25/164 fragment ions using 61 most intense peaks [\(help\)](#)

| #  | b                  | b <sup>++</sup> | b <sup>+</sup> | b <sup>+++</sup> | b <sup>0</sup> | b <sup>0++</sup> | Seq. | y                  | y <sup>++</sup>    | y <sup>+</sup> | y <sup>+++</sup>  | y <sup>0</sup>     | y <sup>0++</sup> | #  |
|----|--------------------|-----------------|----------------|------------------|----------------|------------------|------|--------------------|--------------------|----------------|-------------------|--------------------|------------------|----|
| 1  | 132.047761         | 66.527518       |                |                  |                |                  | M    |                    |                    |                |                   |                    |                  | 17 |
| 2  | <b>292.078410</b>  | 146.542843      |                |                  |                |                  | C    | 2254.056579        | <b>1127.531927</b> | 2237.030030    | 1119.018653       | <b>2236.046014</b> | 1118.526645      | 16 |
| 3  | 389.131174         | 195.069225      |                |                  |                |                  | P    | 2094.025930        | <b>1047.516603</b> | 2076.999381    | 1039.003328       | 2076.015365        | 1038.511320      | 15 |
| 4  | 517.189752         | 259.098514      | 500.163203     | 250.585240       |                |                  | Q    | <b>1996.973166</b> | 998.990221         | 1979.946617    | 990.476947        | 1978.962601        | 989.984939       | 14 |
| 5  | 630.273816         | 315.640546      | 613.247267     | 307.127272       |                |                  | L    | <b>1868.914588</b> | <b>934.960932</b>  | 1851.888039    | 926.447658        | 1850.904023        | 925.955650       | 13 |
| 6  | 758.332394         | 379.669835      | 741.305845     | 371.156561       |                |                  | Q    | <b>1755.830524</b> | <b>878.418900</b>  | 1738.803975    | <b>869.905626</b> | <b>1737.819959</b> | 869.413618       | 12 |
| 7  | 1197.557720        | 599.282498      | 1180.531171    | 590.769224       |                |                  | Q    | <b>1627.771946</b> | 814.389611         | 1610.745397    | 805.876337        | <b>1609.761381</b> | 805.384329       | 11 |
| 8  | <b>1360.621049</b> | 680.814163      | 1343.594500    | 672.300888       |                |                  | Y    | <b>1188.546620</b> | 594.776948         | 1171.520071    | 586.263674        | 1170.536055        | 585.771666       | 10 |
| 9  | 1489.663642        | 745.335459      | 1472.637093    | 736.822185       | 1471.653077    | 736.330177       | E    | <b>1025.483291</b> | 513.245284         | 1008.456742    | 504.732009        | 1007.472726        | 504.240001       | 9  |
| 10 | 1620.704127        | 810.855702      | 1603.677578    | 802.342427       | 1602.693562    | 801.850419       | M    | <b>896.440698</b>  | <b>448.723987</b>  | 879.414149     | <b>440.210713</b> | <b>878.430133</b>  | 439.718705       | 8  |
| 11 | 1757.763039        | 879.385158      | 1740.736490    | 870.871883       | 1739.752474    | 870.379875       | H    | <b>765.400213</b>  | 383.203745         | 748.373664     | 374.690470        | 747.389648         | 374.198462       | 7  |
| 12 | 1814.784503        | 907.895890      | 1797.757954    | 899.382615       | 1796.773938    | 898.890607       | G    | <b>628.341301</b>  | 314.674289         | 611.314752     | 306.161014        | 610.330736         | 305.669006       | 6  |
| 13 | 1911.837267        | 956.422272      | 1894.810718    | 947.908997       | 1893.826702    | 947.416989       | P    | <b>571.319837</b>  | 286.163557         | 554.293288     | 277.650282        | 553.309272         | 277.158274       | 5  |
| 14 | 2040.879860        | 1020.943568     | 2023.853311    | 1012.430294      | 2022.869295    | 1011.938286      | E    | 474.267073         | 237.637175         | 457.240524     | 229.123900        | 456.256508         | 228.631892       | 4  |
| 15 | 2097.901324        | 1049.454300     | 2080.874775    | 1040.941025      | 2079.890759    | 1040.449017      | G    | <b>345.224480</b>  | 173.115878         | 328.197931     | 164.602603        |                    |                  | 3  |
| 16 | 2210.985388        | 1105.996332     | 2193.958839    | 1097.483057      | 2192.974823    | 1096.991049      | L    | 288.203016         | 144.605146         | 271.176467     | 136.091872        |                    |                  | 2  |
| 17 |                    |                 |                |                  |                |                  | R    | <b>175.118952</b>  | 88.063114          | 158.092403     | 79.549839         |                    |                  | 1  |

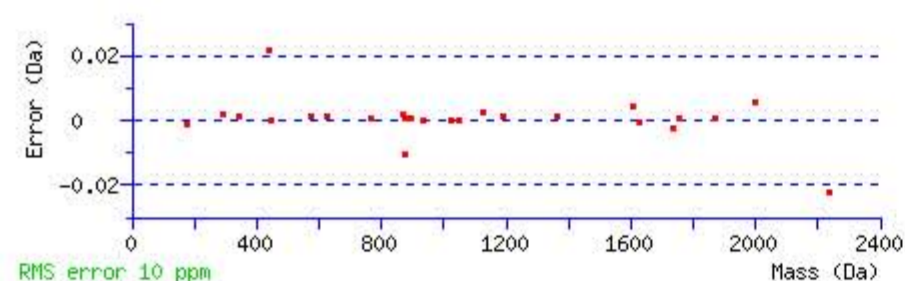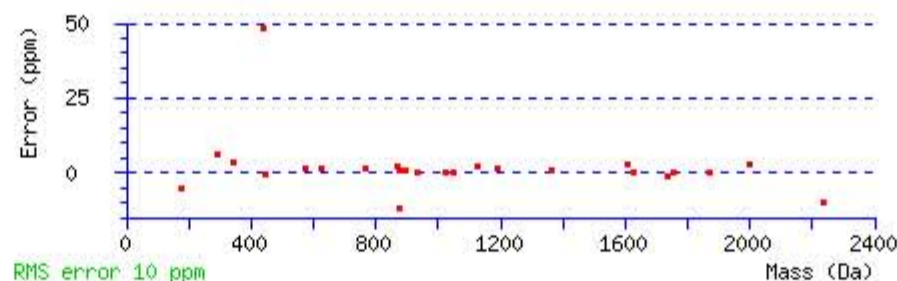

NCBI BLAST search of [MCPQLQQYEMHGPEGLR](#)

(Parameters: blastp, nr protein database, expect=20000, no filter, PAM30)

Other BLAST [web gateways](#)

## All matches to this query

| Score | Mr(calc):   | Delta     | Sequence                          |
|-------|-------------|-----------|-----------------------------------|
| 52.2  | 2384.089767 | -0.006375 | <a href="#">MCPQLQQYEMHGPEGLR</a> |
| 42.8  | 2384.089767 | -0.006375 | <a href="#">MCPQLQQYEMHGPEGLR</a> |
| 23.0  | 2384.089767 | -0.006375 | <a href="#">MCPQLQQYEMHGPEGLR</a> |

Mascot: <http://www.matrixscience.com/>

# MASCOT Search Results

## Peptide View

MS/MS Fragmentation of **MCPQLQQYEMHGPEGLR**

Found in **A2MG\_HUMAN**, Alpha-2-macroglobulin OS=Homo sapiens GN=A2M PE=1 SV=3

Match to Query 46165: 2384.084832 from(795.702220,3+) rtinseconds(2076) index(19457)

Title: Locus:1.1.1.3288.17 File:"2013-07-02 CLN FXIII 180 min 3rd F 2.wiff"

Data file C:\Program Files (x86)\Matrix Science\Mascot Daemon\mgf\9 FXIII 180 min 3rd\mascot\_daemon\_merge.mgf

Click mouse within plot area to zoom in by factor of two about that point

Or, Plot from  to  Da

Label all possible matches  Label matches used for scoring

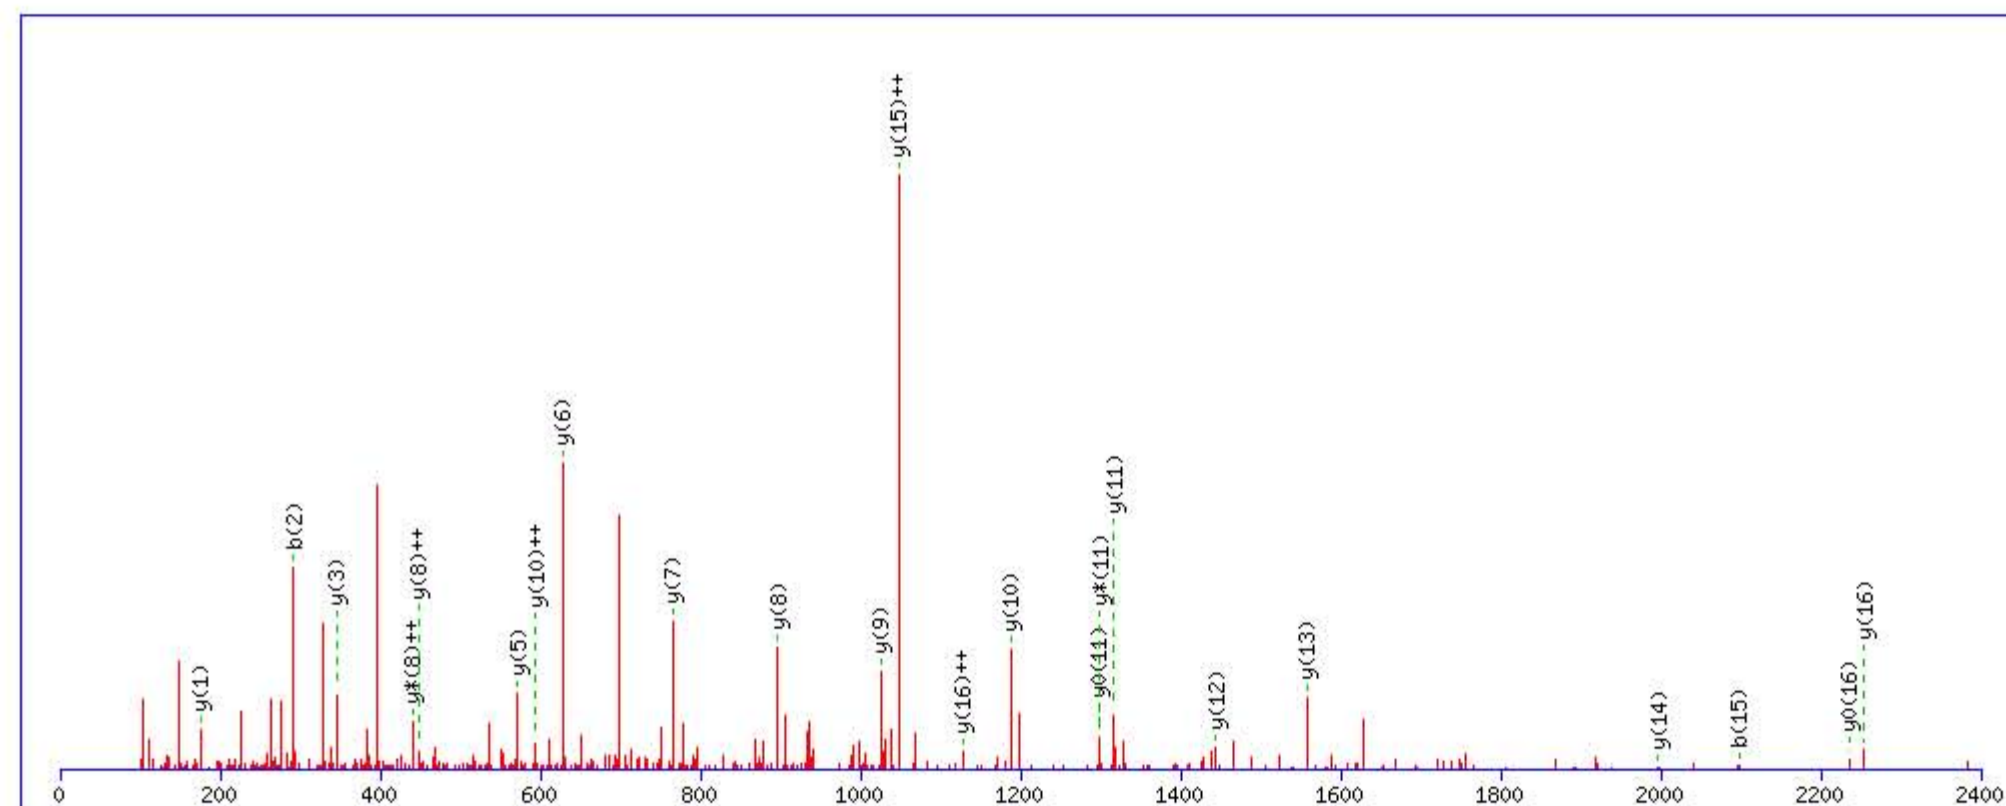

Monoisotopic mass of neutral peptide Mr(calc): 2384.089767

Fixed modifications: Carbamidomethyl (C) (apply to specified residues or termini only)

Variable modifications:

Q4 : Biotin:Thermo-21345 (Q)

Ions Score: 56 Expect: 2.4e-005

Matches : 23/164 fragment ions using 62 most intense peaks [\(help\)](#)

| #  | b                  | b <sup>++</sup> | b <sup>+</sup> | b <sup>+++</sup> | b <sup>0</sup> | b <sup>0++</sup> | Seq. | y                  | y <sup>++</sup>    | y <sup>+</sup>     | y <sup>+++</sup>  | y <sup>0</sup>     | y <sup>0++</sup> | #  |
|----|--------------------|-----------------|----------------|------------------|----------------|------------------|------|--------------------|--------------------|--------------------|-------------------|--------------------|------------------|----|
| 1  | 132.047761         | 66.527518       |                |                  |                |                  | M    |                    |                    |                    |                   |                    |                  | 17 |
| 2  | <b>292.078410</b>  | 146.542843      |                |                  |                |                  | C    | <b>2254.056579</b> | <b>1127.531927</b> | 2237.030030        | 1119.018653       | <b>2236.046014</b> | 1118.526645      | 16 |
| 3  | 389.131174         | 195.069225      |                |                  |                |                  | P    | 2094.025930        | <b>1047.516603</b> | 2076.999381        | 1039.003328       | 2076.015365        | 1038.511320      | 15 |
| 4  | 828.356500         | 414.681888      | 811.329951     | 406.168614       |                |                  | Q    | <b>1996.973166</b> | 998.990221         | 1979.946617        | 990.476947        | 1978.962601        | 989.984939       | 14 |
| 5  | 941.440564         | 471.223920      | 924.414015     | 462.710646       |                |                  | L    | <b>1557.747840</b> | 779.377558         | 1540.721291        | 770.864284        | 1539.737275        | 770.372276       | 13 |
| 6  | 1069.499142        | 535.253209      | 1052.472593    | 526.739935       |                |                  | Q    | <b>1444.663776</b> | 722.835526         | 1427.637227        | 714.322252        | 1426.653211        | 713.830244       | 12 |
| 7  | 1197.557720        | 599.282498      | 1180.531171    | 590.769224       |                |                  | Q    | <b>1316.605198</b> | 658.806237         | <b>1299.578649</b> | 650.292963        | <b>1298.594633</b> | 649.800955       | 11 |
| 8  | 1360.621049        | 680.814163      | 1343.594500    | 672.300888       |                |                  | Y    | <b>1188.546620</b> | <b>594.776948</b>  | 1171.520071        | 586.263674        | 1170.536055        | 585.771666       | 10 |
| 9  | 1489.663642        | 745.335459      | 1472.637093    | 736.822185       | 1471.653077    | 736.330177       | E    | <b>1025.483291</b> | 513.245284         | 1008.456742        | 504.732009        | 1007.472726        | 504.240001       | 9  |
| 10 | 1620.704127        | 810.855702      | 1603.677578    | 802.342427       | 1602.693562    | 801.850419       | M    | <b>896.440698</b>  | <b>448.723987</b>  | 879.414149         | <b>440.210713</b> | 878.430133         | 439.718705       | 8  |
| 11 | 1757.763039        | 879.385158      | 1740.736490    | 870.871883       | 1739.752474    | 870.379875       | H    | <b>765.400213</b>  | 383.203745         | 748.373664         | 374.690470        | 747.389648         | 374.198462       | 7  |
| 12 | 1814.784503        | 907.895890      | 1797.757954    | 899.382615       | 1796.773938    | 898.890607       | G    | <b>628.341301</b>  | 314.674289         | 611.314752         | 306.161014        | 610.330736         | 305.669006       | 6  |
| 13 | 1911.837267        | 956.422272      | 1894.810718    | 947.908997       | 1893.826702    | 947.416989       | P    | <b>571.319837</b>  | 286.163557         | 554.293288         | 277.650282        | 553.309272         | 277.158274       | 5  |
| 14 | 2040.879860        | 1020.943568     | 2023.853311    | 1012.430294      | 2022.869295    | 1011.938286      | E    | 474.267073         | 237.637175         | 457.240524         | 229.123900        | 456.256508         | 228.631892       | 4  |
| 15 | <b>2097.901324</b> | 1049.454300     | 2080.874775    | 1040.941025      | 2079.890759    | 1040.449017      | G    | <b>345.224480</b>  | 173.115878         | 328.197931         | 164.602603        |                    |                  | 3  |
| 16 | 2210.985388        | 1105.996332     | 2193.958839    | 1097.483057      | 2192.974823    | 1096.991049      | L    | 288.203016         | 144.605146         | 271.176467         | 136.091872        |                    |                  | 2  |
| 17 |                    |                 |                |                  |                |                  | R    | <b>175.118952</b>  | 88.063114          | 158.092403         | 79.549839         |                    |                  | 1  |

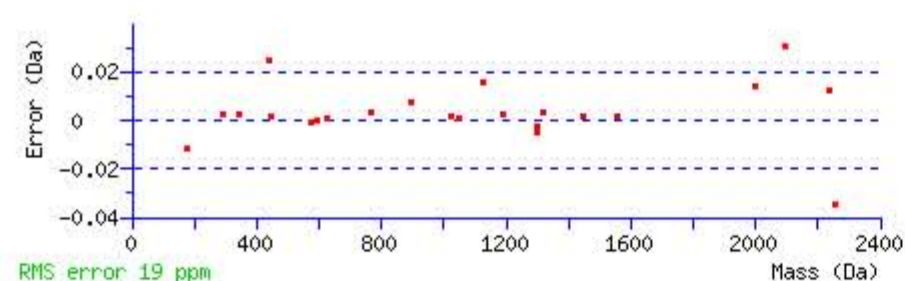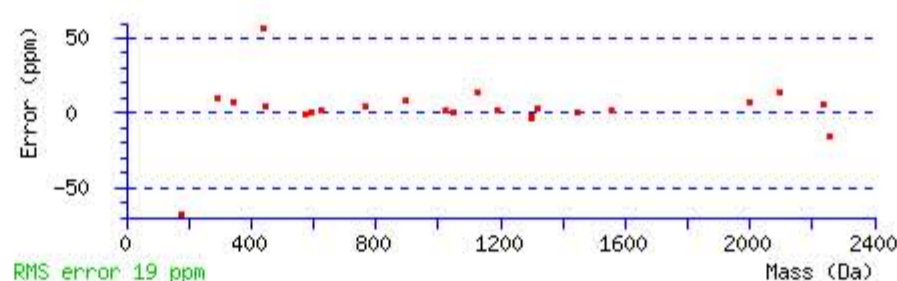

NCBI BLAST search of [MCPQLQQYEMHGPEGLR](#)

(Parameters: blastp, nr protein database, expect=20000, no filter, PAM30)

Other BLAST [web gateways](#)

## All matches to this query

| Score | Mr(calc):   | Delta     | Sequence                          |
|-------|-------------|-----------|-----------------------------------|
| 56.1  | 2384.089767 | -0.004935 | <a href="#">MCPQLQQYEMHGPEGLR</a> |
| 49.4  | 2384.089767 | -0.004935 | <a href="#">MCPQLQQYEMHGPEGLR</a> |
| 47.9  | 2384.089767 | -0.004935 | <a href="#">MCPQLQQYEMHGPEGLR</a> |

Mascot: <http://www.matrixscience.com/>



# MASCOT Search Results

## Peptide View

MS/MS Fragmentation of **MCPQLQQYEMHGPEGLR**

Found in **A2MG\_HUMAN**, Alpha-2-macroglobulin OS=Homo sapiens GN=A2M PE=1 SV=3

Match to Query 46425: 2400.075432 from(801.032420,3+) rtinseconds(1983) index(18992)

Title: Locus:1.1.1.3256.12 File:"2013-07-02 CLN FXIII 180 min 3rd F 2.wiff"

Data file C:\Program Files (x86)\Matrix Science\Mascot Daemon\mgf\9 FXIII 180 min 3rd\mascot\_daemon\_merge.mgf

Click mouse within plot area to zoom in by factor of two about that point

Or, Plot from  to  Da

Label all possible matches  Label matches used for scoring

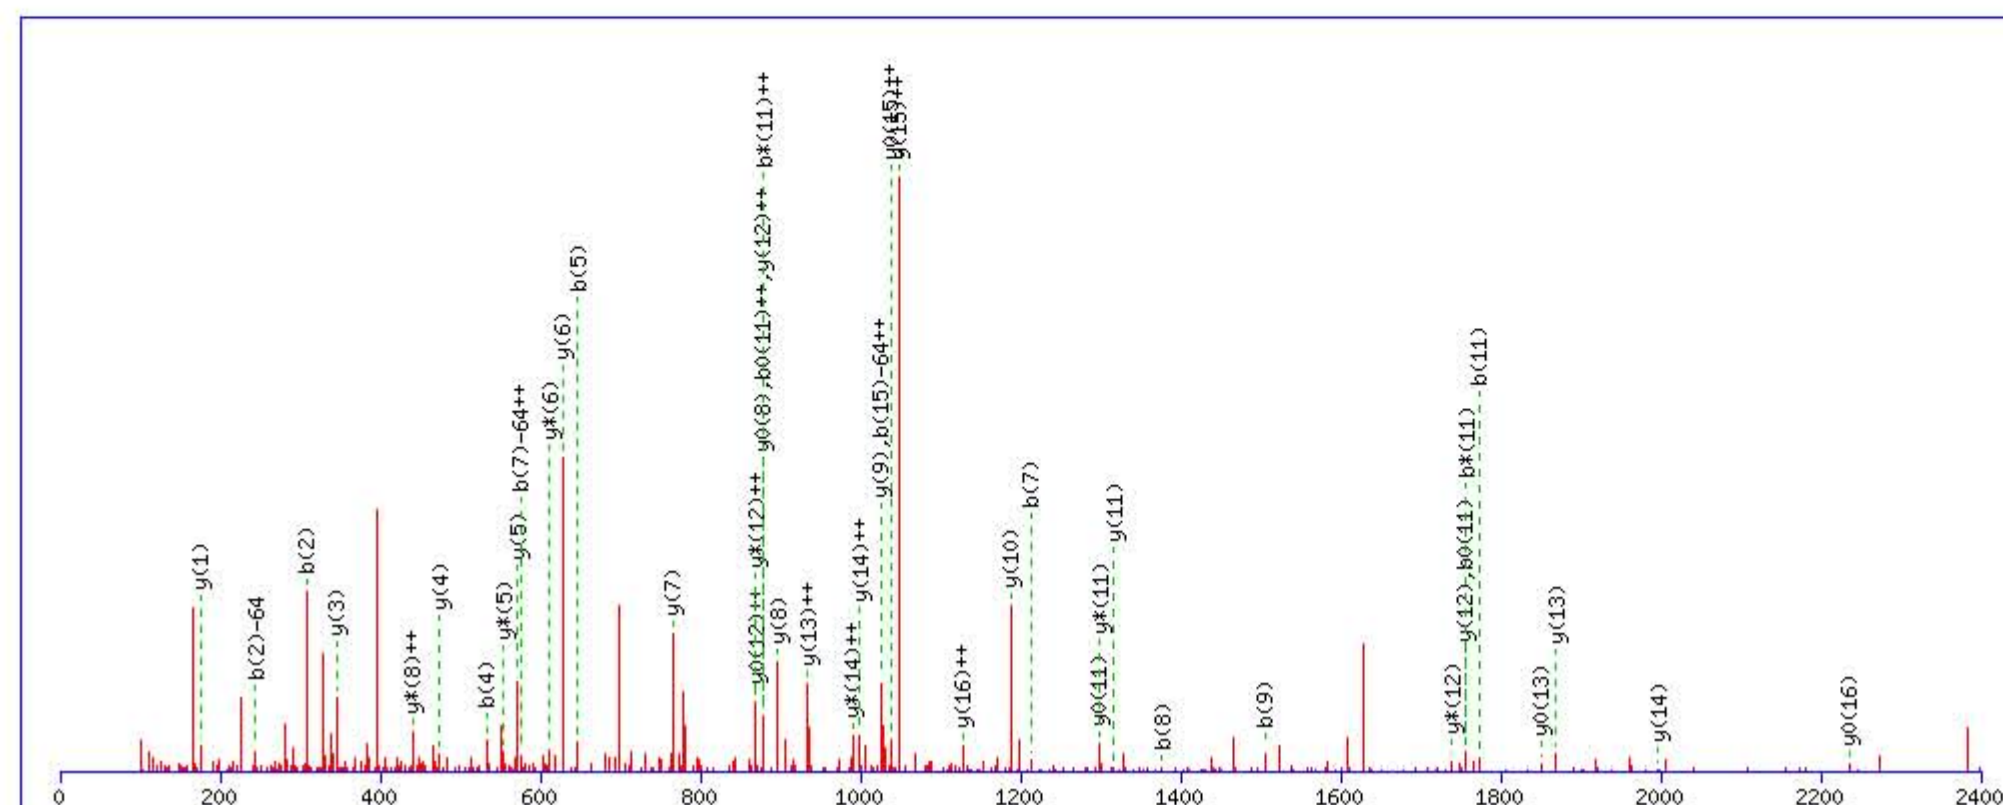

Monoisotopic mass of neutral peptide Mr(calc): 2400.084686

Fixed modifications: Carbamidomethyl (C) (apply to specified residues or termini only)

Variable modifications:

M1 : Oxidation (M), with neutral losses 0.000000 (shown in table), 63.998285

Q6 : Biotin:Thermo-21345 (Q)

Ions Score: 49 Expect: 8.6e-005

Matches : 45/238 fragment ions using 106 most intense peaks [\(help\)](#)

| #  | b                  | b <sup>++</sup> | b <sup>+</sup>     | b <sup>+++</sup>  | b <sup>0</sup>     | b <sup>0++</sup>  | Seq. | y                  | y <sup>++</sup>    | y <sup>+</sup>     | y <sup>+++</sup>  | y <sup>0</sup>     | y <sup>0++</sup>   | #  |
|----|--------------------|-----------------|--------------------|-------------------|--------------------|-------------------|------|--------------------|--------------------|--------------------|-------------------|--------------------|--------------------|----|
| 1  | 148.042676         | 74.524976       |                    |                   |                    |                   | M    |                    |                    |                    |                   |                    |                    | 17 |
| 2  | <b>308.073325</b>  | 154.540301      |                    |                   |                    |                   | C    | 2254.056579        | <b>1127.531927</b> | 2237.030030        | 1119.018653       | <b>2236.046014</b> | 1118.526645        | 16 |
| 3  | 405.126089         | 203.066683      |                    |                   |                    |                   | P    | 2094.025930        | <b>1047.516603</b> | 2076.999381        | 1039.003328       | 2076.015365        | <b>1038.511320</b> | 15 |
| 4  | <b>533.184667</b>  | 267.095972      | 516.158118         | 258.582697        |                    |                   | Q    | <b>1996.973166</b> | <b>998.990221</b>  | 1979.946617        | <b>990.476947</b> | 1978.962601        | 989.984939         | 14 |
| 5  | <b>646.268731</b>  | 323.638004      | 629.242182         | 315.124729        |                    |                   | L    | <b>1868.914588</b> | <b>934.960932</b>  | 1851.888039        | 926.447658        | <b>1850.904023</b> | 925.955650         | 13 |
| 6  | 1085.494057        | 543.250667      | 1068.467508        | 534.737392        |                    |                   | Q    | <b>1755.830524</b> | <b>878.418900</b>  | <b>1738.803975</b> | <b>869.905626</b> | 1737.819959        | <b>869.413618</b>  | 12 |
| 7  | <b>1213.552635</b> | 607.279956      | 1196.526086        | 598.766681        |                    |                   | Q    | <b>1316.605198</b> | 658.806237         | <b>1299.578649</b> | 650.292963        | <b>1298.594633</b> | 649.800955         | 11 |
| 8  | <b>1376.615964</b> | 688.811620      | 1359.589415        | 680.298346        |                    |                   | Y    | <b>1188.546620</b> | 594.776948         | 1171.520071        | 586.263674        | 1170.536055        | 585.771666         | 10 |
| 9  | <b>1505.658557</b> | 753.332917      | 1488.632008        | 744.819642        | 1487.647992        | 744.327634        | E    | <b>1025.483291</b> | 513.245284         | 1008.456742        | 504.732009        | 1007.472726        | 504.240001         | 9  |
| 10 | 1636.699042        | 818.853159      | 1619.672493        | 810.339885        | 1618.688477        | 809.847877        | M    | <b>896.440698</b>  | 448.723987         | 879.414149         | <b>440.210713</b> | <b>878.430133</b>  | 439.718705         | 8  |
| 11 | <b>1773.757954</b> | 887.382615      | <b>1756.731405</b> | <b>878.869341</b> | <b>1755.747389</b> | <b>878.377333</b> | H    | <b>765.400213</b>  | 383.203745         | 748.373664         | 374.690470        | 747.389648         | 374.198462         | 7  |
| 12 | 1830.779418        | 915.893347      | 1813.752869        | 907.380073        | 1812.768853        | 906.888065        | G    | <b>628.341301</b>  | 314.674289         | <b>611.314752</b>  | 306.161014        | 610.330736         | 305.669006         | 6  |
| 13 | 1927.832182        | 964.419729      | 1910.805633        | 955.906455        | 1909.821617        | 955.414447        | P    | <b>571.319837</b>  | 286.163557         | <b>554.293288</b>  | 277.650282        | 553.309272         | 277.158274         | 5  |
| 14 | 2056.874775        | 1028.941026     | 2039.848226        | 1020.427751       | 2038.864210        | 1019.935743       | E    | <b>474.267073</b>  | 237.637175         | 457.240524         | 229.123900        | 456.256508         | 228.631892         | 4  |
| 15 | 2113.896239        | 1057.451758     | 2096.869690        | 1048.938483       | 2095.885674        | 1048.446475       | G    | <b>345.224480</b>  | 173.115878         | 328.197931         | 164.602603        |                    |                    | 3  |
| 16 | 2226.980303        | 1113.993790     | 2209.953754        | 1105.480515       | 2208.969738        | 1104.988507       | L    | 288.203016         | 144.605146         | 271.176467         | 136.091872        |                    |                    | 2  |
| 17 |                    |                 |                    |                   |                    |                   | R    | <b>175.118952</b>  | 88.063114          | 158.092403         | 79.549839         |                    |                    | 1  |

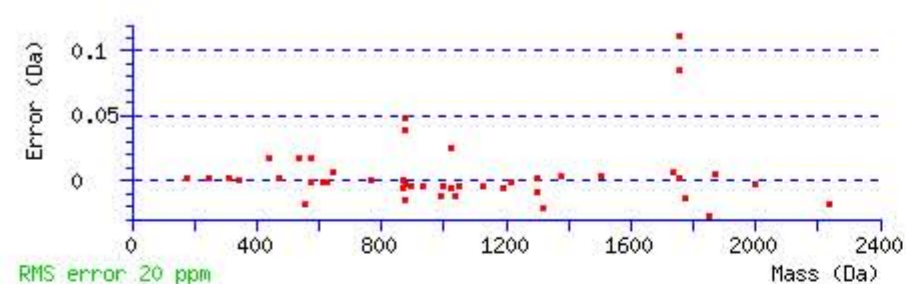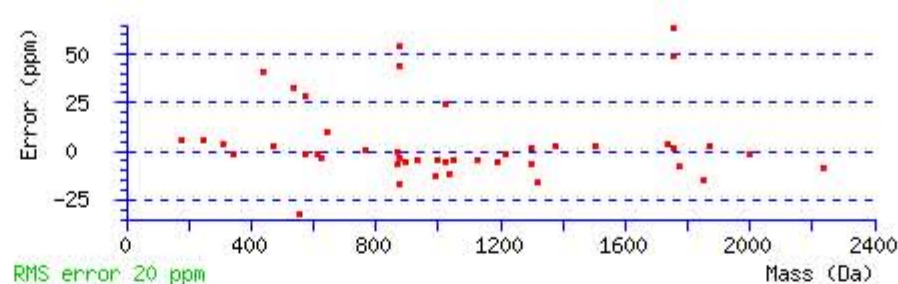

NCBI BLAST search of [MCPQLQQYEMHGPEGLR](#)

(Parameters: blastp, nr protein database, expect=20000, no filter, PAM30)

Other BLAST [web gateways](#)

All matches to this query

| Score | Mr(calc):   | Delta     | Sequence                          |
|-------|-------------|-----------|-----------------------------------|
| 49.4  | 2400.084686 | -0.009254 | <a href="#">MCPQLQQYEMHGPEGLR</a> |
| 48.7  | 2400.084686 | -0.009254 | <a href="#">MCPQLQQYEMHGPEGLR</a> |
| 30.3  | 2400.084686 | -0.009254 | <a href="#">MCPQLQQYEMHGPEGLR</a> |

Mascot: <http://www.matrixscience.com/>

# MASCOT Search Results

## Peptide View

MS/MS Fragmentation of **YSDASDCHGEDSQAFCEK**

Found in **A2MG\_HUMAN**, Alpha-2-macroglobulin OS=Homo sapiens GN=A2M PE=1 SV=3

Match to Query 46696: 2415.923292 from(806.315040,3+) rtinseconds(1583) index(16396)

Title: Locus:1.1.1.3117.10 File:"2013-07-02 CLN FXIII 180 min 3rd F 2.wiff"

Data file C:\Program Files (x86)\Matrix Science\Mascot Daemon\mgf9 FXIII 180 min 3rd\mascot\_daemon\_merge.mgf

Click mouse within plot area to zoom in by factor of two about that point

Or, Plot from  to  Da

Label all possible matches  Label matches used for scoring

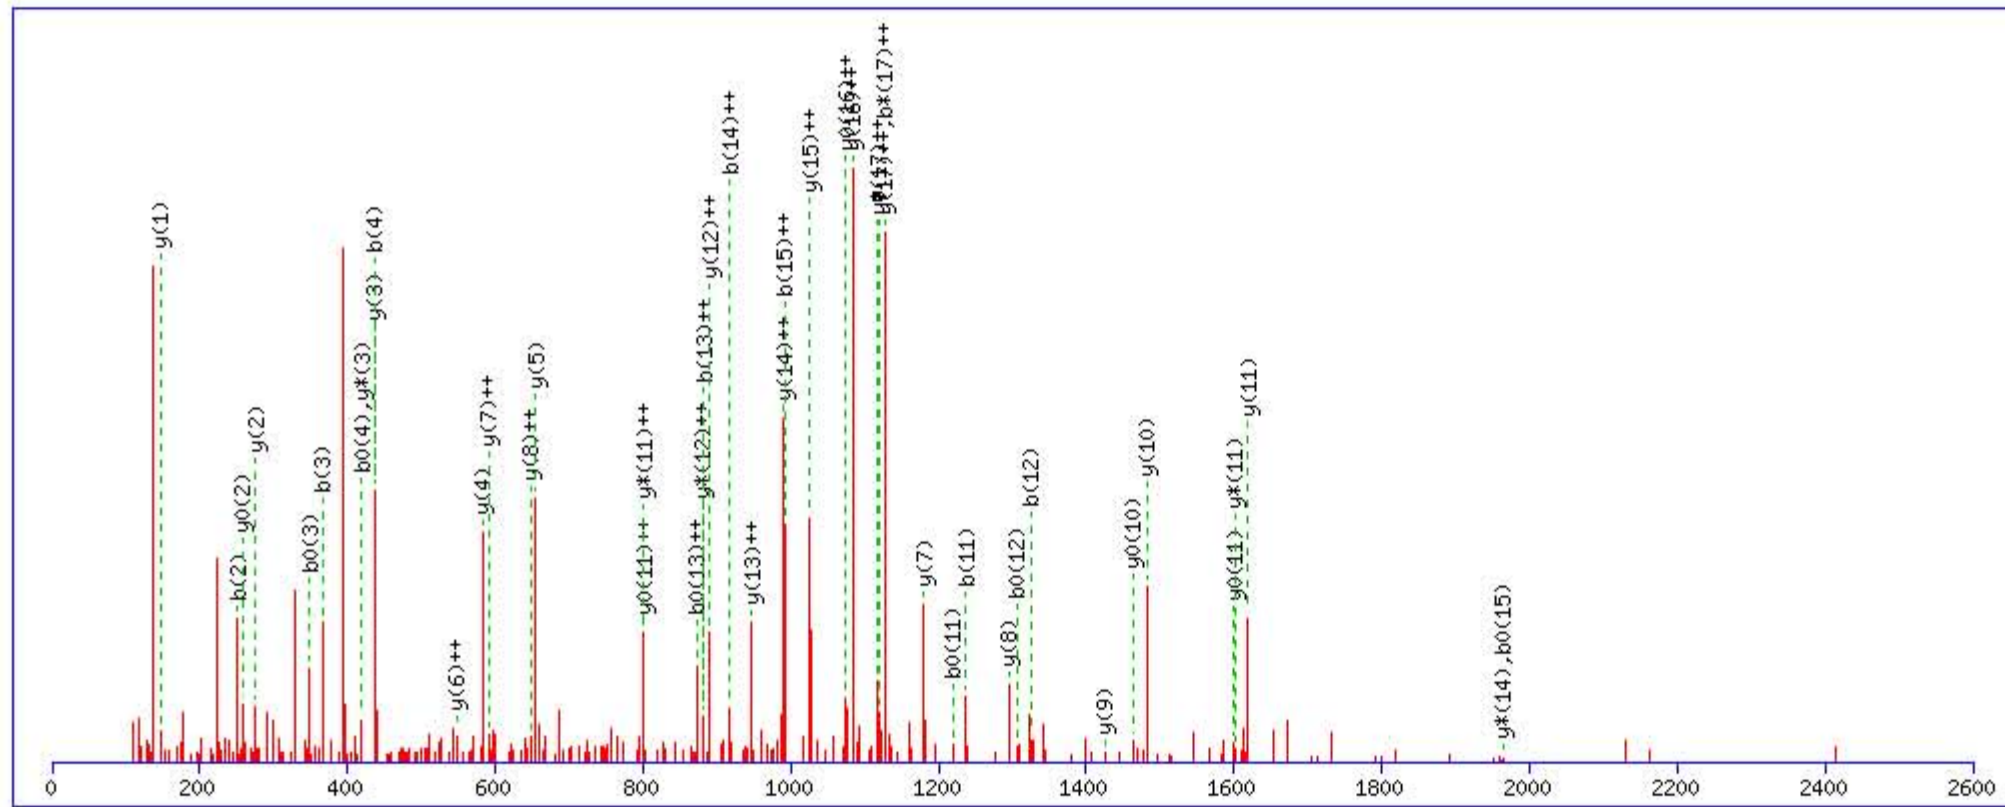

Monoisotopic mass of neutral peptide Mr(calc): 2415.940598

Fixed modifications: Carbamidomethyl (C) (apply to specified residues or termini only)

Variable modifications:

Q13 : Biotin:Thermo-21345 (Q)

Ions Score: 49 Expect: 1.3e-005

Matches : 46/176 fragment ions using 110 most intense peaks [\(help\)](#)

| #  | b                  | b <sup>++</sup>   | b <sup>*</sup> | b <sup>*++</sup>   | b <sup>0</sup>     | b <sup>0++</sup>  | Seq. | y                  | y <sup>++</sup>    | y <sup>*</sup>     | y <sup>*++</sup>   | y <sup>0</sup>     | y <sup>0++</sup>   | #  |
|----|--------------------|-------------------|----------------|--------------------|--------------------|-------------------|------|--------------------|--------------------|--------------------|--------------------|--------------------|--------------------|----|
| 1  | 164.070605         | 82.538940         |                |                    |                    |                   | Y    |                    |                    |                    |                    |                    |                    | 18 |
| 2  | <b>251.102633</b>  | 126.054954        |                |                    | 233.092068         | 117.049672        | S    | 2253.884545        | <b>1127.445910</b> | 2236.857996        | <b>1118.932636</b> | 2235.873980        | <b>1118.440628</b> | 17 |
| 3  | <b>366.129576</b>  | 183.568426        |                |                    | <b>348.119011</b>  | 174.563144        | D    | 2166.852517        | <b>1083.929896</b> | 2149.825968        | 1075.416622        | 2148.841952        | <b>1074.924614</b> | 16 |
| 4  | <b>437.166690</b>  | 219.086983        |                |                    | <b>419.156125</b>  | 210.081700        | A    | 2051.825574        | <b>1026.416425</b> | 2034.799025        | 1017.903150        | 2033.815009        | 1017.411142        | 15 |
| 5  | 524.198718         | 262.602997        |                |                    | 506.188153         | 253.597715        | S    | 1980.788460        | <b>990.897868</b>  | <b>1963.761911</b> | 982.384594         | 1962.777895        | 981.892586         | 14 |
| 6  | 639.225661         | 320.116469        |                |                    | 621.215096         | 311.111186        | D    | 1893.756432        | <b>947.381854</b>  | 1876.729883        | 938.868580         | 1875.745867        | 938.376572         | 13 |
| 7  | 799.256310         | 400.131793        |                |                    | 781.245745         | 391.126510        | C    | 1778.729489        | <b>889.868383</b>  | 1761.702940        | <b>881.355108</b>  | 1760.718924        | 880.863100         | 12 |
| 8  | 936.315222         | 468.661249        |                |                    | 918.304657         | 459.655966        | H    | <b>1618.698840</b> | 809.853058         | <b>1601.672291</b> | <b>801.339784</b>  | <b>1600.688275</b> | <b>800.847776</b>  | 11 |
| 9  | 993.336686         | 497.171981        |                |                    | 975.326121         | 488.166699        | G    | <b>1481.639928</b> | 741.323602         | 1464.613379        | 732.810328         | <b>1463.629363</b> | 732.318320         | 10 |
| 10 | 1122.379279        | 561.693278        |                |                    | 1104.368714        | 552.687995        | E    | <b>1424.618464</b> | 712.812870         | 1407.591915        | 704.299596         | 1406.607899        | 703.807588         | 9  |
| 11 | <b>1237.406222</b> | 619.206749        |                |                    | <b>1219.395657</b> | 610.201467        | D    | <b>1295.575871</b> | <b>648.291574</b>  | 1278.549322        | 639.778299         | 1277.565306        | 639.286291         | 8  |
| 12 | <b>1324.438250</b> | 662.722763        |                |                    | <b>1306.427685</b> | 653.717481        | S    | <b>1180.548928</b> | <b>590.778102</b>  | 1163.522379        | 582.264828         | 1162.538363        | 581.772820         | 7  |
| 13 | 1763.663576        | <b>882.335426</b> | 1746.637027    | 873.822152         | 1745.653011        | <b>873.330144</b> | Q    | 1093.516900        | <b>547.262088</b>  | 1076.490351        | 538.748814         | 1075.506335        | 538.256806         | 6  |
| 14 | 1834.700690        | <b>917.853983</b> | 1817.674141    | 909.340709         | 1816.690125        | 908.848701        | A    | <b>654.291574</b>  | 327.649425         | 637.265025         | 319.136151         | 636.281009         | 318.644143         | 5  |
| 15 | 1981.769104        | <b>991.388190</b> | 1964.742555    | 982.874916         | <b>1963.758539</b> | 982.382908        | F    | <b>583.254460</b>  | 292.130868         | 566.227911         | 283.617594         | 565.243895         | 283.125586         | 4  |
| 16 | 2141.799753        | 1071.403514       | 2124.773204    | 1062.890240        | 2123.789188        | 1062.398232       | C    | <b>436.186046</b>  | 218.596661         | <b>419.159497</b>  | 210.083386         | 418.175481         | 209.591378         | 3  |
| 17 | 2270.842346        | 1135.924811       | 2253.815797    | <b>1127.411536</b> | 2252.831781        | 1126.919528       | E    | <b>276.155397</b>  | 138.581337         | 259.128848         | 130.068062         | <b>258.144832</b>  | 129.576054         | 2  |
| 18 |                    |                   |                |                    |                    |                   | K    | <b>147.112804</b>  | 74.060040          | 130.086255         | 65.546765          |                    |                    | 1  |

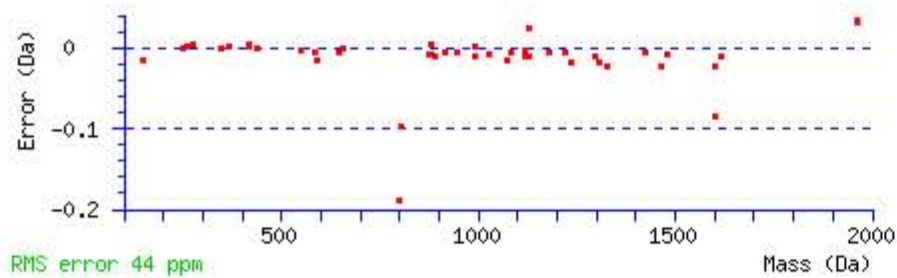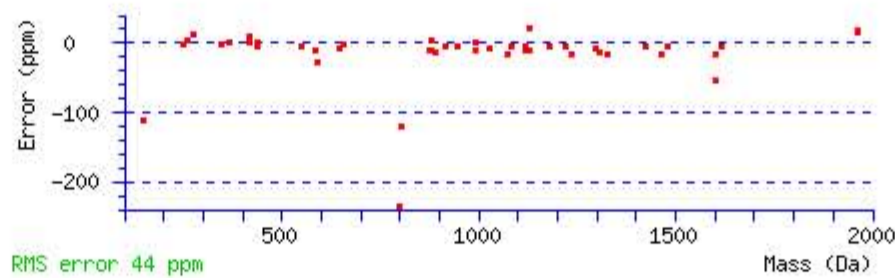

NCBI BLAST search of [YSDASDCHGEDSQAFCEK](#)

(Parameters: blastp, nr protein database, expect=20000, no filter, PAM30)

Other BLAST [web gateways](#)

All matches to this query

| Score | Mr(calc):   | Delta     | Sequence                           |
|-------|-------------|-----------|------------------------------------|
| 48.8  | 2415.940598 | -0.017306 | <a href="#">YSDASDCHGEDSQAFCEK</a> |

Mascot: <http://www.matrixscience.com/>

# Mascot Search Results

## Peptide View

MS/MS Fragmentation of **MCPQLQQYEMHGPEGLR**

Found in **A2MG\_HUMAN**, Alpha-2-macroglobulin OS=Homo sapiens GN=A2M PE=1 SV=3

Match to Query 50318: 2695.252842 from(899.424890,3+) rtinseconds(2228) index(33221)

Title: Locus:1.1.1.3439.25 File:"2013-07-02 CLN FXIII 180 min 3rd F 3.wiff"

Data file C:\Program Files (x86)\Matrix Science\Mascot Daemon\mgf\9 FXIII 180 min 3rd\mascot\_daemon\_merge.mgf

Click mouse within plot area to zoom in by factor of two about that point

Or, Plot from  to  Da

Label all possible matches  Label matches used for scoring

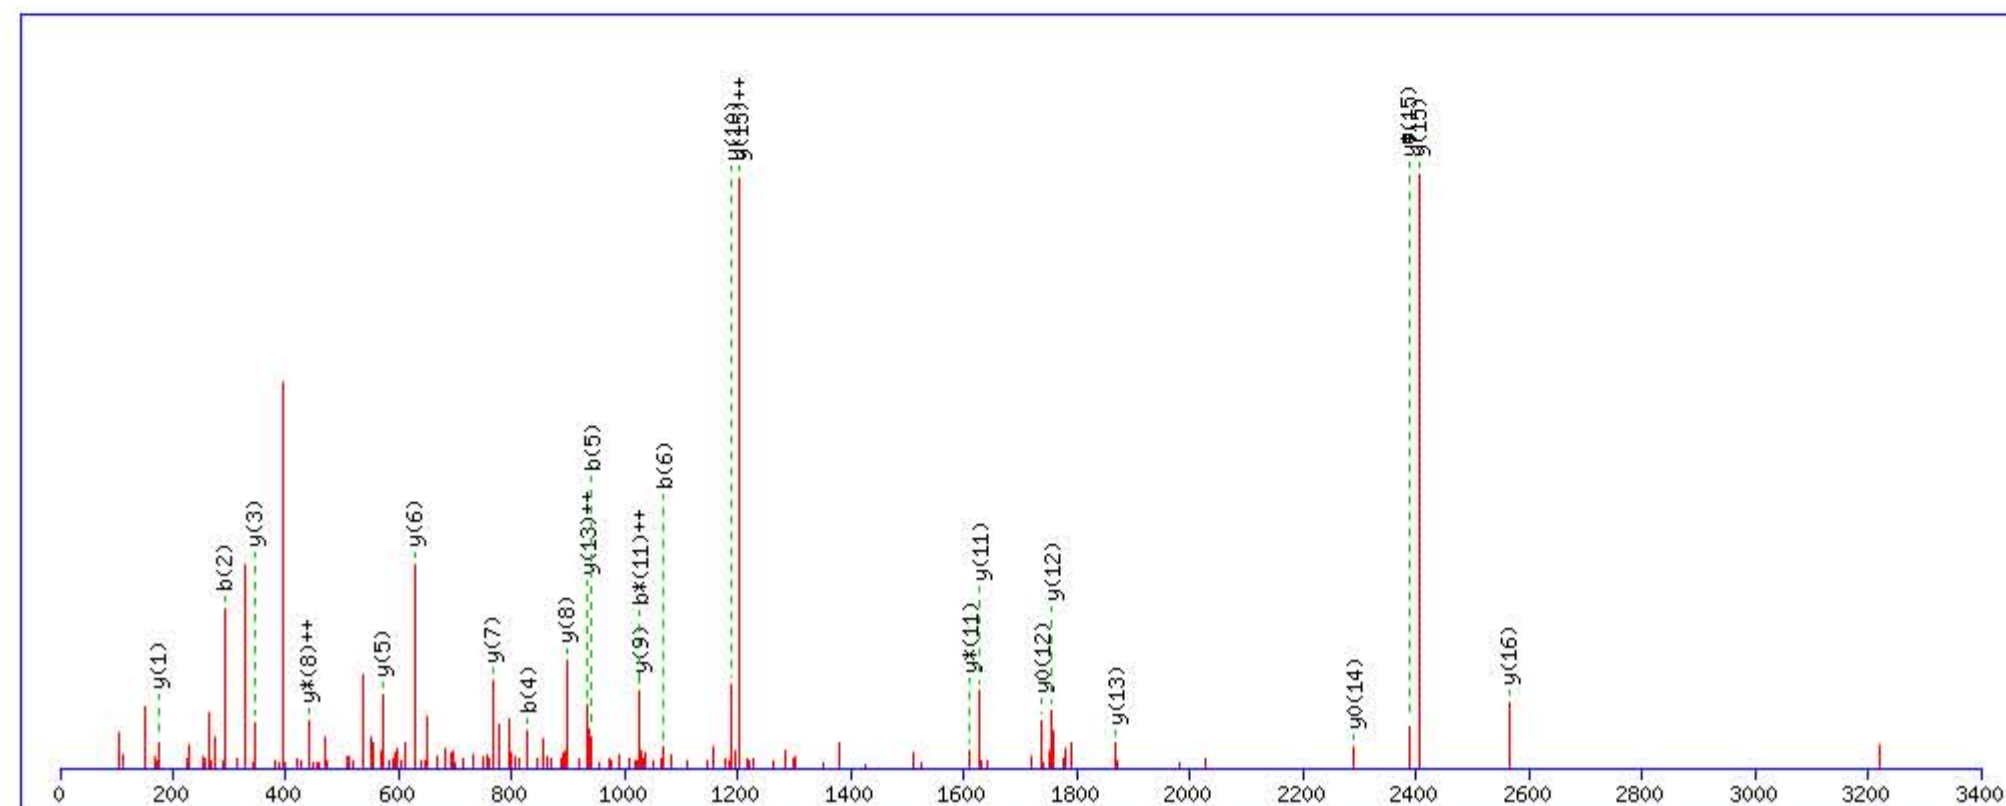

Monoisotopic mass of neutral peptide Mr(calc): 2695.256516

Fixed modifications: Carbamidomethyl (C) (apply to specified residues or termini only)

Variable modifications:

Q4 : Biotin:Thermo-21345 (Q)

Q7 : Biotin:Thermo-21345 (Q)

Ions Score: 61 Expect: 1.3e-005

Matches : 26/164 fragment ions using 59 most intense peaks [\(help\)](#)

| #  | b                  | b <sup>++</sup> | b <sup>+</sup> | b <sup>+++</sup>   | b <sup>0</sup> | b <sup>0++</sup> | Seq. | y                  | y <sup>++</sup>    | y <sup>+</sup>     | y <sup>+++</sup>  | y <sup>0</sup>     | y <sup>0++</sup> | #  |
|----|--------------------|-----------------|----------------|--------------------|----------------|------------------|------|--------------------|--------------------|--------------------|-------------------|--------------------|------------------|----|
| 1  | 132.047761         | 66.527518       |                |                    |                |                  | M    |                    |                    |                    |                   |                    |                  | 17 |
| 2  | <b>292.078410</b>  | 146.542843      |                |                    |                |                  | C    | <b>2565.223327</b> | 1283.115301        | 2548.196778        | 1274.602027       | 2547.212762        | 1274.110019      | 16 |
| 3  | 389.131174         | 195.069225      |                |                    |                |                  | P    | <b>2405.192678</b> | <b>1203.099977</b> | <b>2388.166129</b> | 1194.586702       | <b>2387.182113</b> | 1194.094694      | 15 |
| 4  | <b>828.356500</b>  | 414.681888      | 811.329951     | 406.168614         |                |                  | Q    | 2308.139914        | 1154.573595        | 2291.113365        | 1146.060320       | <b>2290.129349</b> | 1145.568312      | 14 |
| 5  | <b>941.440564</b>  | 471.223920      | 924.414015     | 462.710646         |                |                  | L    | <b>1868.914588</b> | <b>934.960932</b>  | 1851.888039        | 926.447658        | 1850.904023        | 925.955650       | 13 |
| 6  | <b>1069.499142</b> | 535.253209      | 1052.472593    | 526.739935         |                |                  | Q    | <b>1755.830524</b> | 878.418900         | 1738.803975        | 869.905626        | <b>1737.819959</b> | 869.413618       | 12 |
| 7  | 1508.724468        | 754.865872      | 1491.697919    | 746.352598         |                |                  | Q    | <b>1627.771946</b> | 814.389611         | <b>1610.745397</b> | 805.876337        | 1609.761381        | 805.384329       | 11 |
| 8  | 1671.787797        | 836.397537      | 1654.761248    | 827.884262         |                |                  | Y    | <b>1188.546620</b> | 594.776948         | 1171.520071        | 586.263674        | 1170.536055        | 585.771666       | 10 |
| 9  | 1800.830390        | 900.918833      | 1783.803841    | 892.405559         | 1782.819825    | 891.913551       | E    | <b>1025.483291</b> | 513.245284         | 1008.456742        | 504.732009        | 1007.472726        | 504.240001       | 9  |
| 10 | 1931.870875        | 966.439076      | 1914.844326    | 957.925801         | 1913.860310    | 957.433793       | M    | <b>896.440698</b>  | 448.723987         | 879.414149         | <b>440.210713</b> | 878.430133         | 439.718705       | 8  |
| 11 | 2068.929787        | 1034.968531     | 2051.903238    | <b>1026.455257</b> | 2050.919222    | 1025.963249      | H    | <b>765.400213</b>  | 383.203745         | 748.373664         | 374.690470        | 747.389648         | 374.198462       | 7  |
| 12 | 2125.951251        | 1063.479263     | 2108.924702    | 1054.965989        | 2107.940686    | 1054.473981      | G    | <b>628.341301</b>  | 314.674289         | 611.314752         | 306.161014        | 610.330736         | 305.669006       | 6  |
| 13 | 2223.004015        | 1112.005645     | 2205.977466    | 1103.492371        | 2204.993450    | 1103.000363      | P    | <b>571.319837</b>  | 286.163557         | 554.293288         | 277.650282        | 553.309272         | 277.158274       | 5  |
| 14 | 2352.046608        | 1176.526942     | 2335.020059    | 1168.013667        | 2334.036043    | 1167.521659      | E    | 474.267073         | 237.637175         | 457.240524         | 229.123900        | 456.256508         | 228.631892       | 4  |
| 15 | 2409.068072        | 1205.037674     | 2392.041523    | 1196.524399        | 2391.057507    | 1196.032391      | G    | <b>345.224480</b>  | 173.115878         | 328.197931         | 164.602603        |                    |                  | 3  |
| 16 | 2522.152136        | 1261.579706     | 2505.125587    | 1253.066431        | 2504.141571    | 1252.574424      | L    | 288.203016         | 144.605146         | 271.176467         | 136.091872        |                    |                  | 2  |
| 17 |                    |                 |                |                    |                |                  | R    | <b>175.118952</b>  | 88.063114          | 158.092403         | 79.549839         |                    |                  | 1  |

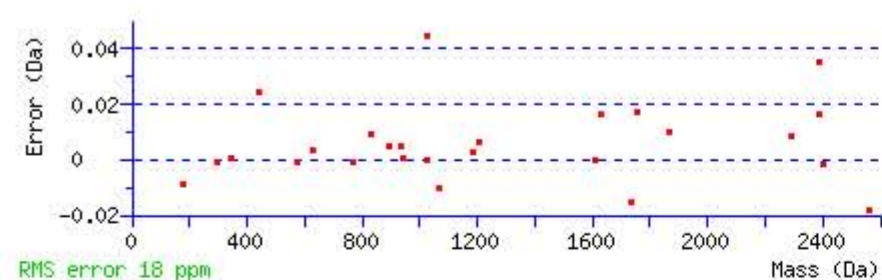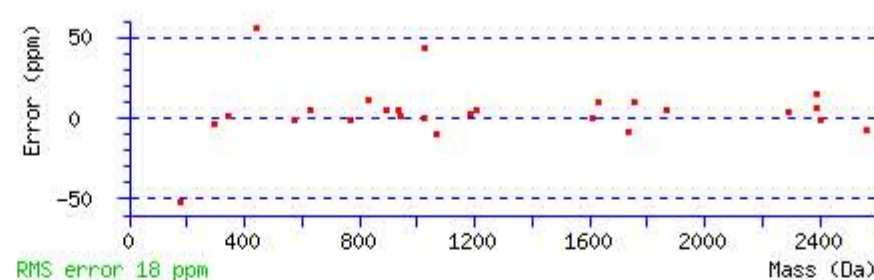

NCBI BLAST search of **MCPQLQQYEMHGPEGLR**

(Parameters: blastp, nr protein database, expect=20000, no filter, PAM30)

Other BLAST [web gateways](#)

All matches to this query

| Score | Mr(calc):   | Delta     | Sequence                          |
|-------|-------------|-----------|-----------------------------------|
| 60.5  | 2695.256516 | -0.003674 | <a href="#">MCPQLQQYEMHGPEGLR</a> |
| 50.8  | 2695.256516 | -0.003674 | <a href="#">MCPQLQQYEMHGPEGLR</a> |
| 34.9  | 2695.256516 | -0.003674 | <a href="#">MCPQLQQYEMHGPEGLR</a> |

Mascot: <http://www.matrixscience.com/>

# MASCOT Search Results

## Peptide View

MS/MS Fragmentation of **MCPQLQQYEMHGPEGLR**

Found in **A2MG\_HUMAN**, Alpha-2-macroglobulin OS=Homo sapiens GN=A2M PE=1 SV=3

Match to Query 50481: 2711.245496 from(678.818650,4+) rtinseconds(2143) index(32702)

Title: Locus:1.1.1.3410.7 File:"2013-07-02 CLN FXIII 180 min 3rd F 3.wiff"

Data file C:\Program Files (x86)\Matrix Science\Mascot Daemon\mgf9 FXIII 180 min 3rd\mascot\_daemon\_merge.mgf

Click mouse within plot area to zoom in by factor of two about that point

Or, Plot from  to  Da

Label all possible matches  Label matches used for scoring

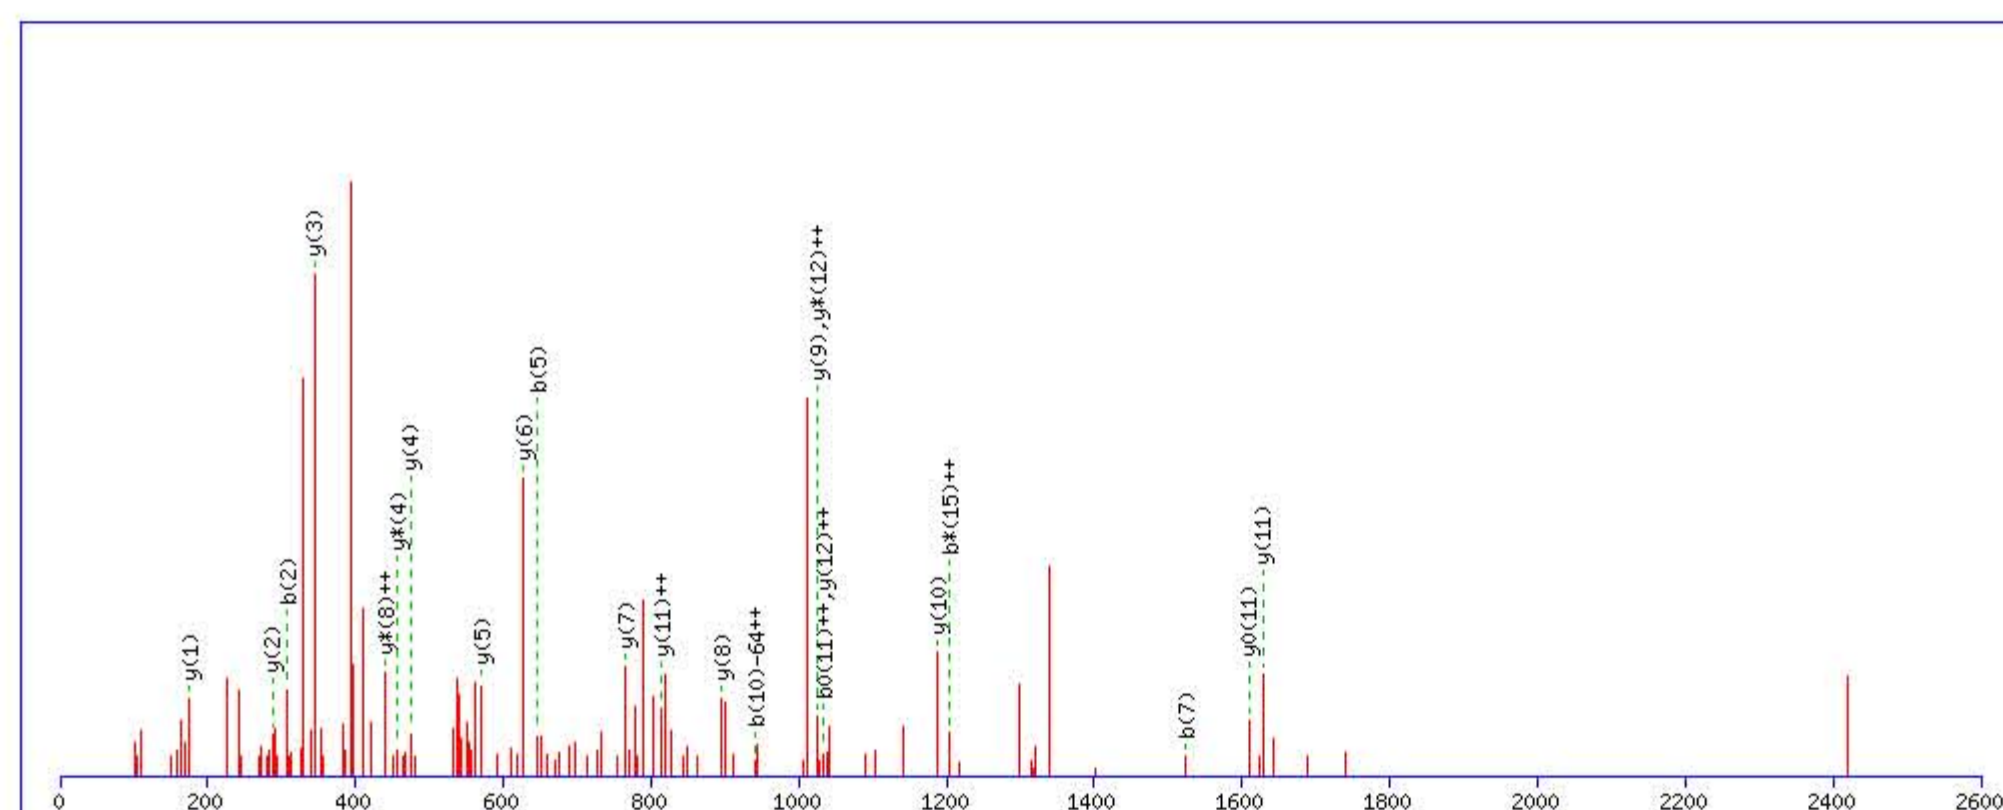

Monoisotopic mass of neutral peptide Mr(calc): 2711.251434

Fixed modifications: Carbamidomethyl (C) (apply to specified residues or termini only)

Variable modifications:

M1 : Oxidation (M), with neutral losses 0.000000 (shown in table), 63.998285

Q6 : Biotin:Thermo-21345 (Q)

Q7 : Biotin:Thermo-21345 (Q)

Ions Score: 32 Expect: 0.0095

Matches : 23/238 fragment ions using 70 most intense peaks [\(help\)](#)

| #  | b                  | b <sup>++</sup> | b <sup>+</sup> | b <sup>+++</sup>   | b <sup>0</sup> | b <sup>0++</sup>   | Seq. | y                  | y <sup>++</sup>    | y <sup>+</sup>    | y <sup>+++</sup>   | y <sup>0</sup>     | y <sup>0++</sup> | #  |
|----|--------------------|-----------------|----------------|--------------------|----------------|--------------------|------|--------------------|--------------------|-------------------|--------------------|--------------------|------------------|----|
| 1  | 148.042676         | 74.524976       |                |                    |                |                    | M    |                    |                    |                   |                    |                    |                  | 17 |
| 2  | <b>308.073325</b>  | 154.540301      |                |                    |                |                    | C    | 2565.223327        | 1283.115302        | 2548.196778       | 1274.602027        | 2547.212762        | 1274.110019      | 16 |
| 3  | 405.126089         | 203.066683      |                |                    |                |                    | P    | 2405.192678        | 1203.099977        | 2388.166129       | 1194.586702        | 2387.182113        | 1194.094694      | 15 |
| 4  | 533.184667         | 267.095972      | 516.158118     | 258.582697         |                |                    | Q    | 2308.139914        | 1154.573595        | 2291.113365       | 1146.060320        | 2290.129349        | 1145.568312      | 14 |
| 5  | <b>646.268731</b>  | 323.638004      | 629.242182     | 315.124729         |                |                    | L    | 2180.081336        | 1090.544306        | 2163.054787       | 1082.031031        | 2162.070771        | 1081.539023      | 13 |
| 6  | 1085.494057        | 543.250667      | 1068.467508    | 534.737392         |                |                    | Q    | 2066.997272        | <b>1034.002274</b> | 2049.970723       | <b>1025.488999</b> | 2048.986707        | 1024.996991      | 12 |
| 7  | <b>1524.719383</b> | 762.863330      | 1507.692834    | 754.350055         |                |                    | Q    | <b>1627.771946</b> | <b>814.389611</b>  | 1610.745397       | 805.876337         | <b>1609.761381</b> | 805.384329       | 11 |
| 8  | 1687.782712        | 844.394994      | 1670.756163    | 835.881720         |                |                    | Y    | <b>1188.546620</b> | 594.776948         | 1171.520071       | 586.263674         | 1170.536055        | 585.771666       | 10 |
| 9  | 1816.825305        | 908.916291      | 1799.798756    | 900.403016         | 1798.814740    | 899.911008         | E    | <b>1025.483291</b> | 513.245284         | 1008.456742       | 504.732009         | 1007.472726        | 504.240001       | 9  |
| 10 | 1947.865790        | 974.436533      | 1930.839241    | 965.923259         | 1929.855225    | 965.431251         | M    | <b>896.440698</b>  | 448.723987         | 879.414149        | <b>440.210713</b>  | 878.430133         | 439.718705       | 8  |
| 11 | 2084.924702        | 1042.965989     | 2067.898153    | 1034.452715        | 2066.914137    | <b>1033.960707</b> | H    | <b>765.400213</b>  | 383.203745         | 748.373664        | 374.690470         | 747.389648         | 374.198462       | 7  |
| 12 | 2141.946166        | 1071.476721     | 2124.919617    | 1062.963446        | 2123.935601    | 1062.471439        | G    | <b>628.341301</b>  | 314.674289         | 611.314752        | 306.161014         | 610.330736         | 305.669006       | 6  |
| 13 | 2238.998930        | 1120.003103     | 2221.972381    | 1111.489828        | 2220.988365    | 1110.997821        | P    | <b>571.319837</b>  | 286.163557         | 554.293288        | 277.650282         | 553.309272         | 277.158274       | 5  |
| 14 | 2368.041523        | 1184.524400     | 2351.014974    | 1176.011125        | 2350.030958    | 1175.519117        | E    | <b>474.267073</b>  | 237.637175         | <b>457.240524</b> | 229.123900         | 456.256508         | 228.631892       | 4  |
| 15 | 2425.062987        | 1213.035132     | 2408.036438    | <b>1204.521857</b> | 2407.052422    | 1204.029849        | G    | <b>345.224480</b>  | 173.115878         | 328.197931        | 164.602603         |                    |                  | 3  |
| 16 | 2538.147051        | 1269.577164     | 2521.120502    | 1261.063889        | 2520.136486    | 1260.571881        | L    | <b>288.203016</b>  | 144.605146         | 271.176467        | 136.091872         |                    |                  | 2  |
| 17 |                    |                 |                |                    |                |                    | R    | <b>175.118952</b>  | 88.063114          | 158.092403        | 79.549839          |                    |                  | 1  |

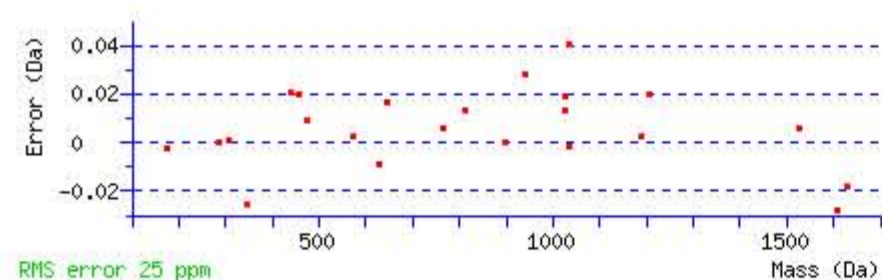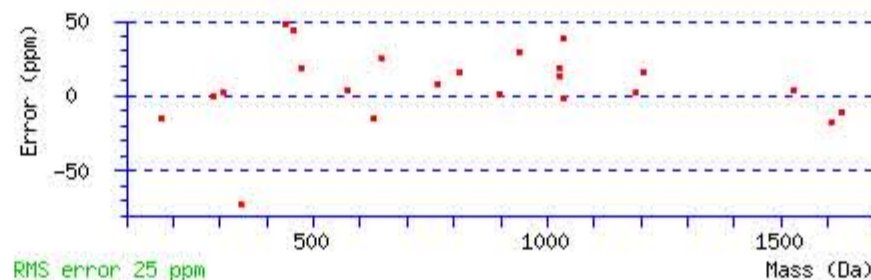

NCBI BLAST search of [MCPQLQQYEMHGPEGLR](#)

(Parameters: blastp, nr protein database, expect=20000, no filter, PAM30)

Other BLAST [web gateways](#)

### All matches to this query

| Score | Mr(calc):   | Delta     | Sequence                          |
|-------|-------------|-----------|-----------------------------------|
| 31.6  | 2711.251434 | -0.005938 | <a href="#">MCPQLQQYEMHGPEGLR</a> |
| 31.4  | 2711.251434 | -0.005938 | <a href="#">MCPQLQQYEMHGPEGLR</a> |
| 30.4  | 2711.251434 | -0.005938 | <a href="#">MCPQLQQYEMHGPEGLR</a> |
| 27.3  | 2711.251434 | -0.005938 | <a href="#">MCPQLQQYEMHGPEGLR</a> |
| 20.7  | 2711.251434 | -0.005938 | <a href="#">MCPQLQQYEMHGPEGLR</a> |
| 17.8  | 2711.251434 | -0.005938 | <a href="#">MCPQLQQYEMHGPEGLR</a> |

# MASCOT SEARCH RESULTS

## Peptide View

MS/MS Fragmentation of **MCPQLQQYEMHGPEGLR**

Found in **A2MG\_HUMAN**, Alpha-2-macroglobulin OS=Homo sapiens GN=A2M PE=1 SV=3

Match to Query 50512: 2711.273136 from(678.825560,4+) rtinseconds(2209) index(6031)

Title: Locus:1.1.1.3289.18 File:"2013-07-02 CLN FXIII 180 min 3rd F 1.wiff"

Data file C:\Program Files (x86)\Matrix Science\Mascot Daemon\mgf9 FXIII 180 min 3rd\mascot\_daemon\_merge.mgf

Click mouse within plot area to zoom in by factor of two about that point

Or, Plot from  to  Da

Label all possible matches  Label matches used for scoring

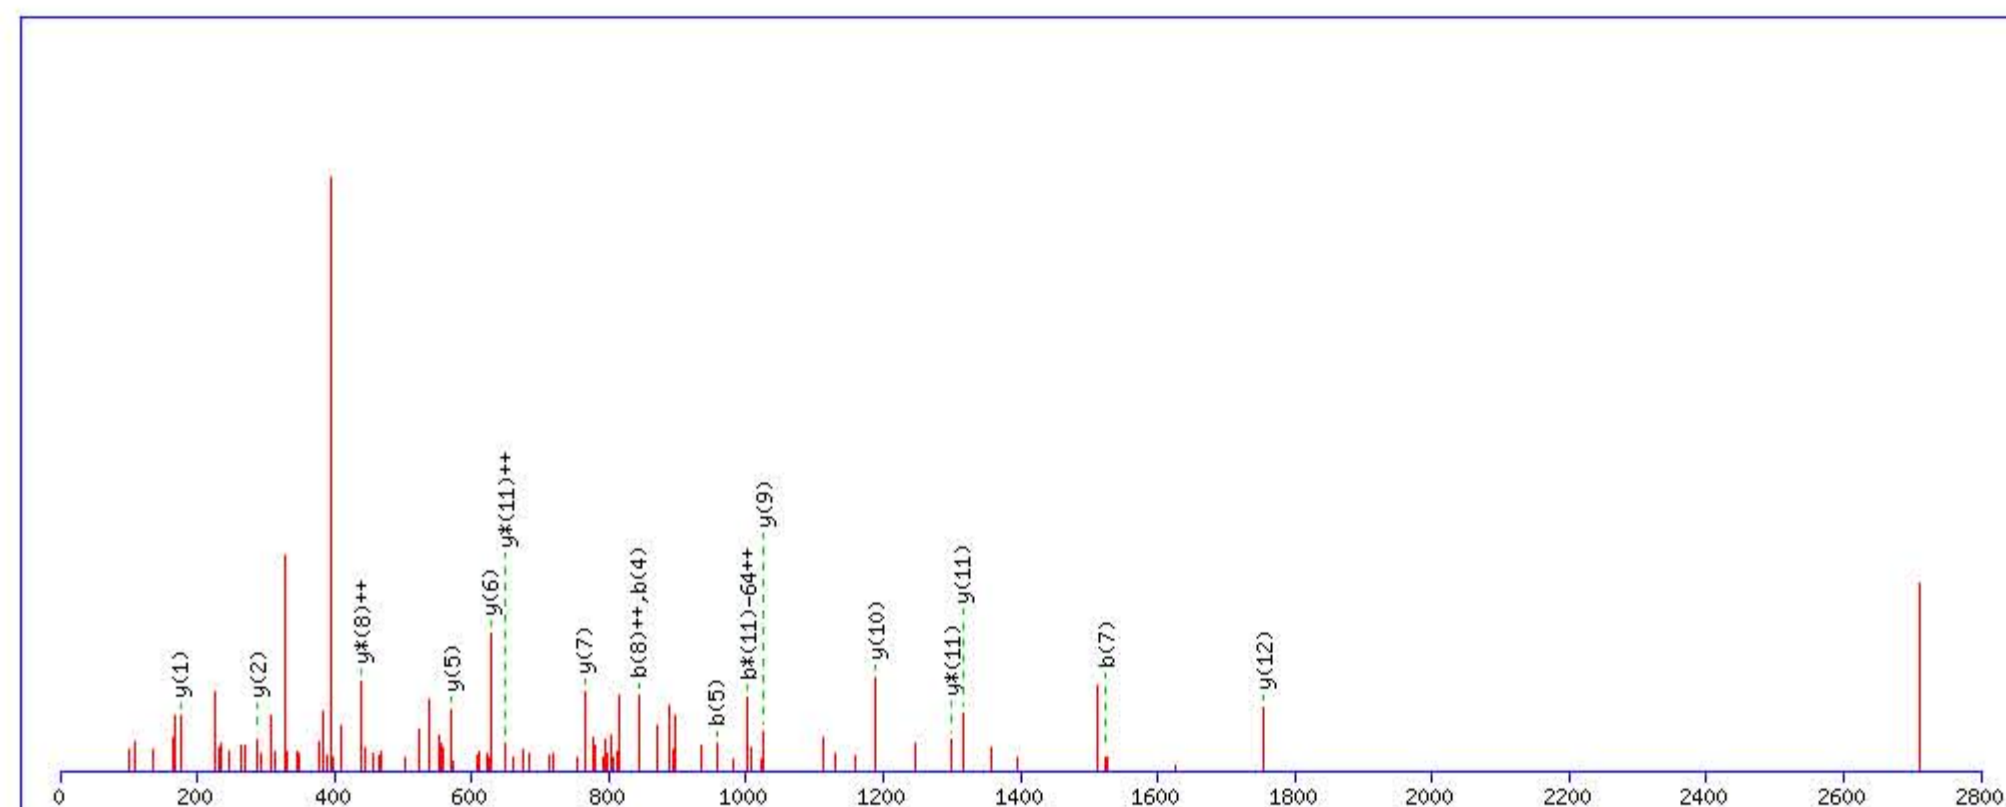

Monoisotopic mass of neutral peptide Mr(calc): 2711.251434

Fixed modifications: Carbamidomethyl (C) (apply to specified residues or termini only)

Variable modifications:

M1 : Oxidation (M), with neutral losses 0.000000 (shown in table), 63.998285

Q4 : Biotin:Thermo-21345 (Q)

Q6 : Biotin:Thermo-21345 (Q)

Ions Score: 40 Expect: 0.00017

Matches : 17/238 fragment ions using 30 most intense peaks [\(help\)](#)

| #  | b                  | b <sup>++</sup>   | b <sup>*</sup> | b <sup>*++</sup> | b <sup>0</sup> | b <sup>0++</sup> | Seq. | y                  | y <sup>++</sup> | y <sup>*</sup>     | y <sup>*++</sup>  | y <sup>0</sup> | y <sup>0++</sup> | #  |
|----|--------------------|-------------------|----------------|------------------|----------------|------------------|------|--------------------|-----------------|--------------------|-------------------|----------------|------------------|----|
| 1  | 148.042676         | 74.524976         |                |                  |                |                  | M    |                    |                 |                    |                   |                |                  | 17 |
| 2  | 308.073325         | 154.540301        |                |                  |                |                  | C    | 2565.223327        | 1283.115302     | 2548.196778        | 1274.602027       | 2547.212762    | 1274.110019      | 16 |
| 3  | 405.126089         | 203.066683        |                |                  |                |                  | P    | 2405.192678        | 1203.099977     | 2388.166129        | 1194.586702       | 2387.182113    | 1194.094694      | 15 |
| 4  | <b>844.351415</b>  | 422.679346        | 827.324866     | 414.166071       |                |                  | Q    | 2308.139914        | 1154.573595     | 2291.113365        | 1146.060320       | 2290.129349    | 1145.568312      | 14 |
| 5  | <b>957.435479</b>  | 479.221378        | 940.408930     | 470.708103       |                |                  | L    | 1868.914588        | 934.960932      | 1851.888039        | 926.447658        | 1850.904023    | 925.955650       | 13 |
| 6  | 1396.660805        | 698.834041        | 1379.634256    | 690.320766       |                |                  | Q    | <b>1755.830524</b> | 878.418900      | 1738.803975        | 869.905626        | 1737.819959    | 869.413618       | 12 |
| 7  | <b>1524.719383</b> | 762.863330        | 1507.692834    | 754.350055       |                |                  | Q    | <b>1316.605198</b> | 658.806237      | <b>1299.578649</b> | <b>650.292963</b> | 1298.594633    | 649.800955       | 11 |
| 8  | 1687.782712        | <b>844.394994</b> | 1670.756163    | 835.881720       |                |                  | Y    | <b>1188.546620</b> | 594.776948      | 1171.520071        | 586.263674        | 1170.536055    | 585.771666       | 10 |
| 9  | 1816.825305        | 908.916291        | 1799.798756    | 900.403016       | 1798.814740    | 899.911008       | E    | <b>1025.483291</b> | 513.245284      | 1008.456742        | 504.732009        | 1007.472726    | 504.240001       | 9  |
| 10 | 1947.865790        | 974.436533        | 1930.839241    | 965.923259       | 1929.855225    | 965.431251       | M    | 896.440698         | 448.723987      | 879.414149         | <b>440.210713</b> | 878.430133     | 439.718705       | 8  |
| 11 | 2084.924702        | 1042.965989       | 2067.898153    | 1034.452715      | 2066.914137    | 1033.960707      | H    | <b>765.400213</b>  | 383.203745      | 748.373664         | 374.690470        | 747.389648     | 374.198462       | 7  |
| 12 | 2141.946166        | 1071.476721       | 2124.919617    | 1062.963446      | 2123.935601    | 1062.471439      | G    | <b>628.341301</b>  | 314.674289      | 611.314752         | 306.161014        | 610.330736     | 305.669006       | 6  |
| 13 | 2238.998930        | 1120.003103       | 2221.972381    | 1111.489828      | 2220.988365    | 1110.997821      | P    | <b>571.319837</b>  | 286.163557      | 554.293288         | 277.650282        | 553.309272     | 277.158274       | 5  |
| 14 | 2368.041523        | 1184.524400       | 2351.014974    | 1176.011125      | 2350.030958    | 1175.519117      | E    | 474.267073         | 237.637175      | 457.240524         | 229.123900        | 456.256508     | 228.631892       | 4  |
| 15 | 2425.062987        | 1213.035132       | 2408.036438    | 1204.521857      | 2407.052422    | 1204.029849      | G    | 345.224480         | 173.115878      | 328.197931         | 164.602603        |                |                  | 3  |
| 16 | 2538.147051        | 1269.577164       | 2521.120502    | 1261.063889      | 2520.136486    | 1260.571881      | L    | <b>288.203016</b>  | 144.605146      | 271.176467         | 136.091872        |                |                  | 2  |
| 17 |                    |                   |                |                  |                |                  | R    | <b>175.118952</b>  | 88.063114       | 158.092403         | 79.549839         |                |                  | 1  |

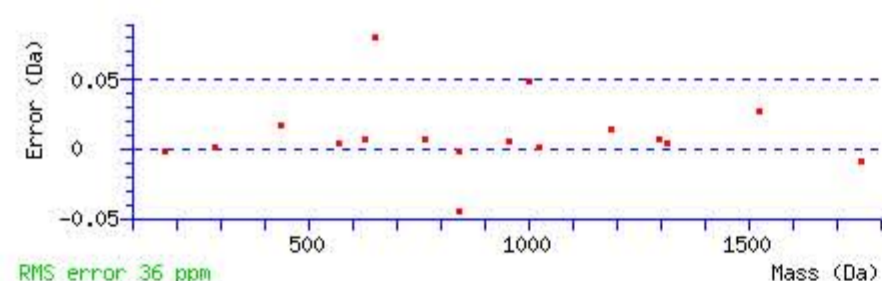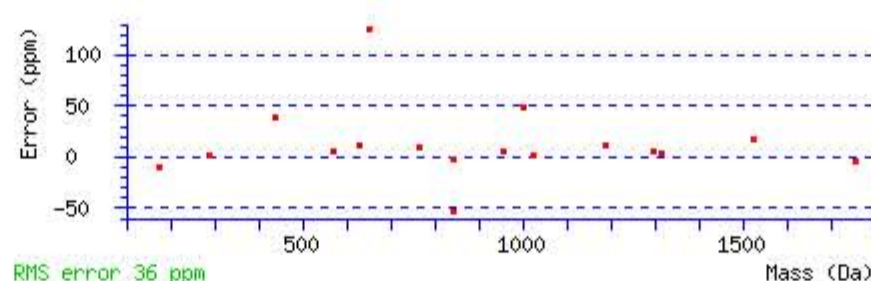

NCBI BLAST search of **MCPQLQQYEMHGPEGLR**

(Parameters: blastp, nr protein database, expect=20000, no filter, PAM30)

Other BLAST [web gateways](#)

All matches to this query

| Score | Mr(calc):   | Delta     | Sequence                          |
|-------|-------------|-----------|-----------------------------------|
| 40.4  | 2711.251434 | 0.021702  | <a href="#">MCPQLQQYEMHGPEGLR</a> |
| 27.4  | 2711.251434 | 0.021702  | <a href="#">MCPQLQQYEMHGPEGLR</a> |
| 15.2  | 2711.251434 | 0.021702  | <a href="#">MCPQLQQYEMHGPEGLR</a> |
| 0.1   | 2711.300659 | -0.027523 | <a href="#">GEDQSEQEKQERLETQR</a> |

Mascot: <http://www.matrixscience.com/>

# MASCOT Search Results

## Peptide View

MS/MS Fragmentation of **MCPQLQYEMHGPEGLR**

Found in **A2MG\_HUMAN**, Alpha-2-macroglobulin OS=Homo sapiens GN=A2M PE=1 SV=3

Match to Query 54074: 3006.423816 from(752.613230,4+) rtinseconds(2363) index(33885)

Title: Locus:1.1.1.3486.12 File:"2013-07-02 CLN FXIII 180 min 3rd F 3.wiff"

Data file C:\Program Files (x86)\Matrix Science\Mascot Daemon\mgf9 FXIII 180 min 3rd\mascot\_daemon\_merge.mgf

Click mouse within plot area to zoom in by factor of two about that point

Or, Plot from  to  Da

Label all possible matches  Label matches used for scoring

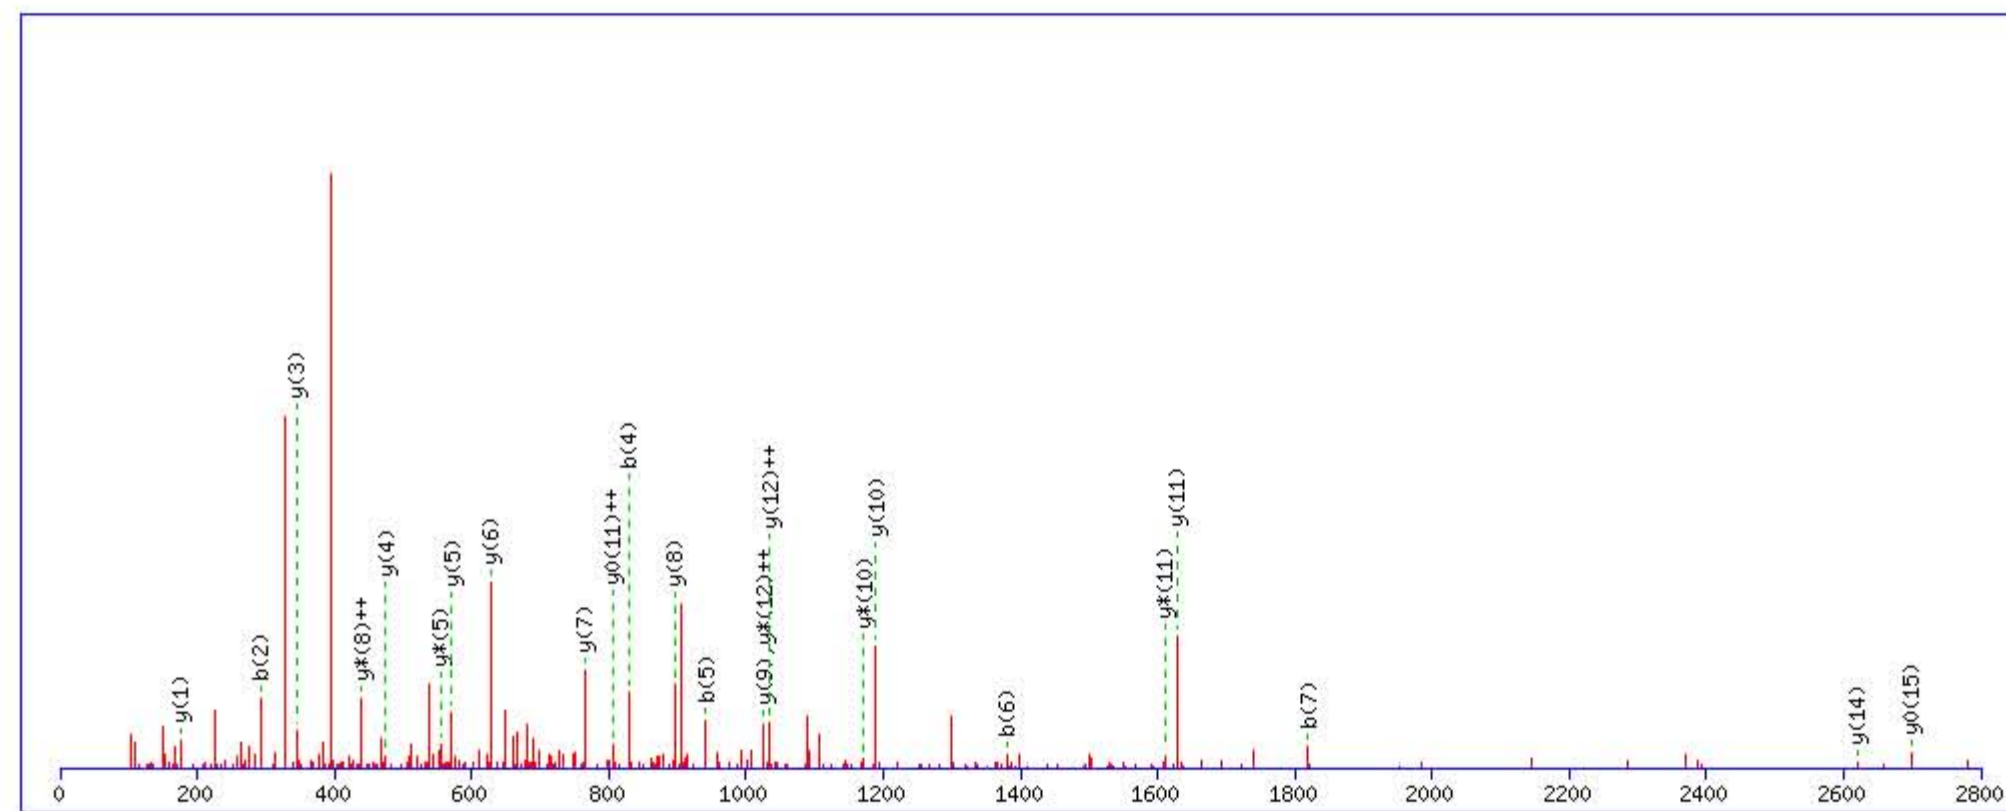

Monoisotopic mass of neutral peptide Mr(calc): 3006.423264

Fixed modifications: Carbamidomethyl (C) (apply to specified residues or termini only)

Variable modifications:

Q4 : Biotin:Thermo-21345 (Q)

Q6 : Biotin:Thermo-21345 (Q)

Q7 : Biotin:Thermo-21345 (Q)

Ions Score: 30 Expect: 0.02

Matches : 24/164 fragment ions using 66 most intense peaks [\(help\)](#)

| #  | b                  | b <sup>++</sup> | b <sup>*</sup> | b <sup>*++</sup> | b <sup>0</sup> | b <sup>0++</sup> | Seq. | y                  | y <sup>++</sup>    | y <sup>*</sup>     | y <sup>*++</sup>   | y <sup>0</sup>     | y <sup>0++</sup>  | #  |
|----|--------------------|-----------------|----------------|------------------|----------------|------------------|------|--------------------|--------------------|--------------------|--------------------|--------------------|-------------------|----|
| 1  | 132.047761         | 66.527518       |                |                  |                |                  | M    |                    |                    |                    |                    |                    |                   | 17 |
| 2  | <b>292.078410</b>  | 146.542843      |                |                  |                |                  | C    | 2876.390075        | 1438.698675        | 2859.363526        | 1430.185401        | 2858.379510        | 1429.693393       | 16 |
| 3  | 389.131174         | 195.069225      |                |                  |                |                  | P    | 2716.359426        | 1358.683351        | 2699.332877        | 1350.170076        | <b>2698.348861</b> | 1349.678068       | 15 |
| 4  | <b>828.356500</b>  | 414.681888      | 811.329951     | 406.168614       |                |                  | Q    | <b>2619.306662</b> | 1310.156969        | 2602.280113        | 1301.643694        | 2601.296097        | 1301.151686       | 14 |
| 5  | <b>941.440564</b>  | 471.223920      | 924.414015     | 462.710646       |                |                  | L    | 2180.081336        | 1090.544306        | 2163.054787        | 1082.031031        | 2162.070771        | 1081.539023       | 13 |
| 6  | <b>1380.665890</b> | 690.836583      | 1363.639341    | 682.323309       |                |                  | Q    | 2066.997272        | <b>1034.002274</b> | 2049.970723        | <b>1025.488999</b> | 2048.986707        | 1024.996991       | 12 |
| 7  | <b>1819.891216</b> | 910.449246      | 1802.864667    | 901.935972       |                |                  | Q    | <b>1627.771946</b> | 814.389611         | <b>1610.745397</b> | 805.876337         | 1609.761381        | <b>805.384329</b> | 11 |
| 8  | 1982.954545        | 991.980911      | 1965.927996    | 983.467636       |                |                  | Y    | <b>1188.546620</b> | 594.776948         | <b>1171.520071</b> | 586.263674         | 1170.536055        | 585.771666        | 10 |
| 9  | 2111.997138        | 1056.502207     | 2094.970589    | 1047.988932      | 2093.986573    | 1047.496925      | E    | <b>1025.483291</b> | 513.245284         | 1008.456742        | 504.732009         | 1007.472726        | 504.240001        | 9  |
| 10 | 2243.037623        | 1122.022450     | 2226.011074    | 1113.509175      | 2225.027058    | 1113.017167      | M    | <b>896.440698</b>  | 448.723987         | 879.414149         | <b>440.210713</b>  | 878.430133         | 439.718705        | 8  |
| 11 | 2380.096535        | 1190.551906     | 2363.069986    | 1182.038631      | 2362.085970    | 1181.546623      | H    | <b>765.400213</b>  | 383.203745         | 748.373664         | 374.690470         | 747.389648         | 374.198462        | 7  |
| 12 | 2437.117999        | 1219.062637     | 2420.091450    | 1210.549363      | 2419.107434    | 1210.057355      | G    | <b>628.341301</b>  | 314.674289         | 611.314752         | 306.161014         | 610.330736         | 305.669006        | 6  |
| 13 | 2534.170763        | 1267.589019     | 2517.144214    | 1259.075745      | 2516.160198    | 1258.583737      | P    | <b>571.319837</b>  | 286.163557         | <b>554.293288</b>  | 277.650282         | 553.309272         | 277.158274        | 5  |
| 14 | 2663.213356        | 1332.110316     | 2646.186807    | 1323.597041      | 2645.202791    | 1323.105034      | E    | <b>474.267073</b>  | 237.637175         | 457.240524         | 229.123900         | 456.256508         | 228.631892        | 4  |
| 15 | 2720.234820        | 1360.621048     | 2703.208271    | 1352.107773      | 2702.224255    | 1351.615766      | G    | <b>345.224480</b>  | 173.115878         | 328.197931         | 164.602603         |                    |                   | 3  |
| 16 | 2833.318884        | 1417.163080     | 2816.292335    | 1408.649806      | 2815.308319    | 1408.157798      | L    | 288.203016         | 144.605146         | 271.176467         | 136.091872         |                    |                   | 2  |
| 17 |                    |                 |                |                  |                |                  | R    | <b>175.118952</b>  | 88.063114          | 158.092403         | 79.549839          |                    |                   | 1  |

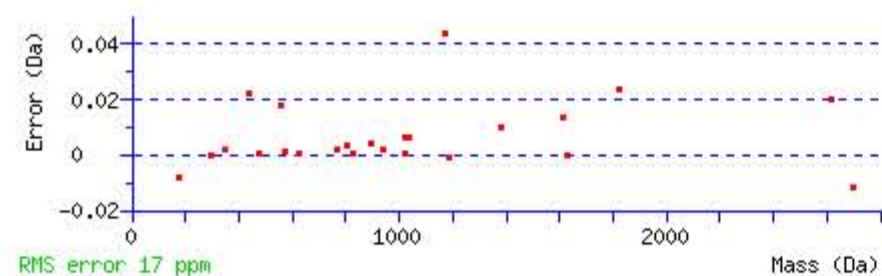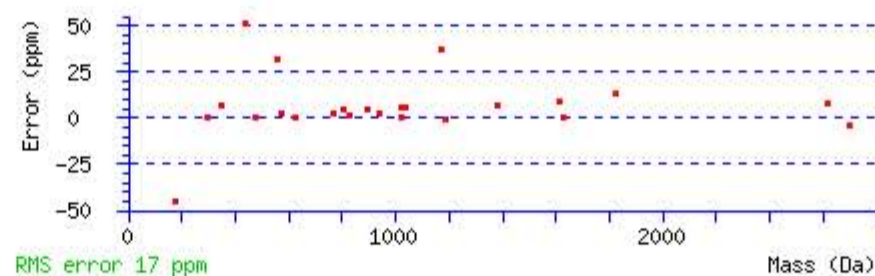

NCBI BLAST search of **MCPQLQYEMHGPEGLR**

(Parameters: blastp, nr protein database, expect=20000, no filter, PAM30)

Other BLAST [web gateways](#)

All matches to this query

| Score | Mr(calc):   | Delta    | Sequence                |
|-------|-------------|----------|-------------------------|
| 30.2  | 3006.423264 | 0.000552 | <b>MCPQLQYEMHGPEGLR</b> |

# MASCOT Search Results

## Peptide View

MS/MS Fragmentation of **AVDQSVLLMKPDAELSASSVYNLLPEK**  
 Found in **A2MG\_HUMAN**, Alpha-2-macroglobulin OS=Homo sapiens GN=A2M PE=1 SV=3

Match to Query 56579: 3227.682296 from(807.927850,4+) rtinseconds(2780) index(36508)  
 Title: Locus:1.1.1.3630.21 File:"2013-07-02 CLN FXIII 180 min 3rd F 3.wiff"  
 Data file C:\Program Files (x86)\Matrix Science\Mascot Daemon\mgf9 FXIII 180 min 3rd\mascot\_daemon\_merge.mgf

Click mouse within plot area to zoom in by factor of two about that point  
 Or, Plot from  to  Da   
 Label all possible matches  Label matches used for scoring

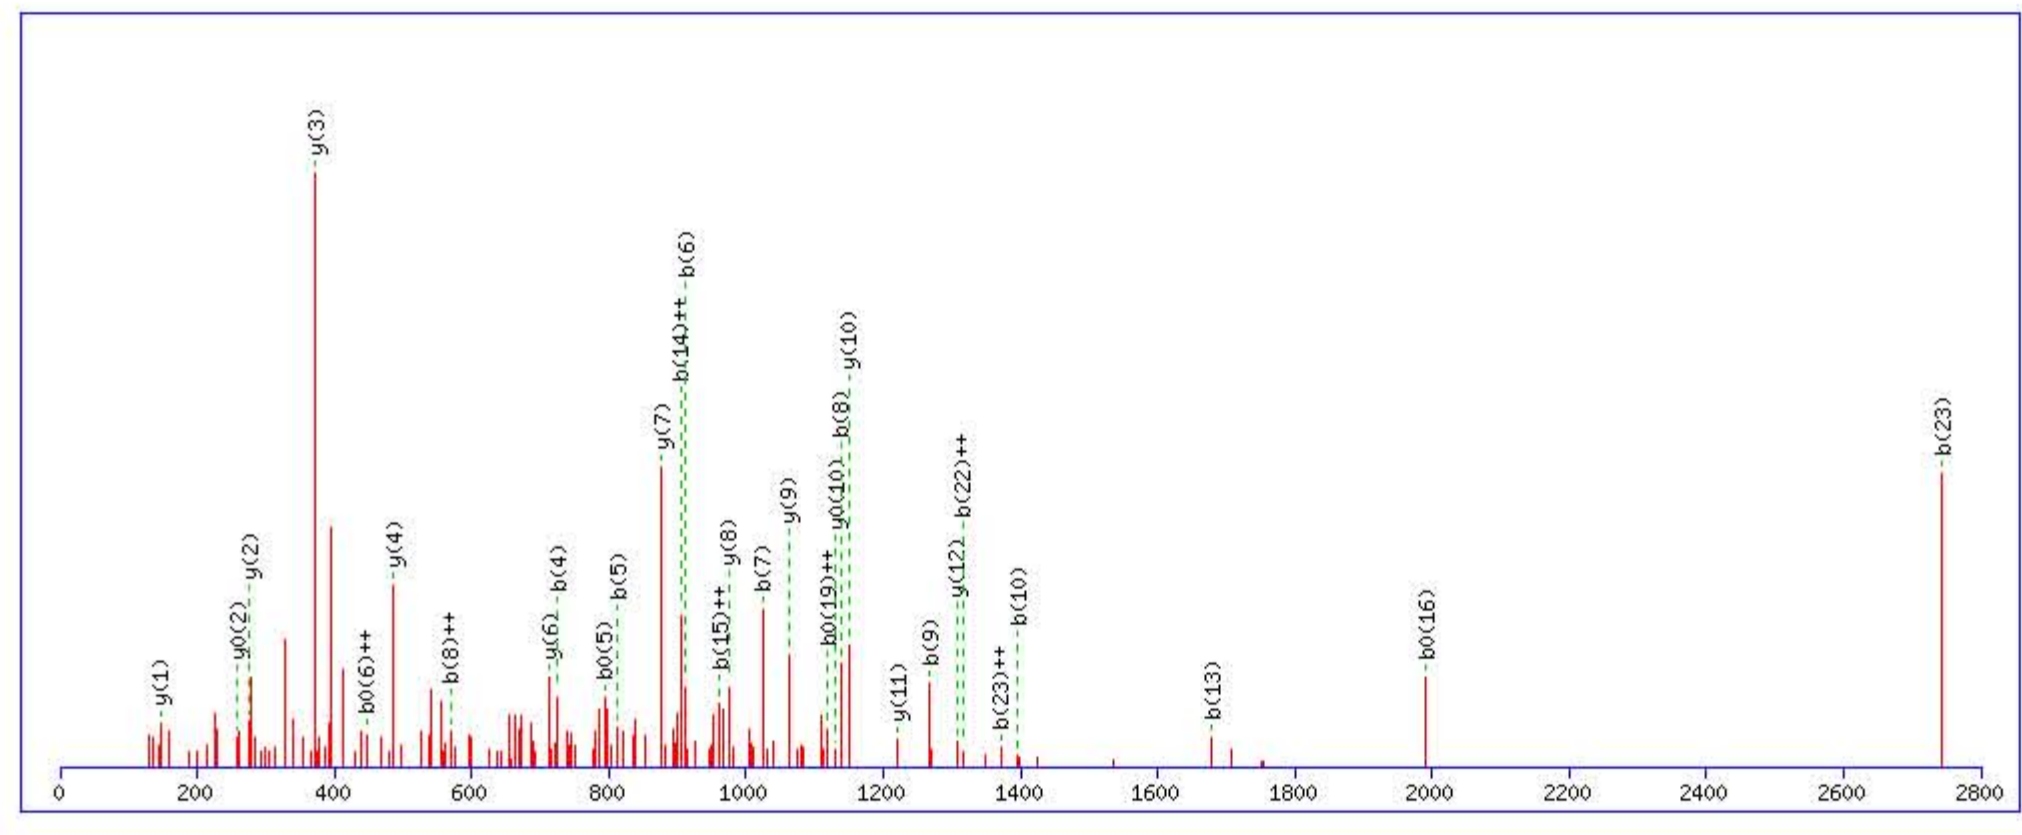

Monoisotopic mass of neutral peptide Mr(calc): 3227.682129  
 Fixed modifications: Carbamidomethyl (C) (apply to specified residues or termini only)  
 Variable modifications:  
 Q4 : Biotin:Thermo-21345 (Q)  
 Ions Score: 70 Expect: 3.5e-007  
 Matches : 31/300 fragment ions using 59 most intense peaks [\(help\)](#)

| #  | b                  | b <sup>++</sup>    | b <sup>*</sup> | b <sup>+++</sup> | b <sup>0</sup>     | b <sup>0++</sup>   | Seq. | y                  | y <sup>++</sup> | y <sup>*</sup> | y <sup>+++</sup> | y <sup>0</sup>     | y <sup>0++</sup> | #  |
|----|--------------------|--------------------|----------------|------------------|--------------------|--------------------|------|--------------------|-----------------|----------------|------------------|--------------------|------------------|----|
| 1  | 72.044390          | 36.525833          |                |                  |                    |                    | A    |                    |                 |                |                  |                    |                  | 27 |
| 2  | 171.112804         | 86.060040          |                |                  |                    |                    | V    | 3157.652336        | 1579.329806     | 3140.625787    | 1570.816531      | 3139.641771        | 1570.324523      | 26 |
| 3  | 286.139747         | 143.573512         |                |                  | 268.129182         | 134.568229         | D    | 3058.583922        | 1529.795599     | 3041.557373    | 1521.282324      | 3040.573357        | 1520.790316      | 25 |
| 4  | <b>725.365073</b>  | 363.186175         | 708.338524     | 354.672900       | 707.354508         | 354.180892         | Q    | 2943.556979        | 1472.282127     | 2926.530430    | 1463.768853      | 2925.546414        | 1463.276845      | 24 |
| 5  | <b>812.397101</b>  | 406.702189         | 795.370552     | 398.188914       | <b>794.386536</b>  | 397.696906         | S    | 2504.331653        | 1252.669464     | 2487.305104    | 1244.156190      | 2486.321088        | 1243.664182      | 23 |
| 6  | <b>911.465515</b>  | 456.236396         | 894.438966     | 447.723121       | 893.454950         | <b>447.231113</b>  | V    | 2417.299625        | 1209.153451     | 2400.273076    | 1200.640176      | 2399.289060        | 1200.148168      | 22 |
| 7  | <b>1024.549579</b> | 512.778427         | 1007.523030    | 504.265153       | 1006.539014        | 503.773145         | L    | 2318.231211        | 1159.619243     | 2301.204662    | 1151.105969      | 2300.220646        | 1150.613961      | 21 |
| 8  | <b>1137.633643</b> | <b>569.320459</b>  | 1120.607094    | 560.807185       | 1119.623078        | 560.315177         | L    | 2205.147147        | 1103.077212     | 2188.120598    | 1094.563937      | 2187.136582        | 1094.071929      | 20 |
| 9  | <b>1268.674128</b> | 634.840702         | 1251.647579    | 626.327428       | 1250.663563        | 625.835419         | M    | 2092.063083        | 1046.535179     | 2075.036534    | 1038.021905      | 2074.052518        | 1037.529897      | 19 |
| 10 | <b>1396.769091</b> | 698.888183         | 1379.742542    | 690.374909       | 1378.758526        | 689.882901         | K    | 1961.022598        | 981.014937      | 1943.996049    | 972.501663       | 1943.012033        | 972.009655       | 18 |
| 11 | 1493.821855        | 747.414565         | 1476.795306    | 738.901291       | 1475.811290        | 738.409283         | P    | 1832.927635        | 916.967456      | 1815.901086    | 908.454181       | 1814.917070        | 907.962173       | 17 |
| 12 | 1608.848798        | 804.928037         | 1591.822249    | 796.414763       | 1590.838233        | 795.922755         | D    | 1735.874871        | 868.441074      | 1718.848322    | 859.927799       | 1717.864306        | 859.435791       | 16 |
| 13 | <b>1679.885912</b> | 840.446594         | 1662.859363    | 831.933320       | 1661.875347        | 831.441311         | A    | 1620.847928        | 810.927602      | 1603.821379    | 802.414328       | 1602.837363        | 801.922320       | 15 |
| 14 | 1808.928505        | <b>904.967891</b>  | 1791.901956    | 896.454616       | 1790.917940        | 895.962608         | E    | 1549.810814        | 775.409045      | 1532.784265    | 766.895771       | 1531.800249        | 766.403763       | 14 |
| 15 | 1922.012569        | <b>961.509923</b>  | 1904.986020    | 952.996648       | 1904.002004        | 952.504640         | L    | 1420.768221        | 710.887749      | 1403.741672    | 702.374474       | 1402.757656        | 701.882466       | 13 |
| 16 | 2009.044597        | 1005.025937        | 1992.018048    | 996.512662       | <b>1991.034032</b> | 996.020654         | S    | <b>1307.684157</b> | 654.345717      | 1290.657608    | 645.832442       | 1289.673592        | 645.340434       | 12 |
| 17 | 2080.081711        | 1040.544493        | 2063.055162    | 1032.031219      | 2062.071146        | 1031.539211        | A    | <b>1220.652129</b> | 610.829703      | 1203.625580    | 602.316428       | 1202.641564        | 601.824420       | 11 |
| 18 | 2167.113739        | 1084.060507        | 2150.087190    | 1075.547233      | 2149.103174        | 1075.055225        | S    | <b>1149.615015</b> | 575.311146      | 1132.588466    | 566.797871       | <b>1131.604450</b> | 566.305863       | 10 |
| 19 | 2254.145767        | 1127.576521        | 2237.119218    | 1119.063247      | 2236.135202        | <b>1118.571239</b> | S    | <b>1062.582987</b> | 531.795132      | 1045.556438    | 523.281857       | 1044.572422        | 522.789849       | 9  |
| 20 | 2353.214181        | 1177.110728        | 2336.187632    | 1168.597454      | 2335.203616        | 1168.105446        | V    | <b>975.550959</b>  | 488.279118      | 958.524410     | 479.765843       | 957.540394         | 479.273835       | 8  |
| 21 | 2516.277510        | 1258.642393        | 2499.250961    | 1250.129118      | 2498.266945        | 1249.637110        | Y    | <b>876.482545</b>  | 438.744911      | 859.455996     | 430.231636       | 858.471980         | 429.739628       | 7  |
| 22 | 2630.320437        | <b>1315.663856</b> | 2613.293888    | 1307.150582      | 2612.309872        | 1306.658574        | N    | <b>713.419216</b>  | 357.213246      | 696.392667     | 348.699972       | 695.408651         | 348.207964       | 6  |
| 23 | <b>2743.404501</b> | <b>1372.205888</b> | 2726.377952    | 1363.692614      | 2725.393936        | 1363.200606        | L    | 599.376289         | 300.191783      | 582.349740     | 291.678508       | 581.365724         | 291.186500       | 5  |
| 24 | 2856.488565        | 1428.747921        | 2839.462016    | 1420.234646      | 2838.478000        | 1419.742638        | L    | <b>486.292225</b>  | 243.649751      | 469.265676     | 235.136476       | 468.281660         | 234.644468       | 4  |
| 25 | 2953.541329        | 1477.274303        | 2936.514780    | 1468.761028      | 2935.530764        | 1468.269020        | P    | <b>373.208161</b>  | 187.107719      | 356.181612     | 178.594444       | 355.197596         | 178.102436       | 3  |
| 26 | 3082.583922        | 1541.795599        | 3065.557373    | 1533.282325      | 3064.573357        | 1532.790317        | E    | <b>276.155397</b>  | 138.581337      | 259.128848     | 130.068062       | <b>258.144832</b>  | 129.576054       | 2  |
| 27 |                    |                    |                |                  |                    |                    | K    | <b>147.112804</b>  | 74.060040       | 130.086255     | 65.546765        |                    |                  | 1  |

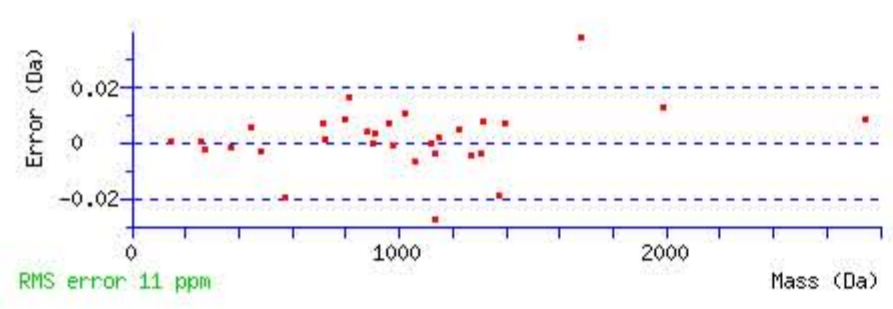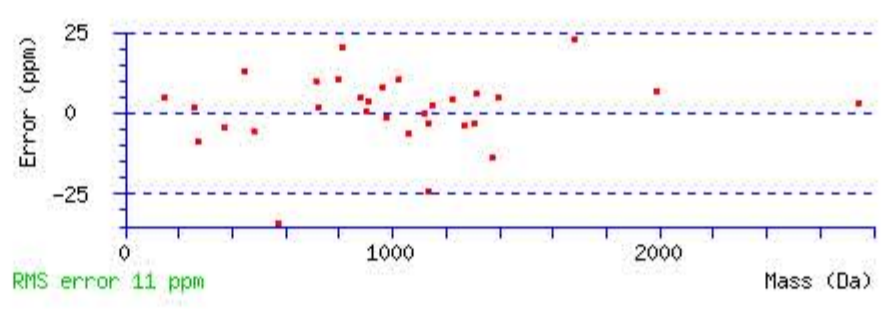

NCBI BLAST search of **AVDQSVLLMKPDAELSASSVYNLLPEK**  
 (Parameters: blastp, nr protein database, expect=20000, no filter, PAM30)  
 Other BLAST [web gateways](#)

### All matches to this query

| Score | Mr(calc):   | Delta    | Sequence                                       |
|-------|-------------|----------|------------------------------------------------|
| 70.4  | 3227.682129 | 0.000167 | <a href="#">AVDQSVLLMKPDAELSASSVYNLLPEK</a>    |
| 1.5   | 3227.668900 | 0.013396 | <a href="#">SQGRGKYDFYIQLGLAMSSSIFIGGSFILK</a> |
| 0.0   | 3227.669128 | 0.013168 | <a href="#">QDSSPHLTSQRPVDMVQLLK</a>           |

# MASCOT SEARCH RESULTS

## Peptide View

MS/MS Fragmentation of **KATEDEGSEQK**

Found in **ANT3\_HUMAN**, Antithrombin-III OS=Homo sapiens GN=SERPINC1 PE=1 SV=1

Match to Query 28106: 1531.716432 from(511.579420,3+) rtinseconds(1096) index(14060)

Title: Locus:1.1.1.2945.3 File:"2013-07-02 CLN FXIII 180 min 3rd F 2.wiff"

Data file C:\Program Files (x86)\Matrix Science\Mascot Daemon\mgf\9 FXIII 180 min 3rd\mascot\_daemon\_merge.mgf

Click mouse within plot area to zoom in by factor of two about that point

Or, Plot from  to  Da

Label all possible matches  Label matches used for scoring

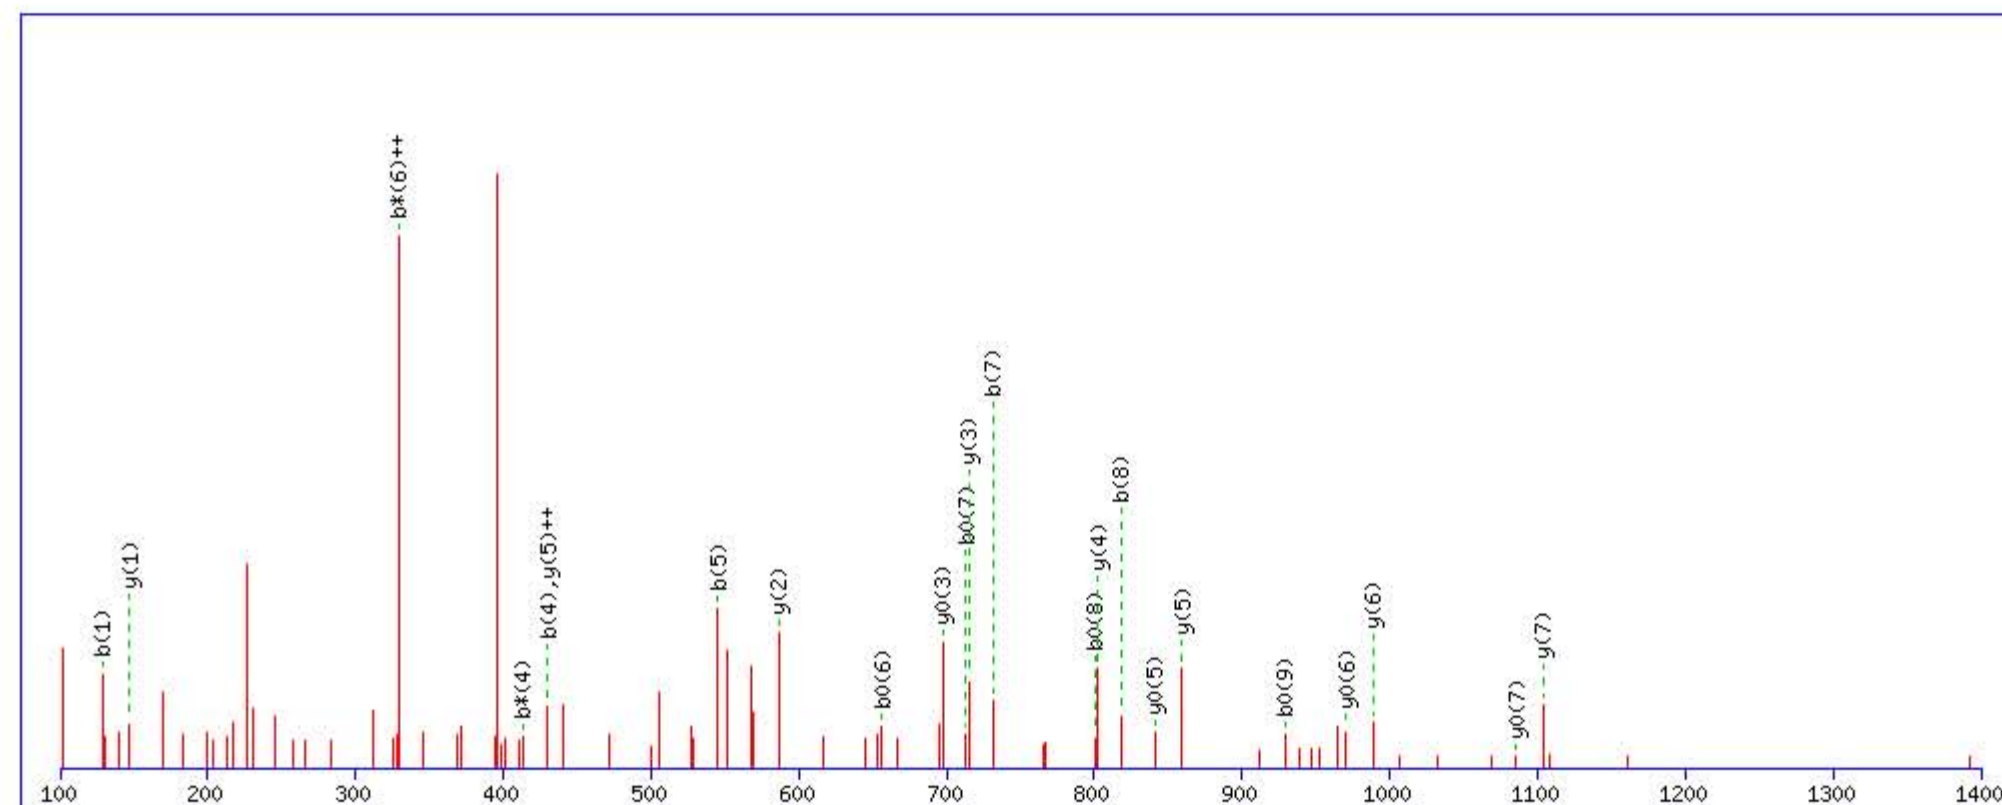

Monoisotopic mass of neutral peptide Mr(calc): 1531.718796

Fixed modifications: Carbamidomethyl (C) (apply to specified residues or termini only)

Variable modifications:

Q10 : Biotin:Thermo-21345 (Q)

Ions Score: 32 Expect: 0.0022

Matches : 23/112 fragment ions using 44 most intense peaks ([help](#))

| #  | b                 | b <sup>++</sup> | b <sup>*</sup>    | b <sup>*++</sup>  | b <sup>0</sup>    | b <sup>0++</sup> | Seq.     | y                  | y <sup>++</sup>   | y <sup>*</sup> | y <sup>*++</sup> | y <sup>0</sup>     | y <sup>0++</sup> | #         |
|----|-------------------|-----------------|-------------------|-------------------|-------------------|------------------|----------|--------------------|-------------------|----------------|------------------|--------------------|------------------|-----------|
| 1  | <b>129.102239</b> | 65.054757       | 112.075690        | 56.541483         |                   |                  | <b>K</b> |                    |                   |                |                  |                    |                  | <b>11</b> |
| 2  | 200.139353        | 100.573315      | 183.112804        | 92.060040         |                   |                  | <b>A</b> | 1404.631137        | 702.819207        | 1387.604588    | 694.305932       | 1386.620572        | 693.813924       | <b>10</b> |
| 3  | 301.187032        | 151.097154      | 284.160483        | 142.583879        | 283.176467        | 142.091872       | <b>T</b> | 1333.594023        | 667.300650        | 1316.567474    | 658.787375       | 1315.583458        | 658.295367       | <b>9</b>  |
| 4  | <b>430.229625</b> | 215.618450      | <b>413.203076</b> | 207.105176        | 412.219060        | 206.613168       | <b>E</b> | 1232.546344        | 616.776810        | 1215.519795    | 608.263536       | 1214.535779        | 607.771528       | <b>8</b>  |
| 5  | <b>545.256568</b> | 273.131922      | 528.230019        | 264.618648        | 527.246003        | 264.126640       | <b>D</b> | <b>1103.503751</b> | 552.255514        | 1086.477202    | 543.742239       | <b>1085.493186</b> | 543.250231       | <b>7</b>  |
| 6  | 674.299161        | 337.653219      | 657.272612        | <b>329.139944</b> | <b>656.288596</b> | 328.647936       | <b>E</b> | <b>988.476808</b>  | 494.742042        | 971.450259     | 486.228768       | <b>970.466243</b>  | 485.736760       | <b>6</b>  |
| 7  | <b>731.320625</b> | 366.163951      | 714.294076        | 357.650676        | <b>713.310060</b> | 357.158668       | <b>G</b> | <b>859.434215</b>  | <b>430.220746</b> | 842.407666     | 421.707471       | <b>841.423650</b>  | 421.215463       | <b>5</b>  |
| 8  | <b>818.352653</b> | 409.679965      | 801.326104        | 401.166690        | <b>800.342088</b> | 400.674682       | <b>S</b> | <b>802.412751</b>  | 401.710014        | 785.386202     | 393.196739       | 784.402186         | 392.704731       | <b>4</b>  |
| 9  | 947.395246        | 474.201261      | 930.368697        | 465.687987        | <b>929.384681</b> | 465.195979       | <b>E</b> | <b>715.380723</b>  | 358.194000        | 698.354174     | 349.680725       | <b>697.370158</b>  | 349.188717       | <b>3</b>  |
| 10 | 1386.620572       | 693.813924      | 1369.594023       | 685.300650        | 1368.610007       | 684.808642       | <b>Q</b> | <b>586.338130</b>  | 293.672703        | 569.311581     | 285.159429       |                    |                  | <b>2</b>  |
| 11 |                   |                 |                   |                   |                   |                  | <b>K</b> | <b>147.112804</b>  | 74.060040         | 130.086255     | 65.546765        |                    |                  | <b>1</b>  |

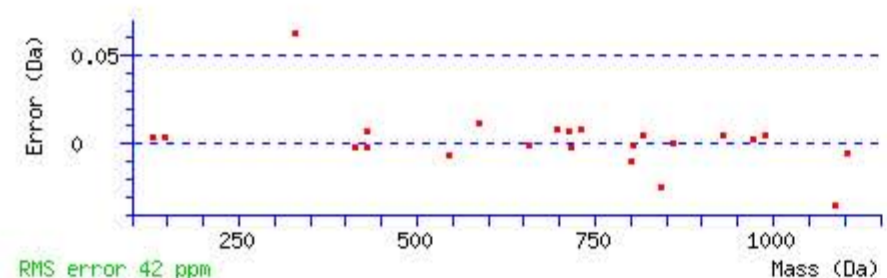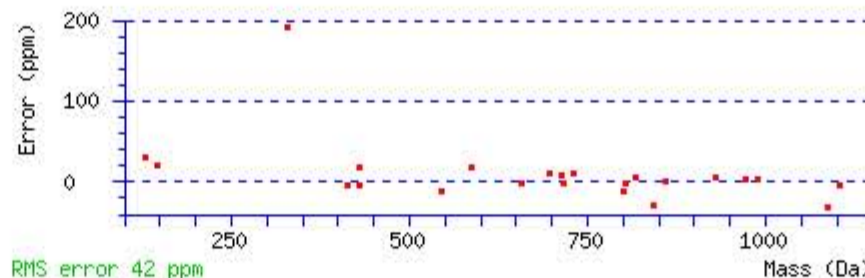

NCBI BLAST search of [KATEDEGSEQK](#)

(Parameters: blastp, nr protein database, expect=20000, no filter, PAM30)

Other BLAST [web gateways](#)

## All matches to this query

| Score | Mr(calc):   | Delta     | Sequence                       |
|-------|-------------|-----------|--------------------------------|
| 32.0  | 1531.718796 | -0.002364 | <a href="#">KATEDEGSEQK</a>    |
| 3.6   | 1531.715454 | 0.000978  | <a href="#">EWNGVVSESDSPVK</a> |
| 2.5   | 1531.716309 | 0.000123  | <a href="#">QVDSMWAEQK</a>     |



# MASCOT SCIENCE Mascot Search Results

## Peptide View

MS/MS Fragmentation of **TSDQIHFFFAK**

Found in **ANT3\_HUMAN**, Antithrombin-III OS=Homo sapiens GN=SERPINC1 PE=1 SV=1

Match to Query 32717: 1650.828132 from(551.283320,3+) rtinseconds(2352) index(20990)

Title: Locus:1.1.1.3385.4 File:"2013-07-02 CLN FXIII 180 min 3rd F 2.wiff"

Data file C:\Program Files (x86)\Matrix Science\Mascot Daemon\mgf\9 FXIII 180 min 3rd\mascot\_daemon\_merge.mgf

Click mouse within plot area to zoom in by factor of two about that point

Or, Plot from  to  Da

Label all possible matches  Label matches used for scoring

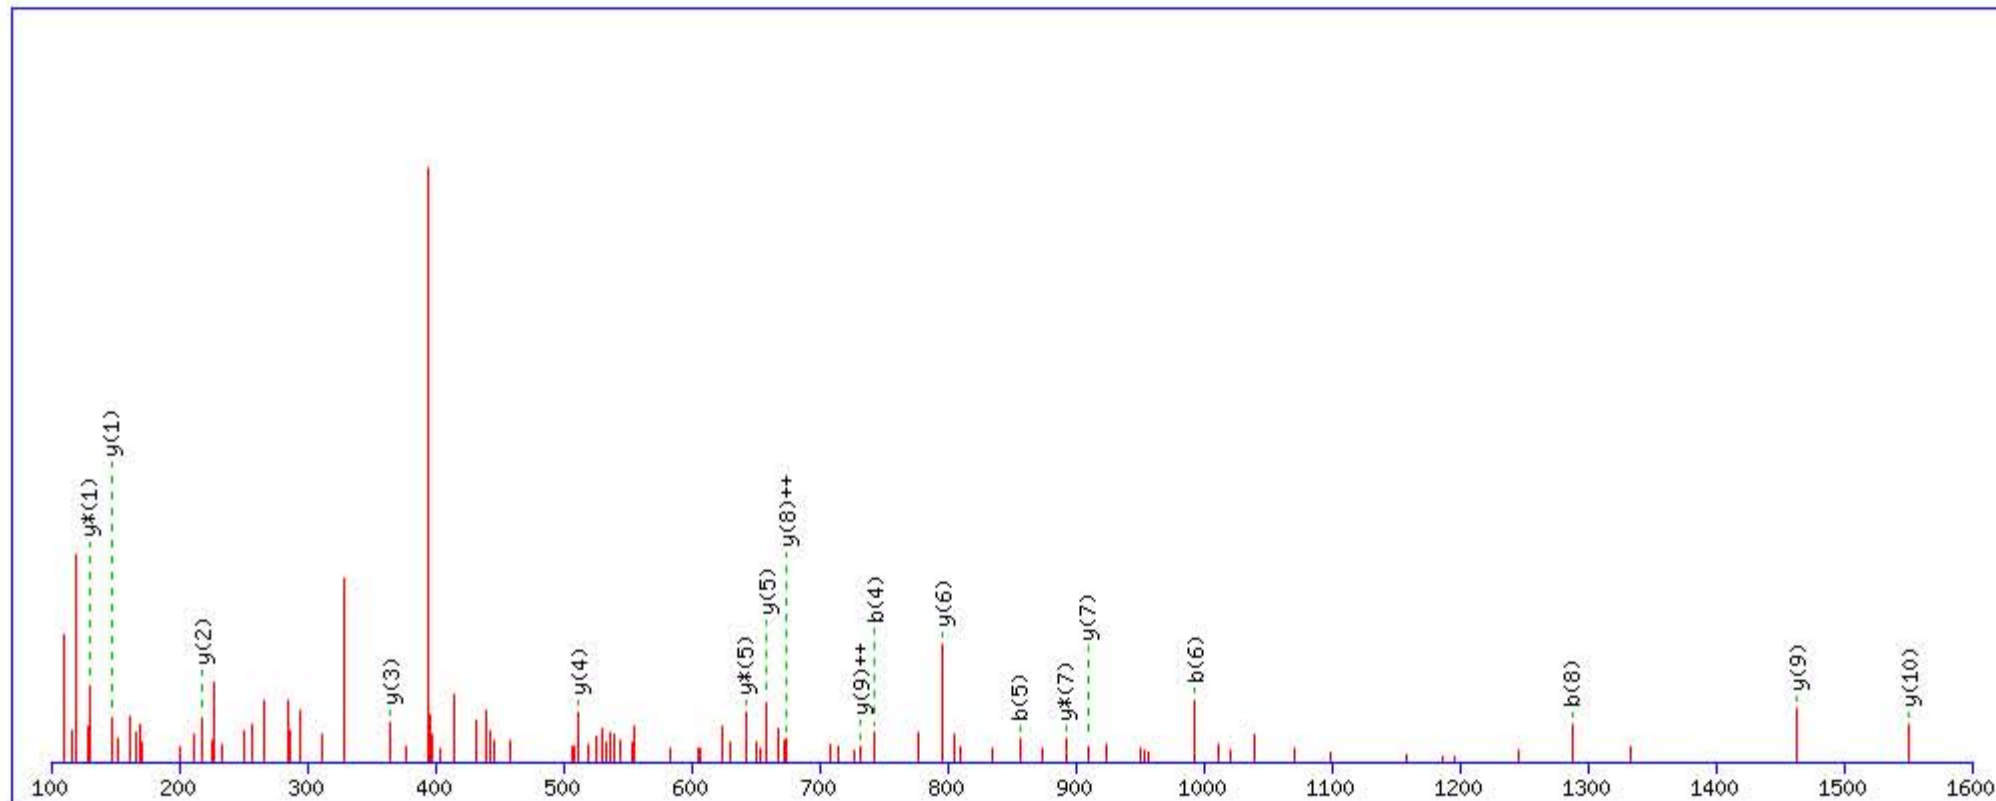

Monoisotopic mass of neutral peptide Mr(calc): 1650.822845

Fixed modifications: Carbamidomethyl (C) (apply to specified residues or termini only)

Variable modifications:

Q4 : Biotin:Thermo-21345 (Q)

Ions Score: 29 Expect: 0.029

Matches : 18/98 fragment ions using 58 most intense peaks [\(help\)](#)

| #  | b           | b <sup>++</sup> | b <sup>*</sup> | b <sup>*++</sup> | b <sup>0</sup> | b <sup>0++</sup> | Seq. | y           | y <sup>++</sup> | y <sup>*</sup> | y <sup>*++</sup> | y <sup>0</sup> | y <sup>0++</sup> | #  |
|----|-------------|-----------------|----------------|------------------|----------------|------------------|------|-------------|-----------------|----------------|------------------|----------------|------------------|----|
| 1  | 102.054955  | 51.531116       |                |                  | 84.044390      | 42.525833        | T    |             |                 |                |                  |                |                  | 11 |
| 2  | 189.086983  | 95.047129       |                |                  | 171.076418     | 86.041847        | S    | 1550.782433 | 775.894855      | 1533.755884    | 767.381580       | 1532.771868    | 766.889572       | 10 |
| 3  | 304.113926  | 152.560601      |                |                  | 286.103361     | 143.555319       | D    | 1463.750405 | 732.378841      | 1446.723856    | 723.865566       | 1445.739840    | 723.373558       | 9  |
| 4  | 743.339252  | 372.173264      | 726.312703     | 363.659989       | 725.328687     | 363.167982       | Q    | 1348.723462 | 674.865369      | 1331.696913    | 666.352095       |                |                  | 8  |
| 5  | 856.423316  | 428.715296      | 839.396767     | 420.202022       | 838.412751     | 419.710014       | I    | 909.498136  | 455.252706      | 892.471587     | 446.739432       |                |                  | 7  |
| 6  | 993.482228  | 497.244752      | 976.455679     | 488.731477       | 975.471663     | 488.239469       | H    | 796.414072  | 398.710674      | 779.387523     | 390.197400       |                |                  | 6  |
| 7  | 1140.550642 | 570.778959      | 1123.524093    | 562.265685       | 1122.540077    | 561.773676       | F    | 659.355160  | 330.181218      | 642.328611     | 321.667944       |                |                  | 5  |
| 8  | 1287.619056 | 644.313166      | 1270.592507    | 635.799892       | 1269.608491    | 635.307884       | F    | 512.286746  | 256.647011      | 495.260197     | 248.133737       |                |                  | 4  |
| 9  | 1434.687470 | 717.847373      | 1417.660921    | 709.334099       | 1416.676905    | 708.842091       | F    | 365.218332  | 183.112804      | 348.191783     | 174.599530       |                |                  | 3  |
| 10 | 1505.724584 | 753.365930      | 1488.698035    | 744.852656       | 1487.714019    | 744.360648       | A    | 218.149918  | 109.578597      | 201.123369     | 101.065322       |                |                  | 2  |
| 11 |             |                 |                |                  |                |                  | K    | 147.112804  | 74.060040       | 130.086255     | 65.546765        |                |                  | 1  |

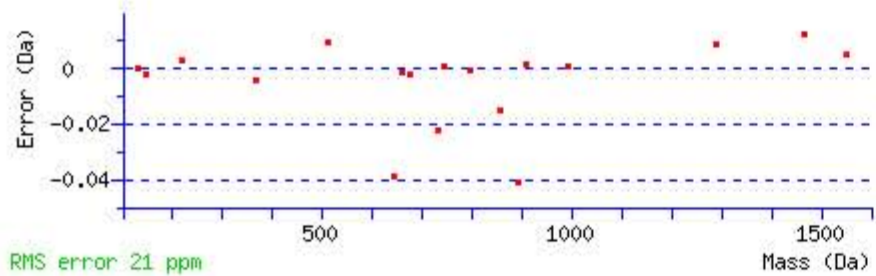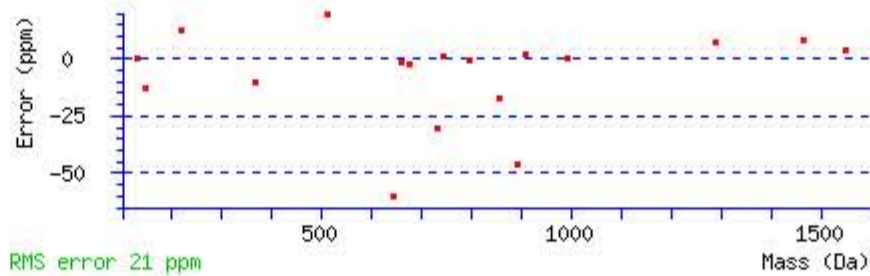

NCBI BLAST search of [TSDQIHFFFAK](#)

(Parameters: blastp, nr protein database, expect=20000, no filter, PAM30)

Other BLAST [web gateways](#)

All matches to this query

| Score | Mr(calc):   | Delta    | Sequence                    |
|-------|-------------|----------|-----------------------------|
| 29.3  | 1650.822845 | 0.005287 | <a href="#">TSDQIHFFFAK</a> |

# MATRIX SCIENCE Mascot Search Results

## Peptide View

MS/MS Fragmentation of **VAEGTQVLELPFK**  
 Found in **ANT3\_HUMAN**, Antithrombin-III OS=Homo sapiens GN=SERPINC1 PE=1 SV=1

Match to Query 34393: 1740.945672 from(581.322500,3+) rtinseconds(2557) index(34934)  
 Title: Locus:1.1.1.3554.4 File:"2013-07-02 CLN FXIII 180 min 3rd F 3.wiff"  
 Data file C:\Program Files (x86)\Matrix Science\Mascot Daemon\mgf9 FXIII 180 min 3rd\mascot\_daemon\_merge.mgf

Click mouse within plot area to zoom in by factor of two about that point

Or, Plot from  to  Da

Label all possible matches  Label matches used for scoring

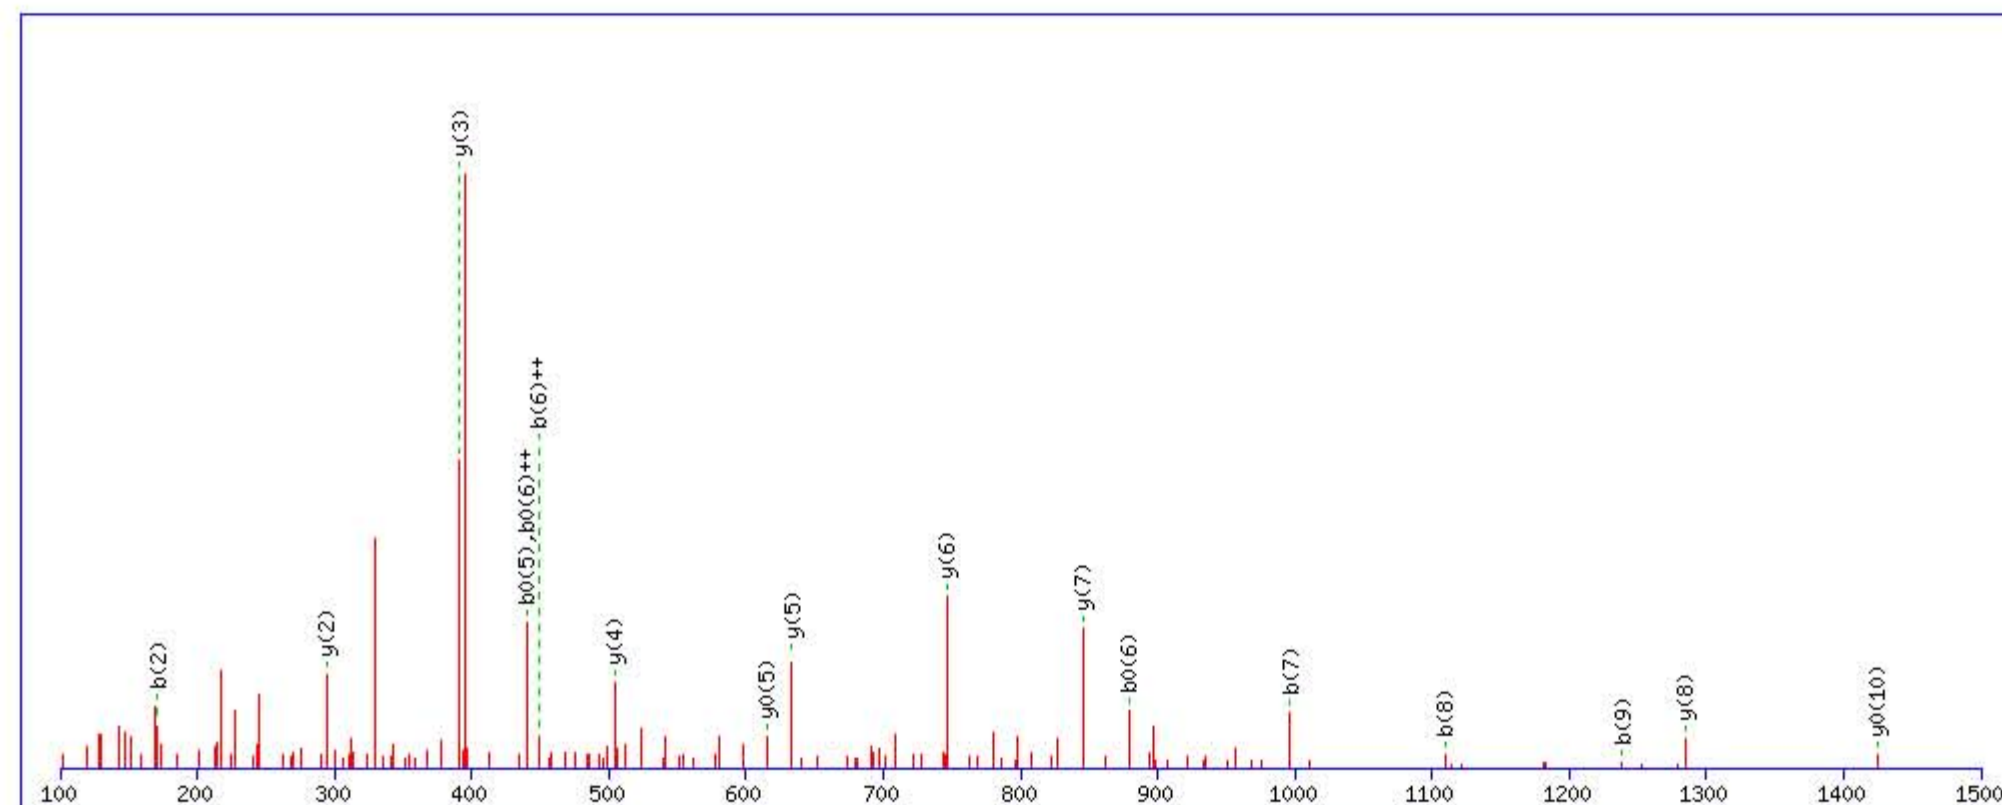

Monoisotopic mass of neutral peptide Mr(calc): 1740.948425  
 Fixed modifications: Carbamidomethyl (C) (apply to specified residues or termini only)  
 Variable modifications:  
 Q6 : Biotin:Thermo-21345 (Q)  
 Ions Score: 41 Expect: 0.0015  
 Matches : 17/122 fragment ions using 24 most intense peaks [\(help\)](#)

| #  | b                  | b <sup>++</sup>   | b <sup>*</sup> | b <sup>*++</sup> | b <sup>0</sup>    | b <sup>0++</sup>  | Seq. | y                  | y <sup>++</sup> | y <sup>*</sup> | y <sup>*++</sup> | y <sup>0</sup>     | y <sup>0++</sup> | #  |
|----|--------------------|-------------------|----------------|------------------|-------------------|-------------------|------|--------------------|-----------------|----------------|------------------|--------------------|------------------|----|
| 1  | 100.075690         | 50.541483         |                |                  |                   |                   | V    |                    |                 |                |                  |                    |                  | 13 |
| 2  | <b>171.112804</b>  | 86.060040         |                |                  |                   |                   | A    | 1642.887293        | 821.947284      | 1625.860744    | 813.434010       | 1624.876728        | 812.942002       | 12 |
| 3  | 300.155397         | 150.581336        |                |                  | 282.144832        | 141.576054        | E    | 1571.850179        | 786.428727      | 1554.823630    | 777.915453       | 1553.839614        | 777.423445       | 11 |
| 4  | 357.176861         | 179.092068        |                |                  | 339.166296        | 170.086786        | G    | 1442.807586        | 721.907431      | 1425.781037    | 713.394157       | <b>1424.797021</b> | 712.902148       | 10 |
| 5  | 458.224540         | 229.615908        |                |                  | <b>440.213975</b> | 220.610626        | T    | 1385.786122        | 693.396699      | 1368.759573    | 684.883424       | 1367.775557        | 684.391416       | 9  |
| 6  | 897.449866         | <b>449.228571</b> | 880.423317     | 440.715297       | <b>879.439301</b> | <b>440.223289</b> | Q    | <b>1284.738443</b> | 642.872860      | 1267.711894    | 634.359585       | 1266.727878        | 633.867577       | 8  |
| 7  | <b>996.518280</b>  | 498.762778        | 979.491731     | 490.249504       | 978.507715        | 489.757496        | V    | <b>845.513117</b>  | 423.260196      | 828.486568     | 414.746922       | 827.502552         | 414.254914       | 7  |
| 8  | <b>1109.602344</b> | 555.304810        | 1092.575795    | 546.791536       | 1091.591779       | 546.299527        | L    | <b>746.444703</b>  | 373.725989      | 729.418154     | 365.212715       | 728.434138         | 364.720707       | 6  |
| 9  | <b>1238.644937</b> | 619.826106        | 1221.618388    | 611.312832       | 1220.634372       | 610.820824        | E    | <b>633.360639</b>  | 317.183958      | 616.334090     | 308.670683       | <b>615.350074</b>  | 308.178675       | 5  |
| 10 | 1351.729001        | 676.368138        | 1334.702452    | 667.854864       | 1333.718436       | 667.362856        | L    | <b>504.318046</b>  | 252.662661      | 487.291497     | 244.149386       |                    |                  | 4  |
| 11 | 1448.781765        | 724.894520        | 1431.755216    | 716.381246       | 1430.771200       | 715.889238        | P    | <b>391.233982</b>  | 196.120629      | 374.207433     | 187.607355       |                    |                  | 3  |
| 12 | 1595.850179        | 798.428727        | 1578.823630    | 789.915453       | 1577.839614       | 789.423445        | F    | <b>294.181218</b>  | 147.594247      | 277.154669     | 139.080973       |                    |                  | 2  |
| 13 |                    |                   |                |                  |                   |                   | K    | 147.112804         | 74.060040       | 130.086255     | 65.546765        |                    |                  | 1  |

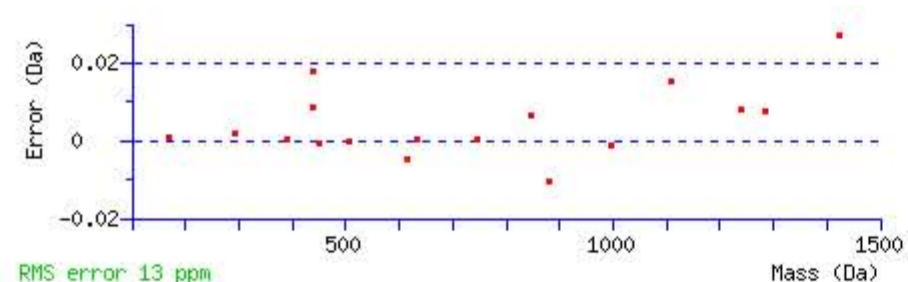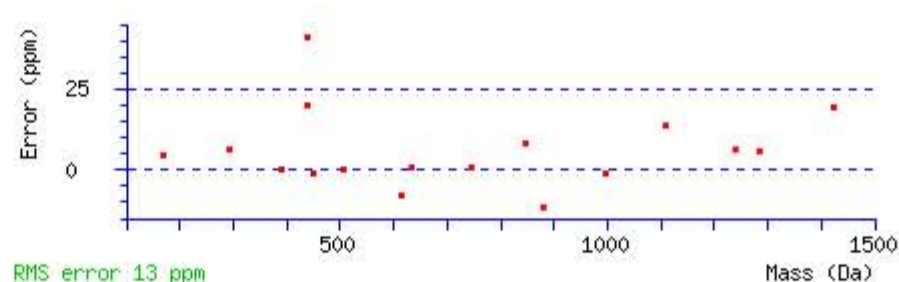

NCBI BLAST search of **VAEGTQVLELPFK**  
 (Parameters: blastp, nr protein database, expect=20000, no filter, PAM30)  
 Other BLAST [web gateways](#)

## All matches to this query

| Score | Mr(calc):   | Delta     | Sequence                      |
|-------|-------------|-----------|-------------------------------|
| 41.3  | 1740.948425 | -0.002753 | <a href="#">VAEGTQVLELPFK</a> |

Mascot: <http://www.matrixscience.com/>

# MASCOT SEARCH RESULTS

## Peptide View

MS/MS Fragmentation of **FATTFYQHLADSK**

Found in **ANT3\_HUMAN**, Antithrombin-III OS=Homo sapiens GN=SERPINC1 PE=1 SV=1

Match to Query 36427: 1838.906022 from(613.975950,3+) rtinseconds(2100) index(19609)

Title: Locus:1.1.1.3297.8 File:"2013-07-02 CLN FXIII 180 min 3rd F 2.wiff"

Data file C:\Program Files (x86)\Matrix Science\Mascot Daemon\mgf\9 FXIII 180 min 3rd\mascot\_daemon\_merge.mgf

Click mouse within plot area to zoom in by factor of two about that point

Or, Plot from  to  Da

Label all possible matches  Label matches used for scoring

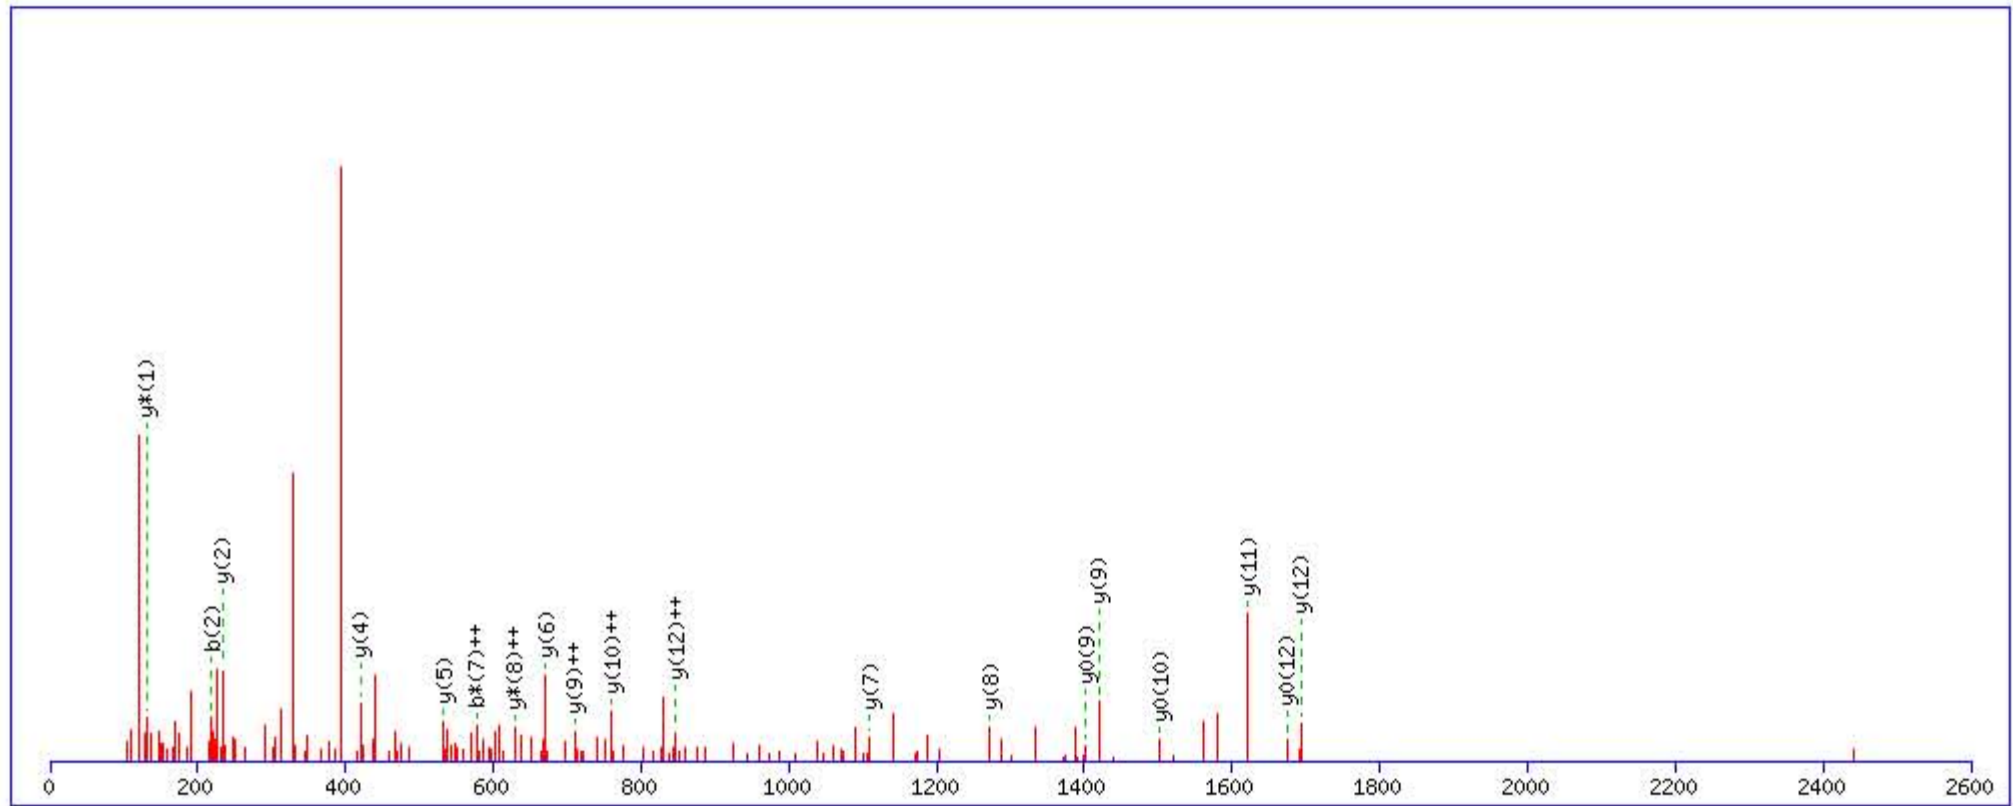

Monoisotopic mass of neutral peptide Mr(calc): 1838.902542

Fixed modifications: Carbamidomethyl (C) (apply to specified residues or termini only)

Variable modifications:

Q7 : Biotin:Thermo-21345 (Q)

Ions Score: 32 Expect: 0.014

Matches : 19/126 fragment ions using 48 most intense peaks [\(help\)](#)

| #  | b                 | b <sup>++</sup> | b <sup>*</sup> | b <sup>*++</sup>  | b <sup>0</sup> | b <sup>0++</sup> | Seq. | y                  | y <sup>++</sup>   | y <sup>*</sup>    | y <sup>*++</sup>  | y <sup>0</sup>     | y <sup>0++</sup> | #  |
|----|-------------------|-----------------|----------------|-------------------|----------------|------------------|------|--------------------|-------------------|-------------------|-------------------|--------------------|------------------|----|
| 1  | 148.075690        | 74.541483       |                |                   |                |                  | F    |                    |                   |                   |                   |                    |                  | 13 |
| 2  | <b>219.112804</b> | 110.060040      |                |                   |                |                  | A    | <b>1692.841406</b> | <b>846.924341</b> | 1675.814857       | 838.411067        | <b>1674.830841</b> | 837.919059       | 12 |
| 3  | 320.160483        | 160.583879      |                |                   | 302.149918     | 151.578597       | T    | <b>1621.804292</b> | 811.405784        | 1604.777743       | 802.892510        | 1603.793727        | 802.400502       | 11 |
| 4  | 421.208162        | 211.107719      |                |                   | 403.197597     | 202.102437       | T    | 1520.756613        | <b>760.881945</b> | 1503.730064       | 752.368670        | <b>1502.746048</b> | 751.876662       | 10 |
| 5  | 568.276576        | 284.641926      |                |                   | 550.266011     | 275.636644       | F    | <b>1419.708934</b> | <b>710.358105</b> | 1402.682385       | 701.844831        | <b>1401.698369</b> | 701.352823       | 9  |
| 6  | 731.339905        | 366.173591      |                |                   | 713.329340     | 357.168308       | Y    | <b>1272.640520</b> | 636.823898        | 1255.613971       | <b>628.310624</b> | 1254.629955        | 627.818616       | 8  |
| 7  | 1170.565231       | 585.786254      | 1153.538682    | <b>577.272979</b> | 1152.554666    | 576.780971       | Q    | <b>1109.577191</b> | 555.292234        | 1092.550642       | 546.778959        | 1091.566626        | 546.286951       | 7  |
| 8  | 1307.624143       | 654.315710      | 1290.597594    | 645.802435        | 1289.613578    | 645.310427       | H    | <b>670.351865</b>  | 335.679571        | 653.325316        | 327.166296        | 652.341300         | 326.674288       | 6  |
| 9  | 1420.708207       | 710.857741      | 1403.681658    | 702.344467        | 1402.697642    | 701.852459       | L    | <b>533.292953</b>  | 267.150115        | 516.266404        | 258.636840        | 515.282388         | 258.144832       | 5  |
| 10 | 1491.745321       | 746.376298      | 1474.718772    | 737.863024        | 1473.734756    | 737.371016       | A    | <b>420.208889</b>  | 210.608083        | 403.182340        | 202.094808        | 402.198324         | 201.602800       | 4  |
| 11 | 1606.772264       | 803.889770      | 1589.745715    | 795.376496        | 1588.761699    | 794.884487       | D    | 349.171775         | 175.089526        | 332.145226        | 166.576251        | 331.161210         | 166.084243       | 3  |
| 12 | 1693.804292       | 847.405784      | 1676.777743    | 838.892510        | 1675.793727    | 838.400502       | S    | <b>234.144832</b>  | 117.576054        | 217.118283        | 109.062780        | 216.134267         | 108.570772       | 2  |
| 13 |                   |                 |                |                   |                |                  | K    | 147.112804         | 74.060040         | <b>130.086255</b> | 65.546765         |                    |                  | 1  |

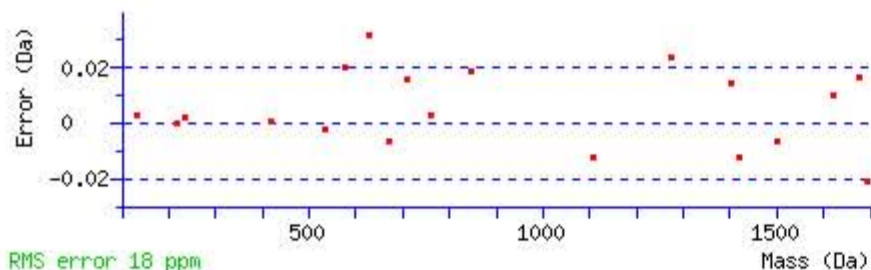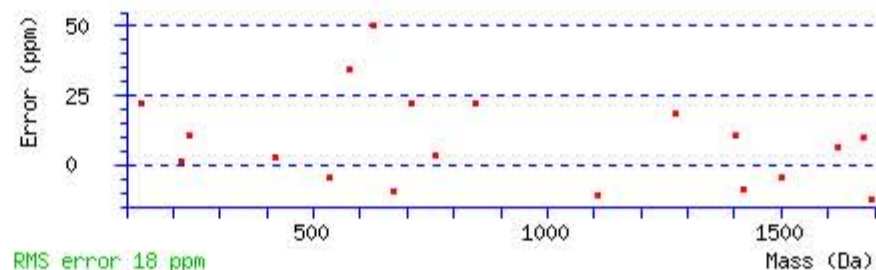

NCBI BLAST search of **FATTFYQHLADSK**

(Parameters: blastp, nr protein database, expect=20000, no filter, PAM30)

Other BLAST [web gateways](#)

All matches to this query

| Score | Mr(calc):   | Delta    | Sequence                      |
|-------|-------------|----------|-------------------------------|
| 32.0  | 1838.902542 | 0.003480 | <a href="#">FATTFYQHLADSK</a> |

Mascot: <http://www.matrixscience.com/>

**MATRIX SCIENCE Mascot Search Results**

**Peptide View**

MS/MS Fragmentation of **LQPLDFKENAEQSR**

Found in **ANT3\_HUMAN**, Antithrombin-III OS=Homo sapiens GN=SERPINC1 PE=1 SV=1

Match to Query 39045: 1985.000862 from(662.674230,3+) rtinseconds(1925) index(18535)

Title: Locus:1.1.1.3236.12 File:"2013-07-02 CLN FXIII 180 min 3rd F 2.wiff"

Data file C:\Program Files (x86)\Matrix Science\Mascot Daemon\mgf\9 FXIII 180 min 3rd\mascot\_daemon\_merge.mgf

Click mouse within plot area to zoom in by factor of two about that point

Or, Plot from 100 to 1800 Da Full range

Label all possible matches  Label matches used for scoring

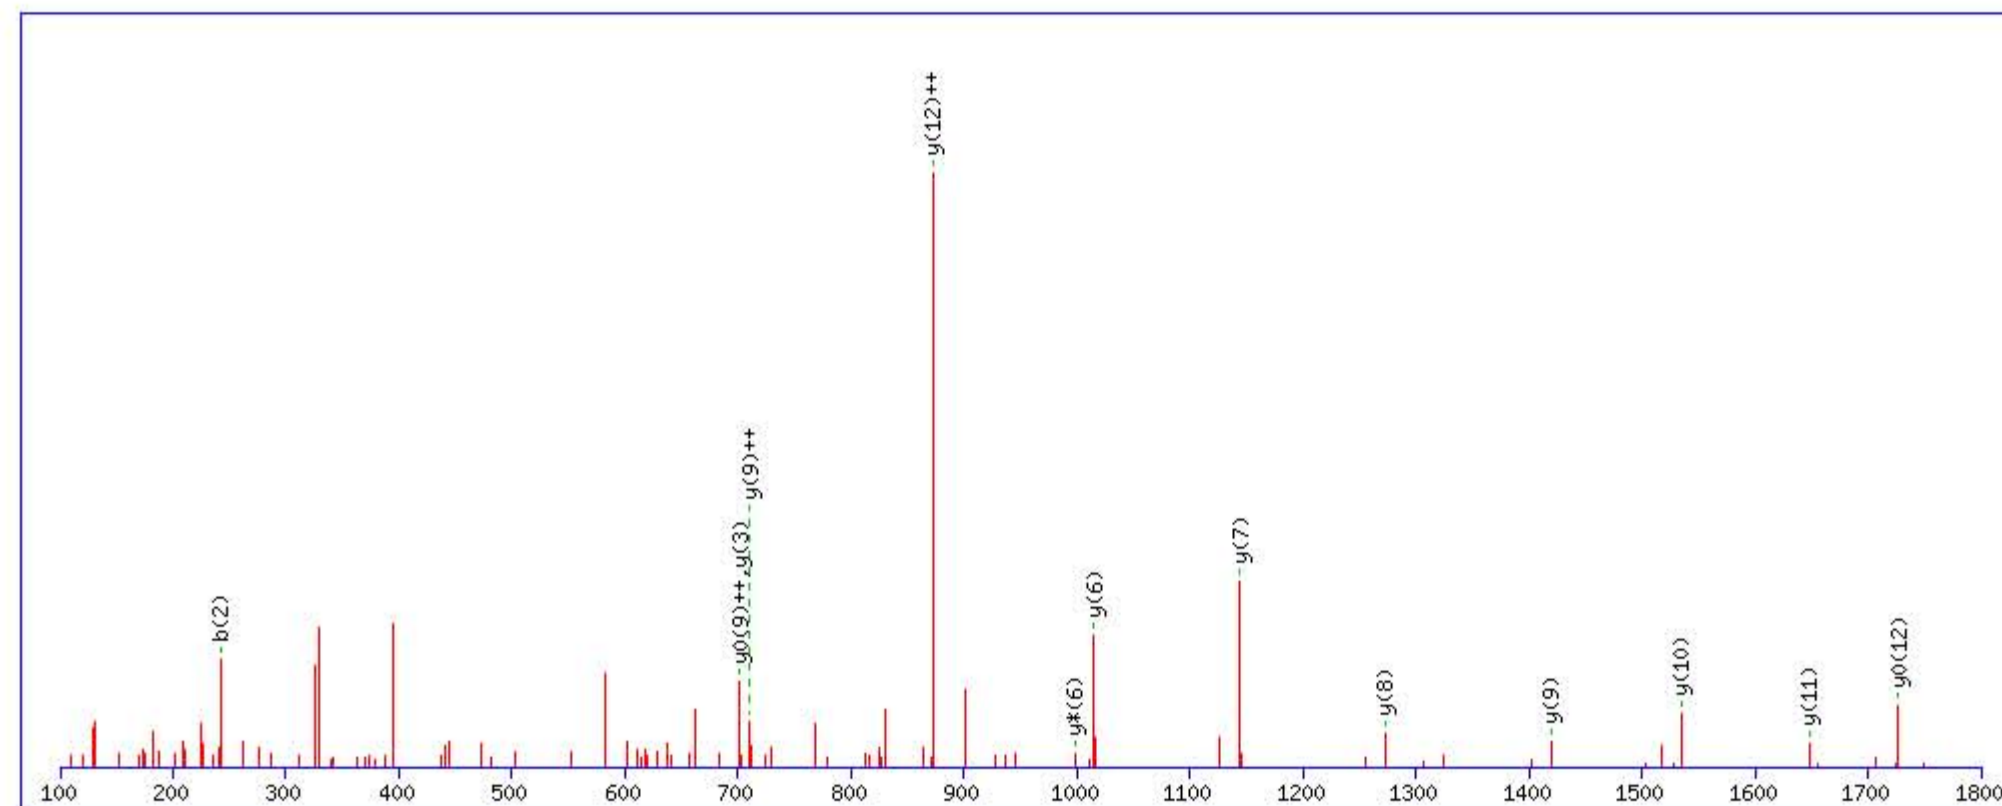

Monoisotopic mass of neutral peptide Mr(calc): 1985.004013

Fixed modifications: Carbamidomethyl (C) (apply to specified residues or termini only)

Variable modifications:

Q12 : Biotin:Thermo-21345 (Q)

Ions Score: 44 Expect: 0.00099

Matches : 13/144 fragment ions using 17 most intense peaks [\(help\)](#)

| #  | b           | b <sup>++</sup> | b <sup>*</sup> | b <sup>*++</sup> | b <sup>0</sup> | b <sup>0++</sup> | Seq. | y           | y <sup>++</sup> | y <sup>*</sup> | y <sup>*++</sup> | y <sup>0</sup> | y <sup>0++</sup> | #  |
|----|-------------|-----------------|----------------|------------------|----------------|------------------|------|-------------|-----------------|----------------|------------------|----------------|------------------|----|
| 1  | 114.091340  | 57.549308       |                |                  |                |                  | L    |             |                 |                |                  |                |                  | 14 |
| 2  | 242.149918  | 121.578597      | 225.123369     | 113.065323       |                |                  | Q    | 1872.927259 | 936.967268      | 1855.900710    | 928.453993       | 1854.916694    | 927.961985       | 13 |
| 3  | 339.202682  | 170.104979      | 322.176133     | 161.591705       |                |                  | P    | 1744.868681 | 872.937979      | 1727.842132    | 864.424704       | 1726.858116    | 863.932696       | 12 |
| 4  | 452.286746  | 226.647011      | 435.260197     | 218.133737       |                |                  | L    | 1647.815917 | 824.411597      | 1630.789368    | 815.898322       | 1629.805352    | 815.406314       | 11 |
| 5  | 567.313689  | 284.160483      | 550.287140     | 275.647208       | 549.303124     | 275.155200       | D    | 1534.731853 | 767.869565      | 1517.705304    | 759.356290       | 1516.721288    | 758.864282       | 10 |
| 6  | 714.382103  | 357.694690      | 697.355554     | 349.181415       | 696.371538     | 348.689407       | F    | 1419.704910 | 710.356093      | 1402.678361    | 701.842819       | 1401.694345    | 701.350811       | 9  |
| 7  | 842.477066  | 421.742171      | 825.450517     | 413.228897       | 824.466501     | 412.736889       | K    | 1272.636496 | 636.821886      | 1255.609947    | 628.308612       | 1254.625931    | 627.816604       | 8  |
| 8  | 971.519659  | 486.263468      | 954.493110     | 477.750193       | 953.509094     | 477.258185       | E    | 1144.541533 | 572.774405      | 1127.514984    | 564.261130       | 1126.530968    | 563.769122       | 7  |
| 9  | 1085.562586 | 543.284931      | 1068.536037    | 534.771657       | 1067.552021    | 534.279649       | N    | 1015.498940 | 508.253108      | 998.472391     | 499.739834       | 997.488375     | 499.247826       | 6  |
| 10 | 1156.599700 | 578.803488      | 1139.573151    | 570.290214       | 1138.589135    | 569.798205       | A    | 901.456013  | 451.231645      | 884.429464     | 442.718370       | 883.445448     | 442.226362       | 5  |
| 11 | 1285.642293 | 643.324785      | 1268.615744    | 634.811510       | 1267.631728    | 634.319502       | E    | 830.418899  | 415.713088      | 813.392350     | 407.199813       | 812.408334     | 406.707805       | 4  |
| 12 | 1724.867619 | 862.937448      | 1707.841070    | 854.424173       | 1706.857054    | 853.932165       | Q    | 701.376306  | 351.191791      | 684.349757     | 342.678517       | 683.365741     | 342.186509       | 3  |
| 13 | 1811.899647 | 906.453462      | 1794.873098    | 897.940187       | 1793.889082    | 897.448179       | S    | 262.150980  | 131.579128      | 245.124431     | 123.065854       | 244.140415     | 122.573846       | 2  |
| 14 |             |                 |                |                  |                |                  | R    | 175.118952  | 88.063114       | 158.092403     | 79.549839        |                |                  | 1  |

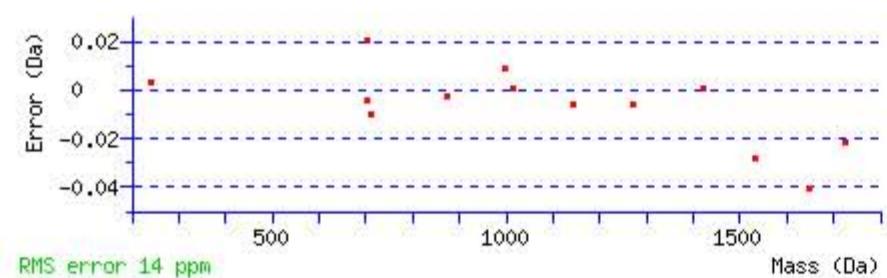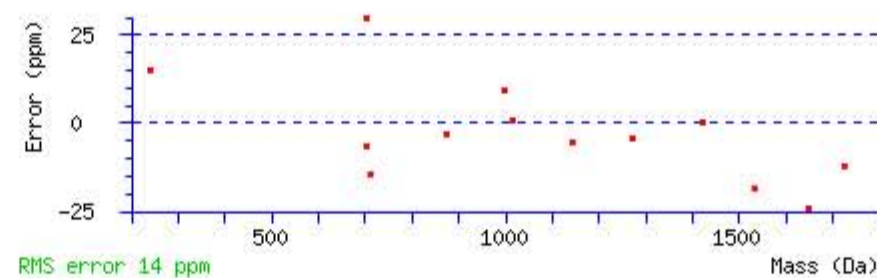

NCBI BLAST search of [LQPLDFKENAEQSR](#)

(Parameters: blastp, nr protein database, expect=20000, no filter, PAM30)

Other BLAST [web gateways](#)

**All matches to this query**

| Score | Mr(calc):   | Delta     | Sequence                       |
|-------|-------------|-----------|--------------------------------|
| 44.2  | 1985.004013 | -0.003151 | <a href="#">LQPLDFKENAEQSR</a> |

# MASCOT SEARCH RESULTS

## Peptide View

MS/MS Fragmentation of **LFLEPTQADIALLK**

Found in **APOA\_HUMAN**, Apolipoprotein(a) OS=Homo sapiens GN=LPA PE=1 SV=1

Match to Query 37211: 1882.065168 from(942.039860,2+) rtinseconds(2781) index(36509)

Title: Locus:1.1.1.3630.22 File:"2013-07-02 CLN FXIII 180 min 3rd F 3.wiff"

Data file C:\Program Files (x86)\Matrix Science\Mascot Daemon\mgf\9 FXIII 180 min 3rd\mascot\_daemon\_merge.mgf

Click mouse within plot area to zoom in by factor of two about that point

Or, Plot from  to  Da

Label all possible matches  Label matches used for scoring

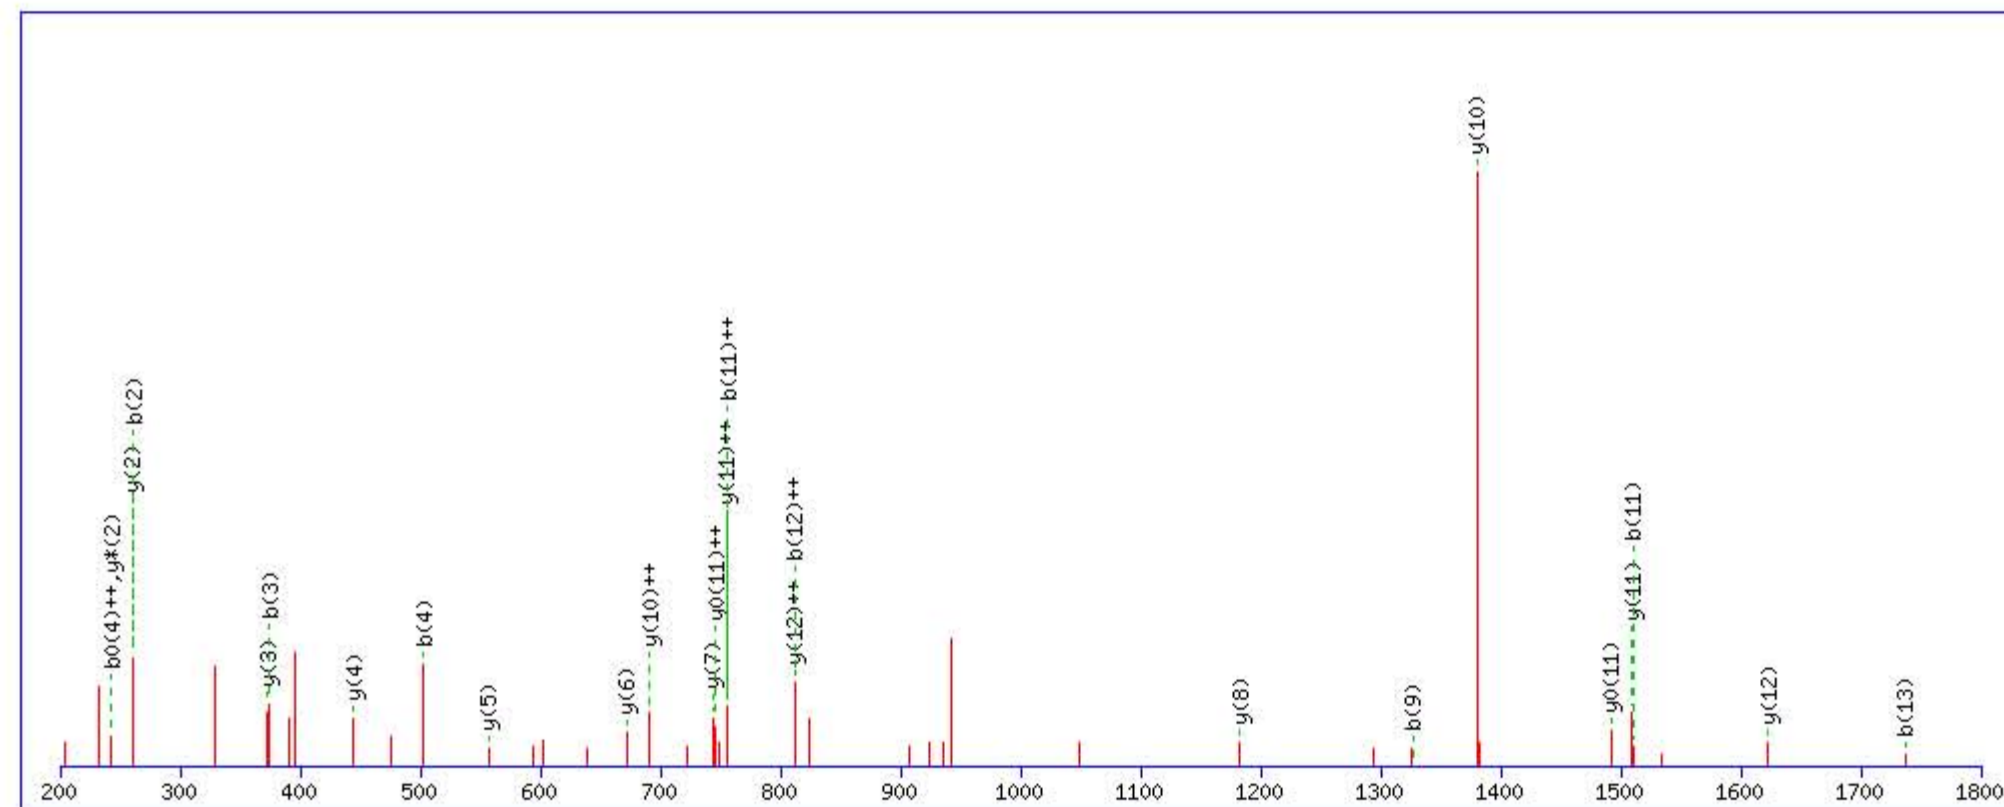

Monoisotopic mass of neutral peptide  $M_r(\text{calc})$ : 1882.063766

Fixed modifications: Carbamidomethyl (C) (apply to specified residues or termini only)

Variable modifications:

Q7 : Biotin:Thermo-21345 (Q)

Ions Score: 62 Expect: 7.4e-006

Matches : 25/128 fragment ions using 44 most intense peaks [\(help\)](#)

| #  | b                  | b <sup>++</sup>   | b <sup>+</sup> | b <sup>+++</sup> | b <sup>0</sup> | b <sup>0++</sup>  | Seq.     | y                  | y <sup>++</sup>   | y <sup>+</sup>    | y <sup>+++</sup> | y <sup>0</sup>     | y <sup>0++</sup>  | #         |
|----|--------------------|-------------------|----------------|------------------|----------------|-------------------|----------|--------------------|-------------------|-------------------|------------------|--------------------|-------------------|-----------|
| 1  | 114.091340         | 57.549308         |                |                  |                |                   | <b>L</b> |                    |                   |                   |                  |                    |                   | <b>14</b> |
| 2  | <b>261.159754</b>  | 131.083515        |                |                  |                |                   | <b>F</b> | 1769.987007        | 885.497142        | 1752.960458       | 876.983867       | 1751.976442        | 876.491859        | <b>13</b> |
| 3  | <b>374.243818</b>  | 187.625547        |                |                  |                |                   | <b>L</b> | <b>1622.918593</b> | <b>811.962934</b> | 1605.892044       | 803.449660       | 1604.908028        | 802.957652        | <b>12</b> |
| 4  | <b>503.286411</b>  | 252.146843        |                |                  | 485.275846     | <b>243.141561</b> | <b>E</b> | <b>1509.834529</b> | <b>755.420903</b> | 1492.807980       | 746.907628       | <b>1491.823964</b> | <b>746.415620</b> | <b>11</b> |
| 5  | 600.339175         | 300.673226        |                |                  | 582.328610     | 291.667943        | <b>P</b> | <b>1380.791936</b> | <b>690.899606</b> | 1363.765387       | 682.386331       | 1362.781371        | 681.894323        | <b>10</b> |
| 6  | 701.386854         | 351.197065        |                |                  | 683.376289     | 342.191783        | <b>T</b> | 1283.739172        | 642.373224        | 1266.712623       | 633.859949       | 1265.728607        | 633.367941        | <b>9</b>  |
| 7  | 1140.612180        | 570.809728        | 1123.585631    | 562.296454       | 1122.601615    | 561.804446        | <b>Q</b> | <b>1182.691493</b> | 591.849384        | 1165.664944       | 583.336110       | 1164.680928        | 582.844102        | <b>8</b>  |
| 8  | 1211.649294        | 606.328285        | 1194.622745    | 597.815011       | 1193.638729    | 597.323003        | <b>A</b> | <b>743.466167</b>  | 372.236721        | 726.439618        | 363.723447       | 725.455602         | 363.231439        | <b>7</b>  |
| 9  | <b>1326.676237</b> | 663.841757        | 1309.649688    | 655.328482       | 1308.665672    | 654.836474        | <b>D</b> | <b>672.429053</b>  | 336.718164        | 655.402504        | 328.204890       | 654.418488         | 327.712882        | <b>6</b>  |
| 10 | 1439.760301        | 720.383789        | 1422.733752    | 711.870514       | 1421.749736    | 711.378506        | <b>I</b> | <b>557.402110</b>  | 279.204693        | 540.375561        | 270.691418       |                    |                   | <b>5</b>  |
| 11 | <b>1510.797415</b> | <b>755.902346</b> | 1493.770866    | 747.389071       | 1492.786850    | 746.897063        | <b>A</b> | <b>444.318046</b>  | 222.662661        | 427.291497        | 214.149386       |                    |                   | <b>4</b>  |
| 12 | 1623.881479        | <b>812.444377</b> | 1606.854930    | 803.931103       | 1605.870914    | 803.439095        | <b>L</b> | <b>373.280932</b>  | 187.144104        | 356.254383        | 178.630829       |                    |                   | <b>3</b>  |
| 13 | <b>1736.965543</b> | 868.986409        | 1719.938994    | 860.473135       | 1718.954978    | 859.981127        | <b>L</b> | <b>260.196868</b>  | 130.602072        | <b>243.170319</b> | 122.088797       |                    |                   | <b>2</b>  |
| 14 |                    |                   |                |                  |                |                   | <b>K</b> | 147.112804         | 74.060040         | 130.086255        | 65.546765        |                    |                   | <b>1</b>  |

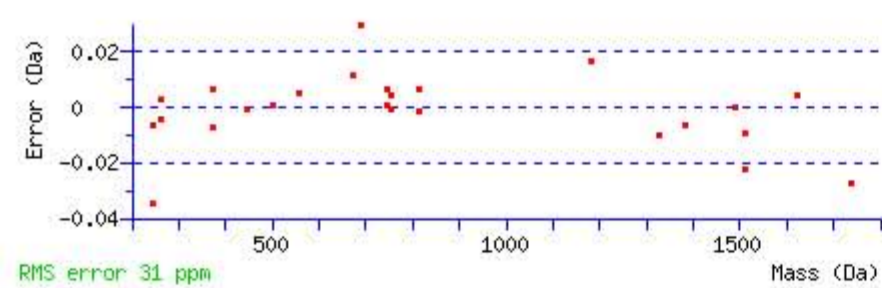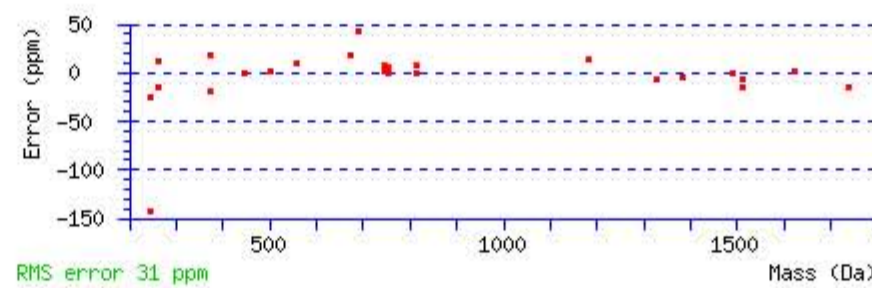

NCBI BLAST search of **LFLEPTQADIALLK**

(Parameters: blastp, nr protein database, expect=20000, no filter, PAM30)

Other BLAST [web gateways](#)

All matches to this query

| Score | $M_r(\text{calc})$ : | Delta     | Sequence                          |
|-------|----------------------|-----------|-----------------------------------|
| 61.5  | 1882.063766          | 0.001402  | <a href="#">LFLEPTQADIALLK</a>    |
| 6.4   | 1882.077469          | -0.012301 | <a href="#">NLQEVLGEEKLKEILK</a>  |
| 5.8   | 1882.041122          | 0.024046  | <a href="#">LLIIDSNLGVQDVENLK</a> |
| 1.6   | 1882.046021          | 0.019147  | <a href="#">FLLLPDMMIKGLFGKK</a>  |
| 1.2   | 1882.053238          | 0.011930  | <a href="#">NQMITRVPLGSVIK</a>    |
| 0.8   | 1882.045792          | 0.019376  | <a href="#">EAIQSNKRLSALNK</a>    |

# MASCOT SEARCH RESULTS

## Peptide View

MS/MS Fragmentation of **AELQEGAR**

Found in **APOA1\_HUMAN**, Apolipoprotein A-I OS=Homo sapiens GN=APOA1 PE=1 SV=1

Match to Query 17361: 1183.598648 from(592.806600,2+) rtinseconds(1514) index(15939)

Title: Locus:1.1.1.3093.9 File:"2013-07-02 CLN FXIII 180 min 3rd F 2.wiff"

Data file C:\Program Files (x86)\Matrix Science\Mascot Daemon\mgf9 FXIII 180 min 3rd\mascot\_daemon\_merge.mgf

Click mouse within plot area to zoom in by factor of two about that point

Or, Plot from  to  Da

Label all possible matches  Label matches used for scoring

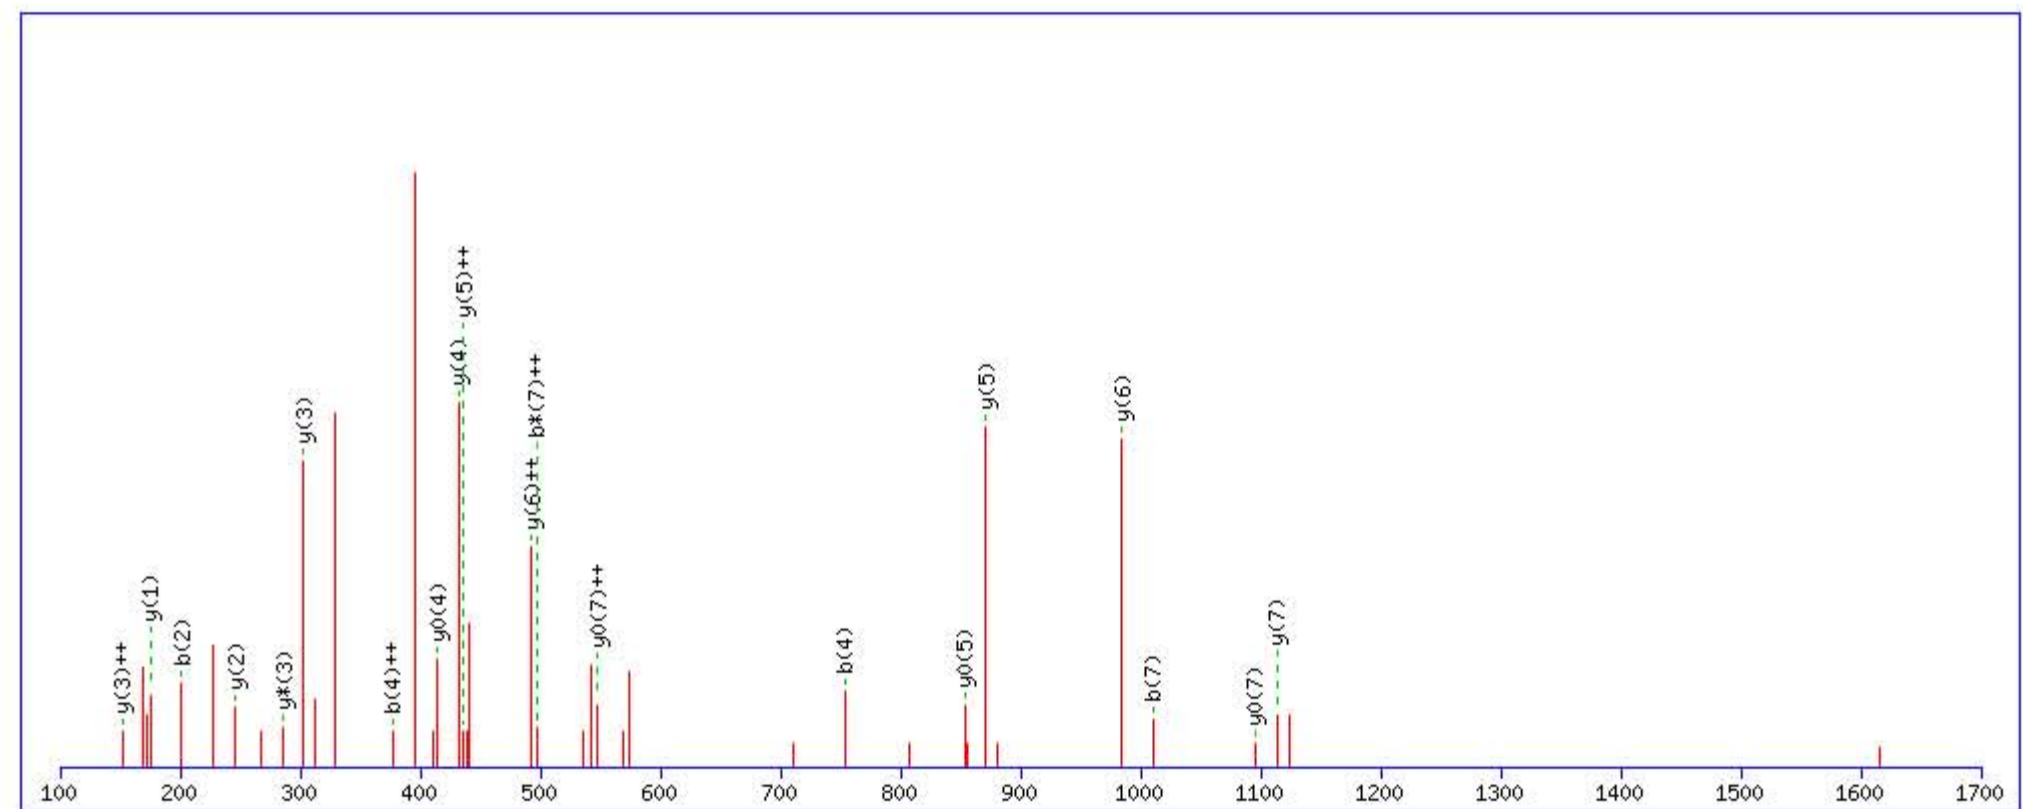

Monoisotopic mass of neutral peptide Mr(calc): 1183.601913

Fixed modifications: Carbamidomethyl (C) (apply to specified residues or termini only)

Variable modifications:

Q4 : Biotin:Thermo-21345 (Q)

Ions Score: 41 Expect: 0.0014

Matches : 20/70 fragment ions using 38 most intense peaks ([help](#))

| # | b                  | b <sup>++</sup>   | b <sup>*</sup> | b <sup>*++</sup>  | b <sup>0</sup> | b <sup>0++</sup> | Seq. | y                  | y <sup>++</sup>   | y <sup>*</sup>    | y <sup>*++</sup> | y <sup>0</sup>     | y <sup>0++</sup>  | # |
|---|--------------------|-------------------|----------------|-------------------|----------------|------------------|------|--------------------|-------------------|-------------------|------------------|--------------------|-------------------|---|
| 1 | 72.044390          | 36.525833         |                |                   |                |                  | A    |                    |                   |                   |                  |                    |                   | 8 |
| 2 | <b>201.086983</b>  | 101.047130        |                |                   | 183.076418     | 92.041847        | E    | <b>1113.572106</b> | 557.289691        | 1096.545557       | 548.776417       | <b>1095.561541</b> | <b>548.284409</b> | 7 |
| 3 | 314.171047         | 157.589161        |                |                   | 296.160482     | 148.583879       | L    | <b>984.529513</b>  | <b>492.768395</b> | 967.502964        | 484.255120       | 966.518948         | 483.763112        | 6 |
| 4 | <b>753.396373</b>  | <b>377.201825</b> | 736.369824     | 368.688550        | 735.385808     | 368.196542       | Q    | <b>871.445449</b>  | <b>436.226363</b> | 854.418900        | 427.713088       | <b>853.434884</b>  | 427.221080        | 5 |
| 5 | 882.438966         | 441.723121        | 865.412417     | 433.209847        | 864.428401     | 432.717839       | E    | <b>432.220123</b>  | 216.613699        | 415.193574        | 208.100425       | <b>414.209558</b>  | 207.608417        | 4 |
| 6 | 939.460430         | 470.233853        | 922.433881     | 461.720579        | 921.449865     | 461.228571       | G    | <b>303.177530</b>  | <b>152.092403</b> | <b>286.150981</b> | 143.579128       |                    |                   | 3 |
| 7 | <b>1010.497544</b> | 505.752410        | 993.470995     | <b>497.239136</b> | 992.486979     | 496.747128       | A    | <b>246.156066</b>  | 123.581671        | 229.129517        | 115.068396       |                    |                   | 2 |
| 8 |                    |                   |                |                   |                |                  | R    | <b>175.118952</b>  | 88.063114         | 158.092403        | 79.549839        |                    |                   | 1 |

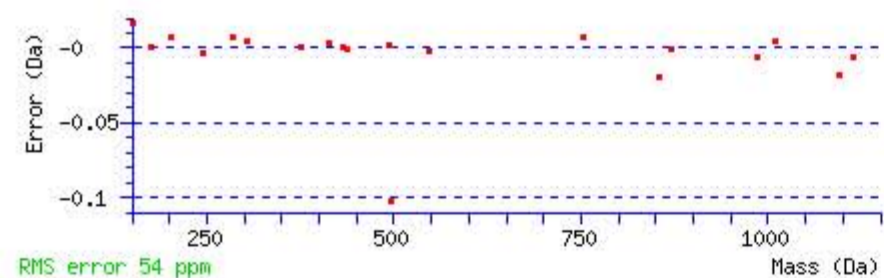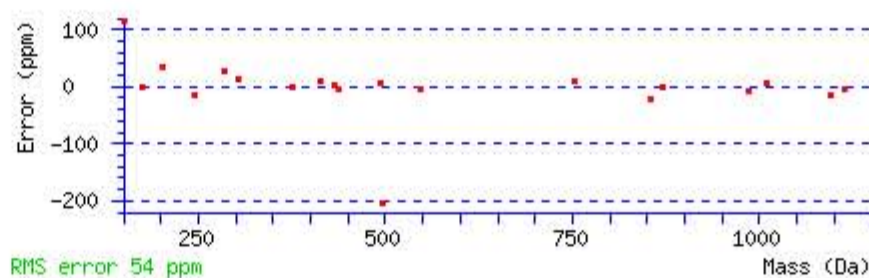

NCBI BLAST search of **AELQEGAR**

(Parameters: blastp, nr protein database, expect=20000, no filter, PAM30)

Other BLAST [web gateways](#)

All matches to this query

| Score | Mr(calc):   | Delta     | Sequence                     |
|-------|-------------|-----------|------------------------------|
| 40.7  | 1183.601913 | -0.003265 | <a href="#">AELQEGAR</a>     |
| 10.2  | 1183.601913 | -0.003265 | <a href="#">EALQQR</a>       |
| 9.4   | 1183.601913 | -0.003265 | <a href="#">QLAEQER</a>      |
| 5.7   | 1183.613815 | -0.015167 | <a href="#">FHFEALPPAR</a>   |
| 4.4   | 1183.587997 | 0.010651  | <a href="#">EAKLDHCRR</a>    |
| 3.7   | 1183.605743 | -0.007095 | <a href="#">APSERRSPER</a>   |
| 3.6   | 1183.601913 | -0.003265 | <a href="#">AQEQELR</a>      |
| 3.6   | 1183.583282 | 0.015366  | <a href="#">EAASSPAGEPLR</a> |
| 3.3   | 1183.601913 | -0.003265 | <a href="#">ELQAEAGR</a>     |
| 3.1   | 1183.607132 | -0.008484 | <a href="#">GGFRGGRGGAHR</a> |

# MASCOT SEARCH RESULTS

## Peptide View

MS/MS Fragmentation of **QGLLPVLESFK**

Found in **APOA1\_HUMAN**, Apolipoprotein A-I OS=Homo sapiens GN=APOA1 PE=1 SV=1

Match to Query 28320: 1540.867008 from(771.440780,2+) rtinseconds(2836) index(36948)

Title: Locus:1.1.1.3649.14 File:"2013-07-02 CLN FXIII 180 min 3rd F 3.wiff"

Data file C:\Program Files (x86)\Matrix Science\Mascot Daemon\mgf\9 FXIII 180 min 3rd\mascot\_daemon\_merge.mgf

Click mouse within plot area to zoom in by factor of two about that point

Or, Plot from  to  Da

Label all possible matches  Label matches used for scoring

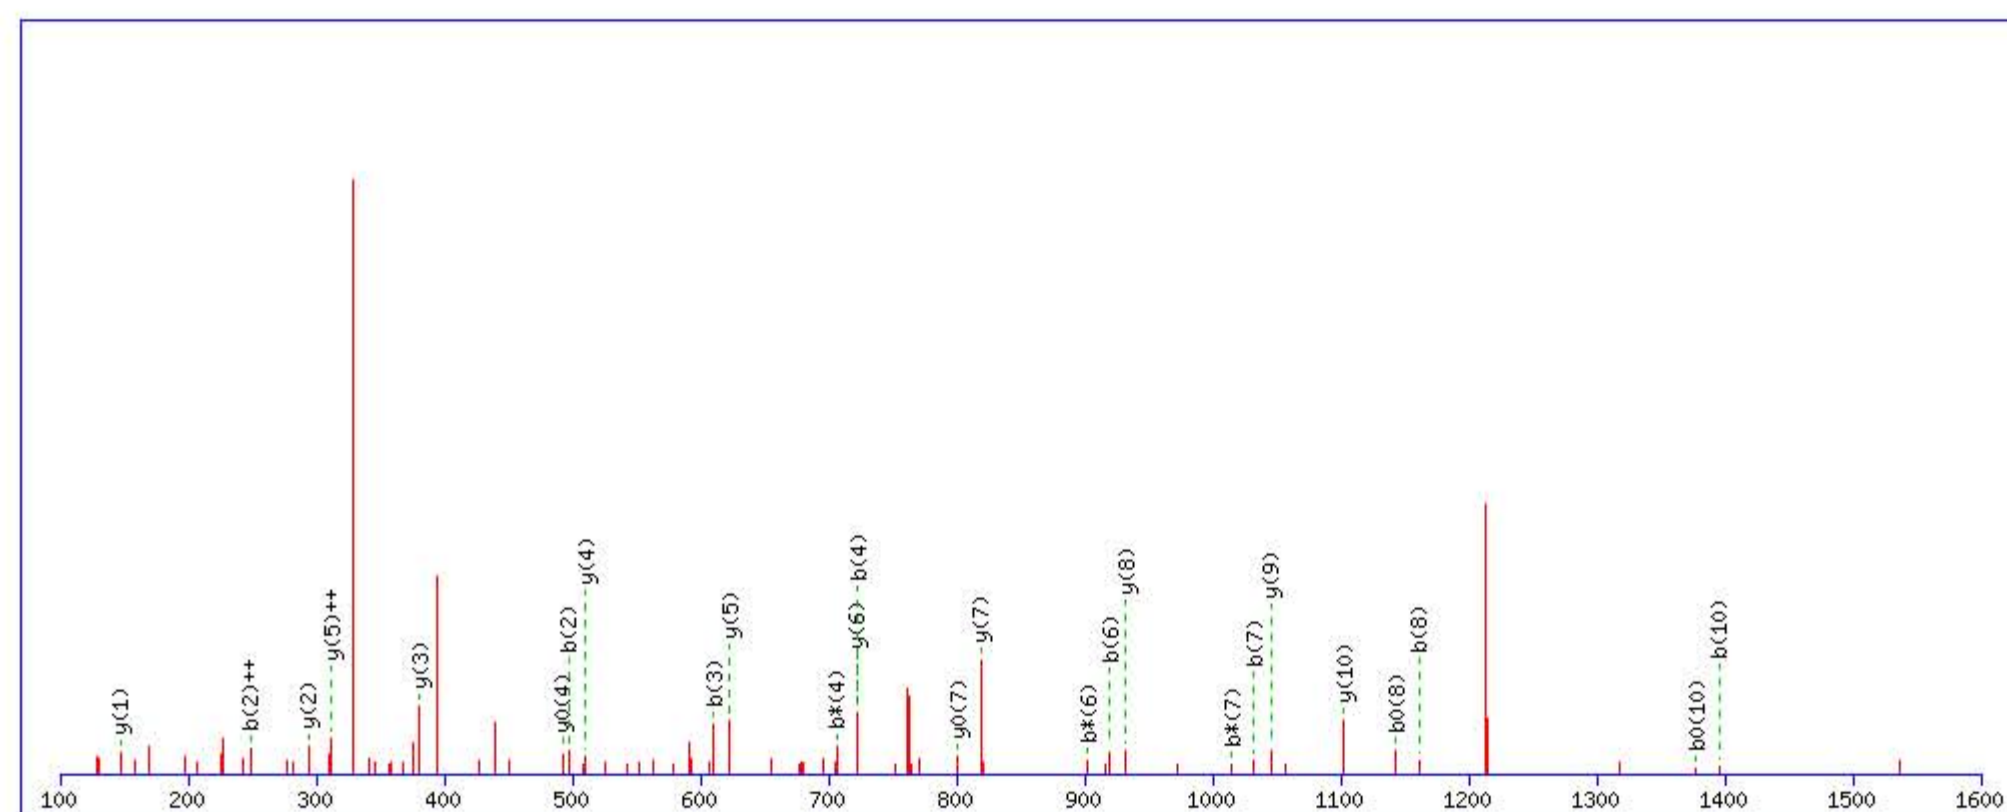

Monoisotopic mass of neutral peptide Mr(calc): 1540.868713

Fixed modifications: Carbamidomethyl (C) (apply to specified residues or termini only)

Variable modifications:

Q1 : Biotin:Thermo-21345 (Q)

Ions Score: 64 Expect: 3.4e-006

Matches : 26/102 fragment ions using 46 most intense peaks [\(help\)](#)

| #  | b           | b <sup>++</sup> | b <sup>*</sup> | b <sup>*++</sup> | b <sup>0</sup> | b <sup>0++</sup> | Seq. | y           | y <sup>++</sup> | y <sup>*</sup> | y <sup>*++</sup> | y <sup>0</sup> | y <sup>0++</sup> | #  |
|----|-------------|-----------------|----------------|------------------|----------------|------------------|------|-------------|-----------------|----------------|------------------|----------------|------------------|----|
| 1  | 440.232602  | 220.619939      | 423.206053     | 212.106664       |                |                  | Q    |             |                 |                |                  |                |                  | 11 |
| 2  | 497.254066  | 249.130671      | 480.227517     | 240.617396       |                |                  | G    | 1102.650673 | 551.828975      | 1085.624124    | 543.315700       | 1084.640108    | 542.823692       | 10 |
| 3  | 610.338130  | 305.672703      | 593.311581     | 297.159428       |                |                  | L    | 1045.629209 | 523.318243      | 1028.602660    | 514.804968       | 1027.618644    | 514.312960       | 9  |
| 4  | 723.422194  | 362.214735      | 706.395645     | 353.701461       |                |                  | L    | 932.545145  | 466.776211      | 915.518596     | 458.262936       | 914.534580     | 457.770928       | 8  |
| 5  | 820.474958  | 410.741117      | 803.448409     | 402.227843       |                |                  | P    | 819.461081  | 410.234179      | 802.434532     | 401.720904       | 801.450516     | 401.228896       | 7  |
| 6  | 919.543372  | 460.275324      | 902.516823     | 451.762049       |                |                  | V    | 722.408317  | 361.707797      | 705.381768     | 353.194522       | 704.397752     | 352.702514       | 6  |
| 7  | 1032.627436 | 516.817356      | 1015.600887    | 508.304082       |                |                  | L    | 623.339903  | 312.173590      | 606.313354     | 303.660315       | 605.329338     | 303.168307       | 5  |
| 8  | 1161.670029 | 581.338653      | 1144.643480    | 572.825378       | 1143.659464    | 572.333370       | E    | 510.255839  | 255.631558      | 493.229290     | 247.118283       | 492.245274     | 246.626275       | 4  |
| 9  | 1248.702057 | 624.854667      | 1231.675508    | 616.341392       | 1230.691492    | 615.849384       | S    | 381.213246  | 191.110261      | 364.186697     | 182.596987       | 363.202681     | 182.104979       | 3  |
| 10 | 1395.770471 | 698.388874      | 1378.743922    | 689.875599       | 1377.759906    | 689.383591       | F    | 294.181218  | 147.594247      | 277.154669     | 139.080973       |                |                  | 2  |
| 11 |             |                 |                |                  |                |                  | K    | 147.112804  | 74.060040       | 130.086255     | 65.546765        |                |                  | 1  |

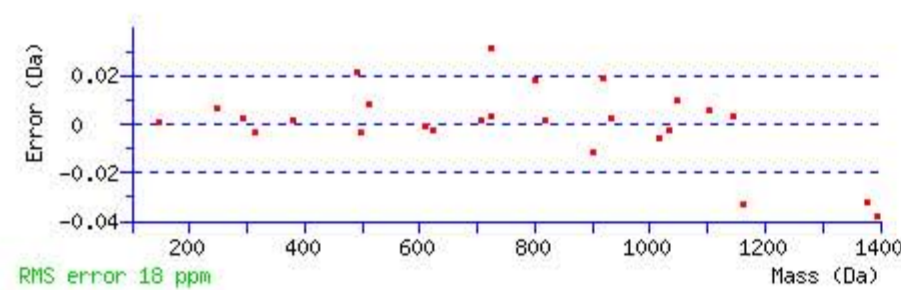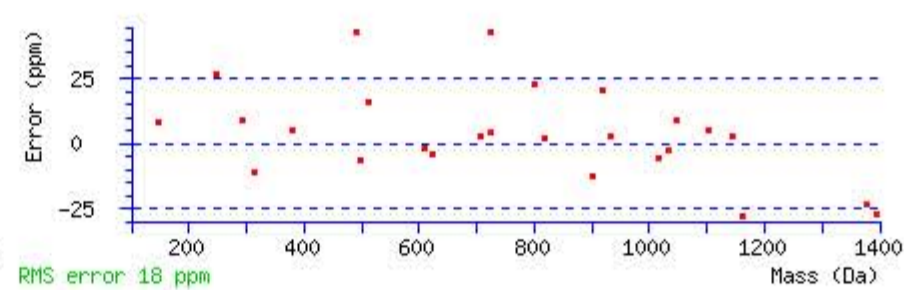

NCBI BLAST search of **QGLLPVLESFK**

(Parameters: blastp, nr protein database, expect=20000, no filter, PAM30)

Other BLAST [web gateways](#)

All matches to this query

| Score | Mr(calc):   | Delta     | Sequence                        |
|-------|-------------|-----------|---------------------------------|
| 63.6  | 1540.868713 | -0.001705 | <a href="#">QGLLPVLESFK</a>     |
| 4.9   | 1540.846054 | 0.020954  | <a href="#">ISQDADLKTPTKPK</a>  |
| 3.3   | 1540.872559 | -0.005551 | <a href="#">ELSRVLHTNVVFK</a>   |
| 1.3   | 1540.872574 | -0.005566 | <a href="#">LPVGGQLGARFPTTK</a> |
| 0.8   | 1540.858154 | 0.008854  | <a href="#">QGEVRLKCLK</a>      |
| 0.3   | 1540.864700 | 0.002308  | <a href="#">KVTVGKDDIQK</a>     |
| 0.3   | 1540.858139 | 0.008869  | <a href="#">LTNLR LQNMK</a>     |

# MASCOT Search Results

## Peptide View

MS/MS Fragmentation of **VQPYLDDDFQK**

Found in **APOA1\_HUMAN**, Apolipoprotein A-I OS=Homo sapiens GN=APOA1 PE=1 SV=1

Match to Query 28902: 1562.776368 from(782.395460,2+) rtinseconds(2196) index(33006)

Title: Locus:1.1.1.3428.10 File:"2013-07-02 CLN FXIII 180 min 3rd F 3.wiff"

Data file C:\Program Files (x86)\Matrix Science\Mascot Daemon\mgf9 FXIII 180 min 3rd\mascot\_daemon\_merge.mgf

Click mouse within plot area to zoom in by factor of two about that point

Or, Plot from  to  Da

Label all possible matches  Label matches used for scoring

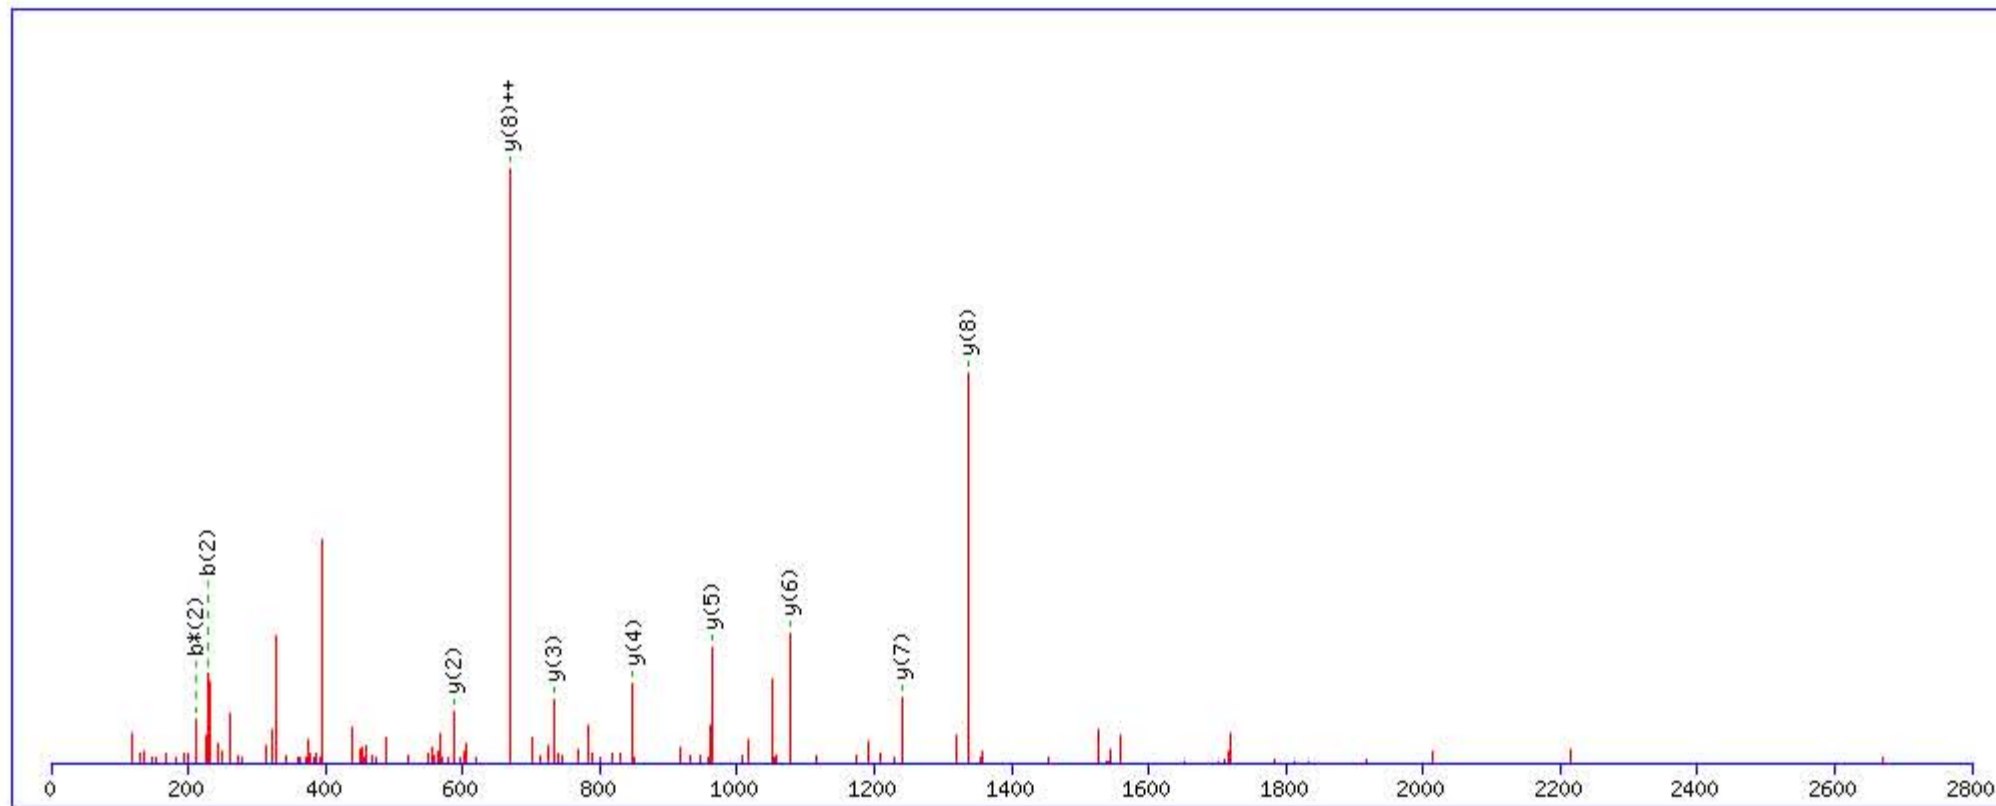

Monoisotopic mass of neutral peptide Mr(calc): 1562.780304

Fixed modifications: Carbamidomethyl (C) (apply to specified residues or termini only)

Variable modifications:

Q9 : Biotin:Thermo-21345 (Q)

Ions Score: 41 Expect: 0.00017

Matches : 10/90 fragment ions using 15 most intense peaks ([help](#))

| #  | b           | b <sup>++</sup> | b <sup>+</sup> | b <sup>*++</sup> | b <sup>0</sup> | b <sup>0++</sup> | Seq. | y           | y <sup>++</sup> | y <sup>+</sup> | y <sup>*++</sup> | y <sup>0</sup> | y <sup>0++</sup> | #  |
|----|-------------|-----------------|----------------|------------------|----------------|------------------|------|-------------|-----------------|----------------|------------------|----------------|------------------|----|
| 1  | 100.075690  | 50.541483       |                |                  |                |                  | V    |             |                 |                |                  |                |                  | 10 |
| 2  | 228.134268  | 114.570772      | 211.107719     | 106.057498       |                |                  | Q    | 1464.719165 | 732.863221      | 1447.692616    | 724.349946       | 1446.708600    | 723.857938       | 9  |
| 3  | 325.187032  | 163.097154      | 308.160483     | 154.583879       |                |                  | P    | 1336.660587 | 668.833932      | 1319.634038    | 660.320657       | 1318.650022    | 659.828649       | 8  |
| 4  | 488.250361  | 244.628818      | 471.223812     | 236.115544       |                |                  | Y    | 1239.607823 | 620.307550      | 1222.581274    | 611.794275       | 1221.597258    | 611.302267       | 7  |
| 5  | 601.334425  | 301.170851      | 584.307876     | 292.657576       |                |                  | L    | 1076.544494 | 538.775885      | 1059.517945    | 530.262611       | 1058.533929    | 529.770603       | 6  |
| 6  | 716.361368  | 358.684322      | 699.334819     | 350.171047       | 698.350803     | 349.679039       | D    | 963.460430  | 482.233853      | 946.433881     | 473.720579       | 945.449865     | 473.228571       | 5  |
| 7  | 831.388311  | 416.197793      | 814.361762     | 407.684519       | 813.377746     | 407.192511       | D    | 848.433487  | 424.720382      | 831.406938     | 416.207107       | 830.422922     | 415.715099       | 4  |
| 8  | 978.456725  | 489.732000      | 961.430176     | 481.218726       | 960.446160     | 480.726718       | F    | 733.406544  | 367.206910      | 716.379995     | 358.693636       |                |                  | 3  |
| 9  | 1417.682051 | 709.344664      | 1400.655502    | 700.831389       | 1399.671486    | 700.339381       | Q    | 586.338130  | 293.672703      | 569.311581     | 285.159429       |                |                  | 2  |
| 10 |             |                 |                |                  |                |                  | K    | 147.112804  | 74.060040       | 130.086255     | 65.546765        |                |                  | 1  |

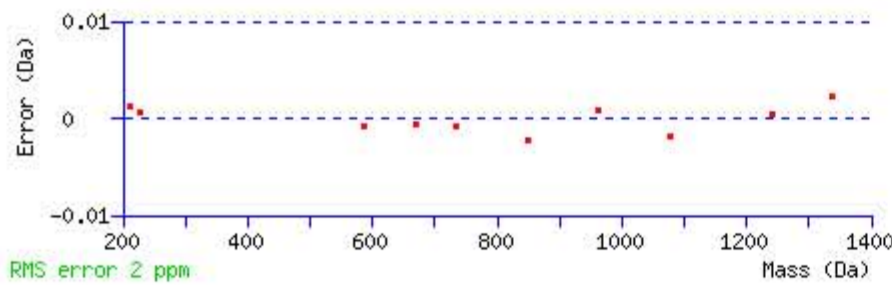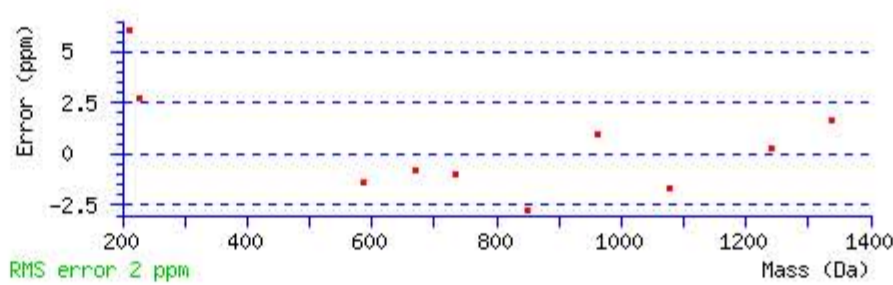

NCBI BLAST search of **VQPYLDDDFQK**

(Parameters: blastp, nr protein database, expect=20000, no filter, PAM30)

Other BLAST [web gateways](#)

All matches to this query

| Score | Mr(calc):   | Delta     | Sequence                       |
|-------|-------------|-----------|--------------------------------|
| 40.9  | 1562.780304 | -0.003936 | <a href="#">VQPYLDDDFQK</a>    |
| 0.7   | 1562.787521 | -0.011153 | <a href="#">VQLVDNVYCIGQR</a>  |
| 0.1   | 1562.768860 | 0.007508  | <a href="#">LNFGASLQQTAEER</a> |



# MASCOT Search Results

## Peptide View

MS/MS Fragmentation of **DYVSQFEGSALGK**

Found in **APOA1\_HUMAN**, Apolipoprotein A-I OS=Homo sapiens GN=APOA1 PE=1 SV=1

Match to Query 33854: 1710.833488 from(856.424020,2+) rtinseconds(2406) index(34128)

Title: Locus:1.1.1.3501.11 File:"2013-07-02 CLN FXIII 180 min 3rd F 3.wiff"

Data file C:\Program Files (x86)\Matrix Science\Mascot Daemon\mgf9 FXIII 180 min 3rd\mascot\_daemon\_merge.mgf

Click mouse within plot area to zoom in by factor of two about that point

Or, Plot from  to  Da

Label all possible matches  Label matches used for scoring

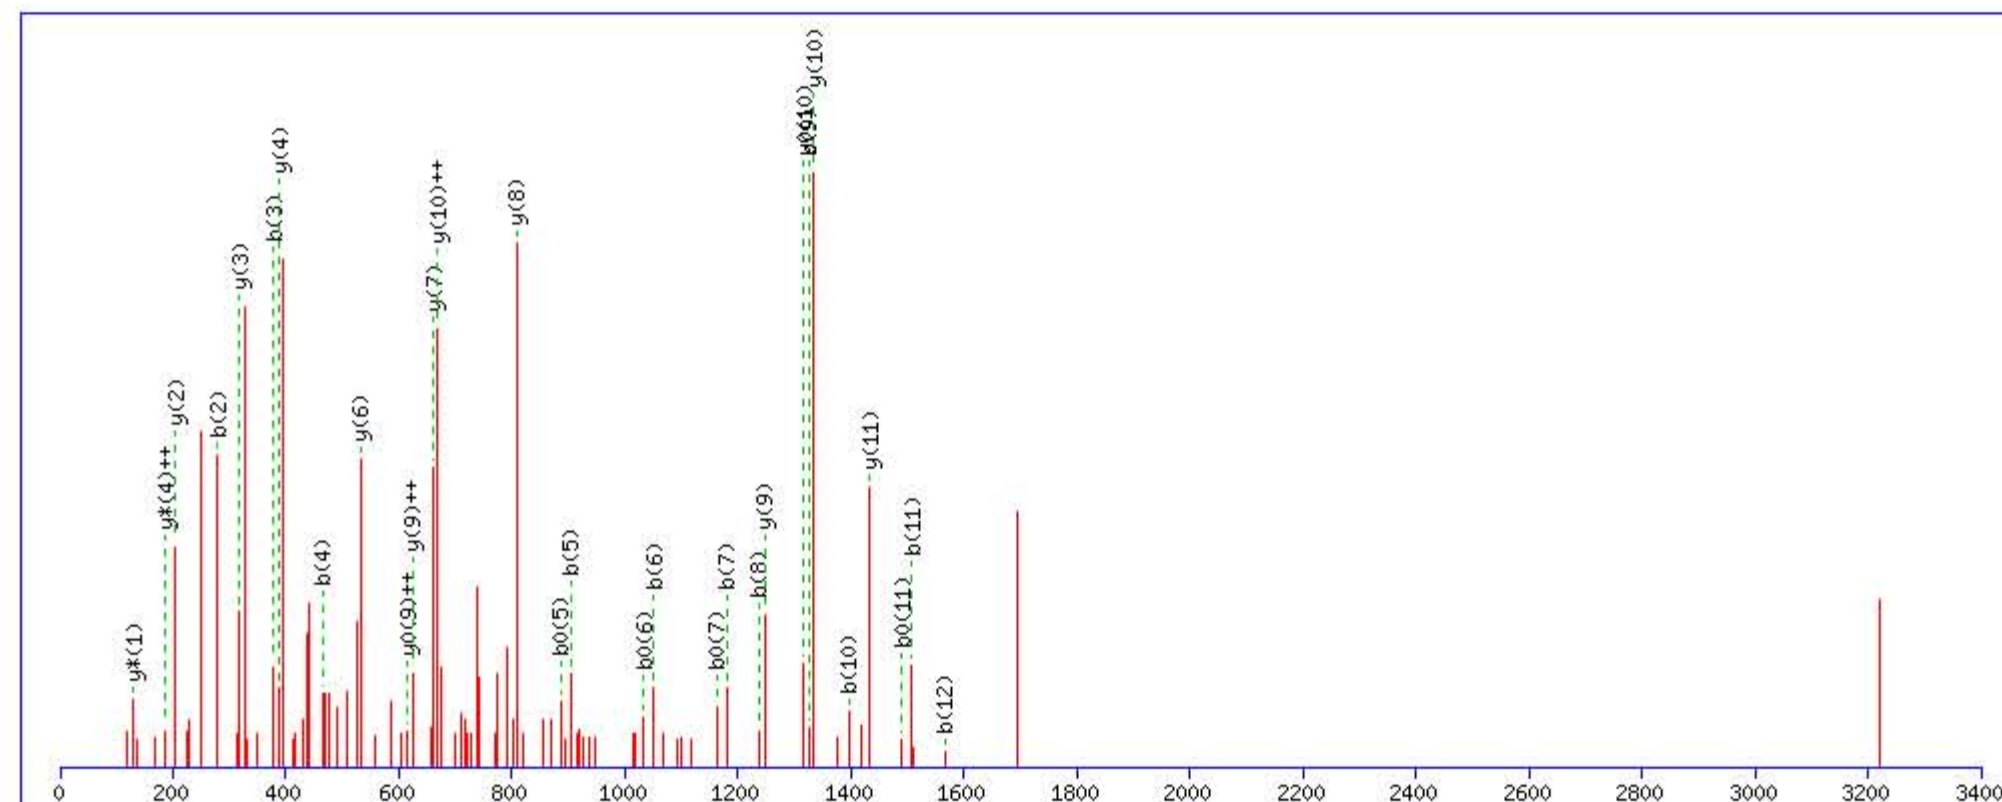

Monoisotopic mass of neutral peptide Mr(calc): 1710.828705

Fixed modifications: Carbamidomethyl (C) (apply to specified residues or termini only)

Variable modifications:

Q5 : Biotin:Thermo-21345 (Q)

Ions Score: 69 Expect: 5.5e-007

Matches : 30/128 fragment ions using 55 most intense peaks [\(help\)](#)

| #  | b                  | b <sup>++</sup> | b <sup>*</sup> | b <sup>+++</sup> | b <sup>0</sup>     | b <sup>0++</sup> | Seq. | y                  | y <sup>++</sup>   | y <sup>*</sup>    | y <sup>+++</sup>  | y <sup>0</sup>     | y <sup>0++</sup>  | #  |
|----|--------------------|-----------------|----------------|------------------|--------------------|------------------|------|--------------------|-------------------|-------------------|-------------------|--------------------|-------------------|----|
| 1  | 116.034219         | 58.520748       |                |                  | 98.023654          | 49.515465        | D    |                    |                   |                   |                   |                    |                   | 13 |
| 2  | <b>279.097548</b>  | 140.052412      |                |                  | 261.086983         | 131.047130       | Y    | 1596.809042        | 798.908159        | 1579.782493       | 790.394884        | 1578.798477        | 789.902876        | 12 |
| 3  | <b>378.165962</b>  | 189.586619      |                |                  | 360.155397         | 180.581337       | V    | <b>1433.745713</b> | 717.376495        | 1416.719164       | 708.863220        | 1415.735148        | 708.371212        | 11 |
| 4  | <b>465.197990</b>  | 233.102633      |                |                  | 447.187425         | 224.097351       | S    | <b>1334.677299</b> | <b>667.842288</b> | 1317.650750       | 659.329013        | <b>1316.666734</b> | 658.837005        | 10 |
| 5  | <b>904.423316</b>  | 452.715296      | 887.396767     | 444.202022       | <b>886.412751</b>  | 443.710014       | Q    | <b>1247.645271</b> | <b>624.326273</b> | 1230.618722       | 615.812999        | 1229.634706        | <b>615.320991</b> | 9  |
| 6  | <b>1051.491730</b> | 526.249503      | 1034.465181    | 517.736229       | <b>1033.481165</b> | 517.244221       | F    | <b>808.419945</b>  | 404.713610        | 791.393396        | 396.200336        | 790.409380         | 395.708328        | 8  |
| 7  | <b>1180.534323</b> | 590.770800      | 1163.507774    | 582.257525       | <b>1162.523758</b> | 581.765517       | E    | <b>661.351531</b>  | 331.179403        | 644.324982        | 322.666129        | 643.340966         | 322.174121        | 7  |
| 8  | <b>1237.555787</b> | 619.281532      | 1220.529238    | 610.768257       | 1219.545222        | 610.276249       | G    | <b>532.308938</b>  | 266.658107        | 515.282389        | 258.144832        | 514.298373         | 257.652824        | 6  |
| 9  | <b>1324.587815</b> | 662.797546      | 1307.561266    | 654.284271       | 1306.577250        | 653.792263       | S    | 475.287474         | 238.147375        | 458.260925        | 229.634100        | 457.276909         | 229.142092        | 5  |
| 10 | <b>1395.624929</b> | 698.316103      | 1378.598380    | 689.802828       | 1377.614364        | 689.310820       | A    | <b>388.255446</b>  | 194.631361        | 371.228897        | <b>186.118086</b> |                    |                   | 4  |
| 11 | <b>1508.708993</b> | 754.858135      | 1491.682444    | 746.344860       | <b>1490.698428</b> | 745.852852       | L    | <b>317.218332</b>  | 159.112804        | 300.191783        | 150.599529        |                    |                   | 3  |
| 12 | <b>1565.730457</b> | 783.368866      | 1548.703908    | 774.855592       | 1547.719892        | 774.363584       | G    | <b>204.134268</b>  | 102.570772        | 187.107719        | 94.057497         |                    |                   | 2  |
| 13 |                    |                 |                |                  |                    |                  | K    | 147.112804         | 74.060040         | <b>130.086255</b> | 65.546765         |                    |                   | 1  |

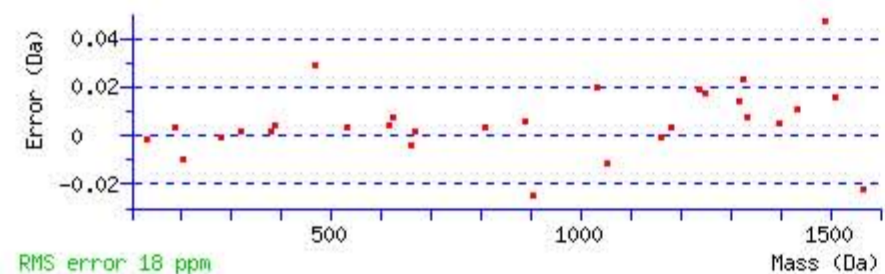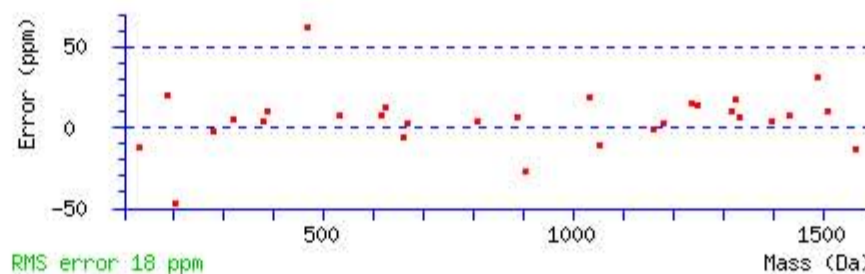

NCBI BLAST search of **DYVSQFEGSALGK**

(Parameters: blastp, nr protein database, expect=20000, no filter, PAM30)

Other BLAST [web gateways](#)

All matches to this query

| Score | Mr(calc):   | Delta     | Sequence                         |
|-------|-------------|-----------|----------------------------------|
| 68.9  | 1710.828705 | 0.004783  | <a href="#">DYVSQFEGSALGK</a>    |
| 2.1   | 1710.835907 | -0.002419 | <a href="#">ASRKGSFGEMGEQTVK</a> |

Mascot: <http://www.matrixscience.com/>

# MASCOT SEARCH RESULTS

## Peptide View

MS/MS Fragmentation of **EQLTPLIK**

Found in **APOA2\_HUMAN**, Apolipoprotein A-II OS=Homo sapiens GN=APOA2 PE=1 SV=1

Match to Query 19084: 1251.728548 from(626.871550,2+) rtinseconds(2140) index(19848)

Title: Locus:1.1.1.3311.5 File:"2013-07-02 CLN FXIII 180 min 3rd F 2.wiff"

Data file C:\Program Files (x86)\Matrix Science\Mascot Daemon\mgf\9 FXIII 180 min 3rd\mascot\_daemon\_merge.mgf

Click mouse within plot area to zoom in by factor of two about that point

Or, Plot from  to  Da

Label all possible matches  Label matches used for scoring

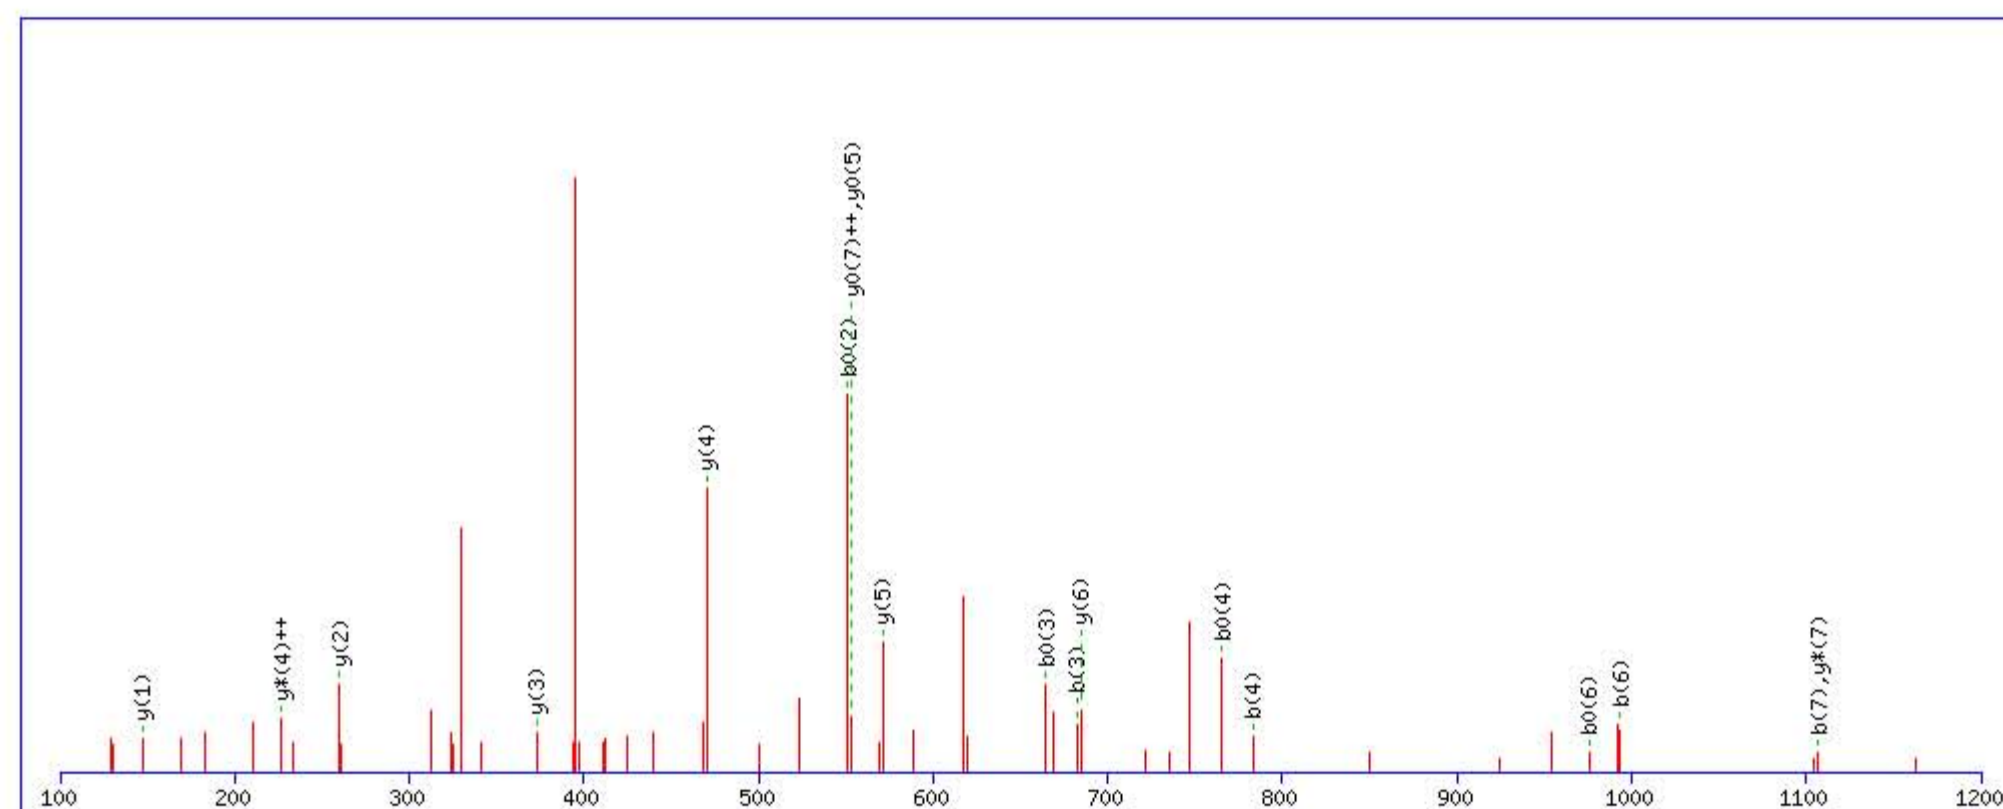

Monoisotopic mass of neutral peptide Mr(calc): 1251.726059

Fixed modifications: Carbamidomethyl (C) (apply to specified residues or termini only)

Variable modifications:

Q2 : Biotin:Thermo-21345 (Q)

Ions Score: 26 Expect: 0.013

Matches : 18/74 fragment ions using 37 most intense peaks [\(help\)](#)

| # | b           | b <sup>++</sup> | b <sup>*</sup> | b <sup>*++</sup> | b <sup>0</sup> | b <sup>0++</sup> | Seq. | y           | y <sup>++</sup> | y <sup>*</sup> | y <sup>*++</sup> | y <sup>0</sup> | y <sup>0++</sup> | # |
|---|-------------|-----------------|----------------|------------------|----------------|------------------|------|-------------|-----------------|----------------|------------------|----------------|------------------|---|
| 1 | 130.049869  | 65.528572       |                |                  | 112.039304     | 56.523290        | E    |             |                 |                |                  |                |                  | 8 |
| 2 | 569.275195  | 285.141236      | 552.248646     | 276.627961       | 551.264630     | 276.135953       | Q    | 1123.690765 | 562.349021      | 1106.664216    | 553.835746       | 1105.680200    | 553.343738       | 7 |
| 3 | 682.359259  | 341.683268      | 665.332710     | 333.169993       | 664.348694     | 332.677985       | L    | 684.465439  | 342.736358      | 667.438890     | 334.223083       | 666.454874     | 333.731075       | 6 |
| 4 | 783.406938  | 392.207107      | 766.380389     | 383.693833       | 765.396373     | 383.201825       | T    | 571.381375  | 286.194326      | 554.354826     | 277.681051       | 553.370810     | 277.189043       | 5 |
| 5 | 880.459702  | 440.733489      | 863.433153     | 432.220215       | 862.449137     | 431.728207       | P    | 470.333696  | 235.670486      | 453.307147     | 227.157212       |                |                  | 4 |
| 6 | 993.543766  | 497.275521      | 976.517217     | 488.762247       | 975.533201     | 488.270239       | L    | 373.280932  | 187.144104      | 356.254383     | 178.630830       |                |                  | 3 |
| 7 | 1106.627830 | 553.817553      | 1089.601281    | 545.304279       | 1088.617265    | 544.812271       | I    | 260.196868  | 130.602072      | 243.170319     | 122.088798       |                |                  | 2 |
| 8 |             |                 |                |                  |                |                  | K    | 147.112804  | 74.060040       | 130.086255     | 65.546765        |                |                  | 1 |

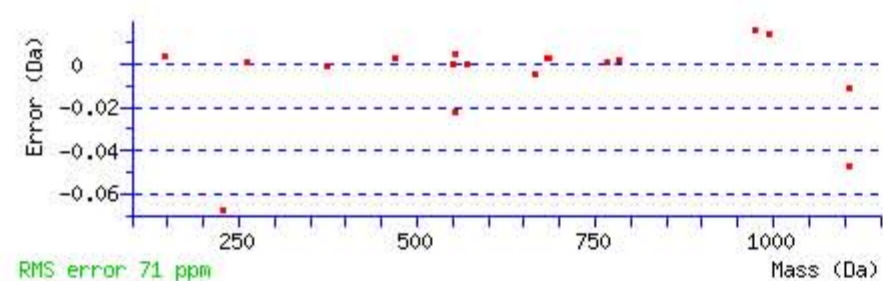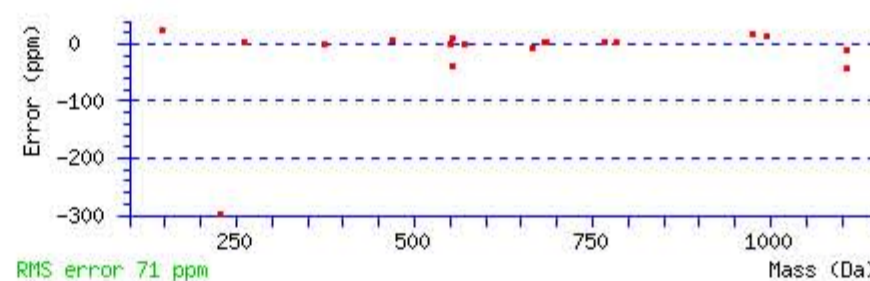

NCBI BLAST search of **EQLTPLIK**

(Parameters: blastp, nr protein database, expect=20000, no filter, PAM30)

Other BLAST [web gateways](#)

All matches to this query

| Score | Mr(calc):   | Delta     | Sequence                   |
|-------|-------------|-----------|----------------------------|
| 26.4  | 1251.726059 | 0.002489  | <a href="#">EQLTPLIK</a>   |
| 6.2   | 1251.744690 | -0.016142 | <a href="#">QMLPIVLK</a>   |
| 3.4   | 1251.722702 | 0.005846  | <a href="#">FFKTLQDLLK</a> |
| 2.3   | 1251.722672 | 0.005876  | <a href="#">NYIPYLTKLK</a> |
| 1.8   | 1251.733932 | -0.005384 | <a href="#">LPVIQLWDLR</a> |
| 1.6   | 1251.729874 | -0.001326 | <a href="#">RHKLESELIK</a> |

# MASCOT Search Results

## Peptide View

MS/MS Fragmentation of **SPELQAEAK**

Found in **APOA2\_HUMAN**, Apolipoprotein A-II OS=Homo sapiens GN=APOA2 PE=1 SV=1

Match to Query 19976: 1282.654248 from(642.334400,2+) rtinseconds(1601) index(16515)

Title: Locus:1.1.1.3123.13 File:"2013-07-02 CLN FXIII 180 min 3rd F 2.wiff"

Data file C:\Program Files (x86)\Matrix Science\Mascot Daemon\mgf9 FXIII 180 min 3rd\mascot\_daemon\_merge.mgf

Click mouse within plot area to zoom in by factor of two about that point

Or, Plot from  to  Da

Label all possible matches  Label matches used for scoring

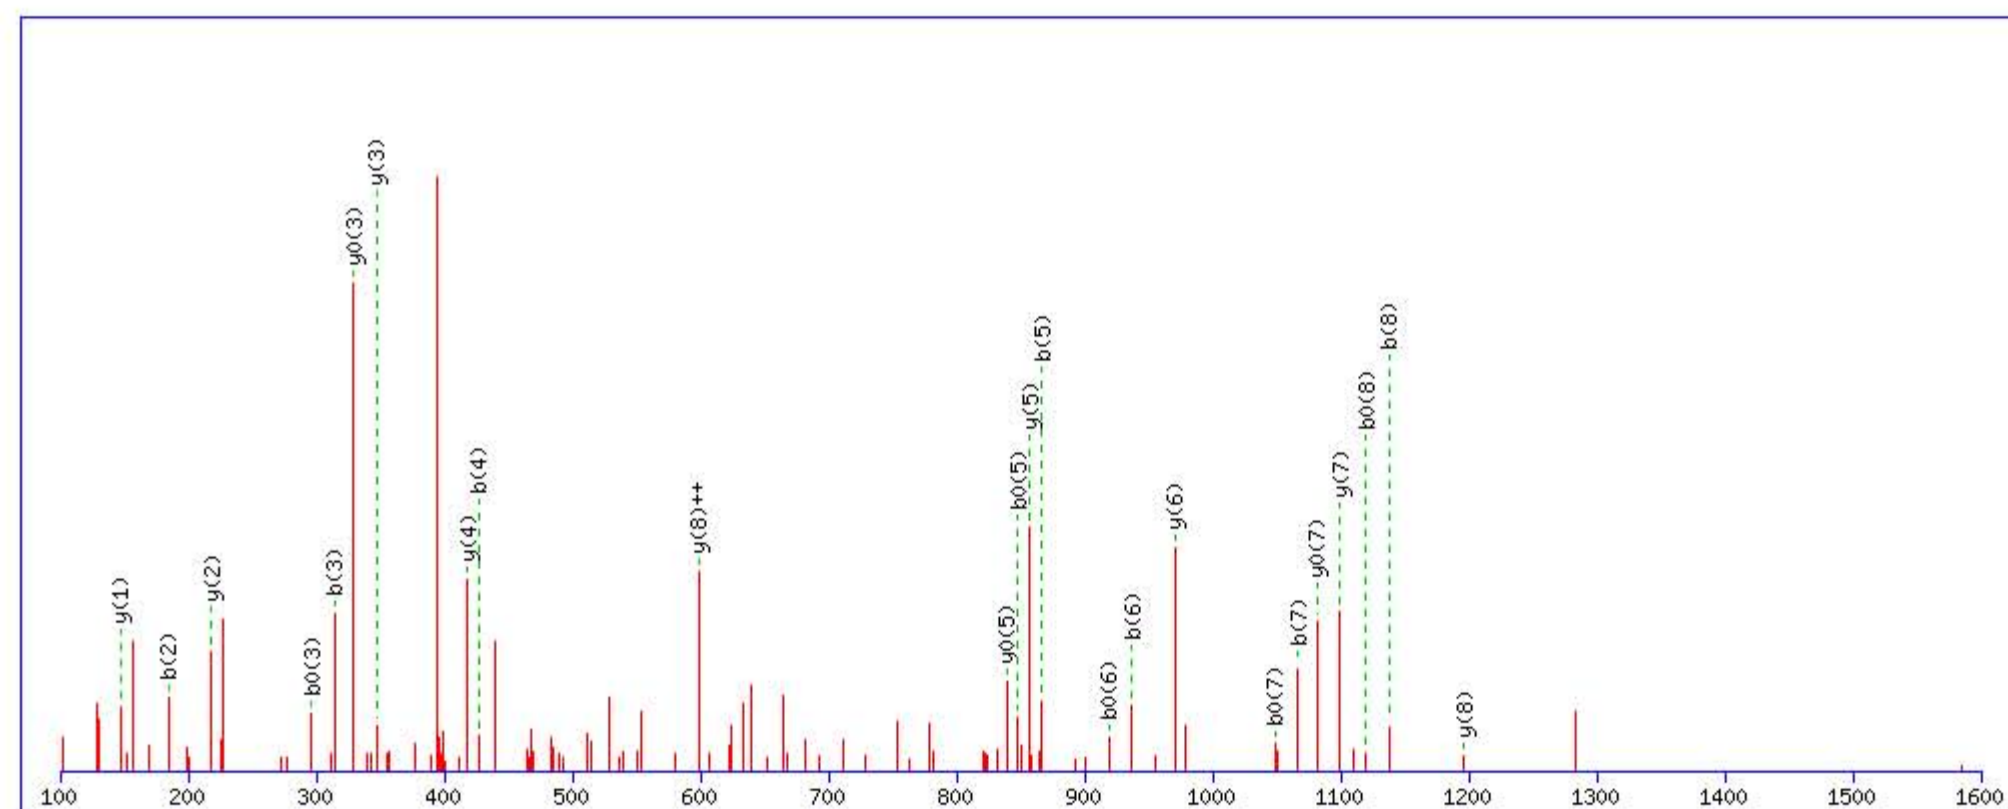

Monoisotopic mass of neutral peptide Mr(calc): 1282.659088

Fixed modifications: Carbamidomethyl (C) (apply to specified residues or termini only)

Variable modifications:

Q5 : Biotin:Thermo-21345 (Q)

Ions Score: 49 Expect: 6.3e-005

Matches : 24/84 fragment ions using 44 most intense peaks [\(help\)](#)

| # | b           | b <sup>++</sup> | b <sup>*</sup> | b <sup>+++</sup> | b <sup>0</sup> | b <sup>0++</sup> | Seq. | y           | y <sup>++</sup> | y <sup>*</sup> | y <sup>+++</sup> | y <sup>0</sup> | y <sup>0++</sup> | # |
|---|-------------|-----------------|----------------|------------------|----------------|------------------|------|-------------|-----------------|----------------|------------------|----------------|------------------|---|
| 1 | 88.039304   | 44.523290       |                |                  | 70.028739      | 35.518008        | S    |             |                 |                |                  |                |                  | 9 |
| 2 | 185.092068  | 93.049672       |                |                  | 167.081503     | 84.044389        | P    | 1196.634372 | 598.820824      | 1179.607823    | 590.307550       | 1178.623807    | 589.815541       | 8 |
| 3 | 314.134661  | 157.570968      |                |                  | 296.124096     | 148.565686       | E    | 1099.581608 | 550.294442      | 1082.555059    | 541.781168       | 1081.571043    | 541.289160       | 7 |
| 4 | 427.218725  | 214.113001      |                |                  | 409.208160     | 205.107718       | L    | 970.539015  | 485.773146      | 953.512466     | 477.259871       | 952.528450     | 476.767863       | 6 |
| 5 | 866.444051  | 433.725664      | 849.417502     | 425.212389       | 848.433486     | 424.720381       | Q    | 857.454951  | 429.231114      | 840.428402     | 420.717839       | 839.444386     | 420.225831       | 5 |
| 6 | 937.481165  | 469.244221      | 920.454616     | 460.730946       | 919.470600     | 460.238938       | A    | 418.229625  | 209.618450      | 401.203076     | 201.105176       | 400.219060     | 200.613168       | 4 |
| 7 | 1066.523758 | 533.765517      | 1049.497209    | 525.252243       | 1048.513193    | 524.760235       | E    | 347.192511  | 174.099893      | 330.165962     | 165.586619       | 329.181946     | 165.094611       | 3 |
| 8 | 1137.560872 | 569.284074      | 1120.534323    | 560.770800       | 1119.550307    | 560.278792       | A    | 218.149918  | 109.578597      | 201.123369     | 101.065322       |                |                  | 2 |
| 9 |             |                 |                |                  |                |                  | K    | 147.112804  | 74.060040       | 130.086255     | 65.546765        |                |                  | 1 |

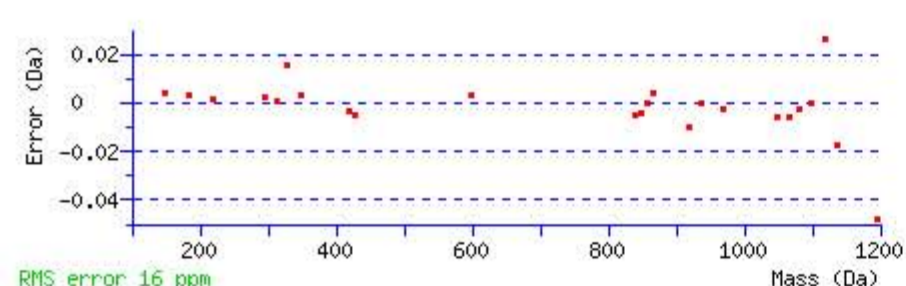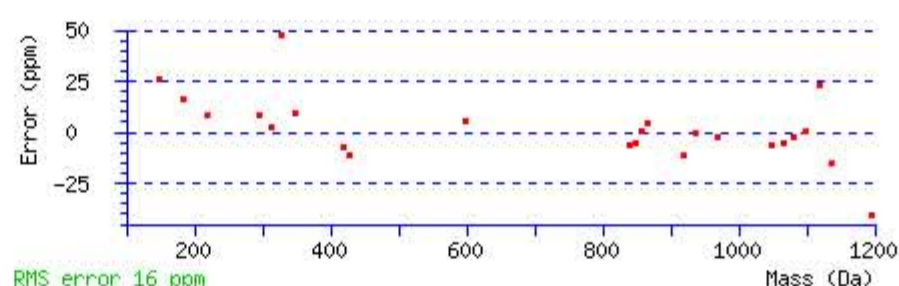

NCBI BLAST search of [SPELQAEAK](#)

(Parameters: blastp, nr protein database, expect=20000, no filter, PAM30)

Other BLAST [web gateways](#)

## All matches to this query

| Score | Mr(calc):   | Delta     | Sequence                     |
|-------|-------------|-----------|------------------------------|
| 49.1  | 1282.659088 | -0.004840 | <a href="#">SPELQAEAK</a>    |
| 4.1   | 1282.670334 | -0.016086 | <a href="#">EPIQASTAR</a>    |
| 3.9   | 1282.637802 | 0.016446  | <a href="#">KGHETLRDGR</a>   |
| 3.6   | 1282.641830 | 0.012418  | <a href="#">SYPGHVQPATAR</a> |
| 3.4   | 1282.641815 | 0.012433  | <a href="#">SEAFFRKADGR</a>  |
| 2.9   | 1282.662949 | -0.008701 | <a href="#">DLSDTQRHLAK</a>  |
| 2.7   | 1282.655716 | -0.001468 | <a href="#">ALEAEKYGFQK</a>  |
| 1.5   | 1282.670334 | -0.016086 | <a href="#">QQQEQIAK</a>     |
| 1.1   | 1282.652573 | 0.001675  | <a href="#">KMRAISWTMK</a>   |

# Mascot Search Results

## Peptide View

MS/MS Fragmentation of **EPCVESLVSQYFQTVTDYGK**

Found in **APOA2\_HUMAN**, Apolipoprotein A-II OS=Homo sapiens GN=APOA2 PE=1 SV=1

Match to Query 50012: 2660.247612 from(887.756480,3+) rtinseconds(3167) index(39146)

Title: Locus:1.1.1.3762.20 File:"2013-07-02 CLN FXIII 180 min 3rd F 3.wiff"

Data file C:\Program Files (x86)\Matrix Science\Mascot Daemon\mgf9 FXIII 180 min 3rd\mascot\_daemon\_merge.mgf

Click mouse within plot area to zoom in by factor of two about that point

Or, Plot from  to  Da

Label all possible matches  Label matches used for scoring

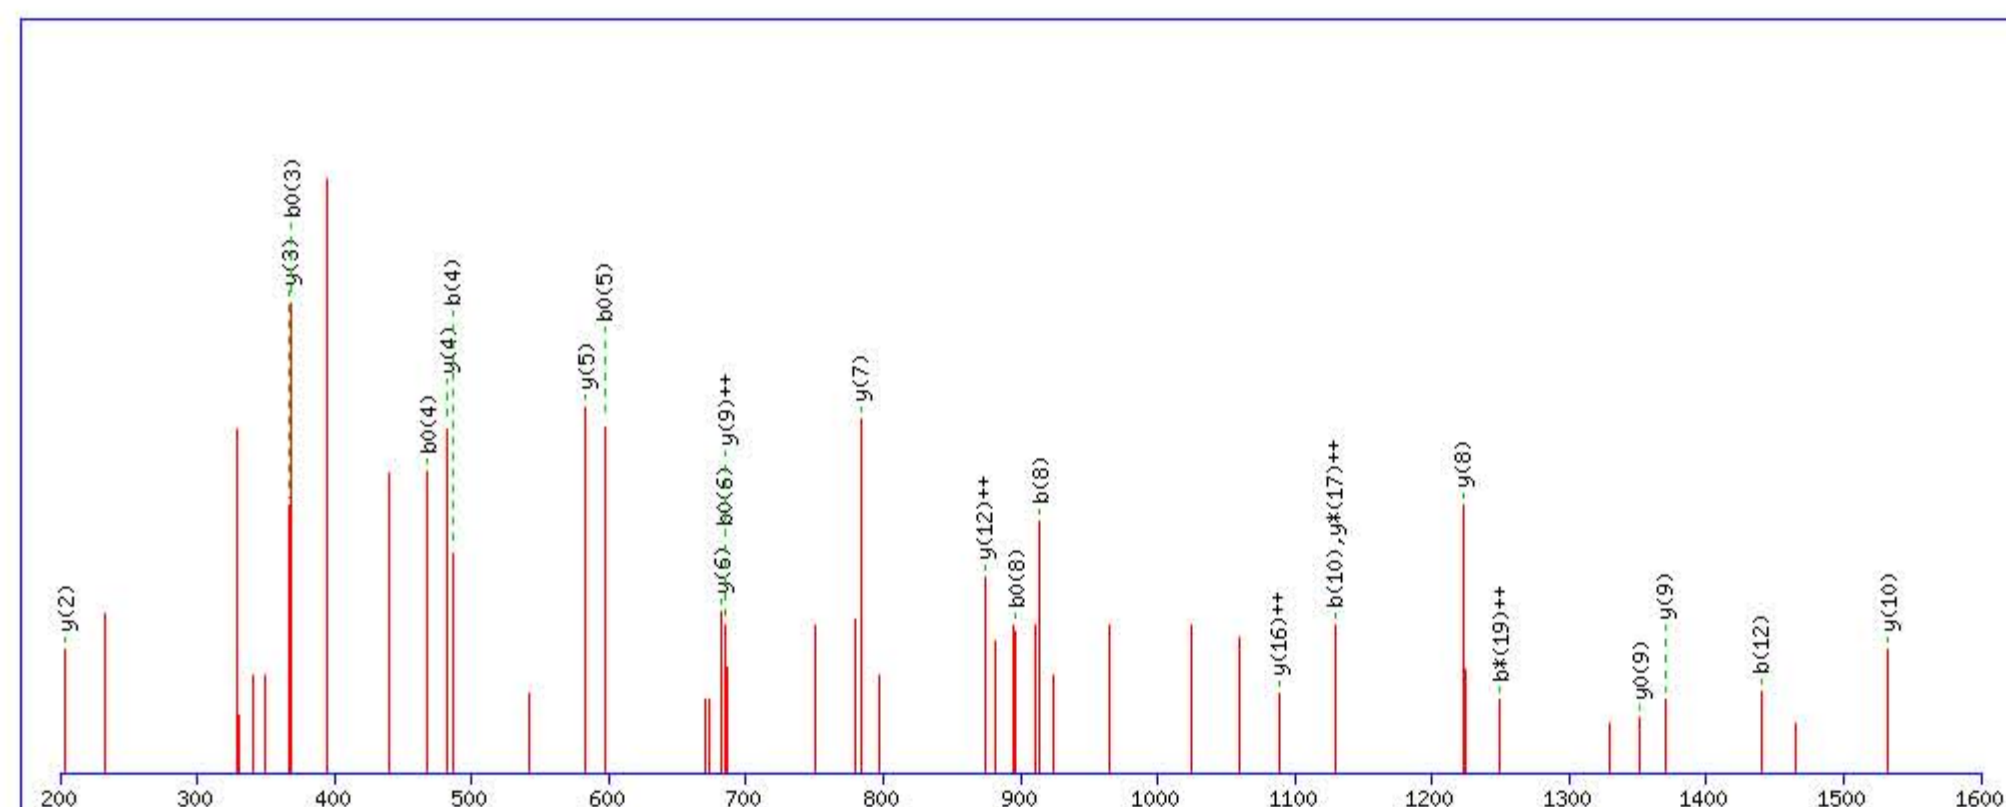

Monoisotopic mass of neutral peptide Mr(calc): 2660.250244

Fixed modifications: Carbamidomethyl (C) (apply to specified residues or termini only)

Variable modifications:

Q13 : Biotin:Thermo-21345 (Q)

Ions Score: 40 Expect: 0.0021

Matches : 24/204 fragment ions using 45 most intense peaks [\(help\)](#)

| #  | b           | b <sup>++</sup> | b <sup>*</sup> | b <sup>*++</sup> | b <sup>0</sup> | b <sup>0++</sup> | Seq. | y           | y <sup>++</sup> | y <sup>*</sup> | y <sup>*++</sup> | y <sup>0</sup> | y <sup>0++</sup> | #  |
|----|-------------|-----------------|----------------|------------------|----------------|------------------|------|-------------|-----------------|----------------|------------------|----------------|------------------|----|
| 1  | 130.049869  | 65.528572       |                |                  | 112.039304     | 56.523290        | E    |             |                 |                |                  |                |                  | 20 |
| 2  | 227.102633  | 114.054954      |                |                  | 209.092068     | 105.049672       | P    | 2532.214913 | 1266.611094     | 2515.188364    | 1258.097820      | 2514.204348    | 1257.605812      | 19 |
| 3  | 387.133282  | 194.070279      |                |                  | 369.122717     | 185.064997       | C    | 2435.162149 | 1218.084712     | 2418.135600    | 1209.571438      | 2417.151584    | 1209.079430      | 18 |
| 4  | 486.201696  | 243.604486      |                |                  | 468.191131     | 234.599204       | V    | 2275.131500 | 1138.069388     | 2258.104951    | 1129.556113      | 2257.120935    | 1129.064105      | 17 |
| 5  | 615.244289  | 308.125783      |                |                  | 597.233724     | 299.120500       | E    | 2176.063086 | 1088.535181     | 2159.036537    | 1080.021906      | 2158.052521    | 1079.529898      | 16 |
| 6  | 702.276317  | 351.641797      |                |                  | 684.265752     | 342.636514       | S    | 2047.020493 | 1024.013885     | 2029.993944    | 1015.500610      | 2029.009928    | 1015.008602      | 15 |
| 7  | 815.360381  | 408.183829      |                |                  | 797.349816     | 399.178546       | L    | 1959.988465 | 980.497871      | 1942.961916    | 971.984596       | 1941.977900    | 971.492588       | 14 |
| 8  | 914.428795  | 457.718036      |                |                  | 896.418230     | 448.712753       | V    | 1846.904401 | 923.955839      | 1829.877852    | 915.442564       | 1828.893836    | 914.950556       | 13 |
| 9  | 1001.460823 | 501.234050      |                |                  | 983.450258     | 492.228767       | S    | 1747.835987 | 874.421632      | 1730.809438    | 865.908357       | 1729.825422    | 865.416349       | 12 |
| 10 | 1129.519401 | 565.263339      | 1112.492852    | 556.750064       | 1111.508836    | 556.258056       | Q    | 1660.803959 | 830.905618      | 1643.777410    | 822.392343       | 1642.793394    | 821.900335       | 11 |
| 11 | 1292.582730 | 646.795003      | 1275.556181    | 638.281729       | 1274.572165    | 637.789721       | Y    | 1532.745381 | 766.876329      | 1515.718832    | 758.363054       | 1514.734816    | 757.871046       | 10 |
| 12 | 1439.651144 | 720.329210      | 1422.624595    | 711.815936       | 1421.640579    | 711.323928       | F    | 1369.682052 | 685.344664      | 1352.655503    | 676.831390       | 1351.671487    | 676.339382       | 9  |
| 13 | 1878.876470 | 939.941873      | 1861.849921    | 931.428599       | 1860.865905    | 930.936591       | Q    | 1222.613638 | 611.810457      | 1205.587089    | 603.297183       | 1204.603073    | 602.805175       | 8  |
| 14 | 1979.924149 | 990.465713      | 1962.897600    | 981.952438       | 1961.913584    | 981.460430       | T    | 783.388312  | 392.197794      | 766.361763     | 383.684519       | 765.377747     | 383.192511       | 7  |
| 15 | 2078.992563 | 1039.999920     | 2061.966014    | 1031.486645      | 2060.981998    | 1030.994637      | V    | 682.340633  | 341.673954      | 665.314084     | 333.160680       | 664.330068     | 332.668672       | 6  |
| 16 | 2180.040242 | 1090.523759     | 2163.013693    | 1082.010484      | 2162.029677    | 1081.518476      | T    | 583.272219  | 292.139747      | 566.245670     | 283.626473       | 565.261654     | 283.134465       | 5  |
| 17 | 2295.067185 | 1148.037230     | 2278.040636    | 1139.523956      | 2277.056620    | 1139.031948      | D    | 482.224540  | 241.615908      | 465.197991     | 233.102633       | 464.213975     | 232.610625       | 4  |
| 18 | 2458.130514 | 1229.568895     | 2441.103965    | 1221.055620      | 2440.119949    | 1220.563612      | Y    | 367.197597  | 184.102436      | 350.171048     | 175.589162       |                |                  | 3  |
| 19 | 2515.151978 | 1258.079627     | 2498.125429    | 1249.566352      | 2497.141413    | 1249.074344      | G    | 204.134268  | 102.570772      | 187.107719     | 94.057497        |                |                  | 2  |
| 20 |             |                 |                |                  |                |                  | K    | 147.112804  | 74.060040       | 130.086255     | 65.546765        |                |                  | 1  |

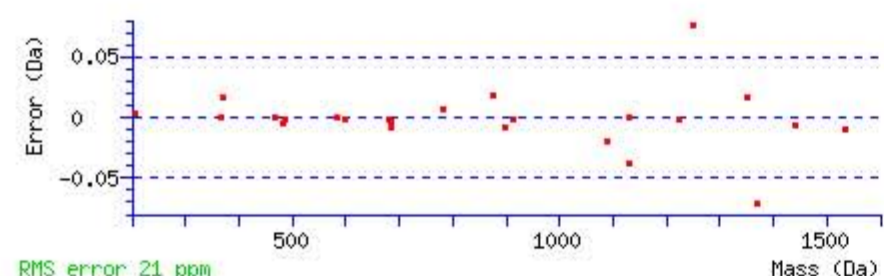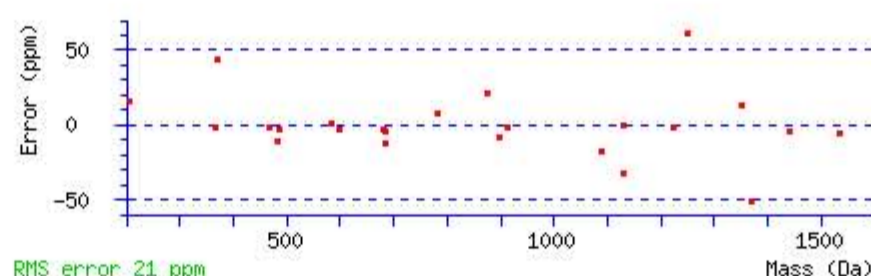

NCBI BLAST search of [EPCVESLVSQYFQTVTDYGK](#)

(Parameters: blastp, nr protein database, expect=20000, no filter, PAM30)

Other BLAST [web gateways](#)

All matches to this query

| Score | Mr(calc):   | Delta     | Sequence                             |
|-------|-------------|-----------|--------------------------------------|
| 39.8  | 2660.250244 | -0.002632 | <a href="#">EPCVESLVSQYFQTVTDYGK</a> |
| 23.5  | 2660.250244 | -0.002632 | <a href="#">EPCVESLVSQYFQTVTDYGK</a> |



# {MATRIX} {SCIENCE} Mascot Search Results

## Peptide View

MS/MS Fragmentation of **EIQQR**

Found in **T161A\_HUMAN**, Transmembrane protein 161A OS=Homo sapiens GN=TMEM161A PE=2 SV=1

Match to Query 11195: 983.516348 from(492.765450,2+) rtinseconds(1418) index(28361)

Title: Locus:1.1.1.3157.5 File:"2013-07-02 CLN FXIII 180 min 3rd F 3.wiff"

Data file C:\Program Files (x86)\Matrix Science\Mascot Daemon\mgf\9 FXIII 180 min 3rd\mascot\_daemon\_merge.mgf

Click mouse within plot area to zoom in by factor of two about that point

Or, Plot from  to  Da

Label all possible matches  Label matches used for scoring

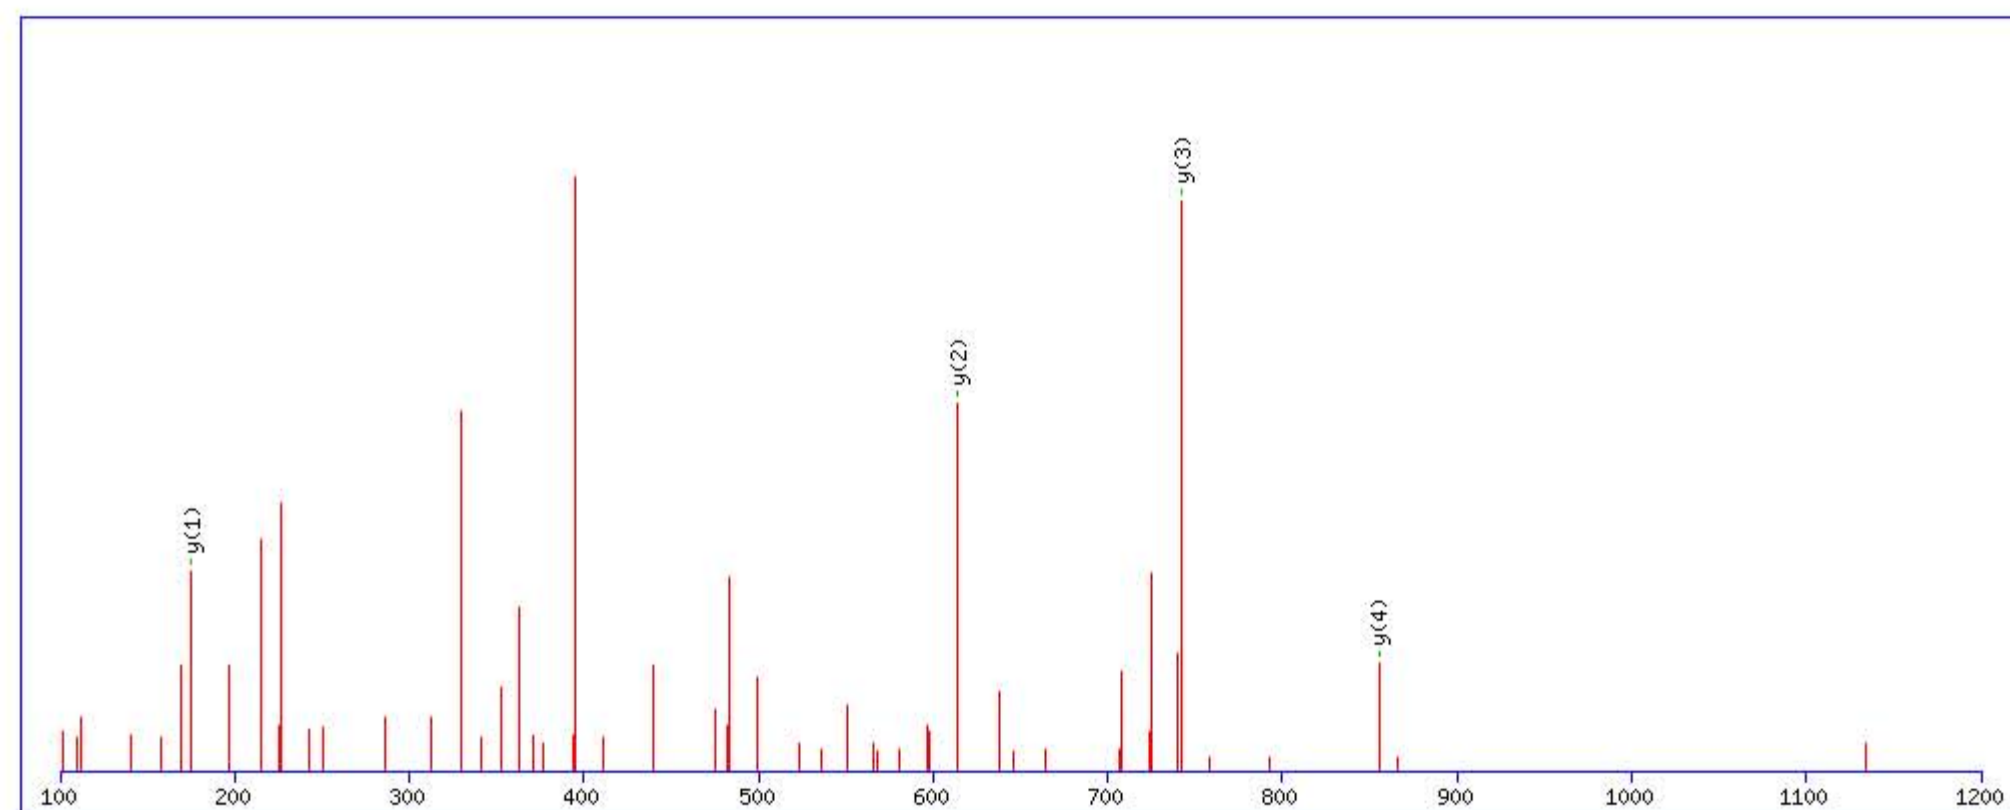

Monoisotopic mass of neutral peptide Mr(calc): 983.522217

Fixed modifications: Carbamidomethyl (C) (apply to specified residues or termini only)

Variable modifications:

Q4 : Biotin:Thermo-21345 (Q)

Ions Score: 25 Expect: 0.062

Matches : 4/36 fragment ions using 8 most intense peaks [\(help\)](#)

| # | b          | b <sup>++</sup> | b <sup>*</sup> | b <sup>*++</sup> | b <sup>0</sup> | b <sup>0++</sup> | Seq. | y                 | y <sup>++</sup> | y <sup>*</sup> | y <sup>*++</sup> | # |
|---|------------|-----------------|----------------|------------------|----------------|------------------|------|-------------------|-----------------|----------------|------------------|---|
| 1 | 130.049869 | 65.528572       |                |                  | 112.039304     | 56.523290        | E    |                   |                 |                |                  | 5 |
| 2 | 243.133933 | 122.070605      |                |                  | 225.123368     | 113.065322       | I    | <b>855.486920</b> | 428.247098      | 838.460371     | 419.733824       | 4 |
| 3 | 371.192511 | 186.099894      | 354.165962     | 177.586619       | 353.181946     | 177.094611       | Q    | <b>742.402856</b> | 371.705066      | 725.376307     | 363.191792       | 3 |
| 4 | 810.417837 | 405.712557      | 793.391288     | 397.199282       | 792.407272     | 396.707274       | Q    | <b>614.344278</b> | 307.675777      | 597.317729     | 299.162503       | 2 |
| 5 |            |                 |                |                  |                |                  | R    | <b>175.118952</b> | 88.063114       | 158.092403     | 79.549840        | 1 |

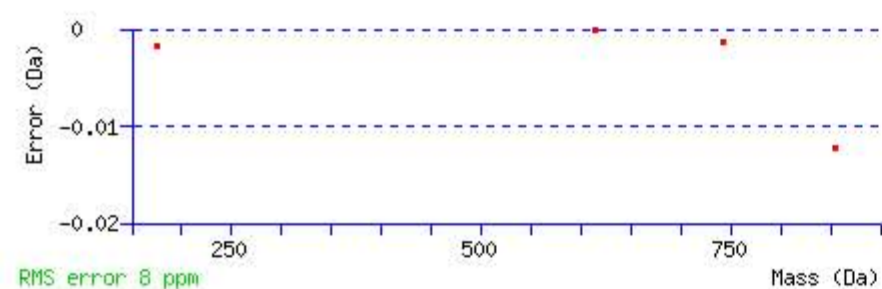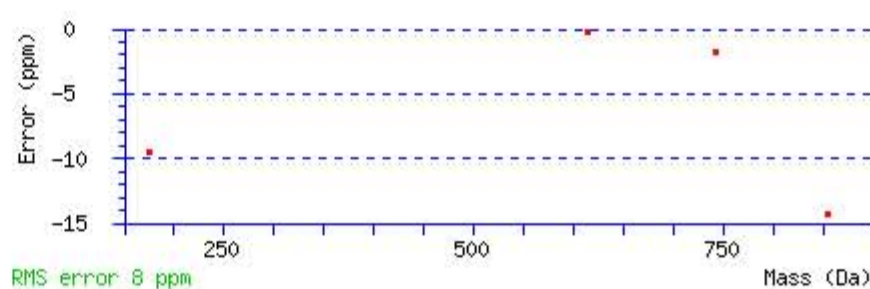

NCBI BLAST search of [EIQQR](#)

(Parameters: blastp, nr protein database, expect=20000, no filter, PAM30)

Other BLAST [web gateways](#)

All matches to this query

| Score | Mr(calc):  | Delta     | Sequence                 |
|-------|------------|-----------|--------------------------|
| 25.2  | 983.522217 | -0.005869 | <a href="#">EIQQR</a>    |
| 25.2  | 983.522217 | -0.005869 | <a href="#">ELQQR</a>    |
| 25.2  | 983.503601 | 0.012747  | <a href="#">ELQQVDPR</a> |
| 12.9  | 983.522217 | -0.005869 | <a href="#">IEQQR</a>    |
| 12.9  | 983.507599 | 0.008749  | <a href="#">LEKEFYR</a>  |
| 12.9  | 983.522217 | -0.005869 | <a href="#">LEQQR</a>    |
| 11.9  | 983.522217 | -0.005869 | <a href="#">EIQQR</a>    |
| 11.9  | 983.503586 | 0.012762  | <a href="#">EITSLHER</a> |
| 11.9  | 983.522217 | -0.005869 | <a href="#">ELQQR</a>    |
| 11.0  | 983.522217 | -0.005869 | <a href="#">EAAVQR</a>   |

Mascot: <http://www.matrixscience.com/>

# Mascot Search Results

## Peptide View

### MS/MS Fragmentation of **GNTEGLQK**

Found in **APOA4\_HUMAN**, Apolipoprotein A-IV OS=Homo sapiens GN=APOA4 PE=1 SV=3

Match to Query 16414: 1156.587208 from(579.300880,2+) rtinseconds(1457) index(28526)

Title: Locus:1.1.1.3170.14 File:"2013-07-02 CLN FXIII 180 min 3rd F 3.wiff"

Data file C:\Program Files (x86)\Matrix Science\Mascot Daemon\mgf9 FXIII 180 min 3rd\mascot\_daemon\_merge.mgf

Click mouse within plot area to zoom in by factor of two about that point

Or, Plot from  to  Da

Label all possible matches  Label matches used for scoring

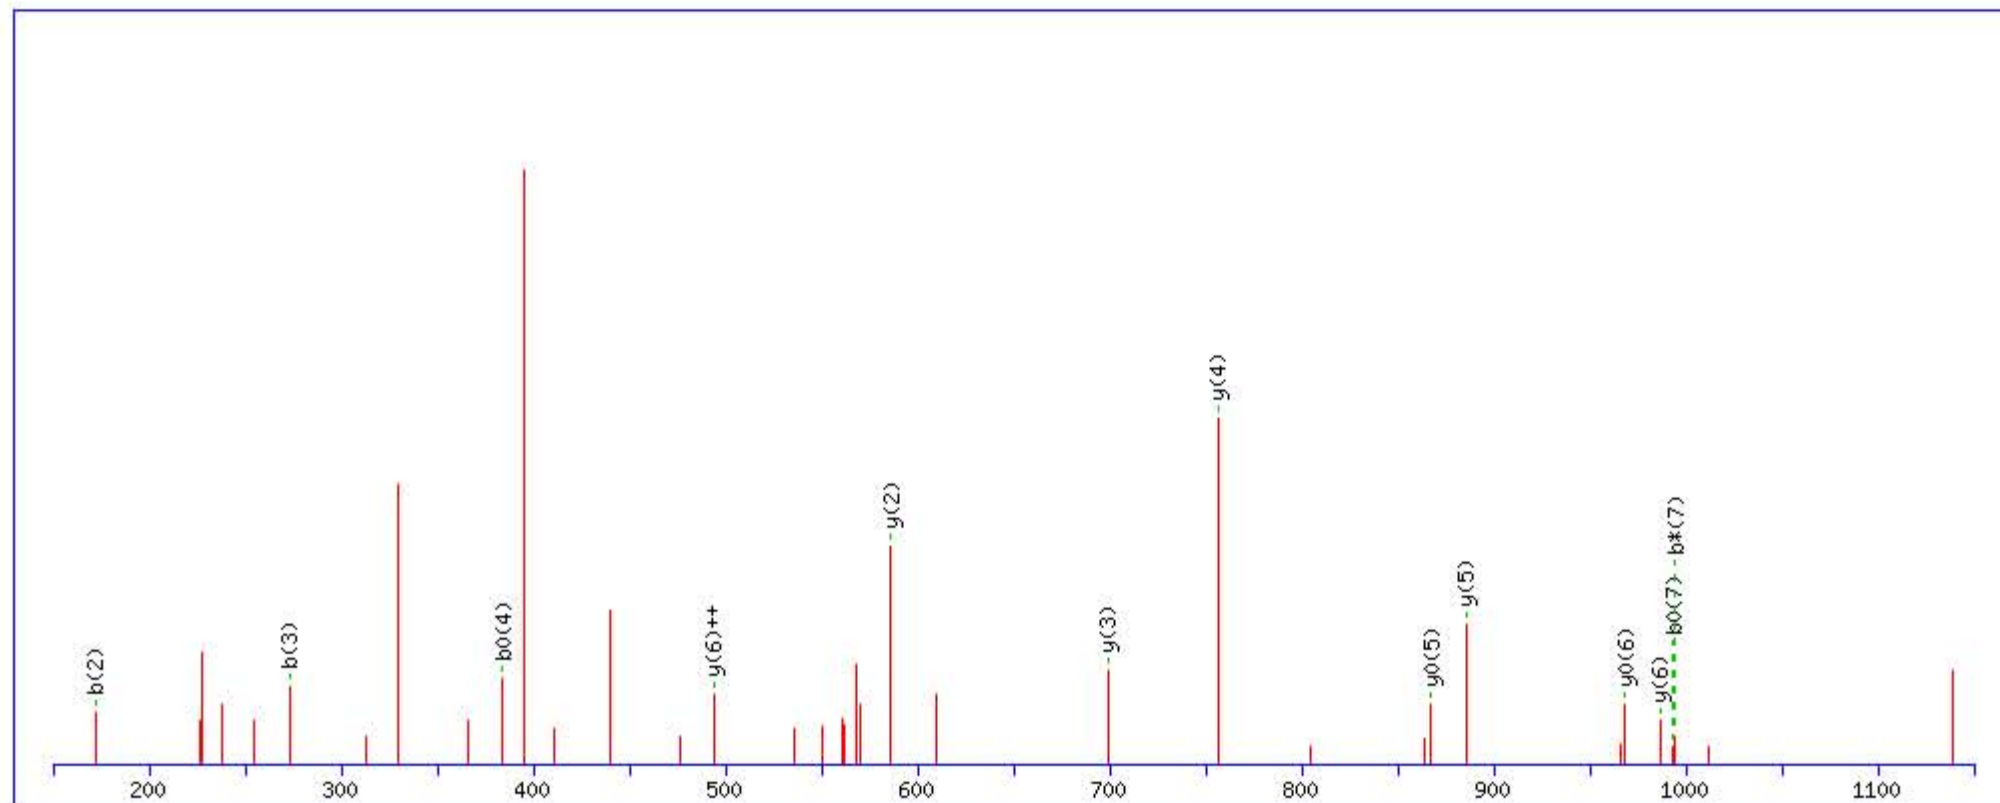

Monoisotopic mass of neutral peptide  $M_r(\text{calc})$ : 1156.591034

Fixed modifications: Carbamidomethyl (C) (apply to specified residues or termini only)

Variable modifications:

Q7 : Biotin:Thermo-21345 (Q)

Ions Score: 25 Expect: 0.013

Matches : 13/70 fragment ions using 26 most intense peaks ([help](#))

| # | b                 | b <sup>++</sup> | b <sup>*</sup>    | b <sup>*++</sup> | b <sup>0</sup>    | b <sup>0++</sup> | Seq.     | y                 | y <sup>++</sup>   | y <sup>*</sup> | y <sup>*++</sup> | y <sup>0</sup>    | y <sup>0++</sup> | # |
|---|-------------------|-----------------|-------------------|------------------|-------------------|------------------|----------|-------------------|-------------------|----------------|------------------|-------------------|------------------|---|
| 1 | 58.028740         | 29.518008       |                   |                  |                   |                  | <b>G</b> |                   |                   |                |                  |                   |                  | 8 |
| 2 | <b>172.071667</b> | 86.539471       | 155.045118        | 78.026197        |                   |                  | <b>N</b> | 1100.576857       | 550.792067        | 1083.550308    | 542.278792       | 1082.566292       | 541.786784       | 7 |
| 3 | <b>273.119346</b> | 137.063311      | 256.092797        | 128.550037       | 255.108781        | 128.058029       | <b>T</b> | <b>986.533930</b> | <b>493.770603</b> | 969.507381     | 485.257329       | <b>968.523365</b> | 484.765321       | 6 |
| 4 | 402.161939        | 201.584608      | 385.135390        | 193.071333       | <b>384.151374</b> | 192.579325       | <b>E</b> | <b>885.486251</b> | 443.246764        | 868.459702     | 434.733489       | <b>867.475686</b> | 434.241481       | 5 |
| 5 | 459.183403        | 230.095339      | 442.156854        | 221.582065       | 441.172838        | 221.090057       | <b>G</b> | <b>756.443658</b> | 378.725467        | 739.417109     | 370.212193       |                   |                  | 4 |
| 6 | 572.267467        | 286.637372      | 555.240918        | 278.124097       | 554.256902        | 277.632089       | <b>L</b> | <b>699.422194</b> | 350.214735        | 682.395645     | 341.701461       |                   |                  | 3 |
| 7 | 1011.492793       | 506.250035      | <b>994.466244</b> | 497.736760       | <b>993.482228</b> | 497.244752       | <b>Q</b> | <b>586.338130</b> | 293.672703        | 569.311581     | 285.159429       |                   |                  | 2 |
| 8 |                   |                 |                   |                  |                   |                  | <b>K</b> | 147.112804        | 74.060040         | 130.086255     | 65.546766        |                   |                  | 1 |

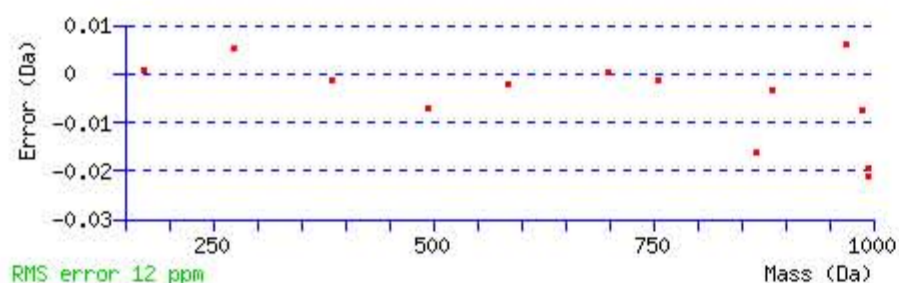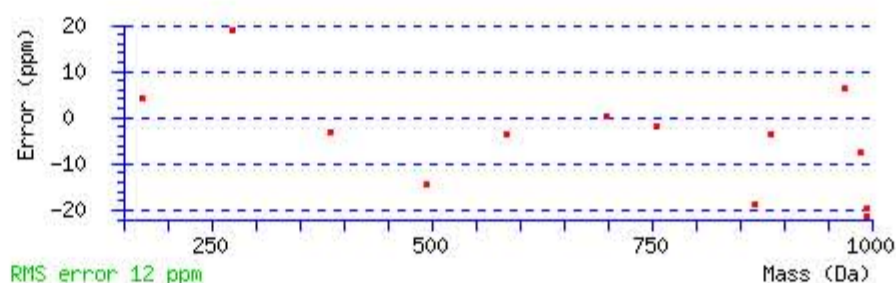

### NCBI BLAST search of **GNTEGLQK**

(Parameters: blastp, nr protein database, expect=20000, no filter, PAM30)

Other BLAST [web gateways](#)

### All matches to this query

| Score | $M_r(\text{calc})$ : | Delta     | Sequence                     |
|-------|----------------------|-----------|------------------------------|
| 25.1  | 1156.591034          | -0.003826 | <a href="#">GNTEGLQK</a>     |
| 4.7   | 1156.572418          | 0.014790  | <a href="#">GPQTSTSPASPK</a> |
| 0.5   | 1156.598923          | -0.011715 | <a href="#">GDRGGPGIPGFK</a> |

# MASCOT Search Results

## Peptide View

MS/MS Fragmentation of **IDQNVEELK**

Found in **APOA4\_HUMAN**, Apolipoprotein A-IV OS=Homo sapiens GN=APOA4 PE=1 SV=3

Match to Query 23553: 1397.716908 from(699.865730,2+) rtinseconds(1840) index(59630)

Title: Locus:1.1.1.1552.11 File:"2013-07-02 CLN FXIII 180 min 3rd FT.wiff"

Data file C:\Program Files (x86)\Matrix Science\Mascot Daemon\mgf9 FXIII 180 min 3rd\mascot\_daemon\_merge.mgf

Click mouse within plot area to zoom in by factor of two about that point

Or, Plot from  to  Da

Label all possible matches  Label matches used for scoring

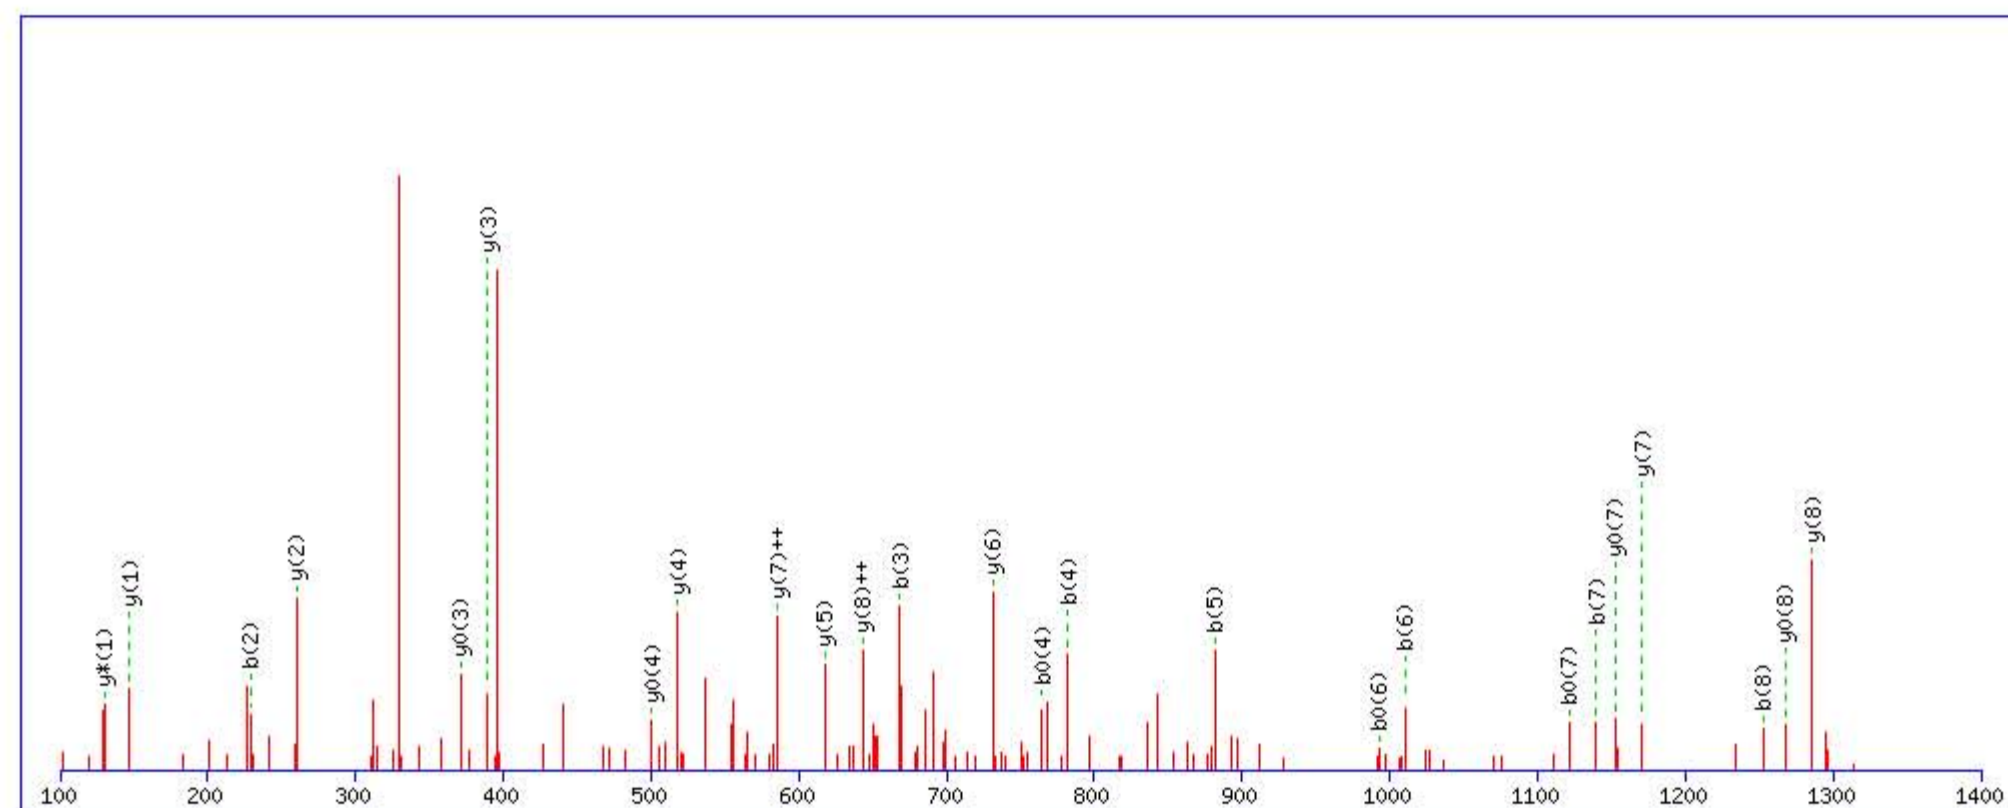

Monoisotopic mass of neutral peptide Mr(calc): 1397.722427

Fixed modifications: Carbamidomethyl (C) (apply to specified residues or termini only)

Variable modifications:

Q3 : Biotin:Thermo-21345 (Q)

Ions Score: 43 Expect: 0.00037

Matches : 25/86 fragment ions using 49 most intense peaks [\(help\)](#)

| # | b                  | b <sup>++</sup> | b <sup>*</sup> | b <sup>*++</sup> | b <sup>0</sup>     | b <sup>0++</sup> | Seq. | y                  | y <sup>++</sup>   | y <sup>*</sup>    | y <sup>*++</sup> | y <sup>0</sup>     | y <sup>0++</sup> | # |
|---|--------------------|-----------------|----------------|------------------|--------------------|------------------|------|--------------------|-------------------|-------------------|------------------|--------------------|------------------|---|
| 1 | 114.091340         | 57.549308       |                |                  |                    |                  | I    |                    |                   |                   |                  |                    |                  | 9 |
| 2 | <b>229.118283</b>  | 115.062779      |                |                  | 211.107718         | 106.057497       | D    | <b>1285.645664</b> | <b>643.326470</b> | 1268.619115       | 634.813196       | <b>1267.635099</b> | 634.321187       | 8 |
| 3 | <b>668.343609</b>  | 334.675443      | 651.317060     | 326.162168       | 650.333044         | 325.670160       | Q    | <b>1170.618721</b> | <b>585.812998</b> | 1153.592172       | 577.299724       | <b>1152.608156</b> | 576.807716       | 7 |
| 4 | <b>782.386536</b>  | 391.696906      | 765.359987     | 383.183631       | <b>764.375971</b>  | 382.691623       | N    | <b>731.393395</b>  | 366.200335        | 714.366846        | 357.687061       | 713.382830         | 357.195053       | 6 |
| 5 | <b>881.454950</b>  | 441.231113      | 864.428401     | 432.717838       | 863.444385         | 432.225830       | V    | <b>617.350468</b>  | 309.178872        | 600.323919        | 300.665597       | 599.339903         | 300.173589       | 5 |
| 6 | <b>1010.497543</b> | 505.752410      | 993.470994     | 497.239135       | <b>992.486978</b>  | 496.747127       | E    | <b>518.282054</b>  | 259.644665        | 501.255505        | 251.131390       | <b>500.271489</b>  | 250.639382       | 4 |
| 7 | <b>1139.540136</b> | 570.273706      | 1122.513587    | 561.760431       | <b>1121.529571</b> | 561.268423       | E    | <b>389.239461</b>  | 195.123368        | 372.212912        | 186.610094       | <b>371.228896</b>  | 186.118086       | 3 |
| 8 | <b>1252.624200</b> | 626.815738      | 1235.597651    | 618.302463       | 1234.613635        | 617.810455       | L    | <b>260.196868</b>  | 130.602072        | 243.170319        | 122.088797       |                    |                  | 2 |
| 9 |                    |                 |                |                  |                    |                  | K    | <b>147.112804</b>  | 74.060040         | <b>130.086255</b> | 65.546765        |                    |                  | 1 |

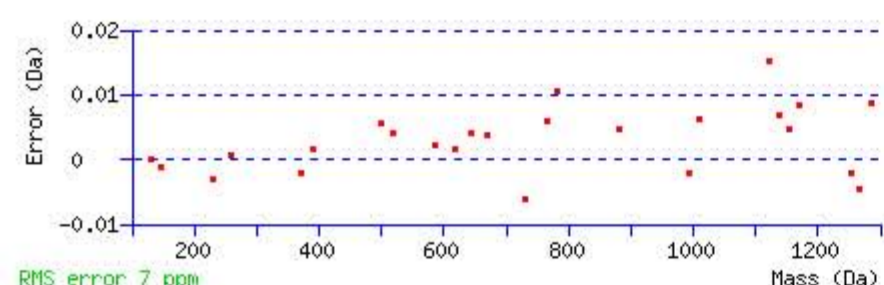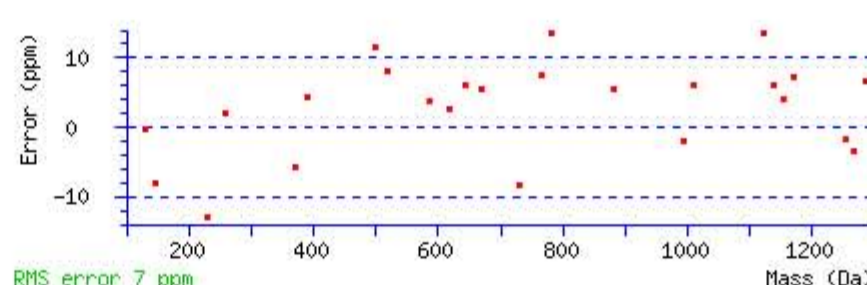

NCBI BLAST search of **IDQNVEELK**

(Parameters: blastp, nr protein database, expect=20000, no filter, PAM30)

Other BLAST [web gateways](#)

## All matches to this query

| Score | Mr(calc):   | Delta     | Sequence                     |
|-------|-------------|-----------|------------------------------|
| 43.0  | 1397.722427 | -0.005519 | <a href="#">IDQNVEELK</a>    |
| 6.0   | 1397.733688 | -0.016780 | <a href="#">LCDVTLKIGDHK</a> |
| 4.9   | 1397.737686 | -0.020778 | <a href="#">MYLNFLVSLGNK</a> |
| 4.7   | 1397.722412 | -0.005504 | <a href="#">QLEAQLEEK</a>    |
| 4.5   | 1397.701309 | 0.015599  | <a href="#">LLFNFVEQNMK</a>  |
| 3.8   | 1397.737686 | -0.020778 | <a href="#">LKEFCGEFLKK</a>  |
| 3.6   | 1397.715897 | 0.001011  | <a href="#">IKSADKMPPMHK</a> |
| 3.6   | 1397.733658 | -0.016750 | <a href="#">QNITNQLEK</a>    |
| 3.1   | 1397.715897 | 0.001011  | <a href="#">IKSADKMPPMHK</a> |
| 3.0   | 1397.704651 | 0.012257  | <a href="#">QLEKQMYSIMK</a>  |



# MASCOT Search Results

## Peptide View

MS/MS Fragmentation of **IDQTV EELR**

Found in **APOA4\_HUMAN**, Apolipoprotein A-IV OS=Homo sapiens GN=APOA4 PE=1 SV=3

Match to Query 24506: 1412.724508 from(707.369530,2+) rtinseconds(1926) index(18540)

Title: Locus:1.1.1.3236.17 File:"2013-07-02 CLN FXIII 180 min 3rd F 2.wiff"

Data file C:\Program Files (x86)\Matrix Science\Mascot Daemon\mgf\9 FXIII 180 min 3rd\mascot\_daemon\_merge.mgf

Click mouse within plot area to zoom in by factor of two about that point

Or, Plot from  to  Da

Label all possible matches  Label matches used for scoring

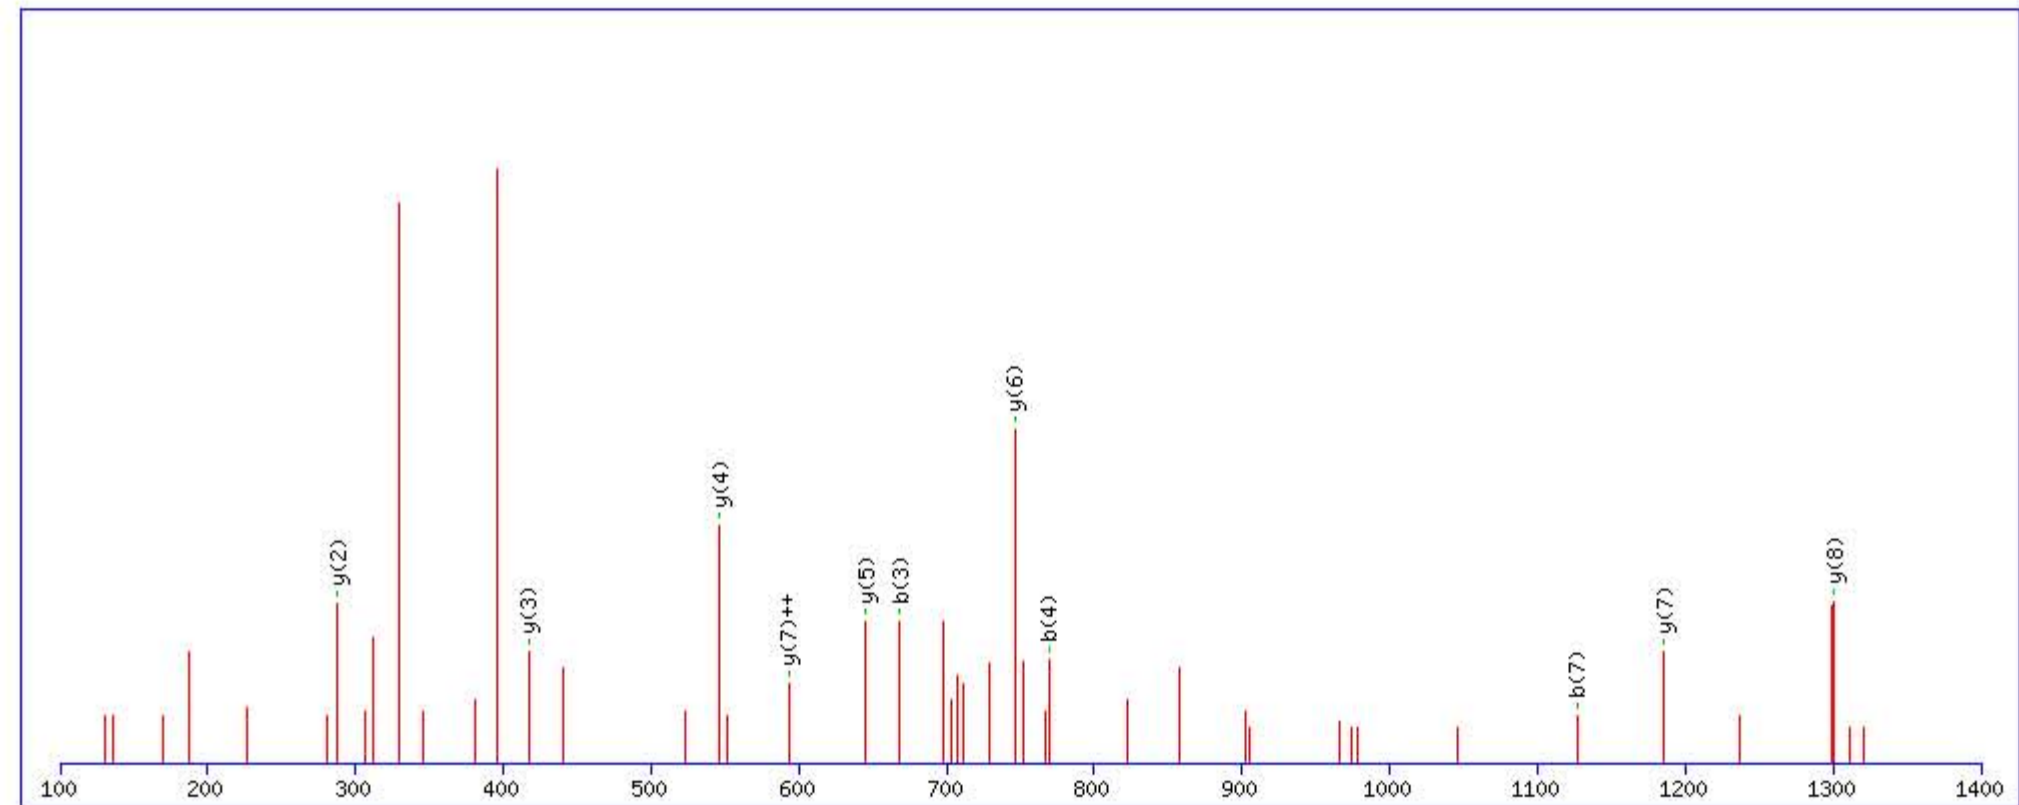

Monoisotopic mass of neutral peptide Mr(calc): 1412.733337

Fixed modifications: Carbamidomethyl (C) (apply to specified residues or termini only)

Variable modifications:

Q3 : Biotin:Thermo-21345 (Q)

Ions Score: 36 Expect: 0.00095

Matches : 11/86 fragment ions using 23 most intense peaks [\(help\)](#)

| # | b           | b <sup>++</sup> | b <sup>+</sup> | b <sup>*++</sup> | b <sup>0</sup> | b <sup>0++</sup> | Seq. | y           | y <sup>++</sup> | y <sup>+</sup> | y <sup>*++</sup> | y <sup>0</sup> | y <sup>0++</sup> | # |
|---|-------------|-----------------|----------------|------------------|----------------|------------------|------|-------------|-----------------|----------------|------------------|----------------|------------------|---|
| 1 | 114.091340  | 57.549308       |                |                  |                |                  | I    |             |                 |                |                  |                |                  | 9 |
| 2 | 229.118283  | 115.062779      |                |                  | 211.107718     | 106.057497       | D    | 1300.656564 | 650.831920      | 1283.630015    | 642.318646       | 1282.645999    | 641.826638       | 8 |
| 3 | 668.343609  | 334.675443      | 651.317060     | 326.162168       | 650.333044     | 325.670160       | Q    | 1185.629621 | 593.318449      | 1168.603072    | 584.805174       | 1167.619056    | 584.313166       | 7 |
| 4 | 769.391288  | 385.199282      | 752.364739     | 376.686008       | 751.380723     | 376.194000       | T    | 746.404295  | 373.705786      | 729.377746     | 365.192511       | 728.393730     | 364.700503       | 6 |
| 5 | 868.459702  | 434.733489      | 851.433153     | 426.220215       | 850.449137     | 425.728207       | V    | 645.356616  | 323.181946      | 628.330067     | 314.668672       | 627.346051     | 314.176664       | 5 |
| 6 | 997.502295  | 499.254786      | 980.475746     | 490.741511       | 979.491730     | 490.249503       | E    | 546.288202  | 273.647739      | 529.261653     | 265.134465       | 528.277637     | 264.642457       | 4 |
| 7 | 1126.544888 | 563.776082      | 1109.518339    | 555.262808       | 1108.534323    | 554.770800       | E    | 417.245609  | 209.126442      | 400.219060     | 200.613168       | 399.235044     | 200.121160       | 3 |
| 8 | 1239.628952 | 620.318114      | 1222.602403    | 611.804840       | 1221.618387    | 611.312832       | L    | 288.203016  | 144.605146      | 271.176467     | 136.091871       |                |                  | 2 |
| 9 |             |                 |                |                  |                |                  | R    | 175.118952  | 88.063114       | 158.092403     | 79.549839        |                |                  | 1 |

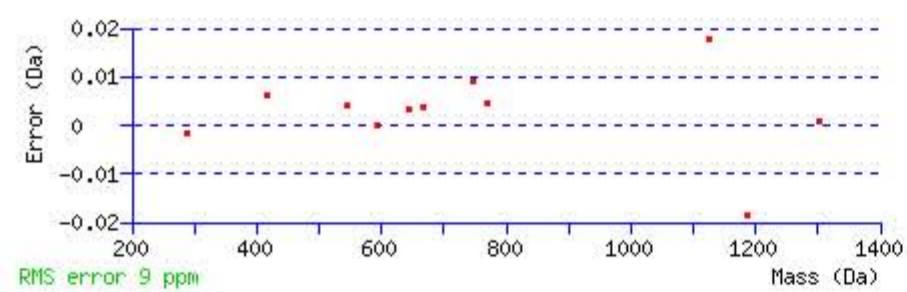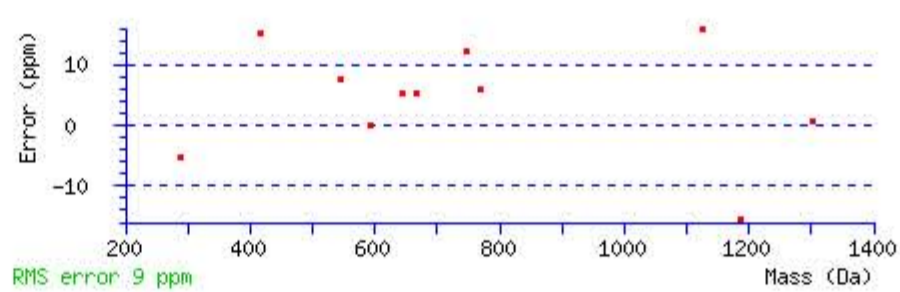

NCBI BLAST search of **IDQTV EELR**

(Parameters: blastp, nr protein database, expect=20000, no filter, PAM30)

Other BLAST [web gateways](#)

## All matches to this query

| Score | Mr(calc):   | Delta     | Sequence                     |
|-------|-------------|-----------|------------------------------|
| 35.9  | 1412.733337 | -0.008829 | <a href="#">IDQTV EELR</a>   |
| 3.5   | 1412.744537 | -0.020029 | <a href="#">IPPEKMRELER</a>  |
| 1.1   | 1412.708191 | 0.016317  | <a href="#">LQESASGTGPR</a>  |
| 1.1   | 1412.737167 | -0.012659 | <a href="#">HSESVKTERNVK</a> |

Mascot: <http://www.matrixscience.com/>

# MASCOT Search Results

## Peptide View

MS/MS Fragmentation of **LEPYADQLR**

Found in **APOA4\_HUMAN**, Apolipoprotein A-IV OS=Homo sapiens GN=APOA4 PE=1 SV=3

Match to Query 24541: 1414.720868 from(708.367710,2+) rtinseconds(2004) index(31924)

Title: Locus:1.1.1.3361.21 File:"2013-07-02 CLN FXIII 180 min 3rd F 3.wiff"

Data file C:\Program Files (x86)\Matrix Science\Mascot Daemon\mgf\9 FXIII 180 min 3rd\mascot\_daemon\_merge.mgf

Click mouse within plot area to zoom in by factor of two about that point

Or, Plot from  to  Da

Label all possible matches  Label matches used for scoring

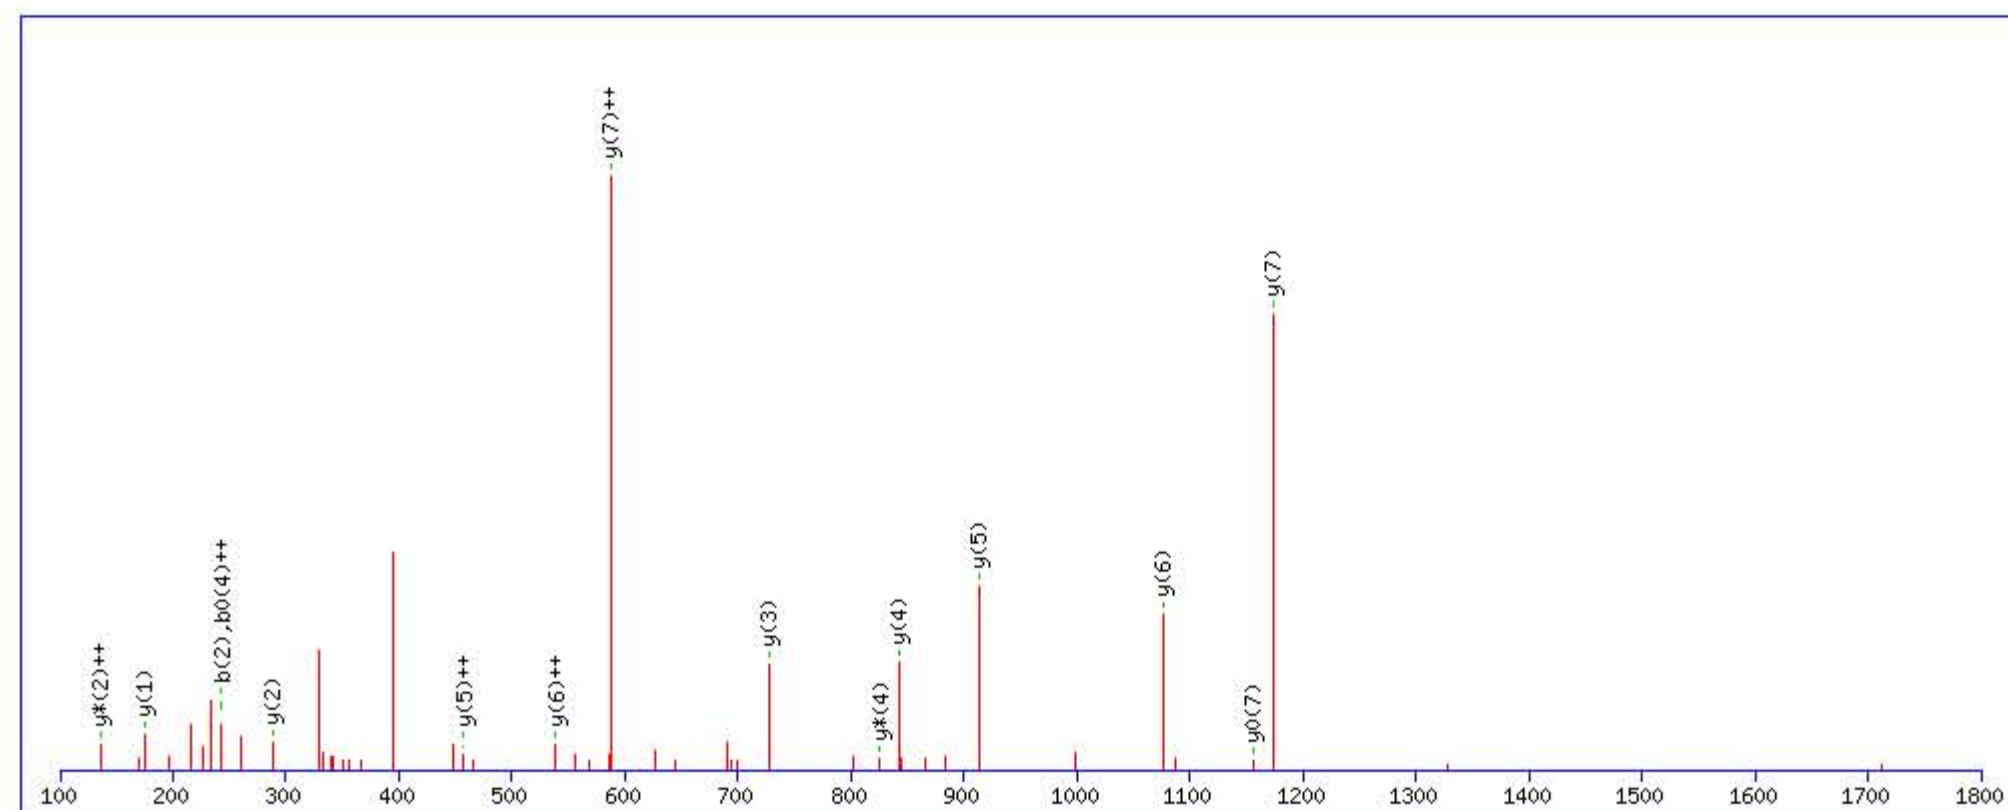

Monoisotopic mass of neutral peptide Mr(calc): 1414.727844

Fixed modifications: Carbamidomethyl (C) (apply to specified residues or termini only)

Variable modifications:

Q7 : Biotin:Thermo-21345 (Q)

Ions Score: 32 Expect: 0.0032

Matches : 15/76 fragment ions using 36 most intense peaks [\(help\)](#)

| # | b                 | b <sup>++</sup> | b <sup>*</sup> | b <sup>*++</sup> | b <sup>0</sup> | b <sup>0++</sup>  | Seq. | y                  | y <sup>++</sup>   | y <sup>*</sup>    | y <sup>*++</sup>  | y <sup>0</sup>     | y <sup>0++</sup> | # |
|---|-------------------|-----------------|----------------|------------------|----------------|-------------------|------|--------------------|-------------------|-------------------|-------------------|--------------------|------------------|---|
| 1 | 114.091340        | 57.549308       |                |                  |                |                   | L    |                    |                   |                   |                   |                    |                  | 9 |
| 2 | <b>243.133933</b> | 122.070605      |                |                  | 225.123368     | 113.065322        | E    | 1302.651085        | 651.829181        | 1285.624536       | 643.315906        | 1284.640520        | 642.823898       | 8 |
| 3 | 340.186697        | 170.596987      |                |                  | 322.176132     | 161.591704        | P    | <b>1173.608492</b> | <b>587.307884</b> | 1156.581943       | 578.794610        | <b>1155.597927</b> | 578.302602       | 7 |
| 4 | 503.250026        | 252.128651      |                |                  | 485.239461     | <b>243.123369</b> | Y    | <b>1076.555728</b> | <b>538.781502</b> | 1059.529179       | 530.268228        | 1058.545163        | 529.776220       | 6 |
| 5 | 574.287140        | 287.647208      |                |                  | 556.276575     | 278.641926        | A    | <b>913.492399</b>  | <b>457.249838</b> | 896.465850        | 448.736563        | 895.481834         | 448.244555       | 5 |
| 6 | 689.314083        | 345.160680      |                |                  | 671.303518     | 336.155397        | D    | <b>842.455285</b>  | 421.731281        | <b>825.428736</b> | 413.218006        | 824.444720         | 412.725998       | 4 |
| 7 | 1128.539409       | 564.773343      | 1111.512860    | 556.260068       | 1110.528844    | 555.768060        | Q    | <b>727.428342</b>  | 364.217809        | 710.401793        | 355.704535        |                    |                  | 3 |
| 8 | 1241.623473       | 621.315375      | 1224.596924    | 612.802100       | 1223.612908    | 612.310092        | L    | <b>288.203016</b>  | 144.605146        | 271.176467        | <b>136.091871</b> |                    |                  | 2 |
| 9 |                   |                 |                |                  |                |                   | R    | <b>175.118952</b>  | 88.063114         | 158.092403        | 79.549839         |                    |                  | 1 |

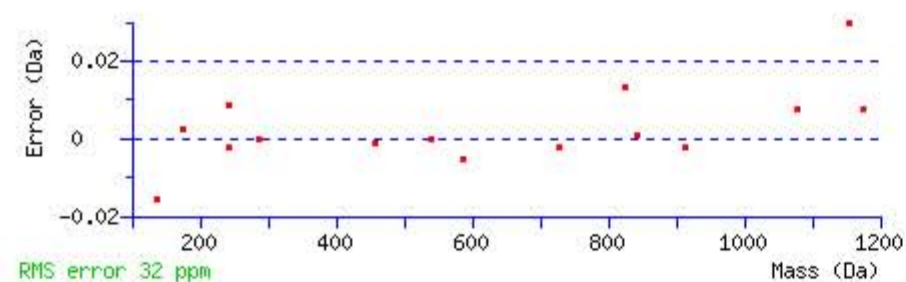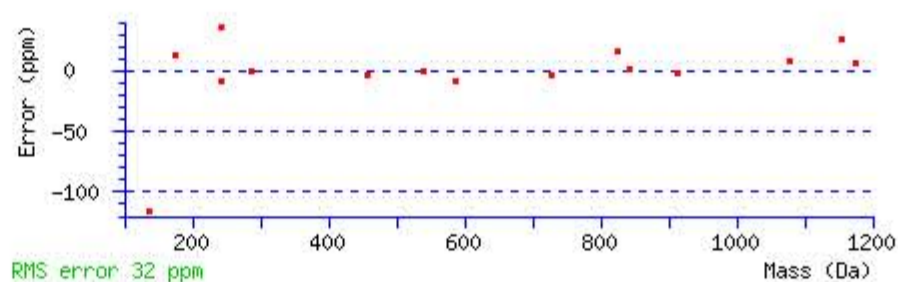

NCBI BLAST search of **LEPYADQLR**

(Parameters: blastp, nr protein database, expect=20000, no filter, PAM30)

Other BLAST [web gateways](#)

## All matches to this query

| Score | Mr(calc):   | Delta     | Sequence                       |
|-------|-------------|-----------|--------------------------------|
| 32.0  | 1414.727844 | -0.006976 | <a href="#">LEPYADQLR</a>      |
| 5.1   | 1414.735931 | -0.015063 | <a href="#">LMRGLLHCMIR</a>    |
| 3.0   | 1414.712585 | 0.008283  | <a href="#">EISTEEQLR</a>      |
| 1.3   | 1414.741547 | -0.020679 | <a href="#">EIEENQKRIEK</a>    |
| 1.0   | 1414.741577 | -0.020709 | <a href="#">ELDVEVSRLEAR</a>   |
| 0.7   | 1414.717789 | 0.003079  | <a href="#">GKGAAGGSWQQRGR</a> |

# MASCOT Search Results

## Peptide View

MS/MS Fragmentation of **ALVQQMEQLR**

Found in **APOA4\_HUMAN**, Apolipoprotein A-IV OS=Homo sapiens GN=APOA4 PE=1 SV=3

Match to Query 28010: 1525.807328 from(763.910940,2+) rtinseconds(2124) index(32592)

Title: Locus:1.1.1.3403.4 File:"2013-07-02 CLN FXIII 180 min 3rd F 3.wiff"

Data file C:\Program Files (x86)\Matrix Science\Mascot Daemon\mgf9 FXIII 180 min 3rd\mascot\_daemon\_merge.mgf

Click mouse within plot area to zoom in by factor of two about that point

Or, Plot from  to  Da

Label all possible matches  Label matches used for scoring

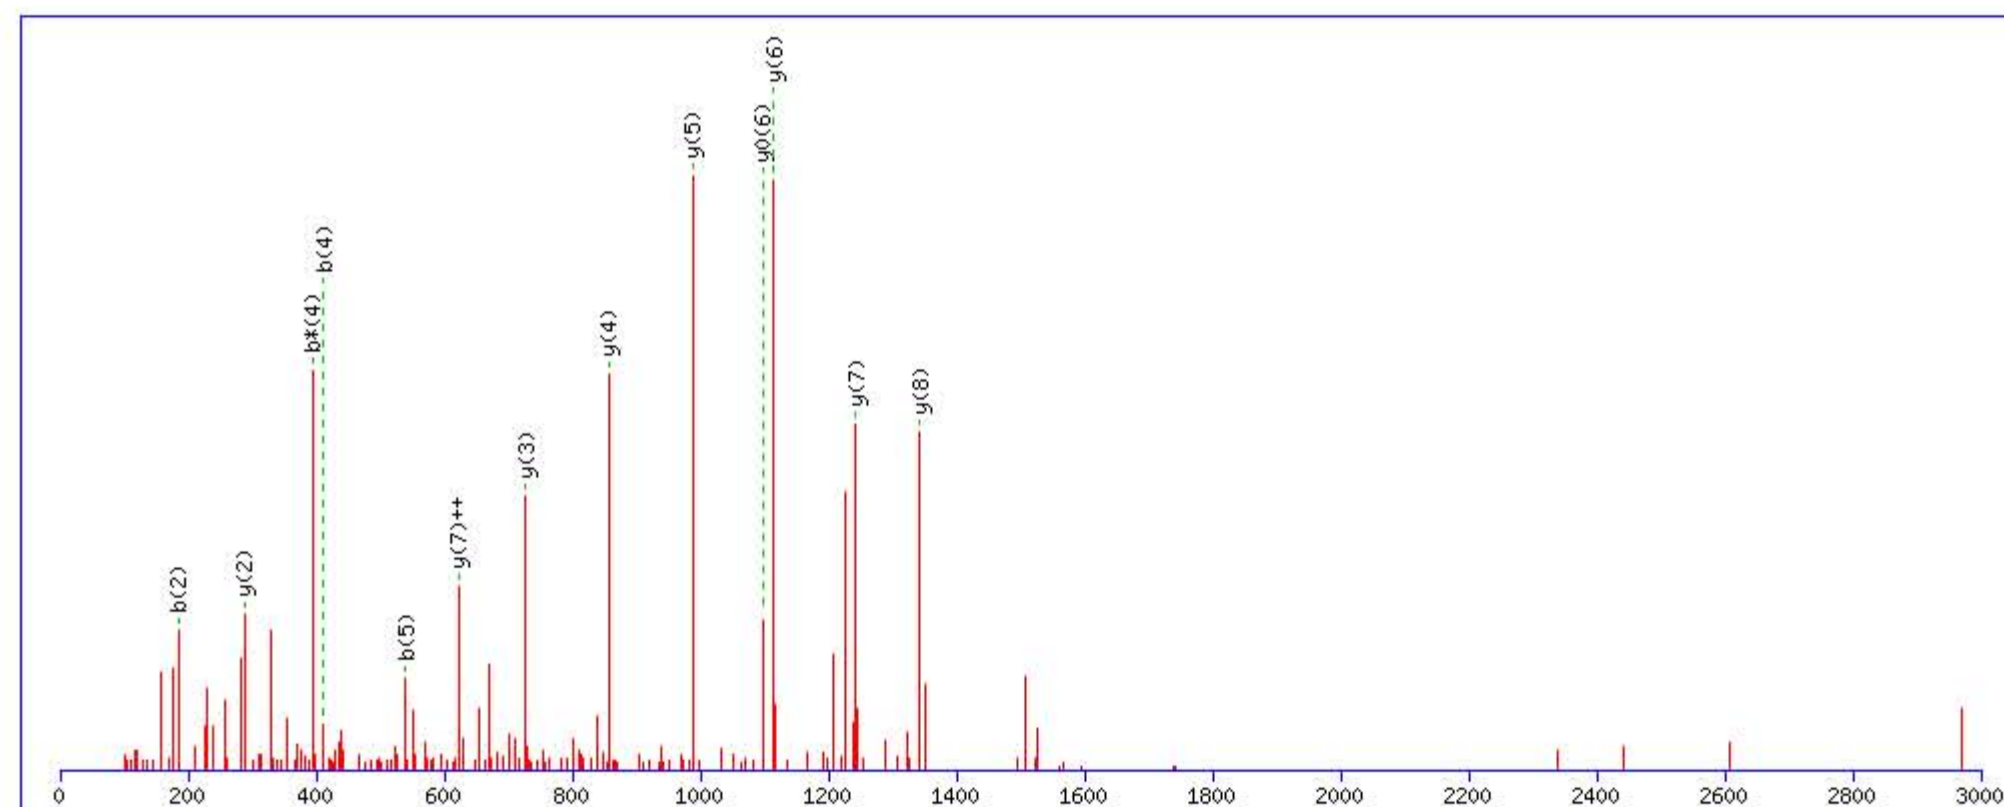

Monoisotopic mass of neutral peptide Mr(calc): 1525.810867

Fixed modifications: Carbamidomethyl (C) (apply to specified residues or termini only)

Variable modifications:

Q8 : Biotin:Thermo-21345 (Q)

Ions Score: 62 Expect: 1.9e-005

Matches : 13/84 fragment ions using 15 most intense peaks [\(help\)](#)

| #  | b                 | b <sup>++</sup> | b <sup>+</sup>    | b <sup>+++</sup> | b <sup>0</sup> | b <sup>0++</sup> | Seq. | y                  | y <sup>++</sup>   | y <sup>+</sup> | y <sup>+++</sup> | y <sup>0</sup>     | y <sup>0++</sup> | #  |
|----|-------------------|-----------------|-------------------|------------------|----------------|------------------|------|--------------------|-------------------|----------------|------------------|--------------------|------------------|----|
| 1  | 72.044390         | 36.525833       |                   |                  |                |                  | A    |                    |                   |                |                  |                    |                  | 10 |
| 2  | <b>185.128454</b> | 93.067865       |                   |                  |                |                  | L    | 1455.781054        | 728.394165        | 1438.754505    | 719.880890       | 1437.770489        | 719.388882       | 9  |
| 3  | 284.196868        | 142.602072      |                   |                  |                |                  | V    | <b>1342.696990</b> | 671.852133        | 1325.670441    | 663.338858       | 1324.686425        | 662.846850       | 8  |
| 4  | <b>412.255446</b> | 206.631361      | <b>395.228897</b> | 198.118087       |                |                  | Q    | <b>1243.628576</b> | <b>622.317926</b> | 1226.602027    | 613.804651       | 1225.618011        | 613.312643       | 7  |
| 5  | <b>540.314024</b> | 270.660650      | 523.287475        | 262.147376       |                |                  | Q    | <b>1115.569998</b> | 558.288637        | 1098.543449    | 549.775362       | <b>1097.559433</b> | 549.283354       | 6  |
| 6  | 671.354509        | 336.180893      | 654.327960        | 327.667618       |                |                  | M    | <b>987.511420</b>  | 494.259348        | 970.484871     | 485.746073       | 969.500855         | 485.254065       | 5  |
| 7  | 800.397102        | 400.702189      | 783.370553        | 392.188915       | 782.386537     | 391.696907       | E    | <b>856.470935</b>  | 428.739105        | 839.444386     | 420.225831       | 838.460370         | 419.733823       | 4  |
| 8  | 1239.622428       | 620.314852      | 1222.595879       | 611.801578       | 1221.611863    | 611.309569       | Q    | <b>727.428342</b>  | 364.217809        | 710.401793     | 355.704534       |                    |                  | 3  |
| 9  | 1352.706492       | 676.856884      | 1335.679943       | 668.343609       | 1334.695927    | 667.851601       | L    | <b>288.203016</b>  | 144.605146        | 271.176467     | 136.091871       |                    |                  | 2  |
| 10 |                   |                 |                   |                  |                |                  | R    | 175.118952         | 88.063114         | 158.092403     | 79.549839        |                    |                  | 1  |

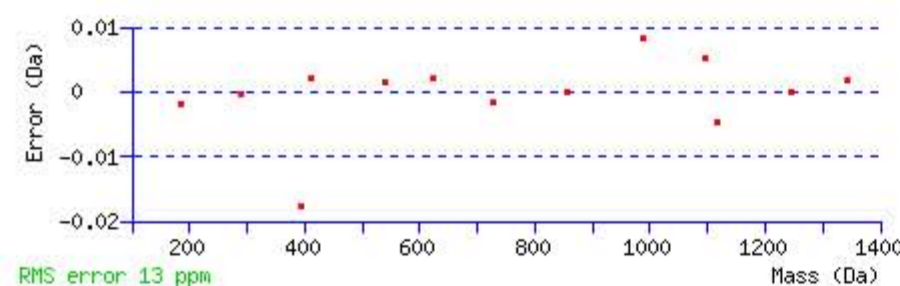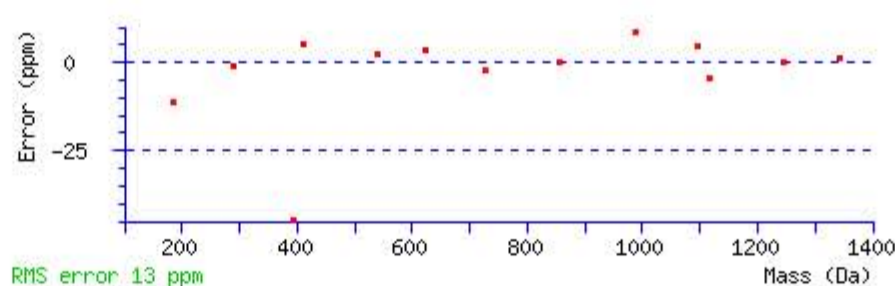

NCBI BLAST search of **ALVQQMEQLR**

(Parameters: blastp, nr protein database, expect=20000, no filter, PAM30)

Other BLAST [web gateways](#)

## All matches to this query

| Score | Mr(calc):   | Delta     | Sequence                       |
|-------|-------------|-----------|--------------------------------|
| 61.8  | 1525.810867 | -0.003539 | <a href="#">ALVQQMEQLR</a>     |
| 19.9  | 1525.810867 | -0.003539 | <a href="#">ALVQQMEQLR</a>     |
| 14.1  | 1525.792236 | 0.015092  | <a href="#">ALTEQQEQLR</a>     |
| 9.9   | 1525.798752 | 0.008576  | <a href="#">SPVKEEKPKQEVK</a>  |
| 7.2   | 1525.803467 | 0.003861  | <a href="#">SPSPRSSMAAVALR</a> |
| 6.9   | 1525.810867 | -0.003539 | <a href="#">ALVQQMEQLR</a>     |
| 5.9   | 1525.784836 | 0.022492  | <a href="#">LAQVATEEPERQR</a>  |
| 5.4   | 1525.814697 | -0.007369 | <a href="#">ERQRTEQLR</a>      |
| 5.0   | 1525.800064 | 0.007264  | <a href="#">ARALQSYEAKAR</a>   |
| 4.0   | 1525.807495 | -0.000167 | <a href="#">WPPQQLMLSAALR</a>  |

# MASCOT Search Results

## Peptide View

MS/MS Fragmentation of **LLPHANEVSQK**

Found in **APOA4\_HUMAN**, Apolipoprotein A-IV OS=Homo sapiens GN=APOA4 PE=1 SV=3

Match to Query 28428: 1545.828432 from(516.283420,3+) rtinseconds(1553) index(58246)

Title: Locus:1.1.1.1452.7 File:"2013-07-02 CLN FXIII 180 min 3rd FT.wiff"

Data file C:\Program Files (x86)\Matrix Science\Mascot Daemon\mgf9 FXIII 180 min 3rd\mascot\_daemon\_merge.mgf

Click mouse within plot area to zoom in by factor of two about that point

Or, Plot from  to  Da

Label all possible matches  Label matches used for scoring

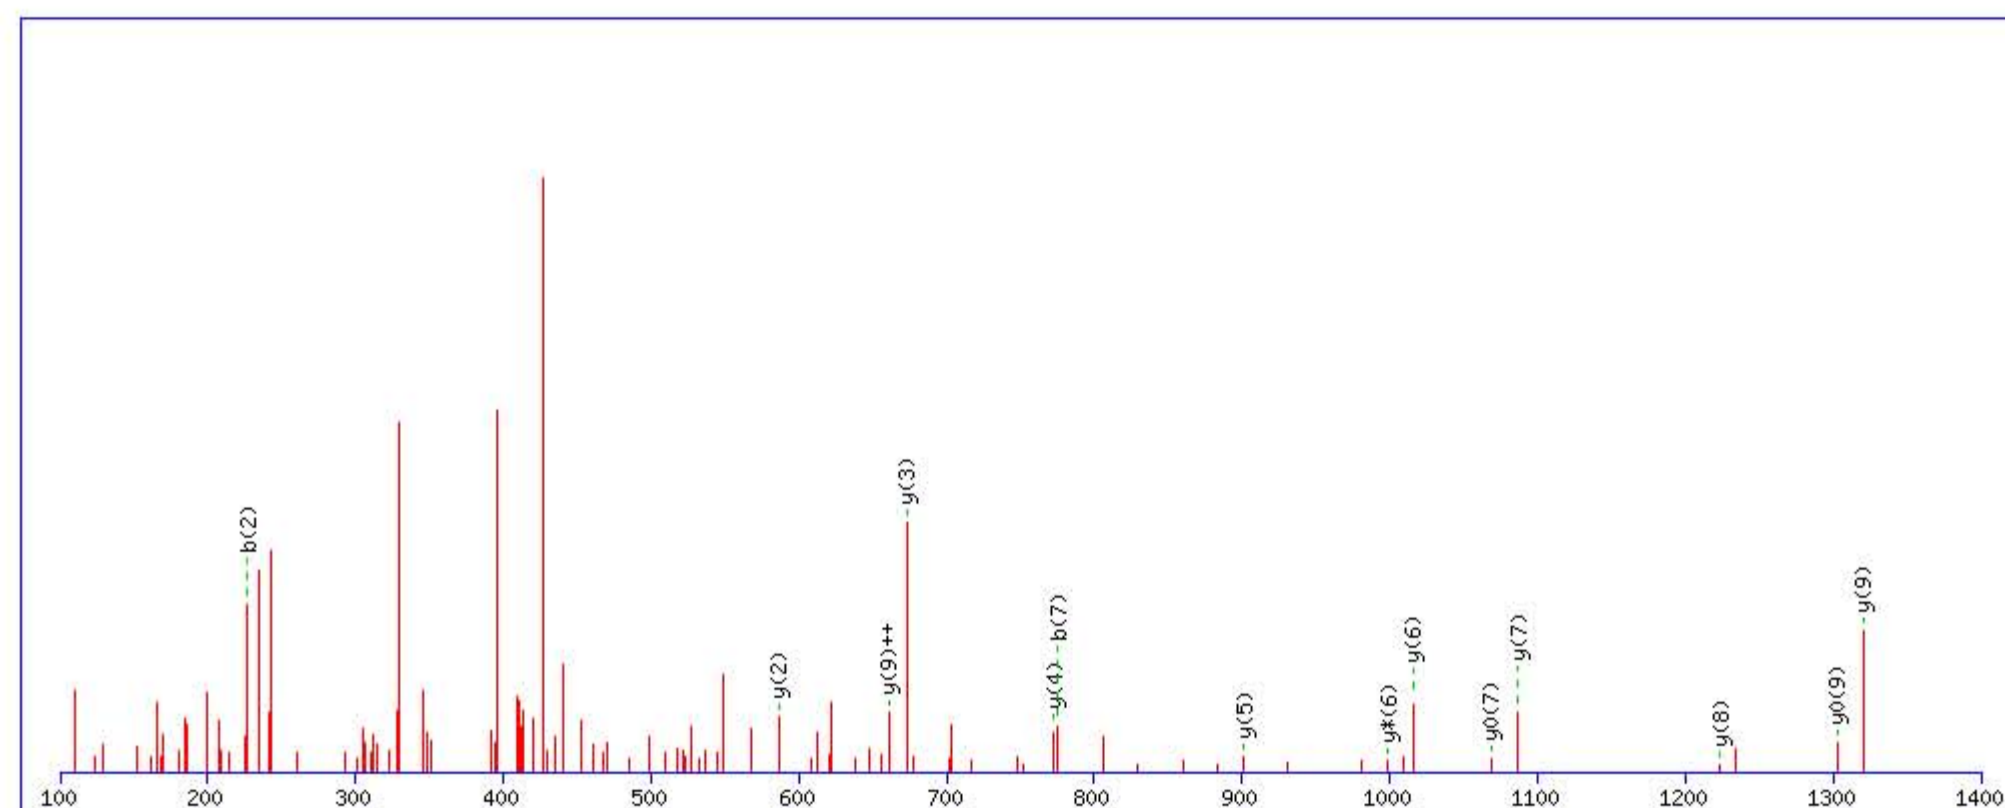

Monoisotopic mass of neutral peptide Mr(calc): 1545.833710

Fixed modifications: Carbamidomethyl (C) (apply to specified residues or termini only)

Variable modifications:

Q10 : Biotin:Thermo-21345 (Q)

Ions Score: 34 Expect: 0.0092

Matches : 14/94 fragment ions using 34 most intense peaks [\(help\)](#)

| #  | b                 | b <sup>++</sup> | b <sup>*</sup> | b <sup>*++</sup> | b <sup>0</sup> | b <sup>0++</sup> | Seq. | y                  | y <sup>++</sup>   | y <sup>*</sup>    | y <sup>*++</sup> | y <sup>0</sup>     | y <sup>0++</sup> | #  |
|----|-------------------|-----------------|----------------|------------------|----------------|------------------|------|--------------------|-------------------|-------------------|------------------|--------------------|------------------|----|
| 1  | 114.091340        | 57.549308       |                |                  |                |                  | L    |                    |                   |                   |                  |                    |                  | 11 |
| 2  | <b>227.175404</b> | 114.091340      |                |                  |                |                  | L    | 1433.756946        | 717.382111        | 1416.730397       | 708.868837       | 1415.746381        | 708.376828       | 10 |
| 3  | 324.228168        | 162.617722      |                |                  |                |                  | P    | <b>1320.672882</b> | <b>660.840079</b> | 1303.646333       | 652.326804       | <b>1302.662317</b> | 651.834796       | 9  |
| 4  | 461.287080        | 231.147178      |                |                  |                |                  | H    | <b>1223.620118</b> | 612.313697        | 1206.593569       | 603.800422       | 1205.609553        | 603.308414       | 8  |
| 5  | 532.324194        | 266.665735      |                |                  |                |                  | A    | <b>1086.561206</b> | 543.784241        | 1069.534657       | 535.270966       | <b>1068.550641</b> | 534.778958       | 7  |
| 6  | 646.367121        | 323.687199      | 629.340572     | 315.173924       |                |                  | N    | <b>1015.524092</b> | 508.265684        | <b>998.497543</b> | 499.752409       | 997.513527         | 499.260401       | 6  |
| 7  | <b>775.409714</b> | 388.208495      | 758.383165     | 379.695221       | 757.399149     | 379.203213       | E    | <b>901.481165</b>  | 451.244220        | 884.454616        | 442.730946       | 883.470600         | 442.238938       | 5  |
| 8  | 874.478128        | 437.742702      | 857.451579     | 429.229427       | 856.467563     | 428.737419       | V    | <b>772.438572</b>  | 386.722924        | 755.412023        | 378.209649       | 754.428007         | 377.717641       | 4  |
| 9  | 961.510156        | 481.258716      | 944.483607     | 472.745441       | 943.499591     | 472.253433       | S    | <b>673.370158</b>  | 337.188717        | 656.343609        | 328.675442       | 655.359593         | 328.183434       | 3  |
| 10 | 1400.735482       | 700.871379      | 1383.708933    | 692.358104       | 1382.724917    | 691.866096       | Q    | <b>586.338130</b>  | 293.672703        | 569.311581        | 285.159428       |                    |                  | 2  |
| 11 |                   |                 |                |                  |                |                  | K    | 147.112804         | 74.060040         | 130.086255        | 65.546765        |                    |                  | 1  |

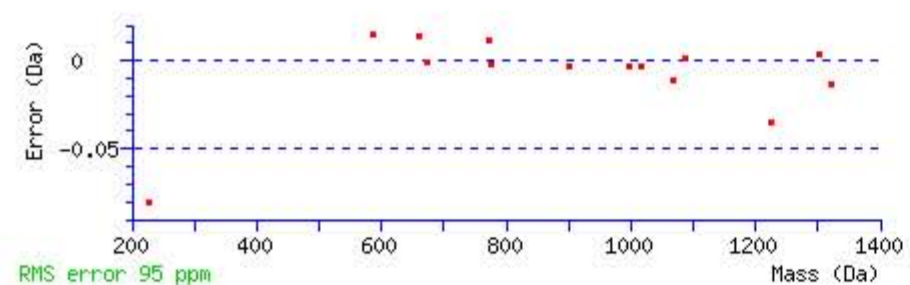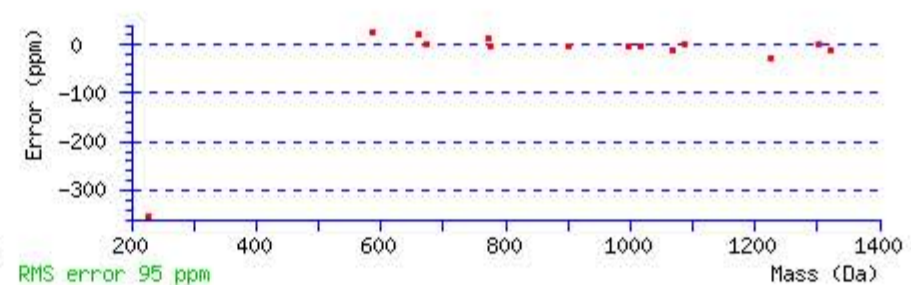

NCBI BLAST search of [LLPHANEVSQK](#)

(Parameters: blastp, nr protein database, expect=20000, no filter, PAM30)

Other BLAST [web gateways](#)

All matches to this query

| Score | Mr(calc):   | Delta     | Sequence                    |
|-------|-------------|-----------|-----------------------------|
| 33.7  | 1545.833710 | -0.005278 | <a href="#">LLPHANEVSQK</a> |

Mascot: <http://www.matrixscience.com/>

# MASCOT SCIENCE Mascot Search Results

## Peptide View

MS/MS Fragmentation of **TQVNTQAEQLR**

Found in **APOA4\_HUMAN**, Apolipoprotein A-IV OS=Homo sapiens GN=APOA4 PE=1 SV=3

Match to Query 30518: 1597.815672 from(533.612500,3+) rtinseconds(1623) index(29572)

Title: Locus:1.1.1.3228.16 File:"2013-07-02 CLN FXIII 180 min 3rd F 3.wiff"

Data file C:\Program Files (x86)\Matrix Science\Mascot Daemon\mgf\9 FXIII 180 min 3rd\mascot\_daemon\_merge.mgf

Click mouse within plot area to zoom in by factor of two about that point

Or, Plot from  to  Da

Label all possible matches  Label matches used for scoring

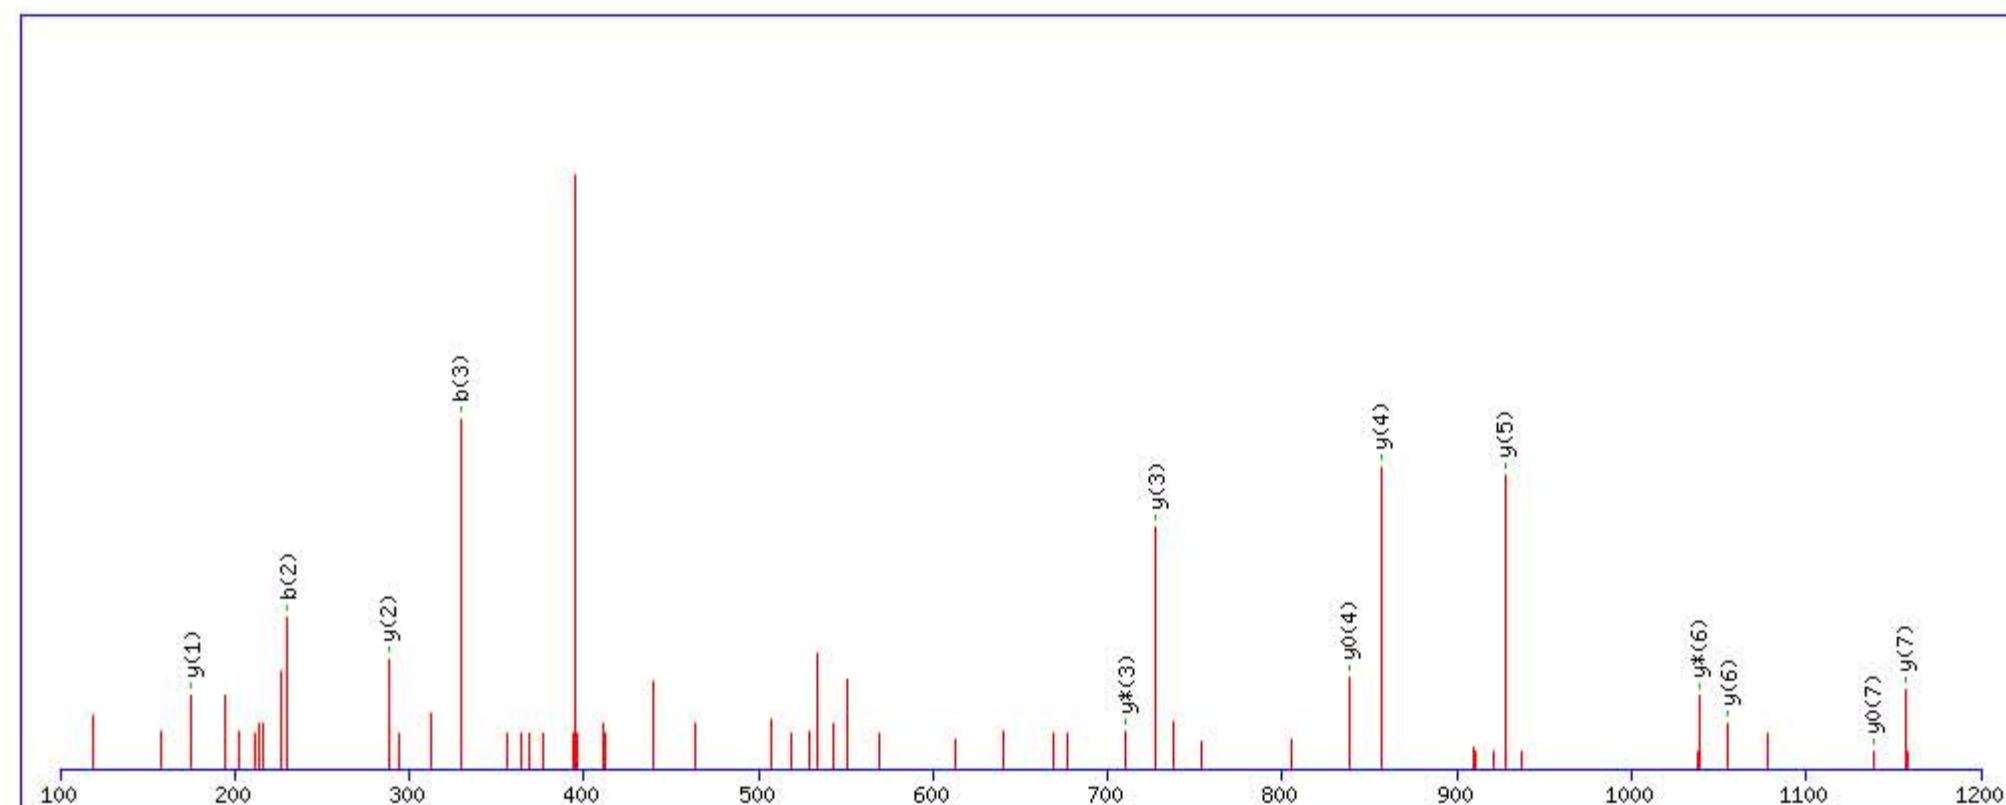

Monoisotopic mass of neutral peptide Mr(calc): 1597.824615

Fixed modifications: Carbamidomethyl (C) (apply to specified residues or termini only)

Variable modifications:

Q9 : Biotin:Thermo-21345 (Q)

Ions Score: 43 Expect: 0.00045

Matches : 13/112 fragment ions using 22 most intense peaks [\(help\)](#)

| #  | b                 | b <sup>++</sup> | b <sup>+</sup> | b <sup>+++</sup> | b <sup>0</sup> | b <sup>0++</sup> | Seq. | y                  | y <sup>++</sup> | y <sup>+</sup>     | y <sup>+++</sup> | y <sup>0</sup>     | y <sup>0++</sup> | #  |
|----|-------------------|-----------------|----------------|------------------|----------------|------------------|------|--------------------|-----------------|--------------------|------------------|--------------------|------------------|----|
| 1  | 102.054955        | 51.531116       |                |                  | 84.044390      | 42.525833        | T    |                    |                 |                    |                  |                    |                  | 11 |
| 2  | <b>230.113533</b> | 115.560405      | 213.086984     | 107.047130       | 212.102968     | 106.555122       | Q    | 1497.784225        | 749.395751      | 1480.757676        | 740.882476       | 1479.773660        | 740.390468       | 10 |
| 3  | <b>329.181947</b> | 165.094612      | 312.155398     | 156.581337       | 311.171382     | 156.089329       | V    | 1369.725647        | 685.366462      | 1352.699098        | 676.853187       | 1351.715082        | 676.361179       | 9  |
| 4  | 443.224874        | 222.116075      | 426.198325     | 213.602801       | 425.214309     | 213.110793       | N    | 1270.657233        | 635.832255      | 1253.630684        | 627.318980       | 1252.646668        | 626.826972       | 8  |
| 5  | 544.272553        | 272.639915      | 527.246004     | 264.126640       | 526.261988     | 263.634632       | T    | <b>1156.614306</b> | 578.810791      | 1139.587757        | 570.297517       | <b>1138.603741</b> | 569.805509       | 7  |
| 6  | 672.331131        | 336.669204      | 655.304582     | 328.155929       | 654.320566     | 327.663921       | Q    | <b>1055.566627</b> | 528.286951      | <b>1038.540078</b> | 519.773677       | 1037.556062        | 519.281669       | 6  |
| 7  | 743.368245        | 372.187761      | 726.341696     | 363.674486       | 725.357680     | 363.182478       | A    | <b>927.508049</b>  | 464.257663      | 910.481500         | 455.744388       | 909.497484         | 455.252380       | 5  |
| 8  | 872.410838        | 436.709057      | 855.384289     | 428.195783       | 854.400273     | 427.703775       | E    | <b>856.470935</b>  | 428.739106      | 839.444386         | 420.225831       | <b>838.460370</b>  | 419.733823       | 4  |
| 9  | 1311.636164       | 656.321720      | 1294.609615    | 647.808446       | 1293.625599    | 647.316438       | Q    | <b>727.428342</b>  | 364.217809      | <b>710.401793</b>  | 355.704535       |                    |                  | 3  |
| 10 | 1424.720228       | 712.863752      | 1407.693679    | 704.350478       | 1406.709663    | 703.858470       | L    | <b>288.203016</b>  | 144.605146      | 271.176467         | 136.091871       |                    |                  | 2  |
| 11 |                   |                 |                |                  |                |                  | R    | <b>175.118952</b>  | 88.063114       | 158.092403         | 79.549839        |                    |                  | 1  |

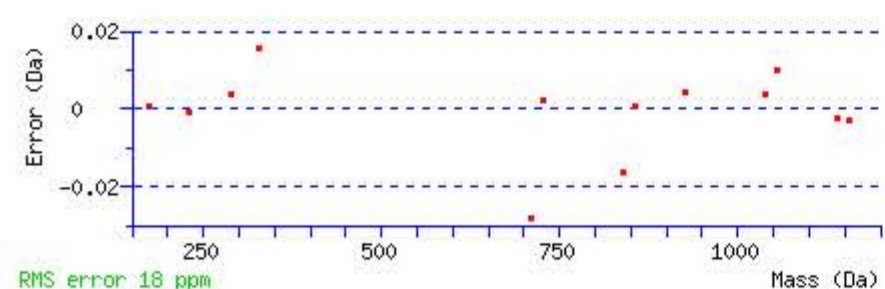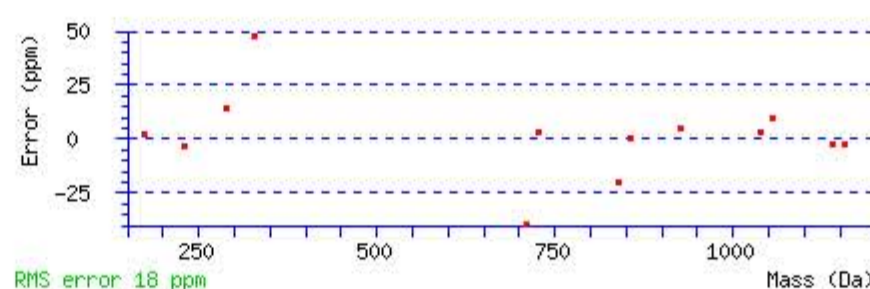

NCBI BLAST search of [TQVNTQAEQLR](#)

(Parameters: blastp, nr protein database, expect=20000, no filter, PAM30)

Other BLAST [web gateways](#)

All matches to this query

| Score | Mr(calc):   | Delta     | Sequence                       |
|-------|-------------|-----------|--------------------------------|
| 42.6  | 1597.824615 | -0.008943 | <a href="#">TQVNTQAEQLR</a>    |
| 9.6   | 1597.824615 | -0.008943 | <a href="#">TQVNTQAEQLR</a>    |
| 6.7   | 1597.835846 | -0.020174 | <a href="#">TKAAATAGGQGAAR</a> |
| 6.3   | 1597.828629 | -0.012957 | <a href="#">AWDILSGEQLR</a>    |
| 2.4   | 1597.797440 | 0.018232  | <a href="#">RYSHGGTSWRVHR</a>  |

Mascot: <http://www.matrixscience.com/>

# MASCOT Search Results

## Peptide View

MS/MS Fragmentation of **SLAPYAQDTQEK**

Found in **APOA4\_HUMAN**, Apolipoprotein A-IV OS=Homo sapiens GN=APOA4 PE=1 SV=3

Match to Query 32905: 1660.811428 from(831.412990,2+) rtinseconds(1758) index(30321)

Title: Locus:1.1.1.3275.19 File:"2013-07-02 CLN FXIII 180 min 3rd F 3.wiff"

Data file C:\Program Files (x86)\Matrix Science\Mascot Daemon\mgf9 FXIII 180 min 3rd\mascot\_daemon\_merge.mgf

Click mouse within plot area to zoom in by factor of two about that point

Or, Plot from  to  Da

Label all possible matches  Label matches used for scoring

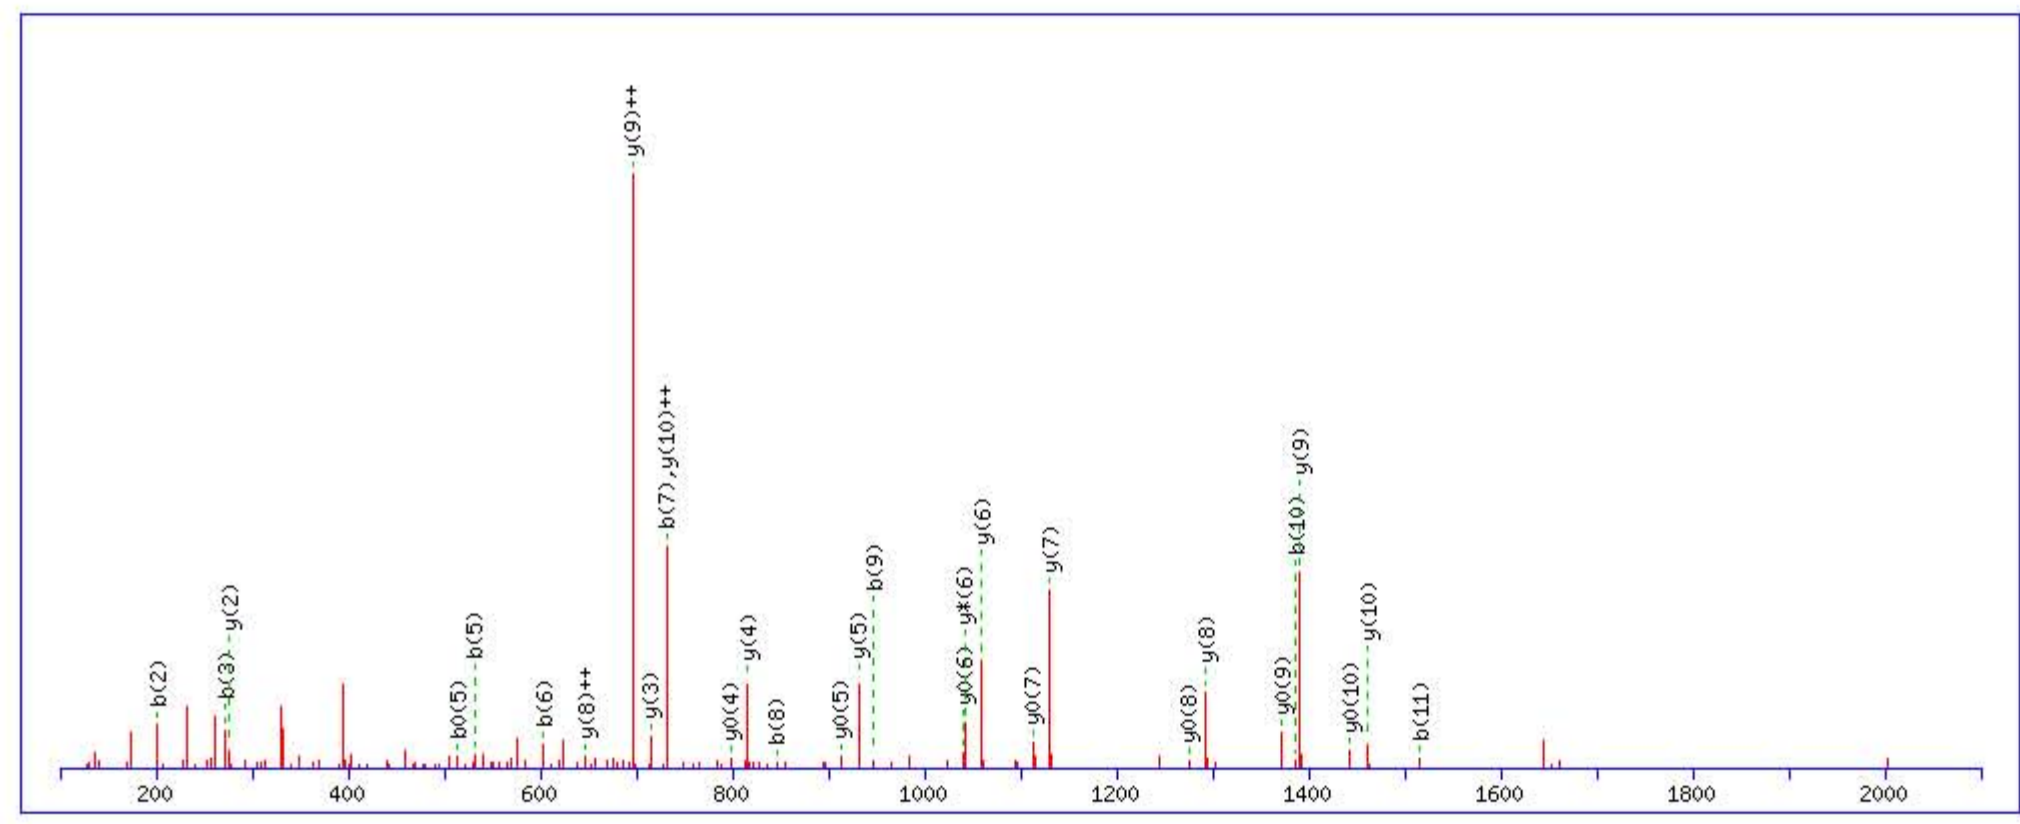

Monoisotopic mass of neutral peptide Mr(calc): 1660.813034

Fixed modifications: Carbamidomethyl (C) (apply to specified residues or termini only)

Variable modifications:

Q10 : Biotin:Thermo-21345 (Q)

Ions Score: 51 Expect: 8e-005

Matches : 30/118 fragment ions using 56 most intense peaks [\(help\)](#)

| #  | b                  | b <sup>++</sup> | b <sup>*</sup> | b <sup>*++</sup> | b <sup>0</sup>    | b <sup>0++</sup> | Seq. | y                  | y <sup>++</sup>   | y <sup>*</sup>     | y <sup>*++</sup> | y <sup>0</sup>     | y <sup>0++</sup> | #  |
|----|--------------------|-----------------|----------------|------------------|-------------------|------------------|------|--------------------|-------------------|--------------------|------------------|--------------------|------------------|----|
| 1  | 88.039304          | 44.523290       |                |                  | 70.028739         | 35.518008        | S    |                    |                   |                    |                  |                    |                  | 12 |
| 2  | <b>201.123368</b>  | 101.065322      |                |                  | 183.112803        | 92.060039        | L    | 1574.788308        | 787.897792        | 1557.761759        | 779.384518       | 1556.777743        | 778.892510       | 11 |
| 3  | <b>272.160482</b>  | 136.583879      |                |                  | 254.149917        | 127.578596       | A    | <b>1461.704244</b> | <b>731.355760</b> | 1444.677695        | 722.842486       | <b>1443.693679</b> | 722.350478       | 10 |
| 4  | 369.213246         | 185.110261      |                |                  | 351.202681        | 176.104978       | P    | <b>1390.667130</b> | <b>695.837203</b> | 1373.640581        | 687.323929       | <b>1372.656565</b> | 686.831921       | 9  |
| 5  | <b>532.276575</b>  | 266.641926      |                |                  | <b>514.266010</b> | 257.636643       | Y    | <b>1293.614366</b> | <b>647.310821</b> | 1276.587817        | 638.797547       | <b>1275.603801</b> | 638.305539       | 8  |
| 6  | <b>603.313689</b>  | 302.160483      |                |                  | 585.303124        | 293.155200       | A    | <b>1130.551037</b> | 565.779157        | 1113.524488        | 557.265882       | <b>1112.540472</b> | 556.773874       | 7  |
| 7  | <b>731.372267</b>  | 366.189772      | 714.345718     | 357.676497       | 713.361702        | 357.184489       | Q    | <b>1059.513923</b> | 530.260600        | <b>1042.487374</b> | 521.747325       | <b>1041.503358</b> | 521.255317       | 6  |
| 8  | <b>846.399210</b>  | 423.703243      | 829.372661     | 415.189969       | 828.388645        | 414.697961       | D    | <b>931.455345</b>  | 466.231311        | 914.428796         | 457.718036       | <b>913.444780</b>  | 457.226028       | 5  |
| 9  | <b>947.446889</b>  | 474.227083      | 930.420340     | 465.713808       | 929.436324        | 465.221800       | T    | <b>816.428402</b>  | 408.717839        | 799.401853         | 400.204565       | <b>798.417837</b>  | 399.712557       | 4  |
| 10 | <b>1386.672215</b> | 693.839746      | 1369.645666    | 685.326471       | 1368.661650       | 684.834463       | Q    | <b>715.380723</b>  | 358.194000        | 698.354174         | 349.680725       | 697.370158         | 349.188717       | 3  |
| 11 | <b>1515.714808</b> | 758.361042      | 1498.688259    | 749.847768       | 1497.704243       | 749.355760       | E    | <b>276.155397</b>  | 138.581337        | 259.128848         | 130.068062       | 258.144832         | 129.576054       | 2  |
| 12 |                    |                 |                |                  |                   |                  | K    | 147.112804         | 74.060040         | 130.086255         | 65.546765        |                    |                  | 1  |

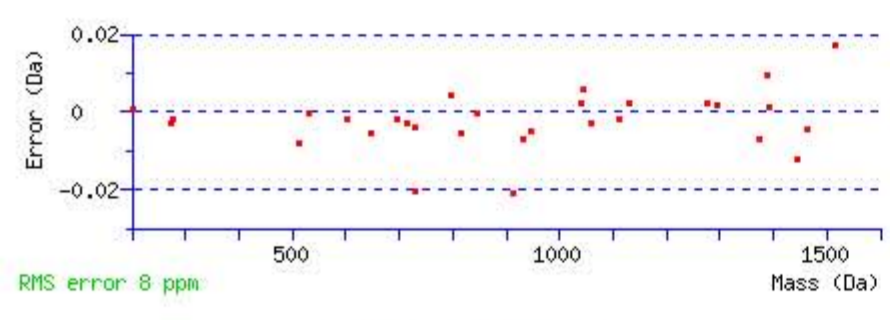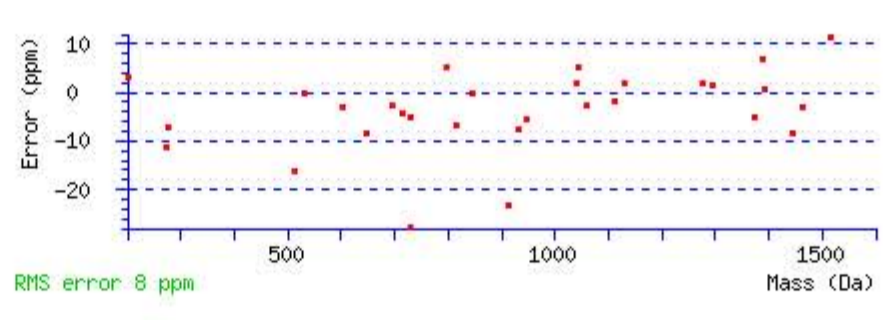

NCBI BLAST search of **SLAPYAQDTQEK**

(Parameters: blastp, nr protein database, expect=20000, no filter, PAM30)

Other BLAST [web gateways](#)

### All matches to this query

| Score | Mr(calc):   | Delta     | Sequence                         |
|-------|-------------|-----------|----------------------------------|
| 51.2  | 1660.813034 | -0.001606 | <a href="#">SLAPYAQDTQEK</a>     |
| 27.2  | 1660.813034 | -0.001606 | <a href="#">SLAPYAQDTQEK</a>     |
| 7.3   | 1660.826782 | -0.015354 | <a href="#">EAATQAQQTLGSTIDK</a> |
| 7.1   | 1660.820908 | -0.009480 | <a href="#">SLARAGFYITGVNDK</a>  |
| 2.5   | 1660.813019 | -0.001591 | <a href="#">EAALMAEFDNPNIK</a>   |

# MASCOT SEARCH RESULTS

## Peptide View

MS/MS Fragmentation of **LGEVNTYAGDLQK**

Found in **APOA4\_HUMAN**, Apolipoprotein A-IV OS=Homo sapiens GN=APOA4 PE=1 SV=3

Match to Query 33995: 1717.866628 from(859.940590,2+) rtinseconds(2013) index(19147)

Title: Locus:1.1.1.3266.15 File:"2013-07-02 CLN FXIII 180 min 3rd F 2.wiff"

Data file C:\Program Files (x86)\Matrix Science\Mascot Daemon\mgf\9 FXIII 180 min 3rd\mascot\_daemon\_merge.mgf

Click mouse within plot area to zoom in by factor of two about that point

Or, Plot from  to  Da

Label all possible matches  Label matches used for scoring

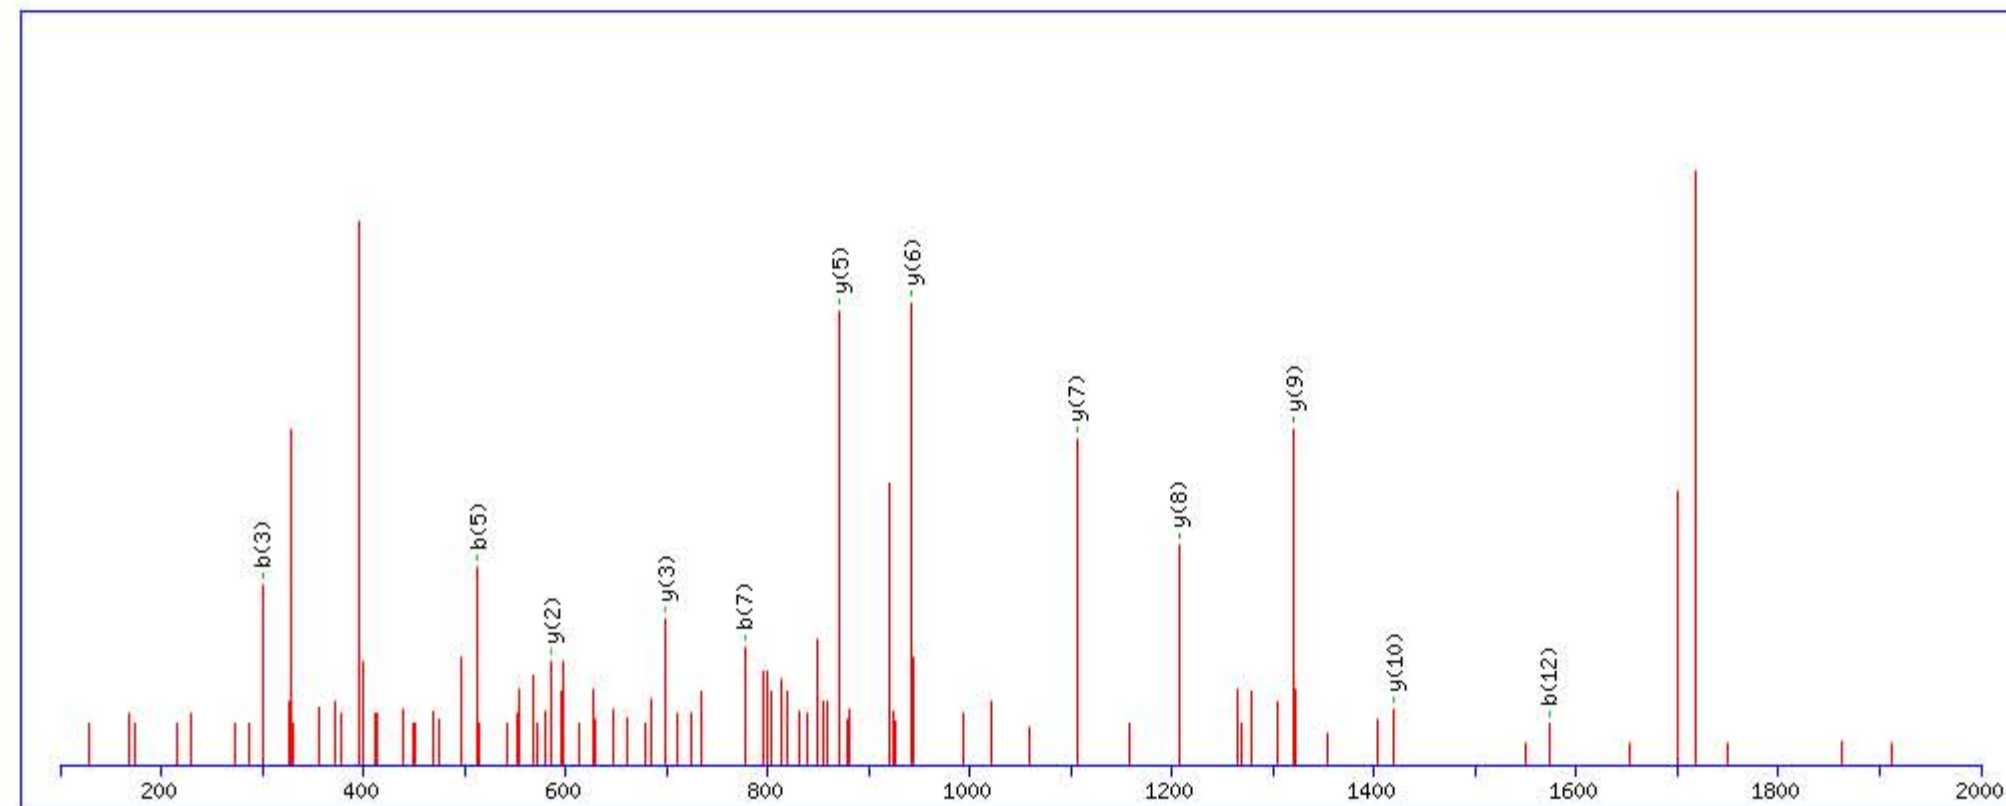

Monoisotopic mass of neutral peptide Mr(calc): 1717.870895

Fixed modifications: Carbamidomethyl (C) (apply to specified residues or termini only)

Variable modifications:

Q12 : Biotin:Thermo-21345 (Q)

Ions Score: 69 Expect: 3e-006

Matches : 12/126 fragment ions using 15 most intense peaks [\(help\)](#)

| #  | b                  | b <sup>++</sup> | b <sup>+</sup> | b <sup>+++</sup> | b <sup>0</sup> | b <sup>0++</sup> | Seq. | y                  | y <sup>++</sup> | y <sup>+</sup> | y <sup>+++</sup> | y <sup>0</sup> | y <sup>0++</sup> | #  |
|----|--------------------|-----------------|----------------|------------------|----------------|------------------|------|--------------------|-----------------|----------------|------------------|----------------|------------------|----|
| 1  | 114.091340         | 57.549308       |                |                  |                |                  | L    |                    |                 |                |                  |                |                  | 13 |
| 2  | 171.112804         | 86.060040       |                |                  |                |                  | G    | 1605.794121        | 803.400699      | 1588.767572    | 794.887424       | 1587.783556    | 794.395416       | 12 |
| 3  | <b>300.155397</b>  | 150.581336      |                |                  | 282.144832     | 141.576054       | E    | 1548.772657        | 774.889967      | 1531.746108    | 766.376692       | 1530.762092    | 765.884684       | 11 |
| 4  | 399.223811         | 200.115544      |                |                  | 381.213246     | 191.110261       | V    | <b>1419.730064</b> | 710.368670      | 1402.703515    | 701.855396       | 1401.719499    | 701.363388       | 10 |
| 5  | <b>513.266738</b>  | 257.137007      | 496.240189     | 248.623733       | 495.256173     | 248.131725       | N    | <b>1320.661650</b> | 660.834463      | 1303.635101    | 652.321189       | 1302.651085    | 651.829181       | 9  |
| 6  | 614.314417         | 307.660847      | 597.287868     | 299.147572       | 596.303852     | 298.655564       | T    | <b>1206.618723</b> | 603.813000      | 1189.592174    | 595.299725       | 1188.608158    | 594.807717       | 8  |
| 7  | <b>777.377746</b>  | 389.192511      | 760.351197     | 380.679237       | 759.367181     | 380.187229       | Y    | <b>1105.571044</b> | 553.289160      | 1088.544495    | 544.775886       | 1087.560479    | 544.283878       | 7  |
| 8  | 848.414860         | 424.711068      | 831.388311     | 416.197794       | 830.404295     | 415.705786       | A    | <b>942.507715</b>  | 471.757496      | 925.481166     | 463.244221       | 924.497150     | 462.752213       | 6  |
| 9  | 905.436324         | 453.221800      | 888.409775     | 444.708526       | 887.425759     | 444.216518       | G    | <b>871.470601</b>  | 436.238939      | 854.444052     | 427.725664       | 853.460036     | 427.233656       | 5  |
| 10 | 1020.463267        | 510.735272      | 1003.436718    | 502.221997       | 1002.452702    | 501.729989       | D    | 814.449137         | 407.728207      | 797.422588     | 399.214932       | 796.438572     | 398.722924       | 4  |
| 11 | 1133.547331        | 567.277304      | 1116.520782    | 558.764029       | 1115.536766    | 558.272021       | L    | <b>699.422194</b>  | 350.214735      | 682.395645     | 341.701461       |                |                  | 3  |
| 12 | <b>1572.772657</b> | 786.889967      | 1555.746108    | 778.376692       | 1554.762092    | 777.884684       | Q    | <b>586.338130</b>  | 293.672703      | 569.311581     | 285.159429       |                |                  | 2  |
| 13 |                    |                 |                |                  |                |                  | K    | 147.112804         | 74.060040       | 130.086255     | 65.546765        |                |                  | 1  |

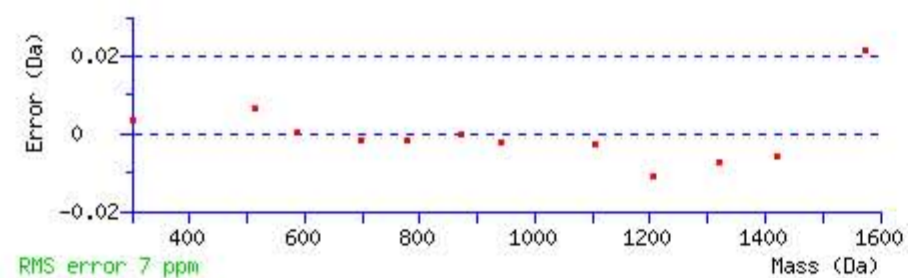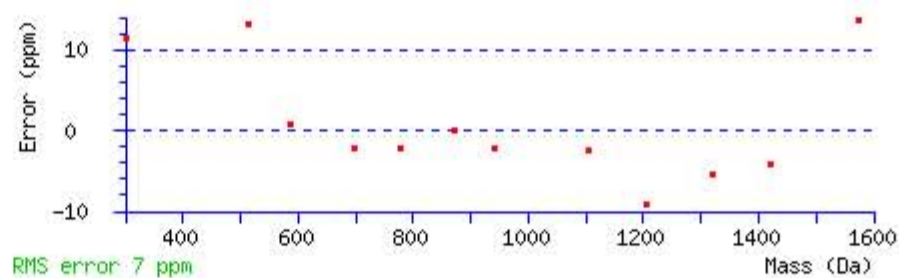

NCBI BLAST search of **LGEVNTYAGDLQK**

(Parameters: blastp, nr protein database, expect=20000, no filter, PAM30)

Other BLAST [web gateways](#)

All matches to this query

| Score | Mr(calc):   | Delta     | Sequence                        |
|-------|-------------|-----------|---------------------------------|
| 69.4  | 1717.870895 | -0.004267 | <a href="#">LGEVNTYAGDLQK</a>   |
| 10.3  | 1717.866867 | -0.000239 | <a href="#">IDAVNAETIREVCTK</a> |
| 1.6   | 1717.878754 | -0.012126 | <a href="#">IDAWAWNTTPYQLAR</a> |

Mascot: <http://www.matrixscience.com/>

# MASCOT SCIENCE Mascot Search Results

## Peptide View

MS/MS Fragmentation of **ALVQQMEQLR**

Found in **APOA4\_HUMAN**, Apolipoprotein A-IV OS=Homo sapiens GN=APOA4 PE=1 SV=3

Match to Query 36409: 1836.980232 from(613.334020,3+) rtinseconds(2353) index(62445)

Title: Locus:1.1.1.1731.3 File:"2013-07-02 CLN FXIII 180 min 3rd FT.wiff"

Data file C:\Program Files (x86)\Matrix Science\Mascot Daemon\mgf\9 FXIII 180 min 3rd\mascot\_daemon\_merge.mgf

Click mouse within plot area to zoom in by factor of two about that point

Or, Plot from  to  Da

Label all possible matches  Label matches used for scoring

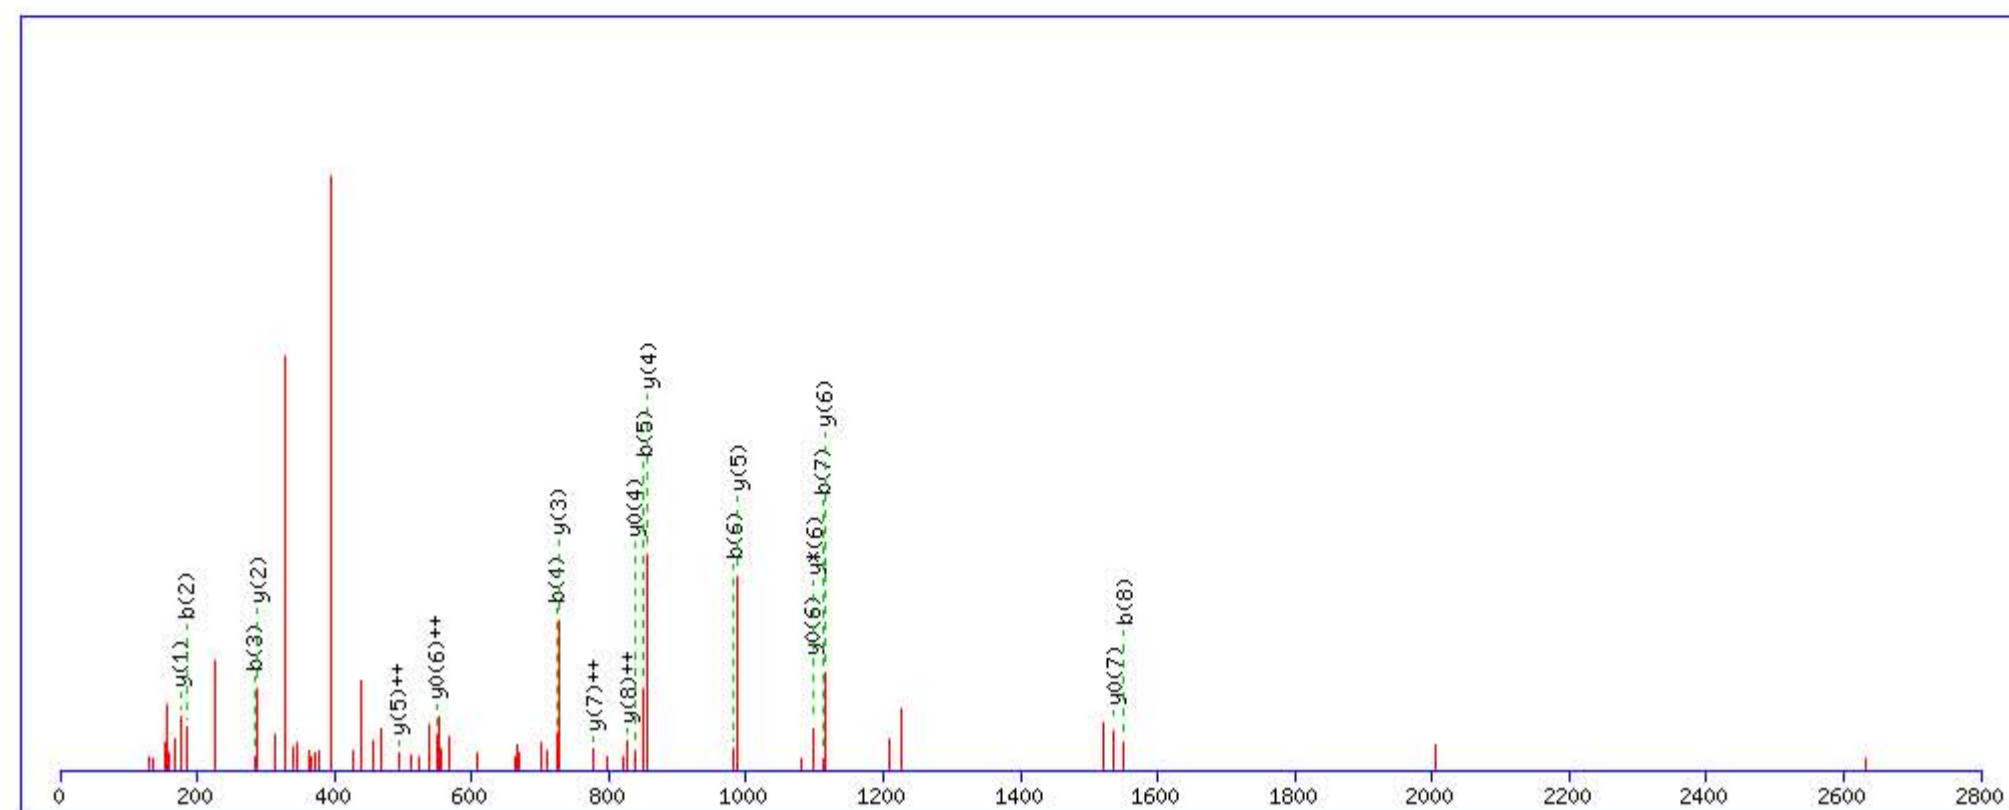

Monoisotopic mass of neutral peptide Mr(calc): 1836.977615

Fixed modifications: Carbamidomethyl (C) (apply to specified residues or termini only)

Variable modifications:

Q4 : Biotin:Thermo-21345 (Q)

Q8 : Biotin:Thermo-21345 (Q)

Ions Score: 29 Expect: 0.019

Matches : 21/84 fragment ions using 43 most intense peaks [\(help\)](#)

| #  | b                  | b <sup>++</sup> | b <sup>*</sup> | b <sup>+++</sup> | b <sup>0</sup> | b <sup>0++</sup> | Seq. | y                  | y <sup>++</sup>   | y <sup>*</sup>     | y <sup>+++</sup> | y <sup>0</sup>     | y <sup>0++</sup>  | #  |
|----|--------------------|-----------------|----------------|------------------|----------------|------------------|------|--------------------|-------------------|--------------------|------------------|--------------------|-------------------|----|
| 1  | 72.044390          | 36.525833       |                |                  |                |                  | A    |                    |                   |                    |                  |                    |                   | 10 |
| 2  | <b>185.128454</b>  | 93.067865       |                |                  |                |                  | L    | 1766.947802        | 883.977539        | 1749.921253        | 875.464265       | 1748.937237        | 874.972256        | 9  |
| 3  | <b>284.196868</b>  | 142.602072      |                |                  |                |                  | V    | 1653.863738        | <b>827.435507</b> | 1636.837189        | 818.922232       | 1635.853173        | 818.430224        | 8  |
| 4  | <b>723.422194</b>  | 362.214735      | 706.395645     | 353.701461       |                |                  | Q    | 1554.795324        | <b>777.901300</b> | 1537.768775        | 769.388026       | <b>1536.784759</b> | 768.896017        | 7  |
| 5  | <b>851.480772</b>  | 426.244024      | 834.454223     | 417.730750       |                |                  | Q    | <b>1115.569998</b> | 558.288637        | <b>1098.543449</b> | 549.775363       | <b>1097.559433</b> | <b>549.283354</b> | 6  |
| 6  | <b>982.521257</b>  | 491.764267      | 965.494708     | 483.250992       |                |                  | M    | <b>987.511420</b>  | <b>494.259348</b> | 970.484871         | 485.746073       | 969.500855         | 485.254065        | 5  |
| 7  | <b>1111.563850</b> | 556.285563      | 1094.537301    | 547.772289       | 1093.553285    | 547.280281       | E    | <b>856.470935</b>  | 428.739105        | 839.444386         | 420.225831       | <b>838.460370</b>  | 419.733823        | 4  |
| 8  | <b>1550.789176</b> | 775.898226      | 1533.762627    | 767.384952       | 1532.778611    | 766.892944       | Q    | <b>727.428342</b>  | 364.217809        | 710.401793         | 355.704534       |                    |                   | 3  |
| 9  | 1663.873240        | 832.440258      | 1646.846691    | 823.926984       | 1645.862675    | 823.434975       | L    | <b>288.203016</b>  | 144.605146        | 271.176467         | 136.091871       |                    |                   | 2  |
| 10 |                    |                 |                |                  |                |                  | R    | <b>175.118952</b>  | 88.063114         | 158.092403         | 79.549839        |                    |                   | 1  |

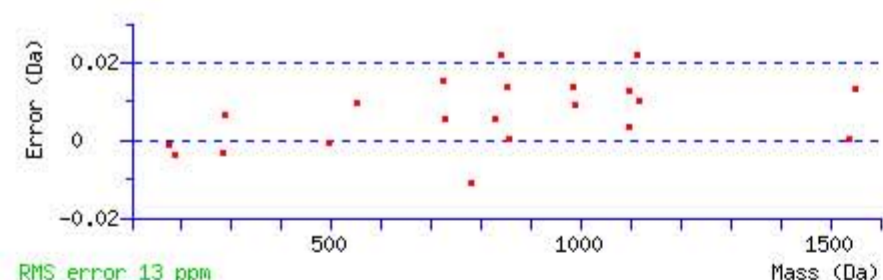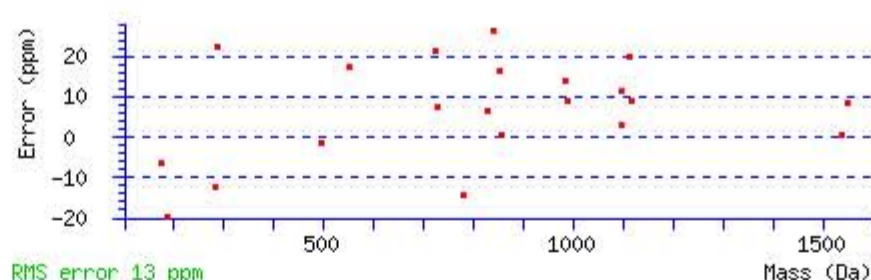

NCBI BLAST search of **ALVQQMEQLR**

(Parameters: blastp, nr protein database, expect=20000, no filter, PAM30)

Other BLAST [web gateways](#)

All matches to this query

| Score | Mr(calc):   | Delta     | Sequence                     |
|-------|-------------|-----------|------------------------------|
| 29.0  | 1836.977615 | 0.002617  | <a href="#">ALVQQMEQLR</a>   |
| 19.4  | 1836.977615 | 0.002617  | <a href="#">ALVQQMEQLR</a>   |
| 10.0  | 1836.999207 | -0.018975 | <a href="#">QQSLQRQLEQLR</a> |
| 5.8   | 1837.004578 | -0.024346 | <a href="#">RHSWRQQIFLR</a>  |
| 2.2   | 1836.977615 | 0.002617  | <a href="#">ALVQQMEQLR</a>   |
| 0.1   | 1836.958984 | 0.021248  | <a href="#">ALTEQQEQLR</a>   |
| 0.1   | 1836.958984 | 0.021248  | <a href="#">ALTEQQEQLR</a>   |



# MASCOT SEARCH RESULTS

## Peptide View

MS/MS Fragmentation of **LNHQLEGLTFQMK**

Found in **APOA4\_HUMAN**, Apolipoprotein A-IV OS=Homo sapiens GN=APOA4 PE=1 SV=3

Match to Query 37009: 1868.960952 from(623.994260,3+) rtinseconds(2172) index(32869)

Title: Locus:1.1.1.3420.10 File:"2013-07-02 CLN FXIII 180 min 3rd F 3.wiff"

Data file C:\Program Files (x86)\Matrix Science\Mascot Daemon\mgf\9 FXIII 180 min 3rd\mascot\_daemon\_merge.mgf

Click mouse within plot area to zoom in by factor of two about that point

Or, Plot from  to  Da

Label all possible matches  Label matches used for scoring

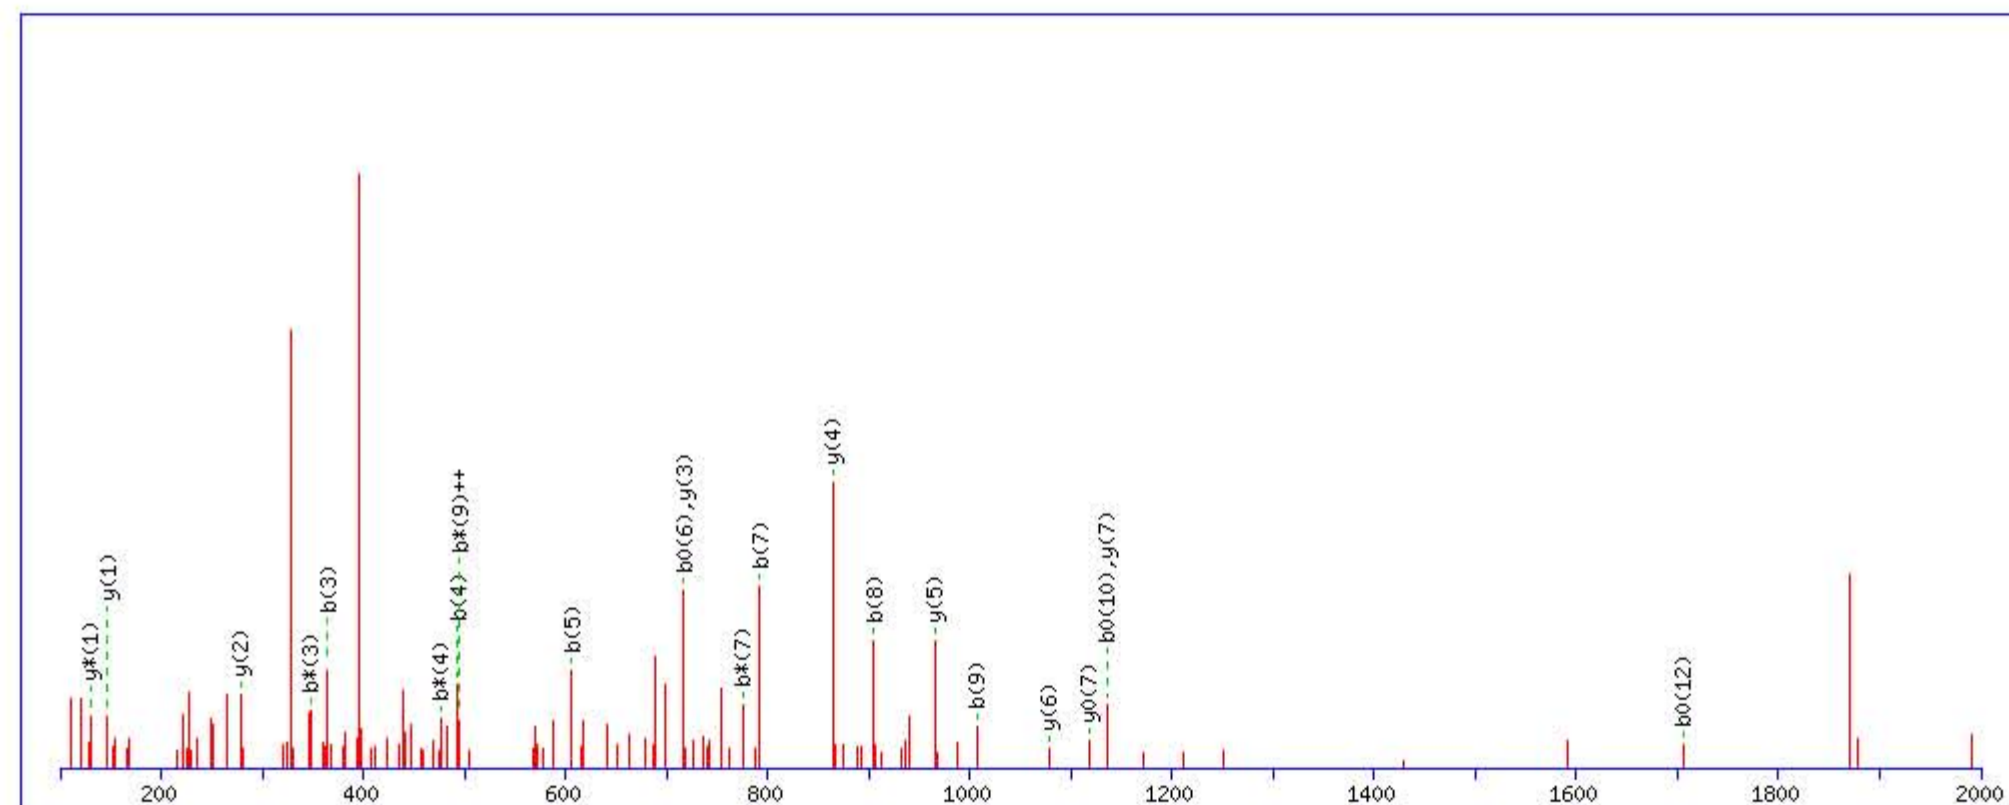

Monoisotopic mass of neutral peptide Mr(calc): 1868.964081

Fixed modifications: Carbamidomethyl (C) (apply to specified residues or termini only)

Variable modifications:

Q11 : Biotin:Thermo-21345 (Q)

Ions Score: 32 Expect: 0.015

Matches : 22/124 fragment ions using 45 most intense peaks [\(help\)](#)

| #  | b                  | b <sup>++</sup> | b <sup>*</sup>    | b <sup>*++</sup>  | b <sup>0</sup>     | b <sup>0++</sup> | Seq. | y                  | y <sup>++</sup> | y <sup>*</sup>    | y <sup>*++</sup> | y <sup>0</sup>     | y <sup>0++</sup> | #  |
|----|--------------------|-----------------|-------------------|-------------------|--------------------|------------------|------|--------------------|-----------------|-------------------|------------------|--------------------|------------------|----|
| 1  | 114.091340         | 57.549308       |                   |                   |                    |                  | L    |                    |                 |                   |                  |                    |                  | 13 |
| 2  | 228.134267         | 114.570771      | 211.107718        | 106.057497        |                    |                  | N    | 1756.887310        | 878.947293      | 1739.860761       | 870.434019       | 1738.876745        | 869.942011       | 12 |
| 3  | <b>365.193179</b>  | 183.100227      | <b>348.166630</b> | 174.586953        |                    |                  | H    | 1642.844383        | 821.925830      | 1625.817834       | 813.412555       | 1624.833818        | 812.920547       | 11 |
| 4  | <b>493.251757</b>  | 247.129516      | <b>476.225208</b> | 238.616242        |                    |                  | Q    | 1505.785471        | 753.396374      | 1488.758922       | 744.883099       | 1487.774906        | 744.391091       | 10 |
| 5  | <b>606.335821</b>  | 303.671549      | 589.309272        | 295.158274        |                    |                  | L    | 1377.726893        | 689.367085      | 1360.700344       | 680.853810       | 1359.716328        | 680.361802       | 9  |
| 6  | 735.378414         | 368.192845      | 718.351865        | 359.679571        | <b>717.367849</b>  | 359.187563       | E    | 1264.642829        | 632.825053      | 1247.616280       | 624.311778       | 1246.632264        | 623.819770       | 8  |
| 7  | <b>792.399878</b>  | 396.703577      | <b>775.373329</b> | 388.190303        | 774.389313         | 387.698295       | G    | <b>1135.600236</b> | 568.303756      | 1118.573687       | 559.790482       | <b>1117.589671</b> | 559.298474       | 7  |
| 8  | <b>905.483942</b>  | 453.245609      | 888.457393        | 444.732335        | 887.473377         | 444.240327       | L    | <b>1078.578772</b> | 539.793024      | 1061.552223       | 531.279750       | 1060.568207        | 530.787742       | 6  |
| 9  | <b>1006.531621</b> | 503.769449      | 989.505072        | <b>495.256174</b> | 988.521056         | 494.764166       | T    | <b>965.494708</b>  | 483.250992      | 948.468159        | 474.737718       | 947.484143         | 474.245710       | 5  |
| 10 | 1153.600035        | 577.303656      | 1136.573486       | 568.790381        | <b>1135.589470</b> | 568.298373       | F    | <b>864.447029</b>  | 432.727153      | 847.420480        | 424.213878       |                    |                  | 4  |
| 11 | 1592.825361        | 796.916319      | 1575.798812       | 788.403044        | 1574.814796        | 787.911036       | Q    | <b>717.378615</b>  | 359.192946      | 700.352066        | 350.679671       |                    |                  | 3  |
| 12 | 1723.865846        | 862.436561      | 1706.839297       | 853.923287        | <b>1705.855281</b> | 853.431279       | M    | <b>278.153289</b>  | 139.580282      | 261.126740        | 131.067008       |                    |                  | 2  |
| 13 |                    |                 |                   |                   |                    |                  | K    | <b>147.112804</b>  | 74.060040       | <b>130.086255</b> | 65.546765        |                    |                  | 1  |

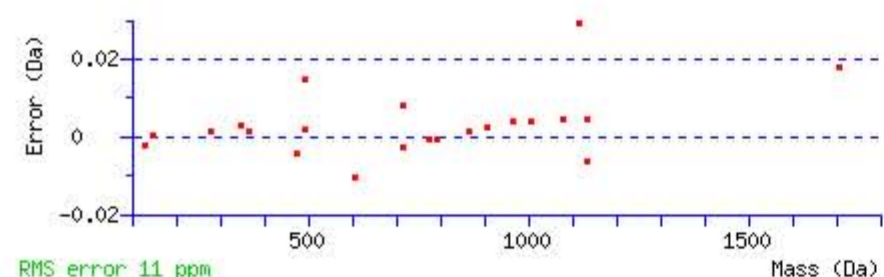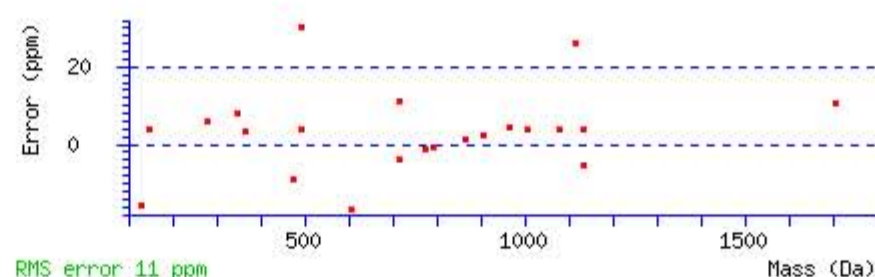

NCBI BLAST search of **LNHQLEGLTFQMK**

(Parameters: blastp, nr protein database, expect=20000, no filter, PAM30)

Other BLAST [web gateways](#)

All matches to this query

| Score | Mr(calc):   | Delta     | Sequence                      |
|-------|-------------|-----------|-------------------------------|
| 32.4  | 1868.964081 | -0.003129 | <a href="#">LNHQLEGLTFQMK</a> |

Mascot: <http://www.matrixscience.com/>

# MASCOT SCIENCE Mascot Search Results

## Peptide View

MS/MS Fragmentation of **TQVNTQAEQLR**

Found in **APOA4\_HUMAN**, Apolipoprotein A-IV OS=Homo sapiens GN=APOA4 PE=1 SV=3

Match to Query 37579: 1908.985362 from(637.335730,3+) rtinseconds(1949) index(31461)

Title: Locus:1.1.1.3342.16 File:"2013-07-02 CLN FXIII 180 min 3rd F 3.wiff"

Data file C:\Program Files (x86)\Matrix Science\Mascot Daemon\mgf\9 FXIII 180 min 3rd\mascot\_daemon\_merge.mgf

Click mouse within plot area to zoom in by factor of two about that point

Or, Plot from  to  Da

Label all possible matches  Label matches used for scoring

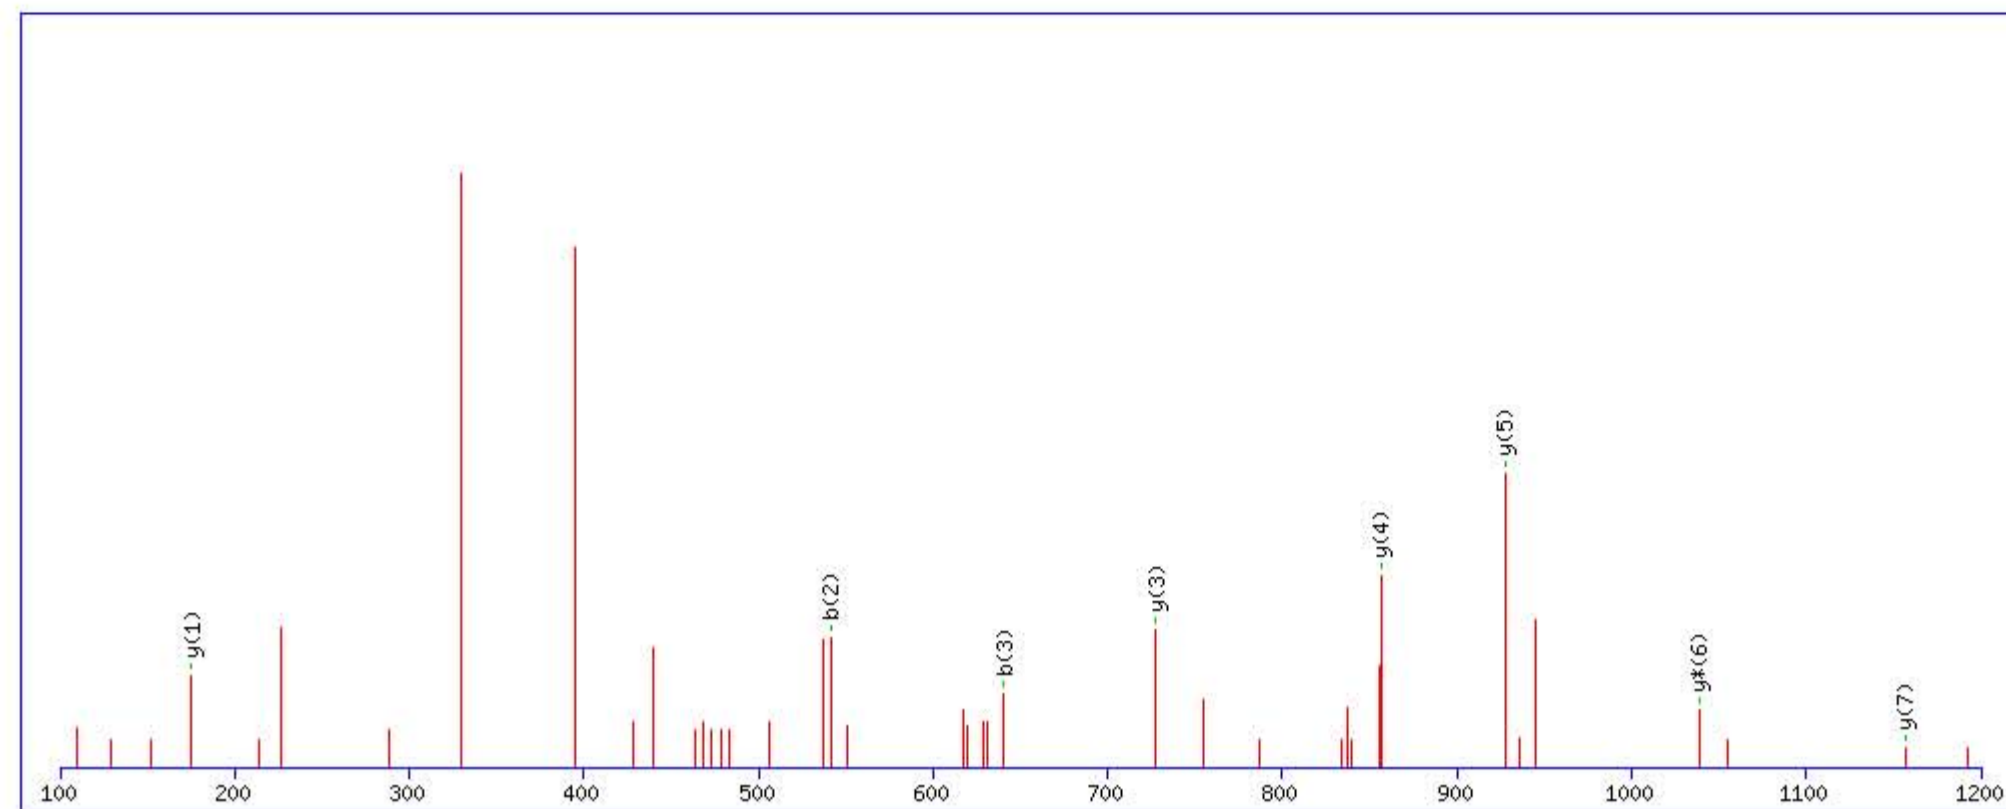

Monoisotopic mass of neutral peptide Mr(calc): 1908.991364

Fixed modifications: Carbamidomethyl (C) (apply to specified residues or termini only)

Variable modifications:

Q2 : Biotin:Thermo-21345 (Q)

Q9 : Biotin:Thermo-21345 (Q)

Ions Score: 30 Expect: 0.0027

Matches : 8/112 fragment ions using 11 most intense peaks [\(help\)](#)

| #  | b                 | b <sup>++</sup> | b <sup>*</sup> | b <sup>+++</sup> | b <sup>0</sup> | b <sup>0++</sup> | Seq. | y                  | y <sup>++</sup> | y <sup>*</sup>     | y <sup>+++</sup> | y <sup>0</sup> | y <sup>0++</sup> | #  |
|----|-------------------|-----------------|----------------|------------------|----------------|------------------|------|--------------------|-----------------|--------------------|------------------|----------------|------------------|----|
| 1  | 102.054955        | 51.531116       |                |                  | 84.044390      | 42.525833        | T    |                    |                 |                    |                  |                |                  | 11 |
| 2  | <b>541.280281</b> | 271.143779      | 524.253732     | 262.630504       | 523.269716     | 262.138496       | Q    | 1808.950973        | 904.979125      | 1791.924424        | 896.465850       | 1790.940408    | 895.973842       | 10 |
| 3  | <b>640.348695</b> | 320.677986      | 623.322146     | 312.164711       | 622.338130     | 311.672703       | V    | 1369.725647        | 685.366462      | 1352.699098        | 676.853187       | 1351.715082    | 676.361179       | 9  |
| 4  | 754.391622        | 377.699449      | 737.365073     | 369.186174       | 736.381057     | 368.694166       | N    | 1270.657233        | 635.832255      | 1253.630684        | 627.318980       | 1252.646668    | 626.826972       | 8  |
| 5  | 855.439301        | 428.223289      | 838.412752     | 419.710014       | 837.428736     | 419.218006       | T    | <b>1156.614306</b> | 578.810791      | 1139.587757        | 570.297517       | 1138.603741    | 569.805509       | 7  |
| 6  | 983.497879        | 492.252578      | 966.471330     | 483.739303       | 965.487314     | 483.247295       | Q    | 1055.566627        | 528.286952      | <b>1038.540078</b> | 519.773677       | 1037.556062    | 519.281669       | 6  |
| 7  | 1054.534993       | 527.771135      | 1037.508444    | 519.257860       | 1036.524428    | 518.765852       | A    | <b>927.508049</b>  | 464.257663      | 910.481500         | 455.744388       | 909.497484     | 455.252380       | 5  |
| 8  | 1183.577586       | 592.292431      | 1166.551037    | 583.779157       | 1165.567021    | 583.287149       | E    | <b>856.470935</b>  | 428.739106      | 839.444386         | 420.225831       | 838.460370     | 419.733823       | 4  |
| 9  | 1622.802912       | 811.905094      | 1605.776363    | 803.391820       | 1604.792347    | 802.899812       | Q    | <b>727.428342</b>  | 364.217809      | 710.401793         | 355.704535       |                |                  | 3  |
| 10 | 1735.886976       | 868.447126      | 1718.860427    | 859.933852       | 1717.876411    | 859.441844       | L    | 288.203016         | 144.605146      | 271.176467         | 136.091871       |                |                  | 2  |
| 11 |                   |                 |                |                  |                |                  | R    | <b>175.118952</b>  | 88.063114       | 158.092403         | 79.549839        |                |                  | 1  |

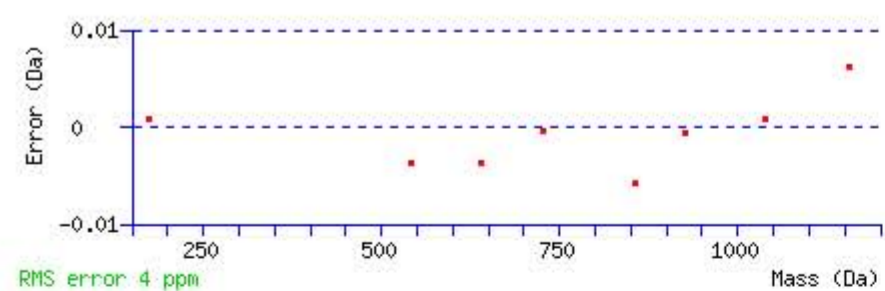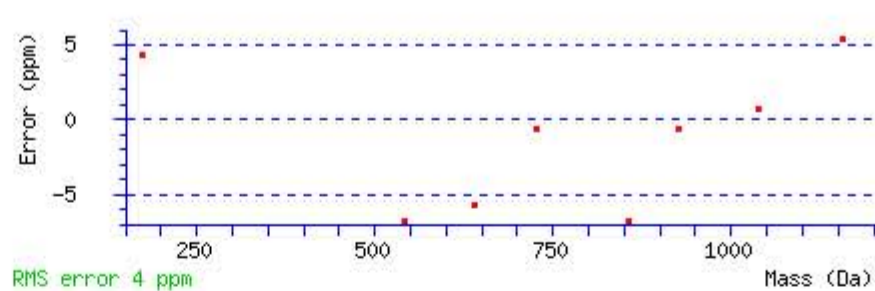

NCBI BLAST search of **TQVNTQAEQLR**

(Parameters: blastp, nr protein database, expect=20000, no filter, PAM30)

Other BLAST [web gateways](#)

All matches to this query

| Score | Mr(calc):   | Delta     | Sequence                         |
|-------|-------------|-----------|----------------------------------|
| 29.7  | 1908.991364 | -0.006002 | <a href="#">TQVNTQAEQLR</a>      |
| 15.7  | 1908.991364 | -0.006002 | <a href="#">TQVNTQAEQLR</a>      |
| 8.3   | 1908.991364 | -0.006002 | <a href="#">TQVNTQAEQLR</a>      |
| 2.3   | 1908.974045 | 0.011317  | <a href="#">SAQWAINRVAMEIQHR</a> |

# MASCOT SCIENCE Mascot Search Results

## Peptide View

MS/MS Fragmentation of **SLAELGGHLDQQVEEFR**

Found in **APOA4\_HUMAN**, Apolipoprotein A-IV OS=Homo sapiens GN=APOA4 PE=1 SV=3

Match to Query 43906: 2238.107292 from(747.043040,3+) rtinseconds(2262) index(33454)

Title: Locus:1.1.1.3451.19 File:"2013-07-02 CLN FXIII 180 min 3rd F 3.wiff"

Data file C:\Program Files (x86)\Matrix Science\Mascot Daemon\mgf\9 FXIII 180 min 3rd\mascot\_daemon\_merge.mgf

Click mouse within plot area to zoom in by factor of two about that point

Or, Plot from  to  Da

Label all possible matches  Label matches used for scoring

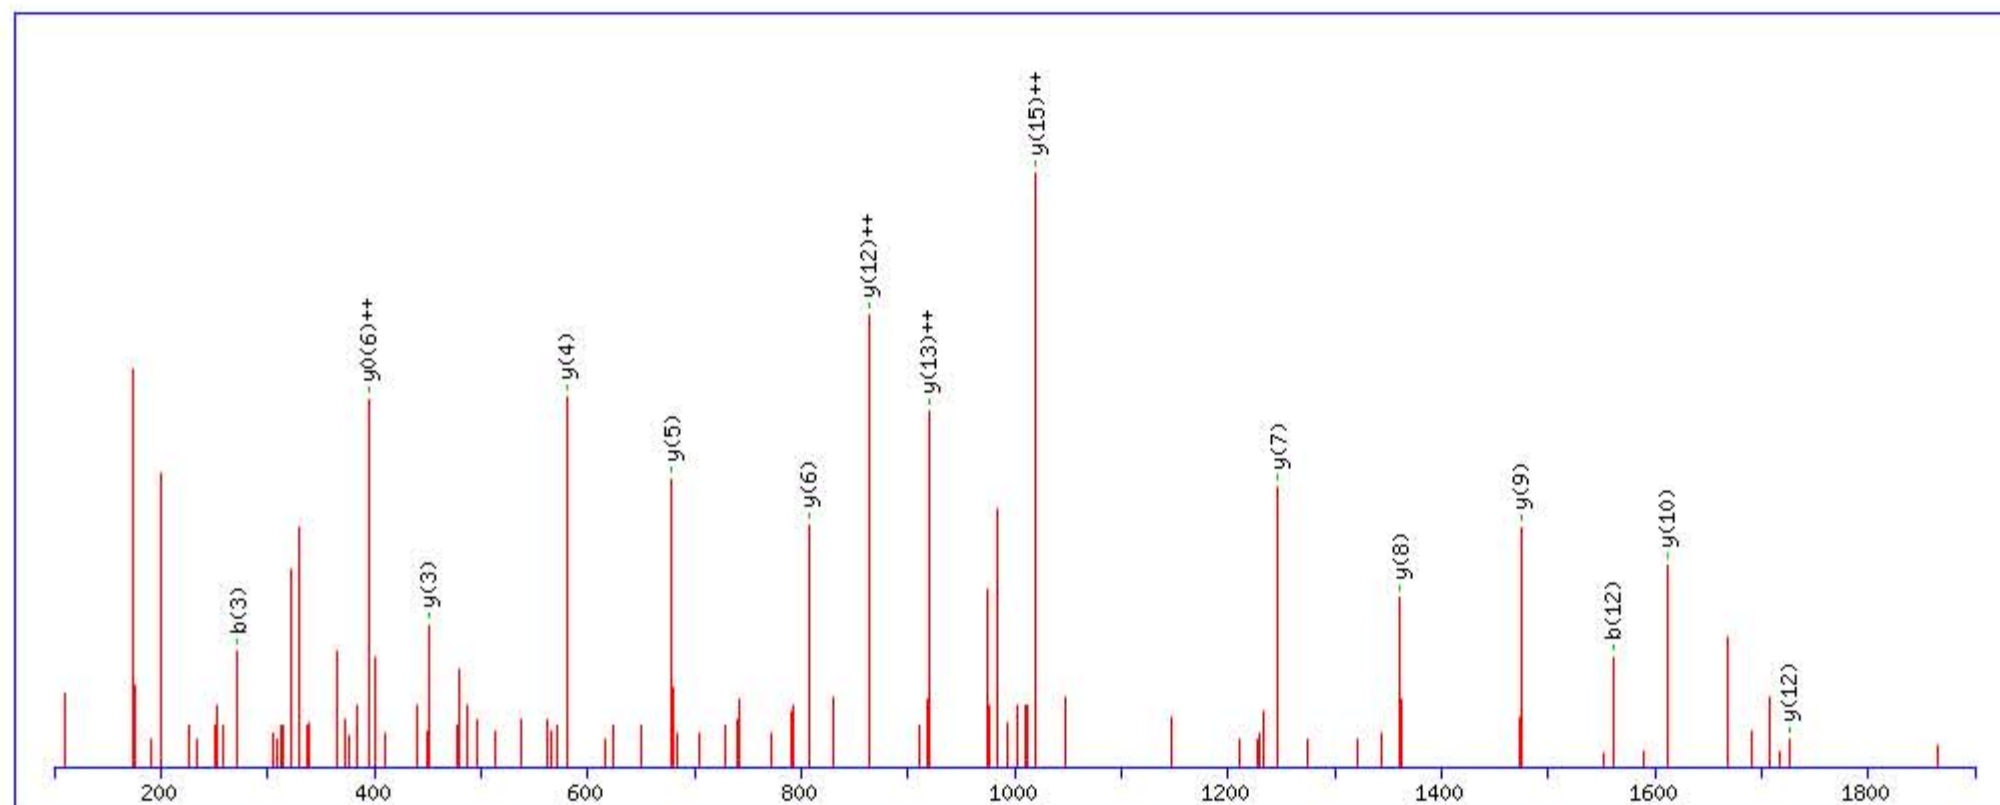

Monoisotopic mass of neutral peptide Mr(calc): 2238.110291

Fixed modifications: Carbamidomethyl (C) (apply to specified residues or termini only)

Variable modifications:

Q11 : Biotin:Thermo-21345 (Q)

Ions Score: 72 Expect: 1.6e-006

Matches : 15/168 fragment ions using 18 most intense peaks [\(help\)](#)

| #  | b                  | b <sup>++</sup> | b <sup>*</sup> | b <sup>***</sup> | b <sup>0</sup> | b <sup>0++</sup> | Seq. | y                  | y <sup>++</sup>    | y <sup>*</sup> | y <sup>***</sup> | y <sup>0</sup> | y <sup>0++</sup>  | #  |
|----|--------------------|-----------------|----------------|------------------|----------------|------------------|------|--------------------|--------------------|----------------|------------------|----------------|-------------------|----|
| 1  | 88.039304          | 44.523290       |                |                  | 70.028739      | 35.518008        | S    |                    |                    |                |                  |                |                   | 17 |
| 2  | 201.123368         | 101.065322      |                |                  | 183.112803     | 92.060039        | L    | 2152.085552        | 1076.546414        | 2135.059003    | 1068.033139      | 2134.074987    | 1067.541131       | 16 |
| 3  | <b>272.160482</b>  | 136.583879      |                |                  | 254.149917     | 127.578596       | A    | 2039.001488        | <b>1020.004382</b> | 2021.974939    | 1011.491108      | 2020.990923    | 1010.999100       | 15 |
| 4  | 401.203075         | 201.105175      |                |                  | 383.192510     | 192.099893       | E    | 1967.964374        | 984.485825         | 1950.937825    | 975.972551       | 1949.953809    | 975.480543        | 14 |
| 5  | 514.287139         | 257.647208      |                |                  | 496.276574     | 248.641925       | L    | 1838.921781        | <b>919.964529</b>  | 1821.895232    | 911.451254       | 1820.911216    | 910.959246        | 13 |
| 6  | 571.308603         | 286.157940      |                |                  | 553.298038     | 277.152657       | G    | <b>1725.837717</b> | <b>863.422497</b>  | 1708.811168    | 854.909222       | 1707.827152    | 854.417214        | 12 |
| 7  | 628.330067         | 314.668672      |                |                  | 610.319502     | 305.663389       | G    | 1668.816253        | 834.911765         | 1651.789704    | 826.398490       | 1650.805688    | 825.906482        | 11 |
| 8  | 765.388979         | 383.198128      |                |                  | 747.378414     | 374.192845       | H    | <b>1611.794789</b> | 806.401033         | 1594.768240    | 797.887758       | 1593.784224    | 797.395750        | 10 |
| 9  | 878.473043         | 439.740160      |                |                  | 860.462478     | 430.734877       | L    | <b>1474.735877</b> | 737.871577         | 1457.709328    | 729.358302       | 1456.725312    | 728.866294        | 9  |
| 10 | 993.499986         | 497.253631      |                |                  | 975.489421     | 488.248349       | D    | <b>1361.651813</b> | 681.329545         | 1344.625264    | 672.816270       | 1343.641248    | 672.324262        | 8  |
| 11 | 1432.725312        | 716.866294      | 1415.698763    | 708.353020       | 1414.714747    | 707.861012       | Q    | <b>1246.624870</b> | 623.816073         | 1229.598321    | 615.302799       | 1228.614305    | 614.810791        | 7  |
| 12 | <b>1560.783890</b> | 780.895583      | 1543.757341    | 772.382309       | 1542.773325    | 771.890301       | Q    | <b>807.399544</b>  | 404.203410         | 790.372995     | 395.690136       | 789.388979     | <b>395.198128</b> | 6  |
| 13 | 1659.852304        | 830.429790      | 1642.825755    | 821.916516       | 1641.841739    | 821.424508       | V    | <b>679.340966</b>  | 340.174121         | 662.314417     | 331.660846       | 661.330401     | 331.168838        | 5  |
| 14 | 1788.894897        | 894.951087      | 1771.868348    | 886.437812       | 1770.884332    | 885.945804       | E    | <b>580.272552</b>  | 290.639914         | 563.246003     | 282.126639       | 562.261987     | 281.634631        | 4  |
| 15 | 1917.937490        | 959.472383      | 1900.910941    | 950.959109       | 1899.926925    | 950.467101       | E    | <b>451.229959</b>  | 226.118617         | 434.203410     | 217.605343       | 433.219394     | 217.113335        | 3  |
| 16 | 2065.005904        | 1033.006590     | 2047.979355    | 1024.493316      | 2046.995339    | 1024.001307      | F    | 322.187366         | 161.597321         | 305.160817     | 153.084046       |                |                   | 2  |
| 17 |                    |                 |                |                  |                |                  | R    | 175.118952         | 88.063114          | 158.092403     | 79.549839        |                |                   | 1  |

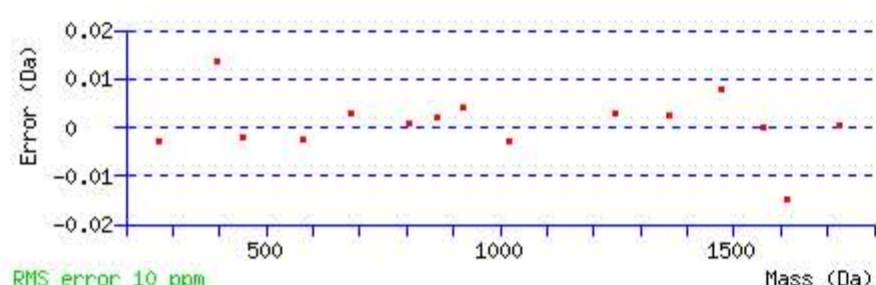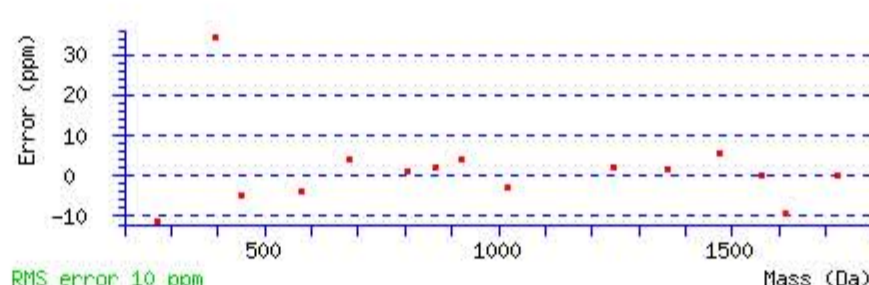

NCBI BLAST search of [SLAELGGHLDQQVEEFR](#)

(Parameters: blastp, nr protein database, expect=20000, no filter, PAM30)

Other BLAST [web gateways](#)

### All matches to this query

| Score | Mr(calc):   | Delta     | Sequence                          |
|-------|-------------|-----------|-----------------------------------|
| 72.3  | 2238.110291 | -0.002999 | <a href="#">SLAELGGHLDQQVEEFR</a> |
| 54.5  | 2238.110291 | -0.002999 | <a href="#">SLAELGGHLDQQVEEFR</a> |

**MASCOT** **SCIENCE** Mascot Search Results

Peptide View

MS/MS Fragmentation of **ENADSLQASLRPHADELK**

Found in **APOA4\_HUMAN**, Apolipoprotein A-IV OS=Homo sapiens GN=APOA4 PE=1 SV=3

Match to Query 45156: 2304.165372 from(769.062400,3+) rtinseconds(1904) index(59894)  
 Title: Locus:1.1.1.1574.17 File:"2013-07-02 CLN FXIII 180 min 3rd FT.wiff"  
 Data file C:\Program Files (x86)\Matrix Science\Mascot Daemon\mgf\9 FXIII 180 min 3rd\mascot\_daemon\_merge.mgf

Click mouse within plot area to zoom in by factor of two about that point

Or, Plot from  to  Da

Label all possible matches  Label matches used for scoring

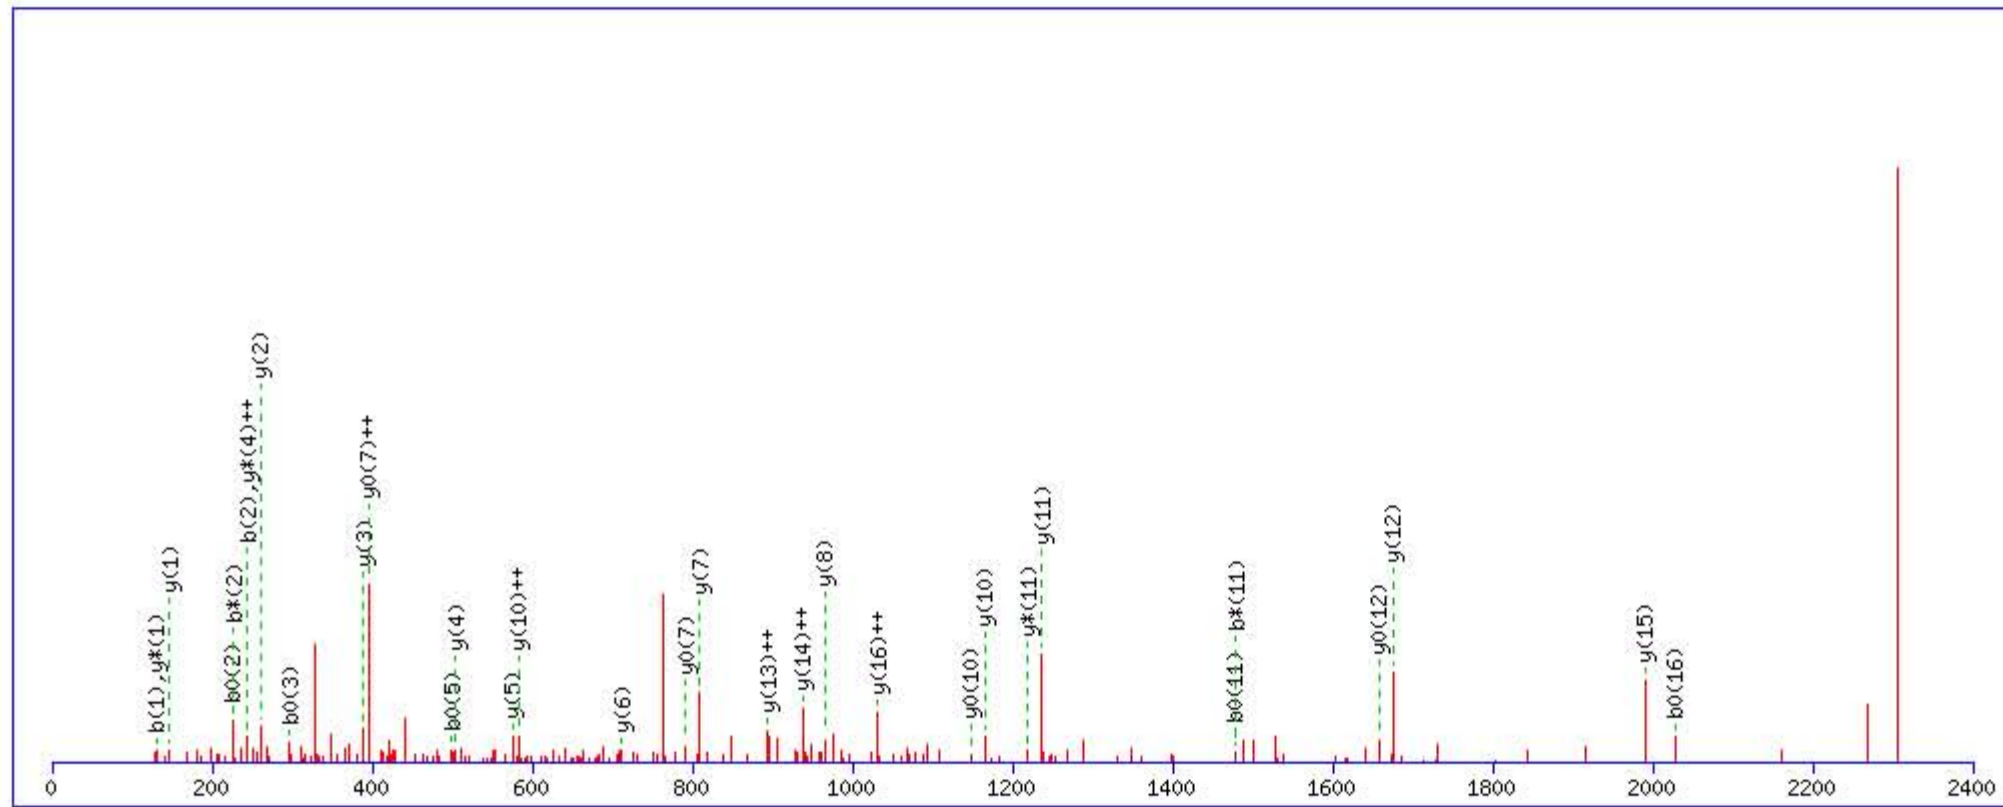

Monoisotopic mass of neutral peptide Mr(calc): 2304.153183  
 Fixed modifications: Carbamidomethyl (C) (apply to specified residues or termini only)  
 Variable modifications:  
 Q7 : Biotin:Thermo-21345 (Q)  
 Ions Score: 40 Expect: 0.0026  
 Matches : 32/198 fragment ions using 90 most intense peaks [\(help\)](#)

| #  | b           | b <sup>++</sup> | b <sup>*</sup> | b <sup>*++</sup> | b <sup>0</sup> | b <sup>0++</sup> | Seq. | y           | y <sup>++</sup> | y <sup>*</sup> | y <sup>*++</sup> | y <sup>0</sup> | y <sup>0++</sup> | #  |
|----|-------------|-----------------|----------------|------------------|----------------|------------------|------|-------------|-----------------|----------------|------------------|----------------|------------------|----|
| 1  | 130.049869  | 65.528572       |                |                  | 112.039304     | 56.523290        | E    |             |                 |                |                  |                |                  | 18 |
| 2  | 244.092796  | 122.550036      | 227.066247     | 114.036762       | 226.082231     | 113.544754       | N    | 2176.117913 | 1088.562594     | 2159.091364    | 1080.049320      | 2158.107348    | 1079.557312      | 17 |
| 3  | 315.129910  | 158.068593      | 298.103361     | 149.555319       | 297.119345     | 149.063311       | A    | 2062.074986 | 1031.541131     | 2045.048437    | 1023.027856      | 2044.064421    | 1022.535848      | 16 |
| 4  | 430.156853  | 215.582065      | 413.130304     | 207.068790       | 412.146288     | 206.576782       | D    | 1991.037872 | 996.022574      | 1974.011323    | 987.509300       | 1973.027307    | 987.017292       | 15 |
| 5  | 517.188881  | 259.098079      | 500.162332     | 250.584804       | 499.178316     | 250.092796       | S    | 1876.010929 | 938.509103      | 1858.984380    | 929.995828       | 1858.000364    | 929.503820       | 14 |
| 6  | 630.272945  | 315.640111      | 613.246396     | 307.126836       | 612.262380     | 306.634828       | L    | 1788.978901 | 894.993089      | 1771.952352    | 886.479814       | 1770.968336    | 885.987806       | 13 |
| 7  | 1069.498271 | 535.252774      | 1052.471722    | 526.739499       | 1051.487706    | 526.247491       | Q    | 1675.894837 | 838.451057      | 1658.868288    | 829.937782       | 1657.884272    | 829.445774       | 12 |
| 8  | 1140.535385 | 570.771331      | 1123.508836    | 562.258056       | 1122.524820    | 561.766048       | A    | 1236.669511 | 618.838394      | 1219.642962    | 610.325119       | 1218.658946    | 609.833111       | 11 |
| 9  | 1227.567413 | 614.287345      | 1210.540864    | 605.774070       | 1209.556848    | 605.282062       | S    | 1165.632397 | 583.319837      | 1148.605848    | 574.806562       | 1147.621832    | 574.314554       | 10 |
| 10 | 1340.651477 | 670.829377      | 1323.624928    | 662.316102       | 1322.640912    | 661.824094       | L    | 1078.600369 | 539.803823      | 1061.573820    | 531.290548       | 1060.589804    | 530.798540       | 9  |
| 11 | 1496.752588 | 748.879932      | 1479.726039    | 740.366658       | 1478.742023    | 739.874650       | R    | 965.516305  | 483.261791      | 948.489756     | 474.748516       | 947.505740     | 474.256508       | 8  |
| 12 | 1593.805352 | 797.406314      | 1576.778803    | 788.893040       | 1575.794787    | 788.401032       | P    | 809.415194  | 405.211235      | 792.388645     | 396.697961       | 791.404629     | 396.205953       | 7  |
| 13 | 1730.864264 | 865.935770      | 1713.837715    | 857.422496       | 1712.853699    | 856.930488       | H    | 712.362430  | 356.684853      | 695.335881     | 348.171579       | 694.351865     | 347.679571       | 6  |
| 14 | 1801.901378 | 901.454327      | 1784.874829    | 892.941053       | 1783.890813    | 892.449045       | A    | 575.303518  | 288.155397      | 558.276969     | 279.642123       | 557.292953     | 279.150115       | 5  |
| 15 | 1916.928321 | 958.967799      | 1899.901772    | 950.454524       | 1898.917756    | 949.962516       | D    | 504.266404  | 252.636840      | 487.239855     | 244.123566       | 486.255839     | 243.631558       | 4  |
| 16 | 2045.970914 | 1023.489095     | 2028.944365    | 1014.975821      | 2027.960349    | 1014.483813      | E    | 389.239461  | 195.123369      | 372.212912     | 186.610094       | 371.228896     | 186.118086       | 3  |
| 17 | 2159.054978 | 1080.031127     | 2142.028429    | 1071.517852      | 2141.044413    | 1071.025844      | L    | 260.196868  | 130.602072      | 243.170319     | 122.088798       |                |                  | 2  |
| 18 |             |                 |                |                  |                |                  | K    | 147.112804  | 74.060040       | 130.086255     | 65.546765        |                |                  | 1  |

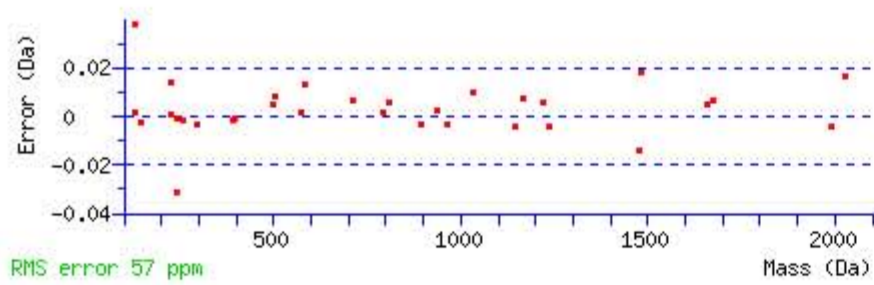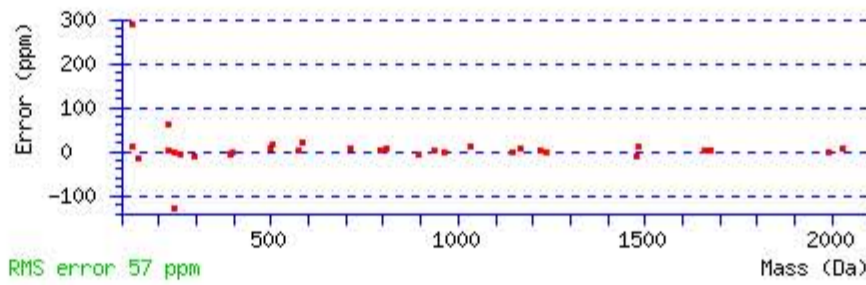

NCBI BLAST search of [ENADSLQASLRPHADELK](#)  
 (Parameters: blastp, nr protein database, expect=20000, no filter, PAM30)  
 Other BLAST [web gateways](#)

All matches to this query

| Score | Mr(calc):   | Delta    | Sequence                           |
|-------|-------------|----------|------------------------------------|
| 40.4  | 2304.153183 | 0.012189 | <a href="#">ENADSLQASLRPHADELK</a> |

Mascot: <http://www.matrixscience.com/>

# MASCOT Search Results

## Peptide View

MS/MS Fragmentation of **QSELSAK**

Found in **APOC1\_HUMAN**, Apolipoprotein C-I OS=Homo sapiens GN=APOC1 PE=1 SV=1

Match to Query 13355: 1072.552048 from(537.283300,2+) rtinseconds(1456) index(57702)

Title: Locus:1.1.1.1418.7 File:"2013-07-02 CLN FXIII 180 min 3rd FT.wiff"

Data file C:\Program Files (x86)\Matrix Science\Mascot Daemon\mgf9 FXIII 180 min 3rd\mascot\_daemon\_merge.mgf

Click mouse within plot area to zoom in by factor of two about that point

Or, Plot from  to  Da

Label all possible matches  Label matches used for scoring

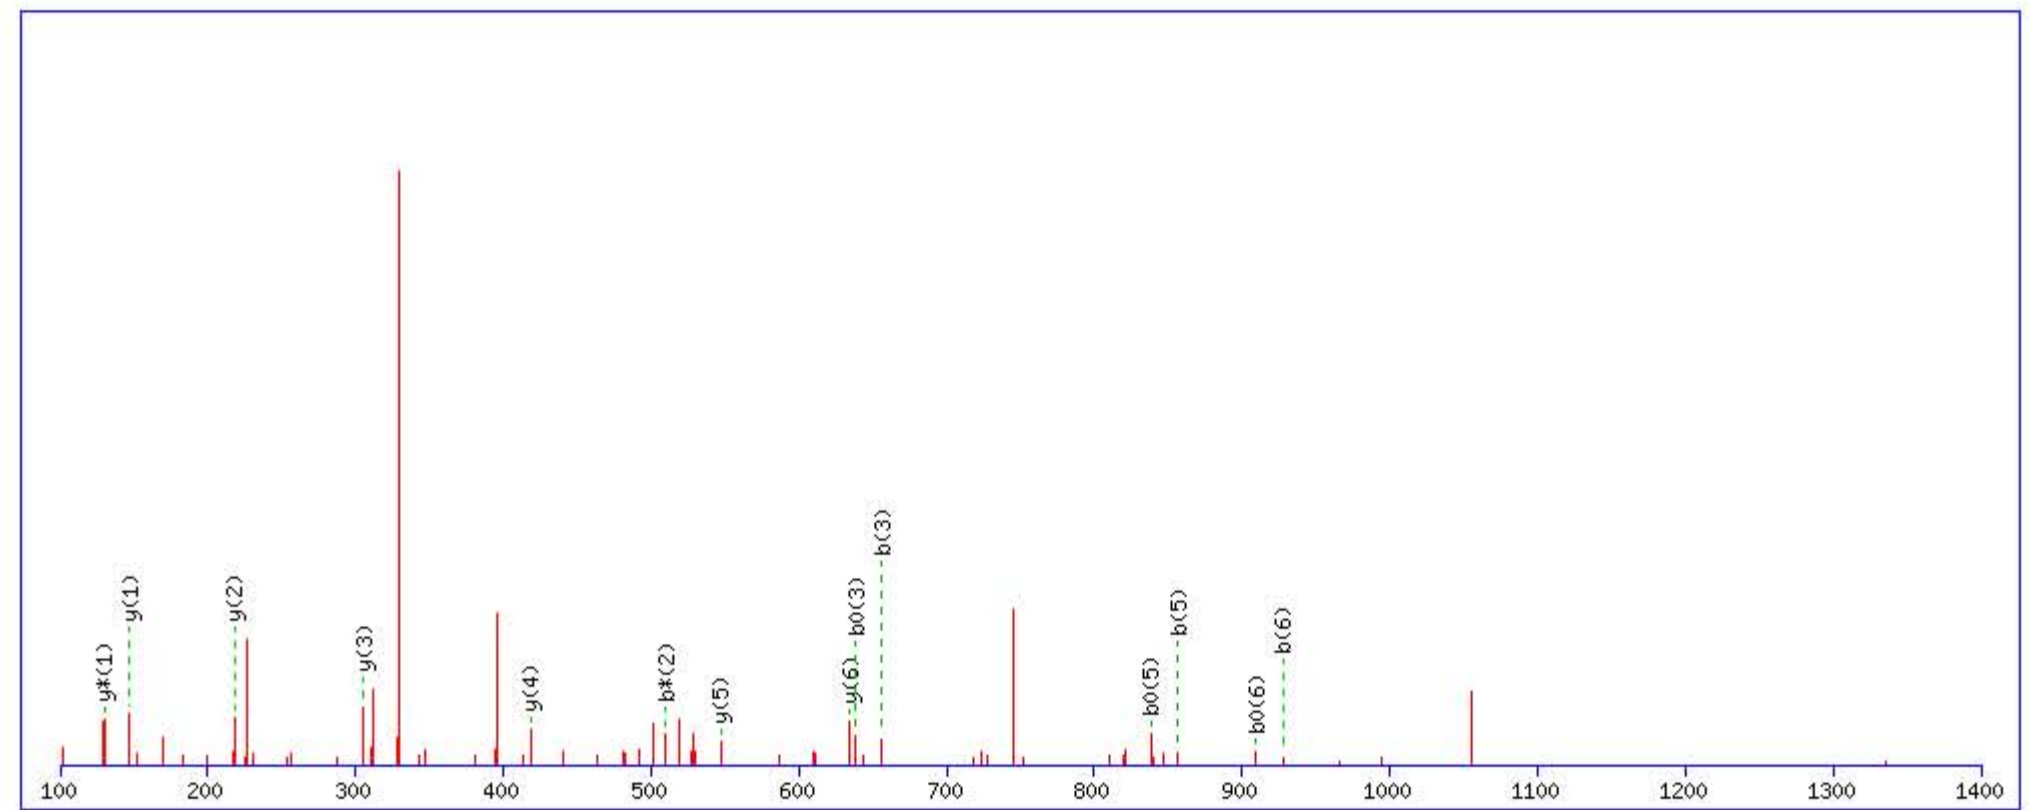

Monoisotopic mass of neutral peptide Mr(calc): 1072.558655

Fixed modifications: Carbamidomethyl (C) (apply to specified residues or termini only)

Variable modifications:

Q1 : Biotin:Thermo-21345 (Q)

Ions Score: 27 Expect: 0.05

Matches : 14/66 fragment ions using 37 most intense peaks [\(help\)](#)

| # | b          | b <sup>++</sup> | b*         | b <sup>+++</sup> | b <sup>0</sup> | b <sup>0++</sup> | Seq. | y          | y <sup>++</sup> | y*         | y <sup>+++</sup> | y <sup>0</sup> | y <sup>0++</sup> | # |
|---|------------|-----------------|------------|------------------|----------------|------------------|------|------------|-----------------|------------|------------------|----------------|------------------|---|
| 1 | 440.232602 | 220.619939      | 423.206053 | 212.106664       |                |                  | Q    |            |                 |            |                  |                |                  | 7 |
| 2 | 527.264630 | 264.135953      | 510.238081 | 255.622679       | 509.254065     | 255.130671       | S    | 634.340631 | 317.673954      | 617.314082 | 309.160679       | 616.330066     | 308.668671       | 6 |
| 3 | 656.307223 | 328.657250      | 639.280674 | 320.143975       | 638.296658     | 319.651967       | E    | 547.308603 | 274.157940      | 530.282054 | 265.644665       | 529.298038     | 265.152657       | 5 |
| 4 | 769.391287 | 385.199282      | 752.364738 | 376.686007       | 751.380722     | 376.193999       | L    | 418.266010 | 209.636643      | 401.239461 | 201.123368       | 400.255445     | 200.631360       | 4 |
| 5 | 856.423315 | 428.715296      | 839.396766 | 420.202021       | 838.412750     | 419.710013       | S    | 305.181946 | 153.094611      | 288.155397 | 144.581336       | 287.171381     | 144.089328       | 3 |
| 6 | 927.460429 | 464.233853      | 910.433880 | 455.720578       | 909.449864     | 455.228570       | A    | 218.149918 | 109.578597      | 201.123369 | 101.065322       |                |                  | 2 |
| 7 |            |                 |            |                  |                |                  | K    | 147.112804 | 74.060040       | 130.086255 | 65.546765        |                |                  | 1 |

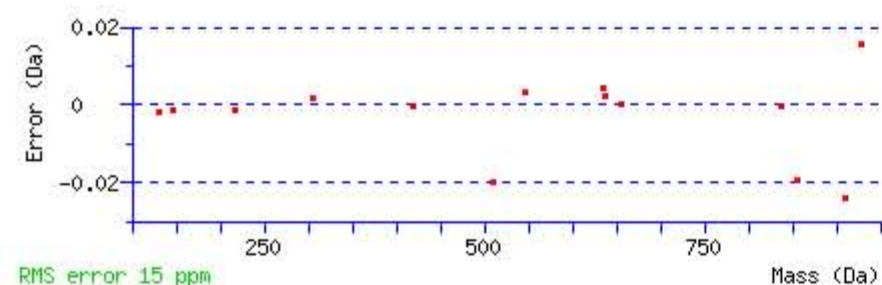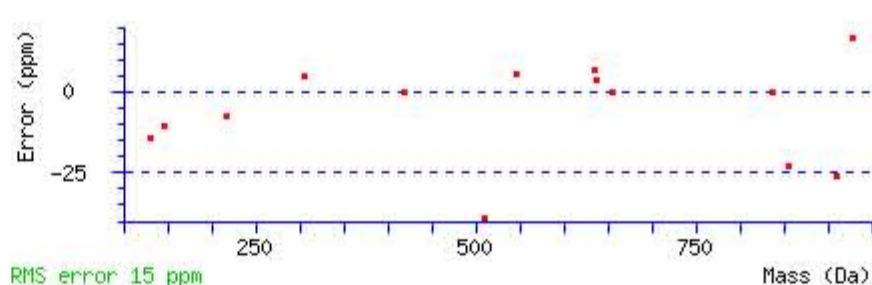

NCBI BLAST search of **QSELSAK**

(Parameters: blastp, nr protein database, expect=20000, no filter, PAM30)

Other BLAST [web gateways](#)

All matches to this query

| Score | Mr(calc):   | Delta     | Sequence                    |
|-------|-------------|-----------|-----------------------------|
| 26.8  | 1072.558655 | -0.006607 | <a href="#">QSELSAK</a>     |
| 16.3  | 1072.562500 | -0.010452 | <a href="#">HSSTSSRIAK</a>  |
| 12.9  | 1072.544739 | 0.007309  | <a href="#">RPGQAAGMSAK</a> |
| 12.0  | 1072.551254 | 0.000794  | <a href="#">KEAPRDETK</a>   |
| 9.9   | 1072.551239 | 0.000809  | <a href="#">ERQEALEAK</a>   |
| 9.1   | 1072.551285 | 0.000763  | <a href="#">TVQQVNQEK</a>   |
| 8.2   | 1072.558655 | -0.006607 | <a href="#">QSLSAEK</a>     |
| 7.3   | 1072.558670 | -0.006622 | <a href="#">QSEGLTK</a>     |
| 6.1   | 1072.551239 | 0.000809  | <a href="#">EAERELQAK</a>   |
| 5.8   | 1072.540039 | 0.012009  | <a href="#">VSQVESPEAK</a>  |

Mascot: <http://www.matrixscience.com/>

# MASCOT Search Results

## Peptide View

MS/MS Fragmentation of **TAAQNLYEK**

Found in **APOC2\_HUMAN**, Apolipoprotein C-II OS=Homo sapiens GN=APOC2 PE=1 SV=1

Match to Query 21287: 1347.675288 from(674.844920,2+) rtinseconds(1667) index(43965)

Title: Locus:1.1.1.3293.12 File:"2013-07-02 CLN FXIII 180 min 3rd F 4.wiff"

Data file C:\Program Files (x86)\Matrix Science\Mascot Daemon\mgf\9 FXIII 180 min 3rd\mascot\_daemon\_merge.mgf

Click mouse within plot area to zoom in by factor of two about that point

Or, Plot from  to  Da

Label all possible matches  Label matches used for scoring

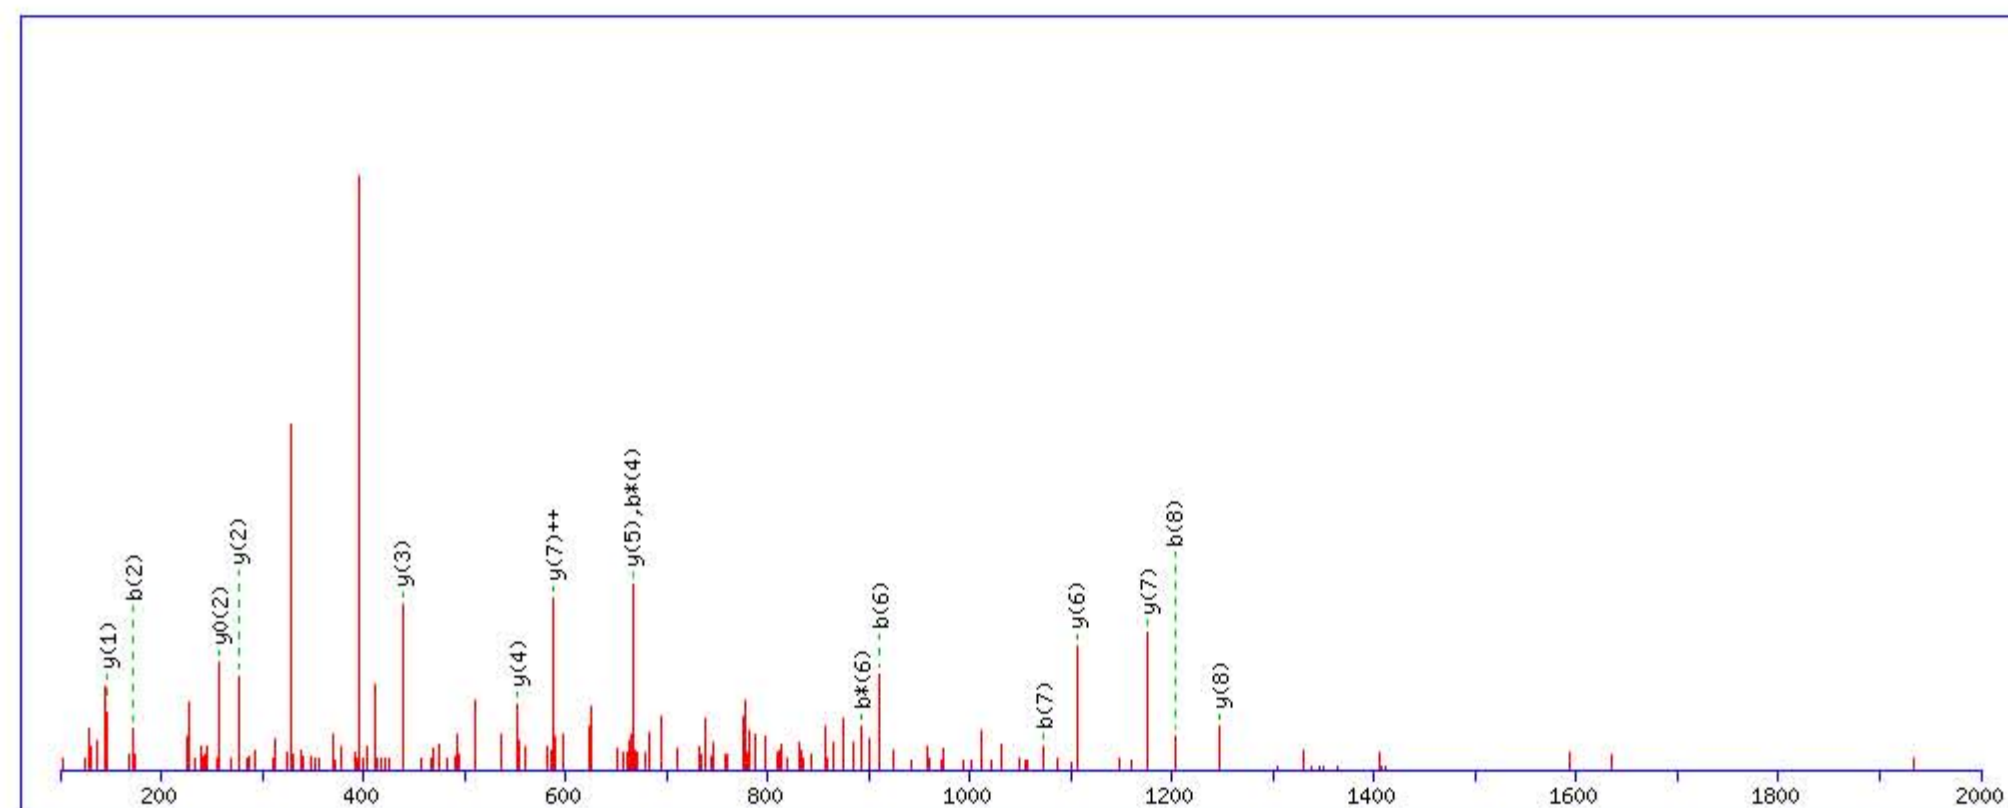

Monoisotopic mass of neutral peptide Mr(calc): 1347.685638

Fixed modifications: Carbamidomethyl (C) (apply to specified residues or termini only)

Variable modifications:

Q4 : Biotin:Thermo-21345 (Q)

Ions Score: 37 Expect: 0.0011

Matches : 16/88 fragment ions using 38 most intense peaks [\(help\)](#)

| # | b                  | b <sup>++</sup> | b <sup>*</sup>    | b <sup>*++</sup> | b <sup>0</sup> | b <sup>0++</sup> | Seq. | y                  | y <sup>++</sup>   | y <sup>*</sup> | y <sup>*++</sup> | y <sup>0</sup>    | y <sup>0++</sup> | # |
|---|--------------------|-----------------|-------------------|------------------|----------------|------------------|------|--------------------|-------------------|----------------|------------------|-------------------|------------------|---|
| 1 | 102.054955         | 51.531116       |                   |                  | 84.044390      | 42.525833        | T    |                    |                   |                |                  |                   |                  | 9 |
| 2 | <b>173.092069</b>  | 87.049672       |                   |                  | 155.081504     | 78.044390        | A    | <b>1247.645271</b> | 624.326273        | 1230.618722    | 615.812999       | 1229.634706       | 615.320991       | 8 |
| 3 | 244.129183         | 122.568229      |                   |                  | 226.118618     | 113.562947       | A    | <b>1176.608157</b> | <b>588.807716</b> | 1159.581608    | 580.294442       | 1158.597592       | 579.802434       | 7 |
| 4 | 683.354509         | 342.180893      | <b>666.327960</b> | 333.667618       | 665.343944     | 333.175610       | Q    | <b>1105.571043</b> | 553.289159        | 1088.544494    | 544.775885       | 1087.560478       | 544.283877       | 6 |
| 5 | 797.397436         | 399.202356      | 780.370887        | 390.689081       | 779.386871     | 390.197073       | N    | <b>666.345717</b>  | 333.676496        | 649.319168     | 325.163222       | 648.335152        | 324.671214       | 5 |
| 6 | <b>910.481500</b>  | 455.744388      | <b>893.454951</b> | 447.231113       | 892.470935     | 446.739105       | L    | <b>552.302790</b>  | 276.655033        | 535.276241     | 268.141758       | 534.292225        | 267.649750       | 4 |
| 7 | <b>1073.544829</b> | 537.276052      | 1056.518280       | 528.762778       | 1055.534264    | 528.270770       | Y    | <b>439.218726</b>  | 220.113001        | 422.192177     | 211.599726       | 421.208161        | 211.107718       | 3 |
| 8 | <b>1202.587422</b> | 601.797349      | 1185.560873       | 593.284074       | 1184.576857    | 592.792066       | E    | <b>276.155397</b>  | 138.581336        | 259.128848     | 130.068062       | <b>258.144832</b> | 129.576054       | 2 |
| 9 |                    |                 |                   |                  |                |                  | K    | <b>147.112804</b>  | 74.060040         | 130.086255     | 65.546765        |                   |                  | 1 |

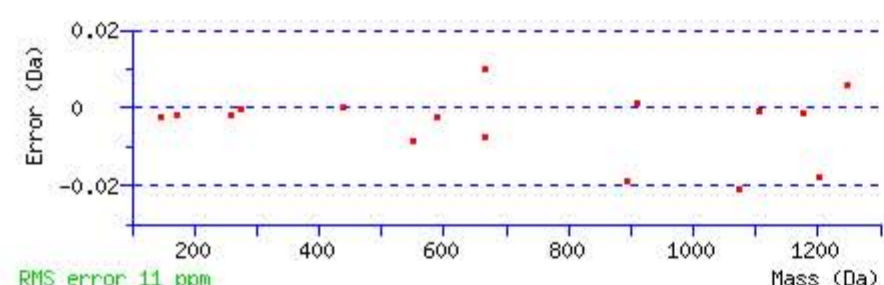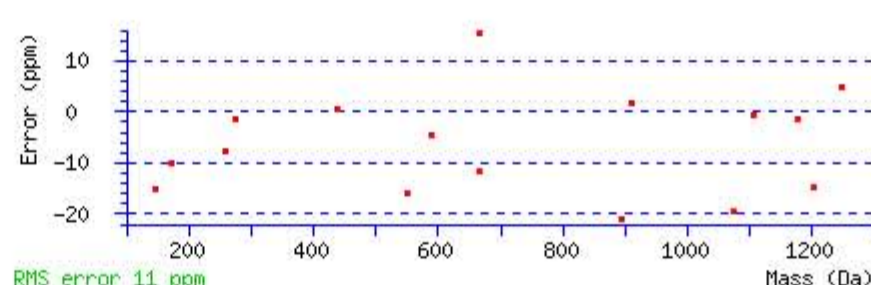

NCBI BLAST search of **TAAQNLYEK**

(Parameters: blastp, nr protein database, expect=20000, no filter, PAM30)

Other BLAST [web gateways](#)

## All matches to this query

| Score | Mr(calc):   | Delta     | Sequence                       |
|-------|-------------|-----------|--------------------------------|
| 36.5  | 1347.685638 | -0.010350 | <a href="#">TAAQNLYEK</a>      |
| 4.6   | 1347.682297 | -0.007009 | <a href="#">TAYFSLDTRFK</a>    |
| 4.3   | 1347.681610 | -0.006322 | <a href="#">RSQISMEQLEK</a>    |
| 2.4   | 1347.681641 | -0.006353 | <a href="#">QDMIVRTTQEK</a>    |
| 2.4   | 1347.656464 | 0.018824  | <a href="#">TALLNMDRENK</a>    |
| 2.0   | 1347.660522 | 0.014766  | <a href="#">GDILPNPCHTPK</a>   |
| 1.5   | 1347.688156 | -0.012868 | <a href="#">LLSQDSVAASTEK</a>  |
| 1.3   | 1347.667053 | 0.008235  | <a href="#">EPEPPGVVGGPGEK</a> |
| 1.2   | 1347.664536 | 0.010752  | <a href="#">QFWSNVEK</a>       |
| 0.6   | 1347.682480 | -0.007192 | <a href="#">QSRMKMEK</a>       |

# Mascot Search Results

## Peptide View

MS/MS Fragmentation of **STAAMSTYTGIFTDQVLSVLK**

Found in **APOC2\_HUMAN**, Apolipoprotein C-II OS=Homo sapiens GN=APOC2 PE=1 SV=1

Match to Query 48992: 2543.300082 from(848.773970,3+) rtinseconds(3253) index(39529)

Title: Locus:1.1.1.3791.6 File:"2013-07-02 CLN FXIII 180 min 3rd F 3.wiff"

Data file C:\Program Files (x86)\Matrix Science\Mascot Daemon\mgf9 FXIII 180 min 3rd\mascot\_daemon\_merge.mgf

Click mouse within plot area to zoom in by factor of two about that point

Or, Plot from 0 to 2600 Da Full range

Label all possible matches  Label matches used for scoring

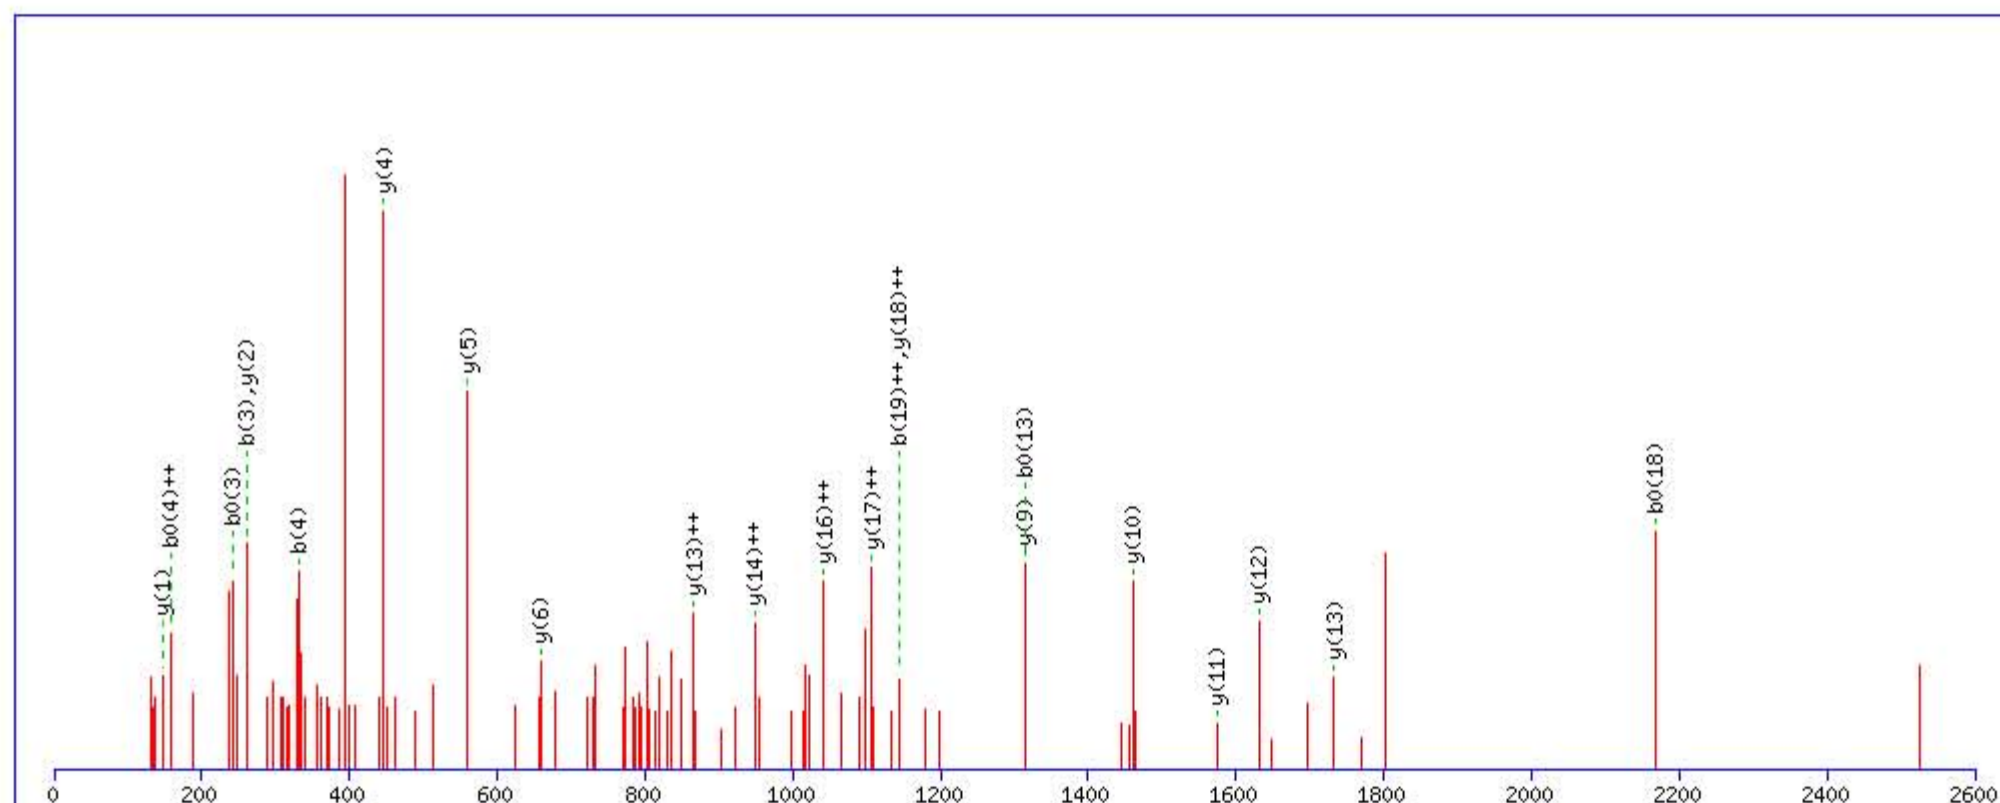

Monoisotopic mass of neutral peptide Mr(calc): 2543.301544

Fixed modifications: Carbamidomethyl (C) (apply to specified residues or termini only)

Variable modifications:

Q15 : Biotin:Thermo-21345 (Q)

Ions Score: 60 Expect: 2.8e-005

Matches : 22/206 fragment ions using 33 most intense peaks ([help](#))

| #  | b                 | b <sup>++</sup>    | b <sup>*</sup> | b <sup>*++</sup> | b <sup>0</sup>     | b <sup>0++</sup>  | Seq. | y                  | y <sup>++</sup>    | y <sup>*</sup> | y <sup>*++</sup> | y <sup>0</sup> | y <sup>0++</sup> | #  |
|----|-------------------|--------------------|----------------|------------------|--------------------|-------------------|------|--------------------|--------------------|----------------|------------------|----------------|------------------|----|
| 1  | 88.039304         | 44.523290          |                |                  | 70.028739          | 35.518008         | S    |                    |                    |                |                  |                |                  | 21 |
| 2  | 189.086983        | 95.047129          |                |                  | 171.076418         | 86.041847         | T    | 2457.276785        | 1229.142030        | 2440.250236    | 1220.628756      | 2439.266220    | 1220.136748      | 20 |
| 3  | <b>260.124097</b> | 130.565686         |                |                  | <b>242.113532</b>  | 121.560404        | A    | 2356.229106        | 1178.618191        | 2339.202557    | 1170.104916      | 2338.218541    | 1169.612908      | 19 |
| 4  | <b>331.161211</b> | 166.084243         |                |                  | 313.150646         | <b>157.078961</b> | A    | 2285.191992        | <b>1143.099634</b> | 2268.165443    | 1134.586359      | 2267.181427    | 1134.094351      | 18 |
| 5  | 462.201696        | 231.604486         |                |                  | 444.191131         | 222.599203        | M    | 2214.154878        | <b>1107.581077</b> | 2197.128329    | 1099.067802      | 2196.144313    | 1098.575794      | 17 |
| 6  | 549.233724        | 275.120500         |                |                  | 531.223159         | 266.115217        | S    | 2083.114393        | <b>1042.060834</b> | 2066.087844    | 1033.547560      | 2065.103828    | 1033.055552      | 16 |
| 7  | 650.281403        | 325.644340         |                |                  | 632.270838         | 316.639057        | T    | 1996.082365        | 998.544821         | 1979.055816    | 990.031546       | 1978.071800    | 989.539538       | 15 |
| 8  | 813.344732        | 407.176004         |                |                  | 795.334167         | 398.170722        | Y    | 1895.034686        | <b>948.020981</b>  | 1878.008137    | 939.507707       | 1877.024121    | 939.015699       | 14 |
| 9  | 914.392411        | 457.699844         |                |                  | 896.381846         | 448.694561        | T    | <b>1731.971357</b> | <b>866.489317</b>  | 1714.944808    | 857.976042       | 1713.960792    | 857.484034       | 13 |
| 10 | 971.413875        | 486.210576         |                |                  | 953.403310         | 477.205293        | G    | <b>1630.923678</b> | 815.965477         | 1613.897129    | 807.452203       | 1612.913113    | 806.960195       | 12 |
| 11 | 1084.497939       | 542.752608         |                |                  | 1066.487374        | 533.747325        | I    | <b>1573.902214</b> | 787.454745         | 1556.875665    | 778.941471       | 1555.891649    | 778.449463       | 11 |
| 12 | 1231.566353       | 616.286815         |                |                  | 1213.555788        | 607.281532        | F    | <b>1460.818150</b> | 730.912713         | 1443.791601    | 722.399439       | 1442.807585    | 721.907431       | 10 |
| 13 | 1332.614032       | 666.810654         |                |                  | <b>1314.603467</b> | 657.805372        | T    | <b>1313.749736</b> | 657.378506         | 1296.723187    | 648.865232       | 1295.739171    | 648.373224       | 9  |
| 14 | 1447.640975       | 724.324126         |                |                  | 1429.630410        | 715.318843        | D    | 1212.702057        | 606.854667         | 1195.675508    | 598.341392       | 1194.691492    | 597.849384       | 8  |
| 15 | 1886.866301       | 943.936789         | 1869.839752    | 935.423514       | 1868.855736        | 934.931506        | Q    | 1097.675114        | 549.341195         | 1080.648565    | 540.827921       | 1079.664549    | 540.335913       | 7  |
| 16 | 1985.934715       | 993.470996         | 1968.908166    | 984.957721       | 1967.924150        | 984.465713        | V    | <b>658.449788</b>  | 329.728532         | 641.423239     | 321.215258       | 640.439223     | 320.723250       | 6  |
| 17 | 2099.018779       | 1050.013027        | 2081.992230    | 1041.499753      | 2081.008214        | 1041.007745       | L    | <b>559.381374</b>  | 280.194325         | 542.354825     | 271.681051       | 541.370809     | 271.189043       | 5  |
| 18 | 2186.050807       | 1093.529041        | 2169.024258    | 1085.015767      | <b>2168.040242</b> | 1084.523759       | S    | <b>446.297310</b>  | 223.652293         | 429.270761     | 215.139019       | 428.286745     | 214.647011       | 4  |
| 19 | 2285.119221       | <b>1143.063248</b> | 2268.092672    | 1134.549974      | 2267.108656        | 1134.057966       | V    | 359.265282         | 180.136279         | 342.238733     | 171.623004       |                |                  | 3  |
| 20 | 2398.203285       | 1199.605280        | 2381.176736    | 1191.092006      | 2380.192720        | 1190.599998       | L    | <b>260.196868</b>  | 130.602072         | 243.170319     | 122.088798       |                |                  | 2  |
| 21 |                   |                    |                |                  |                    |                   | K    | <b>147.112804</b>  | 74.060040          | 130.086255     | 65.546765        |                |                  | 1  |

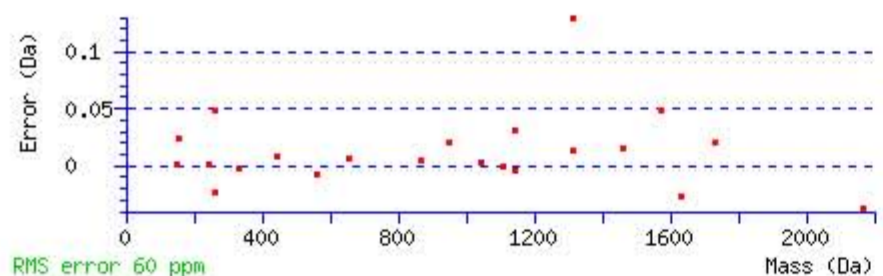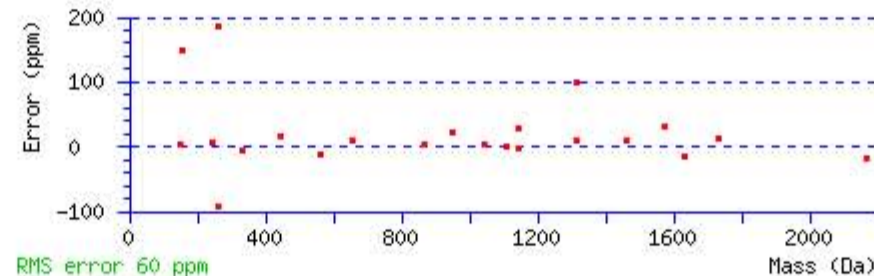

NCBI BLAST search of [STAAMSTYTGIFTDQVLSVLK](#)  
(Parameters: blastp, nr protein database, expect=20000, no filter, PAM30)  
Other BLAST [web gateways](#)

## All matches to this query

| Score | Mr(calc):   | Delta     | Sequence                              |
|-------|-------------|-----------|---------------------------------------|
| 60.4  | 2543.301544 | -0.001462 | <a href="#">STAAMSTYTGIFTDQVLSVLK</a> |

# Mascot Search Results

## Peptide View

MS/MS Fragmentation of **DALSSVQESQVAQQAR**

Found in **APOC3\_HUMAN**, Apolipoprotein C-III OS=Homo sapiens GN=APOC3 PE=1 SV=1

Match to Query 40302: 2027.001882 from(676.674570,3+) rtinseconds(1906) index(18367)

Title: Locus:1.1.1.3229.19 File:"2013-07-02 CLN FXIII 180 min 3rd F 2.wiff"

Data file C:\Program Files (x86)\Matrix Science\Mascot Daemon\mgf\9 FXIII 180 min 3rd\mascot\_daemon\_merge.mgf

Click mouse within plot area to zoom in by factor of two about that point

Or, Plot from 100 to 1800 Da

Label all possible matches  Label matches used for scoring

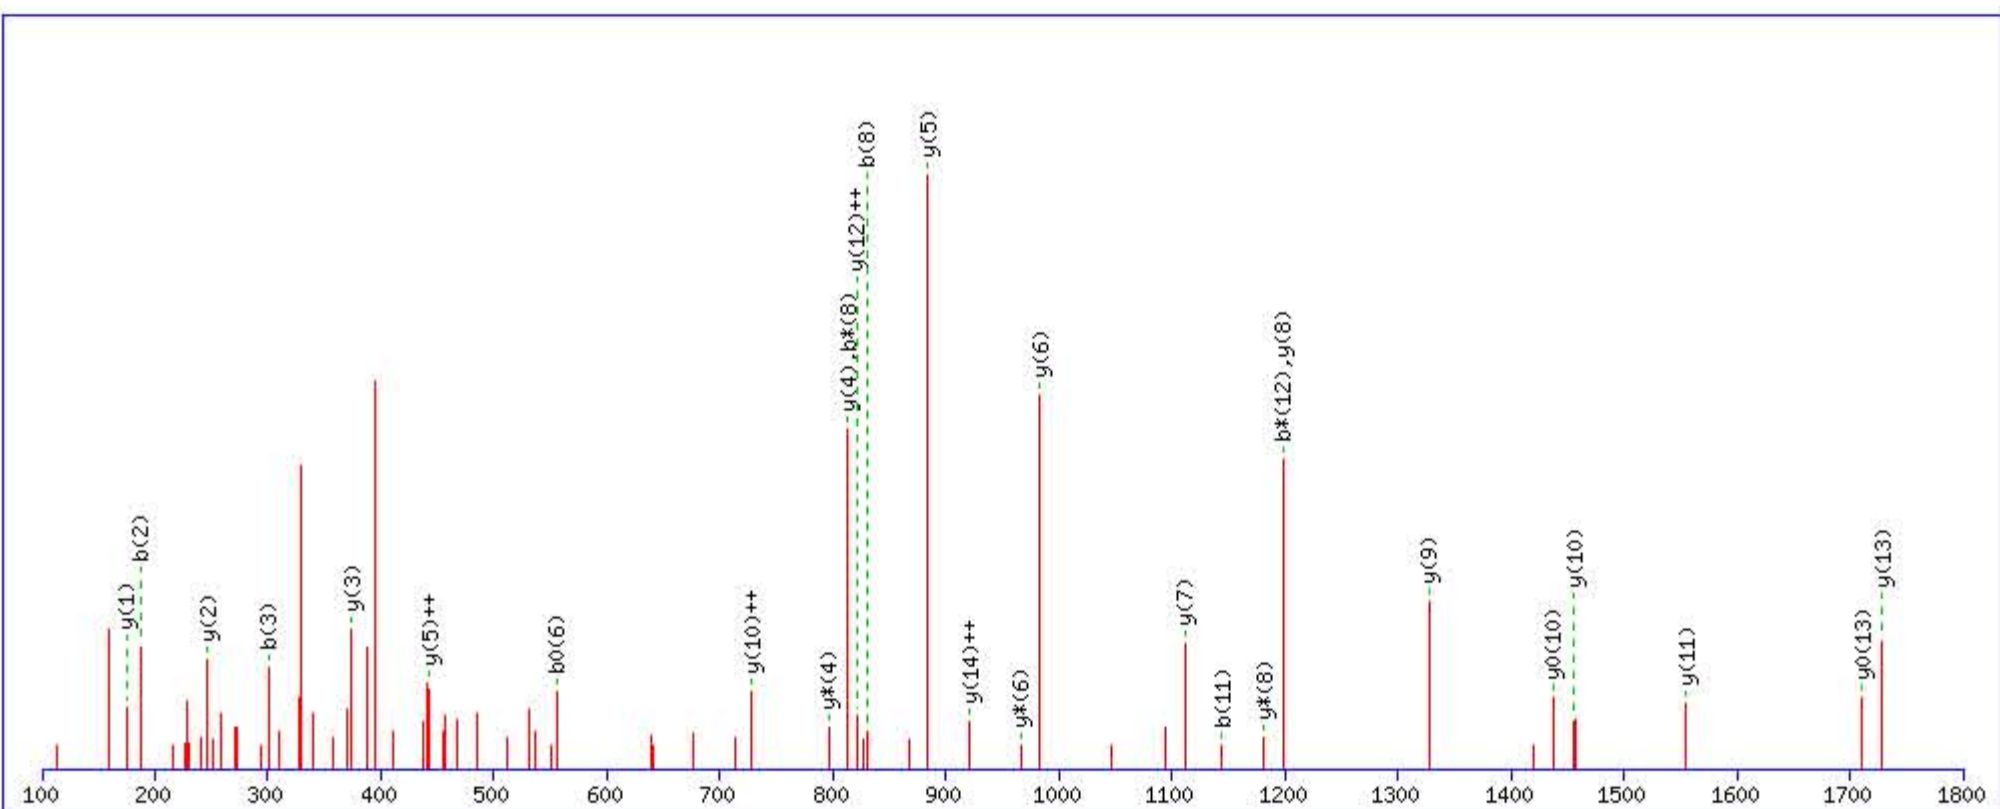

Monoisotopic mass of neutral peptide Mr(calc): 2027.010574

Fixed modifications: Carbamidomethyl (C) (apply to specified residues or termini only)

Variable modifications:

Q13 : Biotin:Thermo-21345 (Q)

Ions Score: 85 Expect: 1.4e-008

Matches : 28/154 fragment ions using 41 most intense peaks ([help](#))

| #  | b                  | b <sup>++</sup> | b <sup>*</sup>     | b <sup>*++</sup> | b <sup>0</sup>    | b <sup>0++</sup> | Seq. | y                  | y <sup>++</sup>   | y <sup>*</sup>     | y <sup>*++</sup> | y <sup>0</sup>     | y <sup>0++</sup> | #  |
|----|--------------------|-----------------|--------------------|------------------|-------------------|------------------|------|--------------------|-------------------|--------------------|------------------|--------------------|------------------|----|
| 1  | 116.034219         | 58.520748       |                    |                  | 98.023654         | 49.515465        | D    |                    |                   |                    |                  |                    |                  | 16 |
| 2  | <b>187.071333</b>  | 94.039304       |                    |                  | 169.060768        | 85.034022        | A    | 1912.990923        | 956.999100        | 1895.964374        | 948.485825       | 1894.980358        | 947.993817       | 15 |
| 3  | <b>300.155397</b>  | 150.581336      |                    |                  | 282.144832        | 141.576054       | L    | 1841.953809        | <b>921.480543</b> | 1824.927260        | 912.967268       | 1823.943244        | 912.475260       | 14 |
| 4  | 387.187425         | 194.097351      |                    |                  | 369.176860        | 185.092068       | S    | <b>1728.869745</b> | 864.938511        | 1711.843196        | 856.425236       | <b>1710.859180</b> | 855.933228       | 13 |
| 5  | 474.219453         | 237.613364      |                    |                  | 456.208888        | 228.608082       | S    | 1641.837717        | <b>821.422497</b> | 1624.811168        | 812.909222       | 1623.827152        | 812.417214       | 12 |
| 6  | 573.287867         | 287.147572      |                    |                  | <b>555.277302</b> | 278.142289       | V    | <b>1554.805689</b> | 777.906483        | 1537.779140        | 769.393208       | 1536.795124        | 768.901200       | 11 |
| 7  | 701.346445         | 351.176861      | 684.319896         | 342.663586       | 683.335880        | 342.171578       | Q    | <b>1455.737275</b> | <b>728.372276</b> | 1438.710726        | 719.859001       | <b>1437.726710</b> | 719.366993       | 10 |
| 8  | <b>830.389038</b>  | 415.698157      | <b>813.362489</b>  | 407.184883       | 812.378473        | 406.692875       | E    | <b>1327.678697</b> | 664.342987        | 1310.652148        | 655.829712       | 1309.668132        | 655.337704       | 9  |
| 9  | 917.421066         | 459.214171      | 900.394517         | 450.700897       | 899.410501        | 450.208889       | S    | <b>1198.636104</b> | 599.821690        | <b>1181.609555</b> | 591.308416       | 1180.625539        | 590.816408       | 8  |
| 10 | 1045.479644        | 523.243460      | 1028.453095        | 514.730186       | 1027.469079       | 514.238178       | Q    | <b>1111.604076</b> | 556.305676        | 1094.577527        | 547.792402       |                    |                  | 7  |
| 11 | <b>1144.548058</b> | 572.777667      | 1127.521509        | 564.264393       | 1126.537493       | 563.772385       | V    | <b>983.545498</b>  | 492.276387        | <b>966.518949</b>  | 483.763113       |                    |                  | 6  |
| 12 | 1215.585172        | 608.296224      | <b>1198.558623</b> | 599.782950       | 1197.574607       | 599.290942       | A    | <b>884.477084</b>  | <b>442.742180</b> | 867.450535         | 434.228906       |                    |                  | 5  |
| 13 | 1654.810498        | 827.908887      | 1637.783949        | 819.395613       | 1636.799933       | 818.903605       | Q    | <b>813.439970</b>  | 407.223623        | <b>796.413421</b>  | 398.710349       |                    |                  | 4  |
| 14 | 1782.869076        | 891.938176      | 1765.842527        | 883.424902       | 1764.858511       | 882.932894       | Q    | <b>374.214644</b>  | 187.610960        | 357.188095         | 179.097686       |                    |                  | 3  |
| 15 | 1853.906190        | 927.456733      | 1836.879641        | 918.943459       | 1835.895625       | 918.451451       | A    | <b>246.156066</b>  | 123.581671        | 229.129517         | 115.068396       |                    |                  | 2  |
| 16 |                    |                 |                    |                  |                   |                  | R    | <b>175.118952</b>  | 88.063114         | 158.092403         | 79.549839        |                    |                  | 1  |

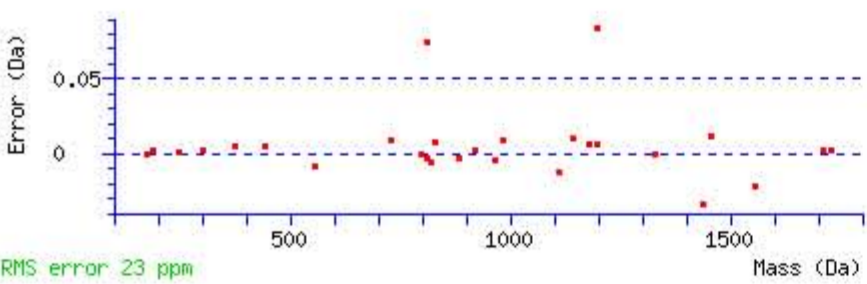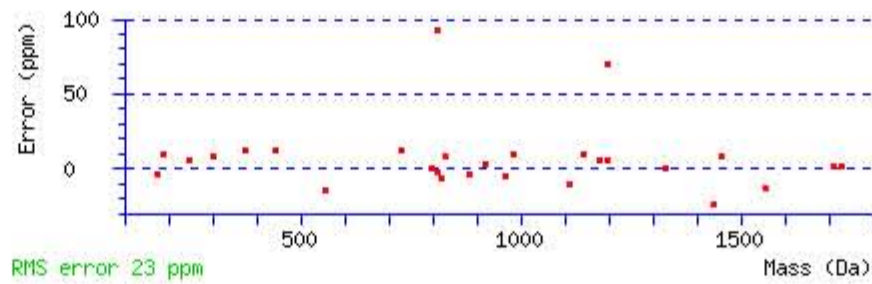

NCBI BLAST search of **DALSSVQESQVAQQAR**

(Parameters: blastp, nr protein database, expect=20000, no filter, PAM30)

Other BLAST [web gateways](#)

## All matches to this query

| Score | Mr(calc):   | Delta     | Sequence                             |
|-------|-------------|-----------|--------------------------------------|
| 84.9  | 2027.010574 | -0.008692 | <a href="#">DALSSVQESQVAQQAR</a>     |
| 71.9  | 2027.010574 | -0.008692 | <a href="#">DALSSVQESQVAQQAR</a>     |
| 44.4  | 2027.010574 | -0.008692 | <a href="#">DALSSVQESQVAQQAR</a>     |
| 13.6  | 2027.010574 | -0.008692 | <a href="#">DALSSVQESQVAQQAR</a>     |
| 1.1   | 2027.017960 | -0.016078 | <a href="#">MFELTLRGMSEALVDKR</a>    |
| 0.7   | 2026.978012 | 0.023870  | <a href="#">AEGAQNQGQKGEQAQNQGKK</a> |
| 0.1   | 2026.980667 | 0.021215  | <a href="#">LEGAIAEAEQQGEAALNDAK</a> |

Mascot: <http://www.matrixscience.com/>



# MASCOT SEARCH RESULTS

## Peptide View

MS/MS Fragmentation of **DALSSVQESQVAQQAR**

Found in **APOC3\_HUMAN**, Apolipoprotein C-III OS=Homo sapiens GN=APOC3 PE=1 SV=1

Match to Query 40303: 2027.003488 from(1014.509020,2+) rtinseconds(1961) index(18847)

Title: Locus:1.1.1.3248.24 File:"2013-07-02 CLN FXIII 180 min 3rd F 2.wiff"

Data file C:\Program Files (x86)\Matrix Science\Mascot Daemon\mgf\9 FXIII 180 min 3rd\mascot\_daemon\_merge.mgf

Click mouse within plot area to zoom in by factor of two about that point

Or, Plot from  to  Da

Label all possible matches  Label matches used for scoring

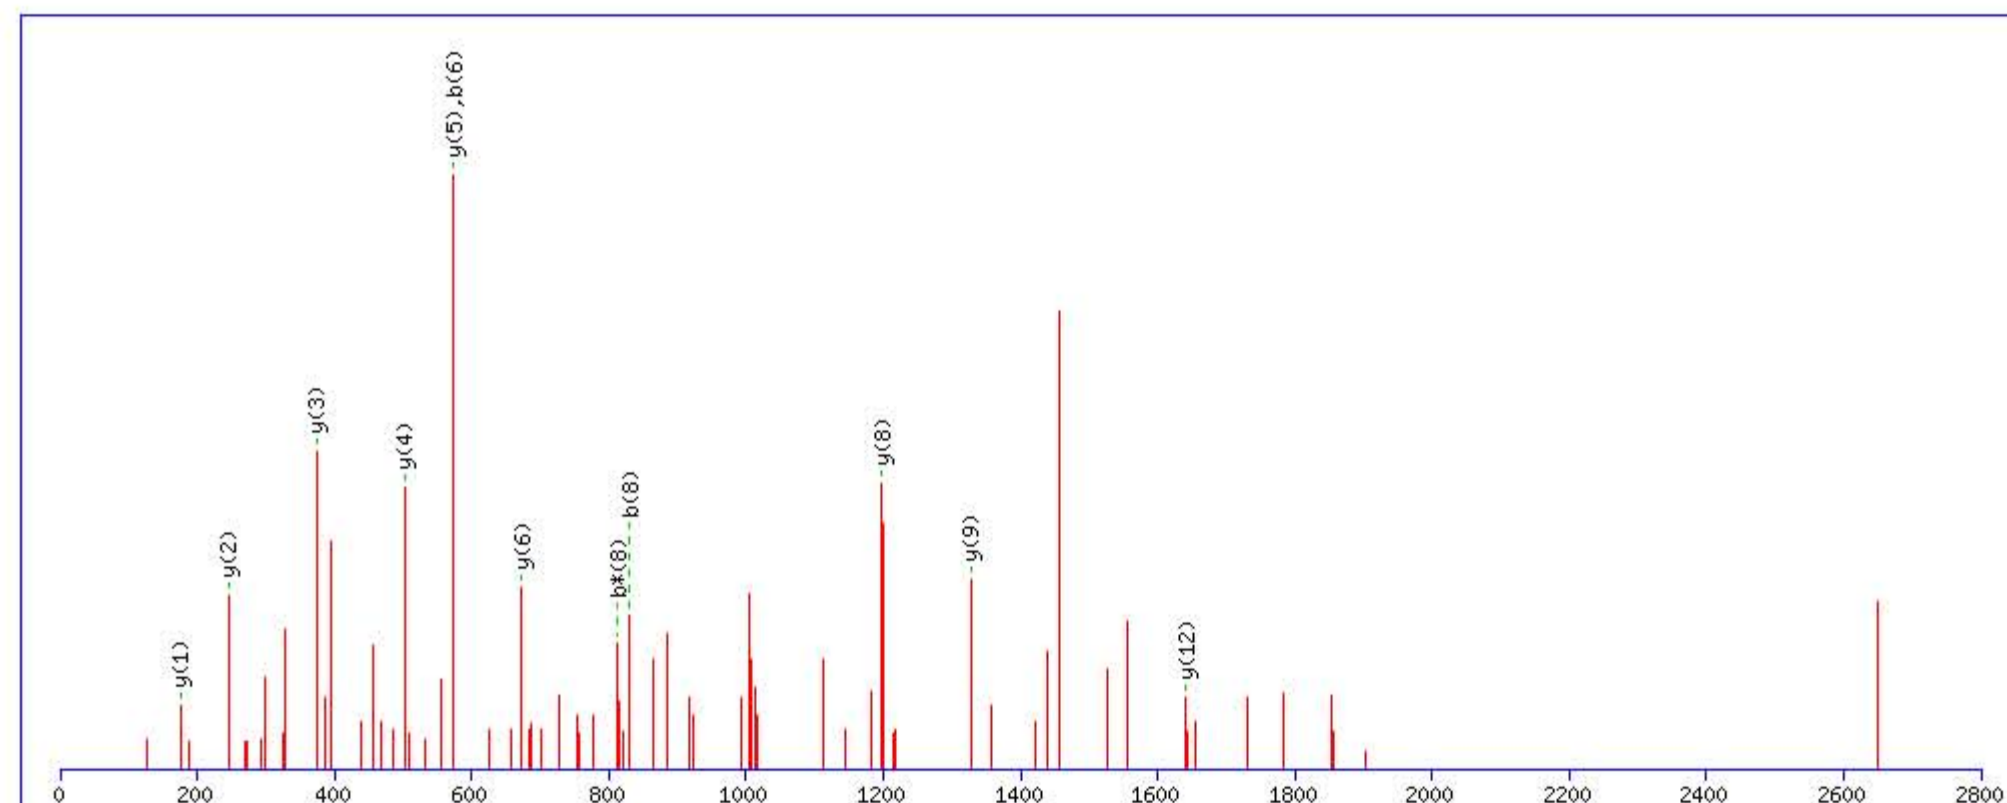

Monoisotopic mass of neutral peptide Mr(calc): 2027.010574

Fixed modifications: Carbamidomethyl (C) (apply to specified residues or termini only)

Variable modifications:

Q10 : Biotin:Thermo-21345 (Q)

Ions Score: 66 Expect: 1e-006

Matches : 12/154 fragment ions using 17 most intense peaks [\(help\)](#)

| #  | b           | b <sup>++</sup> | b <sup>*</sup> | b <sup>+++</sup> | b <sup>0</sup> | b <sup>0++</sup> | Seq. | y           | y <sup>++</sup> | y <sup>*</sup> | y <sup>+++</sup> | y <sup>0</sup> | y <sup>0++</sup> | #  |
|----|-------------|-----------------|----------------|------------------|----------------|------------------|------|-------------|-----------------|----------------|------------------|----------------|------------------|----|
| 1  | 116.034219  | 58.520748       |                |                  | 98.023654      | 49.515465        | D    |             |                 |                |                  |                |                  | 16 |
| 2  | 187.071333  | 94.039304       |                |                  | 169.060768     | 85.034022        | A    | 1912.990923 | 956.999100      | 1895.964374    | 948.485825       | 1894.980358    | 947.993817       | 15 |
| 3  | 300.155397  | 150.581336      |                |                  | 282.144832     | 141.576054       | L    | 1841.953809 | 921.480543      | 1824.927260    | 912.967268       | 1823.943244    | 912.475260       | 14 |
| 4  | 387.187425  | 194.097351      |                |                  | 369.176860     | 185.092068       | S    | 1728.869745 | 864.938511      | 1711.843196    | 856.425236       | 1710.859180    | 855.933228       | 13 |
| 5  | 474.219453  | 237.613364      |                |                  | 456.208888     | 228.608082       | S    | 1641.837717 | 821.422497      | 1624.811168    | 812.909222       | 1623.827152    | 812.417214       | 12 |
| 6  | 573.287867  | 287.147572      |                |                  | 555.277302     | 278.142289       | V    | 1554.805689 | 777.906483      | 1537.779140    | 769.393208       | 1536.795124    | 768.901200       | 11 |
| 7  | 701.346445  | 351.176861      | 684.319896     | 342.663586       | 683.335880     | 342.171578       | Q    | 1455.737275 | 728.372276      | 1438.710726    | 719.859001       | 1437.726710    | 719.366993       | 10 |
| 8  | 830.389038  | 415.698157      | 813.362489     | 407.184883       | 812.378473     | 406.692875       | E    | 1327.678697 | 664.342987      | 1310.652148    | 655.829712       | 1309.668132    | 655.337704       | 9  |
| 9  | 917.421066  | 459.214171      | 900.394517     | 450.700897       | 899.410501     | 450.208889       | S    | 1198.636104 | 599.821690      | 1181.609555    | 591.308416       | 1180.625539    | 590.816408       | 8  |
| 10 | 1356.646392 | 678.826834      | 1339.619843    | 670.313560       | 1338.635827    | 669.821551       | Q    | 1111.604076 | 556.305676      | 1094.577527    | 547.792402       |                |                  | 7  |
| 11 | 1455.714806 | 728.361041      | 1438.688257    | 719.847767       | 1437.704241    | 719.355758       | V    | 672.378750  | 336.693013      | 655.352201     | 328.179739       |                |                  | 6  |
| 12 | 1526.751920 | 763.879598      | 1509.725371    | 755.366324       | 1508.741355    | 754.874315       | A    | 573.310336  | 287.158806      | 556.283787     | 278.645532       |                |                  | 5  |
| 13 | 1654.810498 | 827.908887      | 1637.783949    | 819.395613       | 1636.799933    | 818.903605       | Q    | 502.273222  | 251.640249      | 485.246673     | 243.126975       |                |                  | 4  |
| 14 | 1782.869076 | 891.938176      | 1765.842527    | 883.424902       | 1764.858511    | 882.932894       | Q    | 374.214644  | 187.610960      | 357.188095     | 179.097686       |                |                  | 3  |
| 15 | 1853.906190 | 927.456733      | 1836.879641    | 918.943459       | 1835.895625    | 918.451451       | A    | 246.156066  | 123.581671      | 229.129517     | 115.068396       |                |                  | 2  |
| 16 |             |                 |                |                  |                |                  | R    | 175.118952  | 88.063114       | 158.092403     | 79.549839        |                |                  | 1  |

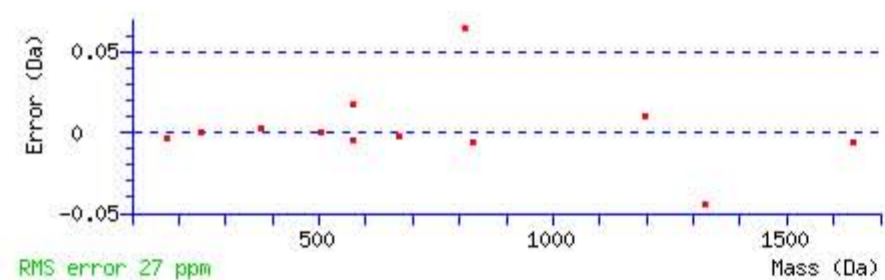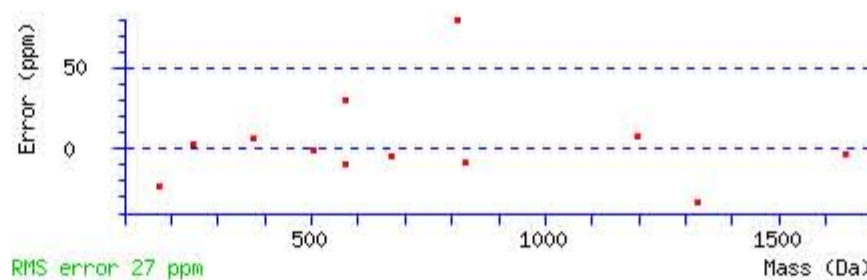

NCBI BLAST search of **DALSSVQESQVAQQAR**

(Parameters: blastp, nr protein database, expect=20000, no filter, PAM30)

Other BLAST [web gateways](#)

## All matches to this query

| Score | Mr(calc):   | Delta     | Sequence                          |
|-------|-------------|-----------|-----------------------------------|
| 66.1  | 2027.010574 | -0.007086 | <a href="#">DALSSVQESQVAQQAR</a>  |
| 53.1  | 2027.010574 | -0.007086 | <a href="#">DALSSVQESQVAQQAR</a>  |
| 42.1  | 2027.010574 | -0.007086 | <a href="#">DALSSVQESQVAQQAR</a>  |
| 33.3  | 2027.010574 | -0.007086 | <a href="#">DALSSVQESQVAQQAR</a>  |
| 2.1   | 2026.994827 | 0.008661  | <a href="#">GPHYWITRGFQMGGPPR</a> |
| 1.9   | 2026.977982 | 0.025506  | <a href="#">QEEREQEQRQALEQAR</a>  |

# MASCOT SCIENCE Mascot Search Results

## Peptide View

MS/MS Fragmentation of **DALSSVQESQVAQQAR**

Found in **APOC3\_HUMAN**, Apolipoprotein C-III OS=Homo sapiens GN=APOC3 PE=1 SV=1

Match to Query 40305: 2027.003562 from(676.675130,3+) rtinseconds(1981) index(31718)

Title: Locus:1.1.1.3353.15 File:"2013-07-02 CLN FXIII 180 min 3rd F 3.wiff"

Data file C:\Program Files (x86)\Matrix Science\Mascot Daemon\mgf9 FXIII 180 min 3rd\mascot\_daemon\_merge.mgf

Click mouse within plot area to zoom in by factor of two about that point

Or, Plot from  to  Da

Label all possible matches  Label matches used for scoring

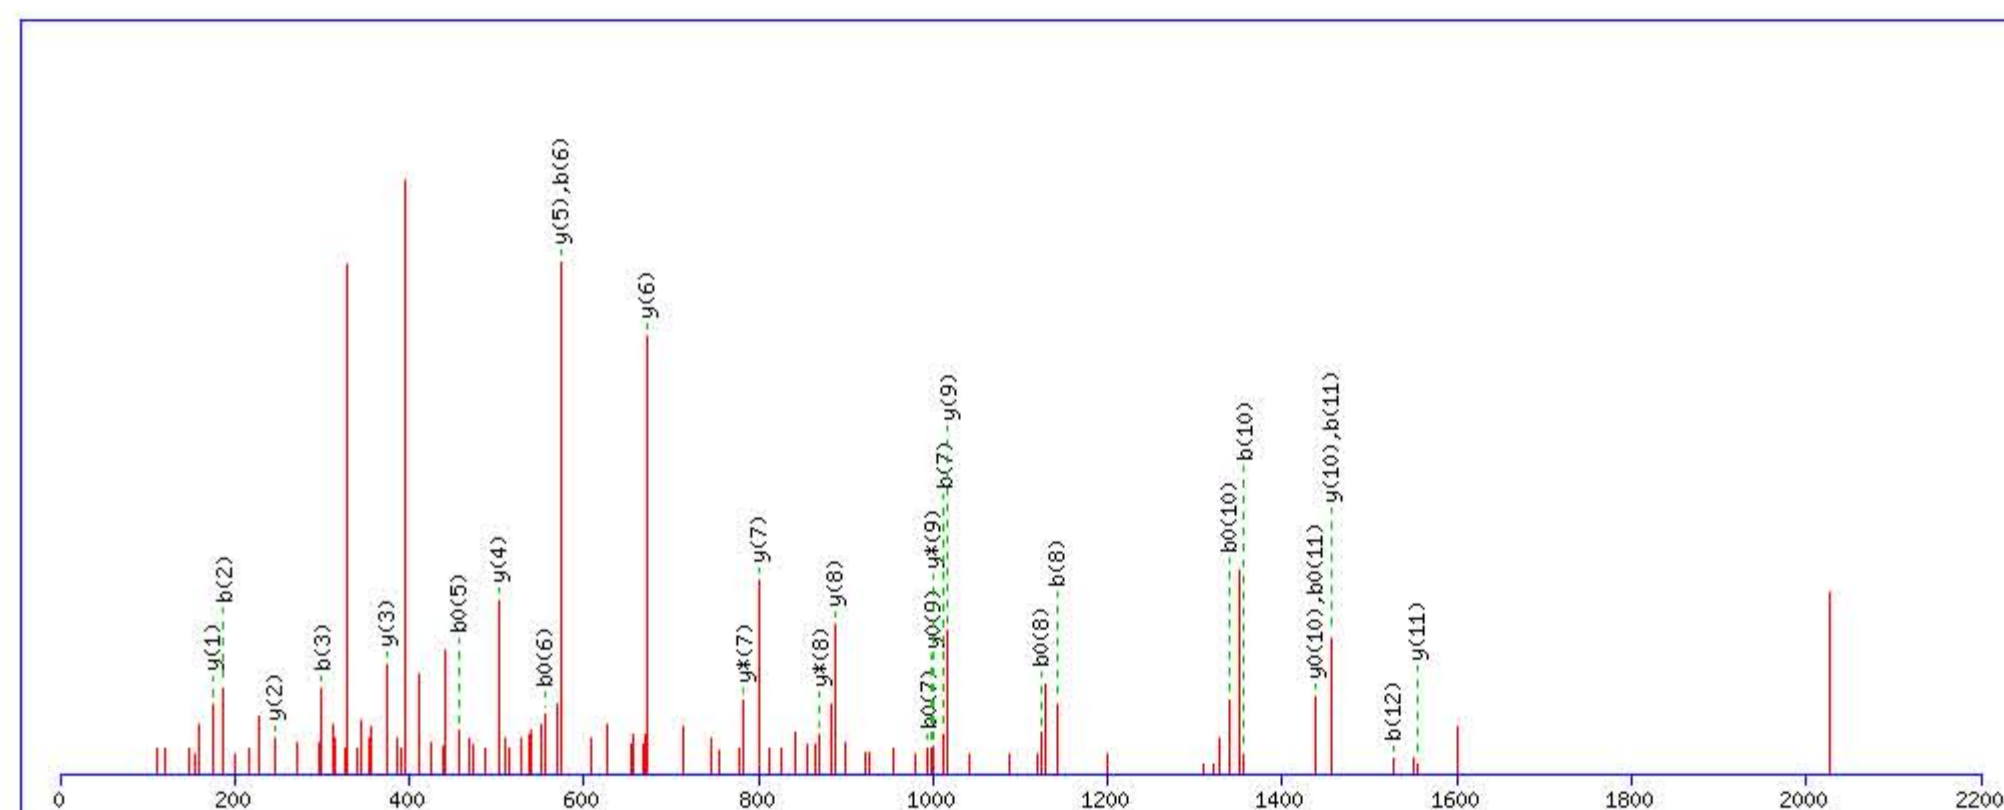

Monoisotopic mass of neutral peptide Mr(calc): 2027.010574

Fixed modifications: Carbamidomethyl (C) (apply to specified residues or termini only)

Variable modifications:

Q7 : Biotin:Thermo-21345 (Q)

Ions Score: 57 Expect: 2.2e-005

Matches : 30/154 fragment ions using 55 most intense peaks [\(help\)](#)

| #  | b                  | b <sup>++</sup> | b <sup>*</sup> | b <sup>*++</sup> | b <sup>0</sup>     | b <sup>0++</sup> | Seq. | y                  | y <sup>++</sup> | y <sup>*</sup>    | y <sup>*++</sup> | y <sup>0</sup>     | y <sup>0++</sup> | #  |
|----|--------------------|-----------------|----------------|------------------|--------------------|------------------|------|--------------------|-----------------|-------------------|------------------|--------------------|------------------|----|
| 1  | 116.034219         | 58.520748       |                |                  | 98.023654          | 49.515465        | D    |                    |                 |                   |                  |                    |                  | 16 |
| 2  | <b>187.071333</b>  | 94.039304       |                |                  | 169.060768         | 85.034022        | A    | 1912.990923        | 956.999100      | 1895.964374       | 948.485825       | 1894.980358        | 947.993817       | 15 |
| 3  | <b>300.155397</b>  | 150.581336      |                |                  | 282.144832         | 141.576054       | L    | 1841.953809        | 921.480543      | 1824.927260       | 912.967268       | 1823.943244        | 912.475260       | 14 |
| 4  | 387.187425         | 194.097351      |                |                  | 369.176860         | 185.092068       | S    | 1728.869745        | 864.938511      | 1711.843196       | 856.425236       | 1710.859180        | 855.933228       | 13 |
| 5  | 474.219453         | 237.613364      |                |                  | <b>456.208888</b>  | 228.608082       | S    | 1641.837717        | 821.422497      | 1624.811168       | 812.909222       | 1623.827152        | 812.417214       | 12 |
| 6  | <b>573.287867</b>  | 287.147572      |                |                  | <b>555.277302</b>  | 278.142289       | V    | <b>1554.805689</b> | 777.906483      | 1537.779140       | 769.393208       | 1536.795124        | 768.901200       | 11 |
| 7  | <b>1012.513193</b> | 506.760235      | 995.486644     | 498.246960       | <b>994.502628</b>  | 497.754952       | Q    | <b>1455.737275</b> | 728.372276      | 1438.710726       | 719.859001       | <b>1437.726710</b> | 719.366993       | 10 |
| 8  | <b>1141.555786</b> | 571.281531      | 1124.529237    | 562.768257       | <b>1123.545221</b> | 562.276249       | E    | <b>1016.511949</b> | 508.759613      | <b>999.485400</b> | 500.246338       | <b>998.501384</b>  | 499.754330       | 9  |
| 9  | 1228.587814        | 614.797545      | 1211.561265    | 606.284271       | 1210.577249        | 605.792263       | S    | <b>887.469356</b>  | 444.238316      | <b>870.442807</b> | 435.725042       | 869.458791         | 435.233034       | 8  |
| 10 | <b>1356.646392</b> | 678.826834      | 1339.619843    | 670.313560       | <b>1338.635827</b> | 669.821552       | Q    | <b>800.437328</b>  | 400.722302      | <b>783.410779</b> | 392.209028       |                    |                  | 7  |
| 11 | <b>1455.714806</b> | 728.361041      | 1438.688257    | 719.847767       | <b>1437.704241</b> | 719.355759       | V    | <b>672.378750</b>  | 336.693013      | 655.352201        | 328.179739       |                    |                  | 6  |
| 12 | <b>1526.751920</b> | 763.879598      | 1509.725371    | 755.366324       | 1508.741355        | 754.874316       | A    | <b>573.310336</b>  | 287.158806      | 556.283787        | 278.645532       |                    |                  | 5  |
| 13 | 1654.810498        | 827.908887      | 1637.783949    | 819.395613       | 1636.799933        | 818.903605       | Q    | <b>502.273222</b>  | 251.640249      | 485.246673        | 243.126975       |                    |                  | 4  |
| 14 | 1782.869076        | 891.938176      | 1765.842527    | 883.424902       | 1764.858511        | 882.932894       | Q    | <b>374.214644</b>  | 187.610960      | 357.188095        | 179.097686       |                    |                  | 3  |
| 15 | 1853.906190        | 927.456733      | 1836.879641    | 918.943459       | 1835.895625        | 918.451451       | A    | <b>246.156066</b>  | 123.581671      | 229.129517        | 115.068396       |                    |                  | 2  |
| 16 |                    |                 |                |                  |                    |                  | R    | <b>175.118952</b>  | 88.063114       | 158.092403        | 79.549839        |                    |                  | 1  |

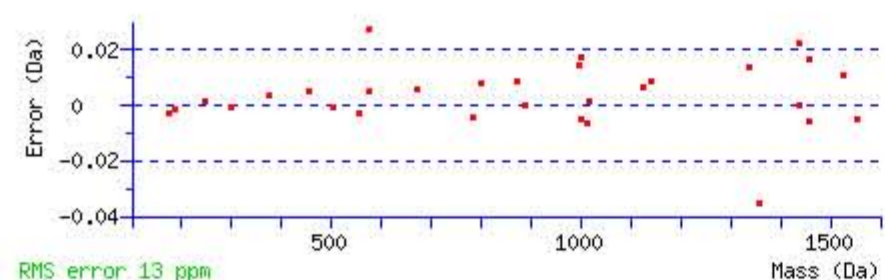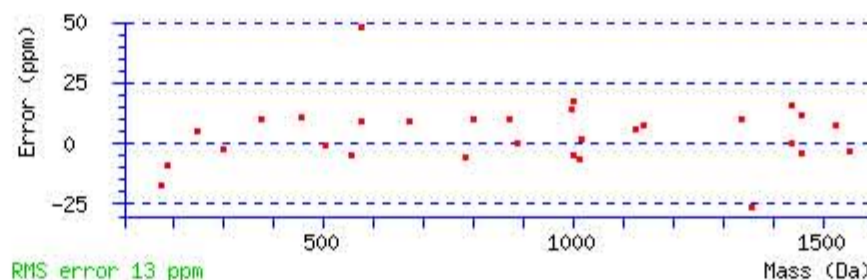

NCBI BLAST search of **DALSSVQESQVAQQAR**

(Parameters: blastp, nr protein database, expect=20000, no filter, PAM30)

Other BLAST [web gateways](#)

All matches to this query

| Score | Mr(calc):   | Delta     | Sequence                             |
|-------|-------------|-----------|--------------------------------------|
| 56.8  | 2027.010574 | -0.007012 | <a href="#">DALSSVQESQVAQQAR</a>     |
| 32.9  | 2027.010574 | -0.007012 | <a href="#">DALSSVQESQVAQQAR</a>     |
| 23.2  | 2027.010574 | -0.007012 | <a href="#">DALSSVQESQVAQQAR</a>     |
| 19.5  | 2027.010574 | -0.007012 | <a href="#">DALSSVQESQVAQQAR</a>     |
| 6.7   | 2027.021805 | -0.018243 | <a href="#">VASVESQSQEISGNRR</a>     |
| 3.3   | 2026.978012 | 0.025550  | <a href="#">AEGAQNQGQKGEQAQNGK</a>   |
| 0.5   | 2026.980667 | 0.022895  | <a href="#">LEGAIAEAEQQGEAALNDAK</a> |

# MASCOT SEARCH RESULTS

## Peptide View

MS/MS Fragmentation of **DALSSVQESQVAQQAR**

Found in **APOC3\_HUMAN**, Apolipoprotein C-III OS=Homo sapiens GN=APOC3 PE=1 SV=1

Match to Query 40311: 2027.005722 from(676.675850,3+) rtinseconds(1961) index(31562)

Title: Locus:1.1.1.3346.17 File:"2013-07-02 CLN FXIII 180 min 3rd F 3.wiff"

Data file C:\Program Files (x86)\Matrix Science\Mascot Daemon\mgf\9 FXIII 180 min 3rd\mascot\_daemon\_merge.mgf

Click mouse within plot area to zoom in by factor of two about that point

Or, Plot from  to  Da

Label all possible matches  Label matches used for scoring

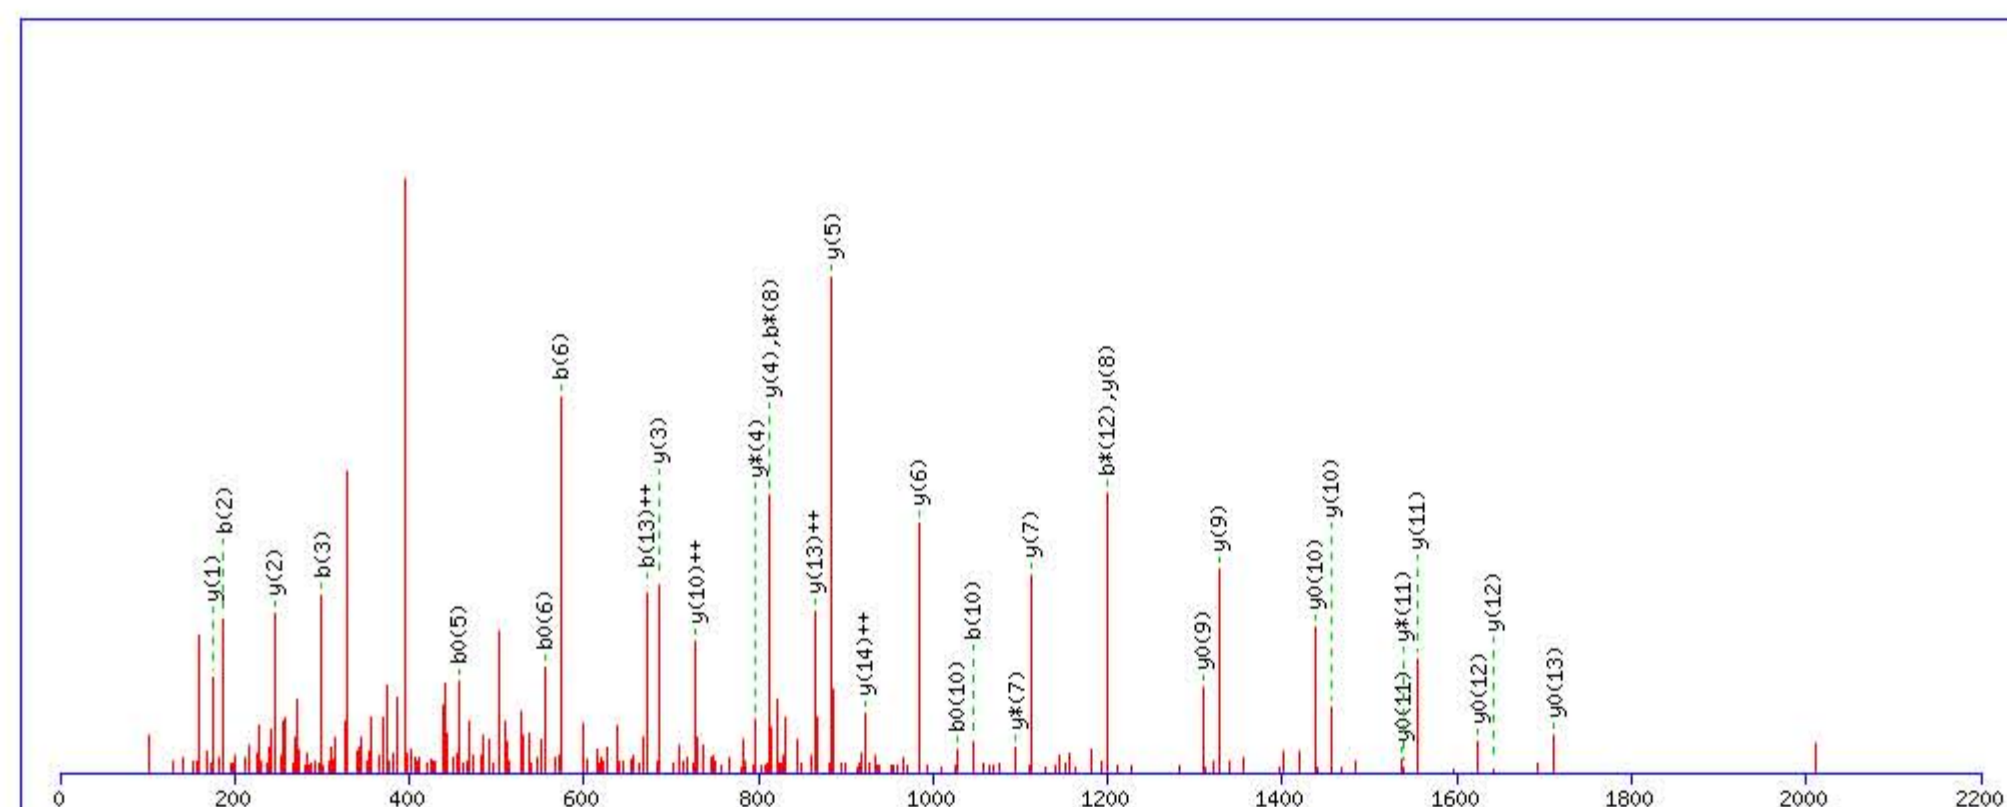

Monoisotopic mass of neutral peptide Mr(calc): 2027.010574

Fixed modifications: Carbamidomethyl (C) (apply to specified residues or termini only)

Variable modifications:

Q14 : Biotin:Thermo-21345 (Q)

Ions Score: 80 Expect: 5e-008

Matches : 33/154 fragment ions using 50 most intense peaks [\(help\)](#)

| #  | b                  | b <sup>++</sup>   | b <sup>*</sup>     | b <sup>+++</sup> | b <sup>0</sup>     | b <sup>0++</sup> | Seq. | y                  | y <sup>++</sup>   | y <sup>*</sup>     | y <sup>+++</sup> | y <sup>0</sup>     | y <sup>0++</sup> | #  |
|----|--------------------|-------------------|--------------------|------------------|--------------------|------------------|------|--------------------|-------------------|--------------------|------------------|--------------------|------------------|----|
| 1  | 116.034219         | 58.520748         |                    |                  | 98.023654          | 49.515465        | D    |                    |                   |                    |                  |                    |                  | 16 |
| 2  | <b>187.071333</b>  | 94.039304         |                    |                  | 169.060768         | 85.034022        | A    | 1912.990923        | 956.999100        | 1895.964374        | 948.485825       | 1894.980358        | 947.993817       | 15 |
| 3  | <b>300.155397</b>  | 150.581336        |                    |                  | 282.144832         | 141.576054       | L    | 1841.953809        | <b>921.480543</b> | 1824.927260        | 912.967268       | 1823.943244        | 912.475260       | 14 |
| 4  | 387.187425         | 194.097351        |                    |                  | 369.176860         | 185.092068       | S    | 1728.869745        | <b>864.938511</b> | 1711.843196        | 856.425236       | <b>1710.859180</b> | 855.933228       | 13 |
| 5  | 474.219453         | 237.613364        |                    |                  | <b>456.208888</b>  | 228.608082       | S    | <b>1641.837717</b> | 821.422497        | 1624.811168        | 812.909222       | <b>1623.827152</b> | 812.417214       | 12 |
| 6  | <b>573.287867</b>  | 287.147572        |                    |                  | <b>555.277302</b>  | 278.142289       | V    | <b>1554.805689</b> | 777.906483        | <b>1537.779140</b> | 769.393208       | <b>1536.795124</b> | 768.901200       | 11 |
| 7  | 701.346445         | 351.176861        | 684.319896         | 342.663586       | 683.335880         | 342.171578       | Q    | <b>1455.737275</b> | <b>728.372276</b> | 1438.710726        | 719.859001       | <b>1437.726710</b> | 719.366993       | 10 |
| 8  | 830.389038         | 415.698157        | <b>813.362489</b>  | 407.184883       | 812.378473         | 406.692875       | E    | <b>1327.678697</b> | 664.342987        | 1310.652148        | 655.829712       | <b>1309.668132</b> | 655.337704       | 9  |
| 9  | 917.421066         | 459.214171        | 900.394517         | 450.700897       | 899.410501         | 450.208889       | S    | <b>1198.636104</b> | 599.821690        | 1181.609555        | 591.308416       | 1180.625539        | 590.816408       | 8  |
| 10 | <b>1045.479644</b> | 523.243460        | 1028.453095        | 514.730186       | <b>1027.469079</b> | 514.238178       | Q    | <b>1111.604076</b> | 556.305676        | <b>1094.577527</b> | 547.792402       |                    |                  | 7  |
| 11 | 1144.548058        | 572.777667        | 1127.521509        | 564.264393       | 1126.537493        | 563.772385       | V    | <b>983.545498</b>  | 492.276387        | 966.518949         | 483.763113       |                    |                  | 6  |
| 12 | 1215.585172        | 608.296224        | <b>1198.558623</b> | 599.782950       | 1197.574607        | 599.290942       | A    | <b>884.477084</b>  | 442.742180        | 867.450535         | 434.228906       |                    |                  | 5  |
| 13 | 1343.643750        | <b>672.325513</b> | 1326.617201        | 663.812239       | 1325.633185        | 663.320230       | Q    | <b>813.439970</b>  | 407.223623        | <b>796.413421</b>  | 398.710349       |                    |                  | 4  |
| 14 | 1782.869076        | 891.938176        | 1765.842527        | 883.424902       | 1764.858511        | 882.932894       | Q    | <b>685.381392</b>  | 343.194334        | 668.354843         | 334.681060       |                    |                  | 3  |
| 15 | 1853.906190        | 927.456733        | 1836.879641        | 918.943459       | 1835.895625        | 918.451451       | A    | <b>246.156066</b>  | 123.581671        | 229.129517         | 115.068396       |                    |                  | 2  |
| 16 |                    |                   |                    |                  |                    |                  | R    | <b>175.118952</b>  | 88.063114         | 158.092403         | 79.549839        |                    |                  | 1  |

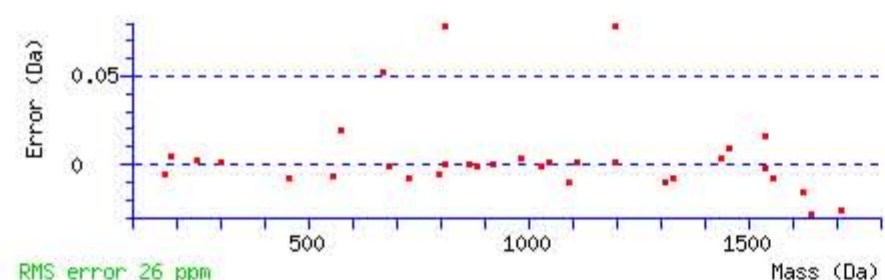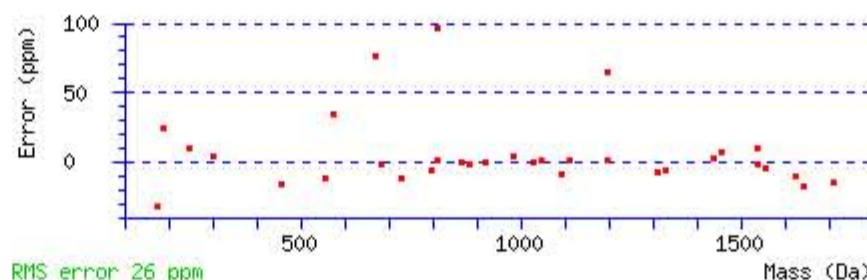

NCBI BLAST search of **DALSSVQESQVAQQAR**

(Parameters: blastp, nr protein database, expect=20000, no filter, PAM30)

Other BLAST [web gateways](#)

## All matches to this query

| Score | Mr(calc):   | Delta     | Sequence                         |
|-------|-------------|-----------|----------------------------------|
| 79.7  | 2027.010574 | -0.004852 | <a href="#">DALSSVQESQVAQQAR</a> |
| 79.4  | 2027.010574 | -0.004852 | <a href="#">DALSSVQESQVAQQAR</a> |
| 73.7  | 2027.010574 | -0.004852 | <a href="#">DALSSVQESQVAQQAR</a> |
| 37.2  | 2027.010574 | -0.004852 | <a href="#">DALSSVQESQVAQQAR</a> |
| 1.8   | 2026.977982 | 0.027740  | <a href="#">QEEREQEQRQALEQAR</a> |
| 1.2   | 2027.029633 | -0.023911 | <a href="#">QESEHSHKHLIELRR</a>  |

# Mascot Search Results

## Peptide View

MS/MS Fragmentation of **DALSSVQESQVAQQAR**

Found in **APOC3\_HUMAN**, Apolipoprotein C-III OS=Homo sapiens GN=APOC3 PE=1 SV=1

Match to Query 45727: 2338.177062 from(780.399630,3+) rtinseconds(2225) index(33193)

Title: Locus:1.1.1.3438.22 File:"2013-07-02 CLN FXIII 180 min 3rd F 3.wiff"

Data file C:\Program Files (x86)\Matrix Science\Mascot Daemon\mgf9 FXIII 180 min 3rd\mascot\_daemon\_merge.mgf

Click mouse within plot area to zoom in by factor of two about that point

Or, Plot from  to  Da

Label all possible matches  Label matches used for scoring

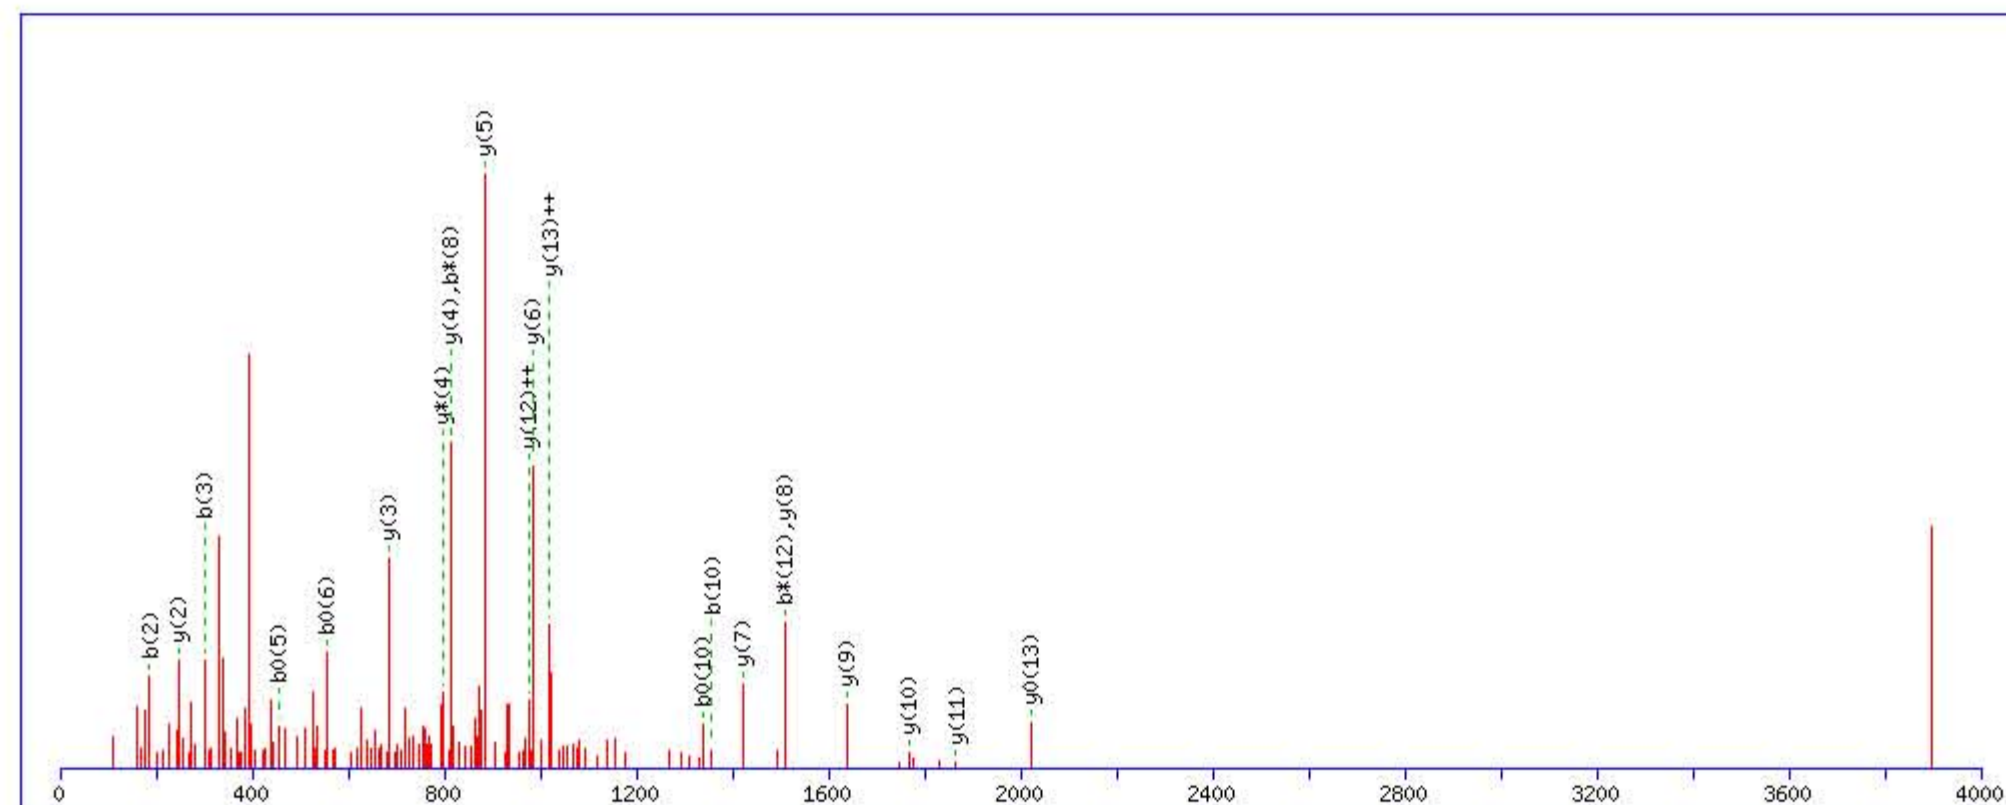

Monoisotopic mass of neutral peptide Mr(calc): 2338.177322

Fixed modifications: Carbamidomethyl (C) (apply to specified residues or termini only)

Variable modifications:

Q10 : Biotin:Thermo-21345 (Q)

Q14 : Biotin:Thermo-21345 (Q)

Ions Score: 58 Expect: 4.5e-005

Matches : 22/154 fragment ions using 34 most intense peaks [\(help\)](#)

| #  | b                  | b <sup>++</sup> | b <sup>*</sup>     | b <sup>*++</sup> | b <sup>0</sup>     | b <sup>0++</sup> | Seq. | y                  | y <sup>++</sup>    | y <sup>*</sup>    | y <sup>*++</sup> | y <sup>0</sup>     | y <sup>0++</sup> | #  |
|----|--------------------|-----------------|--------------------|------------------|--------------------|------------------|------|--------------------|--------------------|-------------------|------------------|--------------------|------------------|----|
| 1  | 116.034219         | 58.520748       |                    |                  | 98.023654          | 49.515465        | D    |                    |                    |                   |                  |                    |                  | 16 |
| 2  | <b>187.071333</b>  | 94.039304       |                    |                  | 169.060768         | 85.034022        | A    | 2224.157671        | 1112.582473        | 2207.131122       | 1104.069199      | 2206.147106        | 1103.577191      | 15 |
| 3  | <b>300.155397</b>  | 150.581336      |                    |                  | 282.144832         | 141.576054       | L    | 2153.120557        | 1077.063916        | 2136.094008       | 1068.550642      | 2135.109992        | 1068.058634      | 14 |
| 4  | 387.187425         | 194.097351      |                    |                  | 369.176860         | 185.092068       | S    | 2040.036493        | <b>1020.521885</b> | 2023.009944       | 1012.008610      | <b>2022.025928</b> | 1011.516602      | 13 |
| 5  | 474.219453         | 237.613364      |                    |                  | <b>456.208888</b>  | 228.608082       | S    | 1953.004465        | <b>977.005871</b>  | 1935.977916       | 968.492596       | 1934.993900        | 968.000588       | 12 |
| 6  | 573.287867         | 287.147572      |                    |                  | <b>555.277302</b>  | 278.142289       | V    | <b>1865.972437</b> | 933.489857         | 1848.945888       | 924.976582       | 1847.961872        | 924.484574       | 11 |
| 7  | 701.346445         | 351.176861      | 684.319896         | 342.663586       | 683.335880         | 342.171578       | Q    | <b>1766.904023</b> | 883.955650         | 1749.877474       | 875.442375       | 1748.893458        | 874.950367       | 10 |
| 8  | 830.389038         | 415.698157      | <b>813.362489</b>  | 407.184883       | 812.378473         | 406.692875       | E    | <b>1638.845445</b> | 819.926361         | 1621.818896       | 811.413086       | 1620.834880        | 810.921078       | 9  |
| 9  | 917.421066         | 459.214171      | 900.394517         | 450.700897       | 899.410501         | 450.208889       | S    | <b>1509.802852</b> | 755.405064         | 1492.776303       | 746.891790       | 1491.792287        | 746.399782       | 8  |
| 10 | <b>1356.646392</b> | 678.826834      | 1339.619843        | 670.313560       | <b>1338.635827</b> | 669.821551       | Q    | <b>1422.770824</b> | 711.889050         | 1405.744275       | 703.375776       |                    |                  | 7  |
| 11 | 1455.714806        | 728.361041      | 1438.688257        | 719.847767       | 1437.704241        | 719.355758       | V    | <b>983.545498</b>  | 492.276387         | 966.518949        | 483.763113       |                    |                  | 6  |
| 12 | 1526.751920        | 763.879598      | <b>1509.725371</b> | 755.366324       | 1508.741355        | 754.874315       | A    | <b>884.477084</b>  | 442.742180         | 867.450535        | 434.228906       |                    |                  | 5  |
| 13 | 1654.810498        | 827.908887      | 1637.783949        | 819.395613       | 1636.799933        | 818.903605       | Q    | <b>813.439970</b>  | 407.223623         | <b>796.413421</b> | 398.710349       |                    |                  | 4  |
| 14 | 2094.035824        | 1047.521550     | 2077.009275        | 1039.008275      | 2076.025259        | 1038.516267      | Q    | <b>685.381392</b>  | 343.194334         | 668.354843        | 334.681060       |                    |                  | 3  |
| 15 | 2165.072938        | 1083.040107     | 2148.046389        | 1074.526833      | 2147.062373        | 1074.034825      | A    | <b>246.156066</b>  | 123.581671         | 229.129517        | 115.068397       |                    |                  | 2  |
| 16 |                    |                 |                    |                  |                    |                  | R    | 175.118952         | 88.063114          | 158.092403        | 79.549839        |                    |                  | 1  |

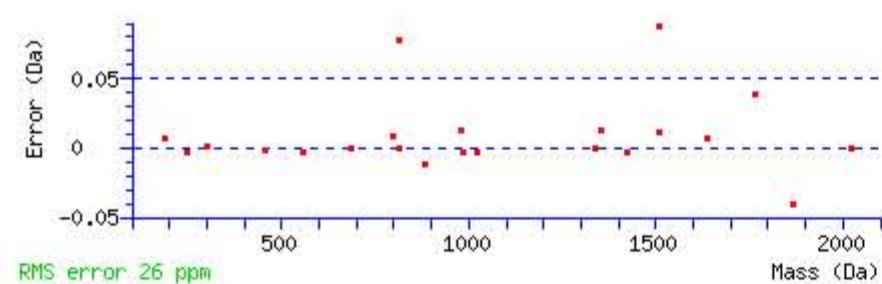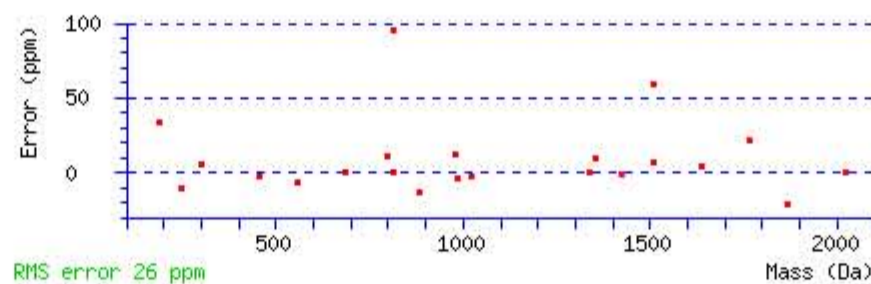

NCBI BLAST search of [DALSSVQESQVAQQAR](#)

(Parameters: blastp, nr protein database, expect=20000, no filter, PAM30)

Other BLAST [web gateways](#)

## All matches to this query

| Score | Mr(calc):   | Delta     | Sequence                         |
|-------|-------------|-----------|----------------------------------|
| 57.9  | 2338.177322 | -0.000260 | <a href="#">DALSSVQESQVAQQAR</a> |
| 46.6  | 2338.177322 | -0.000260 | <a href="#">DALSSVQESQVAQQAR</a> |
| 29.1  | 2338.177322 | -0.000260 | <a href="#">DALSSVQESQVAQQAR</a> |
| 23.3  | 2338.177322 | -0.000260 | <a href="#">DALSSVQESQVAQQAR</a> |
| 20.6  | 2338.177322 | -0.000260 | <a href="#">DALSSVQESQVAQQAR</a> |
| 6.5   | 2338.177322 | -0.000260 | <a href="#">DALSSVQESQVAQQAR</a> |

# MASCOT Search Results

## Peptide View

MS/MS Fragmentation of **DALSSVQESQVAQQAR**

Found in **APOC3\_HUMAN**, Apolipoprotein C-III OS=Homo sapiens GN=APOC3 PE=1 SV=1

Match to Query 45728: 2338.178172 from(780.400000,3+) rtinseconds(2216) index(33119)

Title: Locus:1.1.1.3435.14 File:"2013-07-02 CLN FXIII 180 min 3rd F 3.wiff"

Data file C:\Program Files (x86)\Matrix Science\Mascot Daemon\mgf9 FXIII 180 min 3rd\mascot\_daemon\_merge.mgf

Click mouse within plot area to zoom in by factor of two about that point

Or, Plot from  to  Da

Label all possible matches  Label matches used for scoring

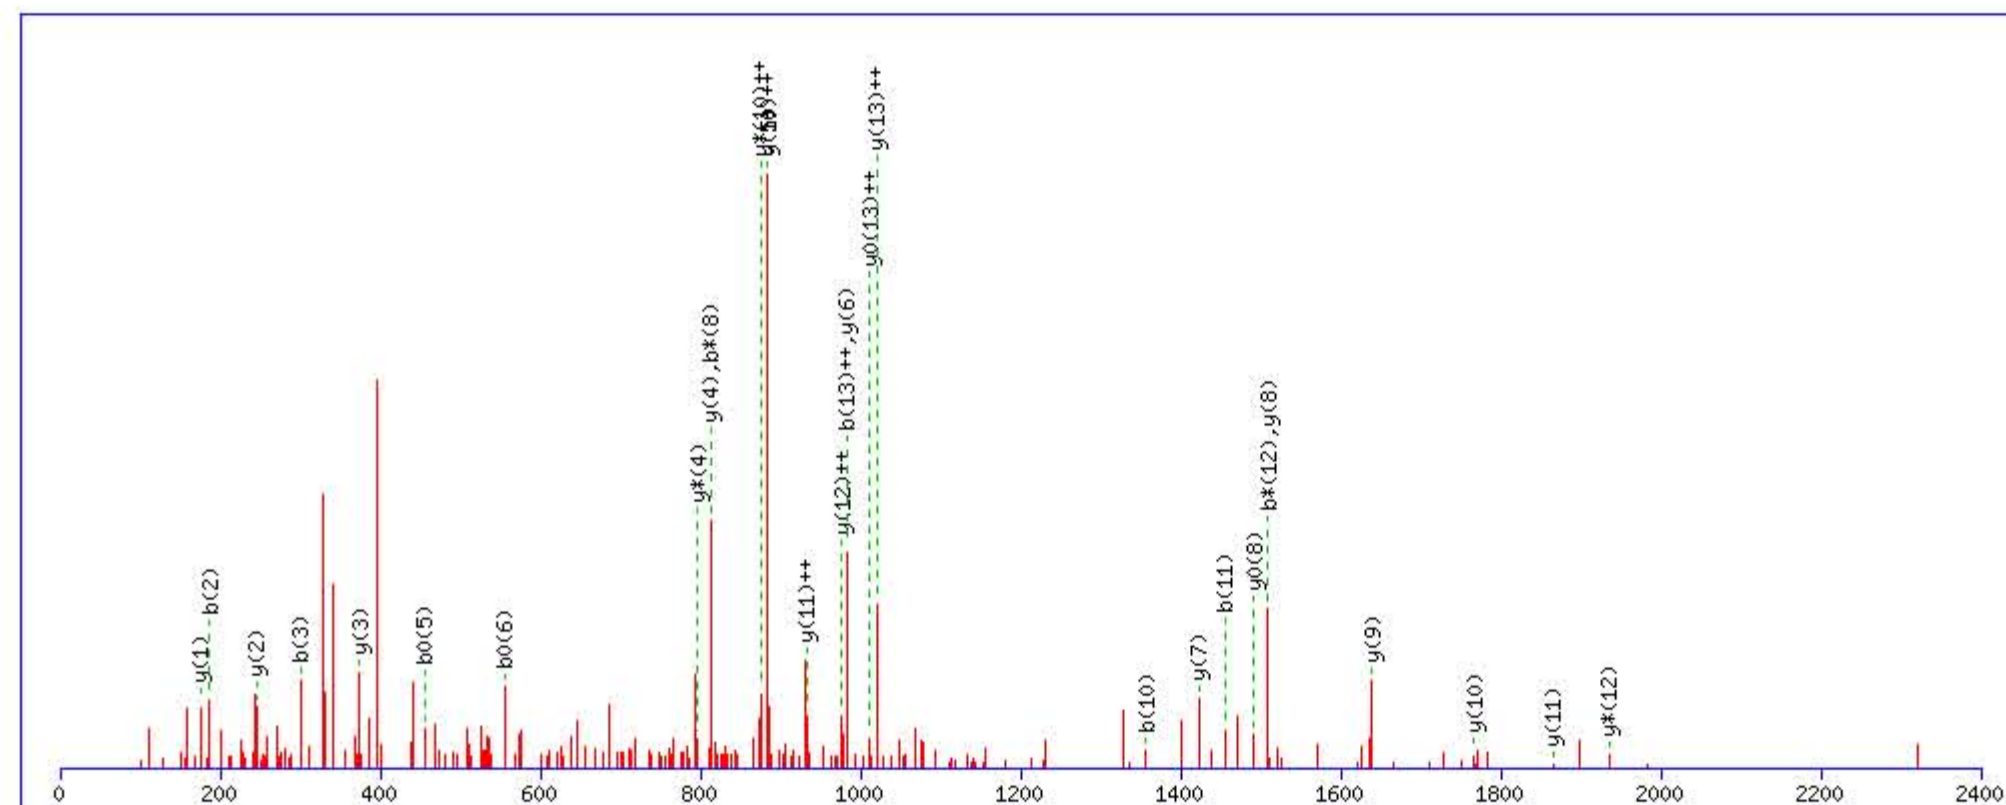

Monoisotopic mass of neutral peptide Mr(calc): 2338.177322

Fixed modifications: Carbamidomethyl (C) (apply to specified residues or termini only)

Variable modifications:

Q10 : Biotin:Thermo-21345 (Q)

Q13 : Biotin:Thermo-21345 (Q)

Ions Score: 38 Expect: 0.0041

Matches : 29/154 fragment ions using 73 most intense peaks [\(help\)](#)

| #  | b                  | b <sup>++</sup>   | b <sup>*</sup>     | b <sup>*++</sup> | b <sup>0</sup>    | b <sup>0++</sup> | Seq. | y                  | y <sup>++</sup>    | y <sup>*</sup>     | y <sup>*++</sup>  | y <sup>0</sup>     | y <sup>0++</sup>   | #  |
|----|--------------------|-------------------|--------------------|------------------|-------------------|------------------|------|--------------------|--------------------|--------------------|-------------------|--------------------|--------------------|----|
| 1  | 116.034219         | 58.520748         |                    |                  | 98.023654         | 49.515465        | D    |                    |                    |                    |                   |                    |                    | 16 |
| 2  | <b>187.071333</b>  | 94.039304         |                    |                  | 169.060768        | 85.034022        | A    | 2224.157671        | 1112.582473        | 2207.131122        | 1104.069199       | 2206.147106        | 1103.577191        | 15 |
| 3  | <b>300.155397</b>  | 150.581336        |                    |                  | 282.144832        | 141.576054       | L    | 2153.120557        | 1077.063916        | 2136.094008        | 1068.550642       | 2135.109992        | 1068.058634        | 14 |
| 4  | 387.187425         | 194.097351        |                    |                  | 369.176860        | 185.092068       | S    | 2040.036493        | <b>1020.521885</b> | 2023.009944        | 1012.008610       | 2022.025928        | <b>1011.516602</b> | 13 |
| 5  | 474.219453         | 237.613364        |                    |                  | <b>456.208888</b> | 228.608082       | S    | 1953.004465        | <b>977.005871</b>  | <b>1935.977916</b> | 968.492596        | 1934.993900        | 968.000588         | 12 |
| 6  | 573.287867         | 287.147572        |                    |                  | <b>555.277302</b> | 278.142289       | V    | <b>1865.972437</b> | <b>933.489857</b>  | 1848.945888        | 924.976582        | 1847.961872        | 924.484574         | 11 |
| 7  | 701.346445         | 351.176861        | 684.319896         | 342.663586       | 683.335880        | 342.171578       | Q    | <b>1766.904023</b> | <b>883.955650</b>  | 1749.877474        | <b>875.442375</b> | 1748.893458        | 874.950367         | 10 |
| 8  | 830.389038         | 415.698157        | <b>813.362489</b>  | 407.184883       | 812.378473        | 406.692875       | E    | <b>1638.845445</b> | 819.926361         | 1621.818896        | 811.413086        | 1620.834880        | 810.921078         | 9  |
| 9  | 917.421066         | 459.214171        | 900.394517         | 450.700897       | 899.410501        | 450.208889       | S    | <b>1509.802852</b> | 755.405064         | 1492.776303        | 746.891790        | <b>1491.792287</b> | 746.399782         | 8  |
| 10 | <b>1356.646392</b> | 678.826834        | 1339.619843        | 670.313560       | 1338.635827       | 669.821551       | Q    | <b>1422.770824</b> | 711.889050         | 1405.744275        | 703.375776        |                    |                    | 7  |
| 11 | <b>1455.714806</b> | 728.361041        | 1438.688257        | 719.847767       | 1437.704241       | 719.355758       | V    | <b>983.545498</b>  | 492.276387         | 966.518949         | 483.763113        |                    |                    | 6  |
| 12 | 1526.751920        | 763.879598        | <b>1509.725371</b> | 755.366324       | 1508.741355       | 754.874315       | A    | <b>884.477084</b>  | 442.742180         | 867.450535         | 434.228906        |                    |                    | 5  |
| 13 | 1965.977246        | <b>983.492261</b> | 1948.950697        | 974.978987       | 1947.966681       | 974.486979       | Q    | <b>813.439970</b>  | 407.223623         | <b>796.413421</b>  | 398.710349        |                    |                    | 4  |
| 14 | 2094.035824        | 1047.521550       | 2077.009275        | 1039.008275      | 2076.025259       | 1038.516267      | Q    | <b>374.214644</b>  | 187.610960         | 357.188095         | 179.097686        |                    |                    | 3  |
| 15 | 2165.072938        | 1083.040107       | 2148.046389        | 1074.526833      | 2147.062373       | 1074.034825      | A    | <b>246.156066</b>  | 123.581671         | 229.129517         | 115.068397        |                    |                    | 2  |
| 16 |                    |                   |                    |                  |                   |                  | R    | <b>175.118952</b>  | 88.063114          | 158.092403         | 79.549839         |                    |                    | 1  |

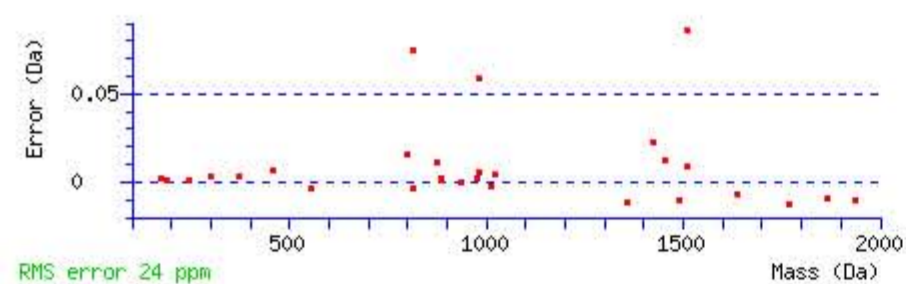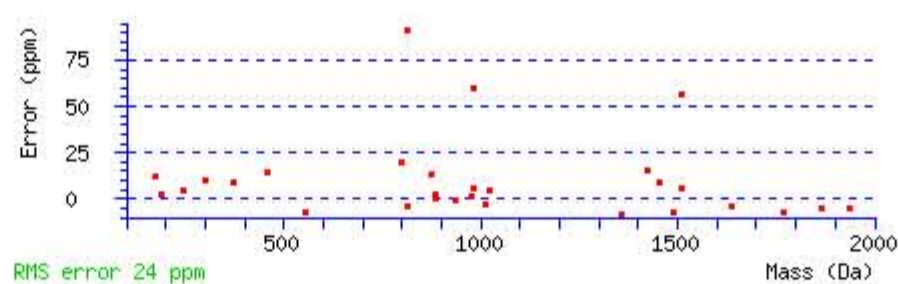

NCBI BLAST search of **DALSSVQESQVAQQAR**

(Parameters: blastp, nr protein database, expect=20000, no filter, PAM30)

Other BLAST [web gateways](#)

## All matches to this query

| Score | Mr(calc):   | Delta    | Sequence                         |
|-------|-------------|----------|----------------------------------|
| 38.2  | 2338.177322 | 0.000850 | <a href="#">DALSSVQESQVAQQAR</a> |
| 38.2  | 2338.177322 | 0.000850 | <a href="#">DALSSVQESQVAQQAR</a> |
| 22.9  | 2338.177322 | 0.000850 | <a href="#">DALSSVQESQVAQQAR</a> |
| 22.9  | 2338.177322 | 0.000850 | <a href="#">DALSSVQESQVAQQAR</a> |
| 15.3  | 2338.177322 | 0.000850 | <a href="#">DALSSVQESQVAQQAR</a> |
| 7.4   | 2338.177322 | 0.000850 | <a href="#">DALSSVQESQVAQQAR</a> |

# MASCOT Search Results

## Peptide View

MS/MS Fragmentation of **EQVAEVR**

Found in **APOE\_HUMAN**, Apolipoprotein E OS=Homo sapiens GN=APOE PE=1 SV=1

Match to Query 16026: 1140.592548 from(571.303550,2+) rtinseconds(1554) index(29119)

Title: Locus:1.1.1.3204.11 File:"2013-07-02 CLN FXIII 180 min 3rd F 3.wiff"

Data file C:\Program Files (x86)\Matrix Science\Mascot Daemon\mgf9 FXIII 180 min 3rd\mascot\_daemon\_merge.mgf

Click mouse within plot area to zoom in by factor of two about that point

Or, Plot from  to  Da

Label all possible matches  Label matches used for scoring

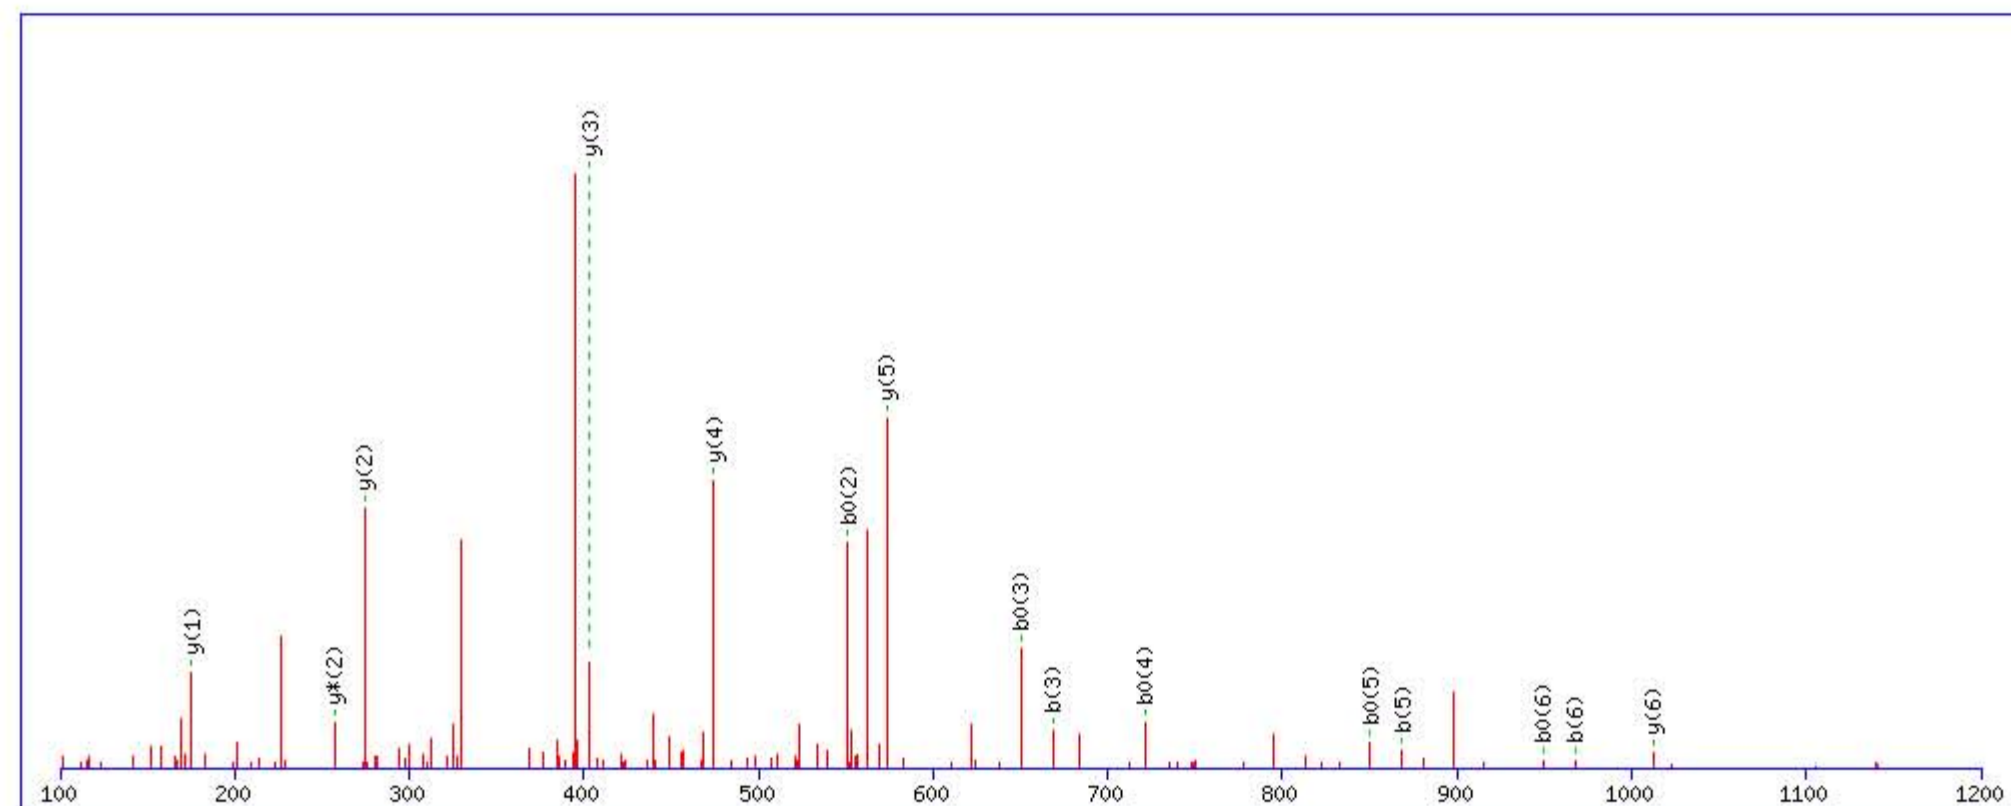

Monoisotopic mass of neutral peptide Mr(calc): 1140.596115

Fixed modifications: Carbamidomethyl (C) (apply to specified residues or termini only)

Variable modifications:

Q2 : Biotin:Thermo-21345 (Q)

Ions Score: 33 Expect: 0.011

Matches : 15/66 fragment ions using 31 most intense peaks [\(help\)](#)

| # | b          | b <sup>++</sup> | b*         | b <sup>+++</sup> | b <sup>0</sup> | b <sup>0++</sup> | Seq. | y           | y <sup>++</sup> | y*         | y <sup>+++</sup> | y <sup>0</sup> | y <sup>0++</sup> | # |
|---|------------|-----------------|------------|------------------|----------------|------------------|------|-------------|-----------------|------------|------------------|----------------|------------------|---|
| 1 | 130.049869 | 65.528572       |            |                  | 112.039304     | 56.523290        | E    |             |                 |            |                  |                |                  | 7 |
| 2 | 569.275195 | 285.141236      | 552.248646 | 276.627961       | 551.264630     | 276.135953       | Q    | 1012.560813 | 506.784044      | 995.534264 | 498.270770       | 994.550248     | 497.778762       | 6 |
| 3 | 668.343609 | 334.675443      | 651.317060 | 326.162168       | 650.333044     | 325.670160       | V    | 573.335487  | 287.171382      | 556.308938 | 278.658107       | 555.324922     | 278.166099       | 5 |
| 4 | 739.380723 | 370.194000      | 722.354174 | 361.680725       | 721.370158     | 361.188717       | A    | 474.267073  | 237.637174      | 457.240524 | 229.123900       | 456.256508     | 228.631892       | 4 |
| 5 | 868.423316 | 434.715296      | 851.396767 | 426.202022       | 850.412751     | 425.710014       | E    | 403.229959  | 202.118617      | 386.203410 | 193.605343       | 385.219394     | 193.113335       | 3 |
| 6 | 967.491730 | 484.249503      | 950.465181 | 475.736228       | 949.481165     | 475.244220       | V    | 274.187366  | 137.597321      | 257.160817 | 129.084046       |                |                  | 2 |
| 7 |            |                 |            |                  |                |                  | R    | 175.118952  | 88.063114       | 158.092403 | 79.549839        |                |                  | 1 |

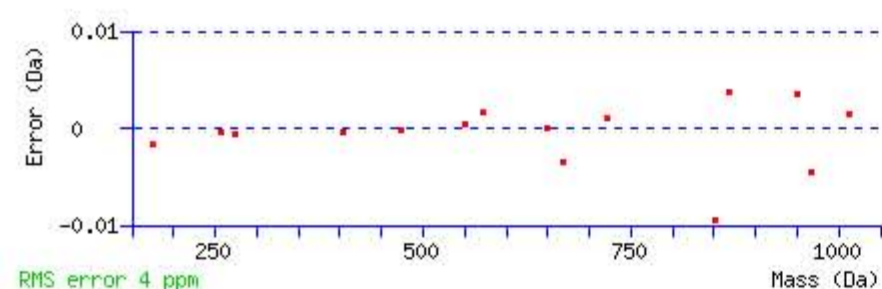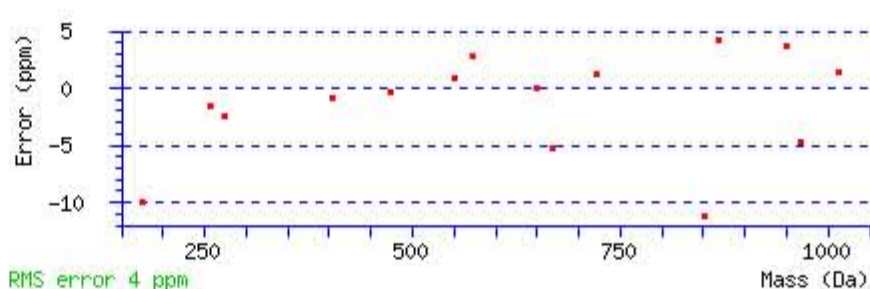

NCBI BLAST search of **EQVAEVR**

(Parameters: blastp, nr protein database, expect=20000, no filter, PAM30)

Other BLAST [web gateways](#)

## All matches to this query

| Score | Mr(calc):   | Delta     | Sequence                    |
|-------|-------------|-----------|-----------------------------|
| 33.3  | 1140.596115 | -0.003567 | <a href="#">EQVAEVR</a>     |
| 13.9  | 1140.596115 | -0.003567 | <a href="#">QEVALDLR</a>    |
| 13.7  | 1140.596115 | -0.003567 | <a href="#">EQALDVR</a>     |
| 9.3   | 1140.599945 | -0.007397 | <a href="#">ERVALSHSSR</a>  |
| 5.9   | 1140.588715 | 0.003833  | <a href="#">RLAADDPEVR</a>  |
| 5.5   | 1140.596115 | -0.003567 | <a href="#">QEGLDLR</a>     |
| 4.2   | 1140.577484 | 0.015064  | <a href="#">ADSVSELPAPR</a> |
| 4.0   | 1140.596115 | -0.003567 | <a href="#">EQSTLPR</a>     |
| 3.8   | 1140.599945 | -0.007397 | <a href="#">SSSKLAQHQR</a>  |
| 3.8   | 1140.596115 | -0.003567 | <a href="#">LQEGEVR</a>     |

# **MASCOT** Mascot Search Results

## Peptide View

MS/MS Fragmentation of **ELQAAQAR**

Found in **APOE\_HUMAN**, Apolipoprotein E OS=Homo sapiens GN=APOE PE=1 SV=1

Match to Query 17681: 1196.625028 from(599.319790,2+) rtinseconds(1504) index(42949)

Title: Locus:1.1.1.3236.17 File:"2013-07-02 CLN FXIII 180 min 3rd F 4.wiff"

Data file C:\Program Files (x86)\Matrix Science\Mascot Daemon\mgf\9 FXIII 180 min 3rd\mascot\_daemon\_merge.mgf

Click mouse within plot area to zoom in by factor of two about that point

Or, Plot from  to  Da

Label all possible matches  Label matches used for scoring

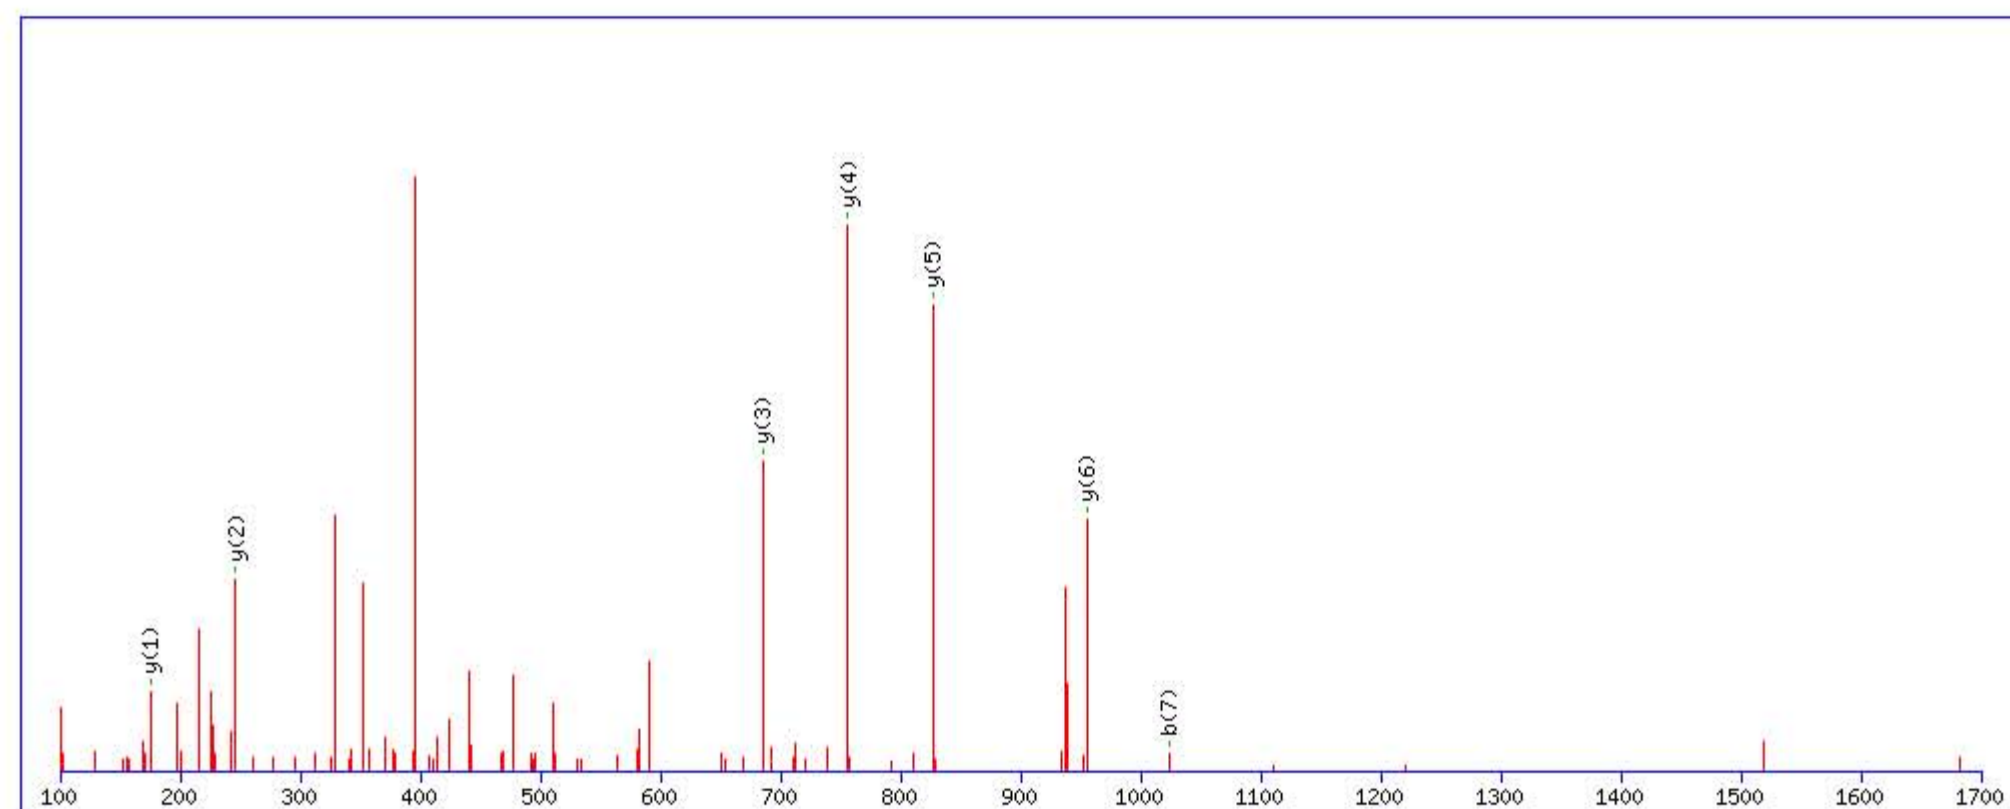

Monoisotopic mass of neutral peptide Mr(calc): 1196.633545

Fixed modifications: Carbamidomethyl (C) (apply to specified residues or termini only)

Variable modifications:

Q6 : Biotin:Thermo-21345 (Q)

Ions Score: 48 Expect: 0.00024

Matches : 7/66 fragment ions using 11 most intense peaks [\(help\)](#)

| # | b                  | b <sup>++</sup> | b <sup>*</sup> | b <sup>+++</sup> | b <sup>0</sup> | b <sup>0++</sup> | Seq. | y                 | y <sup>++</sup> | y <sup>*</sup> | y <sup>+++</sup> | # |
|---|--------------------|-----------------|----------------|------------------|----------------|------------------|------|-------------------|-----------------|----------------|------------------|---|
| 1 | 130.049869         | 65.528572       |                |                  | 112.039304     | 56.523290        | E    |                   |                 |                |                  | 8 |
| 2 | 243.133933         | 122.070605      |                |                  | 225.123368     | 113.065322       | L    | 1068.598262       | 534.802769      | 1051.571713    | 526.289495       | 7 |
| 3 | 371.192511         | 186.099894      | 354.165962     | 177.586619       | 353.181946     | 177.094611       | Q    | <b>955.514198</b> | 478.260737      | 938.487649     | 469.747463       | 6 |
| 4 | 442.229625         | 221.618450      | 425.203076     | 213.105176       | 424.219060     | 212.613168       | A    | <b>827.455620</b> | 414.231448      | 810.429071     | 405.718174       | 5 |
| 5 | 513.266739         | 257.137008      | 496.240190     | 248.623733       | 495.256174     | 248.131725       | A    | <b>756.418506</b> | 378.712891      | 739.391957     | 370.199617       | 4 |
| 6 | 952.492065         | 476.749671      | 935.465516     | 468.236396       | 934.481500     | 467.744388       | Q    | <b>685.381392</b> | 343.194334      | 668.354843     | 334.681060       | 3 |
| 7 | <b>1023.529179</b> | 512.268227      | 1006.502630    | 503.754953       | 1005.518614    | 503.262945       | A    | <b>246.156066</b> | 123.581671      | 229.129517     | 115.068397       | 2 |
| 8 |                    |                 |                |                  |                |                  | R    | <b>175.118952</b> | 88.063114       | 158.092403     | 79.549840        | 1 |

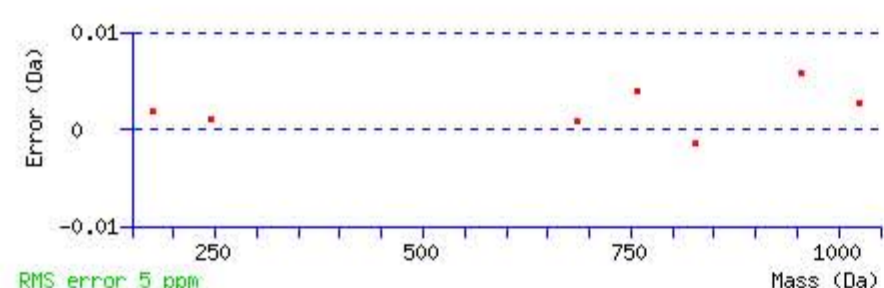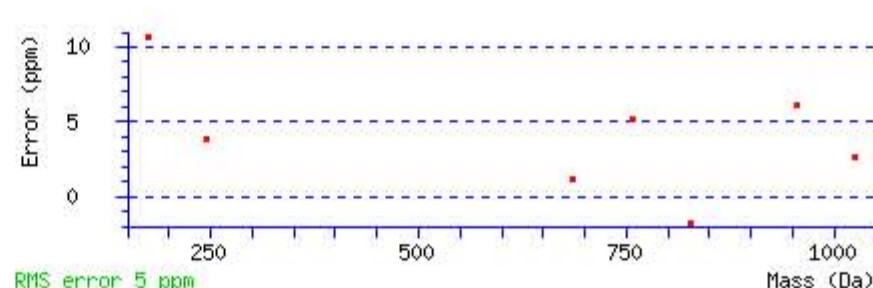

NCBI BLAST search of [ELQAAQAR](#)

(Parameters: blastp, nr protein database, expect=20000, no filter, PAM30)

Other BLAST [web gateways](#)

## All matches to this query

| Score | Mr(calc):   | Delta     | Sequence                     |
|-------|-------------|-----------|------------------------------|
| 48.0  | 1196.633545 | -0.008517 | <a href="#">ELQAAQAR</a>     |
| 12.5  | 1196.641434 | -0.016406 | <a href="#">STRPQAWVPR</a>   |
| 9.2   | 1196.627029 | -0.002001 | <a href="#">AGMPRQAR</a>     |
| 8.6   | 1196.614914 | 0.010114  | <a href="#">ELQQAELPNR</a>   |
| 7.8   | 1196.633575 | -0.008547 | <a href="#">QASTQVPR</a>     |
| 7.1   | 1196.633545 | -0.008517 | <a href="#">ELQAAQAR</a>     |
| 6.6   | 1196.614929 | 0.010099  | <a href="#">QITTELAEHR</a>   |
| 6.0   | 1196.614944 | 0.010084  | <a href="#">EAIGPGGEVVNR</a> |
| 2.7   | 1196.637390 | -0.012362 | <a href="#">TLRQAGAPNNR</a>  |
| 1.9   | 1196.614929 | 0.010099  | <a href="#">DAVPGEAALQAR</a> |

# MASCOT SCIENCE Mascot Search Results

## Peptide View

MS/MS Fragmentation of **ELQAAQAR**

Found in **APOE\_HUMAN**, Apolipoprotein E OS=Homo sapiens GN=APOE PE=1 SV=1

Match to Query 17686: 1196.631228 from(599.322890,2+) rtinseconds(1483) index(42777)

Title: Locus:1.1.1.3229.14 File:"2013-07-02 CLN FXIII 180 min 3rd F 4.wiff"

Data file C:\Program Files (x86)\Matrix Science\Mascot Daemon\mgf\9 FXIII 180 min 3rd\mascot\_daemon\_merge.mgf

Click mouse within plot area to zoom in by factor of two about that point

Or, Plot from  to  Da

Label all possible matches  Label matches used for scoring

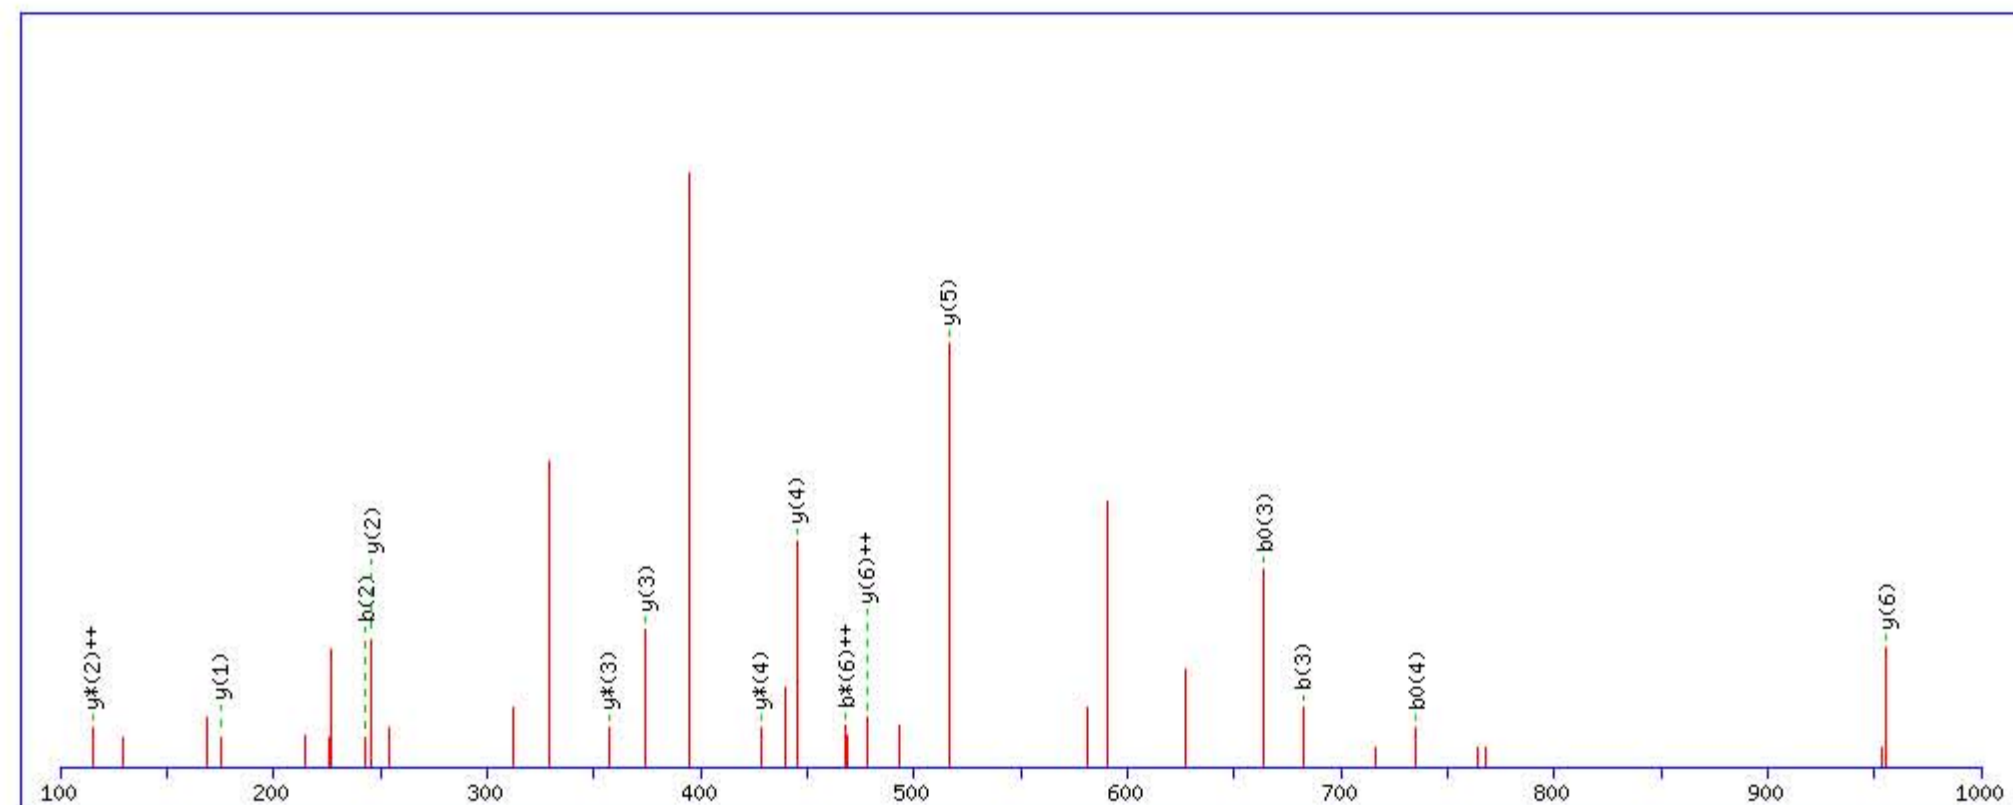

Monoisotopic mass of neutral peptide Mr(calc): 1196.633545

Fixed modifications: Carbamidomethyl (C) (apply to specified residues or termini only)

Variable modifications:

Q3 : Biotin:Thermo-21345 (Q)

Ions Score: 32 Expect: 0.012

Matches : 15/66 fragment ions using 32 most intense peaks [\(help\)](#)

| # | b                 | b <sup>++</sup> | b <sup>+</sup> | b <sup>+++</sup>  | b <sup>0</sup>    | b <sup>0++</sup> | Seq. | y                 | y <sup>++</sup>   | y <sup>+</sup>    | y <sup>+++</sup>  | # |
|---|-------------------|-----------------|----------------|-------------------|-------------------|------------------|------|-------------------|-------------------|-------------------|-------------------|---|
| 1 | 130.049869        | 65.528572       |                |                   | 112.039304        | 56.523290        | E    |                   |                   |                   |                   | 8 |
| 2 | <b>243.133933</b> | 122.070605      |                |                   | 225.123368        | 113.065322       | L    | 1068.598262       | 534.802769        | 1051.571713       | 526.289495        | 7 |
| 3 | <b>682.359259</b> | 341.683268      | 665.332710     | 333.169993        | <b>664.348694</b> | 332.677985       | Q    | <b>955.514198</b> | <b>478.260737</b> | 938.487649        | 469.747463        | 6 |
| 4 | 753.396373        | 377.201825      | 736.369824     | 368.688550        | <b>735.385808</b> | 368.196542       | A    | <b>516.288872</b> | 258.648074        | 499.262323        | 250.134800        | 5 |
| 5 | 824.433487        | 412.720382      | 807.406938     | 404.207107        | 806.422922        | 403.715099       | A    | <b>445.251758</b> | 223.129517        | <b>428.225209</b> | 214.616243        | 4 |
| 6 | 952.492065        | 476.749671      | 935.465516     | <b>468.236396</b> | 934.481500        | 467.744388       | Q    | <b>374.214644</b> | 187.610960        | <b>357.188095</b> | 179.097686        | 3 |
| 7 | 1023.529179       | 512.268227      | 1006.502630    | 503.754953        | 1005.518614       | 503.262945       | A    | <b>246.156066</b> | 123.581671        | 229.129517        | <b>115.068397</b> | 2 |
| 8 |                   |                 |                |                   |                   |                  | R    | <b>175.118952</b> | 88.063114         | 158.092403        | 79.549840         | 1 |

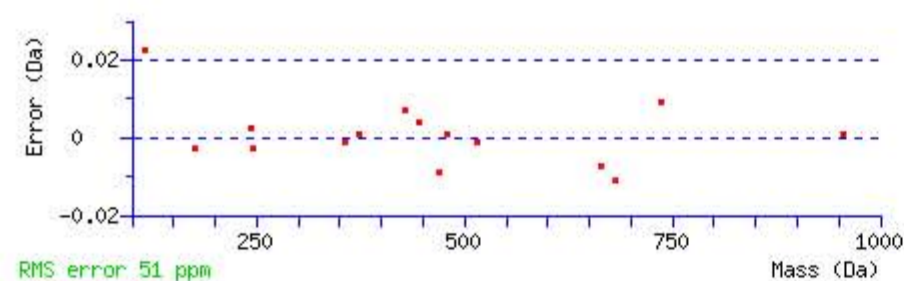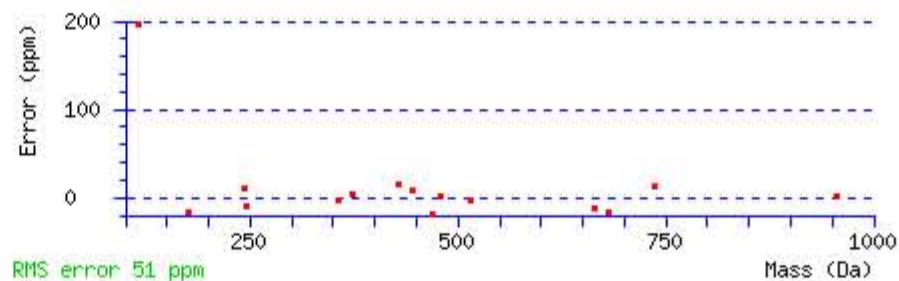

NCBI BLAST search of **ELQAAQAR**

(Parameters: blastp, nr protein database, expect=20000, no filter, PAM30)

Other BLAST [web gateways](#)

## All matches to this query

| Score | Mr(calc):   | Delta     | Sequence                    |
|-------|-------------|-----------|-----------------------------|
| 31.6  | 1196.633545 | -0.002317 | <a href="#">ELQAAQAR</a>    |
| 10.8  | 1196.644775 | -0.013547 | <a href="#">LEQANRR</a>     |
| 5.9   | 1196.641418 | -0.010190 | <a href="#">EAKKAGPGFHR</a> |
| 5.3   | 1196.633560 | -0.002332 | <a href="#">QNQDILR</a>     |
| 0.4   | 1196.633575 | -0.002347 | <a href="#">MGITISPVSHR</a> |

Mascot: <http://www.matrixscience.com/>



# **MASCOT** Mascot Search Results

## Peptide View

MS/MS Fragmentation of **LGPLVEQGR**

Found in **APOE\_HUMAN**, Apolipoprotein E OS=Homo sapiens GN=APOE PE=1 SV=1

Match to Query 19745: 1278.708008 from(640.361280,2+) rtinseconds(1992) index(31814)

Title: Locus:1.1.1.3357.11 File:"2013-07-02 CLN FXIII 180 min 3rd F 3.wiff"

Data file C:\Program Files (x86)\Matrix Science\Mascot Daemon\mgf\9 FXIII 180 min 3rd\mascot\_daemon\_merge.mgf

Click mouse within plot area to zoom in by factor of two about that point

Or, Plot from  to  Da

Label all possible matches  Label matches used for scoring

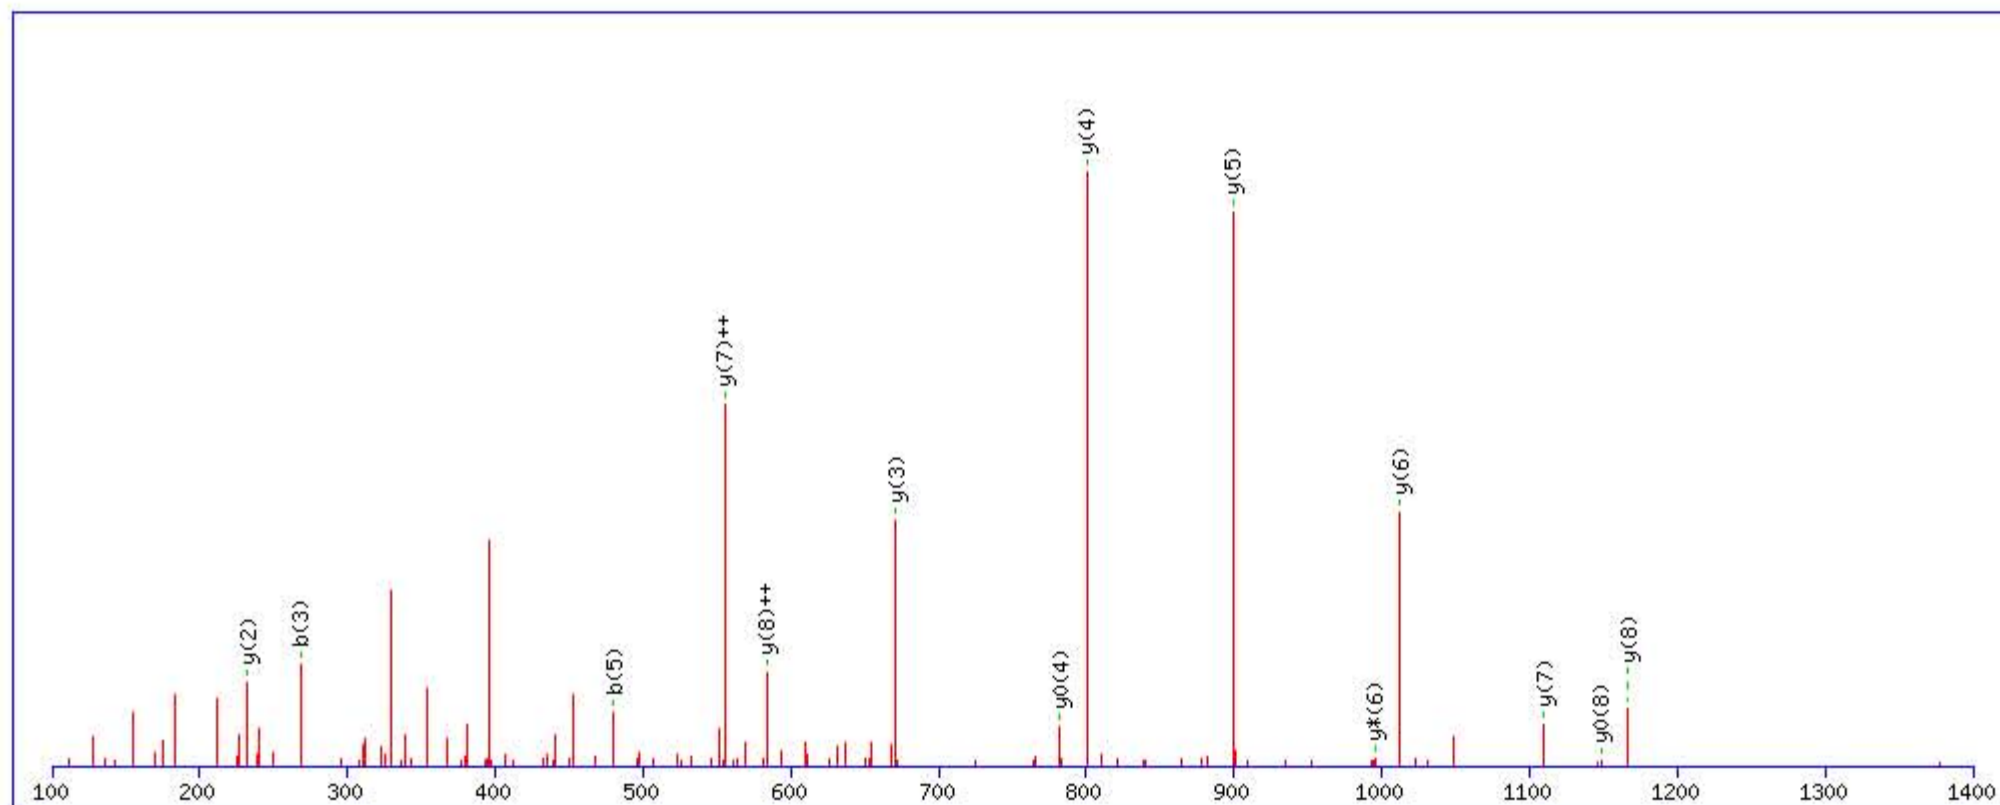

Monoisotopic mass of neutral peptide Mr(calc): 1278.711823

Fixed modifications: Carbamidomethyl (C) (apply to specified residues or termini only)

Variable modifications:

Q7 : Biotin:Thermo-21345 (Q)

Ions Score: 50 Expect: 0.00014

Matches : 14/68 fragment ions using 22 most intense peaks [\(help\)](#)

| # | b           | b <sup>++</sup> | b <sup>*</sup> | b <sup>*++</sup> | b <sup>0</sup> | b <sup>0++</sup> | Seq. | y           | y <sup>++</sup> | y <sup>*</sup> | y <sup>*++</sup> | y <sup>0</sup> | y <sup>0++</sup> | # |
|---|-------------|-----------------|----------------|------------------|----------------|------------------|------|-------------|-----------------|----------------|------------------|----------------|------------------|---|
| 1 | 114.091340  | 57.549308       |                |                  |                |                  | L    |             |                 |                |                  |                |                  | 9 |
| 2 | 171.112804  | 86.060040       |                |                  |                |                  | G    | 1166.635041 | 583.821159      | 1149.608492    | 575.307884       | 1148.624476    | 574.815876       | 8 |
| 3 | 268.165568  | 134.586422      |                |                  |                |                  | P    | 1109.613577 | 555.310426      | 1092.587028    | 546.797152       | 1091.603012    | 546.305144       | 7 |
| 4 | 381.249632  | 191.128454      |                |                  |                |                  | L    | 1012.560813 | 506.784044      | 995.534264     | 498.270770       | 994.550248     | 497.778762       | 6 |
| 5 | 480.318046  | 240.662661      |                |                  |                |                  | V    | 899.476749  | 450.242012      | 882.450200     | 441.728738       | 881.466184     | 441.236730       | 5 |
| 6 | 609.360639  | 305.183958      |                |                  | 591.350074     | 296.178675       | E    | 800.408335  | 400.707805      | 783.381786     | 392.194531       | 782.397770     | 391.702523       | 4 |
| 7 | 1048.585965 | 524.796621      | 1031.559416    | 516.283346       | 1030.575400    | 515.791338       | Q    | 671.365742  | 336.186509      | 654.339193     | 327.673234       |                |                  | 3 |
| 8 | 1105.607429 | 553.307352      | 1088.580880    | 544.794078       | 1087.596864    | 544.302070       | G    | 232.140416  | 116.573846      | 215.113867     | 108.060571       |                |                  | 2 |
| 9 |             |                 |                |                  |                |                  | R    | 175.118952  | 88.063114       | 158.092403     | 79.549839        |                |                  | 1 |

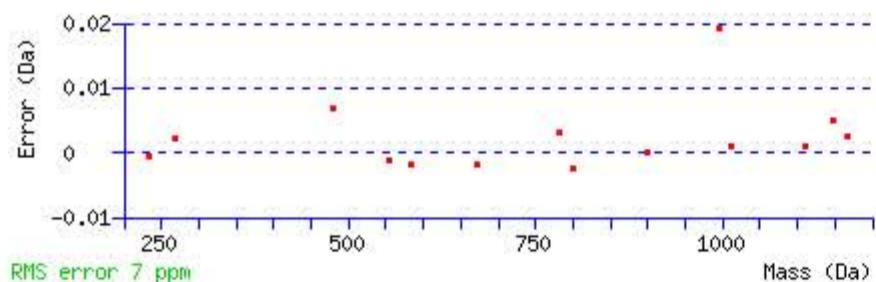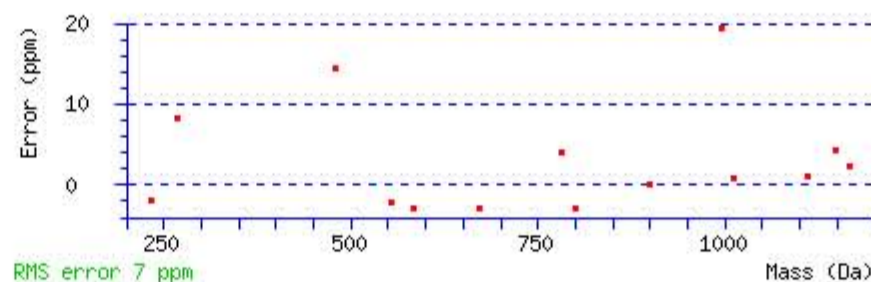

NCBI BLAST search of **LGPLVEQGR**

(Parameters: blastp, nr protein database, expect=20000, no filter, PAM30)

Other BLAST [web gateways](#)

### All matches to this query

| Score | Mr(calc):   | Delta     | Sequence                  |
|-------|-------------|-----------|---------------------------|
| 50.2  | 1278.711823 | -0.003815 | <a href="#">LGPLVEQGR</a> |

# MASCOT Search Results

## Peptide View

MS/MS Fragmentation of **LQAEAFQAR**

Found in **APOE\_HUMAN**, Apolipoprotein E OS=Homo sapiens GN=APOE PE=1 SV=1

Match to Query 21214: 1343.701428 from(672.857990,2+) rtinseconds(1838) index(30812)

Title: Locus:1.1.1.3303.6 File:"2013-07-02 CLN FXIII 180 min 3rd F 3.wiff"

Data file C:\Program Files (x86)\Matrix Science\Mascot Daemon\mgf9 FXIII 180 min 3rd\mascot\_daemon\_merge.mgf

Click mouse within plot area to zoom in by factor of two about that point

Or, Plot from  to  Da

Label all possible matches  Label matches used for scoring

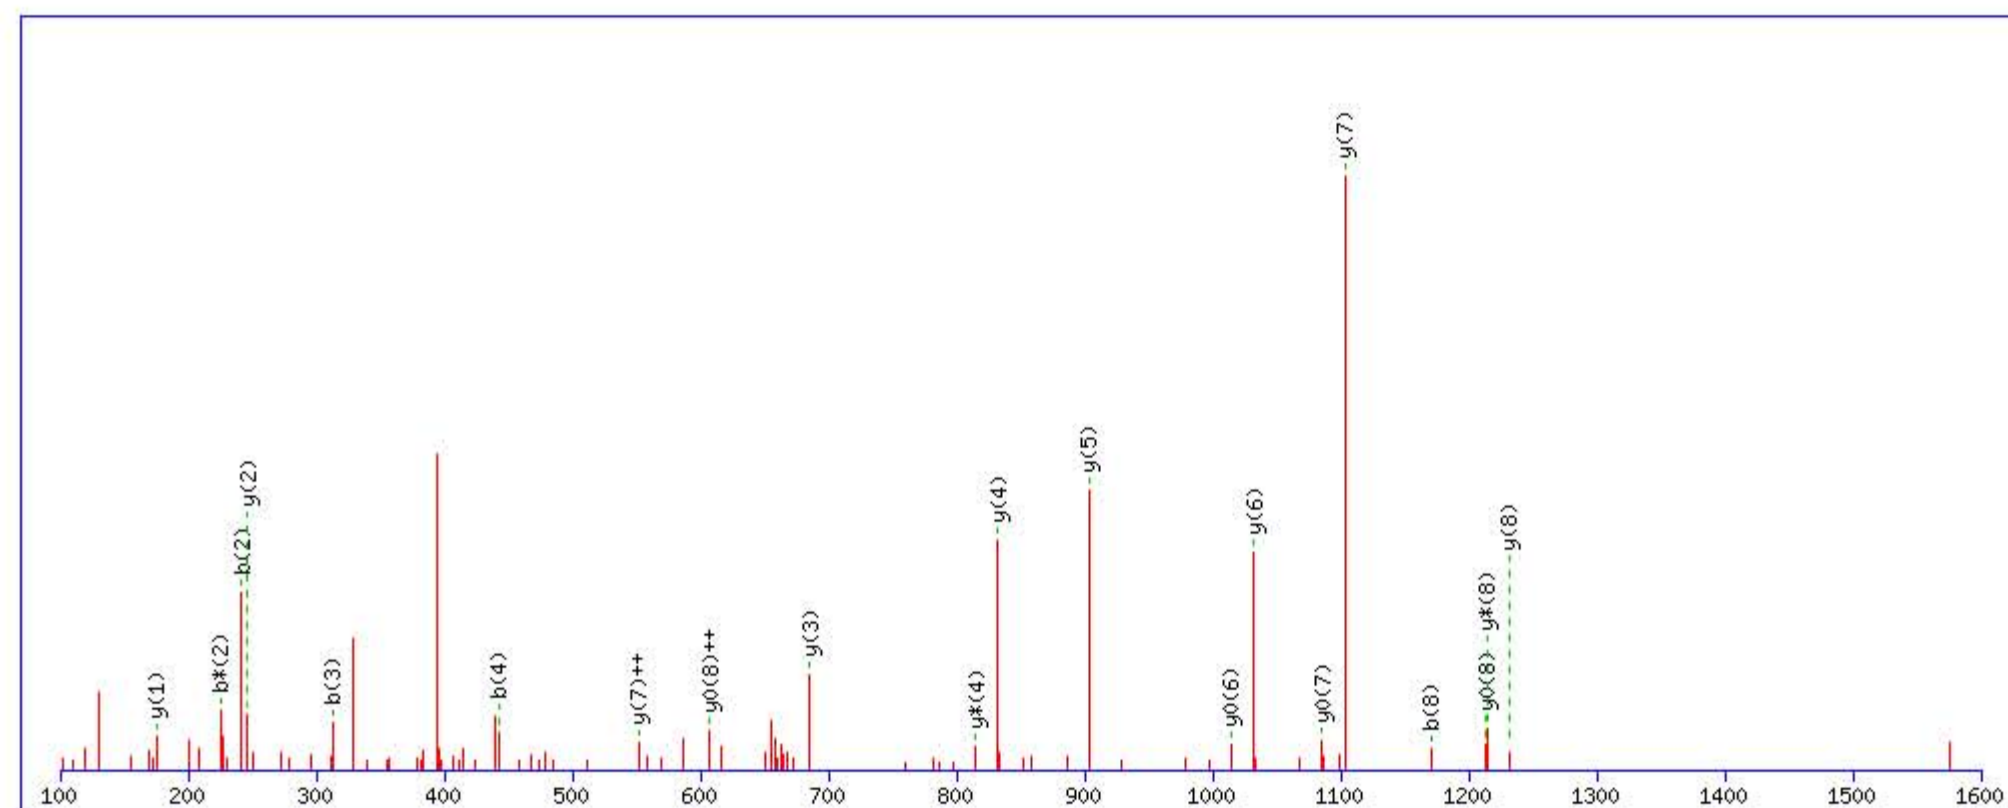

Monoisotopic mass of neutral peptide Mr(calc): 1343.701965

Fixed modifications: Carbamidomethyl (C) (apply to specified residues or termini only)

Variable modifications:

Q7 : Biotin:Thermo-21345 (Q)

Ions Score: 49 Expect: 0.00023

Matches : 20/78 fragment ions using 36 most intense peaks [\(help\)](#)

| # | b                  | b <sup>++</sup> | b <sup>*</sup>    | b <sup>*++</sup> | b <sup>0</sup> | b <sup>0++</sup> | Seq. | y                  | y <sup>++</sup>   | y <sup>*</sup>     | y <sup>*++</sup> | y <sup>0</sup>     | y <sup>0++</sup>  | # |
|---|--------------------|-----------------|-------------------|------------------|----------------|------------------|------|--------------------|-------------------|--------------------|------------------|--------------------|-------------------|---|
| 1 | 114.091340         | 57.549308       |                   |                  |                |                  | L    |                    |                   |                    |                  |                    |                   | 9 |
| 2 | <b>242.149918</b>  | 121.578597      | <b>225.123369</b> | 113.065323       |                |                  | Q    | <b>1231.625205</b> | 616.316241        | <b>1214.598656</b> | 607.802966       | <b>1213.614640</b> | <b>607.310958</b> | 8 |
| 3 | <b>313.187032</b>  | 157.097154      | 296.160483        | 148.583879       |                |                  | A    | <b>1103.566627</b> | <b>552.286951</b> | 1086.540078        | 543.773677       | <b>1085.556062</b> | 543.281669        | 7 |
| 4 | <b>442.229625</b>  | 221.618450      | 425.203076        | 213.105176       | 424.219060     | 212.613168       | E    | <b>1032.529513</b> | 516.768395        | 1015.502964        | 508.255120       | <b>1014.518948</b> | 507.763112        | 6 |
| 5 | 513.266739         | 257.137008      | 496.240190        | 248.623733       | 495.256174     | 248.131725       | A    | <b>903.486920</b>  | 452.247098        | 886.460371         | 443.733823       |                    |                   | 5 |
| 6 | 660.335153         | 330.671215      | 643.308604        | 322.157940       | 642.324588     | 321.665932       | F    | <b>832.449806</b>  | 416.728541        | <b>815.423257</b>  | 408.215266       |                    |                   | 4 |
| 7 | 1099.560479        | 550.283878      | 1082.533930       | 541.770603       | 1081.549914    | 541.278595       | Q    | <b>685.381392</b>  | 343.194334        | 668.354843         | 334.681060       |                    |                   | 3 |
| 8 | <b>1170.597593</b> | 585.802435      | 1153.571044       | 577.289160       | 1152.587028    | 576.797152       | A    | <b>246.156066</b>  | 123.581671        | 229.129517         | 115.068396       |                    |                   | 2 |
| 9 |                    |                 |                   |                  |                |                  | R    | <b>175.118952</b>  | 88.063114         | 158.092403         | 79.549839        |                    |                   | 1 |

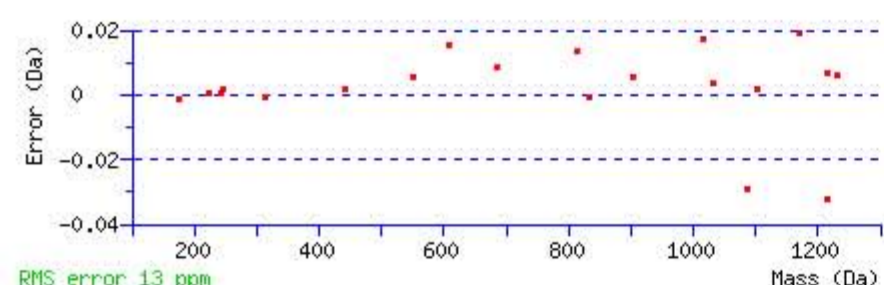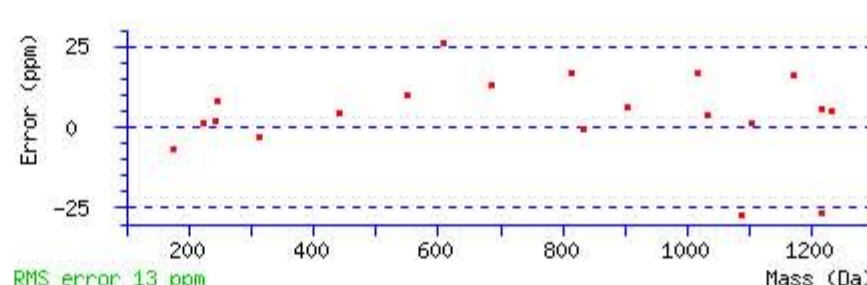

NCBI BLAST search of **LQAEAFQAR**

(Parameters: blastp, nr protein database, expect=20000, no filter, PAM30)

Other BLAST [web gateways](#)

## All matches to this query

| Score | Mr(calc):   | Delta     | Sequence                          |
|-------|-------------|-----------|-----------------------------------|
| 49.4  | 1343.701965 | -0.000537 | <a href="#">LQAEAFQAR</a>         |
| 9.9   | 1343.694107 | 0.007321  | <a href="#">IQAMSEVQK</a>         |
| 7.8   | 1343.715683 | -0.014255 | <a href="#">LKDSEAE LQRR</a>      |
| 7.6   | 1343.704453 | -0.003025 | <a href="#">IQEKKDEDIAR</a>       |
| 7.0   | 1343.683350 | 0.018078  | <a href="#">GSPAAP EGA L GYVR</a> |
| 5.6   | 1343.716583 | -0.015155 | <a href="#">LQQVMSRR</a>          |
| 5.0   | 1343.704453 | -0.003025 | <a href="#">LQAANAEDIKSGK</a>     |
| 5.0   | 1343.704453 | -0.003025 | <a href="#">IKGEELSEANVR</a>      |
| 1.6   | 1343.694565 | 0.006863  | <a href="#">QLAAFAPREEGR</a>      |
| 1.5   | 1343.693207 | 0.008221  | <a href="#">LAKDLEELER</a>        |

# MASCOT SEARCH RESULTS

## Peptide View

MS/MS Fragmentation of **LEEQAQQIR**

Found in **APOE\_HUMAN**, Apolipoprotein E OS=Homo sapiens GN=APOE PE=1 SV=1

Match to Query 25099: 1424.732028 from(713.373290,2+) rtinseconds(1633) index(2797)

Title: Locus:1.1.1.3088.15 File:"2013-07-02 CLN FXIII 180 min 3rd F 1.wiff"

Data file C:\Program Files (x86)\Matrix Science\Mascot Daemon\mgf9 FXIII 180 min 3rd\mascot\_daemon\_merge.mgf

Click mouse within plot area to zoom in by factor of two about that point

Or, Plot from  to  Da

Label all possible matches  Label matches used for scoring

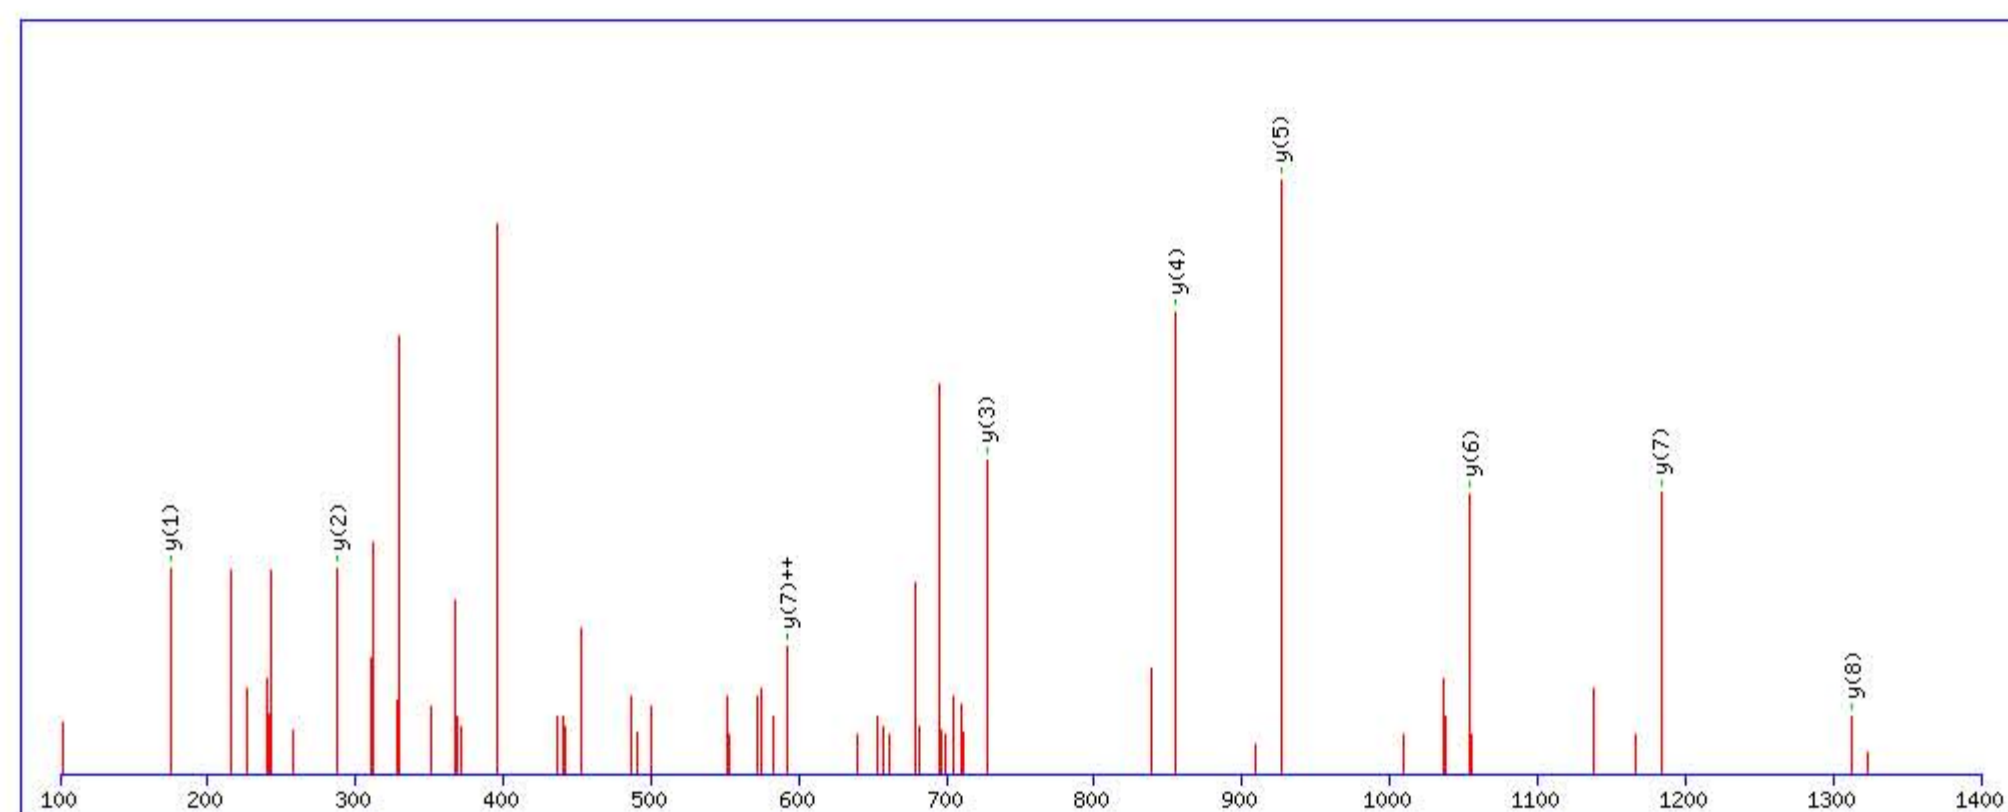

Monoisotopic mass of neutral peptide Mr(calc): 1424.744553

Fixed modifications: Carbamidomethyl (C) (apply to specified residues or termini only)

Variable modifications:

Q7 : Biotin:Thermo-21345 (Q)

Ions Score: 69 Expect: 8.8e-006

Matches : 9/76 fragment ions using 12 most intense peaks [\(help\)](#)

| # | b           | b <sup>++</sup> | b <sup>*</sup> | b <sup>*++</sup> | b <sup>0</sup> | b <sup>0++</sup> | Seq. | y                  | y <sup>++</sup>   | y <sup>*</sup> | y <sup>*++</sup> | y <sup>0</sup> | y <sup>0++</sup> | # |
|---|-------------|-----------------|----------------|------------------|----------------|------------------|------|--------------------|-------------------|----------------|------------------|----------------|------------------|---|
| 1 | 114.091340  | 57.549308       |                |                  |                |                  | L    |                    |                   |                |                  |                |                  | 9 |
| 2 | 243.133933  | 122.070605      |                |                  | 225.123368     | 113.065322       | E    | <b>1312.667798</b> | 656.837537        | 1295.641249    | 648.324263       | 1294.657233    | 647.832255       | 8 |
| 3 | 372.176526  | 186.591901      |                |                  | 354.165961     | 177.586619       | E    | <b>1183.625205</b> | <b>592.316241</b> | 1166.598656    | 583.802966       | 1165.614640    | 583.310958       | 7 |
| 4 | 500.235104  | 250.621190      | 483.208555     | 242.107916       | 482.224539     | 241.615908       | Q    | <b>1054.582612</b> | 527.794944        | 1037.556063    | 519.281670       |                |                  | 6 |
| 5 | 571.272218  | 286.139747      | 554.245669     | 277.626473       | 553.261653     | 277.134465       | A    | <b>926.524034</b>  | 463.765655        | 909.497485     | 455.252381       |                |                  | 5 |
| 6 | 699.330796  | 350.169036      | 682.304247     | 341.655762       | 681.320231     | 341.163754       | Q    | <b>855.486920</b>  | 428.247098        | 838.460371     | 419.733824       |                |                  | 4 |
| 7 | 1138.556122 | 569.781699      | 1121.529573    | 561.268425       | 1120.545557    | 560.776417       | Q    | <b>727.428342</b>  | 364.217809        | 710.401793     | 355.704535       |                |                  | 3 |
| 8 | 1251.640186 | 626.323731      | 1234.613637    | 617.810457       | 1233.629621    | 617.318449       | I    | <b>288.203016</b>  | 144.605146        | 271.176467     | 136.091871       |                |                  | 2 |
| 9 |             |                 |                |                  |                |                  | R    | <b>175.118952</b>  | 88.063114         | 158.092403     | 79.549839        |                |                  | 1 |

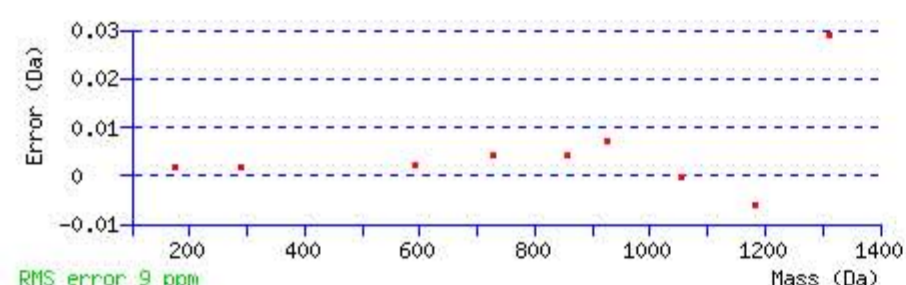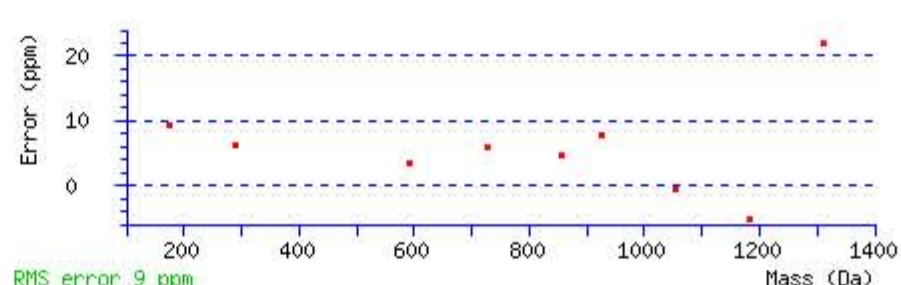

NCBI BLAST search of [LEEQAQQIR](#)

(Parameters: blastp, nr protein database, expect=20000, no filter, PAM30)

Other BLAST [web gateways](#)

## All matches to this query

| Score | Mr(calc):   | Delta     | Sequence                     |
|-------|-------------|-----------|------------------------------|
| 69.3  | 1424.744553 | -0.012525 | <a href="#">LEEQAQQIR</a>    |
| 52.9  | 1424.744553 | -0.012525 | <a href="#">LEEQAQQIR</a>    |
| 24.2  | 1424.744553 | -0.012525 | <a href="#">LEEQAQQIR</a>    |
| 16.0  | 1424.733322 | -0.001294 | <a href="#">LEQETEPLR</a>    |
| 15.2  | 1424.723465 | 0.008563  | <a href="#">TWTVLPPMSTHR</a> |
| 10.7  | 1424.745438 | -0.013410 | <a href="#">QMQQIR</a>       |
| 7.8   | 1424.734680 | -0.002652 | <a href="#">WVLTAAHCLAQR</a> |
| 4.7   | 1424.744583 | -0.012555 | <a href="#">QLSGDQPTIR</a>   |
| 4.0   | 1424.726807 | 0.005221  | <a href="#">QMNLQQQPK</a>    |
| 2.9   | 1424.744583 | -0.012555 | <a href="#">QLSGDQPTIR</a>   |

# MASCOT Search Results

## Peptide View

MS/MS Fragmentation of **QQTEWQSGQR**

Found in **APOE\_HUMAN**, Apolipoprotein E OS=Homo sapiens GN=APOE PE=1 SV=1

Match to Query 28648: 1557.731868 from(779.873210,2+) rtinseconds(1612) index(29499)

Title: Locus:1.1.1.3224.26 File:"2013-07-02 CLN FXIII 180 min 3rd F 3.wiff"

Data file C:\Program Files (x86)\Matrix Science\Mascot Daemon\mgf9 FXIII 180 min 3rd\mascot\_daemon\_merge.mgf

Click mouse within plot area to zoom in by factor of two about that point

Or, Plot from  to  Da

Label all possible matches  Label matches used for scoring

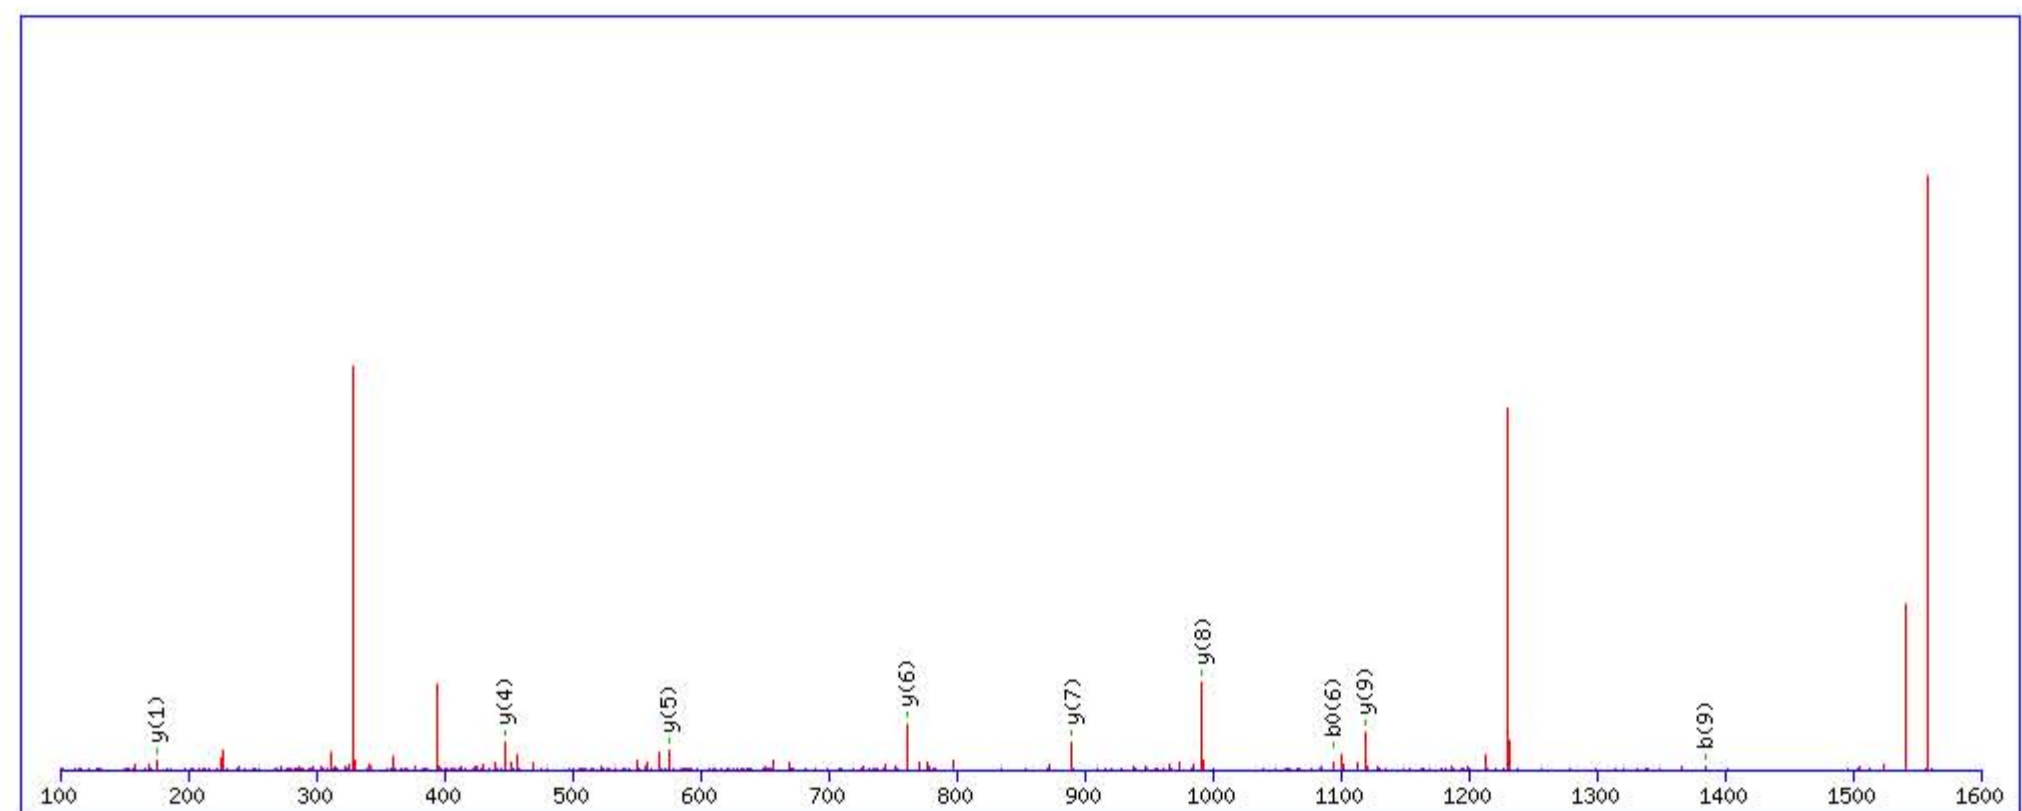

Monoisotopic mass of neutral peptide Mr(calc): 1557.735809

Fixed modifications: Carbamidomethyl (C) (apply to specified residues or termini only)

Variable modifications:

Q1 : Biotin:Thermo-21345 (Q)

Ions Score: 41 Expect: 0.0011

Matches : 9/98 fragment ions using 15 most intense peaks [\(help\)](#)

| #  | b           | b <sup>++</sup> | b <sup>+</sup> | b <sup>+++</sup> | b <sup>0</sup> | b <sup>0++</sup> | Seq. | y           | y <sup>++</sup> | y <sup>+</sup> | y <sup>+++</sup> | y <sup>0</sup> | y <sup>0++</sup> | #  |
|----|-------------|-----------------|----------------|------------------|----------------|------------------|------|-------------|-----------------|----------------|------------------|----------------|------------------|----|
| 1  | 440.232602  | 220.619939      | 423.206053     | 212.106664       |                |                  | Q    |             |                 |                |                  |                |                  | 10 |
| 2  | 568.291180  | 284.649228      | 551.264631     | 276.135954       |                |                  | Q    | 1119.517763 | 560.262520      | 1102.491214    | 551.749245       | 1101.507198    | 551.257237       | 9  |
| 3  | 669.338859  | 335.173068      | 652.312310     | 326.659793       | 651.328294     | 326.167785       | T    | 991.459185  | 496.233231      | 974.432636     | 487.719956       | 973.448620     | 487.227948       | 8  |
| 4  | 798.381452  | 399.694364      | 781.354903     | 391.181090       | 780.370887     | 390.689082       | E    | 890.411506  | 445.709391      | 873.384957     | 437.196117       | 872.400941     | 436.704109       | 7  |
| 5  | 984.460765  | 492.734021      | 967.434216     | 484.220746       | 966.450200     | 483.728738       | W    | 761.368913  | 381.188095      | 744.342364     | 372.674820       | 743.358348     | 372.182812       | 6  |
| 6  | 1112.519343 | 556.763310      | 1095.492794    | 548.250035       | 1094.508778    | 547.758027       | Q    | 575.289600  | 288.148438      | 558.263051     | 279.635164       | 557.279035     | 279.143156       | 5  |
| 7  | 1199.551371 | 600.279324      | 1182.524822    | 591.766049       | 1181.540806    | 591.274041       | S    | 447.231022  | 224.119149      | 430.204473     | 215.605875       | 429.220457     | 215.113867       | 4  |
| 8  | 1256.572835 | 628.790056      | 1239.546286    | 620.276781       | 1238.562270    | 619.784773       | G    | 360.198994  | 180.603135      | 343.172445     | 172.089860       |                |                  | 3  |
| 9  | 1384.631413 | 692.819345      | 1367.604864    | 684.306070       | 1366.620848    | 683.814062       | Q    | 303.177530  | 152.092403      | 286.150981     | 143.579129       |                |                  | 2  |
| 10 |             |                 |                |                  |                |                  | R    | 175.118952  | 88.063114       | 158.092403     | 79.549839        |                |                  | 1  |

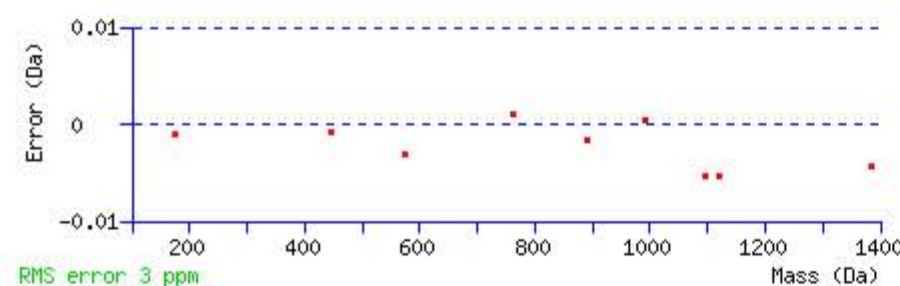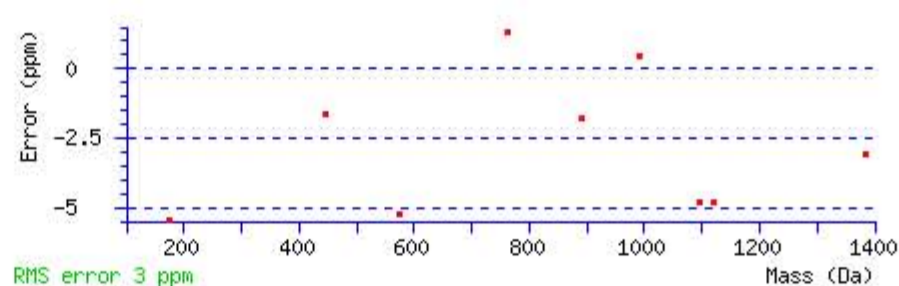

NCBI BLAST search of **QQTEWQSGQR**

(Parameters: blastp, nr protein database, expect=20000, no filter, PAM30)

Other BLAST [web gateways](#)

## All matches to this query

| Score | Mr(calc):   | Delta     | Sequence                        |
|-------|-------------|-----------|---------------------------------|
| 41.1  | 1557.735809 | -0.003941 | <a href="#">QQTEWQSGQR</a>      |
| 28.7  | 1557.735809 | -0.003941 | <a href="#">QQTEWQSGQR</a>      |
| 9.5   | 1557.747040 | -0.015172 | <a href="#">AFSHCSSLTKHQR</a>   |
| 9.0   | 1557.720566 | 0.011302  | <a href="#">QEAAATGVDTICTHR</a> |
| 7.0   | 1557.742340 | -0.010472 | <a href="#">TQSFEIPQPDSGPR</a>  |
| 6.4   | 1557.710663 | 0.021205  | <a href="#">ATQRPPYCDGTHR</a>   |
| 6.1   | 1557.746567 | -0.014699 | <a href="#">QMSSPQSR</a>        |
| 5.5   | 1557.735779 | -0.003911 | <a href="#">APPELPERNCGYR</a>   |
| 4.2   | 1557.745697 | -0.013829 | <a href="#">GSSLFMDTEKSGKR</a>  |
| 4.0   | 1557.720551 | 0.011317  | <a href="#">LSQVSPEDDRPCR</a>   |

# MASCOT Search Results

## Peptide View

MS/MS Fragmentation of **AATVGSLAGQPLQER**

Found in **APOE\_HUMAN**, Apolipoprotein E OS=Homo sapiens GN=APOE PE=1 SV=1

Match to Query 35862: 1807.972188 from(904.993370,2+) rtinseconds(2015) index(5022)

Title: Locus:1.1.1.3221.25 File:"2013-07-02 CLN FXIII 180 min 3rd F 1.wiff"

Data file C:\Program Files (x86)\Matrix Science\Mascot Daemon\mgf9 FXIII 180 min 3rd\mascot\_daemon\_merge.mgf

Click mouse within plot area to zoom in by factor of two about that point

Or, Plot from  to  Da

Label all possible matches  Label matches used for scoring

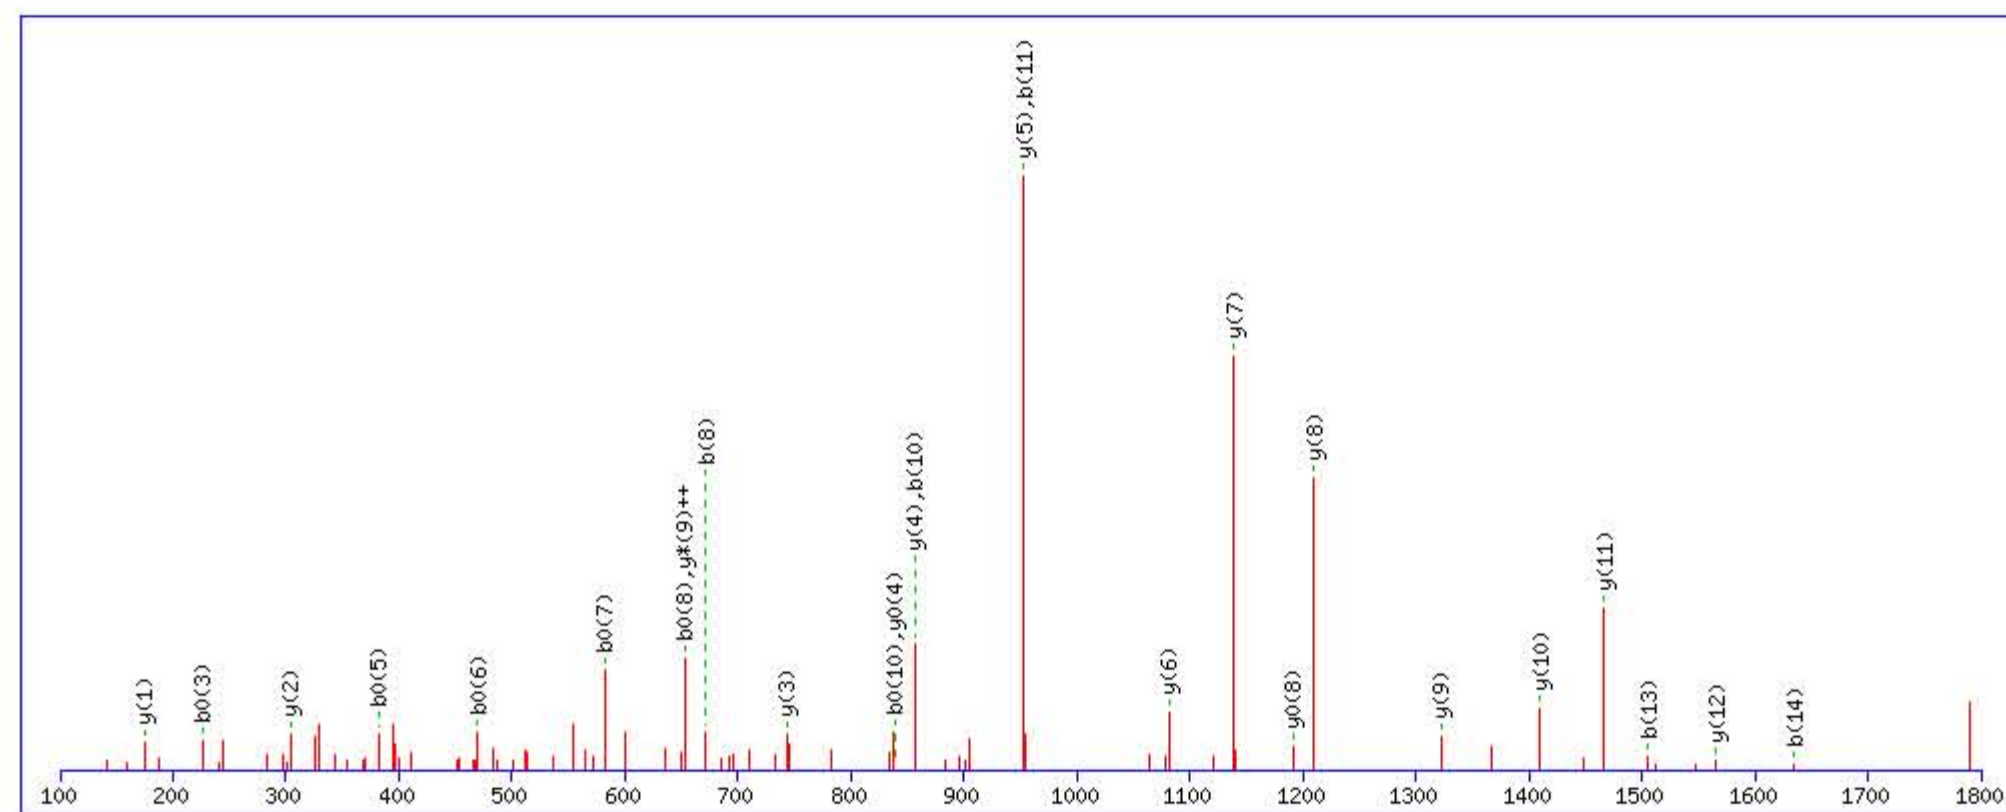

Monoisotopic mass of neutral peptide Mr(calc): 1807.961441

Fixed modifications: Carbamidomethyl (C) (apply to specified residues or termini only)

Variable modifications:

Q13 : Biotin:Thermo-21345 (Q)

Ions Score: 107 Expect: 4.9e-010

Matches : 26/144 fragment ions using 30 most intense peaks [\(help\)](#)

| #  | b           | b <sup>++</sup> | b <sup>+</sup> | b <sup>+++</sup> | b <sup>0</sup> | b <sup>0++</sup> | Seq. | y           | y <sup>++</sup> | y <sup>+</sup> | y <sup>+++</sup> | y <sup>0</sup> | y <sup>0++</sup> | #  |
|----|-------------|-----------------|----------------|------------------|----------------|------------------|------|-------------|-----------------|----------------|------------------|----------------|------------------|----|
| 1  | 72.044390   | 36.525833       |                |                  |                |                  | A    |             |                 |                |                  |                |                  | 15 |
| 2  | 143.081504  | 72.044390       |                |                  |                |                  | A    | 1737.931618 | 869.469447      | 1720.905069    | 860.956173       | 1719.921053    | 860.464165       | 14 |
| 3  | 244.129183  | 122.568230      |                |                  | 226.118618     | 113.562947       | T    | 1666.894504 | 833.950890      | 1649.867955    | 825.437616       | 1648.883939    | 824.945608       | 13 |
| 4  | 343.197597  | 172.102437      |                |                  | 325.187032     | 163.097154       | V    | 1565.846825 | 783.427051      | 1548.820276    | 774.913776       | 1547.836260    | 774.421768       | 12 |
| 5  | 400.219061  | 200.613169      |                |                  | 382.208496     | 191.607886       | G    | 1466.778411 | 733.892844      | 1449.751862    | 725.379569       | 1448.767846    | 724.887561       | 11 |
| 6  | 487.251089  | 244.129183      |                |                  | 469.240524     | 235.123900       | S    | 1409.756947 | 705.382112      | 1392.730398    | 696.868837       | 1391.746382    | 696.376829       | 10 |
| 7  | 600.335153  | 300.671215      |                |                  | 582.324588     | 291.665932       | L    | 1322.724919 | 661.866098      | 1305.698370    | 653.352823       | 1304.714354    | 652.860815       | 9  |
| 8  | 671.372267  | 336.189772      |                |                  | 653.361702     | 327.184489       | A    | 1209.640855 | 605.324066      | 1192.614306    | 596.810791       | 1191.630290    | 596.318783       | 8  |
| 9  | 728.393731  | 364.700504      |                |                  | 710.383166     | 355.695221       | G    | 1138.603741 | 569.805509      | 1121.577192    | 561.292234       | 1120.593176    | 560.800226       | 7  |
| 10 | 856.452309  | 428.729793      | 839.425760     | 420.216518       | 838.441744     | 419.724510       | Q    | 1081.582277 | 541.294777      | 1064.555728    | 532.781502       | 1063.571712    | 532.289494       | 6  |
| 11 | 953.505073  | 477.256175      | 936.478524     | 468.742900       | 935.494508     | 468.250892       | P    | 953.523699  | 477.265488      | 936.497150     | 468.752213       | 935.513134     | 468.260205       | 5  |
| 12 | 1066.589137 | 533.798207      | 1049.562588    | 525.284932       | 1048.578572    | 524.792924       | L    | 856.470935  | 428.739106      | 839.444386     | 420.225831       | 838.460370     | 419.733823       | 4  |
| 13 | 1505.814463 | 753.410870      | 1488.787914    | 744.897595       | 1487.803898    | 744.405587       | Q    | 743.386871  | 372.197074      | 726.360322     | 363.683799       | 725.376306     | 363.191791       | 3  |
| 14 | 1634.857056 | 817.932166      | 1617.830507    | 809.418892       | 1616.846491    | 808.926884       | E    | 304.161545  | 152.584411      | 287.134996     | 144.071136       | 286.150980     | 143.579128       | 2  |
| 15 |             |                 |                |                  |                |                  | R    | 175.118952  | 88.063114       | 158.092403     | 79.549839        |                |                  | 1  |

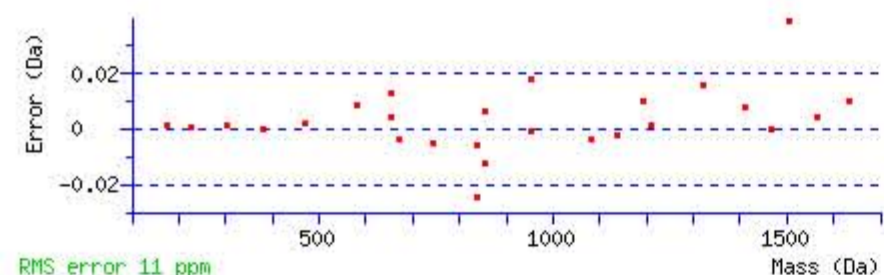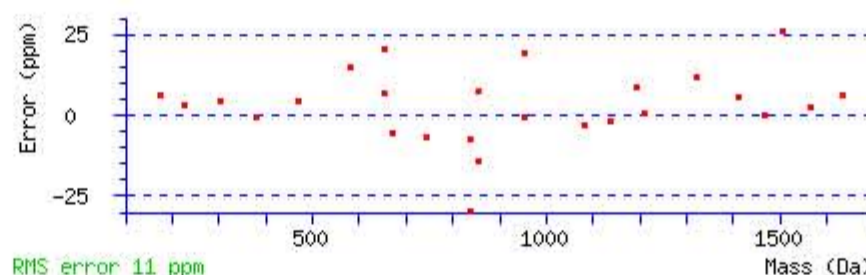

NCBI BLAST search of **AATVGSLAGQPLQER**

(Parameters: blastp, nr protein database, expect=20000, no filter, PAM30)

Other BLAST [web gateways](#)

All matches to this query

| Score | Mr(calc):   | Delta     | Sequence                          |
|-------|-------------|-----------|-----------------------------------|
| 106.6 | 1807.961441 | 0.010747  | <a href="#">AATVGSLAGQPLQER</a>   |
| 59.4  | 1807.961441 | 0.010747  | <a href="#">AATVGSLAGQPLQER</a>   |
| 14.4  | 1807.947510 | 0.024678  | <a href="#">VGLAQIAAMDISRGNHR</a> |
| 7.2   | 1807.961426 | 0.010762  | <a href="#">DELEQVLAATRPR</a>     |
| 3.3   | 1807.986542 | -0.014354 | <a href="#">QAALLEEAALLAER</a>    |
| 1.8   | 1807.983887 | -0.011699 | <a href="#">KPVTAQERQRER</a>      |
| 1.2   | 1807.954208 | 0.017980  | <a href="#">INMLYNELFQSLVPK</a>   |
| 0.9   | 1807.947464 | 0.024724  | <a href="#">ENRLAERMAILHAER</a>   |
| 0.5   | 1807.980042 | -0.007854 | <a href="#">TAAIKAMLQLHER</a>     |

# MASCOT SCIENCE Mascot Search Results

## Peptide View

MS/MS Fragmentation of **SWFEPLVEDMQR**

Found in **APOE\_HUMAN**, Apolipoprotein E OS=Homo sapiens GN=APOE PE=1 SV=1

Match to Query 36556: 1846.872628 from(924.443590,2+) rtinseconds(2848) index(37023)

Title: Locus:1.1.1.3653.5 File:"2013-07-02 CLN FXIII 180 min 3rd F 3.wiff"

Data file C:\Program Files (x86)\Matrix Science\Mascot Daemon\mgf9 FXIII 180 min 3rd\mascot\_daemon\_merge.mgf

Click mouse within plot area to zoom in by factor of two about that point

Or, Plot from  to  Da

Label all possible matches  Label matches used for scoring

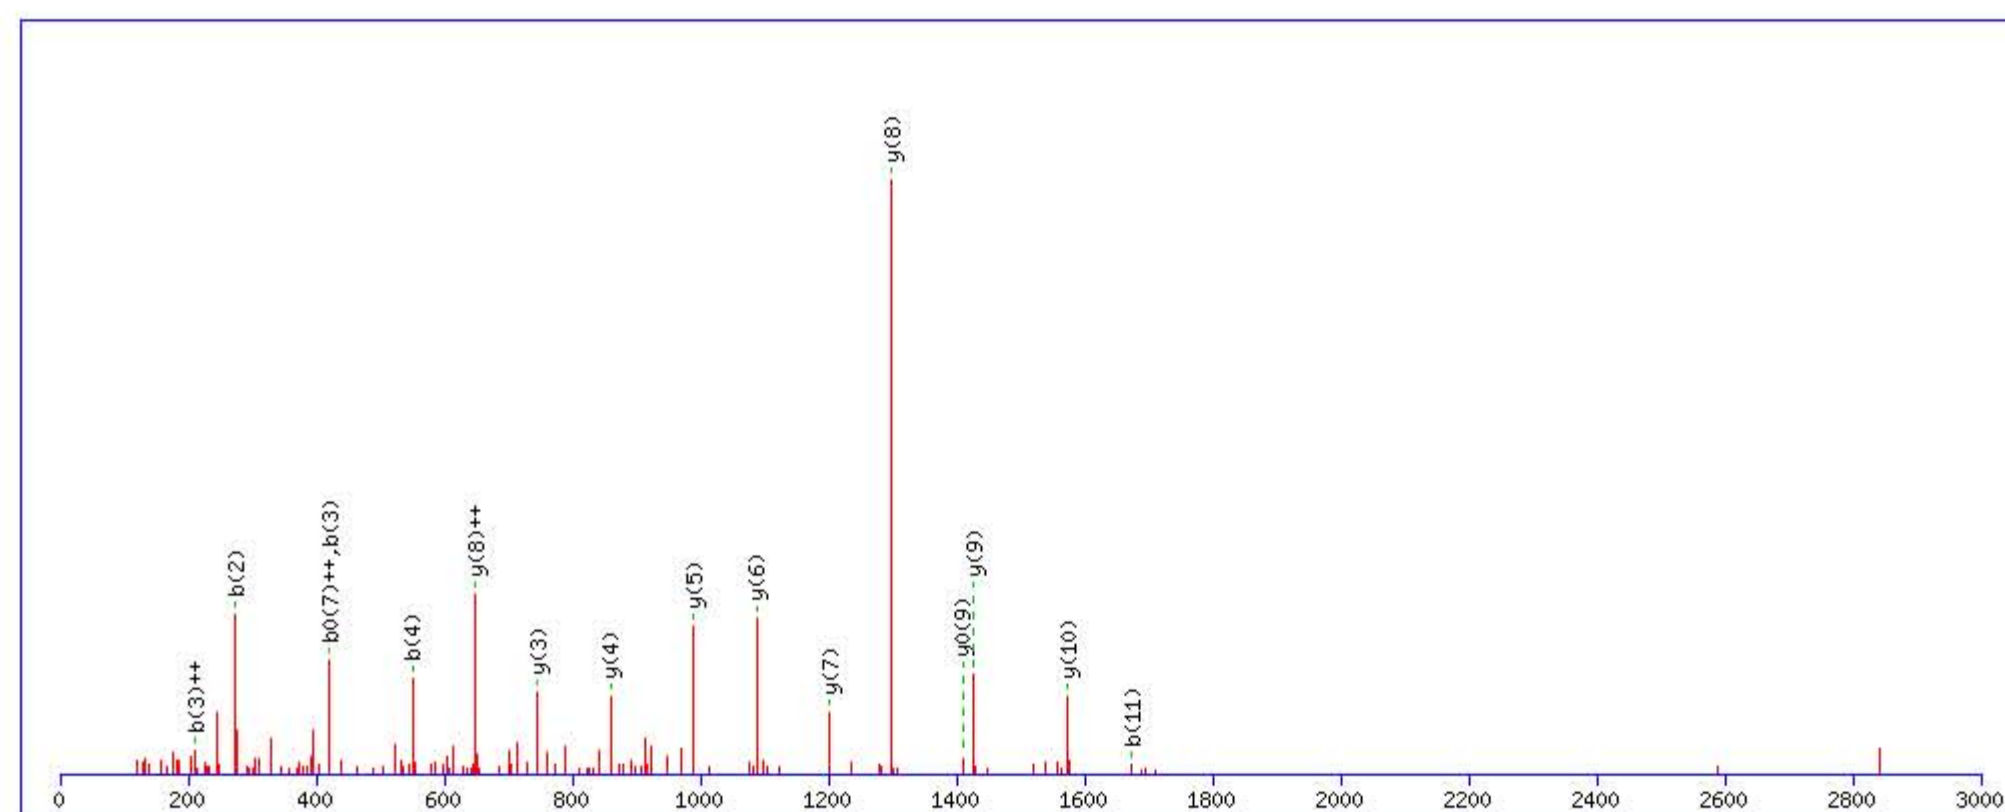

Monoisotopic mass of neutral peptide Mr(calc): 1846.874603

Fixed modifications: Carbamidomethyl (C) (apply to specified residues or termini only)

Variable modifications:

Q11 : Biotin:Thermo-21345 (Q)

Ions Score: 67 Expect: 3.7e-006

Matches : 16/106 fragment ions using 16 most intense peaks [\(help\)](#)

| #  | b                  | b <sup>++</sup>   | b <sup>*</sup> | b <sup>*++</sup> | b <sup>0</sup> | b <sup>0++</sup>  | Seq. | y                  | y <sup>++</sup>   | y <sup>*</sup> | y <sup>*++</sup> | y <sup>0</sup>     | y <sup>0++</sup> | #  |
|----|--------------------|-------------------|----------------|------------------|----------------|-------------------|------|--------------------|-------------------|----------------|------------------|--------------------|------------------|----|
| 1  | 88.039304          | 44.523290         |                |                  | 70.028739      | 35.518008         | S    |                    |                   |                |                  |                    |                  | 12 |
| 2  | <b>274.118617</b>  | 137.562947        |                |                  | 256.108052     | 128.557664        | W    | 1760.849861        | 880.928568        | 1743.823312    | 872.415294       | 1742.839296        | 871.923286       | 11 |
| 3  | <b>421.187031</b>  | <b>211.097153</b> |                |                  | 403.176466     | 202.091871        | F    | <b>1574.770548</b> | 787.888912        | 1557.743999    | 779.375638       | 1556.759983        | 778.883629       | 10 |
| 4  | <b>550.229624</b>  | 275.618450        |                |                  | 532.219059     | 266.613168        | E    | <b>1427.702134</b> | 714.354705        | 1410.675585    | 705.841431       | <b>1409.691569</b> | 705.349422       | 9  |
| 5  | 647.282388         | 324.144832        |                |                  | 629.271823     | 315.139550        | P    | <b>1298.659541</b> | <b>649.833409</b> | 1281.632992    | 641.320134       | 1280.648976        | 640.828126       | 8  |
| 6  | 760.366452         | 380.686864        |                |                  | 742.355887     | 371.681582        | L    | <b>1201.606777</b> | 601.307027        | 1184.580228    | 592.793752       | 1183.596212        | 592.301744       | 7  |
| 7  | 859.434866         | 430.221071        |                |                  | 841.424301     | <b>421.215789</b> | V    | <b>1088.522713</b> | 544.764995        | 1071.496164    | 536.251720       | 1070.512148        | 535.759712       | 6  |
| 8  | 988.477459         | 494.742368        |                |                  | 970.466894     | 485.737085        | E    | <b>989.454299</b>  | 495.230788        | 972.427750     | 486.717513       | 971.443734         | 486.225505       | 5  |
| 9  | 1103.504402        | 552.255839        |                |                  | 1085.493837    | 543.250557        | D    | <b>860.411706</b>  | 430.709491        | 843.385157     | 422.196216       | 842.401141         | 421.704208       | 4  |
| 10 | 1234.544887        | 617.776082        |                |                  | 1216.534322    | 608.770799        | M    | <b>745.384763</b>  | 373.196020        | 728.358214     | 364.682745       |                    |                  | 3  |
| 11 | <b>1673.770213</b> | 837.388745        | 1656.743664    | 828.875470       | 1655.759648    | 828.383462        | Q    | 614.344278         | 307.675777        | 597.317729     | 299.162503       |                    |                  | 2  |
| 12 |                    |                   |                |                  |                |                   | R    | 175.118952         | 88.063114         | 158.092403     | 79.549839        |                    |                  | 1  |

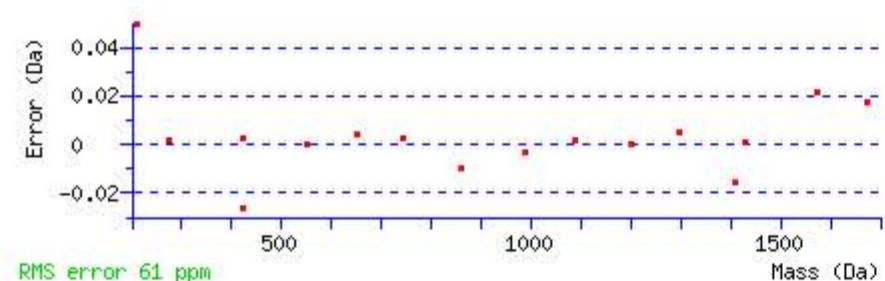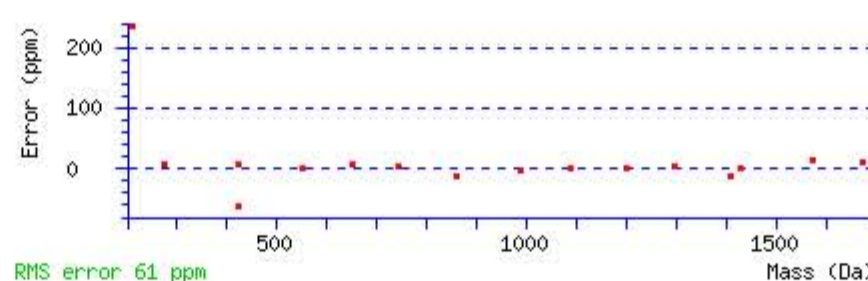

NCBI BLAST search of **SWFEPLVEDMQR**

(Parameters: blastp, nr protein database, expect=20000, no filter, PAM30)

Other BLAST [web gateways](#)

## All matches to this query

| Score | Mr(calc):   | Delta     | Sequence                        |
|-------|-------------|-----------|---------------------------------|
| 66.6  | 1846.874603 | -0.001975 | <a href="#">SWFEPLVEDMQR</a>    |
| 17.1  | 1846.866562 | 0.006066  | <a href="#">LCMAQPRTVQDVEER</a> |
| 15.5  | 1846.849426 | 0.023202  | <a href="#">SFWENNCKMIYLAR</a>  |
| 2.8   | 1846.895706 | -0.023078 | <a href="#">CFELQALLEEER</a>    |
| 1.7   | 1846.870560 | 0.002068  | <a href="#">IHIGEKPYECKECKG</a> |
| 0.7   | 1846.874603 | -0.001975 | <a href="#">MWTYMKSAEPSVFVR</a> |
| 0.7   | 1846.874603 | -0.001975 | <a href="#">MWTYMKSAEPSVFVR</a> |



# MASCOT Search Results

## Peptide View

MS/MS Fragmentation of **SGVQQLIQYYQDQK**

Found in **APOF\_HUMAN**, Apolipoprotein F OS=Homo sapiens GN=APOF PE=1 SV=2

Match to Query 40026: 2008.009948 from(1005.012250,2+) rtinseconds(2507) index(34645)

Title: Locus:1.1.1.3536.24 File:"2013-07-02 CLN FXIII 180 min 3rd F 3.wiff"

Data file C:\Program Files (x86)\Matrix Science\Mascot Daemon\mgf\9 FXIII 180 min 3rd\mascot\_daemon\_merge.mgf

Click mouse within plot area to zoom in by factor of two about that point

Or, Plot from  to  Da

Label all possible matches  Label matches used for scoring

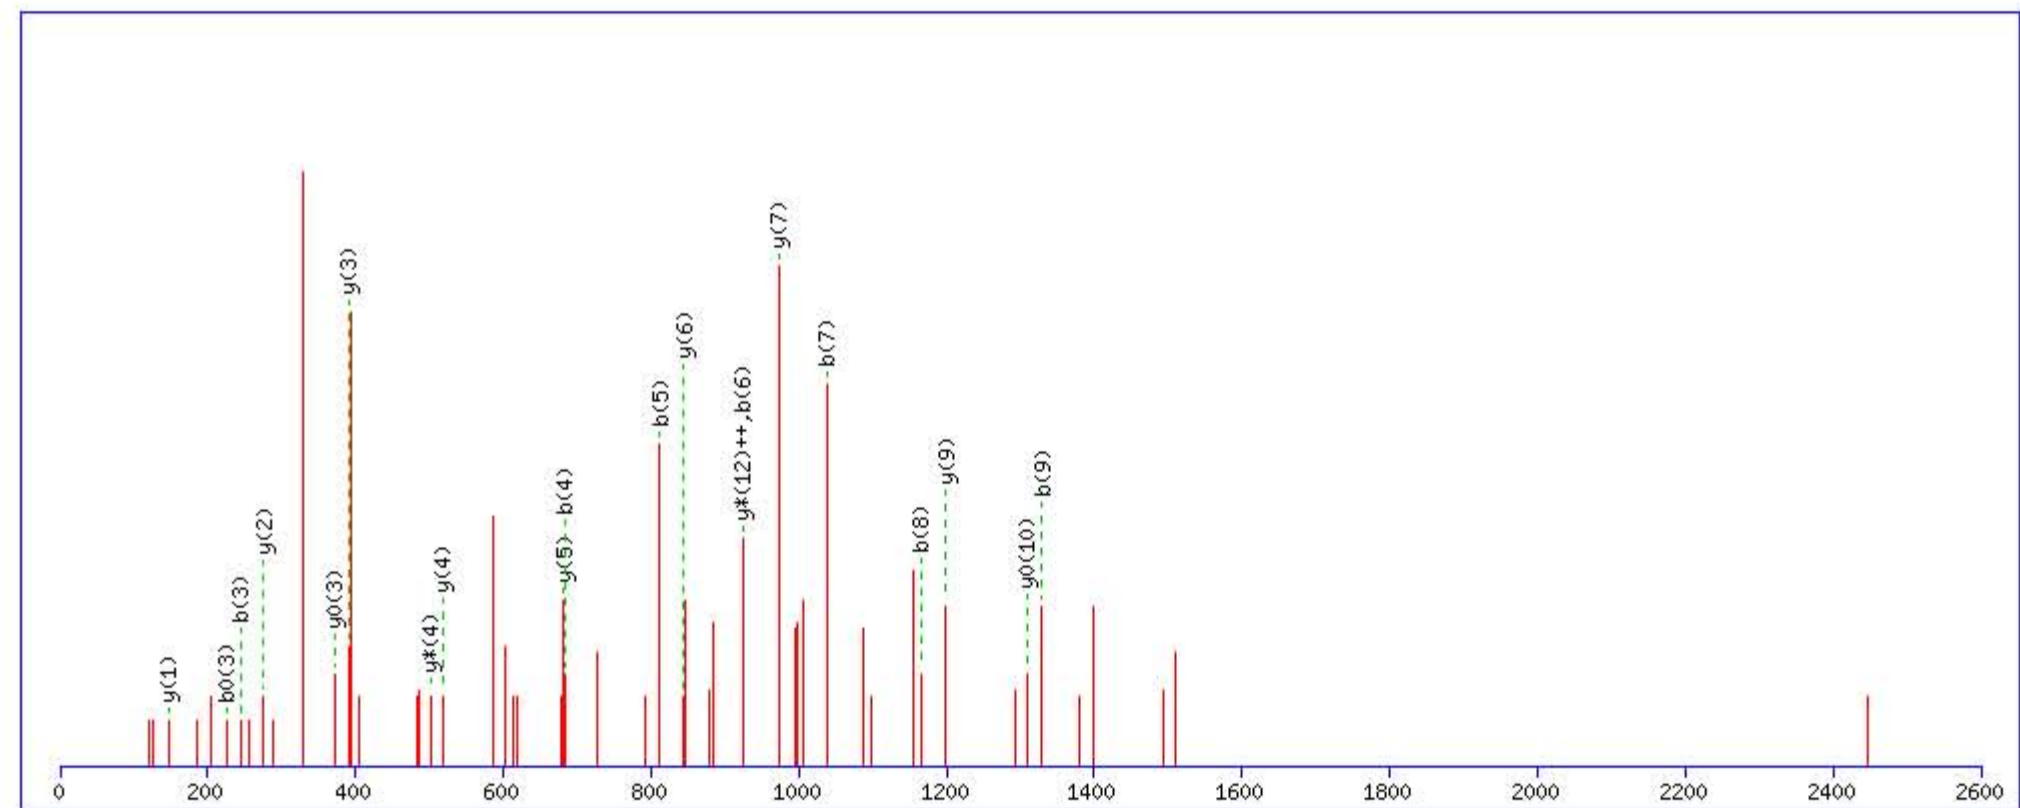

Monoisotopic mass of neutral peptide Mr(calc): 2008.008789

Fixed modifications: Carbamidomethyl (C) (apply to specified residues or termini only)

Variable modifications:

Q4 : Biotin:Thermo-21345 (Q)

Ions Score: 33 Expect: 0.0019

Matches : 20/146 fragment ions using 50 most intense peaks [\(help\)](#)

| #  | b                  | b <sup>++</sup> | b <sup>*</sup> | b <sup>+++</sup> | b <sup>0</sup>    | b <sup>0++</sup> | Seq. | y                  | y <sup>++</sup> | y <sup>*</sup>    | y <sup>+++</sup>  | y <sup>0</sup>     | y <sup>0++</sup> | #  |
|----|--------------------|-----------------|----------------|------------------|-------------------|------------------|------|--------------------|-----------------|-------------------|-------------------|--------------------|------------------|----|
| 1  | 88.039304          | 44.523290       |                |                  | 70.028739         | 35.518008        | S    |                    |                 |                   |                   |                    |                  | 14 |
| 2  | 145.060768         | 73.034022       |                |                  | 127.050203        | 64.028740        | G    | 1921.984049        | 961.495663      | 1904.957500       | 952.982388        | 1903.973484        | 952.490380       | 13 |
| 3  | <b>244.129182</b>  | 122.568229      |                |                  | <b>226.118617</b> | 113.562947       | V    | 1864.962585        | 932.984931      | 1847.936036       | <b>924.471656</b> | 1846.952020        | 923.979648       | 12 |
| 4  | <b>683.354508</b>  | 342.180892      | 666.327959     | 333.667618       | 665.343943        | 333.175610       | Q    | 1765.894171        | 883.450724      | 1748.867622       | 874.937449        | 1747.883606        | 874.445441       | 11 |
| 5  | <b>811.413086</b>  | 406.210181      | 794.386537     | 397.696907       | 793.402521        | 397.204899       | Q    | 1326.668845        | 663.838061      | 1309.642296       | 655.324786        | <b>1308.658280</b> | 654.832778       | 10 |
| 6  | <b>924.497150</b>  | 462.752213      | 907.470601     | 454.238939       | 906.486585        | 453.746931       | L    | <b>1198.610267</b> | 599.808772      | 1181.583718       | 591.295497        | 1180.599702        | 590.803489       | 9  |
| 7  | <b>1037.581214</b> | 519.294245      | 1020.554665    | 510.780971       | 1019.570649       | 510.288963       | I    | 1085.526203        | 543.266740      | 1068.499654       | 534.753465        | 1067.515638        | 534.261457       | 8  |
| 8  | <b>1165.639792</b> | 583.323534      | 1148.613243    | 574.810260       | 1147.629227       | 574.318252       | Q    | <b>972.442139</b>  | 486.724708      | 955.415590        | 478.211433        | 954.431574         | 477.719425       | 7  |
| 9  | <b>1328.703121</b> | 664.855199      | 1311.676572    | 656.341924       | 1310.692556       | 655.849916       | Y    | <b>844.383561</b>  | 422.695419      | 827.357012        | 414.182144        | 826.372996         | 413.690136       | 6  |
| 10 | 1491.766450        | 746.386863      | 1474.739901    | 737.873589       | 1473.755885       | 737.381581       | Y    | <b>681.320232</b>  | 341.163754      | 664.293683        | 332.650480        | 663.309667         | 332.158472       | 5  |
| 11 | 1619.825028        | 810.416152      | 1602.798479    | 801.902878       | 1601.814463       | 801.410870       | Q    | <b>518.256903</b>  | 259.632090      | <b>501.230354</b> | 251.118815        | 500.246338         | 250.626807       | 4  |
| 12 | 1734.851971        | 867.929624      | 1717.825422    | 859.416349       | 1716.841406       | 858.924341       | D    | <b>390.198325</b>  | 195.602800      | 373.171776        | 187.089526        | <b>372.187760</b>  | 186.597518       | 3  |
| 13 | 1862.910549        | 931.958913      | 1845.884000    | 923.445638       | 1844.899984       | 922.953630       | Q    | <b>275.171382</b>  | 138.089329      | 258.144833        | 129.576054        |                    |                  | 2  |
| 14 |                    |                 |                |                  |                   |                  | K    | <b>147.112804</b>  | 74.060040       | 130.086255        | 65.546765         |                    |                  | 1  |

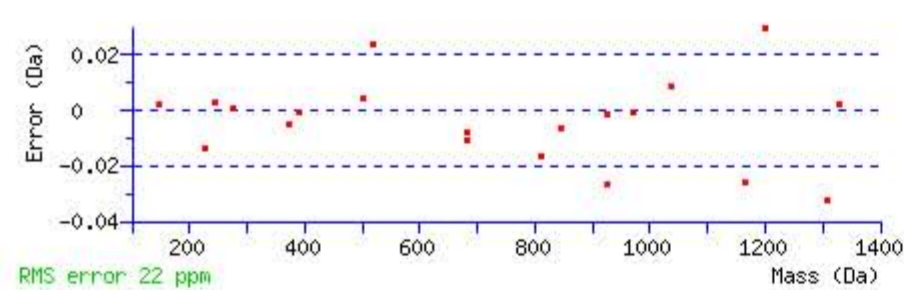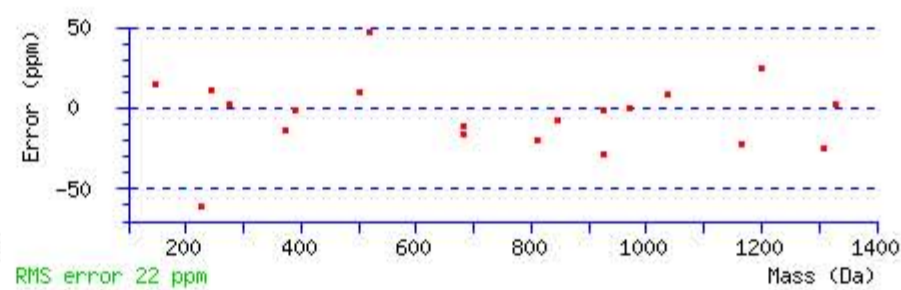

NCBI BLAST search of [SGVQQLIQYYQDQK](#)

(Parameters: blastp, nr protein database, expect=20000, no filter, PAM30)

Other BLAST [web gateways](#)

All matches to this query

| Score | Mr(calc):   | Delta    | Sequence                        |
|-------|-------------|----------|---------------------------------|
| 33.2  | 2008.008789 | 0.001159 | <a href="#">SGVQQLIQYYQDQK</a>  |
| 30.4  | 2008.008789 | 0.001159 | <a href="#">SGVQQLIQYYQDQK</a>  |
| 14.5  | 2008.008789 | 0.001159 | <a href="#">SGVQQLIQYYQDQK</a>  |
| 4.6   | 2008.008789 | 0.001159 | <a href="#">SGVQQLIQYYQDQK</a>  |
| 4.1   | 2008.005630 | 0.004318 | <a href="#">ITQRMVCAGYKEGGK</a> |



# MASCOT SEARCH RESULTS

## Peptide View

MS/MS Fragmentation of **VAQELEEK**

Found in **APOLI\_HUMAN**, Apolipoprotein L1 OS=Homo sapiens GN=APOL1 PE=1 SV=5

Match to Query 19148: 1255.643468 from(628.829010,2+) rtinseconds(1609) index(43556)

Title: Locus:1.1.1.3273.9 File:"2013-07-02 CLN FXIII 180 min 3rd F 4.wiff"

Data file C:\Program Files (x86)\Matrix Science\Mascot Daemon\mgf9 FXIII 180 min 3rd\mascot\_daemon\_merge.mgf

Click mouse within plot area to zoom in by factor of two about that point

Or, Plot from  to  Da

Label all possible matches  Label matches used for scoring

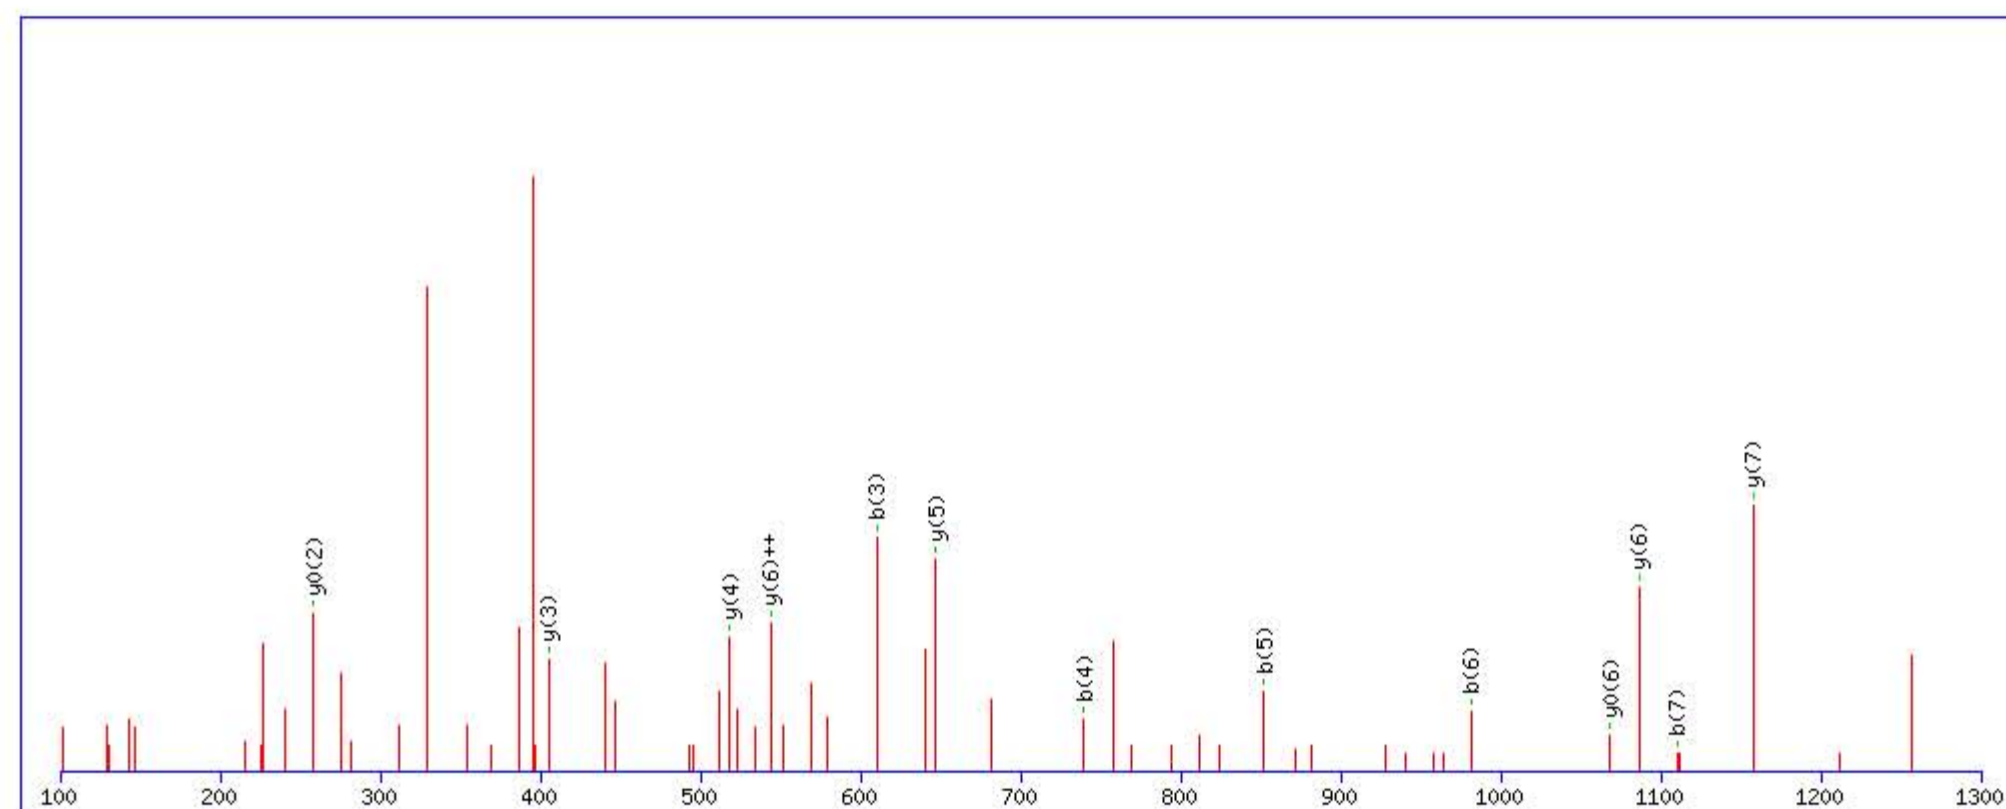

Monoisotopic mass of neutral peptide Mr(calc): 1255.648193

Fixed modifications: Carbamidomethyl (C) (apply to specified residues or termini only)

Variable modifications:

Q3 : Biotin:Thermo-21345 (Q)

Ions Score: 31 Expect: 0.018

Matches : 13/72 fragment ions using 23 most intense peaks [\(help\)](#)

| # | b                  | b <sup>++</sup> | b <sup>*</sup> | b <sup>*++</sup> | b <sup>0</sup> | b <sup>0++</sup> | Seq. | y                  | y <sup>++</sup>   | y <sup>*</sup> | y <sup>*++</sup> | y <sup>0</sup>     | y <sup>0++</sup> | # |
|---|--------------------|-----------------|----------------|------------------|----------------|------------------|------|--------------------|-------------------|----------------|------------------|--------------------|------------------|---|
| 1 | 100.075690         | 50.541483       |                |                  |                |                  | V    |                    |                   |                |                  |                    |                  | 8 |
| 2 | 171.112804         | 86.060040       |                |                  |                |                  | A    | <b>1157.587087</b> | 579.297182        | 1140.560538    | 570.783907       | 1139.576522        | 570.291899       | 7 |
| 3 | <b>610.338130</b>  | 305.672703      | 593.311581     | 297.159429       |                |                  | Q    | <b>1086.549973</b> | <b>543.778625</b> | 1069.523424    | 535.265350       | <b>1068.539408</b> | 534.773342       | 6 |
| 4 | <b>739.380723</b>  | 370.194000      | 722.354174     | 361.680725       | 721.370158     | 361.188717       | E    | <b>647.324647</b>  | 324.165962        | 630.298098     | 315.652687       | 629.314082         | 315.160679       | 5 |
| 5 | <b>852.464787</b>  | 426.736032      | 835.438238     | 418.222757       | 834.454222     | 417.730749       | L    | <b>518.282054</b>  | 259.644665        | 501.255505     | 251.131391       | 500.271489         | 250.639383       | 4 |
| 6 | <b>981.507380</b>  | 491.257328      | 964.480831     | 482.744054       | 963.496815     | 482.252046       | E    | <b>405.197990</b>  | 203.102633        | 388.171441     | 194.589359       | 387.187425         | 194.097351       | 3 |
| 7 | <b>1110.549973</b> | 555.778625      | 1093.523424    | 547.265350       | 1092.539408    | 546.773342       | E    | 276.155397         | 138.581336        | 259.128848     | 130.068062       | <b>258.144832</b>  | 129.576054       | 2 |
| 8 |                    |                 |                |                  |                |                  | K    | 147.112804         | 74.060040         | 130.086255     | 65.546765        |                    |                  | 1 |

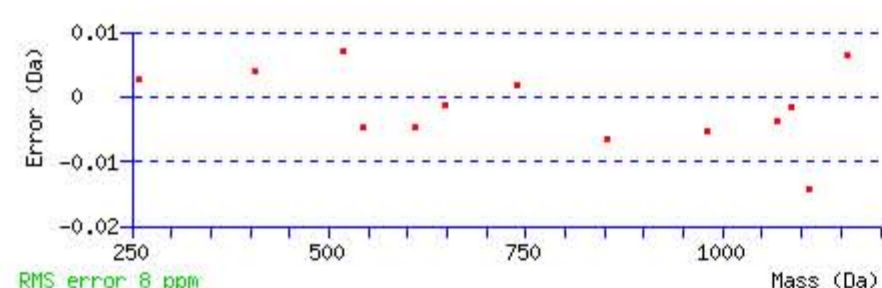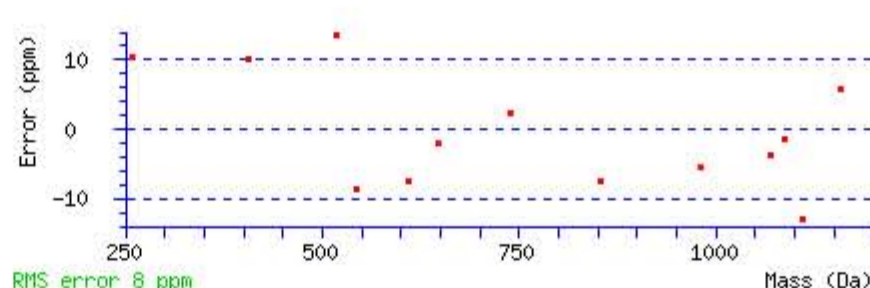

NCBI BLAST search of **VAQELEEK**

(Parameters: blastp, nr protein database, expect=20000, no filter, PAM30)

Other BLAST [web gateways](#)

All matches to this query

| Score | Mr(calc):   | Delta     | Sequence                    |
|-------|-------------|-----------|-----------------------------|
| 30.9  | 1255.648193 | -0.004725 | <a href="#">VAQELEEK</a>    |
| 15.3  | 1255.656067 | -0.012599 | <a href="#">ALPIQFSHEK</a>  |
| 14.4  | 1255.645508 | -0.002040 | <a href="#">TRMIEANIHR</a>  |
| 10.9  | 1255.659424 | -0.015956 | <a href="#">QAEKNVEK</a>    |
| 10.5  | 1255.659439 | -0.015971 | <a href="#">VALEQTER</a>    |
| 9.2   | 1255.640793 | 0.002675  | <a href="#">DTHKKLEEEK</a>  |
| 4.6   | 1255.634262 | 0.009206  | <a href="#">ADMKHLREEK</a>  |
| 4.4   | 1255.659439 | -0.015971 | <a href="#">LLIENGVSMHK</a> |
| 3.7   | 1255.659439 | -0.015971 | <a href="#">GLQGEKGEK</a>   |
| 3.2   | 1255.629547 | 0.013921  | <a href="#">EKLESAEPPEK</a> |

# MASCOT Search Results

## Peptide View

MS/MS Fragmentation of **VTEPISAESGEQVER**

Found in **APOLI\_HUMAN**, Apolipoprotein L1 OS=Homo sapiens GN=APOL1 PE=1 SV=5

Match to Query 38179: 1940.944722 from(647.988850,3+) rtinseconds(1751) index(30277)

Title: Locus:1.1.1.3273.12 File:"2013-07-02 CLN FXIII 180 min 3rd F 3.wiff"

Data file C:\Program Files (x86)\Matrix Science\Mascot Daemon\mgf9 FXIII 180 min 3rd\mascot\_daemon\_merge.mgf

Click mouse within plot area to zoom in by factor of two about that point

Or, Plot from  to  Da

Label all possible matches  Label matches used for scoring

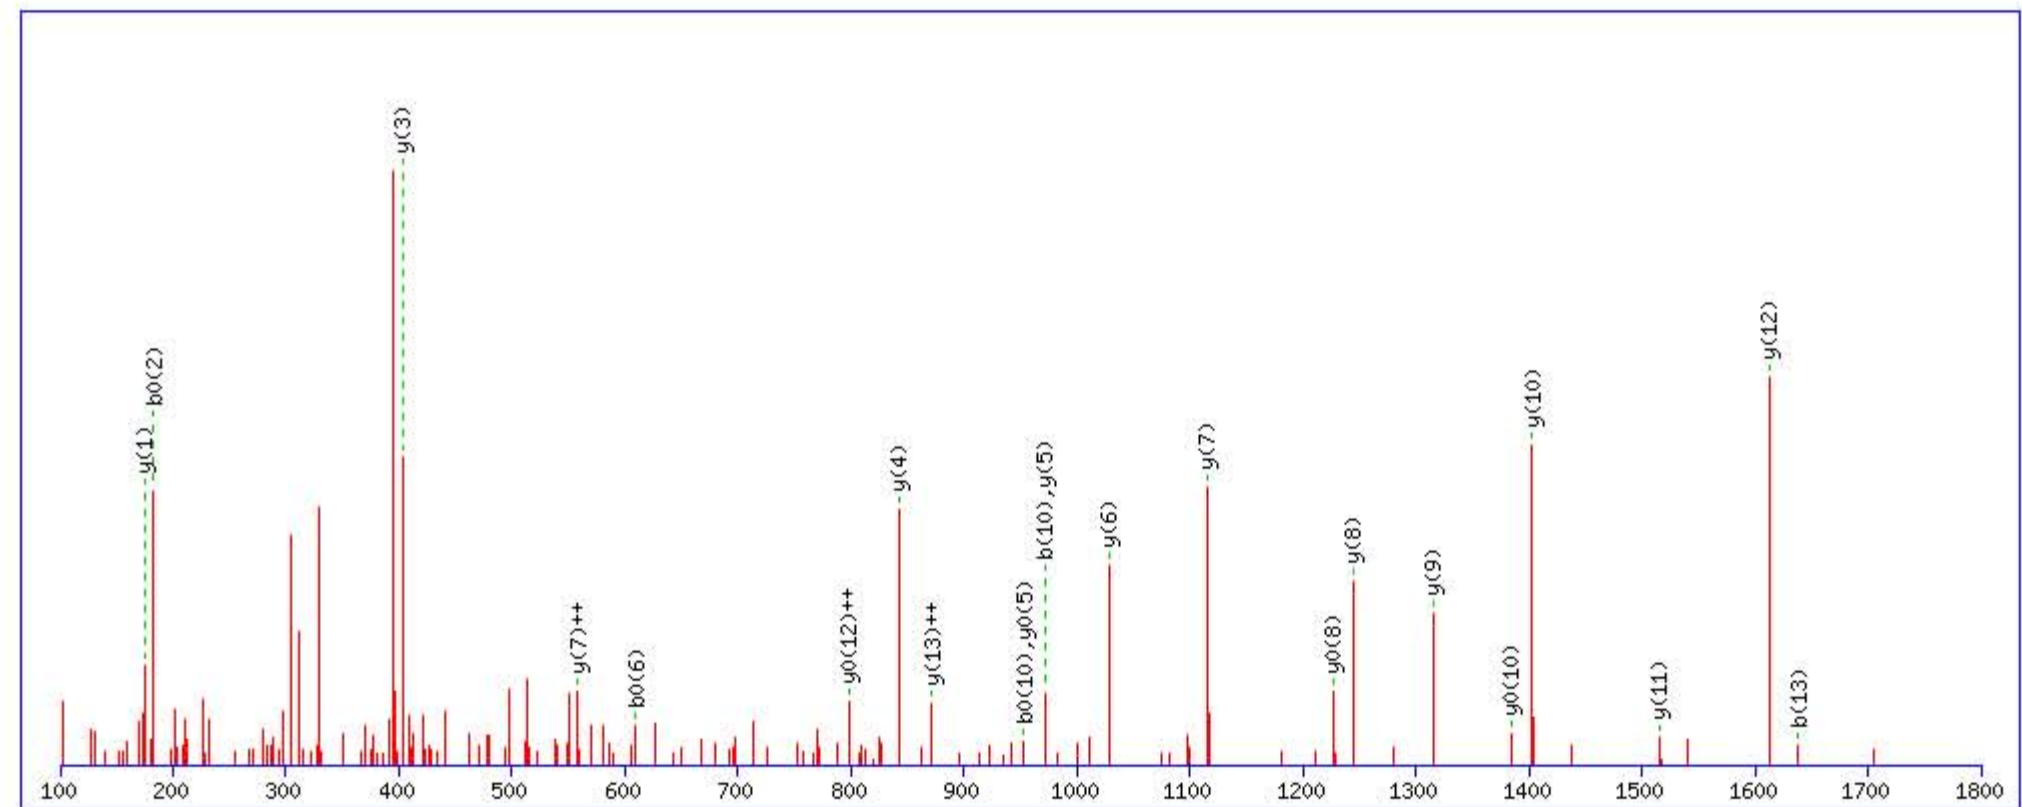

Monoisotopic mass of neutral peptide Mr(calc): 1940.951324

Fixed modifications: Carbamidomethyl (C) (apply to specified residues or termini only)

Variable modifications:

Q12 : Biotin:Thermo-21345 (Q)

Ions Score: 76 Expect: 2.3e-007

Matches : 22/142 fragment ions using 33 most intense peaks [\(help\)](#)

| #  | b           | b <sup>++</sup> | b <sup>*</sup> | b <sup>++</sup> | b <sup>0</sup> | b <sup>0++</sup> | Seq. | y           | y <sup>++</sup> | y <sup>*</sup> | y <sup>++</sup> | y <sup>0</sup> | y <sup>0++</sup> | #  |
|----|-------------|-----------------|----------------|-----------------|----------------|------------------|------|-------------|-----------------|----------------|-----------------|----------------|------------------|----|
| 1  | 100.075690  | 50.541483       |                |                 |                |                  | V    |             |                 |                |                 |                |                  | 15 |
| 2  | 201.123369  | 101.065322      |                |                 | 183.112804     | 92.060040        | T    | 1842.890205 | 921.948741      | 1825.863656    | 913.435466      | 1824.879640    | 912.943458       | 14 |
| 3  | 330.165962  | 165.586619      |                |                 | 312.155397     | 156.581336       | E    | 1741.842526 | 871.424901      | 1724.815977    | 862.911627      | 1723.831961    | 862.419619       | 13 |
| 4  | 427.218726  | 214.113001      |                |                 | 409.208161     | 205.107719       | P    | 1612.799933 | 806.903605      | 1595.773384    | 798.390330      | 1594.789368    | 797.898322       | 12 |
| 5  | 540.302790  | 270.655033      |                |                 | 522.292225     | 261.649751       | I    | 1515.747169 | 758.377223      | 1498.720620    | 749.863948      | 1497.736604    | 749.371940       | 11 |
| 6  | 627.334818  | 314.171047      |                |                 | 609.324253     | 305.165765       | S    | 1402.663105 | 701.835191      | 1385.636556    | 693.321916      | 1384.652540    | 692.829908       | 10 |
| 7  | 698.371932  | 349.689604      |                |                 | 680.361367     | 340.684322       | A    | 1315.631077 | 658.319177      | 1298.604528    | 649.805902      | 1297.620512    | 649.313894       | 9  |
| 8  | 827.414525  | 414.210901      |                |                 | 809.403960     | 405.205618       | E    | 1244.593963 | 622.800620      | 1227.567414    | 614.287345      | 1226.583398    | 613.795337       | 8  |
| 9  | 914.446553  | 457.726915      |                |                 | 896.435988     | 448.721632       | S    | 1115.551370 | 558.279323      | 1098.524821    | 549.766049      | 1097.540805    | 549.274041       | 7  |
| 10 | 971.468017  | 486.237647      |                |                 | 953.457452     | 477.232364       | G    | 1028.519342 | 514.763309      | 1011.492793    | 506.250035      | 1010.508777    | 505.758027       | 6  |
| 11 | 1100.510610 | 550.758943      |                |                 | 1082.500045    | 541.753661       | E    | 971.497878  | 486.252577      | 954.471329     | 477.739303      | 953.487313     | 477.247295       | 5  |
| 12 | 1539.735936 | 770.371606      | 1522.709387    | 761.858332      | 1521.725371    | 761.366324       | Q    | 842.455285  | 421.731281      | 825.428736     | 413.218006      | 824.444720     | 412.725998       | 4  |
| 13 | 1638.804350 | 819.905813      | 1621.777801    | 811.392539      | 1620.793785    | 810.900531       | V    | 403.229959  | 202.118617      | 386.203410     | 193.605343      | 385.219394     | 193.113335       | 3  |
| 14 | 1767.846943 | 884.427110      | 1750.820394    | 875.913835      | 1749.836378    | 875.421827       | E    | 304.161545  | 152.584410      | 287.134996     | 144.071136      | 286.150980     | 143.579128       | 2  |
| 15 |             |                 |                |                 |                |                  | R    | 175.118952  | 88.063114       | 158.092403     | 79.549839       |                |                  | 1  |

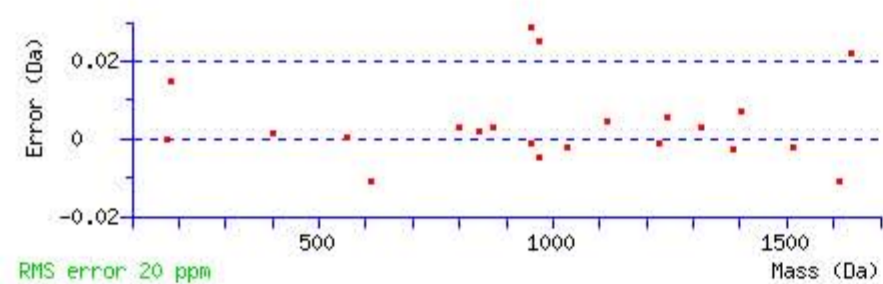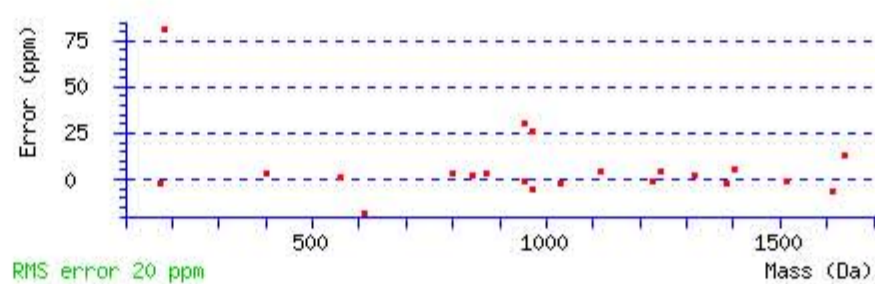

NCBI BLAST search of **VTEPISAESGEQVER**

(Parameters: blastp, nr protein database, expect=20000, no filter, PAM30)

Other BLAST [web gateways](#)

All matches to this query

| Score | Mr(calc):   | Delta     | Sequence                        |
|-------|-------------|-----------|---------------------------------|
| 75.6  | 1940.951324 | -0.006602 | <a href="#">VTEPISAESGEQVER</a> |
| 4.8   | 1940.937378 | 0.007344  | <a href="#">SNNLEREQQLDR</a>    |

Mascot: <http://www.matrixscience.com/>

# MASCOT SCIENCE Mascot Search Results

## Peptide View

MS/MS Fragmentation of **NQEACELSNN**

Found in **APOM\_HUMAN**, Apolipoprotein M OS=Homo sapiens GN=APOM PE=1 SV=2

Match to Query 26844: 1488.625448 from(745.320000,2+) rtinseconds(1675) index(16971)

Title: Locus:1.1.1.3149.14 File:"2013-07-02 CLN FXIII 180 min 3rd F 2.wiff"

Data file C:\Program Files (x86)\Matrix Science\Mascot Daemon\mgf\9 FXIII 180 min 3rd\mascot\_daemon\_merge.mgf

Click mouse within plot area to zoom in by factor of two about that point

Or, Plot from  to  Da

Label all possible matches  Label matches used for scoring

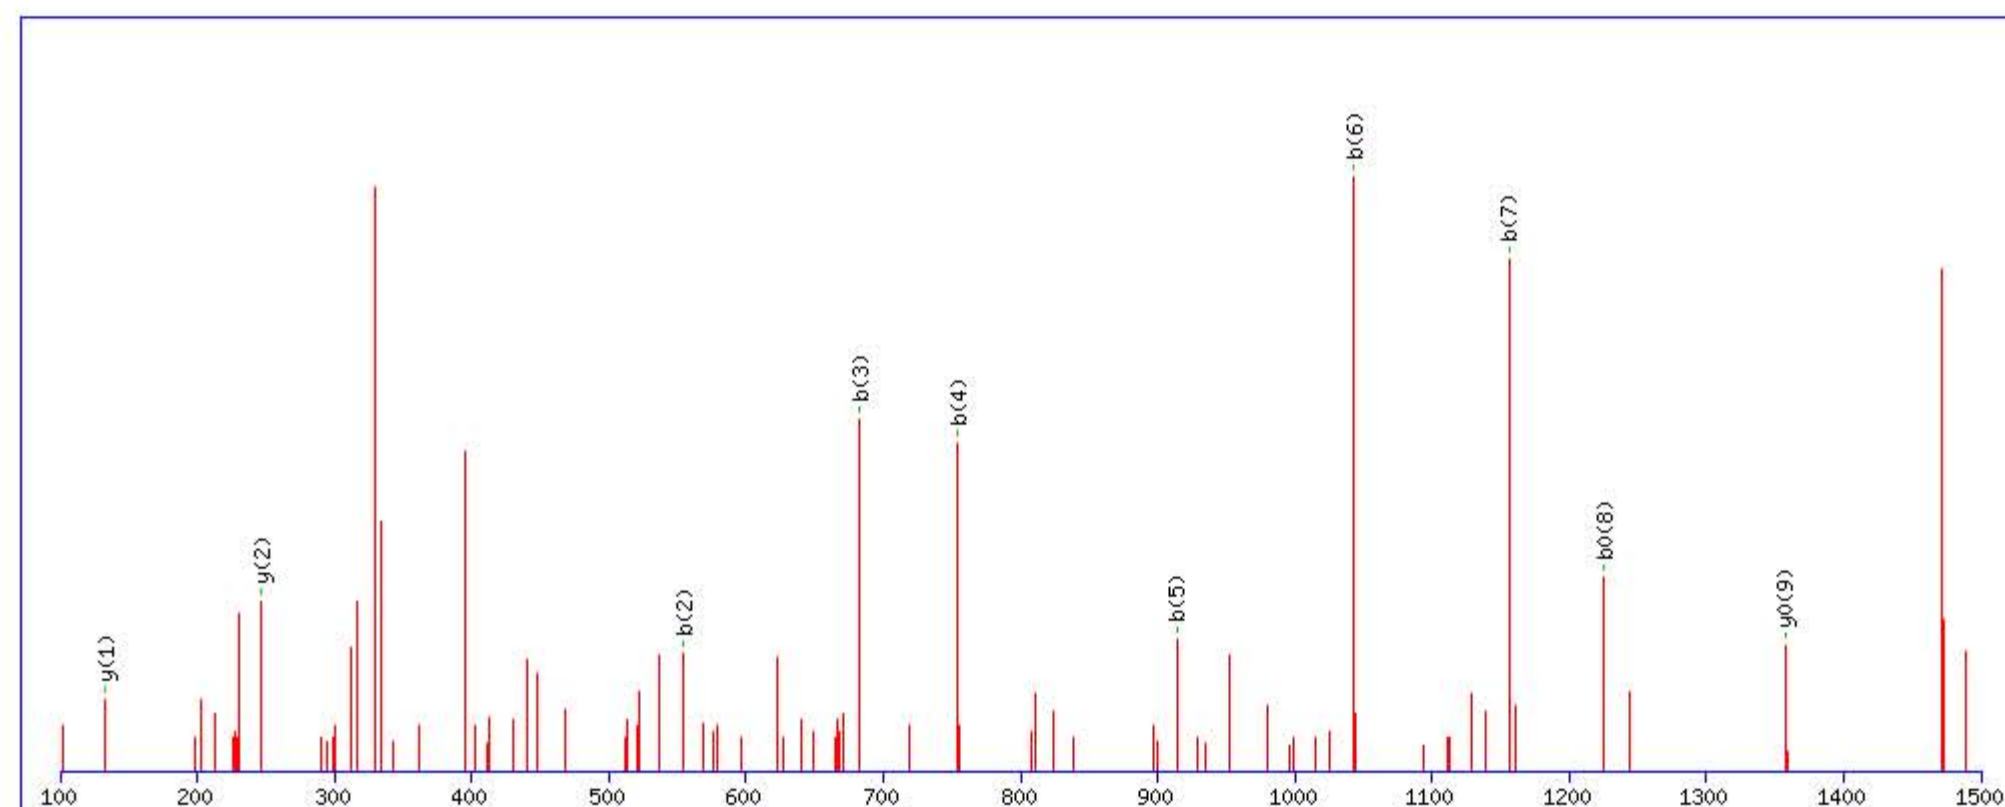

Monoisotopic mass of neutral peptide Mr(calc): 1488.633682

Fixed modifications: Carbamidomethyl (C) (apply to specified residues or termini only)

Variable modifications:

Q2 : Biotin:Thermo-21345 (Q)

Ions Score: 56 Expect: 6.6e-006

Matches : 11/100 fragment ions using 14 most intense peaks [\(help\)](#)

| #  | b                  | b <sup>++</sup> | b <sup>*</sup> | b <sup>+++</sup> | b <sup>0</sup>     | b <sup>0++</sup> | Seq. | y                 | y <sup>++</sup> | y <sup>*</sup> | y <sup>+++</sup> | y <sup>0</sup>     | y <sup>0++</sup> | #  |
|----|--------------------|-----------------|----------------|------------------|--------------------|------------------|------|-------------------|-----------------|----------------|------------------|--------------------|------------------|----|
| 1  | 115.050203         | 58.028740       | 98.023654      | 49.515465        |                    |                  | N    |                   |                 |                |                  |                    |                  | 10 |
| 2  | <b>554.275529</b>  | 277.641403      | 537.248980     | 269.128128       |                    |                  | Q    | 1375.598062       | 688.302669      | 1358.571513    | 679.789395       | <b>1357.587497</b> | 679.297387       | 9  |
| 3  | <b>683.318122</b>  | 342.162699      | 666.291573     | 333.649425       | 665.307557         | 333.157417       | E    | 936.372736        | 468.690006      | 919.346187     | 460.176732       | 918.362171         | 459.684724       | 8  |
| 4  | <b>754.355236</b>  | 377.681256      | 737.328687     | 369.167982       | 736.344671         | 368.675974       | A    | 807.330143        | 404.168710      | 790.303594     | 395.655435       | 789.319578         | 395.163427       | 7  |
| 5  | <b>914.385885</b>  | 457.696581      | 897.359336     | 449.183306       | 896.375320         | 448.691298       | C    | 736.293029        | 368.650153      | 719.266480     | 360.136878       | 718.282464         | 359.644870       | 6  |
| 6  | <b>1043.428478</b> | 522.217877      | 1026.401929    | 513.704603       | 1025.417913        | 513.212595       | E    | 576.262380        | 288.634828      | 559.235831     | 280.121554       | 558.251815         | 279.629546       | 5  |
| 7  | <b>1156.512542</b> | 578.759909      | 1139.485993    | 570.246635       | 1138.501977        | 569.754626       | L    | 447.219787        | 224.113531      | 430.193238     | 215.600257       | 429.209222         | 215.108249       | 4  |
| 8  | 1243.544570        | 622.275923      | 1226.518021    | 613.762649       | <b>1225.534005</b> | 613.270641       | S    | 334.135723        | 167.571499      | 317.109174     | 159.058225       | 316.125158         | 158.566217       | 3  |
| 9  | <b>1357.587497</b> | 679.297387      | 1340.560948    | 670.784112       | 1339.576932        | 670.292104       | N    | <b>247.103695</b> | 124.055485      | 230.077146     | 115.542211       |                    |                  | 2  |
| 10 |                    |                 |                |                  |                    |                  | N    | <b>133.060768</b> | 67.034022       | 116.034219     | 58.520747        |                    |                  | 1  |

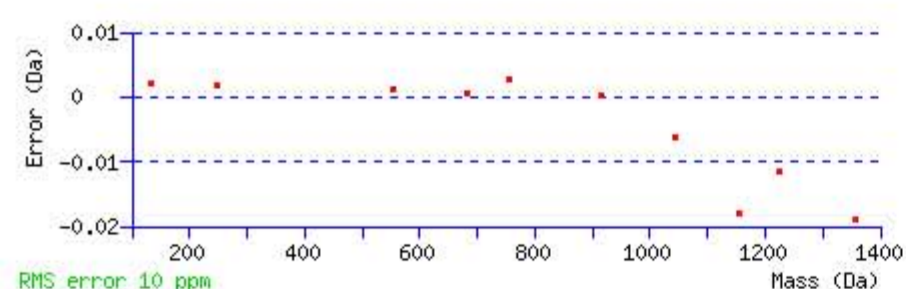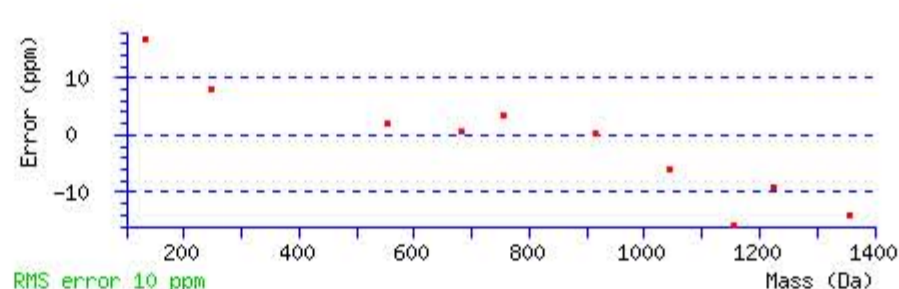

NCBI BLAST search of [NQEACELSNN](#)

(Parameters: blastp, nr protein database, expect=20000, no filter, PAM30)

Other BLAST [web gateways](#)

All matches to this query

| Score | Mr(calc):   | Delta     | Sequence                   |
|-------|-------------|-----------|----------------------------|
| 56.5  | 1488.633682 | -0.008234 | <a href="#">NQEACELSNN</a> |

Mascot: <http://www.matrixscience.com/>



# MASCOT SEARCH RESULTS

## Peptide View

MS/MS Fragmentation of **SCALDQNCQWEPR**

Found in **ATRN\_HUMAN**, Attractin OS=Homo sapiens GN=ATRN PE=1 SV=2

Match to Query 38850: 1973.852468 from(987.933510,2+) rtinseconds(1999) index(19073)

Title: Locus:1.1.1.3261.9 File:"2013-07-02 CLN FXIII 180 min 3rd F 2.wiff"

Data file C:\Program Files (x86)\Matrix Science\Mascot Daemon\mgf9 FXIII 180 min 3rd\mascot\_daemon\_merge.mgf

Click mouse within plot area to zoom in by factor of two about that point

Or, Plot from  to  Da

Label all possible matches  Label matches used for scoring

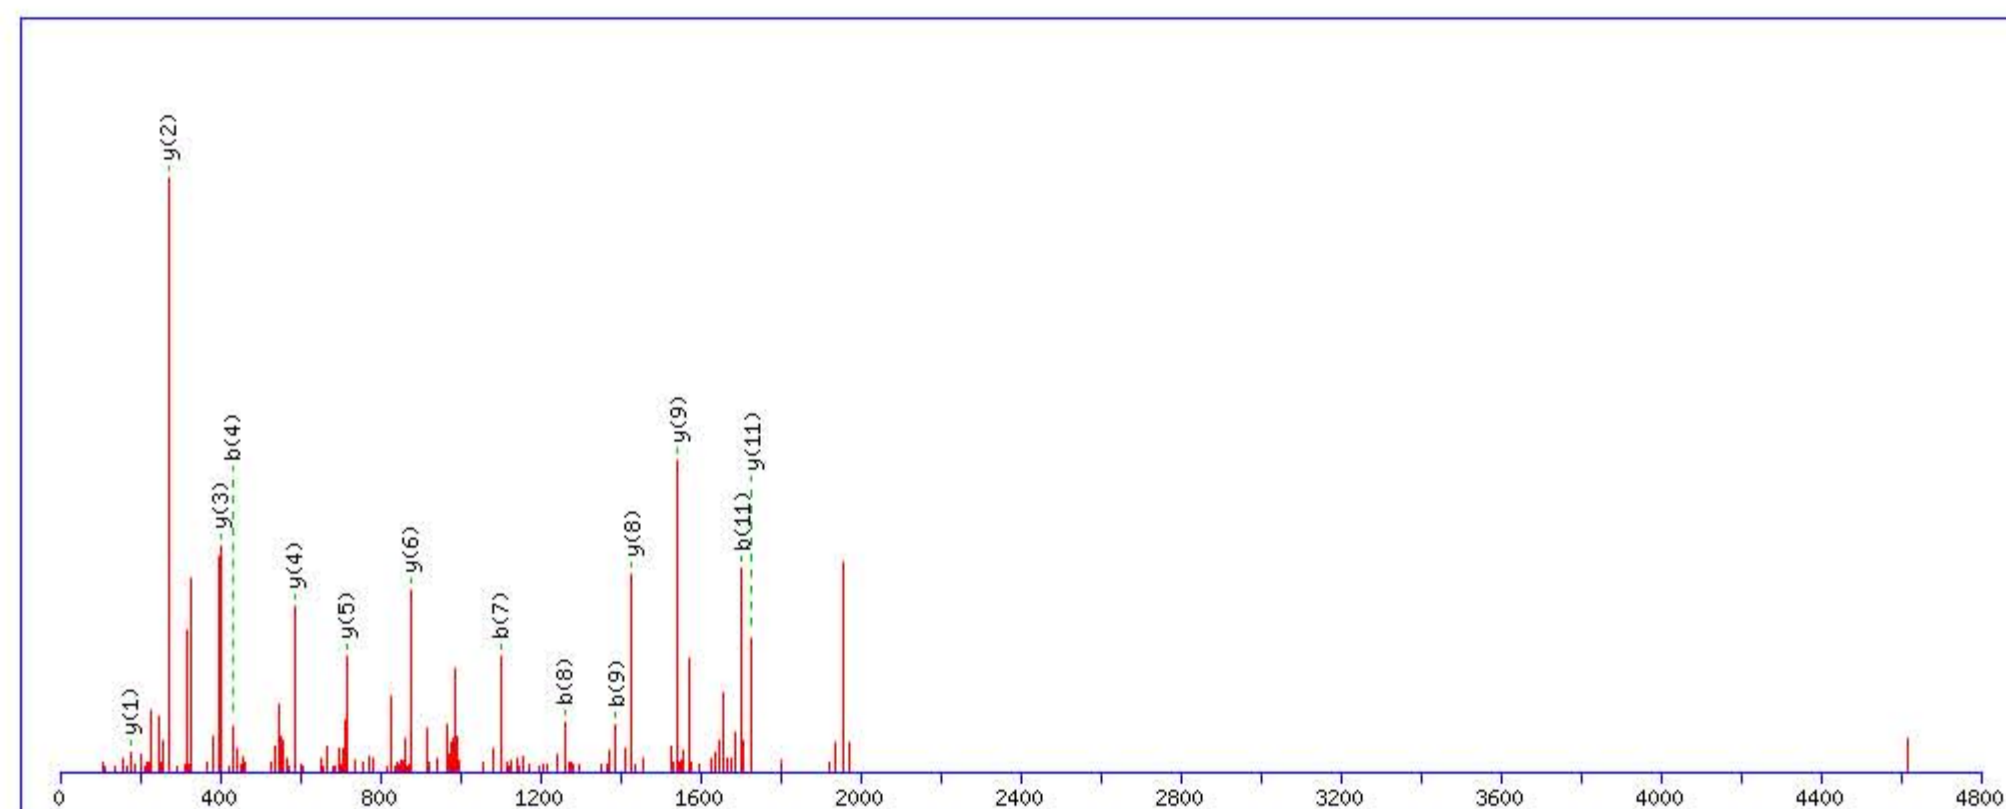

Monoisotopic mass of neutral peptide Mr(calc): 1973.854614

Fixed modifications: Carbamidomethyl (C) (apply to specified residues or termini only)

Variable modifications:

Q6 : Biotin:Thermo-21345 (Q)

Ions Score: 76 Expect: 8.5e-008

Matches : 14/130 fragment ions using 18 most intense peaks [\(help\)](#)

| #  | b                  | b <sup>++</sup> | b <sup>*</sup> | b <sup>*++</sup> | b <sup>0</sup> | b <sup>0++</sup> | Seq. | y                  | y <sup>++</sup> | y <sup>*</sup> | y <sup>*++</sup> | y <sup>0</sup> | y <sup>0++</sup> | #  |
|----|--------------------|-----------------|----------------|------------------|----------------|------------------|------|--------------------|-----------------|----------------|------------------|----------------|------------------|----|
| 1  | 88.039304          | 44.523290       |                |                  | 70.028739      | 35.518008        | S    |                    |                 |                |                  |                |                  | 13 |
| 2  | 248.069953         | 124.538614      |                |                  | 230.059388     | 115.533332       | C    | 1887.829872        | 944.418574      | 1870.803323    | 935.905300       | 1869.819307    | 935.413292       | 12 |
| 3  | 319.107067         | 160.057171      |                |                  | 301.096502     | 151.051889       | A    | <b>1727.799223</b> | 864.403250      | 1710.772674    | 855.889975       | 1709.788658    | 855.397967       | 11 |
| 4  | <b>432.191131</b>  | 216.599203      |                |                  | 414.180566     | 207.593921       | L    | 1656.762109        | 828.884693      | 1639.735560    | 820.371418       | 1638.751544    | 819.879410       | 10 |
| 5  | 547.218074         | 274.112675      |                |                  | 529.207509     | 265.107393       | D    | <b>1543.678045</b> | 772.342661      | 1526.651496    | 763.829386       | 1525.667480    | 763.337378       | 9  |
| 6  | 986.443400         | 493.725338      | 969.416851     | 485.212064       | 968.432835     | 484.720056       | Q    | <b>1428.651102</b> | 714.829189      | 1411.624553    | 706.315915       | 1410.640537    | 705.823907       | 8  |
| 7  | <b>1100.486327</b> | 550.746802      | 1083.459778    | 542.233527       | 1082.475762    | 541.741519       | N    | 989.425776         | 495.216526      | 972.399227     | 486.703252       | 971.415211     | 486.211244       | 7  |
| 8  | <b>1260.516976</b> | 630.762126      | 1243.490427    | 622.248852       | 1242.506411    | 621.756844       | C    | <b>875.382849</b>  | 438.195063      | 858.356300     | 429.681788       | 857.372284     | 429.189780       | 6  |
| 9  | <b>1388.575554</b> | 694.791415      | 1371.549005    | 686.278141       | 1370.564989    | 685.786133       | Q    | <b>715.352200</b>  | 358.179738      | 698.325651     | 349.666464       | 697.341635     | 349.174456       | 5  |
| 10 | 1574.654867        | 787.831072      | 1557.628318    | 779.317797       | 1556.644302    | 778.825789       | W    | <b>587.293622</b>  | 294.150449      | 570.267073     | 285.637174       | 569.283057     | 285.145166       | 4  |
| 11 | <b>1703.697460</b> | 852.352368      | 1686.670911    | 843.839094       | 1685.686895    | 843.347086       | E    | <b>401.214309</b>  | 201.110792      | 384.187760     | 192.597518       | 383.203744     | 192.105510       | 3  |
| 12 | 1800.750224        | 900.878750      | 1783.723675    | 892.365476       | 1782.739659    | 891.873468       | P    | <b>272.171716</b>  | 136.589496      | 255.145167     | 128.076221       |                |                  | 2  |
| 13 |                    |                 |                |                  |                |                  | R    | <b>175.118952</b>  | 88.063114       | 158.092403     | 79.549839        |                |                  | 1  |

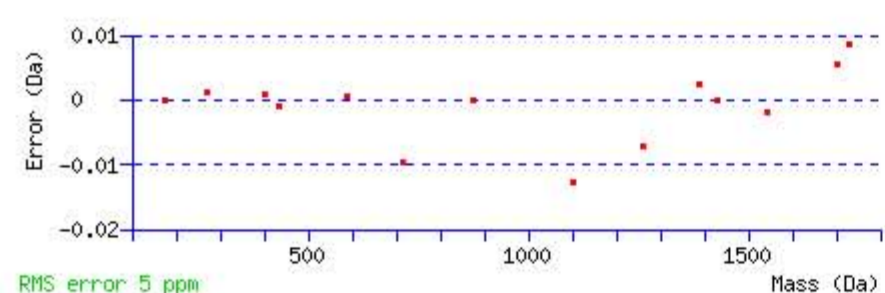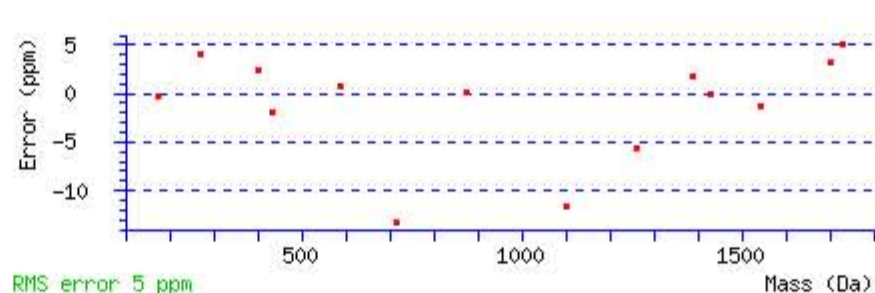

NCBI BLAST search of **SCALDQNCQWEPR**

(Parameters: blastp, nr protein database, expect=20000, no filter, PAM30)

Other BLAST [web gateways](#)

All matches to this query

| Score | Mr(calc):   | Delta     | Sequence                           |
|-------|-------------|-----------|------------------------------------|
| 76.4  | 1973.854614 | -0.002146 | <a href="#">SCALDQNCQWEPR</a>      |
| 41.9  | 1973.854614 | -0.002146 | <a href="#">SCALDQNCQWEPR</a>      |
| 13.0  | 1973.853729 | -0.001261 | <a href="#">DSPETGEEMGRAEGAWPR</a> |
| 4.3   | 1973.831284 | 0.021184  | <a href="#">CSDYESIEVPDSYTGPR</a>  |

Mascot: <http://www.matrixscience.com/>

*MATRIX SCIENCE* Mascot Search Results

Peptide View

MS/MS Fragmentation of **KCSYTEDAQCIDGTIEVPK**

Found in **APOH\_HUMAN**, Beta-2-glycoprotein 1 OS=Homo sapiens GN=APOH PE=1 SV=3

Match to Query 48817: 2524.177632 from(842.399820,3+) rtinseconds(2002) index(60663)  
 Title: Locus:1.1.1.1608.26 File:"2013-07-02 CLN FXIII 180 min 3rd FT.wiff"  
 Data file C:\Program Files (x86)\Matrix Science\Mascot Daemon\mgf\9 FXIII 180 min 3rd\mascot\_daemon\_merge.mgf

Click mouse within plot area to zoom in by factor of two about that point  
 Or, Plot from 100 to 1800 Da Full range  
 Label all possible matches  Label matches used for scoring

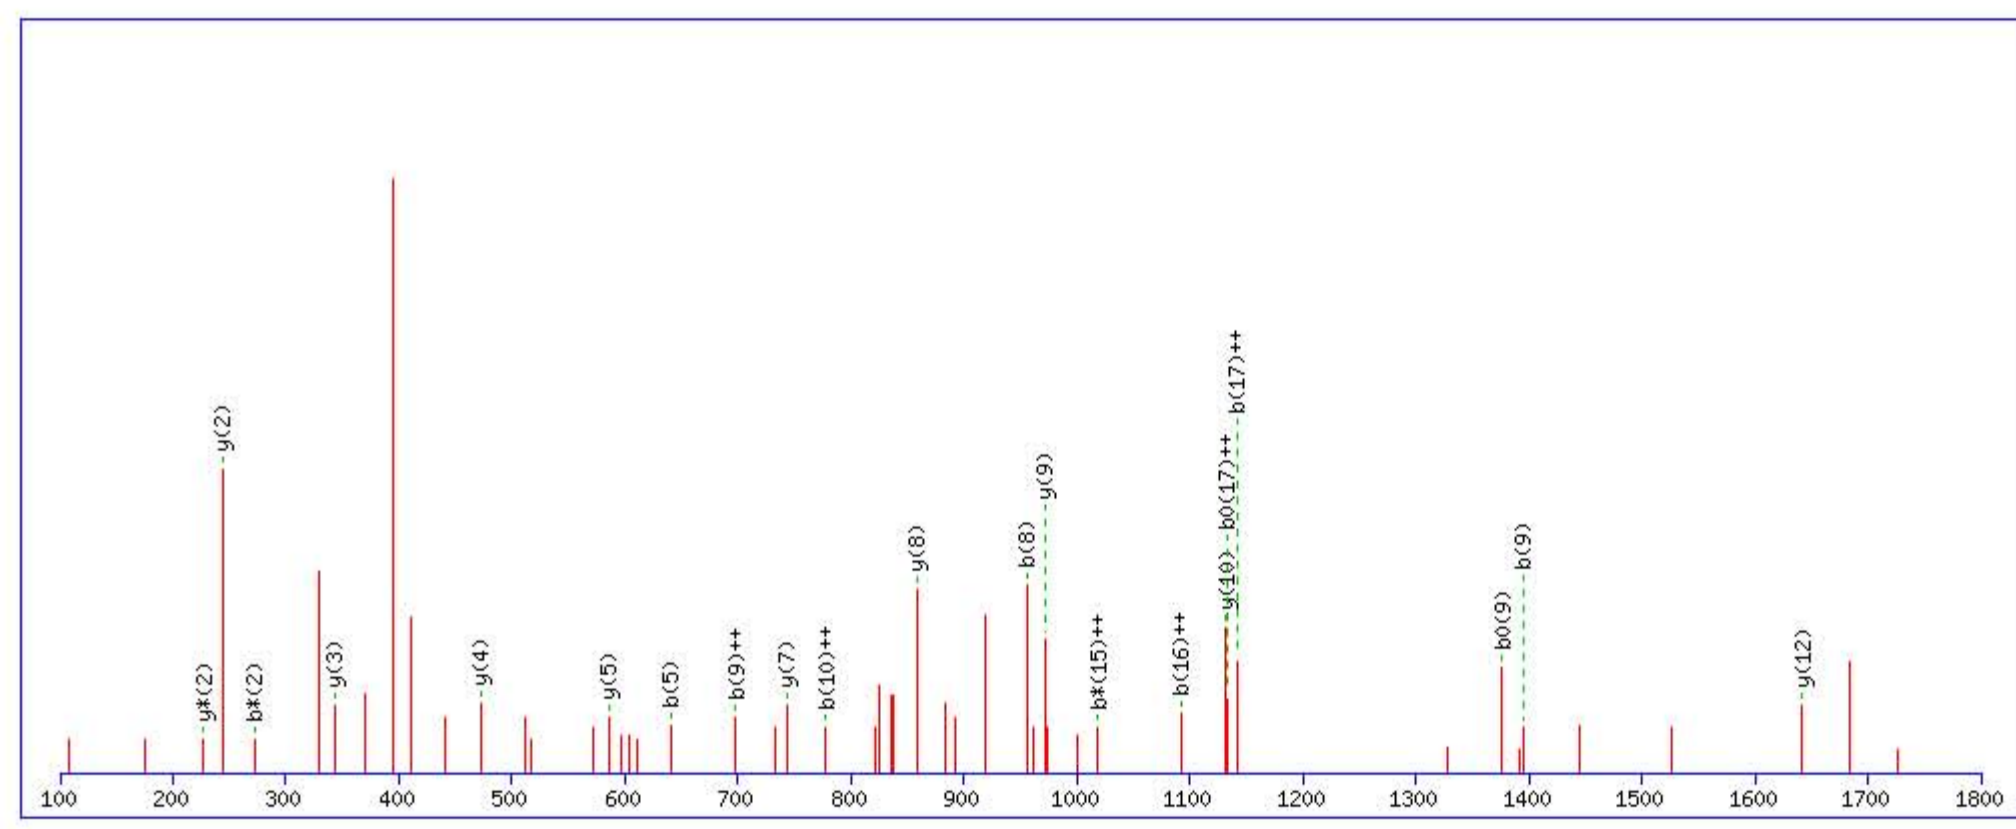

Monoisotopic mass of neutral peptide Mr(calc): 2524.164780  
 Fixed modifications: Carbamidomethyl (C) (apply to specified residues or termini only)  
 Variable modifications:  
 Q9 : Biotin:Thermo-21345 (Q)  
 Ions Score: 36 Expect: 0.00055  
 Matches : 21/206 fragment ions using 46 most intense peaks (help)

| #  | b           | b <sup>++</sup> | b <sup>+</sup> | b <sup>+++</sup> | b <sup>0</sup> | b <sup>0++</sup> | Seq. | y           | y <sup>++</sup> | y <sup>+</sup> | y <sup>+++</sup> | y <sup>0</sup> | y <sup>0++</sup> | #  |
|----|-------------|-----------------|----------------|------------------|----------------|------------------|------|-------------|-----------------|----------------|------------------|----------------|------------------|----|
| 1  | 129.102239  | 65.054757       | 112.075690     | 56.541483        |                |                  | K    |             |                 |                |                  |                |                  | 19 |
| 2  | 289.132888  | 145.070082      | 272.106339     | 136.556808       |                |                  | C    | 2397.077099 | 1199.042187     | 2380.050550    | 1190.528913      | 2379.066534    | 1190.036905      | 18 |
| 3  | 376.164916  | 188.586096      | 359.138367     | 180.072822       | 358.154351     | 179.580814       | S    | 2237.046450 | 1119.026863     | 2220.019901    | 1110.513588      | 2219.035885    | 1110.021580      | 17 |
| 4  | 539.228245  | 270.117761      | 522.201696     | 261.604486       | 521.217680     | 261.112478       | Y    | 2150.014422 | 1075.510849     | 2132.987873    | 1066.997574      | 2132.003857    | 1066.505566      | 16 |
| 5  | 640.275924  | 320.641600      | 623.249375     | 312.128326       | 622.265359     | 311.636318       | T    | 1986.951093 | 993.979185      | 1969.924544    | 985.465910       | 1968.940528    | 984.973902       | 15 |
| 6  | 769.318517  | 385.162897      | 752.291968     | 376.649622       | 751.307952     | 376.157614       | E    | 1885.903414 | 943.455345      | 1868.876865    | 934.942071       | 1867.892849    | 934.450063       | 14 |
| 7  | 884.345460  | 442.676368      | 867.318911     | 434.163094       | 866.334895     | 433.671086       | D    | 1756.860821 | 878.934049      | 1739.834272    | 870.420774       | 1738.850256    | 869.928766       | 13 |
| 8  | 955.382574  | 478.194925      | 938.356025     | 469.681650       | 937.372009     | 469.189642       | A    | 1641.833878 | 821.420577      | 1624.807329    | 812.907303       | 1623.823313    | 812.415295       | 12 |
| 9  | 1394.607900 | 697.807588      | 1377.581351    | 689.294314       | 1376.597335    | 688.802306       | Q    | 1570.796764 | 785.902020      | 1553.770215    | 777.388746       | 1552.786199    | 776.896738       | 11 |
| 10 | 1554.638549 | 777.822913      | 1537.612000    | 769.309638       | 1536.627984    | 768.817630       | C    | 1131.571438 | 566.289357      | 1114.544889    | 557.776083       | 1113.560873    | 557.284075       | 10 |
| 11 | 1667.722613 | 834.364945      | 1650.696064    | 825.851670       | 1649.712048    | 825.359662       | I    | 971.540789  | 486.274033      | 954.514240     | 477.760758       | 953.530224     | 477.268750       | 9  |
| 12 | 1782.749556 | 891.878416      | 1765.723007    | 883.365142       | 1764.738991    | 882.873134       | D    | 858.456725  | 429.732001      | 841.430176     | 421.218726       | 840.446160     | 420.726718       | 8  |
| 13 | 1839.771020 | 920.389148      | 1822.744471    | 911.875874       | 1821.760455    | 911.383866       | G    | 743.429782  | 372.218529      | 726.403233     | 363.705255       | 725.419217     | 363.213247       | 7  |
| 14 | 1940.818699 | 970.912988      | 1923.792150    | 962.399713       | 1922.808134    | 961.907705       | T    | 686.408318  | 343.707797      | 669.381769     | 335.194523       | 668.397753     | 334.702515       | 6  |
| 15 | 2053.902763 | 1027.455019     | 2036.876214    | 1018.941745      | 2035.892198    | 1018.449737      | I    | 585.360639  | 293.183958      | 568.334090     | 284.670683       | 567.350074     | 284.178675       | 5  |
| 16 | 2182.945356 | 1091.976316     | 2165.918807    | 1083.463041      | 2164.934791    | 1082.971034      | E    | 472.276575  | 236.641925      | 455.250026     | 228.128651       | 454.266010     | 227.636643       | 4  |
| 17 | 2282.013770 | 1141.510523     | 2264.987221    | 1132.997248      | 2264.003205    | 1132.505240      | V    | 343.233982  | 172.120629      | 326.207433     | 163.607354       |                |                  | 3  |
| 18 | 2379.066534 | 1190.036905     | 2362.039985    | 1181.523630      | 2361.055969    | 1181.031622      | P    | 244.165568  | 122.586422      | 227.139019     | 114.073148       |                |                  | 2  |
| 19 |             |                 |                |                  |                |                  | K    | 147.112804  | 74.060040       | 130.086255     | 65.546765        |                |                  | 1  |

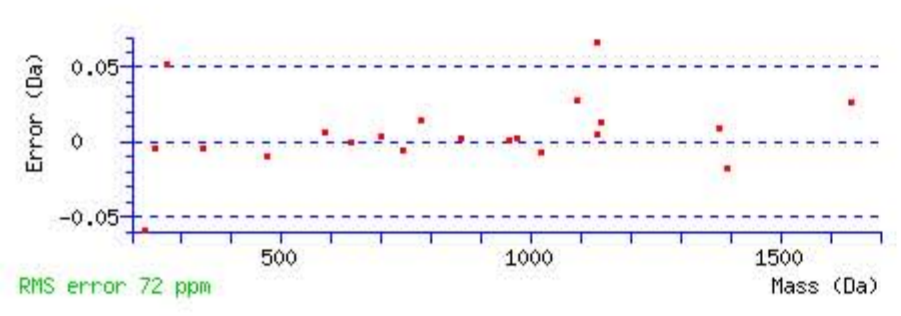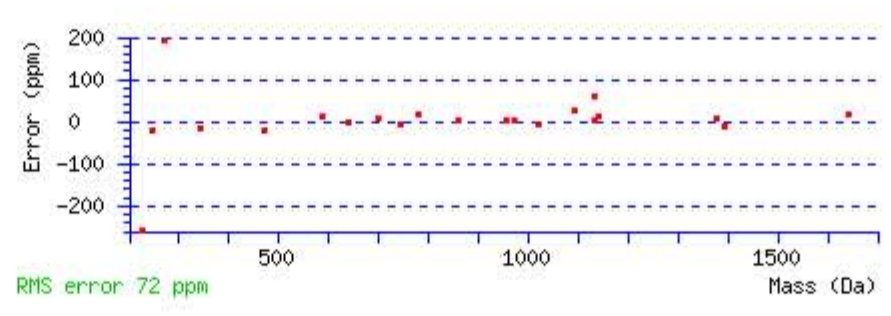

NCBI BLAST search of **KCSYTEDAQCIDGTIEVPK**  
 (Parameters: blastp, nr protein database, expect=20000, no filter, PAM30)  
 Other BLAST [web gateways](#)

All matches to this query

| Score | Mr(calc):   | Delta     | Sequence                              |
|-------|-------------|-----------|---------------------------------------|
| 36.0  | 2524.164780 | 0.012852  | <a href="#">KCSYTEDAQCIDGTIEVPK</a>   |
| 1.2   | 2524.209503 | -0.031871 | <a href="#">EHIEGGGGPSPDFGKFRAPPR</a> |

# MASCOT Search Results

## Peptide View

### MS/MS Fragmentation of **CEVQDR**

Found in **C4BPA\_HUMAN**, C4b-binding protein alpha chain OS=Homo sapiens GN=C4BPA PE=1 SV=2

Match to Query 14674: 1116.503648 from(559.259100,2+) rtinseconds(1345) index(27956)

Title: Locus:1.1.1.3131.18 File:"2013-07-02 CLN FXIII 180 min 3rd F 3.wiff"

Data file C:\Program Files (x86)\Matrix Science\Mascot Daemon\mgf\9 FXIII 180 min 3rd\mascot\_daemon\_merge.mgf

Click mouse within plot area to zoom in by factor of two about that point

Or, Plot from  to  Da

Label all possible matches  Label matches used for scoring

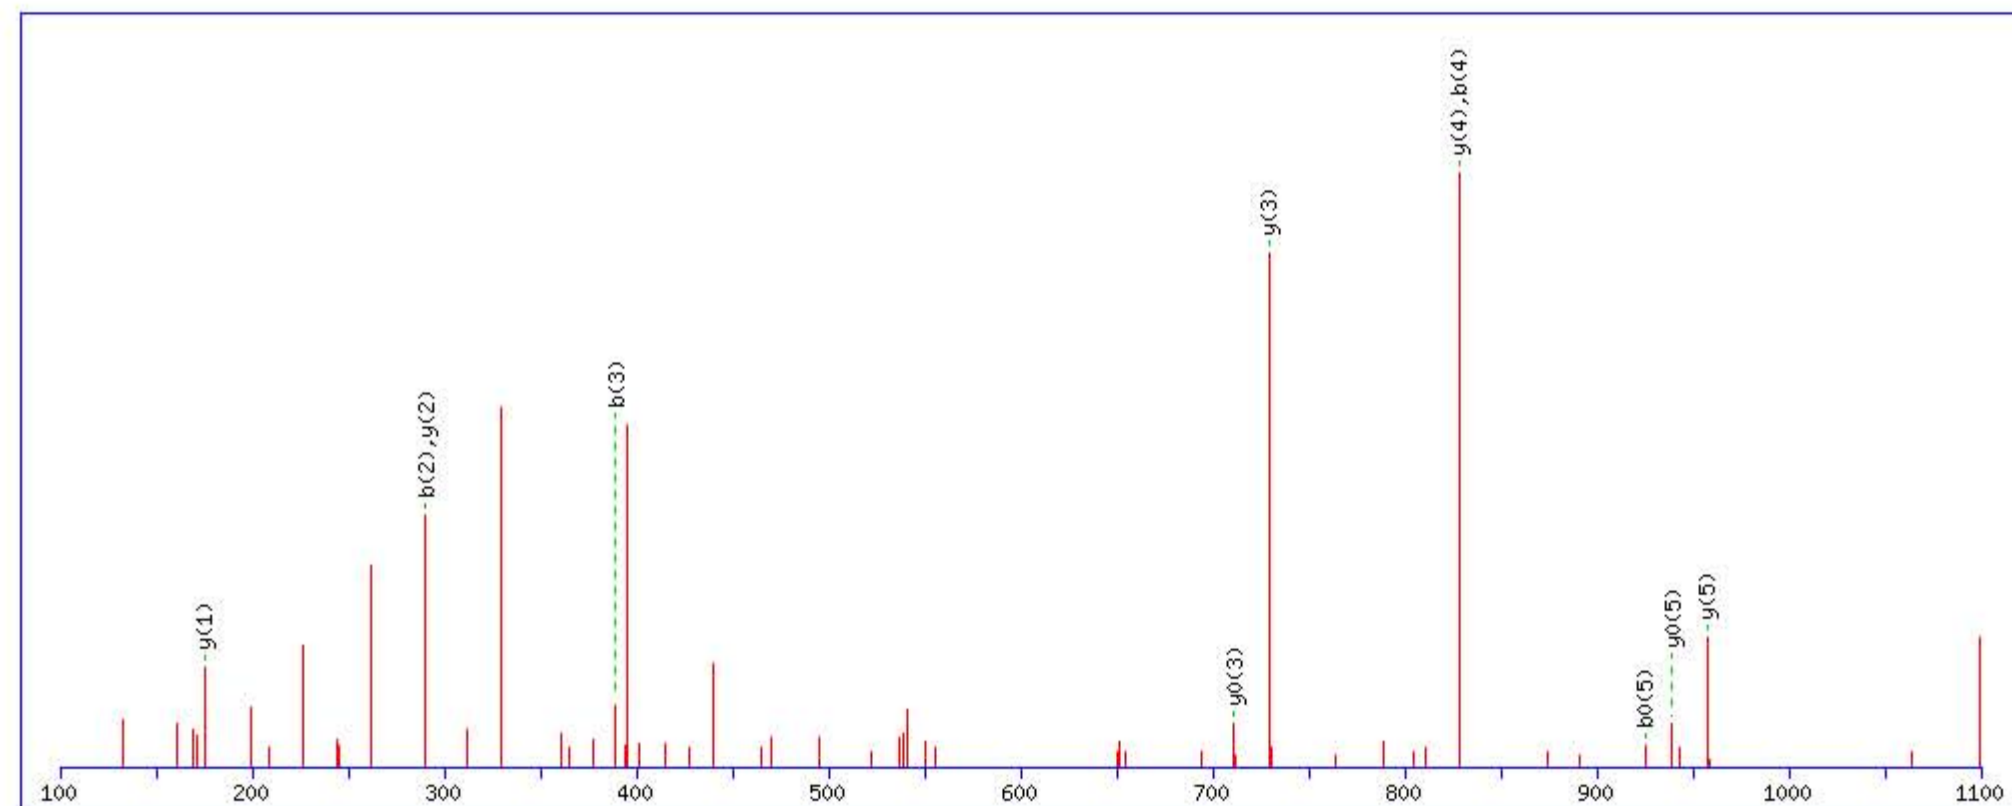

Monoisotopic mass of neutral peptide  $M_r(\text{calc})$ : 1116.505600

Fixed modifications: Carbamidomethyl (C) (apply to specified residues or termini only)

Variable modifications:

Q4 : Biotin:Thermo-21345 (Q)

Ions Score: 28 Expect: 0.01

Matches : 11/50 fragment ions using 20 most intense peaks ([help](#))

| # | b                 | b <sup>++</sup> | b <sup>*</sup> | b <sup>***</sup> | b <sup>0</sup>    | b <sup>0++</sup> | Seq. | y                 | y <sup>++</sup> | y <sup>*</sup> | y <sup>***</sup> | y <sup>0</sup>    | y <sup>0++</sup> | # |
|---|-------------------|-----------------|----------------|------------------|-------------------|------------------|------|-------------------|-----------------|----------------|------------------|-------------------|------------------|---|
| 1 | 161.037925        | 81.022600       |                |                  |                   |                  | C    |                   |                 |                |                  |                   |                  | 6 |
| 2 | <b>290.080518</b> | 145.543897      |                |                  | 272.069953        | 136.538615       | E    | <b>957.482228</b> | 479.244752      | 940.455679     | 470.731478       | <b>939.471663</b> | 470.239470       | 5 |
| 3 | <b>389.148932</b> | 195.078104      |                |                  | 371.138367        | 186.072822       | V    | <b>828.439635</b> | 414.723456      | 811.413086     | 406.210181       | 810.429070        | 405.718173       | 4 |
| 4 | <b>828.374258</b> | 414.690767      | 811.347709     | 406.177493       | 810.363693        | 405.685485       | Q    | <b>729.371221</b> | 365.189249      | 712.344672     | 356.675974       | <b>711.360656</b> | 356.183966       | 3 |
| 5 | 943.401201        | 472.204239      | 926.374652     | 463.690964       | <b>925.390636</b> | 463.198956       | D    | <b>290.145895</b> | 145.576585      | 273.119346     | 137.063311       | 272.135330        | 136.571303       | 2 |
| 6 |                   |                 |                |                  |                   |                  | R    | <b>175.118952</b> | 88.063114       | 158.092403     | 79.549839        |                   |                  | 1 |

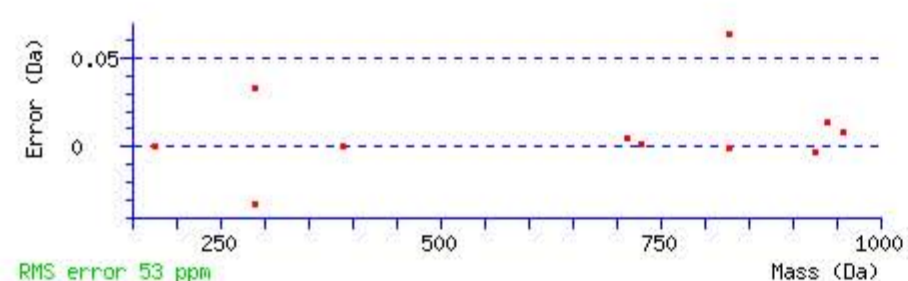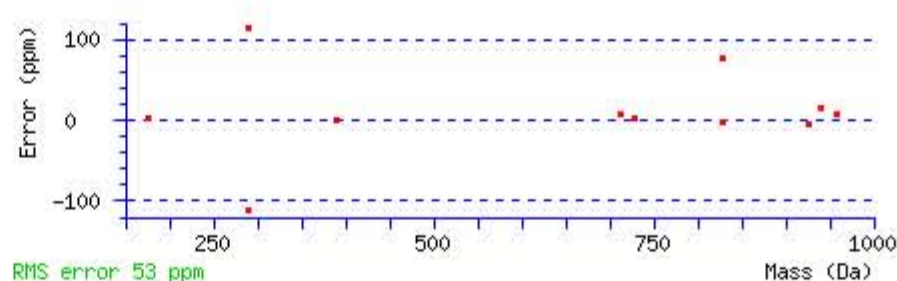

### NCBI BLAST search of **CEVQDR**

(Parameters: blastp, nr protein database, expect=20000, no filter, PAM30)

Other BLAST [web gateways](#)

### All matches to this query

| Score | $M_r(\text{calc})$ : | Delta     | Sequence                  |
|-------|----------------------|-----------|---------------------------|
| 27.8  | 1116.505600          | -0.001952 | <a href="#">CEVQDR</a>    |
| 9.6   | 1116.505600          | -0.001952 | <a href="#">DICQDR</a>    |
| 9.6   | 1116.486984          | 0.016664  | <a href="#">DTDGQDR</a>   |
| 9.6   | 1116.502228          | 0.001420  | <a href="#">SWDQDR</a>    |
| 5.8   | 1116.486969          | 0.016679  | <a href="#">CETSPSSPR</a> |
| 1.9   | 1116.502197          | 0.001451  | <a href="#">NEYNFKMR</a>  |
| 0.0   | 1116.504700          | -0.001052 | <a href="#">ELQAEQEDR</a> |

**MASCOT SCIENCE Mascot Search Results**

**Peptide View**

MS/MS Fragmentation of **GYILVGQAK**

Found in **C4BPA\_HUMAN**, C4b-binding protein alpha chain OS=Homo sapiens GN=C4BPA PE=1 SV=2

Match to Query 19185: 1258.708668 from(630.361610,2+) rtinseconds(2055) index(32194)

Title: Locus:1.1.1.3379.12 File:"2013-07-02 CLN FXIII 180 min 3rd F 3.wiff"

Data file C:\Program Files (x86)\Matrix Science\Mascot Daemon\mgf\9 FXIII 180 min 3rd\mascot\_daemon\_merge.mgf

Click mouse within plot area to zoom in by factor of two about that point

Or, Plot from  to  Da

Label all possible matches  Label matches used for scoring

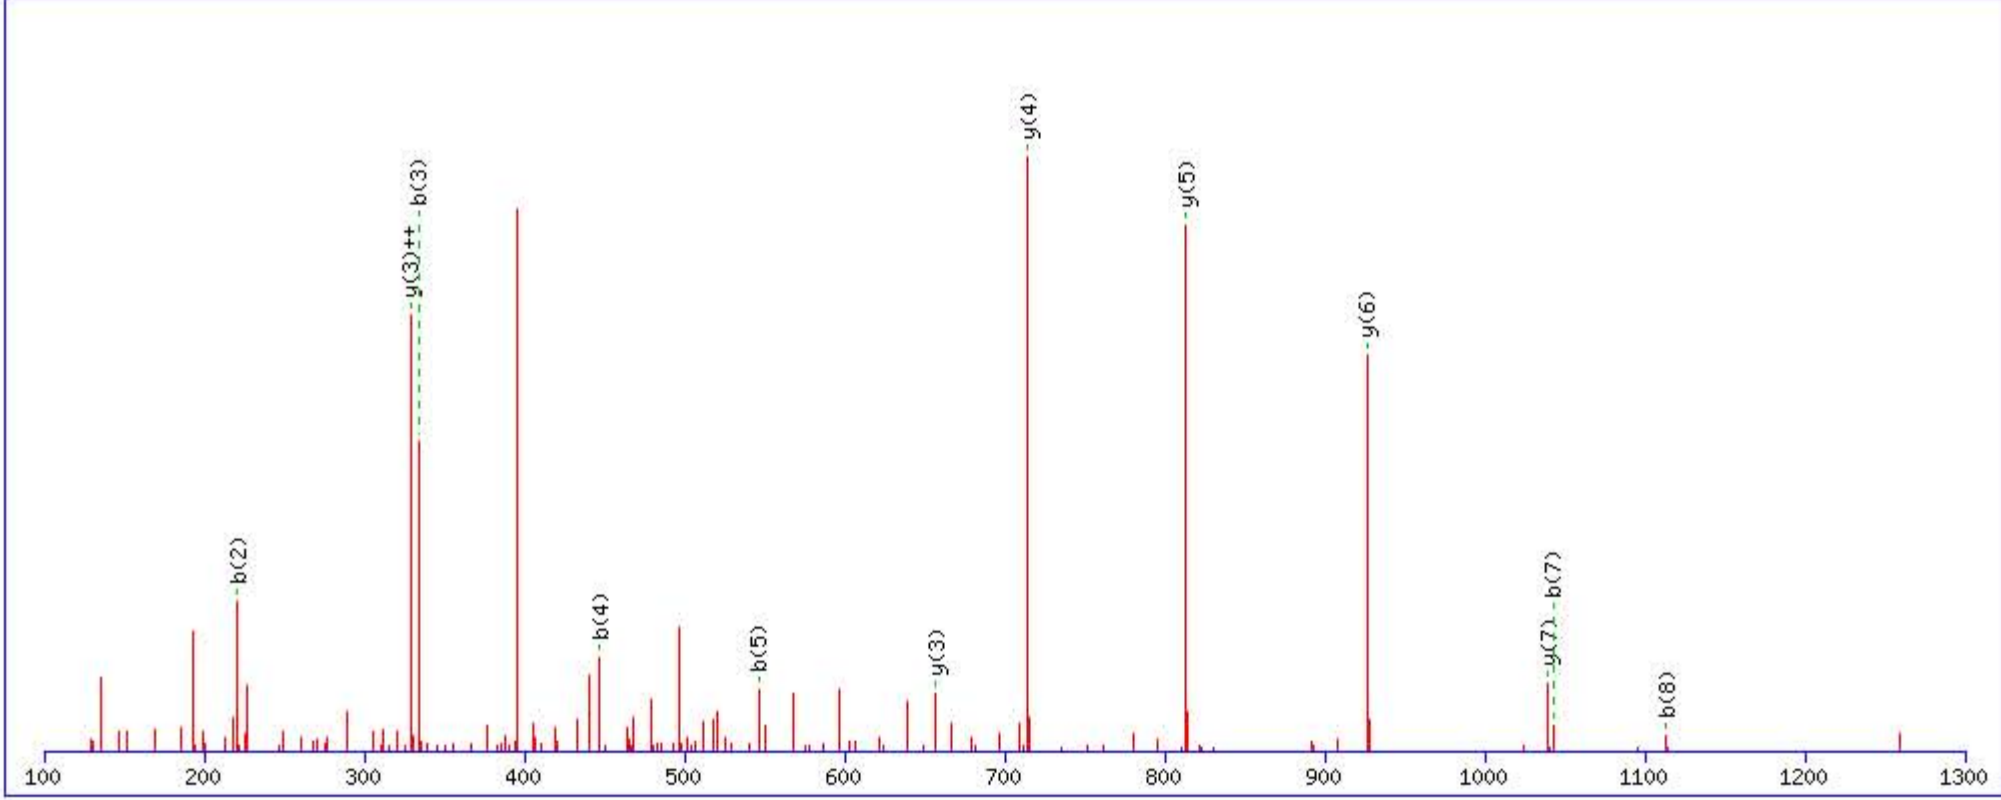

Monoisotopic mass of neutral peptide Mr(calc): 1258.710754

Fixed modifications: Carbamidomethyl (C) (apply to specified residues or termini only)

Variable modifications:

Q7 : Biotin:Thermo-21345 (Q)

Ions Score: 28 Expect: 0.021

Matches : 12/52 fragment ions using 28 most intense peaks [\(help\)](#)

| # | b                  | b <sup>++</sup> | b*          | b <sup>*++</sup> | Seq. | y                  | y <sup>++</sup>   | y*          | y <sup>*++</sup> | # |
|---|--------------------|-----------------|-------------|------------------|------|--------------------|-------------------|-------------|------------------|---|
| 1 | 58.028740          | 29.518008       |             |                  | G    |                    |                   |             |                  | 9 |
| 2 | <b>221.092069</b>  | 111.049673      |             |                  | Y    | 1202.696579        | 601.851928        | 1185.670030 | 593.338653       | 8 |
| 3 | <b>334.176133</b>  | 167.591704      |             |                  | I    | <b>1039.633250</b> | 520.320263        | 1022.606701 | 511.806989       | 7 |
| 4 | <b>447.260197</b>  | 224.133737      |             |                  | L    | <b>926.549186</b>  | 463.778231        | 909.522637  | 455.264957       | 6 |
| 5 | <b>546.328611</b>  | 273.667944      |             |                  | V    | <b>813.465122</b>  | 407.236199        | 796.438573  | 398.722925       | 5 |
| 6 | 603.350075         | 302.178676      |             |                  | G    | <b>714.396708</b>  | 357.701992        | 697.370159  | 349.188718       | 4 |
| 7 | <b>1042.575401</b> | 521.791339      | 1025.548852 | 513.278064       | Q    | <b>657.375244</b>  | <b>329.191260</b> | 640.348695  | 320.677986       | 3 |
| 8 | <b>1113.612515</b> | 557.309896      | 1096.585966 | 548.796621       | A    | 218.149918         | 109.578597        | 201.123369  | 101.065322       | 2 |
| 9 |                    |                 |             |                  | K    | 147.112804         | 74.060040         | 130.086255  | 65.546765        | 1 |

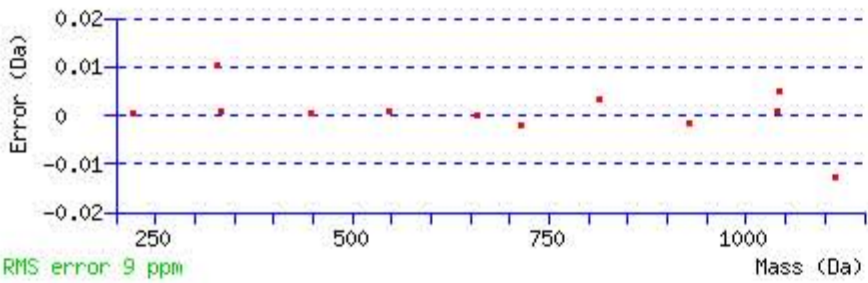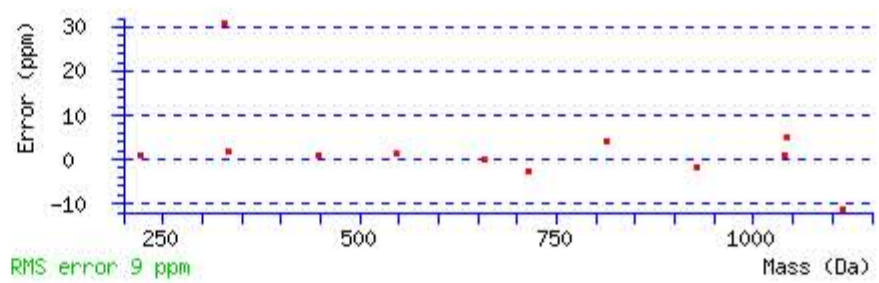

NCBI BLAST search of [GYILVGQAK](#)

(Parameters: blastp, nr protein database, expect=20000, no filter, PAM30)

Other BLAST [web gateways](#)

**All matches to this query**

| Score | Mr(calc):   | Delta     | Sequence                   |
|-------|-------------|-----------|----------------------------|
| 28.4  | 1258.710754 | -0.002086 | <a href="#">GYILVGQAK</a>  |
| 10.4  | 1258.717941 | -0.009273 | <a href="#">RILAKVQEMR</a> |
| 8.6   | 1258.721970 | -0.013302 | <a href="#">GYILQAKR</a>   |

Mascot: <http://www.matrixscience.com/>



# MASCOT SEARCH RESULTS

## Peptide View

MS/MS Fragmentation of **QSSSYSFFK**  
 Found in **C4BPA\_HUMAN**, C4b-binding protein alpha chain OS=Homo sapiens GN=C4BPA PE=1 SV=2

Match to Query 23270: 1390.657968 from(696.336260,2+) rtinseconds(2139) index(32674)  
 Title: Locus:1.1.1.3408.20 File:"2013-07-02 CLN FXIII 180 min 3rd F 3.wiff"  
 Data file C:\Program Files (x86)\Matrix Science\Mascot Daemon\mgf9 FXIII 180 min 3rd\mascot\_daemon\_merge.mgf

Click mouse within plot area to zoom in by factor of two about that point  
 Or, Plot from  to  Da   
 Label all possible matches  Label matches used for scoring

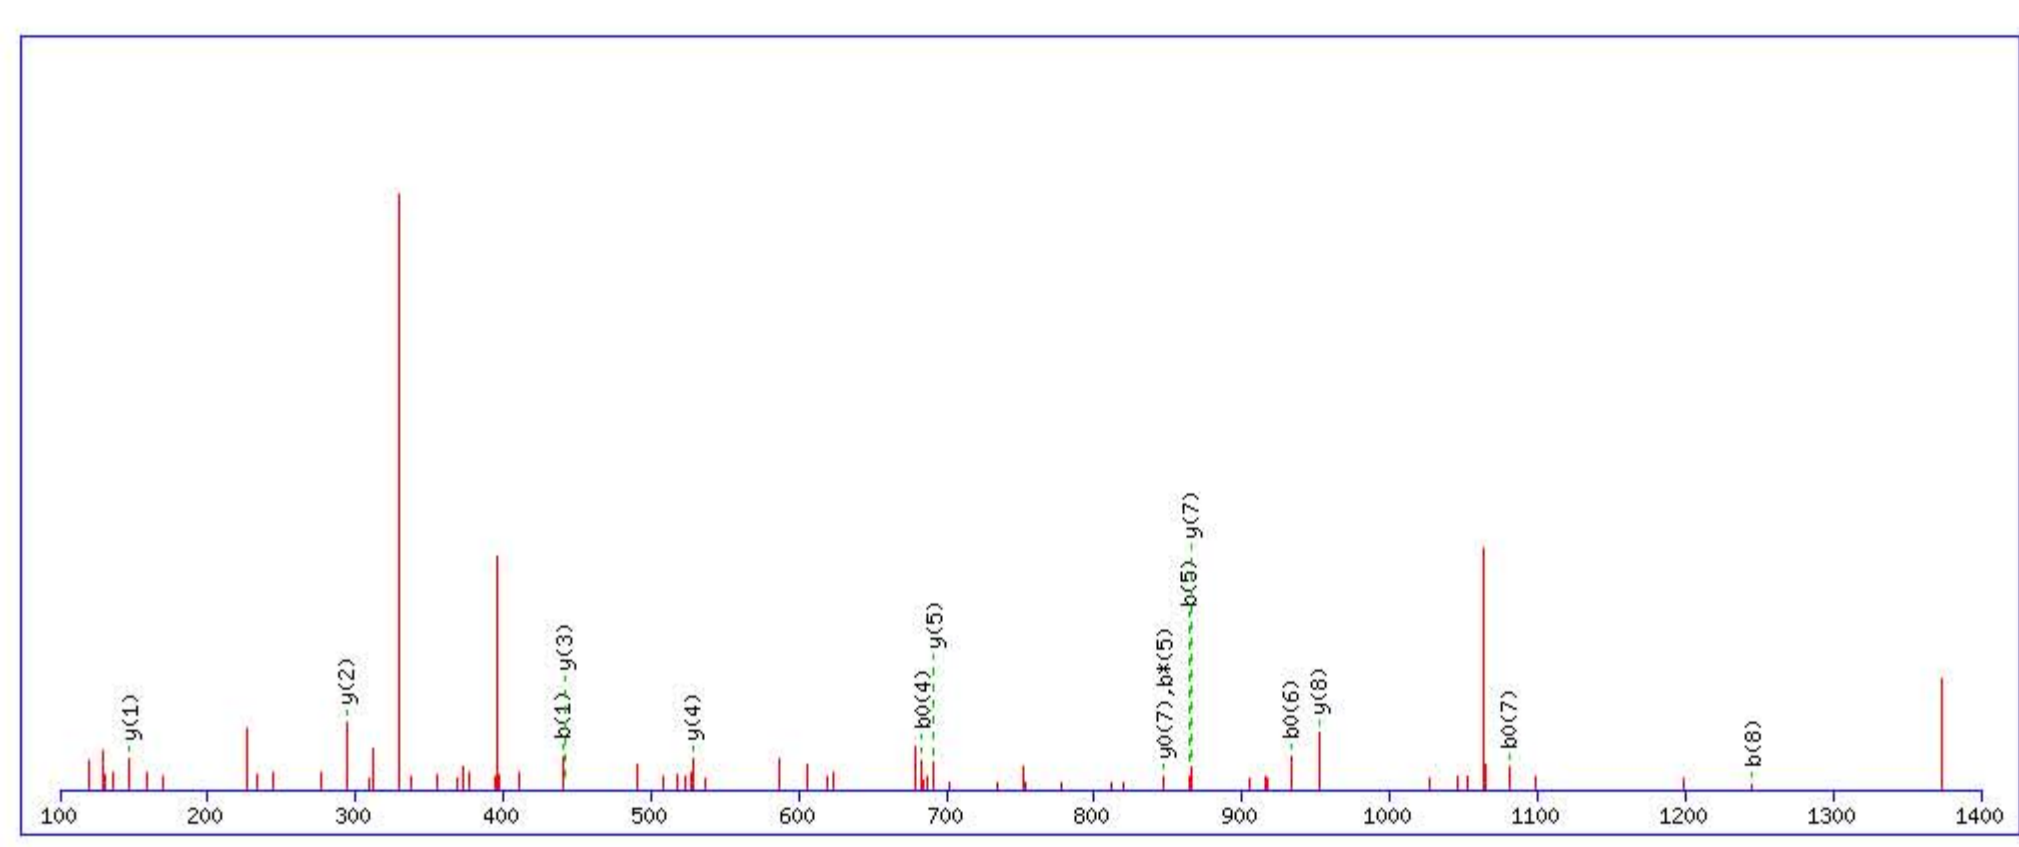

Monoisotopic mass of neutral peptide  $M_r(\text{calc})$ : 1390.659119  
 Fixed modifications: Carbamidomethyl (C) (apply to specified residues or termini only)  
 Variable modifications:  
 Q1 : Biotin:Thermo-21345 (Q)  
 Ions Score: 34 Expect: 0.0029  
 Matches : 15/88 fragment ions using 32 most intense peaks [\(help\)](#)

| # | b                  | b <sup>++</sup> | b <sup>+</sup>    | b <sup>+++</sup> | b <sup>0</sup>     | b <sup>0++</sup> | Seq. | y                 | y <sup>++</sup> | y <sup>+</sup> | y <sup>+++</sup> | y <sup>0</sup>    | y <sup>0++</sup> | # |
|---|--------------------|-----------------|-------------------|------------------|--------------------|------------------|------|-------------------|-----------------|----------------|------------------|-------------------|------------------|---|
| 1 | <b>440.232602</b>  | 220.619939      | 423.206053        | 212.106664       |                    |                  | Q    |                   |                 |                |                  |                   |                  | 9 |
| 2 | 527.264630         | 264.135953      | 510.238081        | 255.622679       | 509.254065         | 255.130671       | S    | <b>952.441073</b> | 476.724175      | 935.414524     | 468.210900       | 934.430508        | 467.718892       | 8 |
| 3 | 614.296658         | 307.651967      | 597.270109        | 299.138692       | 596.286093         | 298.646684       | S    | <b>865.409045</b> | 433.208161      | 848.382496     | 424.694886       | <b>847.398480</b> | 424.202878       | 7 |
| 4 | 701.328686         | 351.167981      | 684.302137        | 342.654706       | <b>683.318121</b>  | 342.162698       | S    | 778.377017        | 389.692147      | 761.350468     | 381.178872       | 760.366452        | 380.686864       | 6 |
| 5 | <b>864.392015</b>  | 432.699645      | <b>847.365466</b> | 424.186371       | 846.381450         | 423.694363       | Y    | <b>691.344989</b> | 346.176133      | 674.318440     | 337.662858       | 673.334424        | 337.170850       | 5 |
| 6 | 951.424043         | 476.215659      | 934.397494        | 467.702385       | <b>933.413478</b>  | 467.210377       | S    | <b>528.281660</b> | 264.644468      | 511.255111     | 256.131194       | 510.271095        | 255.639186       | 4 |
| 7 | 1098.492457        | 549.749866      | 1081.465908       | 541.236592       | <b>1080.481892</b> | 540.744584       | F    | <b>441.249632</b> | 221.128454      | 424.223083     | 212.615180       |                   |                  | 3 |
| 8 | <b>1245.560871</b> | 623.284073      | 1228.534322       | 614.770799       | 1227.550306        | 614.278791       | F    | <b>294.181218</b> | 147.594247      | 277.154669     | 139.080973       |                   |                  | 2 |
| 9 |                    |                 |                   |                  |                    |                  | K    | <b>147.112804</b> | 74.060040       | 130.086255     | 65.546765        |                   |                  | 1 |

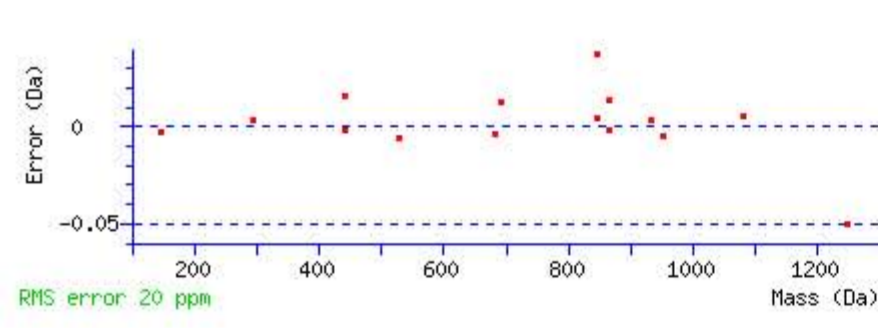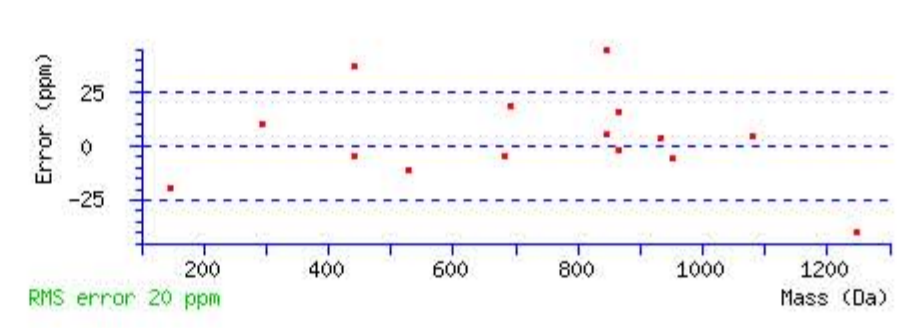

NCBI BLAST search of **QSSSYSFFK**  
 (Parameters: blastp, nr protein database, expect=20000, no filter, PAM30)  
 Other BLAST [web gateways](#)

### All matches to this query

| Score | $M_r(\text{calc})$ : | Delta     | Sequence                     |
|-------|----------------------|-----------|------------------------------|
| 34.0  | 1390.659119          | -0.001151 | <a href="#">QSSSYSFFK</a>    |
| 6.4   | 1390.676208          | -0.018240 | <a href="#">AEKSSSTDQK</a>   |
| 5.9   | 1390.669678          | -0.011710 | <a href="#">CAPASIRLMDNK</a> |
| 4.7   | 1390.655075          | 0.002893  | <a href="#">IHEQDQLYSMK</a>  |
| 3.5   | 1390.676208          | -0.018240 | <a href="#">LTENNSQPLMTK</a> |
| 2.7   | 1390.676208          | -0.018240 | <a href="#">KMVNDAEPDTKK</a> |
| 2.2   | 1390.673721          | -0.015753 | <a href="#">QPNCSSLFK</a>    |
| 1.6   | 1390.673706          | -0.015738 | <a href="#">TLNADLMMFAHK</a> |
| 1.5   | 1390.646317          | 0.011651  | <a href="#">TNELEEELSAEK</a> |
| 0.9   | 1390.664963          | -0.006995 | <a href="#">EEGLEEGLQMK</a>  |

# MASCOT Search Results

## Peptide View

MS/MS Fragmentation of **LNNGEITQHR**

Found in **C4BPA\_HUMAN**, C4b-binding protein alpha chain OS=Homo sapiens GN=C4BPA PE=1 SV=2

Match to Query 26949: 1491.761082 from(498.260970,3+) rtinseconds(1445) index(28470)

Title: Locus:1.1.1.3166.6 File:"2013-07-02 CLN FXIII 180 min 3rd F 3.wiff"

Data file C:\Program Files (x86)\Matrix Science\Mascot Daemon\mgf9 FXIII 180 min 3rd\mascot\_daemon\_merge.mgf

Click mouse within plot area to zoom in by factor of two about that point

Or, Plot from  to  Da

Label all possible matches  Label matches used for scoring

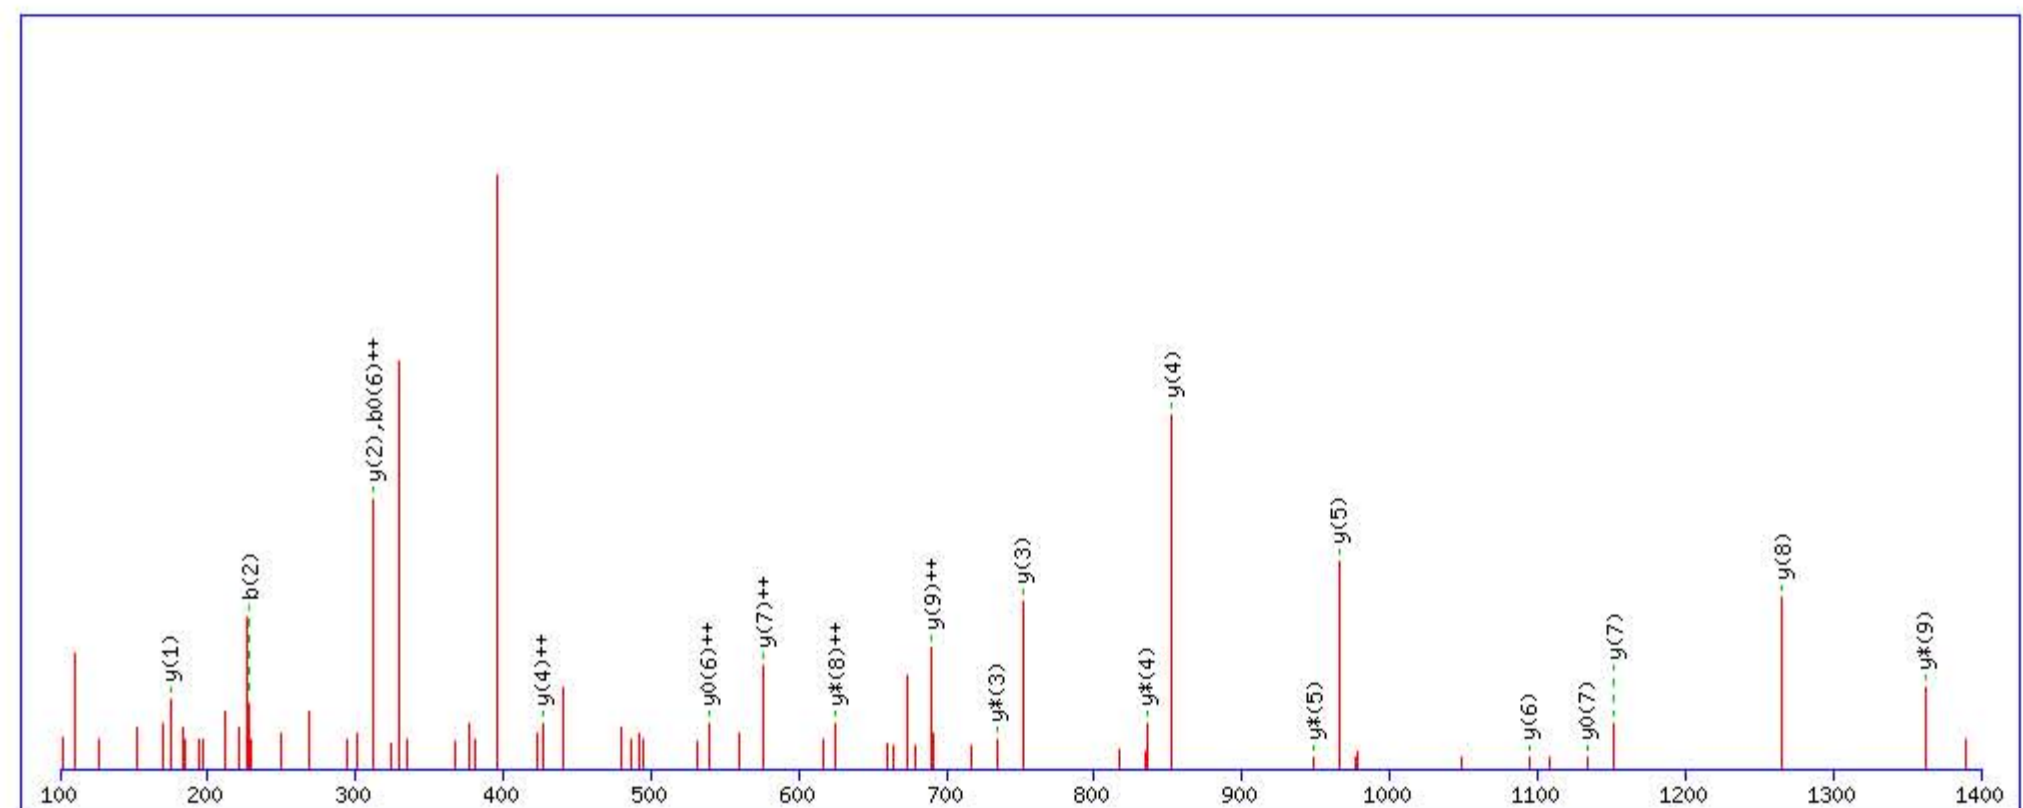

Monoisotopic mass of neutral peptide  $M_r(\text{calc})$ : 1491.761612

Fixed modifications: Carbamidomethyl (C) (apply to specified residues or termini only)

Variable modifications:

Q8 : Biotin:Thermo-21345 (Q)

Ions Score: 44 Expect: 0.00013

Matches : 20/92 fragment ions using 35 most intense peaks [\(help\)](#)

| #  | b           | b <sup>++</sup> | b <sup>*</sup> | b <sup>*++</sup> | b <sup>0</sup> | b <sup>0++</sup> | Seq. | y           | y <sup>++</sup> | y <sup>*</sup> | y <sup>*++</sup> | y <sup>0</sup> | y <sup>0++</sup> | #  |
|----|-------------|-----------------|----------------|------------------|----------------|------------------|------|-------------|-----------------|----------------|------------------|----------------|------------------|----|
| 1  | 114.091340  | 57.549308       |                |                  |                |                  | L    |             |                 |                |                  |                |                  | 10 |
| 2  | 228.134267  | 114.570771      | 211.107718     | 106.057497       |                |                  | N    | 1379.684844 | 690.346060      | 1362.658295    | 681.832786       | 1361.674279    | 681.340778       | 9  |
| 3  | 342.177194  | 171.592235      | 325.150645     | 163.078960       |                |                  | N    | 1265.641917 | 633.324596      | 1248.615368    | 624.811322       | 1247.631352    | 624.319314       | 8  |
| 4  | 399.198658  | 200.102967      | 382.172109     | 191.589692       |                |                  | G    | 1151.598990 | 576.303133      | 1134.572441    | 567.789859       | 1133.588425    | 567.297850       | 7  |
| 5  | 528.241251  | 264.624264      | 511.214702     | 256.110989       | 510.230686     | 255.618981       | E    | 1094.577526 | 547.792401      | 1077.550977    | 539.279127       | 1076.566961    | 538.787119       | 6  |
| 6  | 641.325315  | 321.166296      | 624.298766     | 312.653021       | 623.314750     | 312.161013       | I    | 965.534933  | 483.271105      | 948.508384     | 474.757830       | 947.524368     | 474.265822       | 5  |
| 7  | 742.372994  | 371.690135      | 725.346445     | 363.176861       | 724.362429     | 362.684853       | T    | 852.450869  | 426.729073      | 835.424320     | 418.215798       | 834.440304     | 417.723790       | 4  |
| 8  | 1181.598320 | 591.302798      | 1164.571771    | 582.789524       | 1163.587755    | 582.297516       | Q    | 751.403190  | 376.205233      | 734.376641     | 367.691959       |                |                  | 3  |
| 9  | 1318.657232 | 659.832254      | 1301.630683    | 651.318980       | 1300.646667    | 650.826972       | H    | 312.177864  | 156.592570      | 295.151315     | 148.079295       |                |                  | 2  |
| 10 |             |                 |                |                  |                |                  | R    | 175.118952  | 88.063114       | 158.092403     | 79.549839        |                |                  | 1  |

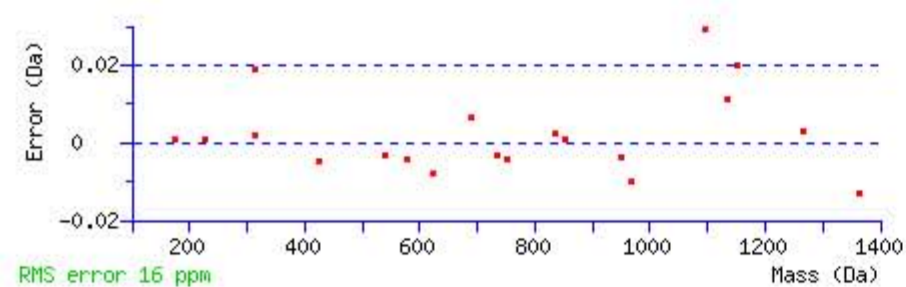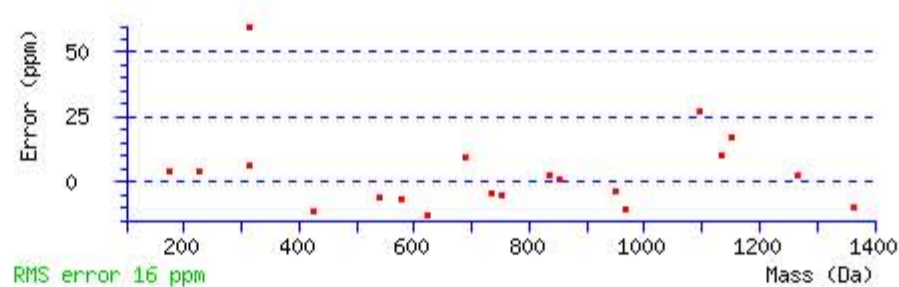

NCBI BLAST search of **LNNGEITQHR**

(Parameters: blastp, nr protein database, expect=20000, no filter, PAM30)

Other BLAST [web gateways](#)

All matches to this query

| Score | $M_r(\text{calc})$ : | Delta     | Sequence                       |
|-------|----------------------|-----------|--------------------------------|
| 44.2  | 1491.761612          | -0.000530 | <a href="#">LNNGEITQHR</a>     |
| 2.7   | 1491.756927          | 0.004155  | <a href="#">IEEVIGTGSFGEVR</a> |

# MASCOT Search Results

## Peptide View

MS/MS Fragmentation of **FSAICQGDGTWSPR**

Found in **C4BPA\_HUMAN**, C4b-binding protein alpha chain OS=Homo sapiens GN=C4BPA PE=1 SV=2

Match to Query 37298: 1891.870092 from(631.630640,3+) rtinseconds(2153) index(32753)

Title: Locus:1.1.1.3413.7 File:"2013-07-02 CLN FXIII 180 min 3rd F 3.wiff"

Data file C:\Program Files (x86)\Matrix Science\Mascot Daemon\mgf\9 FXIII 180 min 3rd\mascot\_daemon\_merge.mgf

Click mouse within plot area to zoom in by factor of two about that point

Or, Plot from  to  Da

Label all possible matches  Label matches used for scoring

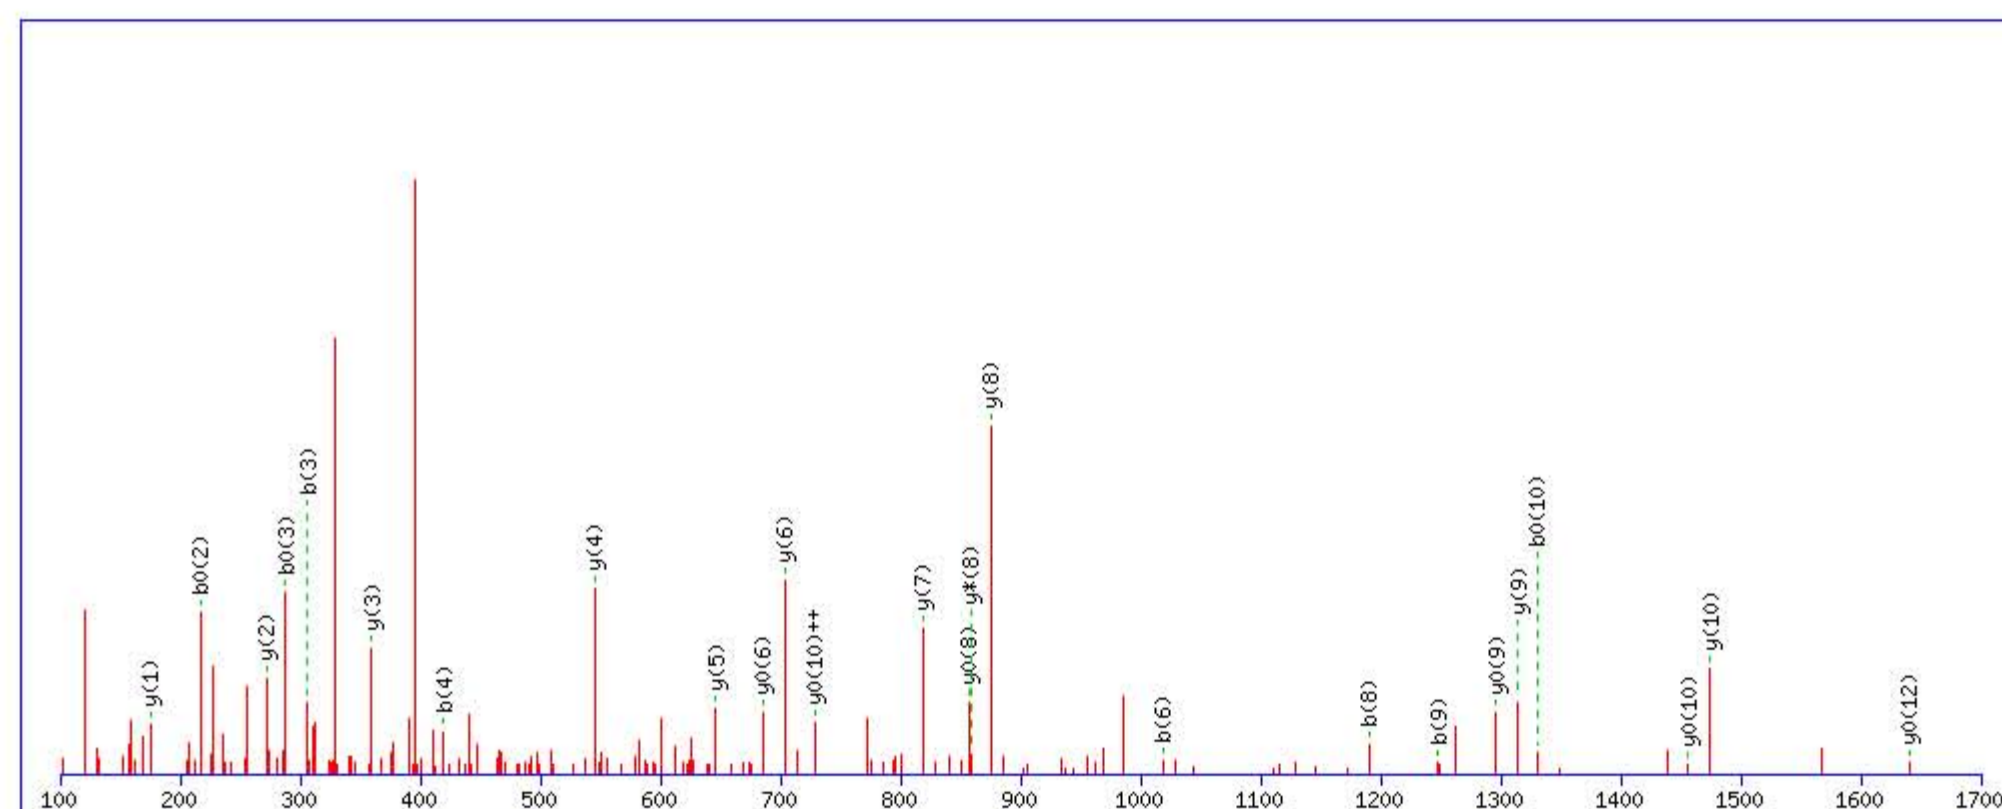

Monoisotopic mass of neutral peptide Mr(calc): 1891.870941

Fixed modifications: Carbamidomethyl (C) (apply to specified residues or termini only)

Variable modifications:

Q6 : Biotin:Thermo-21345 (Q)

Ions Score: 46 Expect: 0.00035

Matches : 25/140 fragment ions using 56 most intense peaks [\(help\)](#)

| #  | b           | b <sup>++</sup> | b <sup>*</sup> | b <sup>*++</sup> | b <sup>0</sup> | b <sup>0++</sup> | Seq. | y           | y <sup>++</sup> | y <sup>*</sup> | y <sup>*++</sup> | y <sup>0</sup> | y <sup>0++</sup> | #  |
|----|-------------|-----------------|----------------|------------------|----------------|------------------|------|-------------|-----------------|----------------|------------------|----------------|------------------|----|
| 1  | 148.075690  | 74.541483       |                |                  |                |                  | F    |             |                 |                |                  |                |                  | 14 |
| 2  | 235.107718  | 118.057497      |                |                  | 217.097153     | 109.052214       | S    | 1745.809788 | 873.408532      | 1728.783239    | 864.895258       | 1727.799223    | 864.403250       | 13 |
| 3  | 306.144832  | 153.576054      |                |                  | 288.134267     | 144.570772       | A    | 1658.777760 | 829.892518      | 1641.751211    | 821.379244       | 1640.767195    | 820.887236       | 12 |
| 4  | 419.228896  | 210.118086      |                |                  | 401.218331     | 201.112804       | I    | 1587.740646 | 794.373961      | 1570.714097    | 785.860687       | 1569.730081    | 785.368678       | 11 |
| 5  | 579.259545  | 290.133411      |                |                  | 561.248980     | 281.128128       | C    | 1474.656582 | 737.831929      | 1457.630033    | 729.318655       | 1456.646017    | 728.826647       | 10 |
| 6  | 1018.484871 | 509.746074      | 1001.458322    | 501.232799       | 1000.474306    | 500.740791       | Q    | 1314.625933 | 657.816605      | 1297.599384    | 649.303330       | 1296.615368    | 648.811322       | 9  |
| 7  | 1075.506335 | 538.256806      | 1058.479786    | 529.743531       | 1057.495770    | 529.251523       | G    | 875.400607  | 438.203942      | 858.374058     | 429.690667       | 857.390042     | 429.198659       | 8  |
| 8  | 1190.533278 | 595.770277      | 1173.506729    | 587.257003       | 1172.522713    | 586.764995       | D    | 818.379143  | 409.693210      | 801.352594     | 401.179935       | 800.368578     | 400.687927       | 7  |
| 9  | 1247.554742 | 624.281009      | 1230.528193    | 615.767735       | 1229.544177    | 615.275727       | G    | 703.352200  | 352.179738      | 686.325651     | 343.666464       | 685.341635     | 343.174456       | 6  |
| 10 | 1348.602421 | 674.804849      | 1331.575872    | 666.291574       | 1330.591856    | 665.799566       | T    | 646.330736  | 323.669006      | 629.304187     | 315.155732       | 628.320171     | 314.663724       | 5  |
| 11 | 1534.681734 | 767.844505      | 1517.655185    | 759.331231       | 1516.671169    | 758.839223       | W    | 545.283057  | 273.145167      | 528.256508     | 264.631892       | 527.272492     | 264.139884       | 4  |
| 12 | 1621.713762 | 811.360519      | 1604.687213    | 802.847245       | 1603.703197    | 802.355237       | S    | 359.203744  | 180.105510      | 342.177195     | 171.592236       | 341.193179     | 171.100228       | 3  |
| 13 | 1718.766526 | 859.886901      | 1701.739977    | 851.373627       | 1700.755961    | 850.881619       | P    | 272.171716  | 136.589496      | 255.145167     | 128.076221       |                |                  | 2  |
| 14 |             |                 |                |                  |                |                  | R    | 175.118952  | 88.063114       | 158.092403     | 79.549839        |                |                  | 1  |

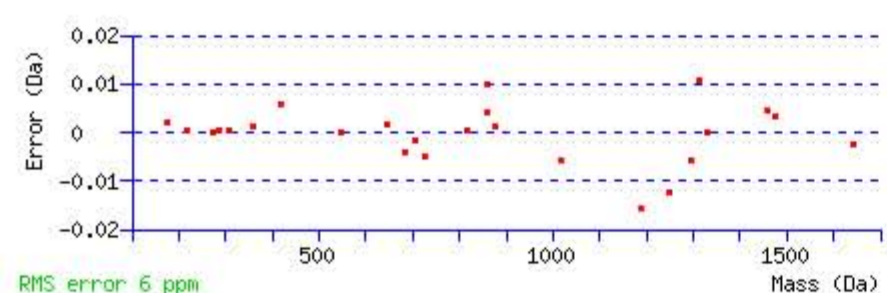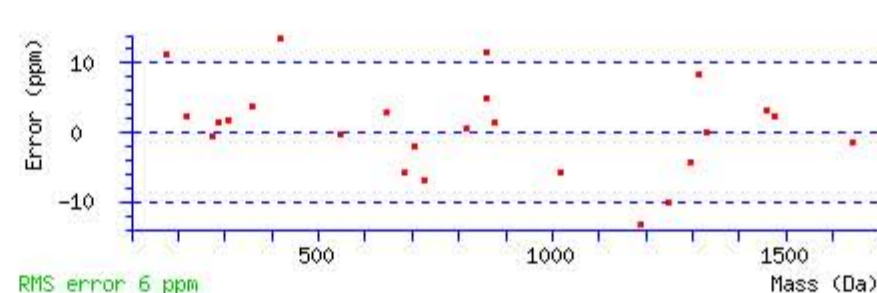

NCBI BLAST search of [FSAICQGDGTWSPR](#)

(Parameters: blastp, nr protein database, expect=20000, no filter, PAM30)

Other BLAST [web gateways](#)

### All matches to this query

| Score | Mr(calc):   | Delta     | Sequence                       |
|-------|-------------|-----------|--------------------------------|
| 45.6  | 1891.870941 | -0.000849 | <a href="#">FSAICQGDGTWSPR</a> |

Mascot: <http://www.matrixscience.com/>

# MATRIX SCIENCE Mascot Search Results

## Peptide View

MS/MS Fragmentation of **GVGWSHPLPQCEIVK**

Found in **C4BPA\_HUMAN**, C4b-binding protein alpha chain OS=Homo sapiens GN=C4BPA PE=1 SV=2

Match to Query 40161: 2017.025472 from(673.349100,3+) rtinseconds(2101) index(32458)

Title: Locus:1.1.1.3395.10 File:"2013-07-02 CLN FXIII 180 min 3rd F 3.wiff"

Data file C:\Program Files (x86)\Matrix Science\Mascot Daemon\mgf\9 FXIII 180 min 3rd\mascot\_daemon\_merge.mgf

Click mouse within plot area to zoom in by factor of two about that point

Or, Plot from  to  Da

Label all possible matches  Label matches used for scoring

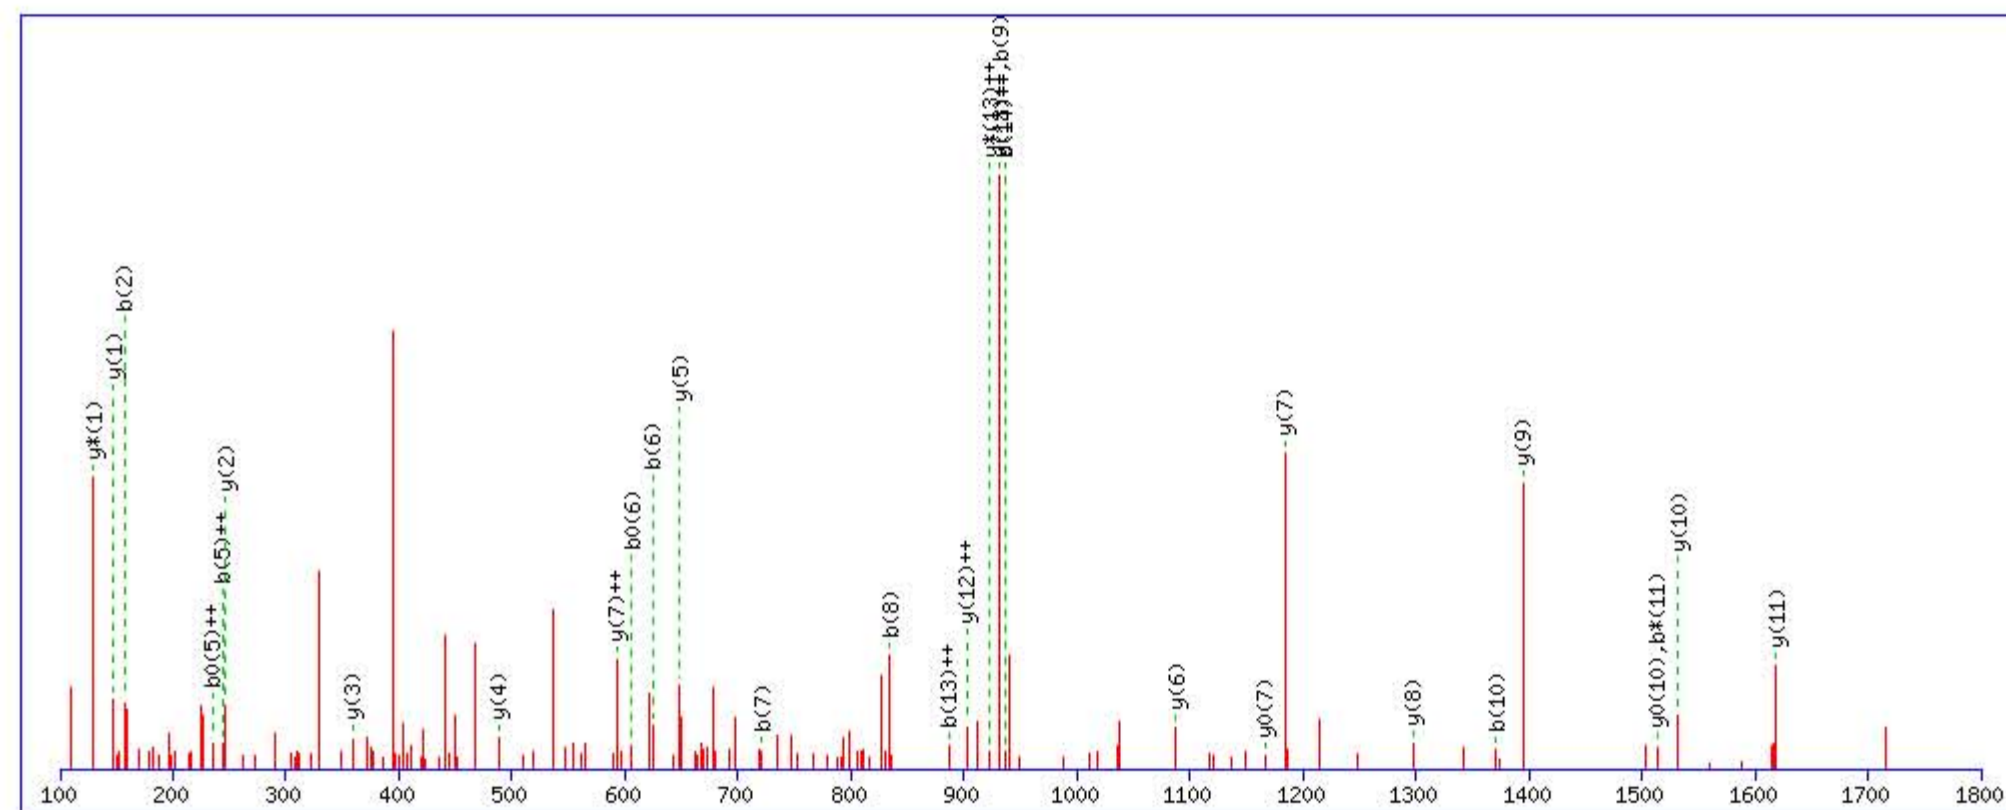

Monoisotopic mass of neutral peptide Mr(calc): 2017.027771

Fixed modifications: Carbamidomethyl (C) (apply to specified residues or termini only)

Variable modifications:

Q10 : Biotin:Thermo-21345 (Q)

Ions Score: 37 Expect: 0.0061

Matches : 30/136 fragment ions using 83 most intense peaks [\(help\)](#)

| #  | b                  | b <sup>++</sup>   | b <sup>*</sup>     | b <sup>*++</sup> | b <sup>0</sup> | b <sup>0++</sup>  | Seq. | y                  | y <sup>++</sup>   | y <sup>*</sup>    | y <sup>*++</sup>  | y <sup>0</sup>     | y <sup>0++</sup> | #  |
|----|--------------------|-------------------|--------------------|------------------|----------------|-------------------|------|--------------------|-------------------|-------------------|-------------------|--------------------|------------------|----|
| 1  | 58.028740          | 29.518008         |                    |                  |                |                   | G    |                    |                   |                   |                   |                    |                  | 15 |
| 2  | <b>157.097154</b>  | 79.052215         |                    |                  |                |                   | V    | 1961.013573        | 981.010425        | 1943.987024       | 972.497150        | 1943.003008        | 972.005142       | 14 |
| 3  | 214.118618         | 107.562947        |                    |                  |                |                   | G    | 1861.945159        | <b>931.476217</b> | 1844.918610       | <b>922.962943</b> | 1843.934594        | 922.470935       | 13 |
| 4  | 400.197931         | 200.602603        |                    |                  |                |                   | W    | 1804.923695        | <b>902.965486</b> | 1787.897146       | 894.452211        | 1786.913130        | 893.960203       | 12 |
| 5  | 487.229959         | <b>244.118617</b> |                    |                  | 469.219394     | <b>235.113335</b> | S    | <b>1618.844382</b> | 809.925829        | 1601.817833       | 801.412555        | 1600.833817        | 800.920547       | 11 |
| 6  | <b>624.288871</b>  | 312.648074        |                    |                  |                | <b>606.278306</b> | H    | <b>1531.812354</b> | 766.409815        | 1514.785805       | 757.896541        | <b>1513.801789</b> | 757.404532       | 10 |
| 7  | <b>721.341635</b>  | 361.174456        |                    |                  | 703.331070     | 352.169173        | P    | <b>1394.753442</b> | 697.880359        | 1377.726893       | 689.367085        | 1376.742877        | 688.875076       | 9  |
| 8  | <b>834.425699</b>  | 417.716488        |                    |                  | 816.415134     | 408.711205        | L    | <b>1297.700678</b> | 649.353977        | 1280.674129       | 640.840703        | 1279.690113        | 640.348694       | 8  |
| 9  | <b>931.478463</b>  | 466.242870        |                    |                  | 913.467898     | 457.237587        | P    | <b>1184.616614</b> | <b>592.811945</b> | 1167.590065       | 584.298670        | <b>1166.606049</b> | 583.806662       | 7  |
| 10 | <b>1370.703789</b> | 685.855532        | 1353.677240        | 677.342258       | 1352.693224    | 676.850250        | Q    | <b>1087.563850</b> | 544.285563        | 1070.537301       | 535.772288        | 1069.553285        | 535.280280       | 6  |
| 11 | 1530.734438        | 765.870857        | <b>1513.707889</b> | 757.357583       | 1512.723873    | 756.865574        | C    | <b>648.338524</b>  | 324.672900        | 631.311975        | 316.159626        | 630.327959         | 315.667618       | 5  |
| 12 | 1659.777031        | 830.392153        | 1642.750482        | 821.878879       | 1641.766466    | 821.386871        | E    | <b>488.307875</b>  | 244.657575        | 471.281326        | 236.144301        | 470.297310         | 235.652293       | 4  |
| 13 | 1772.861095        | <b>886.934185</b> | 1755.834546        | 878.420911       | 1754.850530    | 877.928903        | I    | <b>359.265282</b>  | 180.136279        | 342.238733        | 171.623004        |                    |                  | 3  |
| 14 | 1871.929509        | <b>936.468392</b> | 1854.902960        | 927.955118       | 1853.918944    | 927.463110        | V    | <b>246.181218</b>  | 123.594247        | 229.154669        | 115.080973        |                    |                  | 2  |
| 15 |                    |                   |                    |                  |                |                   | K    | <b>147.112804</b>  | 74.060040         | <b>130.086255</b> | 65.546765         |                    |                  | 1  |

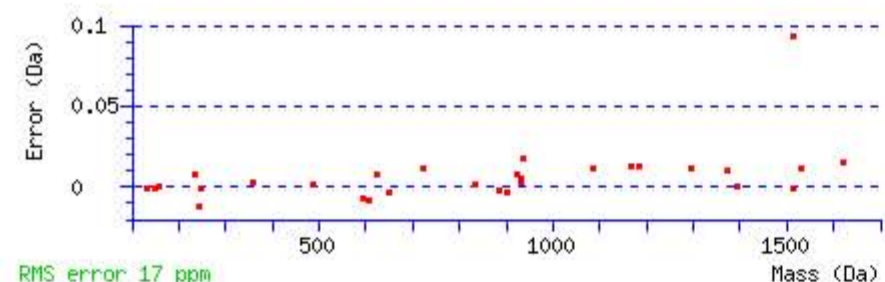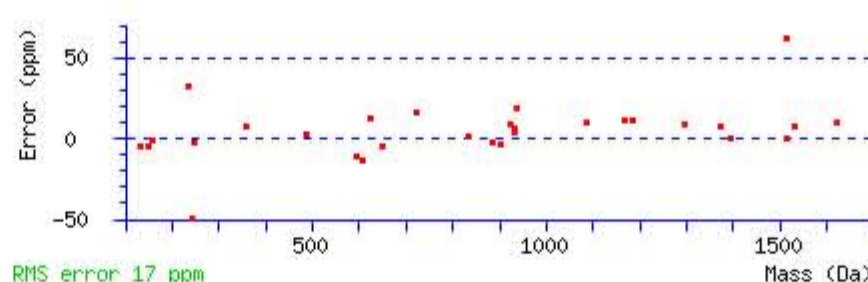

NCBI BLAST search of **GVGWSHPLPQCEIVK**

(Parameters: blastp, nr protein database, expect=20000, no filter, PAM30)

Other BLAST [web gateways](#)

All matches to this query

| Score | Mr(calc):   | Delta     | Sequence                        |
|-------|-------------|-----------|---------------------------------|
| 37.1  | 2017.027771 | -0.002299 | <a href="#">GVGWSHPLPQCEIVK</a> |

Mascot: <http://www.matrixscience.com/>

# MASCOT Search Results

## Peptide View

MS/MS Fragmentation of **LSCSYSHWSAPAPQCK**

Found in **C4BPA\_HUMAN**, C4b-binding protein alpha chain OS=Homo sapiens GN=C4BPA PE=1 SV=2

Match to Query 43071: 2188.980522 from(730.667450,3+) rtinseconds(1778) index(30448)

Title: Locus:1.1.1.3282.22 File:"2013-07-02 CLN FXIII 180 min 3rd F 3.wiff"

Data file C:\Program Files (x86)\Matrix Science\Mascot Daemon\mgf\9 FXIII 180 min 3rd\mascot\_daemon\_merge.mgf

Click mouse within plot area to zoom in by factor of two about that point

Or, Plot from  to  Da

Label all possible matches  Label matches used for scoring

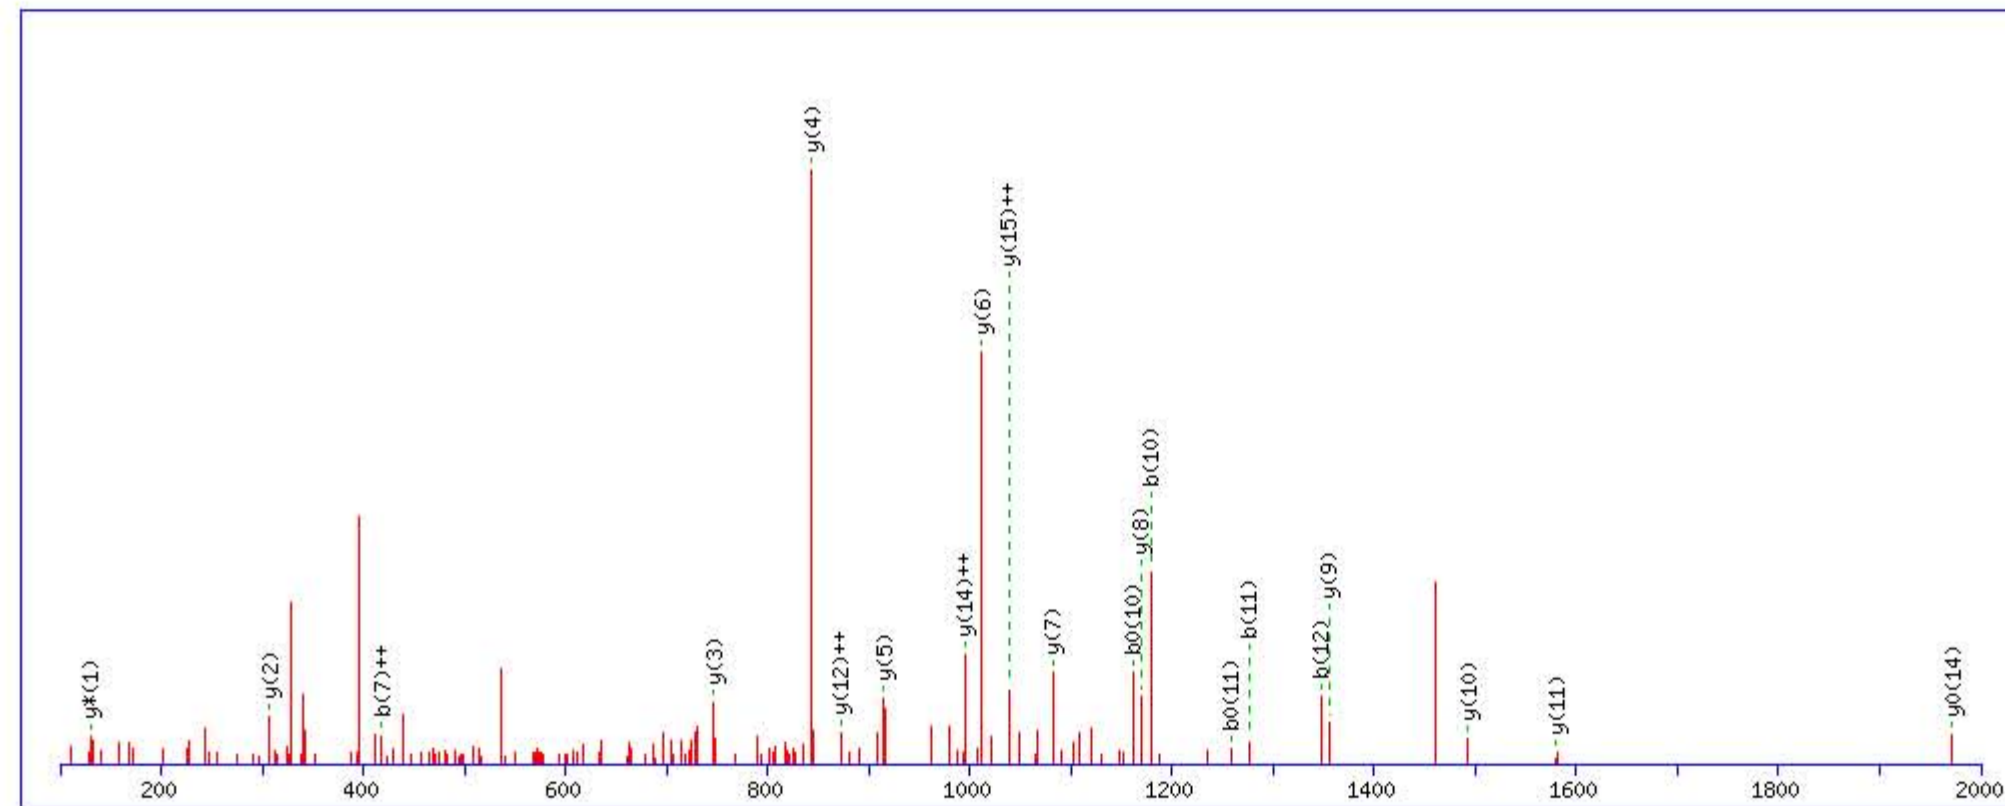

Monoisotopic mass of neutral peptide Mr(calc): 2188.985626

Fixed modifications: Carbamidomethyl (C) (apply to specified residues or termini only)

Variable modifications:

Q14 : Biotin:Thermo-21345 (Q)

Ions Score: 48 Expect: 0.00016

Matches : 21/138 fragment ions using 44 most intense peaks [\(help\)](#)

| #  | b           | b <sup>++</sup> | b <sup>*</sup> | b <sup>+++</sup> | b <sup>0</sup> | b <sup>0++</sup> | Seq. | y           | y <sup>++</sup> | y <sup>*</sup> | y <sup>+++</sup> | y <sup>0</sup> | y <sup>0++</sup> | #  |
|----|-------------|-----------------|----------------|------------------|----------------|------------------|------|-------------|-----------------|----------------|------------------|----------------|------------------|----|
| 1  | 114.091340  | 57.549308       |                |                  |                |                  | L    |             |                 |                |                  |                |                  | 16 |
| 2  | 201.123368  | 101.065322      |                |                  | 183.112803     | 92.060039        | S    | 2076.908850 | 1038.958063     | 2059.882301    | 1030.444788      | 2058.898285    | 1029.952780      | 15 |
| 3  | 361.154017  | 181.080647      |                |                  | 343.143452     | 172.075364       | C    | 1989.876822 | 995.442049      | 1972.850273    | 986.928775       | 1971.866257    | 986.436767       | 14 |
| 4  | 448.186045  | 224.596660      |                |                  | 430.175480     | 215.591378       | S    | 1829.846173 | 915.426725      | 1812.819624    | 906.913450       | 1811.835608    | 906.421442       | 13 |
| 5  | 611.249374  | 306.128325      |                |                  | 593.238809     | 297.123043       | Y    | 1742.814145 | 871.910711      | 1725.787596    | 863.397436       | 1724.803580    | 862.905428       | 12 |
| 6  | 698.281402  | 349.644339      |                |                  | 680.270837     | 340.639056       | S    | 1579.750816 | 790.379046      | 1562.724267    | 781.865772       | 1561.740251    | 781.373764       | 11 |
| 7  | 835.340314  | 418.173795      |                |                  | 817.329749     | 409.168512       | H    | 1492.718788 | 746.863032      | 1475.692239    | 738.349758       | 1474.708223    | 737.857750       | 10 |
| 8  | 1021.419627 | 511.213452      |                |                  | 1003.409062    | 502.208169       | W    | 1355.659876 | 678.333576      | 1338.633327    | 669.820302       | 1337.649311    | 669.328294       | 9  |
| 9  | 1108.451655 | 554.729466      |                |                  | 1090.441090    | 545.724183       | S    | 1169.580563 | 585.293920      | 1152.554014    | 576.780645       | 1151.569998    | 576.288637       | 8  |
| 10 | 1179.488769 | 590.248023      |                |                  | 1161.478204    | 581.242740       | A    | 1082.548535 | 541.777906      | 1065.521986    | 533.264631       |                |                  | 7  |
| 11 | 1276.541533 | 638.774405      |                |                  | 1258.530968    | 629.769122       | P    | 1011.511421 | 506.259349      | 994.484872     | 497.746074       |                |                  | 6  |
| 12 | 1347.578647 | 674.292962      |                |                  | 1329.568082    | 665.287679       | A    | 914.458657  | 457.732967      | 897.432108     | 449.219692       |                |                  | 5  |
| 13 | 1444.631411 | 722.819344      |                |                  | 1426.620846    | 713.814061       | P    | 843.421543  | 422.214410      | 826.394994     | 413.701135       |                |                  | 4  |
| 14 | 1883.856737 | 942.432007      | 1866.830188    | 933.918732       | 1865.846172    | 933.426724       | Q    | 746.368779  | 373.688028      | 729.342230     | 365.174753       |                |                  | 3  |
| 15 | 2043.887386 | 1022.447331     | 2026.860837    | 1013.934057      | 2025.876821    | 1013.442049      | C    | 307.143453  | 154.075365      | 290.116904     | 145.562090       |                |                  | 2  |
| 16 |             |                 |                |                  |                |                  | K    | 147.112804  | 74.060040       | 130.086255     | 65.546766        |                |                  | 1  |

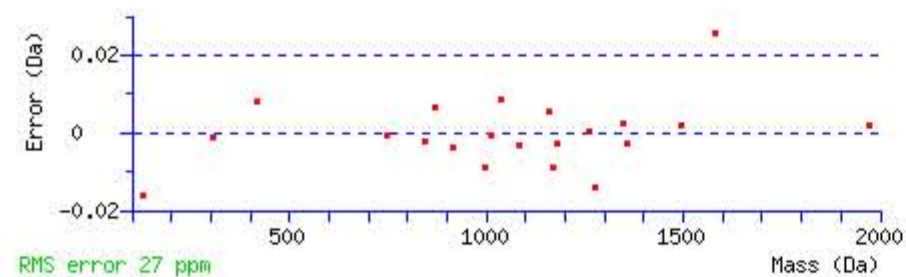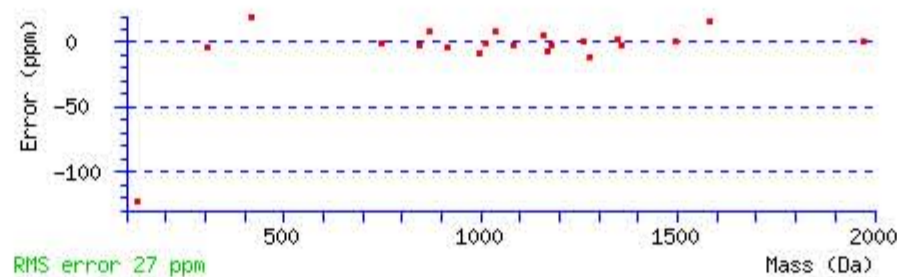

NCBI BLAST search of **LSCSYSHWSAPAPQCK**

(Parameters: blastp, nr protein database, expect=20000, no filter, PAM30)

Other BLAST [web gateways](#)

All matches to this query

| Score | Mr(calc):   | Delta     | Sequence                         |
|-------|-------------|-----------|----------------------------------|
| 47.7  | 2188.985626 | -0.005104 | <a href="#">LSCSYSHWSAPAPQCK</a> |

Mascot: <http://www.matrixscience.com/>

**Peptide View**

MS/MS Fragmentation of **WTPYQGCEALCCPEPK**  
 Found in **C4BPA\_HUMAN**, C4b-binding protein alpha chain OS=Homo sapiens GN=C4BPA PE=1 SV=2

Match to Query 45205: 2305.997022 from(769.672950,3+) rtinseconds(2122) index(32586)  
 Title: Locus:1.1.1.3402.16 File:"2013-07-02 CLN FXIII 180 min 3rd F 3.wiff"  
 Data file C:\Program Files (x86)\Matrix Science\Mascot Daemon\mgf\9 FXIII 180 min 3rd\mascot\_daemon\_merge.mgf

Click mouse within plot area to zoom in by factor of two about that point  
 Or, Plot from  to  Da   
 Label all possible matches  Label matches used for scoring

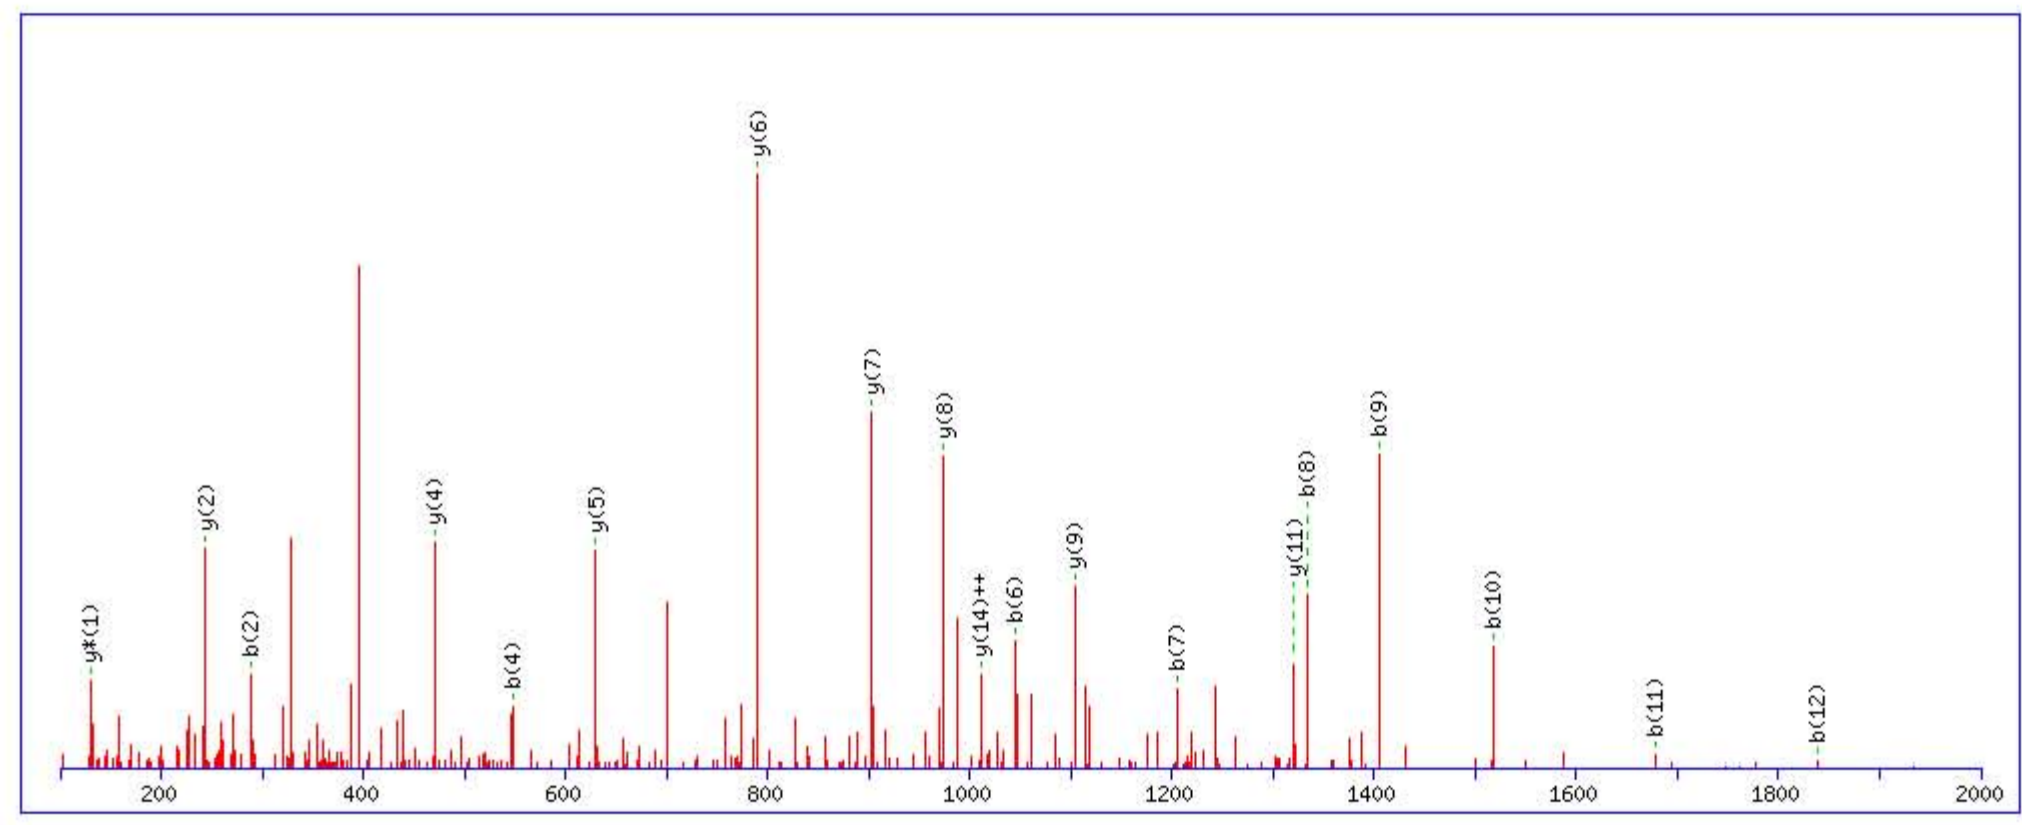

Monoisotopic mass of neutral peptide Mr(calc): 2305.999237  
 Fixed modifications: Carbamidomethyl (C) (apply to specified residues or termini only)  
 Variable modifications:  
 Q5 : Biotin:Thermo-21345 (Q)  
 Ions Score: 48 Expect: 5.9e-005  
 Matches : 19/166 fragment ions using 37 most intense peaks [\(help\)](#)

| #  | b                  | b <sup>++</sup> | b <sup>*</sup> | b <sup>+++</sup> | b <sup>0</sup> | b <sup>0++</sup> | Seq. | y                  | y <sup>++</sup>    | y <sup>*</sup>    | y <sup>+++</sup> | y <sup>0</sup> | y <sup>0++</sup> | #  |
|----|--------------------|-----------------|----------------|------------------|----------------|------------------|------|--------------------|--------------------|-------------------|------------------|----------------|------------------|----|
| 1  | 187.086589         | 94.046932       |                |                  |                |                  | W    |                    |                    |                   |                  |                |                  | 16 |
| 2  | <b>288.134268</b>  | 144.570772      |                |                  | 270.123703     | 135.565490       | T    | 2120.927205        | 1060.967240        | 2103.900656       | 1052.453966      | 2102.916640    | 1051.961958      | 15 |
| 3  | 385.187032         | 193.097154      |                |                  | 367.176467     | 184.091872       | P    | 2019.879526        | <b>1010.443401</b> | 2002.852977       | 1001.930127      | 2001.868961    | 1001.438119      | 14 |
| 4  | <b>548.250361</b>  | 274.628819      |                |                  | 530.239796     | 265.623536       | Y    | 1922.826762        | 961.917019         | 1905.800213       | 953.403745       | 1904.816197    | 952.911737       | 13 |
| 5  | 987.475687         | 494.241482      | 970.449138     | 485.728207       | 969.465122     | 485.236199       | Q    | 1759.763433        | 880.385355         | 1742.736884       | 871.872080       | 1741.752868    | 871.380072       | 12 |
| 6  | <b>1044.497151</b> | 522.752214      | 1027.470602    | 514.238939       | 1026.486586    | 513.746931       | G    | <b>1320.538107</b> | 660.772692         | 1303.511558       | 652.259417       | 1302.527542    | 651.767409       | 11 |
| 7  | <b>1204.527800</b> | 602.767538      | 1187.501251    | 594.254264       | 1186.517235    | 593.762256       | C    | 1263.516643        | 632.261960         | 1246.490094       | 623.748685       | 1245.506078    | 623.256677       | 10 |
| 8  | <b>1333.570393</b> | 667.288835      | 1316.543844    | 658.775560       | 1315.559828    | 658.283552       | E    | <b>1103.485994</b> | 552.246635         | 1086.459445       | 543.733361       | 1085.475429    | 543.241353       | 9  |
| 9  | <b>1404.607507</b> | 702.807392      | 1387.580958    | 694.294117       | 1386.596942    | 693.802109       | A    | <b>974.443401</b>  | 487.725339         | 957.416852        | 479.212064       | 956.432836     | 478.720056       | 8  |
| 10 | <b>1517.691571</b> | 759.349424      | 1500.665022    | 750.836149       | 1499.681006    | 750.344141       | L    | <b>903.406287</b>  | 452.206782         | 886.379738        | 443.693507       | 885.395722     | 443.201499       | 7  |
| 11 | <b>1677.722220</b> | 839.364748      | 1660.695671    | 830.851474       | 1659.711655    | 830.359466       | C    | <b>790.322223</b>  | 395.664750         | 773.295674        | 387.151475       | 772.311658     | 386.659467       | 6  |
| 12 | <b>1837.752869</b> | 919.380073      | 1820.726320    | 910.866798       | 1819.742304    | 910.374790       | C    | <b>630.291574</b>  | 315.649425         | 613.265025        | 307.136151       | 612.281009     | 306.644143       | 5  |
| 13 | 1934.805633        | 967.906455      | 1917.779084    | 959.393180       | 1916.795068    | 958.901172       | P    | <b>470.260925</b>  | 235.634101         | 453.234376        | 227.120826       | 452.250360     | 226.628818       | 4  |
| 14 | 2063.848226        | 1032.427751     | 2046.821677    | 1023.914477      | 2045.837661    | 1023.422469      | E    | 373.208161         | 187.107719         | 356.181612        | 178.594444       | 355.197596     | 178.102436       | 3  |
| 15 | 2160.900990        | 1080.954133     | 2143.874441    | 1072.440858      | 2142.890425    | 1071.948850      | P    | <b>244.165568</b>  | 122.586422         | 227.139019        | 114.073148       |                |                  | 2  |
| 16 |                    |                 |                |                  |                |                  | K    | 147.112804         | 74.060040          | <b>130.086255</b> | 65.546765        |                |                  | 1  |

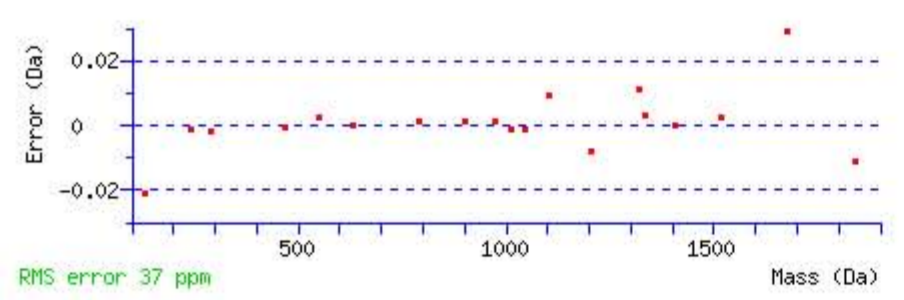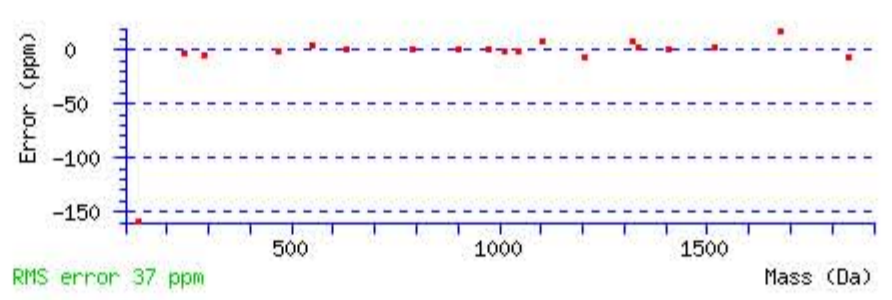

NCBI BLAST search of **WTPYQGCEALCCPEPK**  
 (Parameters: blastp, nr protein database, expect=20000, no filter, PAM30)  
 Other BLAST [web gateways](#)

**All matches to this query**

| Score | Mr(calc):   | Delta     | Sequence                         |
|-------|-------------|-----------|----------------------------------|
| 48.3  | 2305.999237 | -0.002215 | <a href="#">WTPYQGCEALCCPEPK</a> |

# MASCOT Search Results

## Peptide View

MS/MS Fragmentation of **CHPGYKPTTDEPTTVICQK**

Found in **C4BPA\_HUMAN**, C4b-binding protein alpha chain OS=Homo sapiens GN=C4BPA PE=1 SV=2

Match to Query 48975: 2542.189002 from(848.403610,3+) rtinseconds(1629) index(29620)

Title: Locus:1.1.1.3230.20 File:"2013-07-02 CLN FXIII 180 min 3rd F 3.wiff"

Data file C:\Program Files (x86)\Matrix Science\Mascot Daemon\mgf9 FXIII 180 min 3rd\mascot\_daemon\_merge.mgf

Click mouse within plot area to zoom in by factor of two about that point

Or, Plot from  to  Da

Label all possible matches  Label matches used for scoring

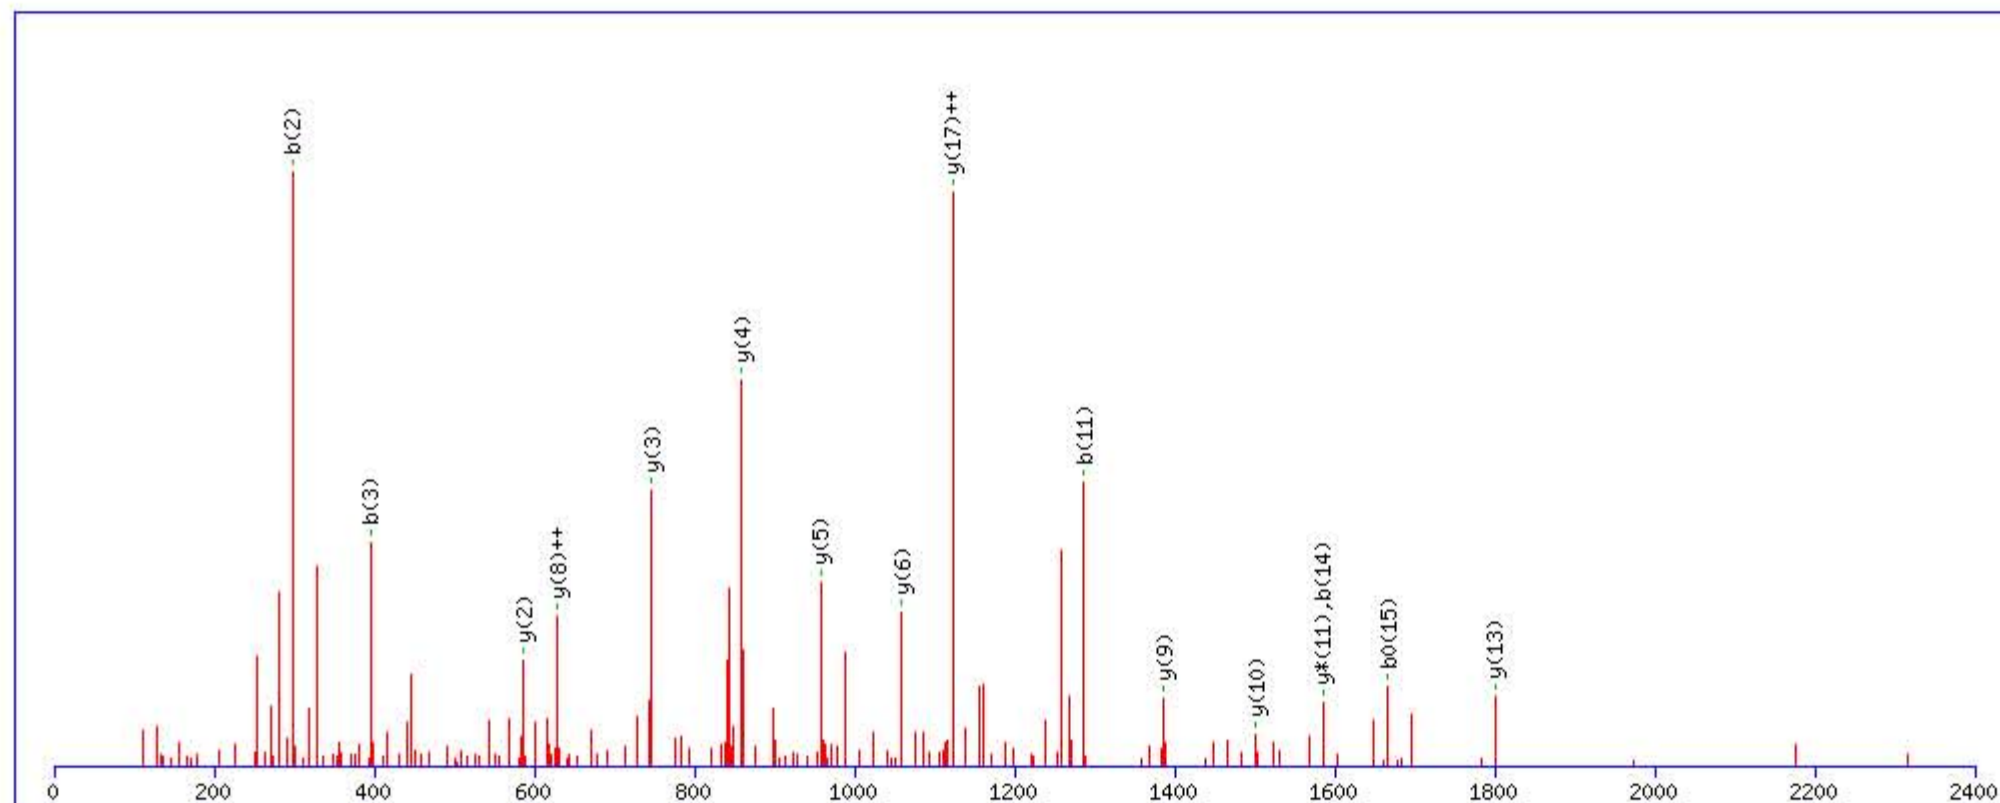

Monoisotopic mass of neutral peptide Mr(calc): 2542.201859

Fixed modifications: Carbamidomethyl (C) (apply to specified residues or termini only)

Variable modifications:

Q18 : Biotin:Thermo-21345 (Q)

Ions Score: 55 Expect: 4.8e-005

Matches : 16/182 fragment ions using 20 most intense peaks [\(help\)](#)

| #  | b                  | b <sup>++</sup> | b <sup>*</sup> | b <sup>*++</sup> | b <sup>0</sup>     | b <sup>0++</sup> | Seq. | y                  | y <sup>++</sup>    | y <sup>*</sup>     | y <sup>*++</sup> | y <sup>0</sup> | y <sup>0++</sup> | #  |
|----|--------------------|-----------------|----------------|------------------|--------------------|------------------|------|--------------------|--------------------|--------------------|------------------|----------------|------------------|----|
| 1  | 161.037925         | 81.022600       |                |                  |                    |                  | C    |                    |                    |                    |                  |                |                  | 19 |
| 2  | <b>298.096837</b>  | 149.552056      |                |                  |                    |                  | H    | 2383.178469        | 1192.092872        | 2366.151920        | 1183.579598      | 2365.167904    | 1183.087590      | 18 |
| 3  | <b>395.149601</b>  | 198.078439      |                |                  |                    |                  | P    | 2246.119557        | <b>1123.563416</b> | 2229.093008        | 1115.050142      | 2228.108992    | 1114.558134      | 17 |
| 4  | 452.171065         | 226.589170      |                |                  |                    |                  | G    | 2149.066793        | 1075.037034        | 2132.040244        | 1066.523760      | 2131.056228    | 1066.031752      | 16 |
| 5  | 615.234394         | 308.120835      |                |                  |                    |                  | Y    | 2092.045329        | 1046.526302        | 2075.018780        | 1038.013028      | 2074.034764    | 1037.521020      | 15 |
| 6  | 743.329357         | 372.168317      | 726.302808     | 363.655042       |                    |                  | K    | 1928.982000        | 964.994638         | 1911.955451        | 956.481364       | 1910.971435    | 955.989356       | 14 |
| 7  | 840.382121         | 420.694699      | 823.355572     | 412.181424       |                    |                  | P    | <b>1800.887037</b> | 900.947157         | 1783.860488        | 892.433882       | 1782.876472    | 891.941874       | 13 |
| 8  | 941.429800         | 471.218538      | 924.403251     | 462.705264       | 923.419235         | 462.213256       | T    | 1703.834273        | 852.420775         | 1686.807724        | 843.907500       | 1685.823708    | 843.415492       | 12 |
| 9  | 1042.477479        | 521.742378      | 1025.450930    | 513.229103       | 1024.466914        | 512.737095       | T    | 1602.786594        | 801.896935         | <b>1585.760045</b> | 793.383661       | 1584.776029    | 792.891653       | 11 |
| 10 | 1157.504422        | 579.255849      | 1140.477873    | 570.742575       | 1139.493857        | 570.250567       | D    | <b>1501.738915</b> | 751.373096         | 1484.712366        | 742.859821       | 1483.728350    | 742.367813       | 10 |
| 11 | <b>1286.547015</b> | 643.777146      | 1269.520466    | 635.263871       | 1268.536450        | 634.771863       | E    | <b>1386.711972</b> | 693.859624         | 1369.685423        | 685.346350       | 1368.701407    | 684.854342       | 9  |
| 12 | 1383.599779        | 692.303528      | 1366.573230    | 683.790253       | 1365.589214        | 683.298245       | P    | 1257.669379        | <b>629.338328</b>  | 1240.642830        | 620.825053       | 1239.658814    | 620.333045       | 8  |
| 13 | 1484.647458        | 742.827367      | 1467.620909    | 734.314093       | 1466.636893        | 733.822085       | T    | 1160.616615        | 580.811946         | 1143.590066        | 572.298671       | 1142.606050    | 571.806663       | 7  |
| 14 | <b>1585.695137</b> | 793.351207      | 1568.668588    | 784.837932       | 1567.684572        | 784.345924       | T    | <b>1059.568936</b> | 530.288106         | 1042.542387        | 521.774832       | 1041.558371    | 521.282824       | 6  |
| 15 | 1684.763551        | 842.885414      | 1667.737002    | 834.372139       | <b>1666.752986</b> | 833.880131       | V    | <b>958.521257</b>  | 479.764267         | 941.494708         | 471.250992       |                |                  | 5  |
| 16 | 1797.847615        | 899.427446      | 1780.821066    | 890.914171       | 1779.837050        | 890.422163       | I    | <b>859.452843</b>  | 430.230060         | 842.426294         | 421.716785       |                |                  | 4  |
| 17 | 1957.878264        | 979.442770      | 1940.851715    | 970.929496       | 1939.867699        | 970.437488       | C    | <b>746.368779</b>  | 373.688028         | 729.342230         | 365.174753       |                |                  | 3  |
| 18 | 2397.103590        | 1199.055433     | 2380.077041    | 1190.542158      | 2379.093025        | 1190.050151      | Q    | <b>586.338130</b>  | 293.672703         | 569.311581         | 285.159429       |                |                  | 2  |
| 19 |                    |                 |                |                  |                    |                  | K    | 147.112804         | 74.060040          | 130.086255         | 65.546765        |                |                  | 1  |

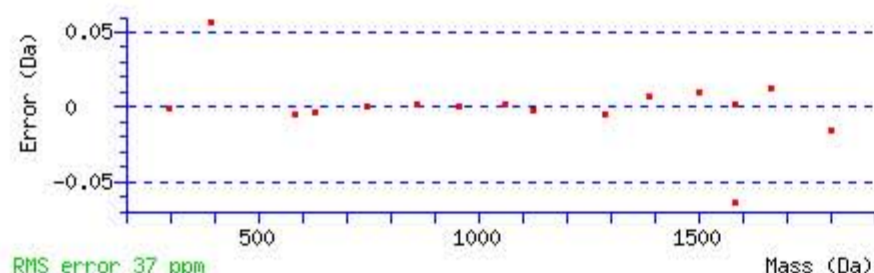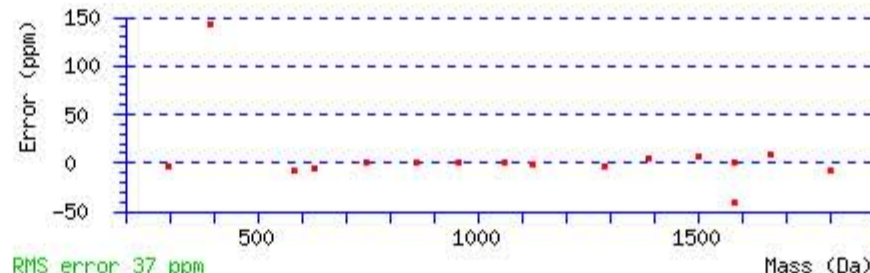

NCBI BLAST search of **CHPGYKPTTDEPTTVICQK**

(Parameters: blastp, nr protein database, expect=20000, no filter, PAM30)

Other BLAST [web gateways](#)

All matches to this query

| Score | Mr(calc):   | Delta     | Sequence                            |
|-------|-------------|-----------|-------------------------------------|
| 55.4  | 2542.201859 | -0.012857 | <a href="#">CHPGYKPTTDEPTTVICQK</a> |

Mascot: <http://www.matrixscience.com/>

# MASCOT Search Results

## Peptide View

MS/MS Fragmentation of **ALLAFQESK**

Found in **C4BPB\_HUMAN**, C4b-binding protein beta chain OS=Homo sapiens GN=C4BPB PE=1 SV=1

Match to Query 20631: 1316.719948 from(659.367250,2+) rtinseconds(2243) index(47506)

Title: Locus:1.1.1.3493.15 File:"2013-07-02 CLN FXIII 180 min 3rd F 4.wiff"

Data file C:\Program Files (x86)\Matrix Science\Mascot Daemon\mgf\9 FXIII 180 min 3rd\mascot\_daemon\_merge.mgf

Click mouse within plot area to zoom in by factor of two about that point

Or, Plot from  to  Da

Label all possible matches  Label matches used for scoring

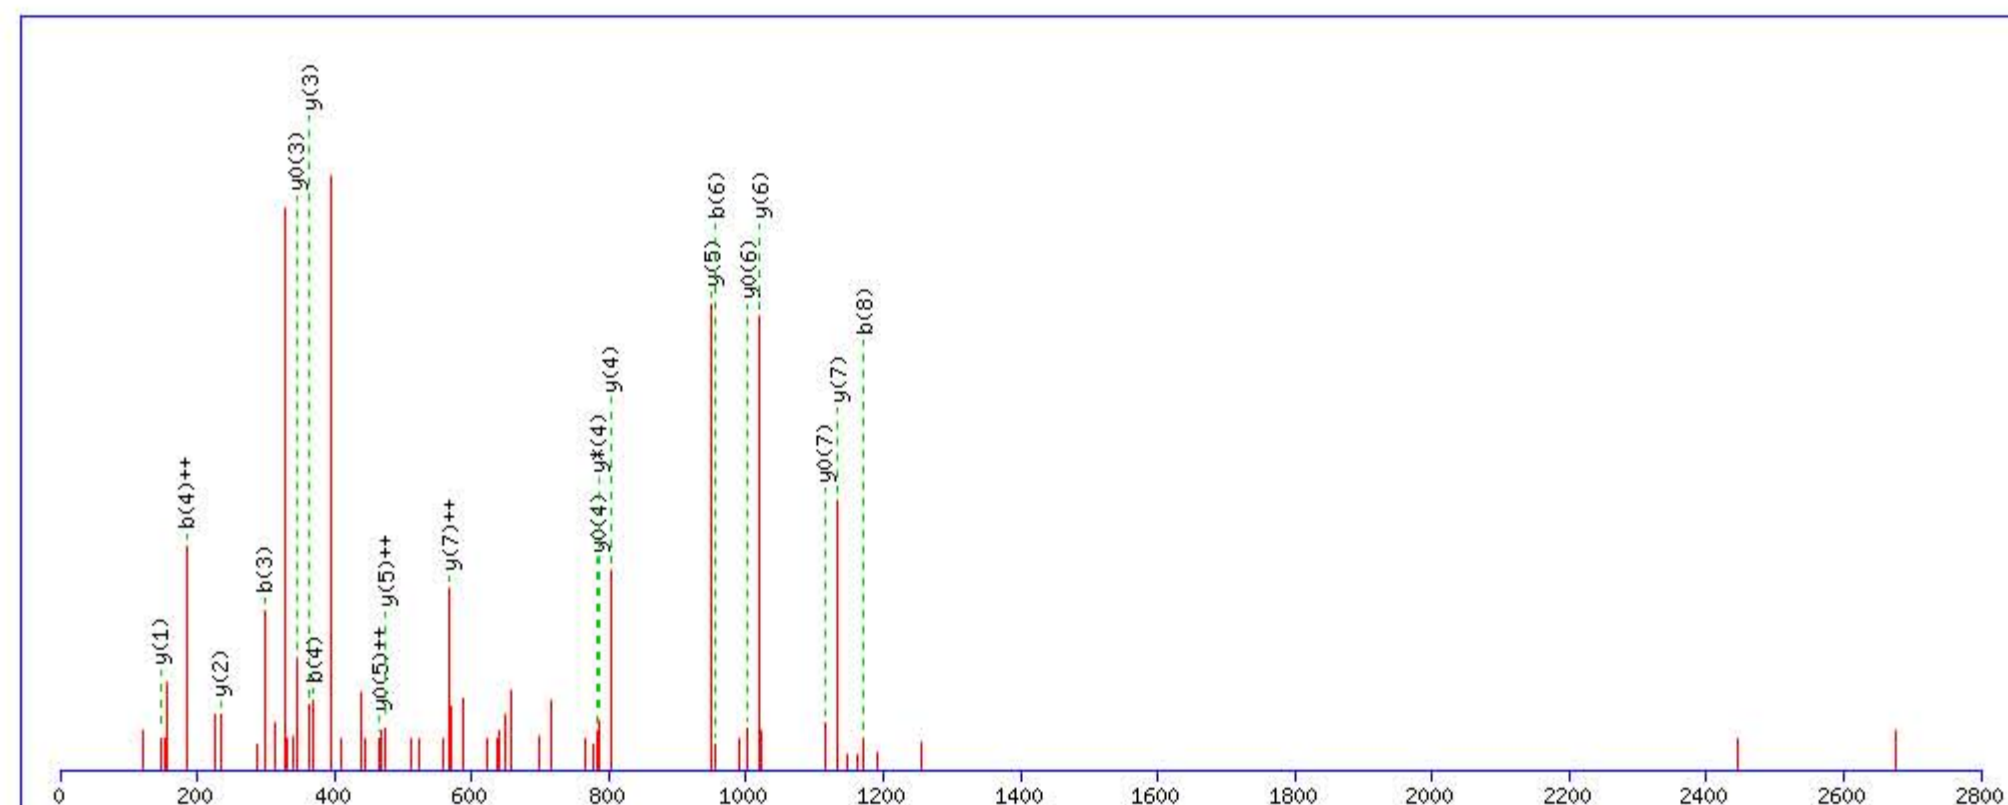

Monoisotopic mass of neutral peptide Mr(calc): 1316.716217

Fixed modifications: Carbamidomethyl (C) (apply to specified residues or termini only)

Variable modifications:

Q6 : Biotin:Thermo-21345 (Q)

Ions Score: 31 Expect: 0.0061

Matches : 21/72 fragment ions using 49 most intense peaks [\(help\)](#)

| # | b                  | b <sup>++</sup>   | b <sup>+</sup> | b <sup>*++</sup> | b <sup>0</sup> | b <sup>0++</sup> | Seq. | y                  | y <sup>++</sup>   | y <sup>+</sup>    | y <sup>*++</sup> | y <sup>0</sup>     | y <sup>0++</sup>  | # |
|---|--------------------|-------------------|----------------|------------------|----------------|------------------|------|--------------------|-------------------|-------------------|------------------|--------------------|-------------------|---|
| 1 | 72.044390          | 36.525833         |                |                  |                |                  | A    |                    |                   |                   |                  |                    |                   | 9 |
| 2 | <b>185.128454</b>  | 93.067865         |                |                  |                |                  | L    | 1246.686407        | 623.846842        | 1229.659858       | 615.333567       | 1228.675842        | 614.841559        | 8 |
| 3 | <b>298.212518</b>  | 149.609897        |                |                  |                |                  | L    | <b>1133.602343</b> | <b>567.304810</b> | 1116.575794       | 558.791535       | <b>1115.591778</b> | 558.299527        | 7 |
| 4 | <b>369.249632</b>  | <b>185.128454</b> |                |                  |                |                  | A    | <b>1020.518279</b> | 510.762778        | 1003.491730       | 502.249503       | <b>1002.507714</b> | 501.757495        | 6 |
| 5 | 516.318046         | 258.662661        |                |                  |                |                  | F    | <b>949.481165</b>  | <b>475.244221</b> | 932.454616        | 466.730946       | 931.470600         | <b>466.238938</b> | 5 |
| 6 | <b>955.543372</b>  | 478.275324        | 938.516823     | 469.762049       |                |                  | Q    | <b>802.412751</b>  | 401.710014        | <b>785.386202</b> | 393.196739       | <b>784.402186</b>  | 392.704731        | 4 |
| 7 | 1084.585965        | 542.796621        | 1067.559416    | 534.283346       | 1066.575400    | 533.791338       | E    | <b>363.187425</b>  | 182.097351        | 346.160876        | 173.584076       | <b>345.176860</b>  | 173.092068        | 3 |
| 8 | <b>1171.617993</b> | 586.312635        | 1154.591444    | 577.799360       | 1153.607428    | 577.307352       | S    | <b>234.144832</b>  | 117.576054        | 217.118283        | 109.062780       | 216.134267         | 108.570772        | 2 |
| 9 |                    |                   |                |                  |                |                  | K    | <b>147.112804</b>  | 74.060040         | 130.086255        | 65.546765        |                    |                   | 1 |

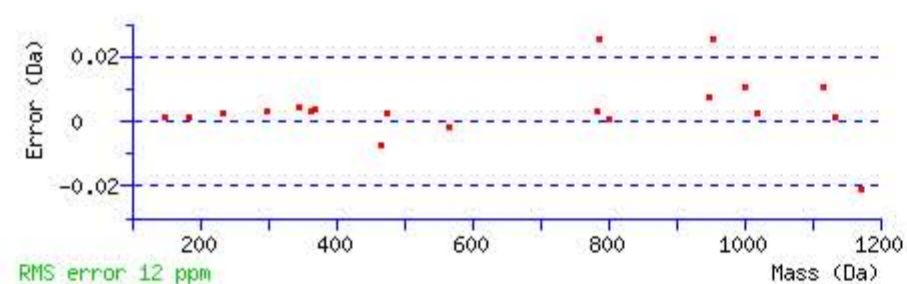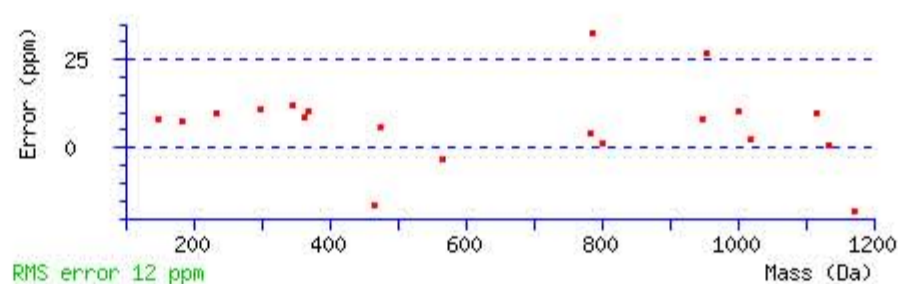

NCBI BLAST search of [ALLAFQESK](#)

(Parameters: blastp, nr protein database, expect=20000, no filter, PAM30)

Other BLAST [web gateways](#)

## All matches to this query

| Score | Mr(calc):   | Delta     | Sequence                     |
|-------|-------------|-----------|------------------------------|
| 30.9  | 1316.716217 | 0.003731  | <a href="#">ALLAFQESK</a>    |
| 7.1   | 1316.731293 | -0.011345 | <a href="#">RVLAFISRNQN</a>  |
| 5.5   | 1316.704788 | 0.015160  | <a href="#">RATEEISKDLR</a>  |
| 4.9   | 1316.733994 | -0.014046 | <a href="#">LALVINGDFLDK</a> |

Mascot: <http://www.matrixscience.com/>









# **MATRIX SCIENCE** Mascot Search Results

## Peptide View

### MS/MS Fragmentation of **SIPQVSPVR**

Found in **CBPN\_HUMAN**, Carboxypeptidase N catalytic chain OS=Homo sapiens GN=CPN1 PE=1 SV=1

Match to Query 20236: 1292.723608 from(647.369080,2+) rtinseconds(1900) index(31110)

Title: Locus:1.1.1.3325.19 File:"2013-07-02 CLN FXIII 180 min 3rd F 3.wiff"

Data file C:\Program Files (x86)\Matrix Science\Mascot Daemon\mgf9 FXIII 180 min 3rd\mascot\_daemon\_merge.mgf

Click mouse within plot area to zoom in by factor of two about that point

Or, Plot from  to  Da

Label all possible matches  Label matches used for scoring

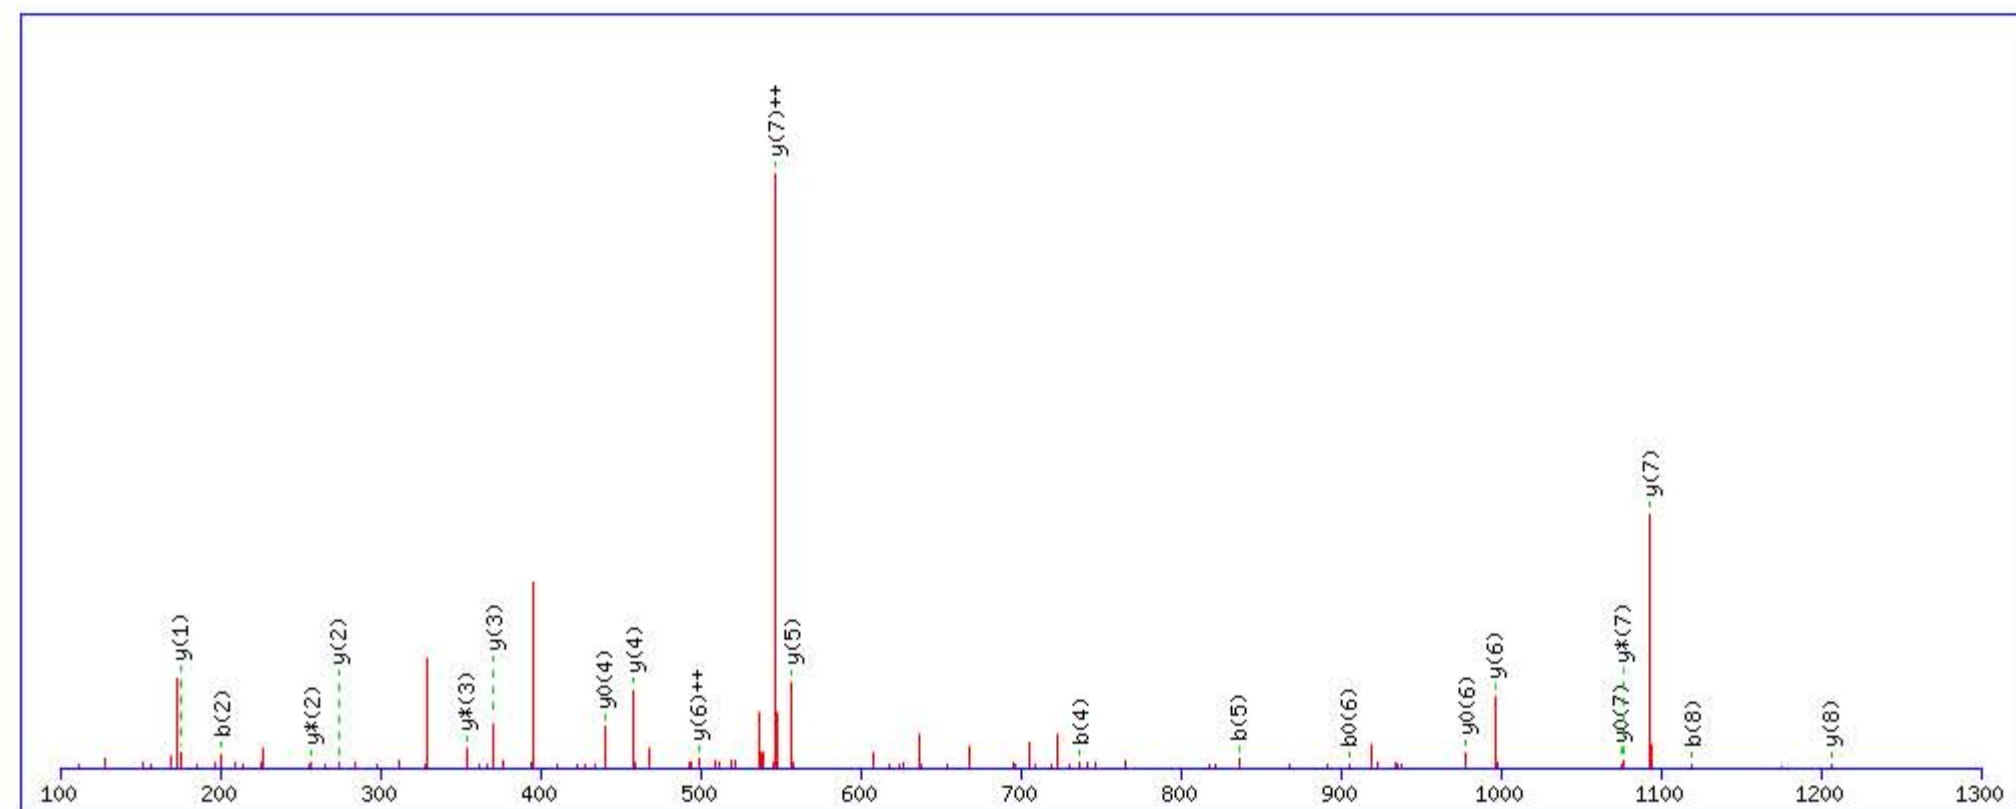

Monoisotopic mass of neutral peptide Mr(calc): 1292.727478

Fixed modifications: Carbamidomethyl (C) (apply to specified residues or termini only)

Variable modifications:

Q4 : Biotin:Thermo-21345 (Q)

Ions Score: 45 Expect: 0.0002

Matches : 21/84 fragment ions using 43 most intense peaks [\(help\)](#)

| # | b                  | b <sup>++</sup> | b*          | b <sup>+++</sup> | b <sup>0</sup>    | b <sup>0++</sup> | Seq. | y                  | y <sup>++</sup>   | y*                 | y <sup>+++</sup> | y <sup>0</sup>     | y <sup>0++</sup> | # |
|---|--------------------|-----------------|-------------|------------------|-------------------|------------------|------|--------------------|-------------------|--------------------|------------------|--------------------|------------------|---|
| 1 | 88.039304          | 44.523290       |             |                  | 70.028739         | 35.518008        | S    |                    |                   |                    |                  |                    |                  | 9 |
| 2 | <b>201.123368</b>  | 101.065322      |             |                  | 183.112803        | 92.060039        | I    | <b>1206.702726</b> | 603.855001        | 1189.676177        | 595.341727       | 1188.692161        | 594.849718       | 8 |
| 3 | 298.176132         | 149.591704      |             |                  | 280.165567        | 140.586422       | P    | <b>1093.618662</b> | <b>547.312969</b> | <b>1076.592113</b> | 538.799695       | <b>1075.608097</b> | 538.307687       | 7 |
| 4 | <b>737.401458</b>  | 369.204367      | 720.374909  | 360.691093       | 719.390893        | 360.199085       | Q    | <b>996.565898</b>  | <b>498.786587</b> | 979.539349         | 490.273313       | <b>978.555333</b>  | 489.781305       | 6 |
| 5 | <b>836.469872</b>  | 418.738574      | 819.443323  | 410.225300       | 818.459307        | 409.733292       | V    | <b>557.340572</b>  | 279.173924        | 540.314023         | 270.660650       | 539.330007         | 270.168642       | 5 |
| 6 | 923.501900         | 462.254588      | 906.475351  | 453.741313       | <b>905.491335</b> | 453.249305       | S    | <b>458.272158</b>  | 229.639717        | 441.245609         | 221.126443       | <b>440.261593</b>  | 220.634435       | 4 |
| 7 | 1020.554664        | 510.780970      | 1003.528115 | 502.267696       | 1002.544099       | 501.775688       | P    | <b>371.240130</b>  | 186.123703        | <b>354.213581</b>  | 177.610429       |                    |                  | 3 |
| 8 | <b>1119.623078</b> | 560.315177      | 1102.596529 | 551.801903       | 1101.612513       | 551.309895       | V    | <b>274.187366</b>  | 137.597321        | <b>257.160817</b>  | 129.084047       |                    |                  | 2 |
| 9 |                    |                 |             |                  |                   |                  | R    | <b>175.118952</b>  | 88.063114         | 158.092403         | 79.549839        |                    |                  | 1 |

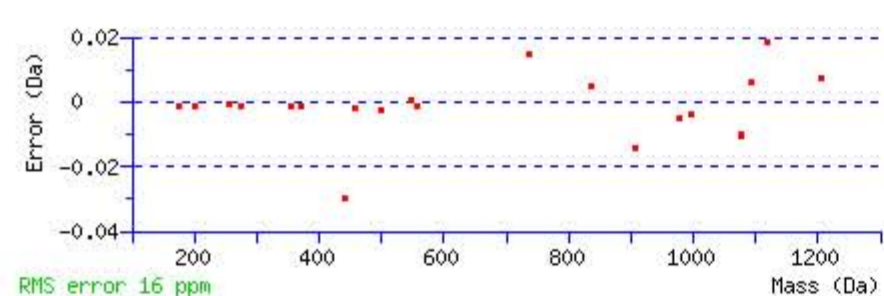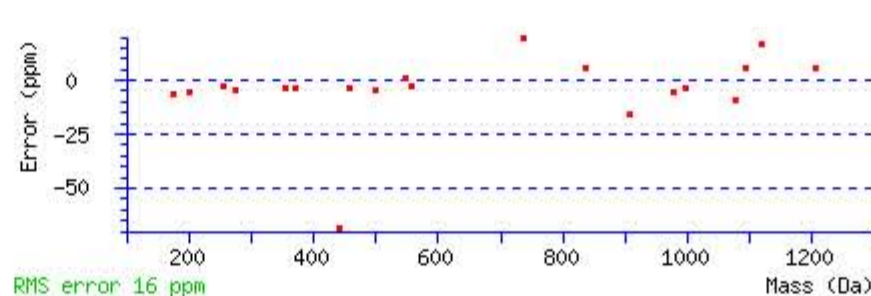

### NCBI BLAST search of **SIPQVSPVR**

(Parameters: blastp, nr protein database, expect=20000, no filter, PAM30)

Other BLAST [web gateways](#)

### All matches to this query

| Score | Mr(calc):   | Delta     | Sequence                     |
|-------|-------------|-----------|------------------------------|
| 45.2  | 1292.727478 | -0.003870 | <a href="#">SIPQVSPVR</a>    |
| 5.5   | 1292.708847 | 0.014761  | <a href="#">VTQPELIQTHK</a>  |
| 3.9   | 1292.731308 | -0.007700 | <a href="#">ASHVRDAVAVIR</a> |
| 1.4   | 1292.716202 | 0.007406  | <a href="#">SLAMLQLYNK</a>   |
| 1.4   | 1292.708801 | 0.014807  | <a href="#">SLKRAEAEVYK</a>  |
| 1.3   | 1292.708817 | 0.014791  | <a href="#">AEVANHLAVLEK</a> |
| 1.3   | 1292.720078 | 0.003530  | <a href="#">QNKSVLVPHGSK</a> |
| 0.8   | 1292.727448 | -0.003840 | <a href="#">LSKQHLEK</a>     |

Mascot: <http://www.matrixscience.com/>





**Mascot Search Results**

**Peptide View**

MS/MS Fragmentation of **QLVCPVTR**

Found in **CPN2\_HUMAN**, Carboxypeptidase N subunit 2 OS=Homo sapiens GN=CPN2 PE=1 SV=3

Match to Query 19991: 1282.684032 from(428.568620,3+) rtinseconds(1787) index(30516)

Title: Locus:1.1.1.3286.3 File:"2013-07-02 CLN FXIII 180 min 3rd F 3.wiff"

Data file C:\Program Files (x86)\Matrix Science\Mascot Daemon\mgf9 FXIII 180 min 3rd\mascot\_daemon\_merge.mgf

Click mouse within plot area to zoom in by factor of two about that point

Or, Plot from  to  Da

Label all possible matches  Label matches used for scoring

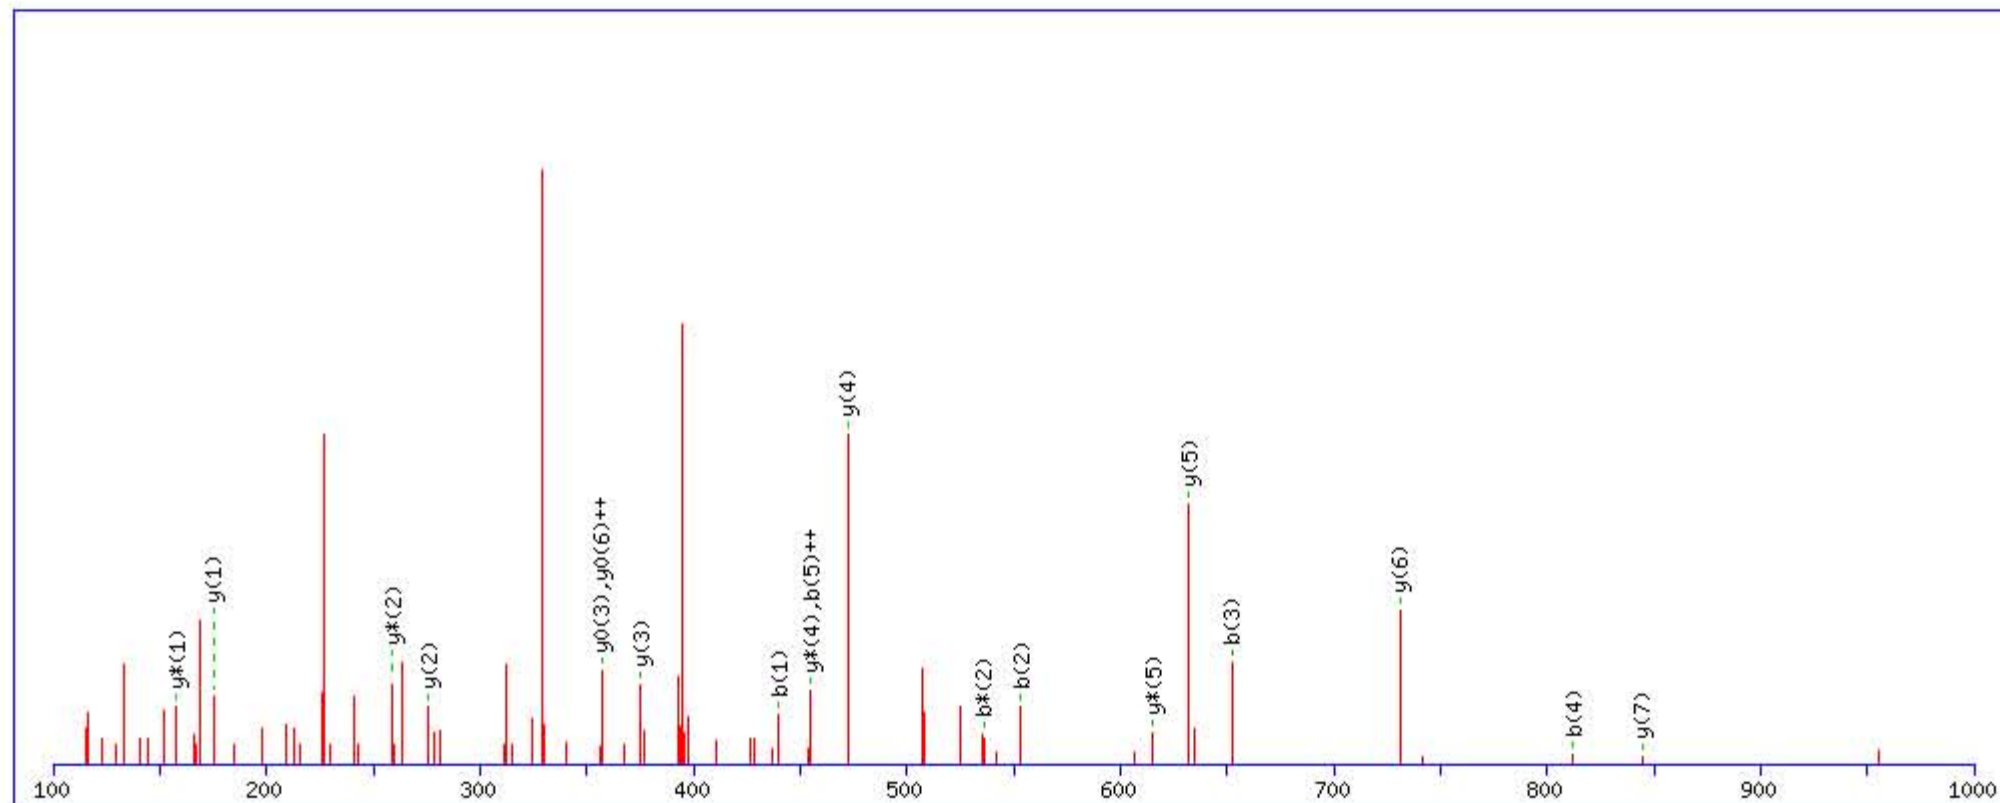

Monoisotopic mass of neutral peptide Mr(calc): 1282.688995

Fixed modifications: Carbamidomethyl (C) (apply to specified residues or termini only)

Variable modifications:

Q1 : Biotin:Thermo-21345 (Q)

Ions Score: 29 Expect: 0.0027

Matches : 19/70 fragment ions using 43 most intense peaks [\(help\)](#)

| # | b           | b <sup>++</sup> | b*          | b <sup>+++</sup> | b <sup>0</sup> | b <sup>0++</sup> | Seq. | y          | y <sup>++</sup> | y*         | y <sup>+++</sup> | y <sup>0</sup> | y <sup>0++</sup> | # |
|---|-------------|-----------------|-------------|------------------|----------------|------------------|------|------------|-----------------|------------|------------------|----------------|------------------|---|
| 1 | 440.232602  | 220.619939      | 423.206053  | 212.106664       |                |                  | Q    |            |                 |            |                  |                |                  | 8 |
| 2 | 553.316666  | 277.161971      | 536.290117  | 268.648697       |                |                  | L    | 844.470936 | 422.739106      | 827.444387 | 414.225831       | 826.460371     | 413.733823       | 7 |
| 3 | 652.385080  | 326.696178      | 635.358531  | 318.182904       |                |                  | V    | 731.386872 | 366.197074      | 714.360323 | 357.683799       | 713.376307     | 357.191791       | 6 |
| 4 | 812.415729  | 406.711503      | 795.389180  | 398.198228       |                |                  | C    | 632.318458 | 316.662867      | 615.291909 | 308.149592       | 614.307893     | 307.657584       | 5 |
| 5 | 909.468493  | 455.237885      | 892.441944  | 446.724610       |                |                  | P    | 472.287809 | 236.647542      | 455.261260 | 228.134268       | 454.277244     | 227.642260       | 4 |
| 6 | 1008.536907 | 504.772092      | 991.510358  | 496.258817       |                |                  | V    | 375.235045 | 188.121160      | 358.208496 | 179.607886       | 357.224480     | 179.115878       | 3 |
| 7 | 1109.584586 | 555.295931      | 1092.558037 | 546.782657       | 1091.574021    | 546.290648       | T    | 276.166631 | 138.586953      | 259.140082 | 130.073679       | 258.156066     | 129.581671       | 2 |
| 8 |             |                 |             |                  |                |                  | R    | 175.118952 | 88.063114       | 158.092403 | 79.549839        |                |                  | 1 |

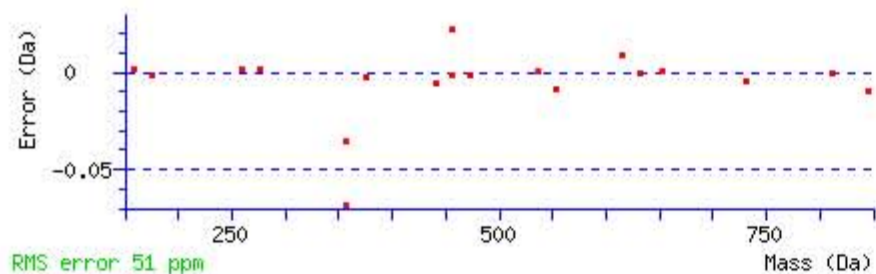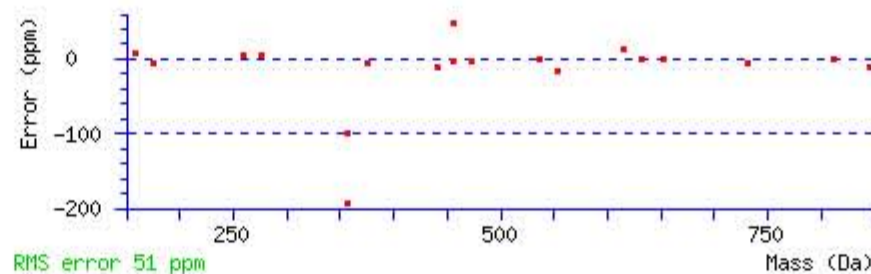

NCBI BLAST search of **QLVCPVTR**

(Parameters: blastp, nr protein database, expect=20000, no filter, PAM30)

Other BLAST [web gateways](#)

**All matches to this query**

| Score | Mr(calc):   | Delta     | Sequence                      |
|-------|-------------|-----------|-------------------------------|
| 28.9  | 1282.688995 | -0.004963 | <a href="#">QLVCPVTR</a>      |
| 1.5   | 1282.688080 | -0.004048 | <a href="#">INEDPKDALLR</a>   |
| 0.8   | 1282.681595 | 0.002437  | <a href="#">KNMGGLGGLVHGK</a> |
| 0.5   | 1282.699341 | -0.015309 | <a href="#">LSAISLGQGQGR</a>  |







# MASCOT Search Results

## Peptide View

MS/MS Fragmentation of **SSTGPGEQLR**

Found in **COMP\_HUMAN**, Cartilage oligomeric matrix protein OS=Homo sapiens GN=COMP PE=1 SV=2

Match to Query 21168: 1341.669528 from(671.842040,2+) rtinseconds(1616) index(43609)

Title: Locus:1.1.1.3275.19 File:"2013-07-02 CLN FXIII 180 min 3rd F 4.wiff"

Data file C:\Program Files (x86)\Matrix Science\Mascot Daemon\mgf9 FXIII 180 min 3rd\mascot\_daemon\_merge.mgf

Click mouse within plot area to zoom in by factor of two about that point

Or, Plot from  to  Da

Label all possible matches  Label matches used for scoring

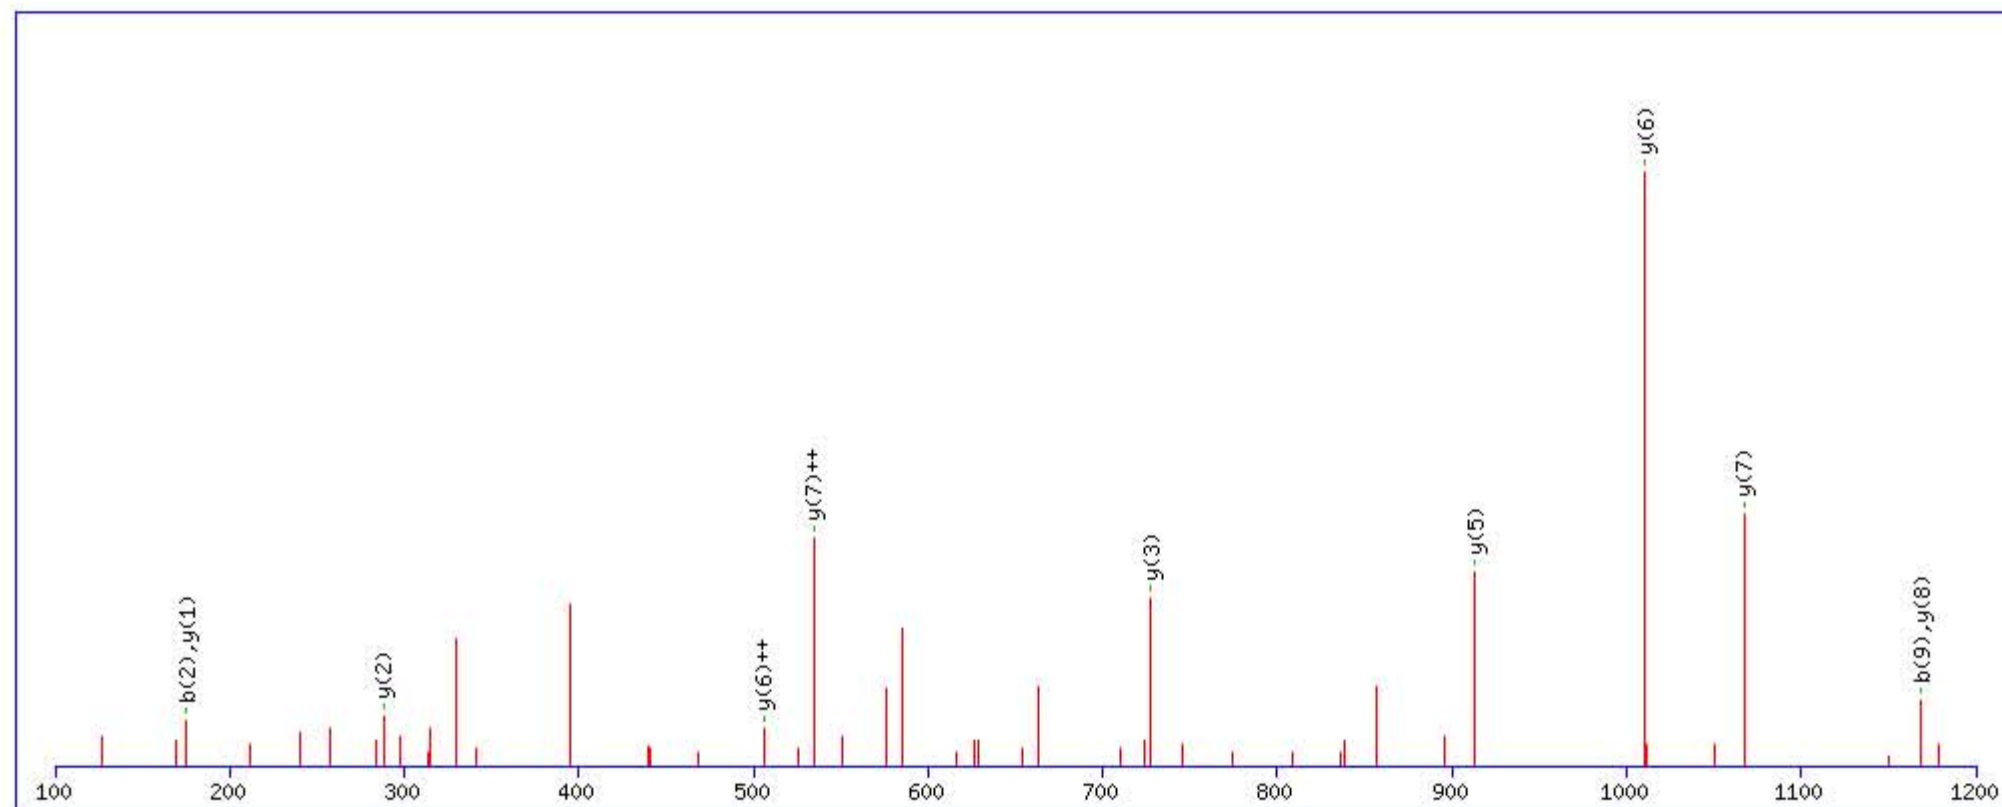

Monoisotopic mass of neutral peptide Mr(calc): 1341.671082

Fixed modifications: Carbamidomethyl (C) (apply to specified residues or termini only)

Variable modifications:

Q8 : Biotin:Thermo-21345 (Q)

Ions Score: 67 Expect: 3.5e-006

Matches : 11/88 fragment ions using 11 most intense peaks [\(help\)](#)

| #  | b                  | b <sup>++</sup> | b <sup>+</sup> | b <sup>+++</sup> | b <sup>0</sup> | b <sup>0++</sup> | Seq. | y                  | y <sup>++</sup>   | y <sup>+</sup> | y <sup>+++</sup> | y <sup>0</sup> | y <sup>0++</sup> | #  |
|----|--------------------|-----------------|----------------|------------------|----------------|------------------|------|--------------------|-------------------|----------------|------------------|----------------|------------------|----|
| 1  | 88.039304          | 44.523290       |                |                  | 70.028739      | 35.518008        | S    |                    |                   |                |                  |                |                  | 10 |
| 2  | <b>175.071332</b>  | 88.039304       |                |                  | 157.060767     | 79.034021        | S    | 1255.646334        | 628.326805        | 1238.619785    | 619.813530       | 1237.635769    | 619.321522       | 9  |
| 3  | 276.119011         | 138.563144      |                |                  | 258.108446     | 129.557861       | T    | <b>1168.614306</b> | 584.810791        | 1151.587757    | 576.297517       | 1150.603741    | 575.805508       | 8  |
| 4  | 333.140475         | 167.073875      |                |                  | 315.129910     | 158.068593       | G    | <b>1067.566627</b> | <b>534.286951</b> | 1050.540078    | 525.773677       | 1049.556062    | 525.281669       | 7  |
| 5  | 430.193239         | 215.600258      |                |                  | 412.182674     | 206.594975       | P    | <b>1010.545163</b> | <b>505.776219</b> | 993.518614     | 497.262945       | 992.534598     | 496.770937       | 6  |
| 6  | 487.214703         | 244.110989      |                |                  | 469.204138     | 235.105707       | G    | <b>913.492399</b>  | 457.249837        | 896.465850     | 448.736563       | 895.481834     | 448.244555       | 5  |
| 7  | 616.257296         | 308.632286      |                |                  | 598.246731     | 299.627004       | E    | 856.470935         | 428.739105        | 839.444386     | 420.225831       | 838.460370     | 419.733823       | 4  |
| 8  | 1055.482622        | 528.244949      | 1038.456073    | 519.731675       | 1037.472057    | 519.239667       | Q    | <b>727.428342</b>  | 364.217809        | 710.401793     | 355.704534       |                |                  | 3  |
| 9  | <b>1168.566686</b> | 584.786981      | 1151.540137    | 576.273707       | 1150.556121    | 575.781698       | L    | <b>288.203016</b>  | 144.605146        | 271.176467     | 136.091871       |                |                  | 2  |
| 10 |                    |                 |                |                  |                |                  | R    | <b>175.118952</b>  | 88.063114         | 158.092403     | 79.549839        |                |                  | 1  |

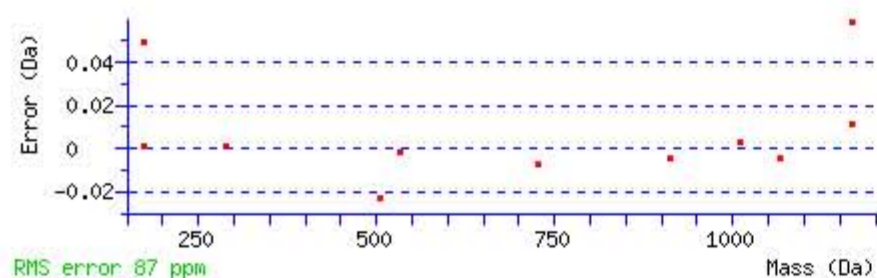

RMS error 87 ppm

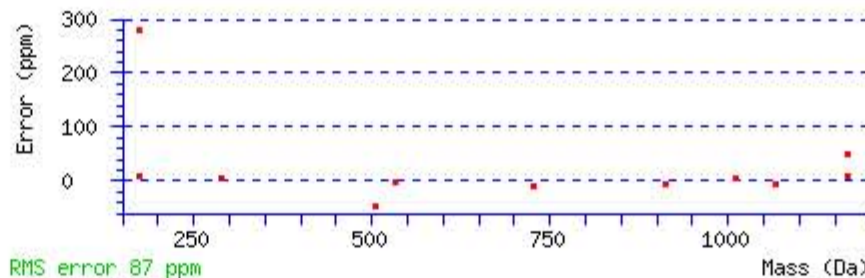

RMS error 87 ppm

NCBI BLAST search of **SSTGPGEQLR**

(Parameters: blastp, nr protein database, expect=20000, no filter, PAM30)

Other BLAST [web gateways](#)

## All matches to this query

| Score | Mr(calc):   | Delta     | Sequence                      |
|-------|-------------|-----------|-------------------------------|
| 67.3  | 1341.671082 | -0.001554 | <a href="#">SSTGPGEQLR</a>    |
| 11.9  | 1341.674911 | -0.005383 | <a href="#">TSPERREPGTGR</a>  |
| 11.3  | 1341.663651 | 0.005877  | <a href="#">ESARDPKPEASR</a>  |
| 7.3   | 1341.653793 | 0.015735  | <a href="#">GFAEHGKQQQGR</a>  |
| 6.8   | 1341.663681 | 0.005847  | <a href="#">SSHKDSPRDVSK</a>  |
| 6.8   | 1341.688828 | -0.019300 | <a href="#">DDAQLSGLPSALR</a> |
| 6.5   | 1341.682297 | -0.012769 | <a href="#">ASEQDVRAR</a>     |
| 6.5   | 1341.653336 | 0.016192  | <a href="#">STVQPPCSR</a>     |
| 2.9   | 1341.680267 | -0.010739 | <a href="#">KFHEKHHSR</a>     |
| 2.7   | 1341.671051 | -0.001523 | <a href="#">ASQEEQIAR</a>     |

**MATRIX SCIENCE Mascot Search Results**

**Peptide View**

MS/MS Fragmentation of **NALWHTGDTESQVR**  
 Found in **COMP\_HUMAN**, Cartilage oligomeric matrix protein OS=Homo sapiens GN=COMP PE=1 SV=2

Match to Query 37864: 1923.922872 from(642.314900,3+) rtinseconds(1810) index(44827)  
 Title: Locus:1.1.1.3343.8 File:"2013-07-02 CLN FXIII 180 min 3rd F 4.wiff"  
 Data file C:\Program Files (x86)\Matrix Science\Mascot Daemon\mgf\9 FXIII 180 min 3rd\mascot\_daemon\_merge.mgf

Click mouse within plot area to zoom in by factor of two about that point  
 Or, Plot from 100 to 2000 Da Full range  
 Label all possible matches  Label matches used for scoring

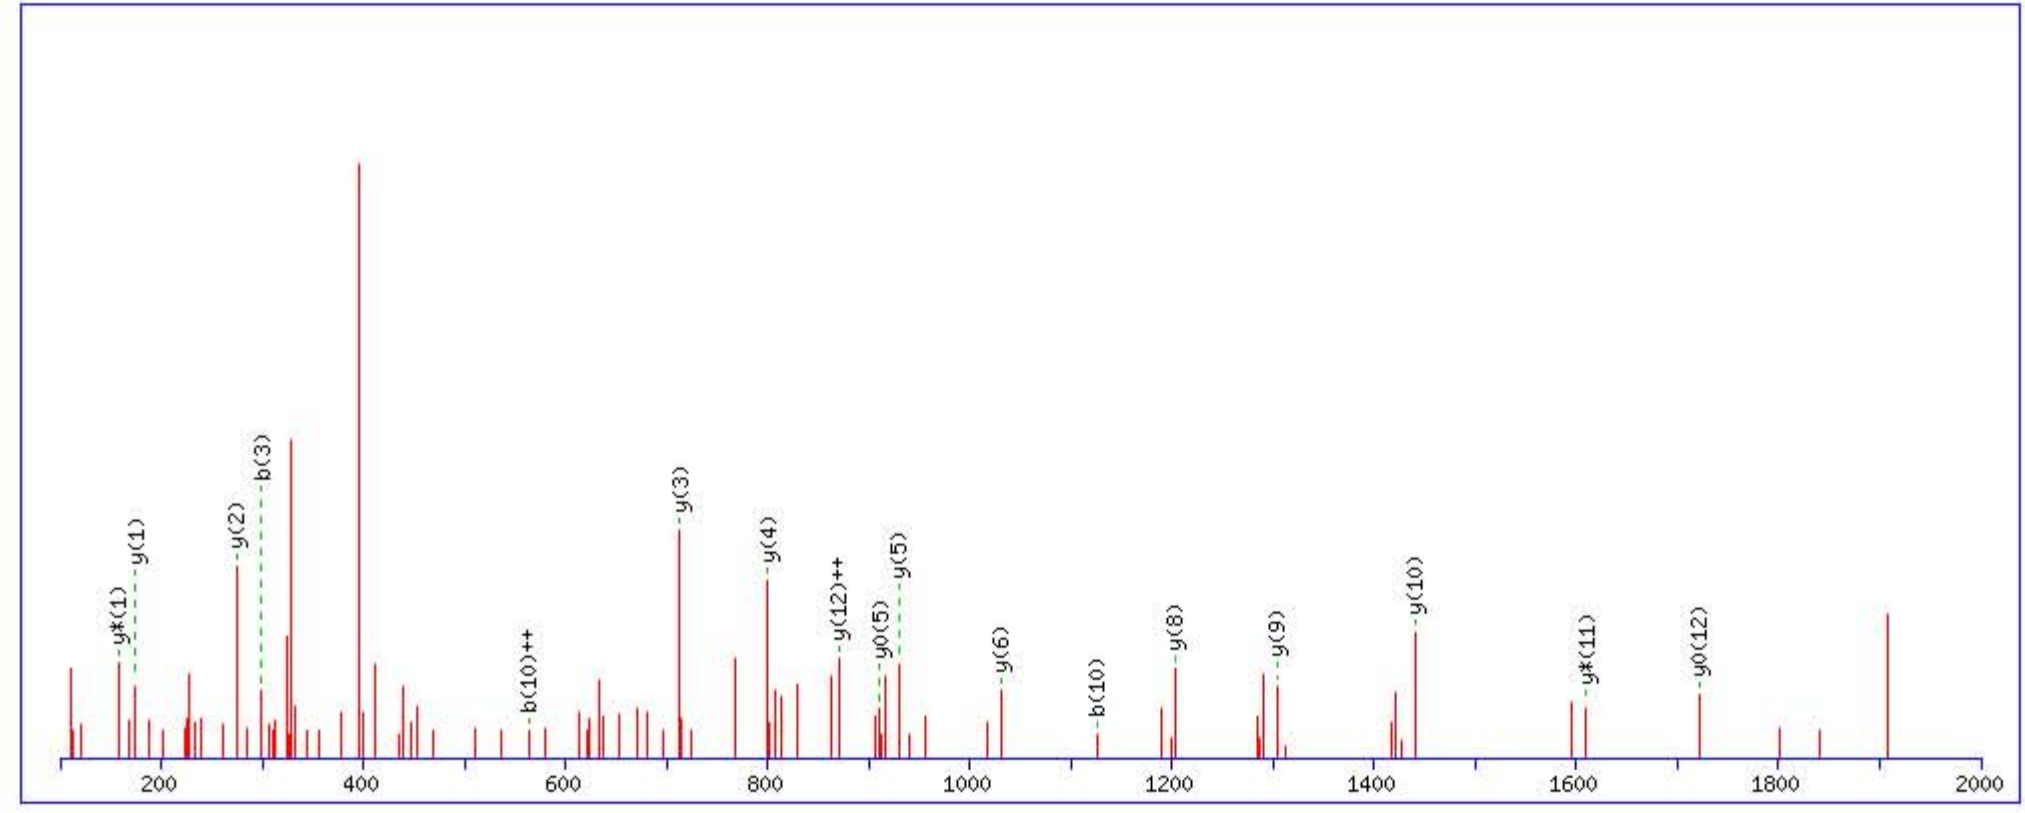

Monoisotopic mass of neutral peptide Mr(calc): 1923.926132  
 Fixed modifications: Carbamidomethyl (C) (apply to specified residues or termini only)  
 Variable modifications:  
 Q12 : Biotin:Thermo-21345 (Q)  
 Ions Score: 33 Expect: 0.0021  
 Matches : 17/140 fragment ions using 45 most intense peaks ([help](#))

| #  | b                  | b <sup>++</sup>   | b <sup>+</sup> | b <sup>+++</sup> | b <sup>0</sup> | b <sup>0++</sup> | Seq. | y                  | y <sup>++</sup>   | y <sup>+</sup>     | y <sup>+++</sup> | y <sup>0</sup>     | y <sup>0++</sup> | #  |
|----|--------------------|-------------------|----------------|------------------|----------------|------------------|------|--------------------|-------------------|--------------------|------------------|--------------------|------------------|----|
| 1  | 115.050203         | 58.028740         | 98.023654      | 49.515465        |                |                  | N    |                    |                   |                    |                  |                    |                  | 14 |
| 2  | 186.087317         | 93.547296         | 169.060768     | 85.034022        |                |                  | A    | 1810.890481        | 905.948879        | 1793.863932        | 897.435604       | 1792.879916        | 896.943596       | 13 |
| 3  | <b>299.171381</b>  | 150.089328        | 282.144832     | 141.576054       |                |                  | L    | 1739.853367        | <b>870.430322</b> | 1722.826818        | 861.917047       | <b>1721.842802</b> | 861.425039       | 12 |
| 4  | 485.250694         | 243.128985        | 468.224145     | 234.615711       |                |                  | W    | 1626.769303        | 813.888290        | <b>1609.742754</b> | 805.375015       | 1608.758738        | 804.883007       | 11 |
| 5  | 622.309606         | 311.658441        | 605.283057     | 303.145167       |                |                  | H    | <b>1440.689990</b> | 720.848633        | 1423.663441        | 712.335359       | 1422.679425        | 711.843351       | 10 |
| 6  | 723.357285         | 362.182281        | 706.330736     | 353.669006       | 705.346720     | 353.176998       | T    | <b>1303.631078</b> | 652.319177        | 1286.604529        | 643.805903       | 1285.620513        | 643.313895       | 9  |
| 7  | 780.378749         | 390.693013        | 763.352200     | 382.179738       | 762.368184     | 381.687730       | G    | <b>1202.583399</b> | 601.795338        | 1185.556850        | 593.282063       | 1184.572834        | 592.790055       | 8  |
| 8  | 895.405692         | 448.206484        | 878.379143     | 439.693210       | 877.395127     | 439.201202       | D    | 1145.561935        | 573.284606        | 1128.535386        | 564.771331       | 1127.551370        | 564.279323       | 7  |
| 9  | 996.453371         | 498.730324        | 979.426822     | 490.217049       | 978.442806     | 489.725041       | T    | <b>1030.534992</b> | 515.771134        | 1013.508443        | 507.257860       | 1012.524427        | 506.765852       | 6  |
| 10 | <b>1125.495964</b> | <b>563.251620</b> | 1108.469415    | 554.738346       | 1107.485399    | 554.246337       | E    | <b>929.487313</b>  | 465.247295        | 912.460764         | 456.734020       | <b>911.476748</b>  | 456.242012       | 5  |
| 11 | 1212.527992        | 606.767634        | 1195.501443    | 598.254360       | 1194.517427    | 597.762352       | S    | <b>800.444720</b>  | 400.725998        | 783.418171         | 392.212724       | 782.434155         | 391.720716       | 4  |
| 12 | 1651.753318        | 826.380297        | 1634.726769    | 817.867023       | 1633.742753    | 817.375015       | Q    | <b>713.412692</b>  | 357.209984        | 696.386143         | 348.696710       |                    |                  | 3  |
| 13 | 1750.821732        | 875.914504        | 1733.795183    | 867.401230       | 1732.811167    | 866.909222       | V    | <b>274.187366</b>  | 137.597321        | 257.160817         | 129.084047       |                    |                  | 2  |
| 14 |                    |                   |                |                  |                |                  | R    | <b>175.118952</b>  | 88.063114         | <b>158.092403</b>  | 79.549839        |                    |                  | 1  |

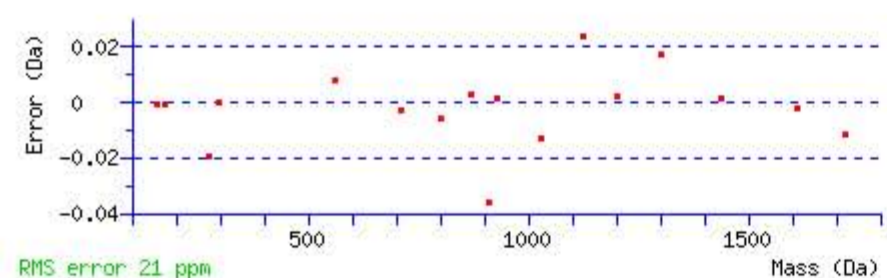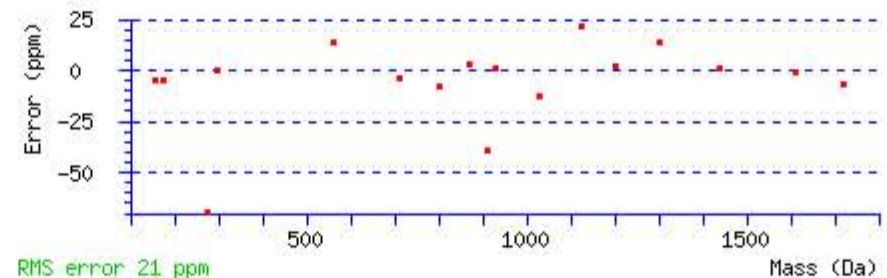

NCBI BLAST search of **NALWHTGDTESQVR**  
 (Parameters: blastp, nr protein database, expect=20000, no filter, PAM30)  
 Other BLAST [web gateways](#)

**All matches to this query**

| Score | Mr(calc):   | Delta     | Sequence                       |
|-------|-------------|-----------|--------------------------------|
| 33.3  | 1923.926132 | -0.003260 | <a href="#">NALWHTGDTESQVR</a> |
| 4.8   | 1923.933533 | -0.010661 | <a href="#">ICGKGFDPSSVQR</a>  |

Mascot: <http://www.matrixscience.com/>





**MATRIX** SCIENCE **Mascot Search Results**

**Peptide View**

MS/MS Fragmentation of **NNEGTYYSNPYNPQSR**

Found in **CERU\_HUMAN**, Ceruloplasmin OS=Homo sapiens GN=CP PE=1 SV=1

Match to Query 26525: 2213.985702 from(739.002510,3+) rtinseconds(1831) index(44931)  
 Title: Locus:1.1.1.3350.6 File:"2013-07-02 CLN FXIII 180 min 3rd F 4.wiff"  
 Data file C:\Program Files (x86)\Matrix Science\Mascot Daemon\mgf\9 FXIII 180 min 3rd\mascot\_daemon\_merge.mgf

Click mouse within plot area to zoom in by factor of two about that point  
 Or, Plot from 0 to 2200 Da Full range  
 Label all possible matches  Label matches used for scoring

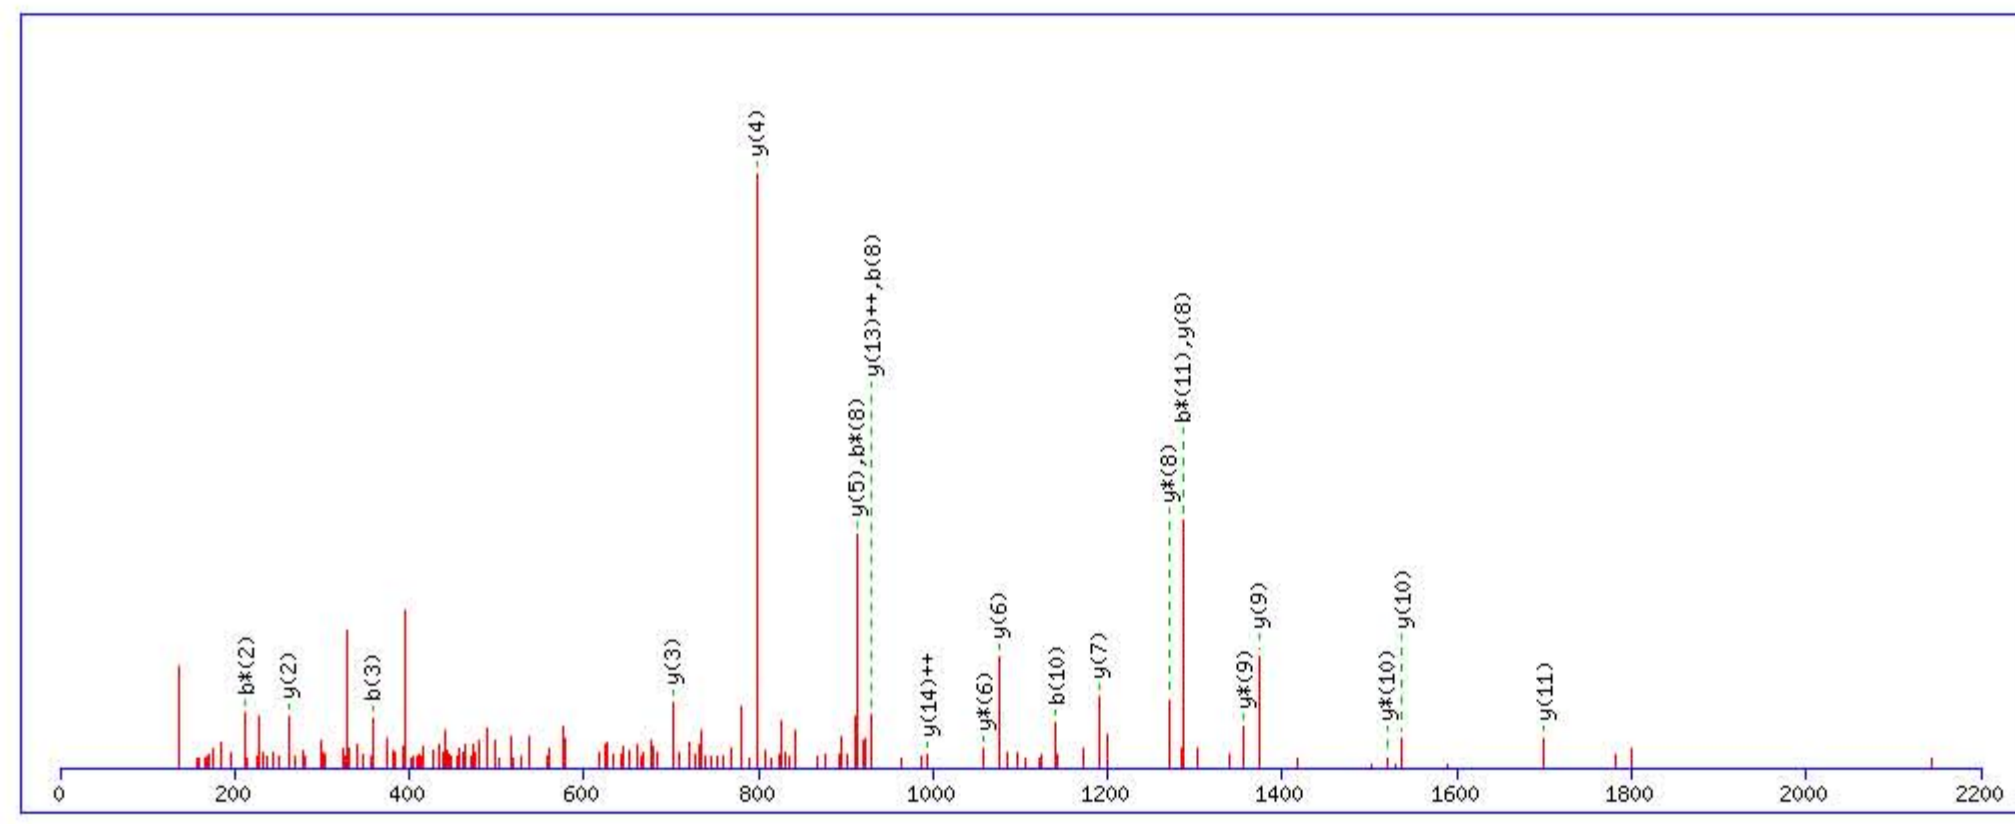

Monoisotopic mass of neutral peptide  $M_r(\text{calc})$ : 2213.979980  
 Fixed modifications: Carbamidomethyl (C) (apply to specified residues or termini only)  
 Variable modifications:  
 Q14 : Biotin:Thermo-21345 (Q)  
 Ions Score: 59 Expect: 1e-005  
 Matches : 22/174 fragment ions using 34 most intense peaks [\(help\)](#)

| #  | b                  | b <sup>++</sup> | b*                 | b <sup>+++</sup> | b <sup>0</sup> | b <sup>0++</sup> | Seq. | y                  | y <sup>++</sup>   | y*                 | y <sup>+++</sup> | y <sup>0</sup> | y <sup>0++</sup> | #  |
|----|--------------------|-----------------|--------------------|------------------|----------------|------------------|------|--------------------|-------------------|--------------------|------------------|----------------|------------------|----|
| 1  | 115.050203         | 58.028740       | 98.023654          | 49.515465        |                |                  | N    |                    |                   |                    |                  |                |                  | 16 |
| 2  | 229.093130         | 115.050203      | 212.066581         | 106.536929       |                |                  | N    | 2100.944366        | 1050.975821       | 2083.917817        | 1042.462546      | 2082.933801    | 1041.970538      | 15 |
| 3  | <b>358.135723</b>  | 179.571500      | 341.109174         | 171.058225       | 340.125158     | 170.566217       | E    | 1986.901439        | <b>993.954358</b> | 1969.874890        | 985.441083       | 1968.890874    | 984.949075       | 14 |
| 4  | 415.157187         | 208.082232      | 398.130638         | 199.568957       | 397.146622     | 199.076949       | G    | 1857.858846        | <b>929.433061</b> | 1840.832297        | 920.919787       | 1839.848281    | 920.427779       | 13 |
| 5  | 516.204866         | 258.606071      | 499.178317         | 250.092797       | 498.194301     | 249.600789       | T    | 1800.837382        | 900.922329        | 1783.810833        | 892.409055       | 1782.826817    | 891.917047       | 12 |
| 6  | 679.268195         | 340.137736      | 662.241646         | 331.624461       | 661.257630     | 331.132453       | Y    | <b>1699.789703</b> | 850.398490        | 1682.763154        | 841.885215       | 1681.779138    | 841.393207       | 11 |
| 7  | 842.331524         | 421.669400      | 825.304975         | 413.156126       | 824.320959     | 412.664118       | Y    | <b>1536.726374</b> | 768.866825        | <b>1519.699825</b> | 760.353551       | 1518.715809    | 759.861543       | 10 |
| 8  | <b>929.363552</b>  | 465.185414      | <b>912.337003</b>  | 456.672140       | 911.352987     | 456.180132       | S    | <b>1373.663045</b> | 687.335161        | <b>1356.636496</b> | 678.821886       | 1355.652480    | 678.329878       | 9  |
| 9  | 1026.416316        | 513.711796      | 1009.389767        | 505.198522       | 1008.405751    | 504.706514       | P    | <b>1286.631017</b> | 643.819147        | <b>1269.604468</b> | 635.305872       | 1268.620452    | 634.813864       | 8  |
| 10 | <b>1140.459243</b> | 570.733260      | 1123.432694        | 562.219985       | 1122.448678    | 561.727977       | N    | <b>1189.578253</b> | 595.292765        | 1172.551704        | 586.779490       | 1171.567688    | 586.287482       | 7  |
| 11 | 1303.522572        | 652.264924      | <b>1286.496023</b> | 643.751650       | 1285.512007    | 643.259642       | Y    | <b>1075.535326</b> | 538.271301        | <b>1058.508777</b> | 529.758027       | 1057.524761    | 529.266019       | 6  |
| 12 | 1417.565499        | 709.286388      | 1400.538950        | 700.773113       | 1399.554934    | 700.281105       | N    | <b>912.471997</b>  | 456.739637        | 895.445448         | 448.226362       | 894.461432     | 447.734354       | 5  |
| 13 | 1514.618263        | 757.812770      | 1497.591714        | 749.299495       | 1496.607698    | 748.807487       | P    | <b>798.429070</b>  | 399.718173        | 781.402521         | 391.204899       | 780.418505     | 390.712891       | 4  |
| 14 | 1953.843589        | 977.425433      | 1936.817040        | 968.912158       | 1935.833024    | 968.420150       | Q    | <b>701.376306</b>  | 351.191791        | 684.349757         | 342.678517       | 683.365741     | 342.186509       | 3  |
| 15 | 2040.875617        | 1020.941447     | 2023.849068        | 1012.428172      | 2022.865052    | 1011.936164      | S    | <b>262.150980</b>  | 131.579128        | 245.124431         | 123.065854       | 244.140415     | 122.573846       | 2  |
| 16 |                    |                 |                    |                  |                |                  | R    | 175.118952         | 88.063114         | 158.092403         | 79.549839        |                |                  | 1  |

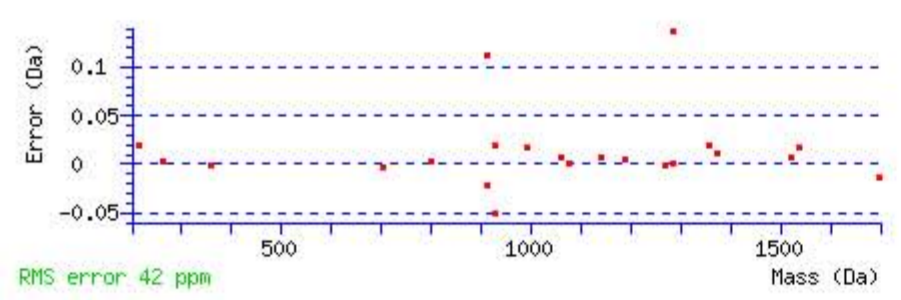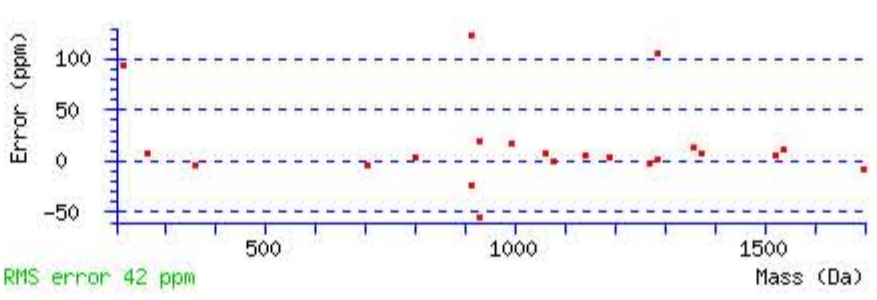

NCBI BLAST search of **NNEGTYYSNPYNPQSR**  
 (Parameters: blastp, nr protein database, expect=20000, no filter, PAM30)  
 Other BLAST [web gateways](#)

**All matches to this query**

| Score | $M_r(\text{calc})$ : | Delta    | Sequence                         |
|-------|----------------------|----------|----------------------------------|
| 58.6  | 2213.979980          | 0.005722 | <a href="#">NNEGTYYSNPYNPQSR</a> |

# MATRIX SCIENCE Mascot Search Results

## Peptide View

MS/MS Fragmentation of **VDKDNEDFQESNR**

Found in **CERU\_HUMAN**, Ceruloplasmin OS=Homo sapiens GN=CP PE=1 SV=1

Match to Query 37483: 1905.845952 from(636.289260,3+) rtinseconds(1503) index(28860)

Title: Locus:1.1.1.3186.24 File:"2013-07-02 CLN FXIII 180 min 3rd F 3.wiff"

Data file C:\Program Files (x86)\Matrix Science\Mascot Daemon\mgf\9 FXIII 180 min 3rd\mascot\_daemon\_merge.mgf

Click mouse within plot area to zoom in by factor of two about that point

Or, Plot from  to  Da

Label all possible matches  Label matches used for scoring

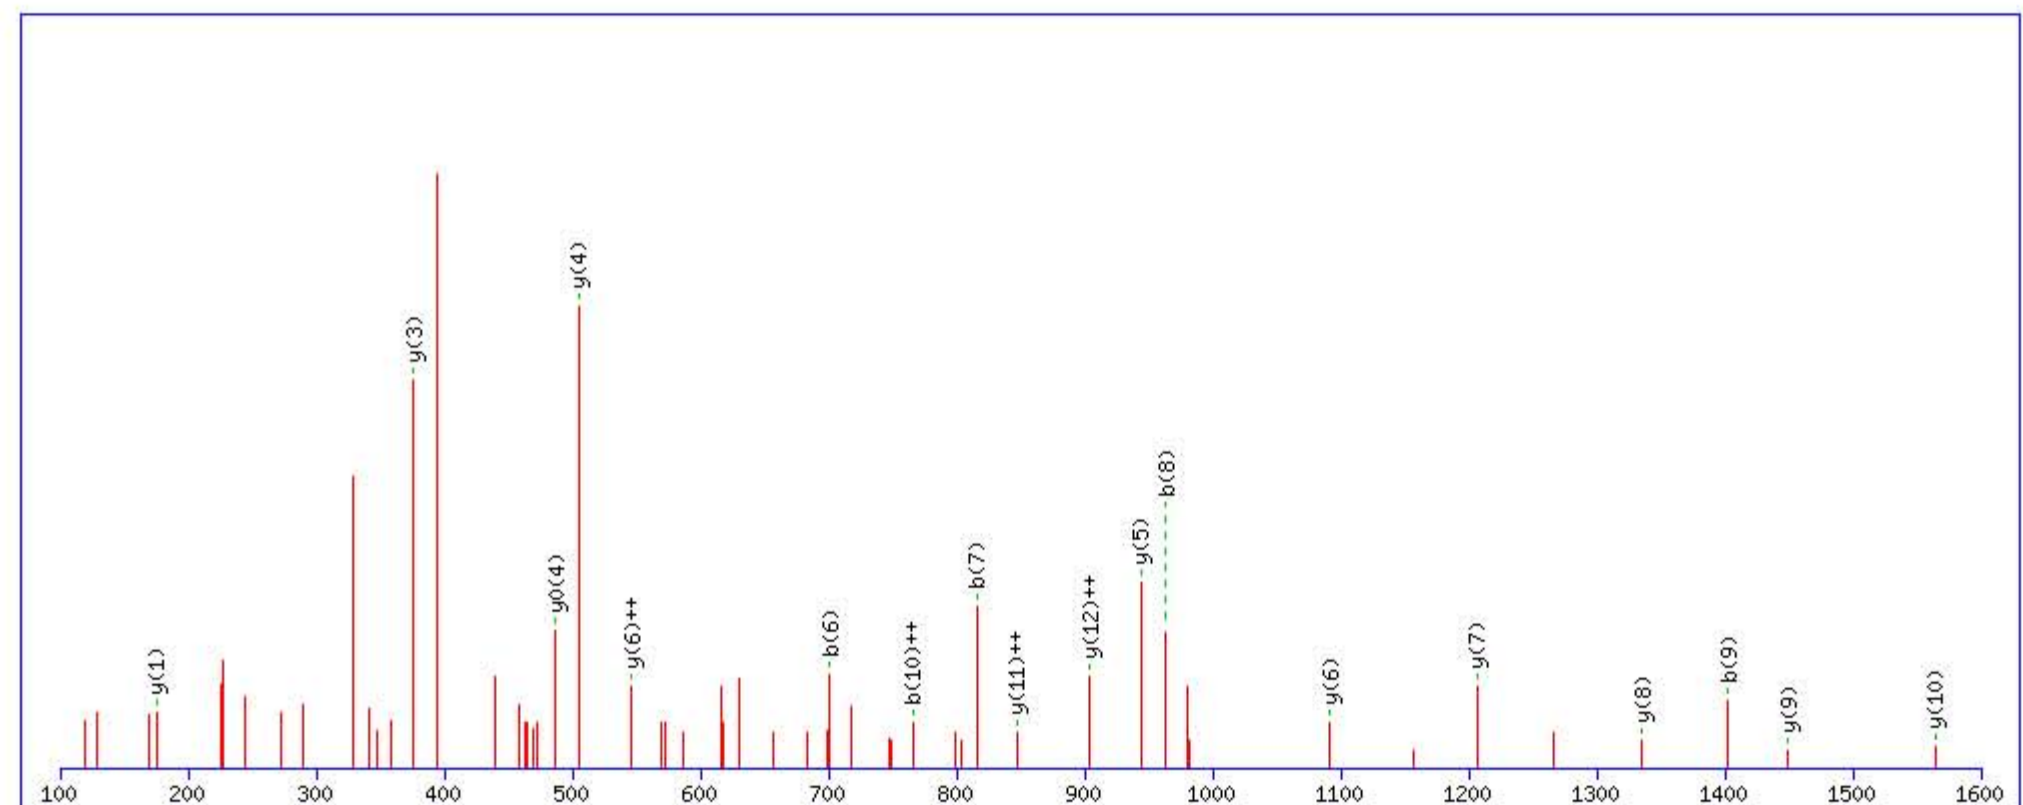

Monoisotopic mass of neutral peptide Mr(calc): 1905.852676

Fixed modifications: Carbamidomethyl (C) (apply to specified residues or termini only)

Variable modifications:

Q9 : Biotin:Thermo-21345 (Q)

Ions Score: 61 Expect: 7.6e-006

Matches : 18/134 fragment ions using 26 most intense peaks ([help](#))

| #  | b           | b <sup>++</sup> | b <sup>*</sup> | b <sup>*++</sup> | b <sup>0</sup> | b <sup>0++</sup> | Seq. | y           | y <sup>++</sup> | y <sup>*</sup> | y <sup>*++</sup> | y <sup>0</sup> | y <sup>0++</sup> | #  |
|----|-------------|-----------------|----------------|------------------|----------------|------------------|------|-------------|-----------------|----------------|------------------|----------------|------------------|----|
| 1  | 100.075690  | 50.541483       |                |                  |                |                  | V    |             |                 |                |                  |                |                  | 13 |
| 2  | 215.102633  | 108.054954      |                |                  | 197.092068     | 99.049672        | D    | 1807.791552 | 904.399414      | 1790.765003    | 895.886140       | 1789.780987    | 895.394132       | 12 |
| 3  | 343.197596  | 172.102436      | 326.171047     | 163.589162       | 325.187031     | 163.097154       | K    | 1692.764609 | 846.885943      | 1675.738060    | 838.372668       | 1674.754044    | 837.880660       | 11 |
| 4  | 458.224539  | 229.615908      | 441.197990     | 221.102633       | 440.213974     | 220.610625       | D    | 1564.669646 | 782.838461      | 1547.643097    | 774.325187       | 1546.659081    | 773.833179       | 10 |
| 5  | 572.267466  | 286.637371      | 555.240917     | 278.124097       | 554.256901     | 277.632089       | N    | 1449.642703 | 725.324990      | 1432.616154    | 716.811715       | 1431.632138    | 716.319707       | 9  |
| 6  | 701.310059  | 351.158668      | 684.283510     | 342.645393       | 683.299494     | 342.153385       | E    | 1335.599776 | 668.303526      | 1318.573227    | 659.790252       | 1317.589211    | 659.298244       | 8  |
| 7  | 816.337002  | 408.672139      | 799.310453     | 400.158865       | 798.326437     | 399.666857       | D    | 1206.557183 | 603.782230      | 1189.530634    | 595.268955       | 1188.546618    | 594.776947       | 7  |
| 8  | 963.405416  | 482.206346      | 946.378867     | 473.693072       | 945.394851     | 473.201064       | F    | 1091.530240 | 546.268758      | 1074.503691    | 537.755484       | 1073.519675    | 537.263476       | 6  |
| 9  | 1402.630742 | 701.819009      | 1385.604193    | 693.305735       | 1384.620177    | 692.813727       | Q    | 944.461826  | 472.734551      | 927.435277     | 464.221277       | 926.451261     | 463.729269       | 5  |
| 10 | 1531.673335 | 766.340306      | 1514.646786    | 757.827031       | 1513.662770    | 757.335023       | E    | 505.236500  | 253.121888      | 488.209951     | 244.608614       | 487.225935     | 244.116606       | 4  |
| 11 | 1618.705363 | 809.856320      | 1601.678814    | 801.343045       | 1600.694798    | 800.851037       | S    | 376.193907  | 188.600591      | 359.167358     | 180.087317       | 358.183342     | 179.595309       | 3  |
| 12 | 1732.748290 | 866.877783      | 1715.721741    | 858.364509       | 1714.737725    | 857.872501       | N    | 289.161879  | 145.084577      | 272.135330     | 136.571303       |                |                  | 2  |
| 13 |             |                 |                |                  |                |                  | R    | 175.118952  | 88.063114       | 158.092403     | 79.549839        |                |                  | 1  |

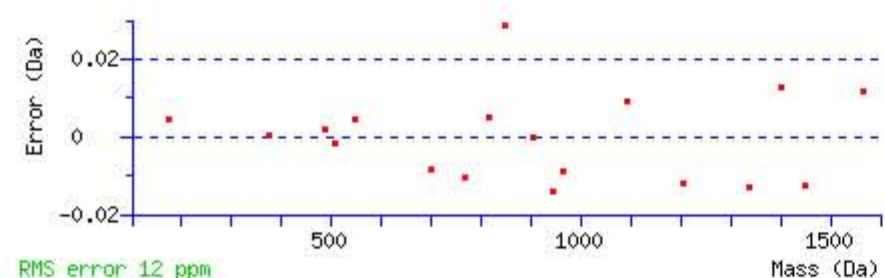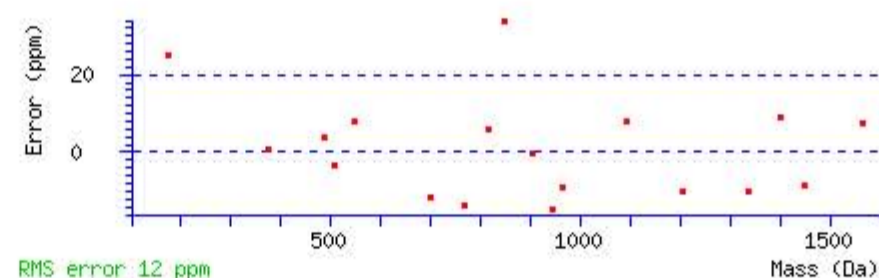

NCBI BLAST search of **VDKDNEDFQESNR**

(Parameters: blastp, nr protein database, expect=20000, no filter, PAM30)

Other BLAST [web gateways](#)

All matches to this query

| Score | Mr(calc):   | Delta     | Sequence                      |
|-------|-------------|-----------|-------------------------------|
| 60.8  | 1905.852676 | -0.006724 | <a href="#">VDKDNEDFQESNR</a> |

Mascot: <http://www.matrixscience.com/>













MATRIX SCIENCE Mascot Search Results

Peptide View

MS/MS Fragmentation of QQTHMLDVMQDHF SR
Found in CLUS\_HUMAN, Clusterin OS=Homo sapiens GN=CLU PE=1 SV=1

Match to Query 42940: 2183.002056 from(546.757790,4+) rtinseconds(2035) index(32089)
Title: Locus:1.1.1.3372.4 File:"2013-07-02 CLN FXIII 180 min 3rd F 3.wiff"
Data file C:\Program Files (x86)\Matrix Science\Mascot Daemon\mgf\9 FXIII 180 min 3rd\mascot\_daemon\_merge.mgf

Click mouse within plot area to zoom in by factor of two about that point

Or, Plot from 100 to 1500 Da Full range

Label all possible matches Label matches used for scoring

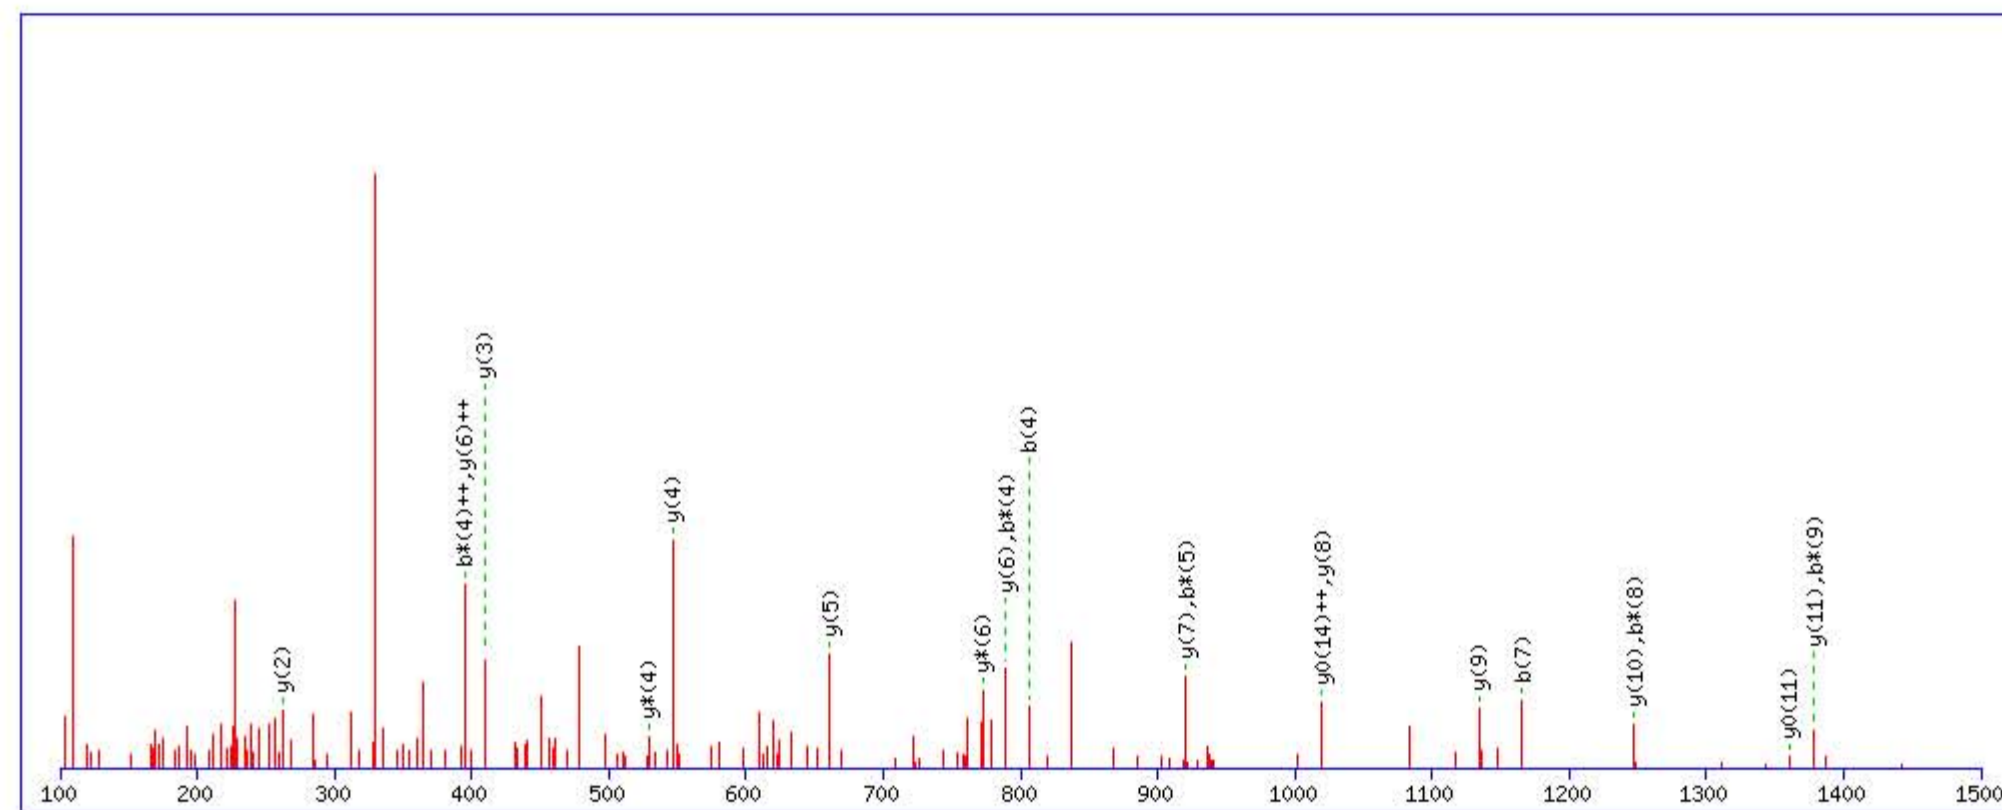

Monoisotopic mass of neutral peptide Mr(calc): 2183.007446
Fixed modifications: Carbamidomethyl (C) (apply to specified residues or termini only)
Variable modifications: Biotin:Thermo-21345 (Q)
Ions Score: 65 Expect: 3.8e-006
Matches: 22/162 fragment ions using 27 most intense peaks

Table with 14 columns: #, b, b++, b+, b+--, b0, b0++, Seq., y, y++, y\*, y+--, y0, y0++, #. It lists 15 peptide fragments with their corresponding masses and sequence positions.

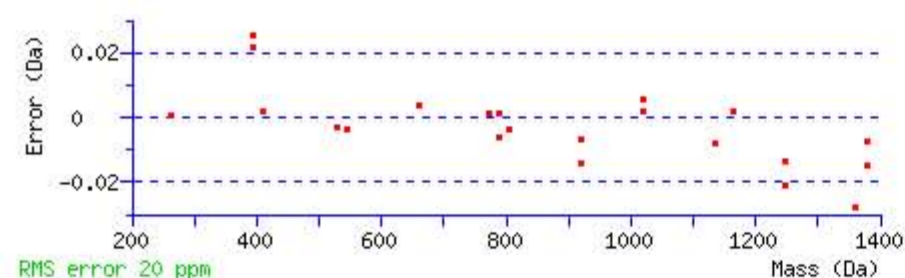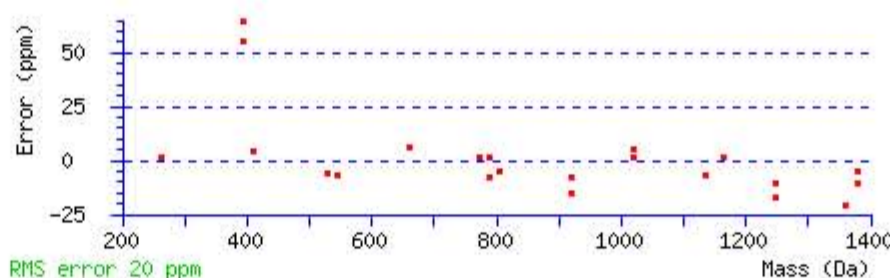

NCBI BLAST search of QQTHMLDVMQDHF SR
Parameters: blastp, nr protein database, expect=20000, no filter, PAM30

All matches to this query

Small table with 4 columns: Score, Mr(calc), Delta, Sequence. Shows a perfect match for the peptide QQTHMLDVMQDHF SR.

Mascot: http://www.matrixscience.com/





**{MATRIX} SCIENCE Mascot Search Results**

**Peptide View**

MS/MS Fragmentation of **VSVSQTSK**  
 Found in **FA9\_HUMAN**, Coagulation factor IX OS=Homo sapiens GN=F9 PE=1 SV=2

Match to Query 16126: 1145.608668 from(573.811610,2+) rtinseconds(1440) index(42497)  
 Title: Locus:1.1.1.3214.17 File:"2013-07-02 CLN FXIII 180 min 3rd F 4.wiff"  
 Data file C:\Program Files (x86)\Matrix Science\Mascot Daemon\mgf9 FXIII 180 min 3rd\mascot\_daemon\_merge.mgf

Click mouse within plot area to zoom in by factor of two about that point

Or,  Plot from  100  to  1500  Da  Full range

Label all possible matches  Label matches used for scoring

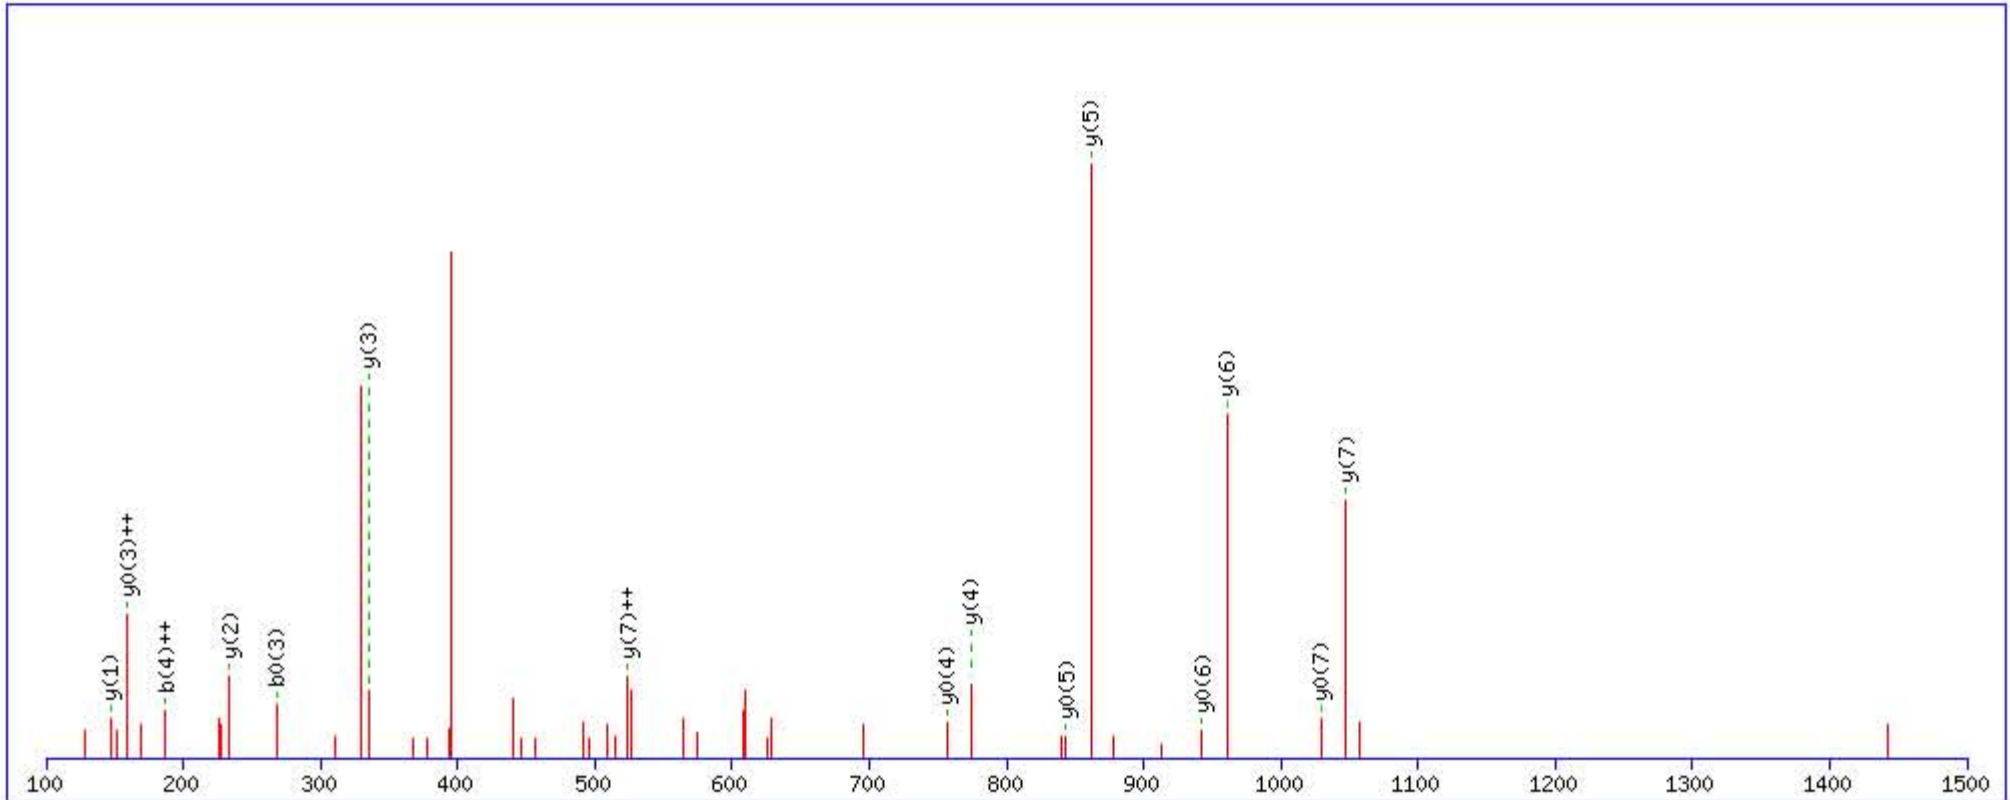

Monoisotopic mass of neutral peptide Mr(calc): 1145.611450  
 Fixed modifications: Carbamidomethyl (C) (apply to specified residues or termini only)  
 Variable modifications:  
 Q5 : Biotin:Thermo-21345 (Q)  
 Ions Score: 43 Expect: 0.00055  
 Matches : 16/72 fragment ions using 26 most intense peaks [\(help\)](#)

| # | b           | b <sup>++</sup> | b*         | b <sup>+++</sup> | b <sup>0</sup> | b <sup>0++</sup> | Seq. | y           | y <sup>++</sup> | y*          | y <sup>+++</sup> | y <sup>0</sup> | y <sup>0++</sup> | # |
|---|-------------|-----------------|------------|------------------|----------------|------------------|------|-------------|-----------------|-------------|------------------|----------------|------------------|---|
| 1 | 100.075690  | 50.541483       |            |                  |                |                  | V    |             |                 |             |                  |                |                  | 8 |
| 2 | 187.107718  | 94.057497       |            |                  | 169.097153     | 85.052214        | S    | 1047.550307 | 524.278792      | 1030.523758 | 515.765517       | 1029.539742    | 515.273509       | 7 |
| 3 | 286.176132  | 143.591704      |            |                  | 268.165567     | 134.586422       | V    | 960.518279  | 480.762778      | 943.491730  | 472.249503       | 942.507714     | 471.757495       | 6 |
| 4 | 373.208160  | 187.107718      |            |                  | 355.197595     | 178.102435       | S    | 861.449865  | 431.228571      | 844.423316  | 422.715296       | 843.439300     | 422.223288       | 5 |
| 5 | 812.433486  | 406.720381      | 795.406937 | 398.207107       | 794.422921     | 397.715099       | Q    | 774.417837  | 387.712557      | 757.391288  | 379.199282       | 756.407272     | 378.707274       | 4 |
| 6 | 913.481165  | 457.244221      | 896.454616 | 448.730946       | 895.470600     | 448.238938       | T    | 335.192511  | 168.099893      | 318.165962  | 159.586619       | 317.181946     | 159.094611       | 3 |
| 7 | 1000.513193 | 500.760235      | 983.486644 | 492.246960       | 982.502628     | 491.754952       | S    | 234.144832  | 117.576054      | 217.118283  | 109.062779       | 216.134267     | 108.570771       | 2 |
| 8 |             |                 |            |                  |                |                  | K    | 147.112804  | 74.060040       | 130.086255  | 65.546765        |                |                  | 1 |

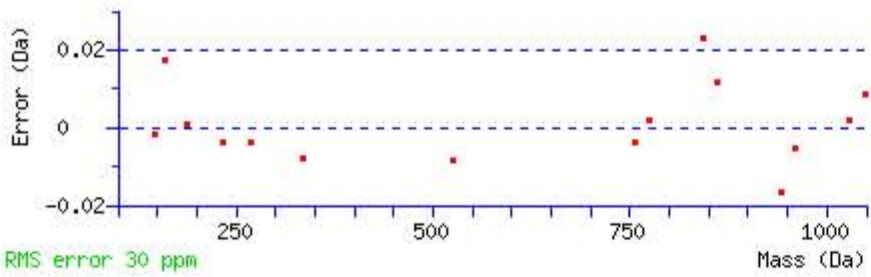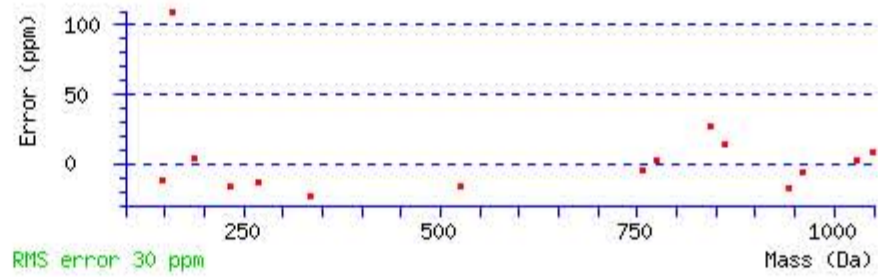

NCBI BLAST search of **VSVSQTSK**  
 (Parameters: blastp, nr protein database, expect=20000, no filter, PAM30)  
 Other BLAST [web gateways](#)

**All matches to this query**

| Score | Mr(calc):   | Delta     | Sequence                    |
|-------|-------------|-----------|-----------------------------|
| 43.0  | 1145.611450 | -0.002782 | <a href="#">VSVSQTSK</a>    |
| 7.8   | 1145.592819 | 0.015849  | <a href="#">VSDGVTKSPEK</a> |
| 4.3   | 1145.622650 | -0.013982 | <a href="#">VDNAMSRLLK</a>  |
| 0.5   | 1145.623337 | -0.014669 | <a href="#">WVDGGKPLFK</a>  |



# **MASCOT** Mascot Search Results

## Peptide View

MS/MS Fragmentation of **SALVLQYLR**

Found in **FA9\_HUMAN**, Coagulation factor IX OS=Homo sapiens GN=F9 PE=1 SV=2

Match to Query 22753: 1372.796088 from(687.405320,2+) rtinseconds(2435) index(48511)

Title: Locus:1.1.1.3560.7 File:"2013-07-02 CLN FXIII 180 min 3rd F 4.wiff"

Data file C:\Program Files (x86)\Matrix Science\Mascot Daemon\mgf9 FXIII 180 min 3rd\mascot\_daemon\_merge.mgf

Click mouse within plot area to zoom in by factor of two about that point

Or, Plot from  to  Da

Label all possible matches  Label matches used for scoring

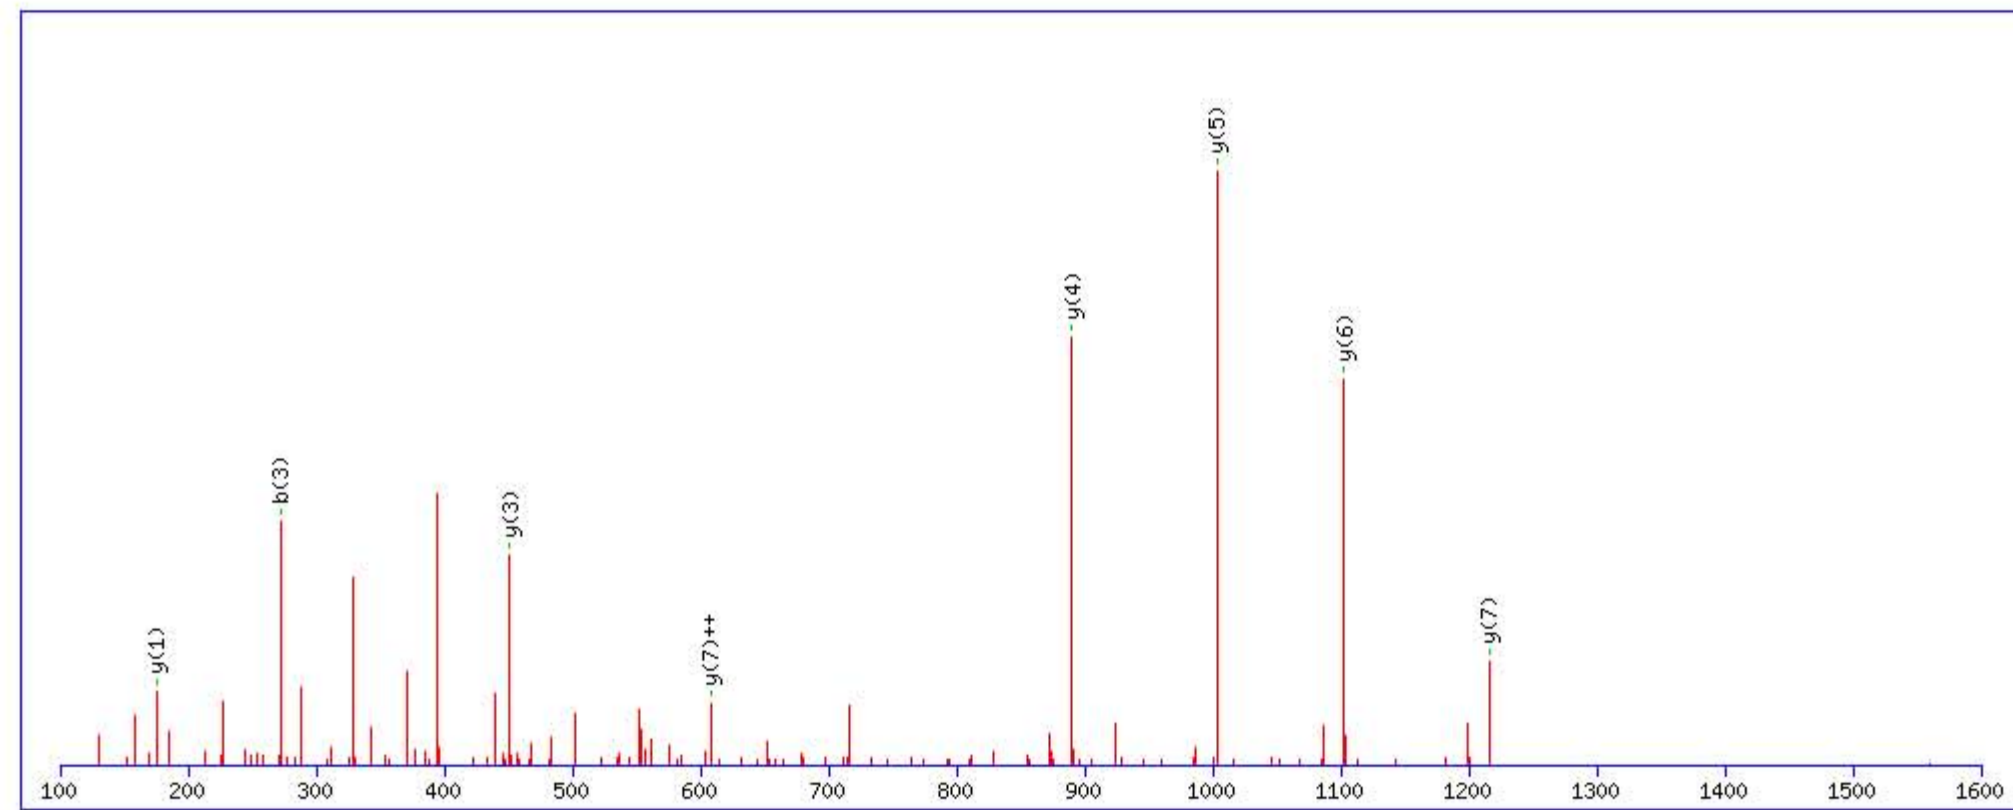

Monoisotopic mass of neutral peptide Mr(calc): 1372.790054

Fixed modifications: Carbamidomethyl (C) (apply to specified residues or termini only)

Variable modifications:

Q6 : Biotin:Thermo-21345 (Q)

Ions Score: 47 Expect: 7.8e-005

Matches : 8/70 fragment ions using 11 most intense peaks [\(help\)](#)

| # | b                 | b <sup>++</sup> | b <sup>*</sup> | b <sup>*++</sup> | b <sup>0</sup> | b <sup>0++</sup> | Seq. | y                  | y <sup>++</sup>   | y <sup>*</sup> | y <sup>*++</sup> | # |
|---|-------------------|-----------------|----------------|------------------|----------------|------------------|------|--------------------|-------------------|----------------|------------------|---|
| 1 | 88.039304         | 44.523290       |                |                  | 70.028739      | 35.518008        | S    |                    |                   |                |                  | 9 |
| 2 | 159.076418        | 80.041847       |                |                  | 141.065853     | 71.036564        | A    | 1286.765327        | 643.886301        | 1269.738778    | 635.373027       | 8 |
| 3 | <b>272.160482</b> | 136.583879      |                |                  | 254.149917     | 127.578597       | L    | <b>1215.728213</b> | <b>608.367744</b> | 1198.701664    | 599.854470       | 7 |
| 4 | 371.228896        | 186.118086      |                |                  | 353.218331     | 177.112804       | V    | <b>1102.644149</b> | 551.825713        | 1085.617600    | 543.312438       | 6 |
| 5 | 484.312960        | 242.660118      |                |                  | 466.302395     | 233.654836       | L    | <b>1003.575735</b> | 502.291505        | 986.549186     | 493.778231       | 5 |
| 6 | 923.538286        | 462.272781      | 906.511737     | 453.759507       | 905.527721     | 453.267499       | Q    | <b>890.491671</b>  | 445.749473        | 873.465122     | 437.236199       | 4 |
| 7 | 1086.601615       | 543.804446      | 1069.575066    | 535.291171       | 1068.591050    | 534.799163       | Y    | <b>451.266345</b>  | 226.136810        | 434.239796     | 217.623536       | 3 |
| 8 | 1199.685679       | 600.346477      | 1182.659130    | 591.833203       | 1181.675114    | 591.341195       | L    | 288.203016         | 144.605146        | 271.176467     | 136.091871       | 2 |
| 9 |                   |                 |                |                  |                |                  | R    | <b>175.118952</b>  | 88.063114         | 158.092403     | 79.549839        | 1 |

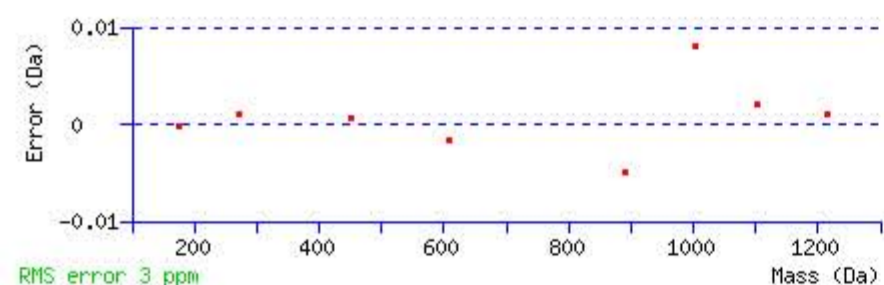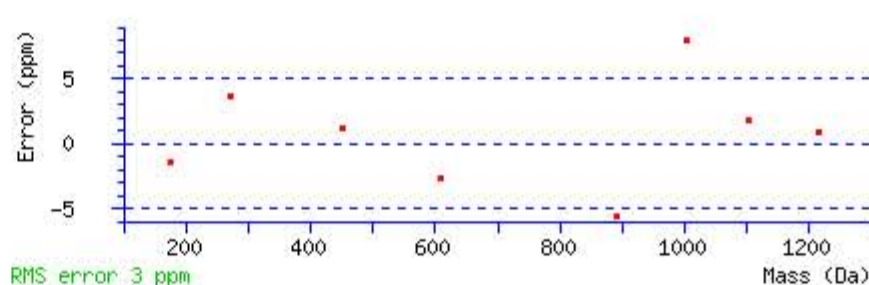

NCBI BLAST search of **SALVLQYLR**

(Parameters: blastp, nr protein database, expect=20000, no filter, PAM30)

Other BLAST [web gateways](#)

All matches to this query

| Score | Mr(calc):   | Delta    | Sequence                      |
|-------|-------------|----------|-------------------------------|
| 46.5  | 1372.790054 | 0.006034 | <a href="#">SALVLQYLR</a>     |
| 2.6   | 1372.790039 | 0.006049 | <a href="#">KELQILYR</a>      |
| 1.6   | 1372.782669 | 0.013419 | <a href="#">LSNKFNSVIPVR</a>  |
| 1.6   | 1372.779999 | 0.016089 | <a href="#">RTGHRIVAPPGGR</a> |
| 1.4   | 1372.790039 | 0.006049 | <a href="#">IIEKYQLR</a>      |
| 0.4   | 1372.778641 | 0.017447 | <a href="#">EKISGTVNIRTR</a>  |
| 0.3   | 1372.779984 | 0.016104 | <a href="#">NIPRRHTLGGPR</a>  |

# MASCOT Search Results

## Peptide View

MS/MS Fragmentation of **ITVVAGEHNIEETEHTQK**

Found in **FA9\_HUMAN**, Coagulation factor IX OS=Homo sapiens GN=F9 PE=1 SV=2

Match to Query 47811: 2474.206896 from(619.559000,4+) rtinseconds(1649) index(43863)

Title: Locus:1.1.1.3287.6 File:"2013-07-02 CLN FXIII 180 min 3rd F 4.wiff"

Data file C:\Program Files (x86)\Matrix Science\Mascot Daemon\mgf\9 FXIII 180 min 3rd\mascot\_daemon\_merge.mgf

Click mouse within plot area to zoom in by factor of two about that point

Or, Plot from  to  Da

Label all possible matches  Label matches used for scoring

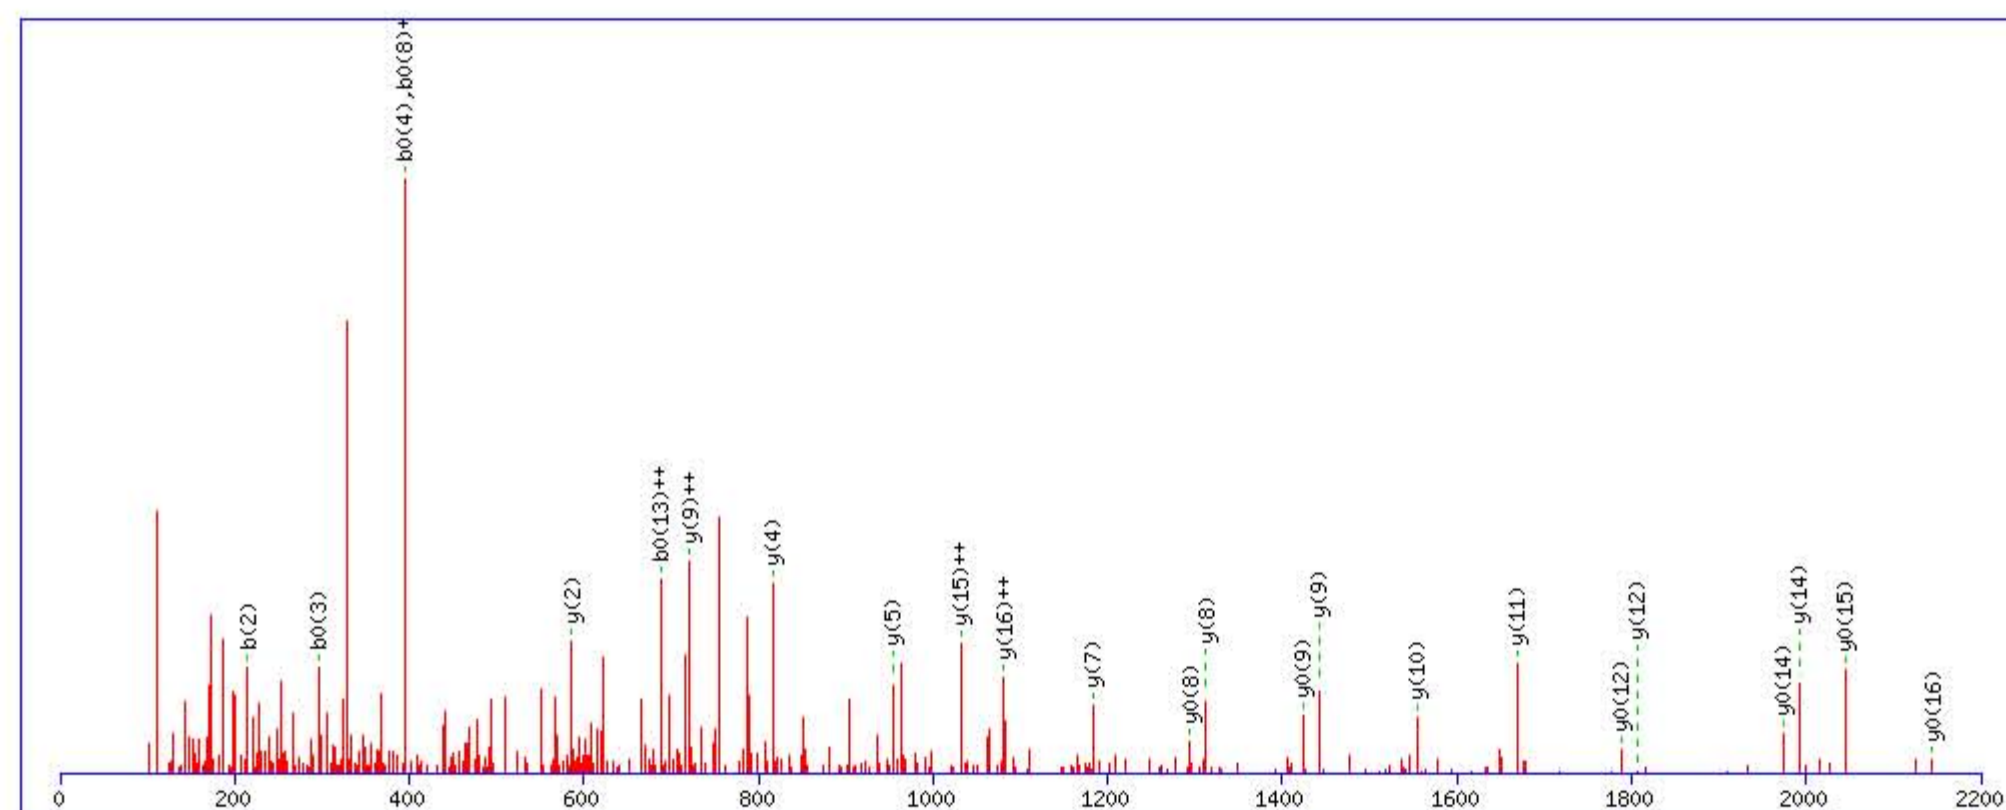

Monoisotopic mass of neutral peptide Mr(calc): 2474.211121

Fixed modifications: Carbamidomethyl (C) (apply to specified residues or termini only)

Variable modifications:

Q18 : Biotin:Thermo-21345 (Q)

Ions Score: 43 Expect: 0.0011

Matches : 24/194 fragment ions using 42 most intense peaks ([help](#))

| #  | b                 | b <sup>++</sup> | b <sup>+</sup> | b <sup>+++</sup> | b <sup>0</sup>    | b <sup>0++</sup>  | Seq. | y                  | y <sup>++</sup>    | y <sup>+</sup> | y <sup>+++</sup> | y <sup>0</sup>     | y <sup>0++</sup> | #  |
|----|-------------------|-----------------|----------------|------------------|-------------------|-------------------|------|--------------------|--------------------|----------------|------------------|--------------------|------------------|----|
| 1  | 114.091340        | 57.549308       |                |                  |                   |                   | I    |                    |                    |                |                  |                    |                  | 19 |
| 2  | <b>215.139019</b> | 108.073147      |                |                  | 197.128454        | 99.067865         | T    | 2362.134353        | 1181.570814        | 2345.107804    | 1173.057540      | 2344.123788        | 1172.565532      | 18 |
| 3  | 314.207433        | 157.607354      |                |                  | <b>296.196868</b> | 148.602072        | V    | 2261.086674        | 1131.046975        | 2244.060125    | 1122.533700      | 2243.076109        | 1122.041692      | 17 |
| 4  | 413.275847        | 207.141561      |                |                  | <b>395.265282</b> | 198.136279        | V    | 2162.018260        | <b>1081.512768</b> | 2144.991711    | 1072.999493      | <b>2144.007695</b> | 1072.507485      | 16 |
| 5  | 484.312961        | 242.660119      |                |                  | 466.302396        | 233.654836        | A    | 2062.949846        | <b>1031.978561</b> | 2045.923297    | 1023.465286      | <b>2044.939281</b> | 1022.973278      | 15 |
| 6  | 541.334425        | 271.170851      |                |                  | 523.323860        | 262.165568        | G    | <b>1991.912732</b> | 996.460004         | 1974.886183    | 987.946730       | <b>1973.902167</b> | 987.454722       | 14 |
| 7  | 670.377018        | 335.692147      |                |                  | 652.366453        | 326.686865        | E    | 1934.891268        | 967.949272         | 1917.864719    | 959.435998       | 1916.880703        | 958.943990       | 13 |
| 8  | 807.435930        | 404.221603      |                |                  | 789.425365        | <b>395.216321</b> | H    | <b>1805.848675</b> | 903.427976         | 1788.822126    | 894.914701       | <b>1787.838110</b> | 894.422693       | 12 |
| 9  | 921.478857        | 461.243067      | 904.452308     | 452.729792       | 903.468292        | 452.237784        | N    | <b>1668.789763</b> | 834.898520         | 1651.763214    | 826.385245       | 1650.779198        | 825.893237       | 11 |
| 10 | 1034.562921       | 517.785099      | 1017.536372    | 509.271824       | 1016.552356       | 508.779816        | I    | <b>1554.746836</b> | 777.877056         | 1537.720287    | 769.363782       | 1536.736271        | 768.871774       | 10 |
| 11 | 1163.605514       | 582.306395      | 1146.578965    | 573.793121       | 1145.594949       | 573.301113        | E    | <b>1441.662772</b> | <b>721.335024</b>  | 1424.636223    | 712.821750       | <b>1423.652207</b> | 712.329742       | 9  |
| 12 | 1292.648107       | 646.827692      | 1275.621558    | 638.314417       | 1274.637542       | 637.822409        | E    | <b>1312.620179</b> | 656.813728         | 1295.593630    | 648.300453       | <b>1294.609614</b> | 647.808445       | 8  |
| 13 | 1393.695786       | 697.351531      | 1376.669237    | 688.838257       | 1375.685221       | <b>688.346249</b> | T    | <b>1183.577586</b> | 592.292431         | 1166.551037    | 583.779157       | 1165.567021        | 583.287149       | 7  |
| 14 | 1522.738379       | 761.872828      | 1505.711830    | 753.359553       | 1504.727814       | 752.867545        | E    | 1082.529907        | 541.768592         | 1065.503358    | 533.255317       | 1064.519342        | 532.763309       | 6  |
| 15 | 1659.797291       | 830.402284      | 1642.770742    | 821.889009       | 1641.786726       | 821.397001        | H    | <b>953.487314</b>  | 477.247295         | 936.460765     | 468.734021       | 935.476749         | 468.242013       | 5  |
| 16 | 1760.844970       | 880.926123      | 1743.818421    | 872.412849       | 1742.834405       | 871.920841        | T    | <b>816.428402</b>  | 408.717839         | 799.401853     | 400.204565       | 798.417837         | 399.712557       | 4  |
| 17 | 1889.887563       | 945.447420      | 1872.861014    | 936.934145       | 1871.876998       | 936.442137        | E    | 715.380723         | 358.194000         | 698.354174     | 349.680725       | 697.370158         | 349.188717       | 3  |
| 18 | 2329.112889       | 1165.060082     | 2312.086340    | 1156.546808      | 2311.102324       | 1156.054800       | Q    | <b>586.338130</b>  | 293.672703         | 569.311581     | 285.159429       |                    |                  | 2  |
| 19 |                   |                 |                |                  |                   |                   | K    | 147.112804         | 74.060040          | 130.086255     | 65.546765        |                    |                  | 1  |

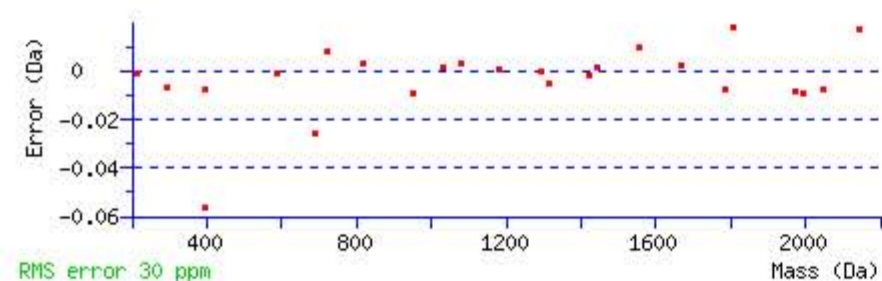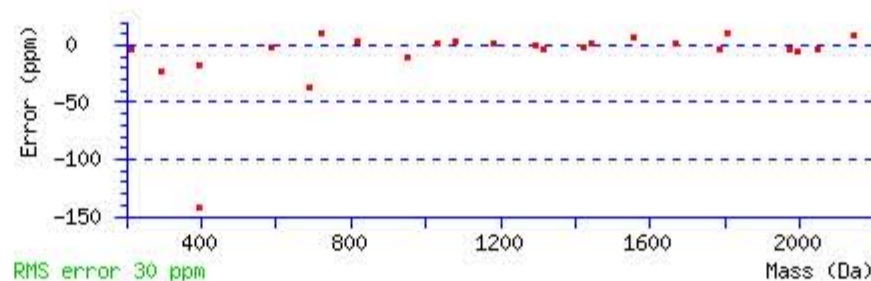

NCBI BLAST search of [ITVVAGEHNIEETEHTQK](#)

(Parameters: blastp, nr protein database, expect=20000, no filter, PAM30)

Other BLAST [web gateways](#)

All matches to this query

| Score | Mr(calc):   | Delta     | Sequence                           |
|-------|-------------|-----------|------------------------------------|
| 43.3  | 2474.211121 | -0.004225 | <a href="#">ITVVAGEHNIEETEHTQK</a> |

Mascot: <http://www.matrixscience.com/>

# MASCOT SEARCH RESULTS

## Peptide View

MS/MS Fragmentation of **SQHLDNFSNQIGK**

Found in **FA5\_HUMAN**, Coagulation factor V OS=Homo sapiens GN=F5 PE=1 SV=4

Match to Query 35667: 1797.879012 from(600.300280,3+) rtinseconds(1804) index(44780)

Title: Locus:1.1.1.3341.10 File:"2013-07-02 CLN FXIII 180 min 3rd F 4.wiff"

Data file C:\Program Files (x86)\Matrix Science\Mascot Daemon\mgf9 FXIII 180 min 3rd\mascot\_daemon\_merge.mgf

Click mouse within plot area to zoom in by factor of two about that point

Or, Plot from  to  Da

Label all possible matches  Label matches used for scoring

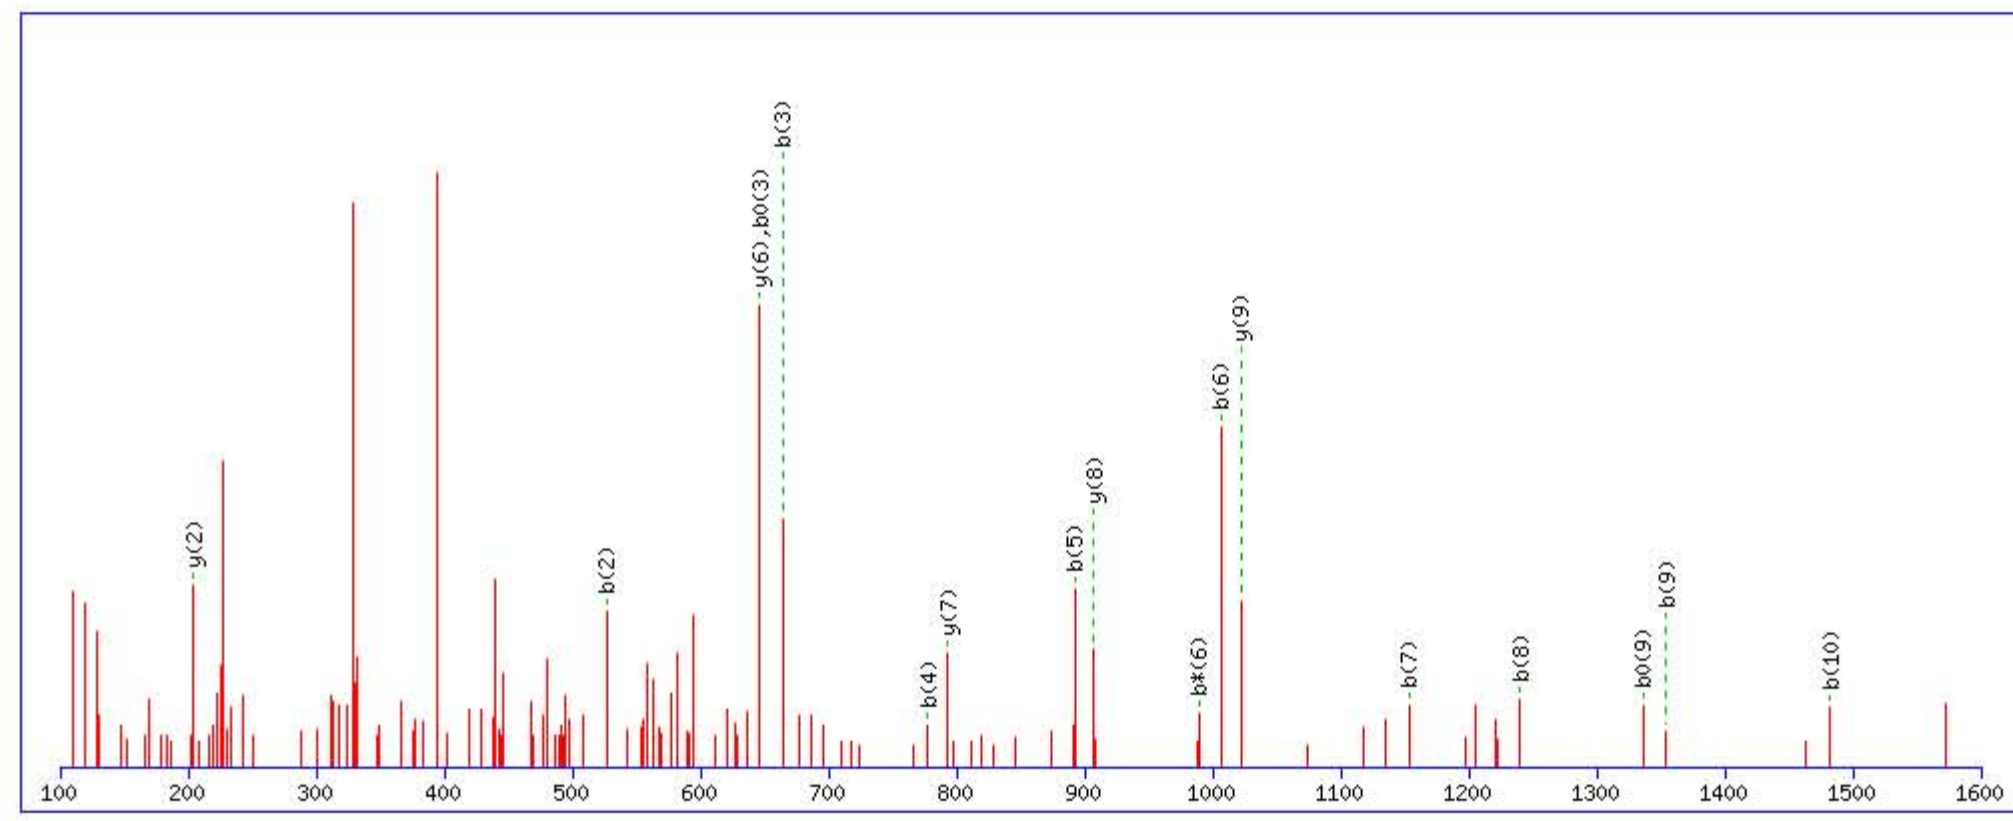

Monoisotopic mass of neutral peptide Mr(calc): 1797.883194

Fixed modifications: Carbamidomethyl (C) (apply to specified residues or termini only)

Variable modifications:

Q2 : Biotin:Thermo-21345 (Q)

Ions Score: 53 Expect: 3.5e-005

Matches : 17/132 fragment ions using 29 most intense peaks [\(help\)](#)

| #  | b                  | b <sup>++</sup> | b <sup>*</sup>    | b <sup>*++</sup> | b <sup>0</sup>     | b <sup>0++</sup> | Seq. | y                  | y <sup>++</sup> | y <sup>*</sup> | y <sup>*++</sup> | y <sup>0</sup> | y <sup>0++</sup> | #  |
|----|--------------------|-----------------|-------------------|------------------|--------------------|------------------|------|--------------------|-----------------|----------------|------------------|----------------|------------------|----|
| 1  | 88.039304          | 44.523290       |                   |                  | 70.028739          | 35.518008        | S    |                    |                 |                |                  |                |                  | 13 |
| 2  | <b>527.264630</b>  | 264.135953      | 510.238081        | 255.622679       | 509.254065         | 255.130671       | Q    | 1711.858451        | 856.432863      | 1694.831902    | 847.919589       | 1693.847886    | 847.427581       | 12 |
| 3  | <b>664.323542</b>  | 332.665409      | 647.296993        | 324.152134       | <b>646.312977</b>  | 323.660126       | H    | 1272.633125        | 636.820200      | 1255.606576    | 628.306926       | 1254.622560    | 627.814918       | 11 |
| 4  | <b>777.407606</b>  | 389.207441      | 760.381057        | 380.694166       | 759.397041         | 380.202159       | L    | 1135.574213        | 568.290744      | 1118.547664    | 559.777470       | 1117.563648    | 559.285462       | 10 |
| 5  | <b>892.434549</b>  | 446.720913      | 875.408000        | 438.207638       | 874.423984         | 437.715630       | D    | <b>1022.490149</b> | 511.748712      | 1005.463600    | 503.235438       | 1004.479584    | 502.743430       | 9  |
| 6  | <b>1006.477476</b> | 503.742376      | <b>989.450927</b> | 495.229101       | 988.466911         | 494.737093       | N    | <b>907.463206</b>  | 454.235241      | 890.436657     | 445.721966       | 889.452641     | 445.229958       | 8  |
| 7  | <b>1153.545890</b> | 577.276583      | 1136.519341       | 568.763308       | 1135.535325        | 568.271300       | F    | <b>793.420279</b>  | 397.213777      | 776.393730     | 388.700503       | 775.409714     | 388.208495       | 7  |
| 8  | <b>1240.577918</b> | 620.792597      | 1223.551369       | 612.279323       | 1222.567353        | 611.787314       | S    | <b>646.351865</b>  | 323.679570      | 629.325316     | 315.166296       | 628.341300     | 314.674288       | 6  |
| 9  | <b>1354.620845</b> | 677.814060      | 1337.594296       | 669.300786       | <b>1336.610280</b> | 668.808778       | N    | 559.319837         | 280.163556      | 542.293288     | 271.650282       |                |                  | 5  |
| 10 | <b>1482.679423</b> | 741.843349      | 1465.652874       | 733.330075       | 1464.668858        | 732.838067       | Q    | 445.276910         | 223.142093      | 428.250361     | 214.628818       |                |                  | 4  |
| 11 | 1595.763487        | 798.385381      | 1578.736938       | 789.872107       | 1577.752922        | 789.380099       | I    | 317.218332         | 159.112804      | 300.191783     | 150.599529       |                |                  | 3  |
| 12 | 1652.784951        | 826.896113      | 1635.758402       | 818.382839       | 1634.774386        | 817.890831       | G    | <b>204.134268</b>  | 102.570772      | 187.107719     | 94.057497        |                |                  | 2  |
| 13 |                    |                 |                   |                  |                    |                  | K    | 147.112804         | 74.060040       | 130.086255     | 65.546765        |                |                  | 1  |

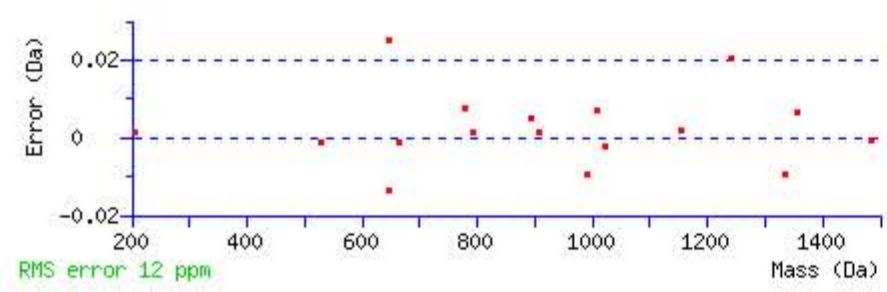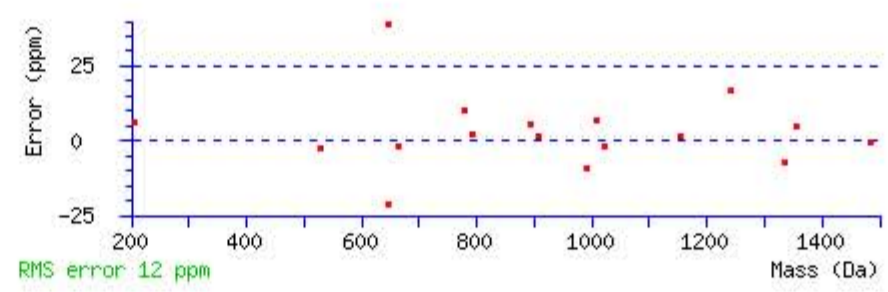

NCBI BLAST search of **SQHLDNFSNQIGK**

(Parameters: blastp, nr protein database, expect=20000, no filter, PAM30)

Other BLAST [web gateways](#)

All matches to this query

| Score | Mr(calc):   | Delta     | Sequence                       |
|-------|-------------|-----------|--------------------------------|
| 52.6  | 1797.883194 | -0.004182 | <a href="#">SQHLDNFSNQIGK</a>  |
| 5.0   | 1797.872604 | 0.006408  | <a href="#">KWDFSKYYVSNFSK</a> |

# MASCOT Search Results

## Peptide View

MS/MS Fragmentation of **APSHQQATTAGSPLR**

Found in **FA5\_HUMAN**, Coagulation factor V OS=Homo sapiens GN=F5 PE=1 SV=4

Match to Query 36345: 1831.933902 from(611.651910,3+) rtinseconds(1449) index(42567)

Title: Locus:1.1.1.3217.18 File:"2013-07-02 CLN FXIII 180 min 3rd F 4.wiff"

Data file C:\Program Files (x86)\Matrix Science\Mascot Daemon\mgf\9 FXIII 180 min 3rd\mascot\_daemon\_merge.mgf

Click mouse within plot area to zoom in by factor of two about that point

Or, Plot from  to  Da

Label all possible matches  Label matches used for scoring

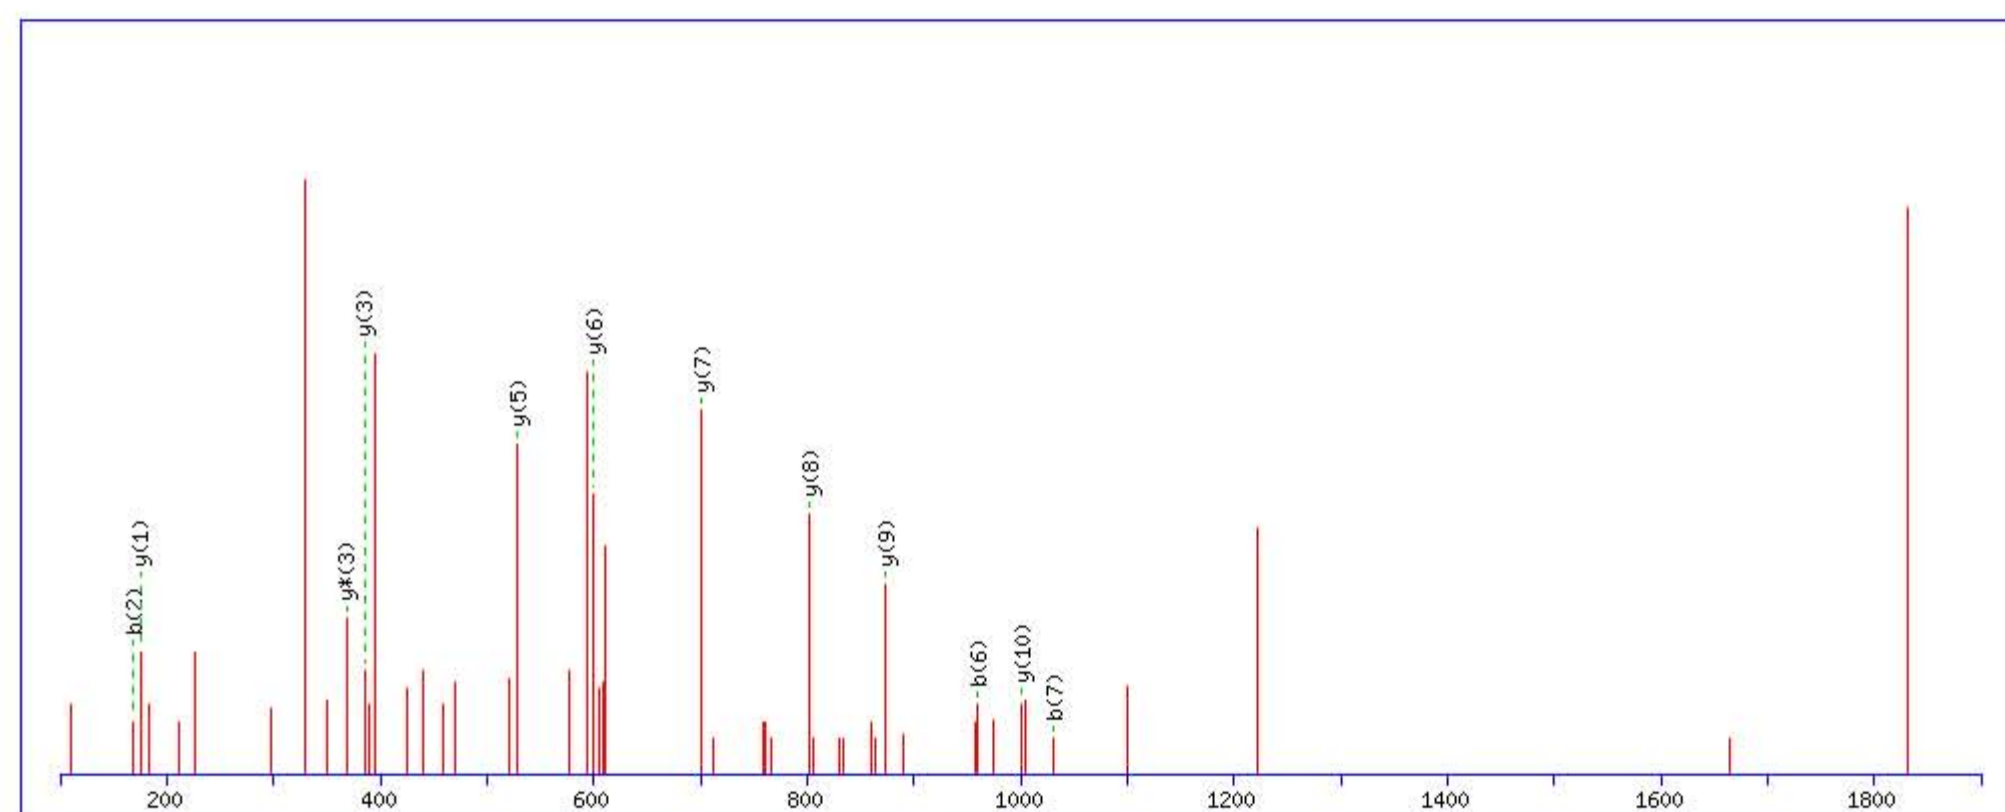

Monoisotopic mass of neutral peptide  $M_r(\text{calc})$ : 1831.936295

Fixed modifications: Carbamidomethyl (C) (apply to specified residues or termini only)

Variable modifications:

Q5 : Biotin:Thermo-21345 (Q)

Ions Score: 27 Expect: 0.0098

Matches : 12/150 fragment ions using 38 most intense peaks [\(help\)](#)

| #  | b                  | b <sup>++</sup> | b*          | b <sup>+++</sup> | b <sup>0</sup> | b <sup>0++</sup> | Seq. | y                  | y <sup>++</sup> | y*                | y <sup>+++</sup> | y <sup>0</sup> | y <sup>0++</sup> | #  |
|----|--------------------|-----------------|-------------|------------------|----------------|------------------|------|--------------------|-----------------|-------------------|------------------|----------------|------------------|----|
| 1  | 72.044390          | 36.525833       |             |                  |                |                  | A    |                    |                 |                   |                  |                |                  | 15 |
| 2  | <b>169.097154</b>  | 85.052215       |             |                  |                |                  | P    | 1761.906466        | 881.456871      | 1744.879917       | 872.943597       | 1743.895901    | 872.451588       | 14 |
| 3  | 256.129182         | 128.568229      |             |                  | 238.118617     | 119.562947       | S    | 1664.853702        | 832.930489      | 1647.827153       | 824.417215       | 1646.843137    | 823.925206       | 13 |
| 4  | 393.188094         | 197.097685      |             |                  | 375.177529     | 188.092402       | H    | 1577.821674        | 789.414475      | 1560.795125       | 780.901200       | 1559.811109    | 780.409192       | 12 |
| 5  | 832.413420         | 416.710348      | 815.386871  | 408.197073       | 814.402855     | 407.705065       | Q    | 1440.762762        | 720.885019      | 1423.736213       | 712.371744       | 1422.752197    | 711.879736       | 11 |
| 6  | <b>960.471998</b>  | 480.739637      | 943.445449  | 472.226362       | 942.461433     | 471.734354       | Q    | <b>1001.537436</b> | 501.272356      | 984.510887        | 492.759081       | 983.526871     | 492.267073       | 10 |
| 7  | <b>1031.509112</b> | 516.258194      | 1014.482563 | 507.744919       | 1013.498547    | 507.252911       | A    | <b>873.478858</b>  | 437.243067      | 856.452309        | 428.729792       | 855.468293     | 428.237784       | 9  |
| 8  | 1132.556791        | 566.782034      | 1115.530242 | 558.268759       | 1114.546226    | 557.776751       | T    | <b>802.441744</b>  | 401.724510      | 785.415195        | 393.211235       | 784.431179     | 392.719227       | 8  |
| 9  | 1233.604470        | 617.305873      | 1216.577921 | 608.792599       | 1215.593905    | 608.300591       | T    | <b>701.394065</b>  | 351.200671      | 684.367516        | 342.687396       | 683.383500     | 342.195388       | 7  |
| 10 | 1304.641584        | 652.824430      | 1287.615035 | 644.311156       | 1286.631019    | 643.819147       | A    | <b>600.346386</b>  | 300.676831      | 583.319837        | 292.163556       | 582.335821     | 291.671548       | 6  |
| 11 | 1361.663048        | 681.335162      | 1344.636499 | 672.821888       | 1343.652483    | 672.329879       | G    | <b>529.309272</b>  | 265.158274      | 512.282723        | 256.644999       | 511.298707     | 256.152991       | 5  |
| 12 | 1448.695076        | 724.851176      | 1431.668527 | 716.337902       | 1430.684511    | 715.845893       | S    | 472.287808         | 236.647542      | 455.261259        | 228.134267       | 454.277243     | 227.642259       | 4  |
| 13 | 1545.747840        | 773.377558      | 1528.721291 | 764.864284       | 1527.737275    | 764.372276       | P    | <b>385.255780</b>  | 193.131528      | <b>368.229231</b> | 184.618253       |                |                  | 3  |
| 14 | 1658.831904        | 829.919590      | 1641.805355 | 821.406316       | 1640.821339    | 820.914307       | L    | 288.203016         | 144.605146      | 271.176467        | 136.091871       |                |                  | 2  |
| 15 |                    |                 |             |                  |                |                  | R    | <b>175.118952</b>  | 88.063114       | 158.092403        | 79.549839        |                |                  | 1  |

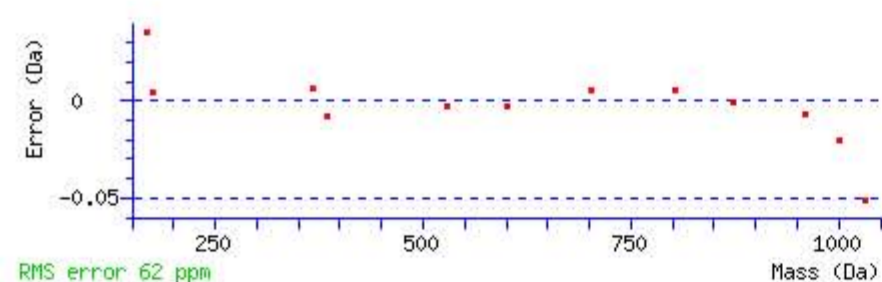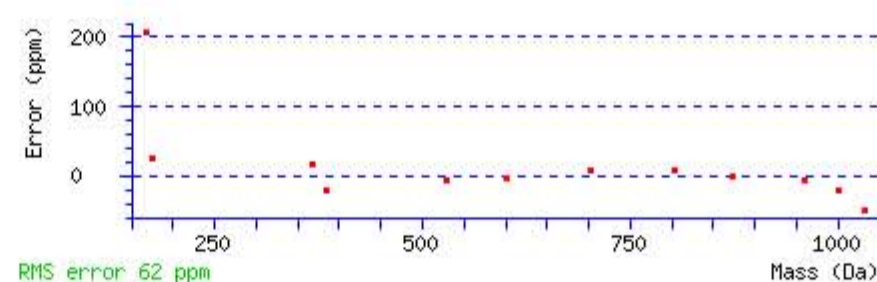

NCBI BLAST search of **APSHQQATTAGSPLR**

(Parameters: blastp, nr protein database, expect=20000, no filter, PAM30)

Other BLAST [web gateways](#)

### All matches to this query

| Score | $M_r(\text{calc})$ | Delta     | Sequence                          |
|-------|--------------------|-----------|-----------------------------------|
| 27.0  | 1831.936295        | -0.002393 | <a href="#">APSHQQATTAGSPLR</a>   |
| 19.2  | 1831.936295        | -0.002393 | <a href="#">APSHQQATTAGSPLR</a>   |
| 5.5   | 1831.916336        | 0.017566  | <a href="#">VQTTADSVSDEAELLVR</a> |
| 3.7   | 1831.954041        | -0.020139 | <a href="#">HSDLPPSKKGEQPLSR</a>  |

# MASCOT Search Results

## Peptide View

MS/MS Fragmentation of **MPMGLSTGIISDSQIK**

Found in **FA5\_HUMAN**, Coagulation factor V OS=Homo sapiens GN=F5 PE=1 SV=4

Match to Query 39074: 1988.018712 from(663.680180,3+) rtinseconds(2475) index(48662)

Title: Locus:1.1.1.3574.6 File:"2013-07-02 CLN FXIII 180 min 3rd F 4.wiff"

Data file C:\Program Files (x86)\Matrix Science\Mascot Daemon\mgf9 FXIII 180 min 3rd\mascot\_daemon\_merge.mgf

Click mouse within plot area to zoom in by factor of two about that point

Or, Plot from  to  Da

Label all possible matches  Label matches used for scoring

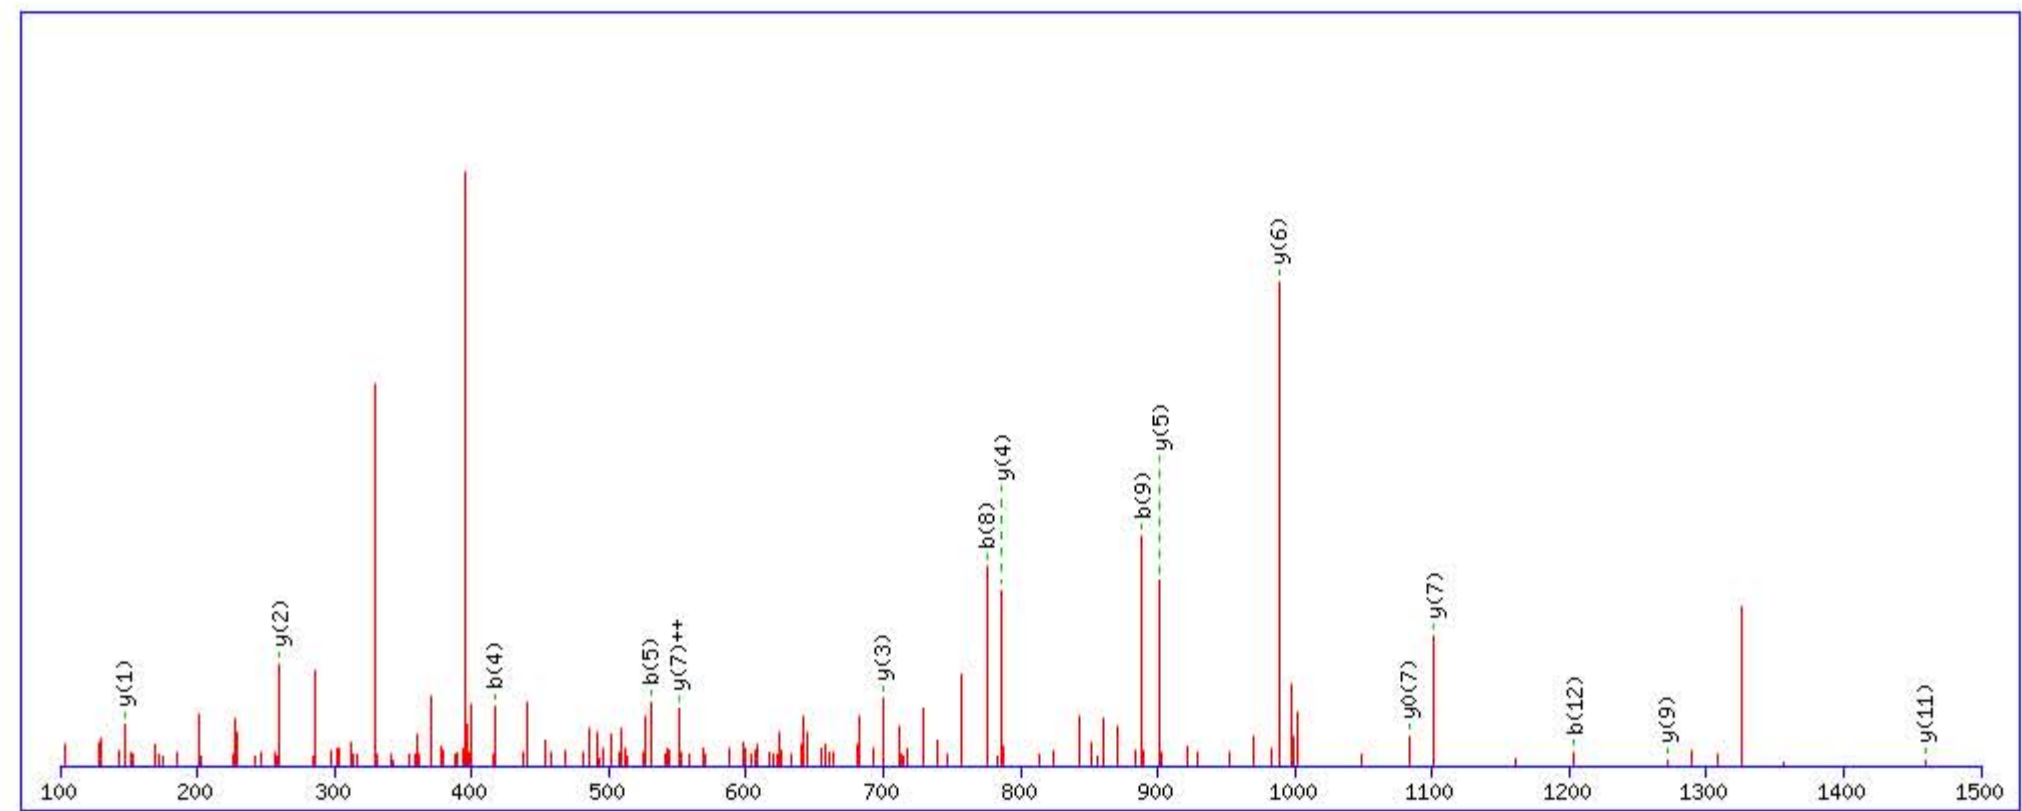

Monoisotopic mass of neutral peptide Mr(calc): 1988.014465

Fixed modifications: Carbamidomethyl (C) (apply to specified residues or termini only)

Variable modifications:

Q14 : Biotin:Thermo-21345 (Q)

Ions Score: 53 Expect: 1.8e-005

Matches : 16/138 fragment ions using 27 most intense peaks [\(help\)](#)

| #  | b                  | b <sup>++</sup> | b <sup>+</sup> | b <sup>+++</sup> | b <sup>0</sup> | b <sup>0++</sup> | Seq. | y                  | y <sup>++</sup>   | y <sup>+</sup> | y <sup>+++</sup> | y <sup>0</sup>     | y <sup>0++</sup> | #  |
|----|--------------------|-----------------|----------------|------------------|----------------|------------------|------|--------------------|-------------------|----------------|------------------|--------------------|------------------|----|
| 1  | 132.047761         | 66.527518       |                |                  |                |                  | M    |                    |                   |                |                  |                    |                  | 16 |
| 2  | 229.100525         | 115.053900      |                |                  |                |                  | P    | 1857.981269        | 929.494273        | 1840.954720    | 920.980998       | 1839.970704        | 920.488990       | 15 |
| 3  | 360.141010         | 180.574143      |                |                  |                |                  | M    | 1760.928505        | 880.967891        | 1743.901956    | 872.454616       | 1742.917940        | 871.962608       | 14 |
| 4  | <b>417.162474</b>  | 209.084875      |                |                  |                |                  | G    | 1629.888020        | 815.447648        | 1612.861471    | 806.934374       | 1611.877455        | 806.442366       | 13 |
| 5  | <b>530.246538</b>  | 265.626907      |                |                  |                |                  | L    | 1572.866556        | 786.936916        | 1555.840007    | 778.423642       | 1554.855991        | 777.931634       | 12 |
| 6  | 617.278566         | 309.142921      |                |                  | 599.268001     | 300.137638       | S    | <b>1459.782492</b> | 730.394884        | 1442.755943    | 721.881610       | 1441.771927        | 721.389602       | 11 |
| 7  | 718.326245         | 359.666761      |                |                  | 700.315680     | 350.661478       | T    | 1372.750464        | 686.878870        | 1355.723915    | 678.365596       | 1354.739899        | 677.873588       | 10 |
| 8  | <b>775.347709</b>  | 388.177493      |                |                  | 757.337144     | 379.172210       | G    | <b>1271.702785</b> | 636.355031        | 1254.676236    | 627.841756       | 1253.692220        | 627.349748       | 9  |
| 9  | <b>888.431773</b>  | 444.719525      |                |                  | 870.421208     | 435.714242       | I    | 1214.681321        | 607.844299        | 1197.654772    | 599.331024       | 1196.670756        | 598.839016       | 8  |
| 10 | 1001.515837        | 501.261557      |                |                  | 983.505272     | 492.256274       | I    | <b>1101.597257</b> | <b>551.302267</b> | 1084.570708    | 542.788992       | <b>1083.586692</b> | 542.296984       | 7  |
| 11 | 1088.547865        | 544.777571      |                |                  | 1070.537300    | 535.772288       | S    | <b>988.513193</b>  | 494.760235        | 971.486644     | 486.246960       | 970.502628         | 485.754952       | 6  |
| 12 | <b>1203.574808</b> | 602.291042      |                |                  | 1185.564243    | 593.285760       | D    | <b>901.481165</b>  | 451.244221        | 884.454616     | 442.730946       | 883.470600         | 442.238938       | 5  |
| 13 | 1290.606836        | 645.807056      |                |                  | 1272.596271    | 636.801774       | S    | <b>786.454222</b>  | 393.730749        | 769.427673     | 385.217475       | 768.443657         | 384.725467       | 4  |
| 14 | 1729.832162        | 865.419719      | 1712.805613    | 856.906445       | 1711.821597    | 856.414437       | Q    | <b>699.422194</b>  | 350.214735        | 682.395645     | 341.701461       |                    |                  | 3  |
| 15 | 1842.916226        | 921.961751      | 1825.889677    | 913.448477       | 1824.905661    | 912.956469       | I    | <b>260.196868</b>  | 130.602072        | 243.170319     | 122.088797       |                    |                  | 2  |
| 16 |                    |                 |                |                  |                |                  | K    | <b>147.112804</b>  | 74.060040         | 130.086255     | 65.546765        |                    |                  | 1  |

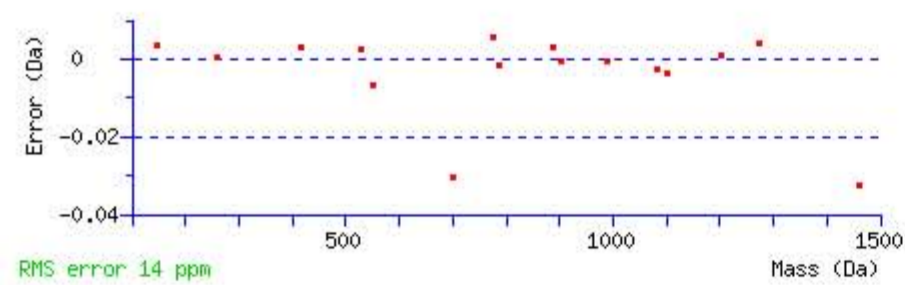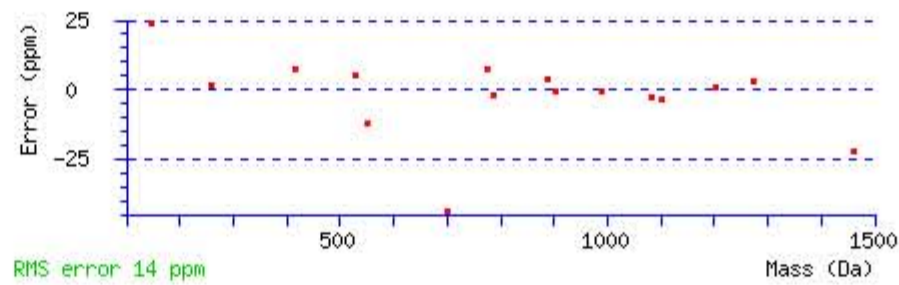

NCBI BLAST search of [MPMGLSTGIISDSQIK](#)

(Parameters: blastp, nr protein database, expect=20000, no filter, PAM30)

Other BLAST [web gateways](#)

### All matches to this query

| Score | Mr(calc):   | Delta    | Sequence                         |
|-------|-------------|----------|----------------------------------|
| 53.3  | 1988.014465 | 0.004247 | <a href="#">MPMGLSTGIISDSQIK</a> |
| 2.8   | 1988.000519 | 0.018193 | <a href="#">QQMLENQMEVRKK</a>    |
| 2.1   | 1988.011063 | 0.007649 | <a href="#">EPLAAVYQEMLAQAK</a>  |
| 0.2   | 1988.000519 | 0.018193 | <a href="#">QQMLENQMEVRKK</a>    |

**MATRIX SCIENCE Mascot Search Results**

**Peptide View**

MS/MS Fragmentation of **AADIEQQAVFAVFDENK**

Found in **FA5\_HUMAN**, Coagulation factor V OS=Homo sapiens GN=F5 PE=1 SV=4

Match to Query 43279: 2205.087162 from(736.036330,3+) rtinseconds(2760) index(50452)  
 Title: Locus:1.1.1.3672.12 File:"2013-07-02 CLN FXIII 180 min 3rd F 4.wiff"  
 Data file C:\Program Files (x86)\Matrix Science\Mascot Daemon\mgf9 FXIII 180 min 3rd\mascot\_daemon\_merge.mgf

Click mouse within plot area to zoom in by factor of two about that point  
 Or, Plot from  to  Da   
 Label all possible matches  Label matches used for scoring

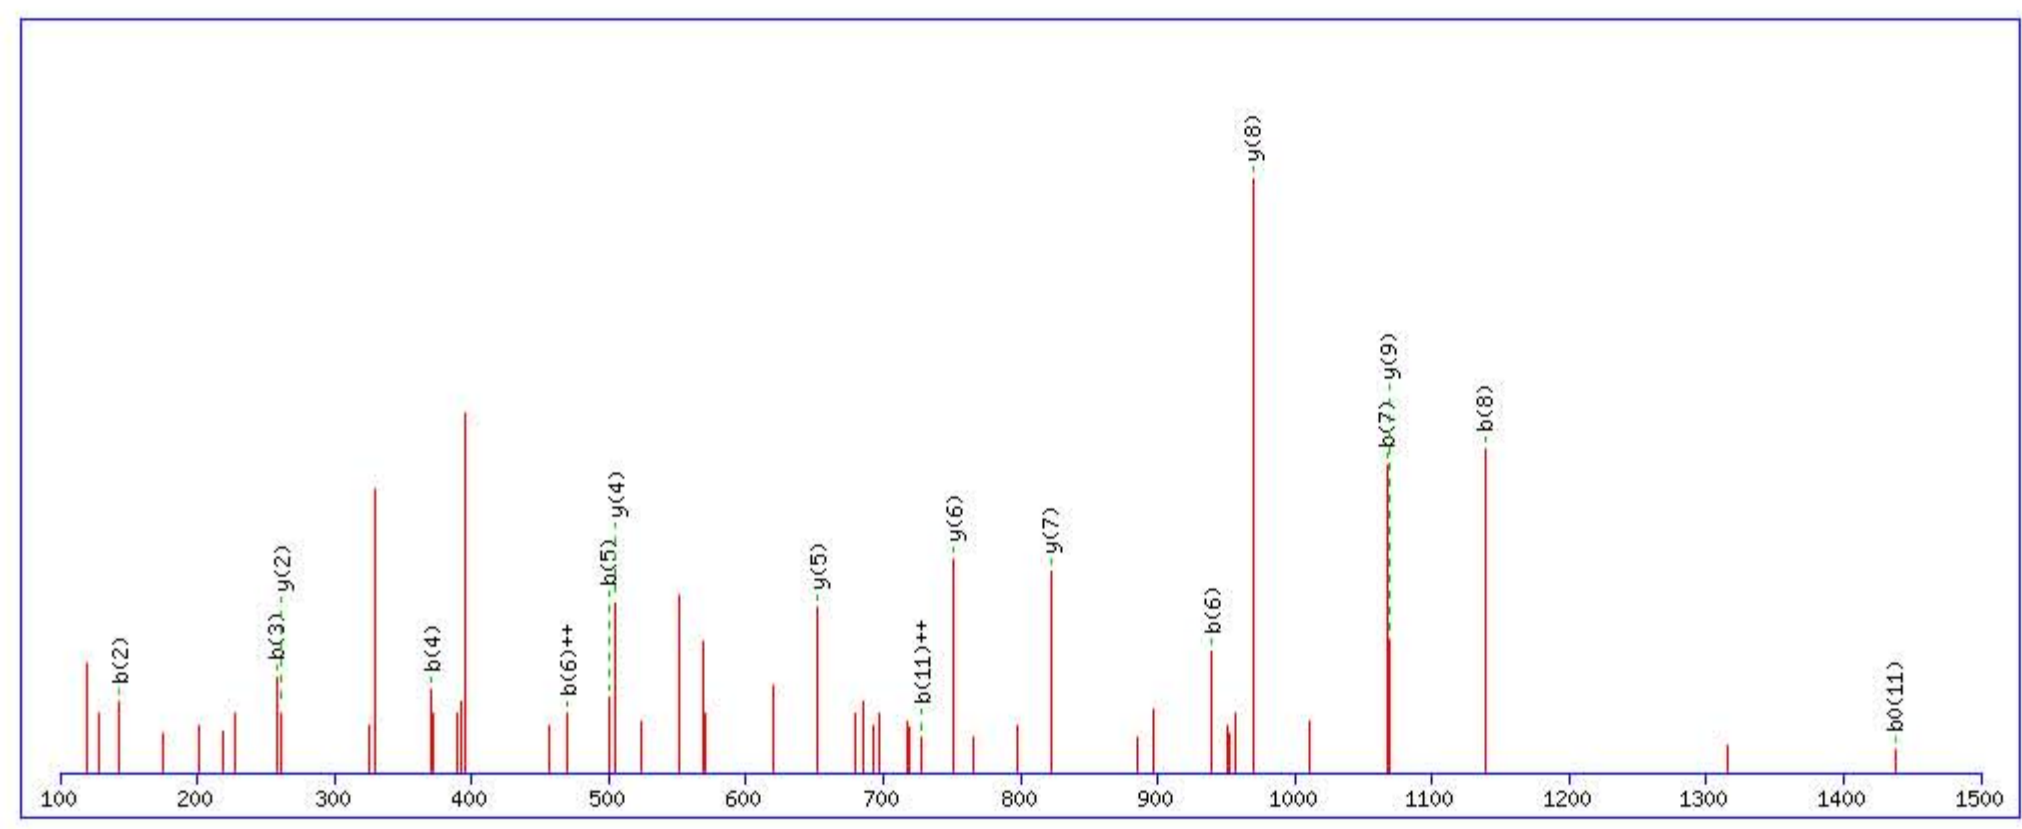

Monoisotopic mass of neutral peptide Mr(calc): 2205.077591  
 Fixed modifications: Carbamidomethyl (C) (apply to specified residues or termini only)  
 Variable modifications:  
 Q6 : Biotin:Thermo-21345 (Q)  
 Ions Score: 54 Expect: 2e-005  
 Matches : 17/174 fragment ions using 32 most intense peaks [\(help\)](#)

| #  | b                  | b <sup>++</sup>   | b <sup>+</sup> | b <sup>+++</sup> | b <sup>0</sup>     | b <sup>0++</sup> | Seq. | y                  | y <sup>++</sup> | y <sup>+</sup> | y <sup>+++</sup> | y <sup>0</sup> | y <sup>0++</sup> | #  |
|----|--------------------|-------------------|----------------|------------------|--------------------|------------------|------|--------------------|-----------------|----------------|------------------|----------------|------------------|----|
| 1  | 72.044390          | 36.525833         |                |                  |                    |                  | A    |                    |                 |                |                  |                |                  | 17 |
| 2  | <b>143.081504</b>  | 72.044390         |                |                  |                    |                  | A    | 2135.047769        | 1068.027522     | 2118.021220    | 1059.514248      | 2117.037204    | 1059.022240      | 16 |
| 3  | <b>258.108447</b>  | 129.557862        |                |                  | 240.097882         | 120.552579       | D    | 2064.010655        | 1032.508965     | 2046.984106    | 1023.995691      | 2046.000090    | 1023.503683      | 15 |
| 4  | <b>371.192511</b>  | 186.099894        |                |                  | 353.181946         | 177.094611       | I    | 1948.983712        | 974.995494      | 1931.957163    | 966.482220       | 1930.973147    | 965.990212       | 14 |
| 5  | <b>500.235104</b>  | 250.621190        |                |                  | 482.224539         | 241.615908       | E    | 1835.899648        | 918.453462      | 1818.873099    | 909.940188       | 1817.889083    | 909.448180       | 13 |
| 6  | <b>939.460430</b>  | <b>470.233853</b> | 922.433881     | 461.720579       | 921.449865         | 461.228571       | Q    | 1706.857055        | 853.932166      | 1689.830506    | 845.418891       | 1688.846490    | 844.926883       | 12 |
| 7  | <b>1067.519008</b> | 534.263142        | 1050.492459    | 525.749868       | 1049.508443        | 525.257860       | Q    | 1267.631729        | 634.319503      | 1250.605180    | 625.806228       | 1249.621164    | 625.314220       | 11 |
| 8  | <b>1138.556122</b> | 569.781699        | 1121.529573    | 561.268425       | 1120.545557        | 560.776416       | A    | 1139.573151        | 570.290214      | 1122.546602    | 561.776939       | 1121.562586    | 561.284931       | 10 |
| 9  | 1237.624536        | 619.315906        | 1220.597987    | 610.802632       | 1219.613971        | 610.310624       | V    | <b>1068.536037</b> | 534.771657      | 1051.509488    | 526.258382       | 1050.525472    | 525.766374       | 9  |
| 10 | 1384.692950        | 692.850113        | 1367.666401    | 684.336839       | 1366.682385        | 683.844831       | F    | <b>969.467623</b>  | 485.237450      | 952.441074     | 476.724175       | 951.457058     | 476.232167       | 8  |
| 11 | 1455.730064        | <b>728.368670</b> | 1438.703515    | 719.855396       | <b>1437.719499</b> | 719.363388       | A    | <b>822.399209</b>  | 411.703243      | 805.372660     | 403.189968       | 804.388644     | 402.697960       | 7  |
| 12 | 1554.798478        | 777.902877        | 1537.771929    | 769.389603       | 1536.787913        | 768.897595       | V    | <b>751.362095</b>  | 376.184686      | 734.335546     | 367.671411       | 733.351530     | 367.179403       | 6  |
| 13 | 1701.866892        | 851.437084        | 1684.840343    | 842.923810       | 1683.856327        | 842.431802       | F    | <b>652.293681</b>  | 326.650479      | 635.267132     | 318.137204       | 634.283116     | 317.645196       | 5  |
| 14 | 1816.893835        | 908.950556        | 1799.867286    | 900.437281       | 1798.883270        | 899.945273       | D    | <b>505.225267</b>  | 253.116271      | 488.198718     | 244.602997       | 487.214702     | 244.110989       | 4  |
| 15 | 1945.936428        | 973.471852        | 1928.909879    | 964.958578       | 1927.925863        | 964.466570       | E    | 390.198324         | 195.602800      | 373.171775     | 187.089525       | 372.187759     | 186.597517       | 3  |
| 16 | 2059.979355        | 1030.493315       | 2042.952806    | 1021.980041      | 2041.968790        | 1021.488033      | N    | <b>261.155731</b>  | 131.081503      | 244.129182     | 122.568229       |                |                  | 2  |
| 17 |                    |                   |                |                  |                    |                  | K    | 147.112804         | 74.060040       | 130.086255     | 65.546765        |                |                  | 1  |

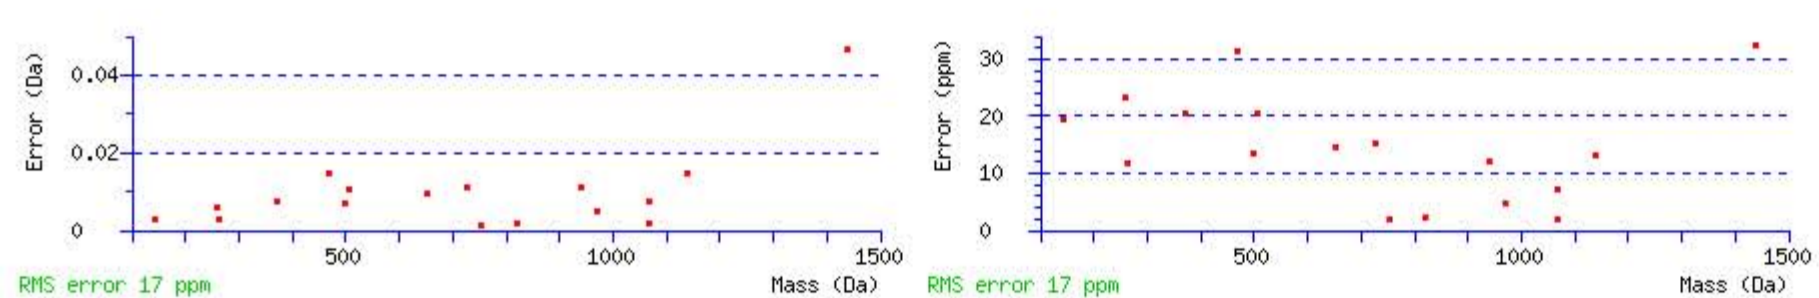

NCBI BLAST search of **AADIEQQAVFAVFDENK**  
 (Parameters: blastp, nr protein database, expect=20000, no filter, PAM30)  
 Other BLAST [web gateways](#)

**All matches to this query**

| Score | Mr(calc):   | Delta    | Sequence                              |
|-------|-------------|----------|---------------------------------------|
| 54.2  | 2205.077591 | 0.009571 | <a href="#">AADIEQQAVFAVFDENK</a>     |
| 42.1  | 2205.077591 | 0.009571 | <a href="#">AADIEQQAVFAVFDENK</a>     |
| 3.8   | 2205.063492 | 0.023670 | <a href="#">GERGEPGIRGEDGRPGQEGPR</a> |
| 0.2   | 2205.080063 | 0.007099 | <a href="#">EKENDELDIQLKVFENK</a>     |

**Mascot Search Results**

**Peptide View**

MS/MS Fragmentation of **HLSQDTGSPSGMRPWEDLPSQDTGSPSR**  
 Found in **FAS\_HUMAN**, Coagulation factor V OS=Homo sapiens GN=F5 PE=1 SV=4

Match to Query 58324: 3335.547696 from(834.894200,4+) rtinseconds(1984) index(45935)  
 Title: Locus:1.1.1.3403.21 File:"2013-07-02 CLN FXIII 180 min 3rd F 4.wiff"  
 Data file C:\Program Files (x86)\Matrix Science\Mascot Daemon\mgf9 FXIII 180 min 3rd\mascot\_daemon\_merge.mgf

Click mouse within plot area to zoom in by factor of two about that point  
 Or, Plot from  to  Da   
 Label all possible matches  Label matches used for scoring

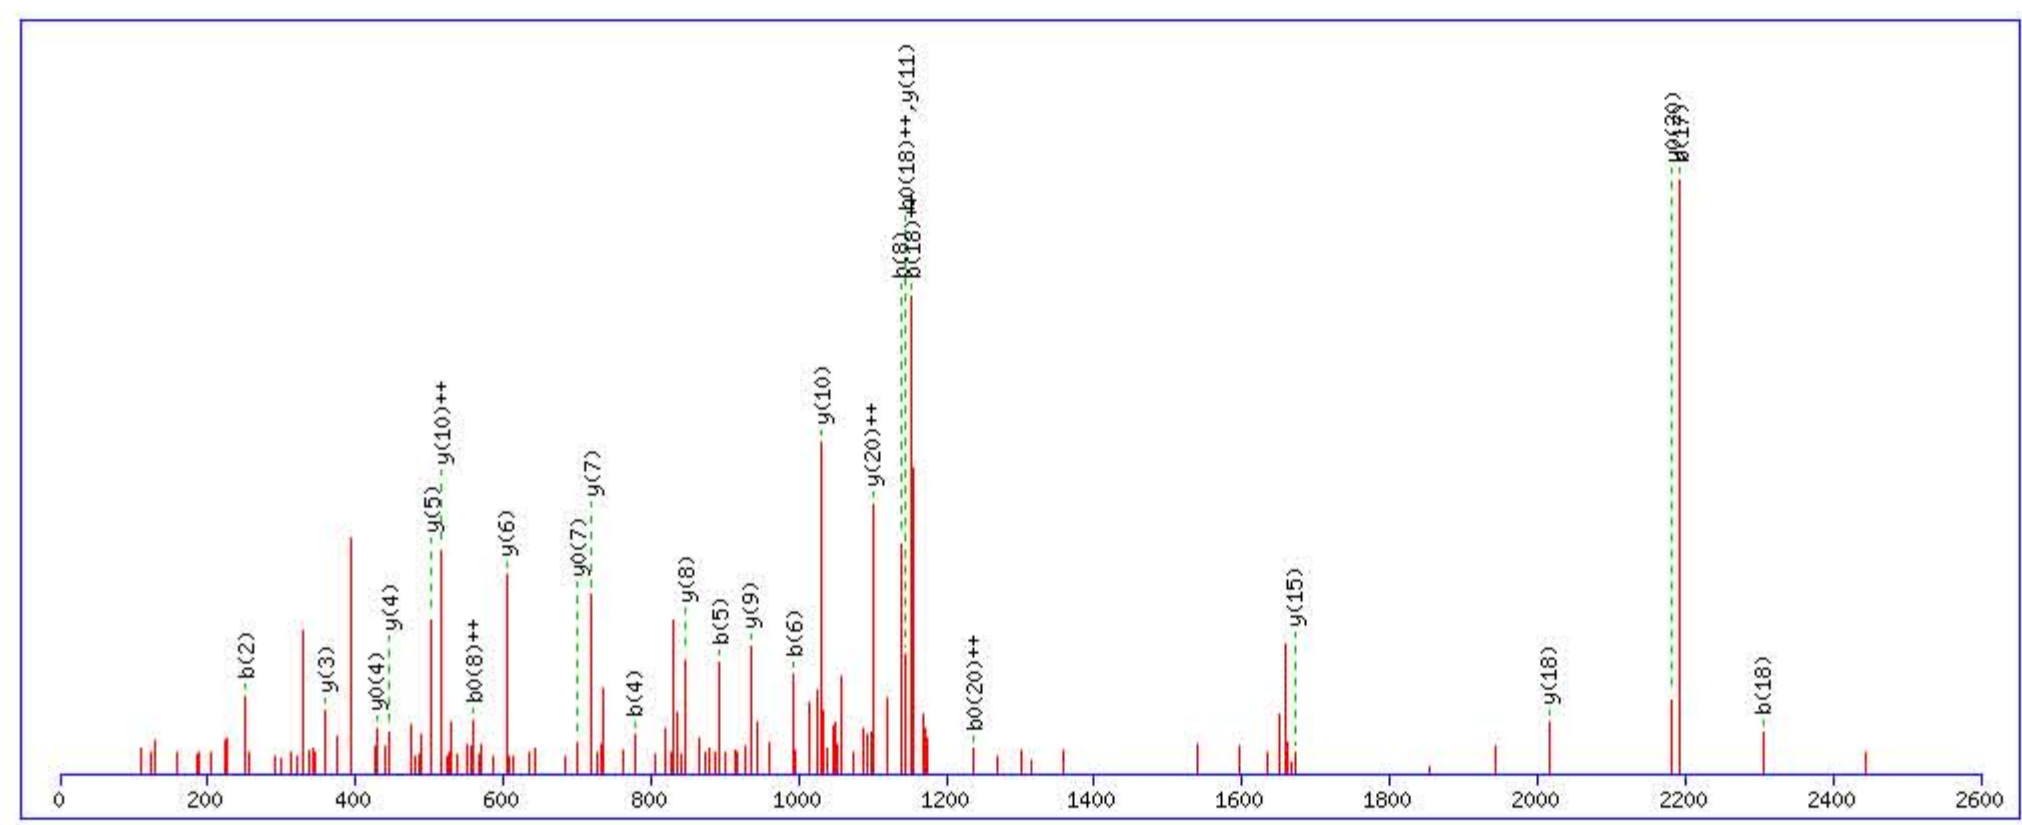

Monoisotopic mass of neutral peptide Mr(calc): 3335.529938  
 Fixed modifications: Carbamidomethyl (C) (apply to specified residues or termini only)  
 Variable modifications:  
 Q4 : Biotin:Thermo-21345 (Q)  
 Ions Score: 47 Expect: 0.00032  
 Matches : 27/312 fragment ions using 63 most intense peaks [\(help\)](#)

| #  | b                  | b <sup>++</sup>    | b <sup>*</sup> | b <sup>+++</sup> | b <sup>0</sup> | b <sup>0++</sup>   | Seq. | y                  | y <sup>++</sup>    | y <sup>*</sup> | y <sup>+++</sup> | y <sup>0</sup>     | y <sup>0++</sup> | #  |
|----|--------------------|--------------------|----------------|------------------|----------------|--------------------|------|--------------------|--------------------|----------------|------------------|--------------------|------------------|----|
| 1  | 138.066188         | 69.536732          |                |                  |                |                    | H    |                    |                    |                |                  |                    |                  | 28 |
| 2  | <b>251.150252</b>  | 126.078764         |                |                  |                |                    | L    | 3199.478289        | 1600.242782        | 3182.451740    | 1591.729508      | 3181.467724        | 1591.237500      | 27 |
| 3  | 338.182280         | 169.594778         |                |                  | 320.171715     | 160.589495         | S    | 3086.394225        | 1543.700750        | 3069.367676    | 1535.187476      | 3068.383660        | 1534.695468      | 26 |
| 4  | <b>777.407606</b>  | 389.207441         | 760.381057     | 380.694166       | 759.397041     | 380.202159         | Q    | 2999.362197        | 1500.184736        | 2982.335648    | 1491.671462      | 2981.351632        | 1491.179454      | 25 |
| 5  | <b>892.434549</b>  | 446.720913         | 875.408000     | 438.207638       | 874.423984     | 437.715630         | D    | 2560.136871        | 1280.572073        | 2543.110322    | 1272.058799      | 2542.126306        | 1271.566791      | 24 |
| 6  | <b>993.482228</b>  | 497.244752         | 976.455679     | 488.731477       | 975.471663     | 488.239469         | T    | 2445.109928        | 1223.058602        | 2428.083379    | 1214.545327      | 2427.099363        | 1214.053319      | 23 |
| 7  | 1050.503692        | 525.755484         | 1033.477143    | 517.242210       | 1032.493127    | 516.750202         | G    | 2344.062249        | 1172.534762        | 2327.035700    | 1164.021488      | 2326.051684        | 1163.529480      | 22 |
| 8  | <b>1137.535720</b> | 569.271498         | 1120.509171    | 560.758224       | 1119.525155    | <b>560.266216</b>  | S    | 2287.040785        | 1144.024030        | 2270.014236    | 1135.510756      | 2269.030220        | 1135.018748      | 21 |
| 9  | 1234.588484        | 617.797880         | 1217.561935    | 609.284606       | 1216.577919    | 608.792598         | P    | 2200.008757        | <b>1100.508016</b> | 2182.982208    | 1091.994742      | <b>2181.998192</b> | 1091.502734      | 20 |
| 10 | 1321.620512        | 661.313894         | 1304.593963    | 652.800620       | 1303.609947    | 652.308612         | S    | 2102.955993        | 1051.981634        | 2085.929444    | 1043.468360      | 2084.945428        | 1042.976352      | 19 |
| 11 | 1378.641976        | 689.824626         | 1361.615427    | 681.311352       | 1360.631411    | 680.819344         | G    | <b>2015.923965</b> | 1008.465620        | 1998.897416    | 999.952346       | 1997.913400        | 999.460338       | 18 |
| 12 | 1509.682461        | 755.344869         | 1492.655912    | 746.831594       | 1491.671896    | 746.339586         | M    | 1958.902501        | 979.954888         | 1941.875952    | 971.441614       | 1940.891936        | 970.949606       | 17 |
| 13 | 1665.783572        | 833.395424         | 1648.757023    | 824.882150       | 1647.773007    | 824.390142         | R    | 1827.862016        | 914.434646         | 1810.835467    | 905.921371       | 1809.851451        | 905.429363       | 16 |
| 14 | 1762.836336        | 881.921806         | 1745.809787    | 873.408532       | 1744.825771    | 872.916524         | P    | <b>1671.760905</b> | 836.384090         | 1654.734356    | 827.870816       | 1653.750340        | 827.378808       | 15 |
| 15 | 1948.915649        | 974.961463         | 1931.889100    | 966.448188       | 1930.905084    | 965.956180         | W    | 1574.708141        | 787.857708         | 1557.681592    | 779.344434       | 1556.697576        | 778.852426       | 14 |
| 16 | 2077.958242        | 1039.482759        | 2060.931693    | 1030.969484      | 2059.947677    | 1030.477476        | E    | 1388.628828        | 694.818052         | 1371.602279    | 686.304778       | 1370.618263        | 685.812769       | 13 |
| 17 | <b>2192.985185</b> | 1096.996230        | 2175.958636    | 1088.482956      | 2174.974620    | 1087.990948        | D    | 1259.586235        | 630.296756         | 1242.559686    | 621.783481       | 1241.575670        | 621.291473       | 12 |
| 18 | <b>2306.069249</b> | <b>1153.538262</b> | 2289.042700    | 1145.024988      | 2288.058684    | <b>1144.532980</b> | L    | <b>1144.559292</b> | 572.783284         | 1127.532743    | 564.270010       | 1126.548727        | 563.778002       | 11 |
| 19 | 2403.122013        | 1202.064644        | 2386.095464    | 1193.551370      | 2385.111448    | 1193.059362        | P    | <b>1031.475228</b> | <b>516.241252</b>  | 1014.448679    | 507.727978       | 1013.464663        | 507.235970       | 10 |
| 20 | 2490.154041        | 1245.580658        | 2473.127492    | 1237.067384      | 2472.143476    | <b>1236.575376</b> | S    | <b>934.422464</b>  | 467.714870         | 917.395915     | 459.201596       | 916.411899         | 458.709588       | 9  |
| 21 | 2618.212619        | 1309.609947        | 2601.186070    | 1301.096673      | 2600.202054    | 1300.604665        | Q    | <b>847.390436</b>  | 424.198856         | 830.363887     | 415.685581       | 829.379871         | 415.193573       | 8  |
| 22 | 2733.239562        | 1367.123419        | 2716.213013    | 1358.610144      | 2715.228997    | 1358.118136        | D    | <b>719.331858</b>  | 360.169567         | 702.305309     | 351.656292       | <b>701.321293</b>  | 351.164284       | 7  |
| 23 | 2834.287241        | 1417.647258        | 2817.260692    | 1409.133984      | 2816.276676    | 1408.641976        | T    | <b>604.304915</b>  | 302.656095         | 587.278366     | 294.142821       | 586.294350         | 293.650813       | 6  |
| 24 | 2891.308705        | 1446.157990        | 2874.282156    | 1437.644716      | 2873.298140    | 1437.152708        | G    | <b>503.257236</b>  | 252.132256         | 486.230687     | 243.618982       | 485.246671         | 243.126974       | 5  |
| 25 | 2978.340733        | 1489.674004        | 2961.314184    | 1481.160730      | 2960.330168    | 1480.668722        | S    | <b>446.235772</b>  | 223.621524         | 429.209223     | 215.108250       | <b>428.225207</b>  | 214.616242       | 4  |
| 26 | 3075.393497        | 1538.200386        | 3058.366948    | 1529.687112      | 3057.382932    | 1529.195104        | P    | <b>359.203744</b>  | 180.105510         | 342.177195     | 171.592236       | 341.193179         | 171.100228       | 3  |
| 27 | 3162.425525        | 1581.716400        | 3145.398976    | 1573.203126      | 3144.414960    | 1572.711118        | S    | 262.150980         | 131.579128         | 245.124431     | 123.065854       | 244.140415         | 122.573846       | 2  |
| 28 |                    |                    |                |                  |                |                    | R    | 175.118952         | 88.063114          | 158.092403     | 79.549839        |                    |                  | 1  |

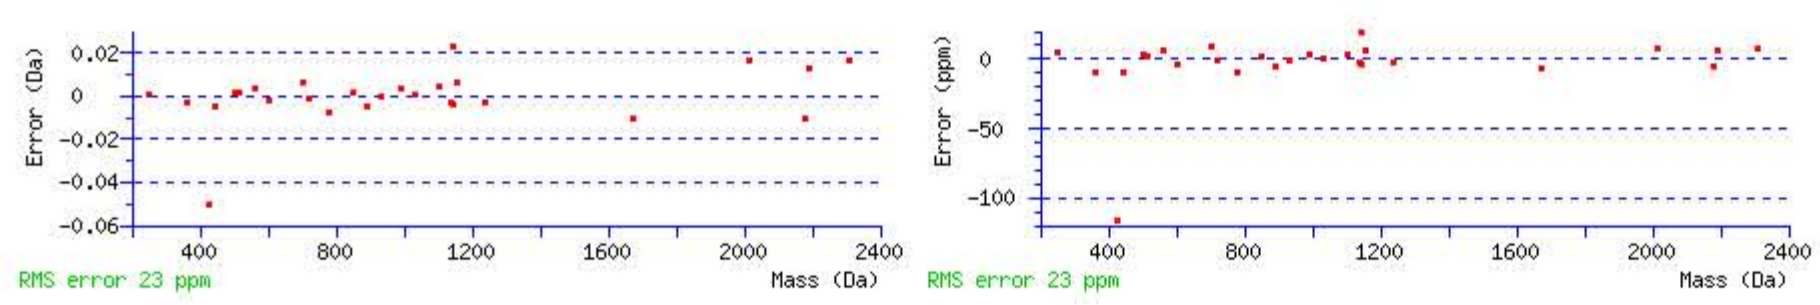

NCBI BLAST search of **HLSQDTGSPSGMRPWEDLPSQDTGSPSR**  
 (Parameters: blastp, nr protein database, expect=20000, no filter, PAM30)  
 Other BLAST [web gateways](#)

**All matches to this query**

| Score | Mr(calc):   | Delta    | Sequence                                     |
|-------|-------------|----------|----------------------------------------------|
| 46.8  | 3335.529938 | 0.017758 | <a href="#">HLSQDTGSPSGMRPWEDLPSQDTGSPSR</a> |

# MASCOT SCIENCE Mascot Search Results

## Peptide View

MS/MS Fragmentation of **IVGGQECK**

Found in **FA10\_HUMAN**, Coagulation factor X OS=Homo sapiens GN=F10 PE=1 SV=2

Match to Query 17754: 1200.596628 from(601.305590,2+) rtinseconds(1446) index(42544)

Title: Locus:1.1.1.3216.17 File:"2013-07-02 CLN FXIII 180 min 3rd F 4.wiff"

Data file C:\Program Files (x86)\Matrix Science\Mascot Daemon\mgf\9 FXIII 180 min 3rd\mascot\_daemon\_merge.mgf

Click mouse within plot area to zoom in by factor of two about that point

Or, Plot from  to  Da

Label all possible matches  Label matches used for scoring

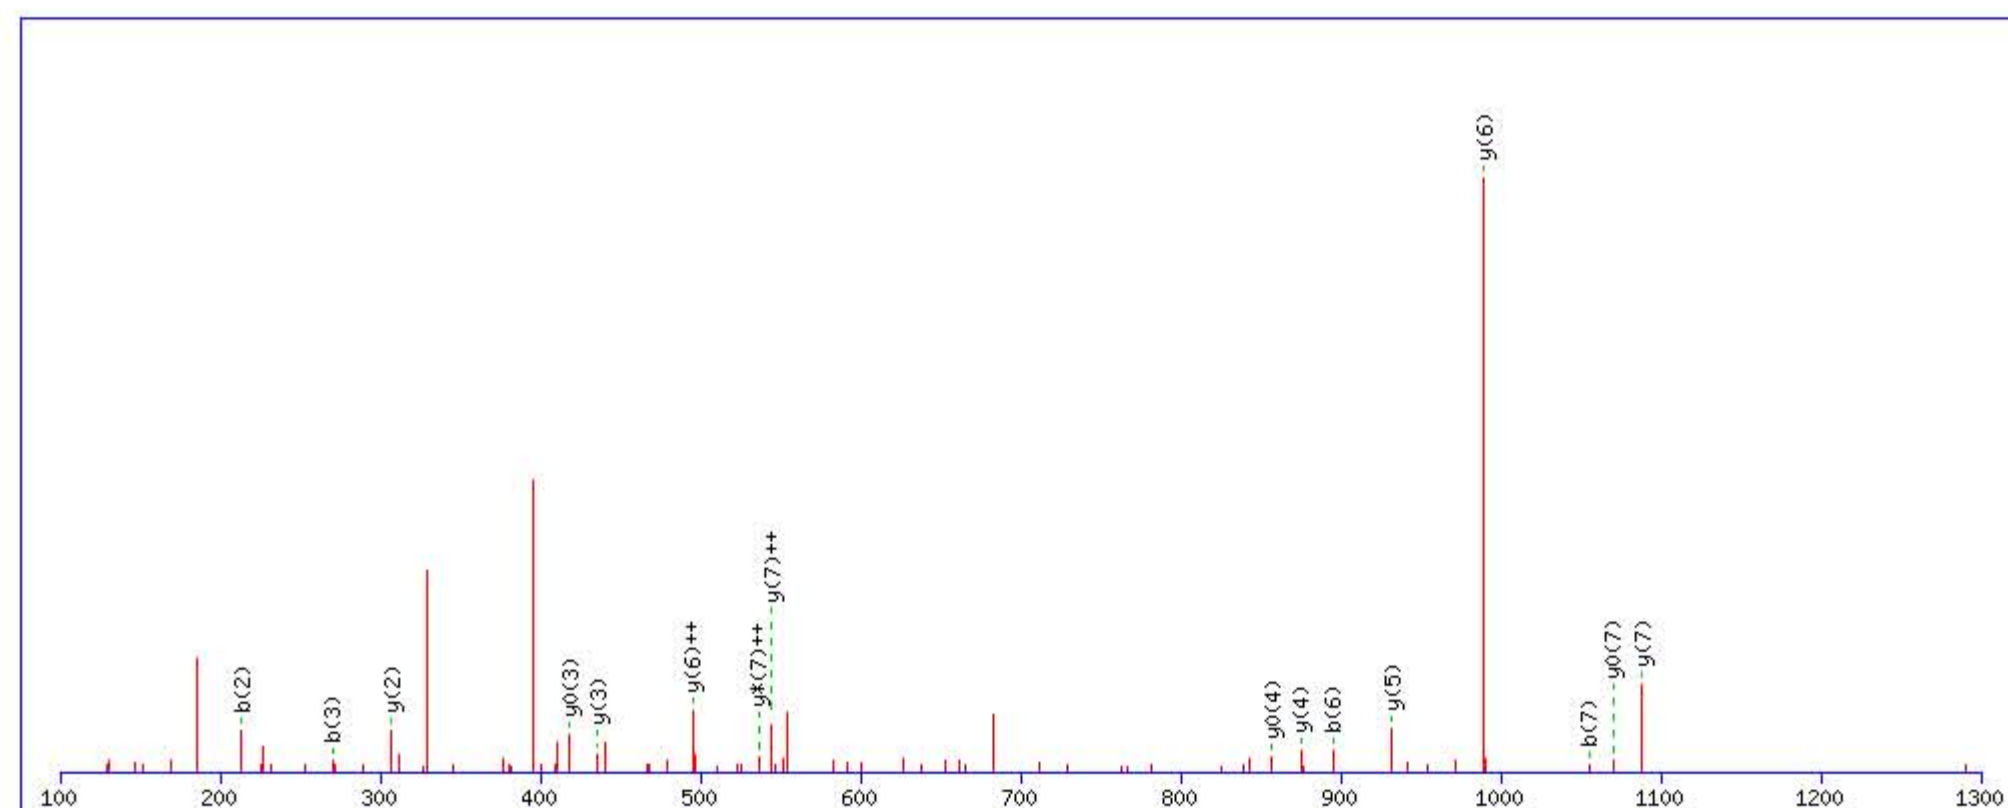

Monoisotopic mass of neutral peptide Mr(calc): 1200.599503

Fixed modifications: Carbamidomethyl (C) (apply to specified residues or termini only)

Variable modifications:

Q5 : Biotin:Thermo-21345 (Q)

Ions Score: 33 Expect: 0.0022

Matches : 16/62 fragment ions using 30 most intense peaks [\(help\)](#)

| # | b                  | b <sup>++</sup> | b <sup>*</sup> | b <sup>*++</sup> | b <sup>0</sup> | b <sup>0++</sup> | Seq. | y                  | y <sup>++</sup>   | y <sup>*</sup> | y <sup>*++</sup>  | y <sup>0</sup>     | y <sup>0++</sup> | # |
|---|--------------------|-----------------|----------------|------------------|----------------|------------------|------|--------------------|-------------------|----------------|-------------------|--------------------|------------------|---|
| 1 | 114.091340         | 57.549308       |                |                  |                |                  | I    |                    |                   |                |                   |                    |                  | 8 |
| 2 | <b>213.159754</b>  | 107.083515      |                |                  |                |                  | V    | <b>1088.522714</b> | <b>544.764995</b> | 1071.496165    | <b>536.251721</b> | <b>1070.512149</b> | 535.759713       | 7 |
| 3 | <b>270.181218</b>  | 135.594247      |                |                  |                |                  | G    | <b>989.454300</b>  | <b>495.230788</b> | 972.427751     | 486.717514        | 971.443735         | 486.225506       | 6 |
| 4 | 327.202682         | 164.104979      |                |                  |                |                  | G    | <b>932.432836</b>  | 466.720056        | 915.406287     | 458.206782        | 914.422271         | 457.714774       | 5 |
| 5 | 766.428008         | 383.717642      | 749.401459     | 375.204368       |                |                  | Q    | <b>875.411372</b>  | 438.209324        | 858.384823     | 429.696050        | <b>857.400807</b>  | 429.204042       | 4 |
| 6 | <b>895.470601</b>  | 448.238939      | 878.444052     | 439.725664       | 877.460036     | 439.233656       | E    | <b>436.186046</b>  | 218.596661        | 419.159497     | 210.083386        | <b>418.175481</b>  | 209.591378       | 3 |
| 7 | <b>1055.501250</b> | 528.254263      | 1038.474701    | 519.740989       | 1037.490685    | 519.248981       | C    | <b>307.143453</b>  | 154.075364        | 290.116904     | 145.562090        |                    |                  | 2 |
| 8 |                    |                 |                |                  |                |                  | K    | 147.112804         | 74.060040         | 130.086255     | 65.546765         |                    |                  | 1 |

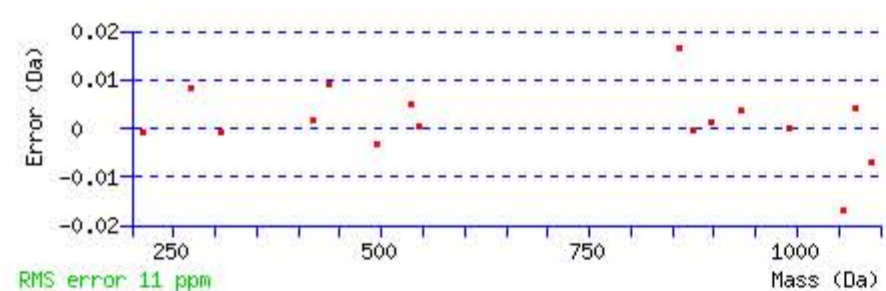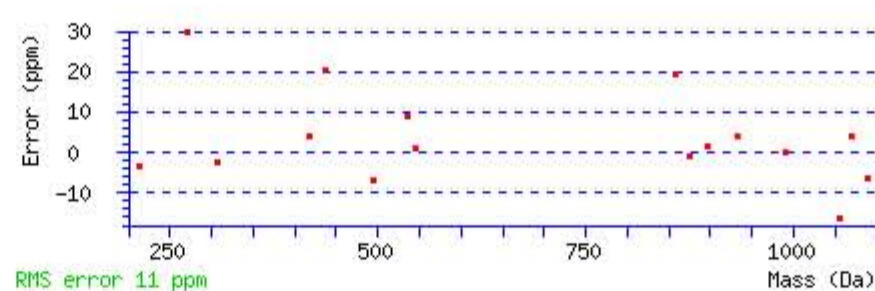

NCBI BLAST search of **IVGGQECK**

(Parameters: blastp, nr protein database, expect=20000, no filter, PAM30)

Other BLAST [web gateways](#)

## All matches to this query

| Score | Mr(calc):   | Delta     | Sequence                   |
|-------|-------------|-----------|----------------------------|
| 32.9  | 1200.599503 | -0.002875 | <a href="#">IVGGQECK</a>   |
| 4.2   | 1200.599503 | -0.002875 | <a href="#">LIQGDGCK</a>   |
| 1.1   | 1200.596100 | 0.000528  | <a href="#">LVKMYDNR</a>   |
| 0.9   | 1200.607376 | -0.010748 | <a href="#">HTGVKPFQCK</a> |

















# MASCOT SCIENCE Mascot Search Results

## Peptide View

MS/MS Fragmentation of **LASQACR**

Found in **FA12\_HUMAN**, Coagulation factor XII OS=Homo sapiens GN=F12 PE=1 SV=3

Match to Query 14650: 1115.553848 from(558.784200,2+) rtinseconds(1403) index(15231)

Title: Locus:1.1.1.3054.14 File:"2013-07-02 CLN FXIII 180 min 3rd F 2.wiff"

Data file C:\Program Files (x86)\Matrix Science\Mascot Daemon\mgf9 FXIII 180 min 3rd\mascot\_daemon\_merge.mgf

Click mouse within plot area to zoom in by factor of two about that point

Or, Plot from  to  Da

Label all possible matches  Label matches used for scoring

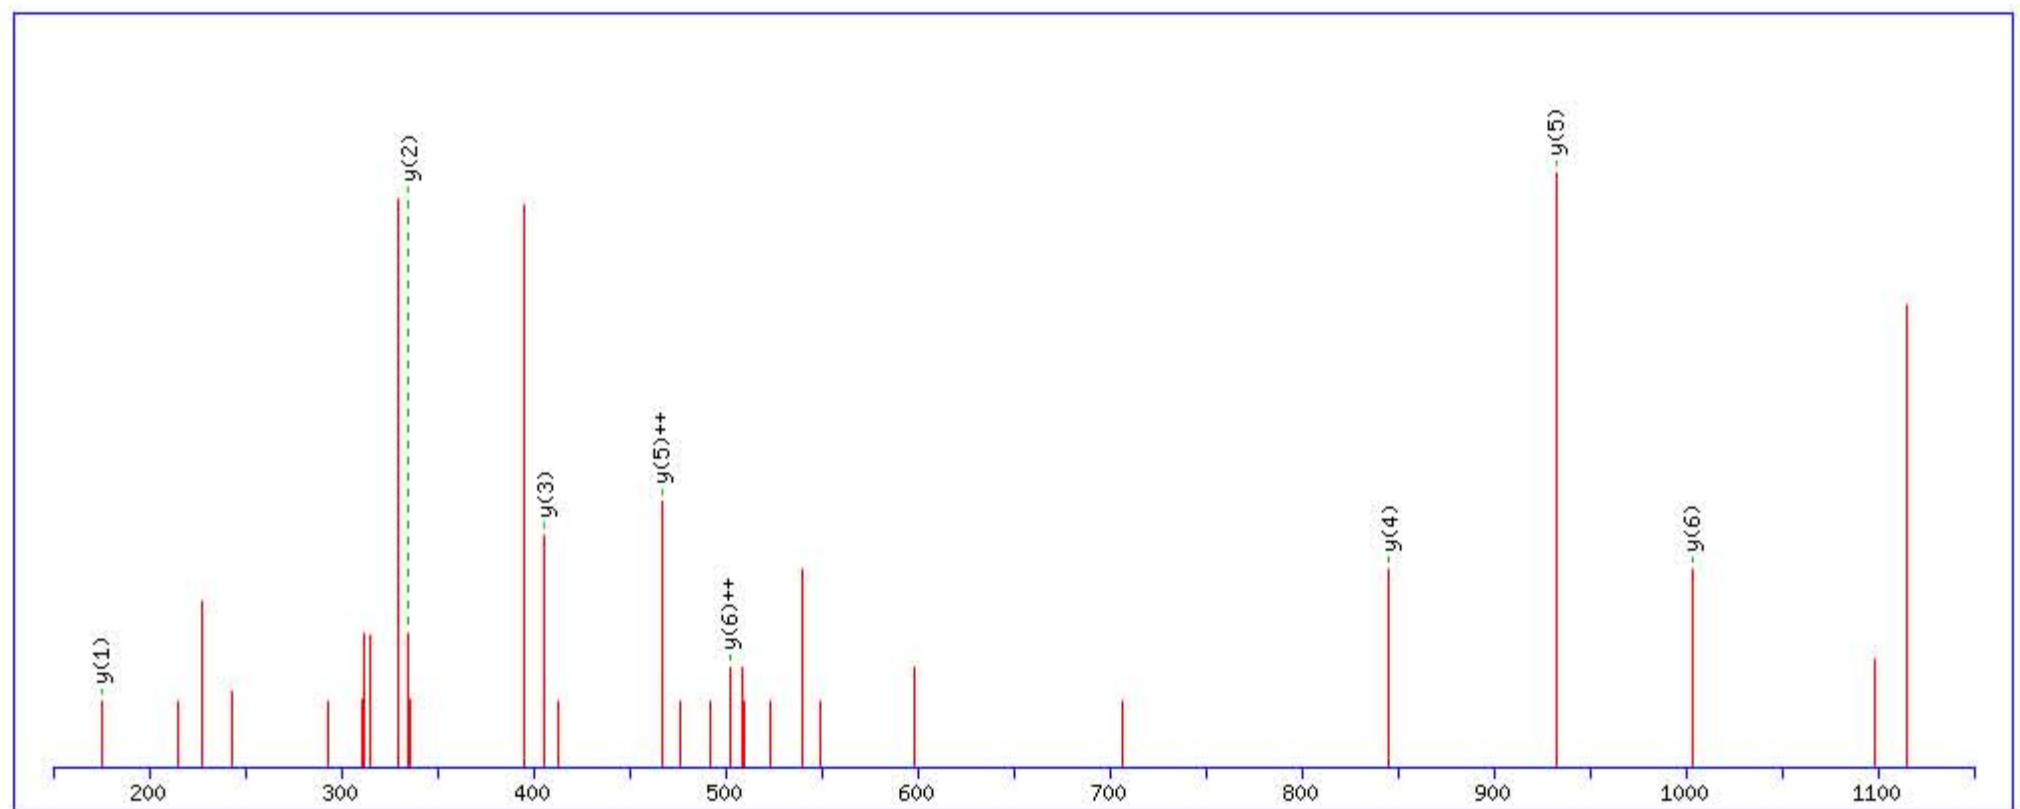

Monoisotopic mass of neutral peptide Mr(calc): 1115.557953

Fixed modifications: Carbamidomethyl (C) (apply to specified residues or termini only)

Variable modifications:

Q4 : Biotin:Thermo-21345 (Q)

Ions Score: 35 Expect: 0.002

Matches : 8/54 fragment ions using 18 most intense peaks ([help](#))

| # | b          | b <sup>++</sup> | b <sup>+</sup> | b <sup>*++</sup> | b <sup>0</sup> | b <sup>0++</sup> | Seq. | y           | y <sup>++</sup> | y <sup>+</sup> | y <sup>*++</sup> | y <sup>0</sup> | y <sup>0++</sup> | # |
|---|------------|-----------------|----------------|------------------|----------------|------------------|------|-------------|-----------------|----------------|------------------|----------------|------------------|---|
| 1 | 114.091340 | 57.549308       |                |                  |                |                  | L    |             |                 |                |                  |                |                  | 7 |
| 2 | 185.128454 | 93.067865       |                |                  |                |                  | A    | 1003.481183 | 502.244230      | 986.454634     | 493.730955       | 985.470618     | 493.238947       | 6 |
| 3 | 272.160482 | 136.583879      |                |                  | 254.149917     | 127.578596       | S    | 932.444069  | 466.725673      | 915.417520     | 458.212398       | 914.433504     | 457.720390       | 5 |
| 4 | 711.385808 | 356.196542      | 694.359259     | 347.683268       | 693.375243     | 347.191260       | Q    | 845.412041  | 423.209659      | 828.385492     | 414.696384       |                |                  | 4 |
| 5 | 782.422922 | 391.715099      | 765.396373     | 383.201824       | 764.412357     | 382.709816       | A    | 406.186715  | 203.596995      | 389.160166     | 195.083721       |                |                  | 3 |
| 6 | 942.453571 | 471.730424      | 925.427022     | 463.217149       | 924.443006     | 462.725141       | C    | 335.149601  | 168.078438      | 318.123052     | 159.565164       |                |                  | 2 |
| 7 |            |                 |                |                  |                |                  | R    | 175.118952  | 88.063114       | 158.092403     | 79.549839        |                |                  | 1 |

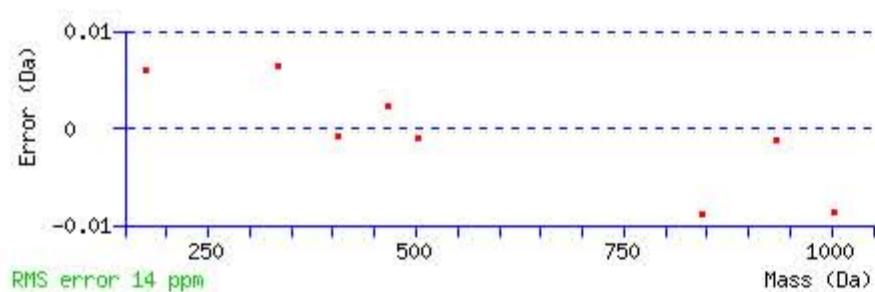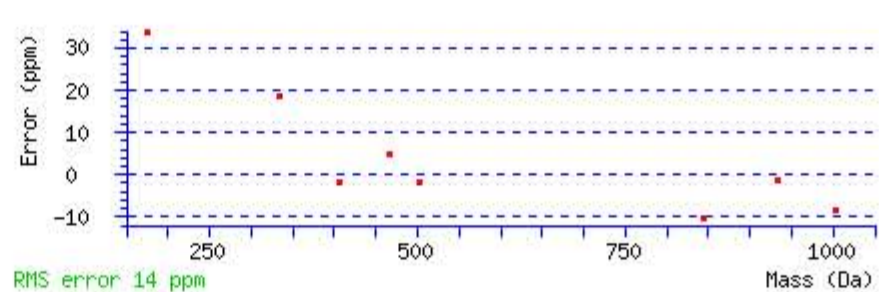

NCBI BLAST search of **LASQACR**

(Parameters: blastp, nr protein database, expect=20000, no filter, PAM30)

Other BLAST [web gateways](#)

All matches to this query

| Score | Mr(calc):   | Delta     | Sequence                    |
|-------|-------------|-----------|-----------------------------|
| 35.4  | 1115.557953 | -0.004105 | <a href="#">LASQACR</a>     |
| 6.2   | 1115.550552 | 0.003296  | <a href="#">LAAGSRCPER</a>  |
| 3.9   | 1115.557098 | -0.003250 | <a href="#">LEQGGTADGLR</a> |
| 1.6   | 1115.564484 | -0.010636 | <a href="#">LVDPQEMLR</a>   |
| 1.6   | 1115.543350 | 0.010498  | <a href="#">LEYKFCTR</a>    |
| 1.4   | 1115.546722 | 0.007126  | <a href="#">LAQDACK</a>     |

Mascot: <http://www.matrixscience.com/>



# MASCOT SEARCH RESULTS

## Peptide View

MS/MS Fragmentation of **TEQAAVAR**

Found in **FA12\_HUMAN**, Coagulation factor XII OS=Homo sapiens GN=F12 PE=1 SV=3

Match to Query 16393: 1155.603248 from(578.808900,2+) rtinseconds(1429) index(15438)

Title: Locus:1.1.1.3063.20 File:"2013-07-02 CLN FXIII 180 min 3rd F 2.wiff"

Data file C:\Program Files (x86)\Matrix Science\Mascot Daemon\mgf9 FXIII 180 min 3rd\mascot\_daemon\_merge.mgf

Click mouse within plot area to zoom in by factor of two about that point

Or, Plot from 100 to 1100 Da Full range

Label all possible matches  Label matches used for scoring

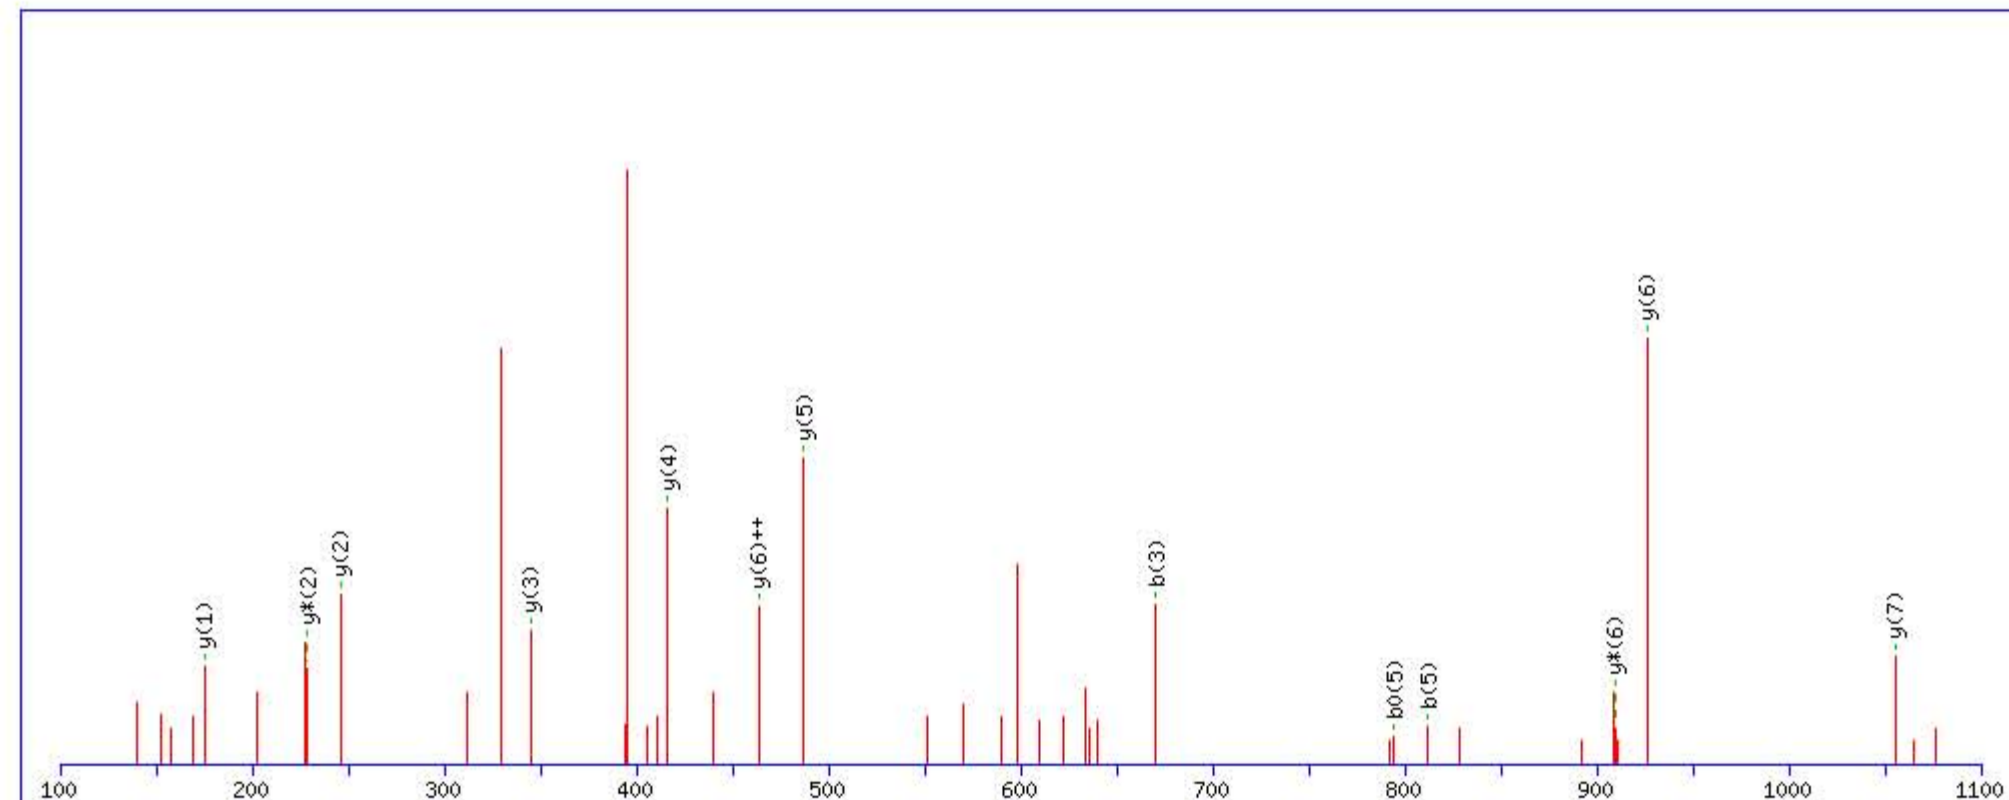

Monoisotopic mass of neutral peptide Mr(calc): 1155.607010

Fixed modifications: Carbamidomethyl (C) (apply to specified residues or termini only)

Variable modifications:

Q3 : Biotin:Thermo-21345 (Q)

Ions Score: 42 Expect: 0.0007

Matches : 13/68 fragment ions using 26 most intense peaks [\(help\)](#)

| # | b          | b <sup>++</sup> | b <sup>*</sup> | b <sup>*++</sup> | b <sup>0</sup> | b <sup>0++</sup> | Seq. | y           | y <sup>++</sup> | y <sup>*</sup> | y <sup>*++</sup> | y <sup>0</sup> | y <sup>0++</sup> | # |
|---|------------|-----------------|----------------|------------------|----------------|------------------|------|-------------|-----------------|----------------|------------------|----------------|------------------|---|
| 1 | 102.054955 | 51.531116       |                |                  | 84.044390      | 42.525833        | T    |             |                 |                |                  |                |                  | 8 |
| 2 | 231.097548 | 116.052412      |                |                  | 213.086983     | 107.047130       | E    | 1055.566627 | 528.286951      | 1038.540078    | 519.773677       | 1037.556062    | 519.281669       | 7 |
| 3 | 670.322874 | 335.665075      | 653.296325     | 327.151801       | 652.312309     | 326.659793       | Q    | 926.524034  | 463.765655      | 909.497485     | 455.252380       |                |                  | 6 |
| 4 | 741.359988 | 371.183632      | 724.333439     | 362.670358       | 723.349423     | 362.178350       | A    | 487.298708  | 244.152992      | 470.272159     | 235.639717       |                |                  | 5 |
| 5 | 812.397102 | 406.702189      | 795.370553     | 398.188915       | 794.386537     | 397.696907       | A    | 416.261594  | 208.634435      | 399.235045     | 200.121160       |                |                  | 4 |
| 6 | 911.465516 | 456.236396      | 894.438967     | 447.723121       | 893.454951     | 447.231113       | V    | 345.224480  | 173.115878      | 328.197931     | 164.602603       |                |                  | 3 |
| 7 | 982.502630 | 491.754953      | 965.476081     | 483.241678       | 964.492065     | 482.749670       | A    | 246.156066  | 123.581671      | 229.129517     | 115.068396       |                |                  | 2 |
| 8 |            |                 |                |                  |                |                  | R    | 175.118952  | 88.063114       | 158.092403     | 79.549839        |                |                  | 1 |

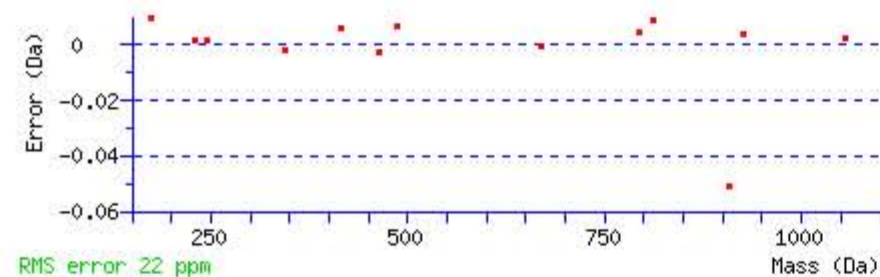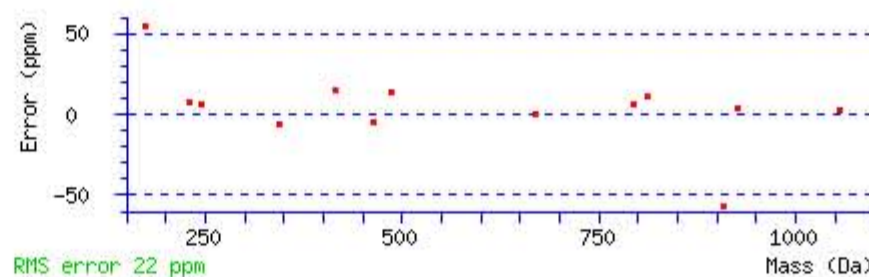

NCBI BLAST search of [TEQAAVAR](#)

(Parameters: blastp, nr protein database, expect=20000, no filter, PAM30)

Other BLAST [web gateways](#)

All matches to this query

| Score | Mr(calc):   | Delta     | Sequence                    |
|-------|-------------|-----------|-----------------------------|
| 42.4  | 1155.607010 | -0.003762 | <a href="#">TEQAAVAR</a>    |
| 8.3   | 1155.588394 | 0.014854  | <a href="#">VEQIEAGTPGR</a> |
| 6.1   | 1155.607025 | -0.003777 | <a href="#">VQDSAVAR</a>    |
| 2.2   | 1155.614883 | -0.011635 | <a href="#">RSGDWLLPGR</a>  |

Mascot: <http://www.matrixscience.com/>





# MASCOT Search Results

## Peptide View

MS/MS Fragmentation of **AQMDLSGR**  
 Found in **F13A\_HUMAN**, Coagulation factor XIII A chain OS=Homo sapiens GN=F13A1 PE=1 SV=4

Match to Query 17453: 1187.574488 from(594.794520,2+) rtinseconds(1758) index(17490)  
 Title: Locus:1.1.1.3178.5 File:"2013-07-02 CLN FXIII 180 min 3rd F 2.wiff"  
 Data file C:\Program Files (x86)\Matrix Science\Mascot Daemon\mgf9 FXIII 180 min 3rd\mascot\_daemon\_merge.mgf

Click mouse within plot area to zoom in by factor of two about that point  
 Or, Plot from  to  Da   
 Label all possible matches  Label matches used for scoring

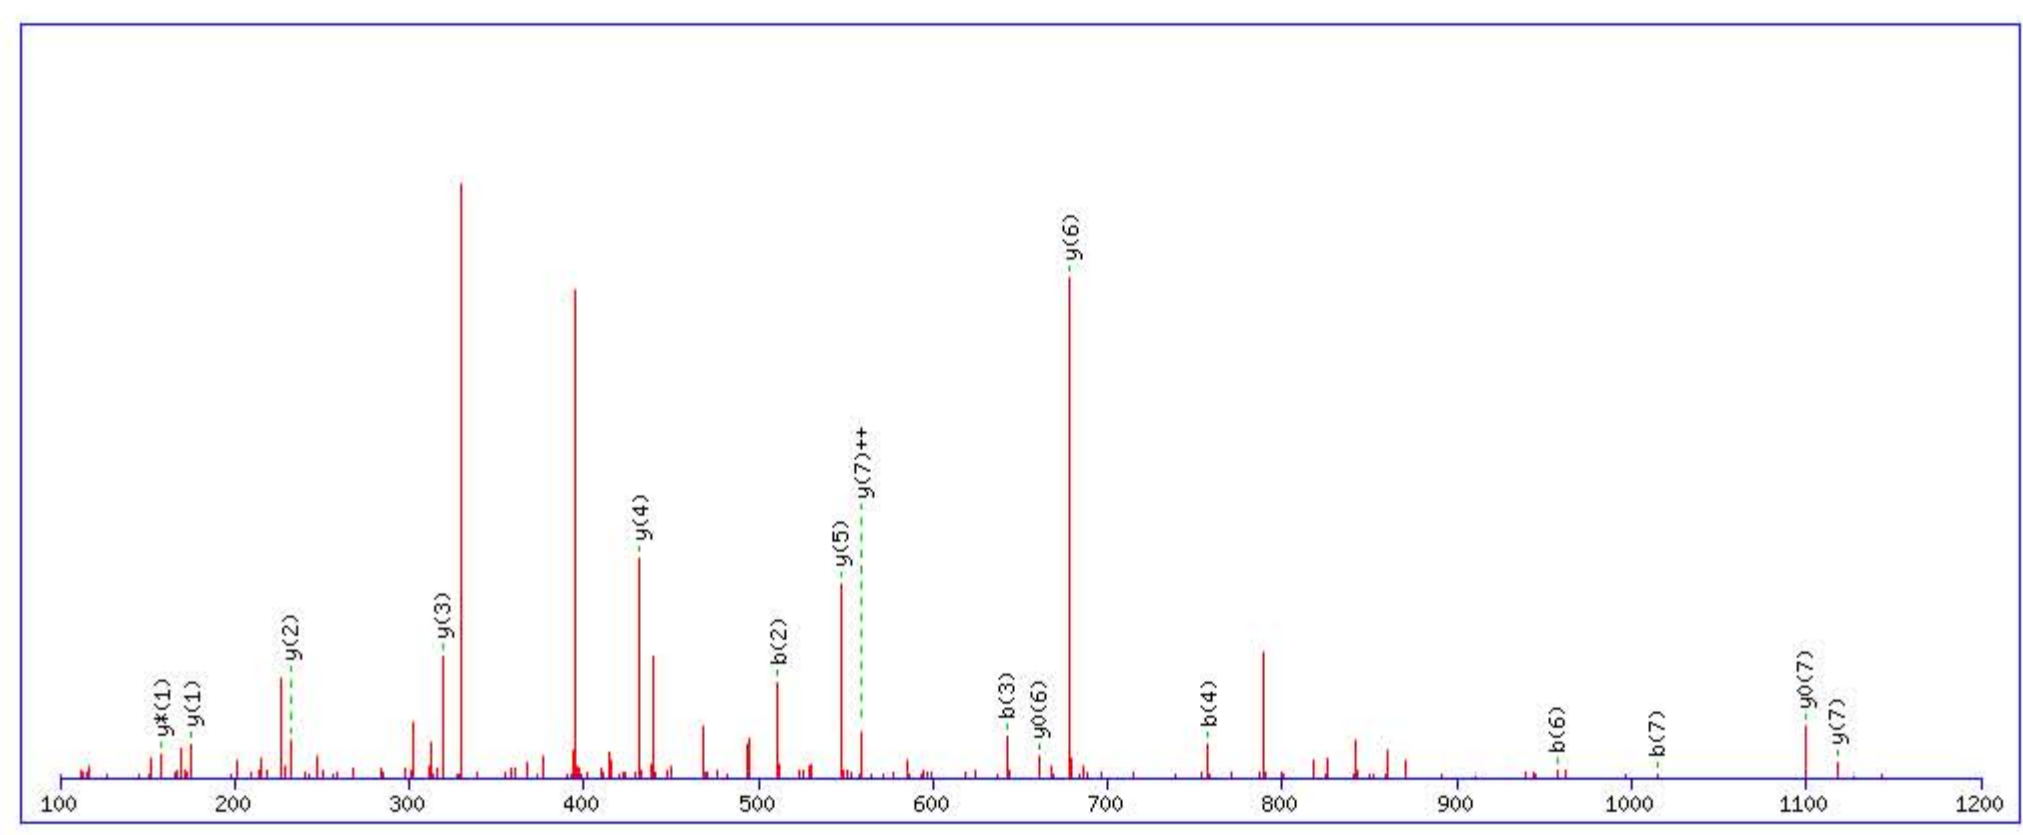

Monoisotopic mass of neutral peptide Mr(calc): 1187.579086  
 Fixed modifications: Carbamidomethyl (C) (apply to specified residues or termini only)  
 Variable modifications:  
 Q2 : Biotin:Thermo-21345 (Q)  
 Ions Score: 38 Expect: 0.0027  
 Matches : 16/72 fragment ions using 32 most intense peaks [\(help\)](#)

| # | b                  | b <sup>++</sup> | b <sup>*</sup> | b <sup>*++</sup> | b <sup>0</sup> | b <sup>0++</sup> | Seq. | y                  | y <sup>++</sup>   | y <sup>*</sup>    | y <sup>*++</sup> | y <sup>0</sup>     | y <sup>0++</sup> | # |
|---|--------------------|-----------------|----------------|------------------|----------------|------------------|------|--------------------|-------------------|-------------------|------------------|--------------------|------------------|---|
| 1 | 72.044390          | 36.525833       |                |                  |                |                  | A    |                    |                   |                   |                  |                    |                  | 8 |
| 2 | <b>511.269716</b>  | 256.138496      | 494.243167     | 247.625221       |                |                  | Q    | <b>1117.549262</b> | <b>559.278269</b> | 1100.522713       | 550.764995       | <b>1099.538697</b> | 550.272987       | 7 |
| 3 | <b>642.310201</b>  | 321.658739      | 625.283652     | 313.145464       |                |                  | M    | <b>678.323936</b>  | 339.665606        | 661.297387        | 331.152332       | <b>660.313371</b>  | 330.660324       | 6 |
| 4 | <b>757.337144</b>  | 379.172210      | 740.310595     | 370.658935       | 739.326579     | 370.166927       | D    | <b>547.283451</b>  | 274.145364        | 530.256902        | 265.632089       | 529.272886         | 265.140081       | 5 |
| 5 | 870.421208         | 435.714242      | 853.394659     | 427.200967       | 852.410643     | 426.708959       | L    | <b>432.256508</b>  | 216.631892        | 415.229959        | 208.118617       | 414.245943         | 207.626609       | 4 |
| 6 | <b>957.453236</b>  | 479.230256      | 940.426687     | 470.716981       | 939.442671     | 470.224973       | S    | <b>319.172444</b>  | 160.089860        | 302.145895        | 151.576585       | 301.161879         | 151.084577       | 3 |
| 7 | <b>1014.474700</b> | 507.740988      | 997.448151     | 499.227713       | 996.464135     | 498.735705       | G    | <b>232.140416</b>  | 116.573846        | 215.113867        | 108.060571       |                    |                  | 2 |
| 8 |                    |                 |                |                  |                |                  | R    | <b>175.118952</b>  | 88.063114         | <b>158.092403</b> | 79.549839        |                    |                  | 1 |

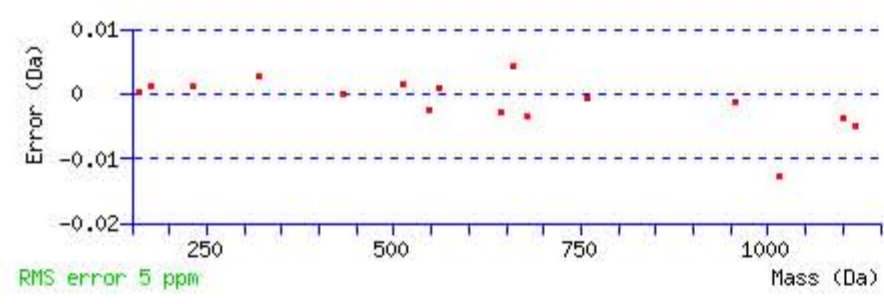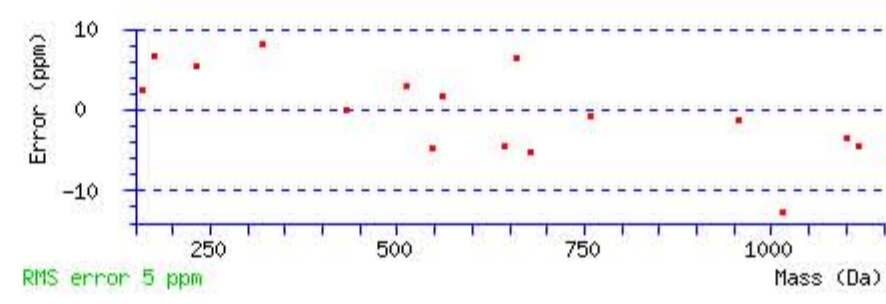

NCBI BLAST search of **AQMDLSGR**  
 (Parameters: blastp, nr protein database, expect=20000, no filter, PAM30)  
 Other BLAST [web gateways](#)

### All matches to this query

| Score | Mr(calc):   | Delta     | Sequence                    |
|-------|-------------|-----------|-----------------------------|
| 37.8  | 1187.579086 | -0.004598 | <a href="#">AQMDLSGR</a>    |
| 10.5  | 1187.578201 | -0.003713 | <a href="#">SSLENEPSLGR</a> |
| 9.0   | 1187.568344 | 0.006144  | <a href="#">DHGFKVSADGR</a> |
| 7.5   | 1187.579086 | -0.004598 | <a href="#">QAAEVMGR</a>    |
| 6.2   | 1187.590302 | -0.015814 | <a href="#">AQEAMRR</a>     |
| 5.3   | 1187.568314 | 0.006174  | <a href="#">QREDIWEGR</a>   |
| 3.6   | 1187.557083 | 0.017405  | <a href="#">EIGDVENWAR</a>  |
| 3.1   | 1187.564255 | 0.010233  | <a href="#">ARREEEENR</a>   |
| 2.2   | 1187.575714 | -0.001226 | <a href="#">YQDAAGPR</a>    |
| 1.8   | 1187.557968 | 0.016520  | <a href="#">QPCPYGR</a>     |

# MASCOT SCIENCE Mascot Search Results

## Peptide View

MS/MS Fragmentation of **FQEGQEEER**

Found in **F13A\_HUMAN**, Coagulation factor XIII A chain OS=Homo sapiens GN=F13A1 PE=1 SV=4

Match to Query 26184: 1461.647308 from(731.830930,2+) rtinseconds(1509) index(15903)

Title: Locus:1.1.1.3091.13 File:"2013-07-02 CLN FXIII 180 min 3rd F 2.wiff"

Data file C:\Program Files (x86)\Matrix Science\Mascot Daemon\mgf9 FXIII 180 min 3rd\mascot\_daemon\_merge.mgf

Click mouse within plot area to zoom in by factor of two about that point

Or, Plot from  to  Da

Label all possible matches  Label matches used for scoring

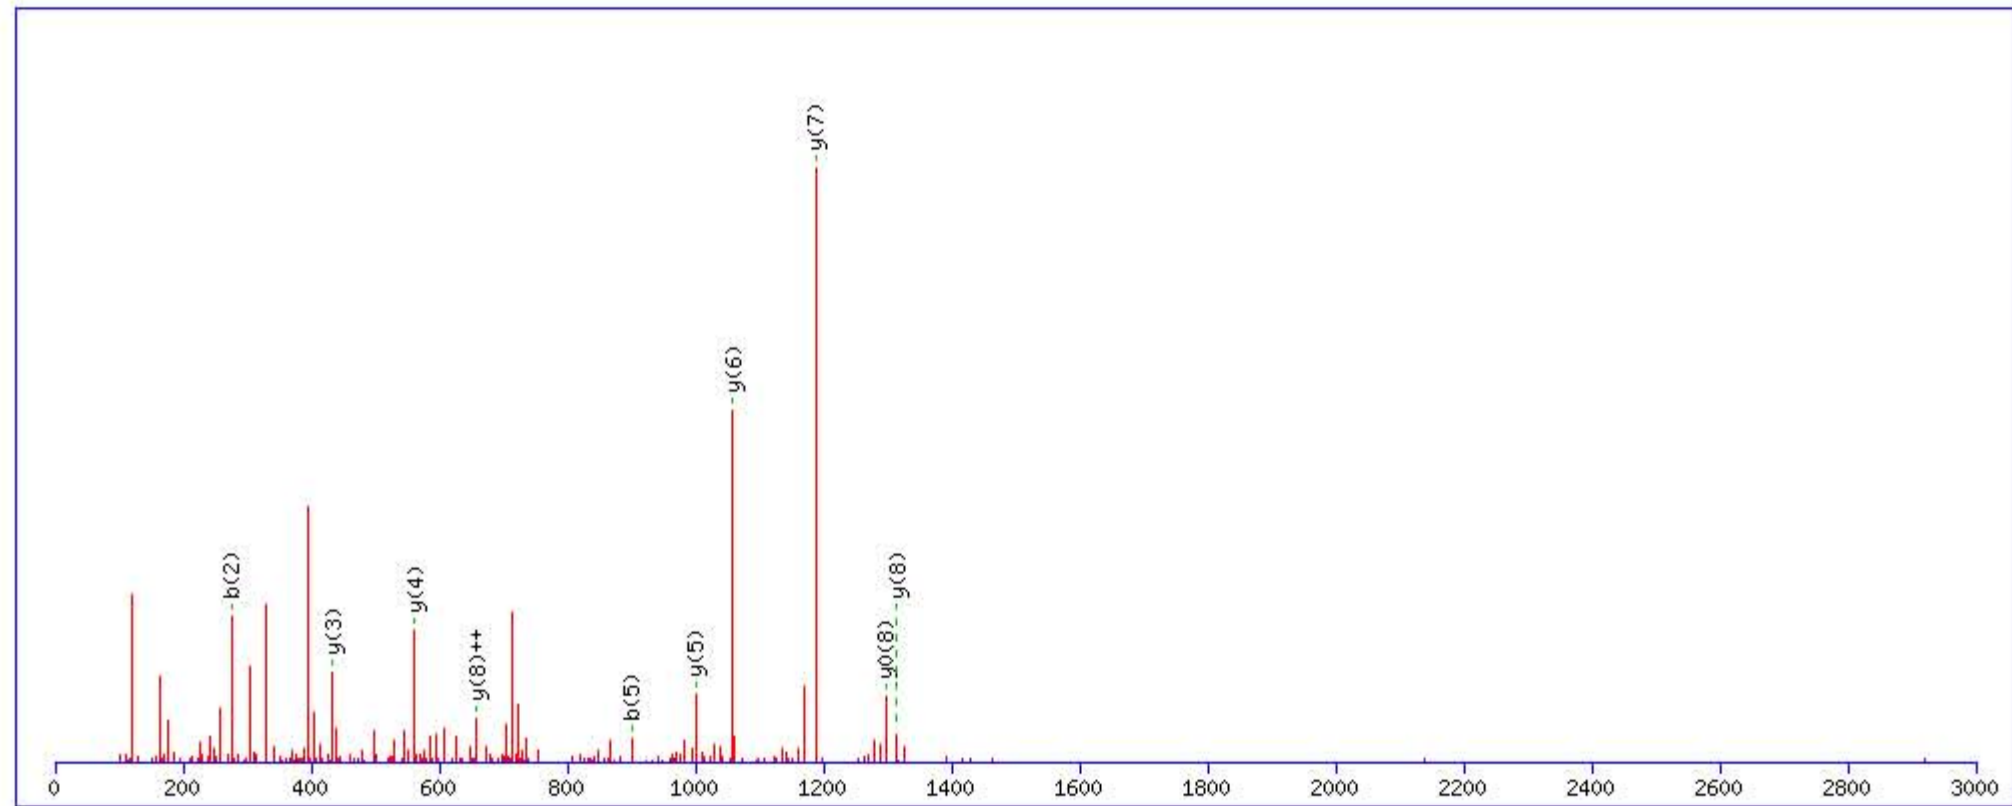

Monoisotopic mass of neutral peptide Mr(calc): 1461.655807

Fixed modifications: Carbamidomethyl (C) (apply to specified residues or termini only)

Variable modifications:

Q5 : Biotin:Thermo-21345 (Q)

Ions Score: 46 Expect: 0.00016

Matches : 10/88 fragment ions using 14 most intense peaks ([help](#))

| # | b                 | b <sup>++</sup> | b <sup>+</sup> | b <sup>+++</sup> | b <sup>0</sup> | b <sup>0++</sup> | Seq. | y                  | y <sup>++</sup>   | y <sup>+</sup> | y <sup>+++</sup> | y <sup>0</sup>     | y <sup>0++</sup> | # |
|---|-------------------|-----------------|----------------|------------------|----------------|------------------|------|--------------------|-------------------|----------------|------------------|--------------------|------------------|---|
| 1 | 148.075690        | 74.541483       |                |                  |                |                  | F    |                    |                   |                |                  |                    |                  | 9 |
| 2 | <b>276.134268</b> | 138.570772      | 259.107719     | 130.057497       |                |                  | Q    | <b>1315.594692</b> | <b>658.300984</b> | 1298.568143    | 649.787710       | <b>1297.584127</b> | 649.295702       | 8 |
| 3 | 405.176861        | 203.092068      | 388.150312     | 194.578794       | 387.166296     | 194.086786       | E    | <b>1187.536114</b> | 594.271695        | 1170.509565    | 585.758421       | 1169.525549        | 585.266413       | 7 |
| 4 | 462.198325        | 231.602800      | 445.171776     | 223.089526       | 444.187760     | 222.597518       | G    | <b>1058.493521</b> | 529.750399        | 1041.466972    | 521.237124       | 1040.482956        | 520.745116       | 6 |
| 5 | <b>901.423651</b> | 451.215464      | 884.397102     | 442.702189       | 883.413086     | 442.210181       | Q    | <b>1001.472057</b> | 501.239667        | 984.445508     | 492.726392       | 983.461492         | 492.234384       | 5 |
| 6 | 1030.466244       | 515.736760      | 1013.439695    | 507.223485       | 1012.455679    | 506.731477       | E    | <b>562.246731</b>  | 281.627004        | 545.220182     | 273.113729       | 544.236166         | 272.621721       | 4 |
| 7 | 1159.508837       | 580.258057      | 1142.482288    | 571.744782       | 1141.498272    | 571.252774       | E    | <b>433.204138</b>  | 217.105707        | 416.177589     | 208.592433       | 415.193573         | 208.100425       | 3 |
| 8 | 1288.551430       | 644.779353      | 1271.524881    | 636.266079       | 1270.540865    | 635.774071       | E    | 304.161545         | 152.584411        | 287.134996     | 144.071136       | 286.150980         | 143.579128       | 2 |
| 9 |                   |                 |                |                  |                |                  | R    | 175.118952         | 88.063114         | 158.092403     | 79.549839        |                    |                  | 1 |

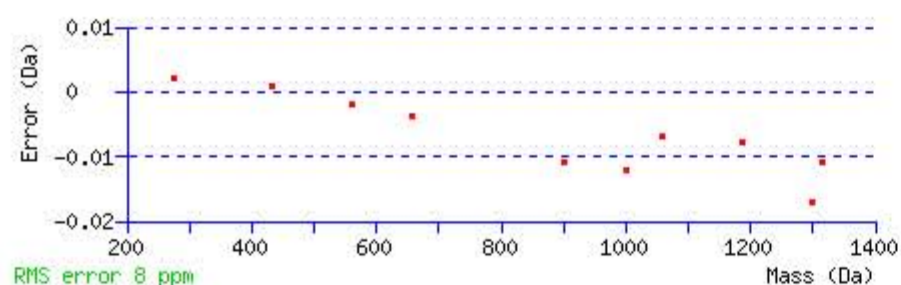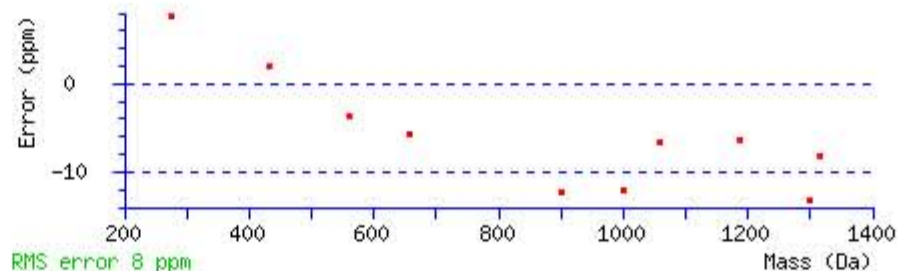

NCBI BLAST search of **FQEGQEEER**

(Parameters: blastp, nr protein database, expect=20000, no filter, PAM30)

Other BLAST [web gateways](#)

## All matches to this query

| Score | Mr(calc):   | Delta     | Sequence                      |
|-------|-------------|-----------|-------------------------------|
| 45.7  | 1461.655807 | -0.008499 | <a href="#">FQEGQEEER</a>     |
| 11.0  | 1461.640564 | 0.006744  | <a href="#">NSGTQSDGEEK</a>   |
| 8.0   | 1461.648392 | -0.001084 | <a href="#">HREELSDYEER</a>   |
| 8.0   | 1461.655807 | -0.008499 | <a href="#">FQEGQEEER</a>     |
| 6.4   | 1461.640564 | 0.006744  | <a href="#">VMTDVAGNPEEER</a> |
| 2.6   | 1461.637161 | 0.010147  | <a href="#">ESELQWQEEER</a>   |
| 1.6   | 1461.651794 | -0.004486 | <a href="#">ATSQHECSSSQLK</a> |

# MASCOT Search Results

## Peptide View

MS/MS Fragmentation of **HVYGELDVQIQR**

Found in **F13A\_HUMAN**, Coagulation factor XIII A chain OS=Homo sapiens GN=F13A1 PE=1 SV=4

Match to Query 34995: 1766.909892 from(589.977240,3+) rtinseconds(1951) index(18755)

Title: Locus:1.1.1.3245.7 File:"2013-07-02 CLN FXIII 180 min 3rd F 2.wiff"

Data file C:\Program Files (x86)\Matrix Science\Mascot Daemon\mgf9 FXIII 180 min 3rd\mascot\_daemon\_merge.mgf

Click mouse within plot area to zoom in by factor of two about that point

Or, Plot from  to  Da

Label all possible matches  Label matches used for scoring

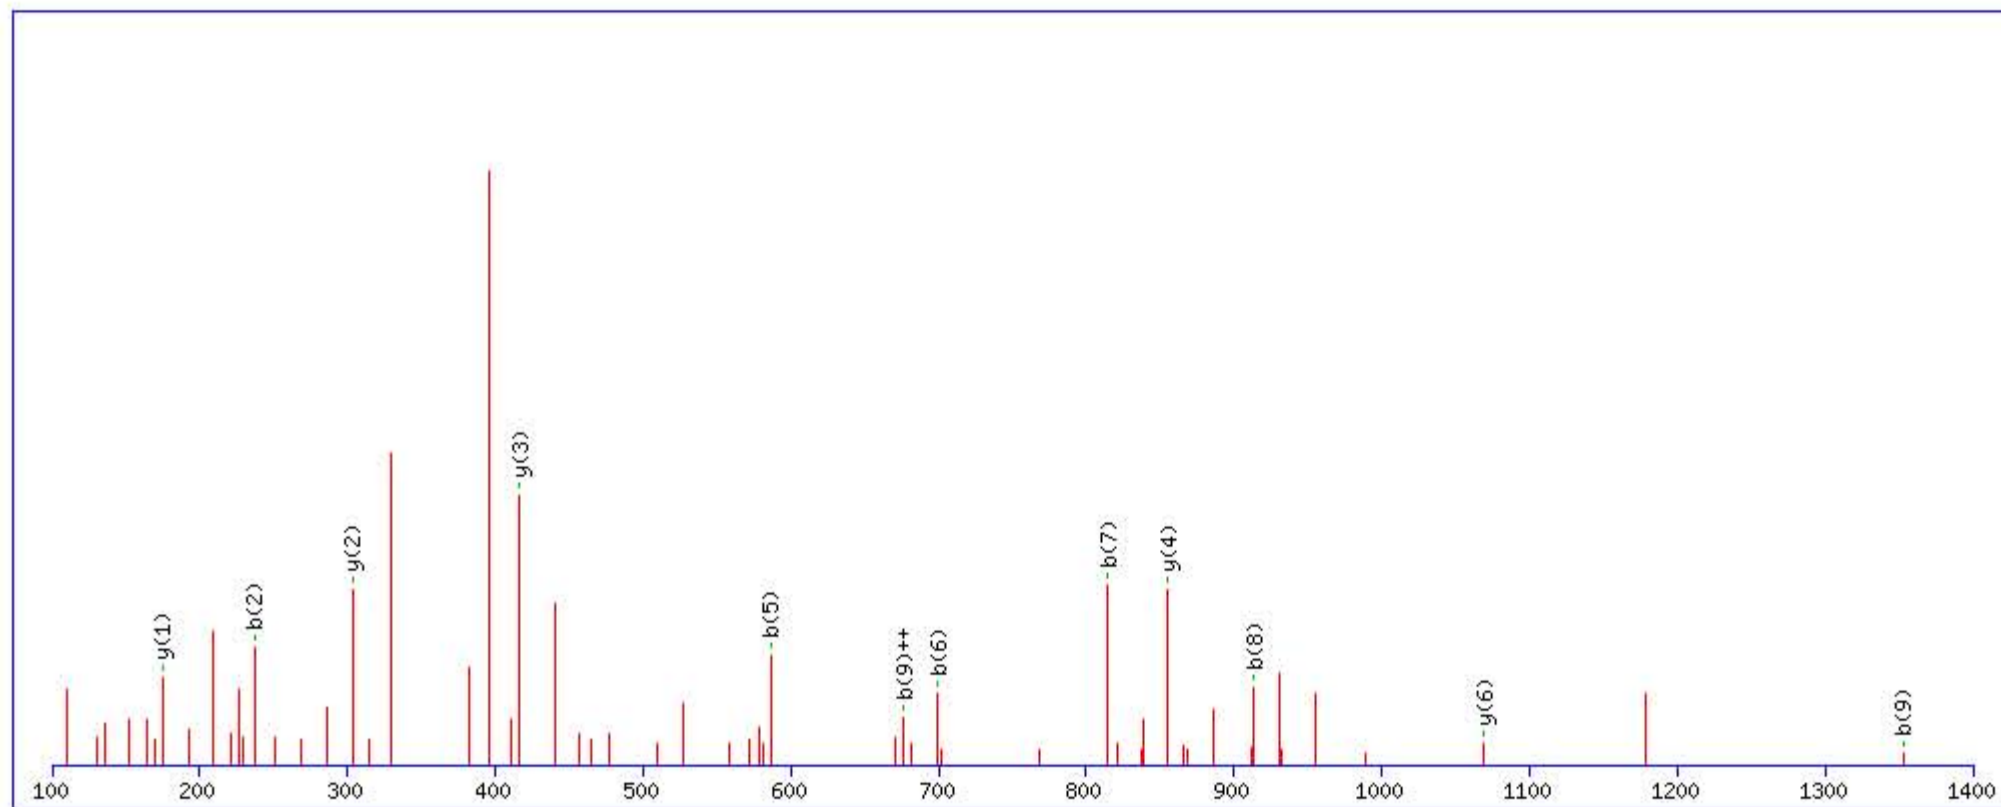

Monoisotopic mass of neutral peptide Mr(calc): 1766.913773

Fixed modifications: Carbamidomethyl (C) (apply to specified residues or termini only)

Variable modifications:

Q9 : Biotin:Thermo-21345 (Q)

Ions Score: 36 Expect: 0.0014

Matches : 12/98 fragment ions using 20 most intense peaks [\(help\)](#)

| #  | b                  | b <sup>++</sup>   | b <sup>*</sup> | b <sup>*++</sup> | b <sup>0</sup> | b <sup>0++</sup> | Seq. | y                  | y <sup>++</sup> | y <sup>*</sup> | y <sup>*++</sup> | y <sup>0</sup> | y <sup>0++</sup> | #  |
|----|--------------------|-------------------|----------------|------------------|----------------|------------------|------|--------------------|-----------------|----------------|------------------|----------------|------------------|----|
| 1  | 138.066188         | 69.536732         |                |                  |                |                  | H    |                    |                 |                |                  |                |                  | 12 |
| 2  | <b>237.134602</b>  | 119.070939        |                |                  |                |                  | V    | 1630.862141        | 815.934708      | 1613.835592    | 807.421434       | 1612.851576    | 806.929426       | 11 |
| 3  | 400.197931         | 200.602603        |                |                  |                |                  | Y    | 1531.793727        | 766.400501      | 1514.767178    | 757.887227       | 1513.783162    | 757.395219       | 10 |
| 4  | 457.219395         | 229.113335        |                |                  |                |                  | G    | 1368.730398        | 684.868837      | 1351.703849    | 676.355563       | 1350.719833    | 675.863554       | 9  |
| 5  | <b>586.261988</b>  | 293.634632        |                |                  | 568.251423     | 284.629349       | E    | 1311.708934        | 656.358105      | 1294.682385    | 647.844830       | 1293.698369    | 647.352822       | 8  |
| 6  | <b>699.346052</b>  | 350.176664        |                |                  | 681.335487     | 341.171382       | L    | 1182.666341        | 591.836808      | 1165.639792    | 583.323534       | 1164.655776    | 582.831526       | 7  |
| 7  | <b>814.372995</b>  | 407.690136        |                |                  | 796.362430     | 398.684853       | D    | <b>1069.582277</b> | 535.294776      | 1052.555728    | 526.781502       | 1051.571712    | 526.289494       | 6  |
| 8  | <b>913.441409</b>  | 457.224342        |                |                  | 895.430844     | 448.219060       | V    | 954.555334         | 477.781305      | 937.528785     | 469.268030       |                |                  | 5  |
| 9  | <b>1352.666735</b> | <b>676.837006</b> | 1335.640186    | 668.323731       | 1334.656170    | 667.831723       | Q    | <b>855.486920</b>  | 428.247098      | 838.460371     | 419.733823       |                |                  | 4  |
| 10 | 1465.750799        | 733.379037        | 1448.724250    | 724.865763       | 1447.740234    | 724.373755       | I    | <b>416.261594</b>  | 208.634435      | 399.235045     | 200.121160       |                |                  | 3  |
| 11 | 1593.809377        | 797.408326        | 1576.782828    | 788.895052       | 1575.798812    | 788.403044       | Q    | <b>303.177530</b>  | 152.092403      | 286.150981     | 143.579128       |                |                  | 2  |
| 12 |                    |                   |                |                  |                |                  | R    | <b>175.118952</b>  | 88.063114       | 158.092403     | 79.549839        |                |                  | 1  |

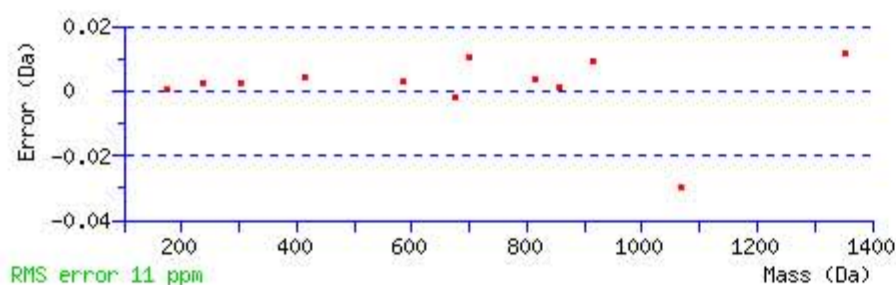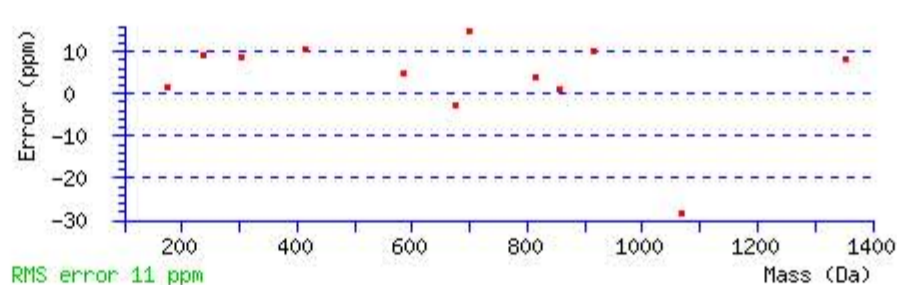

NCBI BLAST search of **HVYGELDVQIQR**

(Parameters: blastp, nr protein database, expect=20000, no filter, PAM30)

Other BLAST [web gateways](#)

## All matches to this query

| Score | Mr(calc):   | Delta     | Sequence                         |
|-------|-------------|-----------|----------------------------------|
| 36.0  | 1766.913773 | -0.003881 | <a href="#">HVYGELDVQIQR</a>     |
| 15.6  | 1766.913773 | -0.003881 | <a href="#">HVYGELDVQIQR</a>     |
| 5.4   | 1766.888138 | 0.021754  | <a href="#">IMQNGTILYTMR</a>     |
| 4.9   | 1766.917130 | -0.007238 | <a href="#">KLSSQLVEHCQK</a>     |
| 0.3   | 1766.924988 | -0.015096 | <a href="#">GNFPVEAVKMQHAIAR</a> |

Mascot: <http://www.matrixscience.com/>

# MASCOT Search Results

## Peptide View

MS/MS Fragmentation of **FQEGQEER**

Found in **F13A\_HUMAN**, Coagulation factor XIII A chain OS=Homo sapiens GN=F13A1 PE=1 SV=4

Match to Query 35192: 1772.832148 from(887.423350,2+) rtinseconds(1903) index(4260)

Title: Locus:1.1.1.3182.15 File:"2013-07-02 CLN FXIII 180 min 3rd F 1.wiff"

Data file C:\Program Files (x86)\Matrix Science\Mascot Daemon\mgf9 FXIII 180 min 3rd\mascot\_daemon\_merge.mgf

Click mouse within plot area to zoom in by factor of two about that point

Or, Plot from  to  Da

Label all possible matches  Label matches used for scoring

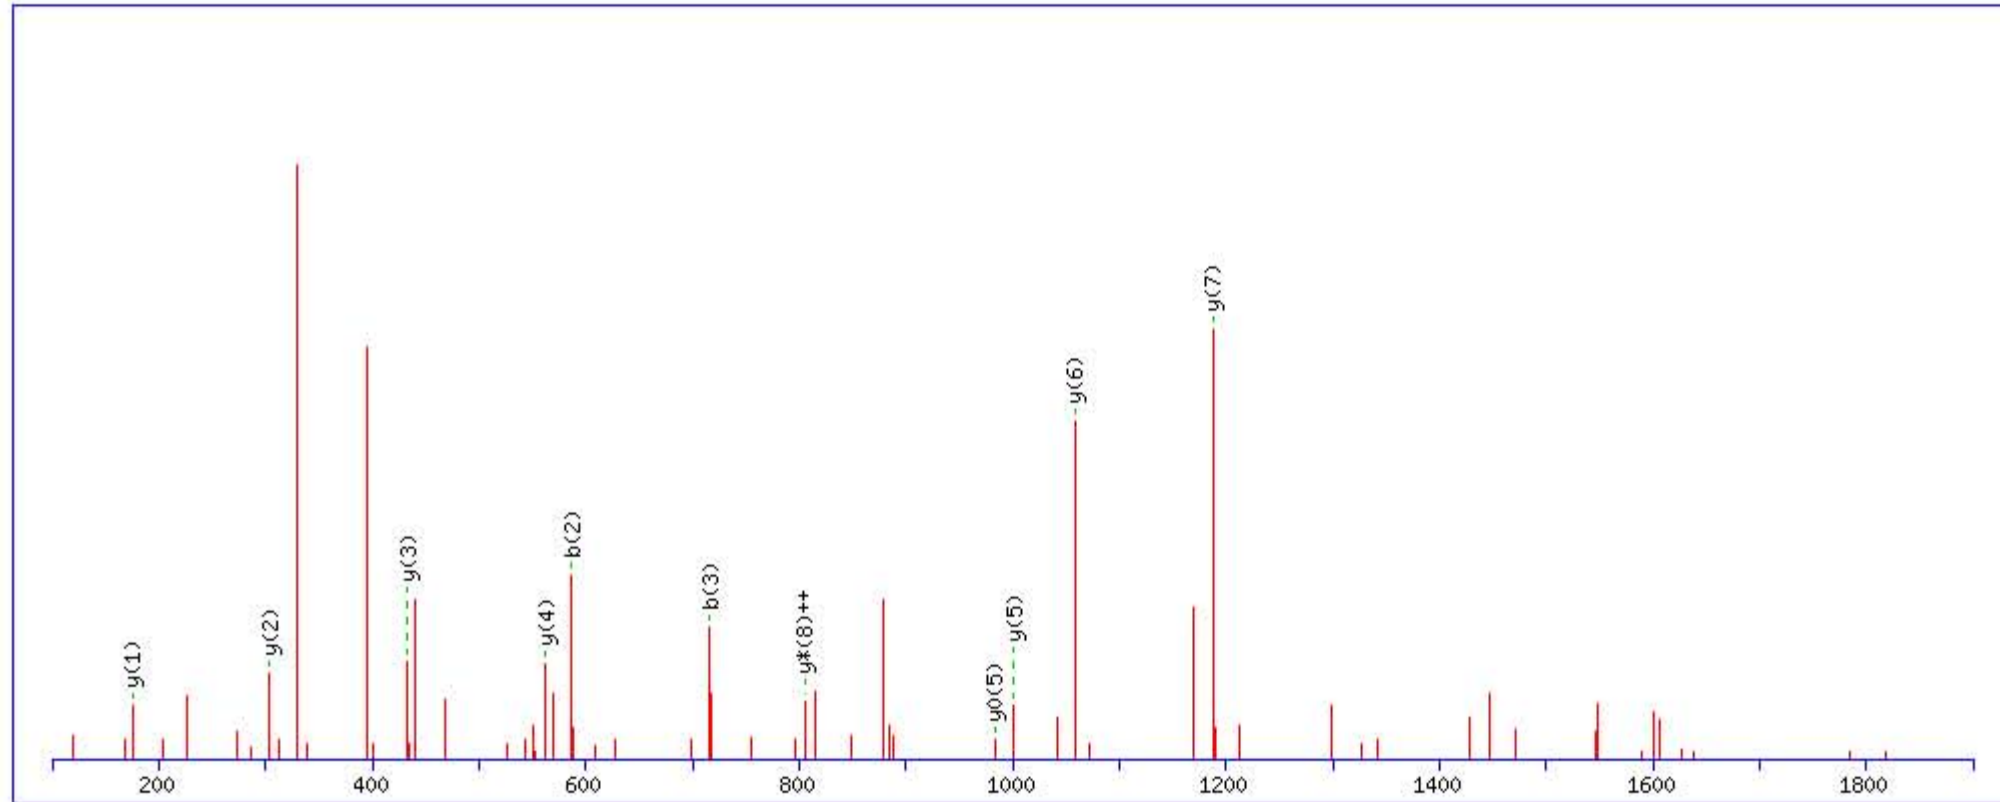

Monoisotopic mass of neutral peptide  $M_r(\text{calc})$ : 1772.822556

Fixed modifications: Carbamidomethyl (C) (apply to specified residues or termini only)

Variable modifications:

Q2 : Biotin:Thermo-21345 (Q)

Q5 : Biotin:Thermo-21345 (Q)

Ions Score: 26 Expect: 0.034

Matches : 11/88 fragment ions using 32 most intense peaks ([help](#))

| # | b                 | b <sup>++</sup> | b <sup>*</sup> | b <sup>*++</sup> | b <sup>0</sup> | b <sup>0++</sup> | Seq. | y                  | y <sup>++</sup> | y <sup>*</sup> | y <sup>*++</sup>  | y <sup>0</sup>    | y <sup>0++</sup> | # |
|---|-------------------|-----------------|----------------|------------------|----------------|------------------|------|--------------------|-----------------|----------------|-------------------|-------------------|------------------|---|
| 1 | 148.075690        | 74.541483       |                |                  |                |                  | F    |                    |                 |                |                   |                   |                  | 9 |
| 2 | <b>587.301016</b> | 294.154146      | 570.274467     | 285.640872       |                |                  | Q    | 1626.761440        | 813.884358      | 1609.734891    | <b>805.371084</b> | 1608.750875       | 804.879076       | 8 |
| 3 | <b>716.343609</b> | 358.675443      | 699.317060     | 350.162168       | 698.333044     | 349.670160       | E    | <b>1187.536114</b> | 594.271695      | 1170.509565    | 585.758421        | 1169.525549       | 585.266413       | 7 |
| 4 | 773.365073        | 387.186175      | 756.338524     | 378.672900       | 755.354508     | 378.180892       | G    | <b>1058.493521</b> | 529.750399      | 1041.466972    | 521.237124        | 1040.482956       | 520.745116       | 6 |
| 5 | 1212.590399       | 606.798837      | 1195.563850    | 598.285563       | 1194.579834    | 597.793555       | Q    | <b>1001.472057</b> | 501.239667      | 984.445508     | 492.726392        | <b>983.461492</b> | 492.234384       | 5 |
| 6 | 1341.632992       | 671.320134      | 1324.606443    | 662.806860       | 1323.622427    | 662.314852       | E    | <b>562.246731</b>  | 281.627004      | 545.220182     | 273.113729        | 544.236166        | 272.621721       | 4 |
| 7 | 1470.675585       | 735.841431      | 1453.649036    | 727.328156       | 1452.665020    | 726.836148       | E    | <b>433.204138</b>  | 217.105707      | 416.177589     | 208.592433        | 415.193573        | 208.100425       | 3 |
| 8 | 1599.718178       | 800.362727      | 1582.691629    | 791.849453       | 1581.707613    | 791.357445       | E    | <b>304.161545</b>  | 152.584411      | 287.134996     | 144.071136        | 286.150980        | 143.579128       | 2 |
| 9 |                   |                 |                |                  |                |                  | R    | <b>175.118952</b>  | 88.063114       | 158.092403     | 79.549839         |                   |                  | 1 |

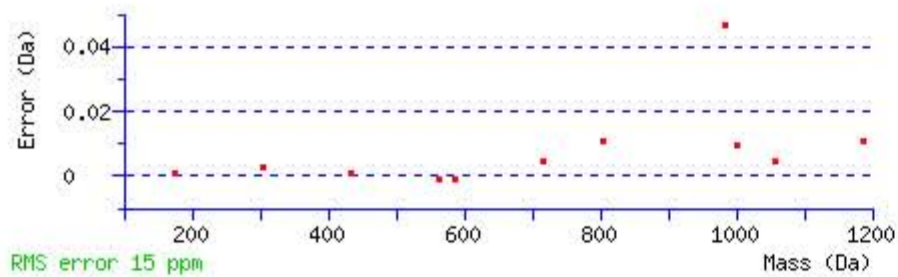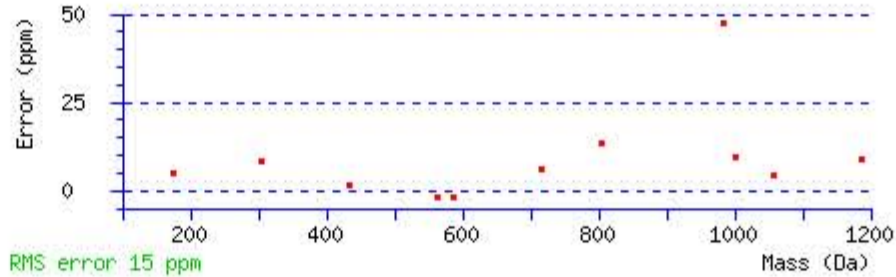

NCBI BLAST search of **FQEGQEER**

(Parameters: blastp, nr protein database, expect=20000, no filter, PAM30)

Other BLAST [web gateways](#)

All matches to this query

| Score | $M_r(\text{calc})$ : | Delta     | Sequence                             |
|-------|----------------------|-----------|--------------------------------------|
| 26.1  | 1772.822556          | 0.009592  | <a href="#">FQEGQEER</a>             |
| 14.0  | 1772.828873          | 0.003275  | <a href="#">QAEQEATVAREEQER</a>      |
| 2.4   | 1772.836288          | -0.004140 | <a href="#">ADGSLTGGGLEAAAAMAPER</a> |
| 0.7   | 1772.854904          | -0.022756 | <a href="#">AGNLMSAMLHVEALER</a>     |
| 0.3   | 1772.851532          | -0.019384 | <a href="#">YEMFLNQARKNTDK</a>       |





# MASCOT Search Results

## Peptide View

MS/MS Fragmentation of **GVNLQEFLNVTSVHLFK**  
 Found in **F13A\_HUMAN**, Coagulation factor XIII A chain OS=Homo sapiens GN=F13A1 PE=1 SV=4

Match to Query 44156: 2255.211522 from(752.744450,3+) rtinseconds(3032) index(38251)  
 Title: Locus:1.1.1.3716.8 File:"2013-07-02 CLN FXIII 180 min 3rd F 3.wiff"  
 Data file C:\Program Files (x86)\Matrix Science\Mascot Daemon\mgf\9 FXIII 180 min 3rd\mascot\_daemon\_merge.mgf

Click mouse within plot area to zoom in by factor of two about that point

Or, Plot from  to  Da Full range

Label all possible matches  Label matches used for scoring

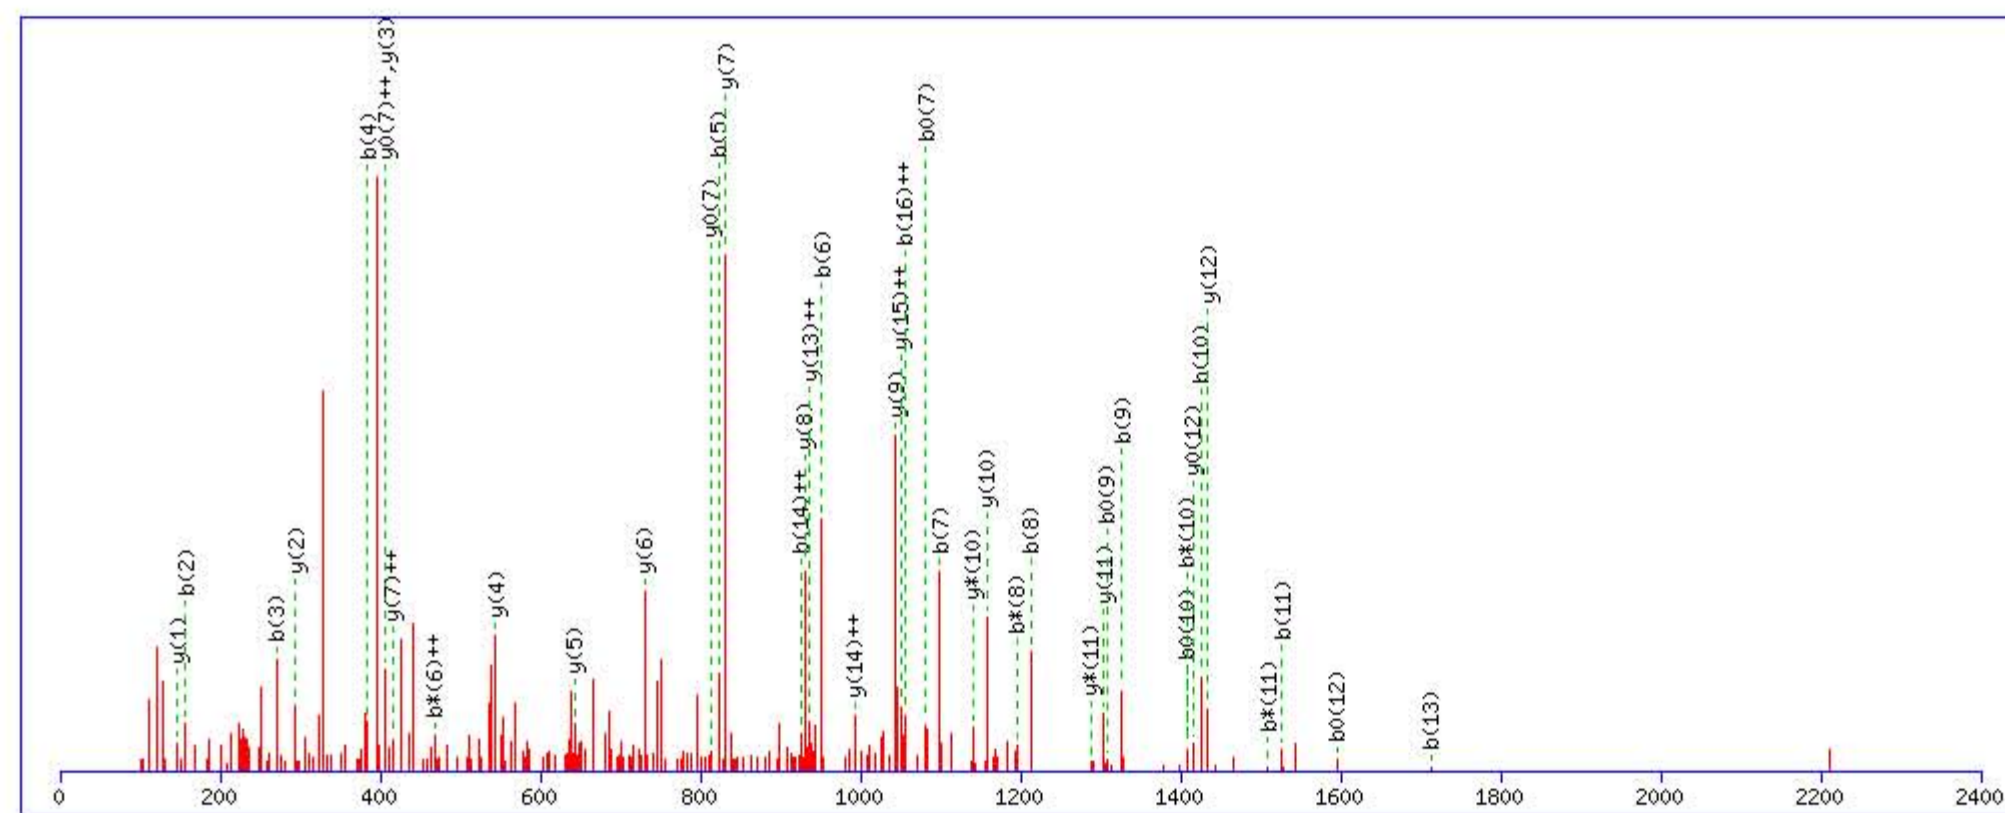

Monoisotopic mass of neutral peptide Mr(calc): 2255.213654  
 Fixed modifications: Carbamidomethyl (C) (apply to specified residues or termini only)  
 Variable modifications:  
 Q5 : Biotin:Thermo-21345 (Q)  
 Ions Score: 58 Expect: 3.4e-005  
 Matches : 42/168 fragment ions using 89 most intense peaks [\(help\)](#)

| #  | b                  | b <sup>++</sup>    | b <sup>*</sup>     | b <sup>*++</sup>  | b <sup>0</sup>     | b <sup>0++</sup> | Seq.     | y                  | y <sup>++</sup>    | y <sup>*</sup>     | y <sup>*++</sup> | y <sup>0</sup>     | y <sup>0++</sup>  | #  |
|----|--------------------|--------------------|--------------------|-------------------|--------------------|------------------|----------|--------------------|--------------------|--------------------|------------------|--------------------|-------------------|----|
| 1  | 58.028740          | 29.518008          |                    |                   |                    |                  | <b>G</b> |                    |                    |                    |                  |                    |                   | 17 |
| 2  | <b>157.097154</b>  | 79.052215          |                    |                   |                    |                  | <b>V</b> | 2199.199458        | 1100.103367        | 2182.172909        | 1091.590092      | 2181.188893        | 1091.098084       | 16 |
| 3  | <b>271.140081</b>  | 136.073679         | 254.113532         | 127.560404        |                    |                  | <b>N</b> | 2100.131044        | <b>1050.569160</b> | 2083.104495        | 1042.055885      | 2082.120479        | 1041.563877       | 15 |
| 4  | <b>384.224145</b>  | 192.615711         | 367.197596         | 184.102436        |                    |                  | <b>L</b> | 1986.088117        | <b>993.547697</b>  | 1969.061568        | 985.034422       | 1968.077552        | 984.542414        | 14 |
| 5  | <b>823.449471</b>  | 412.228374         | 806.422922         | 403.715099        |                    |                  | <b>Q</b> | 1873.004053        | <b>937.005665</b>  | 1855.977504        | 928.492390       | 1854.993488        | 928.000382        | 13 |
| 6  | <b>952.492064</b>  | 476.749670         | 935.465515         | <b>468.236396</b> | 934.481499         | 467.744388       | <b>E</b> | <b>1433.778727</b> | 717.393002         | 1416.752178        | 708.879727       | <b>1415.768162</b> | 708.387719        | 12 |
| 7  | <b>1099.560478</b> | 550.283877         | 1082.533929        | 541.770603        | <b>1081.549913</b> | 541.278595       | <b>F</b> | <b>1304.736134</b> | 652.871705         | <b>1287.709585</b> | 644.358431       | 1286.725569        | 643.866423        | 11 |
| 8  | <b>1212.644542</b> | 606.825909         | <b>1195.617993</b> | 598.312635        | 1194.633977        | 597.820627       | <b>L</b> | <b>1157.667720</b> | 579.337498         | <b>1140.641171</b> | 570.824224       | 1139.657155        | 570.332216        | 10 |
| 9  | <b>1326.687469</b> | 663.847373         | 1309.660920        | 655.334098        | <b>1308.676904</b> | 654.842090       | <b>N</b> | <b>1044.583656</b> | 522.795466         | 1027.557107        | 514.282192       | 1026.573091        | 513.790184        | 9  |
| 10 | <b>1425.755883</b> | 713.381580         | <b>1408.729334</b> | 704.868305        | <b>1407.745318</b> | 704.376297       | <b>V</b> | <b>930.540729</b>  | 465.774003         | 913.514180         | 457.260728       | 912.530164         | 456.768720        | 8  |
| 11 | <b>1526.803562</b> | 763.905419         | <b>1509.777013</b> | 755.392145        | 1508.792997        | 754.900137       | <b>T</b> | <b>831.472315</b>  | <b>416.239796</b>  | 814.445766         | 407.726521       | <b>813.461750</b>  | <b>407.234513</b> | 7  |
| 12 | 1613.835590        | 807.421433         | 1596.809041        | 798.908159        | <b>1595.825025</b> | 798.416151       | <b>S</b> | <b>730.424636</b>  | 365.715956         | 713.398087         | 357.202682       | 712.414071         | 356.710674        | 6  |
| 13 | <b>1712.904004</b> | 856.955640         | 1695.877455        | 848.442366        | 1694.893439        | 847.950358       | <b>V</b> | <b>643.392608</b>  | 322.199942         | 626.366059         | 313.686668       |                    |                   | 5  |
| 14 | 1849.962916        | <b>925.485096</b>  | 1832.936367        | 916.971822        | 1831.952351        | 916.479814       | <b>H</b> | <b>544.324194</b>  | 272.665735         | 527.297645         | 264.152461       |                    |                   | 4  |
| 15 | 1963.046980        | 982.027128         | 1946.020431        | 973.513854        | 1945.036415        | 973.021846       | <b>L</b> | <b>407.265282</b>  | 204.136279         | 390.238733         | 195.623004       |                    |                   | 3  |
| 16 | 2110.115394        | <b>1055.561335</b> | 2093.088845        | 1047.048060       | 2092.104829        | 1046.556052      | <b>F</b> | <b>294.181218</b>  | 147.594247         | 277.154669         | 139.080973       |                    |                   | 2  |
| 17 |                    |                    |                    |                   |                    |                  | <b>K</b> | <b>147.112804</b>  | 74.060040          | 130.086255         | 65.546765        |                    |                   | 1  |

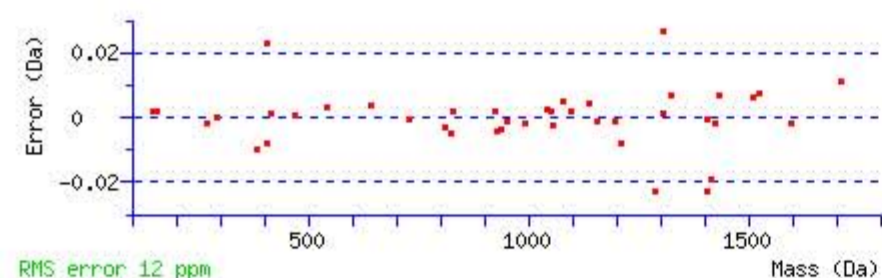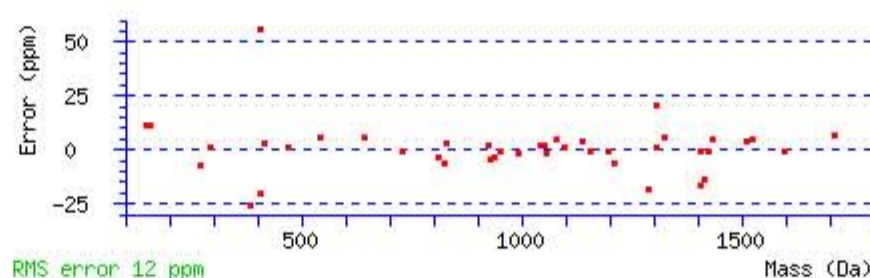

NCBI BLAST search of [GVNLQEFLNVTSVHLFK](#)  
 (Parameters: blastp, nr protein database, expect=20000, no filter, PAM30)  
 Other BLAST [web gateways](#)

### All matches to this query

| Score | Mr(calc):   | Delta     | Sequence                          |
|-------|-------------|-----------|-----------------------------------|
| 57.9  | 2255.213654 | -0.002132 | <a href="#">GVNLQEFLNVTSVHLFK</a> |



# MASCOT Search Results

## Peptide View

MS/MS Fragmentation of **FCGQLGSPLGNPPGK**

Found in **C1R\_HUMAN**, Complement C1r subcomponent OS=Homo sapiens GN=C1R PE=1 SV=2

Match to Query 36428: 1838.907788 from(920.461170,2+) rtinseconds(2120) index(46717)

Title: Locus:1.1.1.3450.20 File:"2013-07-02 CLN FXIII 180 min 3rd F 4.wiff"

Data file C:\Program Files (x86)\Matrix Science\Mascot Daemon\mgf9 FXIII 180 min 3rd\mascot\_daemon\_merge.mgf

Click mouse within plot area to zoom in by factor of two about that point

Or,  Plot from  to  Da

Label all possible matches  Label matches used for scoring

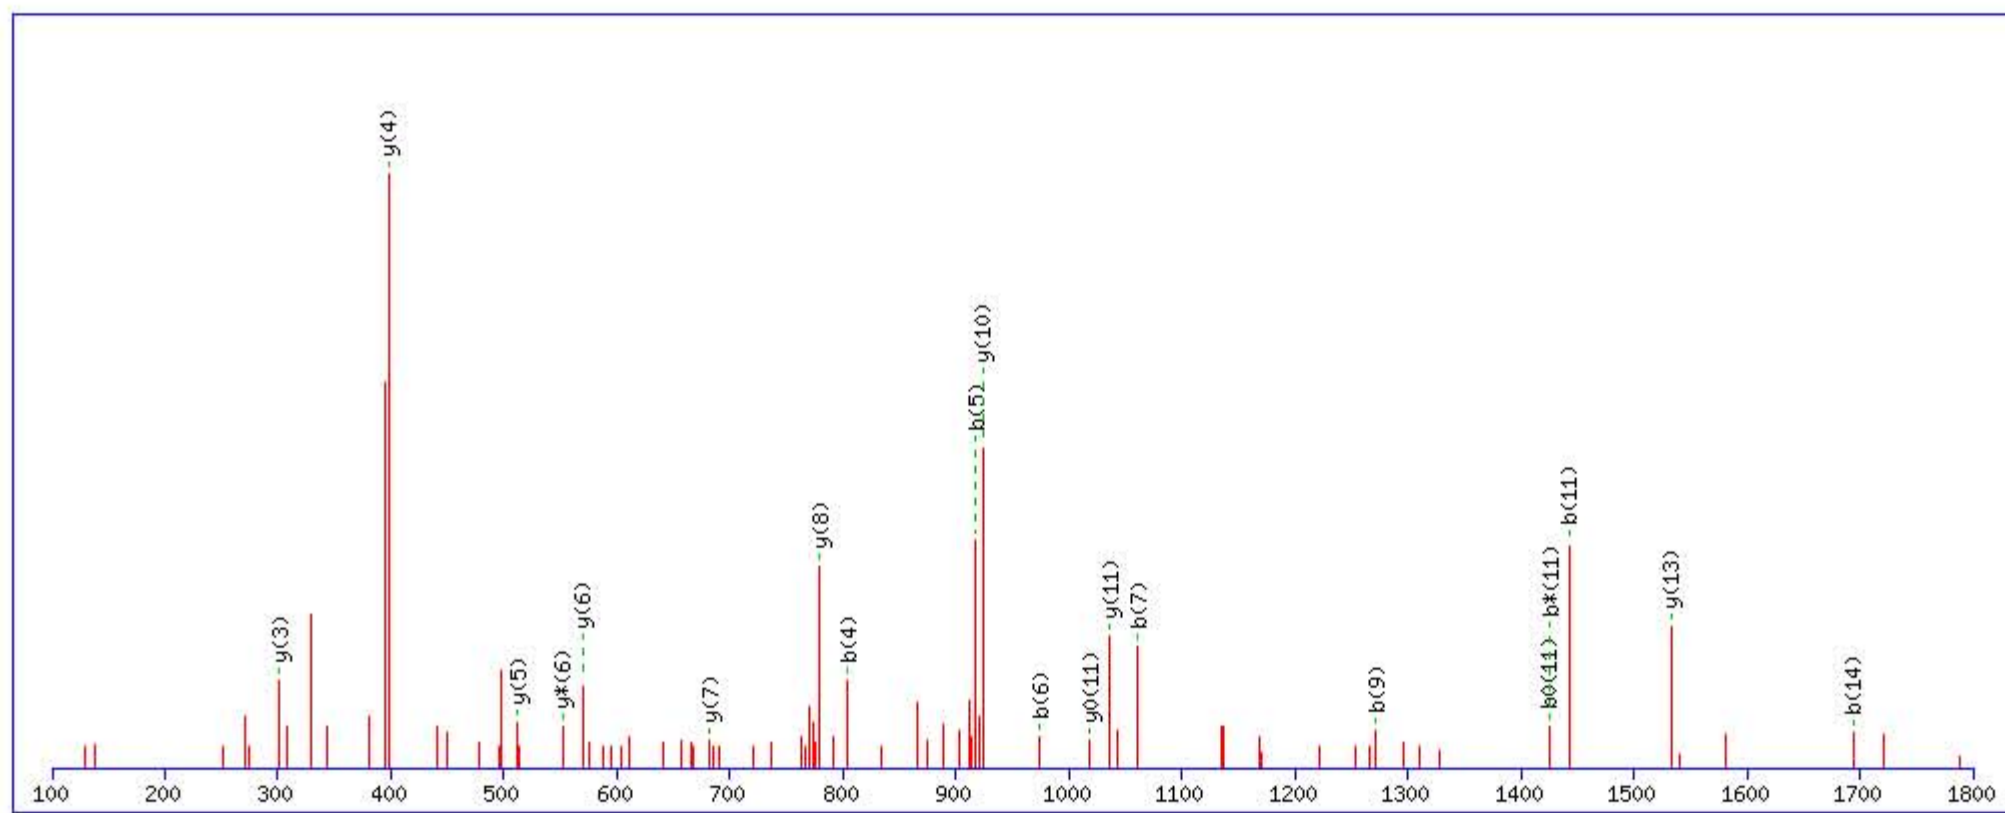

Monoisotopic mass of neutral peptide Mr(calc): 1838.917160

Fixed modifications: Carbamidomethyl (C) (apply to specified residues or termini only)

Variable modifications:

Q4 : Biotin:Thermo-21345 (Q)

Ions Score: 62 Expect: 2.2e-006

Matches : 20/134 fragment ions using 32 most intense peaks [\(help\)](#)

| #  | b                  | b <sup>++</sup> | b <sup>*</sup>     | b <sup>*++</sup> | b <sup>0</sup>     | b <sup>0++</sup> | Seq. | y                  | y <sup>++</sup> | y <sup>*</sup>    | y <sup>*++</sup> | y <sup>0</sup>     | y <sup>0++</sup> | #  |
|----|--------------------|-----------------|--------------------|------------------|--------------------|------------------|------|--------------------|-----------------|-------------------|------------------|--------------------|------------------|----|
| 1  | 148.075690         | 74.541483       |                    |                  |                    |                  | F    |                    |                 |                   |                  |                    |                  | 15 |
| 2  | 308.106339         | 154.556807      |                    |                  |                    |                  | C    | 1692.856010        | 846.931643      | 1675.829461       | 838.418369       | 1674.845445        | 837.926360       | 14 |
| 3  | 365.127803         | 183.067539      |                    |                  |                    |                  | G    | <b>1532.825361</b> | 766.916318      | 1515.798812       | 758.403044       | 1514.814796        | 757.911036       | 13 |
| 4  | <b>804.353129</b>  | 402.680203      | 787.326580         | 394.166928       |                    |                  | Q    | 1475.803897        | 738.405587      | 1458.777348       | 729.892312       | 1457.793332        | 729.400304       | 12 |
| 5  | <b>917.437193</b>  | 459.222235      | 900.410644         | 450.708960       |                    |                  | L    | <b>1036.578571</b> | 518.792924      | 1019.552022       | 510.279649       | <b>1018.568006</b> | 509.787641       | 11 |
| 6  | <b>974.458657</b>  | 487.732967      | 957.432108         | 479.219692       |                    |                  | G    | <b>923.494507</b>  | 462.250892      | 906.467958        | 453.737617       | 905.483942         | 453.245609       | 10 |
| 7  | <b>1061.490685</b> | 531.248981      | 1044.464136        | 522.735706       | 1043.480120        | 522.243698       | S    | 866.473043         | 433.740160      | 849.446494        | 425.226885       | 848.462478         | 424.734877       | 9  |
| 8  | 1158.543449        | 579.775363      | 1141.516900        | 571.262088       | 1140.532884        | 570.770080       | P    | <b>779.441015</b>  | 390.224145      | 762.414466        | 381.710871       |                    |                  | 8  |
| 9  | <b>1271.627513</b> | 636.317395      | 1254.600964        | 627.804120       | 1253.616948        | 627.312112       | L    | <b>682.388251</b>  | 341.697763      | 665.361702        | 333.184489       |                    |                  | 7  |
| 10 | 1328.648977        | 664.828127      | 1311.622428        | 656.314852       | 1310.638412        | 655.822844       | G    | <b>569.304187</b>  | 285.155732      | <b>552.277638</b> | 276.642457       |                    |                  | 6  |
| 11 | <b>1442.691904</b> | 721.849590      | <b>1425.665355</b> | 713.336316       | <b>1424.681339</b> | 712.844308       | N    | <b>512.282723</b>  | 256.645000      | 495.256174        | 248.131725       |                    |                  | 5  |
| 12 | 1539.744668        | 770.375972      | 1522.718119        | 761.862698       | 1521.734103        | 761.370690       | P    | <b>398.239796</b>  | 199.623536      | 381.213247        | 191.110261       |                    |                  | 4  |
| 13 | 1636.797432        | 818.902354      | 1619.770883        | 810.389080       | 1618.786867        | 809.897072       | P    | <b>301.187032</b>  | 151.097154      | 284.160483        | 142.583879       |                    |                  | 3  |
| 14 | <b>1693.818896</b> | 847.413086      | 1676.792347        | 838.899812       | 1675.808331        | 838.407804       | G    | 204.134268         | 102.570772      | 187.107719        | 94.057497        |                    |                  | 2  |
| 15 |                    |                 |                    |                  |                    |                  | K    | 147.112804         | 74.060040       | 130.086255        | 65.546765        |                    |                  | 1  |

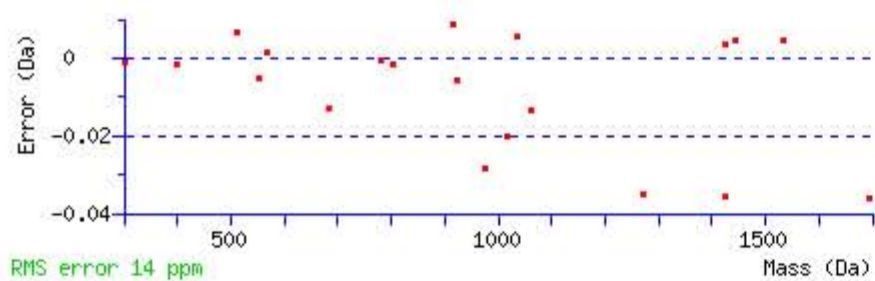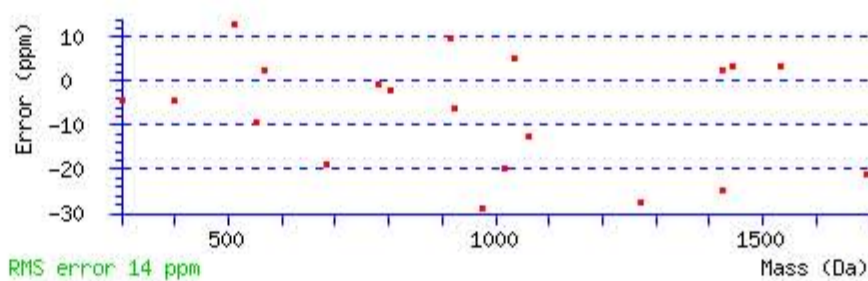

NCBI BLAST search of **FCGQLGSPLGNPPGK**

(Parameters: blastp, nr protein database, expect=20000, no filter, PAM30)

Other BLAST [web gateways](#)

### All matches to this query

| Score | Mr(calc):   | Delta     | Sequence                        |
|-------|-------------|-----------|---------------------------------|
| 61.5  | 1838.917160 | -0.009372 | <a href="#">FCGQLGSPLGNPPGK</a> |
| 1.2   | 1838.905029 | 0.002759  | <a href="#">EEFIERIQGLDFDTK</a> |

Mascot: <http://www.matrixscience.com/>

# MASCOT SEARCH RESULTS

### Peptide View

MS/MS Fragmentation of **IQYYCHEPYK**

Found in **C1R\_HUMAN**, Complement C1r subcomponent OS=Homo sapiens GN=C1R PE=1 SV=2

Match to Query 37105: 1873.850382 from(625.624070,3+) rtinseconds(1725) index(30111)

Title: Locus:1.1.1.3264.10 File:"2013-07-02 CLN FXIII 180 min 3rd F 3.wiff"

Data file C:\Program Files (x86)\Matrix Science\Mascot Daemon\mgf9 FXIII 180 min 3rd\mascot\_daemon\_merge.mgf

Click mouse within plot area to zoom in by factor of two about that point

Or, Plot from 100 to 1700 Da Full range

Label all possible matches  Label matches used for scoring

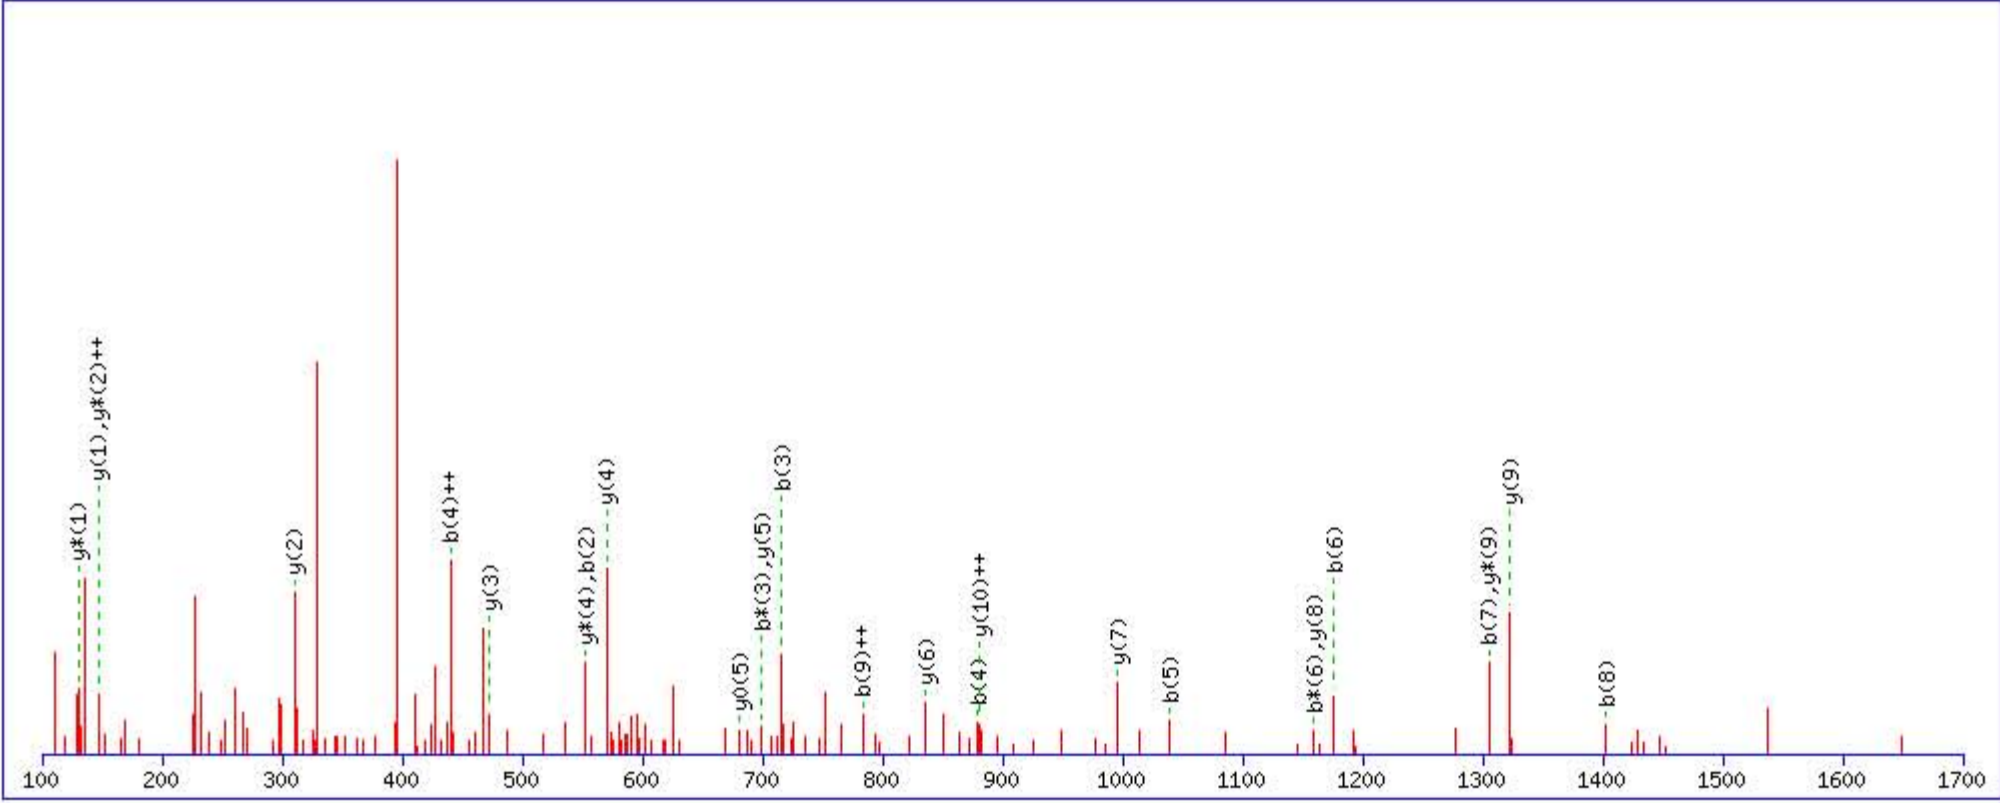

Monoisotopic mass of neutral peptide Mr(calc): 1873.853119

Fixed modifications: Carbamidomethyl (C) (apply to specified residues or termini only)

Variable modifications:

Q2 : Biotin:Thermo-21345 (Q)

Ions Score: 26 Expect: 0.029

Matches : 26/98 fragment ions using 66 most intense peaks ([help](#))

| #  | b                  | b <sup>++</sup>   | b <sup>*</sup>     | b <sup>*++</sup> | b <sup>0</sup> | b <sup>0++</sup> | Seq. | y                  | y <sup>++</sup>   | y <sup>*</sup>     | y <sup>*++</sup>  | y <sup>0</sup>    | y <sup>0++</sup> | #  |
|----|--------------------|-------------------|--------------------|------------------|----------------|------------------|------|--------------------|-------------------|--------------------|-------------------|-------------------|------------------|----|
| 1  | 114.091340         | 57.549308         |                    |                  |                |                  | I    |                    |                   |                    |                   |                   |                  | 11 |
| 2  | <b>553.316666</b>  | 277.161971        | 536.290117         | 268.648697       |                |                  | Q    | 1761.776364        | <b>881.391820</b> | 1744.749815        | 872.878546        | 1743.765799       | 872.386538       | 10 |
| 3  | <b>716.379995</b>  | 358.693636        | <b>699.353446</b>  | 350.180361       |                |                  | Y    | <b>1322.551038</b> | 661.779157        | <b>1305.524489</b> | 653.265883        | 1304.540473       | 652.773875       | 9  |
| 4  | <b>879.443324</b>  | <b>440.225300</b> | 862.416775         | 431.712026       |                |                  | Y    | <b>1159.487709</b> | 580.247493        | 1142.461160        | 571.734218        | 1141.477144       | 571.242210       | 8  |
| 5  | <b>1039.473973</b> | 520.240625        | 1022.447424        | 511.727350       |                |                  | C    | <b>996.424380</b>  | 498.715828        | 979.397831         | 490.202554        | 978.413815        | 489.710546       | 7  |
| 6  | <b>1176.532885</b> | 588.770081        | <b>1159.506336</b> | 580.256806       |                |                  | H    | <b>836.393731</b>  | 418.700504        | 819.367182         | 410.187229        | 818.383166        | 409.695221       | 6  |
| 7  | <b>1305.575478</b> | 653.291377        | 1288.548929        | 644.778103       | 1287.564913    | 644.286094       | E    | <b>699.334819</b>  | 350.171048        | 682.308270         | 341.657773        | <b>681.324254</b> | 341.165765       | 5  |
| 8  | <b>1402.628242</b> | 701.817759        | 1385.601693        | 693.304485       | 1384.617677    | 692.812477       | P    | <b>570.292226</b>  | 285.649751        | <b>553.265677</b>  | 277.136477        |                   |                  | 4  |
| 9  | 1565.691571        | <b>783.349424</b> | 1548.665022        | 774.836149       | 1547.681006    | 774.344141       | Y    | <b>473.239462</b>  | 237.123369        | 456.212913         | 228.610095        |                   |                  | 3  |
| 10 | 1728.754900        | 864.881088        | 1711.728351        | 856.367814       | 1710.744335    | 855.875806       | Y    | <b>310.176133</b>  | 155.591705        | 293.149584         | <b>147.078430</b> |                   |                  | 2  |
| 11 |                    |                   |                    |                  |                |                  | K    | <b>147.112804</b>  | 74.060040         | <b>130.086255</b>  | 65.546765         |                   |                  | 1  |

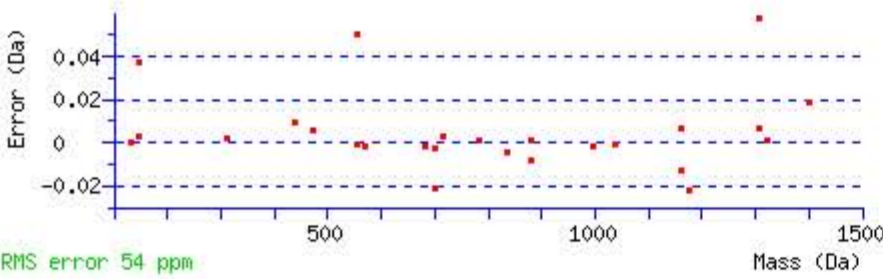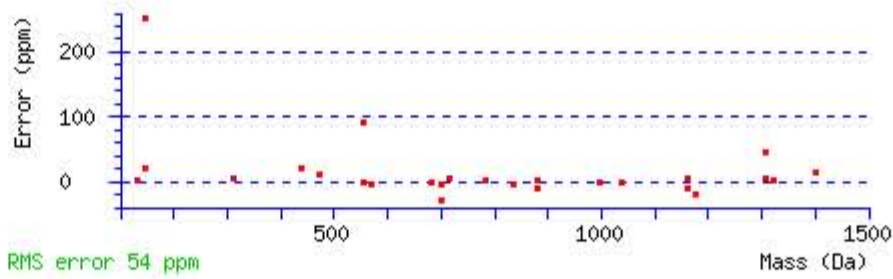

NCBI BLAST search of [IQYYCHEPYK](#)

(Parameters: blastp, nr protein database, expect=20000, no filter, PAM30)

Other BLAST [web gateways](#)

All matches to this query

| Score | Mr(calc):   | Delta     | Sequence                   |
|-------|-------------|-----------|----------------------------|
| 25.7  | 1873.853119 | -0.002737 | <a href="#">IQYYCHEPYK</a> |

**Peptide View**

MS/MS Fragmentation of **QDACQGDSSGGVFAVR**

Found in **C1R\_HUMAN**, Complement C1r subcomponent OS=Homo sapiens GN=C1R PE=1 SV=2

Match to Query 37141: 1876.849182 from(626.623670,3+) rtinseconds(1969) index(31619)

Title: Locus:1.1.1.3349.9 File:"2013-07-02 CLN FXIII 180 min 3rd F 3.wiff"

Data file C:\Program Files (x86)\Matrix Science\Mascot Daemon\mgf9 FXIII 180 min 3rd\mascot\_daemon\_merge.mgf

Click mouse within plot area to zoom in by factor of two about that point

Or, Plot from 100 to 1300 Da Full range

Label all possible matches  Label matches used for scoring

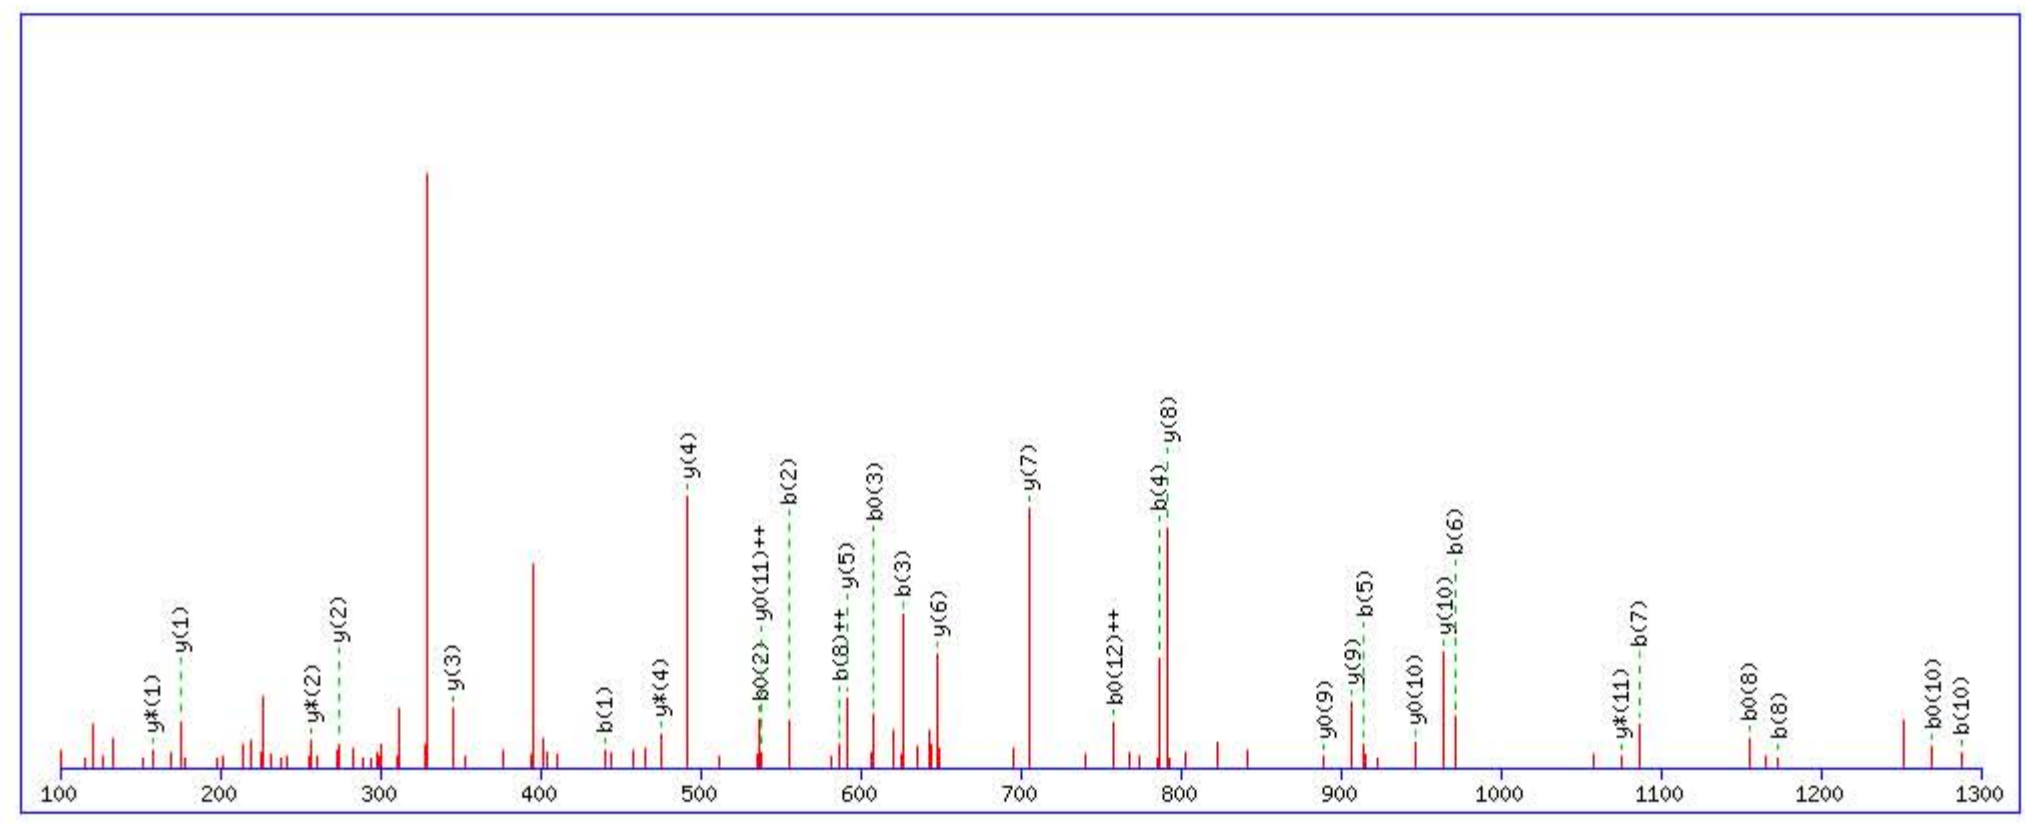

Monoisotopic mass of neutral peptide Mr(calc): 1876.856033

Fixed modifications: Carbamidomethyl (C) (apply to specified residues or termini only)

Variable modifications:

Q1 : Biotin:Thermo-21345 (Q)

Ions Score: 73 Expect: 4.4e-007

Matches : 32/152 fragment ions using 53 most intense peaks (help)

Table with 15 columns: #, b, b++, b+, b\*+, b0, b0++, Seq., y, y++, y+, y\*+, y0, y0++, #. It lists peptide fragments and their corresponding mass values and sequence tags.

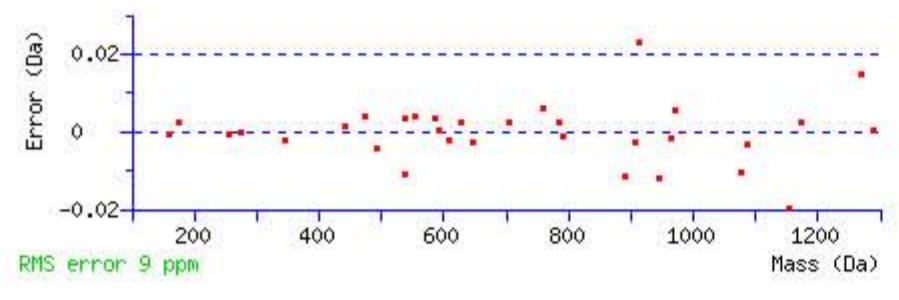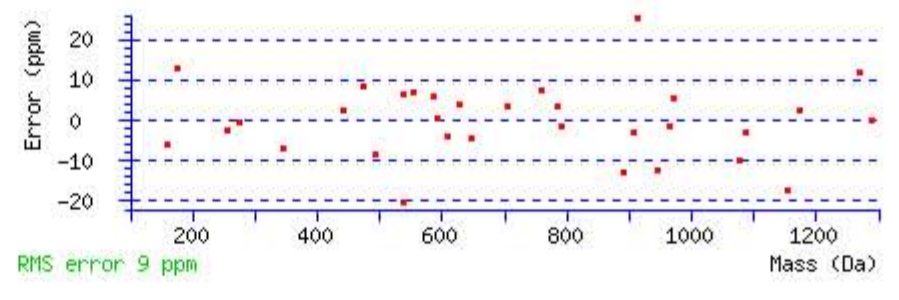

NCBI BLAST search of QDACQGDSSGGVFAVR (Parameters: blastp, nr protein database, expect=20000, no filter, PAM30) Other BLAST web gateways

**All matches to this query**

Table with 4 columns: Score, Mr(calc):, Delta, Sequence. It shows the top matches for the query.

**MATRIX SCIENCE Mascot Search Results**

**Peptide View**

MS/MS Fragmentation of **LPVANPQACENWLR**  
 Found in **C1R\_HUMAN**, Complement C1r subcomponent OS=Homo sapiens GN=C1R PE=1 SV=2

Match to Query 38926: 1977.986112 from(660.335980,3+) rtinseconds(2299) index(33607)  
 Title: Locus:1.1.1.3464.7 File:"2013-07-02 CLN FXIII 180 min 3rd F 3.wiff"  
 Data file C:\Program Files (x86)\Matrix Science\Mascot Daemon\mgf\9 FXIII 180 min 3rd\mascot\_daemon\_merge.mgf

Click mouse within plot area to zoom in by factor of two about that point  
 Or, Plot from  to  Da   
 Label all possible matches  Label matches used for scoring

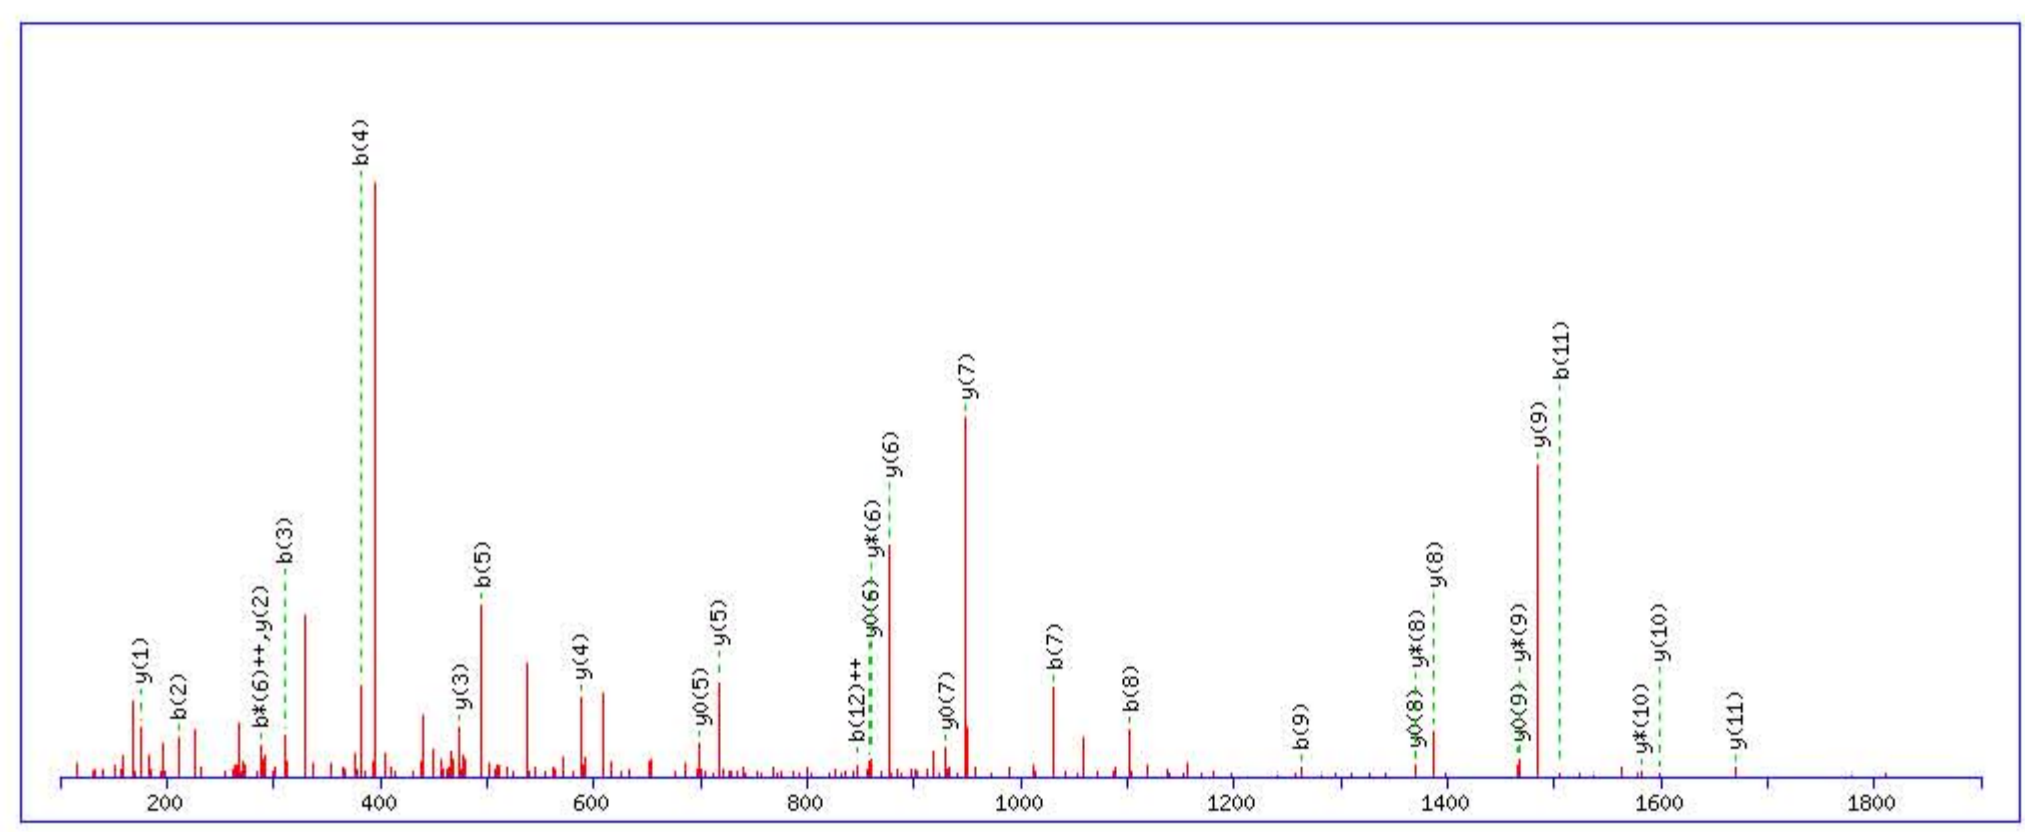

Monoisotopic mass of neutral peptide Mr(calc): 1977.991684  
 Fixed modifications: Carbamidomethyl (C) (apply to specified residues or termini only)  
 Variable modifications:  
 Q7 : Biotin:Thermo-21345 (Q)  
 Ions Score: 53 Expect: 0.0001  
 Matches : 30/122 fragment ions using 63 most intense peaks [\(help\)](#)

| #  | b                  | b <sup>++</sup>   | b <sup>+</sup> | b <sup>+++</sup>  | b <sup>0</sup> | b <sup>0++</sup> | Seq. | y                  | y <sup>++</sup> | y <sup>+</sup>     | y <sup>+++</sup> | y <sup>0</sup>     | y <sup>0++</sup> | #  |
|----|--------------------|-------------------|----------------|-------------------|----------------|------------------|------|--------------------|-----------------|--------------------|------------------|--------------------|------------------|----|
| 1  | 114.091340         | 57.549308         |                |                   |                |                  | L    |                    |                 |                    |                  |                    |                  | 14 |
| 2  | <b>211.144104</b>  | 106.075690        |                |                   |                |                  | P    | 1865.914921        | 933.461099      | 1848.888372        | 924.947824       | 1847.904356        | 924.455816       | 13 |
| 3  | <b>310.212518</b>  | 155.609897        |                |                   |                |                  | V    | 1768.862157        | 884.934717      | 1751.835608        | 876.421442       | 1750.851592        | 875.929434       | 12 |
| 4  | <b>381.249632</b>  | 191.128454        |                |                   |                |                  | A    | <b>1669.793743</b> | 835.400510      | 1652.767194        | 826.887235       | 1651.783178        | 826.395227       | 11 |
| 5  | <b>495.292559</b>  | 248.149917        | 478.266010     | 239.636643        |                |                  | N    | <b>1598.756629</b> | 799.881953      | <b>1581.730080</b> | 791.368678       | 1580.746064        | 790.876670       | 10 |
| 6  | 592.345323         | 296.676300        | 575.318774     | <b>288.163025</b> |                |                  | P    | <b>1484.713702</b> | 742.860489      | <b>1467.687153</b> | 734.347215       | <b>1466.703137</b> | 733.855207       | 9  |
| 7  | <b>1031.570649</b> | 516.288963        | 1014.544100    | 507.775688        |                |                  | Q    | <b>1387.660938</b> | 694.334107      | <b>1370.634389</b> | 685.820833       | <b>1369.650373</b> | 685.328825       | 8  |
| 8  | <b>1102.607763</b> | 551.807520        | 1085.581214    | 543.294245        |                |                  | A    | <b>948.435612</b>  | 474.721444      | 931.409063         | 466.208170       | <b>930.425047</b>  | 465.716162       | 7  |
| 9  | <b>1262.638412</b> | 631.822844        | 1245.611863    | 623.309570        |                |                  | C    | <b>877.398498</b>  | 439.202887      | <b>860.371949</b>  | 430.689613       | <b>859.387933</b>  | 430.197605       | 6  |
| 10 | 1391.681005        | 696.344141        | 1374.654456    | 687.830866        | 1373.670440    | 687.338858       | E    | <b>717.367849</b>  | 359.187563      | 700.341300         | 350.674288       | <b>699.357284</b>  | 350.182280       | 5  |
| 11 | <b>1505.723932</b> | 753.365604        | 1488.697383    | 744.852330        | 1487.713367    | 744.360322       | N    | <b>588.325256</b>  | 294.666266      | 571.298707         | 286.152991       |                    |                  | 4  |
| 12 | 1691.803245        | <b>846.405261</b> | 1674.776696    | 837.891986        | 1673.792680    | 837.399978       | W    | <b>474.282329</b>  | 237.644802      | 457.255780         | 229.131528       |                    |                  | 3  |
| 13 | 1804.887309        | 902.947293        | 1787.860760    | 894.434018        | 1786.876744    | 893.942010       | L    | <b>288.203016</b>  | 144.605146      | 271.176467         | 136.091871       |                    |                  | 2  |
| 14 |                    |                   |                |                   |                |                  | R    | <b>175.118952</b>  | 88.063114       | 158.092403         | 79.549839        |                    |                  | 1  |

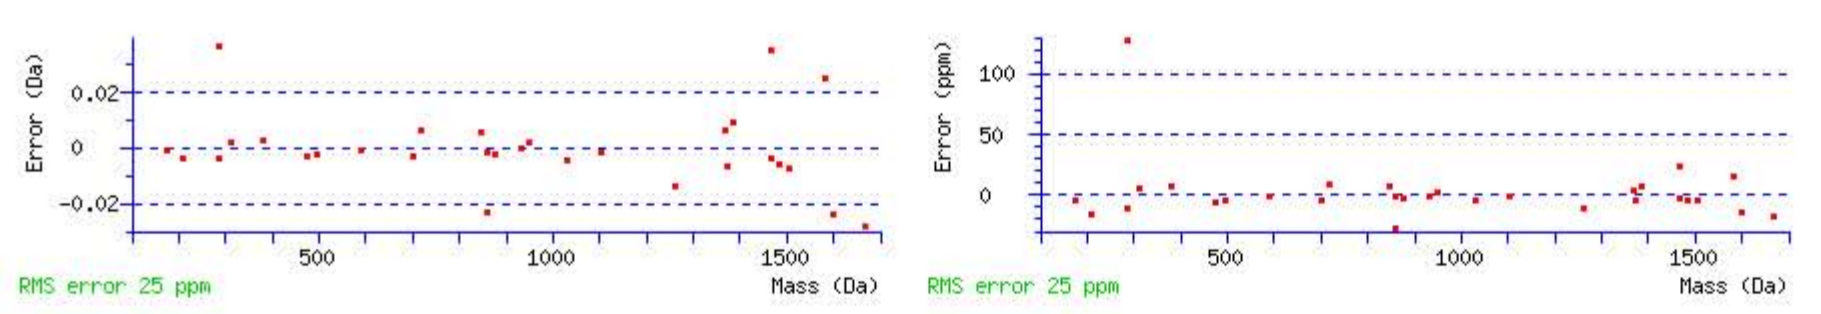

NCBI BLAST search of **LPVANPQACENWLR**  
 (Parameters: blastp, nr protein database, expect=20000, no filter, PAM30)  
 Other BLAST [web gateways](#)

**All matches to this query**

| Score | Mr(calc):   | Delta     | Sequence                         |
|-------|-------------|-----------|----------------------------------|
| 52.7  | 1977.991684 | -0.005572 | <a href="#">LPVANPQACENWLR</a>   |
| 10.0  | 1977.983856 | 0.002256  | <a href="#">VLGKGGFGEVSACQMK</a> |



# MASCOT Search Results

## Peptide View

MS/MS Fragmentation of **MGNFPWQVFTNIHGR**  
Found in **C1R\_HUMAN**, Complement C1r subcomponent OS=Homo sapiens GN=C1R PE=1 SV=2

Match to Query 41797: 2114.043912 from(705.688580,3+) rtinseconds(2684) index(49929)  
Title: Locus:1.1.1.3646.11 File:"2013-07-02 CLN FXIII 180 min 3rd F 4.wiff"  
Data file C:\Program Files (x86)\Matrix Science\Mascot Daemon\mgf\9 FXIII 180 min 3rd\mascot\_daemon\_merge.mgf

Click mouse within plot area to zoom in by factor of two about that point

Or, Plot from  to  Da

Label all possible matches  Label matches used for scoring

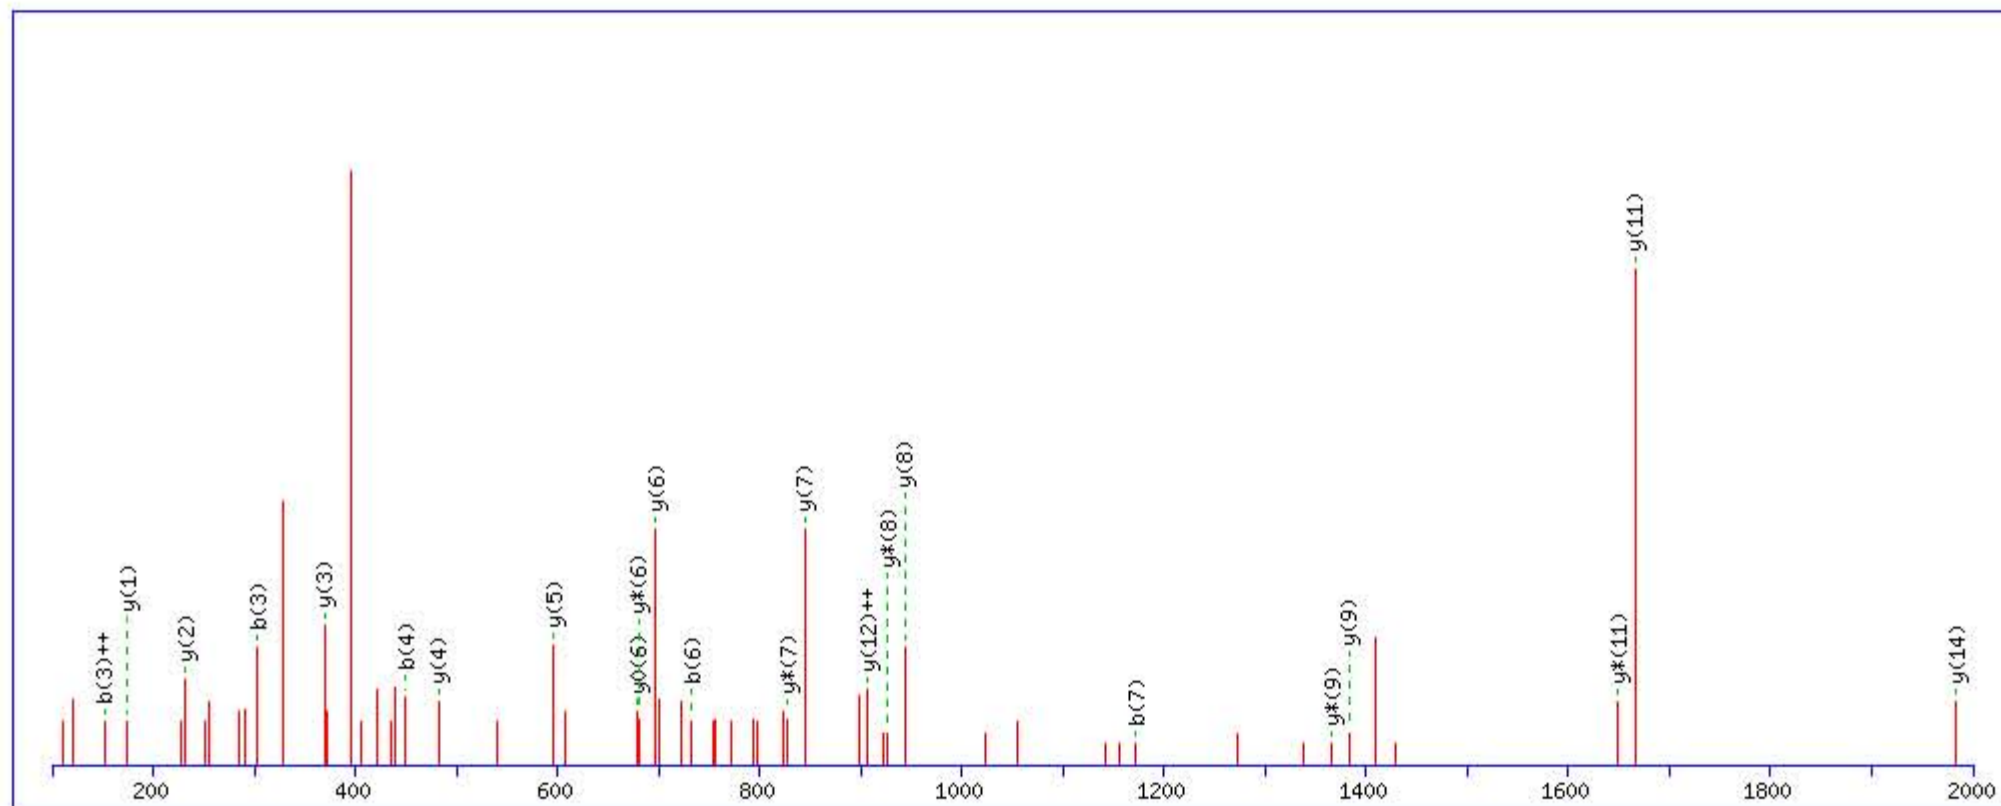

Monoisotopic mass of neutral peptide Mr(calc): 2114.034256  
Fixed modifications: Carbamidomethyl (C) (apply to specified residues or termini only)  
Variable modifications:  
Q7 : Biotin:Thermo-21345 (Q)  
Ions Score: 46 Expect: 0.00063  
Matches : 23/136 fragment ions using 56 most intense peaks [\(help\)](#)

| #  | b                  | b <sup>++</sup>   | b <sup>+</sup> | b <sup>*++</sup> | b <sup>0</sup> | b <sup>0++</sup> | Seq. | y                  | y <sup>++</sup>   | y <sup>+</sup>     | y <sup>*++</sup> | y <sup>0</sup>    | y <sup>0++</sup> | #  |
|----|--------------------|-------------------|----------------|------------------|----------------|------------------|------|--------------------|-------------------|--------------------|------------------|-------------------|------------------|----|
| 1  | 132.047761         | 66.527518         |                |                  |                |                  | M    |                    |                   |                    |                  |                   |                  | 15 |
| 2  | 189.069225         | 95.038250         |                |                  |                |                  | G    | <b>1984.001034</b> | 992.504155        | 1966.974485        | 983.990881       | 1965.990469       | 983.498873       | 14 |
| 3  | <b>303.112152</b>  | <b>152.059714</b> | 286.085603     | 143.546439       |                |                  | N    | 1926.979570        | 963.993423        | 1909.953021        | 955.480149       | 1908.969005       | 954.988141       | 13 |
| 4  | <b>450.180566</b>  | 225.593921        | 433.154017     | 217.080646       |                |                  | F    | 1812.936643        | <b>906.971960</b> | 1795.910094        | 898.458685       | 1794.926078       | 897.966677       | 12 |
| 5  | 547.233330         | 274.120303        | 530.206781     | 265.607029       |                |                  | P    | <b>1665.868229</b> | 833.437753        | <b>1648.841680</b> | 824.924478       | 1647.857664       | 824.432470       | 11 |
| 6  | <b>733.312643</b>  | 367.159960        | 716.286094     | 358.646685       |                |                  | W    | 1568.815465        | 784.911371        | 1551.788916        | 776.398096       | 1550.804900       | 775.906088       | 10 |
| 7  | <b>1172.537969</b> | 586.772623        | 1155.511420    | 578.259348       |                |                  | Q    | <b>1382.736152</b> | 691.871714        | <b>1365.709603</b> | 683.358440       | 1364.725587       | 682.866432       | 9  |
| 8  | 1271.606383        | 636.306830        | 1254.579834    | 627.793555       |                |                  | V    | <b>943.510826</b>  | 472.259051        | <b>926.484277</b>  | 463.745777       | 925.500261        | 463.253769       | 8  |
| 9  | 1418.674797        | 709.841037        | 1401.648248    | 701.327762       |                |                  | F    | <b>844.442412</b>  | 422.724844        | <b>827.415863</b>  | 414.211570       | 826.431847        | 413.719562       | 7  |
| 10 | 1519.722476        | 760.364876        | 1502.695927    | 751.851602       | 1501.711911    | 751.359594       | T    | <b>697.373998</b>  | 349.190637        | <b>680.347449</b>  | 340.677363       | <b>679.363433</b> | 340.185355       | 6  |
| 11 | 1633.765403        | 817.386340        | 1616.738854    | 808.873065       | 1615.754838    | 808.381057       | N    | <b>596.326319</b>  | 298.666798        | 579.299770         | 290.153523       |                   |                  | 5  |
| 12 | 1746.849467        | 873.928372        | 1729.822918    | 865.415097       | 1728.838902    | 864.923089       | I    | <b>482.283392</b>  | 241.645334        | 465.256843         | 233.132059       |                   |                  | 4  |
| 13 | 1883.908379        | 942.457828        | 1866.881830    | 933.944553       | 1865.897814    | 933.452545       | H    | <b>369.199328</b>  | 185.103302        | 352.172779         | 176.590028       |                   |                  | 3  |
| 14 | 1940.929843        | 970.968559        | 1923.903294    | 962.455285       | 1922.919278    | 961.963277       | G    | <b>232.140416</b>  | 116.573846        | 215.113867         | 108.060572       |                   |                  | 2  |
| 15 |                    |                   |                |                  |                |                  | R    | <b>175.118952</b>  | 88.063114         | 158.092403         | 79.549840        |                   |                  | 1  |

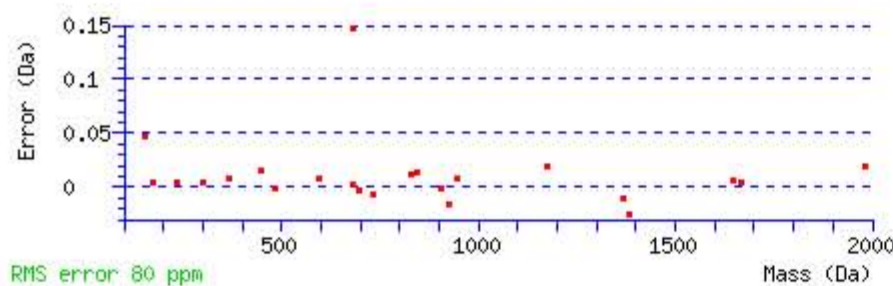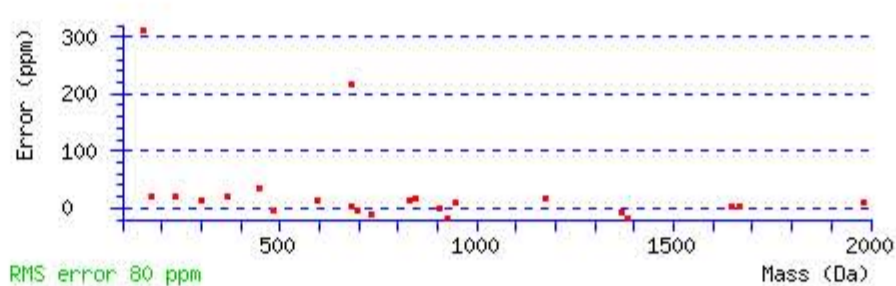

NCBI BLAST search of **MGNFPWQVFTNIHGR**  
(Parameters: blastp, nr protein database, expect=20000, no filter, PAM30)  
Other BLAST [web gateways](#)

## All matches to this query

| Score | Mr(calc):   | Delta    | Sequence                        |
|-------|-------------|----------|---------------------------------|
| 46.1  | 2114.034256 | 0.009656 | <a href="#">MGNFPWQVFTNIHGR</a> |



# MASCOT Search Results

## Peptide View

MS/MS Fragmentation of **MDVFSQNMFCAGHPSLK**

Found in **C1R\_HUMAN**, Complement C1r subcomponent OS=Homo sapiens GN=C1R PE=1 SV=2

Match to Query 44709: 2279.034012 from(760.685280,3+) rtinseconds(2379) index(33962)

Title: Locus:1.1.1.3492.6 File:"2013-07-02 CLN FXIII 180 min 3rd F 3.wiff"

Data file C:\Program Files (x86)\Matrix Science\Mascot Daemon\mgf9 FXIII 180 min 3rd\mascot\_daemon\_merge.mgf

Click mouse within plot area to zoom in by factor of two about that point

Or, Plot from  to  Da

Label all possible matches  Label matches used for scoring

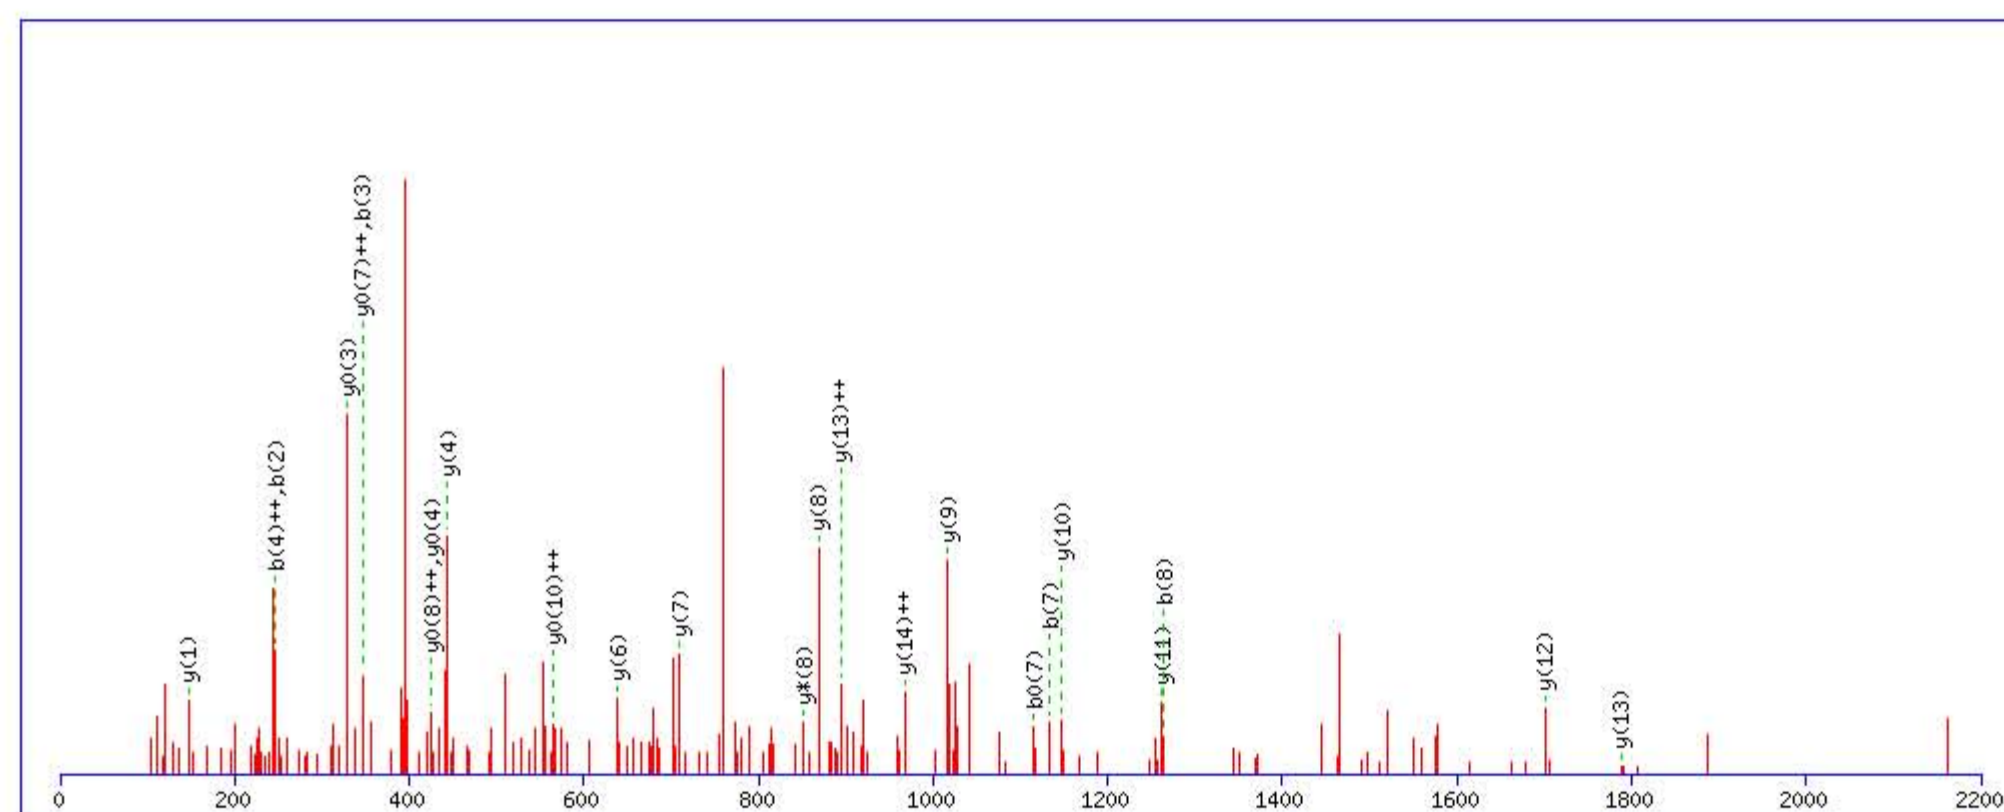

Monoisotopic mass of neutral peptide Mr(calc): 2279.035965

Fixed modifications: Carbamidomethyl (C) (apply to specified residues or termini only)

Variable modifications:

Q6 : Biotin:Thermo-21345 (Q)

Ions Score: 37 Expect: 0.0006

Matches : 24/176 fragment ions using 54 most intense peaks [\(help\)](#)

| #  | b                  | b <sup>++</sup>   | b <sup>*</sup> | b <sup>***</sup> | b <sup>0</sup>     | b <sup>0++</sup> | Seq.     | y                  | y <sup>++</sup>   | y <sup>*</sup>    | y <sup>***</sup> | y <sup>0</sup>    | y <sup>0++</sup>  | #  |
|----|--------------------|-------------------|----------------|------------------|--------------------|------------------|----------|--------------------|-------------------|-------------------|------------------|-------------------|-------------------|----|
| 1  | 132.047761         | 66.527518         |                |                  |                    |                  | <b>M</b> |                    |                   |                   |                  |                   |                   | 17 |
| 2  | <b>247.074704</b>  | 124.040990        |                |                  | 229.064139         | 115.035708       | <b>D</b> | 2149.002750        | 1075.005013       | 2131.976201       | 1066.491738      | 2130.992185       | 1065.999730       | 16 |
| 3  | <b>346.143118</b>  | 173.575197        |                |                  | 328.132553         | 164.569915       | <b>V</b> | 2033.975807        | 1017.491542       | 2016.949258       | 1008.978267      | 2015.965242       | 1008.486259       | 15 |
| 4  | 493.211532         | <b>247.109404</b> |                |                  | 475.200967         | 238.104121       | <b>F</b> | 1934.907393        | <b>967.957335</b> | 1917.880844       | 959.444060       | 1916.896828       | 958.952052        | 14 |
| 5  | 580.243560         | 290.625418        |                |                  | 562.232995         | 281.620136       | <b>S</b> | <b>1787.838979</b> | <b>894.423128</b> | 1770.812430       | 885.909853       | 1769.828414       | 885.417845        | 13 |
| 6  | 1019.468886        | 510.238081        | 1002.442337    | 501.724807       | 1001.458321        | 501.232799       | <b>Q</b> | <b>1700.806951</b> | 850.907114        | 1683.780402       | 842.393839       | 1682.796386       | 841.901831        | 12 |
| 7  | <b>1133.511813</b> | 567.259545        | 1116.485264    | 558.746270       | <b>1115.501248</b> | 558.254262       | <b>N</b> | <b>1261.581625</b> | 631.294451        | 1244.555076       | 622.781176       | 1243.571060       | 622.289168        | 11 |
| 8  | <b>1264.552298</b> | 632.779787        | 1247.525749    | 624.266513       | 1246.541733        | 623.774505       | <b>M</b> | <b>1147.538698</b> | 574.272987        | 1130.512149       | 565.759713       | 1129.528133       | <b>565.267705</b> | 10 |
| 9  | 1411.620712        | 706.313994        | 1394.594163    | 697.800720       | 1393.610147        | 697.308712       | <b>F</b> | <b>1016.498213</b> | 508.752745        | 999.471664        | 500.239470       | 998.487648        | 499.747462        | 9  |
| 10 | 1571.651361        | 786.329319        | 1554.624812    | 777.816044       | 1553.640796        | 777.324036       | <b>C</b> | <b>869.429799</b>  | 435.218538        | <b>852.403250</b> | 426.705263       | 851.419234        | <b>426.213255</b> | 8  |
| 11 | 1642.688475        | 821.847876        | 1625.661926    | 813.334601       | 1624.677910        | 812.842593       | <b>A</b> | <b>709.399150</b>  | 355.203213        | 692.372601        | 346.689939       | 691.388585        | <b>346.197931</b> | 7  |
| 12 | 1699.709939        | 850.358608        | 1682.683390    | 841.845333       | 1681.699374        | 841.353325       | <b>G</b> | <b>638.362036</b>  | 319.684656        | 621.335487        | 311.171382       | 620.351471        | 310.679374        | 6  |
| 13 | 1836.768851        | 918.888064        | 1819.742302    | 910.374789       | 1818.758286        | 909.882781       | <b>H</b> | 581.340572         | 291.173924        | 564.314023        | 282.660650       | 563.330007        | 282.168642        | 5  |
| 14 | 1933.821615        | 967.414446        | 1916.795066    | 958.901171       | 1915.811050        | 958.409163       | <b>P</b> | <b>444.281660</b>  | 222.644468        | 427.255111        | 214.131194       | <b>426.271095</b> | 213.639186        | 4  |
| 15 | 2020.853643        | 1010.930460       | 2003.827094    | 1002.417185      | 2002.843078        | 1001.925177      | <b>S</b> | 347.228896         | 174.118086        | 330.202347        | 165.604812       | <b>329.218331</b> | 165.112804        | 3  |
| 16 | 2133.937707        | 1067.472491       | 2116.911158    | 1058.959217      | 2115.927142        | 1058.467209      | <b>L</b> | 260.196868         | 130.602072        | 243.170319        | 122.088798       |                   |                   | 2  |
| 17 |                    |                   |                |                  |                    |                  | <b>K</b> | <b>147.112804</b>  | 74.060040         | 130.086255        | 65.546765        |                   |                   | 1  |

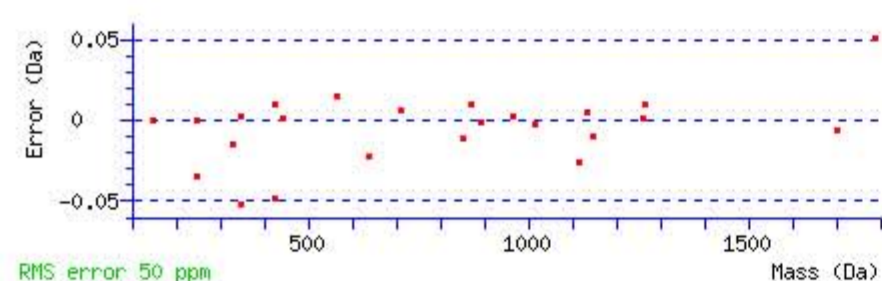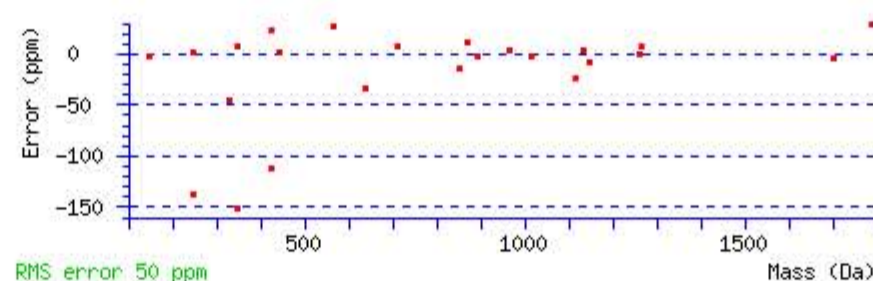

NCBI BLAST search of **MDVFSQNMFCAGHPSLK**

(Parameters: blastp, nr protein database, expect=20000, no filter, PAM30)

Other BLAST [web gateways](#)

## All matches to this query

| Score | Mr(calc):   | Delta     | Sequence                             |
|-------|-------------|-----------|--------------------------------------|
| 36.7  | 2279.035965 | -0.001953 | <a href="#">MDVFSQNMFCAGHPSLK</a>    |
| 2.3   | 2279.029694 | 0.004318  | <a href="#">DMLMEGTEEVEAELPDSRTK</a> |



**MASCOT** **SCIENCE** Mascot Search Results

Peptide View

MS/MS Fragmentation of **EACNAWLQK**

Found in **C1RL\_HUMAN**, Complement C1r subcomponent-like protein OS=Homo sapiens GN=C1RL PE=1 SV=2

Match to Query 25283: 1429.684808 from(715.849680,2+) rtinseconds(1973) index(60451)

Title: Locus:1.1.1.1598.21 File:"2013-07-02 CLN FXIII 180 min 3rd FT.wiff"

Data file C:\Program Files (x86)\Matrix Science\Mascot Daemon\mgf9 FXIII 180 min 3rd\mascot\_daemon\_merge.mgf

Click mouse within plot area to zoom in by factor of two about that point

Or, Plot from  to  Da

Label all possible matches  Label matches used for scoring

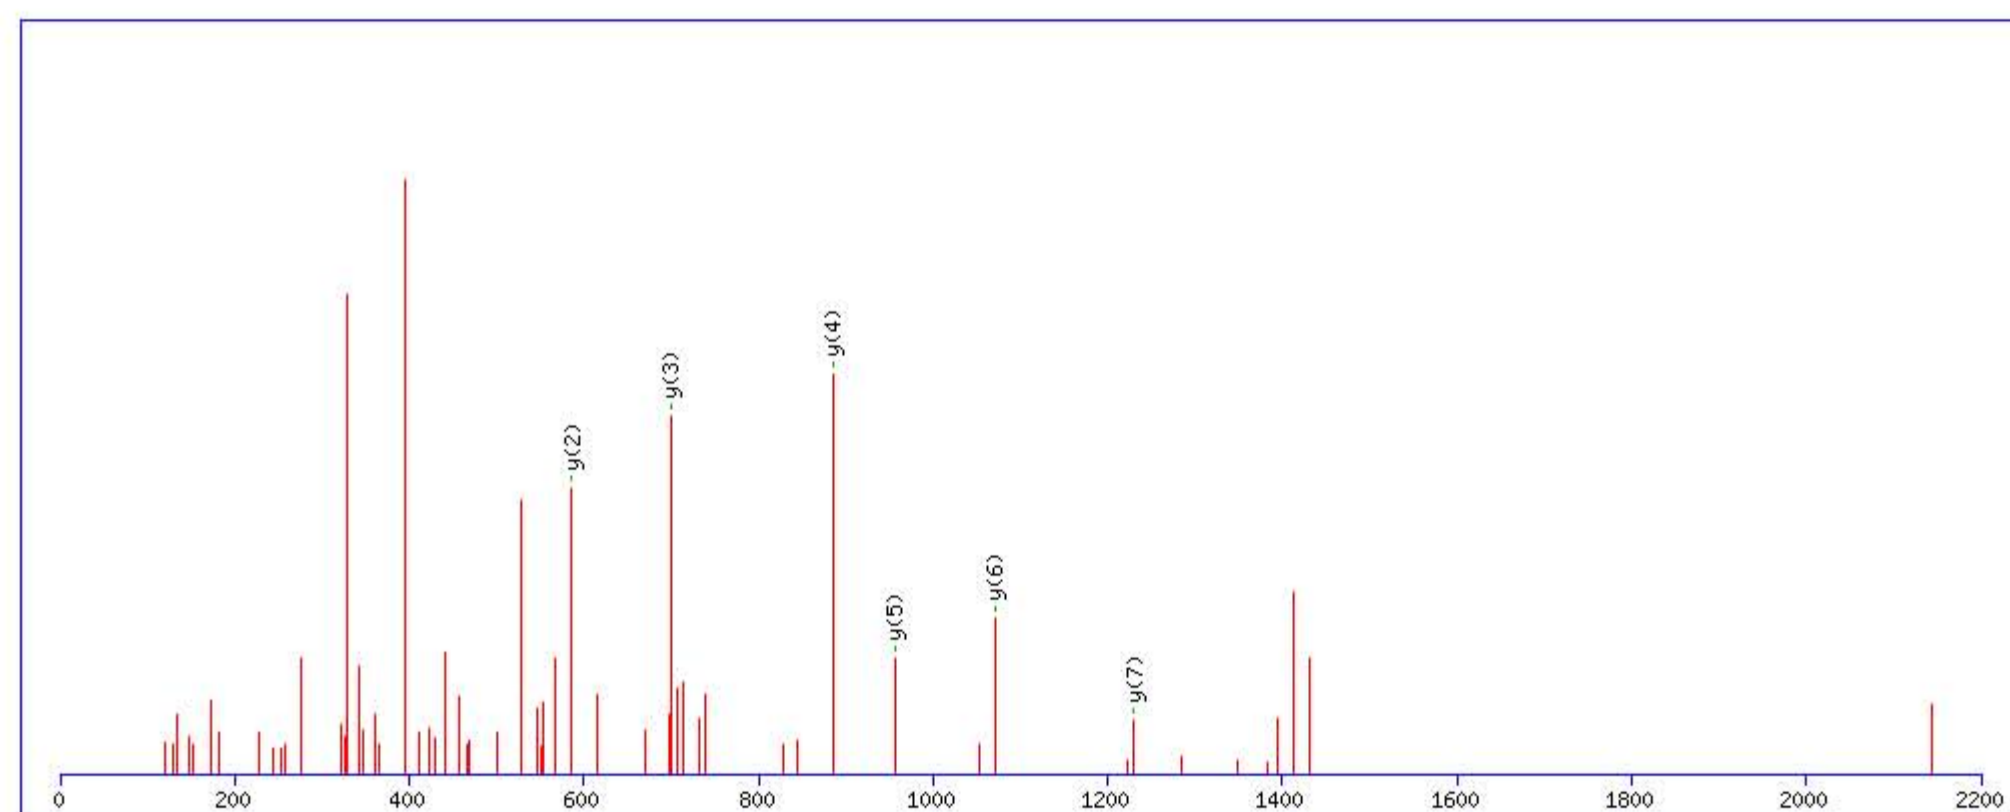

Monoisotopic mass of neutral peptide Mr(calc): 1429.684601

Fixed modifications: Carbamidomethyl (C) (apply to specified residues or termini only)

Variable modifications:

Q8 : Biotin:Thermo-21345 (Q)

Ions Score: 38 Expect: 0.003

Matches : 6/74 fragment ions using 12 most intense peaks [\(help\)](#)

| # | b           | b <sup>++</sup> | b <sup>*</sup> | b <sup>***</sup> | b <sup>0</sup> | b <sup>0++</sup> | Seq. | y                  | y <sup>++</sup> | y <sup>*</sup> | y <sup>***</sup> | # |
|---|-------------|-----------------|----------------|------------------|----------------|------------------|------|--------------------|-----------------|----------------|------------------|---|
| 1 | 130.049869  | 65.528572       |                |                  | 112.039304     | 56.523290        | E    |                    |                 |                |                  | 9 |
| 2 | 201.086983  | 101.047130      |                |                  | 183.076418     | 92.041847        | A    | 1301.649311        | 651.328293      | 1284.622762    | 642.815019       | 8 |
| 3 | 361.117632  | 181.062454      |                |                  | 343.107067     | 172.057172       | C    | <b>1230.612197</b> | 615.809736      | 1213.585648    | 607.296462       | 7 |
| 4 | 475.160559  | 238.083918      | 458.134010     | 229.570643       | 457.149994     | 229.078635       | N    | <b>1070.581548</b> | 535.794412      | 1053.554999    | 527.281138       | 6 |
| 5 | 546.197673  | 273.602475      | 529.171124     | 265.089200       | 528.187108     | 264.597192       | A    | <b>956.538621</b>  | 478.772948      | 939.512072     | 470.259674       | 5 |
| 6 | 732.276986  | 366.642131      | 715.250437     | 358.128857       | 714.266421     | 357.636849       | W    | <b>885.501507</b>  | 443.254392      | 868.474958     | 434.741117       | 4 |
| 7 | 845.361050  | 423.184163      | 828.334501     | 414.670889       | 827.350485     | 414.178881       | L    | <b>699.422194</b>  | 350.214735      | 682.395645     | 341.701461       | 3 |
| 8 | 1284.586376 | 642.796826      | 1267.559827    | 634.283552       | 1266.575811    | 633.791543       | Q    | <b>586.338130</b>  | 293.672703      | 569.311581     | 285.159428       | 2 |
| 9 |             |                 |                |                  |                |                  | K    | 147.112804         | 74.060040       | 130.086255     | 65.546765        | 1 |

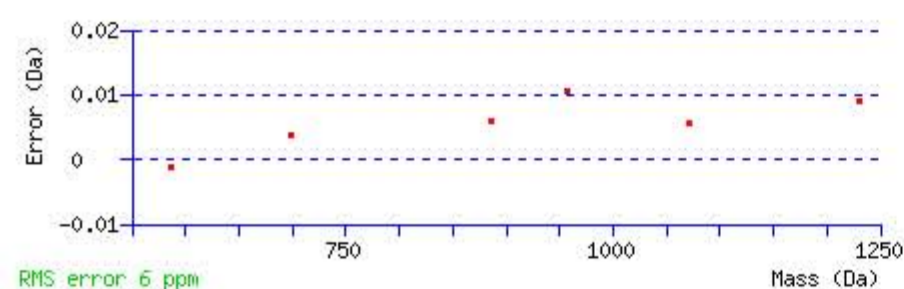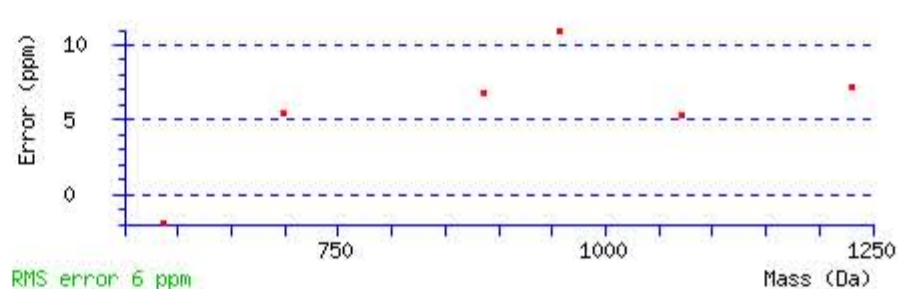

NCBI BLAST search of [EACNAWLQK](#)

(Parameters: blastp, nr protein database, expect=20000, no filter, PAM30)

Other BLAST [web gateways](#)

All matches to this query

| Score | Mr(calc):   | Delta     | Sequence                      |
|-------|-------------|-----------|-------------------------------|
| 38.0  | 1429.684601 | 0.000207  | <a href="#">EACNAWLQK</a>     |
| 14.6  | 1429.680588 | 0.004220  | <a href="#">MRIHCLENVDK</a>   |
| 13.6  | 1429.687988 | -0.003180 | <a href="#">CNTPAMGLQK</a>    |
| 9.4   | 1429.679886 | 0.004922  | <a href="#">MDDKELIEYFK</a>   |
| 8.5   | 1429.666016 | 0.018792  | <a href="#">NHGGYVDVMPVVK</a> |
| 7.9   | 1429.702362 | -0.017554 | <a href="#">LSNWESQVK</a>     |
| 7.6   | 1429.687103 | -0.002295 | <a href="#">QSEADNNTLK</a>    |
| 6.8   | 1429.687119 | -0.002311 | <a href="#">EQHQTMDSLTK</a>   |
| 6.5   | 1429.705734 | -0.020926 | <a href="#">QEMNTLQVK</a>     |
| 6.5   | 1429.705719 | -0.020911 | <a href="#">EANALAMQVK</a>    |

# MASCOT SCIENCE Mascot Search Results

## Peptide View

MS/MS Fragmentation of **TMQENSTPR**

Found in **C1S\_HUMAN**, Complement C1s subcomponent OS=Homo sapiens GN=C1S PE=1 SV=1

Match to Query 22757: 1373.637288 from(687.825920,2+) rtinseconds(1403) index(28254)

Title: Locus:1.1.1.3151.24 File:"2013-07-02 CLN FXIII 180 min 3rd F 3.wiff"

Data file C:\Program Files (x86)\Matrix Science\Mascot Daemon\mgf\9 FXIII 180 min 3rd\mascot\_daemon\_merge.mgf

Click mouse within plot area to zoom in by factor of two about that point

Or, Plot from  to  Da

Label all possible matches  Label matches used for scoring

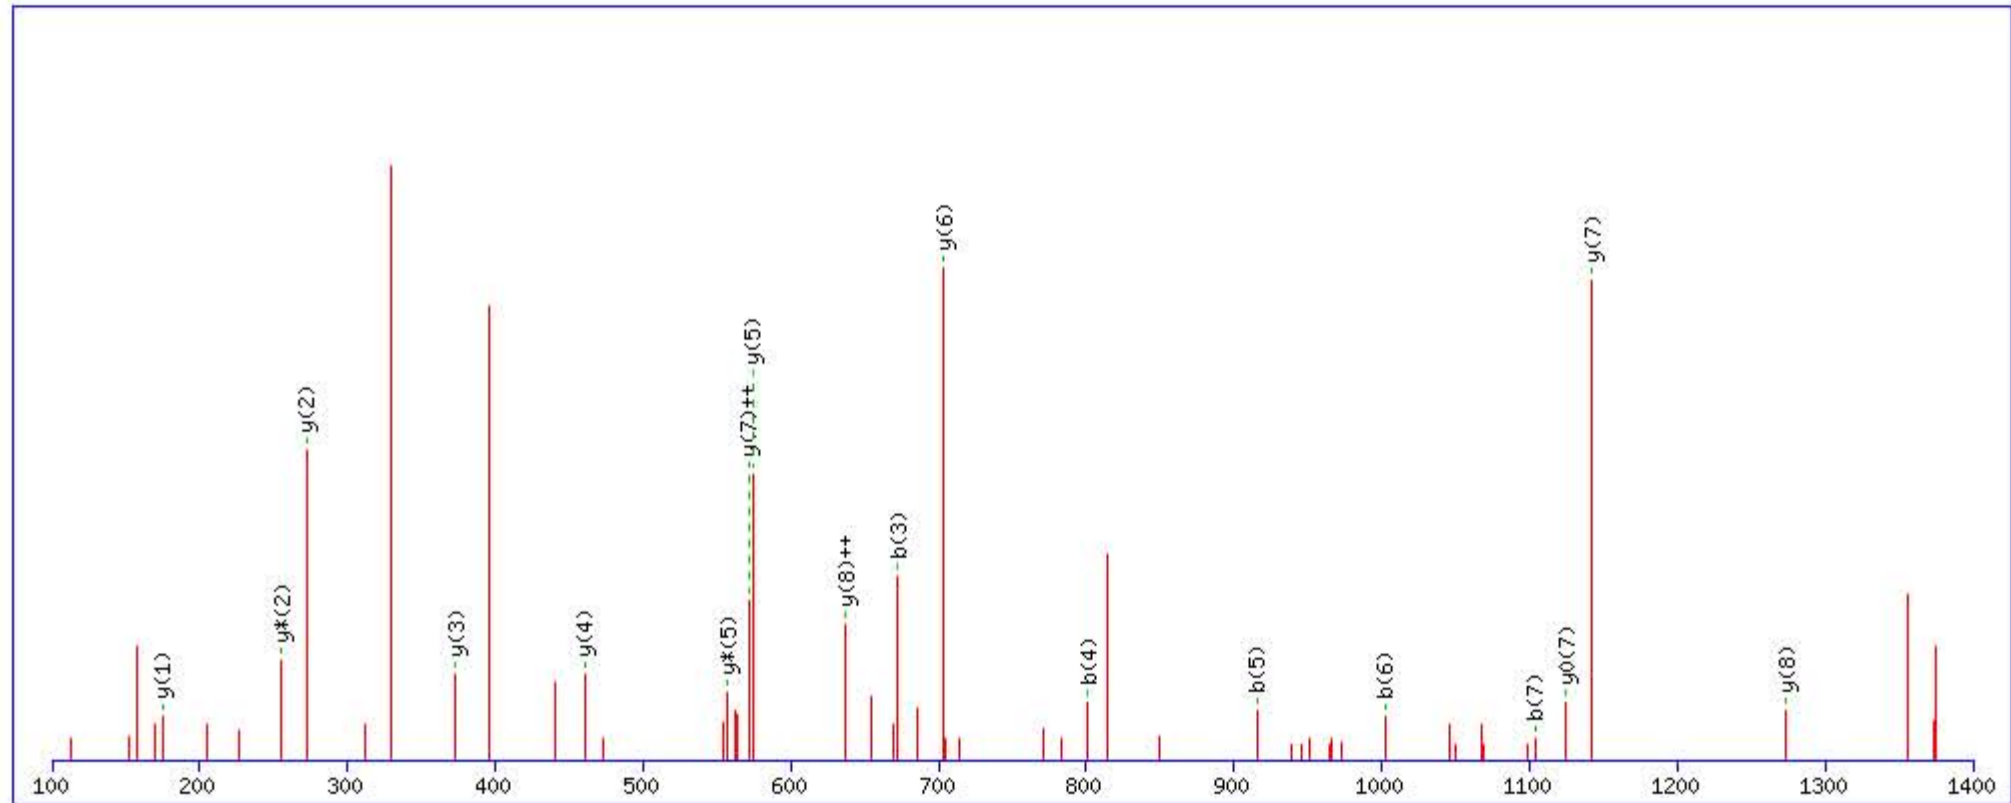

Monoisotopic mass of neutral peptide Mr(calc): 1373.643143

Fixed modifications: Carbamidomethyl (C) (apply to specified residues or termini only)

Variable modifications:

Q3 : Biotin:Thermo-21345 (Q)

Ions Score: 51 Expect: 7.8e-005

Matches : 18/88 fragment ions using 33 most intense peaks ([help](#))

| # | b           | b <sup>++</sup> | b <sup>*</sup> | b <sup>+++</sup> | b <sup>0</sup> | b <sup>0++</sup> | Seq. | y           | y <sup>++</sup> | y <sup>*</sup> | y <sup>+++</sup> | y <sup>0</sup> | y <sup>0++</sup> | # |
|---|-------------|-----------------|----------------|------------------|----------------|------------------|------|-------------|-----------------|----------------|------------------|----------------|------------------|---|
| 1 | 102.054955  | 51.531116       |                |                  | 84.044390      | 42.525833        | T    |             |                 |                |                  |                |                  | 9 |
| 2 | 233.095440  | 117.051358      |                |                  | 215.084875     | 108.046076       | M    | 1273.602754 | 637.305015      | 1256.576205    | 628.791741       | 1255.592189    | 628.299733       | 8 |
| 3 | 672.320766  | 336.664021      | 655.294217     | 328.150747       | 654.310201     | 327.658739       | Q    | 1142.562269 | 571.784773      | 1125.535720    | 563.271498       | 1124.551704    | 562.779490       | 7 |
| 4 | 801.363359  | 401.185318      | 784.336810     | 392.672043       | 783.352794     | 392.180035       | E    | 703.336943  | 352.172110      | 686.310394     | 343.658835       | 685.326378     | 343.166827       | 6 |
| 5 | 915.406286  | 458.206781      | 898.379737     | 449.693507       | 897.395721     | 449.201499       | N    | 574.294350  | 287.650813      | 557.267801     | 279.137539       | 556.283785     | 278.645531       | 5 |
| 6 | 1002.438314 | 501.722795      | 985.411765     | 493.209521       | 984.427749     | 492.717513       | S    | 460.251423  | 230.629349      | 443.224874     | 222.116075       | 442.240858     | 221.624067       | 4 |
| 7 | 1103.485993 | 552.246635      | 1086.459444    | 543.733360       | 1085.475428    | 543.241352       | T    | 373.219395  | 187.113335      | 356.192846     | 178.600061       | 355.208830     | 178.108053       | 3 |
| 8 | 1200.538757 | 600.773017      | 1183.512208    | 592.259742       | 1182.528192    | 591.767734       | P    | 272.171716  | 136.589496      | 255.145167     | 128.076221       |                |                  | 2 |
| 9 |             |                 |                |                  |                |                  | R    | 175.118952  | 88.063114       | 158.092403     | 79.549839        |                |                  | 1 |

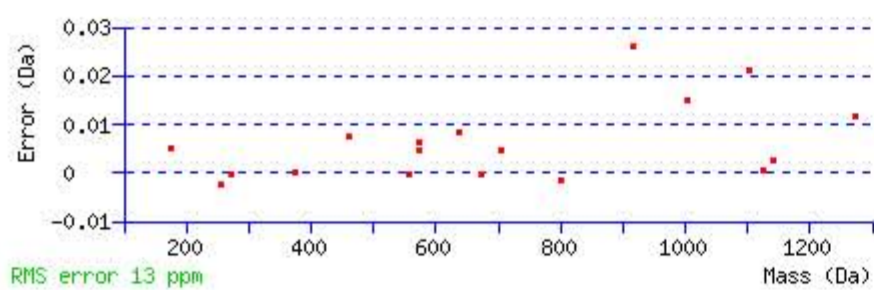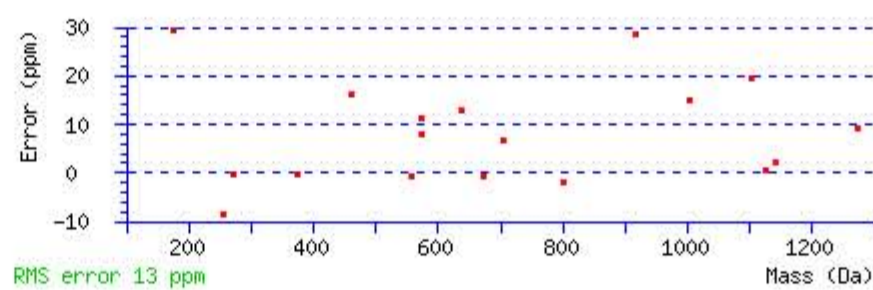

NCBI BLAST search of [TMQENSTPR](#)

(Parameters: blastp, nr protein database, expect=20000, no filter, PAM30)

Other BLAST [web gateways](#)

All matches to this query

| Score | Mr(calc):   | Delta     | Sequence                     |
|-------|-------------|-----------|------------------------------|
| 51.3  | 1373.643143 | -0.005855 | <a href="#">TMQENSTPR</a>    |
| 11.8  | 1373.635742 | 0.001546  | <a href="#">DRGMPSDSPEKR</a> |

Mascot: <http://www.matrixscience.com/>

# MASCOT Search Results

## Peptide View

MS/MS Fragmentation of **EPTMYVGSTSVQTSR**

Found in **C1S\_HUMAN**, Complement C1s subcomponent OS=Homo sapiens GN=C1S PE=1 SV=1

Match to Query 38390: 1952.927052 from(651.982960,3+) rtinseconds(1913) index(45339)

Title: Locus:1.1.1.3379.10 File:"2013-07-02 CLN FXIII 180 min 3rd F 4.wiff"

Data file C:\Program Files (x86)\Matrix Science\Mascot Daemon\mgf9 FXIII 180 min 3rd\mascot\_daemon\_merge.mgf

Click mouse within plot area to zoom in by factor of two about that point

Or, Plot from  to  Da

Label all possible matches  Label matches used for scoring

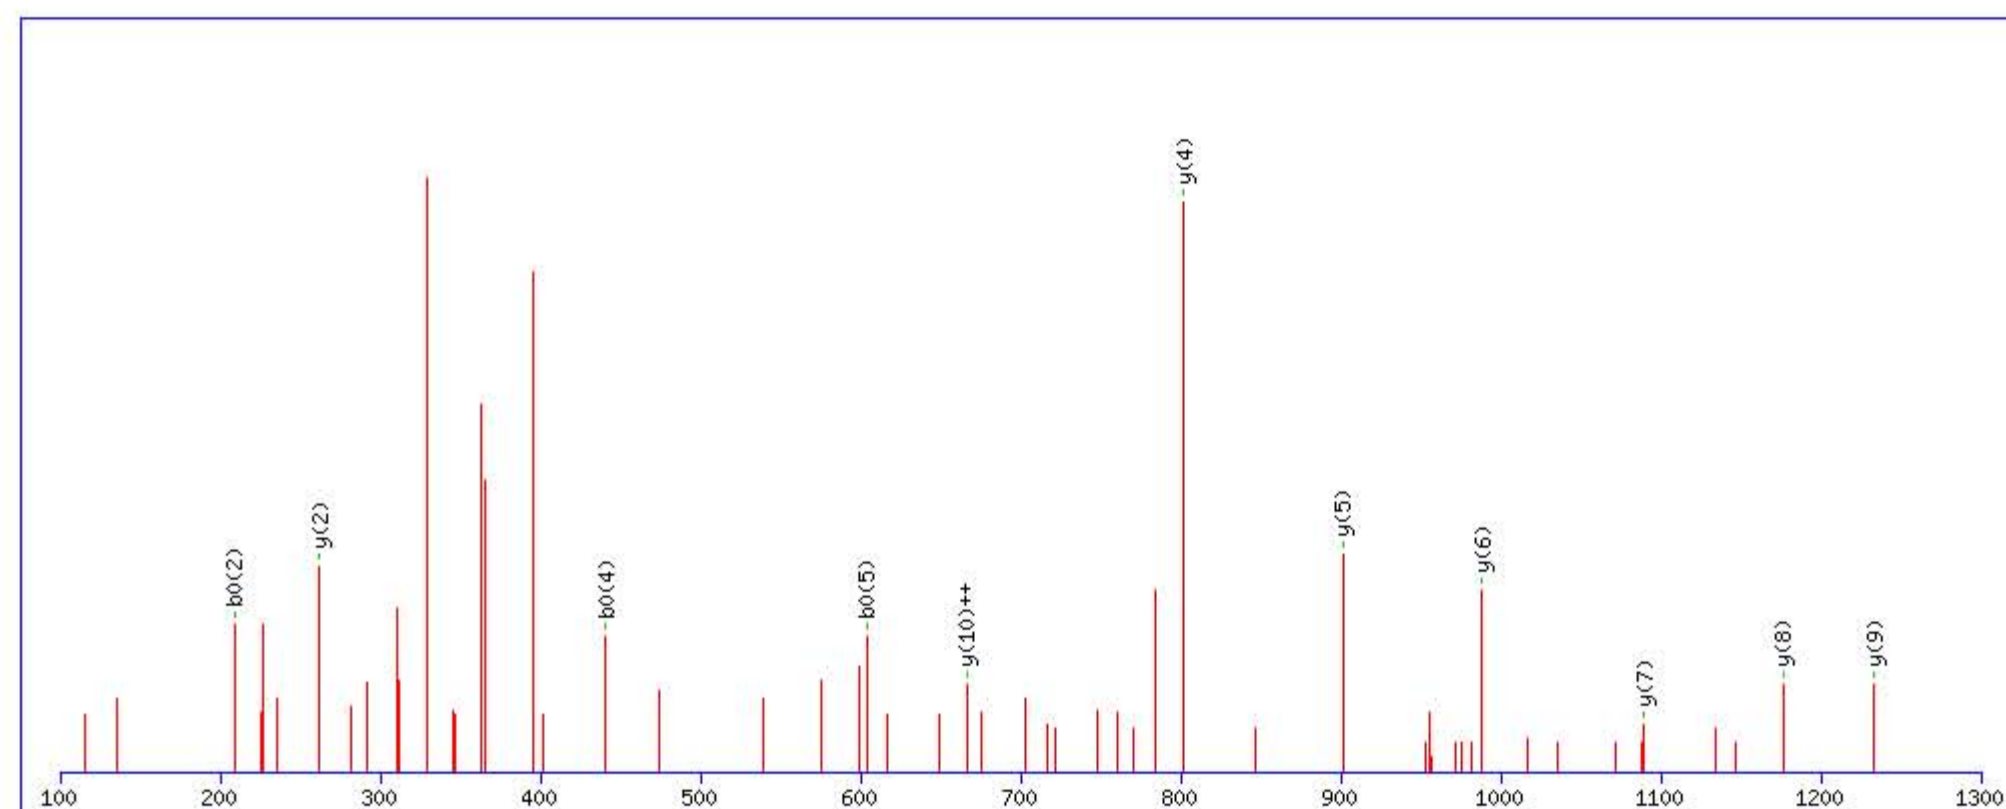

Monoisotopic mass of neutral peptide Mr(calc): 1952.933594

Fixed modifications: Carbamidomethyl (C) (apply to specified residues or termini only)

Variable modifications:

Q12 : Biotin:Thermo-21345 (Q)

Ions Score: 47 Expect: 0.00023

Matches : 11/144 fragment ions using 12 most intense peaks [\(help\)](#)

| #  | b           | b <sup>++</sup> | b <sup>*</sup> | b <sup>*++</sup> | b <sup>0</sup> | b <sup>0++</sup> | Seq. | y           | y <sup>++</sup> | y <sup>*</sup> | y <sup>*++</sup> | y <sup>0</sup> | y <sup>0++</sup> | #  |
|----|-------------|-----------------|----------------|------------------|----------------|------------------|------|-------------|-----------------|----------------|------------------|----------------|------------------|----|
| 1  | 130.049869  | 65.528572       |                |                  | 112.039304     | 56.523290        | E    |             |                 |                |                  |                |                  | 15 |
| 2  | 227.102633  | 114.054954      |                |                  | 209.092068     | 105.049672       | P    | 1824.898269 | 912.952773      | 1807.871720    | 904.439498       | 1806.887704    | 903.947490       | 14 |
| 3  | 328.150312  | 164.578794      |                |                  | 310.139747     | 155.573512       | T    | 1727.845505 | 864.426391      | 1710.818956    | 855.913116       | 1709.834940    | 855.421108       | 13 |
| 4  | 459.190797  | 230.099036      |                |                  | 441.180232     | 221.093754       | M    | 1626.797826 | 813.902551      | 1609.771277    | 805.389277       | 1608.787261    | 804.897269       | 12 |
| 5  | 622.254126  | 311.630701      |                |                  | 604.243561     | 302.625419       | Y    | 1495.757341 | 748.382309      | 1478.730792    | 739.869034       | 1477.746776    | 739.377026       | 11 |
| 6  | 721.322540  | 361.164908      |                |                  | 703.311975     | 352.159626       | V    | 1332.694012 | 666.850644      | 1315.667463    | 658.337370       | 1314.683447    | 657.845362       | 10 |
| 7  | 778.344004  | 389.675640      |                |                  | 760.333439     | 380.670358       | G    | 1233.625598 | 617.316437      | 1216.599049    | 608.803163       | 1215.615033    | 608.311155       | 9  |
| 8  | 865.376032  | 433.191654      |                |                  | 847.365467     | 424.186372       | S    | 1176.604134 | 588.805705      | 1159.577585    | 580.292431       | 1158.593569    | 579.800423       | 8  |
| 9  | 966.423711  | 483.715494      |                |                  | 948.413146     | 474.710211       | T    | 1089.572106 | 545.289691      | 1072.545557    | 536.776417       | 1071.561541    | 536.284409       | 7  |
| 10 | 1053.455739 | 527.231508      |                |                  | 1035.445174    | 518.226225       | S    | 988.524427  | 494.765852      | 971.497878     | 486.252577       | 970.513862     | 485.760569       | 6  |
| 11 | 1152.524153 | 576.765715      |                |                  | 1134.513588    | 567.760432       | V    | 901.492399  | 451.249838      | 884.465850     | 442.736563       | 883.481834     | 442.244555       | 5  |
| 12 | 1591.749479 | 796.378378      | 1574.722930    | 787.865103       | 1573.738914    | 787.373095       | Q    | 802.423985  | 401.715631      | 785.397436     | 393.202356       | 784.413420     | 392.710348       | 4  |
| 13 | 1692.797158 | 846.902217      | 1675.770609    | 838.388943       | 1674.786593    | 837.896935       | T    | 363.198659  | 182.102968      | 346.172110     | 173.589693       | 345.188094     | 173.097685       | 3  |
| 14 | 1779.829186 | 890.418231      | 1762.802637    | 881.904957       | 1761.818621    | 881.412949       | S    | 262.150980  | 131.579128      | 245.124431     | 123.065854       | 244.140415     | 122.573846       | 2  |
| 15 |             |                 |                |                  |                |                  | R    | 175.118952  | 88.063114       | 158.092403     | 79.549839        |                |                  | 1  |

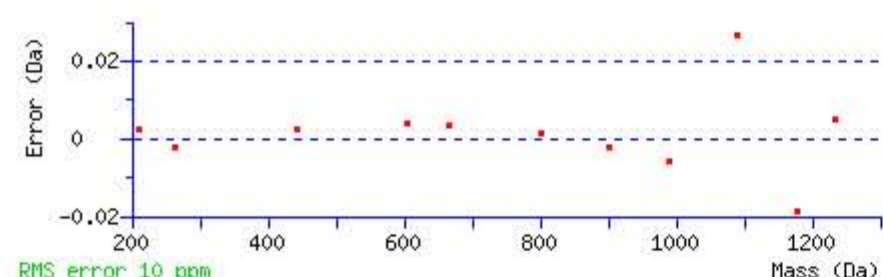

RMS error 10 ppm

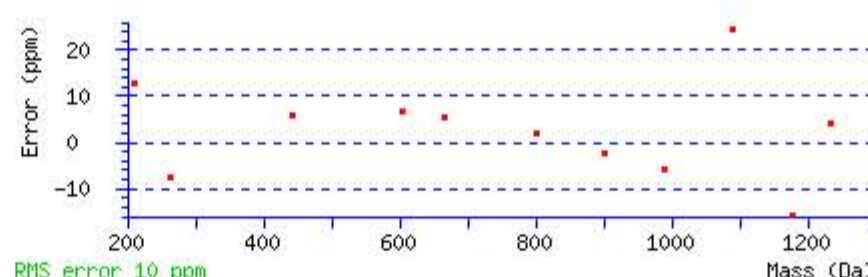

RMS error 10 ppm

NCBI BLAST search of [EPTMYVGSTSVQTSR](#)

(Parameters: blastp, nr protein database, expect=20000, no filter, PAM30)

Other BLAST [web gateways](#)

All matches to this query

| Score | Mr(calc):   | Delta     | Sequence                        |
|-------|-------------|-----------|---------------------------------|
| 46.9  | 1952.933594 | -0.006542 | <a href="#">EPTMYVGSTSVQTSR</a> |
| 8.0   | 1952.944794 | -0.017742 | <a href="#">MNQVTSKYANQSAGK</a> |

Mascot: <http://www.matrixscience.com/>

**MASCOT** SCIENCE **Mascot Search Results**

**Peptide View**

MS/MS Fragmentation of **SNALDIIFQTDLTGQK**

Found in **C1S\_HUMAN**, Complement C1s subcomponent OS=Homo sapiens GN=C1S PE=1 SV=1

Match to Query 41241: 2074.072122 from(692.364650,3+) rtinseconds(2875) index(37159)

Title: Locus:1.1.1.3663.10 File:"2013-07-02 CLN FXIII 180 min 3rd F 3.wiff"

Data file C:\Program Files (x86)\Matrix Science\Mascot Daemon\mgf\9 FXIII 180 min 3rd\mascot\_daemon\_merge.mgf

Click mouse within plot area to zoom in by factor of two about that point

Or, Plot from  to  Da

Label all possible matches  Label matches used for scoring

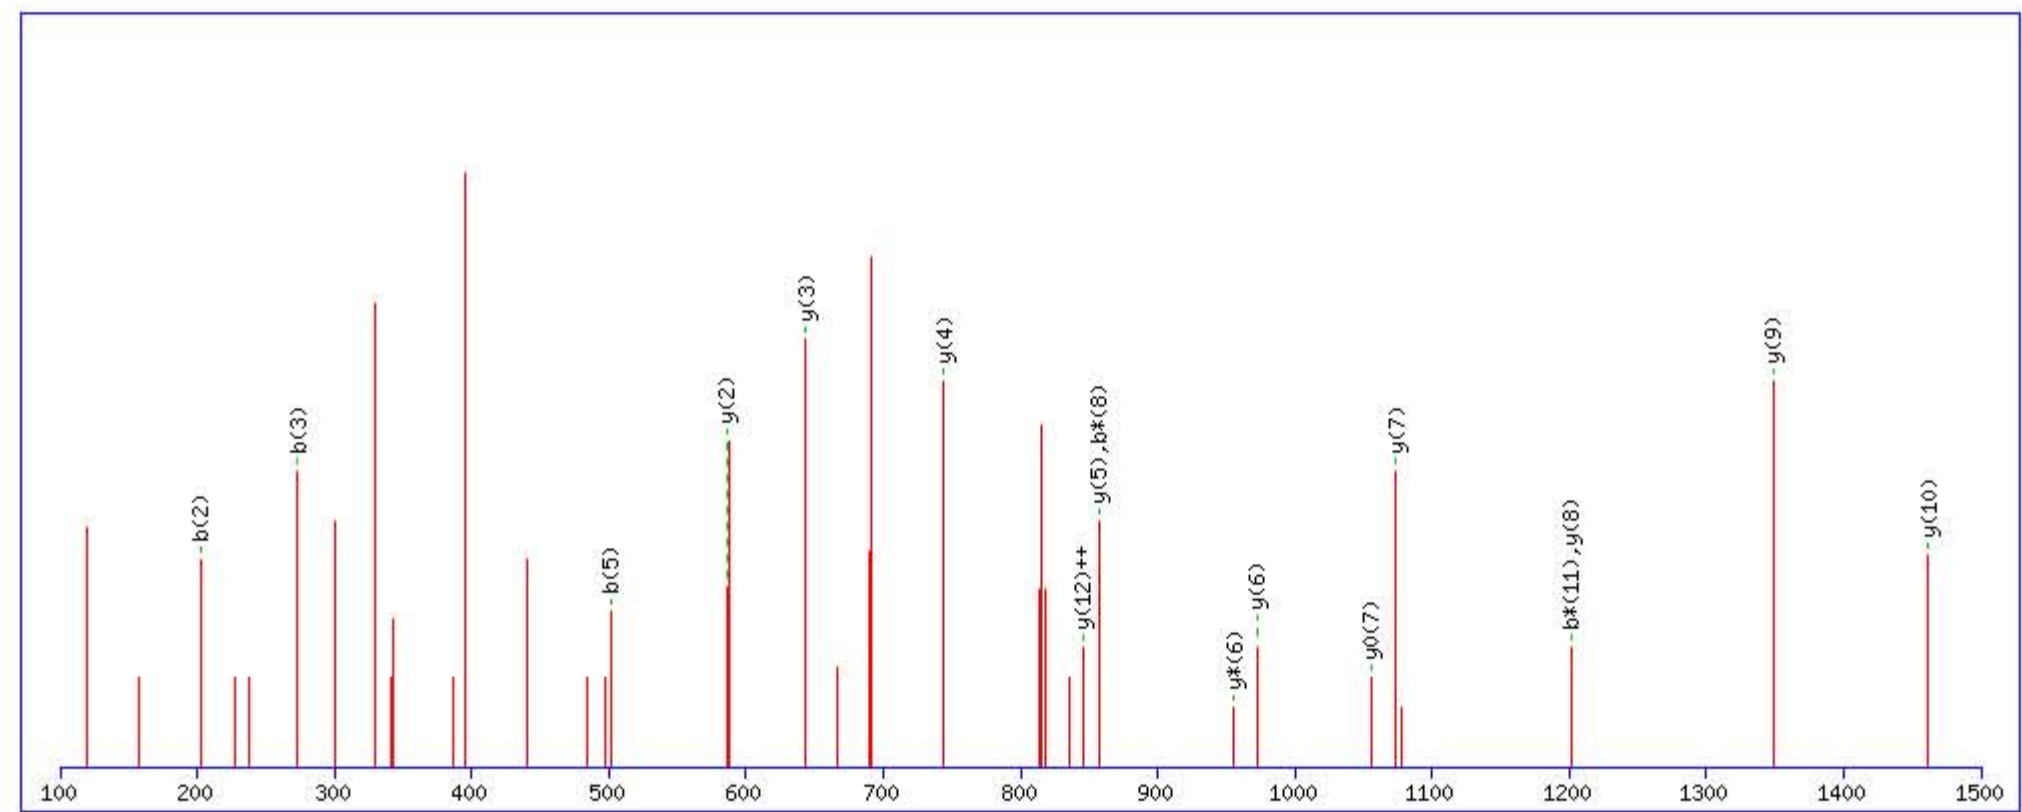

Monoisotopic mass of neutral peptide  $M_r(\text{calc})$ : 2074.076874

Fixed modifications: Carbamidomethyl (C) (apply to specified residues or termini only)

Variable modifications:

Q15 : Biotin:Thermo-21345 (Q)

Ions Score: 58 Expect: 4.2e-005

Matches : 17/172 fragment ions using 23 most intense peaks [\(help\)](#)

| #  | b           | b <sup>++</sup> | b <sup>*</sup> | b <sup>*++</sup> | b <sup>0</sup> | b <sup>0++</sup> | Seq. | y           | y <sup>++</sup> | y <sup>*</sup> | y <sup>*++</sup> | y <sup>0</sup> | y <sup>0++</sup> | #  |
|----|-------------|-----------------|----------------|------------------|----------------|------------------|------|-------------|-----------------|----------------|------------------|----------------|------------------|----|
| 1  | 88.039304   | 44.523290       |                |                  | 70.028739      | 35.518008        | S    |             |                 |                |                  |                |                  | 16 |
| 2  | 202.082231  | 101.544753      | 185.055682     | 93.031479        | 184.071666     | 92.539471        | N    | 1988.052127 | 994.529702      | 1971.025578    | 986.016427       | 1970.041562    | 985.524419       | 15 |
| 3  | 273.119345  | 137.063311      | 256.092796     | 128.550036       | 255.108780     | 128.058028       | A    | 1874.009200 | 937.508238      | 1856.982651    | 928.994964       | 1855.998635    | 928.502956       | 14 |
| 4  | 386.203409  | 193.605343      | 369.176860     | 185.092068       | 368.192844     | 184.600060       | L    | 1802.972086 | 901.989681      | 1785.945537    | 893.476407       | 1784.961521    | 892.984399       | 13 |
| 5  | 501.230352  | 251.118814      | 484.203803     | 242.605540       | 483.219787     | 242.113532       | D    | 1689.888022 | 845.447649      | 1672.861473    | 836.934375       | 1671.877457    | 836.442367       | 12 |
| 6  | 614.314416  | 307.660846      | 597.287867     | 299.147572       | 596.303851     | 298.655564       | I    | 1574.861079 | 787.934178      | 1557.834530    | 779.420903       | 1556.850514    | 778.928895       | 11 |
| 7  | 727.398480  | 364.202878      | 710.371931     | 355.689604       | 709.387915     | 355.197596       | I    | 1461.777015 | 731.392146      | 1444.750466    | 722.878871       | 1443.766450    | 722.386863       | 10 |
| 8  | 874.466894  | 437.737085      | 857.440345     | 429.223811       | 856.456329     | 428.731803       | F    | 1348.692951 | 674.850114      | 1331.666402    | 666.336839       | 1330.682386    | 665.844831       | 9  |
| 9  | 1002.525472 | 501.766374      | 985.498923     | 493.253100       | 984.514907     | 492.761092       | Q    | 1201.624537 | 601.315907      | 1184.597988    | 592.802632       | 1183.613972    | 592.310624       | 8  |
| 10 | 1103.573151 | 552.290214      | 1086.546602    | 543.776939       | 1085.562586    | 543.284931       | T    | 1073.565959 | 537.286618      | 1056.539410    | 528.773343       | 1055.555394    | 528.281335       | 7  |
| 11 | 1218.600094 | 609.803685      | 1201.573545    | 601.290411       | 1200.589529    | 600.798403       | D    | 972.518280  | 486.762778      | 955.491731     | 478.249504       | 954.507715     | 477.757496       | 6  |
| 12 | 1331.684158 | 666.345717      | 1314.657609    | 657.832443       | 1313.673593    | 657.340435       | L    | 857.491337  | 429.249307      | 840.464788     | 420.736032       | 839.480772     | 420.244024       | 5  |
| 13 | 1432.731837 | 716.869557      | 1415.705288    | 708.356282       | 1414.721272    | 707.864274       | T    | 744.407273  | 372.707275      | 727.380724     | 364.194000       | 726.396708     | 363.701992       | 4  |
| 14 | 1489.753301 | 745.380289      | 1472.726752    | 736.867014       | 1471.742736    | 736.375006       | G    | 643.359594  | 322.183435      | 626.333045     | 313.670161       |                |                  | 3  |
| 15 | 1928.978627 | 964.992952      | 1911.952078    | 956.479677       | 1910.968062    | 955.987669       | Q    | 586.338130  | 293.672703      | 569.311581     | 285.159429       |                |                  | 2  |
| 16 |             |                 |                |                  |                |                  | K    | 147.112804  | 74.060040       | 130.086255     | 65.546765        |                |                  | 1  |

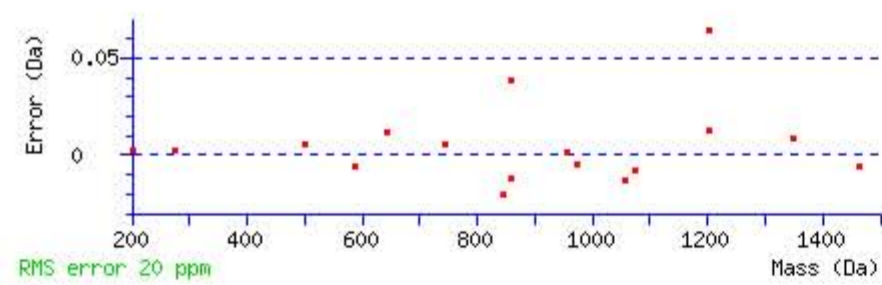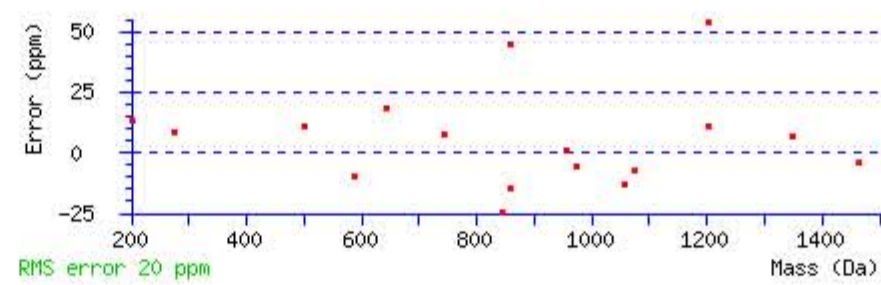

NCBI BLAST search of **SNALDIIFQTDLTGQK**

(Parameters: blastp, nr protein database, expect=20000, no filter, PAM30)

Other BLAST [web gateways](#)

All matches to this query

| Score | $M_r(\text{calc})$ : | Delta     | Sequence                         |
|-------|----------------------|-----------|----------------------------------|
| 58.1  | 2074.076874          | -0.004752 | <a href="#">SNALDIIFQTDLTGQK</a> |
| 10.0  | 2074.076874          | -0.004752 | <a href="#">SNALDIIFQTDLTGQK</a> |

Mascot: <http://www.matrixscience.com/>

**Peptide View**

MS/MS Fragmentation of **SSNNPHSPIVEEFQVPYNK**

Found in **C1S\_HUMAN**, Complement C1s subcomponent OS=Homo sapiens GN=C1S PE=1 SV=1

Match to Query 48467: 2496.209532 from(833.077120,3+) rtinseconds(2136) index(32653)

Title: Locus:1.1.1.3407.15 File:"2013-07-02 CLN FXIII 180 min 3rd F 3.wiff"

Data file C:\Program Files (x86)\Matrix Science\Mascot Daemon\mgf\9 FXIII 180 min 3rd\mascot\_daemon\_merge.mgf

Click mouse within plot area to zoom in by factor of two about that point

Or, Plot from 0 to 3000 Da Full range

Label all possible matches Label matches used for scoring

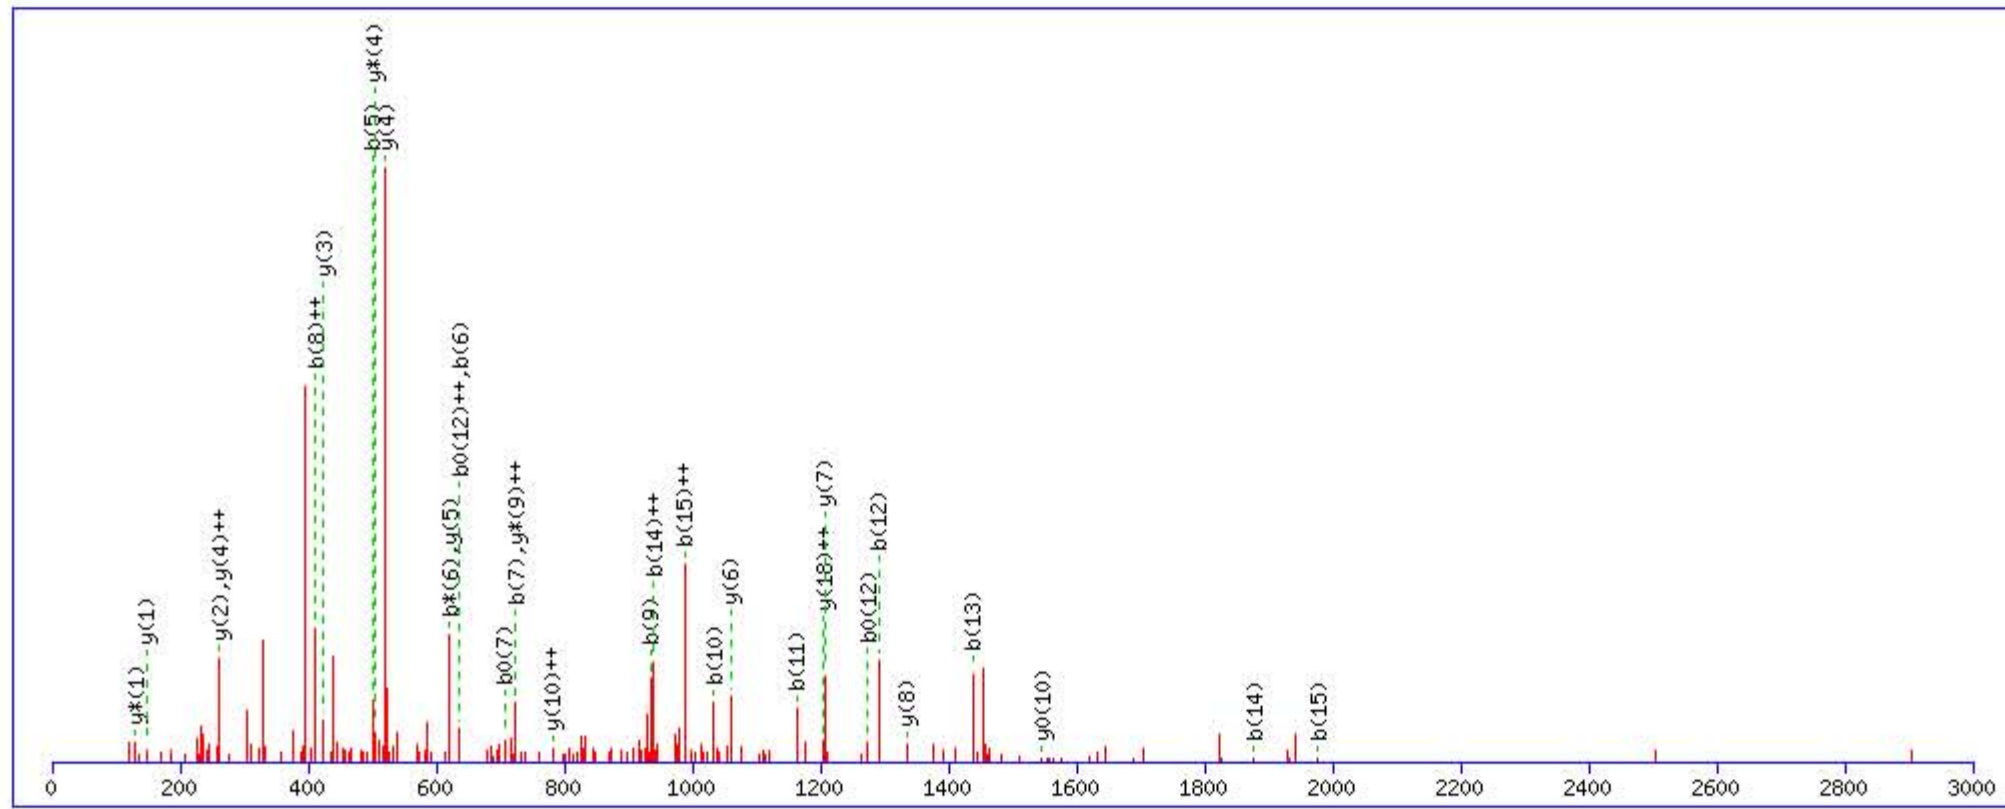

Monoisotopic mass of neutral peptide Mr(calc): 2496.210724

Fixed modifications: Carbamidomethyl (C) (apply to specified residues or termini only)

Variable modifications:

Q14 : Biotin:Thermo-21345 (Q)

Ions Score: 36 Expect: 0.00048

Matches : 32/198 fragment ions using 70 most intense peaks (help)

Table with 15 columns: #, b, b++, b+, b+\*\*, b0, b0\*\*, Seq., y, y\*\*, y+, y+\*\*, y0, y0\*\*, #. It lists various peptide fragments and their corresponding mass values and sequence types.

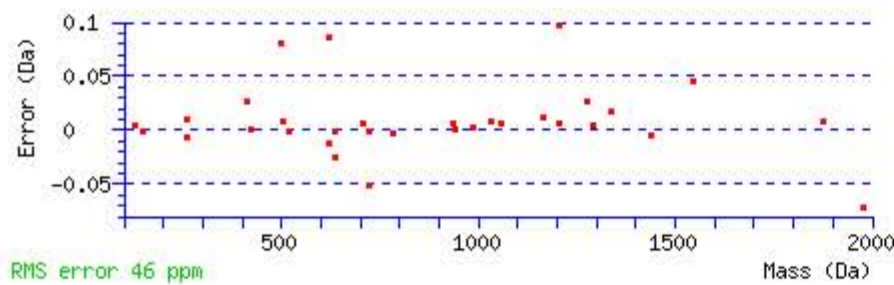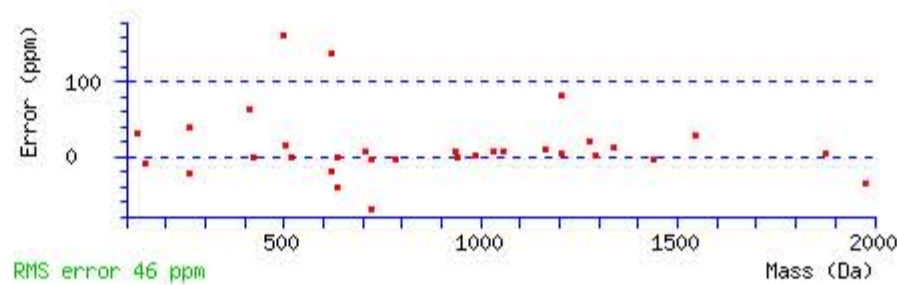

NCBI BLAST search of SSNNPHSPIVEEFQVPYNK (Parameters: blastp, nr protein database, expect=20000, no filter, PAM30) Other BLAST web gateways

All matches to this query

Table with 4 columns: Score, Mr(calc), Delta, Sequence. It shows the top two matches for the query.

## Peptide View

MS/MS Fragmentation of **SSGQWQTPGATR**

Found in **CO2\_HUMAN**, Complement C2 OS=Homo sapiens GN=C2 PE=1 SV=2

Match to Query 29966: 1585.771128 from(793.892840,2+) rtinseconds(1731) index(59086)

Title: Locus:1.1.1.1514.11 File:"2013-07-02 CLN FXIII 180 min 3rd FT.wiff"

Data file C:\Program Files (x86)\Matrix Science\Mascot Daemon\mgf\9 FXIII 180 min 3rd\mascot\_daemon\_merge.mgf

Click mouse within plot area to zoom in by factor of two about that point

Or, Plot from 0 to 2400 Da Full range

Label all possible matches  Label matches used for scoring

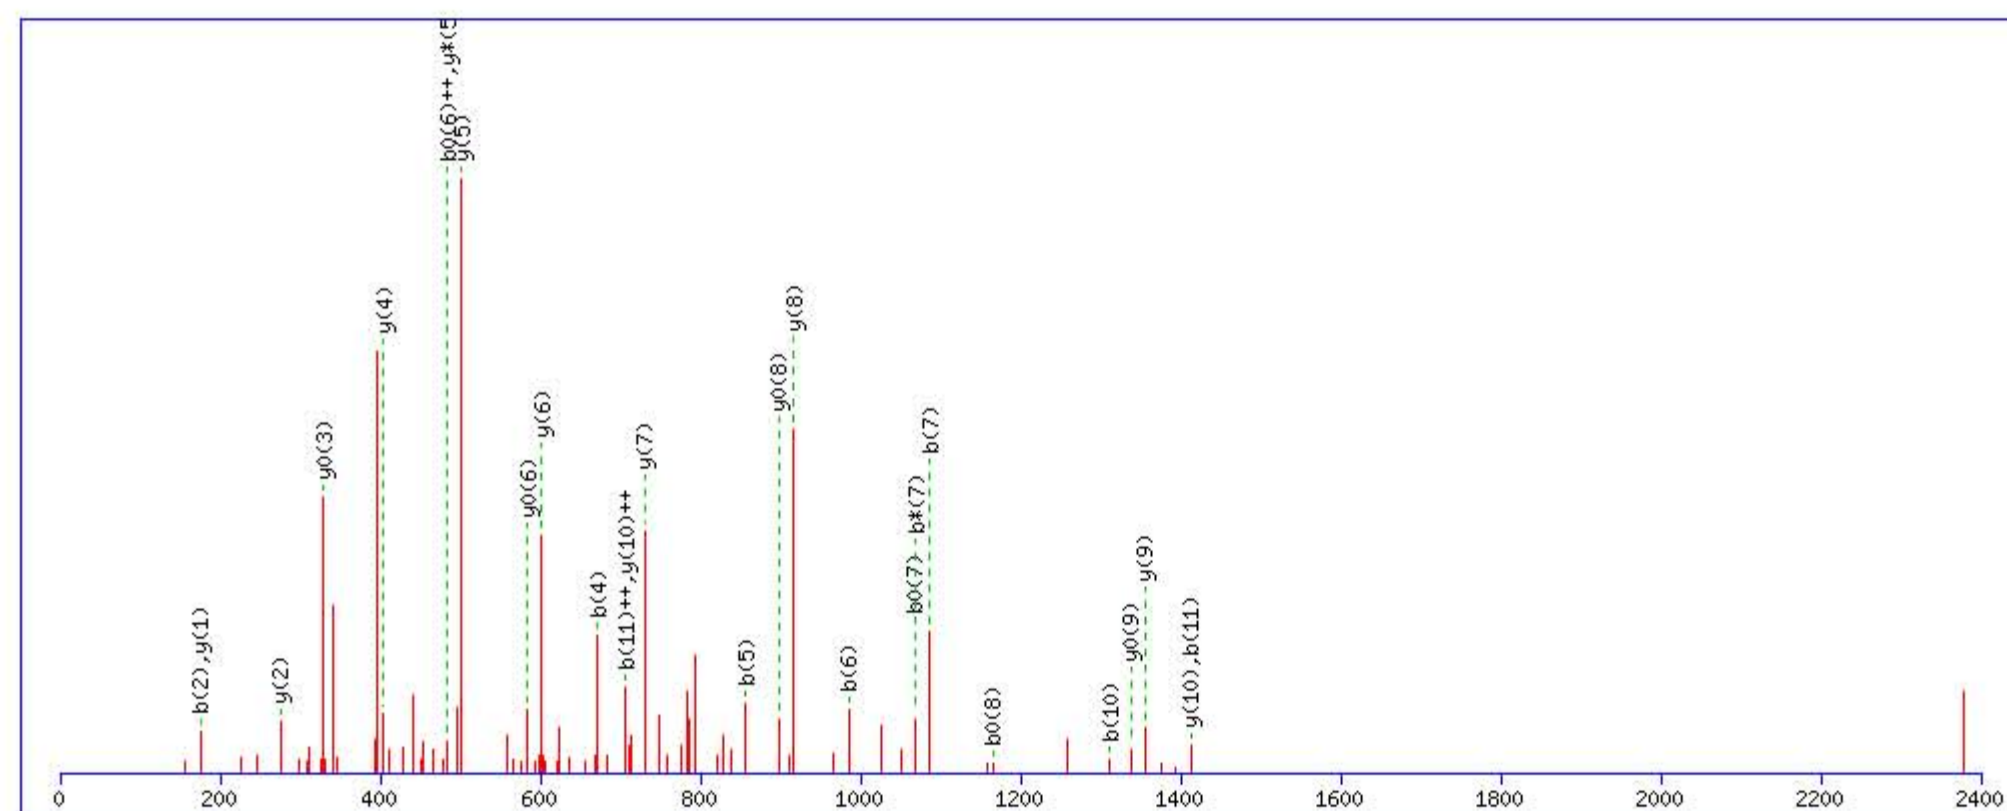

Monoisotopic mass of neutral peptide  $M_r(\text{calc})$ : 1585.767120

Fixed modifications: Carbamidomethyl (C) (apply to specified residues or termini only)

Variable modifications:

Q4 : Biotin:Thermo-21345 (Q)

Ions Score: 60 Expect: 1e-005

Matches : 27/124 fragment ions using 38 most intense peaks [\(help\)](#)

| #  | b                  | b <sup>++</sup>   | b <sup>*</sup>     | b <sup>+++</sup> | b <sup>0</sup>     | b <sup>0++</sup> | Seq. | y                  | y <sup>++</sup>   | y <sup>*</sup>    | y <sup>+++</sup> | y <sup>0</sup>     | y <sup>0++</sup> | #  |
|----|--------------------|-------------------|--------------------|------------------|--------------------|------------------|------|--------------------|-------------------|-------------------|------------------|--------------------|------------------|----|
| 1  | 88.039304          | 44.523290         |                    |                  | 70.028739          | 35.518008        | S    |                    |                   |                   |                  |                    |                  | 12 |
| 2  | <b>175.071332</b>  | 88.039304         |                    |                  | 157.060767         | 79.034021        | S    | 1499.742361        | 750.374818        | 1482.715812       | 741.861544       | 1481.731796        | 741.369536       | 11 |
| 3  | 232.092796         | 116.550036        |                    |                  | 214.082231         | 107.544753       | G    | <b>1412.710333</b> | <b>706.858805</b> | 1395.683784       | 698.345530       | 1394.699768        | 697.853522       | 10 |
| 4  | <b>671.318122</b>  | 336.162699        | 654.291573         | 327.649425       | 653.307557         | 327.157417       | Q    | <b>1355.688869</b> | 678.348072        | 1338.662320       | 669.834798       | <b>1337.678304</b> | 669.342790       | 9  |
| 5  | <b>857.397435</b>  | 429.202356        | 840.370886         | 420.689081       | 839.386870         | 420.197073       | W    | <b>916.463543</b>  | 458.735410        | 899.436994        | 450.222135       | <b>898.452978</b>  | 449.730127       | 8  |
| 6  | <b>985.456013</b>  | 493.231645        | 968.429464         | 484.718370       | 967.445448         | 484.226362       | Q    | <b>730.384230</b>  | 365.695753        | 713.357681        | 357.182478       | 712.373665         | 356.690470       | 7  |
| 7  | <b>1086.503692</b> | 543.755484        | <b>1069.477143</b> | 535.242210       | <b>1068.493127</b> | 534.750202       | T    | <b>602.325652</b>  | 301.666464        | 585.299103        | 293.153189       | <b>584.315087</b>  | 292.661181       | 6  |
| 8  | 1183.556456        | 592.281866        | 1166.529907        | 583.768592       | <b>1165.545891</b> | 583.276584       | P    | <b>501.277973</b>  | 251.142624        | <b>484.251424</b> | 242.629350       | 483.267408         | 242.137342       | 5  |
| 9  | 1240.577920        | 620.792598        | 1223.551371        | 612.279324       | 1222.567355        | 611.787315       | G    | <b>404.225209</b>  | 202.616242        | 387.198660        | 194.102968       | 386.214644         | 193.610960       | 4  |
| 10 | <b>1311.615034</b> | 656.311155        | 1294.588485        | 647.797881       | 1293.604469        | 647.305872       | A    | 347.203745         | 174.105510        | 330.177196        | 165.592236       | <b>329.193180</b>  | 165.100228       | 3  |
| 11 | <b>1412.662713</b> | <b>706.834994</b> | 1395.636164        | 698.321720       | 1394.652148        | 697.829712       | T    | <b>276.166631</b>  | 138.586953        | 259.140082        | 130.073679       | 258.156066         | 129.581671       | 2  |
| 12 |                    |                   |                    |                  |                    |                  | R    | <b>175.118952</b>  | 88.063114         | 158.092403        | 79.549839        |                    |                  | 1  |

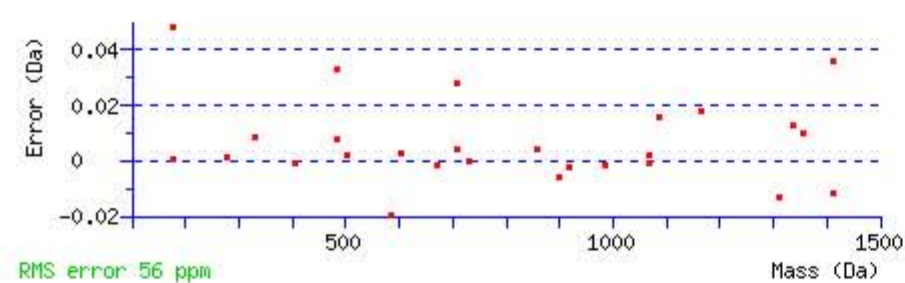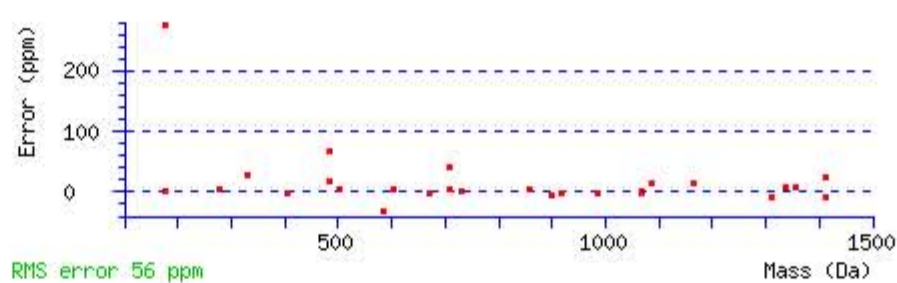

NCBI BLAST search of **SSGQWQTPGATR**

(Parameters: blastp, nr protein database, expect=20000, no filter, PAM30)

Other BLAST [web gateways](#)

All matches to this query

| Score | $M_r(\text{calc})$ : | Delta     | Sequence                          |
|-------|----------------------|-----------|-----------------------------------|
| 60.3  | 1585.767120          | 0.004008  | <a href="#">SSGQWQTPGATR</a>      |
| 32.5  | 1585.767120          | 0.004008  | <a href="#">SSGQWQTPGATR</a>      |
| 6.6   | 1585.751846          | 0.019282  | <a href="#">LMDEPALRSPGGGDR</a>   |
| 4.5   | 1585.766922          | 0.004206  | <a href="#">RTSNERPGSGQGQGR</a>   |
| 4.3   | 1585.781006          | -0.009878 | <a href="#">AYHLVCLDPELEK</a>     |
| 3.6   | 1585.769592          | 0.001536  | <a href="#">ETDHLKSLSSPDKR</a>    |
| 3.6   | 1585.769653          | 0.001475  | <a href="#">GDVGTAGSVGGTGEPLR</a> |
| 2.9   | 1585.765717          | 0.005411  | <a href="#">DLEELPALEEFAMR</a>    |
| 2.6   | 1585.767075          | 0.004053  | <a href="#">AWENLGEQMKGAPR</a>    |
| 1.1   | 1585.794785          | -0.023657 | <a href="#">VVDDDDGETIAVLGAGR</a> |



**MASCOT** **SCIENCE** Mascot Search Results

**Peptide View**

MS/MS Fragmentation of **SGQSEDR**

Found in **CO3\_HUMAN**, Complement C3 OS=Homo sapiens GN=C3 PE=1 SV=2

Match to Query 13625: 1088.492168 from(545.253360,2+) rtinseconds(1164) index(27387)

Title: Locus:1.1.1.3068.6 File:"2013-07-02 CLN FXIII 180 min 3rd F 3.wiff"

Data file C:\Program Files (x86)\Matrix Science\Mascot Daemon\mgf9 FXIII 180 min 3rd\mascot\_daemon\_merge.mgf

Click mouse within plot area to zoom in by factor of two about that point

Or, Plot from  to  Da

Label all possible matches  Label matches used for scoring

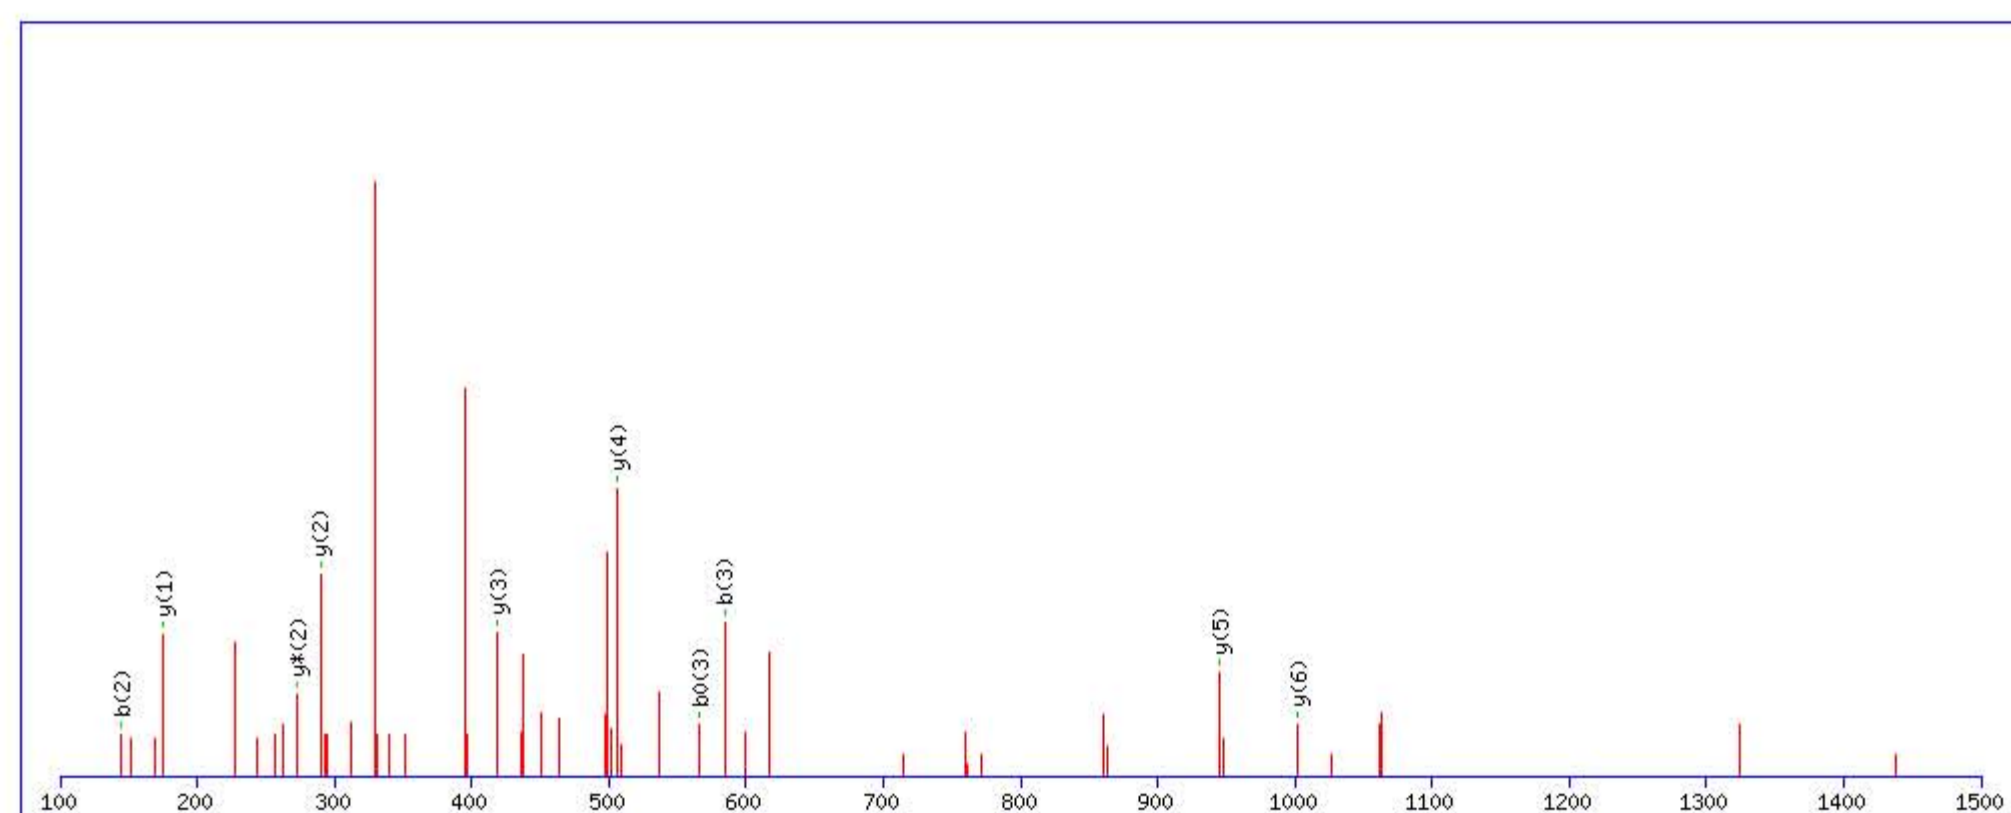

Monoisotopic mass of neutral peptide  $M_r(\text{calc})$ : 1088.492050

Fixed modifications: Carbamidomethyl (C) (apply to specified residues or termini only)

Variable modifications:

Q3 : Biotin:Thermo-21345 (Q)

Ions Score: 28 Expect: 0.0023

Matches : 10/66 fragment ions using 27 most intense peaks [\(help\)](#)

| # | b                 | b <sup>++</sup> | b <sup>*</sup> | b <sup>*++</sup> | b <sup>0</sup>    | b <sup>0++</sup> | Seq. | y                  | y <sup>++</sup> | y <sup>*</sup>    | y <sup>*++</sup> | y <sup>0</sup> | y <sup>0++</sup> | # |
|---|-------------------|-----------------|----------------|------------------|-------------------|------------------|------|--------------------|-----------------|-------------------|------------------|----------------|------------------|---|
| 1 | 88.039304         | 44.523290       |                |                  | 70.028739         | 35.518008        | S    |                    |                 |                   |                  |                |                  | 7 |
| 2 | <b>145.060768</b> | 73.034022       |                |                  | 127.050203        | 64.028740        | G    | <b>1002.467306</b> | 501.737291      | 985.440757        | 493.224017       | 984.456741     | 492.732009       | 6 |
| 3 | <b>584.286094</b> | 292.646685      | 567.259545     | 284.133411       | <b>566.275529</b> | 283.641403       | Q    | <b>945.445842</b>  | 473.226559      | 928.419293        | 464.713285       | 927.435277     | 464.221277       | 5 |
| 4 | 671.318122        | 336.162699      | 654.291573     | 327.649425       | 653.307557        | 327.157417       | S    | <b>506.220516</b>  | 253.613896      | 489.193967        | 245.100621       | 488.209951     | 244.608613       | 4 |
| 5 | 800.360715        | 400.683996      | 783.334166     | 392.170721       | 782.350150        | 391.678713       | E    | <b>419.188488</b>  | 210.097882      | 402.161939        | 201.584608       | 401.177923     | 201.092600       | 3 |
| 6 | 915.387658        | 458.197467      | 898.361109     | 449.684192       | 897.377093        | 449.192185       | D    | <b>290.145895</b>  | 145.576585      | <b>273.119346</b> | 137.063311       | 272.135330     | 136.571303       | 2 |
| 7 |                   |                 |                |                  |                   |                  | R    | <b>175.118952</b>  | 88.063114       | 158.092403        | 79.549840        |                |                  | 1 |

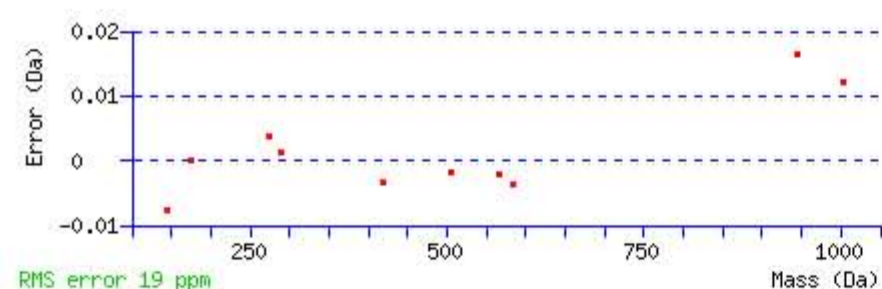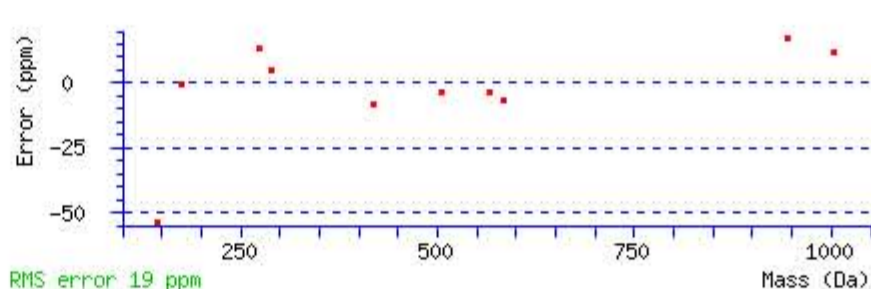

NCBI BLAST search of **SGQSEDR**

(Parameters: blastp, nr protein database, expect=20000, no filter, PAM30)

Other BLAST [web gateways](#)

All matches to this query

| Score | $M_r(\text{calc})$ : | Delta    | Sequence                  |
|-------|----------------------|----------|---------------------------|
| 28.3  | 1088.492050          | 0.000118 | <a href="#">SGQSEDR</a>   |
| 0.1   | 1088.478134          | 0.014034 | <a href="#">SQGCPNRDR</a> |

# MASCOT SCIENCE Mascot Search Results

## Peptide View

MS/MS Fragmentation of **SVQLTEK**

Found in **CO3\_HUMAN**, Complement C3 OS=Homo sapiens GN=C3 PE=1 SV=2

Match to Query 14637: 1114.601068 from(558.307810,2+) rtinseconds(1572) index(43315)

Title: Locus:1.1.1.3260.11 File:"2013-07-02 CLN FXIII 180 min 3rd F 4.wiff"

Data file C:\Program Files (x86)\Matrix Science\Mascot Daemon\mgf9 FXIII 180 min 3rd\mascot\_daemon\_merge.mgf

Click mouse within plot area to zoom in by factor of two about that point

Or, Plot from  to  Da

Label all possible matches  Label matches used for scoring

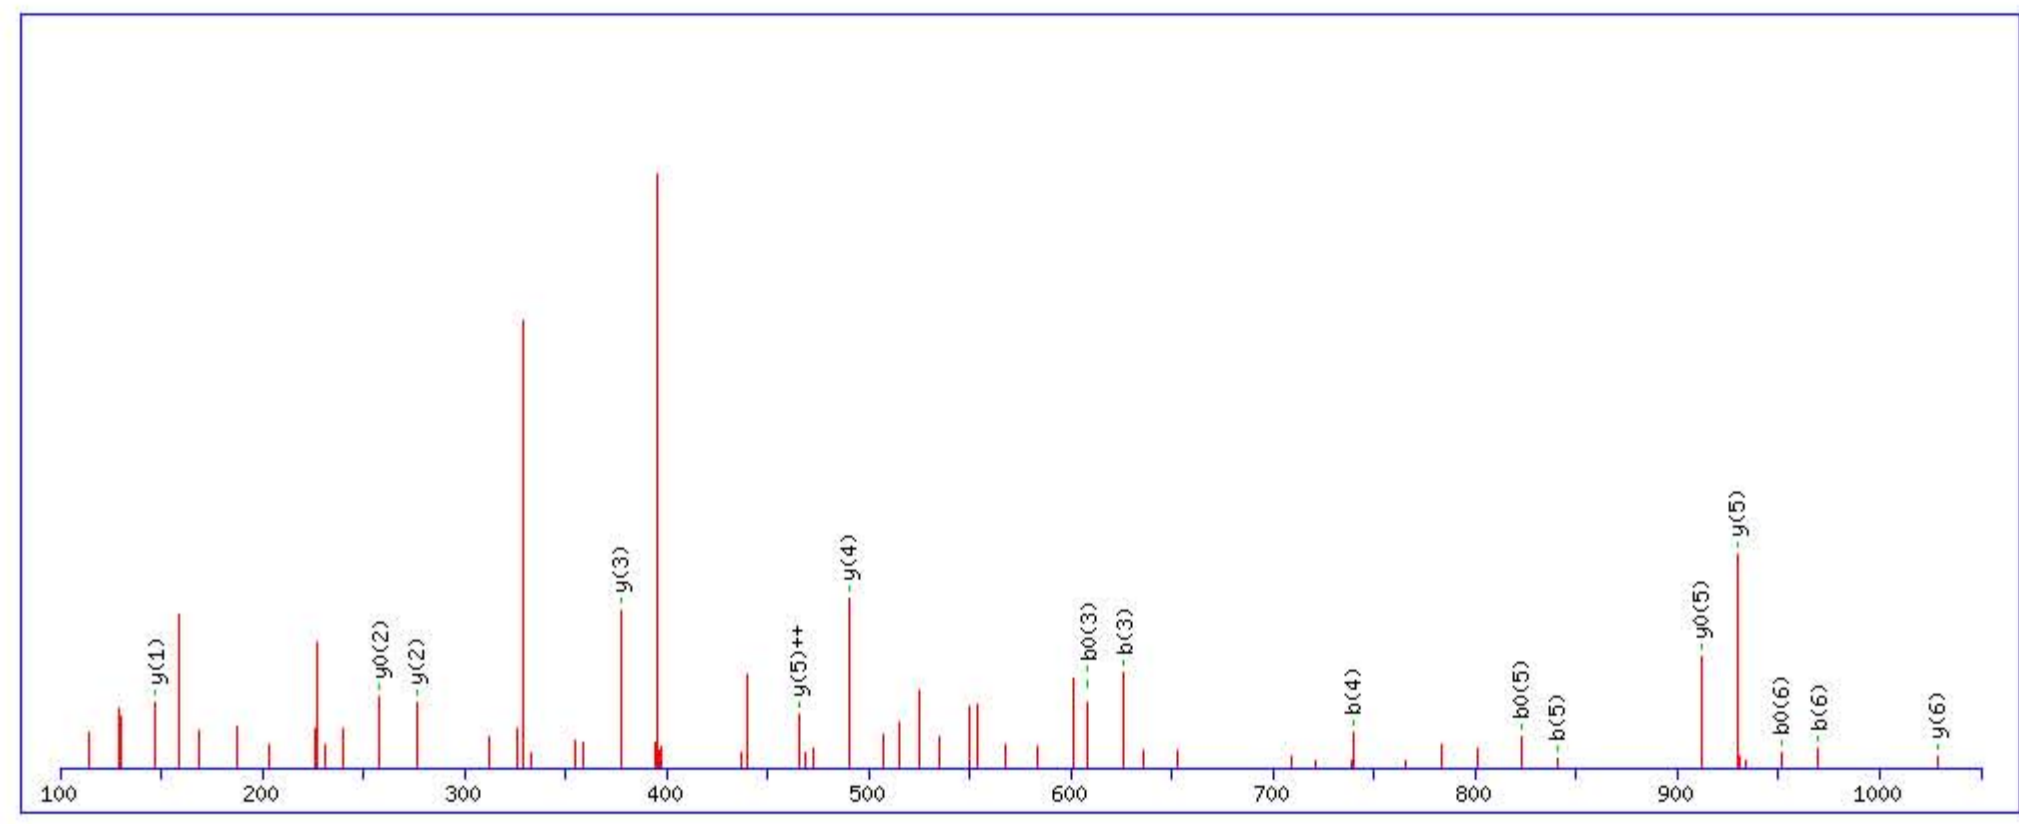

Monoisotopic mass of neutral peptide Mr(calc): 1114.605621

Fixed modifications: Carbamidomethyl (C) (apply to specified residues or termini only)

Variable modifications:

Q3 : Biotin:Thermo-21345 (Q)

Ions Score: 32 Expect: 0.013

Matches : 16/66 fragment ions using 28 most intense peaks [\(help\)](#)

| # | b          | b <sup>++</sup> | b <sup>*</sup> | b <sup>*++</sup> | b <sup>0</sup> | b <sup>0++</sup> | Seq. | y           | y <sup>++</sup> | y <sup>*</sup> | y <sup>*++</sup> | y <sup>0</sup> | y <sup>0++</sup> | # |
|---|------------|-----------------|----------------|------------------|----------------|------------------|------|-------------|-----------------|----------------|------------------|----------------|------------------|---|
| 1 | 88.039304  | 44.523290       |                |                  | 70.028739      | 35.518008        | S    |             |                 |                |                  |                |                  | 7 |
| 2 | 187.107718 | 94.057497       |                |                  | 169.097153     | 85.052214        | V    | 1028.580880 | 514.794078      | 1011.554331    | 506.280804       | 1010.570315    | 505.788796       | 6 |
| 3 | 626.333044 | 313.670160      | 609.306495     | 305.156885       | 608.322479     | 304.664877       | Q    | 929.512466  | 465.259871      | 912.485917     | 456.746597       | 911.501901     | 456.254589       | 5 |
| 4 | 739.417108 | 370.212192      | 722.390559     | 361.698917       | 721.406543     | 361.206909       | L    | 490.287140  | 245.647208      | 473.260591     | 237.133934       | 472.276575     | 236.641926       | 4 |
| 5 | 840.464787 | 420.736032      | 823.438238     | 412.222757       | 822.454222     | 411.730749       | T    | 377.203076  | 189.105176      | 360.176527     | 180.591902       | 359.192511     | 180.099894       | 3 |
| 6 | 969.507380 | 485.257328      | 952.480831     | 476.744054       | 951.496815     | 476.252046       | E    | 276.155397  | 138.581336      | 259.128848     | 130.068062       | 258.144832     | 129.576054       | 2 |
| 7 |            |                 |                |                  |                |                  | K    | 147.112804  | 74.060040       | 130.086255     | 65.546765        |                |                  | 1 |

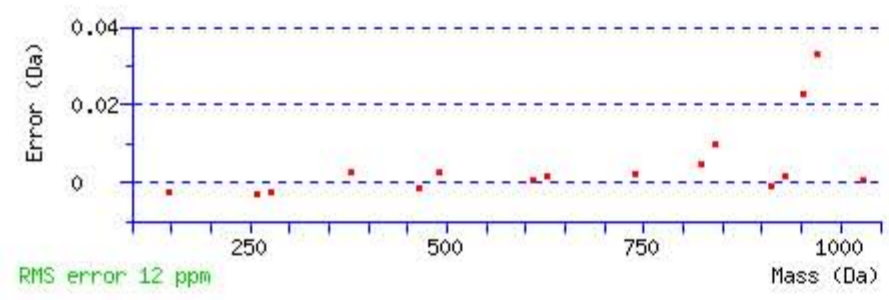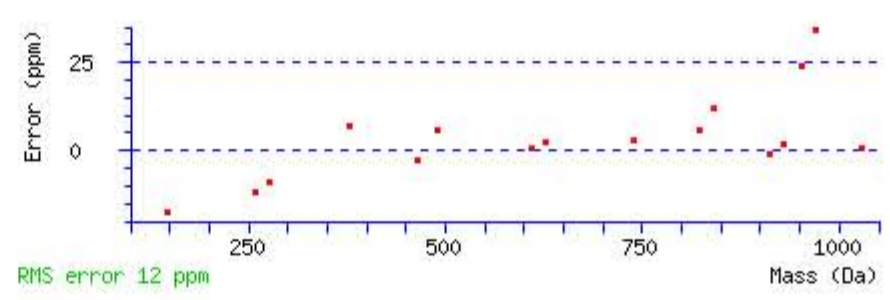

NCBI BLAST search of **SVQLTEK**

(Parameters: blastp, nr protein database, expect=20000, no filter, PAM30)

Other BLAST [web gateways](#)

All matches to this query

| Score | Mr(calc):   | Delta     | Sequence                    |
|-------|-------------|-----------|-----------------------------|
| 31.9  | 1114.605621 | -0.004553 | <a href="#">SVQLTEK</a>     |
| 11.0  | 1114.613480 | -0.012412 | <a href="#">SVFAKHGLEK</a>  |
| 7.5   | 1114.591690 | 0.009378  | <a href="#">ASVHSMISRK</a>  |
| 4.5   | 1114.609436 | -0.008368 | <a href="#">EGIKRQQEK</a>   |
| 3.7   | 1114.584503 | 0.016565  | <a href="#">DAQVFPK</a>     |
| 3.0   | 1114.588318 | 0.012750  | <a href="#">RHTGEKPYK</a>   |
| 2.4   | 1114.613480 | -0.012412 | <a href="#">NKEIVHTFK</a>   |
| 2.2   | 1114.598190 | 0.002878  | <a href="#">QEQAACLAK</a>   |
| 2.1   | 1114.609451 | -0.008383 | <a href="#">SVARLSPETR</a>  |
| 2.0   | 1114.598236 | 0.002832  | <a href="#">SAVITSLDPGR</a> |

# MASCOT Search Results

## Peptide View

MS/MS Fragmentation of **KQELSEAEQATR**

Found in **CO3\_HUMAN**, Complement C3 OS=Homo sapiens GN=C3 PE=1 SV=2

Match to Query 15525: 1699.847862 from(567.623230,3+) rtinseconds(1435) index(42461)

Title: Locus:1.1.1.3212.21 File:"2013-07-02 CLN FXIII 180 min 3rd F 4.wiff"

Data file C:\Program Files (x86)\Matrix Science\Mascot Daemon\mgf9 FXIII 180 min 3rd\mascot\_daemon\_merge.mgf

Click mouse within plot area to zoom in by factor of two about that point

Or, Plot from  to  Da

Label all possible matches  Label matches used for scoring

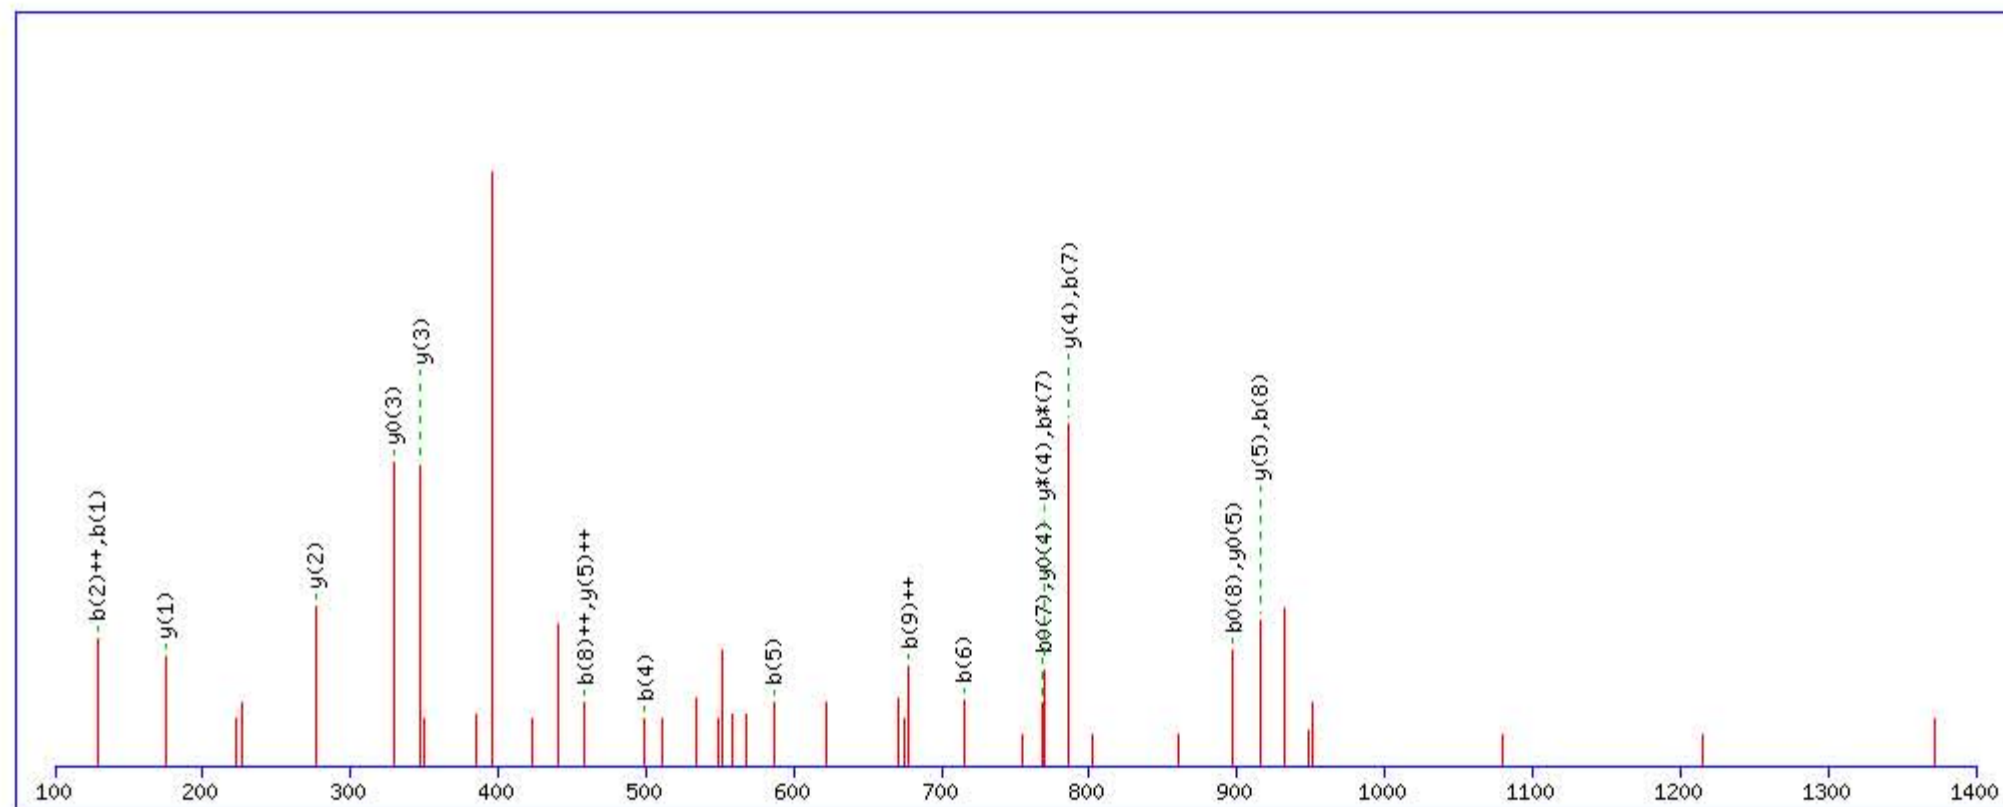

Monoisotopic mass of neutral peptide Mr(calc): 1699.856277

Fixed modifications: Carbamidomethyl (C) (apply to specified residues or termini only)

Variable modifications:

Q9 : Biotin:Thermo-21345 (Q)

Ions Score: 31 Expect: 0.014

Matches : 22/126 fragment ions using 28 most intense peaks [\(help\)](#)

| #  | b                 | b <sup>++</sup>   | b <sup>+</sup>    | b <sup>+++</sup> | b <sup>0</sup>    | b <sup>0++</sup> | Seq.     | y                 | y <sup>++</sup>   | y <sup>+</sup>    | y <sup>+++</sup> | y <sup>0</sup>    | y <sup>0++</sup> | #         |
|----|-------------------|-------------------|-------------------|------------------|-------------------|------------------|----------|-------------------|-------------------|-------------------|------------------|-------------------|------------------|-----------|
| 1  | <b>129.102239</b> | 65.054757         | 112.075690        | 56.541483        |                   |                  | <b>K</b> |                   |                   |                   |                  |                   |                  | <b>12</b> |
| 2  | 257.160817        | <b>129.084047</b> | 240.134268        | 120.570772       |                   |                  | <b>Q</b> | 1572.768634       | 786.887955        | 1555.742085       | 778.374681       | 1554.758069       | 777.882673       | <b>11</b> |
| 3  | 386.203410        | 193.605343        | 369.176861        | 185.092069       | 368.192845        | 184.600061       | <b>E</b> | 1444.710056       | 722.858666        | 1427.683507       | 714.345392       | 1426.699491       | 713.853384       | <b>10</b> |
| 4  | <b>499.287474</b> | 250.147375        | 482.260925        | 241.634101       | 481.276909        | 241.142093       | <b>L</b> | 1315.667463       | 658.337370        | 1298.640914       | 649.824095       | 1297.656898       | 649.332087       | <b>9</b>  |
| 5  | <b>586.319502</b> | 293.663389        | 569.292953        | 285.150115       | 568.308937        | 284.658107       | <b>S</b> | 1202.583399       | 601.795338        | 1185.556850       | 593.282063       | 1184.572834       | 592.790055       | <b>8</b>  |
| 6  | <b>715.362095</b> | 358.184686        | 698.335546        | 349.671411       | 697.351530        | 349.179403       | <b>E</b> | 1115.551371       | 558.279324        | 1098.524822       | 549.766049       | 1097.540806       | 549.274041       | <b>7</b>  |
| 7  | <b>786.399209</b> | 393.703243        | <b>769.372660</b> | 385.189968       | <b>768.388644</b> | 384.697960       | <b>A</b> | 986.508778        | 493.758027        | 969.482229        | 485.244753       | 968.498213        | 484.752745       | <b>6</b>  |
| 8  | <b>915.441802</b> | <b>458.224539</b> | 898.415253        | 449.711265       | <b>897.431237</b> | 449.219257       | <b>E</b> | <b>915.471664</b> | <b>458.239470</b> | 898.445115        | 449.726196       | <b>897.461099</b> | 449.234188       | <b>5</b>  |
| 9  | 1354.667128       | <b>677.837202</b> | 1337.640579       | 669.323928       | 1336.656563       | 668.831920       | <b>Q</b> | <b>786.429071</b> | 393.718174        | <b>769.402522</b> | 385.204899       | <b>768.418506</b> | 384.712891       | <b>4</b>  |
| 10 | 1425.704242       | 713.355759        | 1408.677693       | 704.842485       | 1407.693677       | 704.350477       | <b>A</b> | <b>347.203745</b> | 174.105510        | 330.177196        | 165.592236       | <b>329.193180</b> | 165.100228       | <b>3</b>  |
| 11 | 1526.751921       | 763.879599        | 1509.725372       | 755.366324       | 1508.741356       | 754.874316       | <b>T</b> | <b>276.166631</b> | 138.586953        | 259.140082        | 130.073679       | 258.156066        | 129.581671       | <b>2</b>  |
| 12 |                   |                   |                   |                  |                   |                  | <b>R</b> | <b>175.118952</b> | 88.063114         | 158.092403        | 79.549839        |                   |                  | <b>1</b>  |

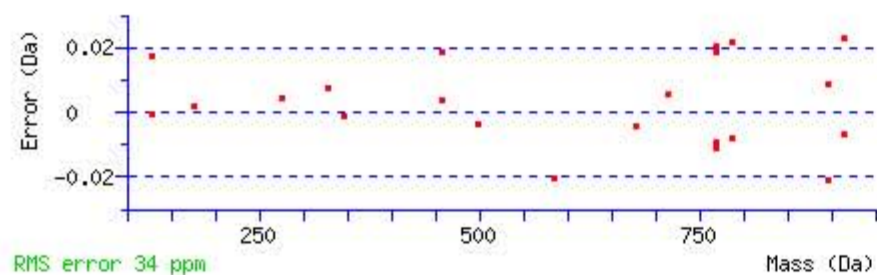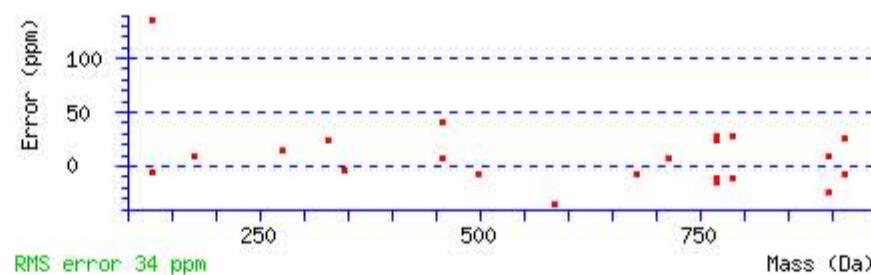

NCBI BLAST search of **KQELSEAEQATR**

(Parameters: blastp, nr protein database, expect=20000, no filter, PAM30)

Other BLAST [web gateways](#)

## All matches to this query

| Score | Mr(calc):   | Delta     | Sequence                        |
|-------|-------------|-----------|---------------------------------|
| 30.6  | 1699.856277 | -0.008415 | <a href="#">KQELSEAEQATR</a>    |
| 10.4  | 1699.856277 | -0.008415 | <a href="#">KQELSEAEQATR</a>    |
| 10.1  | 1699.845932 | 0.001930  | <a href="#">QAMQEQLSK</a>       |
| 9.5   | 1699.846405 | 0.001457  | <a href="#">HQEVKMQAPAFRDK</a>  |
| 9.4   | 1699.845932 | 0.001930  | <a href="#">QAMQEQLSK</a>       |
| 7.5   | 1699.843063 | 0.004799  | <a href="#">GKVSEGIDFVHHYGR</a> |
| 5.3   | 1699.849091 | -0.001229 | <a href="#">KIFETSIIFCGEEK</a>  |
| 0.6   | 1699.838562 | 0.009300  | <a href="#">EAPTQGLACVSTR</a>   |

# MASCOT Search Results

## Peptide View

MS/MS Fragmentation of **NEQVEIR**

Found in **CO3\_HUMAN**, Complement C3 OS=Homo sapiens GN=C3 PE=1 SV=2

Match to Query 17699: 1197.604068 from(599.809310,2+) rtinseconds(1684) index(44070)

Title: Locus:1.1.1.3299.7 File:"2013-07-02 CLN FXIII 180 min 3rd F 4.wiff"

Data file C:\Program Files (x86)\Matrix Science\Mascot Daemon\mgf9 FXIII 180 min 3rd\mascot\_daemon\_merge.mgf

Click mouse within plot area to zoom in by factor of two about that point

Or, Plot from  to  Da

Label all possible matches  Label matches used for scoring

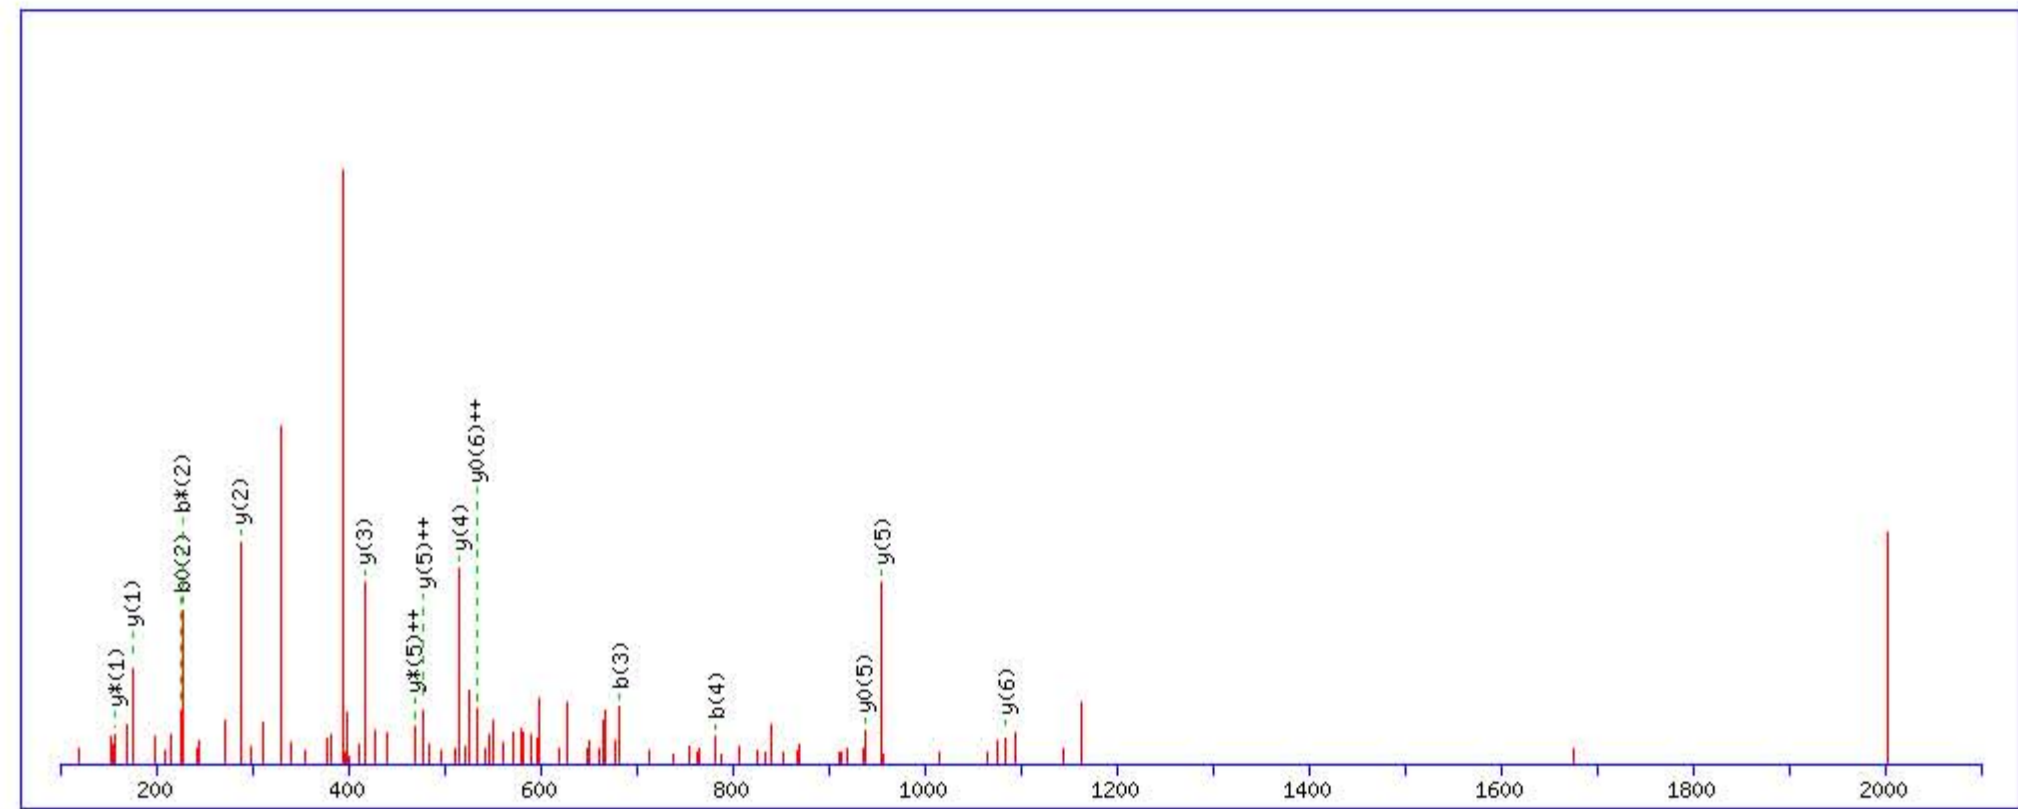

Monoisotopic mass of neutral peptide Mr(calc): 1197.617569

Fixed modifications: Carbamidomethyl (C) (apply to specified residues or termini only)

Variable modifications:

Q3 : Biotin:Thermo-21345 (Q)

Ions Score: 29 Expect: 0.014

Matches : 15/66 fragment ions using 32 most intense peaks [\(help\)](#)

| # | b                 | b <sup>++</sup> | b <sup>*</sup>    | b <sup>+++</sup> | b <sup>0</sup>    | b <sup>0++</sup> | Seq. | y                  | y <sup>++</sup>   | y <sup>*</sup>    | y <sup>+++</sup>  | y <sup>0</sup>    | y <sup>0++</sup>  | # |
|---|-------------------|-----------------|-------------------|------------------|-------------------|------------------|------|--------------------|-------------------|-------------------|-------------------|-------------------|-------------------|---|
| 1 | 115.050203        | 58.028740       | 98.023654         | 49.515465        |                   |                  | N    |                    |                   |                   |                   |                   |                   | 7 |
| 2 | 244.092796        | 122.550036      | <b>227.066247</b> | 114.036762       | <b>226.082231</b> | 113.544754       | E    | <b>1084.581942</b> | 542.794609        | 1067.555393       | 534.281335        | 1066.571377       | <b>533.789327</b> | 6 |
| 3 | <b>683.318122</b> | 342.162699      | 666.291573        | 333.649425       | 665.307557        | 333.157417       | Q    | <b>955.539349</b>  | <b>478.273313</b> | 938.512800        | <b>469.760038</b> | <b>937.528784</b> | 469.268030        | 5 |
| 4 | <b>782.386536</b> | 391.696906      | 765.359987        | 383.183632       | 764.375971        | 382.691624       | V    | <b>516.314023</b>  | 258.660650        | 499.287474        | 250.147375        | 498.303458        | 249.655367        | 4 |
| 5 | 911.429129        | 456.218203      | 894.402580        | 447.704928       | 893.418564        | 447.212920       | E    | <b>417.245609</b>  | 209.126443        | 400.219060        | 200.613168        | 399.235044        | 200.121160        | 3 |
| 6 | 1024.513193       | 512.760235      | 1007.486644       | 504.246960       | 1006.502628       | 503.754952       | I    | <b>288.203016</b>  | 144.605146        | 271.176467        | 136.091872        |                   |                   | 2 |
| 7 |                   |                 |                   |                  |                   |                  | R    | <b>175.118952</b>  | 88.063114         | <b>158.092403</b> | 79.549840         |                   |                   | 1 |

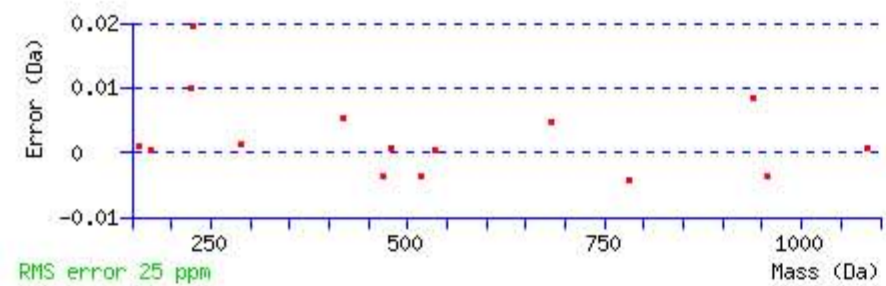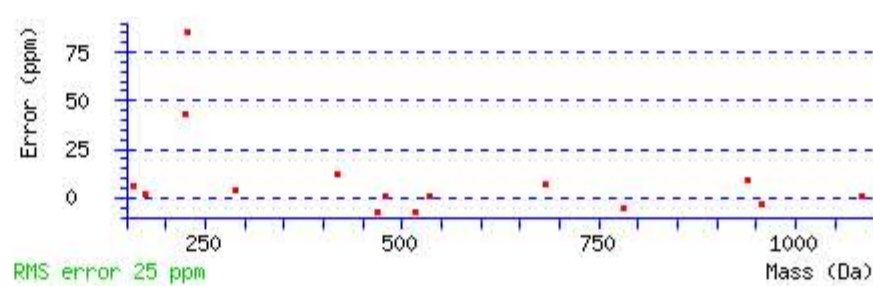

NCBI BLAST search of **NEQVEIR**

(Parameters: blastp, nr protein database, expect=20000, no filter, PAM30)

Other BLAST [web gateways](#)

All matches to this query

| Score | Mr(calc):   | Delta     | Sequence                     |
|-------|-------------|-----------|------------------------------|
| 28.5  | 1197.617569 | -0.013501 | <a href="#">NEQVEIR</a>      |
| 8.3   | 1197.598953 | 0.005115  | <a href="#">EISPGSGPGEIR</a> |
| 6.5   | 1197.598938 | 0.005130  | <a href="#">AAQEGDLPELR</a>  |
| 6.3   | 1197.617569 | -0.013501 | <a href="#">NQEDLLR</a>      |
| 4.0   | 1197.588593 | 0.015475  | <a href="#">TMLAVVDYMR</a>   |
| 3.7   | 1197.617569 | -0.013501 | <a href="#">QEVNELR</a>      |
| 3.7   | 1197.598953 | 0.005115  | <a href="#">VDNQPEELVR</a>   |
| 1.2   | 1197.589050 | 0.015018  | <a href="#">DKSGLAEHWR</a>   |
| 0.7   | 1197.617584 | -0.013516 | <a href="#">QDLQLR</a>       |
| 0.5   | 1197.598953 | 0.005115  | <a href="#">QDNLPIEVR</a>    |

Mascot: <http://www.matrixscience.com/>

# MASCOT SEARCH RESULTS

## Peptide View

MS/MS Fragmentation of **TGLQEVEVK**  
 Found in **CO3\_HUMAN**, Complement C3 OS=Homo sapiens GN=C3 PE=1 SV=2

Match to Query 20565: 1312.702108 from(657.358330,2+) rtinseconds(1823) index(30753)  
 Title: Locus:1.1.1.3298.14 File:"2013-07-02 CLN FXIII 180 min 3rd F 3.wiff"  
 Data file C:\Program Files (x86)\Matrix Science\Mascot Daemon\mgf\9 FXIII 180 min 3rd\mascot\_daemon\_merge.mgf

Click mouse within plot area to zoom in by factor of two about that point  
 Or, Plot from 100 to 1300 Da Full range  
 Label all possible matches  Label matches used for scoring

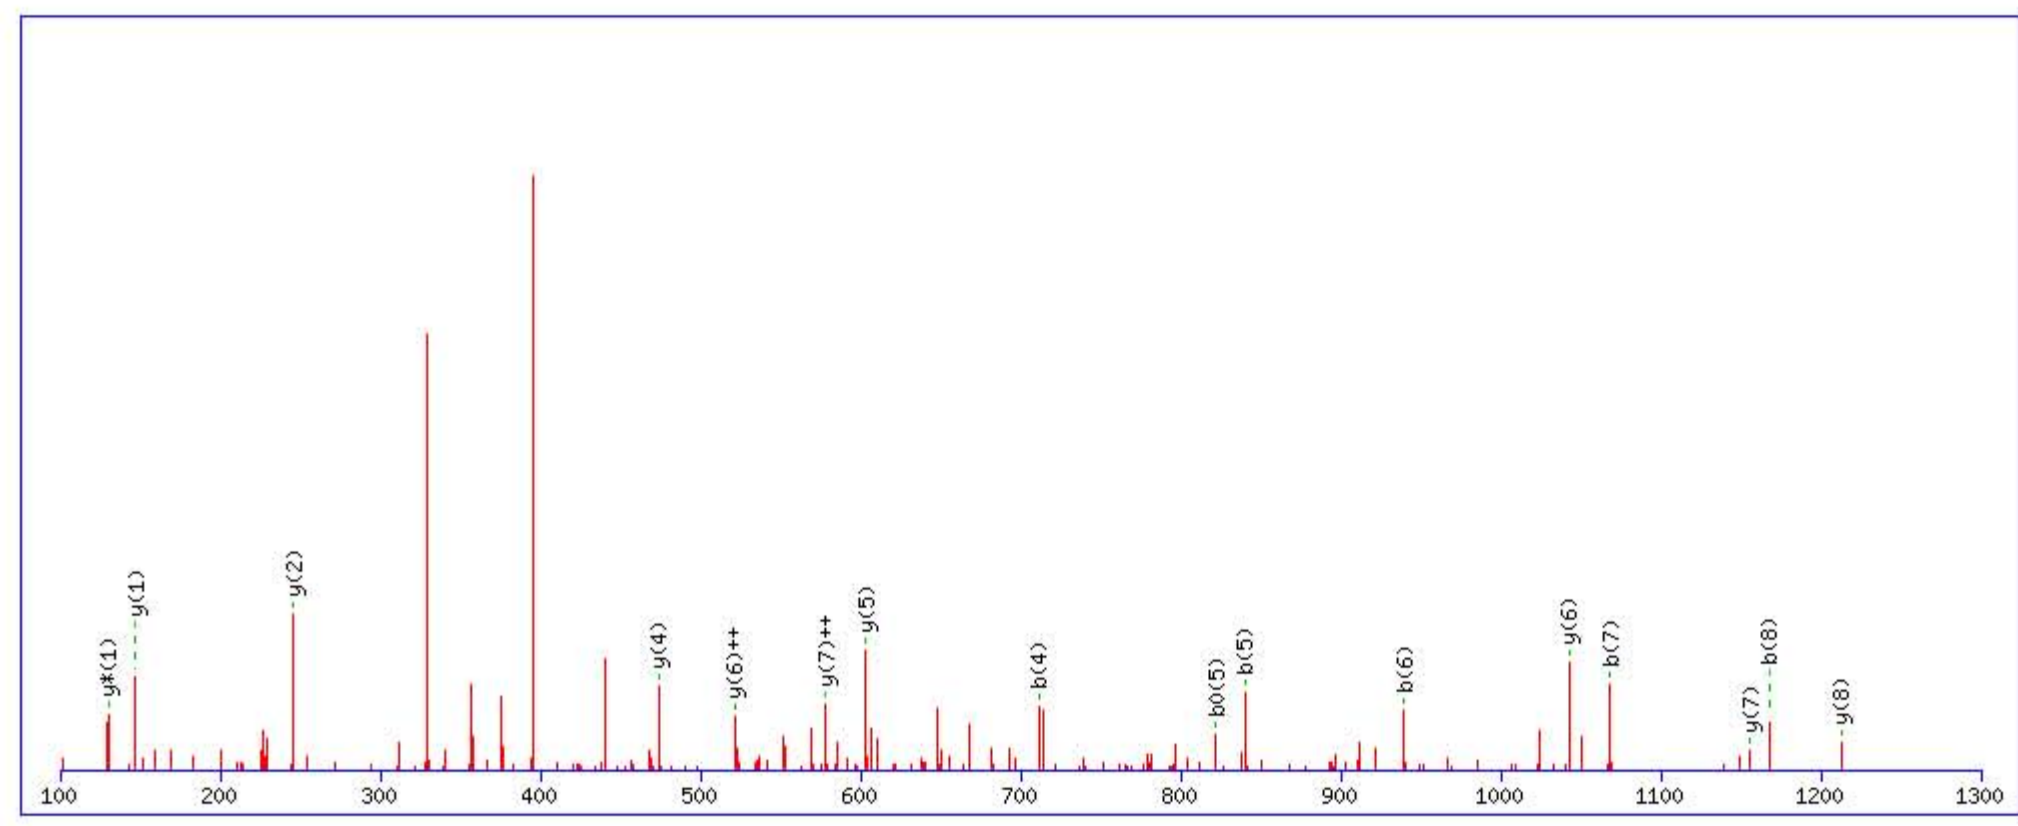

Monoisotopic mass of neutral peptide Mr(calc): 1312.706070  
 Fixed modifications: Carbamidomethyl (C) (apply to specified residues or termini only)  
 Variable modifications:  
 Q4 : Biotin:Thermo-21345 (Q)  
 Ions Score: 52 Expect: 0.00015  
 Matches : 16/86 fragment ions using 23 most intense peaks (help)

| # | b           | b <sup>++</sup> | b <sup>*</sup> | b <sup>*++</sup> | b <sup>0</sup> | b <sup>0++</sup> | Seq. | y           | y <sup>++</sup> | y <sup>*</sup> | y <sup>*++</sup> | y <sup>0</sup> | y <sup>0++</sup> | # |
|---|-------------|-----------------|----------------|------------------|----------------|------------------|------|-------------|-----------------|----------------|------------------|----------------|------------------|---|
| 1 | 102.054955  | 51.531116       |                |                  | 84.044390      | 42.525833        | T    |             |                 |                |                  |                |                  | 9 |
| 2 | 159.076419  | 80.041847       |                |                  | 141.065854     | 71.036565        | G    | 1212.665672 | 606.836474      | 1195.639123    | 598.323200       | 1194.655107    | 597.831192       | 8 |
| 3 | 272.160483  | 136.583879      |                |                  | 254.149918     | 127.578597       | L    | 1155.644208 | 578.325742      | 1138.617659    | 569.812468       | 1137.633643    | 569.320460       | 7 |
| 4 | 711.385809  | 356.196543      | 694.359260     | 347.683268       | 693.375244     | 347.191260       | Q    | 1042.560144 | 521.783710      | 1025.533595    | 513.270436       | 1024.549579    | 512.778428       | 6 |
| 5 | 840.428402  | 420.717839      | 823.401853     | 412.204565       | 822.417837     | 411.712557       | E    | 603.334818  | 302.171047      | 586.308269     | 293.657773       | 585.324253     | 293.165765       | 5 |
| 6 | 939.496816  | 470.252046      | 922.470267     | 461.738772       | 921.486251     | 461.246764       | V    | 474.292225  | 237.649751      | 457.265676     | 229.136476       | 456.281660     | 228.644468       | 4 |
| 7 | 1068.539409 | 534.773343      | 1051.512860    | 526.260068       | 1050.528844    | 525.768060       | E    | 375.223811  | 188.115544      | 358.197262     | 179.602269       | 357.213246     | 179.110261       | 3 |
| 8 | 1167.607823 | 584.307550      | 1150.581274    | 575.794275       | 1149.597258    | 575.302267       | V    | 246.181218  | 123.594247      | 229.154669     | 115.080973       |                |                  | 2 |
| 9 |             |                 |                |                  |                |                  | K    | 147.112804  | 74.060040       | 130.086255     | 65.546765        |                |                  | 1 |

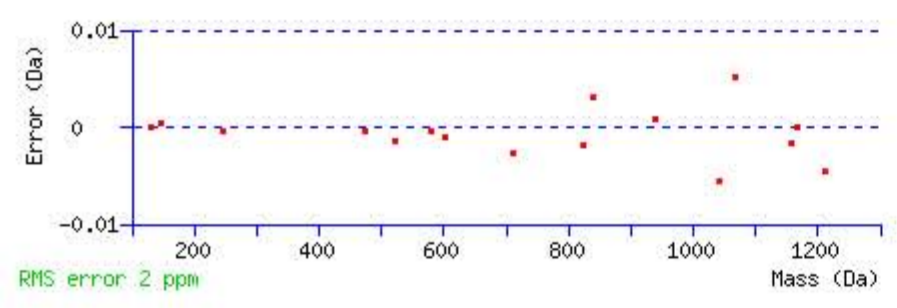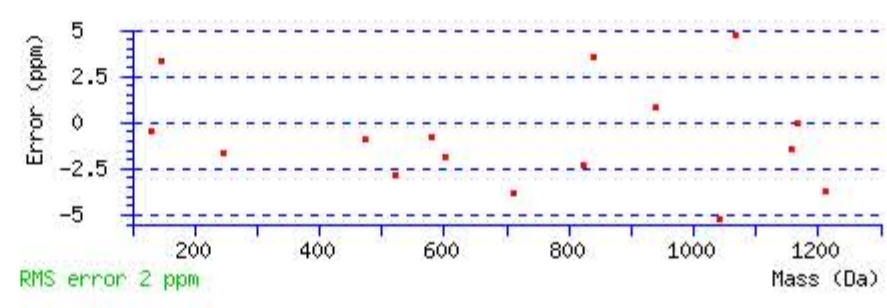

NCBI BLAST search of **TGLQEVEVK**  
 (Parameters: blastp, nr protein database, expect=20000, no filter, PAM30)  
 Other BLAST [web gateways](#)

### All matches to this query

| Score | Mr(calc):   | Delta     | Sequence                    |
|-------|-------------|-----------|-----------------------------|
| 52.1  | 1312.706070 | -0.003962 | <a href="#">TGLQEVEVK</a>   |
| 12.2  | 1312.699524 | 0.002584  | <a href="#">TIMHLMINNVK</a> |
| 11.4  | 1312.713913 | -0.011805 | <a href="#">KVFEKYTTAAR</a> |
| 7.1   | 1312.709869 | -0.007761 | <a href="#">QAEAVAKLQAR</a> |
| 6.5   | 1312.717300 | -0.015192 | <a href="#">ASLQTVDIR</a>   |
| 5.0   | 1312.692139 | 0.009969  | <a href="#">DRQSQIQK</a>    |
| 3.5   | 1312.721130 | -0.019022 | <a href="#">QVEVLTNQAR</a>  |
| 2.9   | 1312.709915 | -0.007807 | <a href="#">VKDATQITQGR</a> |
| 2.8   | 1312.721115 | -0.019007 | <a href="#">KKPQRDSQAQK</a> |
| 2.6   | 1312.703384 | -0.001276 | <a href="#">RGGSLGQTAR</a>  |

# MASCOT Search Results

## Peptide View

MS/MS Fragmentation of **VLLDGVQNPR**

Found in **CO3\_HUMAN**, Complement C3 OS=Homo sapiens GN=C3 PE=1 SV=2

Match to Query 24704: 1420.782012 from(474.601280,3+) rtinseconds(2004) index(31916)

Title: Locus:1.1.1.3361.13 File:"2013-07-02 CLN FXIII 180 min 3rd F 3.wiff"

Data file C:\Program Files (x86)\Matrix Science\Mascot Daemon\mgf9 FXIII 180 min 3rd\mascot\_daemon\_merge.mgf

Click mouse within plot area to zoom in by factor of two about that point

Or, Plot from  to  Da

Label all possible matches  Label matches used for scoring

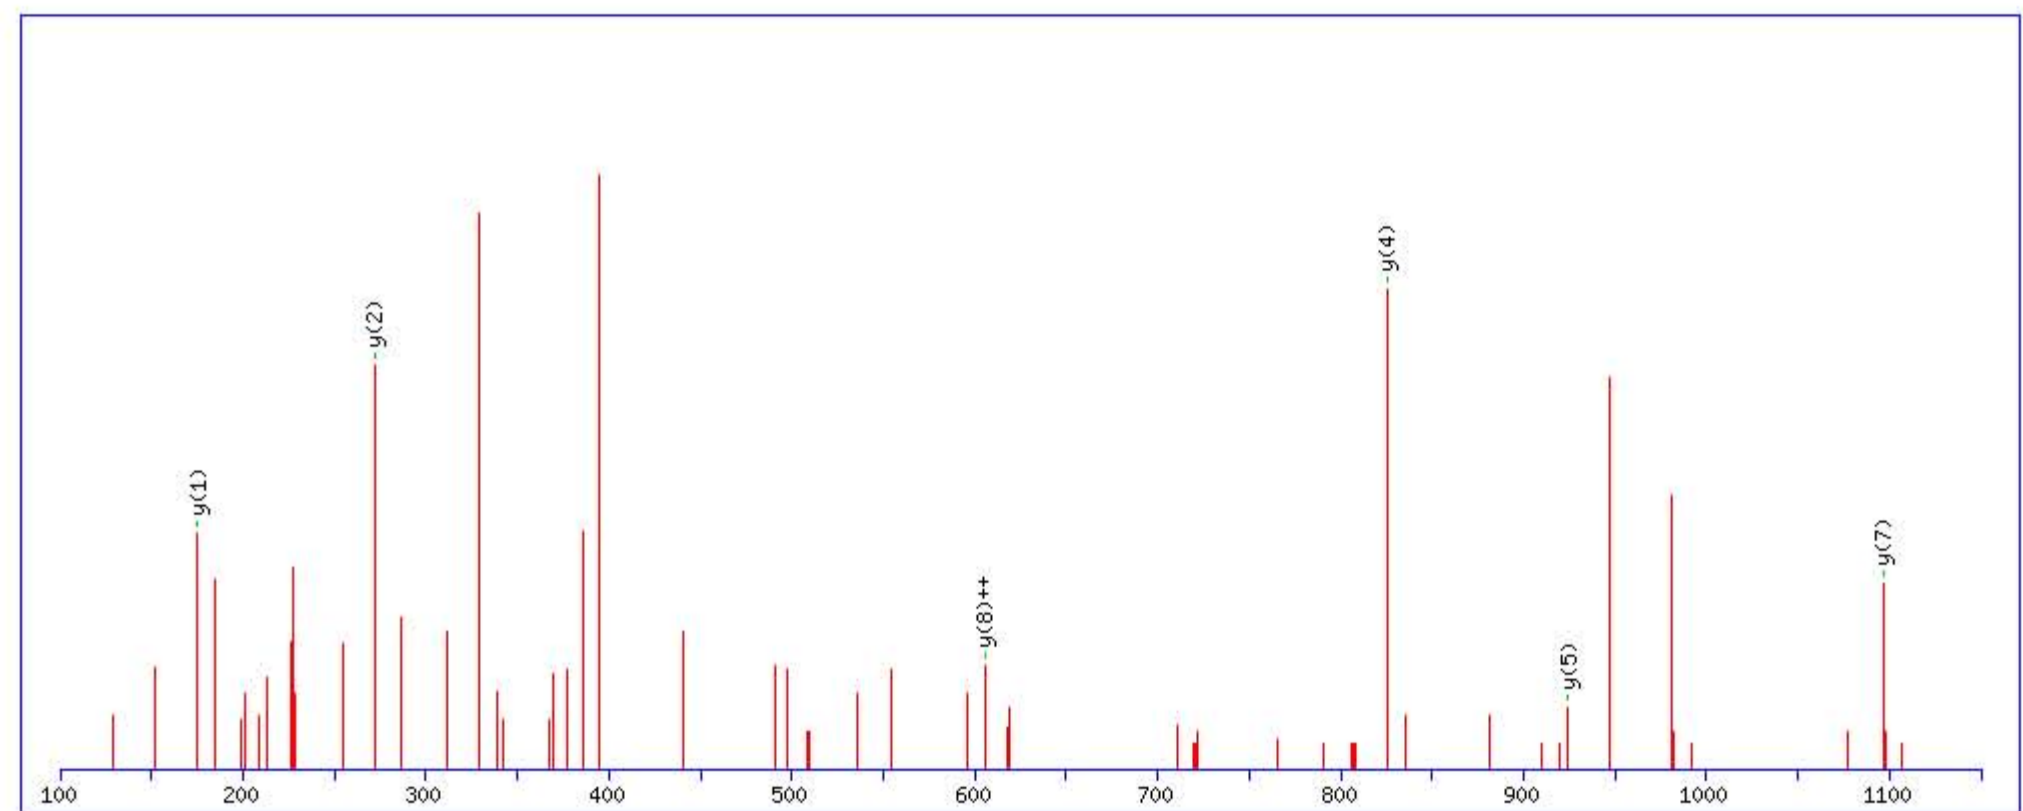

Monoisotopic mass of neutral peptide Mr(calc): 1420.786057

Fixed modifications: Carbamidomethyl (C) (apply to specified residues or termini only)

Variable modifications:

Q7 : Biotin:Thermo-21345 (Q)

Ions Score: 29 Expect: 0.0022

Matches : 6/78 fragment ions using 10 most intense peaks [\(help\)](#)

| #  | b           | b <sup>++</sup> | b <sup>*</sup> | b <sup>*++</sup> | b <sup>0</sup> | b <sup>0++</sup> | Seq. | y           | y <sup>++</sup> | y <sup>*</sup> | y <sup>*++</sup> | y <sup>0</sup> | y <sup>0++</sup> | #  |
|----|-------------|-----------------|----------------|------------------|----------------|------------------|------|-------------|-----------------|----------------|------------------|----------------|------------------|----|
| 1  | 100.075690  | 50.541483       |                |                  |                |                  | V    |             |                 |                |                  |                |                  | 10 |
| 2  | 213.159754  | 107.083515      |                |                  |                |                  | L    | 1322.724918 | 661.866097      | 1305.698369    | 653.352823       | 1304.714353    | 652.860814       | 9  |
| 3  | 326.243818  | 163.625547      |                |                  |                |                  | L    | 1209.640854 | 605.324065      | 1192.614305    | 596.810791       | 1191.630289    | 596.318783       | 8  |
| 4  | 441.270761  | 221.139018      |                |                  | 423.260196     | 212.133736       | D    | 1096.556790 | 548.782033      | 1079.530241    | 540.268758       | 1078.546225    | 539.776750       | 7  |
| 5  | 498.292225  | 249.649750      |                |                  | 480.281660     | 240.644468       | G    | 981.529847  | 491.268562      | 964.503298     | 482.755287       |                |                  | 6  |
| 6  | 597.360639  | 299.183958      |                |                  | 579.350074     | 290.178675       | V    | 924.508383  | 462.757830      | 907.481834     | 454.244555       |                |                  | 5  |
| 7  | 1036.585965 | 518.796621      | 1019.559416    | 510.283346       | 1018.575400    | 509.791338       | Q    | 825.439969  | 413.223623      | 808.413420     | 404.710348       |                |                  | 4  |
| 8  | 1150.628892 | 575.818084      | 1133.602343    | 567.304810       | 1132.618327    | 566.812801       | N    | 386.214643  | 193.610959      | 369.188094     | 185.097685       |                |                  | 3  |
| 9  | 1247.681656 | 624.344466      | 1230.655107    | 615.831192       | 1229.671091    | 615.339183       | P    | 272.171716  | 136.589496      | 255.145167     | 128.076221       |                |                  | 2  |
| 10 |             |                 |                |                  |                |                  | R    | 175.118952  | 88.063114       | 158.092403     | 79.549839        |                |                  | 1  |

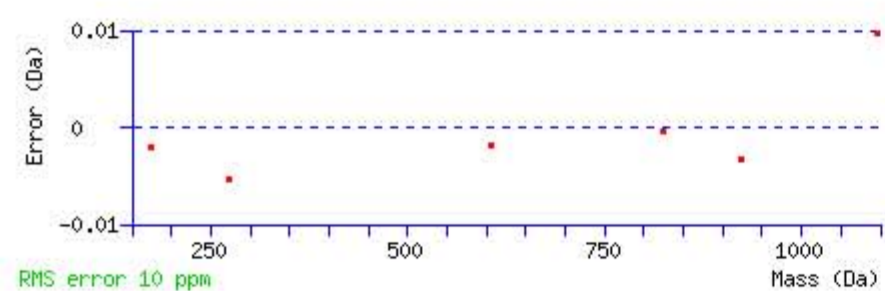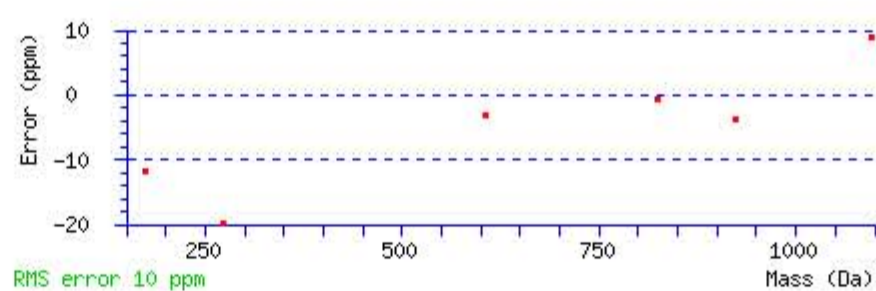

NCBI BLAST search of **VLLDGVQNPR**

(Parameters: blastp, nr protein database, expect=20000, no filter, PAM30)

Other BLAST [web gateways](#)

### All matches to this query

| Score | Mr(calc):   | Delta     | Sequence                     |
|-------|-------------|-----------|------------------------------|
| 28.8  | 1420.786057 | -0.004045 | <a href="#">VLLDGVQNPR</a>   |
| 0.6   | 1420.793915 | -0.011903 | <a href="#">TVIPLRWQPAPR</a> |

**MATRIX SCIENCE Mascot Search Results**

**Peptide View**

MS/MS Fragmentation of **HQQTVTIPPK**

Found in **CO3\_HUMAN**, Complement C3 OS=Homo sapiens GN=C3 PE=1 SV=2

Match to Query 26138: 1458.794322 from(487.272050,3+) rtinseconds(1636) index(29679)

Title: Locus:1.1.1.3233.9 File:"2013-07-02 CLN FXIII 180 min 3rd F 3.wiff"

Data file C:\Program Files (x86)\Matrix Science\Mascot Daemon\mgf\9 FXIII 180 min 3rd\mascot\_daemon\_merge.mgf

Click mouse within plot area to zoom in by factor of two about that point

Or, Plot from  to  Da

Label all possible matches  Label matches used for scoring

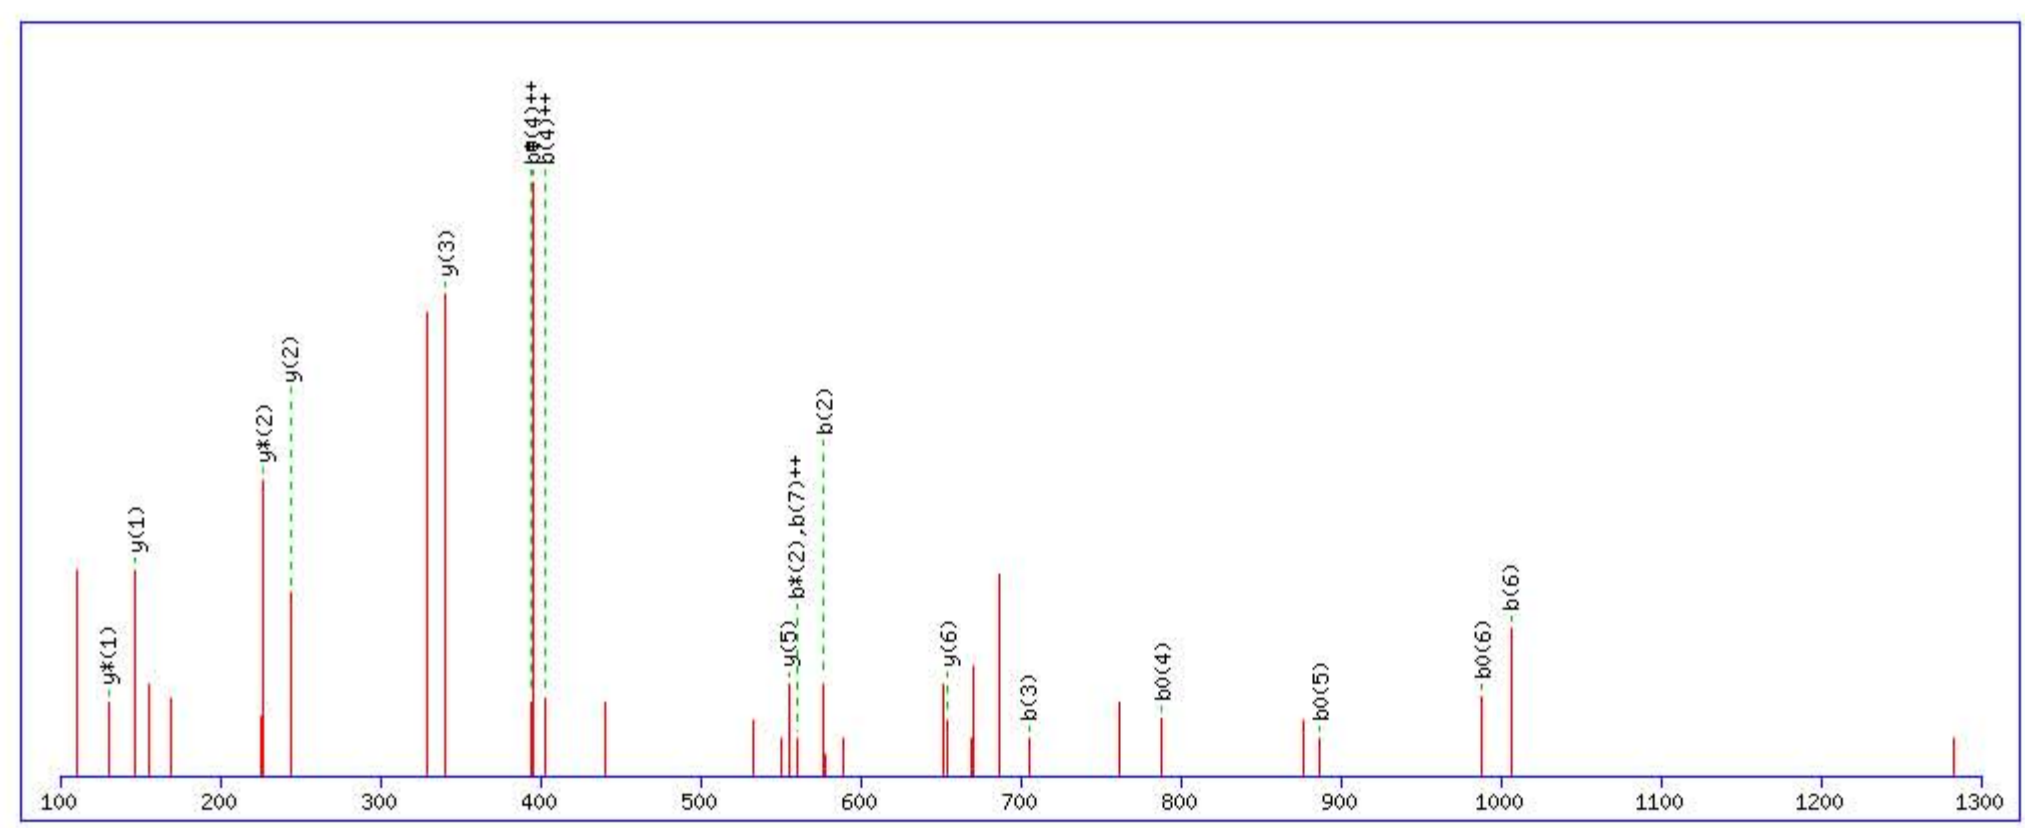

Monoisotopic mass of neutral peptide Mr(calc): 1458.801712  
 Fixed modifications: Carbamidomethyl (C) (apply to specified residues or termini only)  
 Variable modifications:  
 Q2 : Biotin:Thermo-21345 (Q)  
 Ions Score: 27 Expect: 0.0053  
 Matches : 18/92 fragment ions using 33 most intense peaks [\(help\)](#)

| #  | b                  | b <sup>++</sup>   | b <sup>*</sup>    | b <sup>*++</sup>  | b <sup>0</sup>    | b <sup>0++</sup>  | Seq. | y                 | y <sup>++</sup> | y <sup>*</sup>    | y <sup>*++</sup> | y <sup>0</sup> | y <sup>0++</sup> | #  |
|----|--------------------|-------------------|-------------------|-------------------|-------------------|-------------------|------|-------------------|-----------------|-------------------|------------------|----------------|------------------|----|
| 1  | 138.066188         | 69.536732         |                   |                   |                   |                   | H    |                   |                 |                   |                  |                |                  | 10 |
| 2  | <b>577.291514</b>  | 289.149395        | <b>560.264965</b> | 280.636121        |                   |                   | Q    | 1322.750072       | 661.878674      | 1305.723523       | 653.365400       | 1304.739507    | 652.873392       | 9  |
| 3  | <b>705.350092</b>  | 353.178684        | 688.323543        | 344.665410        |                   |                   | Q    | 883.524746        | 442.266011      | 866.498197        | 433.752737       | 865.514181     | 433.260729       | 8  |
| 4  | 806.397771         | <b>403.702524</b> | 789.371222        | <b>395.189249</b> | <b>788.387206</b> | <b>394.697241</b> | T    | 755.466168        | 378.236722      | 738.439619        | 369.723448       | 737.455603     | 369.231440       | 7  |
| 5  | 905.466185         | 453.236731        | 888.439636        | 444.723456        | <b>887.455620</b> | 444.231448        | V    | <b>654.418489</b> | 327.712883      | 637.391940        | 319.199608       | 636.407924     | 318.707600       | 6  |
| 6  | <b>1006.513864</b> | 503.760570        | 989.487315        | 495.247296        | <b>988.503299</b> | 494.755288        | T    | <b>555.350075</b> | 278.178676      | 538.323526        | 269.665401       | 537.339510     | 269.173393       | 5  |
| 7  | 1119.597928        | <b>560.302602</b> | 1102.571379       | 551.789328        | 1101.587363       | 551.297319        | I    | 454.302396        | 227.654836      | 437.275847        | 219.141561       |                |                  | 4  |
| 8  | 1216.650692        | 608.828984        | 1199.624143       | 600.315710        | 1198.640127       | 599.823701        | P    | <b>341.218332</b> | 171.112804      | 324.191783        | 162.599530       |                |                  | 3  |
| 9  | 1313.703456        | 657.355366        | 1296.676907       | 648.842092        | 1295.692891       | 648.350083        | P    | <b>244.165568</b> | 122.586422      | <b>227.139019</b> | 114.073148       |                |                  | 2  |
| 10 |                    |                   |                   |                   |                   |                   | K    | <b>147.112804</b> | 74.060040       | <b>130.086255</b> | 65.546765        |                |                  | 1  |

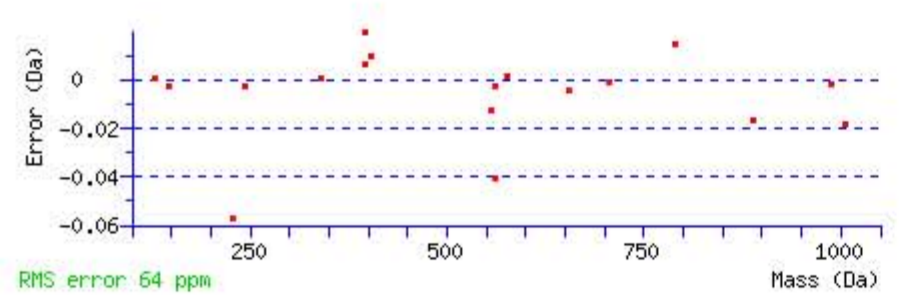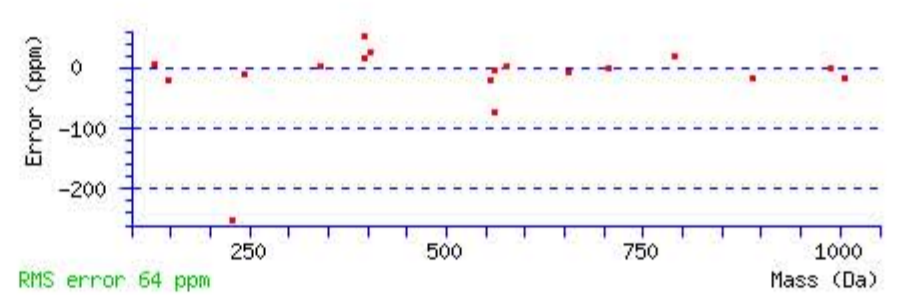

NCBI BLAST search of [HQQTVTIPPK](#)  
 (Parameters: blastp, nr protein database, expect=20000, no filter, PAM30)  
 Other BLAST [web gateways](#)

**All matches to this query**

| Score | Mr(calc):   | Delta     | Sequence                     |
|-------|-------------|-----------|------------------------------|
| 26.8  | 1458.801712 | -0.007390 | <a href="#">HQQTVTIPPK</a>   |
| 21.6  | 1458.801712 | -0.007390 | <a href="#">HQQTVTIPPK</a>   |
| 2.5   | 1458.809555 | -0.015233 | <a href="#">VIQVWFQNARAK</a> |
| 2.5   | 1458.809555 | -0.015233 | <a href="#">VLQVWFQNARAK</a> |

# MASCOT SEARCH RESULTS

## Peptide View

MS/MS Fragmentation of **HQQTVTIPP**K

Found in **CO3\_HUMAN**, Complement C3 OS=Homo sapiens GN=C3 PE=1 SV=2

Match to Query 26140: 1458.794412 from(487.272080,3+) rtinseconds(1596) index(29373)

Title: Locus:1.1.1.3219.5 File:"2013-07-02 CLN FXIII 180 min 3rd F 3.wiff"

Data file C:\Program Files (x86)\Matrix Science\Mascot Daemon\mgf\9 FXIII 180 min 3rd\mascot\_daemon\_merge.mgf

Click mouse within plot area to zoom in by factor of two about that point

Or, Plot from  to  Da

Label all possible matches  Label matches used for scoring

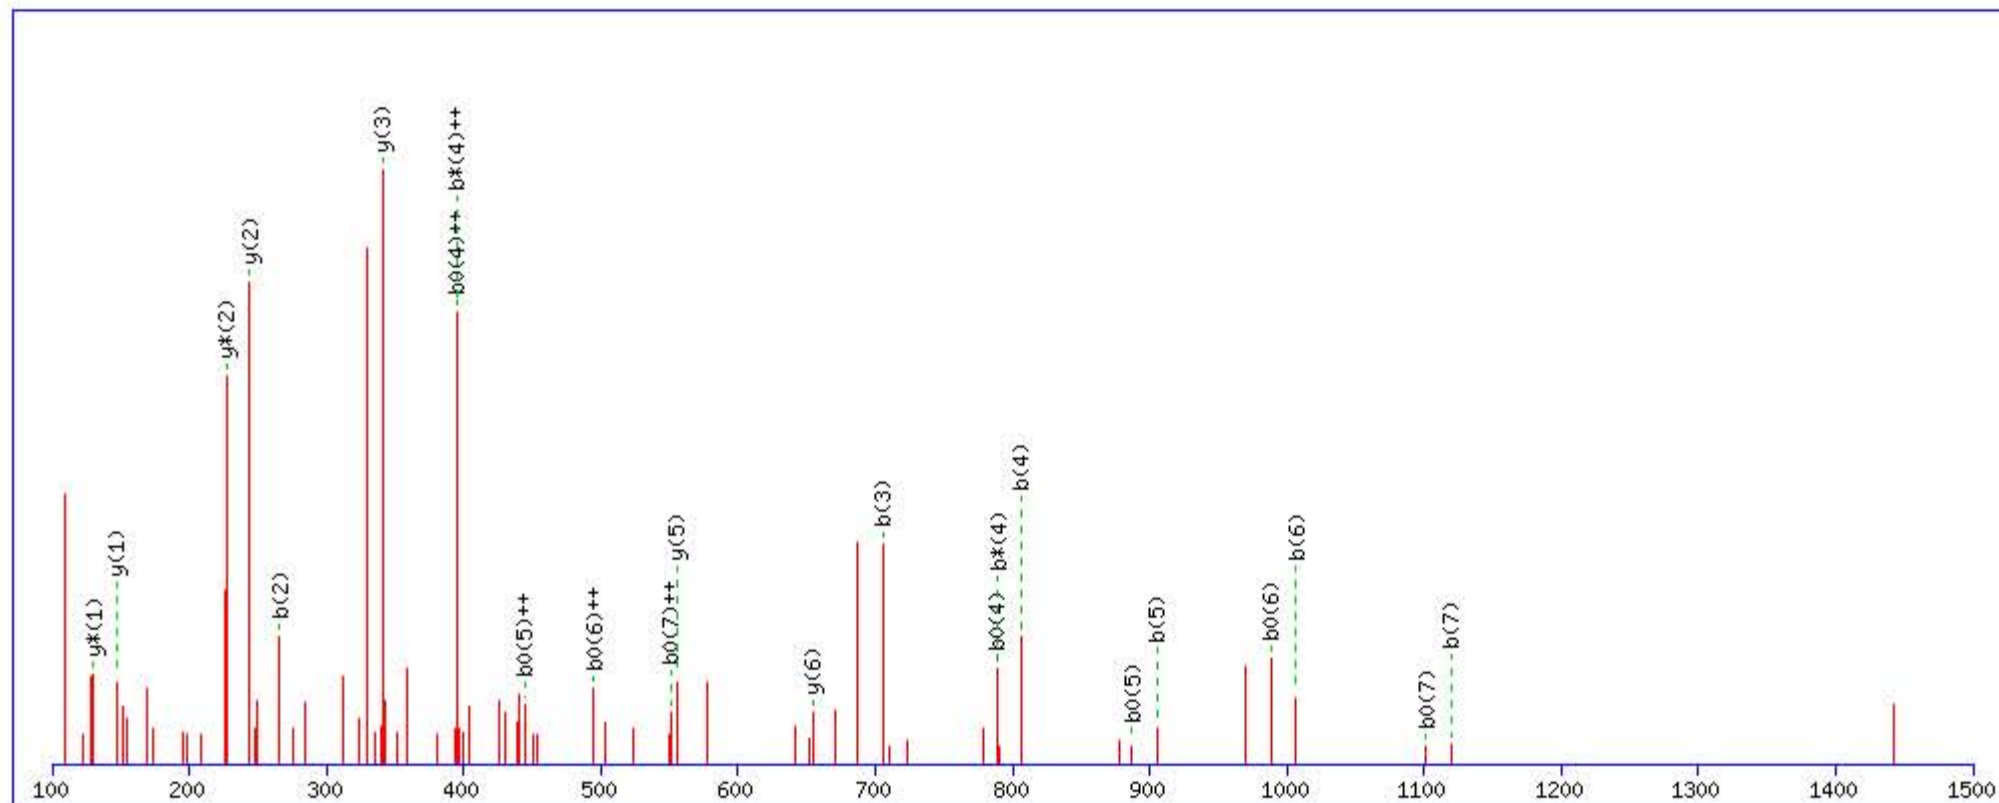

Monoisotopic mass of neutral peptide Mr(calc): 1458.801712

Fixed modifications: Carbamidomethyl (C) (apply to specified residues or termini only)

Variable modifications:

Q3 : Biotin:Thermo-21345 (Q)

Ions Score: 38 Expect: 0.0015

Matches : 23/92 fragment ions using 37 most intense peaks [\(help\)](#)

| #  | b                  | b <sup>++</sup> | b <sup>*</sup>    | b <sup>*++</sup>  | b <sup>0</sup>     | b <sup>0++</sup>  | Seq.     | y                 | y <sup>++</sup> | y <sup>*</sup>    | y <sup>*++</sup> | y <sup>0</sup> | y <sup>0++</sup> | #  |
|----|--------------------|-----------------|-------------------|-------------------|--------------------|-------------------|----------|-------------------|-----------------|-------------------|------------------|----------------|------------------|----|
| 1  | 138.066188         | 69.536732       |                   |                   |                    |                   | <b>H</b> |                   |                 |                   |                  |                |                  | 10 |
| 2  | <b>266.124766</b>  | 133.566021      | 249.098217        | 125.052746        |                    |                   | <b>Q</b> | 1322.750072       | 661.878674      | 1305.723523       | 653.365400       | 1304.739507    | 652.873392       | 9  |
| 3  | <b>705.350092</b>  | 353.178684      | 688.323543        | 344.665410        |                    |                   | <b>Q</b> | 1194.691494       | 597.849385      | 1177.664945       | 589.336111       | 1176.680929    | 588.844102       | 8  |
| 4  | <b>806.397771</b>  | 403.702524      | <b>789.371222</b> | <b>395.189249</b> | <b>788.387206</b>  | <b>394.697241</b> | <b>T</b> | 755.466168        | 378.236722      | 738.439619        | 369.723448       | 737.455603     | 369.231440       | 7  |
| 5  | <b>905.466185</b>  | 453.236731      | 888.439636        | 444.723456        | <b>887.455620</b>  | <b>444.231448</b> | <b>V</b> | <b>654.418489</b> | 327.712883      | 637.391940        | 319.199608       | 636.407924     | 318.707600       | 6  |
| 6  | <b>1006.513864</b> | 503.760570      | 989.487315        | 495.247296        | <b>988.503299</b>  | <b>494.755288</b> | <b>T</b> | <b>555.350075</b> | 278.178676      | 538.323526        | 269.665401       | 537.339510     | 269.173393       | 5  |
| 7  | <b>1119.597928</b> | 560.302602      | 1102.571379       | 551.789328        | <b>1101.587363</b> | <b>551.297319</b> | <b>I</b> | 454.302396        | 227.654836      | 437.275847        | 219.141561       |                |                  | 4  |
| 8  | 1216.650692        | 608.828984      | 1199.624143       | 600.315710        | 1198.640127        | 599.823701        | <b>P</b> | <b>341.218332</b> | 171.112804      | 324.191783        | 162.599530       |                |                  | 3  |
| 9  | 1313.703456        | 657.355366      | 1296.676907       | 648.842092        | 1295.692891        | 648.350083        | <b>P</b> | <b>244.165568</b> | 122.586422      | <b>227.139019</b> | 114.073148       |                |                  | 2  |
| 10 |                    |                 |                   |                   |                    |                   | <b>K</b> | <b>147.112804</b> | 74.060040       | <b>130.086255</b> | 65.546765        |                |                  | 1  |

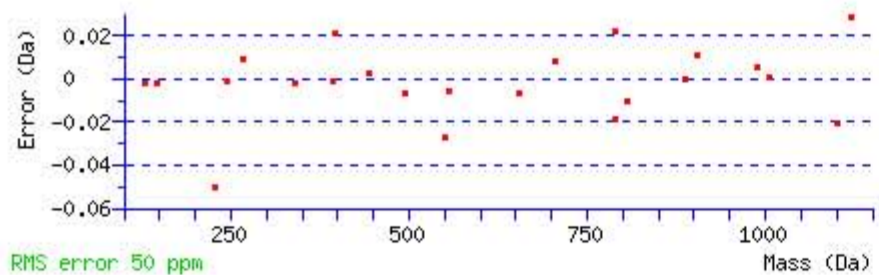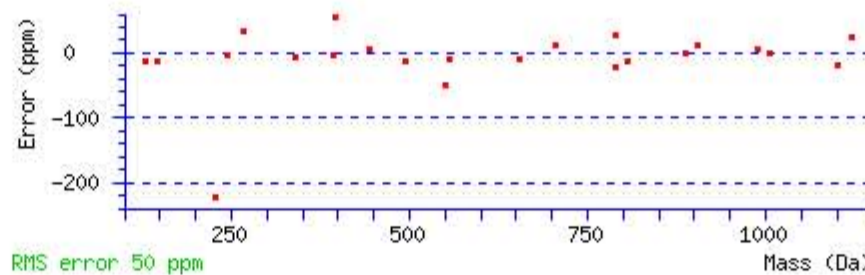

NCBI BLAST search of **HQQTVTIPP**K

(Parameters: blastp, nr protein database, expect=20000, no filter, PAM30)

Other BLAST [web gateways](#)

### All matches to this query

| Score | Mr(calc):   | Delta     | Sequence                      |
|-------|-------------|-----------|-------------------------------|
| 37.8  | 1458.801712 | -0.007300 | <a href="#">HQQTVTIPP</a> K   |
| 37.8  | 1458.801712 | -0.007300 | <a href="#">HQQTVTIPP</a> K   |
| 7.2   | 1458.776535 | 0.017877  | <a href="#">QHPADKLP</a> SR   |
| 3.3   | 1458.786392 | 0.008020  | <a href="#">EALRIAKE</a> CIEK |
| 0.9   | 1458.794281 | 0.000131  | <a href="#">EYDIPGL</a> VRKNR |



# MASCOT Search Results

## Peptide View

MS/MS Fragmentation of **AELQCPQPAAR**

Found in **CO3\_HUMAN**, Complement C3 OS=Homo sapiens GN=C3 PE=1 SV=2

Match to Query 28517: 1550.761368 from(776.387960,2+) rtinseconds(1600) index(29396)

Title: Locus:1.1.1.3220.17 File:"2013-07-02 CLN FXIII 180 min 3rd F 3.wiff"

Data file C:\Program Files (x86)\Matrix Science\Mascot Daemon\mgf9 FXIII 180 min 3rd\mascot\_daemon\_merge.mgf

Click mouse within plot area to zoom in by factor of two about that point

Or, Plot from  to  Da

Label all possible matches  Label matches used for scoring

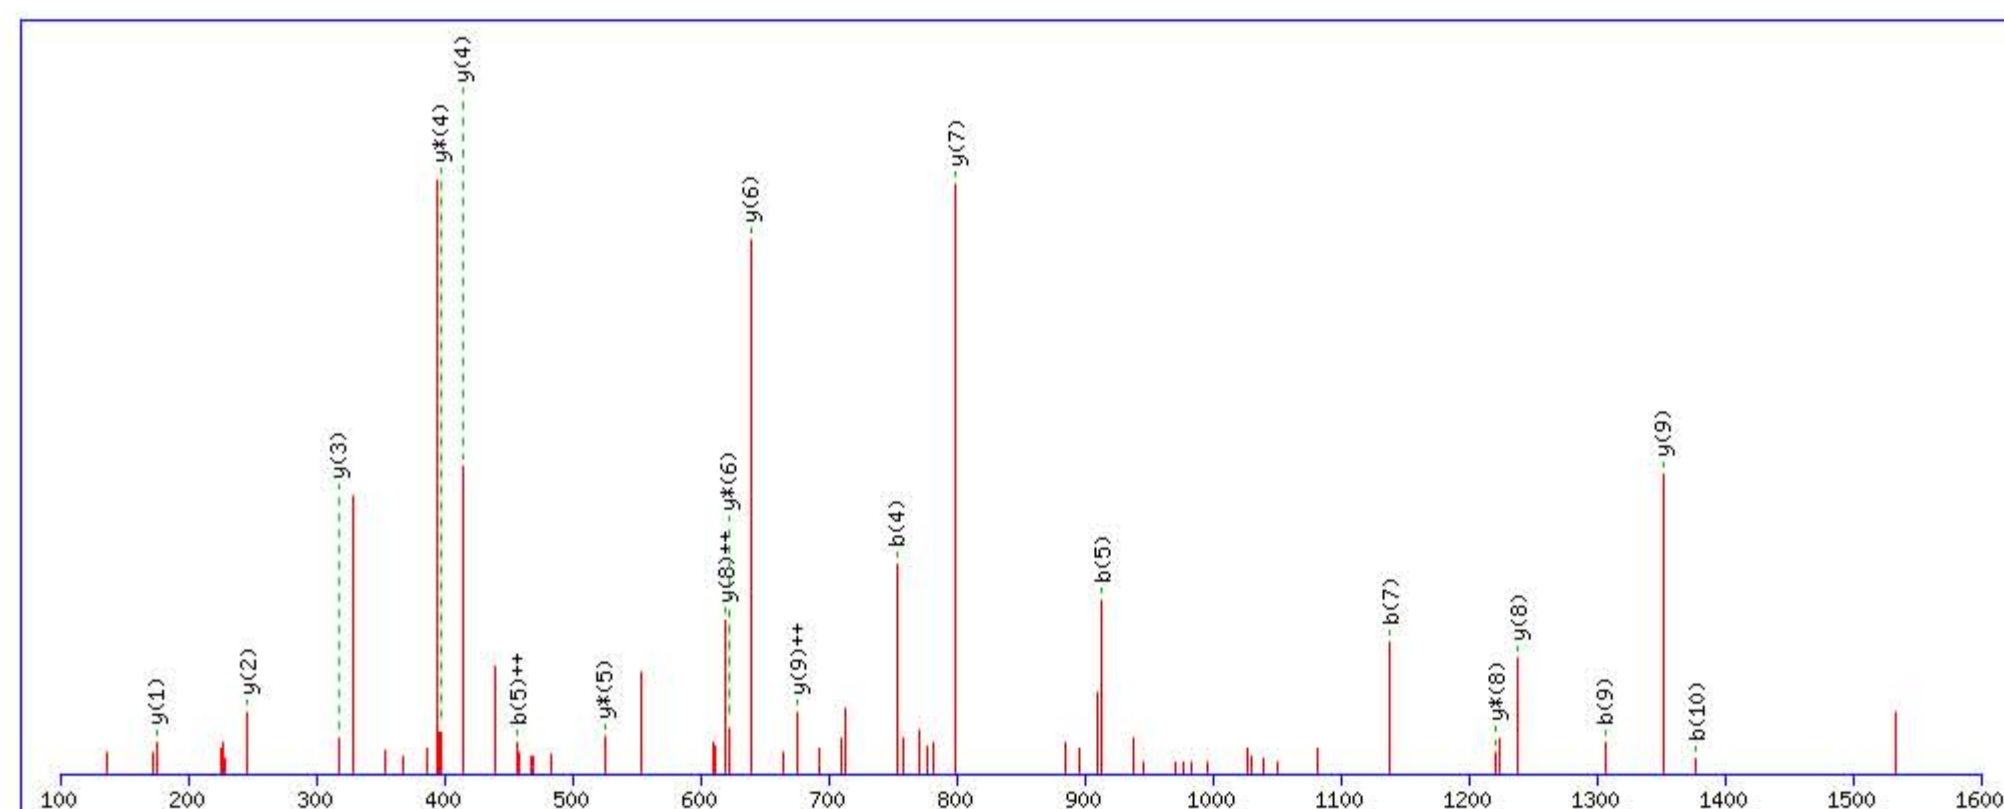

Monoisotopic mass of neutral peptide Mr(calc): 1550.769730

Fixed modifications: Carbamidomethyl (C) (apply to specified residues or termini only)

Variable modifications:

Q4 : Biotin:Thermo-21345 (Q)

Ions Score: 44 Expect: 0.00076

Matches : 20/94 fragment ions using 39 most intense peaks [\(help\)](#)

| #  | b                  | b <sup>++</sup>   | b <sup>*</sup> | b <sup>+++</sup> | b <sup>0</sup> | b <sup>0++</sup> | Seq. | y                  | y <sup>++</sup>   | y <sup>*</sup>     | y <sup>+++</sup> | y <sup>0</sup> | y <sup>0++</sup> | #  |
|----|--------------------|-------------------|----------------|------------------|----------------|------------------|------|--------------------|-------------------|--------------------|------------------|----------------|------------------|----|
| 1  | 72.044390          | 36.525833         |                |                  |                |                  | A    |                    |                   |                    |                  |                |                  | 11 |
| 2  | 201.086983         | 101.047130        |                |                  | 183.076418     | 92.041847        | E    | 1480.739918        | 740.873597        | 1463.713369        | 732.360323       | 1462.729353    | 731.868315       | 10 |
| 3  | 314.171047         | 157.589161        |                |                  | 296.160482     | 148.583879       | L    | <b>1351.697325</b> | <b>676.352301</b> | 1334.670776        | 667.839026       |                |                  | 9  |
| 4  | <b>753.396373</b>  | 377.201825        | 736.369824     | 368.688550       | 735.385808     | 368.196542       | Q    | <b>1238.613261</b> | <b>619.810269</b> | <b>1221.586712</b> | 611.296994       |                |                  | 8  |
| 5  | <b>913.427022</b>  | <b>457.217149</b> | 896.400473     | 448.703875       | 895.416457     | 448.211867       | C    | <b>799.387935</b>  | 400.197606        | 782.361386         | 391.684331       |                |                  | 7  |
| 6  | 1010.479786        | 505.743531        | 993.453237     | 497.230257       | 992.469221     | 496.738249       | P    | <b>639.357286</b>  | 320.182281        | <b>622.330737</b>  | 311.669007       |                |                  | 6  |
| 7  | <b>1138.538364</b> | 569.772820        | 1121.511815    | 561.259546       | 1120.527799    | 560.767538       | Q    | 542.304522         | 271.655899        | <b>525.277973</b>  | 263.142625       |                |                  | 5  |
| 8  | 1235.591128        | 618.299202        | 1218.564579    | 609.785928       | 1217.580563    | 609.293920       | P    | <b>414.245944</b>  | 207.626610        | <b>397.219395</b>  | 199.113335       |                |                  | 4  |
| 9  | <b>1306.628242</b> | 653.817759        | 1289.601693    | 645.304485       | 1288.617677    | 644.812477       | A    | <b>317.193180</b>  | 159.100228        | 300.166631         | 150.586953       |                |                  | 3  |
| 10 | <b>1377.665356</b> | 689.336316        | 1360.638807    | 680.823042       | 1359.654791    | 680.331034       | A    | <b>246.156066</b>  | 123.581671        | 229.129517         | 115.068396       |                |                  | 2  |
| 11 |                    |                   |                |                  |                |                  | R    | <b>175.118952</b>  | 88.063114         | 158.092403         | 79.549839        |                |                  | 1  |

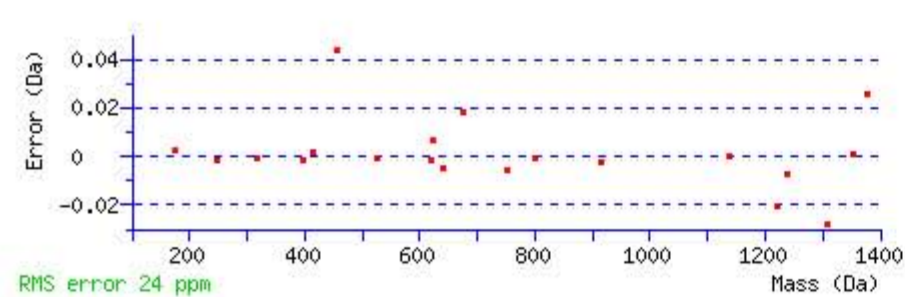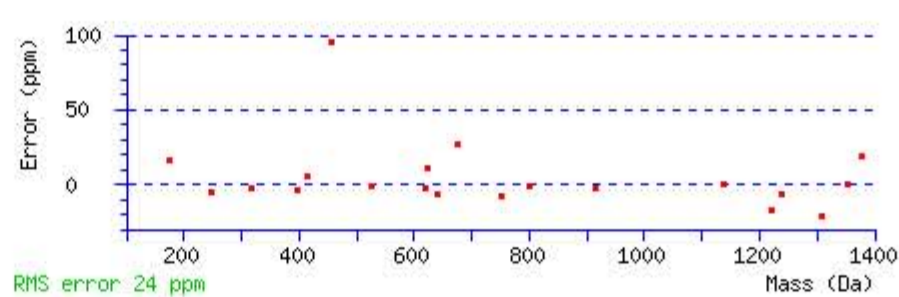

NCBI BLAST search of **AELQCPQPAAR**

(Parameters: blastp, nr protein database, expect=20000, no filter, PAM30)

Other BLAST [web gateways](#)

All matches to this query

| Score | Mr(calc):   | Delta     | Sequence                         |
|-------|-------------|-----------|----------------------------------|
| 44.4  | 1550.769730 | -0.008362 | <a href="#">AELQCPQPAAR</a>      |
| 17.5  | 1550.769730 | -0.008362 | <a href="#">AELQCPQPAAR</a>      |
| 15.4  | 1550.780945 | -0.019577 | <a href="#">EAIREHQMAR</a>       |
| 13.3  | 1550.741196 | 0.020172  | <a href="#">LWNMPENGLHAR</a>     |
| 9.4   | 1550.761856 | -0.000488 | <a href="#">MCSLMLSKELPAR</a>    |
| 7.7   | 1550.780121 | -0.018753 | <a href="#">GSSPGPRPVEGTPASR</a> |
| 6.6   | 1550.743912 | 0.017456  | <a href="#">ISGLVEGTMYYFR</a>    |
| 6.3   | 1550.780975 | -0.019607 | <a href="#">AANGQGQQR</a>        |
| 4.7   | 1550.761856 | -0.000488 | <a href="#">MCSLMLSKELPAR</a>    |
| 4.5   | 1550.768845 | -0.007477 | <a href="#">SLGKRDLIDEAER</a>    |

# MASCOT Search Results

## Peptide View

MS/MS Fragmentation of **SGSDEVQVGQQR**

Found in **CO3\_HUMAN**, Complement C3 OS=Homo sapiens GN=C3 PE=1 SV=2

Match to Query 30567: 1599.764408 from(800.889480,2+) rtinseconds(1594) index(29363)

Title: Locus:1.1.1.3218.17 File:"2013-07-02 CLN FXIII 180 min 3rd F 3.wiff"

Data file C:\Program Files (x86)\Matrix Science\Mascot Daemon\mgf\9 FXIII 180 min 3rd\mascot\_daemon\_merge.mgf

Click mouse within plot area to zoom in by factor of two about that point

Or, Plot from  to  Da

Label all possible matches  Label matches used for scoring

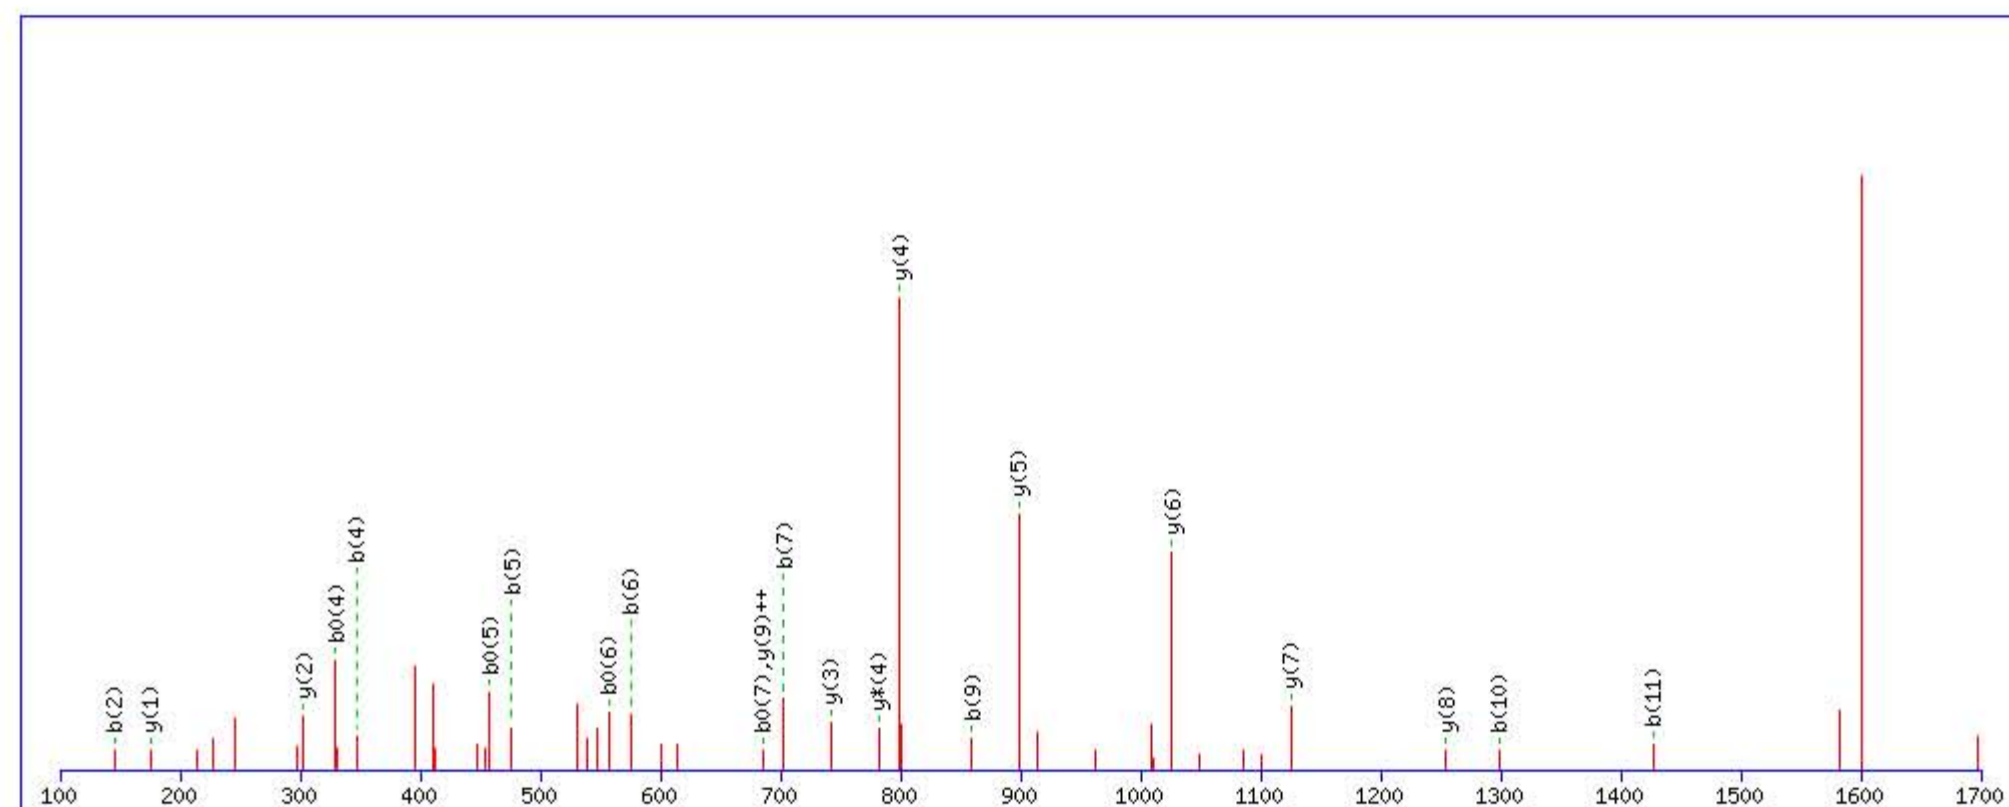

Monoisotopic mass of neutral peptide Mr(calc): 1599.767517

Fixed modifications: Carbamidomethyl (C) (apply to specified residues or termini only)

Variable modifications:

Q10 : Biotin:Thermo-21345 (Q)

Ions Score: 57 Expect: 2.7e-005

Matches : 22/106 fragment ions using 34 most intense peaks [\(help\)](#)

| #  | b                  | b <sup>++</sup> | b <sup>+</sup> | b <sup>+++</sup> | b <sup>0</sup>    | b <sup>0++</sup> | Seq. | y                  | y <sup>++</sup>   | y <sup>+</sup>    | y <sup>+++</sup> | y <sup>0</sup> | y <sup>0++</sup> | #  |
|----|--------------------|-----------------|----------------|------------------|-------------------|------------------|------|--------------------|-------------------|-------------------|------------------|----------------|------------------|----|
| 1  | 88.039304          | 44.523290       |                |                  | 70.028739         | 35.518008        | S    |                    |                   |                   |                  |                |                  | 12 |
| 2  | <b>145.060768</b>  | 73.034022       |                |                  | 127.050203        | 64.028740        | G    | 1513.742754        | 757.375015        | 1496.716205       | 748.861741       | 1495.732189    | 748.369733       | 11 |
| 3  | 232.092796         | 116.550036      |                |                  | 214.082231        | 107.544753       | S    | 1456.721290        | 728.864283        | 1439.694741       | 720.351009       | 1438.710725    | 719.859001       | 10 |
| 4  | <b>347.119739</b>  | 174.063507      |                |                  | <b>329.109174</b> | 165.058225       | D    | 1369.689262        | <b>685.348269</b> | 1352.662713       | 676.834995       | 1351.678697    | 676.342987       | 9  |
| 5  | <b>476.162332</b>  | 238.584804      |                |                  | <b>458.151767</b> | 229.579522       | E    | <b>1254.662319</b> | 627.834798        | 1237.635770       | 619.321523       | 1236.651754    | 618.829515       | 8  |
| 6  | <b>575.230746</b>  | 288.119011      |                |                  | <b>557.220181</b> | 279.113729       | V    | <b>1125.619726</b> | 563.313501        | 1108.593177       | 554.800227       |                |                  | 7  |
| 7  | <b>703.289324</b>  | 352.148300      | 686.262775     | 343.635026       | <b>685.278759</b> | 343.143018       | Q    | <b>1026.551312</b> | 513.779294        | 1009.524763       | 505.266020       |                |                  | 6  |
| 8  | 802.357738         | 401.682507      | 785.331189     | 393.169233       | 784.347173        | 392.677225       | V    | <b>898.492734</b>  | 449.750005        | 881.466185        | 441.236731       |                |                  | 5  |
| 9  | <b>859.379202</b>  | 430.193239      | 842.352653     | 421.679965       | 841.368637        | 421.187957       | G    | <b>799.424320</b>  | 400.215798        | <b>782.397771</b> | 391.702524       |                |                  | 4  |
| 10 | <b>1298.604528</b> | 649.805902      | 1281.577979    | 641.292628       | 1280.593963       | 640.800620       | Q    | <b>742.402856</b>  | 371.705066        | 725.376307        | 363.191792       |                |                  | 3  |
| 11 | <b>1426.663106</b> | 713.835191      | 1409.636557    | 705.321917       | 1408.652541       | 704.829909       | Q    | <b>303.177530</b>  | 152.092403        | 286.150981        | 143.579129       |                |                  | 2  |
| 12 |                    |                 |                |                  |                   |                  | R    | <b>175.118952</b>  | 88.063114         | 158.092403        | 79.549839        |                |                  | 1  |

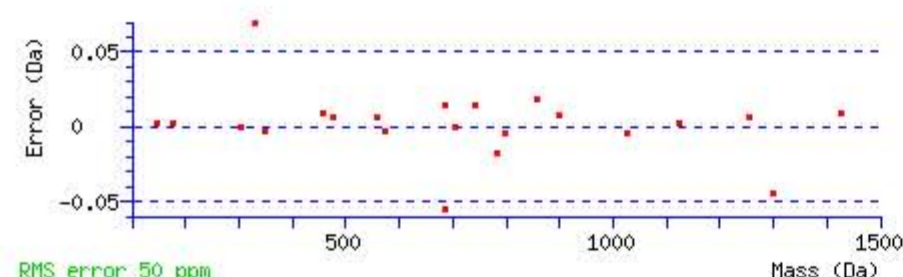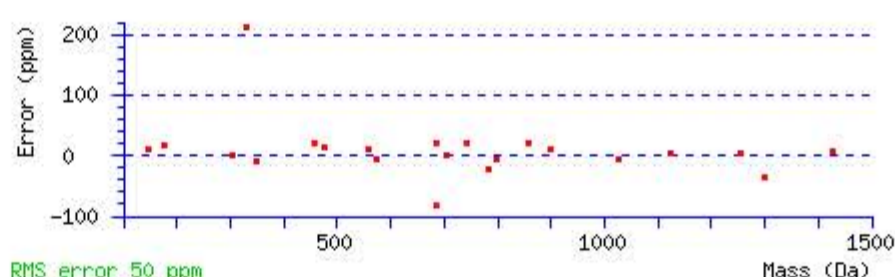

NCBI BLAST search of **SGSDEVQVGQQR**

(Parameters: blastp, nr protein database, expect=20000, no filter, PAM30)

Other BLAST [web gateways](#)

## All matches to this query

| Score | Mr(calc):   | Delta     | Sequence                        |
|-------|-------------|-----------|---------------------------------|
| 57.2  | 1599.767517 | -0.003109 | <a href="#">SGSDEVQVGQQR</a>    |
| 43.9  | 1599.767517 | -0.003109 | <a href="#">SGSDEVQVGQQR</a>    |
| 22.4  | 1599.767517 | -0.003109 | <a href="#">SGSDEVQVGQQR</a>    |
| 8.3   | 1599.785217 | -0.020809 | <a href="#">AQDLEAAQALAQSER</a> |
| 5.3   | 1599.774872 | -0.010464 | <a href="#">MAKEAIFQDTMRK</a>   |
| 1.8   | 1599.742325 | 0.022083  | <a href="#">REGDQEERDR</a>      |
| 1.1   | 1599.767471 | -0.003063 | <a href="#">AMNAANLNIPPSDTR</a> |
| 0.0   | 1599.785217 | -0.020809 | <a href="#">SELNIQNAVVENQK</a>  |

Mascot: <http://www.matrixscience.com/>

# MASCOT Search Results

## Peptide View

MS/MS Fragmentation of **SGSDEVQVGQQR**

Found in **CO3\_HUMAN**, Complement C3 OS=Homo sapiens GN=C3 PE=1 SV=2

Match to Query 30568: 1599.764428 from(800.889490,2+) rtinseconds(1585) index(29317)

Title: Locus:1.1.1.3215.14 File:"2013-07-02 CLN FXIII 180 min 3rd F 3.wiff"

Data file C:\Program Files (x86)\Matrix Science\Mascot Daemon\mgf9 FXIII 180 min 3rd\mascot\_daemon\_merge.mgf

Click mouse within plot area to zoom in by factor of two about that point

Or, Plot from  to  Da

Label all possible matches  Label matches used for scoring

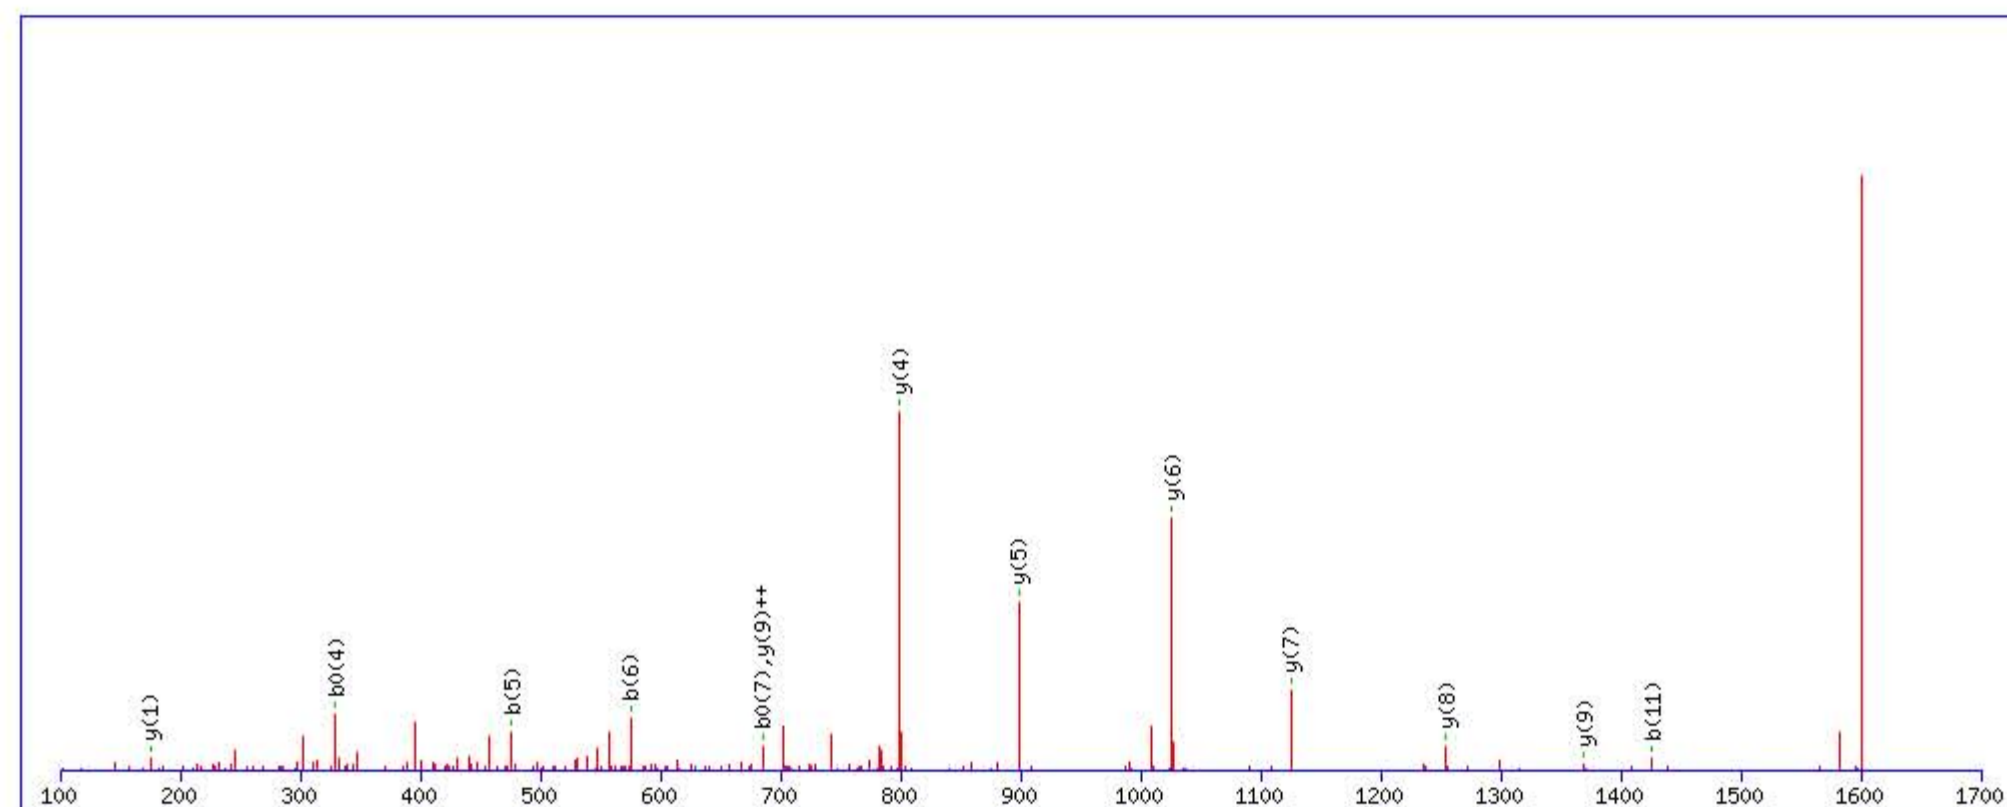

Monoisotopic mass of neutral peptide Mr(calc): 1599.767517

Fixed modifications: Carbamidomethyl (C) (apply to specified residues or termini only)

Variable modifications:

Q11 : Biotin:Thermo-21345 (Q)

Ions Score: 61 Expect: 1.2e-005

Matches : 13/106 fragment ions using 15 most intense peaks [\(help\)](#)

| #  | b           | b <sup>++</sup> | b <sup>+</sup> | b <sup>+++</sup> | b <sup>0</sup> | b <sup>0++</sup> | Seq. | y           | y <sup>++</sup> | y <sup>+</sup> | y <sup>+++</sup> | y <sup>0</sup> | y <sup>0++</sup> | #  |
|----|-------------|-----------------|----------------|------------------|----------------|------------------|------|-------------|-----------------|----------------|------------------|----------------|------------------|----|
| 1  | 88.039304   | 44.523290       |                |                  | 70.028739      | 35.518008        | S    |             |                 |                |                  |                |                  | 12 |
| 2  | 145.060768  | 73.034022       |                |                  | 127.050203     | 64.028740        | G    | 1513.742754 | 757.375015      | 1496.716205    | 748.861741       | 1495.732189    | 748.369733       | 11 |
| 3  | 232.092796  | 116.550036      |                |                  | 214.082231     | 107.544753       | S    | 1456.721290 | 728.864283      | 1439.694741    | 720.351009       | 1438.710725    | 719.859001       | 10 |
| 4  | 347.119739  | 174.063507      |                |                  | 329.109174     | 165.058225       | D    | 1369.689262 | 685.348269      | 1352.662713    | 676.834995       | 1351.678697    | 676.342987       | 9  |
| 5  | 476.162332  | 238.584804      |                |                  | 458.151767     | 229.579522       | E    | 1254.662319 | 627.834798      | 1237.635770    | 619.321523       | 1236.651754    | 618.829515       | 8  |
| 6  | 575.230746  | 288.119011      |                |                  | 557.220181     | 279.113729       | V    | 1125.619726 | 563.313501      | 1108.593177    | 554.800227       |                |                  | 7  |
| 7  | 703.289324  | 352.148300      | 686.262775     | 343.635026       | 685.278759     | 343.143018       | Q    | 1026.551312 | 513.779294      | 1009.524763    | 505.266020       |                |                  | 6  |
| 8  | 802.357738  | 401.682507      | 785.331189     | 393.169233       | 784.347173     | 392.677225       | V    | 898.492734  | 449.750005      | 881.466185     | 441.236731       |                |                  | 5  |
| 9  | 859.379202  | 430.193239      | 842.352653     | 421.679965       | 841.368637     | 421.187957       | G    | 799.424320  | 400.215798      | 782.397771     | 391.702524       |                |                  | 4  |
| 10 | 987.437780  | 494.222528      | 970.411231     | 485.709254       | 969.427215     | 485.217246       | Q    | 742.402856  | 371.705066      | 725.376307     | 363.191792       |                |                  | 3  |
| 11 | 1426.663106 | 713.835191      | 1409.636557    | 705.321917       | 1408.652541    | 704.829909       | Q    | 614.344278  | 307.675777      | 597.317729     | 299.162503       |                |                  | 2  |
| 12 |             |                 |                |                  |                |                  | R    | 175.118952  | 88.063114       | 158.092403     | 79.549839        |                |                  | 1  |

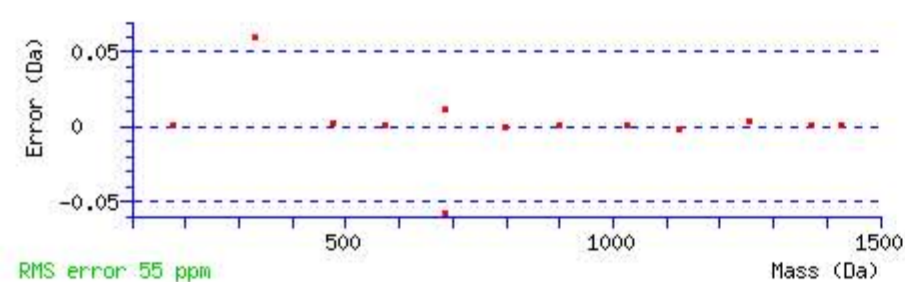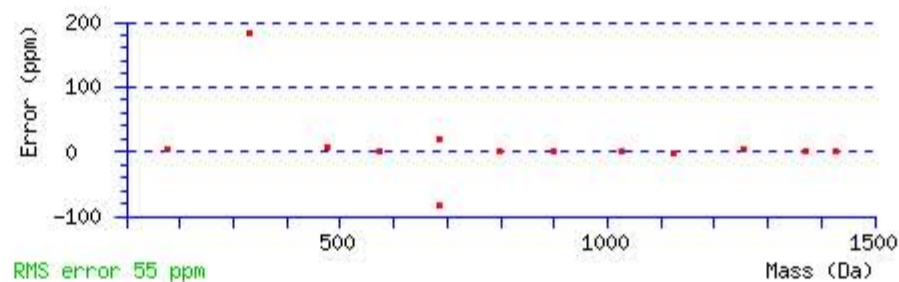

NCBI BLAST search of **SGSDEVQVGQQR**

(Parameters: blastp, nr protein database, expect=20000, no filter, PAM30)

Other BLAST [web gateways](#)

## All matches to this query

| Score | Mr(calc):   | Delta     | Sequence                        |
|-------|-------------|-----------|---------------------------------|
| 60.8  | 1599.767517 | -0.003089 | <a href="#">SGSDEVQVGQQR</a>    |
| 60.8  | 1599.767517 | -0.003089 | <a href="#">SGSDEVQVGQQR</a>    |
| 30.3  | 1599.767517 | -0.003089 | <a href="#">SGSDEVQVGQQR</a>    |
| 10.8  | 1599.767471 | -0.003043 | <a href="#">AMNAANLNIPPSDTR</a> |
| 7.1   | 1599.779388 | -0.014960 | <a href="#">RFPDFSYITQNGR</a>   |
| 6.2   | 1599.742325 | 0.022103  | <a href="#">REGDQEERDR</a>      |
| 5.4   | 1599.767502 | -0.003074 | <a href="#">LHMLSSVDLNGQDR</a>  |
| 0.8   | 1599.761612 | 0.002816  | <a href="#">MNNKAGSFFWNLR</a>   |

# MASCOT SCIENCE Mascot Search Results

## Peptide View

MS/MS Fragmentation of **CAEENCFIQK**

Found in **CO3\_HUMAN**, Complement C3 OS=Homo sapiens GN=C3 PE=1 SV=2

Match to Query 30816: 1608.706268 from(805.360410,2+) rtinseconds(1811) index(30678)

Title: Locus:1.1.1.3294.12 File:"2013-07-02 CLN FXIII 180 min 3rd F 3.wiff"

Data file C:\Program Files (x86)\Matrix Science\Mascot Daemon\mgf\9 FXIII 180 min 3rd\mascot\_daemon\_merge.mgf

Click mouse within plot area to zoom in by factor of two about that point

Or, Plot from  to  Da

Label all possible matches  Label matches used for scoring

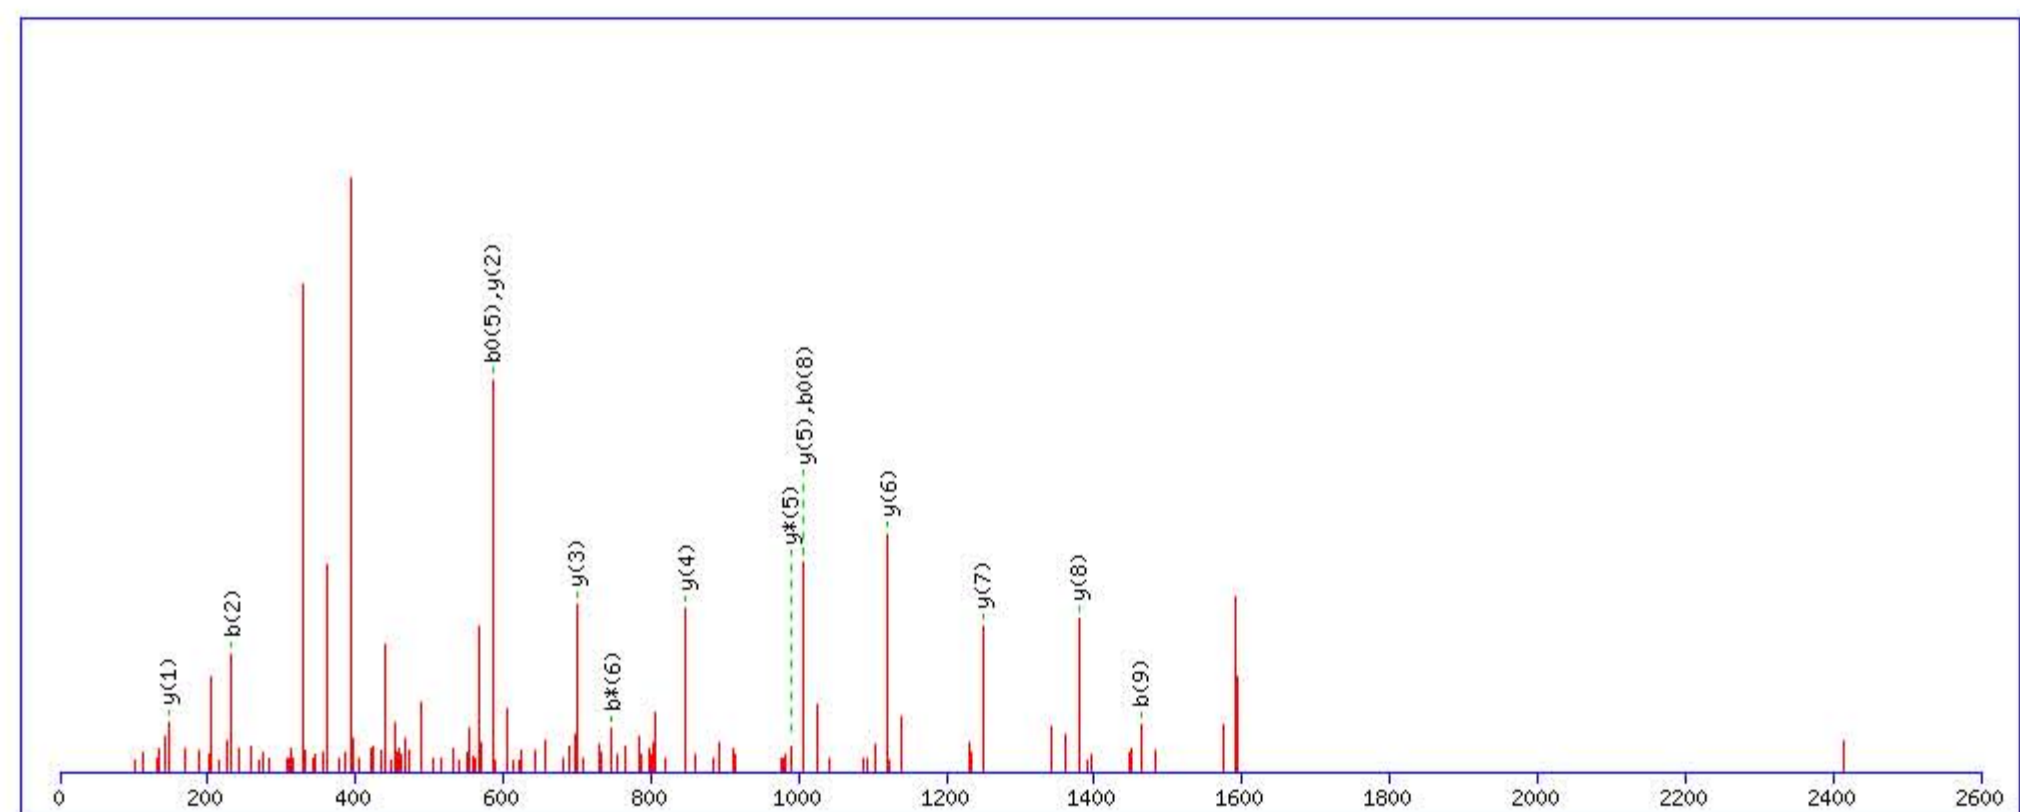

Monoisotopic mass of neutral peptide Mr(calc): 1608.709839

Fixed modifications: Carbamidomethyl (C) (apply to specified residues or termini only)

Variable modifications:

Q9 : Biotin:Thermo-21345 (Q)

Ions Score: 70 Expect: 5.3e-007

Matches : 14/84 fragment ions using 15 most intense peaks [\(help\)](#)

| #  | b                  | b <sup>++</sup> | b <sup>*</sup>    | b <sup>*++</sup> | b <sup>0</sup>     | b <sup>0++</sup> | Seq. | y                  | y <sup>++</sup> | y <sup>*</sup>    | y <sup>*++</sup> | y <sup>0</sup> | y <sup>0++</sup> | #  |
|----|--------------------|-----------------|-------------------|------------------|--------------------|------------------|------|--------------------|-----------------|-------------------|------------------|----------------|------------------|----|
| 1  | 161.037925         | 81.022600       |                   |                  |                    |                  | C    |                    |                 |                   |                  |                |                  | 10 |
| 2  | <b>232.075039</b>  | 116.541158      |                   |                  |                    |                  | A    | 1449.686484        | 725.346880      | 1432.659935       | 716.833606       | 1431.675919    | 716.341598       | 9  |
| 3  | 361.117632         | 181.062454      |                   |                  | 343.107067         | 172.057172       | E    | <b>1378.649370</b> | 689.828323      | 1361.622821       | 681.315049       | 1360.638805    | 680.823041       | 8  |
| 4  | 490.160225         | 245.583751      |                   |                  | 472.149660         | 236.578468       | E    | <b>1249.606777</b> | 625.307027      | 1232.580228       | 616.793752       | 1231.596212    | 616.301744       | 7  |
| 5  | 604.203152         | 302.605214      | 587.176603        | 294.091940       | <b>586.192587</b>  | 293.599932       | N    | <b>1120.564184</b> | 560.785730      | 1103.537635       | 552.272456       |                |                  | 6  |
| 6  | 764.233801         | 382.620539      | <b>747.207252</b> | 374.107264       | 746.223236         | 373.615256       | C    | <b>1006.521257</b> | 503.764267      | <b>989.494708</b> | 495.250992       |                |                  | 5  |
| 7  | 911.302215         | 456.154746      | 894.275666        | 447.641471       | 893.291650         | 447.149463       | F    | <b>846.490608</b>  | 423.748942      | 829.464059        | 415.235668       |                |                  | 4  |
| 8  | 1024.386279        | 512.696777      | 1007.359730       | 504.183503       | <b>1006.375714</b> | 503.691495       | I    | <b>699.422194</b>  | 350.214735      | 682.395645        | 341.701461       |                |                  | 3  |
| 9  | <b>1463.611605</b> | 732.309441      | 1446.585056       | 723.796166       | 1445.601040        | 723.304158       | Q    | <b>586.338130</b>  | 293.672703      | 569.311581        | 285.159429       |                |                  | 2  |
| 10 |                    |                 |                   |                  |                    |                  | K    | <b>147.112804</b>  | 74.060040       | 130.086255        | 65.546765        |                |                  | 1  |

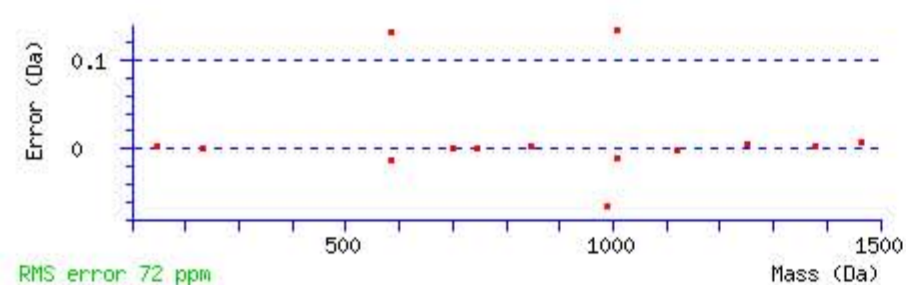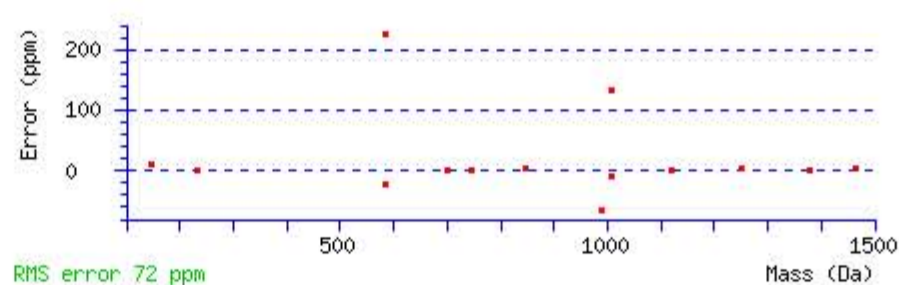

NCBI BLAST search of [CAEENCFIQK](#)

(Parameters: blastp, nr protein database, expect=20000, no filter, PAM30)

Other BLAST [web gateways](#)

All matches to this query

| Score | Mr(calc):   | Delta     | Sequence                          |
|-------|-------------|-----------|-----------------------------------|
| 70.4  | 1608.709839 | -0.003571 | <a href="#">CAEENCFIQK</a>        |
| 9.2   | 1608.721085 | -0.014817 | <a href="#">CNECGKGFAQK</a>       |
| 3.7   | 1608.704941 | 0.001327  | <a href="#">MAEAASGAGGTSLEGER</a> |
| 3.5   | 1608.723602 | -0.017334 | <a href="#">CAQAQTGIDLSGCTK</a>   |

Mascot: <http://www.matrixscience.com/>

# MASCOT Search Results

## Peptide View

MS/MS Fragmentation of **HQQTVTIPPK**

Found in **CO3\_HUMAN**, Complement C3 OS=Homo sapiens GN=C3 PE=1 SV=2

Match to Query 35116: 1769.961462 from(590.994430,3+) rtinseconds(1951) index(31478)

Title: Locus:1.1.1.3343.8 File:"2013-07-02 CLN FXIII 180 min 3rd F 3.wiff"

Data file C:\Program Files (x86)\Matrix Science\Mascot Daemon\mgf9 FXIII 180 min 3rd\mascot\_daemon\_merge.mgf

Click mouse within plot area to zoom in by factor of two about that point

Or, Plot from  to  Da

Label all possible matches  Label matches used for scoring

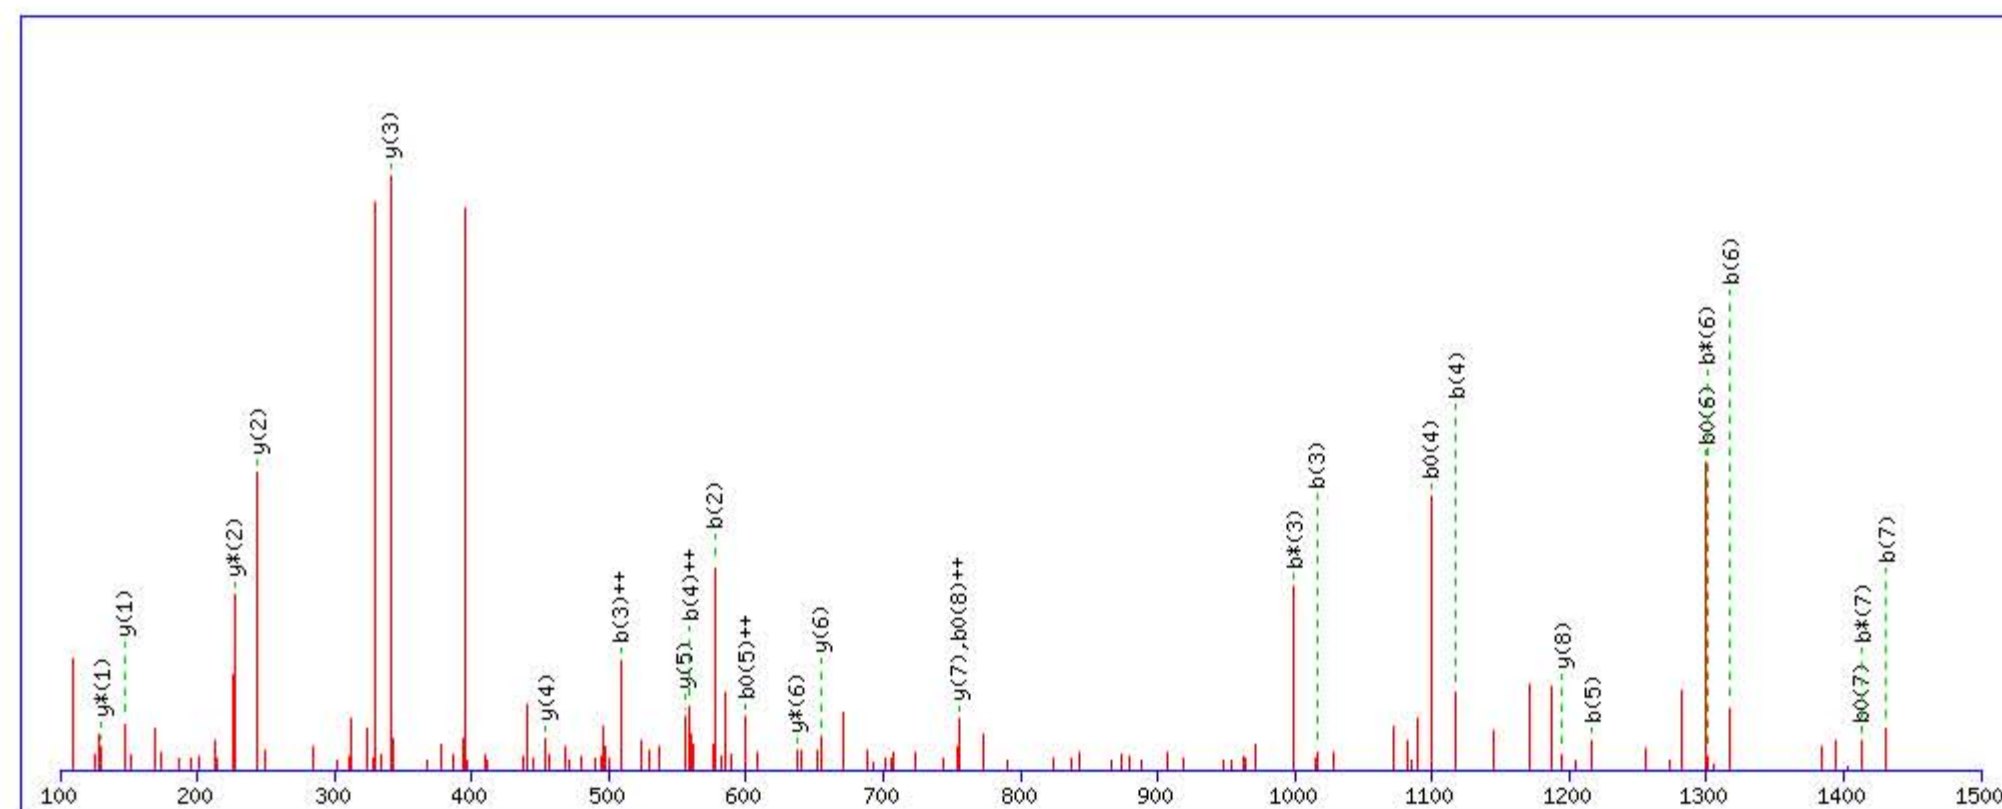

Monoisotopic mass of neutral peptide  $M_r(\text{calc})$ : 1769.968460

Fixed modifications: Carbamidomethyl (C) (apply to specified residues or termini only)

Variable modifications:

Q2 : Biotin:Thermo-21345 (Q)

Q3 : Biotin:Thermo-21345 (Q)

Ions Score: 27 Expect: 0.0031

Matches : 27/92 fragment ions using 67 most intense peaks [\(help\)](#)

| #  | b                  | b <sup>++</sup>   | b <sup>*</sup>     | b <sup>*++</sup> | b <sup>0</sup>     | b <sup>0++</sup>  | Seq. | y                  | y <sup>++</sup> | y <sup>*</sup>    | y <sup>*++</sup> | y <sup>0</sup> | y <sup>0++</sup> | #  |
|----|--------------------|-------------------|--------------------|------------------|--------------------|-------------------|------|--------------------|-----------------|-------------------|------------------|----------------|------------------|----|
| 1  | 138.066188         | 69.536732         |                    |                  |                    |                   | H    |                    |                 |                   |                  |                |                  | 10 |
| 2  | <b>577.291514</b>  | 289.149395        | 560.264965         | 280.636121       |                    |                   | Q    | 1633.916820        | 817.462048      | 1616.890271       | 808.948774       | 1615.906255    | 808.456766       | 9  |
| 3  | <b>1016.516840</b> | <b>508.762058</b> | <b>999.490291</b>  | 500.248784       |                    |                   | Q    | <b>1194.691494</b> | 597.849385      | 1177.664945       | 589.336111       | 1176.680929    | 588.844103       | 8  |
| 4  | <b>1117.564519</b> | <b>559.285898</b> | 1100.537970        | 550.772623       | <b>1099.553954</b> | 550.280615        | T    | <b>755.466168</b>  | 378.236722      | 738.439619        | 369.723448       | 737.455603     | 369.231440       | 7  |
| 5  | <b>1216.632933</b> | 608.820105        | 1199.606384        | 600.306830       | 1198.622368        | <b>599.814822</b> | V    | <b>654.418489</b>  | 327.712883      | <b>637.391940</b> | 319.199608       | 636.407924     | 318.707600       | 6  |
| 6  | <b>1317.680612</b> | 659.343944        | <b>1300.654063</b> | 650.830670       | <b>1299.670047</b> | 650.338662        | T    | <b>555.350075</b>  | 278.178676      | 538.323526        | 269.665401       | 537.339510     | 269.173393       | 5  |
| 7  | <b>1430.764676</b> | 715.885976        | <b>1413.738127</b> | 707.372702       | <b>1412.754111</b> | 706.880694        | I    | <b>454.302396</b>  | 227.654836      | 437.275847        | 219.141561       |                |                  | 4  |
| 8  | 1527.817440        | 764.412358        | 1510.790891        | 755.899084       | 1509.806875        | <b>755.407076</b> | P    | <b>341.218332</b>  | 171.112804      | 324.191783        | 162.599530       |                |                  | 3  |
| 9  | 1624.870204        | 812.938740        | 1607.843655        | 804.425466       | 1606.859639        | 803.933458        | P    | <b>244.165568</b>  | 122.586422      | <b>227.139019</b> | 114.073148       |                |                  | 2  |
| 10 |                    |                   |                    |                  |                    |                   | K    | <b>147.112804</b>  | 74.060040       | <b>130.086255</b> | 65.546765        |                |                  | 1  |

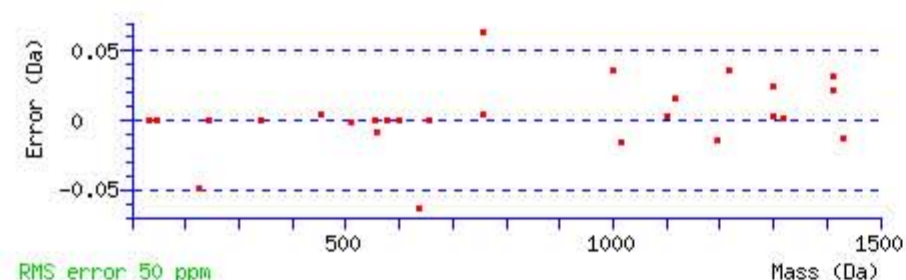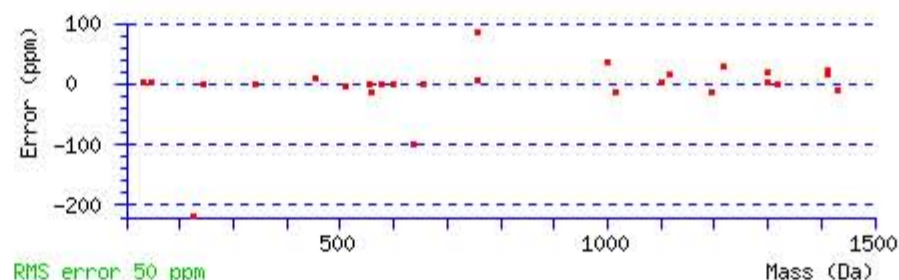

NCBI BLAST search of [HQQTVTIPPK](#)

(Parameters: blastp, nr protein database, expect=20000, no filter, PAM30)

Other BLAST [web gateways](#)

All matches to this query

| Score | $M_r(\text{calc})$ : | Delta     | Sequence                        |
|-------|----------------------|-----------|---------------------------------|
| 27.1  | 1769.968460          | -0.006998 | <a href="#">HQQTVTIPPK</a>      |
| 0.4   | 1769.961029          | 0.000433  | <a href="#">WMLSRDRASTLPLPK</a> |

Mascot: <http://www.matrixscience.com/>

# MATRIX SCIENCE Mascot Search Results

## Peptide View

MS/MS Fragmentation of **GQGTL SVVTMYHAK**

Found in **CO3\_HUMAN**, Complement C3 OS=Homo sapiens GN=C3 PE=1 SV=2

Match to Query 36116: 1817.910462 from(606.977430,3+) rtinseconds(1857) index(30889)

Title: Locus:1.1.1.3310.9 File:"2013-07-02 CLN FXIII 180 min 3rd F 3.wiff"

Data file C:\Program Files (x86)\Matrix Science\Mascot Daemon\mgf\9 FXIII 180 min 3rd\mascot\_daemon\_merge.mgf

Click mouse within plot area to zoom in by factor of two about that point

Or, Plot from  to  Da

Label all possible matches  Label matches used for scoring

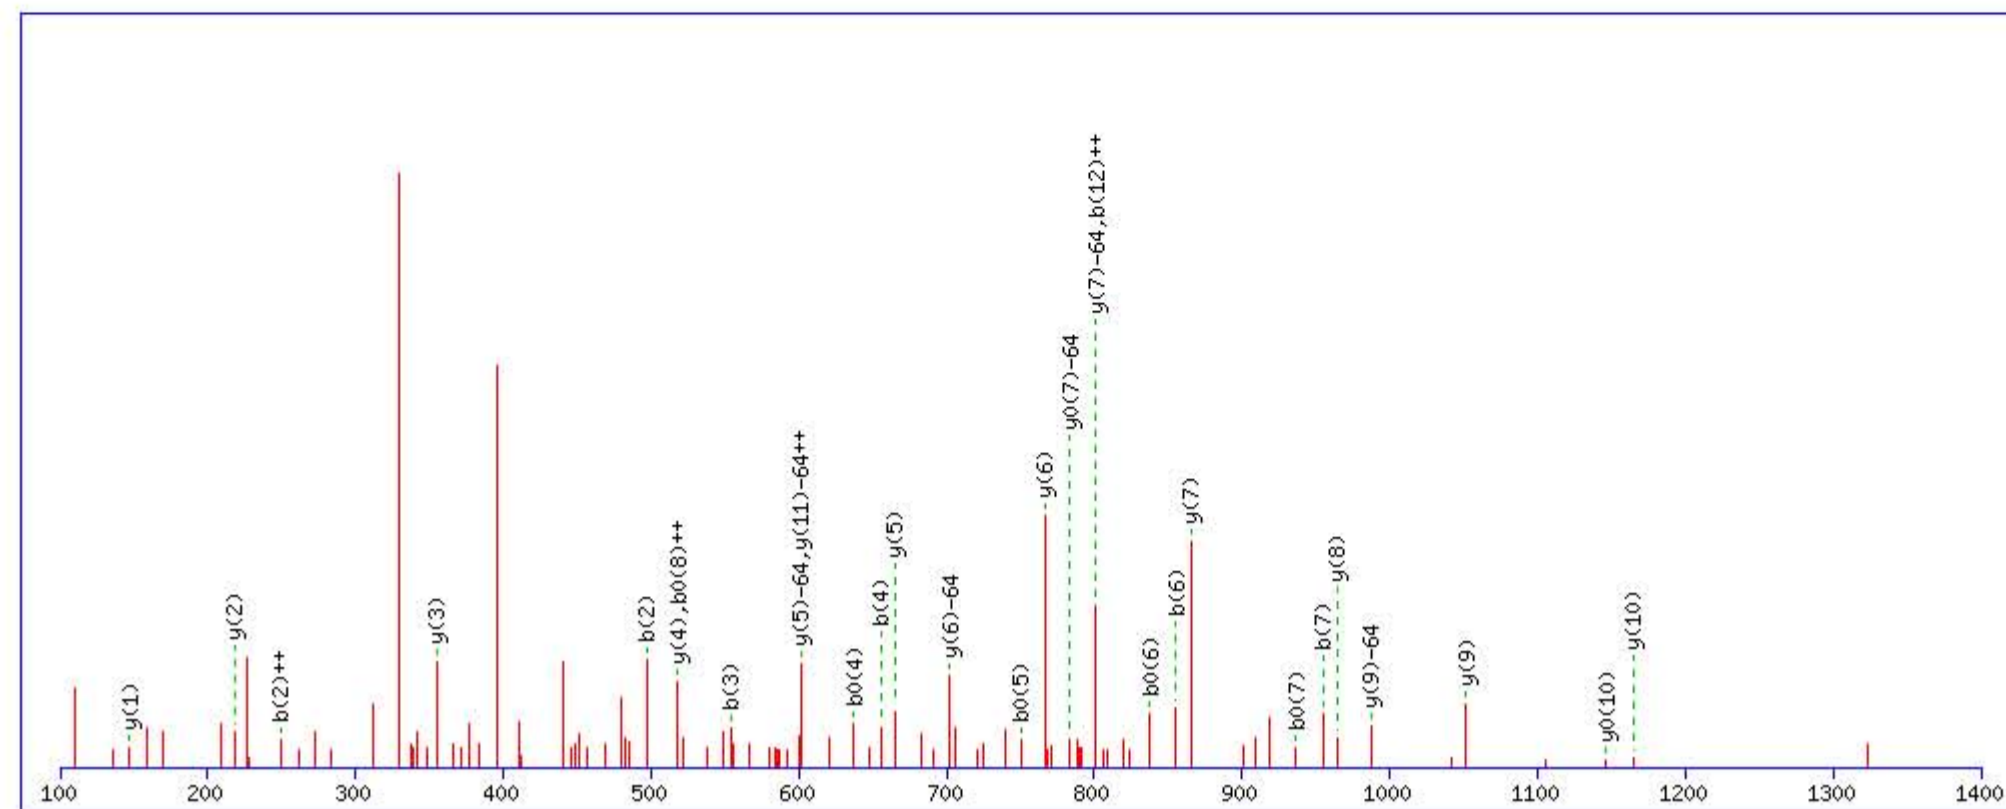

Monoisotopic mass of neutral peptide Mr(calc): 1817.916824

Fixed modifications: Carbamidomethyl (C) (apply to specified residues or termini only)

Variable modifications:

Q2 : Biotin:Thermo-21345 (Q)

M10 : Oxidation (M), with neutral losses 0.000000 (shown in table), 63.998285

Ions Score: 51 Expect: 0.00018

Matches : 29/214 fragment ions using 51 most intense peaks ([help](#))

| #  | b                 | b <sup>++</sup>   | b <sup>*</sup> | b <sup>+++</sup> | b <sup>0</sup>    | b <sup>0++</sup>  | Seq. | y                  | y <sup>++</sup> | y <sup>*</sup> | y <sup>+++</sup> | y <sup>0</sup>     | y <sup>0++</sup> | #  |
|----|-------------------|-------------------|----------------|------------------|-------------------|-------------------|------|--------------------|-----------------|----------------|------------------|--------------------|------------------|----|
| 1  | 58.028740         | 29.518008         |                |                  |                   |                   | G    |                    |                 |                |                  |                    |                  | 14 |
| 2  | <b>497.254066</b> | <b>249.130671</b> | 480.227517     | 240.617397       |                   |                   | Q    | 1761.902627        | 881.454952      | 1744.876078    | 872.941677       | 1743.892062        | 872.449669       | 13 |
| 3  | <b>554.275530</b> | 277.641403        | 537.248981     | 269.128129       |                   |                   | G    | 1322.677301        | 661.842289      | 1305.650752    | 653.329014       | 1304.666736        | 652.837006       | 12 |
| 4  | <b>655.323209</b> | 328.165243        | 638.296660     | 319.651968       | <b>637.312644</b> | 319.159960        | T    | 1265.655837        | 633.331557      | 1248.629288    | 624.818282       | 1247.645272        | 624.326274       | 11 |
| 5  | 768.407273        | 384.707275        | 751.380724     | 376.194000       | <b>750.396708</b> | 375.701992        | L    | <b>1164.608158</b> | 582.807717      | 1147.581609    | 574.294443       | <b>1146.597593</b> | 573.802435       | 10 |
| 6  | <b>855.439301</b> | 428.223289        | 838.412752     | 419.710014       | <b>837.428736</b> | 419.218006        | S    | <b>1051.524094</b> | 526.265685      | 1034.497545    | 517.752411       | 1033.513529        | 517.260403       | 9  |
| 7  | <b>954.507715</b> | 477.757496        | 937.481166     | 469.244221       | <b>936.497150</b> | 468.752213        | V    | <b>964.492066</b>  | 482.749671      | 947.465517     | 474.236397       | 946.481501         | 473.744389       | 8  |
| 8  | 1053.576129       | 527.291703        | 1036.549580    | 518.778428       | 1035.565564       | <b>518.286420</b> | V    | <b>865.423652</b>  | 433.215464      | 848.397103     | 424.702190       | 847.413087         | 424.210182       | 7  |
| 9  | 1154.623808       | 577.815542        | 1137.597259    | 569.302268       | 1136.613243       | 568.810260        | T    | <b>766.355238</b>  | 383.681257      | 749.328689     | 375.167983       | 748.344673         | 374.675975       | 6  |
| 10 | 1301.659208       | 651.333242        | 1284.632659    | 642.819968       | 1283.648643       | 642.327960        | M    | <b>665.307559</b>  | 333.157418      | 648.281010     | 324.644143       |                    |                  | 5  |
| 11 | 1464.722537       | 732.864907        | 1447.695988    | 724.351632       | 1446.711972       | 723.859624        | Y    | <b>518.272159</b>  | 259.639718      | 501.245610     | 251.126443       |                    |                  | 4  |
| 12 | 1601.781449       | <b>801.394363</b> | 1584.754900    | 792.881088       | 1583.770884       | 792.389080        | H    | <b>355.208830</b>  | 178.108053      | 338.182281     | 169.594778       |                    |                  | 3  |
| 13 | 1672.818563       | 836.912920        | 1655.792014    | 828.399645       | 1654.807998       | 827.907637        | A    | <b>218.149918</b>  | 109.578597      | 201.123369     | 101.065322       |                    |                  | 2  |
| 14 |                   |                   |                |                  |                   |                   | K    | <b>147.112804</b>  | 74.060040       | 130.086255     | 65.546765        |                    |                  | 1  |

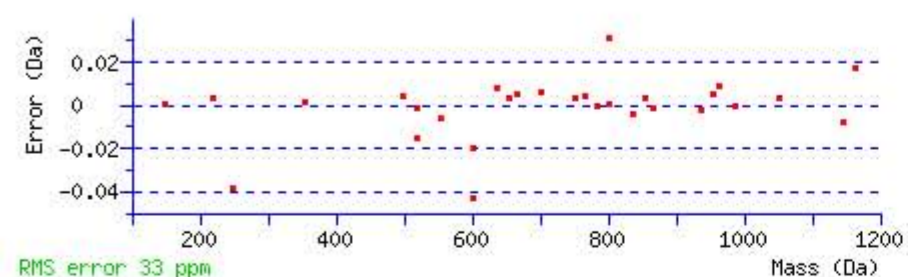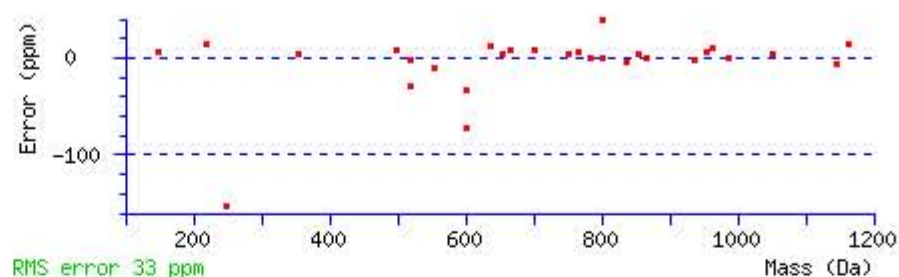

NCBI BLAST search of **GQGTL SVVTMYHAK**

(Parameters: blastp, nr protein database, expect=20000, no filter, PAM30)

Other BLAST [web gateways](#)

All matches to this query

| Score | Mr(calc):   | Delta     | Sequence                        |
|-------|-------------|-----------|---------------------------------|
| 51.5  | 1817.916824 | -0.006362 | <a href="#">GQGTL SVVTMYHAK</a> |

# MASCOT Search Results

## Peptide View

MS/MS Fragmentation of **SGSDEVQVGQQR**

Found in **CO3\_HUMAN**, Complement C3 OS=Homo sapiens GN=C3 PE=1 SV=2

Match to Query 37639: 1910.930052 from(637.983960,3+) rtinseconds(1923) index(31254)

Title: Locus:1.1.1.3333.15 File:"2013-07-02 CLN FXIII 180 min 3rd F 3.wiff"

Data file C:\Program Files (x86)\Matrix Science\Mascot Daemon\mgf9 FXIII 180 min 3rd\mascot\_daemon\_merge.mgf

Click mouse within plot area to zoom in by factor of two about that point

Or, Plot from  to  Da

Label all possible matches  Label matches used for scoring

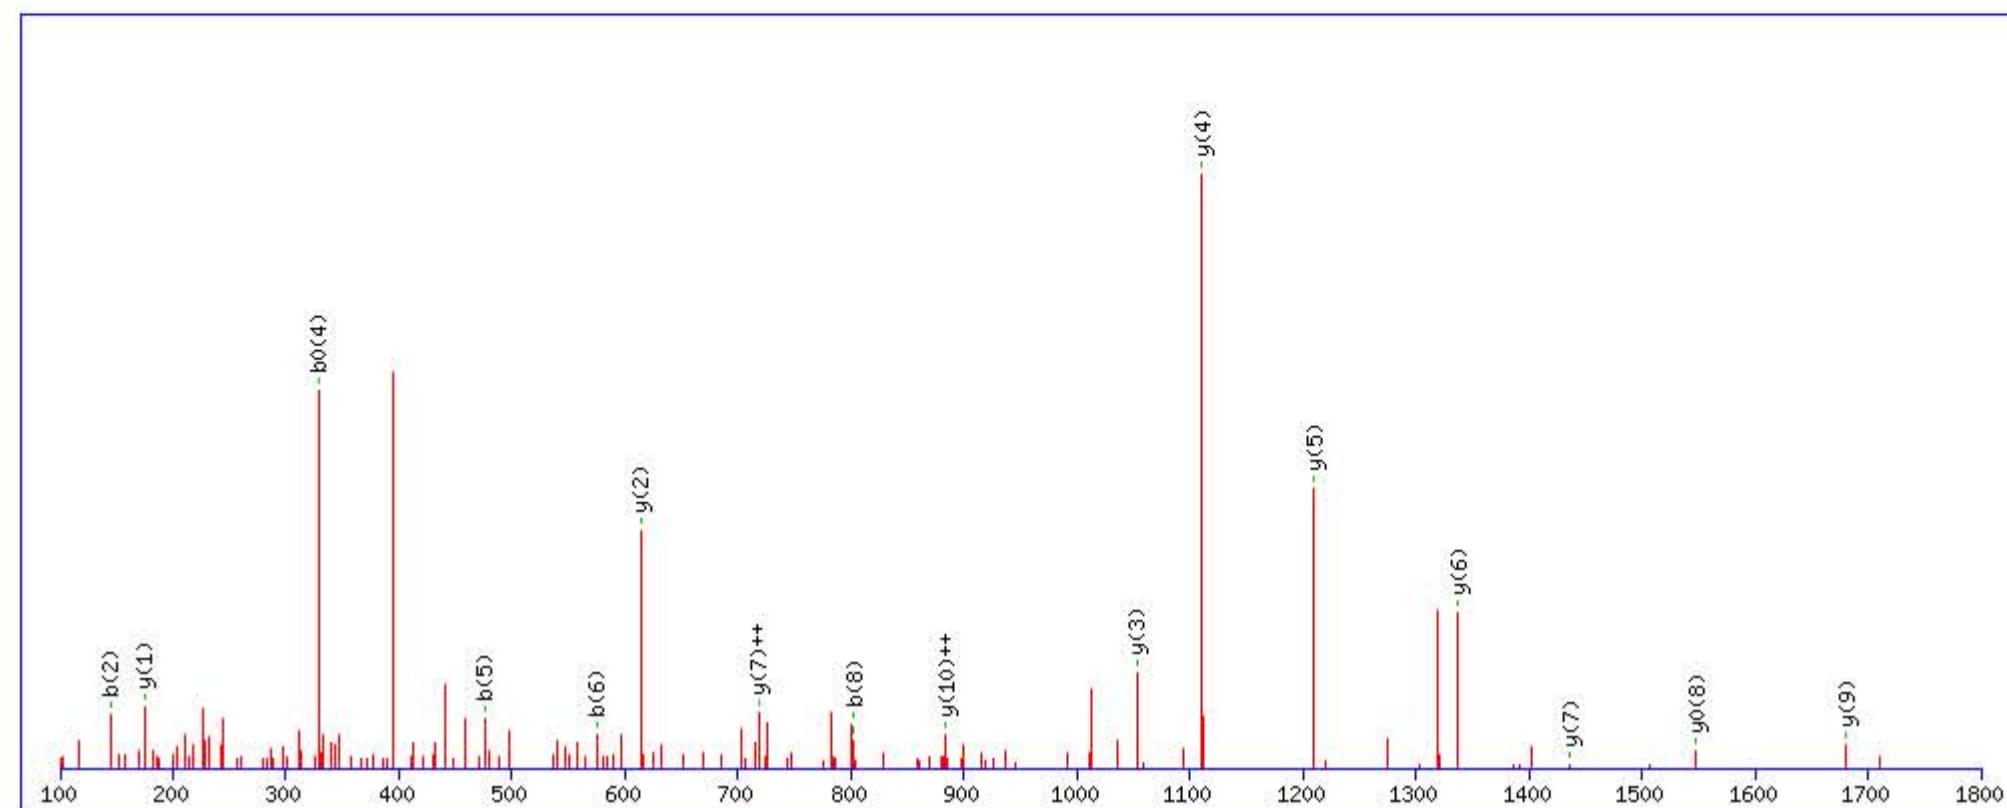

Monoisotopic mass of neutral peptide Mr(calc): 1910.934265

Fixed modifications: Carbamidomethyl (C) (apply to specified residues or termini only)

Variable modifications:

Q10 : Biotin:Thermo-21345 (Q)

Q11 : Biotin:Thermo-21345 (Q)

Ions Score: 40 Expect: 0.00083

Matches : 16/106 fragment ions using 32 most intense peaks [\(help\)](#)

| #  | b                 | b <sup>++</sup> | b <sup>*</sup> | b <sup>+++</sup> | b <sup>0</sup>    | b <sup>0++</sup> | Seq. | y                  | y <sup>++</sup>   | y <sup>*</sup> | y <sup>+++</sup> | y <sup>0</sup>     | y <sup>0++</sup> | #  |
|----|-------------------|-----------------|----------------|------------------|-------------------|------------------|------|--------------------|-------------------|----------------|------------------|--------------------|------------------|----|
| 1  | 88.039304         | 44.523290       |                |                  | 70.028739         | 35.518008        | S    |                    |                   |                |                  |                    |                  | 12 |
| 2  | <b>145.060768</b> | 73.034022       |                |                  | 127.050203        | 64.028740        | G    | 1824.909502        | 912.958389        | 1807.882953    | 904.445115       | 1806.898937        | 903.953107       | 11 |
| 3  | 232.092796        | 116.550036      |                |                  | 214.082231        | 107.544753       | S    | 1767.888038        | <b>884.447657</b> | 1750.861489    | 875.934383       | 1749.877473        | 875.442375       | 10 |
| 4  | 347.119739        | 174.063507      |                |                  | <b>329.109174</b> | 165.058225       | D    | <b>1680.856010</b> | 840.931643        | 1663.829461    | 832.418369       | 1662.845445        | 831.926361       | 9  |
| 5  | <b>476.162332</b> | 238.584804      |                |                  | 458.151767        | 229.579522       | E    | 1565.829067        | 783.418172        | 1548.802518    | 774.904897       | <b>1547.818502</b> | 774.412889       | 8  |
| 6  | <b>575.230746</b> | 288.119011      |                |                  | 557.220181        | 279.113729       | V    | <b>1436.786474</b> | <b>718.896875</b> | 1419.759925    | 710.383601       |                    |                  | 7  |
| 7  | 703.289324        | 352.148300      | 686.262775     | 343.635026       | 685.278759        | 343.143018       | Q    | <b>1337.718060</b> | 669.362668        | 1320.691511    | 660.849394       |                    |                  | 6  |
| 8  | <b>802.357738</b> | 401.682507      | 785.331189     | 393.169233       | 784.347173        | 392.677225       | V    | <b>1209.659482</b> | 605.333379        | 1192.632933    | 596.820105       |                    |                  | 5  |
| 9  | 859.379202        | 430.193239      | 842.352653     | 421.679965       | 841.368637        | 421.187957       | G    | <b>1110.591068</b> | 555.799172        | 1093.564519    | 547.285898       |                    |                  | 4  |
| 10 | 1298.604528       | 649.805902      | 1281.577979    | 641.292628       | 1280.593963       | 640.800620       | Q    | <b>1053.569604</b> | 527.288440        | 1036.543055    | 518.775166       |                    |                  | 3  |
| 11 | 1737.829854       | 869.418565      | 1720.803305    | 860.905291       | 1719.819289       | 860.413283       | Q    | <b>614.344278</b>  | 307.675777        | 597.317729     | 299.162503       |                    |                  | 2  |
| 12 |                   |                 |                |                  |                   |                  | R    | <b>175.118952</b>  | 88.063114         | 158.092403     | 79.549839        |                    |                  | 1  |

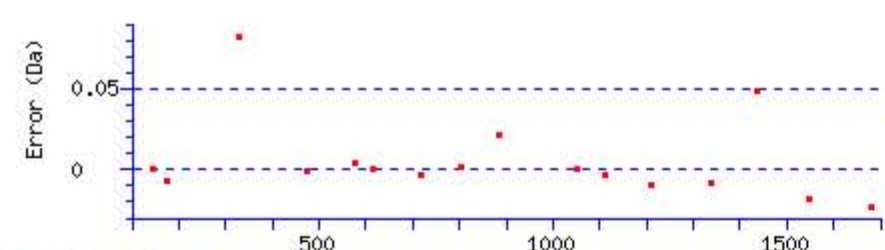

RMS error 64 ppm

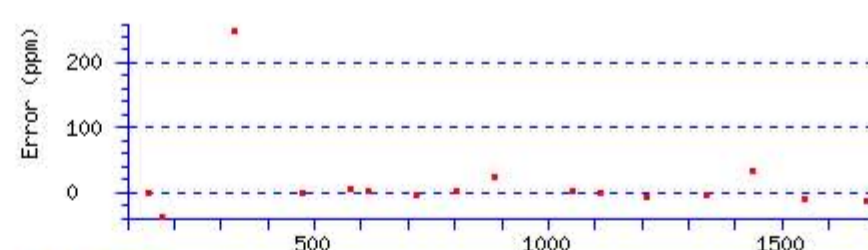

RMS error 64 ppm

NCBI BLAST search of **SGSDEVQVGQQR**

(Parameters: blastp, nr protein database, expect=20000, no filter, PAM30)

Other BLAST [web gateways](#)

All matches to this query

| Score | Mr(calc):   | Delta     | Sequence                             |
|-------|-------------|-----------|--------------------------------------|
| 40.1  | 1910.934265 | -0.004213 | <a href="#">SGSDEVQVGQQR</a>         |
| 12.3  | 1910.934265 | -0.004213 | <a href="#">SGSDEVQVGQQR</a>         |
| 6.8   | 1910.958542 | -0.028490 | <a href="#">TDDYGRDLSSVQILLTK</a>    |
| 6.2   | 1910.934265 | -0.004213 | <a href="#">SGSDEVQVGQQR</a>         |
| 1.9   | 1910.915619 | 0.014433  | <a href="#">EDSGSGMKAELPPGPGAVGR</a> |
| 0.0   | 1910.949310 | -0.019258 | <a href="#">GILSQMGRHSQSRSHSK</a>    |

Mascot: <http://www.matrixscience.com/>

# MASCOT SEARCH RESULTS

## Peptide View

MS/MS Fragmentation of **SGSDEVQVGQQR**

Found in **CO3\_HUMAN**, Complement C3 OS=Homo sapiens GN=C3 PE=1 SV=2

Match to Query 37642: 1910.930802 from(637.984210,3+) rtinseconds(1891) index(31052)

Title: Locus:1.1.1.3322.9 File:"2013-07-02 CLN FXIII 180 min 3rd F 3.wiff"

Data file C:\Program Files (x86)\Matrix Science\Mascot Daemon\mgf9 FXIII 180 min 3rd\mascot\_daemon\_merge.mgf

Click mouse within plot area to zoom in by factor of two about that point

Or, Plot from  to  Da

Label all possible matches  Label matches used for scoring

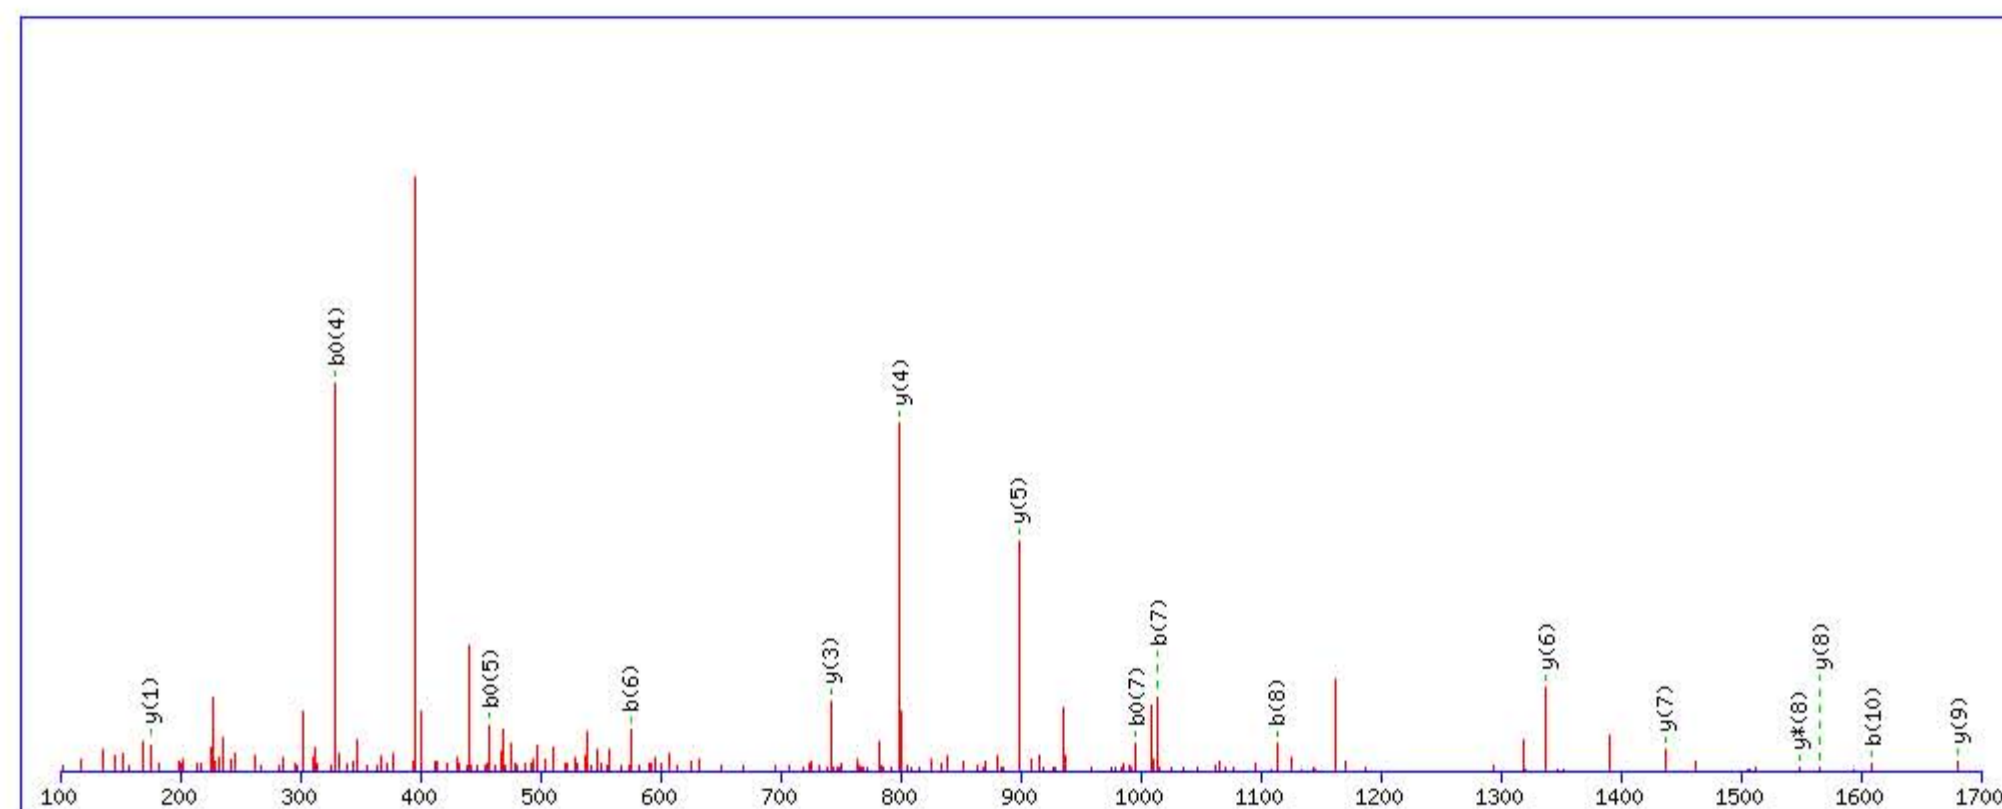

Monoisotopic mass of neutral peptide Mr(calc): 1910.934265

Fixed modifications: Carbamidomethyl (C) (apply to specified residues or termini only)

Variable modifications:

Q7 : Biotin:Thermo-21345 (Q)

Q10 : Biotin:Thermo-21345 (Q)

Ions Score: 40 Expect: 0.0021

Matches : 16/106 fragment ions using 31 most intense peaks [\(help\)](#)

| #  | b           | b <sup>++</sup> | b <sup>+</sup> | b <sup>+++</sup> | b <sup>0</sup> | b <sup>0++</sup> | Seq. | y           | y <sup>++</sup> | y <sup>+</sup> | y <sup>+++</sup> | y <sup>0</sup> | y <sup>0++</sup> | #  |
|----|-------------|-----------------|----------------|------------------|----------------|------------------|------|-------------|-----------------|----------------|------------------|----------------|------------------|----|
| 1  | 88.039304   | 44.523290       |                |                  | 70.028739      | 35.518008        | S    |             |                 |                |                  |                |                  | 12 |
| 2  | 145.060768  | 73.034022       |                |                  | 127.050203     | 64.028740        | G    | 1824.909502 | 912.958389      | 1807.882953    | 904.445115       | 1806.898937    | 903.953107       | 11 |
| 3  | 232.092796  | 116.550036      |                |                  | 214.082231     | 107.544753       | S    | 1767.888038 | 884.447657      | 1750.861489    | 875.934383       | 1749.877473    | 875.442375       | 10 |
| 4  | 347.119739  | 174.063507      |                |                  | 329.109174     | 165.058225       | D    | 1680.856010 | 840.931643      | 1663.829461    | 832.418369       | 1662.845445    | 831.926361       | 9  |
| 5  | 476.162332  | 238.584804      |                |                  | 458.151767     | 229.579522       | E    | 1565.829067 | 783.418172      | 1548.802518    | 774.904897       | 1547.818502    | 774.412889       | 8  |
| 6  | 575.230746  | 288.119011      |                |                  | 557.220181     | 279.113729       | V    | 1436.786474 | 718.896875      | 1419.759925    | 710.383601       |                |                  | 7  |
| 7  | 1014.456072 | 507.731674      | 997.429523     | 499.218400       | 996.445507     | 498.726392       | Q    | 1337.718060 | 669.362668      | 1320.691511    | 660.849394       |                |                  | 6  |
| 8  | 1113.524486 | 557.265881      | 1096.497937    | 548.752607       | 1095.513921    | 548.260599       | V    | 898.492734  | 449.750005      | 881.466185     | 441.236731       |                |                  | 5  |
| 9  | 1170.545950 | 585.776613      | 1153.519401    | 577.263339       | 1152.535385    | 576.771330       | G    | 799.424320  | 400.215798      | 782.397771     | 391.702524       |                |                  | 4  |
| 10 | 1609.771276 | 805.389276      | 1592.744727    | 796.876002       | 1591.760711    | 796.383994       | Q    | 742.402856  | 371.705066      | 725.376307     | 363.191792       |                |                  | 3  |
| 11 | 1737.829854 | 869.418565      | 1720.803305    | 860.905291       | 1719.819289    | 860.413283       | Q    | 303.177530  | 152.092403      | 286.150981     | 143.579129       |                |                  | 2  |
| 12 |             |                 |                |                  |                |                  | R    | 175.118952  | 88.063114       | 158.092403     | 79.549839        |                |                  | 1  |

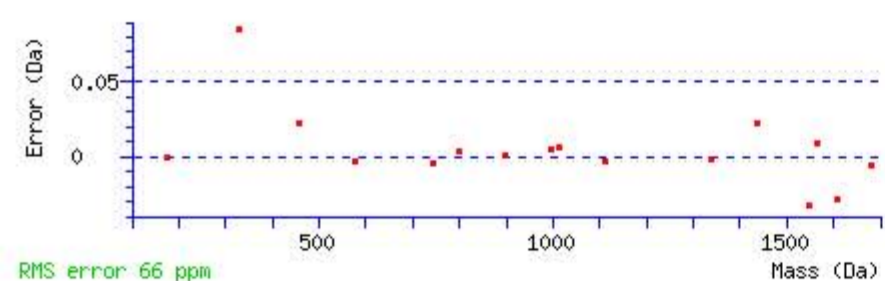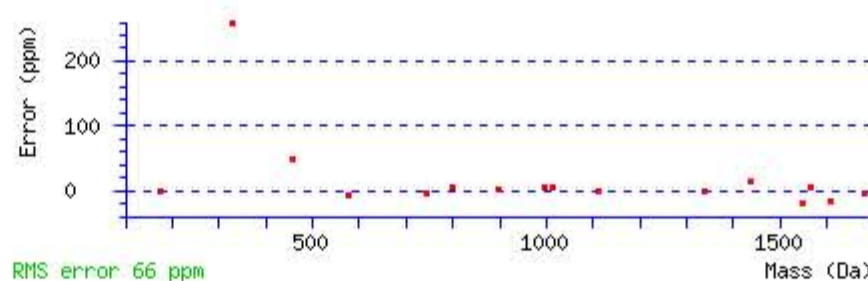

NCBI BLAST search of **SGSDEVQVGQQR**

(Parameters: blastp, nr protein database, expect=20000, no filter, PAM30)

Other BLAST [web gateways](#)

All matches to this query

| Score | Mr(calc):   | Delta     | Sequence                        |
|-------|-------------|-----------|---------------------------------|
| 40.4  | 1910.934265 | -0.003463 | <a href="#">SGSDEVQVGQQR</a>    |
| 38.6  | 1910.934265 | -0.003463 | <a href="#">SGSDEVQVGQQR</a>    |
| 32.7  | 1910.938263 | -0.007461 | <a href="#">YVTSAPMPEPQAPGR</a> |
| 1.6   | 1910.934265 | -0.003463 | <a href="#">SGSDEVQVGQQR</a>    |



MASCOT SCIENCE Mascot Search Results

Peptide View

MS/MS Fragmentation of DTWVEHWPEEDECQDEENQK
Found in CO3\_HUMAN, Complement C3 OS=Homo sapiens GN=C3 PE=1 SV=2

Match to Query 38202: 2913.174372 from(972.065400,3+) rtinseconds(2137) index(46828)
Title: Locus:1.1.1.3456.24 File:"2013-07-02 CLN FXIII 180 min 3rd F 4.wiff"
Data file C:\Program Files (x86)\Matrix Science\Mascot Daemon\mgf9 FXIII 180 min 3rd\mascot\_daemon\_merge.mgf

Click mouse within plot area to zoom in by factor of two about that point
Or, Plot from 100 to 2000 Da Full range

Label all possible matches Label matches used for scoring

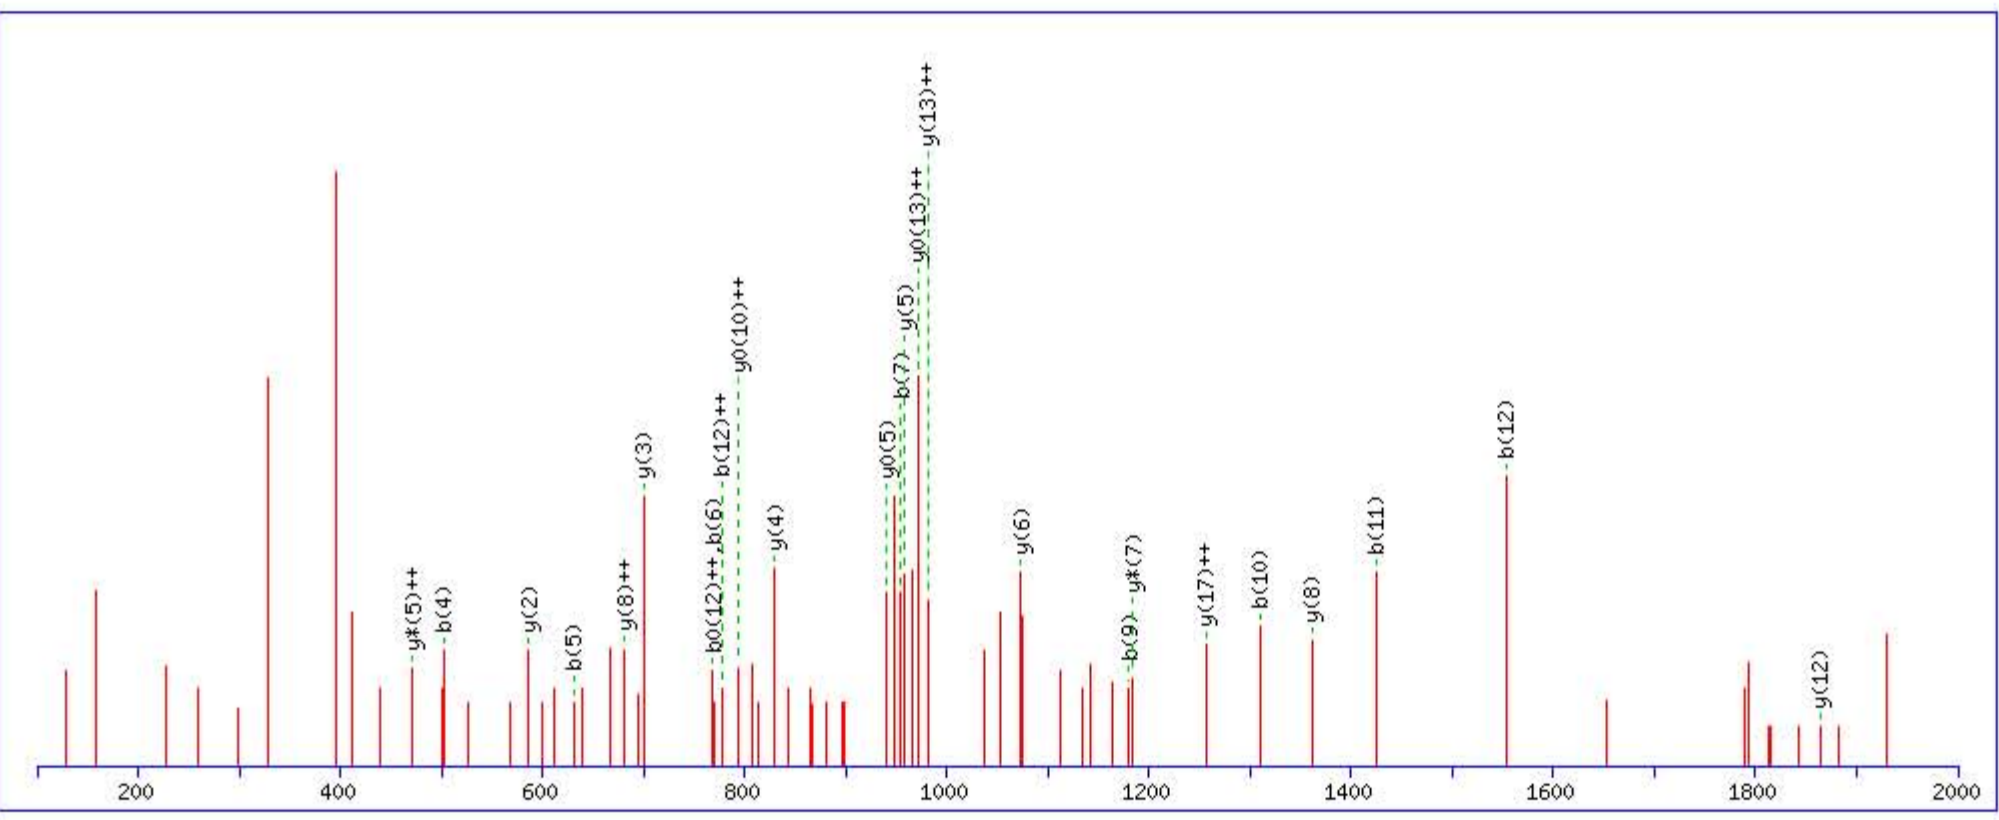

Monoisotopic mass of neutral peptide Mr(calc): 2913.185776
Fixed modifications: Carbamidomethyl (C) (apply to specified residues or termini only)
Variable modifications: Q19 : Biotin:Thermo-21345 (Q)
Ions Score: 28 Expect: 0.012
Matches : 25/196 fragment ions using 68 most intense peaks (help)

Table with 14 columns: #, b, b++, b\*, b\*+, b0, b0++, Seq., y, y++, y\*, y\*+, y0, y0+, #. It lists fragmentation ions and their corresponding masses and sequences.

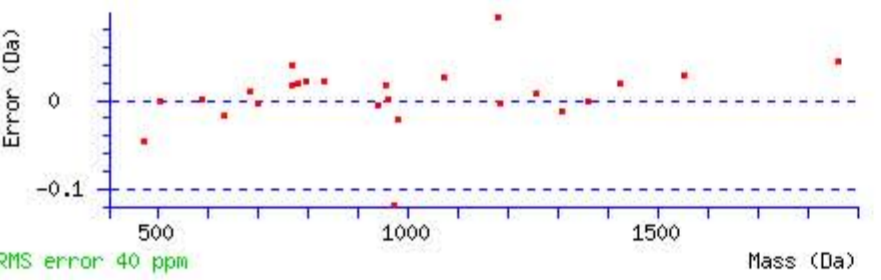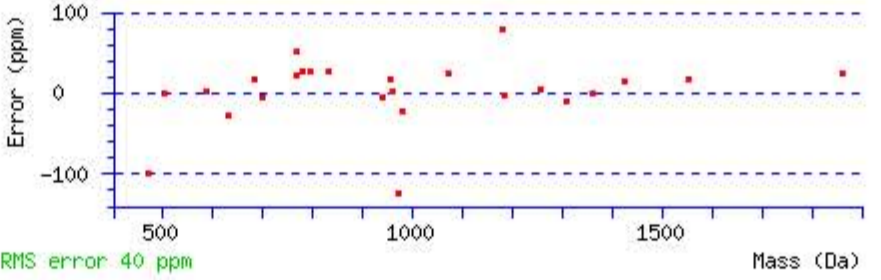

NCBI BLAST search of DTWVEHWPEEDECQDEENQK
(Parameters: blastp, nr protein database, expect=20000, no filter, PAM30)
Other BLAST web gateways

All matches to this query

Table with 4 columns: Score, Mr(calc):, Delta, Sequence. It shows the top two matches for the query.

Mascot: http://www.matrixscience.com/

















# MASCOT Search Results

## Peptide View

MS/MS Fragmentation of **ILLQGPVAQMTEDAVDAER**  
 Found in **CO3\_HUMAN**, Complement C3 OS=Homo sapiens GN=C3 PE=1 SV=2

Match to Query 47631: 2467.246122 from(823.422650,3+) rtinseconds(2688) index(35730)  
 Title: Locus:1.1.1.3599.18 File:"2013-07-02 CLN FXIII 180 min 3rd F 3.wiff"  
 Data file C:\Program Files (x86)\Matrix Science\Mascot Daemon\mgf9 FXIII 180 min 3rd\mascot\_daemon\_merge.mgf

Click mouse within plot area to zoom in by factor of two about that point  
 Or, Plot from  to  Da   
 Label all possible matches  Label matches used for scoring

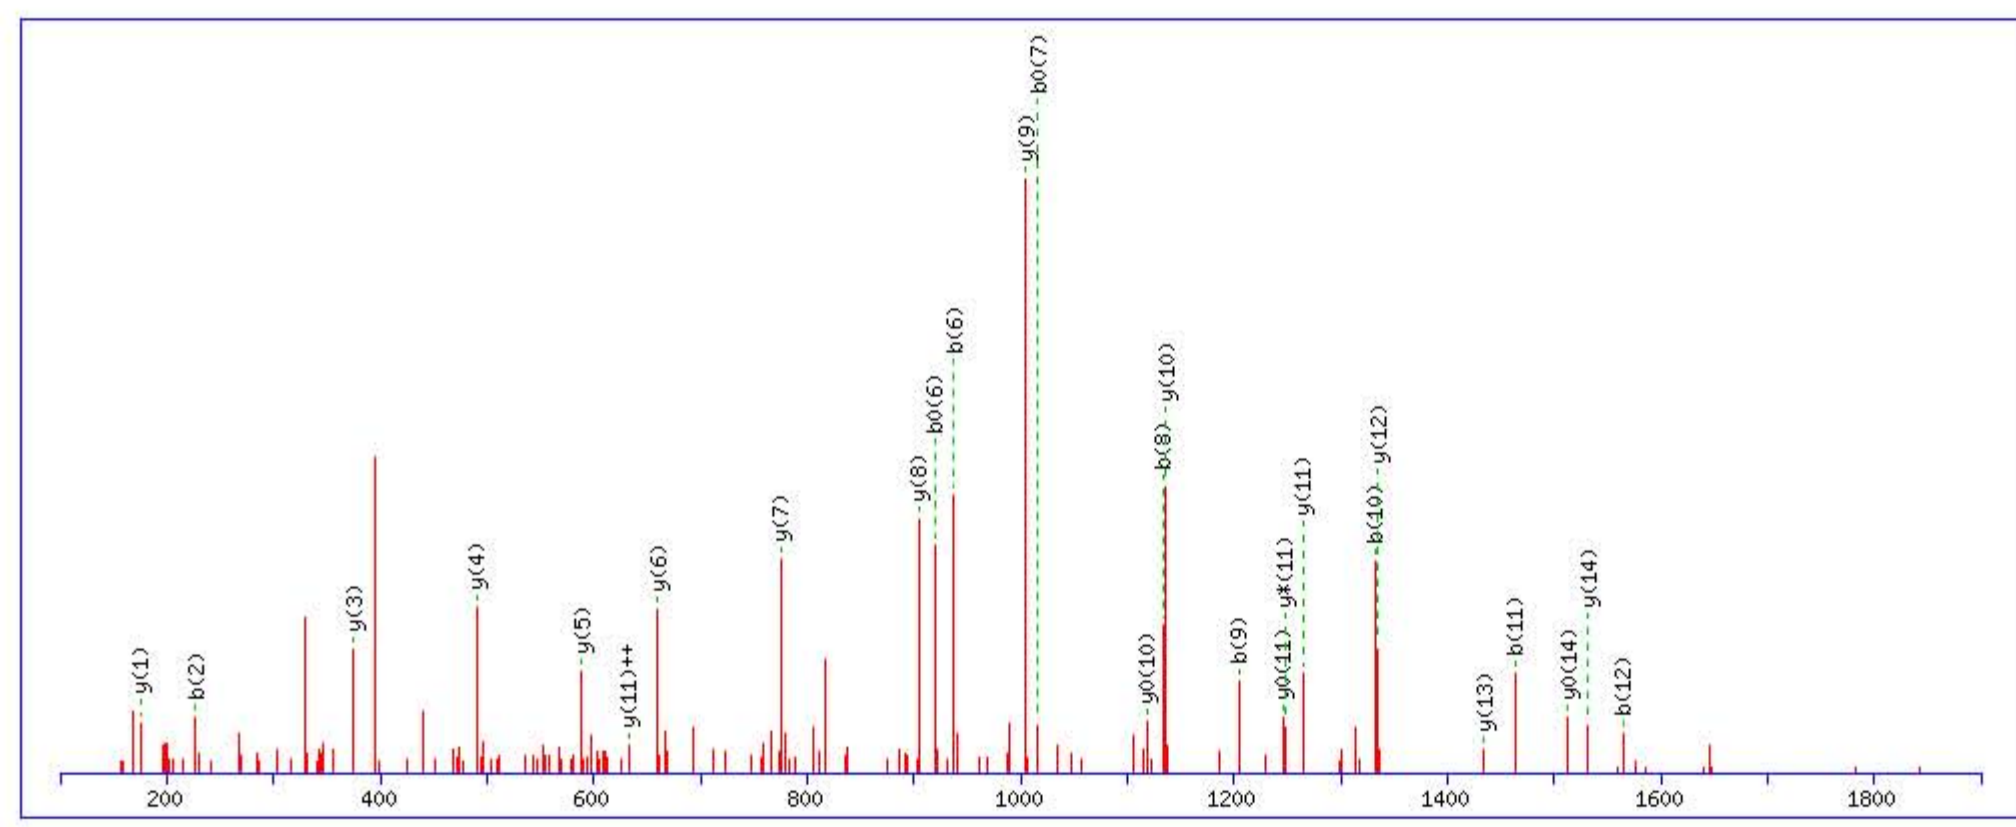

Monoisotopic mass of neutral peptide Mr(calc): 2467.245071  
 Fixed modifications: Carbamidomethyl (C) (apply to specified residues or termini only)  
 Variable modifications:  
 Q4 : Biotin:Thermo-21345 (Q)  
 Ions Score: 82 Expect: 1.9e-007  
 Matches : 27/210 fragment ions using 45 most intense peaks [\(help\)](#)

| #  | b                  | b <sup>++</sup> | b <sup>*</sup> | b <sup>*++</sup> | b <sup>0</sup>     | b <sup>0++</sup> | Seq. | y                  | y <sup>++</sup>   | y <sup>*</sup>     | y <sup>*++</sup> | y <sup>0</sup>     | y <sup>0++</sup> | #  |
|----|--------------------|-----------------|----------------|------------------|--------------------|------------------|------|--------------------|-------------------|--------------------|------------------|--------------------|------------------|----|
| 1  | 114.091340         | 57.549308       |                |                  |                    |                  | I    |                    |                   |                    |                  |                    |                  | 20 |
| 2  | <b>227.175404</b>  | 114.091340      |                |                  |                    |                  | L    | 2355.168297        | 1178.087786       | 2338.141748        | 1169.574512      | 2337.157732        | 1169.082504      | 19 |
| 3  | 340.259468         | 170.633372      |                |                  |                    |                  | L    | 2242.084233        | 1121.545754       | 2225.057684        | 1113.032480      | 2224.073668        | 1112.540472      | 18 |
| 4  | 779.484794         | 390.246035      | 762.458245     | 381.732760       |                    |                  | Q    | 2129.000169        | 1065.003722       | 2111.973620        | 1056.490448      | 2110.989604        | 1055.998440      | 17 |
| 5  | 836.506258         | 418.756767      | 819.479709     | 410.243493       |                    |                  | G    | 1689.774843        | 845.391060        | 1672.748294        | 836.877785       | 1671.764278        | 836.385777       | 16 |
| 6  | <b>937.553937</b>  | 469.280607      | 920.527388     | 460.767332       | <b>919.543372</b>  | 460.275324       | T    | 1632.753379        | 816.880328        | 1615.726830        | 808.367053       | 1614.742814        | 807.875045       | 15 |
| 7  | 1034.606701        | 517.806988      | 1017.580152    | 509.293714       | <b>1016.596136</b> | 508.801706       | P    | <b>1531.705700</b> | 766.356488        | 1514.679151        | 757.843214       | <b>1513.695135</b> | 757.351206       | 14 |
| 8  | <b>1133.675115</b> | 567.341196      | 1116.648566    | 558.827921       | 1115.664550        | 558.335913       | V    | <b>1434.652936</b> | 717.830106        | 1417.626387        | 709.316832       | 1416.642371        | 708.824824       | 13 |
| 9  | <b>1204.712229</b> | 602.859753      | 1187.685680    | 594.346478       | 1186.701664        | 593.854470       | A    | <b>1335.584522</b> | 668.295899        | 1318.557973        | 659.782625       | 1317.573957        | 659.290617       | 12 |
| 10 | <b>1332.770807</b> | 666.889042      | 1315.744258    | 658.375767       | 1314.760242        | 657.883759       | Q    | <b>1264.547408</b> | <b>632.777342</b> | <b>1247.520859</b> | 624.264068       | <b>1246.536843</b> | 623.772060       | 11 |
| 11 | <b>1463.811292</b> | 732.409284      | 1446.784743    | 723.896010       | 1445.800727        | 723.404002       | M    | <b>1136.488830</b> | 568.748053        | 1119.462281        | 560.234779       | <b>1118.478265</b> | 559.742771       | 10 |
| 12 | <b>1564.858971</b> | 782.933124      | 1547.832422    | 774.419849       | 1546.848406        | 773.927841       | T    | <b>1005.448345</b> | 503.227811        | 988.421796         | 494.714536       | 987.437780         | 494.222528       | 9  |
| 13 | 1693.901564        | 847.454420      | 1676.875015    | 838.941146       | 1675.890999        | 838.449138       | E    | <b>904.400666</b>  | 452.703971        | 887.374117         | 444.190697       | 886.390101         | 443.698689       | 8  |
| 14 | 1808.928507        | 904.967892      | 1791.901958    | 896.454617       | 1790.917942        | 895.962609       | D    | <b>775.358073</b>  | 388.182675        | 758.331524         | 379.669400       | 757.347508         | 379.177392       | 7  |
| 15 | 1879.965621        | 940.486449      | 1862.939072    | 931.973174       | 1861.955056        | 931.481166       | A    | <b>660.331130</b>  | 330.669203        | 643.304581         | 322.155929       | 642.320565         | 321.663921       | 6  |
| 16 | 1979.034035        | 990.020656      | 1962.007486    | 981.507381       | 1961.023470        | 981.015373       | V    | <b>589.294016</b>  | 295.150646        | 572.267467         | 286.637372       | 571.283451         | 286.145364       | 5  |
| 17 | 2094.060978        | 1047.534127     | 2077.034429    | 1039.020852      | 2076.050413        | 1038.528844      | D    | <b>490.225602</b>  | 245.616439        | 473.199053         | 237.103165       | 472.215037         | 236.611157       | 4  |
| 18 | 2165.098092        | 1083.052684     | 2148.071543    | 1074.539409      | 2147.087527        | 1074.047402      | A    | <b>375.198659</b>  | 188.102968        | 358.172110         | 179.589693       | 357.188094         | 179.097685       | 3  |
| 19 | 2294.140685        | 1147.573981     | 2277.114136    | 1139.060706      | 2276.130120        | 1138.568698      | E    | 304.161545         | 152.584411        | 287.134996         | 144.071136       | 286.150980         | 143.579128       | 2  |
| 20 |                    |                 |                |                  |                    |                  | R    | <b>175.118952</b>  | 88.063114         | 158.092403         | 79.549839        |                    |                  | 1  |

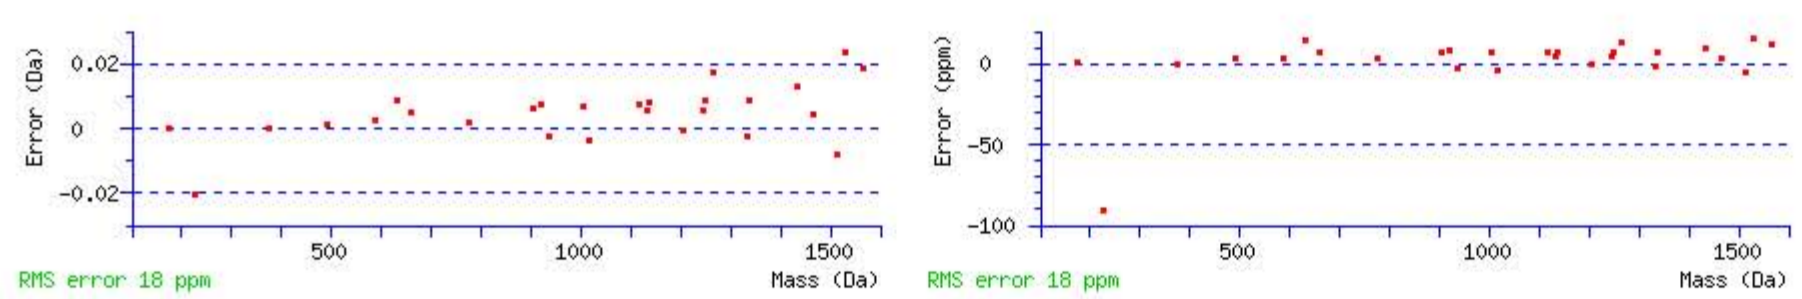

NCBI BLAST search of [ILLQGPVAQMTEDAVDAER](#)  
 (Parameters: blastp, nr protein database, expect=20000, no filter, PAM30)  
 Other BLAST [web gateways](#)

### All matches to this query

| Score | Mr(calc):   | Delta    | Sequence                            |
|-------|-------------|----------|-------------------------------------|
| 82.2  | 2467.245071 | 0.001051 | <a href="#">ILLQGPVAQMTEDAVDAER</a> |
| 53.6  | 2467.245071 | 0.001051 | <a href="#">ILLQGPVAQMTEDAVDAER</a> |

# MASCOT Search Results

## Peptide View

MS/MS Fragmentation of **VPVAVQGEDTVQSLTQGDGVAK**  
Found in **CO3\_HUMAN**, Complement C3 OS=Homo sapiens GN=C3 PE=1 SV=2

Match to Query 48626: 2508.279582 from(837.100470,3+) rtinseconds(2255) index(47589)  
Title: Locus:1.1.1.3497.16 File:"2013-07-02 CLN FXIII 180 min 3rd F 4.wiff"  
Data file C:\Program Files (x86)\Matrix Science\Mascot Daemon\mgf9 FXIII 180 min 3rd\mascot\_daemon\_merge.mgf

Click mouse within plot area to zoom in by factor of two about that point  
Or, Plot from  to  Da   
Label all possible matches  Label matches used for scoring

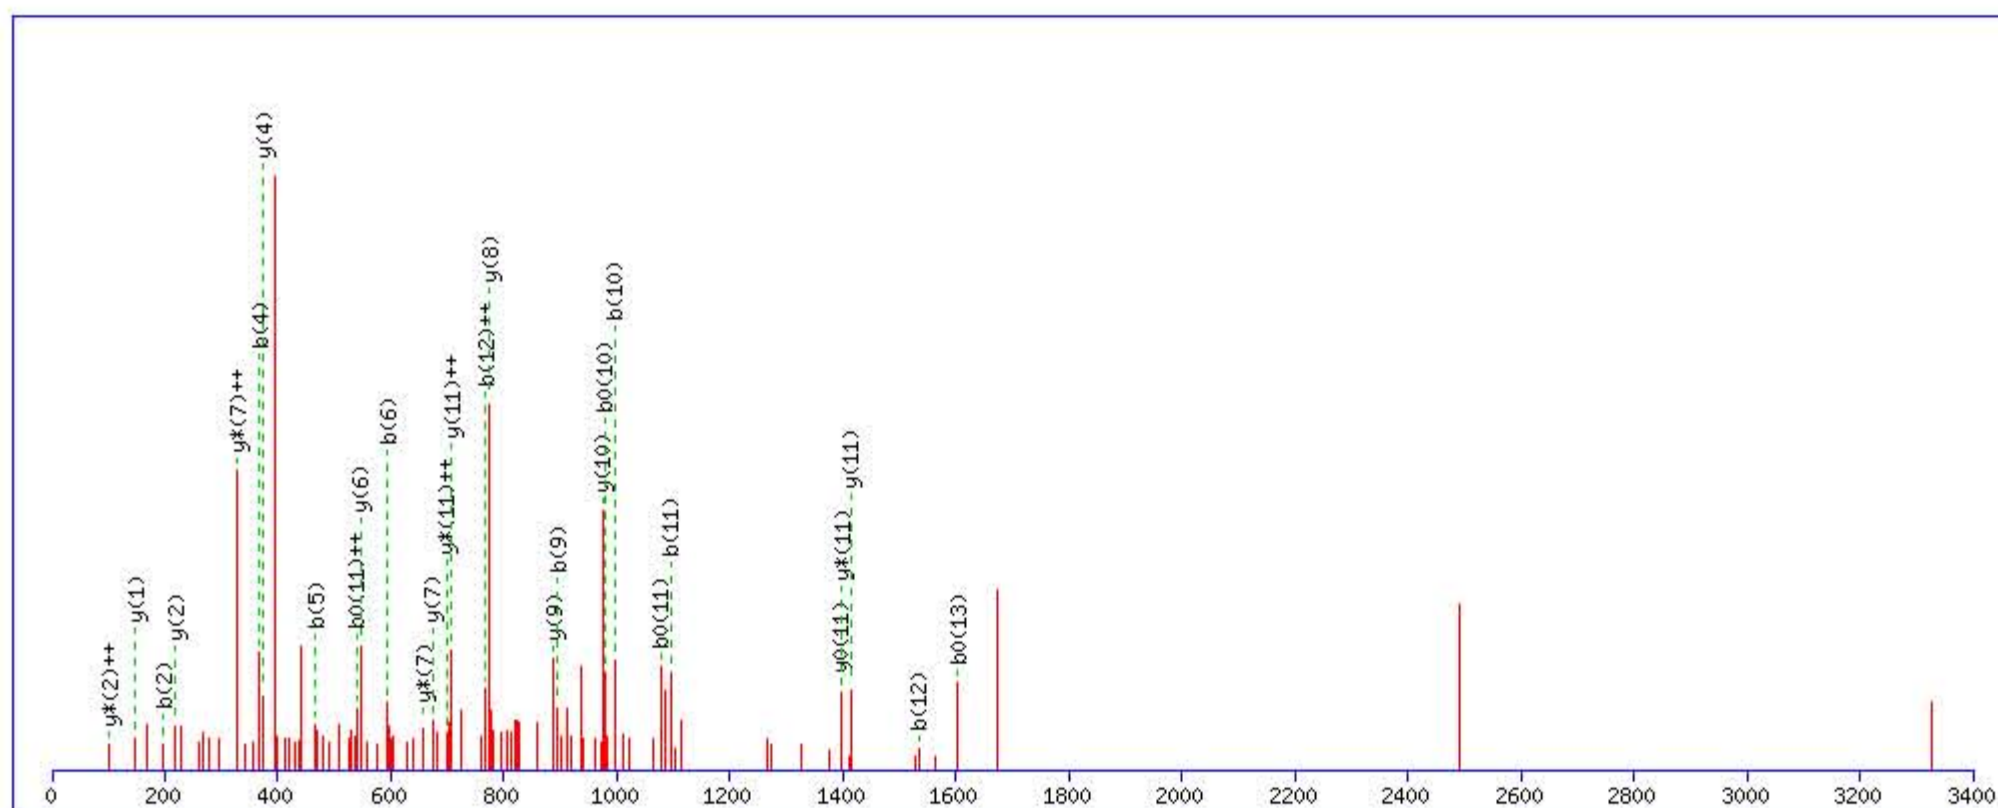

Monoisotopic mass of neutral peptide Mr(calc): 2508.289429  
Fixed modifications: Carbamidomethyl (C) (apply to specified residues or termini only)  
Variable modifications: Q12 : Biotin:Thermo-21345 (Q)  
Ions Score: 52 Expect: 0.00018  
Matches : 29/220 fragment ions using 59 most intense peaks [\(help\)](#)

| #  | b                  | b <sup>++</sup>   | b <sup>*</sup> | b <sup>*++</sup> | b <sup>0</sup>     | b <sup>0++</sup>  | Seq. | y                  | y <sup>++</sup>   | y <sup>*</sup>     | y <sup>*++</sup>  | y <sup>0</sup>     | y <sup>0++</sup> | #  |
|----|--------------------|-------------------|----------------|------------------|--------------------|-------------------|------|--------------------|-------------------|--------------------|-------------------|--------------------|------------------|----|
| 1  | 100.075690         | 50.541483         |                |                  |                    |                   | V    |                    |                   |                    |                   |                    |                  | 22 |
| 2  | <b>197.128454</b>  | 99.067865         |                |                  |                    |                   | P    | 2410.228255        | 1205.617765       | 2393.201706        | 1197.104491       | 2392.217690        | 1196.612483      | 21 |
| 3  | 296.196868         | 148.602072        |                |                  |                    |                   | V    | 2313.175491        | 1157.091383       | 2296.148942        | 1148.578109       | 2295.164926        | 1148.086101      | 20 |
| 4  | <b>367.233982</b>  | 184.120629        |                |                  |                    |                   | A    | 2214.107077        | 1107.557176       | 2197.080528        | 1099.043902       | 2196.096512        | 1098.551894      | 19 |
| 5  | <b>466.302396</b>  | 233.654836        |                |                  |                    |                   | V    | 2143.069963        | 1072.038619       | 2126.043414        | 1063.525345       | 2125.059398        | 1063.033337      | 18 |
| 6  | <b>594.360974</b>  | 297.684125        | 577.334425     | 289.170851       |                    |                   | Q    | 2044.001549        | 1022.504413       | 2026.975000        | 1013.991138       | 2025.990984        | 1013.499130      | 17 |
| 7  | 651.382438         | 326.194857        | 634.355889     | 317.681583       |                    |                   | G    | 1915.942971        | 958.475124        | 1898.916422        | 949.961849        | 1897.932406        | 949.469841       | 16 |
| 8  | 780.425031         | 390.716154        | 763.398482     | 382.202879       | 762.414466         | 381.710871        | E    | 1858.921507        | 929.964391        | 1841.894958        | 921.451117        | 1840.910942        | 920.959109       | 15 |
| 9  | <b>895.451974</b>  | 448.229625        | 878.425425     | 439.716351       | 877.441409         | 439.224343        | D    | 1729.878914        | 865.443095        | 1712.852365        | 856.929821        | 1711.868349        | 856.437812       | 14 |
| 10 | <b>996.499653</b>  | 498.753465        | 979.473104     | 490.240190       | <b>978.489088</b>  | 489.748182        | T    | 1614.851971        | 807.929623        | 1597.825422        | 799.416349        | 1596.841406        | 798.924341       | 13 |
| 11 | <b>1095.568067</b> | 548.287672        | 1078.541518    | 539.774397       | <b>1077.557502</b> | <b>539.282389</b> | V    | 1513.804292        | 757.405784        | 1496.777743        | 748.892510        | 1495.793727        | 748.400502       | 12 |
| 12 | <b>1534.793393</b> | <b>767.900335</b> | 1517.766844    | 759.387060       | 1516.782828        | 758.895052        | Q    | <b>1414.735878</b> | <b>707.871577</b> | <b>1397.709329</b> | <b>699.358303</b> | <b>1396.725313</b> | 698.866294       | 11 |
| 13 | 1621.825421        | 811.416349        | 1604.798872    | 802.903074       | <b>1603.814856</b> | 802.411066        | S    | <b>975.510552</b>  | 488.258914        | 958.484003         | 479.745639        | 957.499987         | 479.253631       | 10 |
| 14 | 1734.909485        | 867.958381        | 1717.882936    | 859.445106       | 1716.898920        | 858.953098        | L    | <b>888.478524</b>  | 444.742900        | 871.451975         | 436.229625        | 870.467959         | 435.737617       | 9  |
| 15 | 1835.957164        | 918.482220        | 1818.930615    | 909.968946       | 1817.946599        | 909.476938        | T    | <b>775.394460</b>  | 388.200868        | 758.367911         | 379.687593        | 757.383895         | 379.195585       | 8  |
| 16 | 1964.015742        | 982.511509        | 1946.989193    | 973.998235       | 1946.005177        | 973.506227        | Q    | <b>674.346781</b>  | 337.677029        | <b>657.320232</b>  | <b>329.163754</b> | 656.336216         | 328.671746       | 7  |
| 17 | 2021.037206        | 1011.022241       | 2004.010657    | 1002.508967      | 2003.026641        | 1002.016959       | G    | <b>546.288203</b>  | 273.647739        | 529.261654         | 265.134465        | 528.277638         | 264.642457       | 6  |
| 18 | 2136.064149        | 1068.535712       | 2119.037600    | 1060.022438      | 2118.053584        | 1059.530430       | D    | 489.266739         | 245.137007        | 472.240190         | 236.623733        | 471.256174         | 236.131725       | 5  |
| 19 | 2193.085613        | 1097.046444       | 2176.059064    | 1088.533170      | 2175.075048        | 1088.041162       | G    | <b>374.239796</b>  | 187.623536        | 357.213247         | 179.110261        |                    |                  | 4  |
| 20 | 2292.154027        | 1146.580651       | 2275.127478    | 1138.067377      | 2274.143462        | 1137.575369       | V    | 317.218332         | 159.112804        | 300.191783         | 150.599530        |                    |                  | 3  |
| 21 | 2363.191141        | 1182.099208       | 2346.164592    | 1173.585934      | 2345.180576        | 1173.093926       | A    | <b>218.149918</b>  | 109.578597        | 201.123369         | <b>101.065323</b> |                    |                  | 2  |
| 22 |                    |                   |                |                  |                    |                   | K    | <b>147.112804</b>  | 74.060040         | 130.086255         | 65.546765         |                    |                  | 1  |

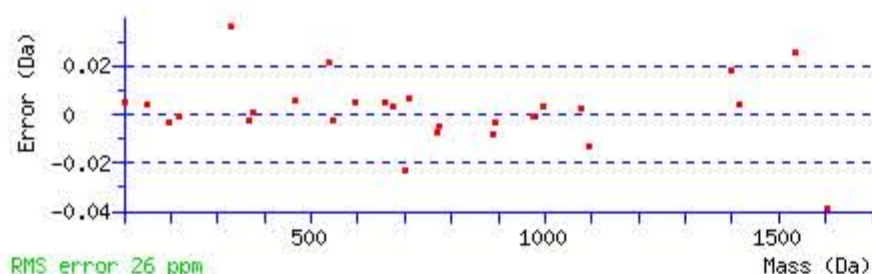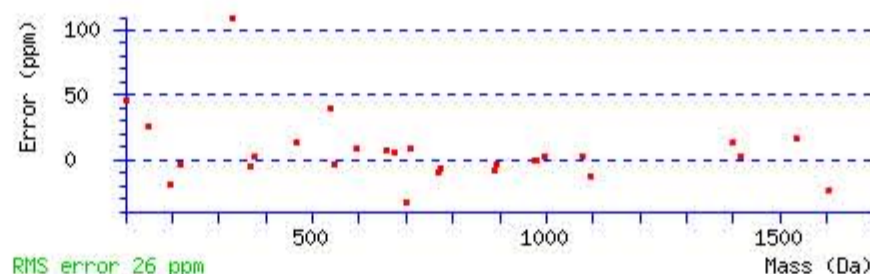

NCBI BLAST search of **VPVAVQGEDTVQSLTQGDGVAK**  
(Parameters: blastp, nr protein database, expect=20000, no filter, PAM30)  
Other BLAST [web gateways](#)

### All matches to this query

| Score | Mr(calc):   | Delta     | Sequence                               |
|-------|-------------|-----------|----------------------------------------|
| 52.0  | 2508.289429 | -0.009847 | <a href="#">VPVAVQGEDTVQSLTQGDGVAK</a> |
| 25.2  | 2508.289429 | -0.009847 | <a href="#">VPVAVQGEDTVQSLTQGDGVAK</a> |
| 24.7  | 2508.289429 | -0.009847 | <a href="#">VPVAVQGEDTVQSLTQGDGVAK</a> |

**Peptide View**

MS/MS Fragmentation of **EDIPPADLSDQVPDTESETR**  
 Found in **CO3\_HUMAN**, Complement C3 OS=Homo sapiens GN=C3 PE=1 SV=2

Match to Query 48808: 2524.161852 from(842.394560,3+) rtinseconds(2222) index(33168)  
 Title: Locus:1.1.1.3437.22 File:"2013-07-02 CLN FXIII 180 min 3rd F 3.wiff"  
 Data file C:\Program Files (x86)\Matrix Science\Mascot Daemon\mgf\9 FXIII 180 min 3rd\mascot\_daemon\_merge.mgf

Click mouse within plot area to zoom in by factor of two about that point  
 Or, Plot from 100 to 1900 Da Full range  
 Label all possible matches  Label matches used for scoring

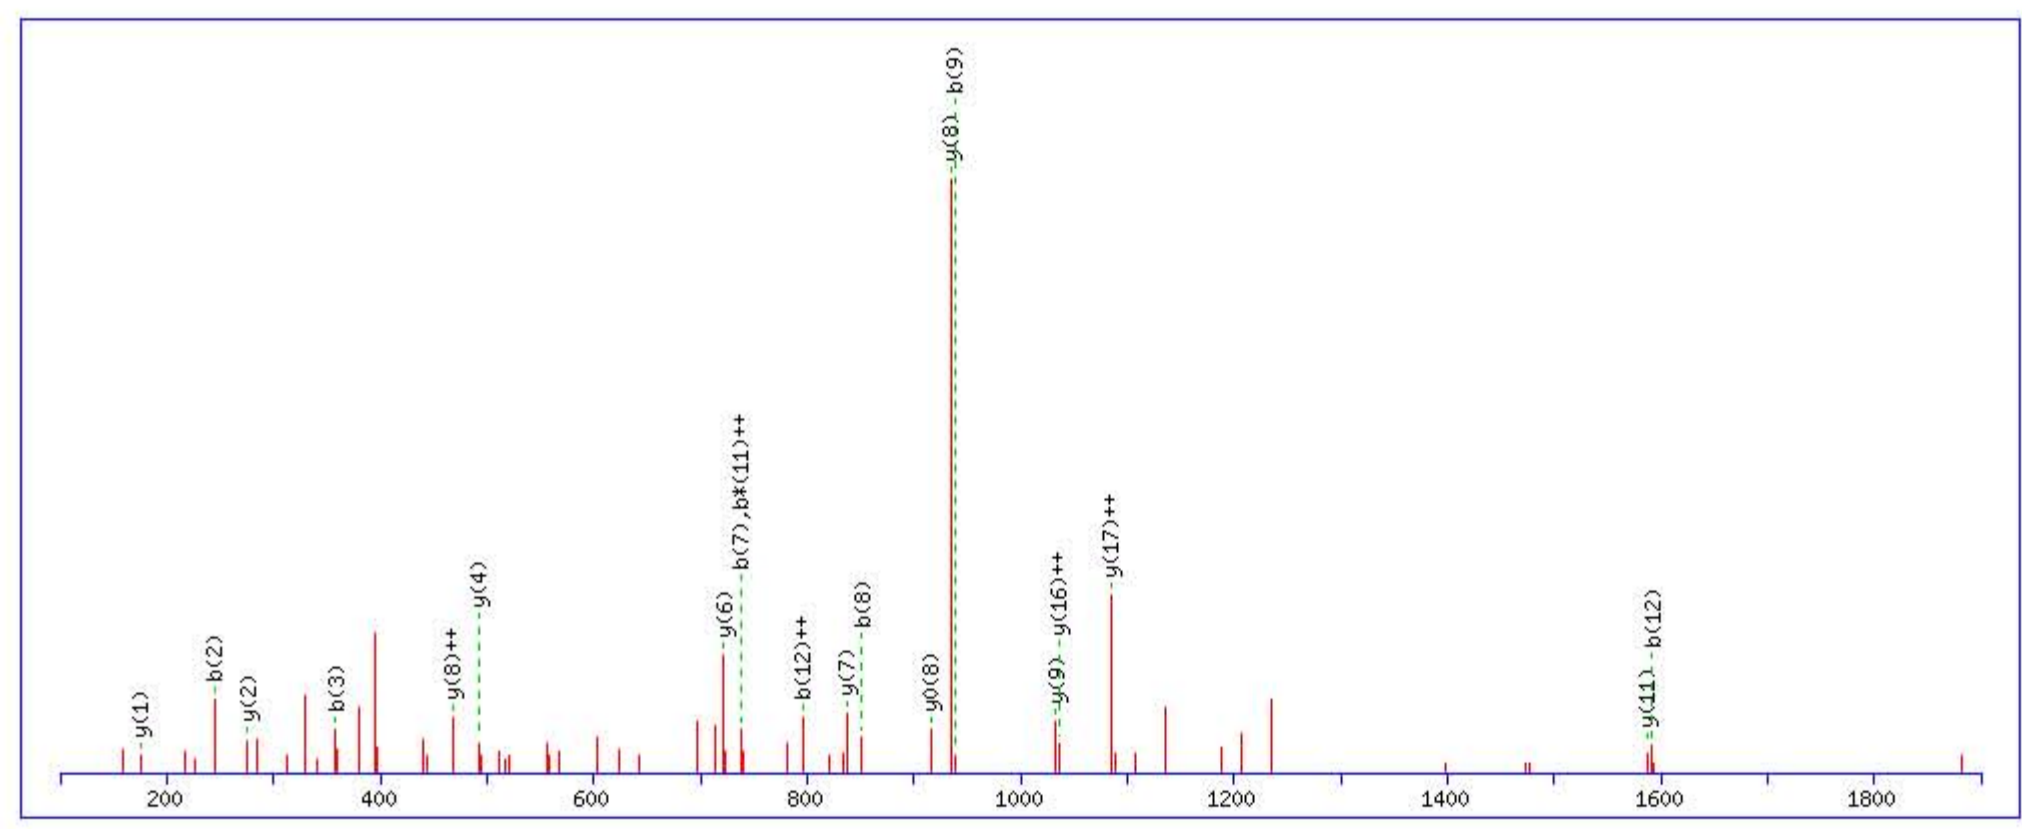

Monoisotopic mass of neutral peptide Mr(calc): 2524.163910  
 Fixed modifications: Carbamidomethyl (C) (apply to specified residues or termini only)  
 Variable modifications:  
 Q11 : Biotin:Thermo-21345 (Q)  
 Ions Score: 32 Expect: 0.0071  
 Matches : 20/206 fragment ions using 48 most intense peaks ([help](#))

| #  | b                  | b <sup>++</sup>   | b <sup>+</sup> | b <sup>+++</sup>  | b <sup>0</sup> | b <sup>0++</sup> | Seq. | y                  | y <sup>++</sup>    | y <sup>+</sup> | y <sup>+++</sup> | y <sup>0</sup>    | y <sup>0++</sup> | #  |
|----|--------------------|-------------------|----------------|-------------------|----------------|------------------|------|--------------------|--------------------|----------------|------------------|-------------------|------------------|----|
| 1  | 130.049869         | 65.528572         |                |                   | 112.039304     | 56.523290        | E    |                    |                    |                |                  |                   |                  | 20 |
| 2  | <b>245.076812</b>  | 123.042044        |                |                   | 227.066247     | 114.036762       | D    | 2396.128598        | 1198.567937        | 2379.102049    | 1190.054662      | 2378.118033       | 1189.562654      | 19 |
| 3  | <b>358.160876</b>  | 179.584076        |                |                   | 340.150311     | 170.578794       | I    | 2281.101655        | 1141.054465        | 2264.075106    | 1132.541191      | 2263.091090       | 1132.049183      | 18 |
| 4  | 455.213640         | 228.110458        |                |                   | 437.203075     | 219.105176       | P    | 2168.017591        | <b>1084.512433</b> | 2150.991042    | 1075.999159      | 2150.007026       | 1075.507151      | 17 |
| 5  | 552.266404         | 276.636840        |                |                   | 534.255839     | 267.631558       | P    | 2070.964827        | <b>1035.986051</b> | 2053.938278    | 1027.472777      | 2052.954262       | 1026.980769      | 16 |
| 6  | 623.303518         | 312.155397        |                |                   | 605.292953     | 303.150115       | A    | 1973.912063        | 987.459670         | 1956.885514    | 978.946395       | 1955.901498       | 978.454387       | 15 |
| 7  | <b>738.330461</b>  | 369.668869        |                |                   | 720.319896     | 360.663586       | D    | 1902.874949        | 951.941113         | 1885.848400    | 943.427838       | 1884.864384       | 942.935830       | 14 |
| 8  | <b>851.414525</b>  | 426.210901        |                |                   | 833.403960     | 417.205618       | L    | 1787.848006        | 894.427641         | 1770.821457    | 885.914367       | 1769.837441       | 885.422359       | 13 |
| 9  | <b>938.446553</b>  | 469.726915        |                |                   | 920.435988     | 460.721632       | S    | 1674.763942        | 837.885609         | 1657.737393    | 829.372335       | 1656.753377       | 828.880327       | 12 |
| 10 | 1053.473496        | 527.240386        |                |                   | 1035.462931    | 518.235104       | D    | <b>1587.731914</b> | 794.369595         | 1570.705365    | 785.856321       | 1569.721349       | 785.364313       | 11 |
| 11 | 1492.698822        | 746.853049        | 1475.672273    | <b>738.339775</b> | 1474.688257    | 737.847767       | Q    | 1472.704971        | 736.856124         | 1455.678422    | 728.342849       | 1454.694406       | 727.850841       | 10 |
| 12 | <b>1591.767236</b> | <b>796.387256</b> | 1574.740687    | 787.873982        | 1573.756671    | 787.381974       | V    | <b>1033.479645</b> | 517.243461         | 1016.453096    | 508.730186       | 1015.469080       | 508.238178       | 9  |
| 13 | 1688.820000        | 844.913638        | 1671.793451    | 836.400364        | 1670.809435    | 835.908356       | P    | <b>934.411231</b>  | <b>467.709254</b>  | 917.384682     | 459.195979       | <b>916.400666</b> | 458.703971       | 8  |
| 14 | 1803.846943        | 902.427110        | 1786.820394    | 893.913835        | 1785.836378    | 893.421827       | D    | <b>837.358467</b>  | 419.182872         | 820.331918     | 410.669597       | 819.347902        | 410.177589       | 7  |
| 15 | 1904.894622        | 952.950949        | 1887.868073    | 944.437675        | 1886.884057    | 943.945667       | T    | <b>722.331524</b>  | 361.669400         | 705.304975     | 353.156125       | 704.320959        | 352.664117       | 6  |
| 16 | 2033.937215        | 1017.472246       | 2016.910666    | 1008.958971       | 2015.926650    | 1008.466963      | E    | 621.283845         | 311.145560         | 604.257296     | 302.632286       | 603.273280        | 302.140278       | 5  |
| 17 | 2120.969243        | 1060.988259       | 2103.942694    | 1052.474985       | 2102.958678    | 1051.982977      | S    | <b>492.241252</b>  | 246.624264         | 475.214703     | 238.110989       | 474.230687        | 237.618981       | 4  |
| 18 | 2250.011836        | 1125.509556       | 2232.985287    | 1116.996281       | 2232.001271    | 1116.504274      | E    | 405.209224         | 203.108250         | 388.182675     | 194.594975       | 387.198659        | 194.102967       | 3  |
| 19 | 2351.059515        | 1176.033395       | 2334.032966    | 1167.520121       | 2333.048950    | 1167.028113      | T    | <b>276.166631</b>  | 138.586953         | 259.140082     | 130.073679       | 258.156066        | 129.581671       | 2  |
| 20 |                    |                   |                |                   |                |                  | R    | <b>175.118952</b>  | 88.063114          | 158.092403     | 79.549839        |                   |                  | 1  |

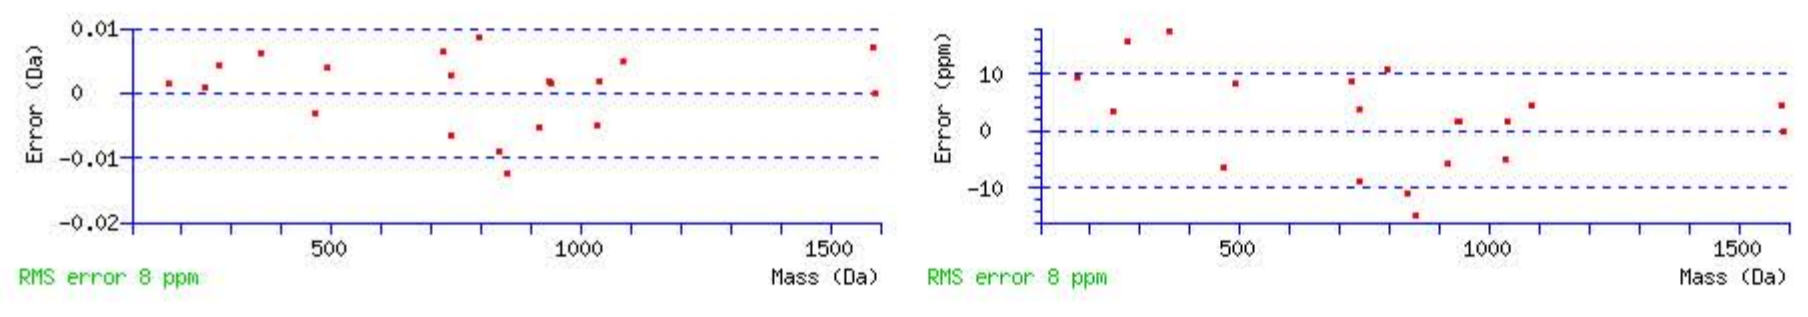

NCBI BLAST search of **EDIPPADLSDQVPDTESETR**  
 (Parameters: blastp, nr protein database, expect=20000, no filter, PAM30)  
 Other BLAST [web gateways](#)

**All matches to this query**

| Score | Mr(calc):   | Delta     | Sequence                    |
|-------|-------------|-----------|-----------------------------|
| 32.5  | 2524.163910 | -0.002058 | <b>EDIPPADLSDQVPDTESETR</b> |

# Mascot Search Results

## Peptide View

MS/MS Fragmentation of **VQLSNDFDEYIMAEQTIK**

Found in **CO3\_HUMAN**, Complement C3 OS=Homo sapiens GN=C3 PE=1 SV=2

Match to Query 49151: 2567.260932 from(856.760920,3+) rtinseconds(3286) index(39655)

Title: Locus:1.1.1.3802.13 File:"2013-07-02 CLN FXIII 180 min 3rd F 3.wiff"

Data file C:\Program Files (x86)\Matrix Science\Mascot Daemon\mgf9 FXIII 180 min 3rd\mascot\_daemon\_merge.mgf

Click mouse within plot area to zoom in by factor of two about that point

Or, Plot from 100 to 1700 Da Full range

Label all possible matches  Label matches used for scoring

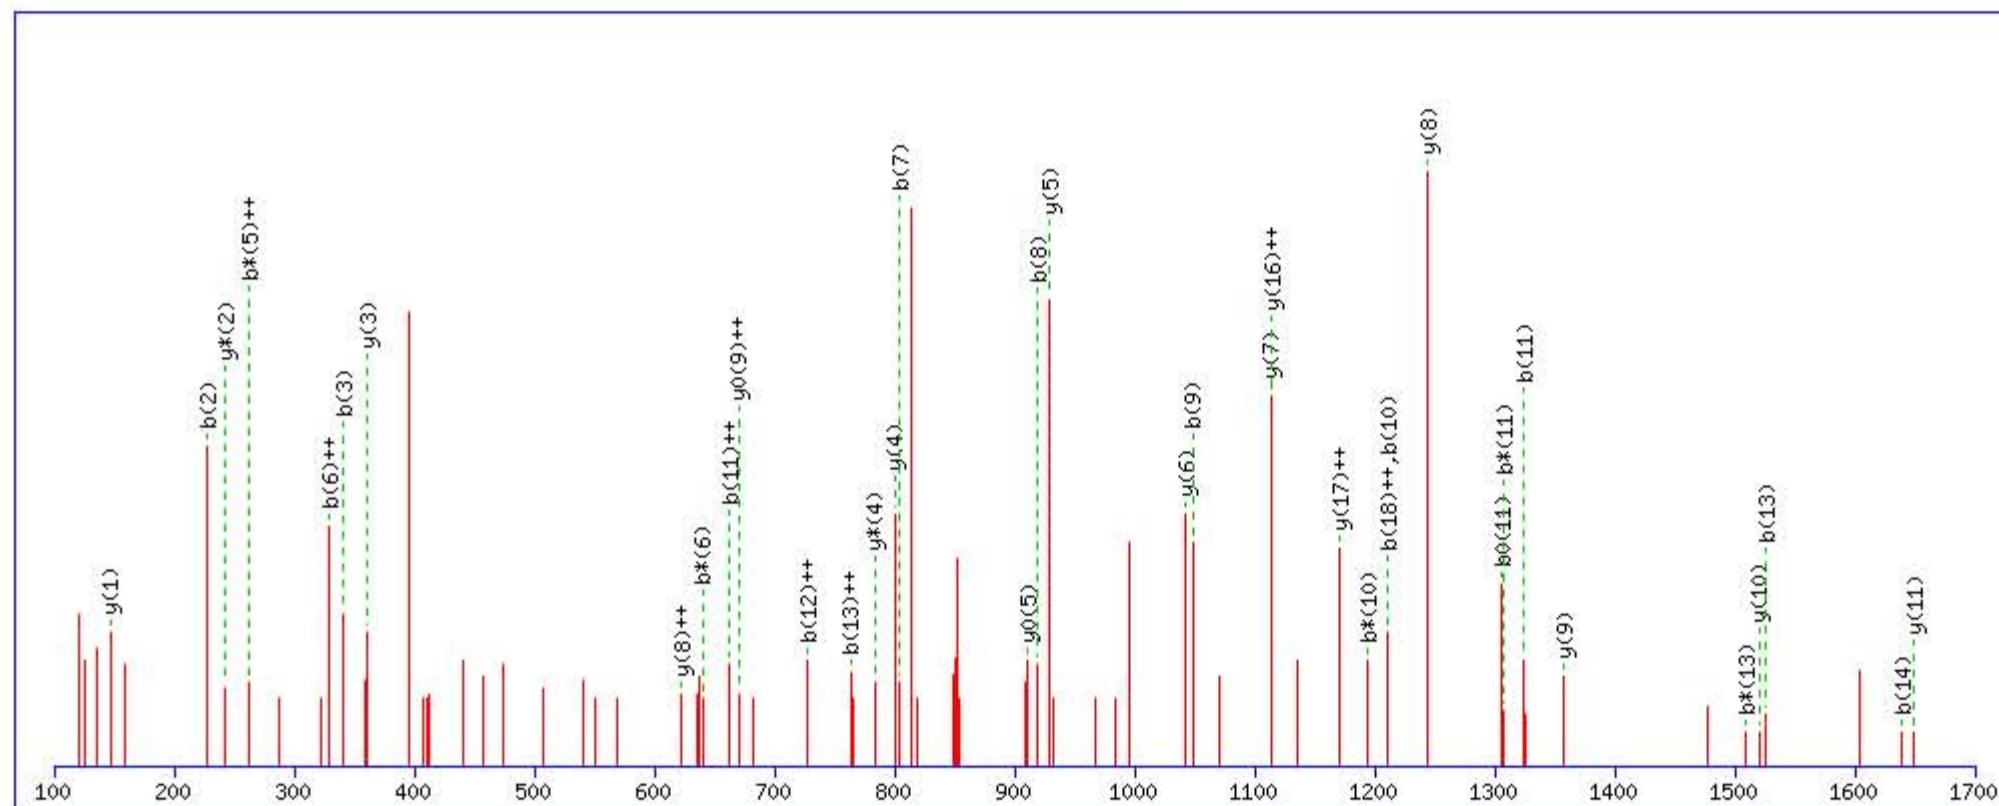

Monoisotopic mass of neutral peptide Mr(calc): 2567.265121

Fixed modifications: Carbamidomethyl (C) (apply to specified residues or termini only)

Variable modifications:

Q16 : Biotin:Thermo-21345 (Q)

Ions Score: 49 Expect: 2.8e-005

Matches : 37/204 fragment ions using 69 most intense peaks (help)

| #  | b                  | b <sup>++</sup>    | b <sup>*</sup>     | b <sup>+++</sup>  | b <sup>0</sup>     | b <sup>0++</sup> | Seq. | y                  | y <sup>++</sup>    | y <sup>*</sup>    | y <sup>+++</sup> | y <sup>0</sup>    | y <sup>0++</sup>  | #  |
|----|--------------------|--------------------|--------------------|-------------------|--------------------|------------------|------|--------------------|--------------------|-------------------|------------------|-------------------|-------------------|----|
| 1  | 100.075690         | 50.541483          |                    |                   |                    |                  | V    |                    |                    |                   |                  |                   |                   | 19 |
| 2  | <b>228.134268</b>  | 114.570772         | 211.107719         | 106.057498        |                    |                  | Q    | 2469.204012        | 1235.105644        | 2452.177463       | 1226.592369      | 2451.193447       | 1226.100361       | 18 |
| 3  | <b>341.218332</b>  | 171.112804         | 324.191783         | 162.599530        |                    |                  | L    | 2341.145434        | <b>1171.076355</b> | 2324.118885       | 1162.563080      | 2323.134869       | 1162.071072       | 17 |
| 4  | 428.250360         | 214.628818         | 411.223811         | 206.115544        | 410.239795         | 205.623536       | S    | 2228.061370        | <b>1114.534323</b> | 2211.034821       | 1106.021048      | 2210.050805       | 1105.529040       | 16 |
| 5  | 542.293287         | 271.650282         | 525.266738         | <b>263.137007</b> | 524.282722         | 262.644999       | N    | 2141.029342        | 1071.018309        | 2124.002793       | 1062.505034      | 2123.018777       | 1062.013026       | 15 |
| 6  | 657.320230         | <b>329.163753</b>  | <b>640.293681</b>  | 320.650479        | 639.309665         | 320.158471       | D    | 2026.986415        | 1013.996845        | 2009.959866       | 1005.483571      | 2008.975850       | 1004.991563       | 14 |
| 7  | <b>804.388644</b>  | 402.697960         | 787.362095         | 394.184686        | 786.378079         | 393.692678       | F    | 1911.959472        | 956.483374         | 1894.932923       | 947.970099       | 1893.948907       | 947.478091        | 13 |
| 8  | <b>919.415587</b>  | 460.211432         | 902.389038         | 451.698157        | 901.405022         | 451.206149       | D    | 1764.891058        | 882.949167         | 1747.864509       | 874.435893       | 1746.880493       | 873.943884        | 12 |
| 9  | <b>1048.458180</b> | 524.732728         | 1031.431631        | 516.219453        | 1030.447615        | 515.727445       | E    | <b>1649.864115</b> | 825.435695         | 1632.837566       | 816.922421       | 1631.853550       | 816.430413        | 11 |
| 10 | <b>1211.521509</b> | 606.264392         | <b>1194.494960</b> | 597.751118        | 1193.510944        | 597.259110       | Y    | <b>1520.821522</b> | 760.914399         | 1503.794973       | 752.401125       | 1502.810957       | 751.909116        | 10 |
| 11 | <b>1324.605573</b> | <b>662.806424</b>  | <b>1307.579024</b> | 654.293150        | <b>1306.595008</b> | 653.801142       | I    | <b>1357.758193</b> | 679.382734         | 1340.731644       | 670.869460       | 1339.747628       | <b>670.377452</b> | 9  |
| 12 | 1455.646058        | <b>728.326667</b>  | 1438.619509        | 719.813392        | 1437.635493        | 719.321384       | M    | <b>1244.674129</b> | <b>622.840703</b>  | 1227.647580       | 614.327428       | 1226.663564       | 613.835420        | 8  |
| 13 | <b>1526.683172</b> | <b>763.845224</b>  | <b>1509.656623</b> | 755.331949        | 1508.672607        | 754.839941       | A    | <b>1113.633644</b> | 557.320460         | 1096.607095       | 548.807186       | 1095.623079       | 548.315178        | 7  |
| 14 | <b>1639.767236</b> | 820.387256         | 1622.740687        | 811.873981        | 1621.756671        | 811.381973       | I    | <b>1042.596530</b> | 521.801903         | 1025.569981       | 513.288629       | 1024.585965       | 512.796621        | 6  |
| 15 | 1768.809829        | 884.908552         | 1751.783280        | 876.395278        | 1750.799264        | 875.903270       | E    | <b>929.512466</b>  | 465.259871         | 912.485917        | 456.746597       | <b>911.501901</b> | 456.254589        | 5  |
| 16 | 2208.035155        | 1104.521215        | 2191.008606        | 1096.007941       | 2190.024590        | 1095.515933      | Q    | <b>800.469873</b>  | 400.738575         | <b>783.443324</b> | 392.225300       | 782.459308        | 391.733292        | 4  |
| 17 | 2309.082834        | 1155.045055        | 2292.056285        | 1146.531780       | 2291.072269        | 1146.039772      | T    | <b>361.244547</b>  | 181.125911         | 344.217998        | 172.612637       | 343.233982        | 172.120629        | 3  |
| 18 | 2422.166898        | <b>1211.587087</b> | 2405.140349        | 1203.073812       | 2404.156333        | 1202.581804      | I    | 260.196868         | 130.602072         | <b>243.170319</b> | 122.088798       |                   |                   | 2  |
| 19 |                    |                    |                    |                   |                    |                  | K    | <b>147.112804</b>  | 74.060040          | 130.086255        | 65.546765        |                   |                   | 1  |

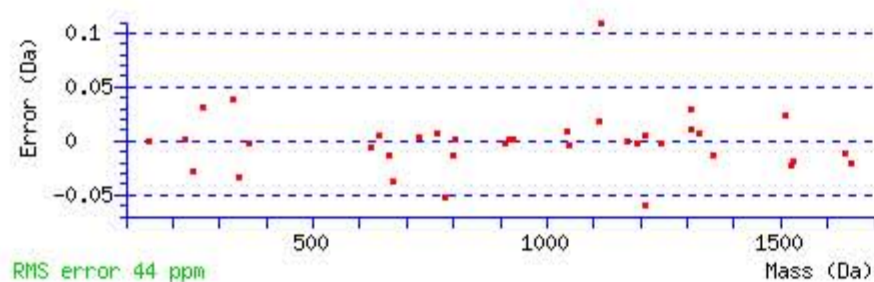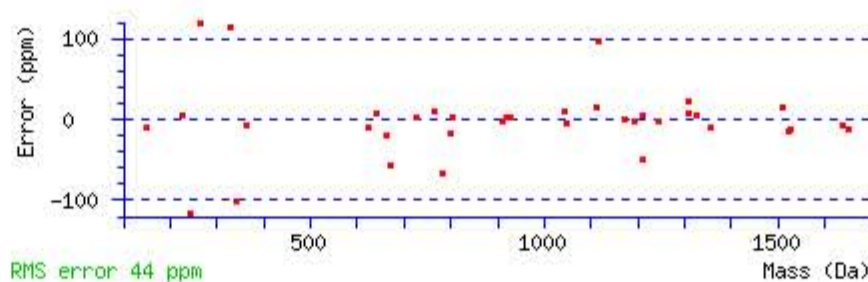

NCBI BLAST search of **VQLSNDFDEYIMAEQTIK**

(Parameters: blastp, nr protein database, expect=20000, no filter, PAM30)

Other BLAST [web gateways](#)

All matches to this query

| Score | Mr(calc):   | Delta     | Sequence                               |
|-------|-------------|-----------|----------------------------------------|
| 49.2  | 2567.265121 | -0.004189 | <a href="#">VQLSNDFDEYIMAEQTIK</a>     |
| 0.7   | 2567.264923 | -0.003991 | <a href="#">IQSDLTSHEISLEEMKKHNQGK</a> |

Mascot: <http://www.matrixscience.com/>





**Mascot Search Results**

**Peptide View**

MS/MS Fragmentation of **QKPDGVFQEDAPVIHQEMIGGLR**  
 Found in **CO3\_HUMAN**, Complement C3 OS=Homo sapiens GN=C3 PE=1 SV=2

Match to Query 52772: 2874.446696 from(719.618950,4+) rtinseconds(2248) index(33349)  
 Title: Locus:1.1.1.3446.8 File:"2013-07-02 CLN FXIII 180 min 3rd F 3.wiff"  
 Data file C:\Program Files (x86)\Matrix Science\Mascot Daemon\mgf9 FXIII 180 min 3rd\mascot\_daemon\_merge.mgf

Click mouse within plot area to zoom in by factor of two about that point  
 Or, Plot from  to  Da   
 Label all possible matches  Label matches used for scoring

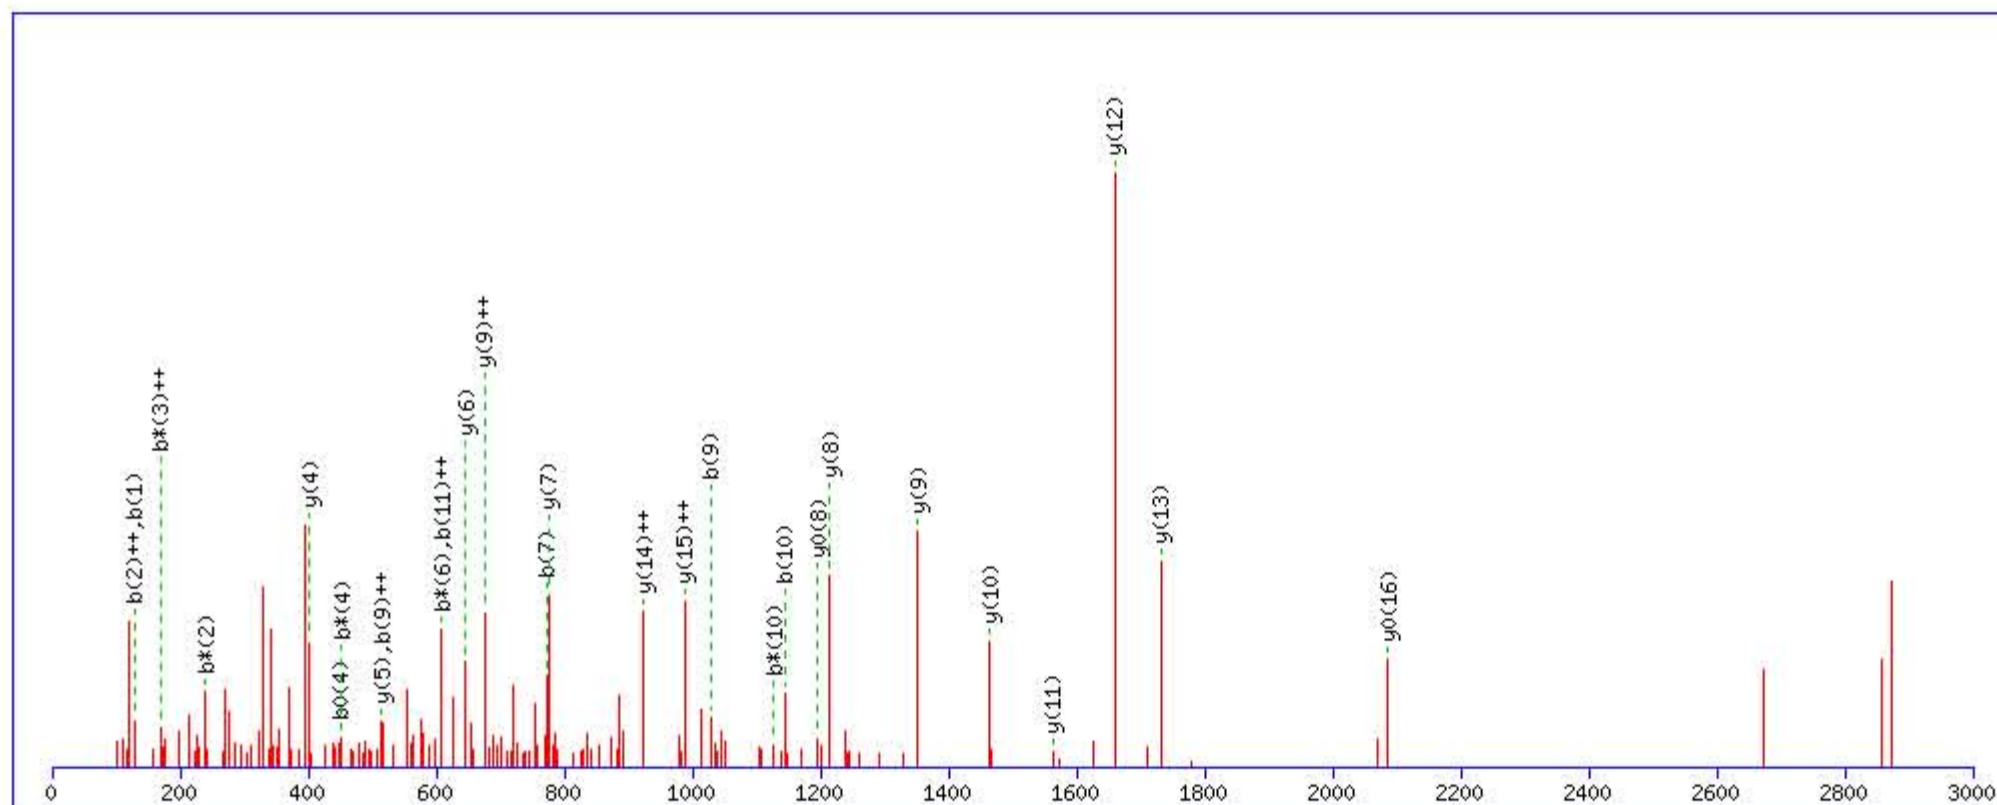

Monoisotopic mass of neutral peptide Mr(calc): 2874.452057  
 Fixed modifications: Carbamidomethyl (C) (apply to specified residues or termini only)  
 Variable modifications: Q16 : Biotin:Thermo-21345 (Q)  
 Ions Score: 43 Expect: 0.0014  
 Matches : 28/246 fragment ions using 51 most intense peaks [\(help\)](#)

| #  | b           | b <sup>++</sup> | b <sup>+</sup> | b <sup>***</sup> | b <sup>0</sup> | b <sup>0++</sup> | Seq. | y           | y <sup>++</sup> | y <sup>+</sup> | y <sup>***</sup> | y <sup>0</sup> | y <sup>0++</sup> | #  |
|----|-------------|-----------------|----------------|------------------|----------------|------------------|------|-------------|-----------------|----------------|------------------|----------------|------------------|----|
| 1  | 129.065854  | 65.036565       | 112.039305     | 56.523291        |                |                  | Q    |             |                 |                |                  |                |                  | 23 |
| 2  | 257.160817  | 129.084047      | 240.134268     | 120.570772       |                |                  | K    | 2747.400756 | 1374.204016     | 2730.374207    | 1365.690741      | 2729.390191    | 1365.198733      | 22 |
| 3  | 354.213581  | 177.610429      | 337.187032     | 169.097154       |                |                  | P    | 2619.305793 | 1310.156534     | 2602.279244    | 1301.643260      | 2601.295228    | 1301.151252      | 21 |
| 4  | 469.240524  | 235.123900      | 452.213975     | 226.610626       | 451.229959     | 226.118618       | D    | 2522.253029 | 1261.630152     | 2505.226480    | 1253.116878      | 2504.242464    | 1252.624870      | 20 |
| 5  | 526.261988  | 263.634632      | 509.235439     | 255.121358       | 508.251423     | 254.629350       | G    | 2407.226086 | 1204.116681     | 2390.199537    | 1195.603406      | 2389.215521    | 1195.111398      | 19 |
| 6  | 625.330402  | 313.168839      | 608.303853     | 304.655565       | 607.319837     | 304.163557       | V    | 2350.204622 | 1175.605949     | 2333.178073    | 1167.092674      | 2332.194057    | 1166.600666      | 18 |
| 7  | 772.398816  | 386.703046      | 755.372267     | 378.189772       | 754.388251     | 377.697764       | F    | 2251.136208 | 1126.071742     | 2234.109659    | 1117.558467      | 2233.125643    | 1117.066459      | 17 |
| 8  | 900.457394  | 450.732335      | 883.430845     | 442.219061       | 882.446829     | 441.727053       | Q    | 2104.067794 | 1052.537535     | 2087.041245    | 1044.024260      | 2086.057229    | 1043.532252      | 16 |
| 9  | 1029.499987 | 515.253631      | 1012.473438    | 506.740357       | 1011.489422    | 506.248349       | E    | 1976.009216 | 988.508246      | 1958.982667    | 979.994972       | 1957.998651    | 979.502964       | 15 |
| 10 | 1144.526930 | 572.767103      | 1127.500381    | 564.253829       | 1126.516365    | 563.761821       | D    | 1846.966623 | 923.986950      | 1829.940074    | 915.473675       | 1828.956058    | 914.981667       | 14 |
| 11 | 1215.564044 | 608.285660      | 1198.537495    | 599.772386       | 1197.553479    | 599.280377       | A    | 1731.939680 | 866.473478      | 1714.913131    | 857.960204       | 1713.929115    | 857.468196       | 13 |
| 12 | 1312.616808 | 656.812042      | 1295.590259    | 648.298768       | 1294.606243    | 647.806760       | P    | 1660.902566 | 830.954921      | 1643.876017    | 822.441647       | 1642.892001    | 821.949639       | 12 |
| 13 | 1411.685222 | 706.346249      | 1394.658673    | 697.832975       | 1393.674657    | 697.340967       | V    | 1563.849802 | 782.428539      | 1546.823253    | 773.915265       | 1545.839237    | 773.423257       | 11 |
| 14 | 1524.769286 | 762.888281      | 1507.742737    | 754.375007       | 1506.758721    | 753.882998       | I    | 1464.781388 | 732.894332      | 1447.754839    | 724.381058       | 1446.770823    | 723.889050       | 10 |
| 15 | 1661.828198 | 831.417737      | 1644.801649    | 822.904463       | 1643.817633    | 822.412454       | H    | 1351.697324 | 676.352300      | 1334.670775    | 667.839026       | 1333.686759    | 667.347018       | 9  |
| 16 | 2101.053524 | 1051.030400     | 2084.026975    | 1042.517125      | 2083.042959    | 1042.025117      | Q    | 1214.638412 | 607.822844      | 1197.611863    | 599.309570       | 1196.627847    | 598.817562       | 8  |
| 17 | 2230.096117 | 1115.551696     | 2213.069568    | 1107.038422      | 2212.085552    | 1106.546414      | E    | 775.413086  | 388.210181      | 758.386537     | 379.696907       | 757.402521     | 379.204899       | 7  |
| 18 | 2361.136602 | 1181.071939     | 2344.110053    | 1172.558664      | 2343.126037    | 1172.066656      | M    | 646.370493  | 323.688885      | 629.343944     | 315.175610       |                |                  | 6  |
| 19 | 2474.220666 | 1237.613971     | 2457.194117    | 1229.100696      | 2456.210101    | 1228.608689      | I    | 515.330008  | 258.168642      | 498.303459     | 249.655368       |                |                  | 5  |
| 20 | 2531.242130 | 1266.124703     | 2514.215581    | 1257.611428      | 2513.231565    | 1257.119420      | G    | 402.245944  | 201.626610      | 385.219395     | 193.113335       |                |                  | 4  |
| 21 | 2588.263594 | 1294.635435     | 2571.237045    | 1286.122160      | 2570.253029    | 1285.630152      | G    | 345.224480  | 173.115878      | 328.197931     | 164.602603       |                |                  | 3  |
| 22 | 2701.347658 | 1351.177467     | 2684.321109    | 1342.664192      | 2683.337093    | 1342.172185      | L    | 288.203016  | 144.605146      | 271.176467     | 136.091872       |                |                  | 2  |
| 23 |             |                 |                |                  |                |                  | R    | 175.118952  | 88.063114       | 158.092403     | 79.549839        |                |                  | 1  |

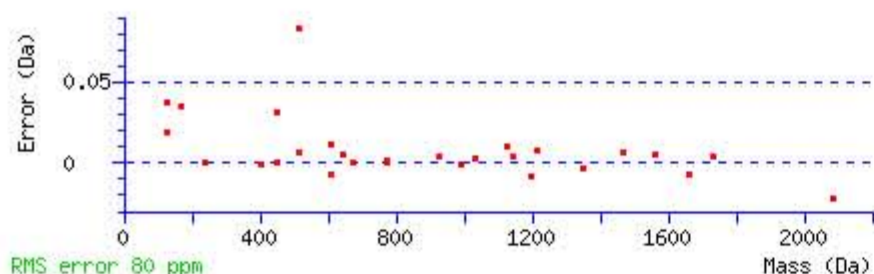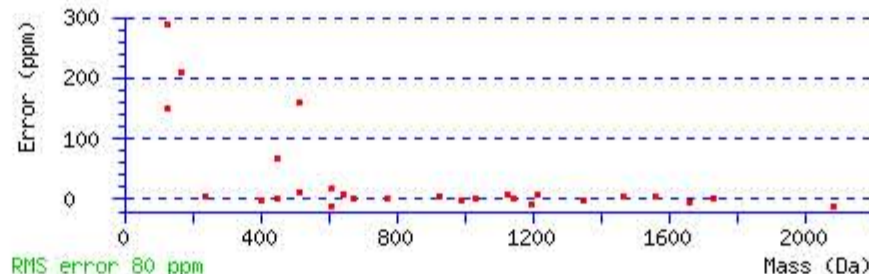

NCBI BLAST search of **QKPDGVFQEDAPVIHQEMIGGLR**  
 (Parameters: blastp, nr protein database, expect=20000, no filter, PAM30)  
 Other BLAST [web gateways](#)

**All matches to this query**

| Score | Mr(calc):   | Delta     | Sequence                                |
|-------|-------------|-----------|-----------------------------------------|
| 43.3  | 2874.452057 | -0.005361 | <a href="#">QKPDGVFQEDAPVIHQEMIGGLR</a> |
| 3.0   | 2874.452057 | -0.005361 | <a href="#">QKPDGVFQEDAPVIHQEMIGGLR</a> |

# **MASCOT** Mascot Search Results

## Peptide View

MS/MS Fragmentation of **GQAGLQR**

Found in **CO4A\_HUMAN**, Complement C4-A OS=Homo sapiens GN=C4A PE=1 SV=2

Match to Query 12627: 1039.550328 from(520.782440,2+) rtinseconds(1460) index(42646)

Title: Locus:1.1.1.3221.5 File:"2013-07-02 CLN FXIII 180 min 3rd F 4.wiff"

Data file C:\Program Files (x86)\Matrix Science\Mascot Daemon\mgf9 FXIII 180 min 3rd\mascot\_daemon\_merge.mgf

Click mouse within plot area to zoom in by factor of two about that point

Or, Plot from  to  Da

Label all possible matches  Label matches used for scoring

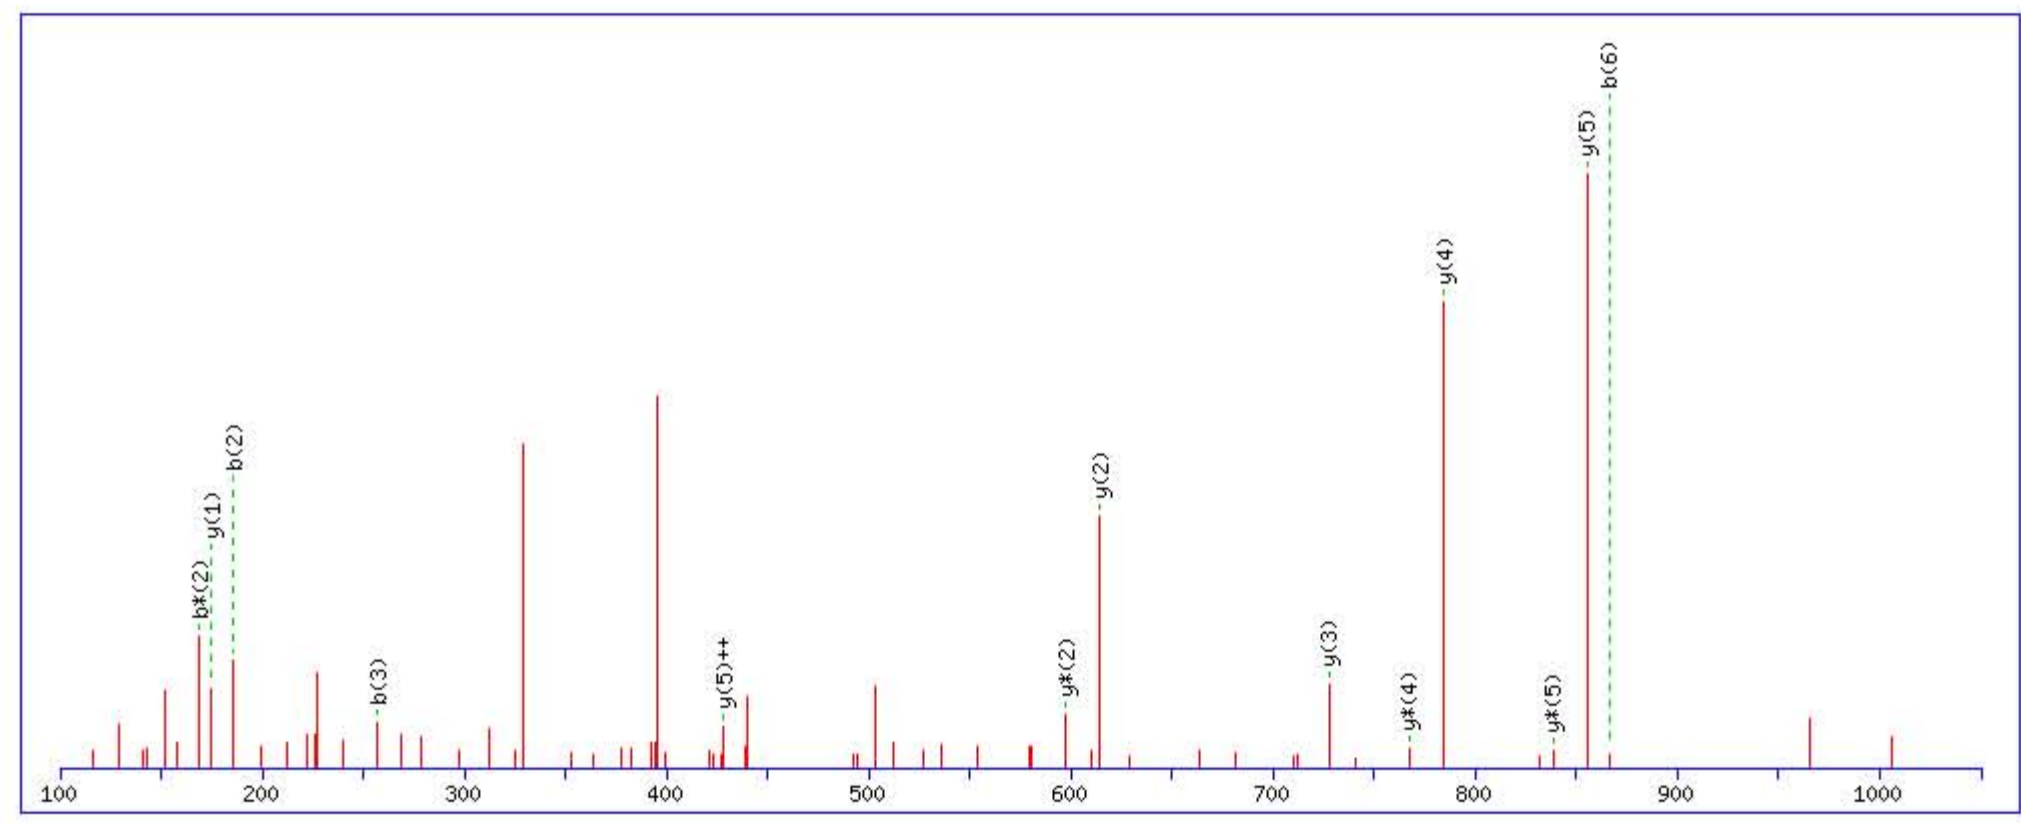

Monoisotopic mass of neutral peptide Mr(calc): 1039.559677

Fixed modifications: Carbamidomethyl (C) (apply to specified residues or termini only)

Variable modifications:

Q6 : Biotin:Thermo-21345 (Q)

Ions Score: 27 Expect: 0.028

Matches : 13/46 fragment ions using 26 most intense peaks [\(help\)](#)

| # | b                 | b <sup>++</sup> | b <sup>*</sup>    | b <sup>*++</sup> | Seq.     | y                 | y <sup>++</sup>   | y <sup>*</sup>    | y <sup>*++</sup> | # |
|---|-------------------|-----------------|-------------------|------------------|----------|-------------------|-------------------|-------------------|------------------|---|
| 1 | 58.028740         | 29.518008       |                   |                  | <b>G</b> |                   |                   |                   |                  | 7 |
| 2 | <b>186.087318</b> | 93.547297       | <b>169.060769</b> | 85.034023        | <b>Q</b> | 983.545498        | 492.276387        | 966.518949        | 483.763113       | 6 |
| 3 | <b>257.124432</b> | 129.065854      | 240.097883        | 120.552580       | <b>A</b> | <b>855.486920</b> | <b>428.247098</b> | <b>838.460371</b> | 419.733824       | 5 |
| 4 | 314.145896        | 157.576586      | 297.119347        | 149.063312       | <b>G</b> | <b>784.449806</b> | 392.728541        | <b>767.423257</b> | 384.215267       | 4 |
| 5 | 427.229960        | 214.118618      | 410.203411        | 205.605344       | <b>L</b> | <b>727.428342</b> | 364.217809        | 710.401793        | 355.704535       | 3 |
| 6 | <b>866.455286</b> | 433.731281      | 849.428737        | 425.218007       | <b>Q</b> | <b>614.344278</b> | 307.675777        | <b>597.317729</b> | 299.162503       | 2 |
| 7 |                   |                 |                   |                  | <b>R</b> | <b>175.118952</b> | 88.063114         | 158.092403        | 79.549840        | 1 |

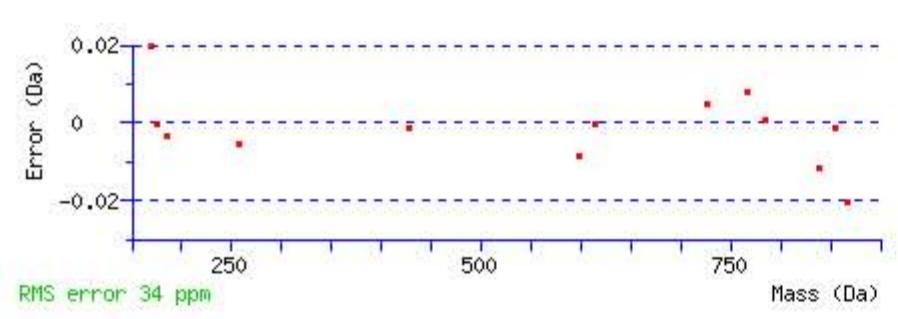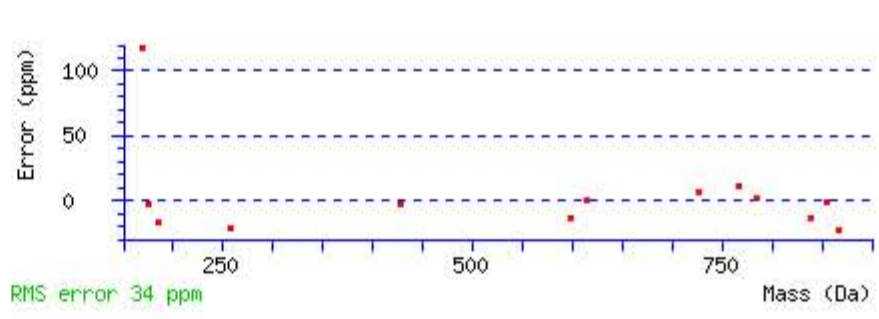

NCBI BLAST search of **GQAGLQR**

(Parameters: blastp, nr protein database, expect=20000, no filter, PAM30)

Other BLAST [web gateways](#)

### All matches to this query

| Score | Mr(calc):   | Delta     | Sequence                    |
|-------|-------------|-----------|-----------------------------|
| 26.9  | 1039.559677 | -0.009349 | <a href="#">GQAGLQR</a>     |
| 14.2  | 1039.559677 | -0.009349 | <a href="#">GQQIQR</a>      |
| 10.9  | 1039.541061 | 0.009267  | <a href="#">GQGDLLQPGR</a>  |
| 7.0   | 1039.559677 | -0.009349 | <a href="#">KGGPSQR</a>     |
| 6.8   | 1039.541046 | 0.009282  | <a href="#">NATTAPNPVR</a>  |
| 5.3   | 1039.552277 | -0.001949 | <a href="#">GQPQELGRR</a>   |
| 4.3   | 1039.552277 | -0.001949 | <a href="#">QRAALDGGPR</a>  |
| 1.8   | 1039.563492 | -0.013164 | <a href="#">AEGARARGPR</a>  |
| 1.8   | 1039.563492 | -0.013164 | <a href="#">SSHLRERR</a>    |
| 1.5   | 1039.541061 | 0.009267  | <a href="#">AGVTTPAPGNR</a> |



# MASCOT SEARCH RESULTS

## Peptide View

MS/MS Fragmentation of **AAANQMR**

Found in **CO4A\_HUMAN**, Complement C4-A OS=Homo sapiens GN=C4A PE=1 SV=2

Match to Query 13331: 1071.528988 from(536.771770,2+) rtinseconds(1406) index(42337)

Title: Locus:1.1.1.3202.12 File:"2013-07-02 CLN FXIII 180 min 3rd F 4.wiff"

Data file C:\Program Files (x86)\Matrix Science\Mascot Daemon\mgf9 FXIII 180 min 3rd\mascot\_daemon\_merge.mgf

Click mouse within plot area to zoom in by factor of two about that point

Or, Plot from  to  Da

Label all possible matches  Label matches used for scoring

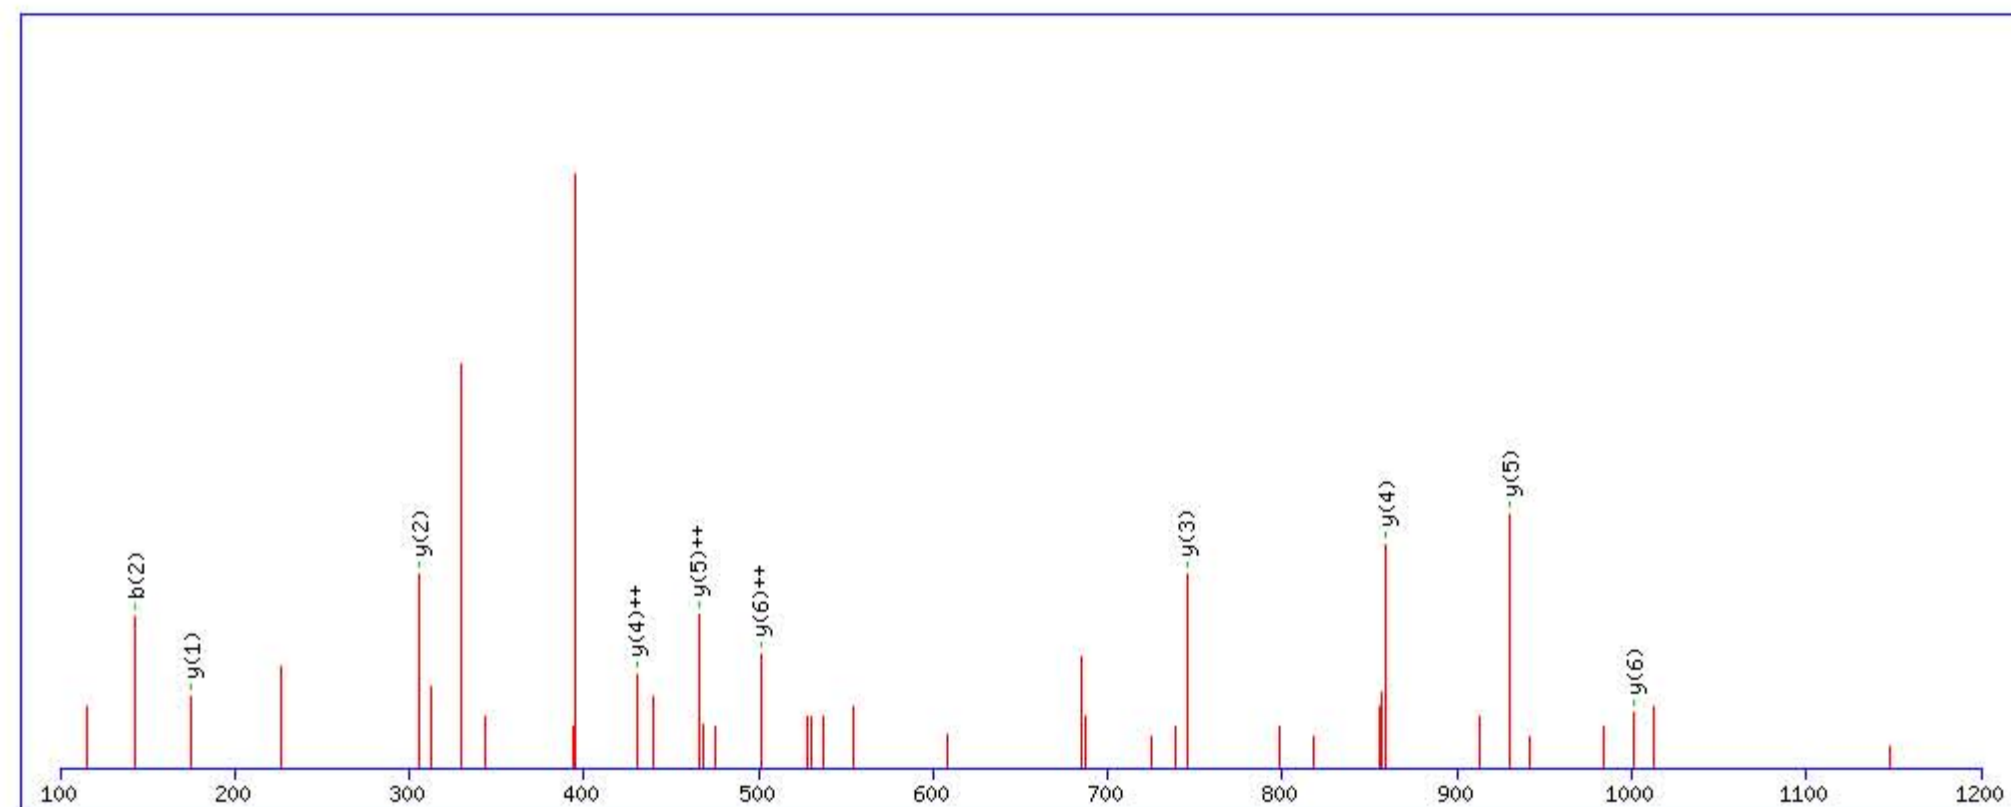

Monoisotopic mass of neutral peptide Mr(calc): 1071.531723

Fixed modifications: Carbamidomethyl (C) (apply to specified residues or termini only)

Variable modifications:

Q5 : Biotin:Thermo-21345 (Q)

Ions Score: 29 Expect: 0.024

Matches : 10/42 fragment ions using 26 most intense peaks [\(help\)](#)

| # | b          | b <sup>++</sup> | b <sup>*</sup> | b <sup>*++</sup> | Seq. | y           | y <sup>++</sup> | y <sup>*</sup> | y <sup>*++</sup> | # |
|---|------------|-----------------|----------------|------------------|------|-------------|-----------------|----------------|------------------|---|
| 1 | 72.044390  | 36.525833       |                |                  | A    |             |                 |                |                  | 7 |
| 2 | 143.081504 | 72.044390       |                |                  | A    | 1001.501918 | 501.254597      | 984.475369     | 492.741323       | 6 |
| 3 | 214.118618 | 107.562947      |                |                  | A    | 930.464804  | 465.736040      | 913.438255     | 457.222766       | 5 |
| 4 | 328.161545 | 164.584410      | 311.134996     | 156.071136       | N    | 859.427690  | 430.217483      | 842.401141     | 421.704209       | 4 |
| 5 | 767.386871 | 384.197074      | 750.360322     | 375.683799       | Q    | 745.384763  | 373.196020      | 728.358214     | 364.682745       | 3 |
| 6 | 898.427356 | 449.717316      | 881.400807     | 441.204042       | M    | 306.159437  | 153.583357      | 289.132888     | 145.070082       | 2 |
| 7 |            |                 |                |                  | R    | 175.118952  | 88.063114       | 158.092403     | 79.549840        | 1 |

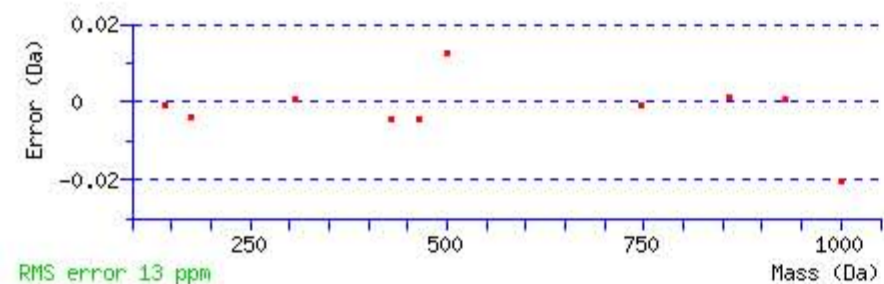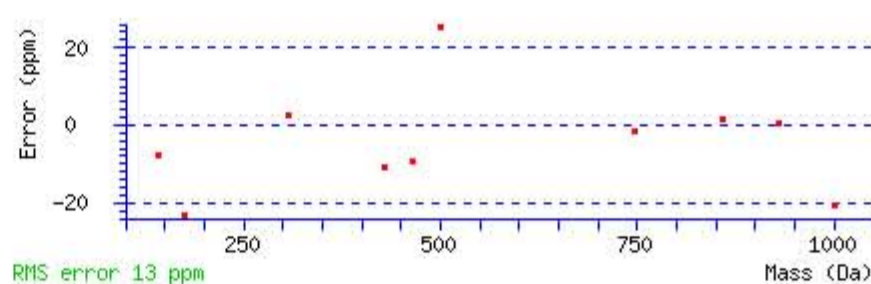

NCBI BLAST search of [AAANQMR](#)

(Parameters: blastp, nr protein database, expect=20000, no filter, PAM30)

Other BLAST [web gateways](#)

## All matches to this query

| Score | Mr(calc):   | Delta     | Sequence                    |
|-------|-------------|-----------|-----------------------------|
| 28.6  | 1071.531723 | -0.002735 | <a href="#">AAANQMR</a>     |
| 15.9  | 1071.530853 | -0.001865 | <a href="#">AAEESGAKGPR</a> |
| 5.4   | 1071.519608 | 0.009380  | <a href="#">AAESAEIEPR</a>  |
| 5.4   | 1071.539597 | -0.010609 | <a href="#">HHLIEHMR</a>    |

Mascot: <http://www.matrixscience.com/>

# MASCOT SCIENCE Mascot Search Results

## Peptide View

MS/MS Fragmentation of **VQQPDCR**

Found in **CO4A\_HUMAN**, Complement C4-A OS=Homo sapiens GN=C4A PE=1 SV=2

Match to Query 17990: 1212.569008 from(607.291780,2+) rtinseconds(1327) index(41941)

Title: Locus:1.1.1.3174.14 File:"2013-07-02 CLN FXIII 180 min 3rd F 4.wiff"

Data file C:\Program Files (x86)\Matrix Science\Mascot Daemon\mgf\9 FXIII 180 min 3rd\mascot\_daemon\_merge.mgf

Click mouse within plot area to zoom in by factor of two about that point

Or, Plot from  to  Da

Label all possible matches  Label matches used for scoring

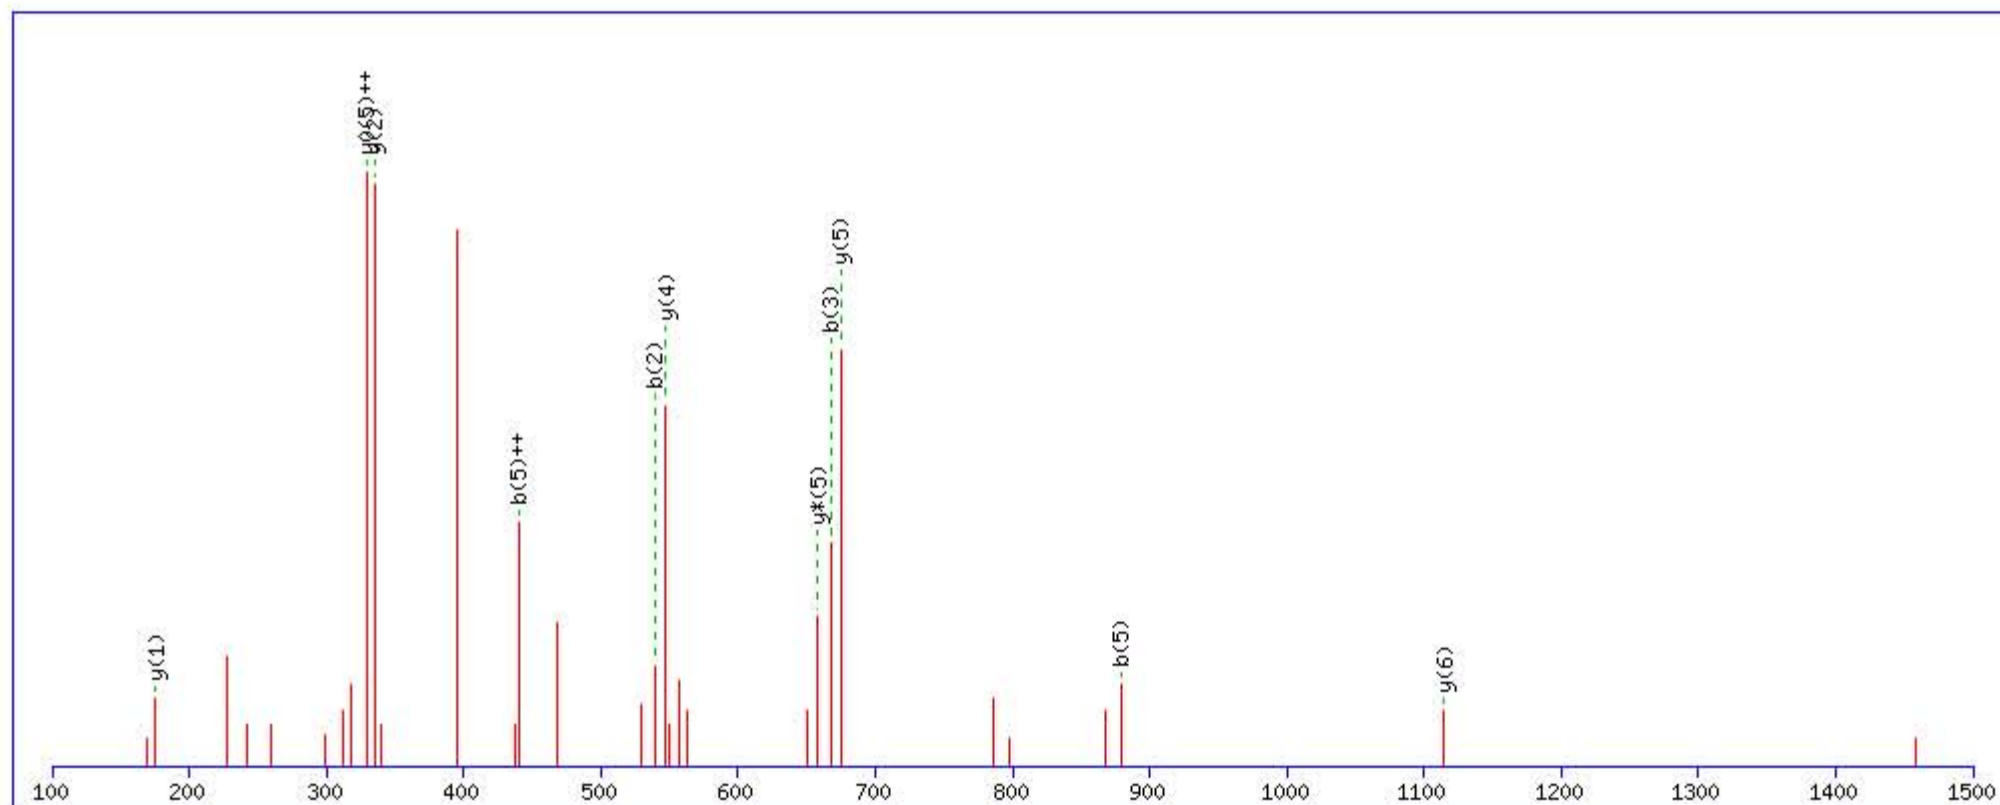

Monoisotopic mass of neutral peptide Mr(calc): 1212.574356

Fixed modifications: Carbamidomethyl (C) (apply to specified residues or termini only)

Variable modifications:

Q2 : Biotin:Thermo-21345 (Q)

Ions Score: 35 Expect: 0.00063

Matches : 11/58 fragment ions using 15 most intense peaks [\(help\)](#)

| # | b                 | b <sup>++</sup>   | b <sup>*</sup> | b <sup>*++</sup> | b <sup>0</sup> | b <sup>0++</sup> | Seq. | y                  | y <sup>++</sup> | y <sup>*</sup>    | y <sup>*++</sup> | y <sup>0</sup> | y <sup>0++</sup>  | # |
|---|-------------------|-------------------|----------------|------------------|----------------|------------------|------|--------------------|-----------------|-------------------|------------------|----------------|-------------------|---|
| 1 | 100.075690        | 50.541483         |                |                  |                |                  | V    |                    |                 |                   |                  |                |                   | 7 |
| 2 | <b>539.301016</b> | 270.154146        | 522.274467     | 261.640872       |                |                  | Q    | <b>1114.513212</b> | 557.760244      | 1097.486663       | 549.246970       | 1096.502647    | 548.754962        | 6 |
| 3 | <b>667.359594</b> | 334.183435        | 650.333045     | 325.670161       |                |                  | Q    | <b>675.287886</b>  | 338.147581      | <b>658.261337</b> | 329.634307       | 657.277321     | <b>329.142299</b> | 5 |
| 4 | 764.412358        | 382.709817        | 747.385809     | 374.196543       |                |                  | P    | <b>547.229308</b>  | 274.118292      | 530.202759        | 265.605018       | 529.218743     | 265.113010        | 4 |
| 5 | <b>879.439301</b> | <b>440.223289</b> | 862.412752     | 431.710014       | 861.428736     | 431.218006       | D    | 450.176544         | 225.591910      | 433.149995        | 217.078635       | 432.165979     | 216.586627        | 3 |
| 6 | 1039.469950       | 520.238613        | 1022.443401    | 511.725339       | 1021.459385    | 511.233331       | C    | <b>335.149601</b>  | 168.078438      | 318.123052        | 159.565164       |                |                   | 2 |
| 7 |                   |                   |                |                  |                |                  | R    | <b>175.118952</b>  | 88.063114       | 158.092403        | 79.549839        |                |                   | 1 |

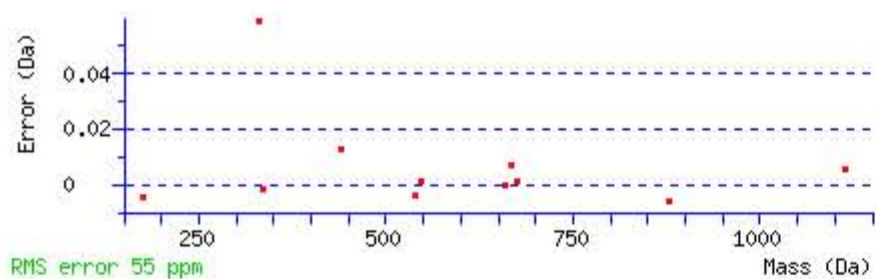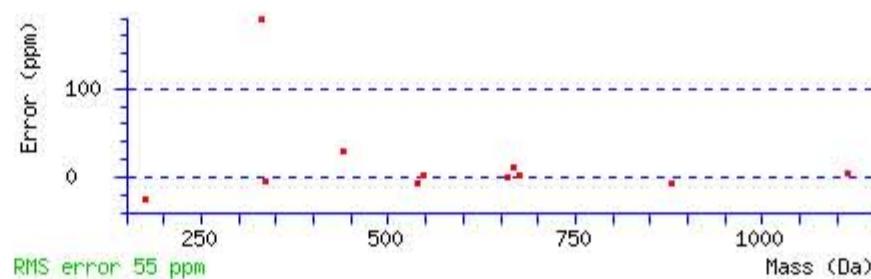

NCBI BLAST search of **VQQPDCR**

(Parameters: blastp, nr protein database, expect=20000, no filter, PAM30)

Other BLAST [web gateways](#)

All matches to this query

| Score | Mr(calc):   | Delta     | Sequence                   |
|-------|-------------|-----------|----------------------------|
| 34.8  | 1212.574356 | -0.005348 | <a href="#">VQQPDCR</a>    |
| 15.7  | 1212.574356 | -0.005348 | <a href="#">VQQPDCR</a>    |
| 0.7   | 1212.582199 | -0.013191 | <a href="#">GRMPPSEFHR</a> |

# MASCOT SEARCH RESULTS

## Peptide View

MS/MS Fragmentation of **VEYGFQVK**

Found in **CO4A\_HUMAN**, Complement C4-A OS=Homo sapiens GN=C4A PE=1 SV=2

Match to Query 19793: 1279.659568 from(640.837060,2+) rtinseconds(2000) index(31887)

Title: Locus:1.1.1.3360.9 File:"2013-07-02 CLN FXIII 180 min 3rd F 3.wiff"

Data file C:\Program Files (x86)\Matrix Science\Mascot Daemon\mgf\9 FXIII 180 min 3rd\mascot\_daemon\_merge.mgf

Click mouse within plot area to zoom in by factor of two about that point

Or, Plot from  to  Da

Label all possible matches  Label matches used for scoring

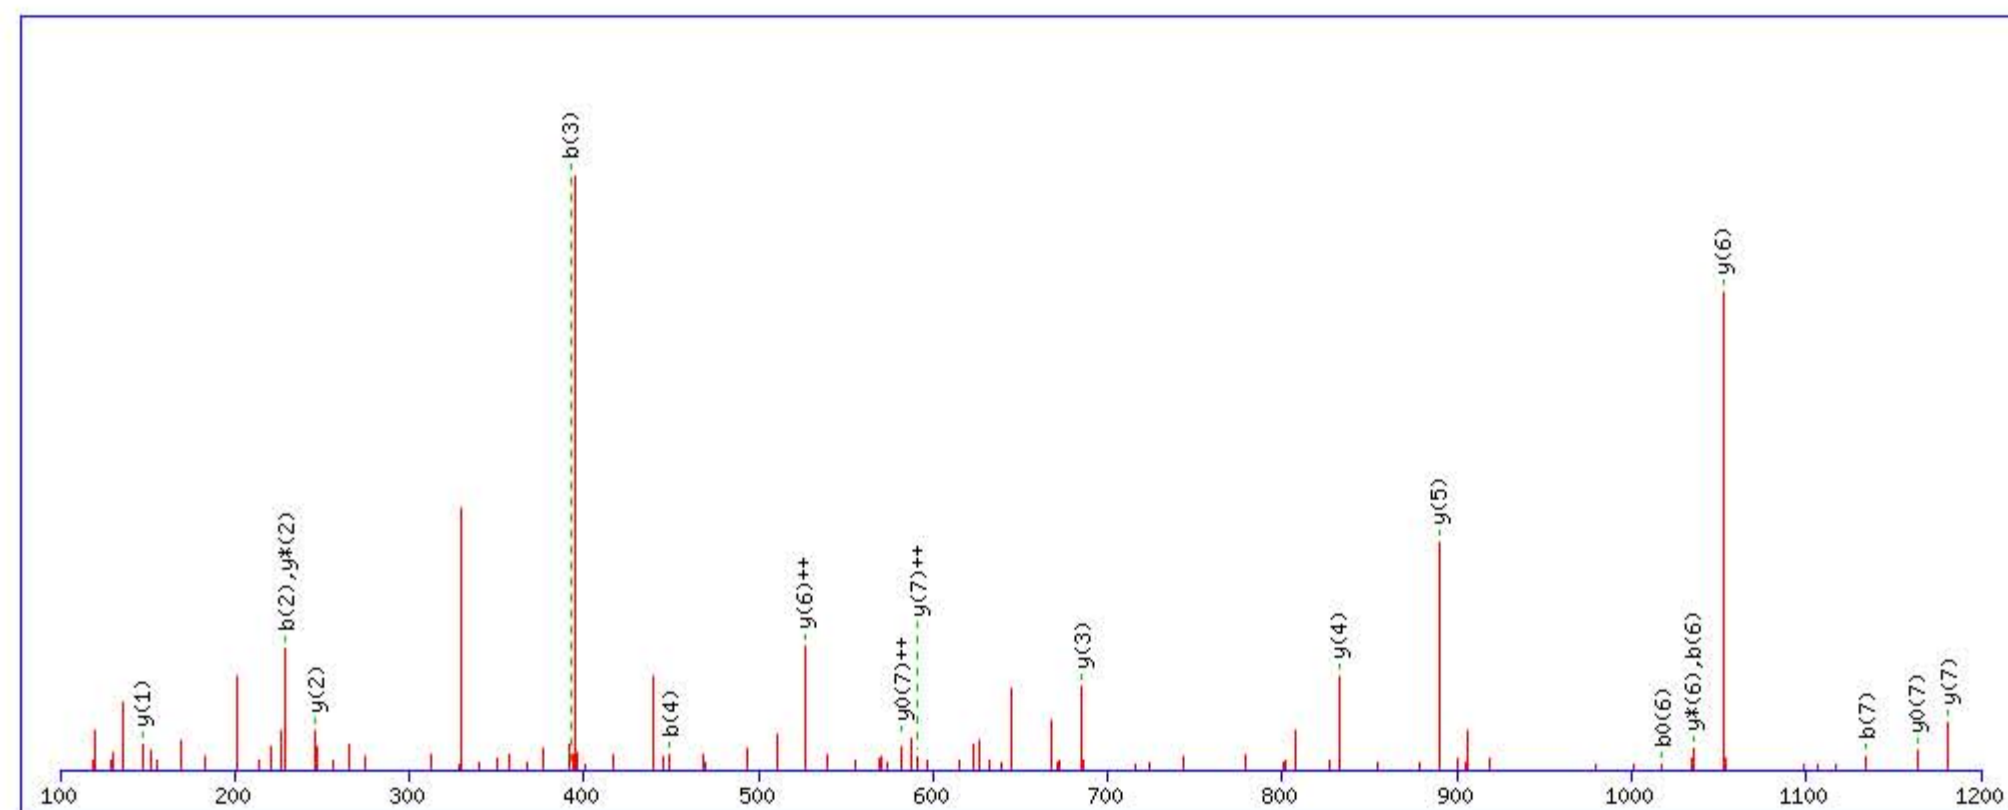

Monoisotopic mass of neutral peptide Mr(calc): 1279.663483

Fixed modifications: Carbamidomethyl (C) (apply to specified residues or termini only)

Variable modifications:

Q6 : Biotin:Thermo-21345 (Q)

Ions Score: 26 Expect: 0.01

Matches : 19/60 fragment ions using 51 most intense peaks [\(help\)](#)

| # | b                  | b <sup>++</sup> | b <sup>*</sup> | b <sup>*++</sup> | b <sup>0</sup>     | b <sup>0++</sup> | Seq. | y                  | y <sup>++</sup>   | y <sup>*</sup>     | y <sup>*++</sup> | y <sup>0</sup>     | y <sup>0++</sup>  | # |
|---|--------------------|-----------------|----------------|------------------|--------------------|------------------|------|--------------------|-------------------|--------------------|------------------|--------------------|-------------------|---|
| 1 | 100.075690         | 50.541483       |                |                  |                    |                  | V    |                    |                   |                    |                  |                    |                   | 8 |
| 2 | <b>229.118283</b>  | 115.062780      |                |                  | 211.107718         | 106.057497       | E    | <b>1181.602344</b> | <b>591.304810</b> | 1164.575795        | 582.791536       | <b>1163.591779</b> | <b>582.299528</b> | 7 |
| 3 | <b>392.181612</b>  | 196.594444      |                |                  | 374.171047         | 187.589162       | Y    | <b>1052.559751</b> | <b>526.783514</b> | <b>1035.533202</b> | 518.270239       |                    |                   | 6 |
| 4 | <b>449.203076</b>  | 225.105176      |                |                  | 431.192511         | 216.099894       | G    | <b>889.496422</b>  | 445.251849        | 872.469873         | 436.738575       |                    |                   | 5 |
| 5 | 596.271490         | 298.639383      |                |                  | 578.260925         | 289.634101       | F    | <b>832.474958</b>  | 416.741117        | 815.448409         | 408.227843       |                    |                   | 4 |
| 6 | <b>1035.496816</b> | 518.252046      | 1018.470267    | 509.738772       | <b>1017.486251</b> | 509.246764       | Q    | <b>685.406544</b>  | 343.206910        | 668.379995         | 334.693636       |                    |                   | 3 |
| 7 | <b>1134.565230</b> | 567.786253      | 1117.538681    | 559.272979       | 1116.554665        | 558.780971       | V    | <b>246.181218</b>  | 123.594247        | <b>229.154669</b>  | 115.080973       |                    |                   | 2 |
| 8 |                    |                 |                |                  |                    |                  | K    | <b>147.112804</b>  | 74.060040         | 130.086255         | 65.546765        |                    |                   | 1 |

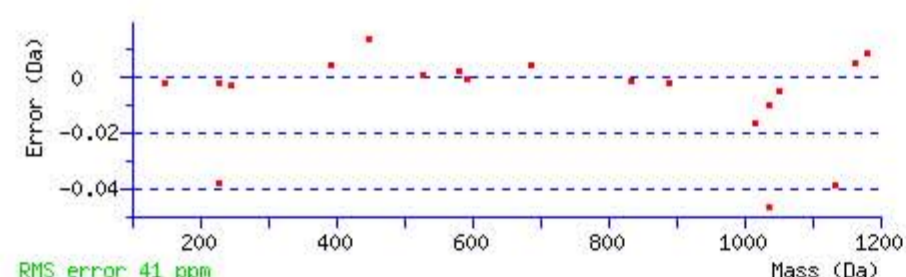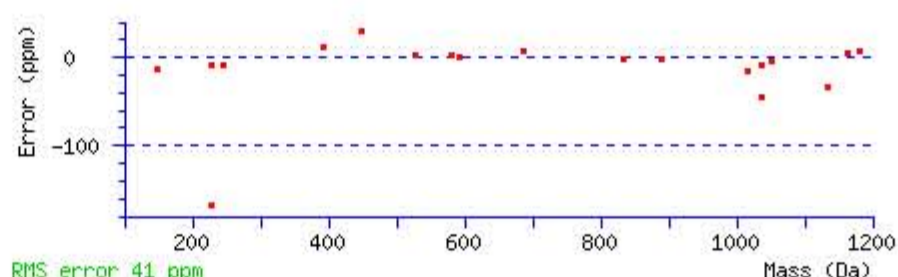

NCBI BLAST search of **VEYGFQVK**

(Parameters: blastp, nr protein database, expect=20000, no filter, PAM30)

Other BLAST [web gateways](#)

All matches to this query

| Score | Mr(calc):   | Delta     | Sequence                     |
|-------|-------------|-----------|------------------------------|
| 25.6  | 1279.663483 | -0.003915 | <a href="#">VEYGFQVK</a>     |
| 4.1   | 1279.663483 | -0.003915 | <a href="#">QFVGYLDK</a>     |
| 2.1   | 1279.677216 | -0.017648 | <a href="#">VFKTEDTQGKK</a>  |
| 0.5   | 1279.659470 | 0.000098  | <a href="#">VCSFGKQVVEK</a>  |
| 0.4   | 1279.652039 | 0.007529  | <a href="#">VERAITEASPAH</a> |
| 0.3   | 1279.652054 | 0.007514  | <a href="#">DAHDPQDKKVK</a>  |
| 0.1   | 1279.677200 | -0.017632 | <a href="#">EYVGKTSLVER</a>  |

# Mascot Search Results

## Peptide View

MS/MS Fragmentation of **VVEEQESR**

Found in **CO4A\_HUMAN**, Complement C4-A OS=Homo sapiens GN=C4A PE=1 SV=2

Match to Query 20080: 1285.627528 from(643.821040,2+) rtinseconds(1386) index(28142)

Title: Locus:1.1.1.3145.17 File:"2013-07-02 CLN FXIII 180 min 3rd F 3.wiff"

Data file C:\Program Files (x86)\Matrix Science\Mascot Daemon\mgf9 FXIII 180 min 3rd\mascot\_daemon\_merge.mgf

Click mouse within plot area to zoom in by factor of two about that point

Or, Plot from  to  Da

Label all possible matches  Label matches used for scoring

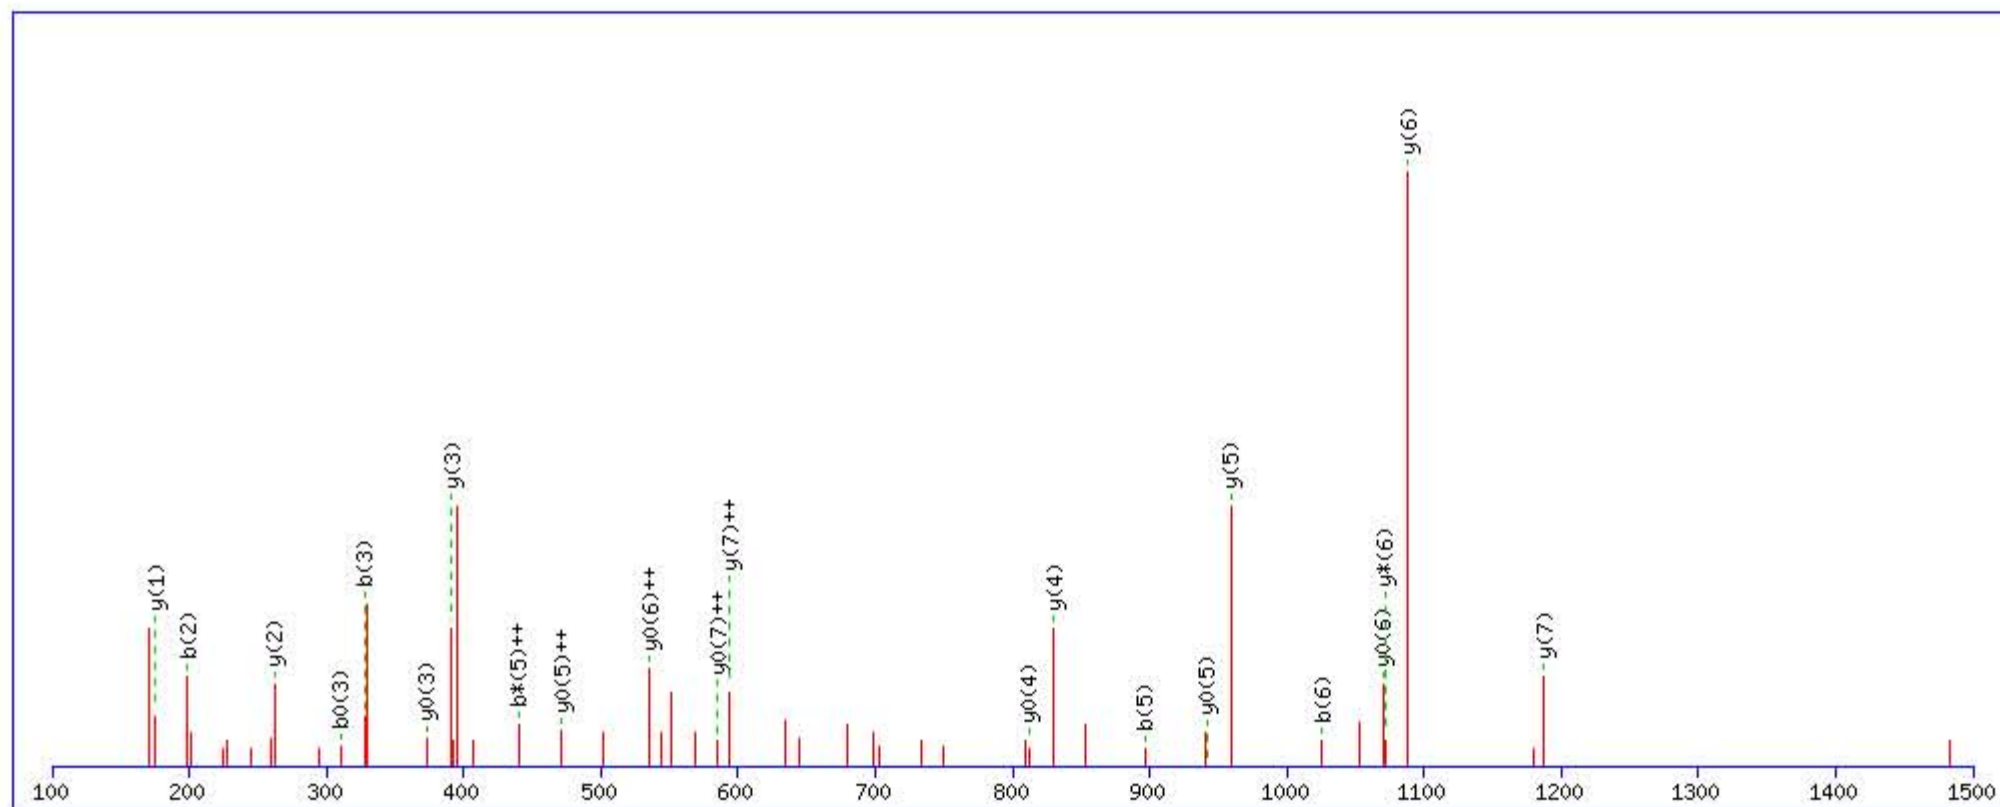

Monoisotopic mass of neutral peptide Mr(calc): 1285.633621

Fixed modifications: Carbamidomethyl (C) (apply to specified residues or termini only)

Variable modifications:

Q5 : Biotin:Thermo-21345 (Q)

Ions Score: 42 Expect: 0.0012

Matches : 22/70 fragment ions using 38 most intense peaks [\(help\)](#)

| # | b                  | b <sup>++</sup> | b <sup>+</sup> | b <sup>+++</sup>  | b <sup>0</sup>    | b <sup>0++</sup> | Seq. | y                  | y <sup>++</sup>   | y <sup>+</sup>     | y <sup>+++</sup> | y <sup>0</sup>     | y <sup>0++</sup>  | # |
|---|--------------------|-----------------|----------------|-------------------|-------------------|------------------|------|--------------------|-------------------|--------------------|------------------|--------------------|-------------------|---|
| 1 | 100.075690         | 50.541483       |                |                   |                   |                  | V    |                    |                   |                    |                  |                    |                   | 8 |
| 2 | <b>199.144104</b>  | 100.075690      |                |                   |                   |                  | V    | <b>1187.572499</b> | <b>594.289888</b> | 1170.545950        | 585.776613       | 1169.561934        | <b>585.284605</b> | 7 |
| 3 | <b>328.186697</b>  | 164.596987      |                |                   | <b>310.176132</b> | 155.591704       | E    | <b>1088.504085</b> | 544.755681        | <b>1071.477536</b> | 536.242406       | <b>1070.493520</b> | <b>535.750398</b> | 6 |
| 4 | 457.229290         | 229.118283      |                |                   | 439.218725        | 220.113001       | E    | <b>959.461492</b>  | 480.234384        | 942.434943         | 471.721110       | <b>941.450927</b>  | <b>471.229102</b> | 5 |
| 5 | <b>896.454616</b>  | 448.730946      | 879.428067     | <b>440.217672</b> | 878.444051        | 439.725664       | Q    | <b>830.418899</b>  | 415.713088        | 813.392350         | 407.199813       | <b>812.408334</b>  | 406.707805        | 4 |
| 6 | <b>1025.497209</b> | 513.252243      | 1008.470660    | 504.738968        | 1007.486644       | 504.246960       | E    | <b>391.193573</b>  | 196.100425        | 374.167024         | 187.587150       | <b>373.183008</b>  | 187.095142        | 3 |
| 7 | 1112.529237        | 556.768257      | 1095.502688    | 548.254982        | 1094.518672       | 547.762974       | S    | <b>262.150980</b>  | 131.579128        | 245.124431         | 123.065854       | 244.140415         | 122.573846        | 2 |
| 8 |                    |                 |                |                   |                   |                  | R    | <b>175.118952</b>  | 88.063114         | 158.092403         | 79.549839        |                    |                   | 1 |

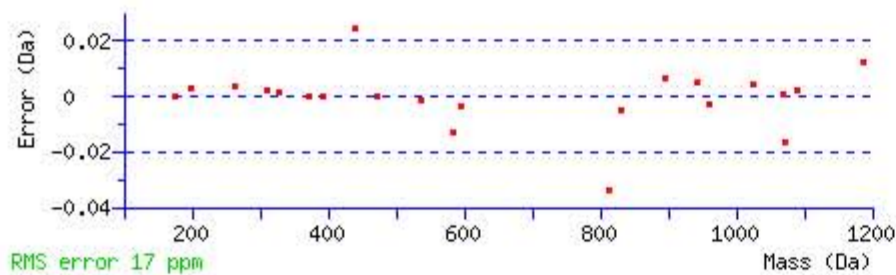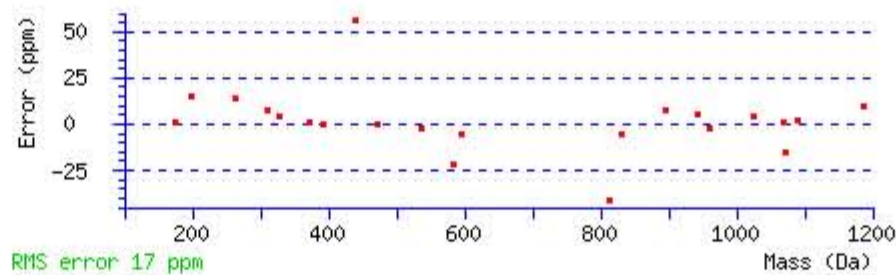

NCBI BLAST search of [VVEEQESR](#)

(Parameters: blastp, nr protein database, expect=20000, no filter, PAM30)

Other BLAST [web gateways](#)

All matches to this query

| Score | Mr(calc):   | Delta     | Sequence                 |
|-------|-------------|-----------|--------------------------|
| 42.0  | 1285.633621 | -0.006093 | <a href="#">VVEEQESR</a> |

Mascot: <http://www.matrixscience.com/>

# MASCOT SCIENCE Mascot Search Results

## Peptide View

MS/MS Fragmentation of **LGQYASPTAK**

Found in **CO4A\_HUMAN**, Complement C4-A OS=Homo sapiens GN=C4A PE=1 SV=2

Match to Query 21270: 1345.697228 from(673.855890,2+) rtinseconds(1635) index(29667)

Title: Locus:1.1.1.3232.22 File:"2013-07-02 CLN FXIII 180 min 3rd F 3.wiff"

Data file C:\Program Files (x86)\Matrix Science\Mascot Daemon\mgf\9 FXIII 180 min 3rd\mascot\_daemon\_merge.mgf

Click mouse within plot area to zoom in by factor of two about that point

Or, Plot from  to  Da

Label all possible matches  Label matches used for scoring

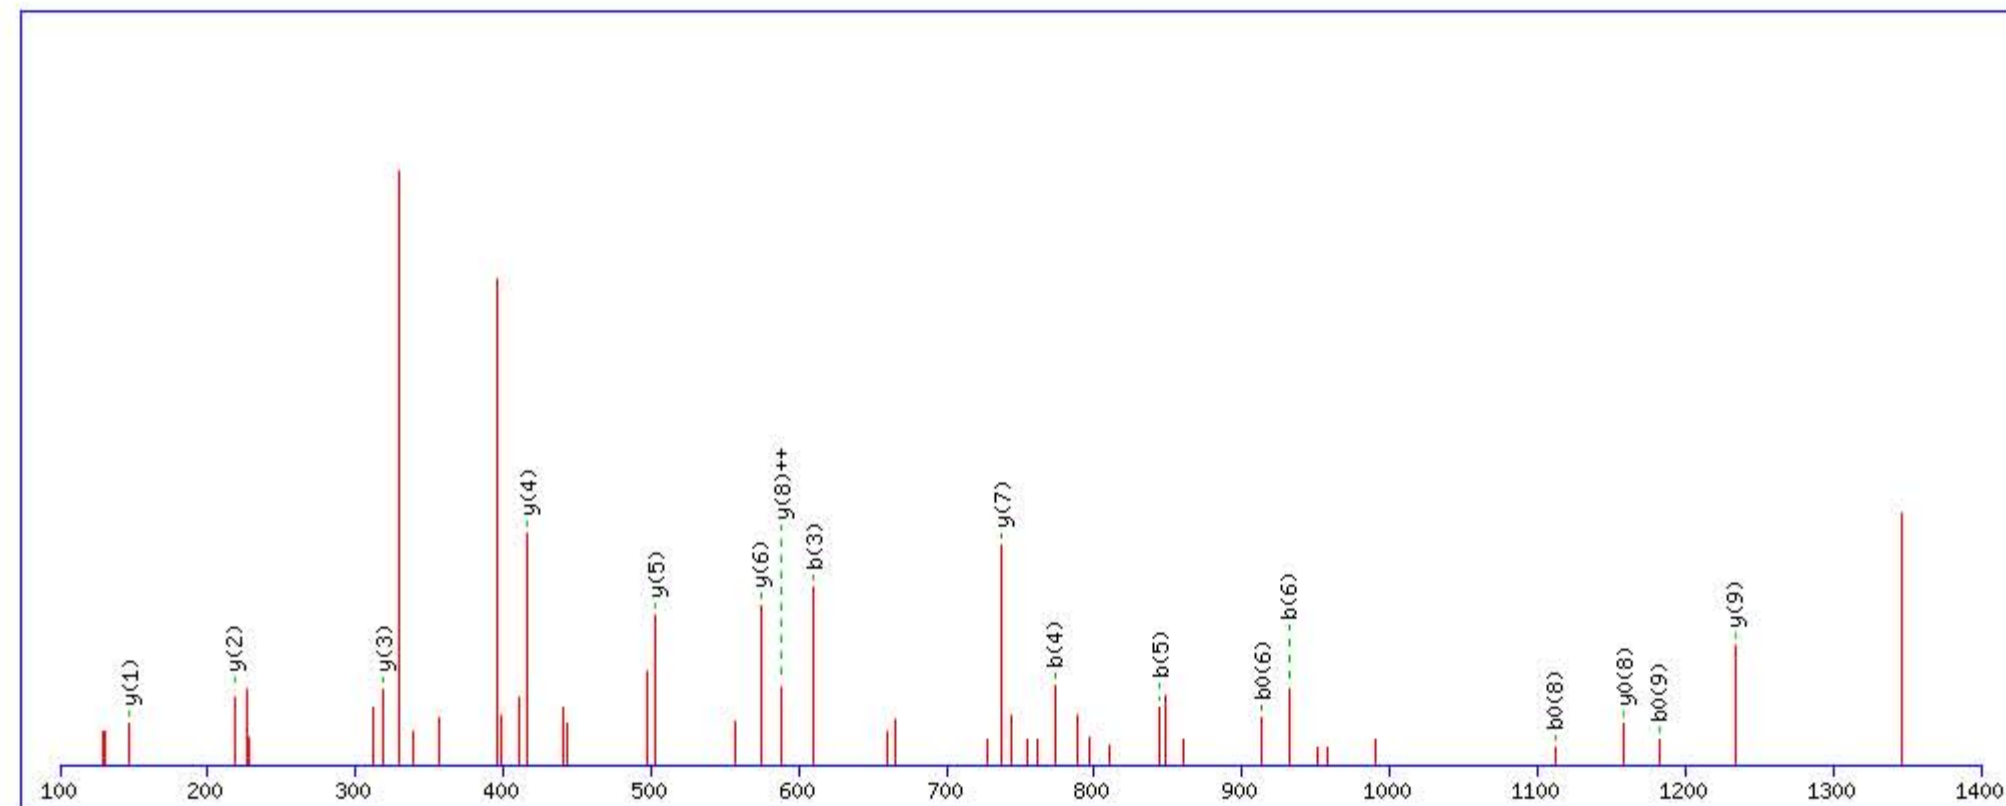

Monoisotopic mass of neutral peptide Mr(calc): 1345.706390

Fixed modifications: Carbamidomethyl (C) (apply to specified residues or termini only)

Variable modifications:

Q3 : Biotin:Thermo-21345 (Q)

Ions Score: 51 Expect: 8.5e-005

Matches : 17/90 fragment ions using 30 most intense peaks [\(help\)](#)

| #  | b                 | b <sup>++</sup> | b <sup>+</sup> | b <sup>+++</sup> | b <sup>0</sup>     | b <sup>0++</sup> | Seq. | y                  | y <sup>++</sup>   | y <sup>+</sup> | y <sup>+++</sup> | y <sup>0</sup>     | y <sup>0++</sup> | #  |
|----|-------------------|-----------------|----------------|------------------|--------------------|------------------|------|--------------------|-------------------|----------------|------------------|--------------------|------------------|----|
| 1  | 114.091340        | 57.549308       |                |                  |                    |                  | L    |                    |                   |                |                  |                    |                  | 10 |
| 2  | 171.112804        | 86.060040       |                |                  |                    |                  | G    | <b>1233.629622</b> | 617.318449        | 1216.603073    | 608.805175       | 1215.619057        | 608.313167       | 9  |
| 3  | <b>610.338130</b> | 305.672703      | 593.311581     | 297.159429       |                    |                  | Q    | 1176.608158        | <b>588.807717</b> | 1159.581609    | 580.294443       | <b>1158.597593</b> | 579.802435       | 8  |
| 4  | <b>773.401459</b> | 387.204368      | 756.374910     | 378.691093       |                    |                  | Y    | <b>737.382832</b>  | 369.195054        | 720.356283     | 360.681780       | 719.372267         | 360.189772       | 7  |
| 5  | <b>844.438573</b> | 422.722925      | 827.412024     | 414.209650       |                    |                  | A    | <b>574.319503</b>  | 287.663389        | 557.292954     | 279.150115       | 556.308938         | 278.658107       | 6  |
| 6  | <b>931.470601</b> | 466.238939      | 914.444052     | 457.725664       | <b>913.460036</b>  | 457.233656       | S    | <b>503.282389</b>  | 252.144832        | 486.255840     | 243.631558       | 485.271824         | 243.139550       | 5  |
| 7  | 1028.523365       | 514.765321      | 1011.496816    | 506.252046       | 1010.512800        | 505.760038       | P    | <b>416.250361</b>  | 208.628818        | 399.223812     | 200.115544       | 398.239796         | 199.623536       | 4  |
| 8  | 1129.571044       | 565.289160      | 1112.544495    | 556.775886       | <b>1111.560479</b> | 556.283878       | T    | <b>319.197597</b>  | 160.102436        | 302.171048     | 151.589162       | 301.187032         | 151.097154       | 3  |
| 9  | 1200.608158       | 600.807717      | 1183.581609    | 592.294443       | <b>1182.597593</b> | 591.802435       | A    | <b>218.149918</b>  | 109.578597        | 201.123369     | 101.065322       |                    |                  | 2  |
| 10 |                   |                 |                |                  |                    |                  | K    | <b>147.112804</b>  | 74.060040         | 130.086255     | 65.546765        |                    |                  | 1  |

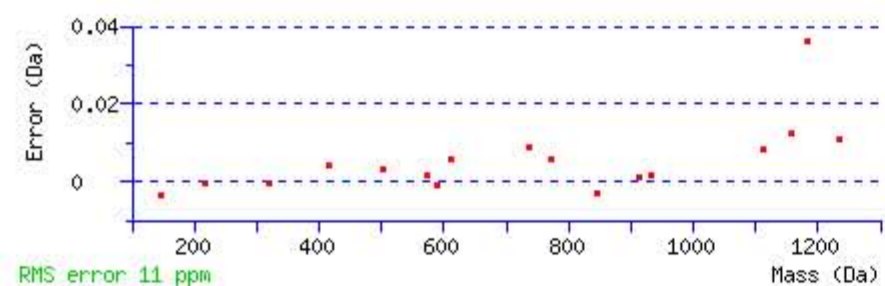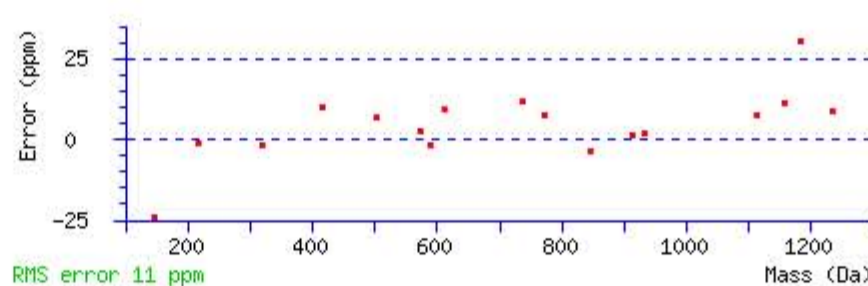

NCBI BLAST search of **LGQYASPTAK**

(Parameters: blastp, nr protein database, expect=20000, no filter, PAM30)

Other BLAST [web gateways](#)

## All matches to this query

| Score | Mr(calc):   | Delta     | Sequence                     |
|-------|-------------|-----------|------------------------------|
| 50.9  | 1345.706390 | -0.009162 | <a href="#">LGQYASPTAK</a>   |
| 7.1   | 1345.706406 | -0.009178 | <a href="#">QGLYTPQTK</a>    |
| 6.7   | 1345.706390 | -0.009162 | <a href="#">LGQYDQALK</a>    |
| 6.2   | 1345.692474 | 0.004754  | <a href="#">VASCRYPALGPR</a> |
| 2.6   | 1345.681213 | 0.016015  | <a href="#">ENKMTWAPKMK</a>  |
| 1.0   | 1345.692505 | 0.004723  | <a href="#">DHTVFGRVMLR</a>  |

Mascot: <http://www.matrixscience.com/>

# MASCOT SCIENCE Mascot Search Results

## Peptide View

MS/MS Fragmentation of **ITQVLHFTK**

Found in **CO4A\_HUMAN**, Complement C4-A OS=Homo sapiens GN=C4A PE=1 SV=2

Match to Query 23538: 1396.788582 from(466.603470,3+) rtinseconds(1965) index(45767)

Title: Locus:1.1.1.3397.3 File:"2013-07-02 CLN FXIII 180 min 3rd F 4.wiff"

Data file C:\Program Files (x86)\Matrix Science\Mascot Daemon\mgf\9 FXIII 180 min 3rd\mascot\_daemon\_merge.mgf

Click mouse within plot area to zoom in by factor of two about that point

Or, Plot from  to  Da

Label all possible matches  Label matches used for scoring

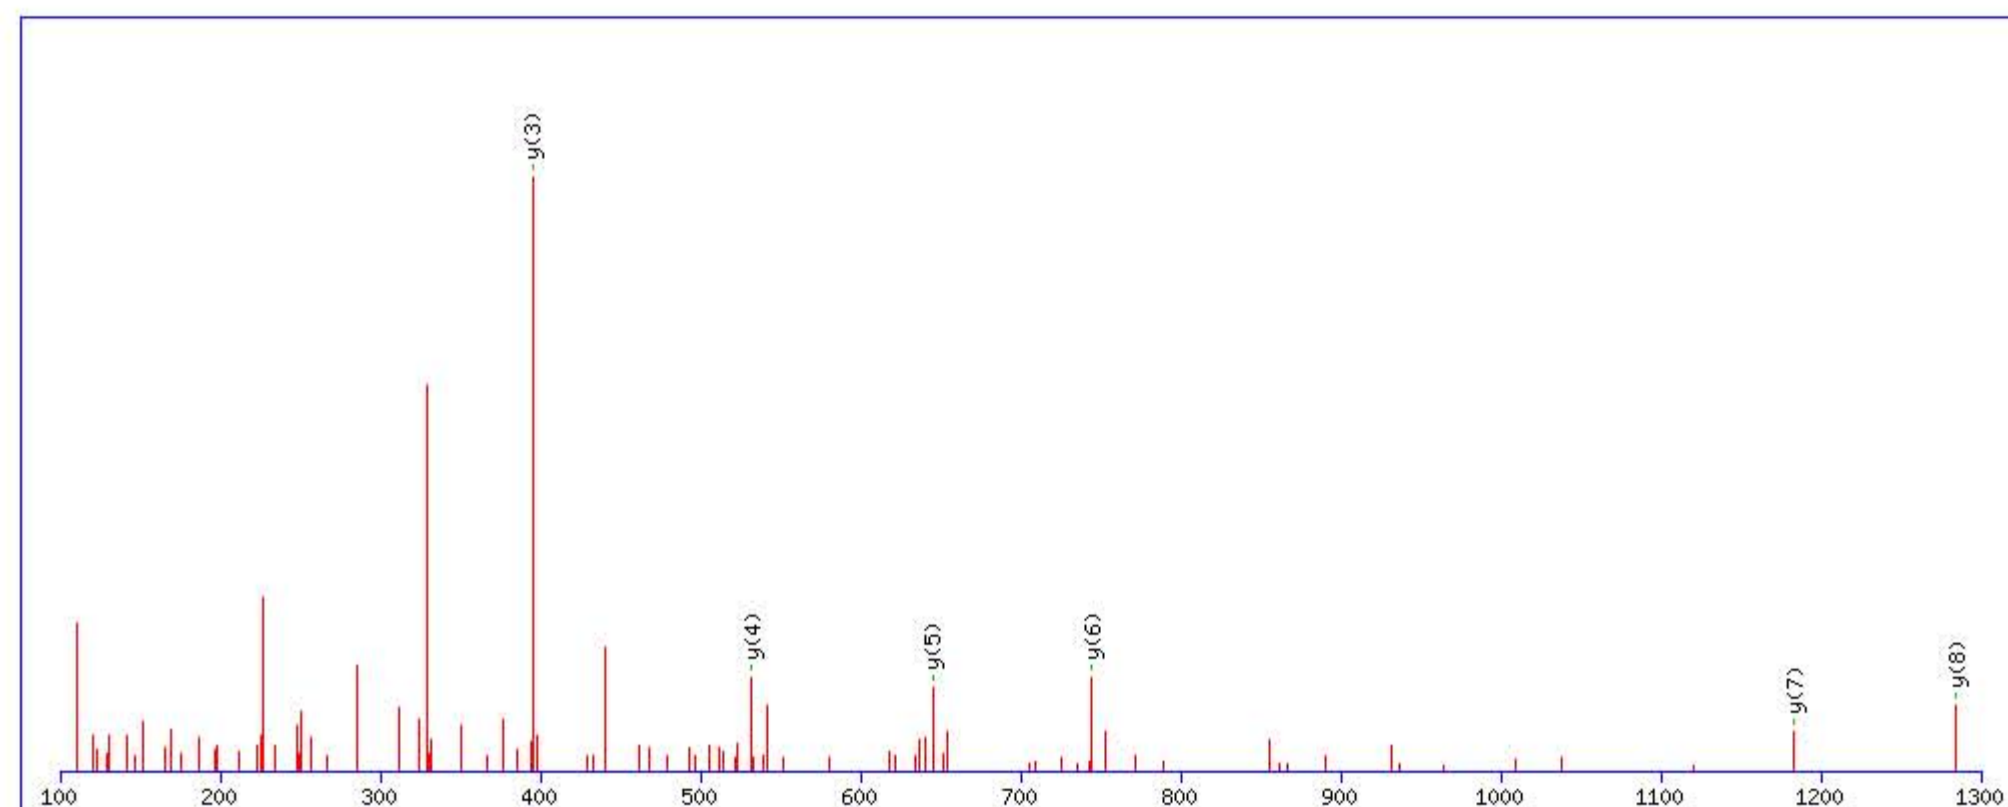

Monoisotopic mass of neutral peptide Mr(calc): 1396.790085

Fixed modifications: Carbamidomethyl (C) (apply to specified residues or termini only)

Variable modifications:

Q3 : Biotin:Thermo-21345 (Q)

Ions Score: 35 Expect: 0.00061

Matches : 6/88 fragment ions using 12 most intense peaks [\(help\)](#)

| # | b           | b <sup>++</sup> | b <sup>*</sup> | b <sup>+++</sup> | b <sup>0</sup> | b <sup>0++</sup> | Seq. | y           | y <sup>++</sup> | y <sup>*</sup> | y <sup>+++</sup> | y <sup>0</sup> | y <sup>0++</sup> | # |
|---|-------------|-----------------|----------------|------------------|----------------|------------------|------|-------------|-----------------|----------------|------------------|----------------|------------------|---|
| 1 | 114.091340  | 57.549308       |                |                  |                |                  | I    |             |                 |                |                  |                |                  | 9 |
| 2 | 215.139019  | 108.073147      |                |                  | 197.128454     | 99.067865        | T    | 1284.713292 | 642.860284      | 1267.686743    | 634.347010       | 1266.702727    | 633.855002       | 8 |
| 3 | 654.364345  | 327.685811      | 637.337796     | 319.172536       | 636.353780     | 318.680528       | Q    | 1183.665613 | 592.336445      | 1166.639064    | 583.823170       | 1165.655048    | 583.331162       | 7 |
| 4 | 753.432759  | 377.220018      | 736.406210     | 368.706743       | 735.422194     | 368.214735       | V    | 744.440287  | 372.723782      | 727.413738     | 364.210507       | 726.429722     | 363.718499       | 6 |
| 5 | 866.516823  | 433.762050      | 849.490274     | 425.248775       | 848.506258     | 424.756767       | L    | 645.371873  | 323.189575      | 628.345324     | 314.676300       | 627.361308     | 314.184292       | 5 |
| 6 | 1003.575735 | 502.291506      | 986.549186     | 493.778231       | 985.565170     | 493.286223       | H    | 532.287809  | 266.647543      | 515.261260     | 258.134268       | 514.277244     | 257.642260       | 4 |
| 7 | 1150.644149 | 575.825713      | 1133.617600    | 567.312438       | 1132.633584    | 566.820430       | F    | 395.228897  | 198.118086      | 378.202348     | 189.604812       | 377.218332     | 189.112804       | 3 |
| 8 | 1251.691828 | 626.349552      | 1234.665279    | 617.836278       | 1233.681263    | 617.344270       | T    | 248.160483  | 124.583879      | 231.133934     | 116.070605       | 230.149918     | 115.578597       | 2 |
| 9 |             |                 |                |                  |                |                  | K    | 147.112804  | 74.060040       | 130.086255     | 65.546765        |                |                  | 1 |

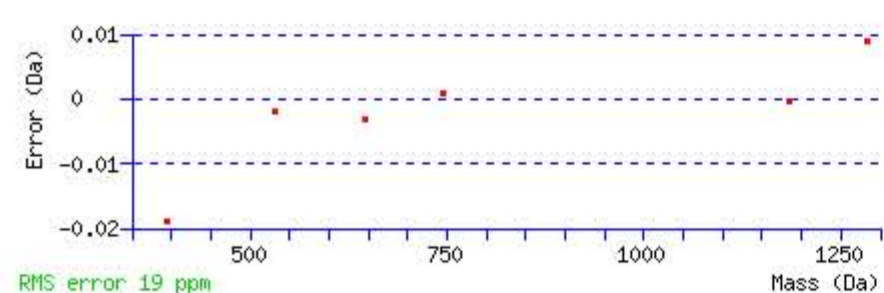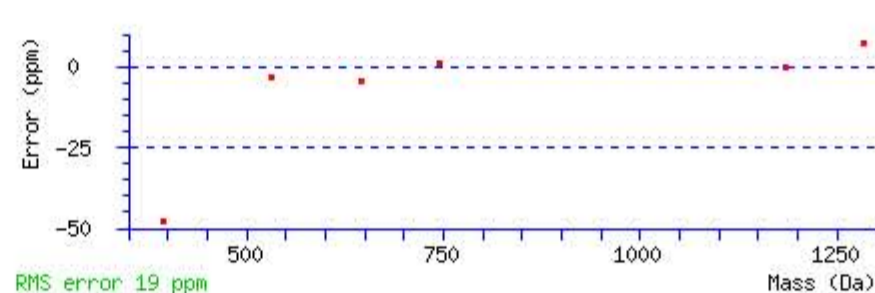

NCBI BLAST search of **ITQVLHFTK**

(Parameters: blastp, nr protein database, expect=20000, no filter, PAM30)

Other BLAST [web gateways](#)

All matches to this query

| Score | Mr(calc):   | Delta     | Sequence                     |
|-------|-------------|-----------|------------------------------|
| 34.6  | 1396.790085 | -0.001503 | <a href="#">ITQVLHFTK</a>    |
| 0.3   | 1396.792557 | -0.003975 | <a href="#">LLGELQEQIVQK</a> |

Mascot: <http://www.matrixscience.com/>

# MASCOT SEARCH RESULTS

## Peptide View

MS/MS Fragmentation of **GLEEELQFSLGSK**

Found in **CO4A\_HUMAN**, Complement C4-A OS=Homo sapiens GN=C4A PE=1 SV=2

Match to Query 34611: 1746.895648 from(874.455100,2+) rtinseconds(2556) index(49068)

Title: Locus:1.1.1.3602.7 File:"2013-07-02 CLN FXIII 180 min 3rd F 4.wiff"

Data file C:\Program Files (x86)\Matrix Science\Mascot Daemon\mgf9 FXIII 180 min 3rd\mascot\_daemon\_merge.mgf

Click mouse within plot area to zoom in by factor of two about that point

Or, Plot from  to  Da

Label all possible matches  Label matches used for scoring

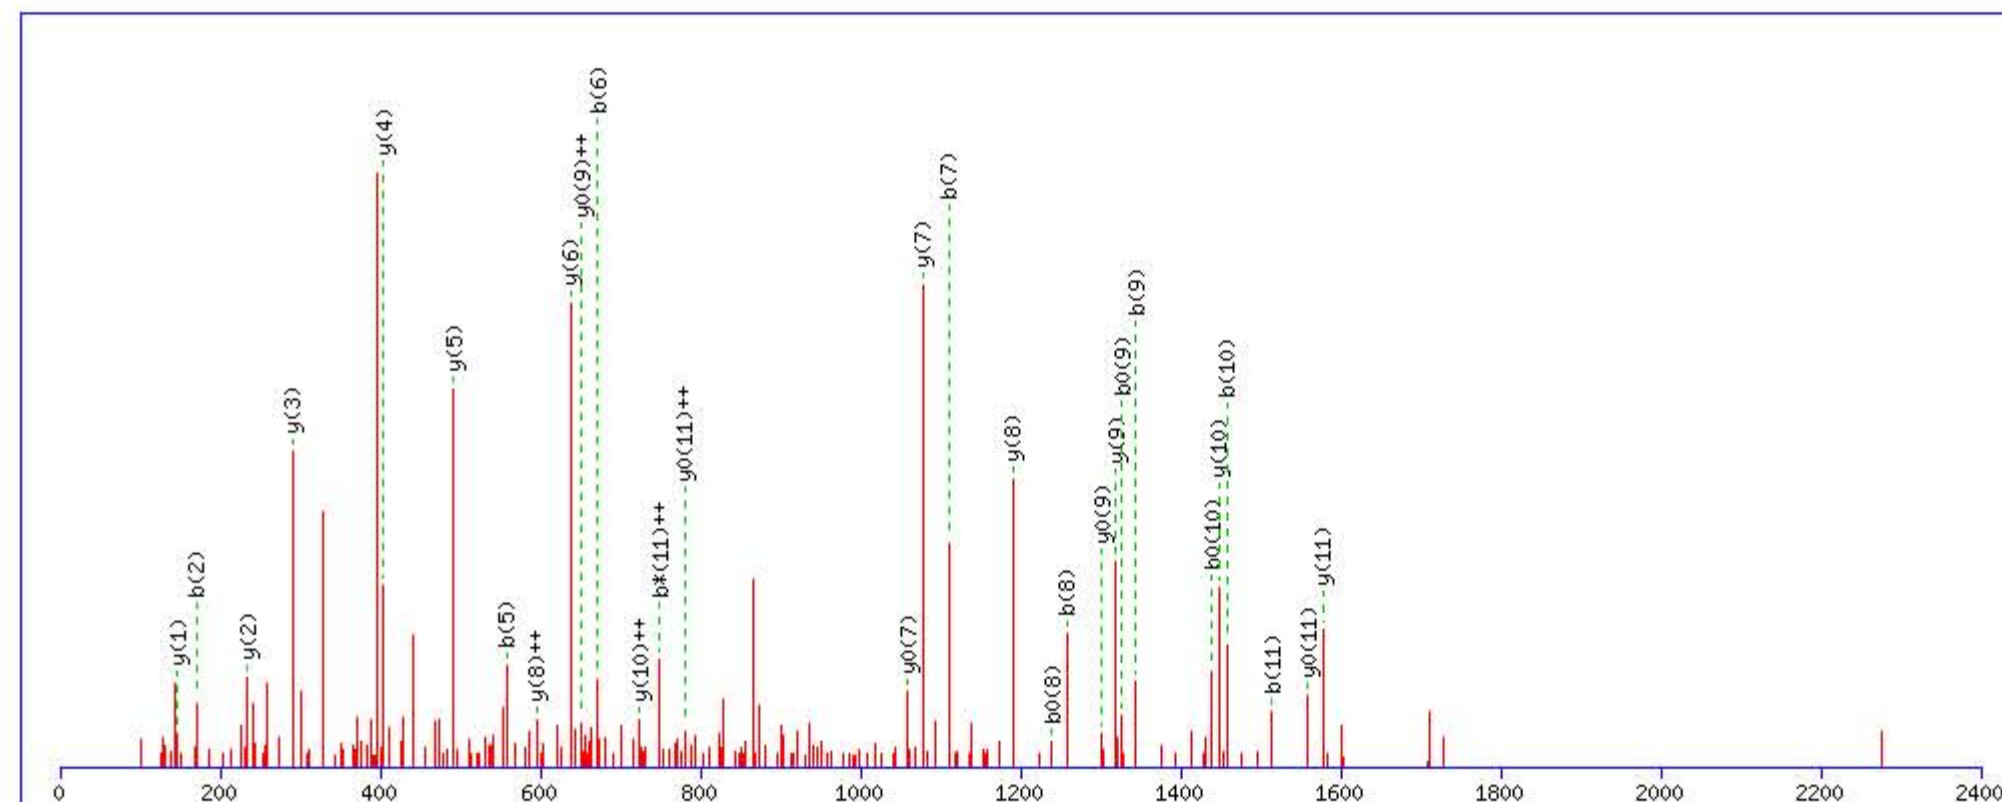

Monoisotopic mass of neutral peptide Mr(calc): 1746.886200

Fixed modifications: Carbamidomethyl (C) (apply to specified residues or termini only)

Variable modifications:

Q7 : Biotin:Thermo-21345 (Q)

Ions Score: 80 Expect: 6.9e-008

Matches : 30/126 fragment ions using 49 most intense peaks [\(help\)](#)

| #  | b                  | b <sup>++</sup> | b <sup>*</sup> | b <sup>*++</sup>  | b <sup>0</sup>     | b <sup>0++</sup> | Seq. | y                  | y <sup>++</sup>   | y <sup>*</sup> | y <sup>*++</sup> | y <sup>0</sup>     | y <sup>0++</sup>  | #  |
|----|--------------------|-----------------|----------------|-------------------|--------------------|------------------|------|--------------------|-------------------|----------------|------------------|--------------------|-------------------|----|
| 1  | 58.028740          | 29.518008       |                |                   |                    |                  | G    |                    |                   |                |                  |                    |                   | 13 |
| 2  | <b>171.112804</b>  | 86.060040       |                |                   |                    |                  | L    | 1690.872035        | 845.939656        | 1673.845486    | 837.426381       | 1672.861470        | 836.934373        | 12 |
| 3  | 300.155397         | 150.581336      |                |                   | 282.144832         | 141.576054       | E    | <b>1577.787971</b> | 789.397624        | 1560.761422    | 780.884349       | <b>1559.777406</b> | <b>780.392341</b> | 11 |
| 4  | 429.197990         | 215.102633      |                |                   | 411.187425         | 206.097351       | E    | <b>1448.745378</b> | <b>724.876327</b> | 1431.718829    | 716.363053       | 1430.734813        | 715.871045        | 10 |
| 5  | <b>558.240583</b>  | 279.623930      |                |                   | 540.230018         | 270.618647       | E    | <b>1319.702785</b> | 660.355031        | 1302.676236    | 651.841756       | <b>1301.692220</b> | <b>651.349748</b> | 9  |
| 6  | <b>671.324647</b>  | 336.165962      |                |                   | 653.314082         | 327.160679       | L    | <b>1190.660192</b> | <b>595.833734</b> | 1173.633643    | 587.320460       | 1172.649627        | 586.828452        | 8  |
| 7  | <b>1110.549973</b> | 555.778624      | 1093.523424    | 547.265350        | 1092.539408        | 546.773342       | Q    | <b>1077.576128</b> | 539.291702        | 1060.549579    | 530.778428       | <b>1059.565563</b> | 530.286419        | 7  |
| 8  | <b>1257.618387</b> | 629.312832      | 1240.591838    | 620.799557        | <b>1239.607822</b> | 620.307549       | F    | <b>638.350802</b>  | 319.679039        | 621.324253     | 311.165765       | 620.340237         | 310.673757        | 6  |
| 9  | <b>1344.650415</b> | 672.828846      | 1327.623866    | 664.315571        | <b>1326.639850</b> | 663.823563       | S    | <b>491.282388</b>  | 246.144832        | 474.255839     | 237.631557       | 473.271823         | 237.139549        | 5  |
| 10 | <b>1457.734479</b> | 729.370878      | 1440.707930    | 720.857603        | <b>1439.723914</b> | 720.365595       | L    | <b>404.250360</b>  | 202.628818        | 387.223811     | 194.115543       | 386.239795         | 193.623535        | 4  |
| 11 | <b>1514.755943</b> | 757.881609      | 1497.729394    | <b>749.368335</b> | 1496.745378        | 748.876327       | G    | <b>291.166296</b>  | 146.086786        | 274.139747     | 137.573512       | 273.155731         | 137.081504        | 3  |
| 12 | 1601.787971        | 801.397624      | 1584.761422    | 792.884349        | 1583.777406        | 792.392341       | S    | <b>234.144832</b>  | 117.576054        | 217.118283     | 109.062780       | 216.134267         | 108.570772        | 2  |
| 13 |                    |                 |                |                   |                    |                  | K    | <b>147.112804</b>  | 74.060040         | 130.086255     | 65.546765        |                    |                   | 1  |

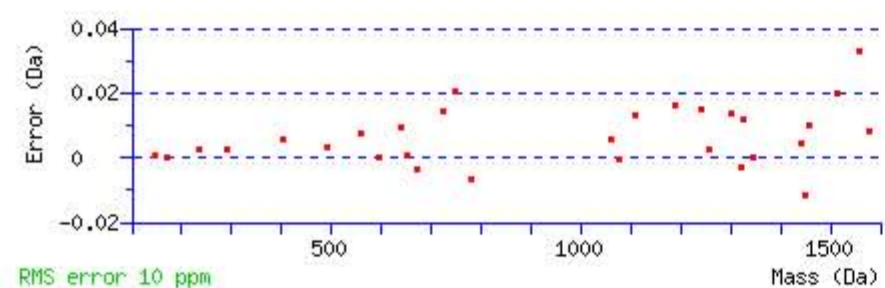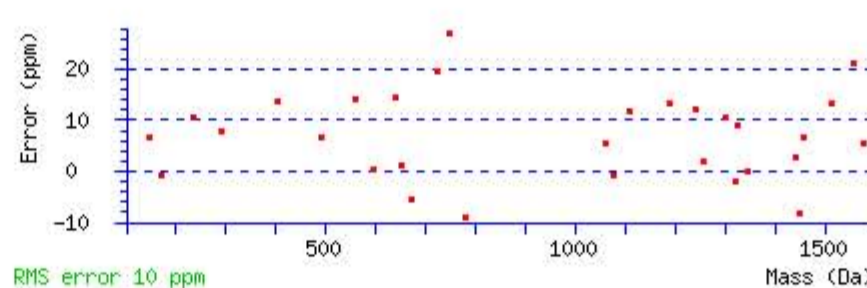

NCBI BLAST search of **GLEEELQFSLGSK**

(Parameters: blastp, nr protein database, expect=20000, no filter, PAM30)

Other BLAST [web gateways](#)

All matches to this query

| Score | Mr(calc):   | Delta    | Sequence                          |
|-------|-------------|----------|-----------------------------------|
| 79.6  | 1746.886200 | 0.009448 | <a href="#">GLEEELQFSLGSK</a>     |
| 3.2   | 1746.887558 | 0.008090 | <a href="#">AVQSKAFCAGGLAPGWK</a> |

Mascot: <http://www.matrixscience.com/>

# MASCOT Search Results

## Peptide View

MS/MS Fragmentation of **VLSLAQEQVGGSP**EK

Found in **CO4A\_HUMAN**, Complement C4-A OS=Homo sapiens GN=C4A PE=1 SV=2

Match to Query 36652: 1851.976662 from(618.332830,3+) rtinseconds(2001) index(46074)

Title: Locus:1.1.1.3409.10 File:"2013-07-02 CLN FXIII 180 min 3rd F 4.wiff"

Data file C:\Program Files (x86)\Matrix Science\Mascot Daemon\mgf9 FXIII 180 min 3rd\mascot\_daemon\_merge.mgf

Click mouse within plot area to zoom in by factor of two about that point

Or, Plot from  to  Da

Label all possible matches  Label matches used for scoring

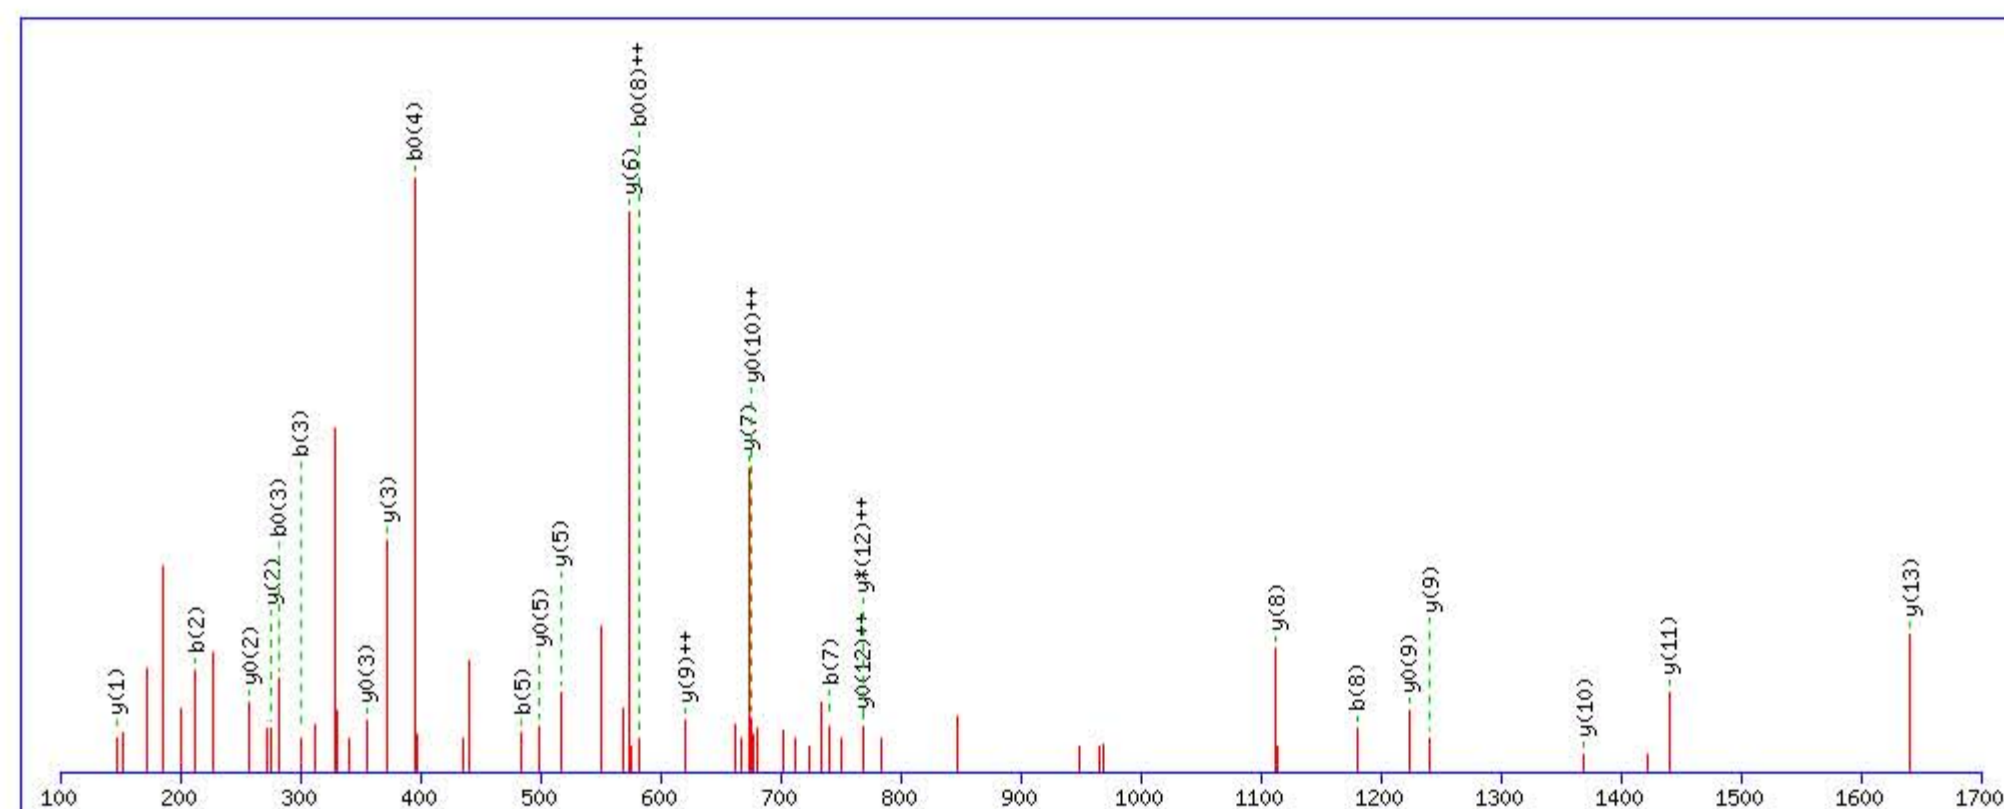

Monoisotopic mass of neutral peptide Mr(calc): 1851.976425

Fixed modifications: Carbamidomethyl (C) (apply to specified residues or termini only)

Variable modifications:

Q8 : Biotin:Thermo-21345 (Q)

Ions Score: 58 Expect: 3.7e-005

Matches : 27/152 fragment ions using 57 most intense peaks [\(help\)](#)

| #  | b                  | b <sup>++</sup> | b <sup>*</sup> | b <sup>*++</sup> | b <sup>0</sup>    | b <sup>0++</sup>  | Seq. | y                  | y <sup>++</sup>   | y <sup>*</sup> | y <sup>*++</sup>  | y <sup>0</sup>     | y <sup>0++</sup>  | #  |
|----|--------------------|-----------------|----------------|------------------|-------------------|-------------------|------|--------------------|-------------------|----------------|-------------------|--------------------|-------------------|----|
| 1  | 100.075690         | 50.541483       |                |                  |                   |                   | V    |                    |                   |                |                   |                    |                   | 15 |
| 2  | <b>213.159754</b>  | 107.083515      |                |                  |                   |                   | L    | 1753.915298        | 877.461287        | 1736.888749    | 868.948013        | 1735.904733        | 868.456004        | 14 |
| 3  | <b>300.191782</b>  | 150.599529      |                |                  | <b>282.181217</b> | 141.594247        | S    | <b>1640.831234</b> | 820.919255        | 1623.804685    | 812.405981        | 1622.820669        | 811.913973        | 13 |
| 4  | 413.275846         | 207.141561      |                |                  | <b>395.265281</b> | 198.136279        | L    | 1553.799206        | 777.403241        | 1536.772657    | <b>768.889967</b> | 1535.788641        | <b>768.397958</b> | 12 |
| 5  | <b>484.312960</b>  | 242.660118      |                |                  | 466.302395        | 233.654836        | A    | <b>1440.715142</b> | 720.861209        | 1423.688593    | 712.347935        | 1422.704577        | 711.855927        | 11 |
| 6  | 612.371538         | 306.689407      | 595.344989     | 298.176133       | 594.360973        | 297.684125        | Q    | <b>1369.678028</b> | 685.342652        | 1352.651479    | 676.829378        | 1351.667463        | <b>676.337370</b> | 10 |
| 7  | <b>741.414131</b>  | 371.210704      | 724.387582     | 362.697429       | 723.403566        | 362.205421        | E    | <b>1241.619450</b> | <b>621.313363</b> | 1224.592901    | 612.800089        | <b>1223.608885</b> | 612.308080        | 9  |
| 8  | <b>1180.639457</b> | 590.823367      | 1163.612908    | 582.310092       | 1162.628892       | <b>581.818084</b> | Q    | <b>1112.576857</b> | 556.792066        | 1095.550308    | 548.278792        | 1094.566292        | 547.786784        | 8  |
| 9  | 1279.707871        | 640.357574      | 1262.681322    | 631.844299       | 1261.697306       | 631.352291        | V    | <b>673.351531</b>  | 337.179404        | 656.324982     | 328.666129        | 655.340966         | 328.174121        | 7  |
| 10 | 1336.729335        | 668.868306      | 1319.702786    | 660.355031       | 1318.718770       | 659.863023        | G    | <b>574.283117</b>  | 287.645197        | 557.256568     | 279.131922        | 556.272552         | 278.639914        | 6  |
| 11 | 1393.750799        | 697.379037      | 1376.724250    | 688.865763       | 1375.740234       | 688.373755        | G    | <b>517.261653</b>  | 259.134465        | 500.235104     | 250.621190        | <b>499.251088</b>  | 250.129182        | 5  |
| 12 | 1480.782827        | 740.895052      | 1463.756278    | 732.381777       | 1462.772262       | 731.889769        | S    | 460.240189         | 230.623732        | 443.213640     | 222.110458        | 442.229624         | 221.618450        | 4  |
| 13 | 1577.835591        | 789.421434      | 1560.809042    | 780.908159       | 1559.825026       | 780.416151        | P    | <b>373.208161</b>  | 187.107718        | 356.181612     | 178.594444        | <b>355.197596</b>  | 178.102436        | 3  |
| 14 | 1706.878184        | 853.942730      | 1689.851635    | 845.429456       | 1688.867619       | 844.937447        | E    | <b>276.155397</b>  | 138.581336        | 259.128848     | 130.068062        | <b>258.144832</b>  | 129.576054        | 2  |
| 15 |                    |                 |                |                  |                   |                   | K    | <b>147.112804</b>  | 74.060040         | 130.086255     | 65.546765         |                    |                   | 1  |

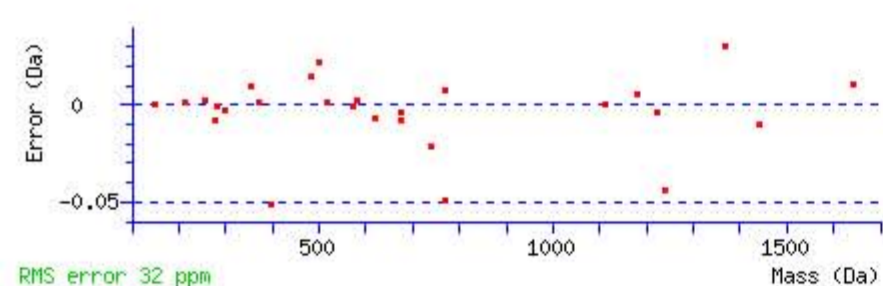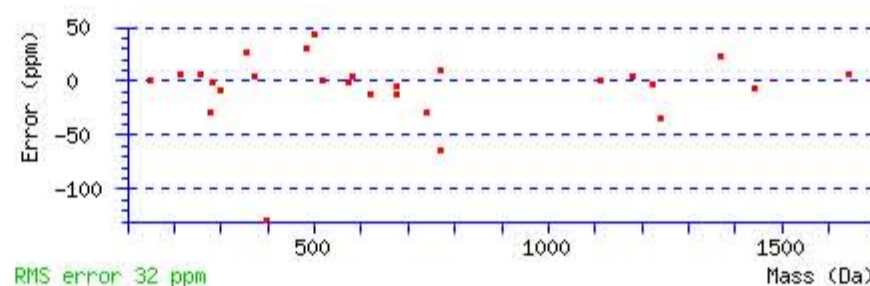

NCBI BLAST search of **VLSLAQEQVGGSP**EK

(Parameters: blastp, nr protein database, expect=20000, no filter, PAM30)

Other BLAST [web gateways](#)

All matches to this query

| Score | Mr(calc):   | Delta    | Sequence                         |
|-------|-------------|----------|----------------------------------|
| 58.3  | 1851.976425 | 0.000237 | <a href="#">VLSLAQEQVGGSP</a> EK |
| 37.0  | 1851.976425 | 0.000237 | <a href="#">VLSLAQEQVGGSP</a> EK |

Mascot: <http://www.matrixscience.com/>



# MASCOT SCIENCE Mascot Search Results

## Peptide View

MS/MS Fragmentation of **GPEVQLVAHSPWLK**

Found in **CO4A\_HUMAN**, Complement C4-A OS=Homo sapiens GN=C4A PE=1 SV=2

Match to Query 37065: 1871.013762 from(624.678530,3+) rtinseconds(2248) index(47552)

Title: Locus:1.1.1.3495.11 File:"2013-07-02 CLN FXIII 180 min 3rd F 4.wiff"

Data file C:\Program Files (x86)\Matrix Science\Mascot Daemon\mgf\9 FXIII 180 min 3rd\mascot\_daemon\_merge.mgf

Click mouse within plot area to zoom in by factor of two about that point

Or, Plot from  to  Da

Label all possible matches  Label matches used for scoring

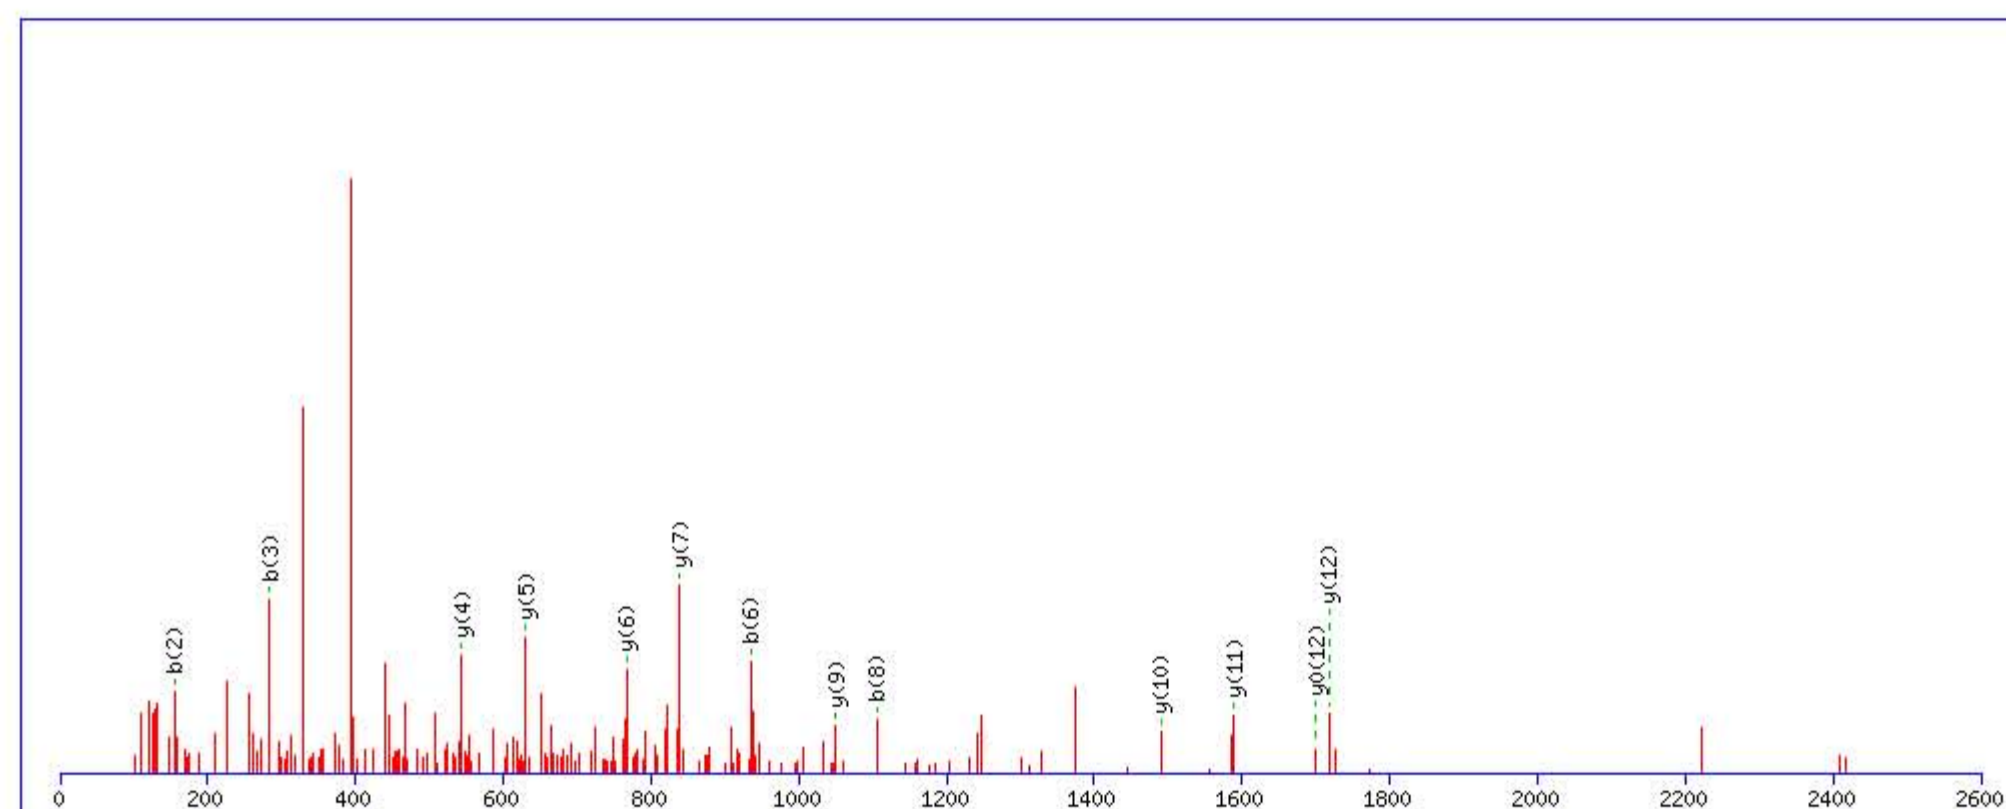

Monoisotopic mass of neutral peptide Mr(calc): 1871.012756

Fixed modifications: Carbamidomethyl (C) (apply to specified residues or termini only)

Variable modifications:

Q5 : Biotin:Thermo-21345 (Q)

Ions Score: 59 Expect: 7.5e-006

Matches : 13/136 fragment ions using 17 most intense peaks [\(help\)](#)

| #  | b                  | b <sup>++</sup> | b <sup>+</sup> | b <sup>+++</sup> | b <sup>0</sup> | b <sup>0++</sup> | Seq.     | y                  | y <sup>++</sup> | y <sup>+</sup> | y <sup>+++</sup> | y <sup>0</sup>     | y <sup>0++</sup> | #  |
|----|--------------------|-----------------|----------------|------------------|----------------|------------------|----------|--------------------|-----------------|----------------|------------------|--------------------|------------------|----|
| 1  | 58.028740          | 29.518008       |                |                  |                |                  | <b>G</b> |                    |                 |                |                  |                    |                  | 14 |
| 2  | <b>155.081504</b>  | 78.044390       |                |                  |                |                  | <b>P</b> | 1814.998574        | 908.002925      | 1797.972025    | 899.489651       | 1796.988009        | 898.997643       | 13 |
| 3  | <b>284.124097</b>  | 142.565687      |                |                  | 266.113532     | 133.560404       | <b>E</b> | <b>1717.945810</b> | 859.476543      | 1700.919261    | 850.963269       | <b>1699.935245</b> | 850.471261       | 12 |
| 4  | 383.192511         | 192.099894      |                |                  | 365.181946     | 183.094611       | <b>V</b> | <b>1588.903217</b> | 794.955247      | 1571.876668    | 786.441972       | 1570.892652        | 785.949964       | 11 |
| 5  | 822.417837         | 411.712557      | 805.391288     | 403.199282       | 804.407272     | 402.707274       | <b>Q</b> | <b>1489.834803</b> | 745.421040      | 1472.808254    | 736.907765       | 1471.824238        | 736.415757       | 10 |
| 6  | <b>935.501901</b>  | 468.254589      | 918.475352     | 459.741314       | 917.491336     | 459.249306       | <b>L</b> | <b>1050.609477</b> | 525.808377      | 1033.582928    | 517.295102       | 1032.598912        | 516.803094       | 9  |
| 7  | 1034.570315        | 517.788796      | 1017.543766    | 509.275521       | 1016.559750    | 508.783513       | <b>V</b> | 937.525413         | 469.266345      | 920.498864     | 460.753070       | 919.514848         | 460.261062       | 8  |
| 8  | <b>1105.607429</b> | 553.307353      | 1088.580880    | 544.794078       | 1087.596864    | 544.302070       | <b>A</b> | <b>838.456999</b>  | 419.732138      | 821.430450     | 411.218863       | 820.446434         | 410.726855       | 7  |
| 9  | 1242.666341        | 621.836809      | 1225.639792    | 613.323534       | 1224.655776    | 612.831526       | <b>H</b> | <b>767.419885</b>  | 384.213581      | 750.393336     | 375.700306       | 749.409320         | 375.208298       | 6  |
| 10 | 1329.698369        | 665.352823      | 1312.671820    | 656.839548       | 1311.687804    | 656.347540       | <b>S</b> | <b>630.360973</b>  | 315.684125      | 613.334424     | 307.170850       | 612.350408         | 306.678842       | 5  |
| 11 | 1426.751133        | 713.879205      | 1409.724584    | 705.365930       | 1408.740568    | 704.873922       | <b>P</b> | <b>543.328945</b>  | 272.168111      | 526.302396     | 263.654836       |                    |                  | 4  |
| 12 | 1612.830446        | 806.918861      | 1595.803897    | 798.405587       | 1594.819881    | 797.913579       | <b>W</b> | 446.276181         | 223.641728      | 429.249632     | 215.128454       |                    |                  | 3  |
| 13 | 1725.914510        | 863.460893      | 1708.887961    | 854.947619       | 1707.903945    | 854.455611       | <b>L</b> | 260.196868         | 130.602072      | 243.170319     | 122.088797       |                    |                  | 2  |
| 14 |                    |                 |                |                  |                |                  | <b>K</b> | 147.112804         | 74.060040       | 130.086255     | 65.546765        |                    |                  | 1  |

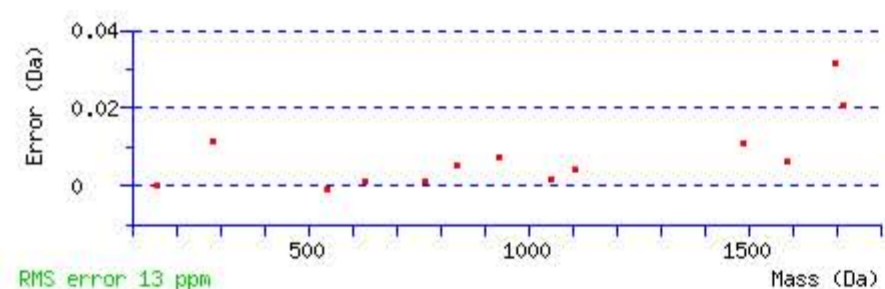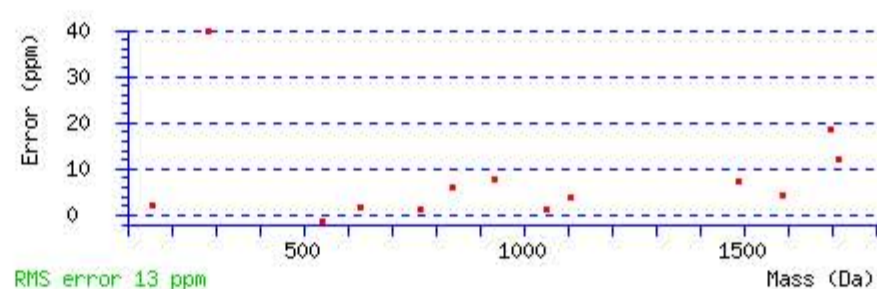

NCBI BLAST search of **GPEVQLVAHSPWLK**

(Parameters: blastp, nr protein database, expect=20000, no filter, PAM30)

Other BLAST [web gateways](#)

All matches to this query

| Score | Mr(calc):   | Delta    | Sequence                       |
|-------|-------------|----------|--------------------------------|
| 59.0  | 1871.012756 | 0.001006 | <a href="#">GPEVQLVAHSPWLK</a> |
| 4.4   | 1870.994781 | 0.018981 | <a href="#">NVNQAKLSEHRHK</a>  |

Mascot: <http://www.matrixscience.com/>

# **MASCOT** Mascot Search Results

## Peptide View

MS/MS Fragmentation of **HLVPGAPFLLQALVR**

Found in **CO4A\_HUMAN**, Complement C4-A OS=Homo sapiens GN=C4A PE=1 SV=2

Match to Query 38193: 1941.148422 from(648.056750,3+) rtinseconds(2881) index(51423)

Title: Locus:1.1.1.3713.8 File:"2013-07-02 CLN FXIII 180 min 3rd F 4.wiff"

Data file C:\Program Files (x86)\Matrix Science\Mascot Daemon\mgf9 FXIII 180 min 3rd\mascot\_daemon\_merge.mgf

Click mouse within plot area to zoom in by factor of two about that point

Or, Plot from  to  Da

Label all possible matches  Label matches used for scoring

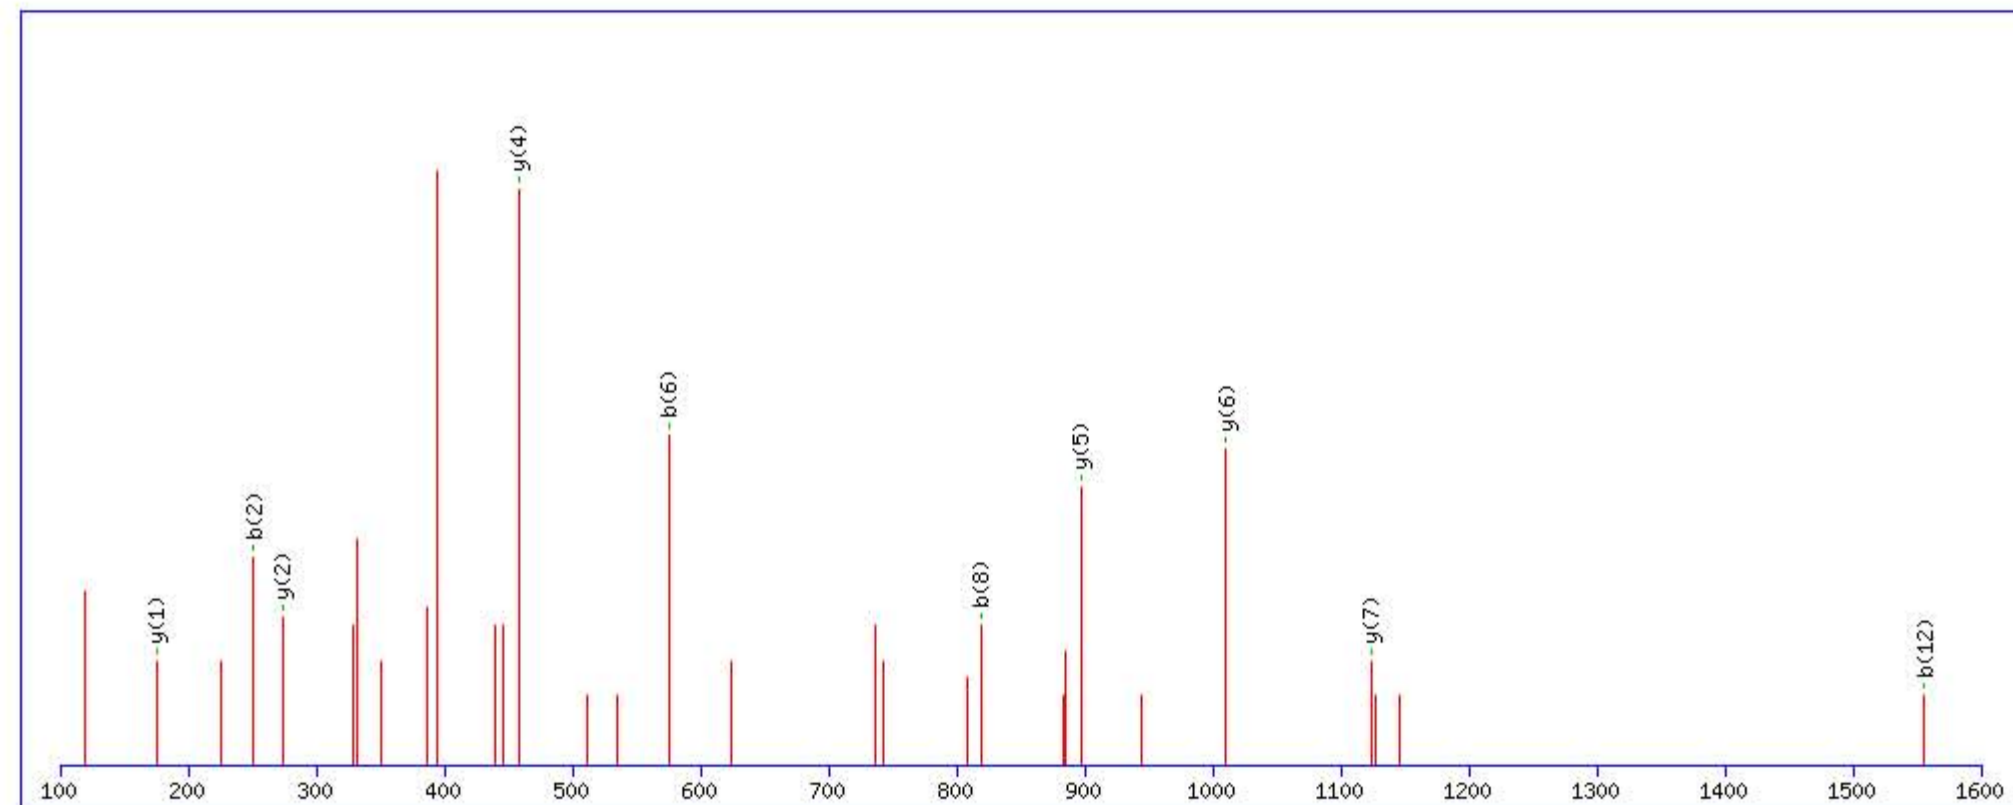

Monoisotopic mass of neutral peptide Mr(calc): 1941.138626

Fixed modifications: Carbamidomethyl (C) (apply to specified residues or termini only)

Variable modifications:

Q11 : Biotin:Thermo-21345 (Q)

Ions Score: 34 Expect: 0.00084

Matches : 10/92 fragment ions using 20 most intense peaks [\(help\)](#)

| #  | b                  | b <sup>++</sup> | b <sup>*</sup> | b <sup>*++</sup> | Seq.     | y                  | y <sup>++</sup> | y <sup>*</sup> | y <sup>*++</sup> | #  |
|----|--------------------|-----------------|----------------|------------------|----------|--------------------|-----------------|----------------|------------------|----|
| 1  | 138.066188         | 69.536732       |                |                  | <b>H</b> |                    |                 |                |                  | 15 |
| 2  | <b>251.150252</b>  | 126.078764      |                |                  | <b>L</b> | 1805.086996        | 903.047136      | 1788.060447    | 894.533862       | 14 |
| 3  | 350.218666         | 175.612971      |                |                  | <b>V</b> | 1692.002932        | 846.505104      | 1674.976383    | 837.991830       | 13 |
| 4  | 447.271430         | 224.139353      |                |                  | <b>P</b> | 1592.934518        | 796.970897      | 1575.907969    | 788.457623       | 12 |
| 5  | 504.292894         | 252.650085      |                |                  | <b>G</b> | 1495.881754        | 748.444515      | 1478.855205    | 739.931241       | 11 |
| 6  | <b>575.330008</b>  | 288.168642      |                |                  | <b>A</b> | 1438.860290        | 719.933783      | 1421.833741    | 711.420509       | 10 |
| 7  | 672.382772         | 336.695024      |                |                  | <b>P</b> | 1367.823176        | 684.415226      | 1350.796627    | 675.901952       | 9  |
| 8  | <b>819.451186</b>  | 410.229231      |                |                  | <b>F</b> | 1270.770412        | 635.888844      | 1253.743863    | 627.375570       | 8  |
| 9  | 932.535250         | 466.771263      |                |                  | <b>L</b> | <b>1123.701998</b> | 562.354637      | 1106.675449    | 553.841363       | 7  |
| 10 | 1045.619314        | 523.313295      |                |                  | <b>L</b> | <b>1010.617934</b> | 505.812605      | 993.591385     | 497.299331       | 6  |
| 11 | 1484.844640        | 742.925958      | 1467.818091    | 734.412684       | <b>Q</b> | <b>897.533870</b>  | 449.270573      | 880.507321     | 440.757298       | 5  |
| 12 | <b>1555.881754</b> | 778.444515      | 1538.855205    | 769.931241       | <b>A</b> | <b>458.308544</b>  | 229.657910      | 441.281995     | 221.144635       | 4  |
| 13 | 1668.965818        | 834.986547      | 1651.939269    | 826.473273       | <b>L</b> | 387.271430         | 194.139353      | 370.244881     | 185.626078       | 3  |
| 14 | 1768.034232        | 884.520754      | 1751.007683    | 876.007480       | <b>V</b> | <b>274.187366</b>  | 137.597321      | 257.160817     | 129.084047       | 2  |
| 15 |                    |                 |                |                  | <b>R</b> | <b>175.118952</b>  | 88.063114       | 158.092403     | 79.549839        | 1  |

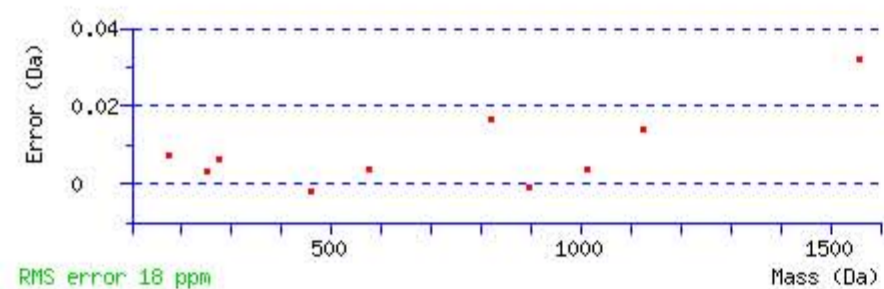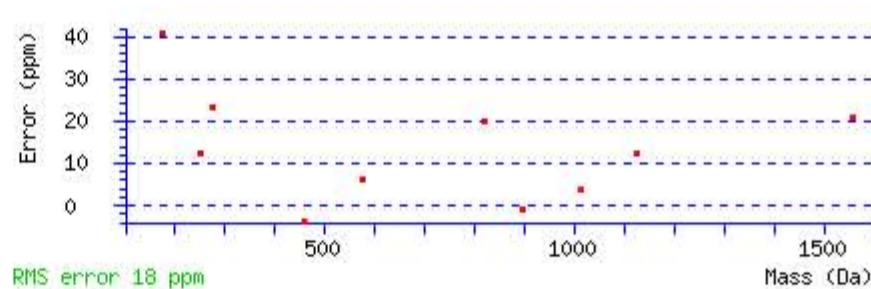

NCBI BLAST search of [HLVPGAPFLLQALVR](#)

(Parameters: blastp, nr protein database, expect=20000, no filter, PAM30)

Other BLAST [web gateways](#)

All matches to this query

| Score | Mr(calc):   | Delta    | Sequence                        |
|-------|-------------|----------|---------------------------------|
| 34.0  | 1941.138626 | 0.009796 | <a href="#">HLVPGAPFLLQALVR</a> |

Mascot: <http://www.matrixscience.com/>

# MASCOT Search Results

## Peptide View

MS/MS Fragmentation of **EPFLSCCQFAESLR**

Found in **CO4A\_HUMAN**, Complement C4-A OS=Homo sapiens GN=C4A PE=1 SV=2

Match to Query 40920: 2053.946352 from(685.656060,3+) rtinseconds(2498) index(48782)

Title: Locus:1.1.1.3582.13 File:"2013-07-02 CLN FXIII 180 min 3rd F 4.wiff"

Data file C:\Program Files (x86)\Matrix Science\Mascot Daemon\mgf\9 FXIII 180 min 3rd\mascot\_daemon\_merge.mgf

Click mouse within plot area to zoom in by factor of two about that point

Or, Plot from  to  Da

Label all possible matches  Label matches used for scoring

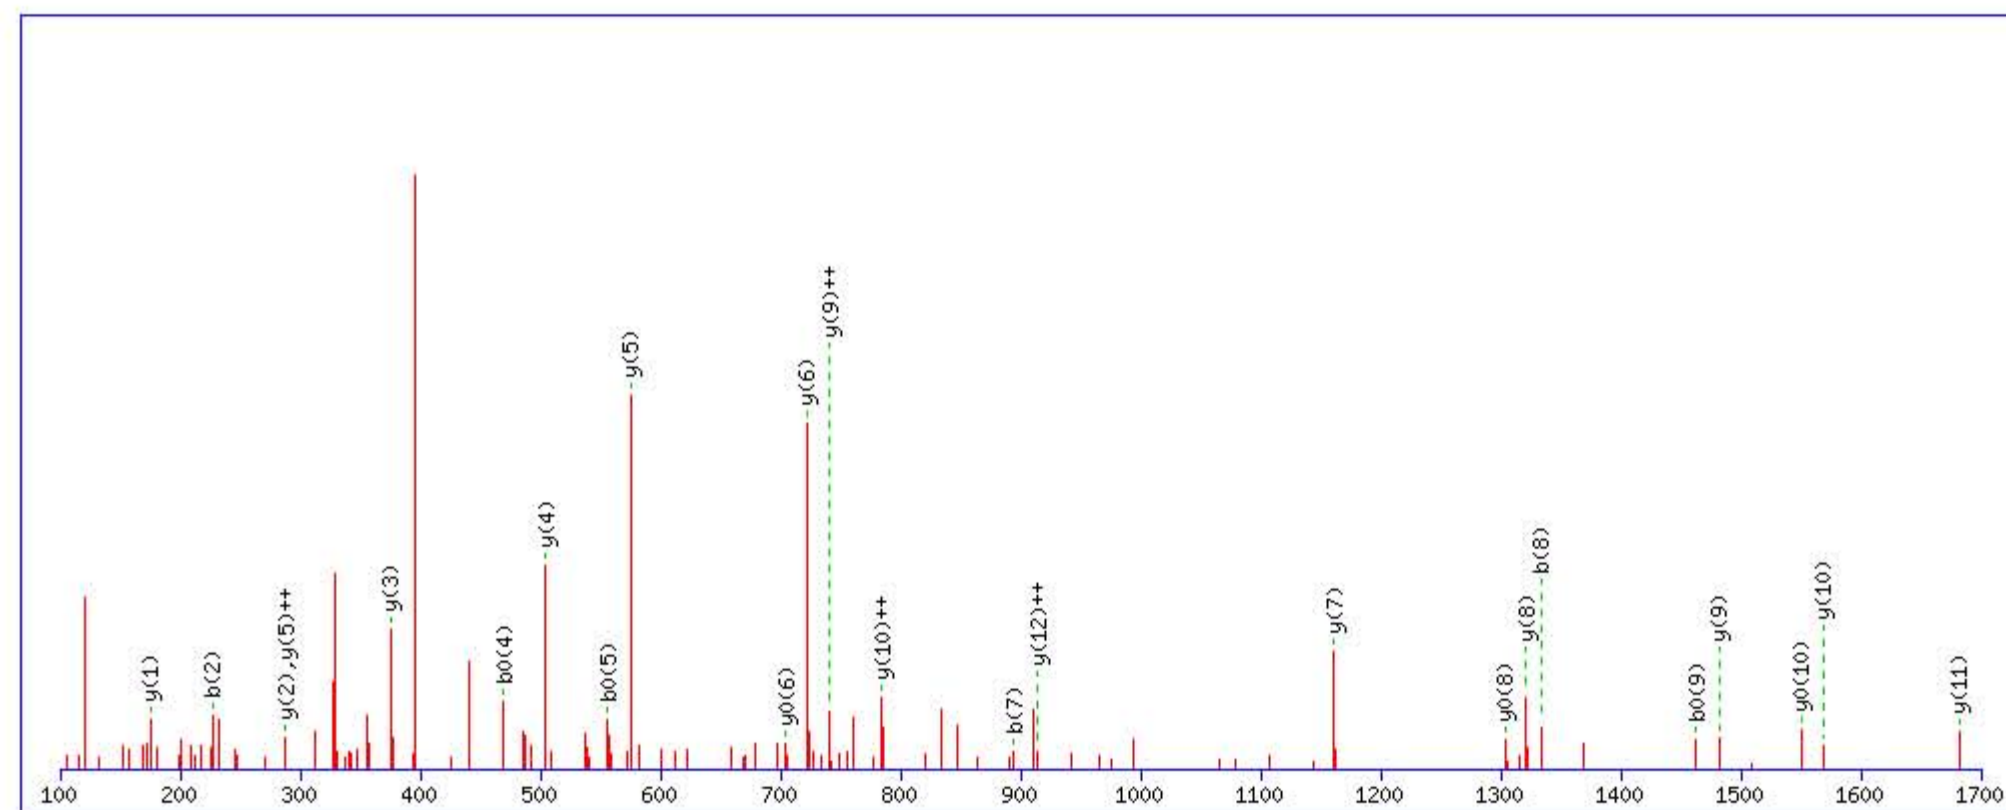

Monoisotopic mass of neutral peptide Mr(calc): 2053.942368

Fixed modifications: Carbamidomethyl (C) (apply to specified residues or termini only)

Variable modifications:

Q8 : Biotin:Thermo-21345 (Q)

Ions Score: 65 Expect: 1.4e-006

Matches : 24/138 fragment ions using 42 most intense peaks [\(help\)](#)

| #  | b                  | b <sup>++</sup> | b <sup>+</sup> | b <sup>+++</sup> | b <sup>0</sup>     | b <sup>0++</sup> | Seq. | y                  | y <sup>++</sup>   | y <sup>+</sup> | y <sup>+++</sup> | y <sup>0</sup>     | y <sup>0++</sup> | #  |
|----|--------------------|-----------------|----------------|------------------|--------------------|------------------|------|--------------------|-------------------|----------------|------------------|--------------------|------------------|----|
| 1  | 130.049869         | 65.528572       |                |                  | 112.039304         | 56.523290        | E    |                    |                   |                |                  |                    |                  | 14 |
| 2  | <b>227.102633</b>  | 114.054954      |                |                  | 209.092068         | 105.049672       | P    | 1925.907059        | 963.457168        | 1908.880510    | 954.943893       | 1907.896494        | 954.451885       | 13 |
| 3  | 374.171047         | 187.589161      |                |                  | 356.160482         | 178.583879       | F    | 1828.854295        | <b>914.930786</b> | 1811.827746    | 906.417511       | 1810.843730        | 905.925503       | 12 |
| 4  | 487.255111         | 244.131193      |                |                  | <b>469.244546</b>  | 235.125911       | L    | <b>1681.785881</b> | 841.396579        | 1664.759332    | 832.883304       | 1663.775316        | 832.391296       | 11 |
| 5  | 574.287139         | 287.647208      |                |                  | <b>556.276574</b>  | 278.641925       | S    | <b>1568.701817</b> | <b>784.854547</b> | 1551.675268    | 776.341272       | <b>1550.691252</b> | 775.849264       | 10 |
| 6  | 734.317788         | 367.662532      |                |                  | 716.307223         | 358.657250       | C    | <b>1481.669789</b> | <b>741.338533</b> | 1464.643240    | 732.825258       | 1463.659224        | 732.333250       | 9  |
| 7  | <b>894.348437</b>  | 447.677857      |                |                  | 876.337872         | 438.672574       | C    | <b>1321.639140</b> | 661.323208        | 1304.612591    | 652.809934       | <b>1303.628575</b> | 652.317926       | 8  |
| 8  | <b>1333.573763</b> | 667.290520      | 1316.547214    | 658.777245       | 1315.563198        | 658.285237       | Q    | <b>1161.608491</b> | 581.307884        | 1144.581942    | 572.794609       | 1143.597926        | 572.302601       | 7  |
| 9  | 1480.642177        | 740.824727      | 1463.615628    | 732.311452       | <b>1462.631612</b> | 731.819444       | F    | <b>722.383165</b>  | 361.695221        | 705.356616     | 353.181946       | <b>704.372600</b>  | 352.689938       | 6  |
| 10 | 1551.679291        | 776.343284      | 1534.652742    | 767.830009       | 1533.668726        | 767.338001       | A    | <b>575.314751</b>  | <b>288.161014</b> | 558.288202     | 279.647739       | 557.304186         | 279.155731       | 5  |
| 11 | 1680.721884        | 840.864580      | 1663.695335    | 832.351306       | 1662.711319        | 831.859298       | E    | <b>504.277637</b>  | 252.642457        | 487.251088     | 244.129182       | 486.267072         | 243.637174       | 4  |
| 12 | 1767.753912        | 884.380594      | 1750.727363    | 875.867320       | 1749.743347        | 875.375312       | S    | <b>375.235044</b>  | 188.121160        | 358.208495     | 179.607885       | 357.224479         | 179.115877       | 3  |
| 13 | 1880.837976        | 940.922626      | 1863.811427    | 932.409352       | 1862.827411        | 931.917344       | L    | <b>288.203016</b>  | 144.605146        | 271.176467     | 136.091871       |                    |                  | 2  |
| 14 |                    |                 |                |                  |                    |                  | R    | <b>175.118952</b>  | 88.063114         | 158.092403     | 79.549839        |                    |                  | 1  |

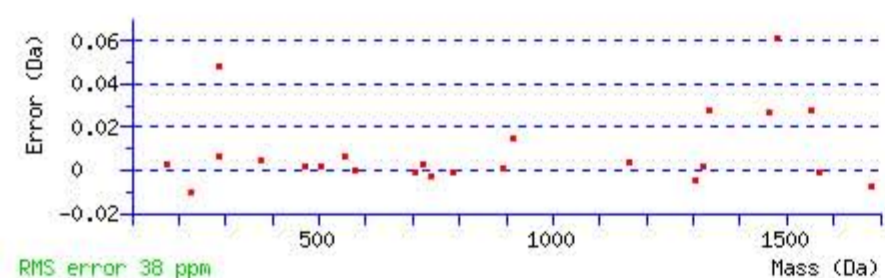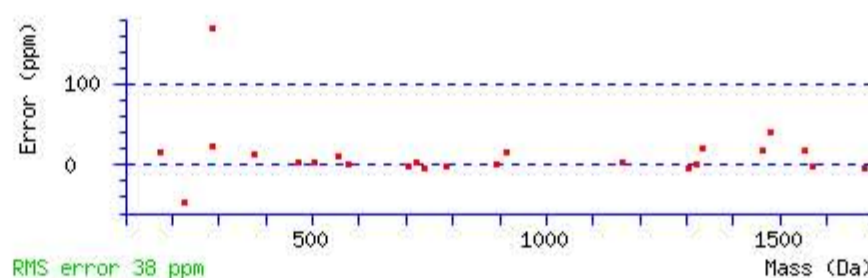

NCBI BLAST search of **EPFLSCCQFAESLR**

(Parameters: blastp, nr protein database, expect=20000, no filter, PAM30)

Other BLAST [web gateways](#)

All matches to this query

| Score | Mr(calc):   | Delta     | Sequence                           |
|-------|-------------|-----------|------------------------------------|
| 65.3  | 2053.942368 | 0.003984  | <a href="#">EPFLSCCQFAESLR</a>     |
| 3.1   | 2053.948227 | -0.001875 | <a href="#">EKSTCSMGSELLPMISPR</a> |

Mascot: <http://www.matrixscience.com/>

# MASCOT Search Results

## Peptide View

MS/MS Fragmentation of **LLATLCSAEVCQCAEGK**

Found in **CO4A\_HUMAN**, Complement C4-A OS=Homo sapiens GN=C4A PE=1 SV=2

Match to Query 43621: 2220.038922 from(741.020250,3+) rtinseconds(2229) index(47386)

Title: Locus:1.1.1.3488.20 File:"2013-07-02 CLN FXIII 180 min 3rd F 4.wiff"

Data file C:\Program Files (x86)\Matrix Science\Mascot Daemon\mgf9 FXIII 180 min 3rd\mascot\_daemon\_merge.mgf

Click mouse within plot area to zoom in by factor of two about that point

Or, Plot from  to  Da

Label all possible matches  Label matches used for scoring

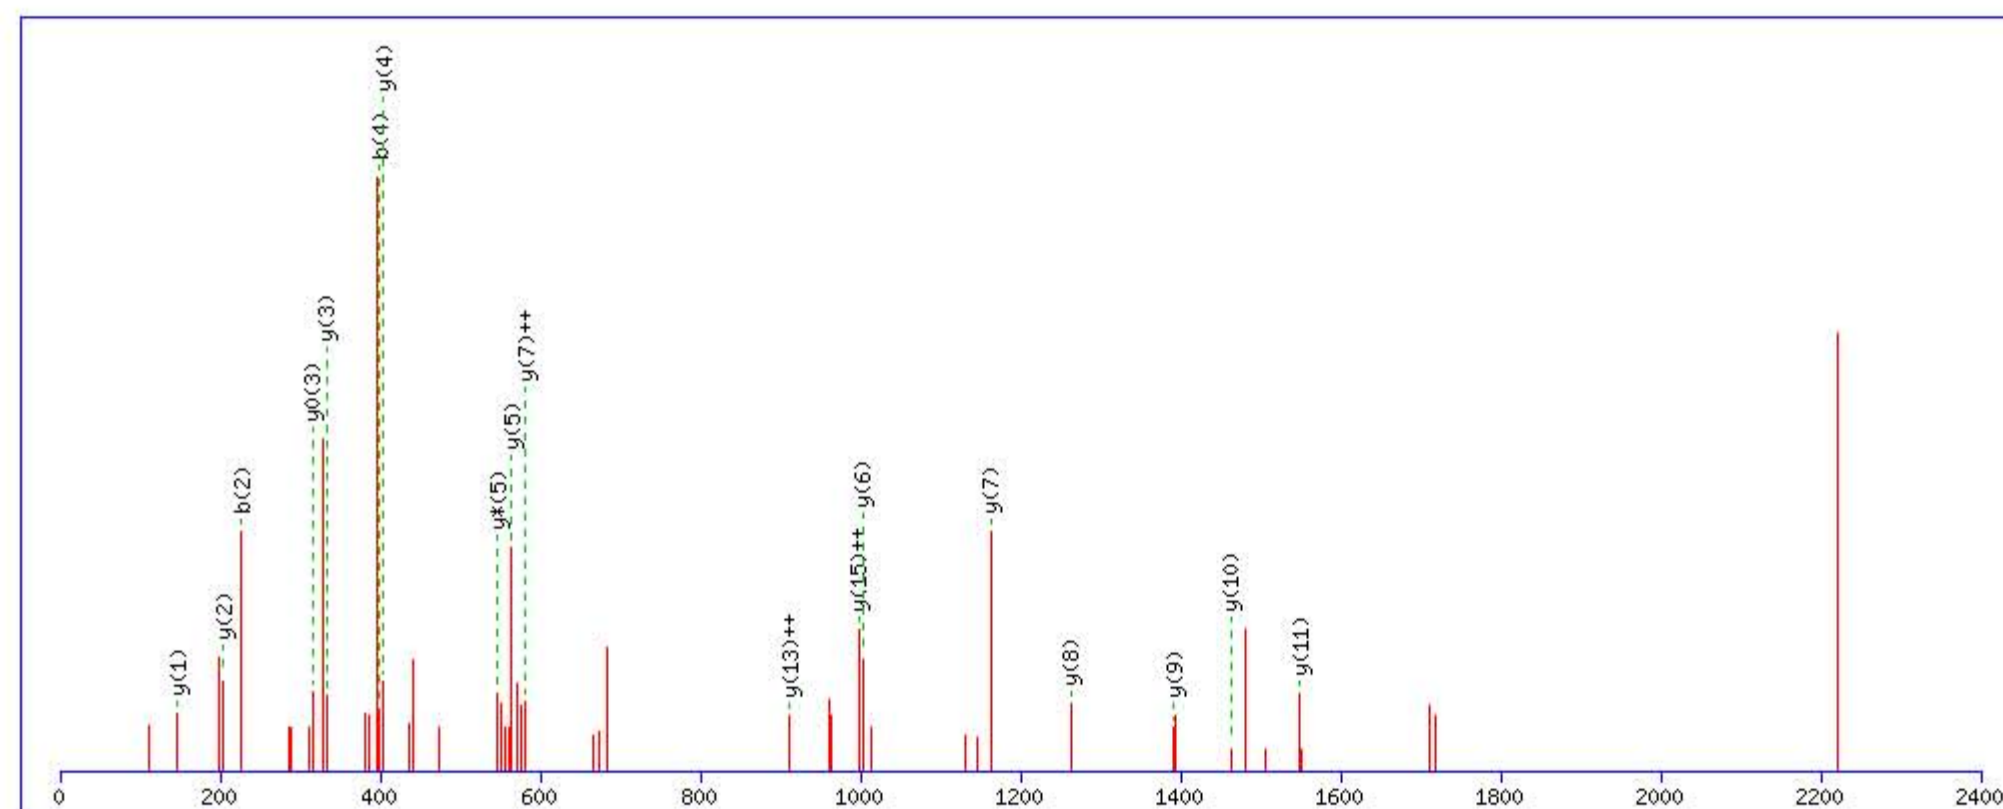

Monoisotopic mass of neutral peptide Mr(calc): 2220.041092

Fixed modifications: Carbamidomethyl (C) (apply to specified residues or termini only)

Variable modifications:

Q12 : Biotin:Thermo-21345 (Q)

Ions Score: 50 Expect: 0.00017

Matches : 18/160 fragment ions using 45 most intense peaks [\(help\)](#)

| #  | b                 | b <sup>++</sup> | b <sup>*</sup> | b <sup>*++</sup> | b <sup>0</sup> | b <sup>0++</sup> | Seq. | y                  | y <sup>++</sup>   | y <sup>*</sup>    | y <sup>*++</sup> | y <sup>0</sup>    | y <sup>0++</sup> | #  |
|----|-------------------|-----------------|----------------|------------------|----------------|------------------|------|--------------------|-------------------|-------------------|------------------|-------------------|------------------|----|
| 1  | 114.091340        | 57.549308       |                |                  |                |                  | L    |                    |                   |                   |                  |                   |                  | 17 |
| 2  | <b>227.175404</b> | 114.091340      |                |                  |                |                  | L    | 2107.964318        | 1054.485797       | 2090.937769       | 1045.972522      | 2089.953753       | 1045.480514      | 16 |
| 3  | 298.212518        | 149.609897      |                |                  |                |                  | A    | 1994.880254        | <b>997.943765</b> | 1977.853705       | 989.430491       | 1976.869689       | 988.938483       | 15 |
| 4  | <b>399.260197</b> | 200.133737      |                |                  | 381.249632     | 191.128454       | T    | 1923.843140        | 962.425208        | 1906.816591       | 953.911934       | 1905.832575       | 953.419926       | 14 |
| 5  | 512.344261        | 256.675769      |                |                  | 494.333696     | 247.670486       | L    | 1822.795461        | <b>911.901369</b> | 1805.768912       | 903.388094       | 1804.784896       | 902.896086       | 13 |
| 6  | 672.374910        | 336.691093      |                |                  | 654.364345     | 327.685811       | C    | 1709.711397        | 855.359337        | 1692.684848       | 846.846062       | 1691.700832       | 846.354054       | 12 |
| 7  | 759.406938        | 380.207107      |                |                  | 741.396373     | 371.201825       | S    | <b>1549.680748</b> | 775.344012        | 1532.654199       | 766.830738       | 1531.670183       | 766.338730       | 11 |
| 8  | 830.444052        | 415.725664      |                |                  | 812.433487     | 406.720382       | A    | <b>1462.648720</b> | 731.827998        | 1445.622171       | 723.314724       | 1444.638155       | 722.822716       | 10 |
| 9  | 959.486645        | 480.246961      |                |                  | 941.476080     | 471.241678       | E    | <b>1391.611606</b> | 696.309441        | 1374.585057       | 687.796167       | 1373.601041       | 687.304159       | 9  |
| 10 | 1058.555059       | 529.781168      |                |                  | 1040.544494    | 520.775885       | V    | <b>1262.569013</b> | 631.788145        | 1245.542464       | 623.274870       | 1244.558448       | 622.782862       | 8  |
| 11 | 1218.585708       | 609.796492      |                |                  | 1200.575143    | 600.791210       | C    | <b>1163.500599</b> | <b>582.253938</b> | 1146.474050       | 573.740663       | 1145.490034       | 573.248655       | 7  |
| 12 | 1657.811034       | 829.409155      | 1640.784485    | 820.895881       | 1639.800469    | 820.403873       | Q    | <b>1003.469950</b> | 502.238613        | 986.443401        | 493.725339       | 985.459385        | 493.233331       | 6  |
| 13 | 1817.841683       | 909.424480      | 1800.815134    | 900.911205       | 1799.831118    | 900.419197       | C    | <b>564.244624</b>  | 282.625950        | <b>547.218075</b> | 274.112676       | 546.234059        | 273.620668       | 5  |
| 14 | 1888.878797       | 944.943037      | 1871.852248    | 936.429762       | 1870.868232    | 935.937754       | A    | <b>404.213975</b>  | 202.610626        | 387.187426        | 194.097351       | 386.203410        | 193.605343       | 4  |
| 15 | 2017.921390       | 1009.464333     | 2000.894841    | 1000.951059      | 1999.910825    | 1000.459051      | E    | <b>333.176861</b>  | 167.092069        | 316.150312        | 158.578794       | <b>315.166296</b> | 158.086786       | 3  |
| 16 | 2074.942854       | 1037.975065     | 2057.916305    | 1029.461790      | 2056.932289    | 1028.969782      | G    | <b>204.134268</b>  | 102.570772        | 187.107719        | 94.057497        |                   |                  | 2  |
| 17 |                   |                 |                |                  |                |                  | K    | <b>147.112804</b>  | 74.060040         | 130.086255        | 65.546765        |                   |                  | 1  |

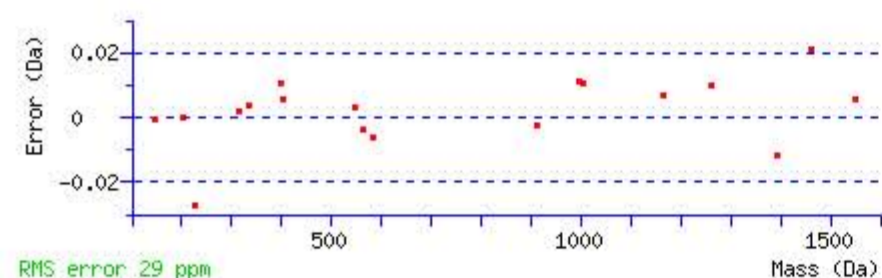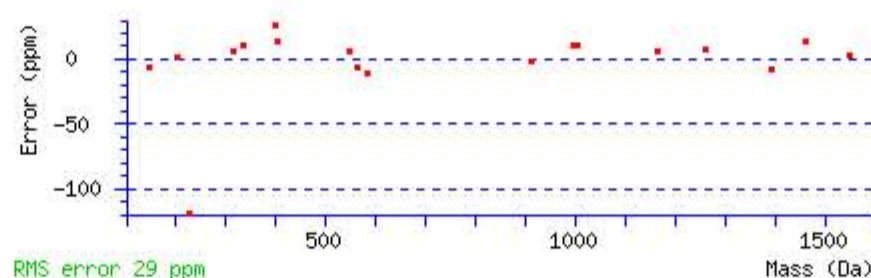

NCBI BLAST search of [LLATLCSAEVCQCAEGK](#)

(Parameters: blastp, nr protein database, expect=20000, no filter, PAM30)

Other BLAST [web gateways](#)

All matches to this query

| Score | Mr(calc):   | Delta     | Sequence                          |
|-------|-------------|-----------|-----------------------------------|
| 49.7  | 2220.041092 | -0.002170 | <a href="#">LLATLCSAEVCQCAEGK</a> |

Mascot: <http://www.matrixscience.com/>

**Peptide View**

MS/MS Fragmentation of **GCGEQTMIIYLAPTLAASR**

Found in **CO4A\_HUMAN**, Complement C4-A OS=Homo sapiens GN=C4A PE=1 SV=2

Match to Query 44062: 2249.109492 from(750.710440,3+) rtinseconds(2515) index(48930)

Title: Locus:1.1.1.3588.11 File:"2013-07-02 CLN FXIII 180 min 3rd F 4.wiff"

Data file C:\Program Files (x86)\Matrix Science\Mascot Daemon\mgf9 FXIII 180 min 3rd\mascot\_daemon\_merge.mgf

Click mouse within plot area to zoom in by factor of two about that point

Or, Plot from  to  Da

Label all possible matches  Label matches used for scoring

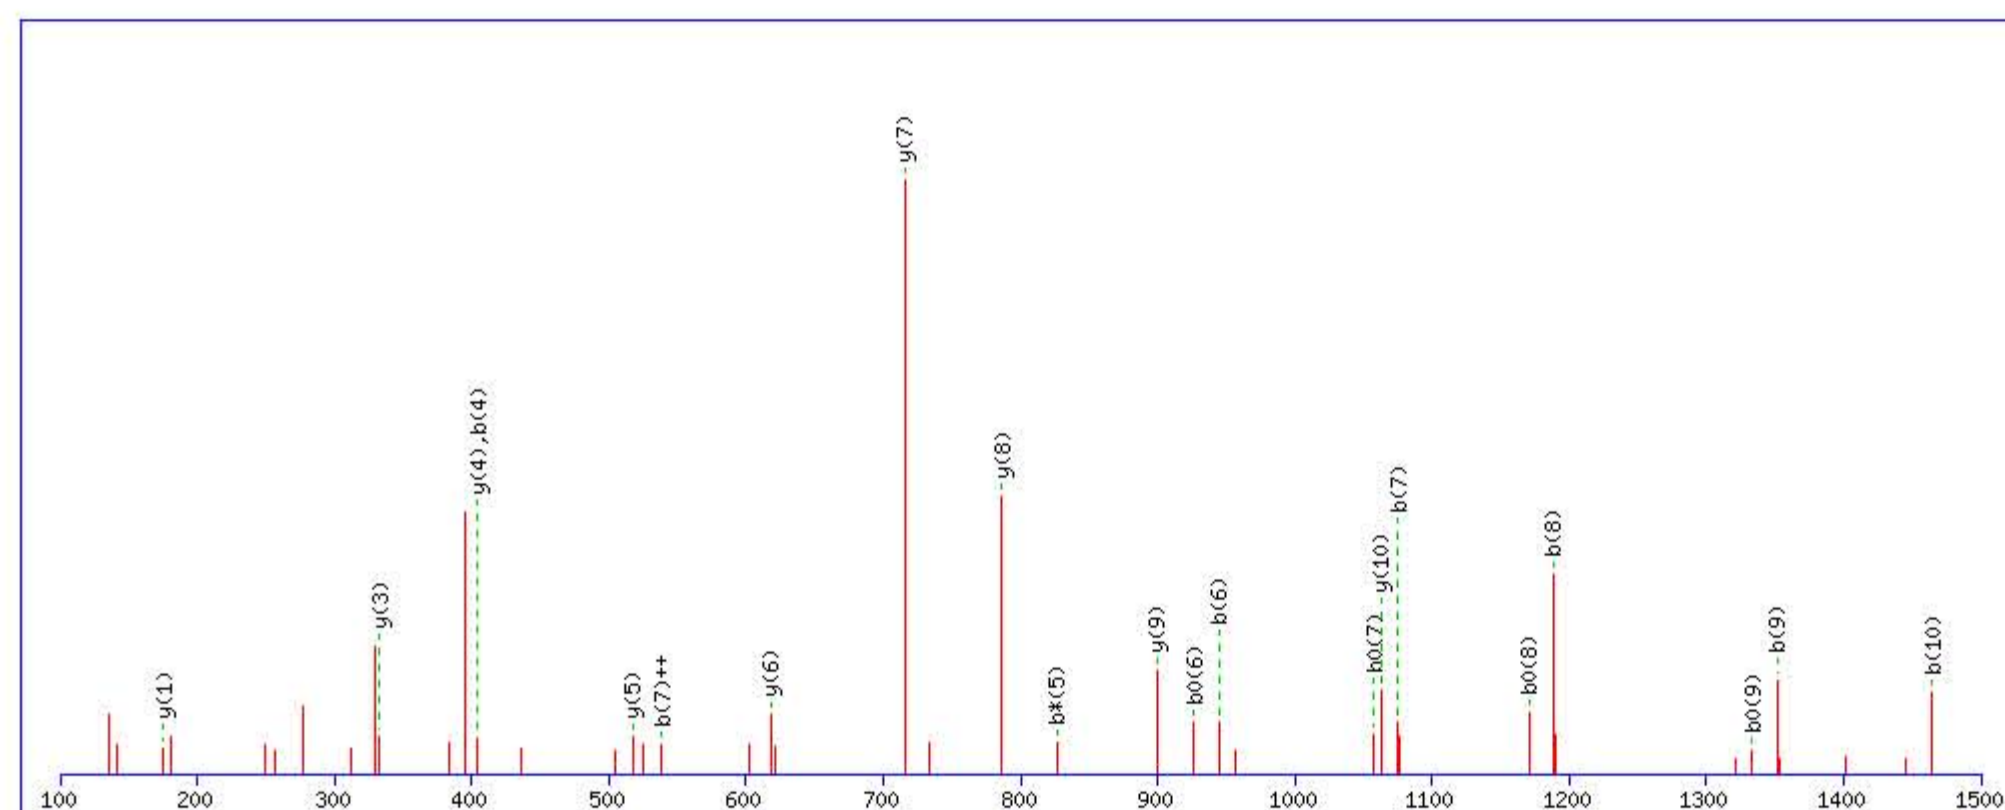

Monoisotopic mass of neutral peptide Mr(calc): 2249.100647

Fixed modifications: Carbamidomethyl (C) (apply to specified residues or termini only)

Variable modifications:

Q5 : Biotin:Thermo-21345 (Q)

Ions Score: 38 Expect: 0.0011

Matches : 21/188 fragment ions using 45 most intense peaks [\(help\)](#)

| #  | b                  | b <sup>++</sup>   | b <sup>*</sup>    | b <sup>*++</sup> | b <sup>0</sup>     | b <sup>0++</sup> | Seq. | y                  | y <sup>++</sup> | y <sup>*</sup> | y <sup>*++</sup> | y <sup>0</sup> | y <sup>0++</sup> | #  |
|----|--------------------|-------------------|-------------------|------------------|--------------------|------------------|------|--------------------|-----------------|----------------|------------------|----------------|------------------|----|
| 1  | 58.028740          | 29.518008         |                   |                  |                    |                  | G    |                    |                 |                |                  |                |                  | 18 |
| 2  | 218.059389         | 109.533333        |                   |                  |                    |                  | C    | 2193.086482        | 1097.046879     | 2176.059933    | 1088.533604      | 2175.075917    | 1088.041596      | 17 |
| 3  | 275.080853         | 138.044064        |                   |                  |                    |                  | G    | 2033.055833        | 1017.031555     | 2016.029284    | 1008.518280      | 2015.045268    | 1008.026272      | 16 |
| 4  | <b>404.123446</b>  | 202.565361        |                   |                  | 386.112881         | 193.560079       | E    | 1976.034369        | 988.520822      | 1959.007820    | 980.007548       | 1958.023804    | 979.515540       | 15 |
| 5  | 843.348772         | 422.178024        | <b>826.322223</b> | 413.664750       | 825.338207         | 413.172742       | Q    | 1846.991776        | 923.999526      | 1829.965227    | 915.486251       | 1828.981211    | 914.994243       | 14 |
| 6  | <b>944.396451</b>  | 472.701864        | 927.369902        | 464.188589       | <b>926.385886</b>  | 463.696581       | T    | 1407.766450        | 704.386863      | 1390.739901    | 695.873588       | 1389.755885    | 695.381580       | 13 |
| 7  | <b>1075.436936</b> | <b>538.222106</b> | 1058.410387       | 529.708832       | <b>1057.426371</b> | 529.216824       | M    | 1306.718771        | 653.863023      | 1289.692222    | 645.349749       | 1288.708206    | 644.857741       | 12 |
| 8  | <b>1188.521000</b> | 594.764138        | 1171.494451       | 586.250864       | <b>1170.510435</b> | 585.758855       | I    | 1175.678286        | 588.342781      | 1158.651737    | 579.829506       | 1157.667721    | 579.337498       | 11 |
| 9  | <b>1351.584329</b> | 676.295803        | 1334.557780       | 667.782528       | <b>1333.573764</b> | 667.290520       | Y    | <b>1062.594222</b> | 531.800749      | 1045.567673    | 523.287475       | 1044.583657    | 522.795466       | 10 |
| 10 | <b>1464.668393</b> | 732.837834        | 1447.641844       | 724.324560       | 1446.657828        | 723.832552       | L    | <b>899.530893</b>  | 450.269084      | 882.504344     | 441.755810       | 881.520328     | 441.263802       | 9  |
| 11 | 1535.705507        | 768.356391        | 1518.678958       | 759.843117       | 1517.694942        | 759.351109       | A    | <b>786.446829</b>  | 393.727053      | 769.420280     | 385.213778       | 768.436264     | 384.721770       | 8  |
| 12 | 1632.758271        | 816.882773        | 1615.731722       | 808.369499       | 1614.747706        | 807.877491       | P    | <b>715.409715</b>  | 358.208496      | 698.383166     | 349.695221       | 697.399150     | 349.203213       | 7  |
| 13 | 1733.805950        | 867.406613        | 1716.779401       | 858.893339       | 1715.795385        | 858.401330       | T    | <b>618.356951</b>  | 309.682114      | 601.330402     | 301.168839       | 600.346386     | 300.676831       | 6  |
| 14 | 1846.890014        | 923.948645        | 1829.863465       | 915.435370       | 1828.879449        | 914.943362       | L    | <b>517.309272</b>  | 259.158274      | 500.282723     | 250.644999       | 499.298707     | 250.152991       | 5  |
| 15 | 1917.927128        | 959.467202        | 1900.900579       | 950.953927       | 1899.916563        | 950.461919       | A    | <b>404.225208</b>  | 202.616242      | 387.198659     | 194.102967       | 386.214643     | 193.610959       | 4  |
| 16 | 1988.964242        | 994.985759        | 1971.937693       | 986.472484       | 1970.953677        | 985.980476       | A    | <b>333.188094</b>  | 167.097685      | 316.161545     | 158.584410       | 315.177529     | 158.092402       | 3  |
| 17 | 2075.996270        | 1038.501773       | 2058.969721       | 1029.988498      | 2057.985705        | 1029.496490      | S    | 262.150980         | 131.579128      | 245.124431     | 123.065854       | 244.140415     | 122.573846       | 2  |
| 18 |                    |                   |                   |                  |                    |                  | R    | <b>175.118952</b>  | 88.063114       | 158.092403     | 79.549839        |                |                  | 1  |

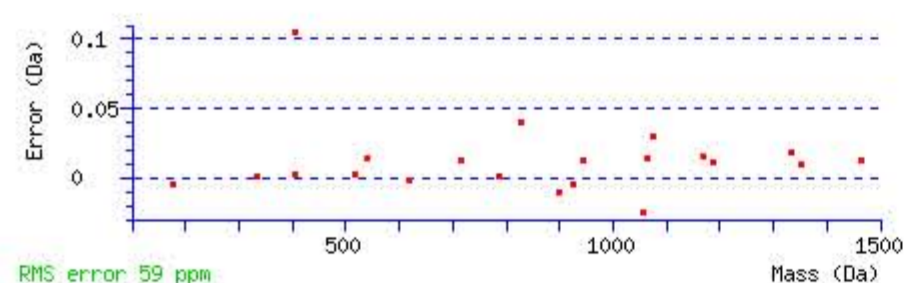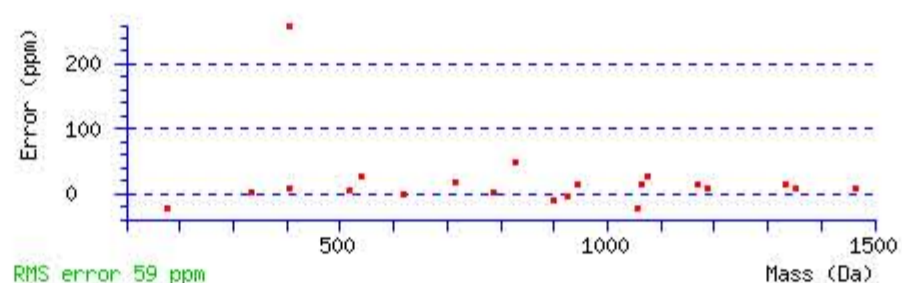

NCBI BLAST search of **GCGEQTMIIYLAPTLAASR**

(Parameters: blastp, nr protein database, expect=20000, no filter, PAM30)

Other BLAST [web gateways](#)

**All matches to this query**

| Score | Mr(calc):   | Delta     | Sequence                              |
|-------|-------------|-----------|---------------------------------------|
| 37.9  | 2249.100647 | 0.008845  | <a href="#">GCGEQTMIIYLAPTLAASR</a>   |
| 6.2   | 2249.115051 | -0.005559 | <a href="#">YSTSLYASPSMVHEGVAVVPR</a> |
| 3.2   | 2249.137527 | -0.028035 | <a href="#">QKFERPICVSWSTDVKGGR</a>   |
| 1.9   | 2249.096420 | 0.013072  | <a href="#">SDNTVTWLAAWTESVQNSIK</a>  |
| 0.3   | 2249.078659 | 0.030833  | <a href="#">FENGVAEGMVDPSPNPISAFR</a> |

MATRIX SCIENCE Mascot Search Results

Peptide View

MS/MS Fragmentation of DDPDAPLQPVTPLQLFEGR

Found in CO4A\_HUMAN, Complement C4-A OS=Homo sapiens GN=C4A PE=1 SV=2

Match to Query 46770: 2418.237822 from(807.086550,3+) rtinseconds(3010) index(52389)

Title: Locus:1.1.1.3756.16 File:"2013-07-02 CLN FXIII 180 min 3rd F 4.wiff"

Data file C:\Program Files (x86)\Matrix Science\Mascot Daemon\mgf9 FXIII 180 min 3rd\mascot\_daemon\_merge.mgf

Click mouse within plot area to zoom in by factor of two about that point

Or, Plot from 100 to 2000 Da Full range

Label all possible matches Label matches used for scoring

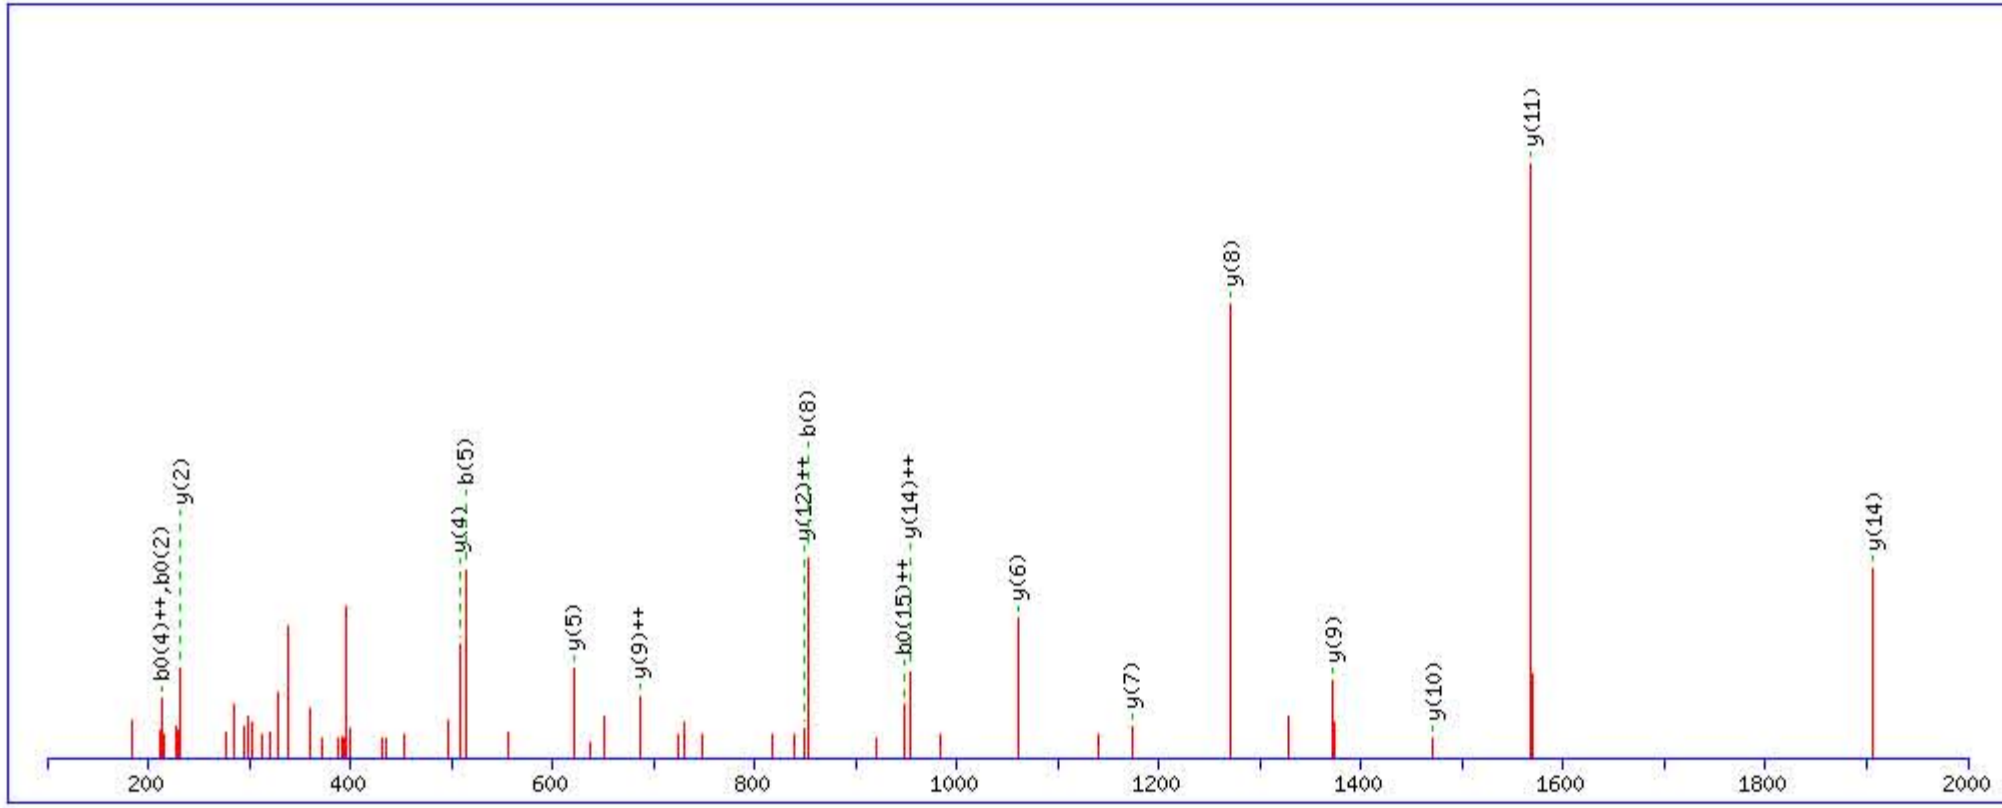

Monoisotopic mass of neutral peptide Mr(calc): 2418.225342

Fixed modifications: Carbamidomethyl (C) (apply to specified residues or termini only)

Variable modifications:

Q14 : Biotin:Thermo-21345 (Q)

Ions Score: 66 Expect: 8.1e-007

Matches : 18/198 fragment ions using 27 most intense peaks (help)

Table with columns: #, b, b++, b+, b\*+, b0, b0++, Seq., y, y++, y\*, y\*+, y0, y0++, #. Contains 19 rows of data.

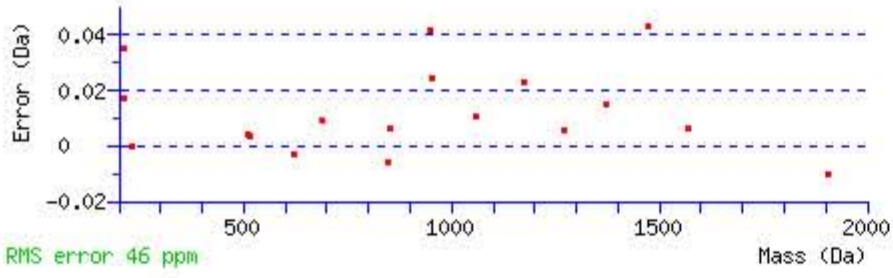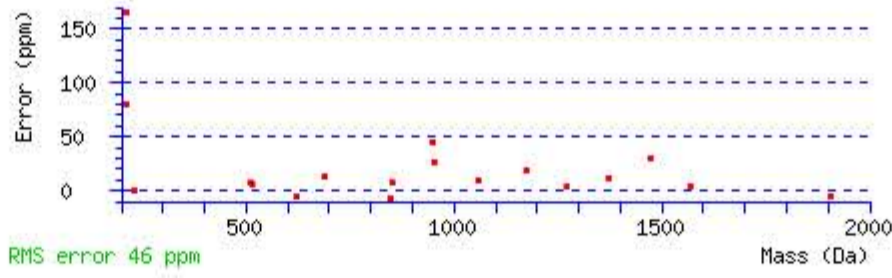

NCBI BLAST search of DDPDAPLQPVTPLQLFEGR

(Parameters: blastp, nr protein database, expect=20000, no filter, PAM30)

Other BLAST web gateways

All matches to this query

Table with columns: Score, Mr(calc):, Delta, Sequence. Lists sequence matches.

**MASCOT** Mascot Search Results

**Peptide View**

MS/MS Fragmentation of **AACAQLNDFLQEYGTQGCQV**  
 Found in **CO4A\_HUMAN**, Complement C4-A OS=Homo sapiens GN=C4A PE=1 SV=2

Match to Query 49357: 2583.165192 from(862.062340,3+) rtinseconds(2731) index(50237)  
 Title: Locus:1.1.1.3662.11 File:"2013-07-02 CLN FXIII 180 min 3rd F 4.wiff"  
 Data file C:\Program Files (x86)\Matrix Science\Mascot Daemon\mgf9 FXIII 180 min 3rd\mascot\_daemon\_merge.mgf

Click mouse within plot area to zoom in by factor of two about that point  
 Or, Plot from  to  Da   
 Label all possible matches  Label matches used for scoring

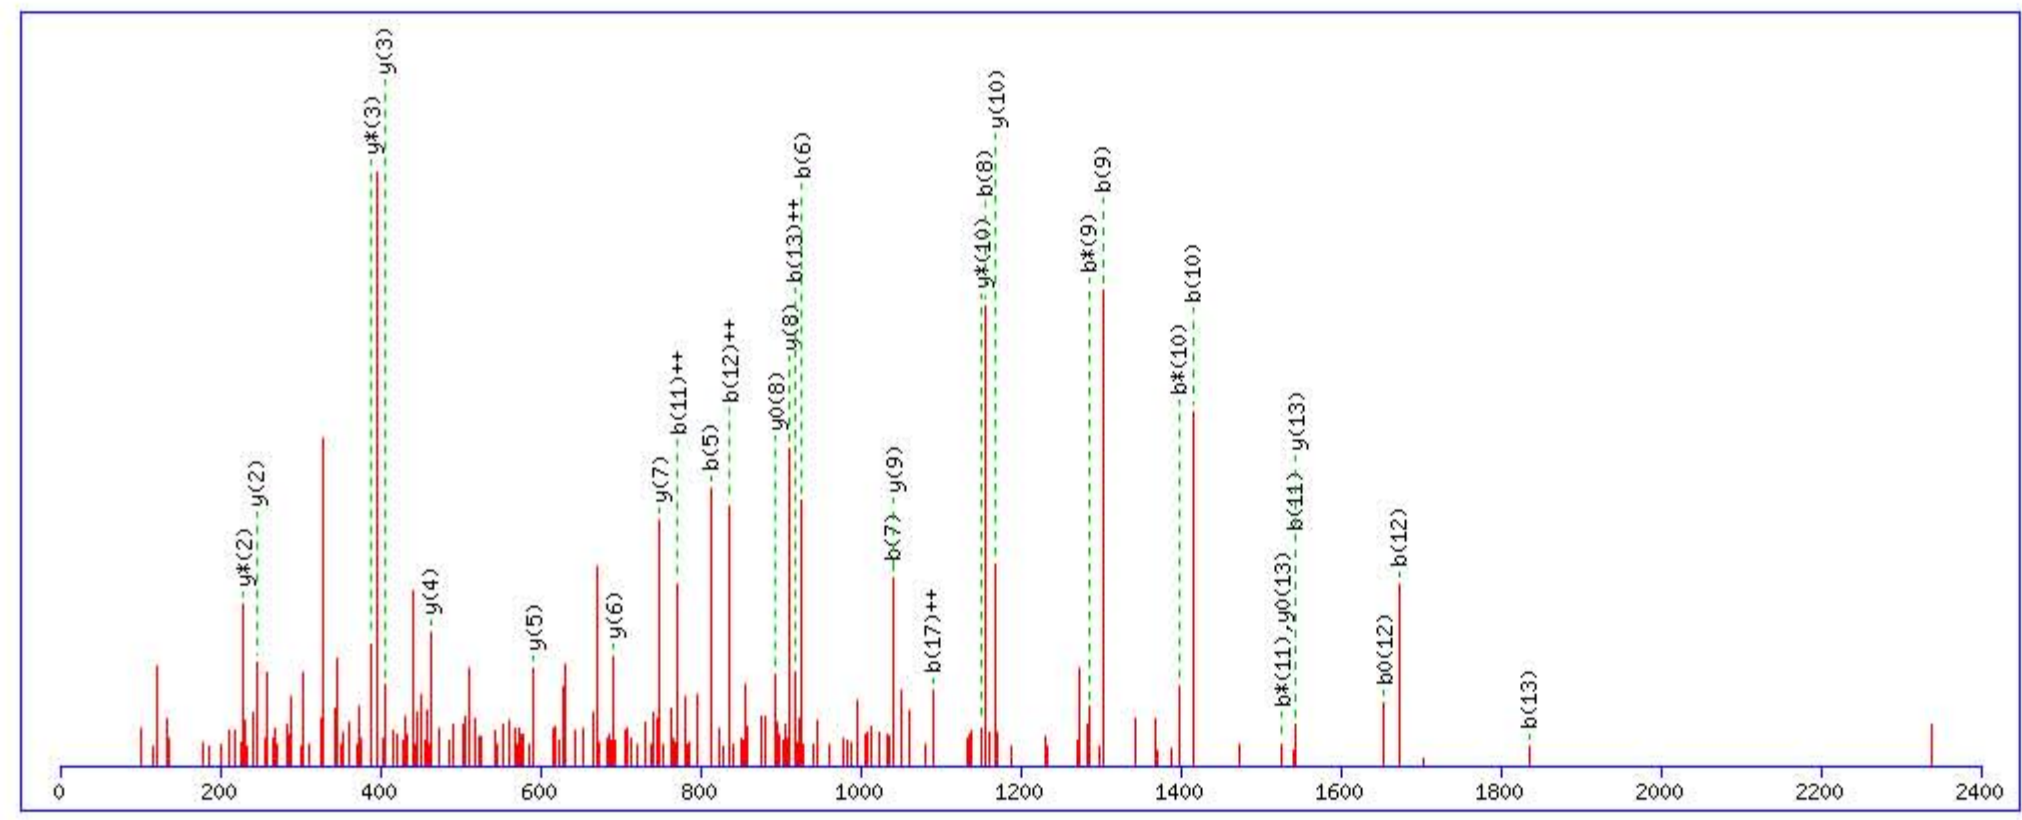

Monoisotopic mass of neutral peptide Mr(calc): 2583.155624  
 Fixed modifications: Carbamidomethyl (C) (apply to specified residues or termini only)  
 Variable modifications:  
 Q5 : Biotin:Thermo-21345 (Q)  
 Ions Score: 65 Expect: 3e-006  
 Matches : 32/194 fragment ions using 52 most intense peaks [\(help\)](#)

| #  | b                  | b <sup>++</sup>    | b <sup>*</sup>     | b <sup>+++</sup> | b <sup>0</sup>     | b <sup>0++</sup> | Seq. | y                  | y <sup>++</sup> | y <sup>*</sup>     | y <sup>+++</sup> | y <sup>0</sup>     | y <sup>0++</sup> | #  |
|----|--------------------|--------------------|--------------------|------------------|--------------------|------------------|------|--------------------|-----------------|--------------------|------------------|--------------------|------------------|----|
| 1  | 72.044390          | 36.525833          |                    |                  |                    |                  | A    |                    |                 |                    |                  |                    |                  | 20 |
| 2  | 143.081504         | 72.044390          |                    |                  |                    |                  | A    | 2513.125782        | 1257.066529     | 2496.099233        | 1248.553254      | 2495.115217        | 1248.061246      | 19 |
| 3  | 303.112153         | 152.059714         |                    |                  |                    |                  | C    | 2442.088668        | 1221.547972     | 2425.062119        | 1213.034697      | 2424.078103        | 1212.542689      | 18 |
| 4  | 374.149267         | 187.578271         |                    |                  |                    |                  | A    | 2282.058019        | 1141.532647     | 2265.031470        | 1133.019373      | 2264.047454        | 1132.527365      | 17 |
| 5  | <b>813.374593</b>  | 407.190935         | 796.348044         | 398.677660       |                    |                  | Q    | 2211.020905        | 1106.014090     | 2193.994356        | 1097.500816      | 2193.010340        | 1097.008808      | 16 |
| 6  | <b>926.458657</b>  | 463.732967         | 909.432108         | 455.219692       |                    |                  | L    | 1771.795579        | 886.401428      | 1754.769030        | 877.888153       | 1753.785014        | 877.396145       | 15 |
| 7  | <b>1040.501584</b> | 520.754430         | 1023.475035        | 512.241155       |                    |                  | N    | 1658.711515        | 829.859396      | 1641.684966        | 821.346121       | 1640.700950        | 820.854113       | 14 |
| 8  | <b>1155.528527</b> | 578.267902         | 1138.501978        | 569.754627       | 1137.517962        | 569.262619       | D    | <b>1544.668588</b> | 772.837932      | 1527.642039        | 764.324658       | <b>1526.658023</b> | 763.832650       | 13 |
| 9  | <b>1302.596941</b> | 651.802109         | <b>1285.570392</b> | 643.288834       | 1284.586376        | 642.796826       | F    | 1429.641645        | 715.324460      | 1412.615096        | 706.811186       | 1411.631080        | 706.319178       | 12 |
| 10 | <b>1415.681005</b> | 708.344141         | <b>1398.654456</b> | 699.830866       | 1397.670440        | 699.338858       | L    | 1282.573231        | 641.790253      | 1265.546682        | 633.276979       | 1264.562666        | 632.784971       | 11 |
| 11 | <b>1543.739583</b> | <b>772.373430</b>  | <b>1526.713034</b> | 763.860155       | 1525.729018        | 763.368147       | Q    | <b>1169.489167</b> | 585.248222      | <b>1152.462618</b> | 576.734947       | 1151.478602        | 576.242939       | 10 |
| 12 | <b>1672.782176</b> | <b>836.894726</b>  | 1655.755627        | 828.381452       | <b>1654.771611</b> | 827.889444       | E    | <b>1041.430589</b> | 521.218932      | 1024.404040        | 512.705658       | 1023.420024        | 512.213650       | 9  |
| 13 | <b>1835.845505</b> | <b>918.426391</b>  | 1818.818956        | 909.913116       | 1817.834940        | 909.421108       | Y    | <b>912.387996</b>  | 456.697636      | 895.361447         | 448.184361       | <b>894.377431</b>  | 447.692353       | 8  |
| 14 | 1892.866969        | 946.937123         | 1875.840420        | 938.423848       | 1874.856404        | 937.931840       | G    | <b>749.324667</b>  | 375.165971      | 732.298118         | 366.652697       | 731.314102         | 366.160689       | 7  |
| 15 | 1993.914648        | 997.460962         | 1976.888099        | 988.947688       | 1975.904083        | 988.455680       | T    | <b>692.303203</b>  | 346.655239      | 675.276654         | 338.141965       | 674.292638         | 337.649957       | 6  |
| 16 | 2121.973226        | 1061.490251        | 2104.946677        | 1052.976976      | 2103.962661        | 1052.484968      | Q    | <b>591.255524</b>  | 296.131400      | 574.228975         | 287.618125       |                    |                  | 5  |
| 17 | 2178.994690        | <b>1090.000983</b> | 2161.968141        | 1081.487708      | 2160.984125        | 1080.995700      | G    | <b>463.196946</b>  | 232.102111      | 446.170397         | 223.588836       |                    |                  | 4  |
| 18 | 2339.025339        | 1170.016307        | 2321.998790        | 1161.503033      | 2321.014774        | 1161.011025      | C    | <b>406.175482</b>  | 203.591379      | <b>389.148933</b>  | 195.078104       |                    |                  | 3  |
| 19 | 2467.083917        | 1234.045596        | 2450.057368        | 1225.532322      | 2449.073352        | 1225.040314      | Q    | <b>246.144833</b>  | 123.576054      | <b>229.118284</b>  | 115.062780       |                    |                  | 2  |
| 20 |                    |                    |                    |                  |                    |                  | V    | 118.086255         | 59.546765       |                    |                  |                    |                  | 1  |

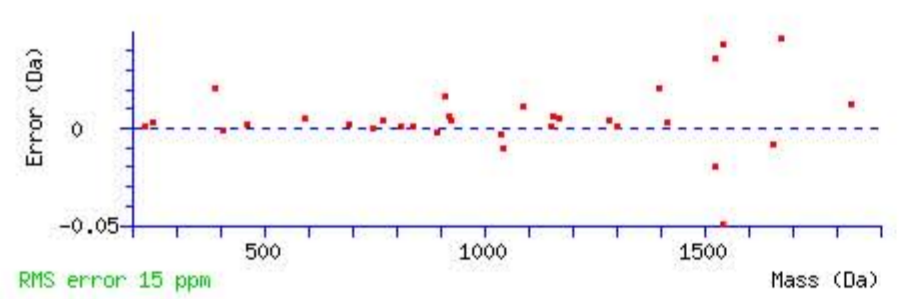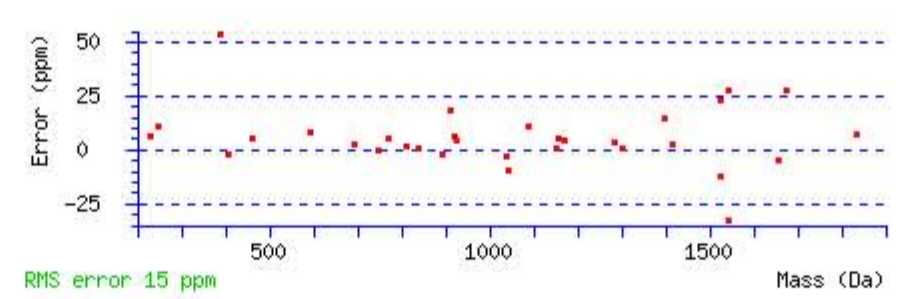

NCBI BLAST search of [AACAQLNDFLQEYGTQGCQV](#)  
 (Parameters: blastp, nr protein database, expect=20000, no filter, PAM30)  
 Other BLAST [web gateways](#)

**All matches to this query**

| Score | Mr(calc):   | Delta    | Sequence                             |
|-------|-------------|----------|--------------------------------------|
| 64.7  | 2583.155624 | 0.009568 | <a href="#">AACAQLNDFLQEYGTQGCQV</a> |
| 21.7  | 2583.155624 | 0.009568 | <a href="#">AACAQLNDFLQEYGTQGCQV</a> |





# **MASCOT** Mascot Search Results

## Peptide View

MS/MS Fragmentation of **GQAGLQR**

Found in **CO4A\_HUMAN**, Complement C4-A OS=Homo sapiens GN=C4A PE=1 SV=2

Match to Query 12627: 1039.550328 from(520.782440,2+) rtinseconds(1460) index(42646)

Title: Locus:1.1.1.3221.5 File:"2013-07-02 CLN FXIII 180 min 3rd F 4.wiff"

Data file C:\Program Files (x86)\Matrix Science\Mascot Daemon\mgf9 FXIII 180 min 3rd\mascot\_daemon\_merge.mgf

Click mouse within plot area to zoom in by factor of two about that point

Or, Plot from  to  Da

Label all possible matches  Label matches used for scoring

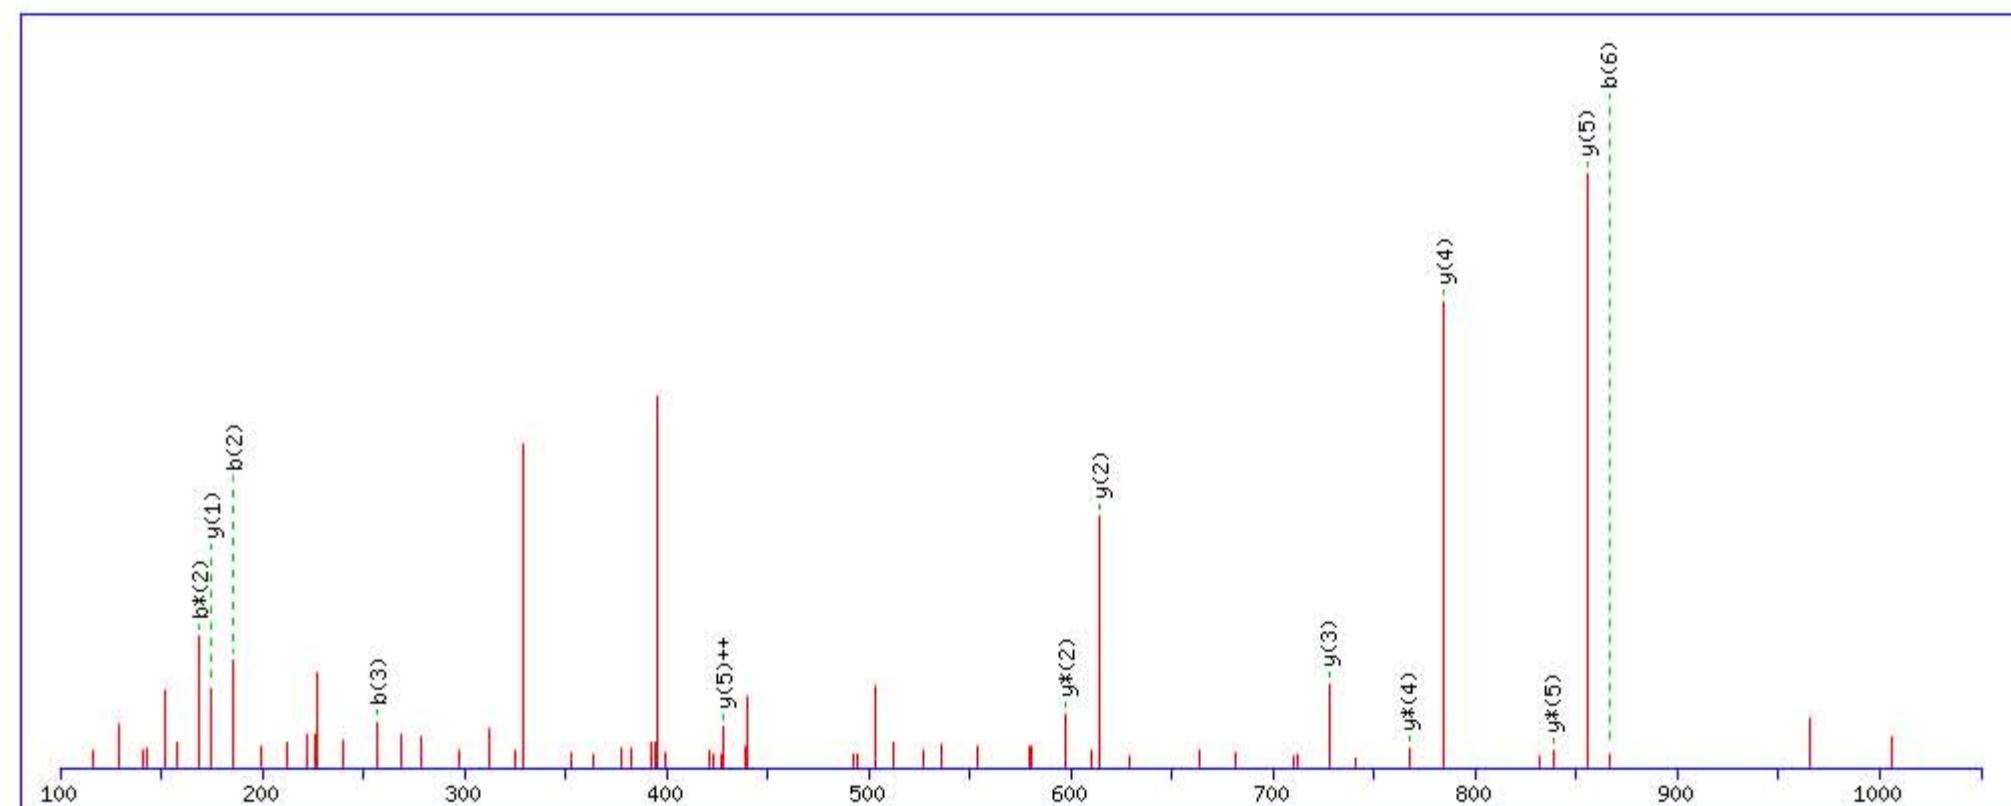

Monoisotopic mass of neutral peptide Mr(calc): 1039.559677

Fixed modifications: Carbamidomethyl (C) (apply to specified residues or termini only)

Variable modifications:

Q6 : Biotin:Thermo-21345 (Q)

Ions Score: 27 Expect: 0.028

Matches : 13/46 fragment ions using 26 most intense peaks [\(help\)](#)

| # | b                 | b <sup>++</sup> | b <sup>*</sup>    | b <sup>*++</sup> | Seq.     | y                 | y <sup>++</sup>   | y <sup>*</sup>    | y <sup>*++</sup> | # |
|---|-------------------|-----------------|-------------------|------------------|----------|-------------------|-------------------|-------------------|------------------|---|
| 1 | 58.028740         | 29.518008       |                   |                  | <b>G</b> |                   |                   |                   |                  | 7 |
| 2 | <b>186.087318</b> | 93.547297       | <b>169.060769</b> | 85.034023        | <b>Q</b> | 983.545498        | 492.276387        | 966.518949        | 483.763113       | 6 |
| 3 | <b>257.124432</b> | 129.065854      | 240.097883        | 120.552580       | <b>A</b> | <b>855.486920</b> | <b>428.247098</b> | <b>838.460371</b> | 419.733824       | 5 |
| 4 | 314.145896        | 157.576586      | 297.119347        | 149.063312       | <b>G</b> | <b>784.449806</b> | 392.728541        | <b>767.423257</b> | 384.215267       | 4 |
| 5 | 427.229960        | 214.118618      | 410.203411        | 205.605344       | <b>L</b> | <b>727.428342</b> | 364.217809        | 710.401793        | 355.704535       | 3 |
| 6 | <b>866.455286</b> | 433.731281      | 849.428737        | 425.218007       | <b>Q</b> | <b>614.344278</b> | 307.675777        | <b>597.317729</b> | 299.162503       | 2 |
| 7 |                   |                 |                   |                  | <b>R</b> | <b>175.118952</b> | 88.063114         | 158.092403        | 79.549840        | 1 |

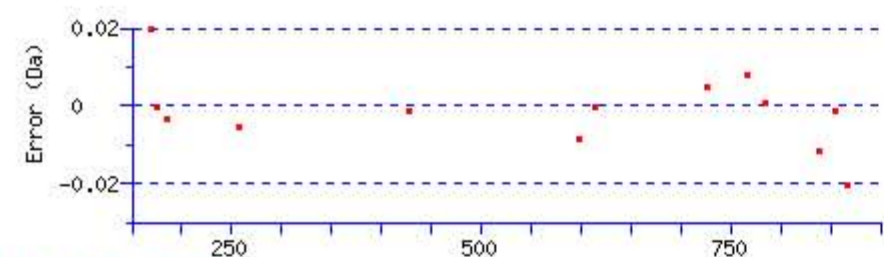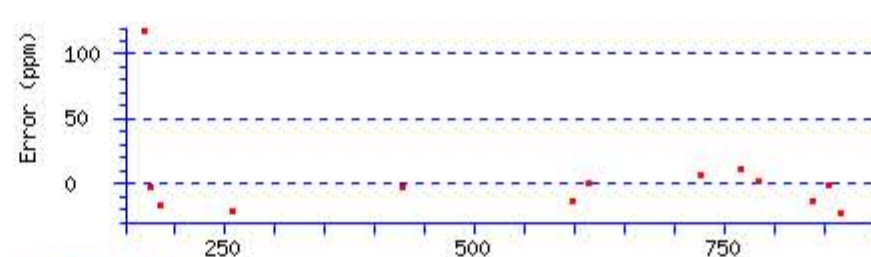

NCBI BLAST search of **GQAGLQR**

(Parameters: blastp, nr protein database, expect=20000, no filter, PAM30)

Other BLAST [web gateways](#)

## All matches to this query

| Score | Mr(calc):   | Delta     | Sequence                    |
|-------|-------------|-----------|-----------------------------|
| 26.9  | 1039.559677 | -0.009349 | <a href="#">GQAGLQR</a>     |
| 14.2  | 1039.559677 | -0.009349 | <a href="#">GQQIQR</a>      |
| 10.9  | 1039.541061 | 0.009267  | <a href="#">GQGDLLQPGR</a>  |
| 7.0   | 1039.559677 | -0.009349 | <a href="#">KGGPSQR</a>     |
| 6.8   | 1039.541046 | 0.009282  | <a href="#">NATTAPNPVR</a>  |
| 5.3   | 1039.552277 | -0.001949 | <a href="#">GQPQELGRR</a>   |
| 4.3   | 1039.552277 | -0.001949 | <a href="#">QRAALDGGPR</a>  |
| 1.8   | 1039.563492 | -0.013164 | <a href="#">AEGARARGPR</a>  |
| 1.8   | 1039.563492 | -0.013164 | <a href="#">SSHLRERR</a>    |
| 1.5   | 1039.541061 | 0.009267  | <a href="#">AGVTTPAPGNR</a> |

# MASCOT SEARCH RESULTS

## Peptide View

MS/MS Fragmentation of **AAANQMR**

Found in **CO4A\_HUMAN**, Complement C4-A OS=Homo sapiens GN=C4A PE=1 SV=2

Match to Query 13331: 1071.528988 from(536.771770,2+) rtinseconds(1406) index(42337)

Title: Locus:1.1.1.3202.12 File:"2013-07-02 CLN FXIII 180 min 3rd F 4.wiff"

Data file C:\Program Files (x86)\Matrix Science\Mascot Daemon\mgf9 FXIII 180 min 3rd\mascot\_daemon\_merge.mgf

Click mouse within plot area to zoom in by factor of two about that point

Or, Plot from  to  Da

Label all possible matches  Label matches used for scoring



Monoisotopic mass of neutral peptide Mr(calc): 1071.531723

Fixed modifications: Carbamidomethyl (C) (apply to specified residues or termini only)

Variable modifications:

Q5 : Biotin:Thermo-21345 (Q)

Ions Score: 29 Expect: 0.024

Matches : 10/42 fragment ions using 26 most intense peaks [\(help\)](#)

| # | b          | b <sup>++</sup> | b <sup>*</sup> | b <sup>*++</sup> | Seq. | y           | y <sup>++</sup> | y <sup>*</sup> | y <sup>*++</sup> | # |
|---|------------|-----------------|----------------|------------------|------|-------------|-----------------|----------------|------------------|---|
| 1 | 72.044390  | 36.525833       |                |                  | A    |             |                 |                |                  | 7 |
| 2 | 143.081504 | 72.044390       |                |                  | A    | 1001.501918 | 501.254597      | 984.475369     | 492.741323       | 6 |
| 3 | 214.118618 | 107.562947      |                |                  | A    | 930.464804  | 465.736040      | 913.438255     | 457.222766       | 5 |
| 4 | 328.161545 | 164.584410      | 311.134996     | 156.071136       | N    | 859.427690  | 430.217483      | 842.401141     | 421.704209       | 4 |
| 5 | 767.386871 | 384.197074      | 750.360322     | 375.683799       | Q    | 745.384763  | 373.196020      | 728.358214     | 364.682745       | 3 |
| 6 | 898.427356 | 449.717316      | 881.400807     | 441.204042       | M    | 306.159437  | 153.583357      | 289.132888     | 145.070082       | 2 |
| 7 |            |                 |                |                  | R    | 175.118952  | 88.063114       | 158.092403     | 79.549840        | 1 |

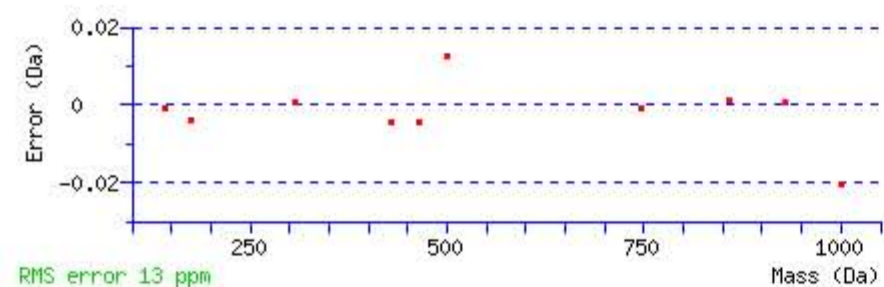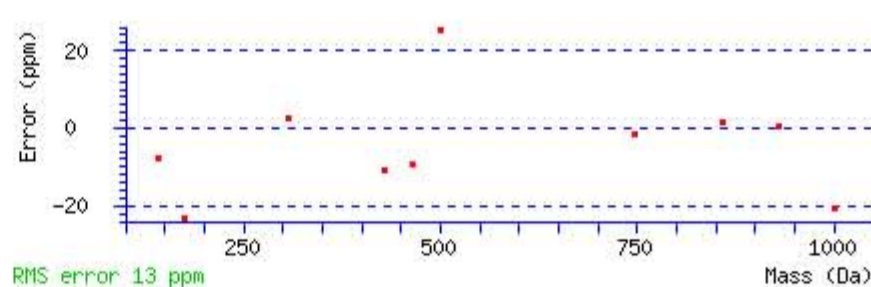

NCBI BLAST search of [AAANQMR](#)

(Parameters: blastp, nr protein database, expect=20000, no filter, PAM30)

Other BLAST [web gateways](#)

## All matches to this query

| Score | Mr(calc):   | Delta     | Sequence                    |
|-------|-------------|-----------|-----------------------------|
| 28.6  | 1071.531723 | -0.002735 | <a href="#">AAANQMR</a>     |
| 15.9  | 1071.530853 | -0.001865 | <a href="#">AAEESGAKGPR</a> |
| 5.4   | 1071.519608 | 0.009380  | <a href="#">AAESAEIEPR</a>  |
| 5.4   | 1071.539597 | -0.010609 | <a href="#">HHLIEHMR</a>    |

Mascot: <http://www.matrixscience.com/>

# MASCOT SCIENCE Mascot Search Results

## Peptide View

MS/MS Fragmentation of **VQQPDCR**

Found in **CO4A\_HUMAN**, Complement C4-A OS=Homo sapiens GN=C4A PE=1 SV=2

Match to Query 17990: 1212.569008 from(607.291780,2+) rtinseconds(1327) index(41941)

Title: Locus:1.1.1.3174.14 File:"2013-07-02 CLN FXIII 180 min 3rd F 4.wiff"

Data file C:\Program Files (x86)\Matrix Science\Mascot Daemon\mgf\9 FXIII 180 min 3rd\mascot\_daemon\_merge.mgf

Click mouse within plot area to zoom in by factor of two about that point

Or, Plot from  to  Da

Label all possible matches  Label matches used for scoring



Monoisotopic mass of neutral peptide Mr(calc): 1212.574356

Fixed modifications: Carbamidomethyl (C) (apply to specified residues or termini only)

Variable modifications:

Q2 : Biotin:Thermo-21345 (Q)

Ions Score: 35 Expect: 0.00063

Matches : 11/58 fragment ions using 15 most intense peaks [\(help\)](#)

| # | b                 | b <sup>++</sup>   | b <sup>*</sup> | b <sup>*++</sup> | b <sup>0</sup> | b <sup>0++</sup> | Seq. | y                  | y <sup>++</sup> | y <sup>*</sup>    | y <sup>*++</sup> | y <sup>0</sup> | y <sup>0++</sup>  | # |
|---|-------------------|-------------------|----------------|------------------|----------------|------------------|------|--------------------|-----------------|-------------------|------------------|----------------|-------------------|---|
| 1 | 100.075690        | 50.541483         |                |                  |                |                  | V    |                    |                 |                   |                  |                |                   | 7 |
| 2 | <b>539.301016</b> | 270.154146        | 522.274467     | 261.640872       |                |                  | Q    | <b>1114.513212</b> | 557.760244      | 1097.486663       | 549.246970       | 1096.502647    | 548.754962        | 6 |
| 3 | <b>667.359594</b> | 334.183435        | 650.333045     | 325.670161       |                |                  | Q    | <b>675.287886</b>  | 338.147581      | <b>658.261337</b> | 329.634307       | 657.277321     | <b>329.142299</b> | 5 |
| 4 | 764.412358        | 382.709817        | 747.385809     | 374.196543       |                |                  | P    | <b>547.229308</b>  | 274.118292      | 530.202759        | 265.605018       | 529.218743     | 265.113010        | 4 |
| 5 | <b>879.439301</b> | <b>440.223289</b> | 862.412752     | 431.710014       | 861.428736     | 431.218006       | D    | 450.176544         | 225.591910      | 433.149995        | 217.078635       | 432.165979     | 216.586627        | 3 |
| 6 | 1039.469950       | 520.238613        | 1022.443401    | 511.725339       | 1021.459385    | 511.233331       | C    | <b>335.149601</b>  | 168.078438      | 318.123052        | 159.565164       |                |                   | 2 |
| 7 |                   |                   |                |                  |                |                  | R    | <b>175.118952</b>  | 88.063114       | 158.092403        | 79.549839        |                |                   | 1 |



NCBI BLAST search of **VQQPDCR**

(Parameters: blastp, nr protein database, expect=20000, no filter, PAM30)

Other BLAST [web gateways](#)

### All matches to this query

| Score | Mr(calc):   | Delta     | Sequence                   |
|-------|-------------|-----------|----------------------------|
| 34.8  | 1212.574356 | -0.005348 | <a href="#">VQQPDCR</a>    |
| 15.7  | 1212.574356 | -0.005348 | <a href="#">VQQPDCR</a>    |
| 0.7   | 1212.582199 | -0.013191 | <a href="#">GRMPPSEFHR</a> |

# MASCOT SEARCH RESULTS

## Peptide View

MS/MS Fragmentation of **VEYGFQVK**

Found in **CO4A\_HUMAN**, Complement C4-A OS=Homo sapiens GN=C4A PE=1 SV=2

Match to Query 19793: 1279.659568 from(640.837060,2+) rtinseconds(2000) index(31887)

Title: Locus:1.1.1.3360.9 File:"2013-07-02 CLN FXIII 180 min 3rd F 3.wiff"

Data file C:\Program Files (x86)\Matrix Science\Mascot Daemon\mgf\9 FXIII 180 min 3rd\mascot\_daemon\_merge.mgf

Click mouse within plot area to zoom in by factor of two about that point

Or, Plot from  to  Da

Label all possible matches  Label matches used for scoring

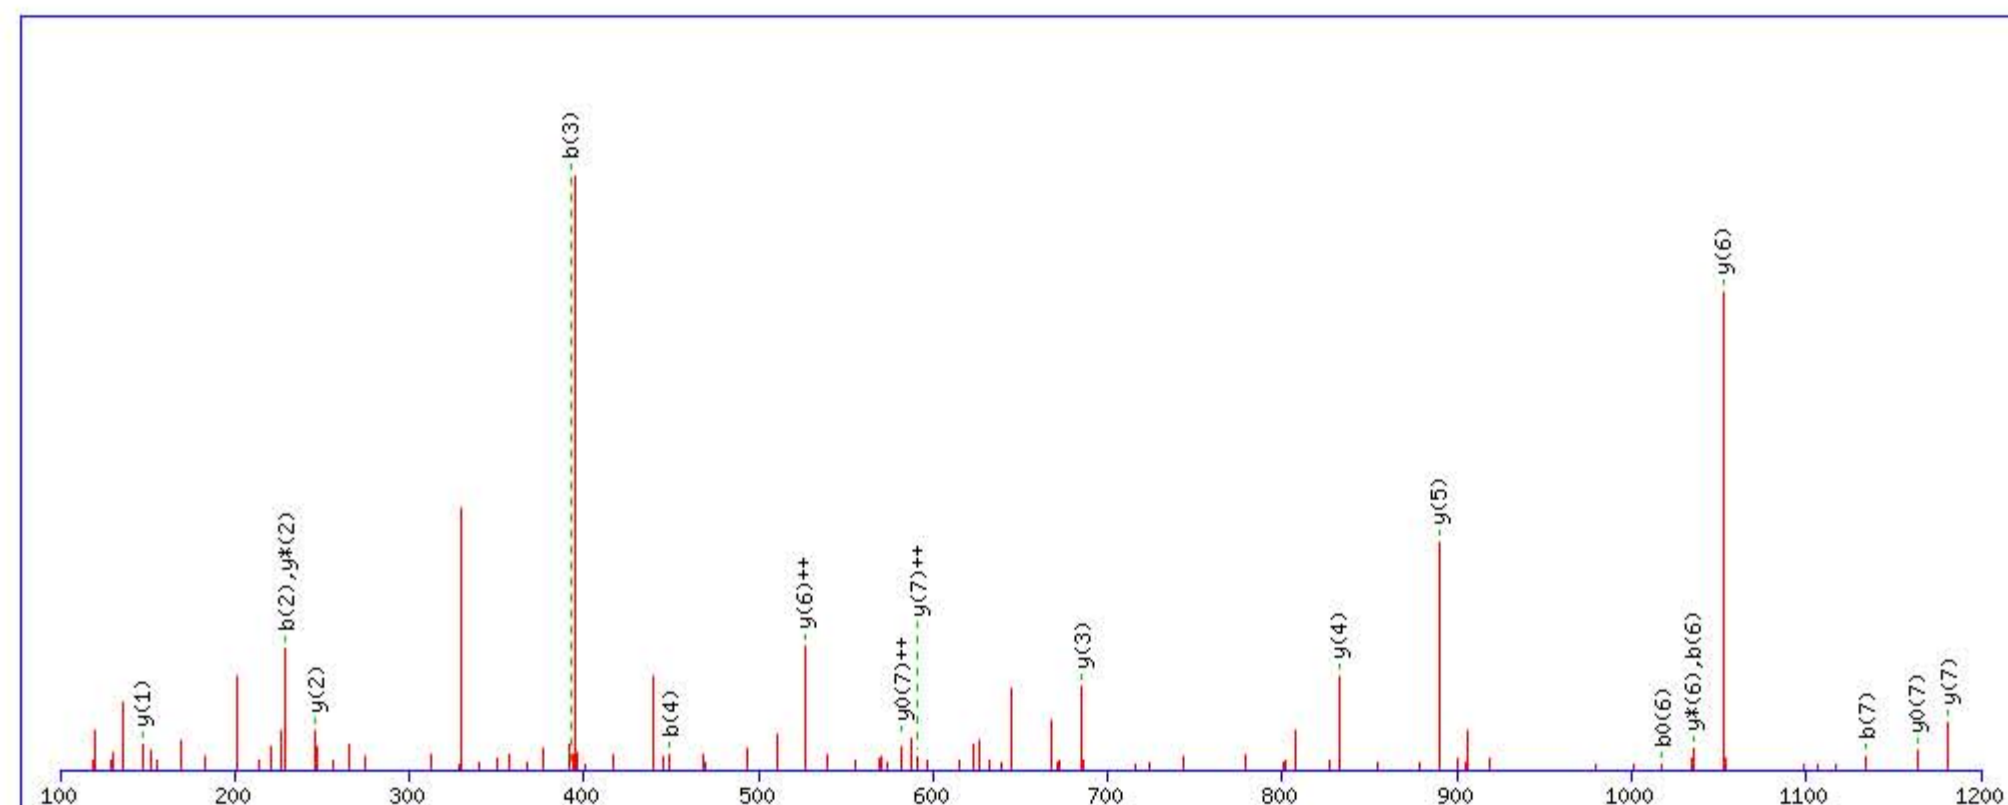

Monoisotopic mass of neutral peptide Mr(calc): 1279.663483

Fixed modifications: Carbamidomethyl (C) (apply to specified residues or termini only)

Variable modifications:

Q6 : Biotin:Thermo-21345 (Q)

Ions Score: 26 Expect: 0.01

Matches : 19/60 fragment ions using 51 most intense peaks [\(help\)](#)

| # | b                  | b <sup>++</sup> | b <sup>*</sup> | b <sup>*++</sup> | b <sup>0</sup>     | b <sup>0++</sup> | Seq. | y                  | y <sup>++</sup>   | y <sup>*</sup>     | y <sup>*++</sup> | y <sup>0</sup>     | y <sup>0++</sup>  | # |
|---|--------------------|-----------------|----------------|------------------|--------------------|------------------|------|--------------------|-------------------|--------------------|------------------|--------------------|-------------------|---|
| 1 | 100.075690         | 50.541483       |                |                  |                    |                  | V    |                    |                   |                    |                  |                    |                   | 8 |
| 2 | <b>229.118283</b>  | 115.062780      |                |                  | 211.107718         | 106.057497       | E    | <b>1181.602344</b> | <b>591.304810</b> | 1164.575795        | 582.791536       | <b>1163.591779</b> | <b>582.299528</b> | 7 |
| 3 | <b>392.181612</b>  | 196.594444      |                |                  | 374.171047         | 187.589162       | Y    | <b>1052.559751</b> | <b>526.783514</b> | <b>1035.533202</b> | 518.270239       |                    |                   | 6 |
| 4 | <b>449.203076</b>  | 225.105176      |                |                  | 431.192511         | 216.099894       | G    | <b>889.496422</b>  | 445.251849        | 872.469873         | 436.738575       |                    |                   | 5 |
| 5 | 596.271490         | 298.639383      |                |                  | 578.260925         | 289.634101       | F    | <b>832.474958</b>  | 416.741117        | 815.448409         | 408.227843       |                    |                   | 4 |
| 6 | <b>1035.496816</b> | 518.252046      | 1018.470267    | 509.738772       | <b>1017.486251</b> | 509.246764       | Q    | <b>685.406544</b>  | 343.206910        | 668.379995         | 334.693636       |                    |                   | 3 |
| 7 | <b>1134.565230</b> | 567.786253      | 1117.538681    | 559.272979       | 1116.554665        | 558.780971       | V    | <b>246.181218</b>  | 123.594247        | <b>229.154669</b>  | 115.080973       |                    |                   | 2 |
| 8 |                    |                 |                |                  |                    |                  | K    | <b>147.112804</b>  | 74.060040         | 130.086255         | 65.546765        |                    |                   | 1 |

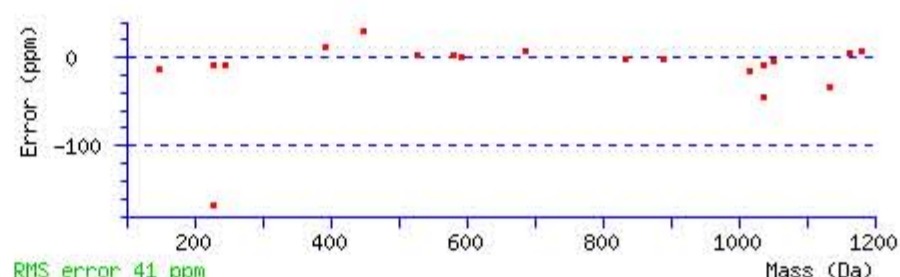

NCBI BLAST search of **VEYGFQVK**

(Parameters: blastp, nr protein database, expect=20000, no filter, PAM30)

Other BLAST [web gateways](#)

All matches to this query

| Score | Mr(calc):   | Delta     | Sequence                     |
|-------|-------------|-----------|------------------------------|
| 25.6  | 1279.663483 | -0.003915 | <a href="#">VEYGFQVK</a>     |
| 4.1   | 1279.663483 | -0.003915 | <a href="#">QFVGYLDK</a>     |
| 2.1   | 1279.677216 | -0.017648 | <a href="#">VFKTEDTQGKK</a>  |
| 0.5   | 1279.659470 | 0.000098  | <a href="#">VCSFGKQVVEK</a>  |
| 0.4   | 1279.652039 | 0.007529  | <a href="#">VERAITEASPAH</a> |
| 0.3   | 1279.652054 | 0.007514  | <a href="#">DAHDPQDKKVK</a>  |
| 0.1   | 1279.677200 | -0.017632 | <a href="#">EYVGKTSLVER</a>  |

Mascot: <http://www.matrixscience.com/>

# Mascot Search Results

## Peptide View

MS/MS Fragmentation of **VVEEQESR**

Found in **CO4A\_HUMAN**, Complement C4-A OS=Homo sapiens GN=C4A PE=1 SV=2

Match to Query 20080: 1285.627528 from(643.821040,2+) rtinseconds(1386) index(28142)

Title: Locus:1.1.1.3145.17 File:"2013-07-02 CLN FXIII 180 min 3rd F 3.wiff"

Data file C:\Program Files (x86)\Matrix Science\Mascot Daemon\mgf9 FXIII 180 min 3rd\mascot\_daemon\_merge.mgf

Click mouse within plot area to zoom in by factor of two about that point

Or, Plot from  to  Da

Label all possible matches  Label matches used for scoring



Monoisotopic mass of neutral peptide Mr(calc): 1285.633621

Fixed modifications: Carbamidomethyl (C) (apply to specified residues or termini only)

Variable modifications:

Q5 : Biotin:Thermo-21345 (Q)

Ions Score: 42 Expect: 0.0012

Matches : 22/70 fragment ions using 38 most intense peaks [\(help\)](#)

| # | b                  | b <sup>++</sup> | b <sup>+</sup> | b <sup>+++</sup>  | b <sup>0</sup>    | b <sup>0++</sup> | Seq. | y                  | y <sup>++</sup>   | y <sup>+</sup>     | y <sup>+++</sup> | y <sup>0</sup>     | y <sup>0++</sup>  | # |
|---|--------------------|-----------------|----------------|-------------------|-------------------|------------------|------|--------------------|-------------------|--------------------|------------------|--------------------|-------------------|---|
| 1 | 100.075690         | 50.541483       |                |                   |                   |                  | V    |                    |                   |                    |                  |                    |                   | 8 |
| 2 | <b>199.144104</b>  | 100.075690      |                |                   |                   |                  | V    | <b>1187.572499</b> | <b>594.289888</b> | 1170.545950        | 585.776613       | 1169.561934        | <b>585.284605</b> | 7 |
| 3 | <b>328.186697</b>  | 164.596987      |                |                   | <b>310.176132</b> | 155.591704       | E    | <b>1088.504085</b> | 544.755681        | <b>1071.477536</b> | 536.242406       | <b>1070.493520</b> | <b>535.750398</b> | 6 |
| 4 | 457.229290         | 229.118283      |                |                   | 439.218725        | 220.113001       | E    | <b>959.461492</b>  | 480.234384        | 942.434943         | 471.721110       | <b>941.450927</b>  | <b>471.229102</b> | 5 |
| 5 | <b>896.454616</b>  | 448.730946      | 879.428067     | <b>440.217672</b> | 878.444051        | 439.725664       | Q    | <b>830.418899</b>  | 415.713088        | 813.392350         | 407.199813       | <b>812.408334</b>  | 406.707805        | 4 |
| 6 | <b>1025.497209</b> | 513.252243      | 1008.470660    | 504.738968        | 1007.486644       | 504.246960       | E    | <b>391.193573</b>  | 196.100425        | 374.167024         | 187.587150       | <b>373.183008</b>  | 187.095142        | 3 |
| 7 | 1112.529237        | 556.768257      | 1095.502688    | 548.254982        | 1094.518672       | 547.762974       | S    | <b>262.150980</b>  | 131.579128        | 245.124431         | 123.065854       | 244.140415         | 122.573846        | 2 |
| 8 |                    |                 |                |                   |                   |                  | R    | <b>175.118952</b>  | 88.063114         | 158.092403         | 79.549839        |                    |                   | 1 |

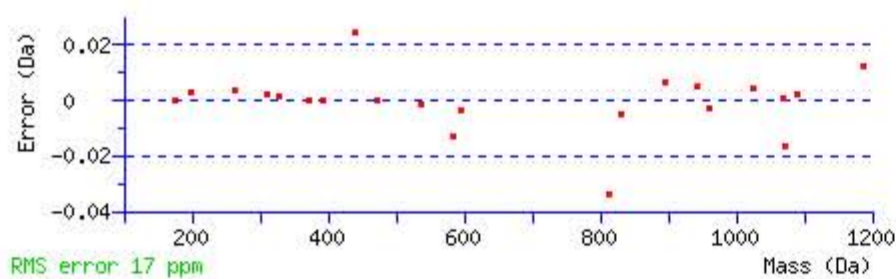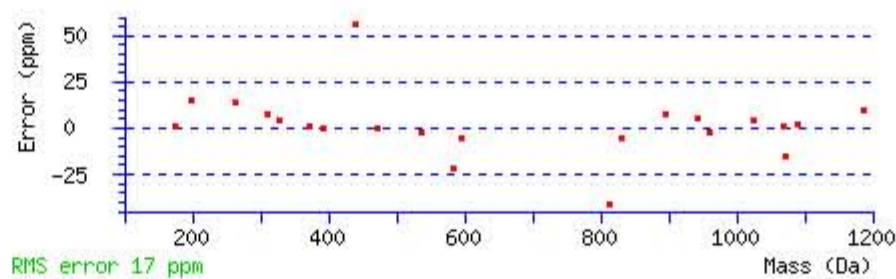

NCBI BLAST search of [VVEEQESR](#)

(Parameters: blastp, nr protein database, expect=20000, no filter, PAM30)

Other BLAST [web gateways](#)

All matches to this query

| Score | Mr(calc):   | Delta     | Sequence                 |
|-------|-------------|-----------|--------------------------|
| 42.0  | 1285.633621 | -0.006093 | <a href="#">VVEEQESR</a> |

Mascot: <http://www.matrixscience.com/>

# MASCOT SCIENCE Mascot Search Results

## Peptide View

MS/MS Fragmentation of **LGQYASPTAK**

Found in **CO4A\_HUMAN**, Complement C4-A OS=Homo sapiens GN=C4A PE=1 SV=2

Match to Query 21270: 1345.697228 from(673.855890,2+) rtinseconds(1635) index(29667)

Title: Locus:1.1.1.3232.22 File:"2013-07-02 CLN FXIII 180 min 3rd F 3.wiff"

Data file C:\Program Files (x86)\Matrix Science\Mascot Daemon\mgf\9 FXIII 180 min 3rd\mascot\_daemon\_merge.mgf

Click mouse within plot area to zoom in by factor of two about that point

Or, Plot from  to  Da

Label all possible matches  Label matches used for scoring

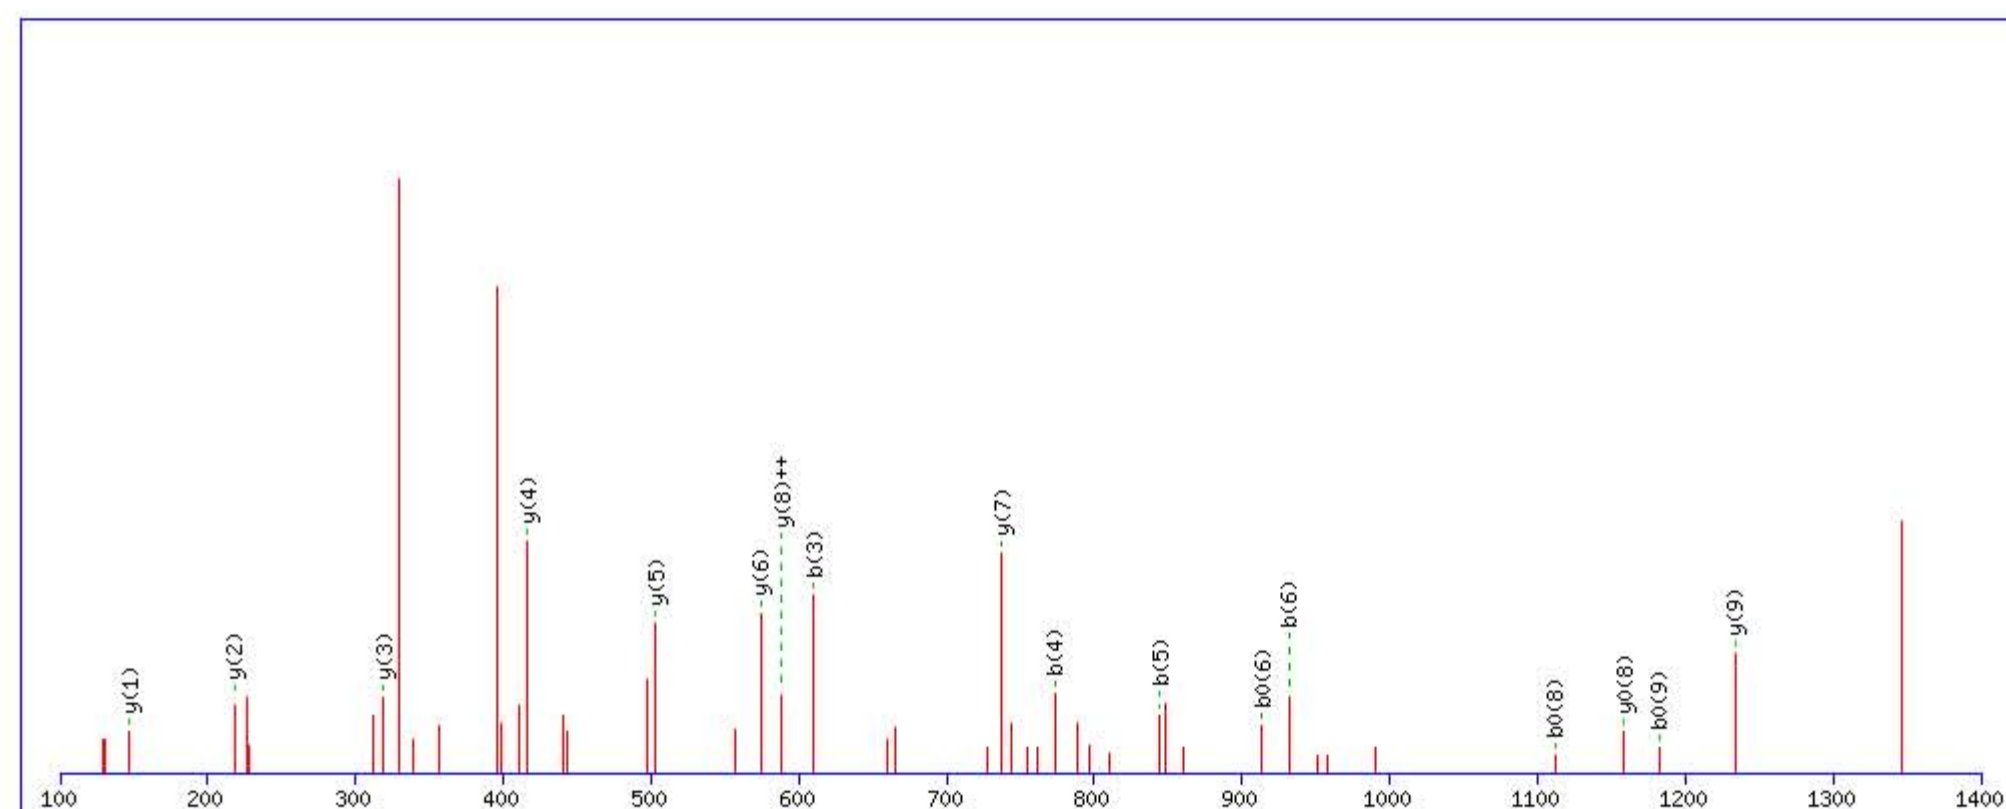

Monoisotopic mass of neutral peptide Mr(calc): 1345.706390

Fixed modifications: Carbamidomethyl (C) (apply to specified residues or termini only)

Variable modifications:

Q3 : Biotin:Thermo-21345 (Q)

Ions Score: 51 Expect: 8.5e-005

Matches : 17/90 fragment ions using 30 most intense peaks [\(help\)](#)

| #  | b                 | b <sup>++</sup> | b <sup>+</sup> | b <sup>+++</sup> | b <sup>0</sup>     | b <sup>0++</sup> | Seq. | y                  | y <sup>++</sup>   | y <sup>+</sup> | y <sup>+++</sup> | y <sup>0</sup>     | y <sup>0++</sup> | #  |
|----|-------------------|-----------------|----------------|------------------|--------------------|------------------|------|--------------------|-------------------|----------------|------------------|--------------------|------------------|----|
| 1  | 114.091340        | 57.549308       |                |                  |                    |                  | L    |                    |                   |                |                  |                    |                  | 10 |
| 2  | 171.112804        | 86.060040       |                |                  |                    |                  | G    | <b>1233.629622</b> | 617.318449        | 1216.603073    | 608.805175       | 1215.619057        | 608.313167       | 9  |
| 3  | <b>610.338130</b> | 305.672703      | 593.311581     | 297.159429       |                    |                  | Q    | 1176.608158        | <b>588.807717</b> | 1159.581609    | 580.294443       | <b>1158.597593</b> | 579.802435       | 8  |
| 4  | <b>773.401459</b> | 387.204368      | 756.374910     | 378.691093       |                    |                  | Y    | <b>737.382832</b>  | 369.195054        | 720.356283     | 360.681780       | 719.372267         | 360.189772       | 7  |
| 5  | <b>844.438573</b> | 422.722925      | 827.412024     | 414.209650       |                    |                  | A    | <b>574.319503</b>  | 287.663389        | 557.292954     | 279.150115       | 556.308938         | 278.658107       | 6  |
| 6  | <b>931.470601</b> | 466.238939      | 914.444052     | 457.725664       | <b>913.460036</b>  | 457.233656       | S    | <b>503.282389</b>  | 252.144832        | 486.255840     | 243.631558       | 485.271824         | 243.139550       | 5  |
| 7  | 1028.523365       | 514.765321      | 1011.496816    | 506.252046       | 1010.512800        | 505.760038       | P    | <b>416.250361</b>  | 208.628818        | 399.223812     | 200.115544       | 398.239796         | 199.623536       | 4  |
| 8  | 1129.571044       | 565.289160      | 1112.544495    | 556.775886       | <b>1111.560479</b> | 556.283878       | T    | <b>319.197597</b>  | 160.102436        | 302.171048     | 151.589162       | 301.187032         | 151.097154       | 3  |
| 9  | 1200.608158       | 600.807717      | 1183.581609    | 592.294443       | <b>1182.597593</b> | 591.802435       | A    | <b>218.149918</b>  | 109.578597        | 201.123369     | 101.065322       |                    |                  | 2  |
| 10 |                   |                 |                |                  |                    |                  | K    | <b>147.112804</b>  | 74.060040         | 130.086255     | 65.546765        |                    |                  | 1  |

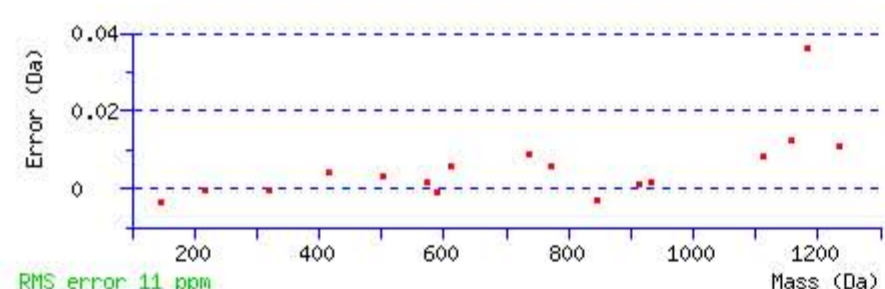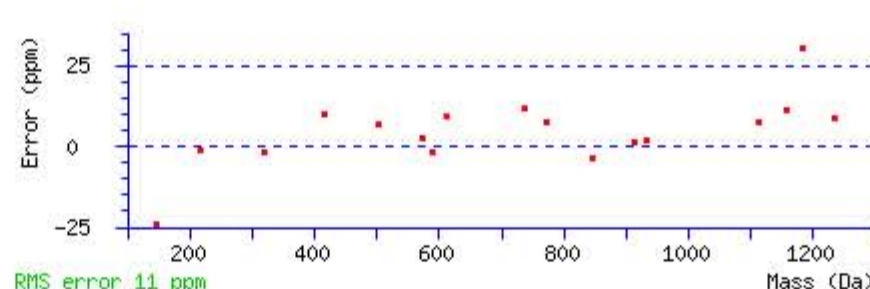

NCBI BLAST search of **LGQYASPTAK**

(Parameters: blastp, nr protein database, expect=20000, no filter, PAM30)

Other BLAST [web gateways](#)

## All matches to this query

| Score | Mr(calc):   | Delta     | Sequence                     |
|-------|-------------|-----------|------------------------------|
| 50.9  | 1345.706390 | -0.009162 | <a href="#">LGQYASPTAK</a>   |
| 7.1   | 1345.706406 | -0.009178 | <a href="#">QGLYTPQTK</a>    |
| 6.7   | 1345.706390 | -0.009162 | <a href="#">LGQYDQALK</a>    |
| 6.2   | 1345.692474 | 0.004754  | <a href="#">VASCRYPALGPR</a> |
| 2.6   | 1345.681213 | 0.016015  | <a href="#">ENKMTWAPKMK</a>  |
| 1.0   | 1345.692505 | 0.004723  | <a href="#">DHTVFGRVMLR</a>  |

Mascot: <http://www.matrixscience.com/>

# MASCOT SCIENCE Mascot Search Results

## Peptide View

MS/MS Fragmentation of **ITQVLHFTK**

Found in **CO4A\_HUMAN**, Complement C4-A OS=Homo sapiens GN=C4A PE=1 SV=2

Match to Query 23538: 1396.788582 from(466.603470,3+) rtinseconds(1965) index(45767)

Title: Locus:1.1.1.3397.3 File:"2013-07-02 CLN FXIII 180 min 3rd F 4.wiff"

Data file C:\Program Files (x86)\Matrix Science\Mascot Daemon\mgf\9 FXIII 180 min 3rd\mascot\_daemon\_merge.mgf

Click mouse within plot area to zoom in by factor of two about that point

Or, Plot from  to  Da

Label all possible matches  Label matches used for scoring



Monoisotopic mass of neutral peptide Mr(calc): 1396.790085

Fixed modifications: Carbamidomethyl (C) (apply to specified residues or termini only)

Variable modifications:

Q3 : Biotin:Thermo-21345 (Q)

Ions Score: 35 Expect: 0.00061

Matches : 6/88 fragment ions using 12 most intense peaks [\(help\)](#)

| # | b           | b <sup>++</sup> | b <sup>*</sup> | b <sup>+++</sup> | b <sup>0</sup> | b <sup>0++</sup> | Seq. | y           | y <sup>++</sup> | y <sup>*</sup> | y <sup>+++</sup> | y <sup>0</sup> | y <sup>0++</sup> | # |
|---|-------------|-----------------|----------------|------------------|----------------|------------------|------|-------------|-----------------|----------------|------------------|----------------|------------------|---|
| 1 | 114.091340  | 57.549308       |                |                  |                |                  | I    |             |                 |                |                  |                |                  | 9 |
| 2 | 215.139019  | 108.073147      |                |                  | 197.128454     | 99.067865        | T    | 1284.713292 | 642.860284      | 1267.686743    | 634.347010       | 1266.702727    | 633.855002       | 8 |
| 3 | 654.364345  | 327.685811      | 637.337796     | 319.172536       | 636.353780     | 318.680528       | Q    | 1183.665613 | 592.336445      | 1166.639064    | 583.823170       | 1165.655048    | 583.331162       | 7 |
| 4 | 753.432759  | 377.220018      | 736.406210     | 368.706743       | 735.422194     | 368.214735       | V    | 744.440287  | 372.723782      | 727.413738     | 364.210507       | 726.429722     | 363.718499       | 6 |
| 5 | 866.516823  | 433.762050      | 849.490274     | 425.248775       | 848.506258     | 424.756767       | L    | 645.371873  | 323.189575      | 628.345324     | 314.676300       | 627.361308     | 314.184292       | 5 |
| 6 | 1003.575735 | 502.291506      | 986.549186     | 493.778231       | 985.565170     | 493.286223       | H    | 532.287809  | 266.647543      | 515.261260     | 258.134268       | 514.277244     | 257.642260       | 4 |
| 7 | 1150.644149 | 575.825713      | 1133.617600    | 567.312438       | 1132.633584    | 566.820430       | F    | 395.228897  | 198.118086      | 378.202348     | 189.604812       | 377.218332     | 189.112804       | 3 |
| 8 | 1251.691828 | 626.349552      | 1234.665279    | 617.836278       | 1233.681263    | 617.344270       | T    | 248.160483  | 124.583879      | 231.133934     | 116.070605       | 230.149918     | 115.578597       | 2 |
| 9 |             |                 |                |                  |                |                  | K    | 147.112804  | 74.060040       | 130.086255     | 65.546765        |                |                  | 1 |

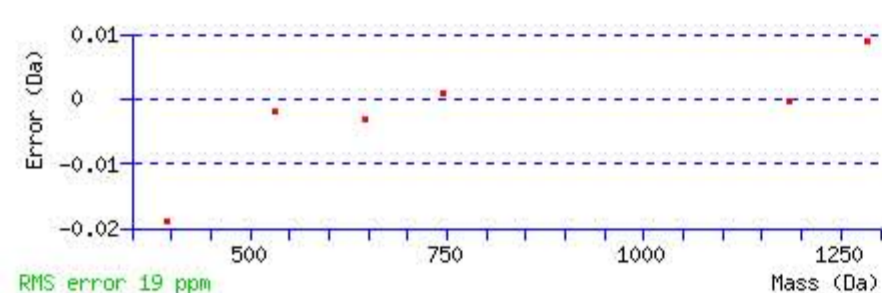

NCBI BLAST search of **ITQVLHFTK**

(Parameters: blastp, nr protein database, expect=20000, no filter, PAM30)

Other BLAST [web gateways](#)

All matches to this query

| Score | Mr(calc):   | Delta     | Sequence                     |
|-------|-------------|-----------|------------------------------|
| 34.6  | 1396.790085 | -0.001503 | <a href="#">ITQVLHFTK</a>    |
| 0.3   | 1396.792557 | -0.003975 | <a href="#">LLGELQEQIVQK</a> |

Mascot: <http://www.matrixscience.com/>

# MASCOT SEARCH RESULTS

## Peptide View

MS/MS Fragmentation of **GLEEELQFSLGSK**

Found in **CO4A\_HUMAN**, Complement C4-A OS=Homo sapiens GN=C4A PE=1 SV=2

Match to Query 34611: 1746.895648 from(874.455100,2+) rtinseconds(2556) index(49068)

Title: Locus:1.1.1.3602.7 File:"2013-07-02 CLN FXIII 180 min 3rd F 4.wiff"

Data file C:\Program Files (x86)\Matrix Science\Mascot Daemon\mgf9 FXIII 180 min 3rd\mascot\_daemon\_merge.mgf

Click mouse within plot area to zoom in by factor of two about that point

Or, Plot from  to  Da

Label all possible matches  Label matches used for scoring



Monoisotopic mass of neutral peptide Mr(calc): 1746.886200

Fixed modifications: Carbamidomethyl (C) (apply to specified residues or termini only)

Variable modifications:

Q7 : Biotin:Thermo-21345 (Q)

Ions Score: 80 Expect: 6.9e-008

Matches : 30/126 fragment ions using 49 most intense peaks [\(help\)](#)

| #  | b                  | b <sup>++</sup> | b <sup>*</sup> | b <sup>*++</sup>  | b <sup>0</sup>     | b <sup>0++</sup> | Seq. | y                  | y <sup>++</sup>   | y <sup>*</sup> | y <sup>*++</sup> | y <sup>0</sup>     | y <sup>0++</sup>  | #  |
|----|--------------------|-----------------|----------------|-------------------|--------------------|------------------|------|--------------------|-------------------|----------------|------------------|--------------------|-------------------|----|
| 1  | 58.028740          | 29.518008       |                |                   |                    |                  | G    |                    |                   |                |                  |                    |                   | 13 |
| 2  | <b>171.112804</b>  | 86.060040       |                |                   |                    |                  | L    | 1690.872035        | 845.939656        | 1673.845486    | 837.426381       | 1672.861470        | 836.934373        | 12 |
| 3  | 300.155397         | 150.581336      |                |                   | 282.144832         | 141.576054       | E    | <b>1577.787971</b> | 789.397624        | 1560.761422    | 780.884349       | <b>1559.777406</b> | <b>780.392341</b> | 11 |
| 4  | 429.197990         | 215.102633      |                |                   | 411.187425         | 206.097351       | E    | <b>1448.745378</b> | <b>724.876327</b> | 1431.718829    | 716.363053       | 1430.734813        | 715.871045        | 10 |
| 5  | <b>558.240583</b>  | 279.623930      |                |                   | 540.230018         | 270.618647       | E    | <b>1319.702785</b> | 660.355031        | 1302.676236    | 651.841756       | <b>1301.692220</b> | <b>651.349748</b> | 9  |
| 6  | <b>671.324647</b>  | 336.165962      |                |                   | 653.314082         | 327.160679       | L    | <b>1190.660192</b> | <b>595.833734</b> | 1173.633643    | 587.320460       | 1172.649627        | 586.828452        | 8  |
| 7  | <b>1110.549973</b> | 555.778624      | 1093.523424    | 547.265350        | 1092.539408        | 546.773342       | Q    | <b>1077.576128</b> | 539.291702        | 1060.549579    | 530.778428       | <b>1059.565563</b> | 530.286419        | 7  |
| 8  | <b>1257.618387</b> | 629.312832      | 1240.591838    | 620.799557        | <b>1239.607822</b> | 620.307549       | F    | <b>638.350802</b>  | 319.679039        | 621.324253     | 311.165765       | 620.340237         | 310.673757        | 6  |
| 9  | <b>1344.650415</b> | 672.828846      | 1327.623866    | 664.315571        | <b>1326.639850</b> | 663.823563       | S    | <b>491.282388</b>  | 246.144832        | 474.255839     | 237.631557       | 473.271823         | 237.139549        | 5  |
| 10 | <b>1457.734479</b> | 729.370878      | 1440.707930    | 720.857603        | <b>1439.723914</b> | 720.365595       | L    | <b>404.250360</b>  | 202.628818        | 387.223811     | 194.115543       | 386.239795         | 193.623535        | 4  |
| 11 | <b>1514.755943</b> | 757.881609      | 1497.729394    | <b>749.368335</b> | 1496.745378        | 748.876327       | G    | <b>291.166296</b>  | 146.086786        | 274.139747     | 137.573512       | 273.155731         | 137.081504        | 3  |
| 12 | 1601.787971        | 801.397624      | 1584.761422    | 792.884349        | 1583.777406        | 792.392341       | S    | <b>234.144832</b>  | 117.576054        | 217.118283     | 109.062780       | 216.134267         | 108.570772        | 2  |
| 13 |                    |                 |                |                   |                    |                  | K    | <b>147.112804</b>  | 74.060040         | 130.086255     | 65.546765        |                    |                   | 1  |

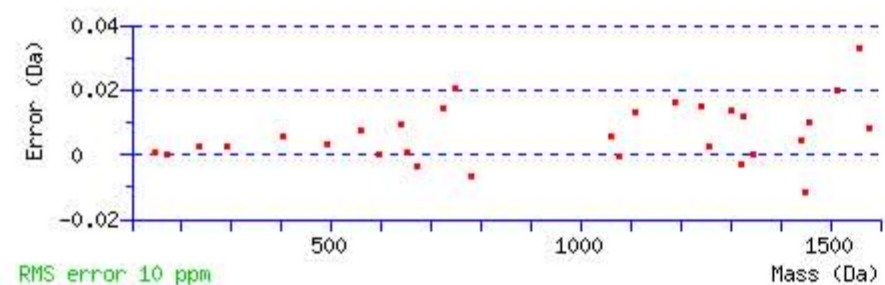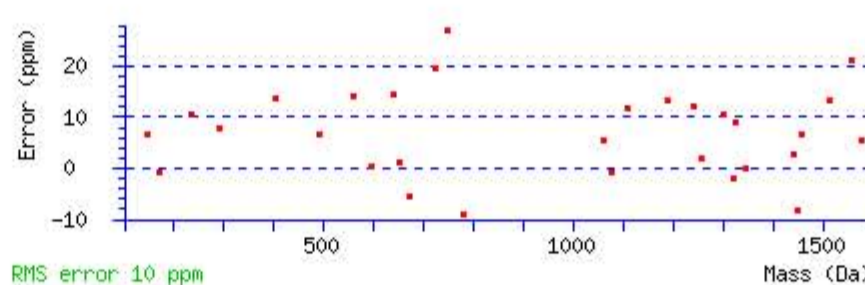

NCBI BLAST search of **GLEEELQFSLGSK**

(Parameters: blastp, nr protein database, expect=20000, no filter, PAM30)

Other BLAST [web gateways](#)

All matches to this query

| Score | Mr(calc):   | Delta    | Sequence                          |
|-------|-------------|----------|-----------------------------------|
| 79.6  | 1746.886200 | 0.009448 | <a href="#">GLEEELQFSLGSK</a>     |
| 3.2   | 1746.887558 | 0.008090 | <a href="#">AVQSKAFCAGGLAPGWK</a> |

Mascot: <http://www.matrixscience.com/>



# MASCOT Search Results

## Peptide View

MS/MS Fragmentation of **VLSLAQEQVGGSP**EK

Found in **CO4A\_HUMAN**, Complement C4-A OS=Homo sapiens GN=C4A PE=1 SV=2

Match to Query 36652: 1851.976662 from(618.332830,3+) rtinseconds(2001) index(46074)

Title: Locus:1.1.1.3409.10 File:"2013-07-02 CLN FXIII 180 min 3rd F 4.wiff"

Data file C:\Program Files (x86)\Matrix Science\Mascot Daemon\mgf9 FXIII 180 min 3rd\mascot\_daemon\_merge.mgf

Click mouse within plot area to zoom in by factor of two about that point

Or, Plot from  to  Da

Label all possible matches  Label matches used for scoring



Monoisotopic mass of neutral peptide Mr(calc): 1851.976425

Fixed modifications: Carbamidomethyl (C) (apply to specified residues or termini only)

Variable modifications:

Q8 : Biotin:Thermo-21345 (Q)

Ions Score: 58 Expect: 3.7e-005

Matches : 27/152 fragment ions using 57 most intense peaks [\(help\)](#)

| #  | b                  | b <sup>++</sup> | b <sup>*</sup> | b <sup>*++</sup> | b <sup>0</sup>    | b <sup>0++</sup>  | Seq. | y                  | y <sup>++</sup>   | y <sup>*</sup> | y <sup>*++</sup>  | y <sup>0</sup>     | y <sup>0++</sup>  | #  |
|----|--------------------|-----------------|----------------|------------------|-------------------|-------------------|------|--------------------|-------------------|----------------|-------------------|--------------------|-------------------|----|
| 1  | 100.075690         | 50.541483       |                |                  |                   |                   | V    |                    |                   |                |                   |                    |                   | 15 |
| 2  | <b>213.159754</b>  | 107.083515      |                |                  |                   |                   | L    | 1753.915298        | 877.461287        | 1736.888749    | 868.948013        | 1735.904733        | 868.456004        | 14 |
| 3  | <b>300.191782</b>  | 150.599529      |                |                  | <b>282.181217</b> | 141.594247        | S    | <b>1640.831234</b> | 820.919255        | 1623.804685    | 812.405981        | 1622.820669        | 811.913973        | 13 |
| 4  | 413.275846         | 207.141561      |                |                  | <b>395.265281</b> | 198.136279        | L    | 1553.799206        | 777.403241        | 1536.772657    | <b>768.889967</b> | 1535.788641        | <b>768.397958</b> | 12 |
| 5  | <b>484.312960</b>  | 242.660118      |                |                  | 466.302395        | 233.654836        | A    | <b>1440.715142</b> | 720.861209        | 1423.688593    | 712.347935        | 1422.704577        | 711.855927        | 11 |
| 6  | 612.371538         | 306.689407      | 595.344989     | 298.176133       | 594.360973        | 297.684125        | Q    | <b>1369.678028</b> | 685.342652        | 1352.651479    | 676.829378        | 1351.667463        | <b>676.337370</b> | 10 |
| 7  | <b>741.414131</b>  | 371.210704      | 724.387582     | 362.697429       | 723.403566        | 362.205421        | E    | <b>1241.619450</b> | <b>621.313363</b> | 1224.592901    | 612.800089        | <b>1223.608885</b> | 612.308080        | 9  |
| 8  | <b>1180.639457</b> | 590.823367      | 1163.612908    | 582.310092       | 1162.628892       | <b>581.818084</b> | Q    | <b>1112.576857</b> | 556.792066        | 1095.550308    | 548.278792        | 1094.566292        | 547.786784        | 8  |
| 9  | 1279.707871        | 640.357574      | 1262.681322    | 631.844299       | 1261.697306       | 631.352291        | V    | <b>673.351531</b>  | 337.179404        | 656.324982     | 328.666129        | 655.340966         | 328.174121        | 7  |
| 10 | 1336.729335        | 668.868306      | 1319.702786    | 660.355031       | 1318.718770       | 659.863023        | G    | <b>574.283117</b>  | 287.645197        | 557.256568     | 279.131922        | 556.272552         | 278.639914        | 6  |
| 11 | 1393.750799        | 697.379037      | 1376.724250    | 688.865763       | 1375.740234       | 688.373755        | G    | <b>517.261653</b>  | 259.134465        | 500.235104     | 250.621190        | <b>499.251088</b>  | 250.129182        | 5  |
| 12 | 1480.782827        | 740.895052      | 1463.756278    | 732.381777       | 1462.772262       | 731.889769        | S    | 460.240189         | 230.623732        | 443.213640     | 222.110458        | 442.229624         | 221.618450        | 4  |
| 13 | 1577.835591        | 789.421434      | 1560.809042    | 780.908159       | 1559.825026       | 780.416151        | P    | <b>373.208161</b>  | 187.107718        | 356.181612     | 178.594444        | <b>355.197596</b>  | 178.102436        | 3  |
| 14 | 1706.878184        | 853.942730      | 1689.851635    | 845.429456       | 1688.867619       | 844.937447        | E    | <b>276.155397</b>  | 138.581336        | 259.128848     | 130.068062        | <b>258.144832</b>  | 129.576054        | 2  |
| 15 |                    |                 |                |                  |                   |                   | K    | <b>147.112804</b>  | 74.060040         | 130.086255     | 65.546765         |                    |                   | 1  |

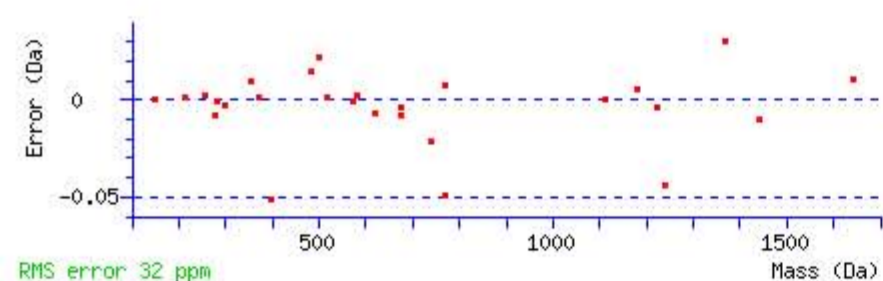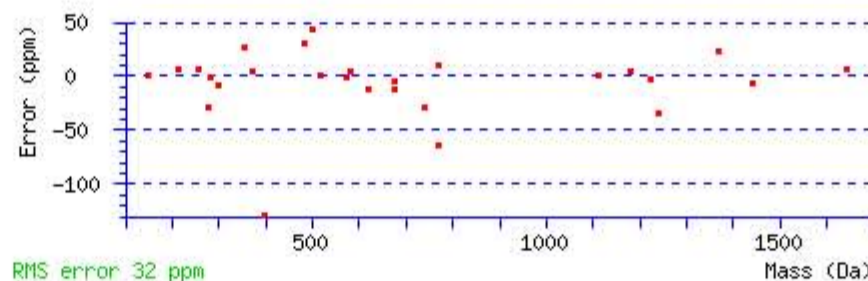

NCBI BLAST search of **VLSLAQEQVGGSP**EK

(Parameters: blastp, nr protein database, expect=20000, no filter, PAM30)

Other BLAST [web gateways](#)

All matches to this query

| Score | Mr(calc):   | Delta    | Sequence                         |
|-------|-------------|----------|----------------------------------|
| 58.3  | 1851.976425 | 0.000237 | <a href="#">VLSLAQEQVGGSP</a> EK |
| 37.0  | 1851.976425 | 0.000237 | <a href="#">VLSLAQEQVGGSP</a> EK |

Mascot: <http://www.matrixscience.com/>

# MASCOT SCIENCE Mascot Search Results

## Peptide View

MS/MS Fragmentation of **GPEVQLVAHSPWLK**

Found in **CO4A\_HUMAN**, Complement C4-A OS=Homo sapiens GN=C4A PE=1 SV=2

Match to Query 37065: 1871.013762 from(624.678530,3+) rtinseconds(2248) index(47552)

Title: Locus:1.1.1.3495.11 File:"2013-07-02 CLN FXIII 180 min 3rd F 4.wiff"

Data file C:\Program Files (x86)\Matrix Science\Mascot Daemon\mgf\9 FXIII 180 min 3rd\mascot\_daemon\_merge.mgf

Click mouse within plot area to zoom in by factor of two about that point

Or, Plot from  to  Da

Label all possible matches  Label matches used for scoring

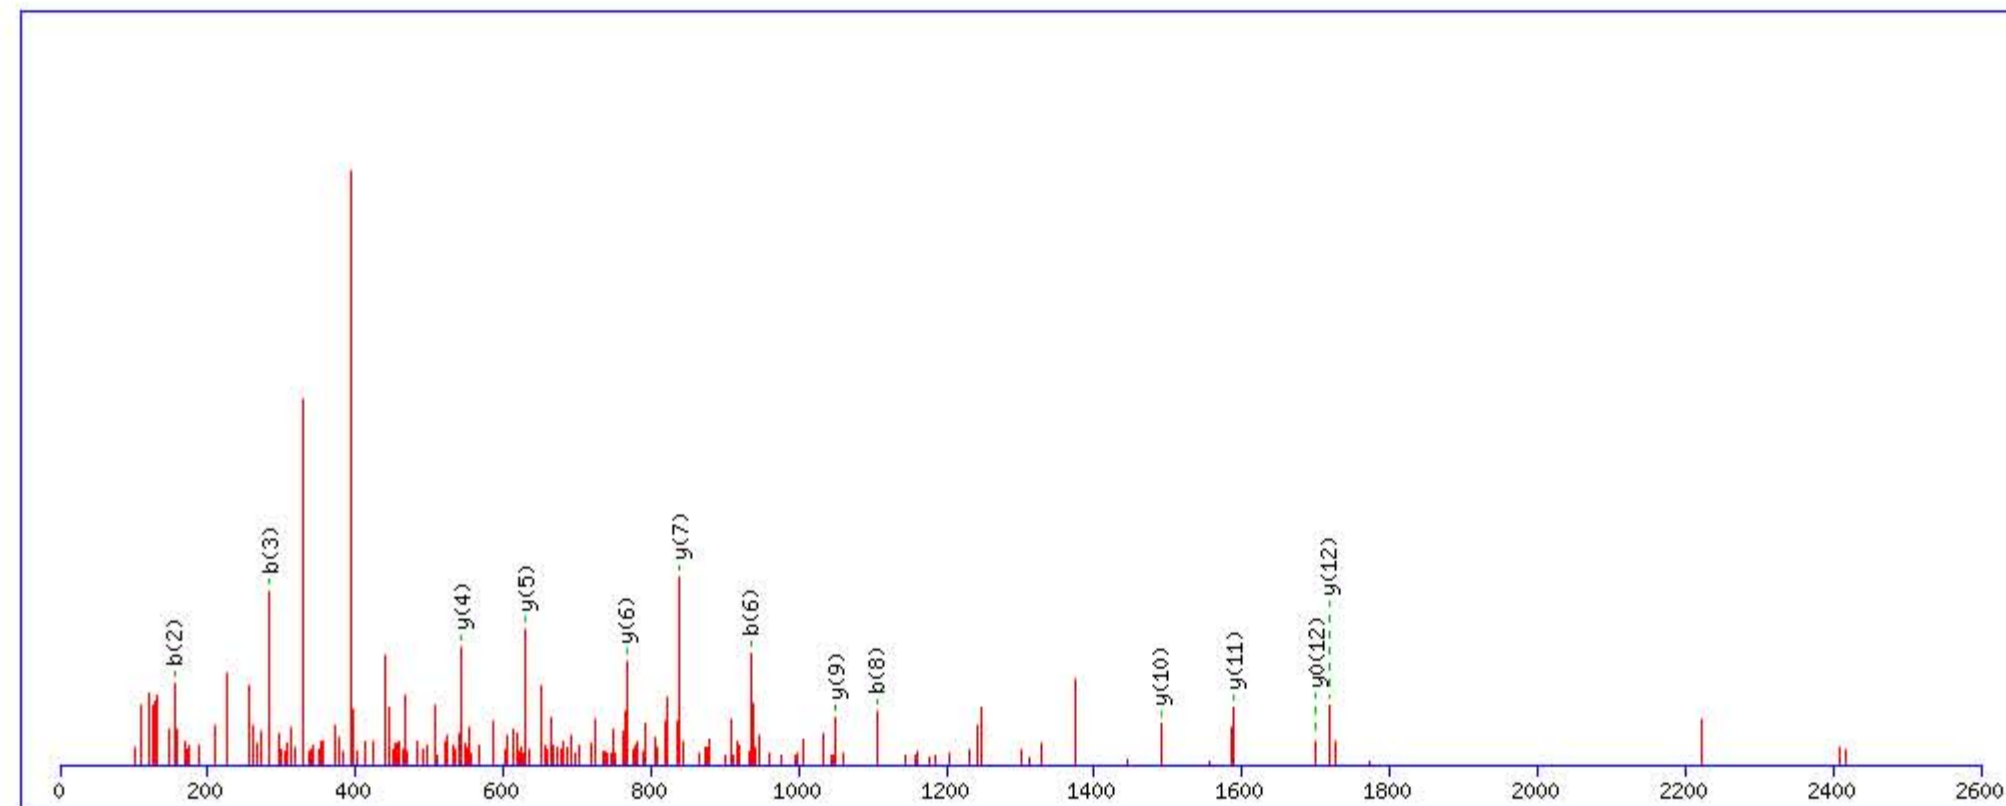

Monoisotopic mass of neutral peptide Mr(calc): 1871.012756

Fixed modifications: Carbamidomethyl (C) (apply to specified residues or termini only)

Variable modifications:

Q5 : Biotin:Thermo-21345 (Q)

Ions Score: 59 Expect: 7.5e-006

Matches : 13/136 fragment ions using 17 most intense peaks [\(help\)](#)

| #  | b                  | b <sup>++</sup> | b <sup>+</sup> | b <sup>+++</sup> | b <sup>0</sup> | b <sup>0++</sup> | Seq.     | y                  | y <sup>++</sup> | y <sup>+</sup> | y <sup>+++</sup> | y <sup>0</sup>     | y <sup>0++</sup> | #  |
|----|--------------------|-----------------|----------------|------------------|----------------|------------------|----------|--------------------|-----------------|----------------|------------------|--------------------|------------------|----|
| 1  | 58.028740          | 29.518008       |                |                  |                |                  | <b>G</b> |                    |                 |                |                  |                    |                  | 14 |
| 2  | <b>155.081504</b>  | 78.044390       |                |                  |                |                  | <b>P</b> | 1814.998574        | 908.002925      | 1797.972025    | 899.489651       | 1796.988009        | 898.997643       | 13 |
| 3  | <b>284.124097</b>  | 142.565687      |                |                  | 266.113532     | 133.560404       | <b>E</b> | <b>1717.945810</b> | 859.476543      | 1700.919261    | 850.963269       | <b>1699.935245</b> | 850.471261       | 12 |
| 4  | 383.192511         | 192.099894      |                |                  | 365.181946     | 183.094611       | <b>V</b> | <b>1588.903217</b> | 794.955247      | 1571.876668    | 786.441972       | 1570.892652        | 785.949964       | 11 |
| 5  | 822.417837         | 411.712557      | 805.391288     | 403.199282       | 804.407272     | 402.707274       | <b>Q</b> | <b>1489.834803</b> | 745.421040      | 1472.808254    | 736.907765       | 1471.824238        | 736.415757       | 10 |
| 6  | <b>935.501901</b>  | 468.254589      | 918.475352     | 459.741314       | 917.491336     | 459.249306       | <b>L</b> | <b>1050.609477</b> | 525.808377      | 1033.582928    | 517.295102       | 1032.598912        | 516.803094       | 9  |
| 7  | 1034.570315        | 517.788796      | 1017.543766    | 509.275521       | 1016.559750    | 508.783513       | <b>V</b> | 937.525413         | 469.266345      | 920.498864     | 460.753070       | 919.514848         | 460.261062       | 8  |
| 8  | <b>1105.607429</b> | 553.307353      | 1088.580880    | 544.794078       | 1087.596864    | 544.302070       | <b>A</b> | <b>838.456999</b>  | 419.732138      | 821.430450     | 411.218863       | 820.446434         | 410.726855       | 7  |
| 9  | 1242.666341        | 621.836809      | 1225.639792    | 613.323534       | 1224.655776    | 612.831526       | <b>H</b> | <b>767.419885</b>  | 384.213581      | 750.393336     | 375.700306       | 749.409320         | 375.208298       | 6  |
| 10 | 1329.698369        | 665.352823      | 1312.671820    | 656.839548       | 1311.687804    | 656.347540       | <b>S</b> | <b>630.360973</b>  | 315.684125      | 613.334424     | 307.170850       | 612.350408         | 306.678842       | 5  |
| 11 | 1426.751133        | 713.879205      | 1409.724584    | 705.365930       | 1408.740568    | 704.873922       | <b>P</b> | <b>543.328945</b>  | 272.168111      | 526.302396     | 263.654836       |                    |                  | 4  |
| 12 | 1612.830446        | 806.918861      | 1595.803897    | 798.405587       | 1594.819881    | 797.913579       | <b>W</b> | 446.276181         | 223.641728      | 429.249632     | 215.128454       |                    |                  | 3  |
| 13 | 1725.914510        | 863.460893      | 1708.887961    | 854.947619       | 1707.903945    | 854.455611       | <b>L</b> | 260.196868         | 130.602072      | 243.170319     | 122.088797       |                    |                  | 2  |
| 14 |                    |                 |                |                  |                |                  | <b>K</b> | 147.112804         | 74.060040       | 130.086255     | 65.546765        |                    |                  | 1  |

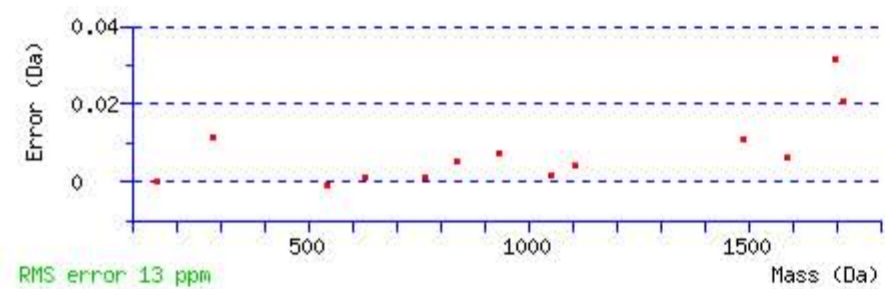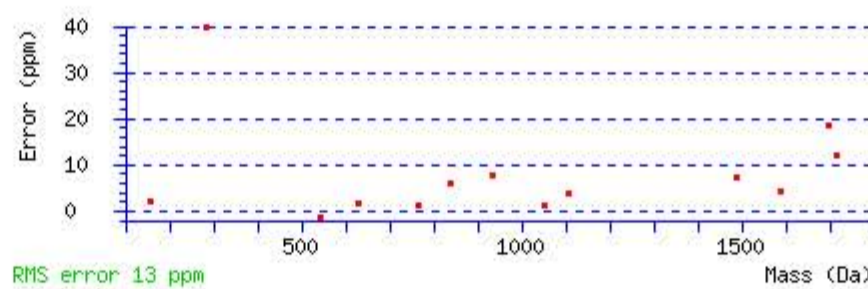

NCBI BLAST search of **GPEVQLVAHSPWLK**

(Parameters: blastp, nr protein database, expect=20000, no filter, PAM30)

Other BLAST [web gateways](#)

All matches to this query

| Score | Mr(calc):   | Delta    | Sequence                       |
|-------|-------------|----------|--------------------------------|
| 59.0  | 1871.012756 | 0.001006 | <a href="#">GPEVQLVAHSPWLK</a> |
| 4.4   | 1870.994781 | 0.018981 | <a href="#">NVNQAKLSEHRHK</a>  |

Mascot: <http://www.matrixscience.com/>

# **MASCOT** Mascot Search Results

## Peptide View

MS/MS Fragmentation of **HLVPGAPFLLQALVR**

Found in **CO4A\_HUMAN**, Complement C4-A OS=Homo sapiens GN=C4A PE=1 SV=2

Match to Query 38193: 1941.148422 from(648.056750,3+) rtinseconds(2881) index(51423)

Title: Locus:1.1.1.3713.8 File:"2013-07-02 CLN FXIII 180 min 3rd F 4.wiff"

Data file C:\Program Files (x86)\Matrix Science\Mascot Daemon\mgf9 FXIII 180 min 3rd\mascot\_daemon\_merge.mgf

Click mouse within plot area to zoom in by factor of two about that point

Or, Plot from  to  Da

Label all possible matches  Label matches used for scoring



Monoisotopic mass of neutral peptide Mr(calc): 1941.138626

Fixed modifications: Carbamidomethyl (C) (apply to specified residues or termini only)

Variable modifications:

Q11 : Biotin:Thermo-21345 (Q)

Ions Score: 34 Expect: 0.00084

Matches : 10/92 fragment ions using 20 most intense peaks [\(help\)](#)

| #  | b                  | b <sup>++</sup> | b <sup>*</sup> | b <sup>*++</sup> | Seq.     | y                  | y <sup>++</sup> | y <sup>*</sup> | y <sup>*++</sup> | #  |
|----|--------------------|-----------------|----------------|------------------|----------|--------------------|-----------------|----------------|------------------|----|
| 1  | 138.066188         | 69.536732       |                |                  | <b>H</b> |                    |                 |                |                  | 15 |
| 2  | <b>251.150252</b>  | 126.078764      |                |                  | <b>L</b> | 1805.086996        | 903.047136      | 1788.060447    | 894.533862       | 14 |
| 3  | 350.218666         | 175.612971      |                |                  | <b>V</b> | 1692.002932        | 846.505104      | 1674.976383    | 837.991830       | 13 |
| 4  | 447.271430         | 224.139353      |                |                  | <b>P</b> | 1592.934518        | 796.970897      | 1575.907969    | 788.457623       | 12 |
| 5  | 504.292894         | 252.650085      |                |                  | <b>G</b> | 1495.881754        | 748.444515      | 1478.855205    | 739.931241       | 11 |
| 6  | <b>575.330008</b>  | 288.168642      |                |                  | <b>A</b> | 1438.860290        | 719.933783      | 1421.833741    | 711.420509       | 10 |
| 7  | 672.382772         | 336.695024      |                |                  | <b>P</b> | 1367.823176        | 684.415226      | 1350.796627    | 675.901952       | 9  |
| 8  | <b>819.451186</b>  | 410.229231      |                |                  | <b>F</b> | 1270.770412        | 635.888844      | 1253.743863    | 627.375570       | 8  |
| 9  | 932.535250         | 466.771263      |                |                  | <b>L</b> | <b>1123.701998</b> | 562.354637      | 1106.675449    | 553.841363       | 7  |
| 10 | 1045.619314        | 523.313295      |                |                  | <b>L</b> | <b>1010.617934</b> | 505.812605      | 993.591385     | 497.299331       | 6  |
| 11 | 1484.844640        | 742.925958      | 1467.818091    | 734.412684       | <b>Q</b> | <b>897.533870</b>  | 449.270573      | 880.507321     | 440.757298       | 5  |
| 12 | <b>1555.881754</b> | 778.444515      | 1538.855205    | 769.931241       | <b>A</b> | <b>458.308544</b>  | 229.657910      | 441.281995     | 221.144635       | 4  |
| 13 | 1668.965818        | 834.986547      | 1651.939269    | 826.473273       | <b>L</b> | 387.271430         | 194.139353      | 370.244881     | 185.626078       | 3  |
| 14 | 1768.034232        | 884.520754      | 1751.007683    | 876.007480       | <b>V</b> | <b>274.187366</b>  | 137.597321      | 257.160817     | 129.084047       | 2  |
| 15 |                    |                 |                |                  | <b>R</b> | <b>175.118952</b>  | 88.063114       | 158.092403     | 79.549839        | 1  |

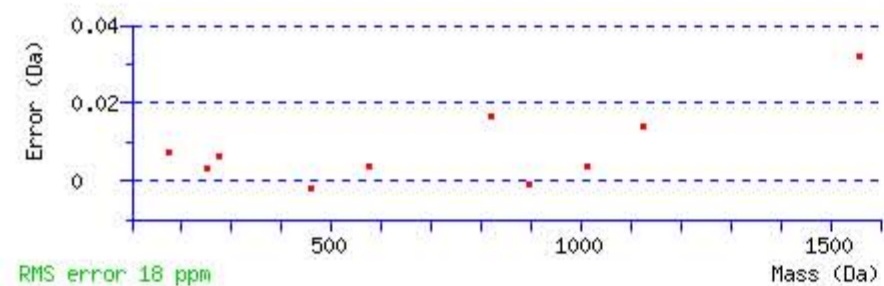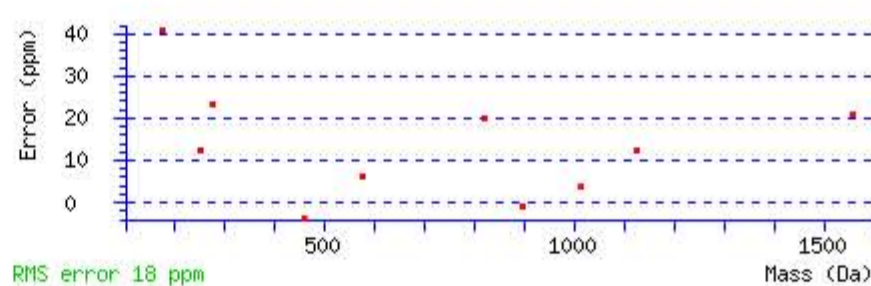

NCBI BLAST search of [HLVPGAPFLLQALVR](#)

(Parameters: blastp, nr protein database, expect=20000, no filter, PAM30)

Other BLAST [web gateways](#)

All matches to this query

| Score | Mr(calc):   | Delta    | Sequence                        |
|-------|-------------|----------|---------------------------------|
| 34.0  | 1941.138626 | 0.009796 | <a href="#">HLVPGAPFLLQALVR</a> |

Mascot: <http://www.matrixscience.com/>

# MASCOT SEARCH RESULTS

## Peptide View

MS/MS Fragmentation of **EPFLSCCQFAESLR**

Found in **CO4A\_HUMAN**, Complement C4-A OS=Homo sapiens GN=C4A PE=1 SV=2

Match to Query 40920: 2053.946352 from(685.656060,3+) rtinseconds(2498) index(48782)

Title: Locus:1.1.1.3582.13 File:"2013-07-02 CLN FXIII 180 min 3rd F 4.wiff"

Data file C:\Program Files (x86)\Matrix Science\Mascot Daemon\mgf\9 FXIII 180 min 3rd\mascot\_daemon\_merge.mgf

Click mouse within plot area to zoom in by factor of two about that point

Or, Plot from  to  Da

Label all possible matches  Label matches used for scoring



Monoisotopic mass of neutral peptide Mr(calc): 2053.942368

Fixed modifications: Carbamidomethyl (C) (apply to specified residues or termini only)

Variable modifications:

Q8 : Biotin:Thermo-21345 (Q)

Ions Score: 65 Expect: 1.4e-006

Matches : 24/138 fragment ions using 42 most intense peaks [\(help\)](#)

| #  | b                  | b <sup>++</sup> | b <sup>+</sup> | b <sup>+++</sup> | b <sup>0</sup>     | b <sup>0++</sup> | Seq. | y                  | y <sup>++</sup>   | y <sup>+</sup> | y <sup>+++</sup> | y <sup>0</sup>     | y <sup>0++</sup> | #  |
|----|--------------------|-----------------|----------------|------------------|--------------------|------------------|------|--------------------|-------------------|----------------|------------------|--------------------|------------------|----|
| 1  | 130.049869         | 65.528572       |                |                  | 112.039304         | 56.523290        | E    |                    |                   |                |                  |                    |                  | 14 |
| 2  | <b>227.102633</b>  | 114.054954      |                |                  | 209.092068         | 105.049672       | P    | 1925.907059        | 963.457168        | 1908.880510    | 954.943893       | 1907.896494        | 954.451885       | 13 |
| 3  | 374.171047         | 187.589161      |                |                  | 356.160482         | 178.583879       | F    | 1828.854295        | <b>914.930786</b> | 1811.827746    | 906.417511       | 1810.843730        | 905.925503       | 12 |
| 4  | 487.255111         | 244.131193      |                |                  | <b>469.244546</b>  | 235.125911       | L    | <b>1681.785881</b> | 841.396579        | 1664.759332    | 832.883304       | 1663.775316        | 832.391296       | 11 |
| 5  | 574.287139         | 287.647208      |                |                  | <b>556.276574</b>  | 278.641925       | S    | <b>1568.701817</b> | <b>784.854547</b> | 1551.675268    | 776.341272       | <b>1550.691252</b> | 775.849264       | 10 |
| 6  | 734.317788         | 367.662532      |                |                  | 716.307223         | 358.657250       | C    | <b>1481.669789</b> | <b>741.338533</b> | 1464.643240    | 732.825258       | 1463.659224        | 732.333250       | 9  |
| 7  | <b>894.348437</b>  | 447.677857      |                |                  | 876.337872         | 438.672574       | C    | <b>1321.639140</b> | 661.323208        | 1304.612591    | 652.809934       | <b>1303.628575</b> | 652.317926       | 8  |
| 8  | <b>1333.573763</b> | 667.290520      | 1316.547214    | 658.777245       | 1315.563198        | 658.285237       | Q    | <b>1161.608491</b> | 581.307884        | 1144.581942    | 572.794609       | 1143.597926        | 572.302601       | 7  |
| 9  | 1480.642177        | 740.824727      | 1463.615628    | 732.311452       | <b>1462.631612</b> | 731.819444       | F    | <b>722.383165</b>  | 361.695221        | 705.356616     | 353.181946       | <b>704.372600</b>  | 352.689938       | 6  |
| 10 | 1551.679291        | 776.343284      | 1534.652742    | 767.830009       | 1533.668726        | 767.338001       | A    | <b>575.314751</b>  | <b>288.161014</b> | 558.288202     | 279.647739       | 557.304186         | 279.155731       | 5  |
| 11 | 1680.721884        | 840.864580      | 1663.695335    | 832.351306       | 1662.711319        | 831.859298       | E    | <b>504.277637</b>  | 252.642457        | 487.251088     | 244.129182       | 486.267072         | 243.637174       | 4  |
| 12 | 1767.753912        | 884.380594      | 1750.727363    | 875.867320       | 1749.743347        | 875.375312       | S    | <b>375.235044</b>  | 188.121160        | 358.208495     | 179.607885       | 357.224479         | 179.115877       | 3  |
| 13 | 1880.837976        | 940.922626      | 1863.811427    | 932.409352       | 1862.827411        | 931.917344       | L    | <b>288.203016</b>  | 144.605146        | 271.176467     | 136.091871       |                    |                  | 2  |
| 14 |                    |                 |                |                  |                    |                  | R    | <b>175.118952</b>  | 88.063114         | 158.092403     | 79.549839        |                    |                  | 1  |



NCBI BLAST search of **EPFLSCCQFAESLR**

(Parameters: blastp, nr protein database, expect=20000, no filter, PAM30)

Other BLAST [web gateways](#)

All matches to this query

| Score | Mr(calc):   | Delta     | Sequence                           |
|-------|-------------|-----------|------------------------------------|
| 65.3  | 2053.942368 | 0.003984  | <a href="#">EPFLSCCQFAESLR</a>     |
| 3.1   | 2053.948227 | -0.001875 | <a href="#">EKSTCSMGSELLPMISPR</a> |

Mascot: <http://www.matrixscience.com/>

# MASCOT Search Results

## Peptide View

MS/MS Fragmentation of **LLATLCSAEVCQCAEGK**

Found in **CO4A\_HUMAN**, Complement C4-A OS=Homo sapiens GN=C4A PE=1 SV=2

Match to Query 43621: 2220.038922 from(741.020250,3+) rtinseconds(2229) index(47386)

Title: Locus:1.1.1.3488.20 File:"2013-07-02 CLN FXIII 180 min 3rd F 4.wiff"

Data file C:\Program Files (x86)\Matrix Science\Mascot Daemon\mgf9 FXIII 180 min 3rd\mascot\_daemon\_merge.mgf

Click mouse within plot area to zoom in by factor of two about that point

Or, Plot from  to  Da

Label all possible matches  Label matches used for scoring

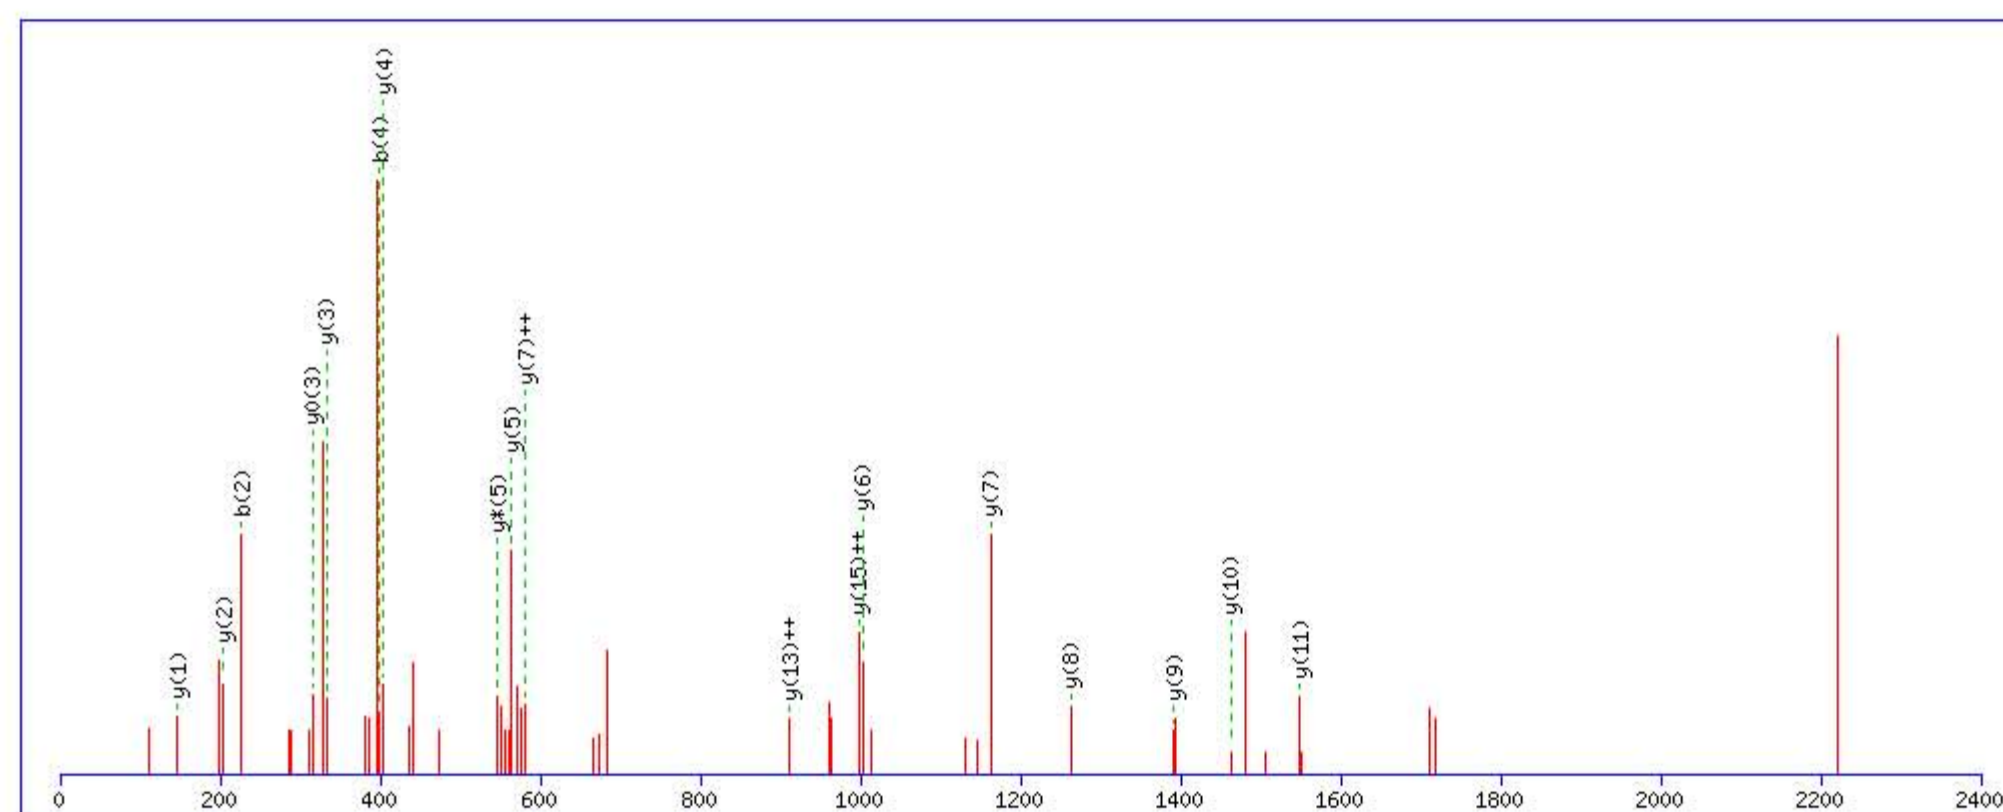

Monoisotopic mass of neutral peptide  $M_r(\text{calc})$ : 2220.041092

Fixed modifications: Carbamidomethyl (C) (apply to specified residues or termini only)

Variable modifications:

Q12 : Biotin:Thermo-21345 (Q)

Ions Score: 50 Expect: 0.00017

Matches : 18/160 fragment ions using 45 most intense peaks [\(help\)](#)

| #  | b                 | b <sup>++</sup> | b <sup>*</sup> | b <sup>*++</sup> | b <sup>0</sup> | b <sup>0++</sup> | Seq. | y                  | y <sup>++</sup>   | y <sup>*</sup>    | y <sup>*++</sup> | y <sup>0</sup>    | y <sup>0++</sup> | #  |
|----|-------------------|-----------------|----------------|------------------|----------------|------------------|------|--------------------|-------------------|-------------------|------------------|-------------------|------------------|----|
| 1  | 114.091340        | 57.549308       |                |                  |                |                  | L    |                    |                   |                   |                  |                   |                  | 17 |
| 2  | <b>227.175404</b> | 114.091340      |                |                  |                |                  | L    | 2107.964318        | 1054.485797       | 2090.937769       | 1045.972522      | 2089.953753       | 1045.480514      | 16 |
| 3  | 298.212518        | 149.609897      |                |                  |                |                  | A    | 1994.880254        | <b>997.943765</b> | 1977.853705       | 989.430491       | 1976.869689       | 988.938483       | 15 |
| 4  | <b>399.260197</b> | 200.133737      |                |                  | 381.249632     | 191.128454       | T    | 1923.843140        | 962.425208        | 1906.816591       | 953.911934       | 1905.832575       | 953.419926       | 14 |
| 5  | 512.344261        | 256.675769      |                |                  | 494.333696     | 247.670486       | L    | 1822.795461        | <b>911.901369</b> | 1805.768912       | 903.388094       | 1804.784896       | 902.896086       | 13 |
| 6  | 672.374910        | 336.691093      |                |                  | 654.364345     | 327.685811       | C    | 1709.711397        | 855.359337        | 1692.684848       | 846.846062       | 1691.700832       | 846.354054       | 12 |
| 7  | 759.406938        | 380.207107      |                |                  | 741.396373     | 371.201825       | S    | <b>1549.680748</b> | 775.344012        | 1532.654199       | 766.830738       | 1531.670183       | 766.338730       | 11 |
| 8  | 830.444052        | 415.725664      |                |                  | 812.433487     | 406.720382       | A    | <b>1462.648720</b> | 731.827998        | 1445.622171       | 723.314724       | 1444.638155       | 722.822716       | 10 |
| 9  | 959.486645        | 480.246961      |                |                  | 941.476080     | 471.241678       | E    | <b>1391.611606</b> | 696.309441        | 1374.585057       | 687.796167       | 1373.601041       | 687.304159       | 9  |
| 10 | 1058.555059       | 529.781168      |                |                  | 1040.544494    | 520.775885       | V    | <b>1262.569013</b> | 631.788145        | 1245.542464       | 623.274870       | 1244.558448       | 622.782862       | 8  |
| 11 | 1218.585708       | 609.796492      |                |                  | 1200.575143    | 600.791210       | C    | <b>1163.500599</b> | <b>582.253938</b> | 1146.474050       | 573.740663       | 1145.490034       | 573.248655       | 7  |
| 12 | 1657.811034       | 829.409155      | 1640.784485    | 820.895881       | 1639.800469    | 820.403873       | Q    | <b>1003.469950</b> | 502.238613        | 986.443401        | 493.725339       | 985.459385        | 493.233331       | 6  |
| 13 | 1817.841683       | 909.424480      | 1800.815134    | 900.911205       | 1799.831118    | 900.419197       | C    | <b>564.244624</b>  | 282.625950        | <b>547.218075</b> | 274.112676       | 546.234059        | 273.620668       | 5  |
| 14 | 1888.878797       | 944.943037      | 1871.852248    | 936.429762       | 1870.868232    | 935.937754       | A    | <b>404.213975</b>  | 202.610626        | 387.187426        | 194.097351       | 386.203410        | 193.605343       | 4  |
| 15 | 2017.921390       | 1009.464333     | 2000.894841    | 1000.951059      | 1999.910825    | 1000.459051      | E    | <b>333.176861</b>  | 167.092069        | 316.150312        | 158.578794       | <b>315.166296</b> | 158.086786       | 3  |
| 16 | 2074.942854       | 1037.975065     | 2057.916305    | 1029.461790      | 2056.932289    | 1028.969782      | G    | <b>204.134268</b>  | 102.570772        | 187.107719        | 94.057497        |                   |                  | 2  |
| 17 |                   |                 |                |                  |                |                  | K    | <b>147.112804</b>  | 74.060040         | 130.086255        | 65.546765        |                   |                  | 1  |



NCBI BLAST search of [LLATLCSAEVCQCAEGK](#)

(Parameters: blastp, nr protein database, expect=20000, no filter, PAM30)

Other BLAST [web gateways](#)

All matches to this query

| Score | $M_r(\text{calc})$ : | Delta     | Sequence                          |
|-------|----------------------|-----------|-----------------------------------|
| 49.7  | 2220.041092          | -0.002170 | <a href="#">LLATLCSAEVCQCAEGK</a> |

Mascot: <http://www.matrixscience.com/>

# Mascot Search Results

## Peptide View

MS/MS Fragmentation of **GCGEQTMIIYLAPTLAASR**

Found in **CO4A\_HUMAN**, Complement C4-A OS=Homo sapiens GN=C4A PE=1 SV=2

Match to Query 44062: 2249.109492 from(750.710440,3+) rtinseconds(2515) index(48930)

Title: Locus:1.1.1.3588.11 File:"2013-07-02 CLN FXIII 180 min 3rd F 4.wiff"

Data file C:\Program Files (x86)\Matrix Science\Mascot Daemon\mgf9 FXIII 180 min 3rd\mascot\_daemon\_merge.mgf

Click mouse within plot area to zoom in by factor of two about that point

Or, Plot from  to  Da

Label all possible matches  Label matches used for scoring

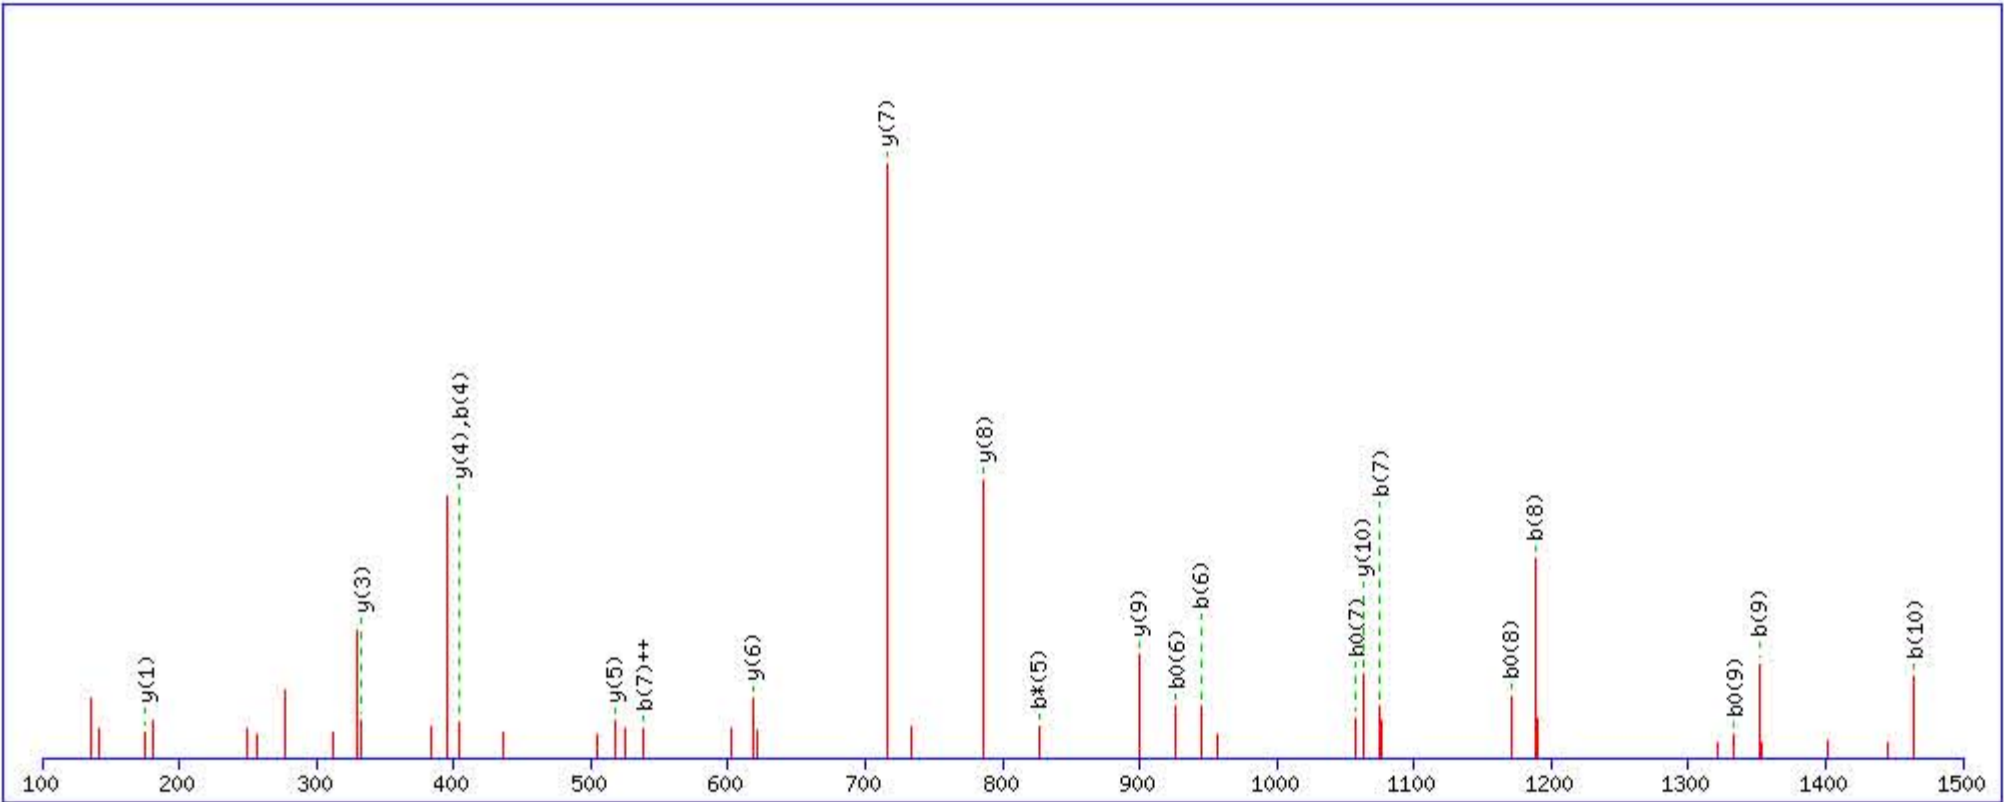

Monoisotopic mass of neutral peptide Mr(calc): 2249.100647

Fixed modifications: Carbamidomethyl (C) (apply to specified residues or termini only)

Variable modifications:

Q5 : Biotin:Thermo-21345 (Q)

Ions Score: 38 Expect: 0.0011

Matches : 21/188 fragment ions using 45 most intense peaks [\(help\)](#)

| #  | b                  | b <sup>++</sup>   | b <sup>*</sup>    | b <sup>*++</sup> | b <sup>0</sup>     | b <sup>0++</sup> | Seq.     | y                  | y <sup>++</sup> | y <sup>*</sup> | y <sup>*++</sup> | y <sup>0</sup> | y <sup>0++</sup> | #         |
|----|--------------------|-------------------|-------------------|------------------|--------------------|------------------|----------|--------------------|-----------------|----------------|------------------|----------------|------------------|-----------|
| 1  | 58.028740          | 29.518008         |                   |                  |                    |                  | <b>G</b> |                    |                 |                |                  |                |                  | <b>18</b> |
| 2  | 218.059389         | 109.533333        |                   |                  |                    |                  | <b>C</b> | 2193.086482        | 1097.046879     | 2176.059933    | 1088.533604      | 2175.075917    | 1088.041596      | <b>17</b> |
| 3  | 275.080853         | 138.044064        |                   |                  |                    |                  | <b>G</b> | 2033.055833        | 1017.031555     | 2016.029284    | 1008.518280      | 2015.045268    | 1008.026272      | <b>16</b> |
| 4  | <b>404.123446</b>  | 202.565361        |                   |                  | 386.112881         | 193.560079       | <b>E</b> | 1976.034369        | 988.520822      | 1959.007820    | 980.007548       | 1958.023804    | 979.515540       | <b>15</b> |
| 5  | 843.348772         | 422.178024        | <b>826.322223</b> | 413.664750       | 825.338207         | 413.172742       | <b>Q</b> | 1846.991776        | 923.999526      | 1829.965227    | 915.486251       | 1828.981211    | 914.994243       | <b>14</b> |
| 6  | <b>944.396451</b>  | 472.701864        | 927.369902        | 464.188589       | <b>926.385886</b>  | 463.696581       | <b>T</b> | 1407.766450        | 704.386863      | 1390.739901    | 695.873588       | 1389.755885    | 695.381580       | <b>13</b> |
| 7  | <b>1075.436936</b> | <b>538.222106</b> | 1058.410387       | 529.708832       | <b>1057.426371</b> | 529.216824       | <b>M</b> | 1306.718771        | 653.863023      | 1289.692222    | 645.349749       | 1288.708206    | 644.857741       | <b>12</b> |
| 8  | <b>1188.521000</b> | 594.764138        | 1171.494451       | 586.250864       | <b>1170.510435</b> | 585.758855       | <b>I</b> | 1175.678286        | 588.342781      | 1158.651737    | 579.829506       | 1157.667721    | 579.337498       | <b>11</b> |
| 9  | <b>1351.584329</b> | 676.295803        | 1334.557780       | 667.782528       | <b>1333.573764</b> | 667.290520       | <b>Y</b> | <b>1062.594222</b> | 531.800749      | 1045.567673    | 523.287475       | 1044.583657    | 522.795466       | <b>10</b> |
| 10 | <b>1464.668393</b> | 732.837834        | 1447.641844       | 724.324560       | 1446.657828        | 723.832552       | <b>L</b> | <b>899.530893</b>  | 450.269084      | 882.504344     | 441.755810       | 881.520328     | 441.263802       | <b>9</b>  |
| 11 | 1535.705507        | 768.356391        | 1518.678958       | 759.843117       | 1517.694942        | 759.351109       | <b>A</b> | <b>786.446829</b>  | 393.727053      | 769.420280     | 385.213778       | 768.436264     | 384.721770       | <b>8</b>  |
| 12 | 1632.758271        | 816.882773        | 1615.731722       | 808.369499       | 1614.747706        | 807.877491       | <b>P</b> | <b>715.409715</b>  | 358.208496      | 698.383166     | 349.695221       | 697.399150     | 349.203213       | <b>7</b>  |
| 13 | 1733.805950        | 867.406613        | 1716.779401       | 858.893339       | 1715.795385        | 858.401330       | <b>T</b> | <b>618.356951</b>  | 309.682114      | 601.330402     | 301.168839       | 600.346386     | 300.676831       | <b>6</b>  |
| 14 | 1846.890014        | 923.948645        | 1829.863465       | 915.435370       | 1828.879449        | 914.943362       | <b>L</b> | <b>517.309272</b>  | 259.158274      | 500.282723     | 250.644999       | 499.298707     | 250.152991       | <b>5</b>  |
| 15 | 1917.927128        | 959.467202        | 1900.900579       | 950.953927       | 1899.916563        | 950.461919       | <b>A</b> | <b>404.225208</b>  | 202.616242      | 387.198659     | 194.102967       | 386.214643     | 193.610959       | <b>4</b>  |
| 16 | 1988.964242        | 994.985759        | 1971.937693       | 986.472484       | 1970.953677        | 985.980476       | <b>A</b> | <b>333.188094</b>  | 167.097685      | 316.161545     | 158.584410       | 315.177529     | 158.092402       | <b>3</b>  |
| 17 | 2075.996270        | 1038.501773       | 2058.969721       | 1029.988498      | 2057.985705        | 1029.496490      | <b>S</b> | 262.150980         | 131.579128      | 245.124431     | 123.065854       | 244.140415     | 122.573846       | <b>2</b>  |
| 18 |                    |                   |                   |                  |                    |                  | <b>R</b> | <b>175.118952</b>  | 88.063114       | 158.092403     | 79.549839        |                |                  | <b>1</b>  |

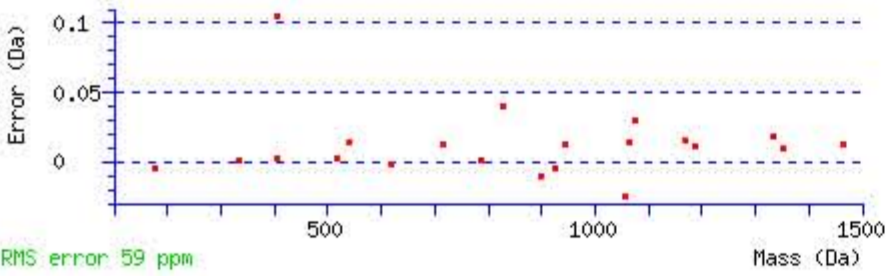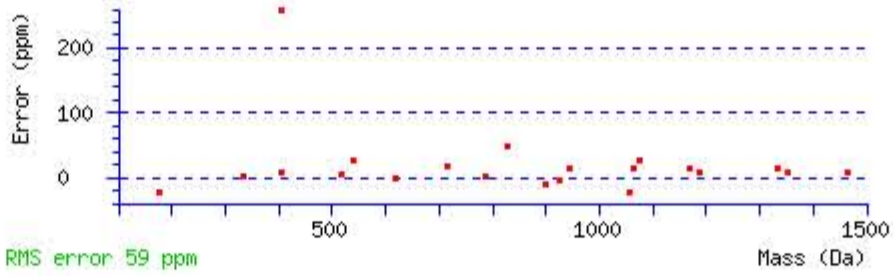

NCBI BLAST search of **GCGEQTMIIYLAPTLAASR**

(Parameters: blastp, nr protein database, expect=20000, no filter, PAM30)

Other BLAST [web gateways](#)

All matches to this query

| Score | Mr(calc):   | Delta     | Sequence                              |
|-------|-------------|-----------|---------------------------------------|
| 37.9  | 2249.100647 | 0.008845  | <a href="#">GCGEQTMIIYLAPTLAASR</a>   |
| 6.2   | 2249.115051 | -0.005559 | <a href="#">YSTSLYASPSMVHEGVAVVPR</a> |
| 3.2   | 2249.137527 | -0.028035 | <a href="#">QKFERPICVSWSTDVKGGR</a>   |
| 1.9   | 2249.096420 | 0.013072  | <a href="#">SDNTVTWLAAWTESVQNSIK</a>  |
| 0.3   | 2249.078659 | 0.030833  | <a href="#">FENGVAEGMVDPISAFR</a>     |

# Mascot Search Results

## Peptide View

MS/MS Fragmentation of **DDPDAPLQPVTPLQLFEGR**  
 Found in **CO4A\_HUMAN**, Complement C4-A OS=Homo sapiens GN=C4A PE=1 SV=2

Match to Query 46770: 2418.237822 from(807.086550,3+) rtinseconds(3010) index(52389)  
 Title: Locus:1.1.1.3756.16 File:"2013-07-02 CLN FXIII 180 min 3rd F 4.wiff"  
 Data file C:\Program Files (x86)\Matrix Science\Mascot Daemon\mgf9 FXIII 180 min 3rd\mascot\_daemon\_merge.mgf

Click mouse within plot area to zoom in by factor of two about that point  
 Or, Plot from  to  Da   
 Label all possible matches  Label matches used for scoring

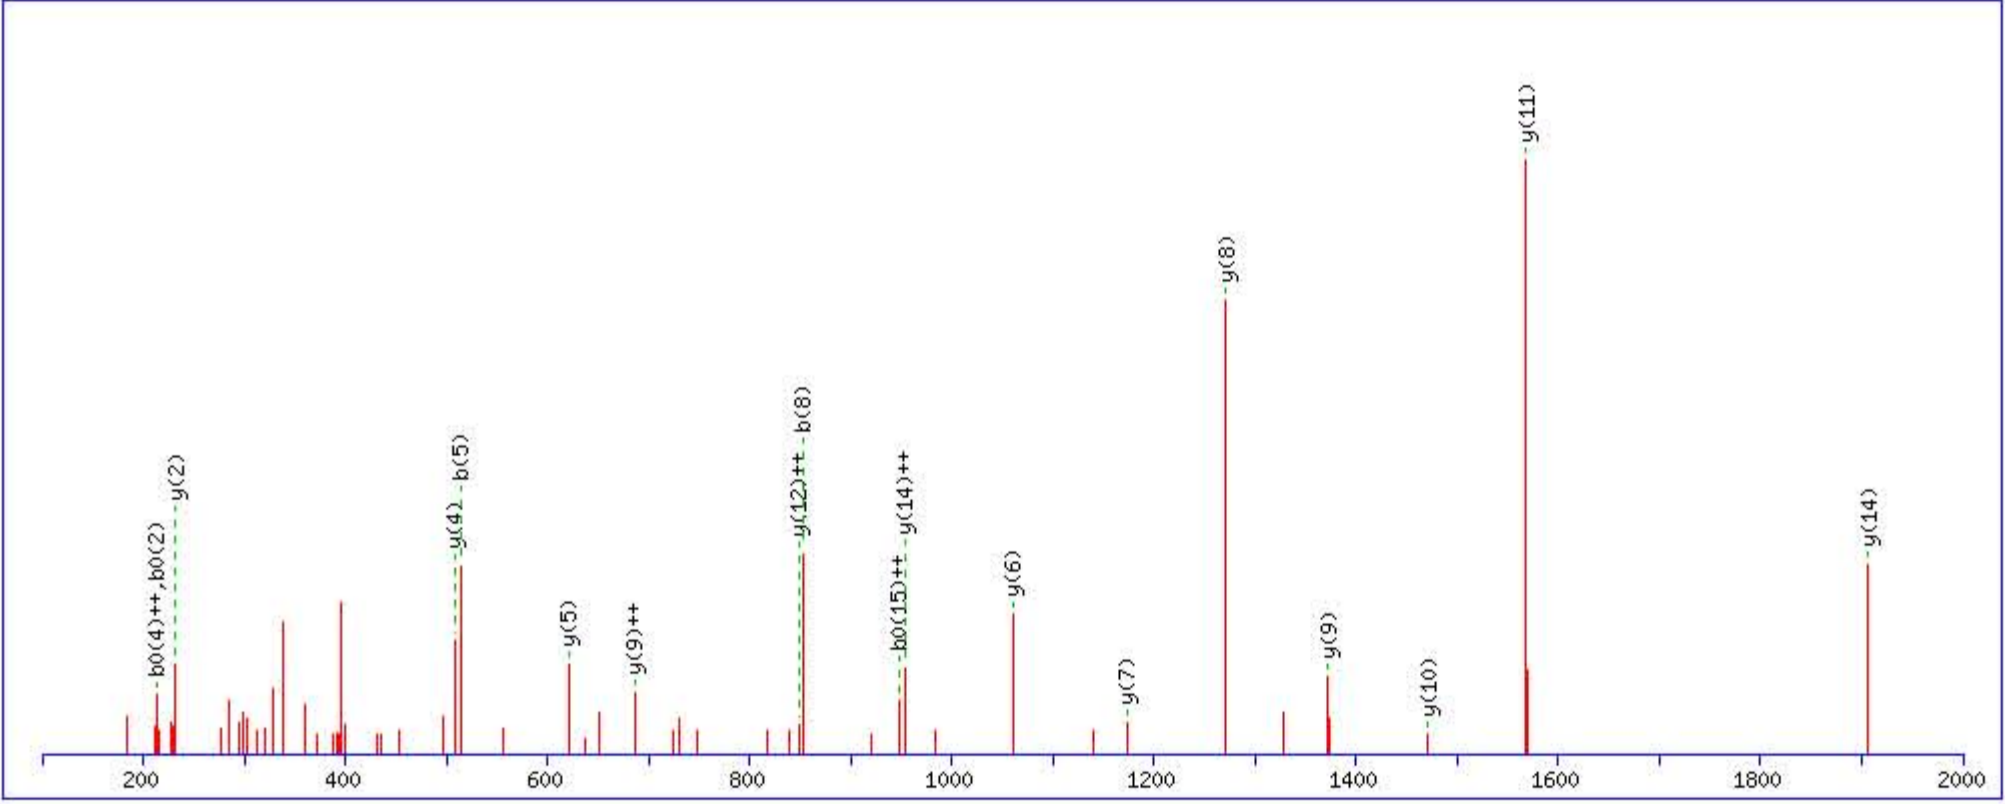

Monoisotopic mass of neutral peptide Mr(calc): 2418.225342  
 Fixed modifications: Carbamidomethyl (C) (apply to specified residues or termini only)  
 Variable modifications:  
 Q14 : Biotin:Thermo-21345 (Q)  
 Ions Score: 66 Expect: 8.1e-007  
 Matches : 18/198 fragment ions using 27 most intense peaks [\(help\)](#)

| #  | b           | b <sup>++</sup> | b <sup>*</sup> | b <sup>*++</sup> | b <sup>0</sup> | b <sup>0++</sup> | Seq. | y           | y <sup>++</sup> | y <sup>*</sup> | y <sup>*++</sup> | y <sup>0</sup> | y <sup>0++</sup> | #  |
|----|-------------|-----------------|----------------|------------------|----------------|------------------|------|-------------|-----------------|----------------|------------------|----------------|------------------|----|
| 1  | 116.034219  | 58.520748       |                |                  | 98.023654      | 49.515465        | D    |             |                 |                |                  |                |                  | 19 |
| 2  | 231.061162  | 116.034219      |                |                  | 213.050597     | 107.028936       | D    | 2304.205668 | 1152.606472     | 2287.179119    | 1144.093197      | 2286.195103    | 1143.601189      | 18 |
| 3  | 328.113926  | 164.560601      |                |                  | 310.103361     | 155.555319       | P    | 2189.178725 | 1095.093000     | 2172.152176    | 1086.579726      | 2171.168160    | 1086.087718      | 17 |
| 4  | 443.140869  | 222.074073      |                |                  | 425.130304     | 213.068790       | D    | 2092.125961 | 1046.566618     | 2075.099412    | 1038.053344      | 2074.115396    | 1037.561336      | 16 |
| 5  | 514.177983  | 257.592630      |                |                  | 496.167418     | 248.587347       | A    | 1977.099018 | 989.053147      | 1960.072469    | 980.539873       | 1959.088453    | 980.047865       | 15 |
| 6  | 611.230747  | 306.119012      |                |                  | 593.220182     | 297.113729       | P    | 1906.061904 | 953.534590      | 1889.035355    | 945.021316       | 1888.051339    | 944.529308       | 14 |
| 7  | 724.314811  | 362.661044      |                |                  | 706.304246     | 353.655761       | L    | 1809.009140 | 905.008208      | 1791.982591    | 896.494934       | 1790.998575    | 896.002926       | 13 |
| 8  | 852.373389  | 426.690333      | 835.346840     | 418.177058       | 834.362824     | 417.685050       | Q    | 1695.925076 | 848.466176      | 1678.898527    | 839.952902       | 1677.914511    | 839.460894       | 12 |
| 9  | 949.426153  | 475.216715      | 932.399604     | 466.703440       | 931.415588     | 466.211432       | P    | 1567.866498 | 784.436887      | 1550.839949    | 775.923613       | 1549.855933    | 775.431605       | 11 |
| 10 | 1048.494567 | 524.750922      | 1031.468018    | 516.237647       | 1030.484002    | 515.745639       | V    | 1470.813734 | 735.910505      | 1453.787185    | 727.397231       | 1452.803169    | 726.905223       | 10 |
| 11 | 1149.542246 | 575.274761      | 1132.515697    | 566.761487       | 1131.531681    | 566.269479       | T    | 1371.745320 | 686.376298      | 1354.718771    | 677.863024       | 1353.734755    | 677.371016       | 9  |
| 12 | 1246.595010 | 623.801143      | 1229.568461    | 615.287869       | 1228.584445    | 614.795861       | P    | 1270.697641 | 635.852459      | 1253.671092    | 627.339184       | 1252.687076    | 626.847176       | 8  |
| 13 | 1359.679074 | 680.343175      | 1342.652525    | 671.829901       | 1341.668509    | 671.337893       | L    | 1173.644877 | 587.326077      | 1156.618328    | 578.812802       | 1155.634312    | 578.320794       | 7  |
| 14 | 1798.904400 | 899.955838      | 1781.877851    | 891.442564       | 1780.893835    | 890.950556       | Q    | 1060.560813 | 530.784045      | 1043.534264    | 522.270770       | 1042.550248    | 521.778762       | 6  |
| 15 | 1911.988464 | 956.497870      | 1894.961915    | 947.984596       | 1893.977899    | 947.492588       | L    | 621.335487  | 311.171382      | 604.308938     | 302.658107       | 603.324922     | 302.166099       | 5  |
| 16 | 2059.056878 | 1030.032077     | 2042.030329    | 1021.518803      | 2041.046313    | 1021.026794      | F    | 508.251423  | 254.629350      | 491.224874     | 246.116075       | 490.240858     | 245.624067       | 4  |
| 17 | 2188.099471 | 1094.553373     | 2171.072922    | 1086.040099      | 2170.088906    | 1085.548091      | E    | 361.183009  | 181.095142      | 344.156460     | 172.581868       | 343.172444     | 172.089860       | 3  |
| 18 | 2245.120935 | 1123.064105     | 2228.094386    | 1114.550831      | 2227.110370    | 1114.058823      | G    | 232.140416  | 116.573846      | 215.113867     | 108.060571       |                |                  | 2  |
| 19 |             |                 |                |                  |                |                  | R    | 175.118952  | 88.063114       | 158.092403     | 79.549839        |                |                  | 1  |

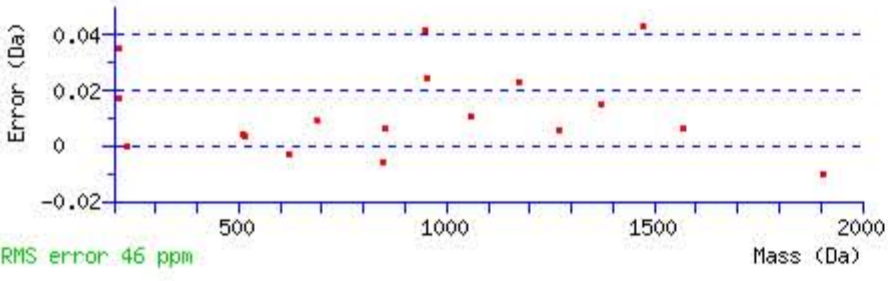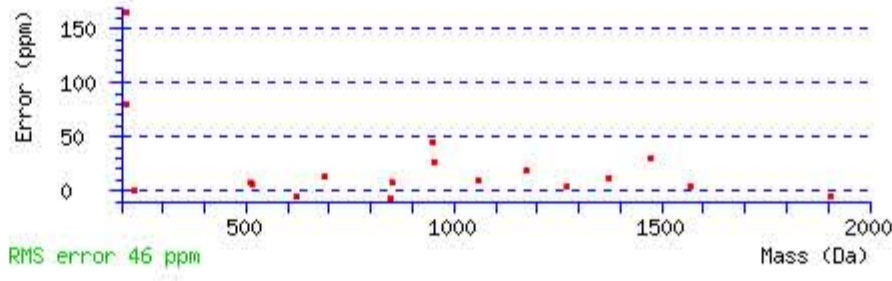

NCBI BLAST search of [DDPDAPLQPVTPLQLFEGR](#)  
 (Parameters: blastp, nr protein database, expect=20000, no filter, PAM30)  
 Other BLAST [web gateways](#)

## All matches to this query

| Score | Mr(calc):   | Delta     | Sequence                             |
|-------|-------------|-----------|--------------------------------------|
| 65.7  | 2418.225342 | 0.012480  | <a href="#">DDPDAPLQPVTPLQLFEGR</a>  |
| 12.7  | 2418.225342 | 0.012480  | <a href="#">DDPDAPLQPVTPLQLFEGR</a>  |
| 0.7   | 2418.247803 | -0.009981 | <a href="#">GQTLNVNRLHIVGYGDFQMK</a> |
| 0.2   | 2418.259033 | -0.021211 | <a href="#">QQQRALLGPWLSGPQGTD</a>   |
| 0.2   | 2418.259033 | -0.021211 | <a href="#">QQQRALLGPWLSGPQGTD</a>   |
| 0.2   | 2418.259033 | -0.021211 | <a href="#">QQQRALLGPWLSGPQGTD</a>   |

# Mascot Search Results

## Peptide View

MS/MS Fragmentation of **AACAQLNDFLQEYGTQGCQV**  
 Found in **CO4A\_HUMAN**, Complement C4-A OS=Homo sapiens GN=C4A PE=1 SV=2

Match to Query 49357: 2583.165192 from(862.062340,3+) rtinseconds(2731) index(50237)  
 Title: Locus:1.1.1.3662.11 File:"2013-07-02 CLN FXIII 180 min 3rd F 4.wiff"  
 Data file C:\Program Files (x86)\Matrix Science\Mascot Daemon\mgf9 FXIII 180 min 3rd\mascot\_daemon\_merge.mgf

Click mouse within plot area to zoom in by factor of two about that point  
 Or, Plot from 0 to 2400 Da Full range  
 Label all possible matches  Label matches used for scoring



Monoisotopic mass of neutral peptide Mr(calc): 2583.155624  
 Fixed modifications: Carbamidomethyl (C) (apply to specified residues or termini only)  
 Variable modifications:  
 Q5 : Biotin:Thermo-21345 (Q)  
 Ions Score: 65 Expect: 3e-006  
 Matches : 32/194 fragment ions using 52 most intense peaks ([help](#))

| #  | b                  | b <sup>++</sup>    | b <sup>*</sup>     | b <sup>+++</sup> | b <sup>0</sup>     | b <sup>0++</sup> | Seq. | y                  | y <sup>++</sup> | y <sup>*</sup>     | y <sup>+++</sup> | y <sup>0</sup>     | y <sup>0++</sup> | #  |
|----|--------------------|--------------------|--------------------|------------------|--------------------|------------------|------|--------------------|-----------------|--------------------|------------------|--------------------|------------------|----|
| 1  | 72.044390          | 36.525833          |                    |                  |                    |                  | A    |                    |                 |                    |                  |                    |                  | 20 |
| 2  | 143.081504         | 72.044390          |                    |                  |                    |                  | A    | 2513.125782        | 1257.066529     | 2496.099233        | 1248.553254      | 2495.115217        | 1248.061246      | 19 |
| 3  | 303.112153         | 152.059714         |                    |                  |                    |                  | C    | 2442.088668        | 1221.547972     | 2425.062119        | 1213.034697      | 2424.078103        | 1212.542689      | 18 |
| 4  | 374.149267         | 187.578271         |                    |                  |                    |                  | A    | 2282.058019        | 1141.532647     | 2265.031470        | 1133.019373      | 2264.047454        | 1132.527365      | 17 |
| 5  | <b>813.374593</b>  | 407.190935         | 796.348044         | 398.677660       |                    |                  | Q    | 2211.020905        | 1106.014090     | 2193.994356        | 1097.500816      | 2193.010340        | 1097.008808      | 16 |
| 6  | <b>926.458657</b>  | 463.732967         | 909.432108         | 455.219692       |                    |                  | L    | 1771.795579        | 886.401428      | 1754.769030        | 877.888153       | 1753.785014        | 877.396145       | 15 |
| 7  | <b>1040.501584</b> | 520.754430         | 1023.475035        | 512.241155       |                    |                  | N    | 1658.711515        | 829.859396      | 1641.684966        | 821.346121       | 1640.700950        | 820.854113       | 14 |
| 8  | <b>1155.528527</b> | 578.267902         | 1138.501978        | 569.754627       | 1137.517962        | 569.262619       | D    | <b>1544.668588</b> | 772.837932      | 1527.642039        | 764.324658       | <b>1526.658023</b> | 763.832650       | 13 |
| 9  | <b>1302.596941</b> | 651.802109         | <b>1285.570392</b> | 643.288834       | 1284.586376        | 642.796826       | F    | 1429.641645        | 715.324460      | 1412.615096        | 706.811186       | 1411.631080        | 706.319178       | 12 |
| 10 | <b>1415.681005</b> | 708.344141         | <b>1398.654456</b> | 699.830866       | 1397.670440        | 699.338858       | L    | 1282.573231        | 641.790253      | 1265.546682        | 633.276979       | 1264.562666        | 632.784971       | 11 |
| 11 | <b>1543.739583</b> | <b>772.373430</b>  | <b>1526.713034</b> | 763.860155       | 1525.729018        | 763.368147       | Q    | <b>1169.489167</b> | 585.248222      | <b>1152.462618</b> | 576.734947       | 1151.478602        | 576.242939       | 10 |
| 12 | <b>1672.782176</b> | <b>836.894726</b>  | 1655.755627        | 828.381452       | <b>1654.771611</b> | 827.889444       | E    | <b>1041.430589</b> | 521.218932      | 1024.404040        | 512.705658       | 1023.420024        | 512.213650       | 9  |
| 13 | <b>1835.845505</b> | <b>918.426391</b>  | 1818.818956        | 909.913116       | 1817.834940        | 909.421108       | Y    | <b>912.387996</b>  | 456.697636      | 895.361447         | 448.184361       | <b>894.377431</b>  | 447.692353       | 8  |
| 14 | 1892.866969        | 946.937123         | 1875.840420        | 938.423848       | 1874.856404        | 937.931840       | G    | <b>749.324667</b>  | 375.165971      | 732.298118         | 366.652697       | 731.314102         | 366.160689       | 7  |
| 15 | 1993.914648        | 997.460962         | 1976.888099        | 988.947688       | 1975.904083        | 988.455680       | T    | <b>692.303203</b>  | 346.655239      | 675.276654         | 338.141965       | 674.292638         | 337.649957       | 6  |
| 16 | 2121.973226        | 1061.490251        | 2104.946677        | 1052.976976      | 2103.962661        | 1052.484968      | Q    | <b>591.255524</b>  | 296.131400      | 574.228975         | 287.618125       |                    |                  | 5  |
| 17 | 2178.994690        | <b>1090.000983</b> | 2161.968141        | 1081.487708      | 2160.984125        | 1080.995700      | G    | <b>463.196946</b>  | 232.102111      | 446.170397         | 223.588836       |                    |                  | 4  |
| 18 | 2339.025339        | 1170.016307        | 2321.998790        | 1161.503033      | 2321.014774        | 1161.011025      | C    | <b>406.175482</b>  | 203.591379      | <b>389.148933</b>  | 195.078104       |                    |                  | 3  |
| 19 | 2467.083917        | 1234.045596        | 2450.057368        | 1225.532322      | 2449.073352        | 1225.040314      | Q    | <b>246.144833</b>  | 123.576054      | <b>229.118284</b>  | 115.062780       |                    |                  | 2  |
| 20 |                    |                    |                    |                  |                    |                  | V    | 118.086255         | 59.546765       |                    |                  |                    |                  | 1  |

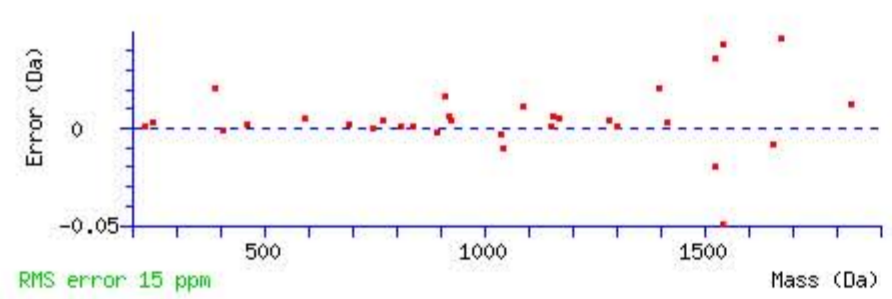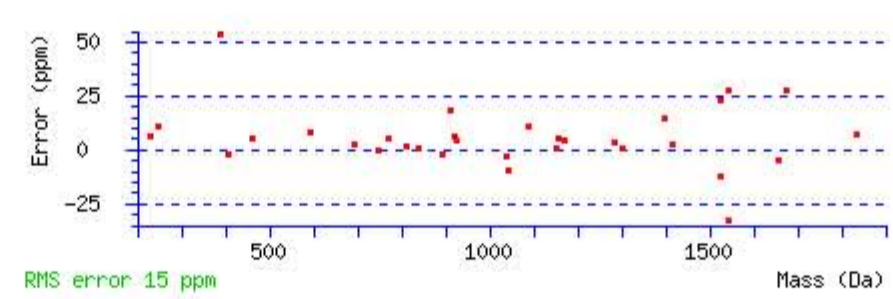

NCBI BLAST search of **AACAQLNDFLQEYGTQGCQV**  
 (Parameters: blastp, nr protein database, expect=20000, no filter, PAM30)  
 Other BLAST [web gateways](#)

### All matches to this query

| Score | Mr(calc):   | Delta    | Sequence                             |
|-------|-------------|----------|--------------------------------------|
| 64.7  | 2583.155624 | 0.009568 | <a href="#">AACAQLNDFLQEYGTQGCQV</a> |
| 21.7  | 2583.155624 | 0.009568 | <a href="#">AACAQLNDFLQEYGTQGCQV</a> |





# MASCOT SEARCH RESULTS

## Peptide View

MS/MS Fragmentation of **GEQIQLK**

Found in **COS\_HUMAN**, Complement C5 OS=Homo sapiens GN=C5 PE=1 SV=4

Match to Query 14948: 1125.619048 from(563.816800,2+) rtinseconds(1768) index(30383)

Title: Locus:1.1.1.3279.14 File:"2013-07-02 CLN FXIII 180 min 3rd F 3.wiff"

Data file C:\Program Files (x86)\Matrix Science\Mascot Daemon\mgf9 FXIII 180 min 3rd\mascot\_daemon\_merge.mgf

Click mouse within plot area to zoom in by factor of two about that point

Or, Plot from  to  Da

Label all possible matches  Label matches used for scoring

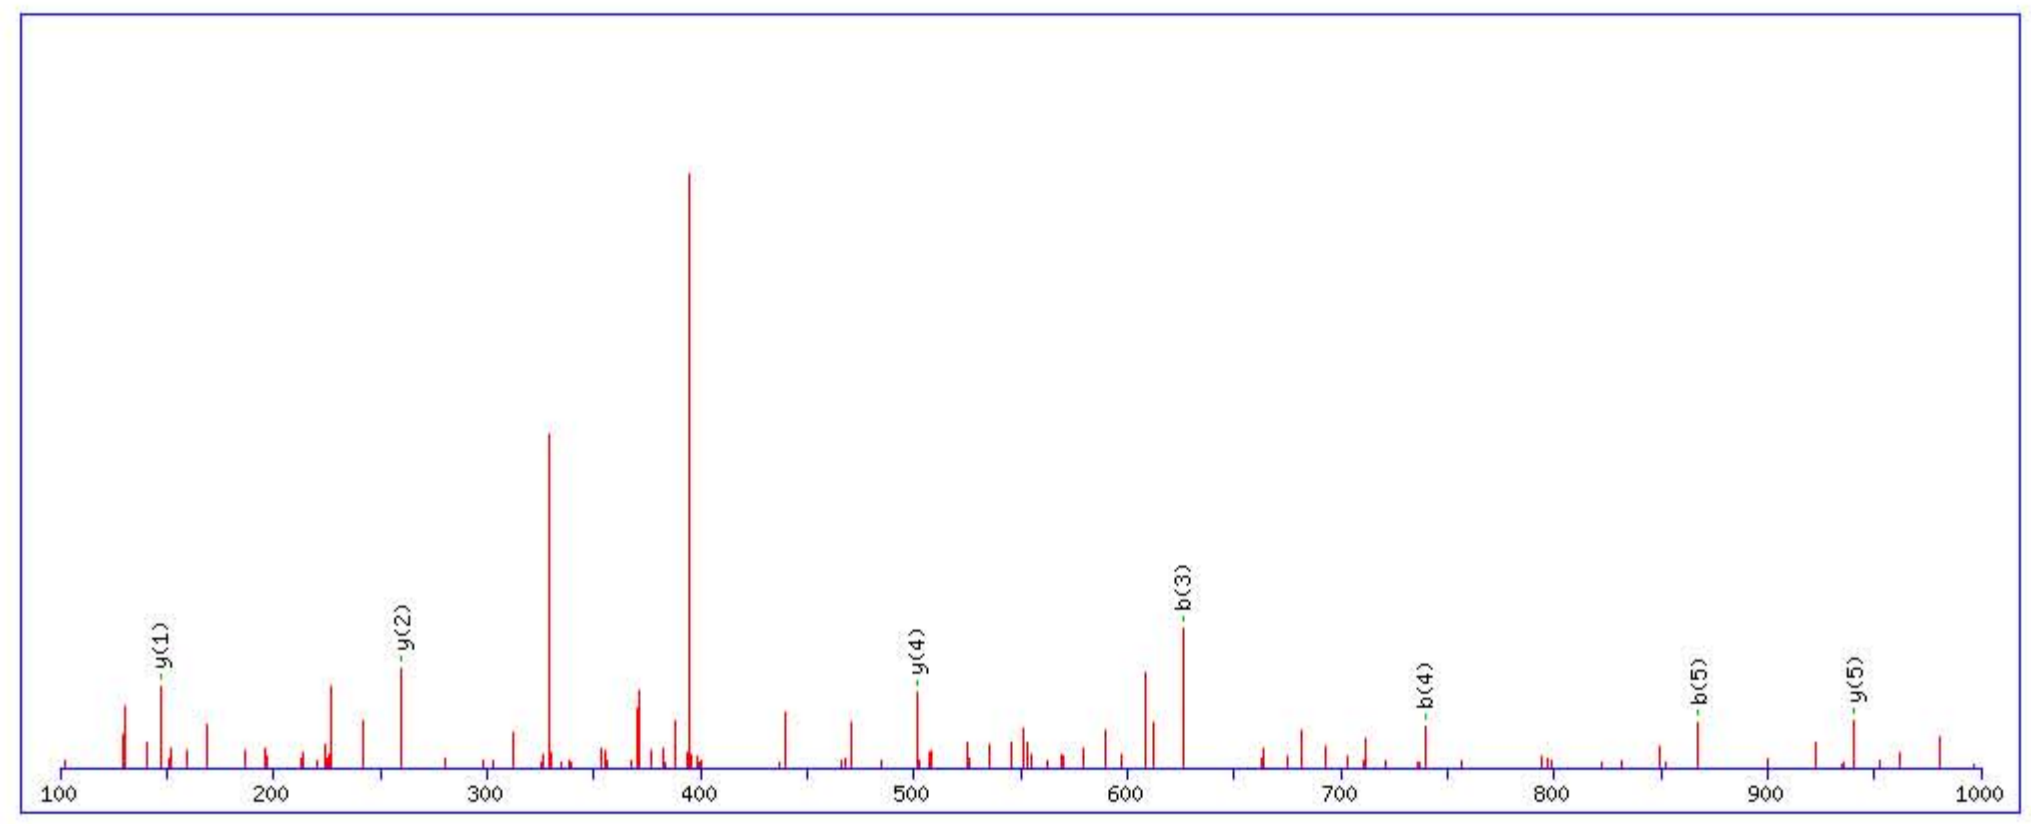

Monoisotopic mass of neutral peptide Mr(calc): 1125.621597

Fixed modifications: Carbamidomethyl (C) (apply to specified residues or termini only)

Variable modifications:

Q3 : Biotin:Thermo-21345 (Q)

Ions Score: 27 Expect: 0.04

Matches : 7/56 fragment ions using 9 most intense peaks [\(help\)](#)

| # | b                 | b <sup>++</sup> | b <sup>*</sup> | b <sup>*++</sup> | b <sup>0</sup> | b <sup>0++</sup> | Seq. | y                 | y <sup>++</sup> | y <sup>*</sup> | y <sup>*++</sup> | y <sup>0</sup> | y <sup>0++</sup> | # |
|---|-------------------|-----------------|----------------|------------------|----------------|------------------|------|-------------------|-----------------|----------------|------------------|----------------|------------------|---|
| 1 | 58.028740         | 29.518008       |                |                  |                |                  | G    |                   |                 |                |                  |                |                  | 7 |
| 2 | 187.071333        | 94.039305       |                |                  | 169.060768     | 85.034022        | E    | 1069.607429       | 535.307353      | 1052.580880    | 526.794078       | 1051.596864    | 526.302070       | 6 |
| 3 | <b>626.296659</b> | 313.651968      | 609.270110     | 305.138693       | 608.286094     | 304.646685       | Q    | <b>940.564836</b> | 470.786056      | 923.538287     | 462.272782       |                |                  | 5 |
| 4 | <b>739.380723</b> | 370.194000      | 722.354174     | 361.680725       | 721.370158     | 361.188717       | I    | <b>501.339510</b> | 251.173393      | 484.312961     | 242.660119       |                |                  | 4 |
| 5 | <b>867.439301</b> | 434.223289      | 850.412752     | 425.710014       | 849.428736     | 425.218006       | Q    | 388.255446        | 194.631361      | 371.228897     | 186.118087       |                |                  | 3 |
| 6 | 980.523365        | 490.765321      | 963.496816     | 482.252046       | 962.512800     | 481.760038       | L    | <b>260.196868</b> | 130.602072      | 243.170319     | 122.088798       |                |                  | 2 |
| 7 |                   |                 |                |                  |                |                  | K    | <b>147.112804</b> | 74.060040       | 130.086255     | 65.546766        |                |                  | 1 |

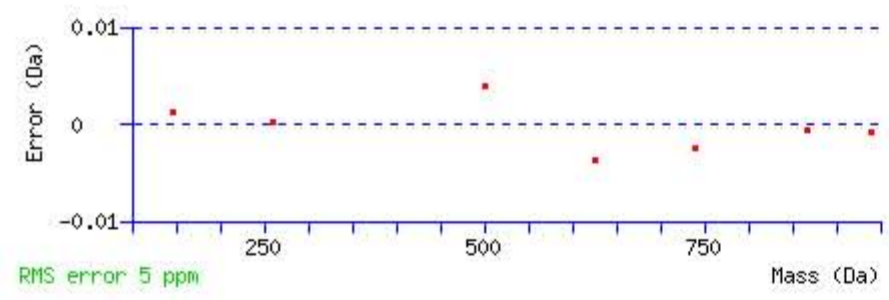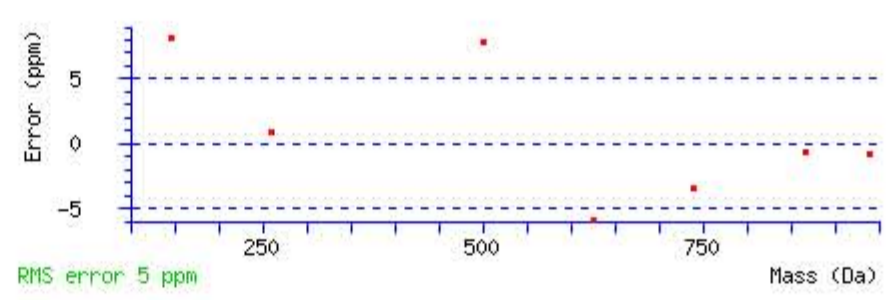

NCBI BLAST search of [GEQIQLK](#)

(Parameters: blastp, nr protein database, expect=20000, no filter, PAM30)

Other BLAST [web gateways](#)

### All matches to this query

| Score | Mr(calc):   | Delta     | Sequence                   |
|-------|-------------|-----------|----------------------------|
| 27.3  | 1125.621597 | -0.002549 | <a href="#">GEQIQLK</a>    |
| 11.7  | 1125.621597 | -0.002549 | <a href="#">EQVAQLK</a>    |
| 11.6  | 1125.632813 | -0.013764 | <a href="#">EQAARK</a>     |
| 10.3  | 1125.632828 | -0.013780 | <a href="#">KLCLSHLQK</a>  |
| 10.0  | 1125.607666 | 0.011382  | <a href="#">QMDRHAKIK</a>  |
| 7.6   | 1125.602966 | 0.016082  | <a href="#">VSISKSTYNK</a> |
| 7.2   | 1125.606979 | 0.012069  | <a href="#">LKEAFDYIK</a>  |
| 7.1   | 1125.629486 | -0.010438 | <a href="#">RVDGWVPLGK</a> |
| 6.1   | 1125.621597 | -0.002549 | <a href="#">GEQIQLK</a>    |
| 6.1   | 1125.633499 | -0.014451 | <a href="#">VSHFLPWIK</a>  |

# **MASCOT** Mascot Search Results

## Peptide View

MS/MS Fragmentation of **QYLIMGK**

Found in **CO5\_HUMAN**, Complement C5 OS=Homo sapiens GN=C5 PE=1 SV=4

Match to Query 16610: 1162.621308 from(582.317930,2+) rtinseconds(2121) index(32577)

Title: Locus:1.1.1.3402.7 File:"2013-07-02 CLN FXIII 180 min 3rd F 3.wiff"

Data file C:\Program Files (x86)\Matrix Science\Mascot Daemon\mgf9 FXIII 180 min 3rd\mascot\_daemon\_merge.mgf

Click mouse within plot area to zoom in by factor of two about that point

Or, Plot from  to  Da

Label all possible matches  Label matches used for scoring

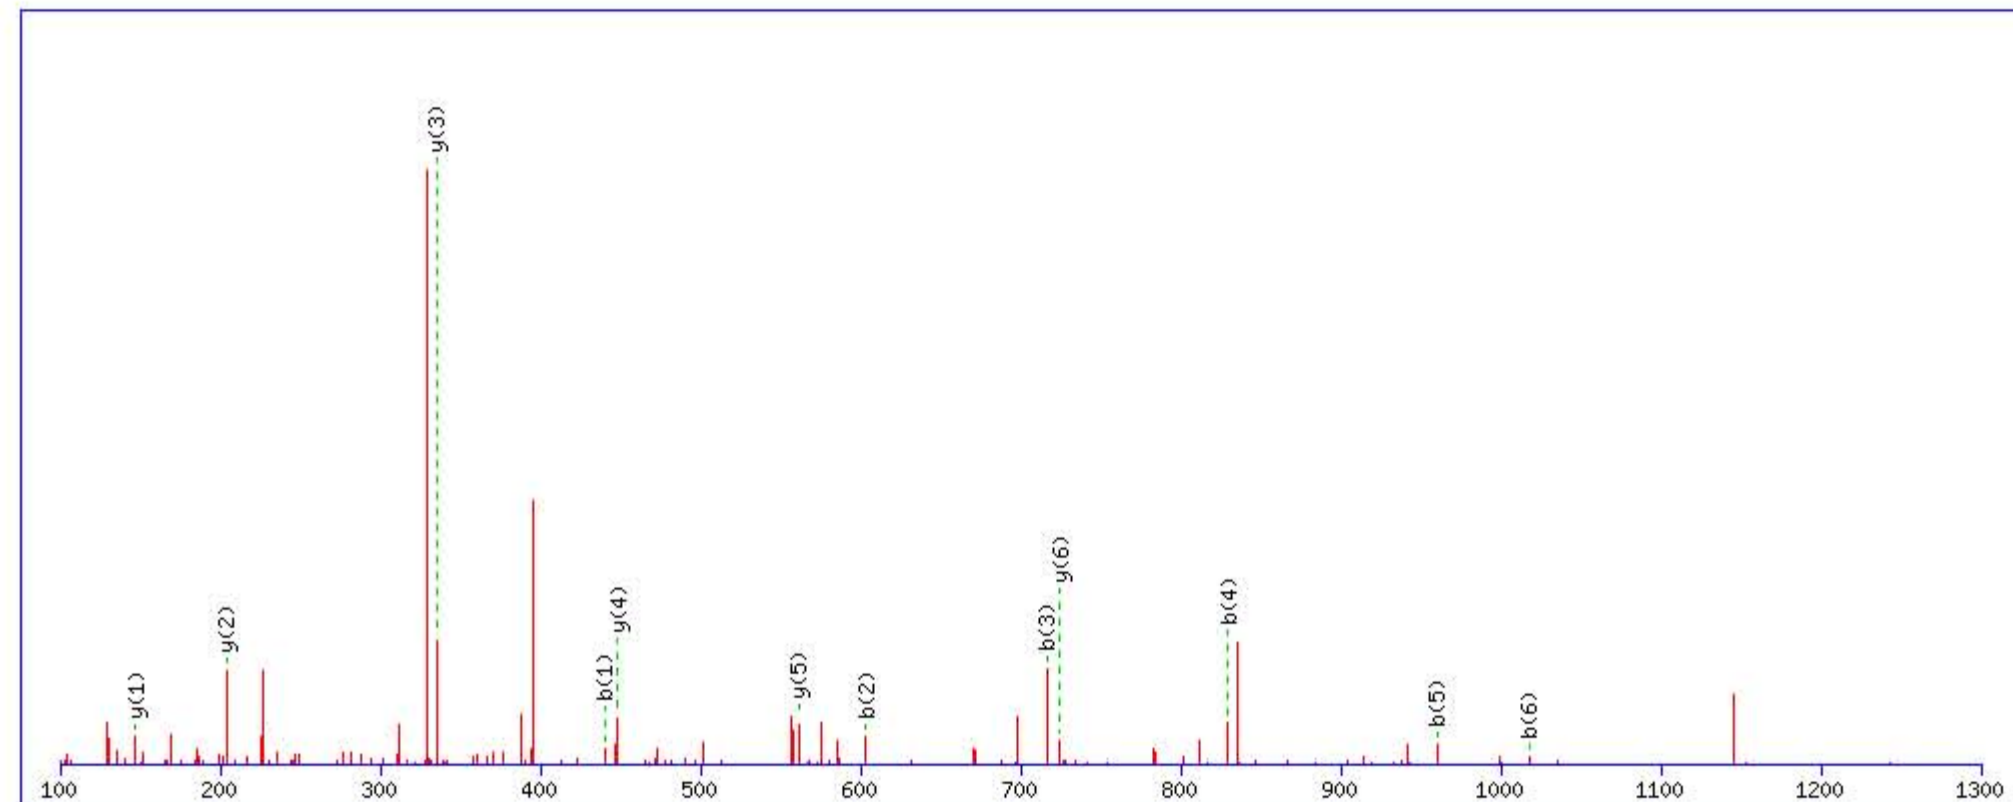

Monoisotopic mass of neutral peptide Mr(calc): 1162.624237

Fixed modifications: Carbamidomethyl (C) (apply to specified residues or termini only)

Variable modifications:

Q1 : Biotin:Thermo-21345 (Q)

Ions Score: 25 Expect: 0.018

Matches : 12/48 fragment ions using 31 most intense peaks [\(help\)](#)

| # | b           | b <sup>++</sup> | b <sup>*</sup> | b <sup>*++</sup> | Seq. | y          | y <sup>++</sup> | y <sup>*</sup> | y <sup>*++</sup> | # |
|---|-------------|-----------------|----------------|------------------|------|------------|-----------------|----------------|------------------|---|
| 1 | 440.232602  | 220.619939      | 423.206053     | 212.106664       | Q    |            |                 |                |                  | 7 |
| 2 | 603.295931  | 302.151604      | 586.269382     | 293.638329       | Y    | 724.406210 | 362.706743      | 707.379661     | 354.193469       | 6 |
| 3 | 716.379995  | 358.693636      | 699.353446     | 350.180361       | L    | 561.342881 | 281.175079      | 544.316332     | 272.661804       | 5 |
| 4 | 829.464059  | 415.235668      | 812.437510     | 406.722393       | I    | 448.258817 | 224.633046      | 431.232268     | 216.119772       | 4 |
| 5 | 960.504544  | 480.755910      | 943.477995     | 472.242636       | M    | 335.174753 | 168.091014      | 318.148204     | 159.577740       | 3 |
| 6 | 1017.526008 | 509.266642      | 1000.499459    | 500.753368       | G    | 204.134268 | 102.570772      | 187.107719     | 94.057497        | 2 |
| 7 |             |                 |                |                  | K    | 147.112804 | 74.060040       | 130.086255     | 65.546765        | 1 |

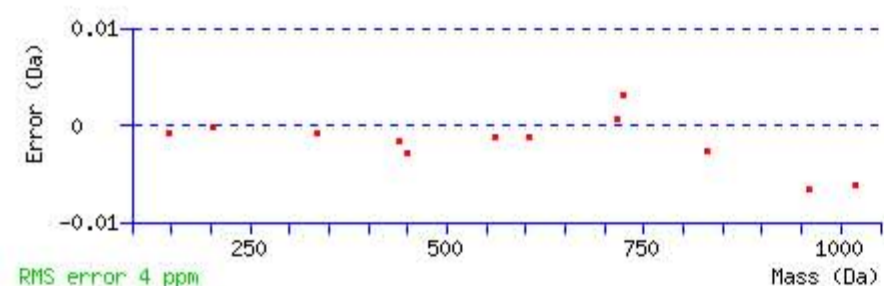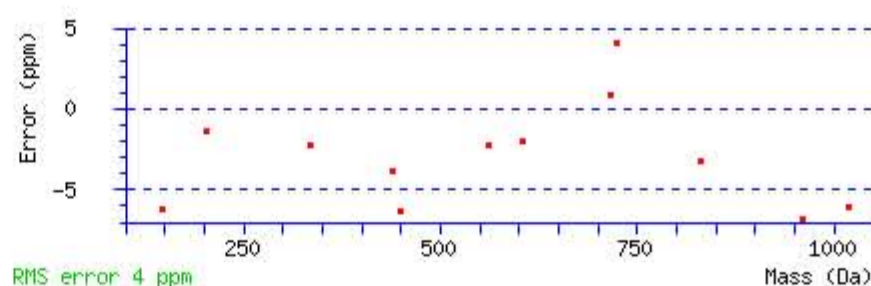

NCBI BLAST search of **QYLIMGK**

(Parameters: blastp, nr protein database, expect=20000, no filter, PAM30)

Other BLAST [web gateways](#)

## All matches to this query

| Score | Mr(calc):   | Delta     | Sequence                   |
|-------|-------------|-----------|----------------------------|
| 25.0  | 1162.624237 | -0.002929 | <a href="#">QYLIMGK</a>    |
| 6.0   | 1162.624069 | -0.002761 | <a href="#">VGRCRSLSTK</a> |
| 5.5   | 1162.626724 | -0.005416 | <a href="#">KVEIAEMSLK</a> |
| 4.0   | 1162.626740 | -0.005432 | <a href="#">EVLKMDTSIK</a> |
| 3.5   | 1162.609451 | 0.011857  | <a href="#">QNTNKFNGIK</a> |
| 1.6   | 1162.612823 | 0.008485  | <a href="#">KTVAMSNLQR</a> |
| 1.6   | 1162.620697 | 0.000611  | <a href="#">QLSGQRFTAR</a> |
| 1.1   | 1162.628098 | -0.006790 | <a href="#">AGLGPQGPR</a>  |
| 1.0   | 1162.635956 | -0.014648 | <a href="#">WGGFLGRRSK</a> |
| 0.5   | 1162.637955 | -0.016647 | <a href="#">KLEMATNKTK</a> |

# MASCOT Search Results

## Peptide View

MS/MS Fragmentation of **WLSEEQR**

Found in **COS\_HUMAN**, Complement C5 OS=Homo sapiens GN=C5 PE=1 SV=4

Match to Query 19174: 1257.615708 from(629.815130,2+) rtinseconds(1848) index(30858)

Title: Locus:1.1.1.3307.10 File:"2013-07-02 CLN FXIII 180 min 3rd F 3.wiff"

Data file C:\Program Files (x86)\Matrix Science\Mascot Daemon\mgf9 FXIII 180 min 3rd\mascot\_daemon\_merge.mgf

Click mouse within plot area to zoom in by factor of two about that point

Or, Plot from  to  Da

Label all possible matches  Label matches used for scoring

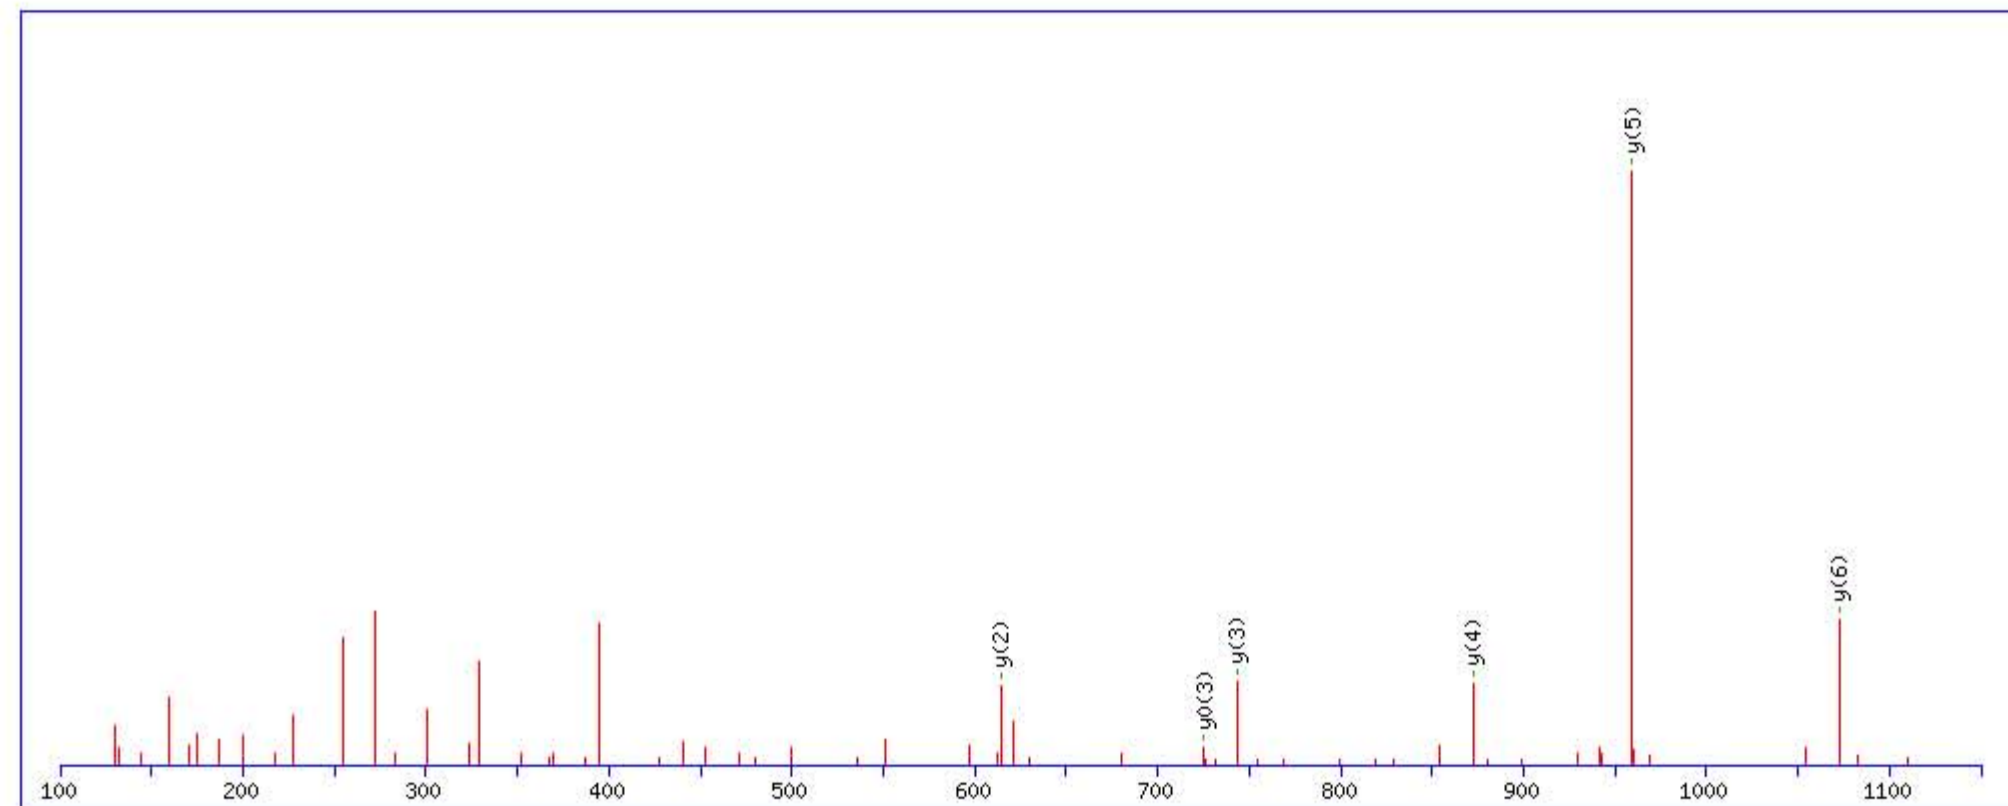

Monoisotopic mass of neutral peptide Mr(calc): 1257.617569

Fixed modifications: Carbamidomethyl (C) (apply to specified residues or termini only)

Variable modifications:

Q6 : Biotin:Thermo-21345 (Q)

Ions Score: 33 Expect: 0.0097

Matches : 6/54 fragment ions using 10 most intense peaks [\(help\)](#)

| # | b           | b <sup>++</sup> | b <sup>+</sup> | b <sup>+++</sup> | b <sup>0</sup> | b <sup>0++</sup> | Seq. | y           | y <sup>++</sup> | y <sup>+</sup> | y <sup>+++</sup> | y <sup>0</sup> | y <sup>0++</sup> | # |
|---|-------------|-----------------|----------------|------------------|----------------|------------------|------|-------------|-----------------|----------------|------------------|----------------|------------------|---|
| 1 | 187.086589  | 94.046932       |                |                  |                |                  | W    |             |                 |                |                  |                |                  | 7 |
| 2 | 300.170653  | 150.588965      |                |                  |                |                  | L    | 1072.545556 | 536.776416      | 1055.519007    | 528.263142       | 1054.534991    | 527.771134       | 6 |
| 3 | 387.202681  | 194.104979      |                |                  | 369.192116     | 185.099696       | S    | 959.461492  | 480.234384      | 942.434943     | 471.721109       | 941.450927     | 471.229101       | 5 |
| 4 | 516.245274  | 258.626275      |                |                  | 498.234709     | 249.620993       | E    | 872.429464  | 436.718370      | 855.402915     | 428.205095       | 854.418899     | 427.713087       | 4 |
| 5 | 645.287867  | 323.147572      |                |                  | 627.277302     | 314.142289       | E    | 743.386871  | 372.197073      | 726.360322     | 363.683799       | 725.376306     | 363.191791       | 3 |
| 6 | 1084.513193 | 542.760235      | 1067.486644    | 534.246960       | 1066.502628    | 533.754952       | Q    | 614.344278  | 307.675777      | 597.317729     | 299.162502       |                |                  | 2 |
| 7 |             |                 |                |                  |                |                  | R    | 175.118952  | 88.063114       | 158.092403     | 79.549839        |                |                  | 1 |

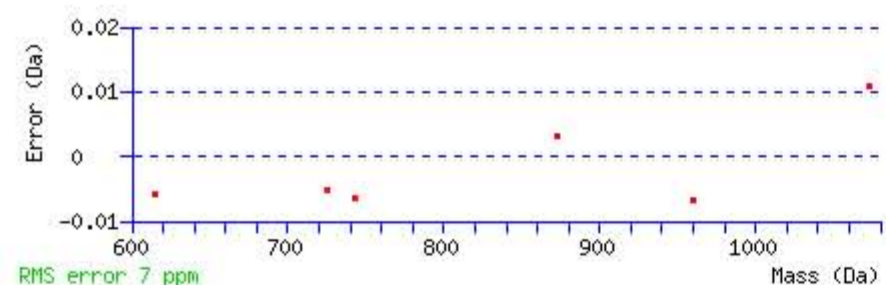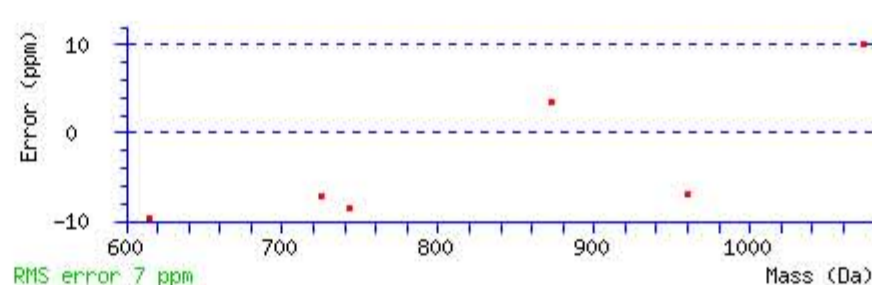

NCBI BLAST search of **WLSEEQR**

(Parameters: blastp, nr protein database, expect=20000, no filter, PAM30)

Other BLAST [web gateways](#)

## All matches to this query

| Score | Mr(calc):   | Delta     | Sequence                     |
|-------|-------------|-----------|------------------------------|
| 32.5  | 1257.617569 | -0.001861 | <a href="#">WLSEEQR</a>      |
| 11.2  | 1257.621414 | -0.005706 | <a href="#">ASSNRSWTPPR</a>  |
| 5.4   | 1257.602295 | 0.013413  | <a href="#">EKEEEQR</a>      |
| 3.5   | 1257.621445 | -0.005737 | <a href="#">GFRGETGPQGPR</a> |
| 3.0   | 1257.631287 | -0.015579 | <a href="#">ADAEELKQQR</a>   |
| 2.7   | 1257.606155 | 0.009553  | <a href="#">DASSRANGIPDR</a> |
| 2.2   | 1257.617599 | -0.001891 | <a href="#">QADVFPDR</a>     |
| 2.1   | 1257.607040 | 0.008668  | <a href="#">RGVCAGAMAPPR</a> |
| 0.6   | 1257.620071 | -0.004363 | <a href="#">EGLEEGDQILR</a>  |

# MASCOT SCIENCE Mascot Search Results

## Peptide View

MS/MS Fragmentation of **AFTECCVVASQLR**

Found in **COS\_HUMAN**, Complement C5 OS=Homo sapiens GN=C5 PE=1 SV=4

Match to Query 36629: 1850.881628 from(926.448090,2+) rtinseconds(2194) index(32995)

Title: Locus:1.1.1.3427.15 File:"2013-07-02 CLN FXIII 180 min 3rd F 3.wiff"

Data file C:\Program Files (x86)\Matrix Science\Mascot Daemon\mgf\9 FXIII 180 min 3rd\mascot\_daemon\_merge.mgf

Click mouse within plot area to zoom in by factor of two about that point

Or, Plot from  to  Da

Label all possible matches  Label matches used for scoring

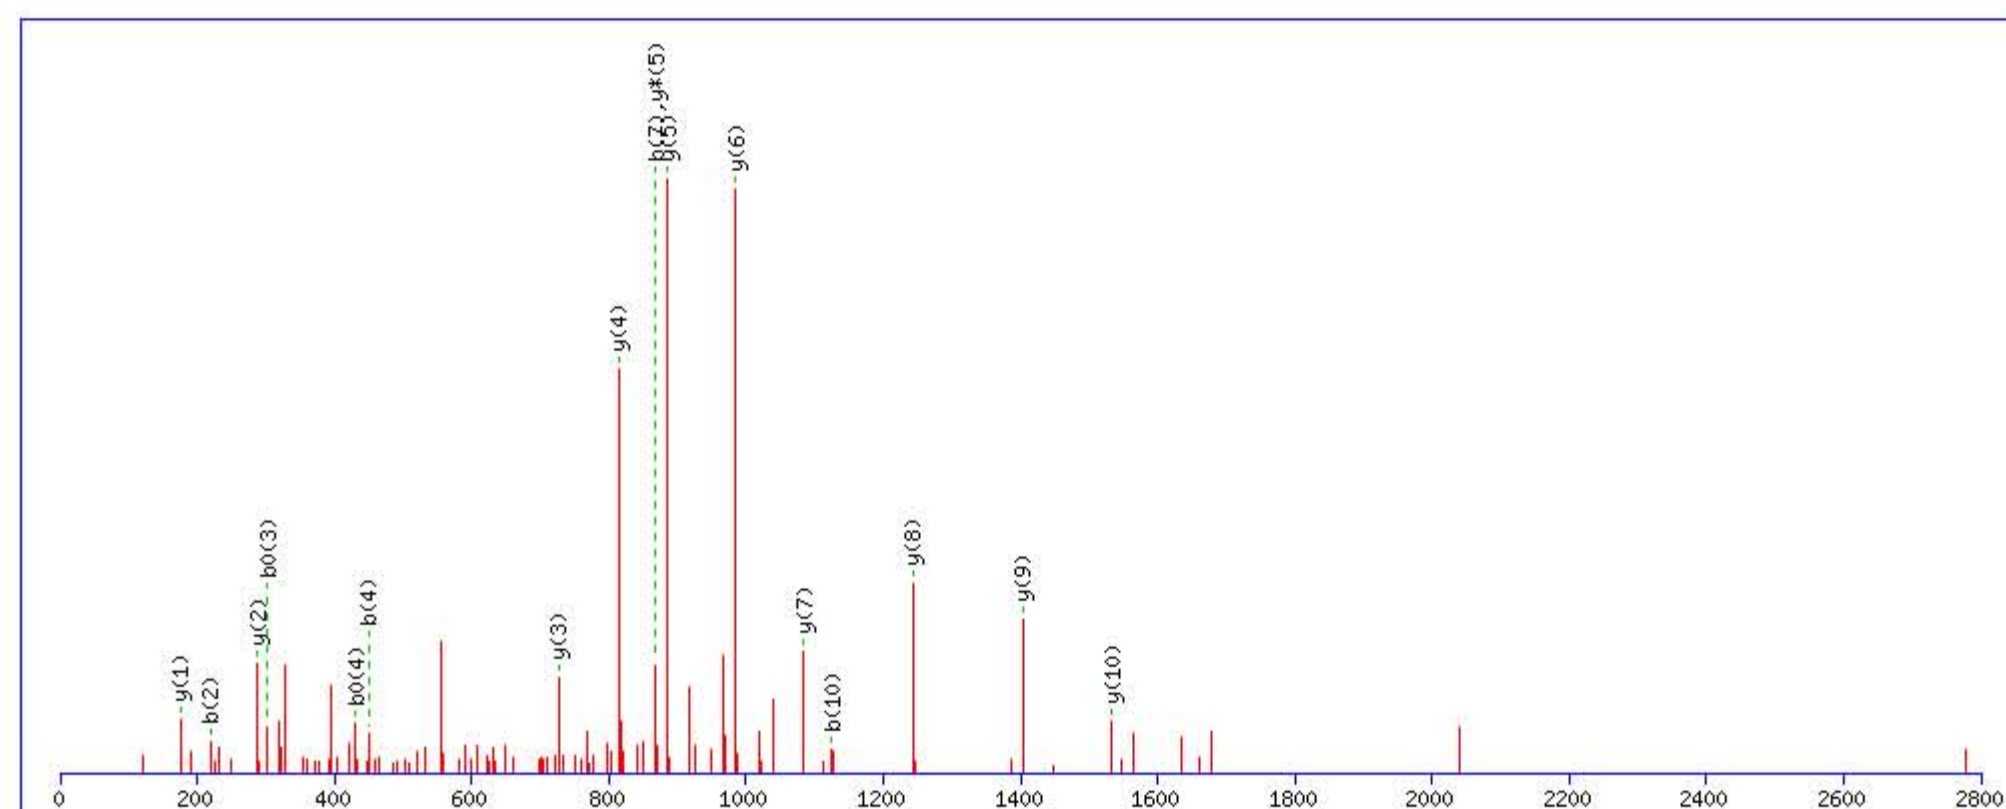

Monoisotopic mass of neutral peptide Mr(calc): 1850.884140

Fixed modifications: Carbamidomethyl (C) (apply to specified residues or termini only)

Variable modifications:

Q11 : Biotin:Thermo-21345 (Q)

Ions Score: 61 Expect: 7.7e-006

Matches : 17/114 fragment ions using 31 most intense peaks ([help](#))

| #  | b                  | b <sup>++</sup> | b <sup>+</sup> | b <sup>+++</sup> | b <sup>0</sup>    | b <sup>0++</sup> | Seq. | y                  | y <sup>++</sup> | y <sup>+</sup>    | y <sup>+++</sup> | y <sup>0</sup> | y <sup>0++</sup> | #  |
|----|--------------------|-----------------|----------------|------------------|-------------------|------------------|------|--------------------|-----------------|-------------------|------------------|----------------|------------------|----|
| 1  | 72.044390          | 36.525833       |                |                  |                   |                  | A    |                    |                 |                   |                  |                |                  | 13 |
| 2  | <b>219.112804</b>  | 110.060040      |                |                  |                   |                  | F    | 1780.854296        | 890.930786      | 1763.827747       | 882.417512       | 1762.843731    | 881.925504       | 12 |
| 3  | 320.160483         | 160.583879      |                |                  | <b>302.149918</b> | 151.578597       | T    | 1633.785882        | 817.396579      | 1616.759333       | 808.883305       | 1615.775317    | 808.391297       | 11 |
| 4  | <b>449.203076</b>  | 225.105176      |                |                  | <b>431.192511</b> | 216.099894       | E    | <b>1532.738203</b> | 766.872740      | 1515.711654       | 758.359465       | 1514.727638    | 757.867457       | 10 |
| 5  | 609.233725         | 305.120501      |                |                  | 591.223160        | 296.115218       | C    | <b>1403.695610</b> | 702.351443      | 1386.669061       | 693.838169       | 1385.685045    | 693.346161       | 9  |
| 6  | 769.264374         | 385.135825      |                |                  | 751.253809        | 376.130543       | C    | <b>1243.664961</b> | 622.336119      | 1226.638412       | 613.822844       | 1225.654396    | 613.330836       | 8  |
| 7  | <b>868.332788</b>  | 434.670032      |                |                  | 850.322223        | 425.664750       | V    | <b>1083.634312</b> | 542.320794      | 1066.607763       | 533.807520       | 1065.623747    | 533.315512       | 7  |
| 8  | 967.401202         | 484.204239      |                |                  | 949.390637        | 475.198957       | V    | <b>984.565898</b>  | 492.786587      | 967.539349        | 484.273313       | 966.555333     | 483.781305       | 6  |
| 9  | 1038.438316        | 519.722796      |                |                  | 1020.427751       | 510.717514       | A    | <b>885.497484</b>  | 443.252380      | <b>868.470935</b> | 434.739106       | 867.486919     | 434.247098       | 5  |
| 10 | <b>1125.470344</b> | 563.238810      |                |                  | 1107.459779       | 554.233528       | S    | <b>814.460370</b>  | 407.733823      | 797.433821        | 399.220549       | 796.449805     | 398.728541       | 4  |
| 11 | 1564.695670        | 782.851473      | 1547.669121    | 774.338199       | 1546.685105       | 773.846191       | Q    | <b>727.428342</b>  | 364.217809      | 710.401793        | 355.704535       |                |                  | 3  |
| 12 | 1677.779734        | 839.393505      | 1660.753185    | 830.880231       | 1659.769169       | 830.388223       | L    | <b>288.203016</b>  | 144.605146      | 271.176467        | 136.091871       |                |                  | 2  |
| 13 |                    |                 |                |                  |                   |                  | R    | <b>175.118952</b>  | 88.063114       | 158.092403        | 79.549839        |                |                  | 1  |

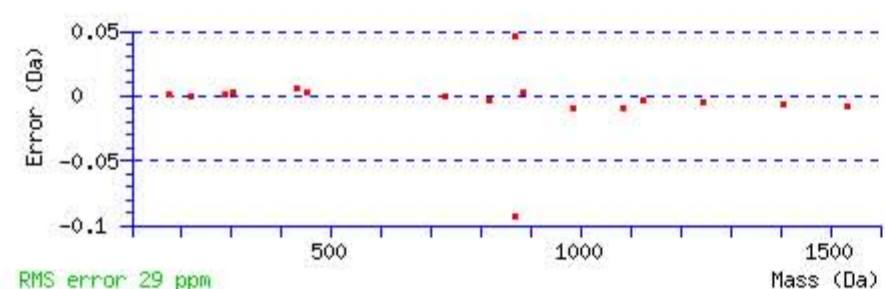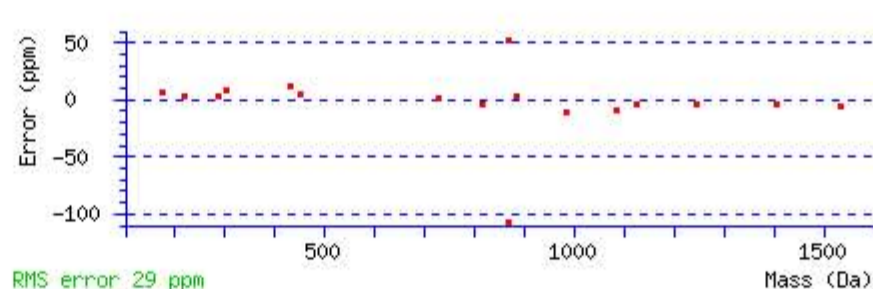

NCBI BLAST search of **AFTECCVVASQLR**

(Parameters: blastp, nr protein database, expect=20000, no filter, PAM30)

Other BLAST [web gateways](#)

All matches to this query

| Score | Mr(calc):   | Delta     | Sequence                            |
|-------|-------------|-----------|-------------------------------------|
| 61.5  | 1850.884140 | -0.002512 | <a href="#">AFTECCVVASQLR</a>       |
| 6.5   | 1850.898499 | -0.016871 | <a href="#">EDGMPVPELYNRIFR</a>     |
| 0.2   | 1850.893127 | -0.011499 | <a href="#">AMESTATAAVAAELVSADK</a> |

Mascot: <http://www.matrixscience.com/>

**MATRIX SCIENCE Mascot Search Results**

**Peptide View**

MS/MS Fragmentation of **ALVEGV DQLFTDYQIK**  
 Found in **CO5\_HUMAN**, Complement C5 OS=Homo sapiens GN=C5 PE=1 SV=4

Match to Query 42317: 2149.131308 from(1075.572930,2+) rtinseconds(2848) index(37024)  
 Title: Locus:1.1.1.3653.6 File:"2013-07-02 CLN FXIII 180 min 3rd F 3.wiff"  
 Data file C:\Program Files (x86)\Matrix Science\Mascot Daemon\mgf\9 FXIII 180 min 3rd\mascot\_daemon\_merge.mgf

Click mouse within plot area to zoom in by factor of two about that point  
 Or, Plot from  to  Da   
 Label all possible matches  Label matches used for scoring

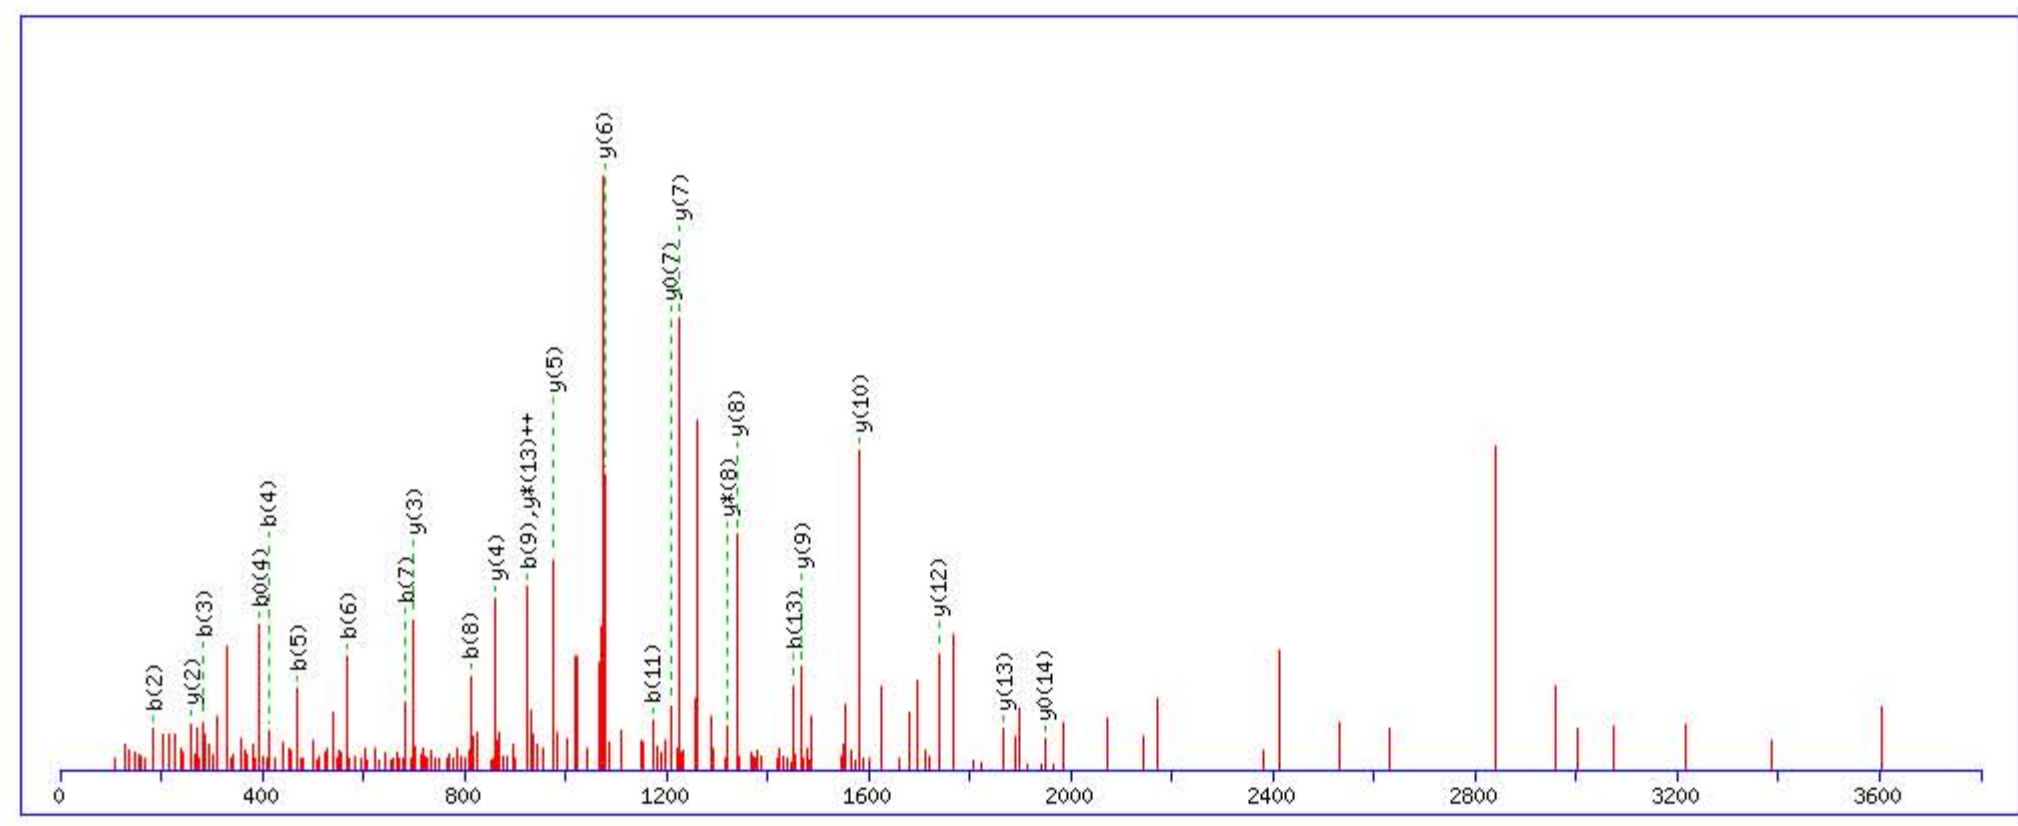

Monoisotopic mass of neutral peptide Mr(calc): 2149.112930  
 Fixed modifications: Carbamidomethyl (C) (apply to specified residues or termini only)  
 Variable modifications:  
 Q14 : Biotin:Thermo-21345 (Q)  
 Ions Score: 76 Expect: 7.9e-008  
 Matches : 26/152 fragment ions using 40 most intense peaks [\(help\)](#)

| #  | b                  | b <sup>++</sup> | b <sup>*</sup> | b <sup>*++</sup> | b <sup>0</sup>    | b <sup>0++</sup> | Seq. | y                  | y <sup>++</sup> | y <sup>*</sup>     | y <sup>*++</sup>  | y <sup>0</sup>     | y <sup>0++</sup> | #  |
|----|--------------------|-----------------|----------------|------------------|-------------------|------------------|------|--------------------|-----------------|--------------------|-------------------|--------------------|------------------|----|
| 1  | 72.044390          | 36.525833       |                |                  |                   |                  | A    |                    |                 |                    |                   |                    |                  | 16 |
| 2  | <b>185.128454</b>  | 93.067865       |                |                  |                   |                  | L    | 2079.083093        | 1040.045184     | 2062.056544        | 1031.531910       | 2061.072528        | 1031.039902      | 15 |
| 3  | <b>284.196868</b>  | 142.602072      |                |                  |                   |                  | V    | 1965.999029        | 983.503153      | 1948.972480        | 974.989878        | <b>1947.988464</b> | 974.497870       | 14 |
| 4  | <b>413.239461</b>  | 207.123369      |                |                  | <b>395.228896</b> | 198.118086       | E    | <b>1866.930615</b> | 933.968946      | 1849.904066        | <b>925.455671</b> | 1848.920050        | 924.963663       | 13 |
| 5  | <b>470.260925</b>  | 235.634100      |                |                  | 452.250360        | 226.628818       | G    | <b>1737.888022</b> | 869.447649      | 1720.861473        | 860.934375        | 1719.877457        | 860.442367       | 12 |
| 6  | <b>569.329339</b>  | 285.168308      |                |                  | 551.318774        | 276.163025       | V    | 1680.866558        | 840.936917      | 1663.840009        | 832.423643        | 1662.855993        | 831.931635       | 11 |
| 7  | <b>684.356282</b>  | 342.681779      |                |                  | 666.345717        | 333.676496       | D    | <b>1581.798144</b> | 791.402710      | 1564.771595        | 782.889436        | 1563.787579        | 782.397428       | 10 |
| 8  | <b>812.414860</b>  | 406.711068      | 795.388311     | 398.197793       | 794.404295        | 397.705785       | Q    | <b>1466.771201</b> | 733.889239      | 1449.744652        | 725.375964        | 1448.760636        | 724.883956       | 9  |
| 9  | <b>925.498924</b>  | 463.253100      | 908.472375     | 454.739825       | 907.488359        | 454.247818       | L    | <b>1338.712623</b> | 669.859950      | <b>1321.686074</b> | 661.346675        | 1320.702058        | 660.854667       | 8  |
| 10 | 1072.567338        | 536.787307      | 1055.540789    | 528.274033       | 1054.556773       | 527.782025       | F    | <b>1225.628559</b> | 613.317918      | 1208.602010        | 604.804643        | <b>1207.617994</b> | 604.312635       | 7  |
| 11 | <b>1173.615017</b> | 587.311147      | 1156.588468    | 578.797872       | 1155.604452       | 578.305864       | T    | <b>1078.560145</b> | 539.783711      | 1061.533596        | 531.270436        | 1060.549580        | 530.778428       | 6  |
| 12 | 1288.641960        | 644.824618      | 1271.615411    | 636.311344       | 1270.631395       | 635.819336       | D    | <b>977.512466</b>  | 489.259871      | 960.485917         | 480.746597        | 959.501901         | 480.254589       | 5  |
| 13 | <b>1451.705289</b> | 726.356283      | 1434.678740    | 717.843008       | 1433.694724       | 717.351000       | Y    | <b>862.485523</b>  | 431.746400      | 845.458974         | 423.233125        |                    |                  | 4  |
| 14 | 1890.930615        | 945.968946      | 1873.904066    | 937.455671       | 1872.920050       | 936.963663       | Q    | <b>699.422194</b>  | 350.214735      | 682.395645         | 341.701461        |                    |                  | 3  |
| 15 | 2004.014679        | 1002.510978     | 1986.988130    | 993.997703       | 1986.004114       | 993.505695       | I    | <b>260.196868</b>  | 130.602072      | 243.170319         | 122.088797        |                    |                  | 2  |
| 16 |                    |                 |                |                  |                   |                  | K    | 147.112804         | 74.060040       | 130.086255         | 65.546765         |                    |                  | 1  |

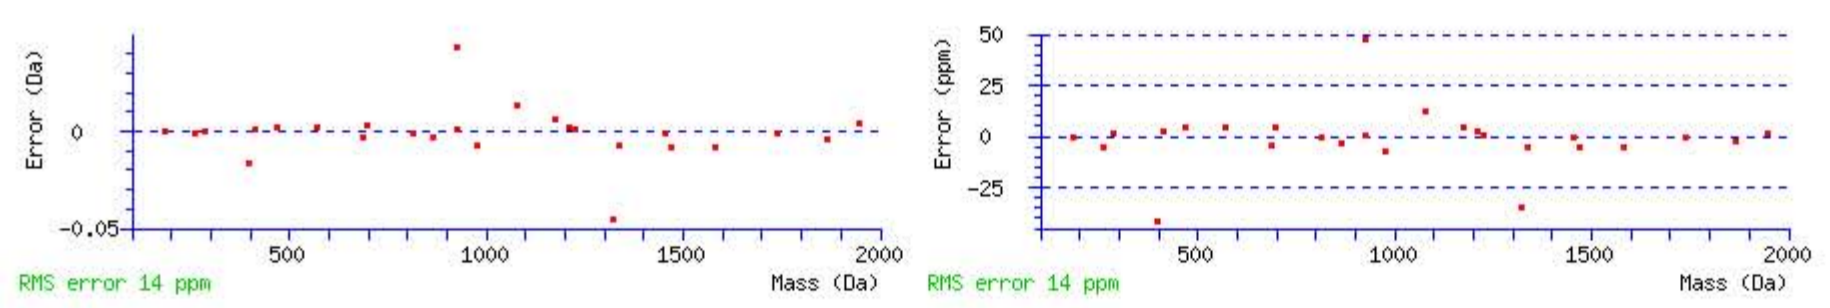

NCBI BLAST search of **ALVEGV DQLFTDYQIK**  
 (Parameters: blastp, nr protein database, expect=20000, no filter, PAM30)  
 Other BLAST [web gateways](#)

**All matches to this query**

| Score | Mr(calc):   | Delta    | Sequence                          |
|-------|-------------|----------|-----------------------------------|
| 76.2  | 2149.112930 | 0.018378 | <a href="#">ALVEGV DQLFTDYQIK</a> |
| 13.6  | 2149.112930 | 0.018378 | <a href="#">ALVEGV DQLFTDYQIK</a> |
| 0.5   | 2149.116257 | 0.015051 | <a href="#">QDEQLAMKLLTYELK</a>   |

**Peptide View**

MS/MS Fragmentation of **CCYDGACVNNDTCEQR**

Found in **CO5\_HUMAN**, Complement C5 OS=Homo sapiens GN=C5 PE=1 SV=4

Match to Query 47462: 2460.930432 from(821.317420,3+) rtinseconds(1600) index(29397)  
 Title: Locus:1.1.1.3220.18 File:"2013-07-02 CLN FXIII 180 min 3rd F 3.wiff"  
 Data file C:\Program Files (x86)\Matrix Science\Mascot Daemon\mgf\9 FXIII 180 min 3rd\mascot\_daemon\_merge.mgf

Click mouse within plot area to zoom in by factor of two about that point  
 Or, Plot from  to  Da   
 Label all possible matches  Label matches used for scoring

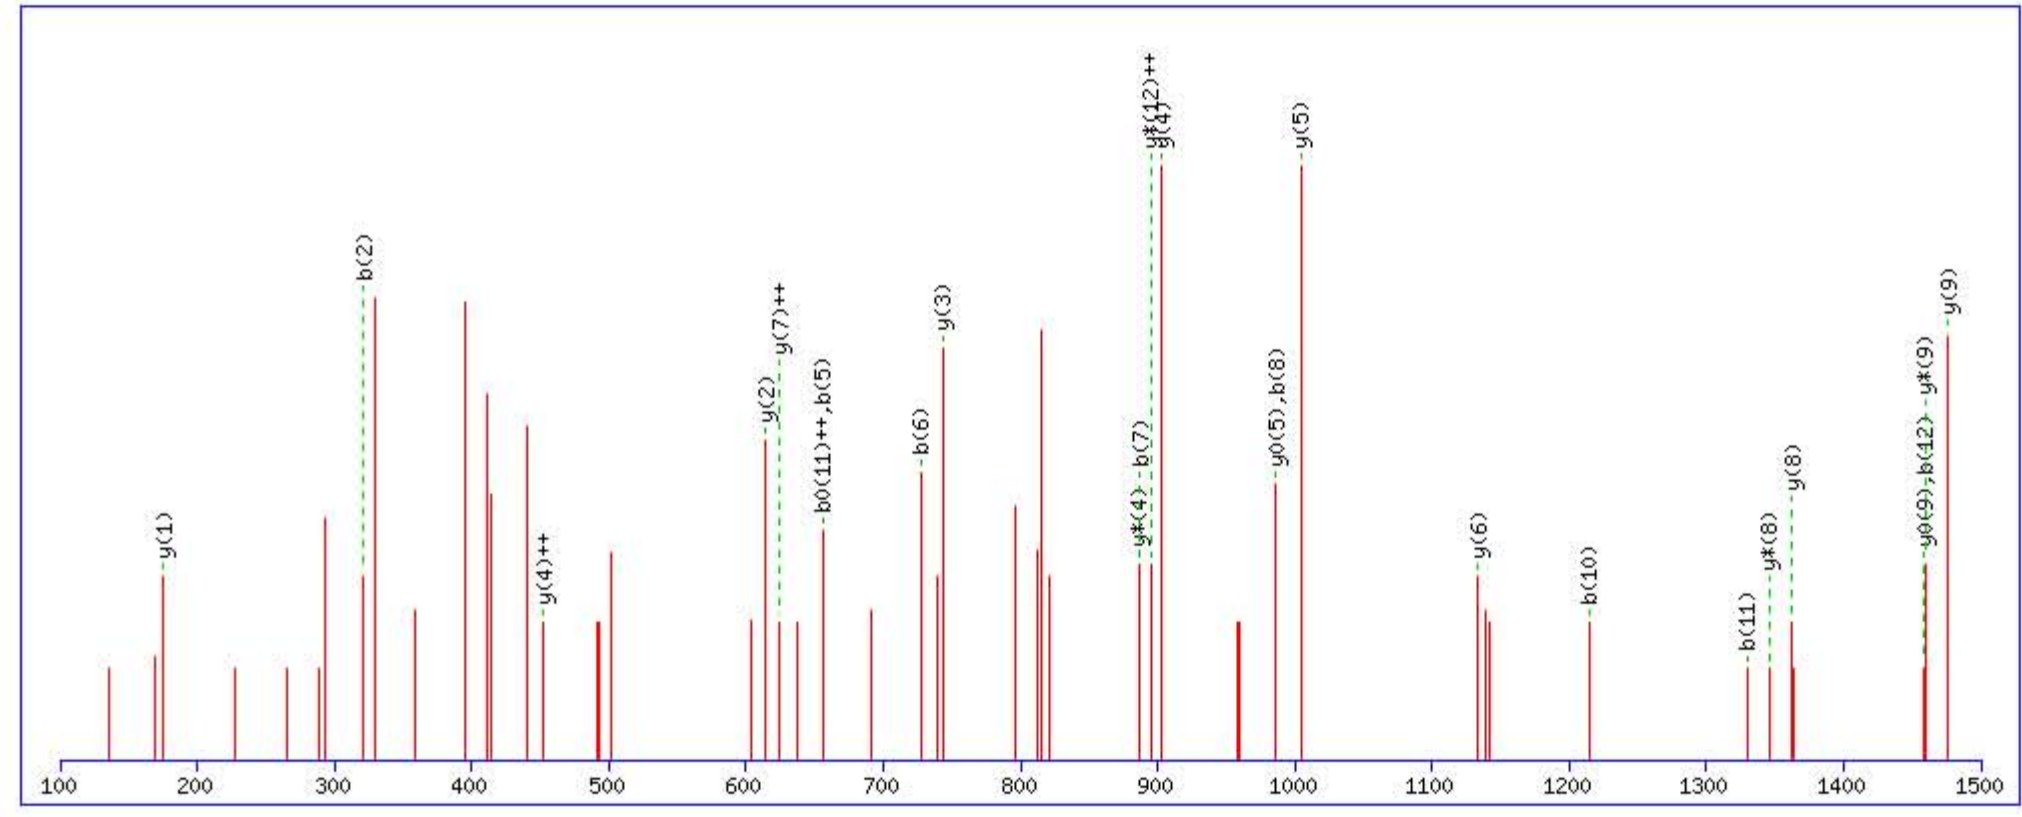

Monoisotopic mass of neutral peptide  $M_r(\text{calc})$ : 2460.922531  
 Fixed modifications: Carbamidomethyl (C) (apply to specified residues or termini only)  
 Variable modifications:  
 Q16 : Biotin:Thermo-21345 (Q)  
 Ions Score: 46 Expect: 2.3e-005  
 Matches : 25/166 fragment ions using 46 most intense peaks ([help](#))

| #  | b                  | b <sup>++</sup> | b <sup>*</sup> | b <sup>*++</sup> | b <sup>0</sup> | b <sup>0++</sup>  | Seq. | y                  | y <sup>++</sup>   | y <sup>*</sup>     | y <sup>*++</sup>  | y <sup>0</sup>     | y <sup>0++</sup> | #  |
|----|--------------------|-----------------|----------------|------------------|----------------|-------------------|------|--------------------|-------------------|--------------------|-------------------|--------------------|------------------|----|
| 1  | 161.037925         | 81.022600       |                |                  |                |                   | C    |                    |                   |                    |                   |                    |                  | 17 |
| 2  | <b>321.068574</b>  | 161.037925      |                |                  |                |                   | C    | 2301.899151        | 1151.453213       | 2284.872602        | 1142.939939       | 2283.888586        | 1142.447931      | 16 |
| 3  | 484.131903         | 242.569590      |                |                  |                |                   | Y    | 2141.868502        | 1071.437889       | 2124.841953        | 1062.924614       | 2123.857937        | 1062.432606      | 15 |
| 4  | 599.158846         | 300.083061      |                |                  | 581.148281     | 291.077779        | D    | 1978.805173        | 989.906225        | 1961.778624        | 981.392950        | 1960.794608        | 980.900942       | 14 |
| 5  | <b>656.180310</b>  | 328.593793      |                |                  | 638.169745     | 319.588511        | G    | 1863.778230        | 932.392753        | 1846.751681        | 923.879479        | 1845.767665        | 923.387471       | 13 |
| 6  | <b>727.217424</b>  | 364.112350      |                |                  | 709.206859     | 355.107068        | A    | 1806.756766        | 903.882021        | 1789.730217        | <b>895.368747</b> | 1788.746201        | 894.876739       | 12 |
| 7  | <b>887.248073</b>  | 444.127675      |                |                  | 869.237508     | 435.122392        | C    | 1735.719652        | 868.363464        | 1718.693103        | 859.850190        | 1717.709087        | 859.358182       | 11 |
| 8  | <b>986.316487</b>  | 493.661882      |                |                  | 968.305922     | 484.656599        | V    | 1575.689003        | 788.348140        | 1558.662454        | 779.834865        | 1557.678438        | 779.342857       | 10 |
| 9  | 1100.359414        | 550.683345      | 1083.332865    | 542.170071       | 1082.348849    | 541.678063        | N    | <b>1476.620589</b> | 738.813933        | <b>1459.594040</b> | 730.300658        | <b>1458.610024</b> | 729.808650       | 9  |
| 10 | <b>1214.402341</b> | 607.704809      | 1197.375792    | 599.191534       | 1196.391776    | 598.699526        | N    | <b>1362.577662</b> | 681.792469        | <b>1345.551113</b> | 673.279195        | 1344.567097        | 672.787187       | 8  |
| 11 | <b>1329.429284</b> | 665.218280      | 1312.402735    | 656.705006       | 1311.418719    | <b>656.212998</b> | D    | 1248.534735        | <b>624.771006</b> | 1231.508186        | 616.257731        | 1230.524170        | 615.765723       | 7  |
| 12 | <b>1458.471877</b> | 729.739577      | 1441.445328    | 721.226302       | 1440.461312    | 720.734294        | E    | <b>1133.507792</b> | 567.257534        | 1116.481243        | 558.744260        | 1115.497227        | 558.252252       | 6  |
| 13 | 1559.519556        | 780.263416      | 1542.493007    | 771.750142       | 1541.508991    | 771.258134        | T    | <b>1004.465199</b> | 502.736238        | 987.438650         | 494.222963        | <b>986.454634</b>  | 493.730955       | 5  |
| 14 | 1719.550205        | 860.278741      | 1702.523656    | 851.765466       | 1701.539640    | 851.273458        | C    | <b>903.417520</b>  | <b>452.212398</b> | <b>886.390971</b>  | 443.699124        | 885.406955         | 443.207116       | 4  |
| 15 | 1848.592798        | 924.800037      | 1831.566249    | 916.286763       | 1830.582233    | 915.794755        | E    | <b>743.386871</b>  | 372.197074        | 726.360322         | 363.683799        | 725.376306         | 363.191791       | 3  |
| 16 | 2287.818124        | 1144.412700     | 2270.791575    | 1135.899426      | 2269.807559    | 1135.407418       | Q    | <b>614.344278</b>  | 307.675777        | 597.317729         | 299.162503        |                    |                  | 2  |
| 17 |                    |                 |                |                  |                |                   | R    | <b>175.118952</b>  | 88.063114         | 158.092403         | 79.549839         |                    |                  | 1  |

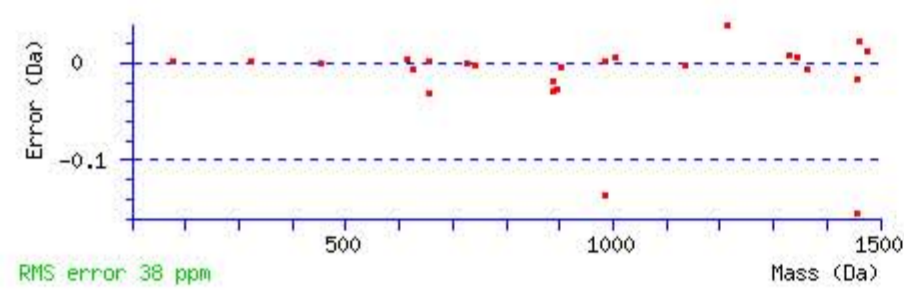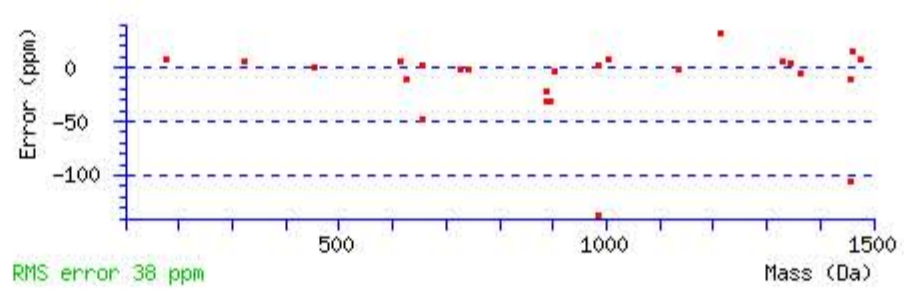

NCBI BLAST search of **CCYDGACVNNDTCEQR**  
 (Parameters: blastp, nr protein database, expect=20000, no filter, PAM30)  
 Other BLAST [web gateways](#)

**All matches to this query**

| Score | $M_r(\text{calc})$ : | Delta    | Sequence                         |
|-------|----------------------|----------|----------------------------------|
| 46.5  | 2460.922531          | 0.007901 | <a href="#">CCYDGACVNNDTCEQR</a> |

**MASCOT** Mascot Search Results

Peptide View

MS/MS Fragmentation of **MSAVEGICTSESPVIDHQGTK**  
 Found in **CO5\_HUMAN**, Complement C5 OS=Homo sapiens GN=C5 PE=1 SV=4

Match to Query 49061: 2556.195702 from(853.072510,3+) rtinseconds(1964) index(31596)  
 Title: Locus:1.1.1.3347.26 File:"2013-07-02 CLN FXIII 180 min 3rd F 3.wiff"  
 Data file C:\Program Files (x86)\Matrix Science\Mascot Daemon\mgf9 FXIII 180 min 3rd\mascot\_daemon\_merge.mgf

Click mouse within plot area to zoom in by factor of two about that point  
 Or, Plot from  to  Da   
 Label all possible matches  Label matches used for scoring

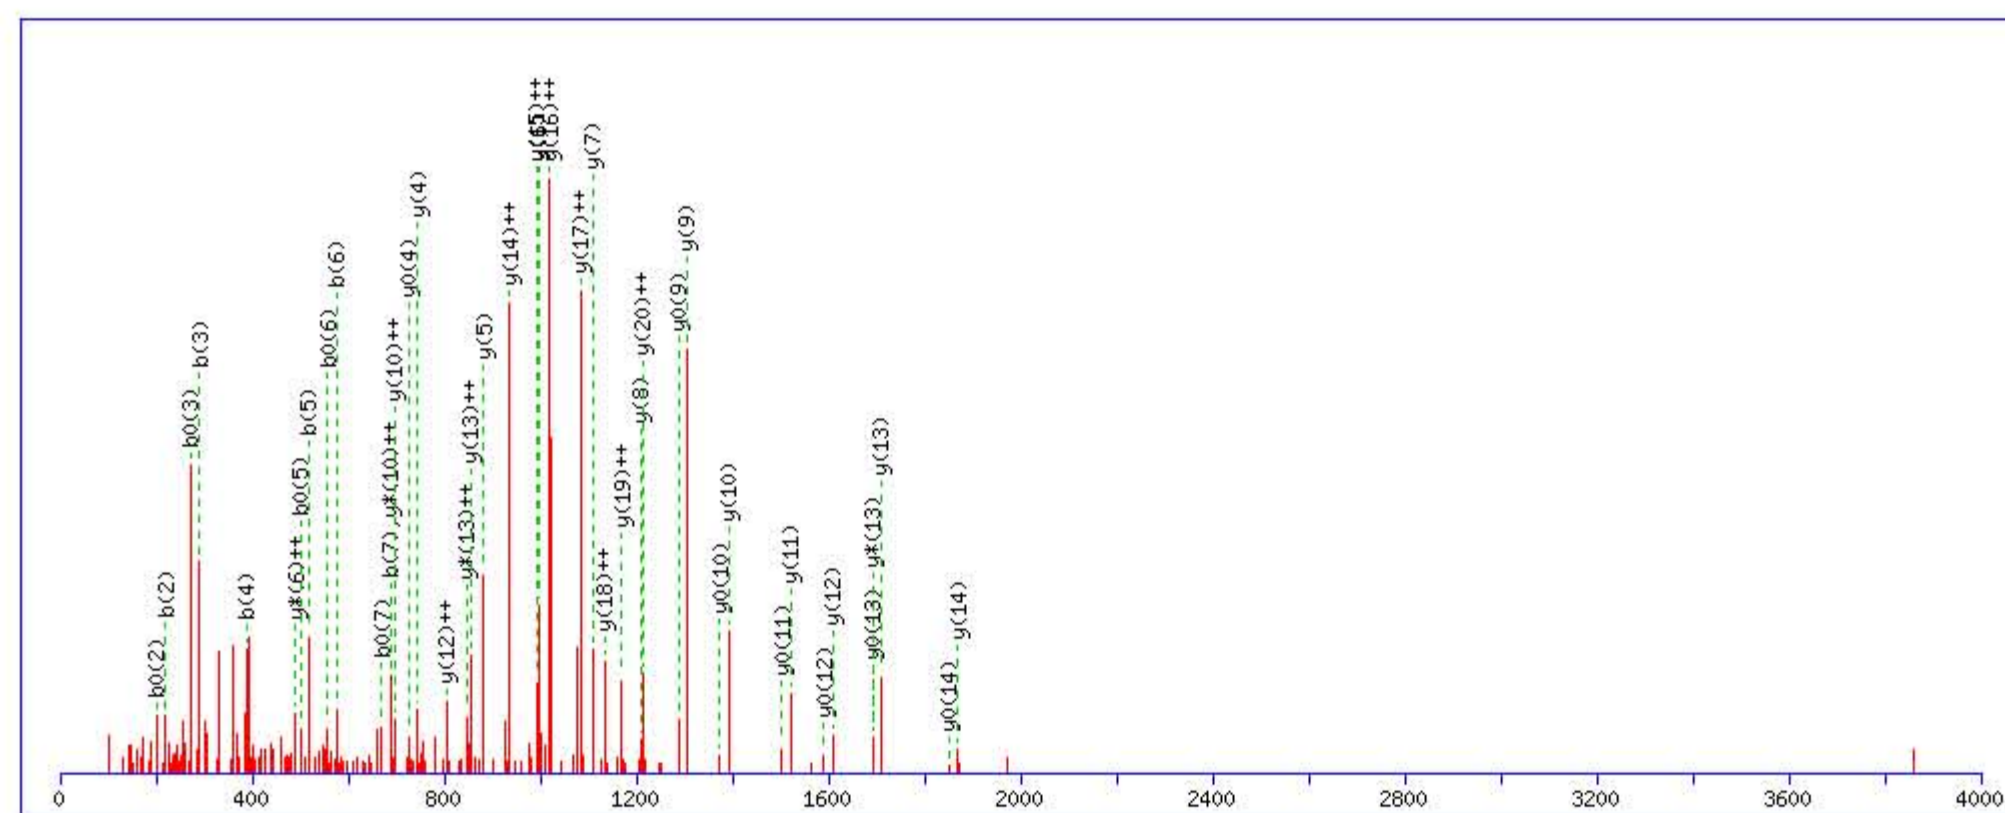

Monoisotopic mass of neutral peptide  $M_r(\text{calc})$ : 2556.202240  
 Fixed modifications: Carbamidomethyl (C) (apply to specified residues or termini only)  
 Variable modifications:  
 Q18 : Biotin:Thermo-21345 (Q)  
 Ions Score: 83 Expect: 2.2e-008  
 Matches : 43/202 fragment ions using 65 most intense peaks [\(help\)](#)

| #  | b           | b <sup>++</sup> | b*          | b <sup>+++</sup> | b <sup>0</sup> | b <sup>0++</sup> | Seq. | y           | y <sup>++</sup> | y*          | y <sup>+++</sup> | y <sup>0</sup> | y <sup>0++</sup> | #  |
|----|-------------|-----------------|-------------|------------------|----------------|------------------|------|-------------|-----------------|-------------|------------------|----------------|------------------|----|
| 1  | 132.047761  | 66.527518       |             |                  |                |                  | M    |             |                 |             |                  |                |                  | 21 |
| 2  | 219.079789  | 110.043532      |             |                  | 201.069224     | 101.038250       | S    | 2426.169024 | 1213.588150     | 2409.142475 | 1205.074875      | 2408.158459    | 1204.582867      | 20 |
| 3  | 290.116903  | 145.562089      |             |                  | 272.106338     | 136.556807       | A    | 2339.136996 | 1170.072136     | 2322.110447 | 1161.558861      | 2321.126431    | 1161.066853      | 19 |
| 4  | 389.185317  | 195.096296      |             |                  | 371.174752     | 186.091014       | V    | 2268.099882 | 1134.553579     | 2251.073333 | 1126.040304      | 2250.089317    | 1125.548296      | 18 |
| 5  | 518.227910  | 259.617593      |             |                  | 500.217345     | 250.612311       | E    | 2169.031468 | 1085.019372     | 2152.004919 | 1076.506097      | 2151.020903    | 1076.014089      | 17 |
| 6  | 575.249374  | 288.128325      |             |                  | 557.238809     | 279.123043       | G    | 2039.988875 | 1020.498076     | 2022.962326 | 1011.984801      | 2021.978310    | 1011.492793      | 16 |
| 7  | 688.333438  | 344.670357      |             |                  | 670.322873     | 335.665075       | I    | 1982.967411 | 991.987343      | 1965.940862 | 983.474069       | 1964.956846    | 982.982061       | 15 |
| 8  | 848.364087  | 424.685682      |             |                  | 830.353522     | 415.680399       | C    | 1869.883347 | 935.445312      | 1852.856798 | 926.932037       | 1851.872782    | 926.440029       | 14 |
| 9  | 949.411766  | 475.209521      |             |                  | 931.401201     | 466.204239       | T    | 1709.852698 | 855.429987      | 1692.826149 | 846.916713       | 1691.842133    | 846.424704       | 13 |
| 10 | 1036.443794 | 518.725535      |             |                  | 1018.433229    | 509.720253       | S    | 1608.805019 | 804.906147      | 1591.778470 | 796.392873       | 1590.794454    | 795.900865       | 12 |
| 11 | 1165.486387 | 583.246832      |             |                  | 1147.475822    | 574.241549       | E    | 1521.772991 | 761.390133      | 1504.746442 | 752.876859       | 1503.762426    | 752.384851       | 11 |
| 12 | 1252.518415 | 626.762846      |             |                  | 1234.507850    | 617.757563       | S    | 1392.730398 | 696.868837      | 1375.703849 | 688.355563       | 1374.719833    | 687.863554       | 10 |
| 13 | 1349.571179 | 675.289228      |             |                  | 1331.560614    | 666.283945       | P    | 1305.698370 | 653.352823      | 1288.671821 | 644.839548       | 1287.687805    | 644.347540       | 9  |
| 14 | 1448.639593 | 724.823435      |             |                  | 1430.629028    | 715.818152       | V    | 1208.645606 | 604.826441      | 1191.619057 | 596.313166       | 1190.635041    | 595.821158       | 8  |
| 15 | 1561.723657 | 781.365467      |             |                  | 1543.713092    | 772.360184       | I    | 1109.577192 | 555.292234      | 1092.550643 | 546.778959       | 1091.566627    | 546.286951       | 7  |
| 16 | 1676.750600 | 838.878938      |             |                  | 1658.740035    | 829.873656       | D    | 996.493128  | 498.750202      | 979.466579  | 490.236927       | 978.482563     | 489.744919       | 6  |
| 17 | 1813.809512 | 907.408394      |             |                  | 1795.798947    | 898.403112       | H    | 881.466185  | 441.236730      | 864.439636  | 432.723456       | 863.455620     | 432.231448       | 5  |
| 18 | 2253.034838 | 1127.021057     | 2236.008289 | 1118.507782      | 2235.024273    | 1118.015774      | Q    | 744.407273  | 372.707274      | 727.380724  | 364.194000       | 726.396708     | 363.701992       | 4  |
| 19 | 2310.056302 | 1155.531789     | 2293.029753 | 1147.018514      | 2292.045737    | 1146.526506      | G    | 305.181947  | 153.094611      | 288.155398  | 144.581337       | 287.171382     | 144.089329       | 3  |
| 20 | 2411.103981 | 1206.055628     | 2394.077432 | 1197.542354      | 2393.093416    | 1197.050346      | T    | 248.160483  | 124.583879      | 231.133934  | 116.070605       | 230.149918     | 115.578597       | 2  |
| 21 |             |                 |             |                  |                |                  | K    | 147.112804  | 74.060040       | 130.086255  | 65.546765        |                |                  | 1  |

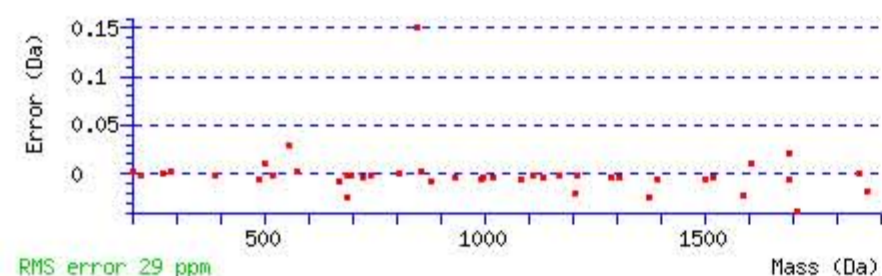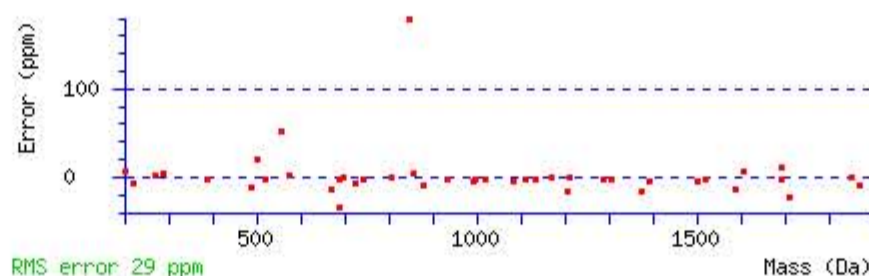

NCBI BLAST search of **MSAVEGICTSESPVIDHQGTK**  
 (Parameters: blastp, nr protein database, expect=20000, no filter, PAM30)  
 Other BLAST [web gateways](#)

All matches to this query

| Score | $M_r(\text{calc})$ : | Delta     | Sequence                               |
|-------|----------------------|-----------|----------------------------------------|
| 82.6  | 2556.202240          | -0.006538 | <a href="#">MSAVEGICTSESPVIDHQGTK</a>  |
| 1.0   | 2556.161118          | 0.034584  | <a href="#">EAADMILVDDDFQTMSAIEEGK</a> |



# MASCOT Search Results

## Peptide View

MS/MS Fragmentation of **QGDVECQR**

Found in **CO6\_HUMAN**, Complement component C6 OS=Homo sapiens GN=C6 PE=1 SV=3

Match to Query 20386: 1301.579668 from(651.797110,2+) rtinseconds(1375) index(15070)

Title: Locus:1.1.1.3044.6 File:"2013-07-02 CLN FXIII 180 min 3rd F 2.wiff"

Data file C:\Program Files (x86)\Matrix Science\Mascot Daemon\mgf\9 FXIII 180 min 3rd\mascot\_daemon\_merge.mgf

Click mouse within plot area to zoom in by factor of two about that point

Or, Plot from  to  Da

Label all possible matches  Label matches used for scoring

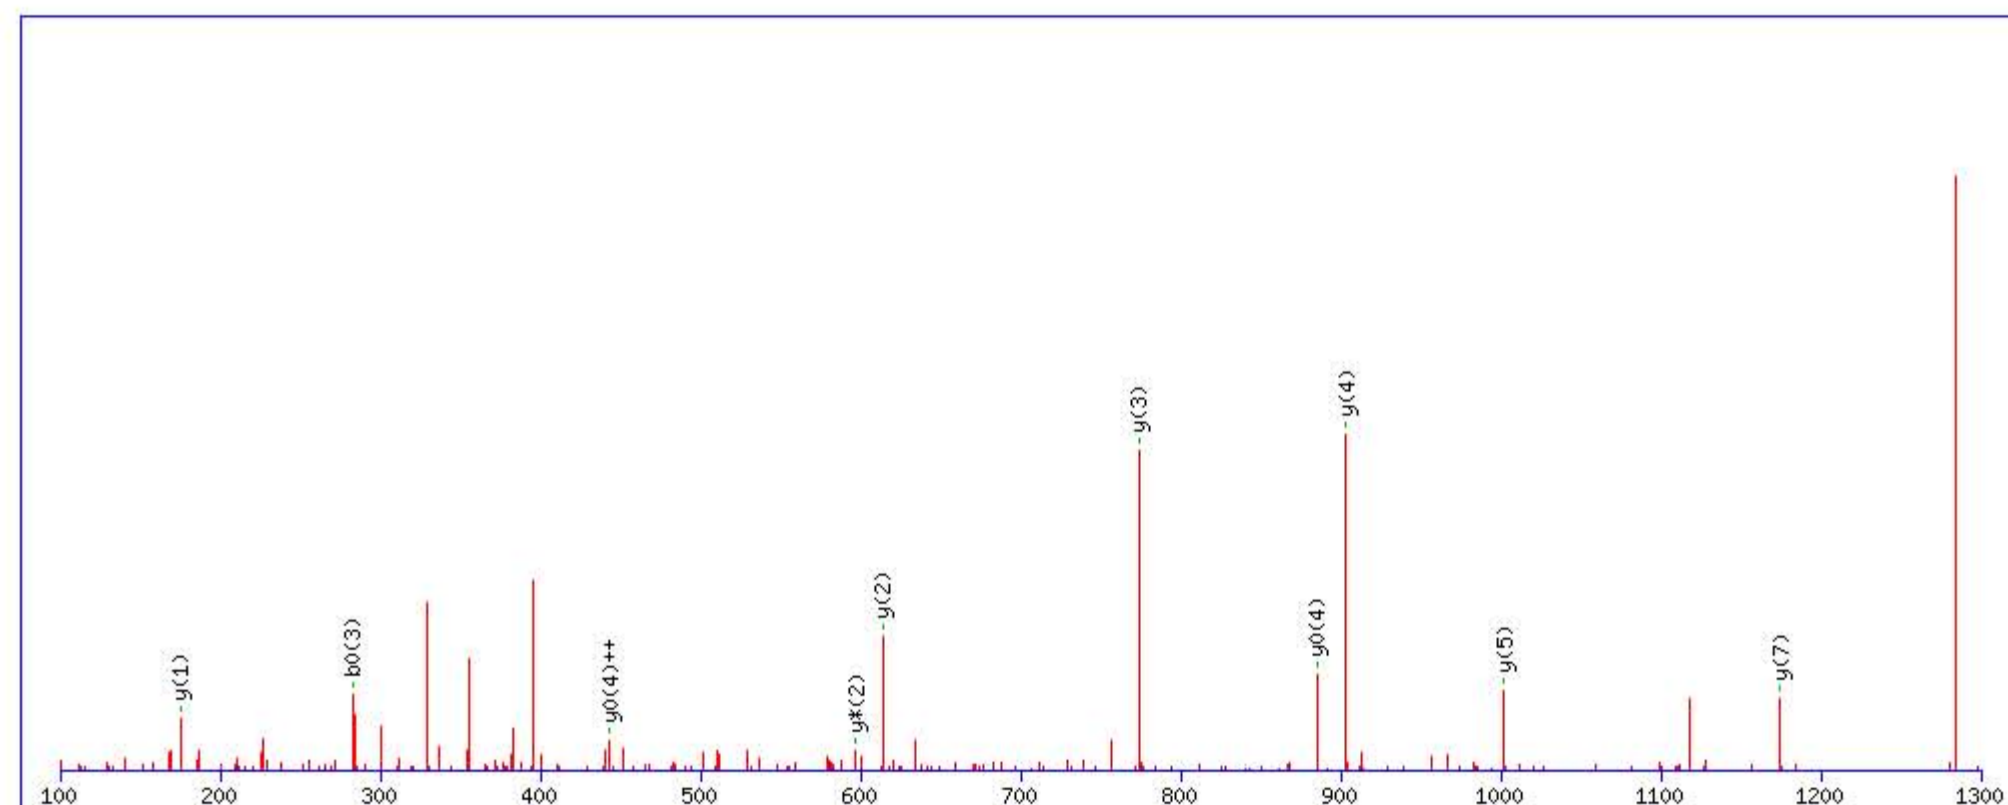

Monoisotopic mass of neutral peptide Mr(calc): 1301.585648

Fixed modifications: Carbamidomethyl (C) (apply to specified residues or termini only)

Variable modifications:

Q7 : Biotin:Thermo-21345 (Q)

Ions Score: 52 Expect: 2.7e-005

Matches : 10/74 fragment ions using 12 most intense peaks [\(help\)](#)

| # | b           | b <sup>++</sup> | b <sup>+</sup> | b <sup>*++</sup> | b <sup>0</sup>    | b <sup>0++</sup> | Seq. | y                  | y <sup>++</sup> | y <sup>+</sup>    | y <sup>*++</sup> | y <sup>0</sup>    | y <sup>0++</sup>  | # |
|---|-------------|-----------------|----------------|------------------|-------------------|------------------|------|--------------------|-----------------|-------------------|------------------|-------------------|-------------------|---|
| 1 | 129.065854  | 65.036565       | 112.039305     | 56.523291        |                   |                  | Q    |                    |                 |                   |                  |                   |                   | 8 |
| 2 | 186.087318  | 93.547297       | 169.060769     | 85.034023        |                   |                  | G    | <b>1174.534341</b> | 587.770809      | 1157.507792       | 579.257534       | 1156.523776       | 578.765526        | 7 |
| 3 | 301.114261  | 151.060768      | 284.087712     | 142.547494       | <b>283.103696</b> | 142.055486       | D    | 1117.512877        | 559.260077      | 1100.486328       | 550.746802       | 1099.502312       | 550.254794        | 6 |
| 4 | 400.182675  | 200.594976      | 383.156126     | 192.081701       | 382.172110        | 191.589693       | V    | <b>1002.485934</b> | 501.746605      | 985.459385        | 493.233331       | 984.475369        | 492.741323        | 5 |
| 5 | 529.225268  | 265.116272      | 512.198719     | 256.602998       | 511.214703        | 256.110990       | E    | <b>903.417520</b>  | 452.212398      | 886.390971        | 443.699124       | <b>885.406955</b> | <b>443.207116</b> | 4 |
| 6 | 689.255917  | 345.131597      | 672.229368     | 336.618322       | 671.245352        | 336.126314       | C    | <b>774.374927</b>  | 387.691102      | 757.348378        | 379.177827       |                   |                   | 3 |
| 7 | 1128.481243 | 564.744260      | 1111.454694    | 556.230985       | 1110.470678       | 555.738977       | Q    | <b>614.344278</b>  | 307.675777      | <b>597.317729</b> | 299.162503       |                   |                   | 2 |
| 8 |             |                 |                |                  |                   |                  | R    | <b>175.118952</b>  | 88.063114       | 158.092403        | 79.549839        |                   |                   | 1 |

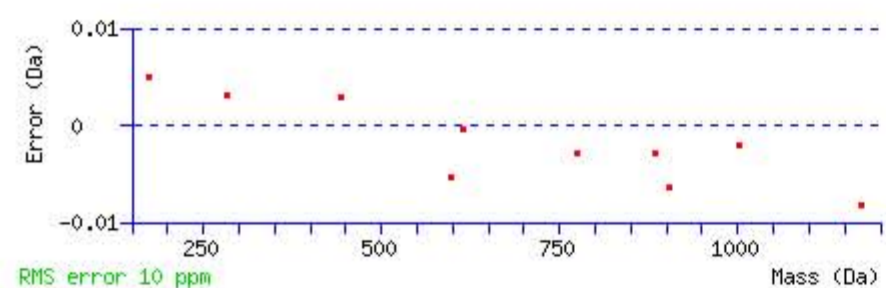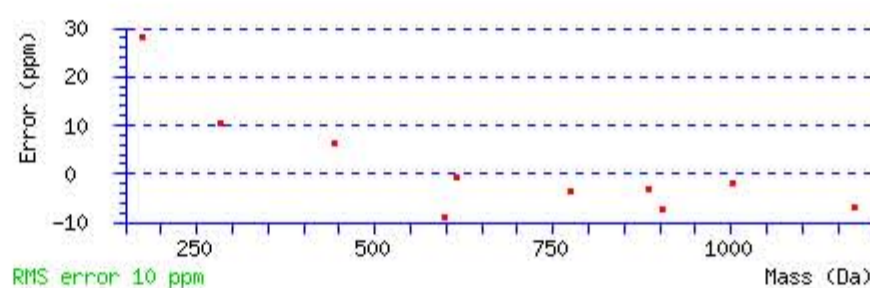

NCBI BLAST search of **QGDVECQR**

(Parameters: blastp, nr protein database, expect=20000, no filter, PAM30)

Other BLAST [web gateways](#)

All matches to this query

| Score | Mr(calc):   | Delta     | Sequence                      |
|-------|-------------|-----------|-------------------------------|
| 52.0  | 1301.585648 | -0.005980 | <a href="#">QGDVECQR</a>      |
| 8.1   | 1301.584747 | -0.005079 | <a href="#">QESPSQENIDR</a>   |
| 7.1   | 1301.584763 | -0.005095 | <a href="#">KATEDAEGGDGPR</a> |
| 4.5   | 1301.560471 | 0.019197  | <a href="#">QEPRCEAPCR</a>    |
| 2.1   | 1301.567001 | 0.012667  | <a href="#">RDQCEAPSDPK</a>   |

Mascot: <http://www.matrixscience.com/>

# MASCOT Search Results

## Peptide View

MS/MS Fragmentation of **TCNSGTQSR**

Found in **CO6\_HUMAN**, Complement component C6 OS=Homo sapiens GN=C6 PE=1 SV=3

Match to Query 20677: 1320.585268 from(661.299910,2+) rtinseconds(1132) index(14125)

Title: Locus:1.1.1.2959.10 File:"2013-07-02 CLN FXIII 180 min 3rd F 2.wiff"

Data file C:\Program Files (x86)\Matrix Science\Mascot Daemon\mgf\9 FXIII 180 min 3rd\mascot\_daemon\_merge.mgf

Click mouse within plot area to zoom in by factor of two about that point

Or, Plot from  to  Da

Label all possible matches  Label matches used for scoring

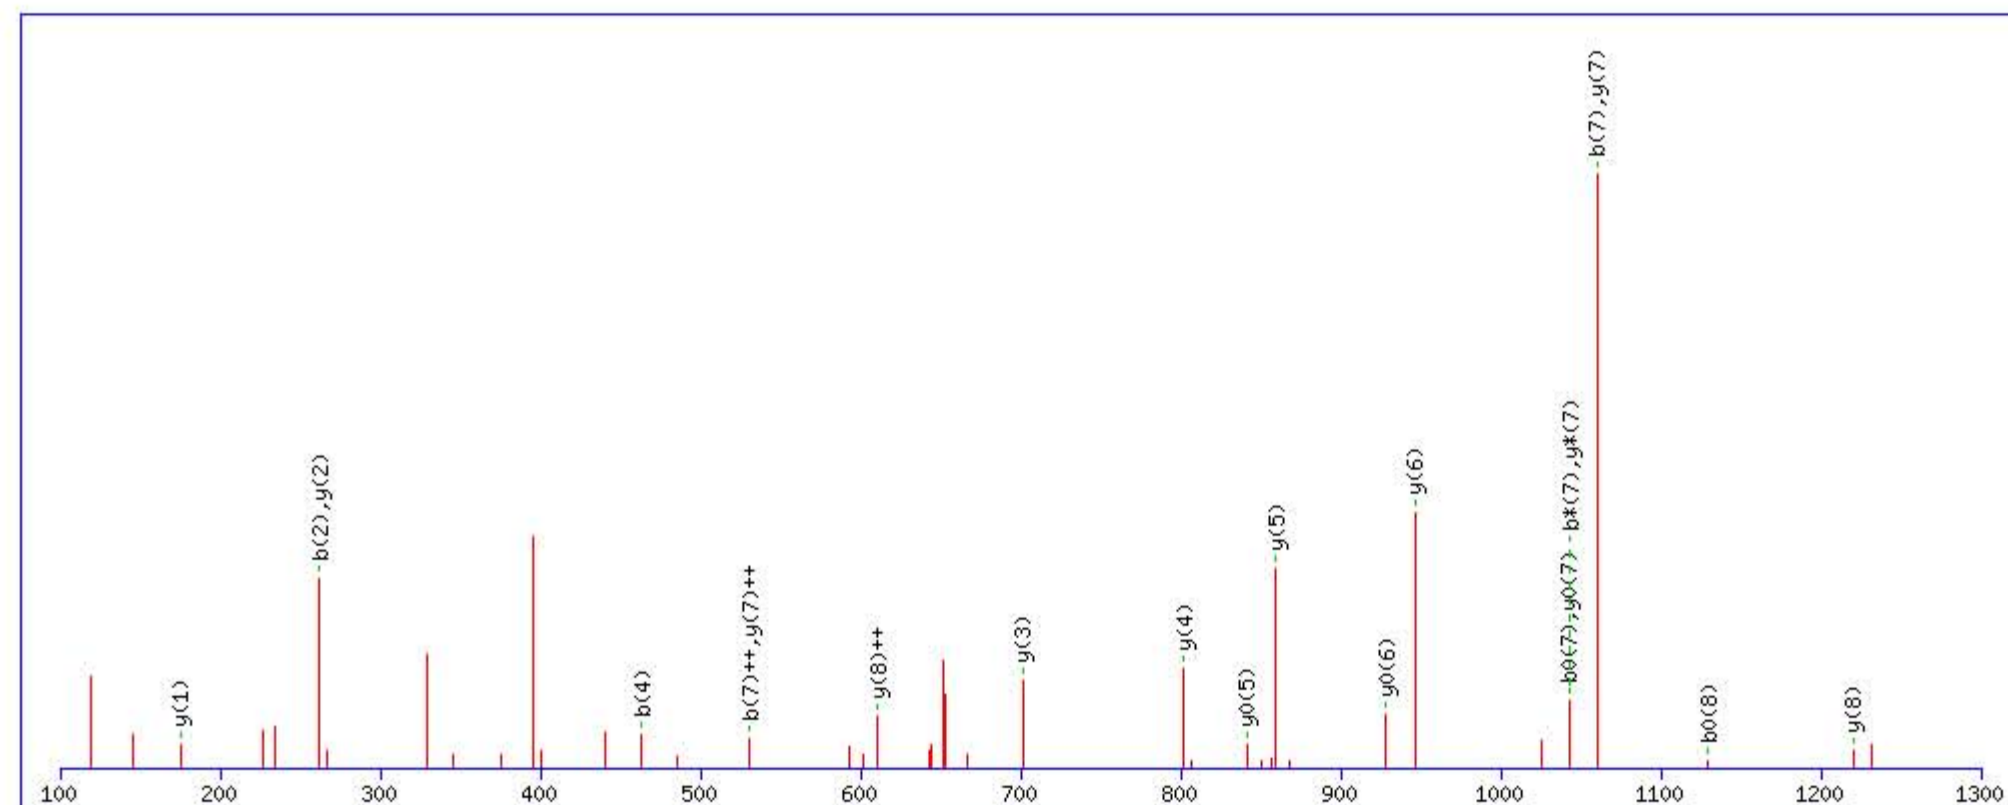

Monoisotopic mass of neutral peptide Mr(calc): 1320.591461

Fixed modifications: Carbamidomethyl (C) (apply to specified residues or termini only)

Variable modifications:

Q7 : Biotin:Thermo-21345 (Q)

Ions Score: 55 Expect: 1.8e-005

Matches : 21/90 fragment ions using 31 most intense peaks ([help](#))

| # | b                  | b <sup>++</sup>   | b <sup>*</sup>     | b <sup>*++</sup> | b <sup>0</sup>     | b <sup>0++</sup> | Seq. | y                  | y <sup>++</sup>   | y <sup>*</sup>     | y <sup>*++</sup> | y <sup>0</sup>     | y <sup>0++</sup> | # |
|---|--------------------|-------------------|--------------------|------------------|--------------------|------------------|------|--------------------|-------------------|--------------------|------------------|--------------------|------------------|---|
| 1 | 102.054955         | 51.531116         |                    |                  | 84.044390          | 42.525833        | T    |                    |                   |                    |                  |                    |                  | 9 |
| 2 | <b>262.085604</b>  | 131.546440        |                    |                  | 244.075039         | 122.541158       | C    | <b>1220.551053</b> | <b>610.779165</b> | 1203.524504        | 602.265890       | 1202.540488        | 601.773882       | 8 |
| 3 | 376.128531         | 188.567904        | 359.101982         | 180.054629       | 358.117966         | 179.562621       | N    | <b>1060.520404</b> | <b>530.763840</b> | <b>1043.493855</b> | 522.250566       | <b>1042.509839</b> | 521.758558       | 7 |
| 4 | <b>463.160559</b>  | 232.083917        | 446.134010         | 223.570643       | 445.149994         | 223.078635       | S    | <b>946.477477</b>  | 473.742377        | 929.450928         | 465.229102       | <b>928.466912</b>  | 464.737094       | 6 |
| 5 | 520.182023         | 260.594650        | 503.155474         | 252.081375       | 502.171458         | 251.589367       | G    | <b>859.445449</b>  | 430.226363        | 842.418900         | 421.713088       | <b>841.434884</b>  | 421.221080       | 5 |
| 6 | 621.229702         | 311.118489        | 604.203153         | 302.605215       | 603.219137         | 302.113207       | T    | <b>802.423985</b>  | 401.715631        | 785.397436         | 393.202356       | 784.413420         | 392.710348       | 4 |
| 7 | <b>1060.455028</b> | <b>530.731152</b> | <b>1043.428479</b> | 522.217878       | <b>1042.444463</b> | 521.725870       | Q    | <b>701.376306</b>  | 351.191791        | 684.349757         | 342.678517       | 683.365741         | 342.186509       | 3 |
| 8 | 1147.487056        | 574.247166        | 1130.460507        | 565.733892       | <b>1129.476491</b> | 565.241884       | S    | <b>262.150980</b>  | 131.579128        | 245.124431         | 123.065854       | 244.140415         | 122.573846       | 2 |
| 9 |                    |                   |                    |                  |                    |                  | R    | <b>175.118952</b>  | 88.063114         | 158.092403         | 79.549839        |                    |                  | 1 |

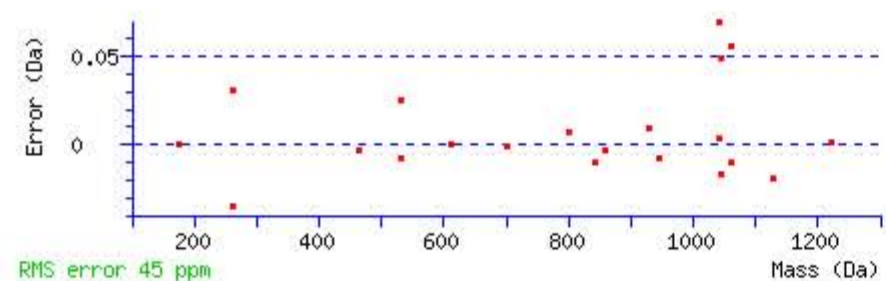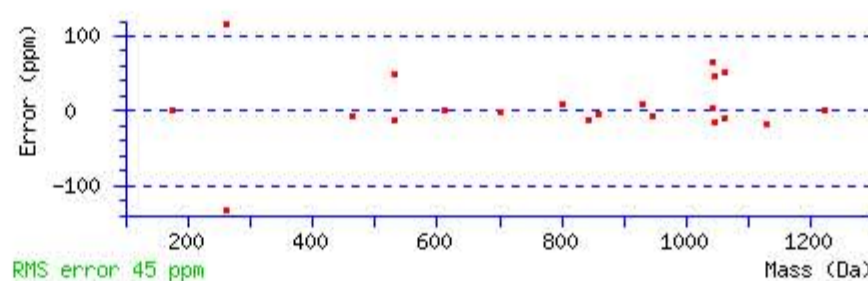

NCBI BLAST search of **TCNSGTQSR**

(Parameters: blastp, nr protein database, expect=20000, no filter, PAM30)

Other BLAST [web gateways](#)

All matches to this query

| Score | Mr(calc):   | Delta     | Sequence                     |
|-------|-------------|-----------|------------------------------|
| 55.2  | 1320.591461 | -0.006193 | <a href="#">TCNSGTQSR</a>    |
| 11.9  | 1320.599289 | -0.014021 | <a href="#">NELPMHHN SSR</a> |
| 4.2   | 1320.584045 | 0.001223  | <a href="#">SQGCSREASPSR</a> |
| 3.0   | 1320.597946 | -0.012678 | <a href="#">LMNTNDLEESR</a>  |
| 2.1   | 1320.570984 | 0.014284  | <a href="#">MNWFGSNFFR</a>   |

# MASCOT SEARCH RESULTS

## Peptide View

MS/MS Fragmentation of **QLEWGLER**

Found in **CO6\_HUMAN**, Complement component C6 OS=Homo sapiens GN=C6 PE=1 SV=3

Match to Query 21145: 1340.687588 from(671.351070,2+) rtinseconds(2257) index(33403)

Title: Locus:1.1.1.3449.18 File:"2013-07-02 CLN FXIII 180 min 3rd F 3.wiff"

Data file C:\Program Files (x86)\Matrix Science\Mascot Daemon\mgf9 FXIII 180 min 3rd\mascot\_daemon\_merge.mgf

Click mouse within plot area to zoom in by factor of two about that point

Or, Plot from  to  Da

Label all possible matches  Label matches used for scoring

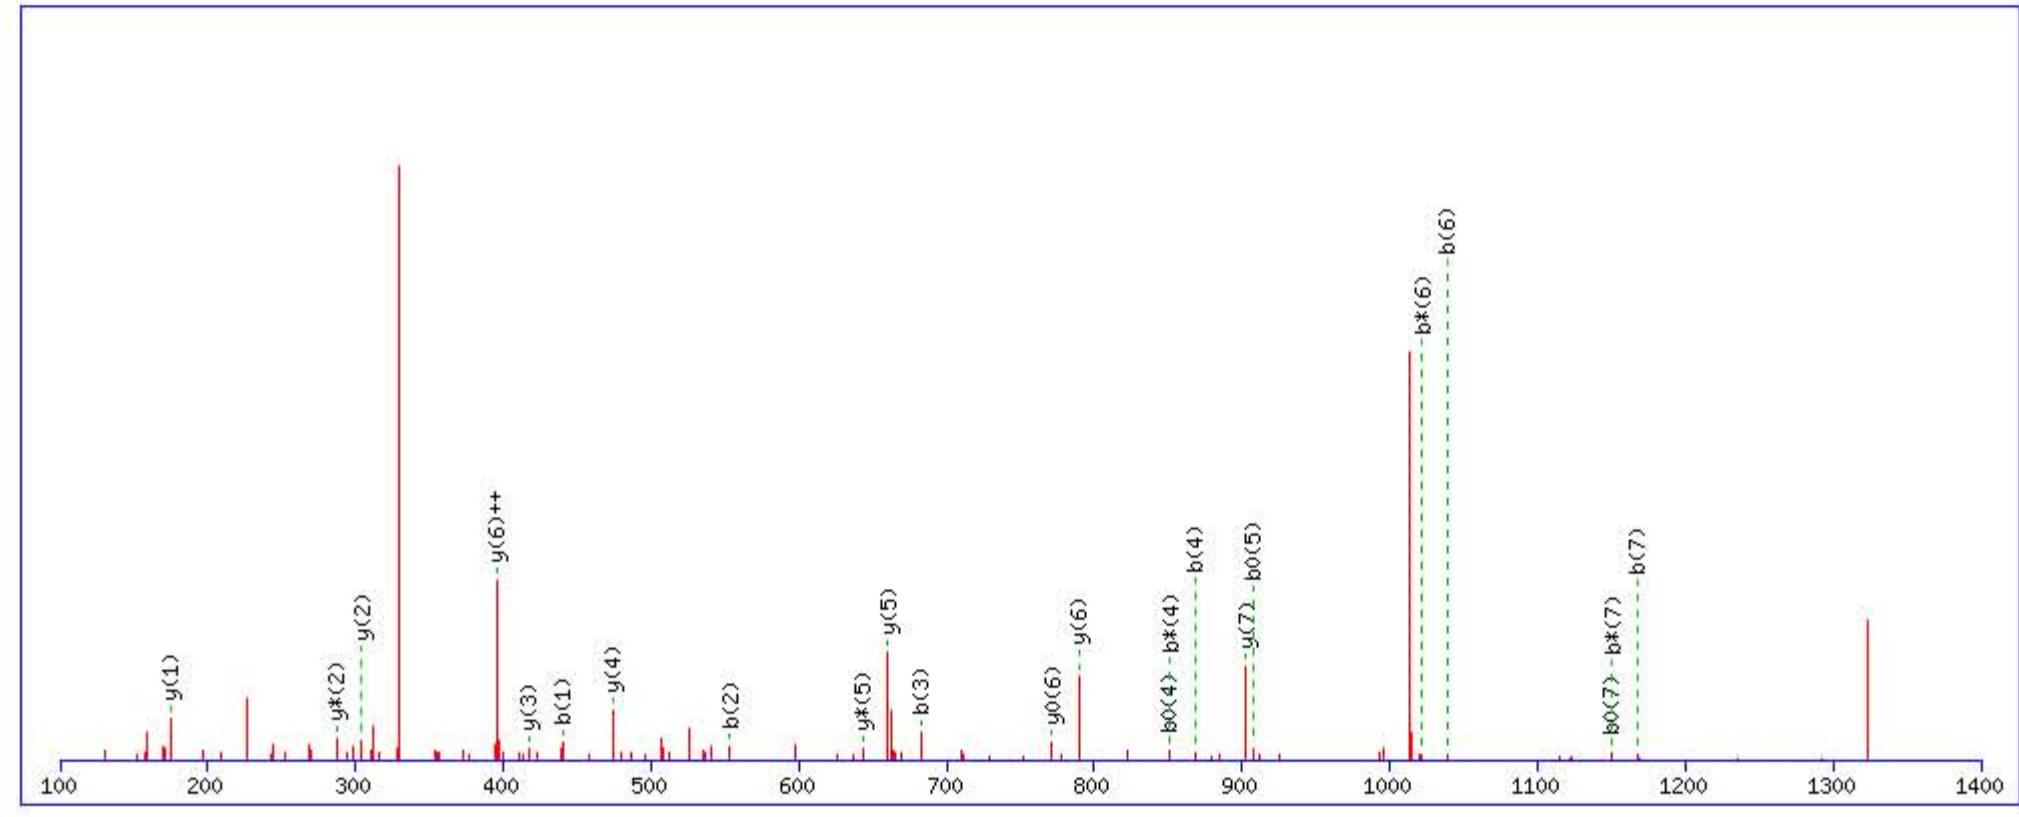

Monoisotopic mass of neutral peptide Mr(calc): 1340.691071

Fixed modifications: Carbamidomethyl (C) (apply to specified residues or termini only)

Variable modifications:

Q1 : Biotin:Thermo-21345 (Q)

Ions Score: 27 Expect: 0.032

Matches : 23/78 fragment ions using 56 most intense peaks [\(help\)](#)

| # | b           | b <sup>++</sup> | b <sup>*</sup> | b <sup>*++</sup> | b <sup>0</sup> | b <sup>0++</sup> | Seq. | y          | y <sup>++</sup> | y <sup>*</sup> | y <sup>*++</sup> | y <sup>0</sup> | y <sup>0++</sup> | # |
|---|-------------|-----------------|----------------|------------------|----------------|------------------|------|------------|-----------------|----------------|------------------|----------------|------------------|---|
| 1 | 440.232602  | 220.619939      | 423.206053     | 212.106664       |                |                  | Q    |            |                 |                |                  |                |                  | 8 |
| 2 | 553.316666  | 277.161971      | 536.290117     | 268.648697       |                |                  | L    | 902.473043 | 451.740160      | 885.446494     | 443.226885       | 884.462478     | 442.734877       | 7 |
| 3 | 682.359259  | 341.683268      | 665.332710     | 333.169993       | 664.348694     | 332.677985       | E    | 789.388979 | 395.198128      | 772.362430     | 386.684853       | 771.378414     | 386.192845       | 6 |
| 4 | 868.438572  | 434.722924      | 851.412023     | 426.209650       | 850.428007     | 425.717642       | W    | 660.346386 | 330.676831      | 643.319837     | 322.163556       | 642.335821     | 321.671548       | 5 |
| 5 | 925.460036  | 463.233656      | 908.433487     | 454.720382       | 907.449471     | 454.228374       | G    | 474.267073 | 237.637174      | 457.240524     | 229.123900       | 456.256508     | 228.631892       | 4 |
| 6 | 1038.544100 | 519.775688      | 1021.517551    | 511.262414       | 1020.533535    | 510.770406       | L    | 417.245609 | 209.126442      | 400.219060     | 200.613168       | 399.235044     | 200.121160       | 3 |
| 7 | 1167.586693 | 584.296985      | 1150.560144    | 575.783710       | 1149.576128    | 575.291702       | E    | 304.161545 | 152.584410      | 287.134996     | 144.071136       | 286.150980     | 143.579128       | 2 |
| 8 |             |                 |                |                  |                |                  | R    | 175.118952 | 88.063114       | 158.092403     | 79.549839        |                |                  | 1 |

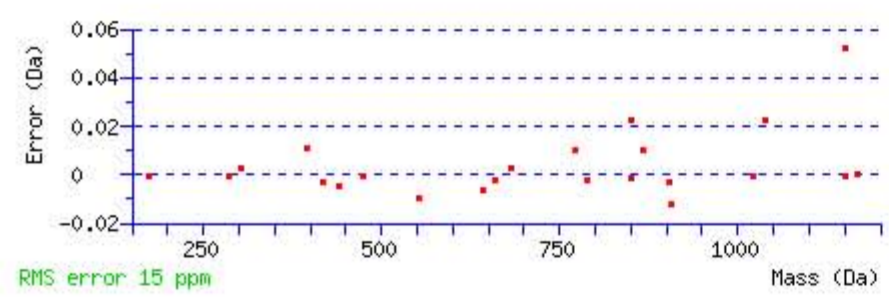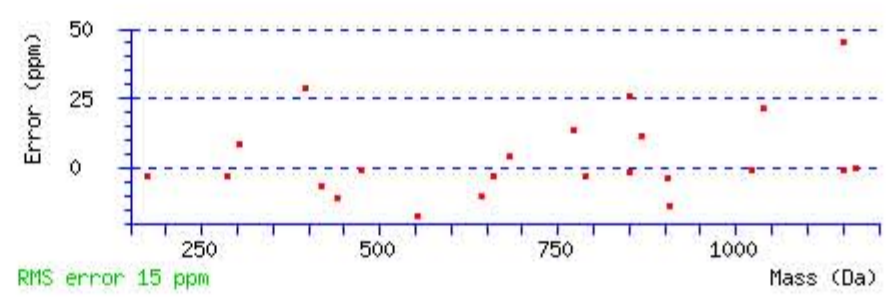

NCBI BLAST search of **QLEWGLER**

(Parameters: blastp, nr protein database, expect=20000, no filter, PAM30)

Other BLAST [web gateways](#)

### All matches to this query

| Score | Mr(calc):   | Delta     | Sequence                     |
|-------|-------------|-----------|------------------------------|
| 26.8  | 1340.691071 | -0.003483 | <a href="#">QLEWGLER</a>     |
| 10.2  | 1340.668427 | 0.019161  | <a href="#">SELGGTDLEKHR</a> |
| 9.5   | 1340.675812 | 0.011776  | <a href="#">QLQDELER</a>     |
| 7.9   | 1340.675812 | 0.011776  | <a href="#">LQEGEGIR</a>     |
| 4.9   | 1340.687027 | 0.000561  | <a href="#">QLREEAER</a>     |
| 3.9   | 1340.704834 | -0.017246 | <a href="#">LTLNDSSVTVHR</a> |
| 3.1   | 1340.694916 | -0.007328 | <a href="#">RNGLEPVTYHR</a>  |
| 3.1   | 1340.675812 | 0.011776  | <a href="#">QVELQEER</a>     |
| 2.8   | 1340.687042 | 0.000546  | <a href="#">QINDSANLR</a>    |
| 2.4   | 1340.687042 | 0.000546  | <a href="#">ALGSAAADAQR</a>  |

# **MASCOT** Mascot Search Results

## Peptide View

MS/MS Fragmentation of **ECNNPAPQR**

Found in **CO6\_HUMAN**, Complement component C6 OS=Homo sapiens GN=C6 PE=1 SV=3

Match to Query 23508: 1395.637422 from(466.219750,3+) rtinseconds(1333) index(14883)

Title: Locus:1.1.1.3030.5 File:"2013-07-02 CLN FXIII 180 min 3rd F 2.wiff"

Data file C:\Program Files (x86)\Matrix Science\Mascot Daemon\mgf\9 FXIII 180 min 3rd\mascot\_daemon\_merge.mgf

Click mouse within plot area to zoom in by factor of two about that point

Or, Plot from  to  Da

Label all possible matches  Label matches used for scoring

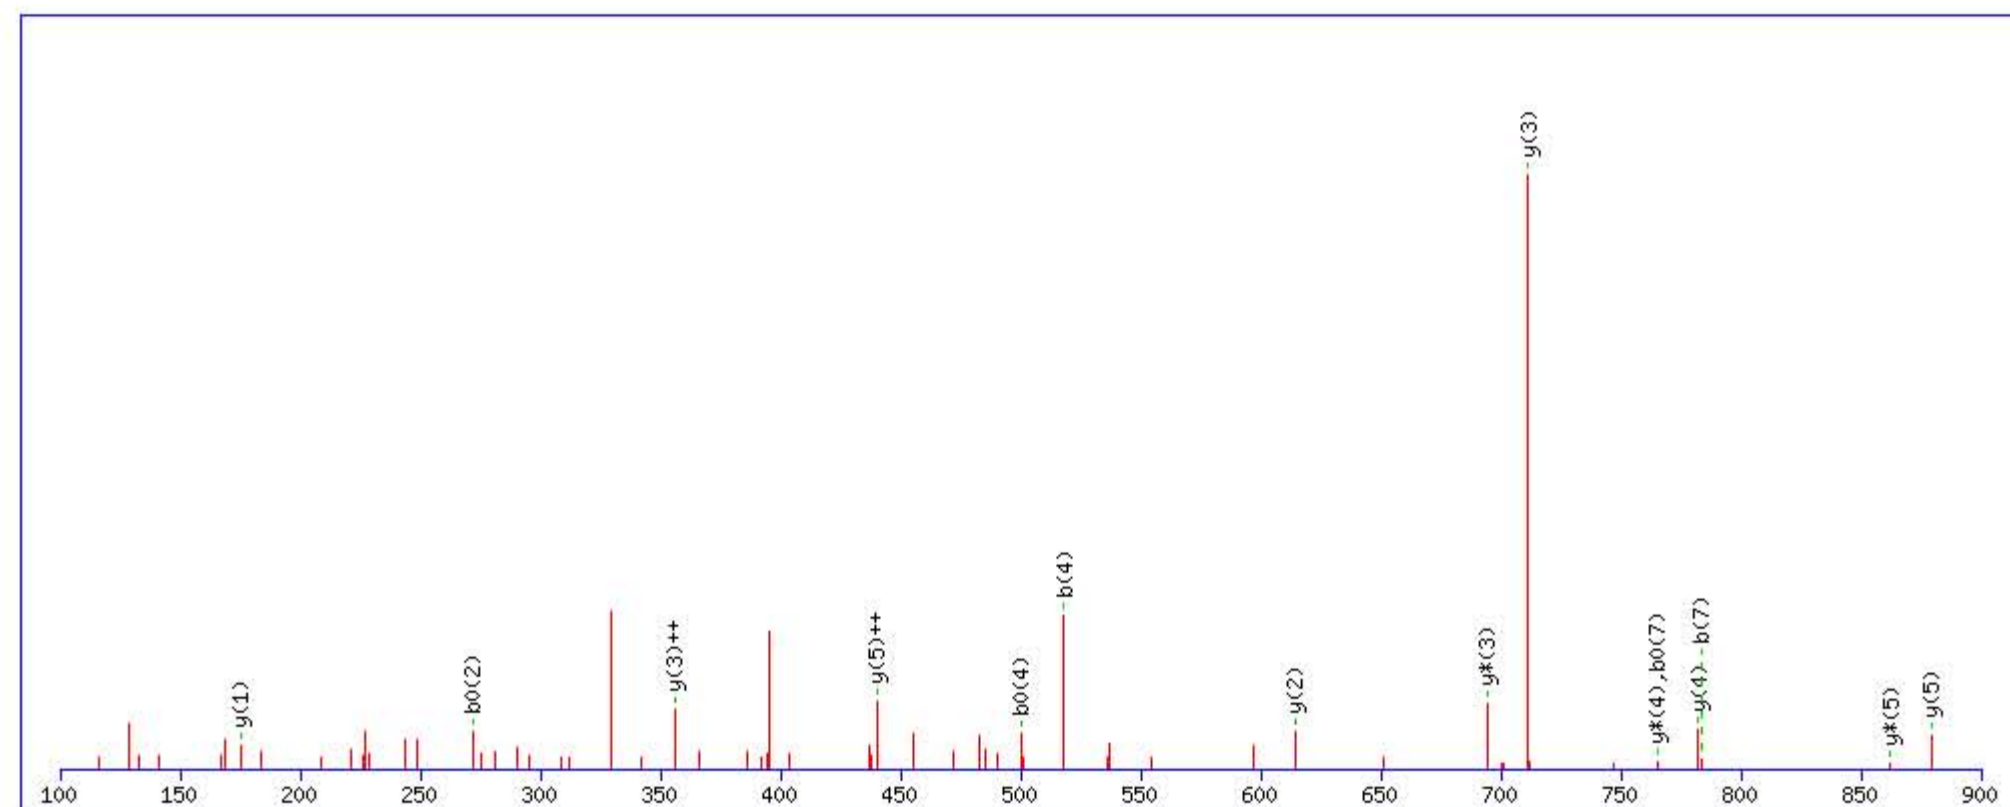

Monoisotopic mass of neutral peptide **Mr(calc)**: 1395.638718

Fixed modifications: Carbamidomethyl (C) (apply to specified residues or termini only)

Variable modifications:

Q8 : Biotin:Thermo-21345 (Q)

Ions Score: 27 Expect: 0.0043

Matches : 15/76 fragment ions using 23 most intense peaks [\(help\)](#)

| # | b           | b <sup>++</sup> | b <sup>*</sup> | b <sup>*++</sup> | b <sup>0</sup> | b <sup>0++</sup> | Seq. | y           | y <sup>++</sup> | y <sup>*</sup> | y <sup>*++</sup> | # |
|---|-------------|-----------------|----------------|------------------|----------------|------------------|------|-------------|-----------------|----------------|------------------|---|
| 1 | 130.049869  | 65.528572       |                |                  | 112.039304     | 56.523290        | E    |             |                 |                |                  | 9 |
| 2 | 290.080518  | 145.543897      |                |                  | 272.069953     | 136.538615       | C    | 1267.603423 | 634.305350      | 1250.576874    | 625.792075       | 8 |
| 3 | 404.123445  | 202.565361      | 387.096896     | 194.052086       | 386.112880     | 193.560078       | N    | 1107.572774 | 554.290025      | 1090.546225    | 545.776751       | 7 |
| 4 | 518.166372  | 259.586824      | 501.139823     | 251.073550       | 500.155807     | 250.581542       | N    | 993.529847  | 497.268562      | 976.503298     | 488.755287       | 6 |
| 5 | 615.219136  | 308.113206      | 598.192587     | 299.599932       | 597.208571     | 299.107924       | P    | 879.486920  | 440.247098      | 862.460371     | 431.733824       | 5 |
| 6 | 686.256250  | 343.631763      | 669.229701     | 335.118489       | 668.245685     | 334.626481       | A    | 782.434156  | 391.720716      | 765.407607     | 383.207442       | 4 |
| 7 | 783.309014  | 392.158145      | 766.282465     | 383.644871       | 765.298449     | 383.152863       | P    | 711.397042  | 356.202159      | 694.370493     | 347.688885       | 3 |
| 8 | 1222.534340 | 611.770808      | 1205.507791    | 603.257534       | 1204.523775    | 602.765526       | Q    | 614.344278  | 307.675777      | 597.317729     | 299.162503       | 2 |
| 9 |             |                 |                |                  |                |                  | R    | 175.118952  | 88.063114       | 158.092403     | 79.549839        | 1 |

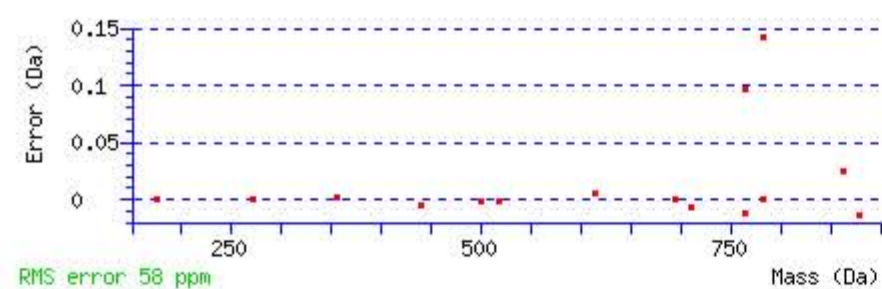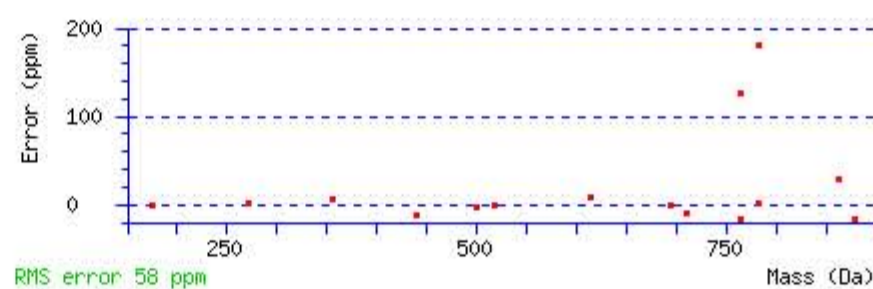

NCBI BLAST search of **ECNNPAPQR**

(Parameters: blastp, nr protein database, expect=20000, no filter, PAM30)

Other BLAST [web gateways](#)

All matches to this query

| Score | Mr(calc):   | Delta     | Sequence                     |
|-------|-------------|-----------|------------------------------|
| 27.4  | 1395.638718 | -0.001296 | <a href="#">ECNNPAPQR</a>    |
| 2.0   | 1395.631332 | 0.006090  | <a href="#">HLQENTQSHMR</a>  |
| 1.2   | 1395.627502 | 0.009920  | <a href="#">QHAGMFSISQMK</a> |
| 1.0   | 1395.645264 | -0.007842 | <a href="#">LNKDFTC DVER</a> |
| 0.0   | 1395.645264 | -0.007842 | <a href="#">VTEQCFNTLR</a>   |

# MASCOT SEARCH RESULTS

## Peptide View

MS/MS Fragmentation of **YYQENFCEQICKS**  
 Found in **CO6\_HUMAN**, Complement component C6 OS=Homo sapiens GN=C6 PE=1 SV=3

Match to Query 41286: 2078.885772 from(693.969200,3+) rtinseconds(2067) index(32264)  
 Title: Locus:1.1.1.3383.13 File:"2013-07-02 CLN FXIII 180 min 3rd F 3.wiff"  
 Data file C:\Program Files (x86)\Matrix Science\Mascot Daemon\mgf\9 FXIII 180 min 3rd\mascot\_daemon\_merge.mgf

Click mouse within plot area to zoom in by factor of two about that point  
 Or, Plot from  to  Da   
 Label all possible matches  Label matches used for scoring

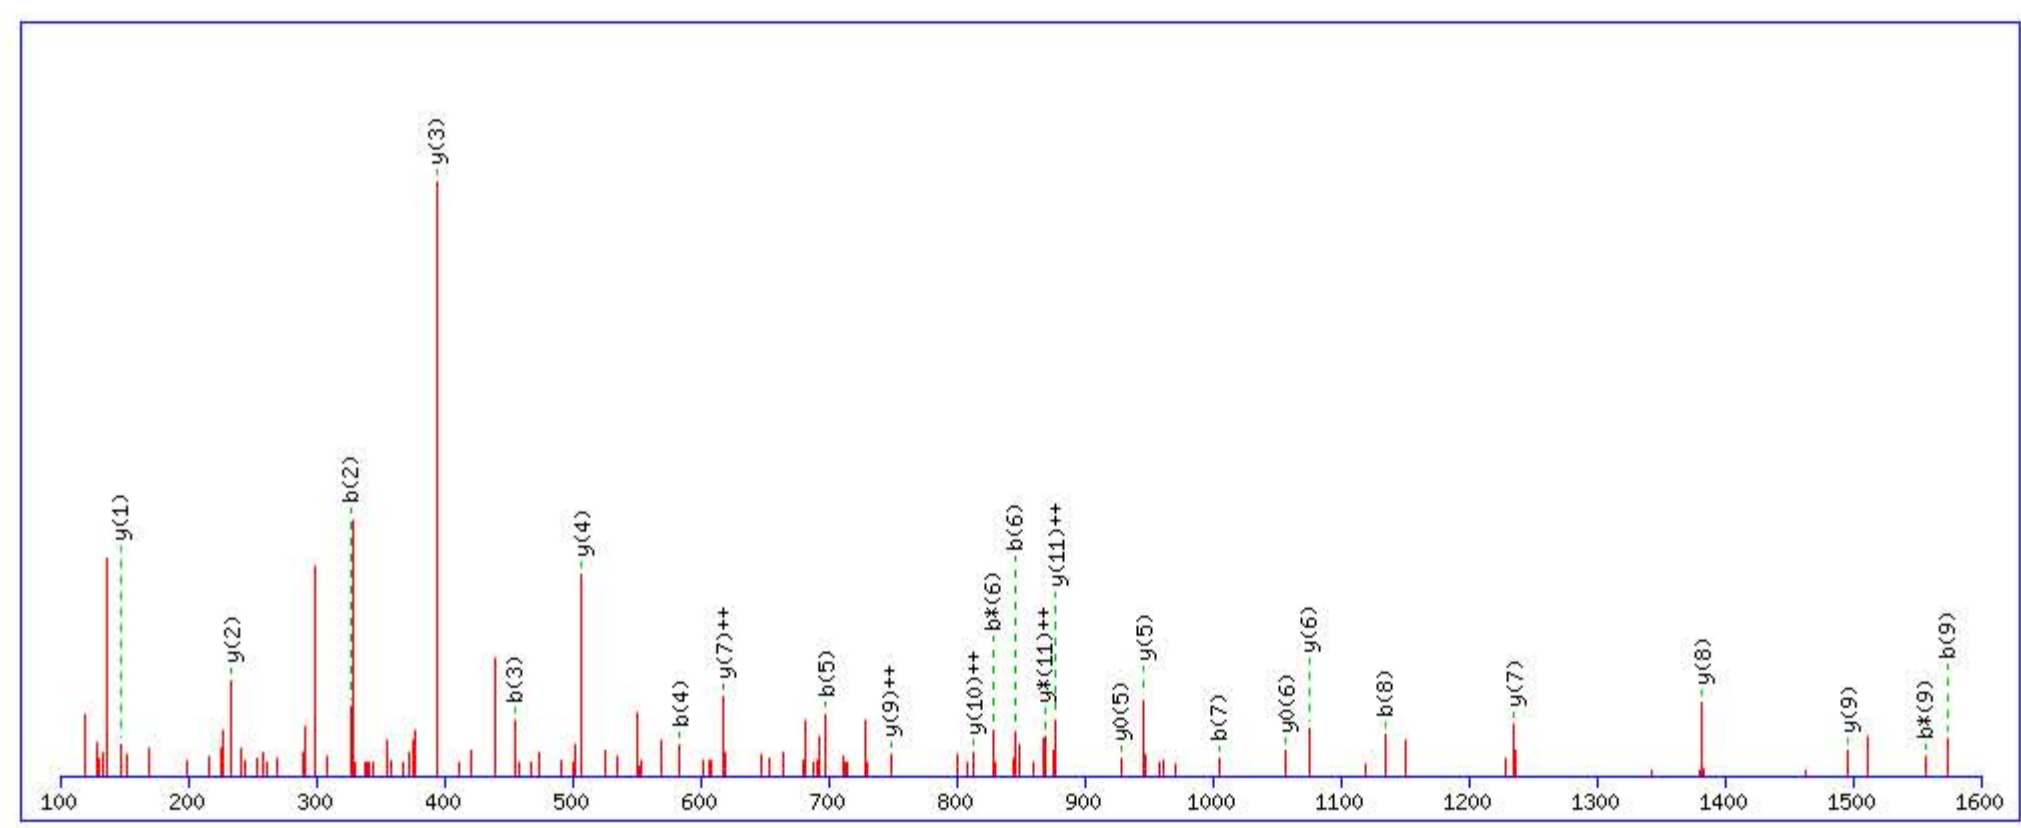

Monoisotopic mass of neutral peptide Mr(calc): 2078.889984  
 Fixed modifications: Carbamidomethyl (C) (apply to specified residues or termini only)  
 Variable modifications:  
 Q9 : Biotin:Thermo-21345 (Q)  
 Ions Score: 43 Expect: 0.00014  
 Matches : 26/132 fragment ions using 53 most intense peaks [\(help\)](#)

| #  | b                  | b <sup>++</sup> | b <sup>*</sup>     | b <sup>*++</sup> | b <sup>0</sup> | b <sup>0++</sup> | Seq. | y                  | y <sup>++</sup>   | y <sup>*</sup> | y <sup>*++</sup>  | y <sup>0</sup>     | y <sup>0++</sup> | #  |
|----|--------------------|-----------------|--------------------|------------------|----------------|------------------|------|--------------------|-------------------|----------------|-------------------|--------------------|------------------|----|
| 1  | 164.070605         | 82.538940       |                    |                  |                |                  | Y    |                    |                   |                |                   |                    |                  | 13 |
| 2  | <b>327.133934</b>  | 164.070605      |                    |                  |                |                  | Y    | 1916.833954        | 958.920615        | 1899.807405    | 950.407341        | 1898.823389        | 949.915333       | 12 |
| 3  | <b>455.192512</b>  | 228.099894      | 438.165963         | 219.586620       |                |                  | Q    | 1753.770625        | <b>877.388951</b> | 1736.744076    | <b>868.875676</b> | 1735.760060        | 868.383668       | 11 |
| 4  | <b>584.235105</b>  | 292.621191      | 567.208556         | 284.107916       | 566.224540     | 283.615908       | E    | 1625.712047        | <b>813.359662</b> | 1608.685498    | 804.846387        | 1607.701482        | 804.354379       | 10 |
| 5  | <b>698.278032</b>  | 349.642654      | 681.251483         | 341.129380       | 680.267467     | 340.637372       | N    | <b>1496.669454</b> | <b>748.838365</b> | 1479.642905    | 740.325091        | 1478.658889        | 739.833083       | 9  |
| 6  | <b>845.346446</b>  | 423.176861      | <b>828.319897</b>  | 414.663587       | 827.335881     | 414.171579       | F    | <b>1382.626527</b> | 691.816902        | 1365.599978    | 683.303627        | 1364.615962        | 682.811619       | 8  |
| 7  | <b>1005.377095</b> | 503.192186      | 988.350546         | 494.678911       | 987.366530     | 494.186903       | C    | <b>1235.558113</b> | <b>618.282695</b> | 1218.531564    | 609.769420        | 1217.547548        | 609.277412       | 7  |
| 8  | <b>1134.419688</b> | 567.713482      | 1117.393139        | 559.200208       | 1116.409123    | 558.708200       | E    | <b>1075.527464</b> | 538.267370        | 1058.500915    | 529.754096        | <b>1057.516899</b> | 529.262088       | 6  |
| 9  | <b>1573.645014</b> | 787.326145      | <b>1556.618465</b> | 778.812871       | 1555.634449    | 778.320863       | Q    | <b>946.484871</b>  | 473.746074        | 929.458322     | 465.232799        | <b>928.474306</b>  | 464.740791       | 5  |
| 10 | 1686.729078        | 843.868177      | 1669.702529        | 835.354903       | 1668.718513    | 834.862895       | I    | <b>507.259545</b>  | 254.133411        | 490.232996     | 245.620136        | 489.248980         | 245.128128       | 4  |
| 11 | 1846.759727        | 923.883502      | 1829.733178        | 915.370227       | 1828.749162    | 914.878219       | C    | <b>394.175481</b>  | 197.591379        | 377.148932     | 189.078104        | 376.164916         | 188.586096       | 3  |
| 12 | 1933.791755        | 967.399516      | 1916.765206        | 958.886241       | 1915.781190    | 958.394233       | S    | <b>234.144832</b>  | 117.576054        | 217.118283     | 109.062780        | 216.134267         | 108.570772       | 2  |
| 13 |                    |                 |                    |                  |                |                  | K    | <b>147.112804</b>  | 74.060040         | 130.086255     | 65.546765         |                    |                  | 1  |

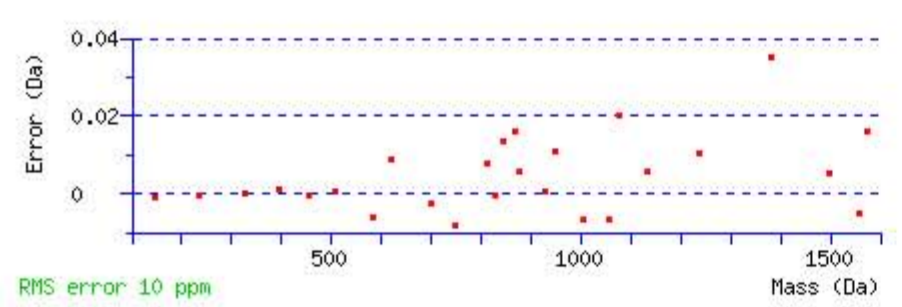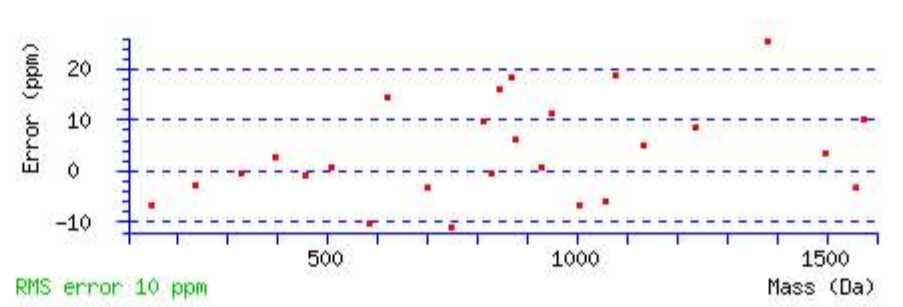

NCBI BLAST search of **YYQENFCEQICKS**  
 (Parameters: blastp, nr protein database, expect=20000, no filter, PAM30)  
 Other BLAST [web gateways](#)

### All matches to this query

| Score | Mr(calc):   | Delta     | Sequence                      |
|-------|-------------|-----------|-------------------------------|
| 43.2  | 2078.889984 | -0.004212 | <a href="#">YYQENFCEQICKS</a> |

# MASCOT Search Results

## Peptide View

MS/MS Fragmentation of **VPANLENVGFEVQTAEDDLK**

Found in **CO6\_HUMAN**, Complement component C6 OS=Homo sapiens GN=C6 PE=1 SV=3

Match to Query 48501: 2498.246292 from(833.756040,3+) rtinseconds(2666) index(22707)

Title: Locus:1.1.1.3493.23 File:"2013-07-02 CLN FXIII 180 min 3rd F 2.wiff"

Data file C:\Program Files (x86)\Matrix Science\Mascot Daemon\mgf9 FXIII 180 min 3rd\mascot\_daemon\_merge.mgf

Click mouse within plot area to zoom in by factor of two about that point

Or, Plot from  to  Da

Label all possible matches  Label matches used for scoring

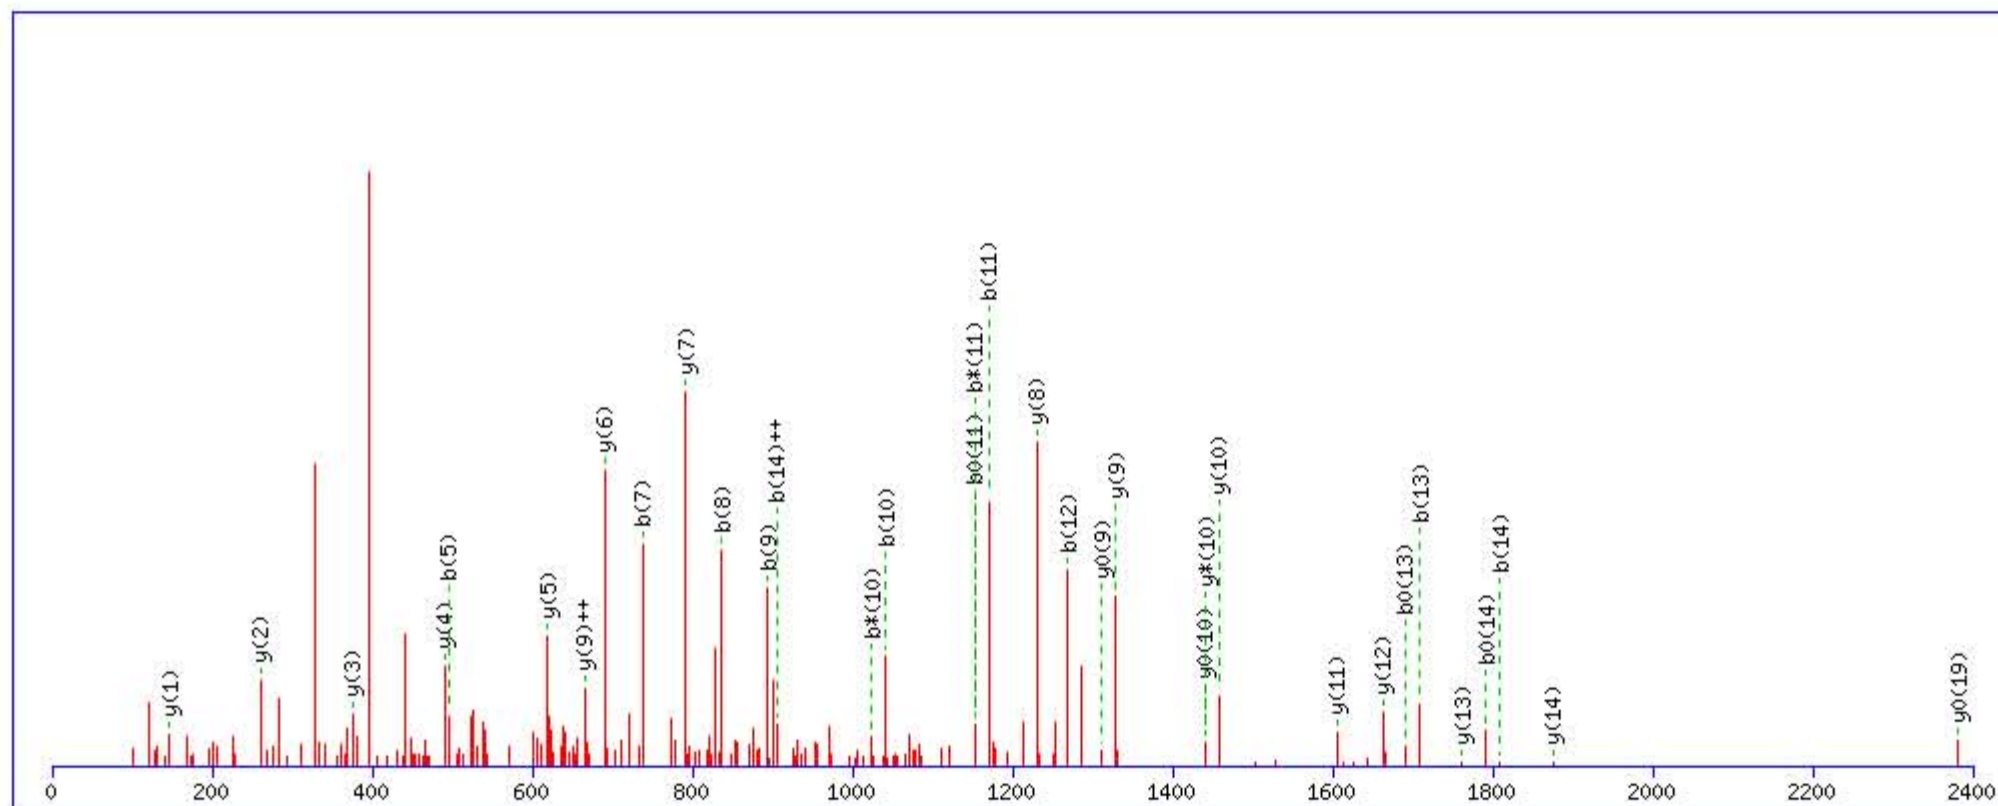

Monoisotopic mass of neutral peptide Mr(calc): 2498.236282

Fixed modifications: Carbamidomethyl (C) (apply to specified residues or termini only)

Variable modifications:

Q13 : Biotin:Thermo-21345 (Q)

Ions Score: 91 Expect: 2.3e-008

Matches : 34/208 fragment ions using 53 most intense peaks [\(help\)](#)

| #  | b                  | b <sup>++</sup>   | b <sup>*</sup>     | b <sup>*++</sup> | b <sup>0</sup>     | b <sup>0++</sup> | Seq. | y                  | y <sup>++</sup>   | y <sup>*</sup>     | y <sup>*++</sup> | y <sup>0</sup>     | y <sup>0++</sup> | #  |
|----|--------------------|-------------------|--------------------|------------------|--------------------|------------------|------|--------------------|-------------------|--------------------|------------------|--------------------|------------------|----|
| 1  | 100.075690         | 50.541483         |                    |                  |                    |                  | V    |                    |                   |                    |                  |                    |                  | 20 |
| 2  | 197.128454         | 99.067865         |                    |                  |                    |                  | P    | 2400.175154        | 1200.591215       | 2383.148605        | 1192.077940      | 2382.164589        | 1191.585932      | 19 |
| 3  | 268.165568         | 134.586422        |                    |                  |                    |                  | A    | 2303.122390        | 1152.064833       | 2286.095841        | 1143.551558      | 2285.111825        | 1143.059550      | 18 |
| 4  | 382.208495         | 191.607885        | 365.181946         | 183.094611       |                    |                  | N    | 2232.085276        | 1116.546276       | 2215.058727        | 1108.033001      | 2214.074711        | 1107.540993      | 17 |
| 5  | <b>495.292559</b>  | 248.149917        | 478.266010         | 239.636643       |                    |                  | L    | 2118.042349        | 1059.524812       | 2101.015800        | 1051.011538      | 2100.031784        | 1050.519530      | 16 |
| 6  | 624.335152         | 312.671214        | 607.308603         | 304.157940       | 606.324587         | 303.665932       | E    | 2004.958285        | 1002.982781       | 1987.931736        | 994.469506       | 1986.947720        | 993.977498       | 15 |
| 7  | <b>738.378079</b>  | 369.692678        | 721.351530         | 361.179403       | 720.367514         | 360.687395       | N    | <b>1875.915692</b> | 938.461484        | 1858.889143        | 929.948210       | 1857.905127        | 929.456202       | 14 |
| 8  | <b>837.446493</b>  | 419.226885        | 820.419944         | 410.713610       | 819.435928         | 410.221602       | V    | <b>1761.872765</b> | 881.440021        | 1744.846216        | 872.926746       | 1743.862200        | 872.434738       | 13 |
| 9  | <b>894.467957</b>  | 447.737617        | 877.441408         | 439.224342       | 876.457392         | 438.732334       | G    | <b>1662.804351</b> | 831.905814        | 1645.777802        | 823.392539       | 1644.793786        | 822.900531       | 12 |
| 10 | <b>1041.536371</b> | 521.271824        | <b>1024.509822</b> | 512.758549       | 1023.525806        | 512.266541       | F    | <b>1605.782887</b> | 803.395082        | 1588.756338        | 794.881807       | 1587.772322        | 794.389799       | 11 |
| 11 | <b>1170.578964</b> | 585.793120        | <b>1153.552415</b> | 577.279846       | <b>1152.568399</b> | 576.787838       | E    | <b>1458.714473</b> | 729.860875        | <b>1441.687924</b> | 721.347600       | <b>1440.703908</b> | 720.855592       | 10 |
| 12 | <b>1269.647378</b> | 635.327327        | 1252.620829        | 626.814053       | 1251.636813        | 626.322045       | V    | <b>1329.671880</b> | <b>665.339578</b> | 1312.645331        | 656.826304       | <b>1311.661315</b> | 656.334296       | 9  |
| 13 | <b>1708.872704</b> | 854.939990        | 1691.846155        | 846.426716       | <b>1690.862139</b> | 845.934708       | Q    | <b>1230.603466</b> | 615.805371        | 1213.576917        | 607.292097       | 1212.592901        | 606.800089       | 8  |
| 14 | <b>1809.920383</b> | <b>905.463830</b> | 1792.893834        | 896.950555       | <b>1791.909818</b> | 896.458547       | T    | <b>791.378140</b>  | 396.192708        | 774.351591         | 387.679434       | 773.367575         | 387.187426       | 7  |
| 15 | 1880.957497        | 940.982387        | 1863.930948        | 932.469112       | 1862.946932        | 931.977104       | A    | <b>690.330461</b>  | 345.668869        | 673.303912         | 337.155594       | 672.319896         | 336.663586       | 6  |
| 16 | 2010.000090        | 1005.503683       | 1992.973541        | 996.990409       | 1991.989525        | 996.498401       | E    | <b>619.293347</b>  | 310.150312        | 602.266798         | 301.637037       | 601.282782         | 301.145029       | 5  |
| 17 | 2125.027033        | 1063.017154       | 2108.000484        | 1054.503880      | 2107.016468        | 1054.011872      | D    | <b>490.250754</b>  | 245.629015        | 473.224205         | 237.115740       | 472.240189         | 236.623732       | 4  |
| 18 | 2240.053976        | 1120.530626       | 2223.027427        | 1112.017351      | 2222.043411        | 1111.525343      | D    | <b>375.223811</b>  | 188.115543        | 358.197262         | 179.602269       | 357.213246         | 179.110261       | 3  |
| 19 | 2353.138040        | 1177.072658       | 2336.111491        | 1168.559383      | 2335.127475        | 1168.067375      | L    | <b>260.196868</b>  | 130.602072        | 243.170319         | 122.088798       |                    |                  | 2  |
| 20 |                    |                   |                    |                  |                    |                  | K    | <b>147.112804</b>  | 74.060040         | 130.086255         | 65.546765        |                    |                  | 1  |

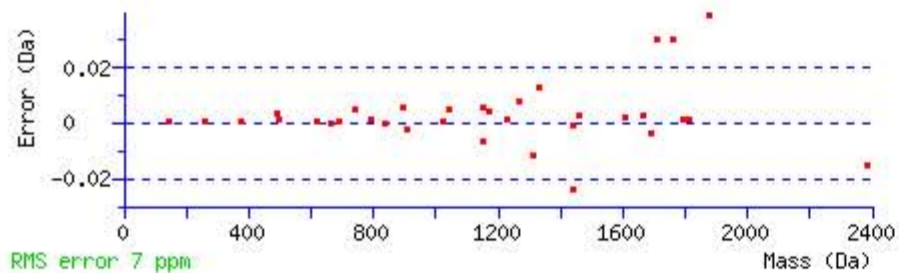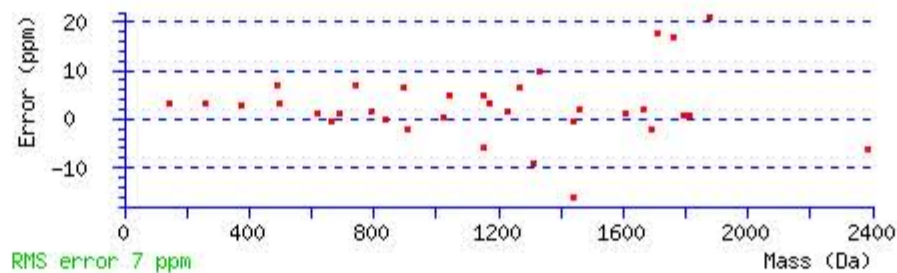

NCBI BLAST search of [VPANLENVGFEVQTAEDDLK](#)

(Parameters: blastp, nr protein database, expect=20000, no filter, PAM30)

Other BLAST [web gateways](#)

## All matches to this query

| Score | Mr(calc):   | Delta    | Sequence                             |
|-------|-------------|----------|--------------------------------------|
| 91.1  | 2498.236282 | 0.010010 | <a href="#">VPANLENVGFEVQTAEDDLK</a> |

**MASCOT** SCIENCE Mascot Search Results

Peptide View

MS/MS Fragmentation of **SFGGQCR**

Found in **CO7\_HUMAN**, Complement component C7 OS=Homo sapiens GN=C7 PE=1 SV=2

Match to Query 14863: 1121.508988 from(561.761770,2+) rtinseconds(1587) index(2517)

Title: Locus:1.1.1.3072.12 File:"2013-07-02 CLN FXIII 180 min 3rd F 1.wiff"

Data file C:\Program Files (x86)\Matrix Science\Mascot Daemon\mgf9 FXIII 180 min 3rd\mascot\_daemon\_merge.mgf

Click mouse within plot area to zoom in by factor of two about that point

Or, Plot from  to  Da

Label all possible matches  Label matches used for scoring

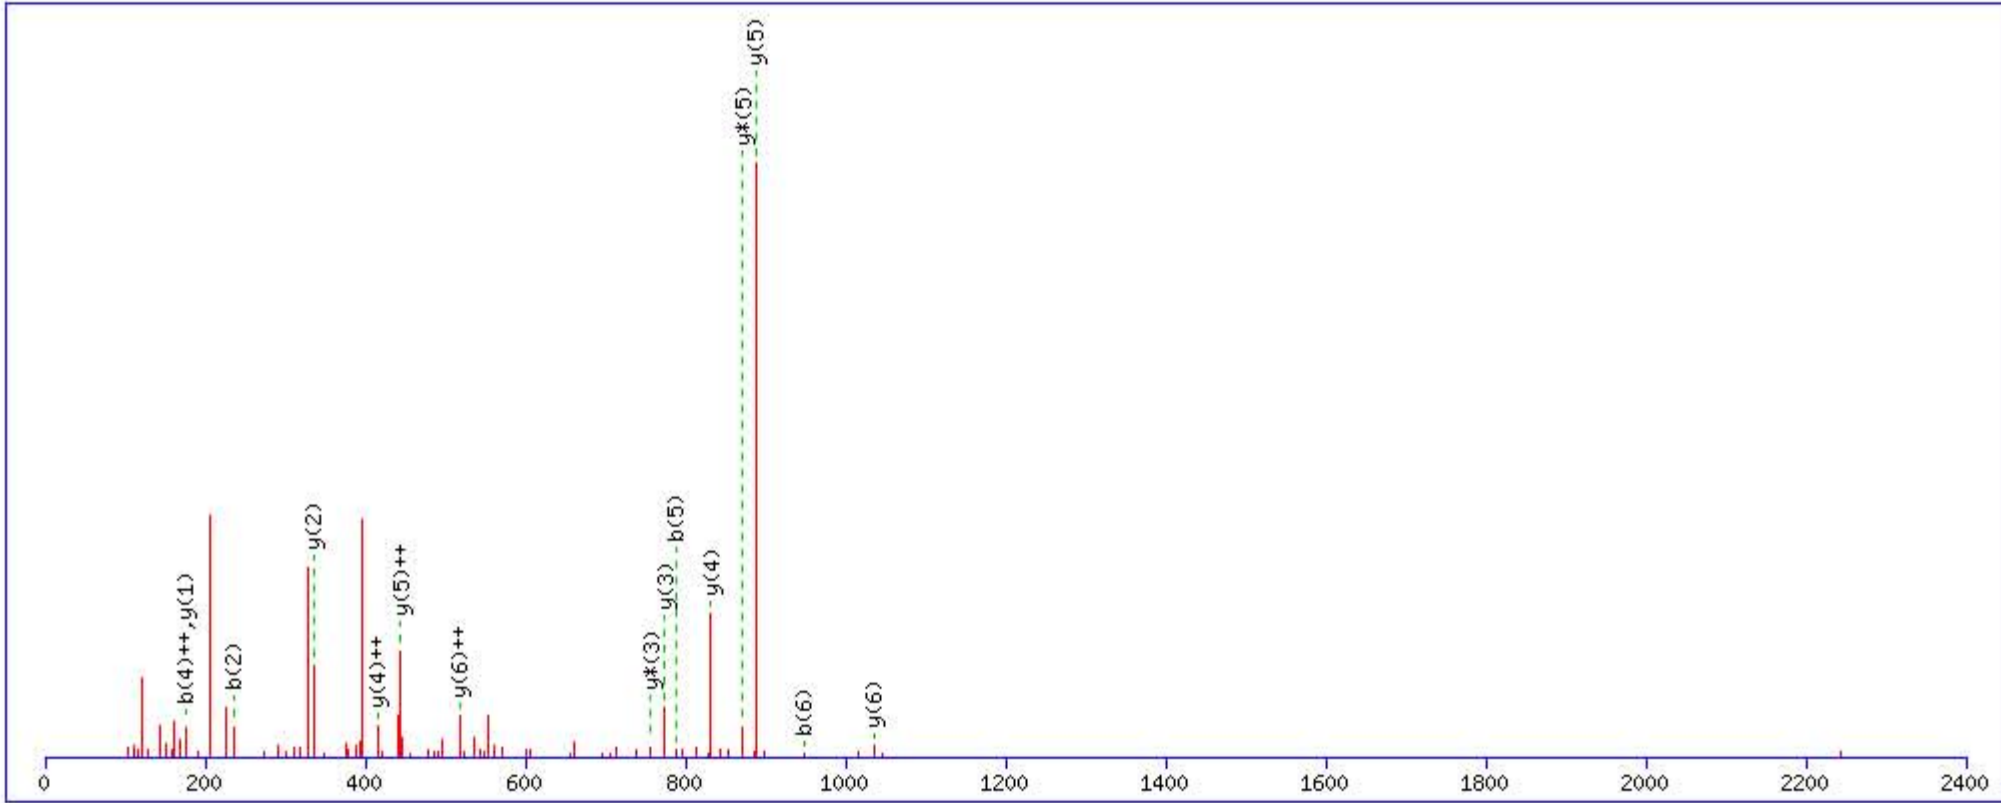

Monoisotopic mass of neutral peptide Mr(calc): 1121.511032

Fixed modifications: Carbamidomethyl (C) (apply to specified residues or termini only)

Variable modifications:

Q5 : Biotin:Thermo-21345 (Q)

Ions Score: 25 Expect: 0.0071

Matches : 15/52 fragment ions using 36 most intense peaks [\(help\)](#)

| # | b                 | b <sup>++</sup>   | b <sup>*</sup> | b <sup>*++</sup> | b <sup>0</sup> | b <sup>0++</sup> | Seq. | y                  | y <sup>++</sup>   | y <sup>*</sup>    | y <sup>*++</sup> | # |
|---|-------------------|-------------------|----------------|------------------|----------------|------------------|------|--------------------|-------------------|-------------------|------------------|---|
| 1 | 88.039304         | 44.523290         |                |                  | 70.028739      | 35.518008        | S    |                    |                   |                   |                  | 7 |
| 2 | <b>235.107718</b> | 118.057497        |                |                  | 217.097153     | 109.052214       | F    | <b>1035.486269</b> | <b>518.246773</b> | 1018.459720       | 509.733498       | 6 |
| 3 | 292.129182        | 146.568229        |                |                  | 274.118617     | 137.562946       | G    | <b>888.417855</b>  | <b>444.712566</b> | <b>871.391306</b> | 436.199291       | 5 |
| 4 | 349.150646        | <b>175.078961</b> |                |                  | 331.140081     | 166.073678       | G    | <b>831.396391</b>  | <b>416.201834</b> | 814.369842        | 407.688559       | 4 |
| 5 | <b>788.375972</b> | 394.691624        | 771.349423     | 386.178350       | 770.365407     | 385.686342       | Q    | <b>774.374927</b>  | 387.691102        | <b>757.348378</b> | 379.177827       | 3 |
| 6 | <b>948.406621</b> | 474.706949        | 931.380072     | 466.193674       | 930.396056     | 465.701666       | C    | <b>335.149601</b>  | 168.078438        | 318.123052        | 159.565164       | 2 |
| 7 |                   |                   |                |                  |                |                  | R    | <b>175.118952</b>  | 88.063114         | 158.092403        | 79.549839        | 1 |

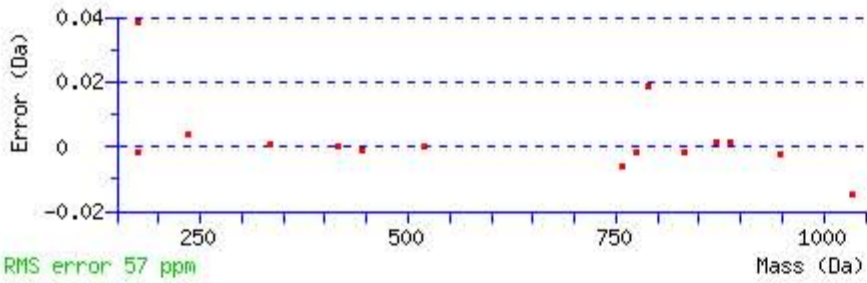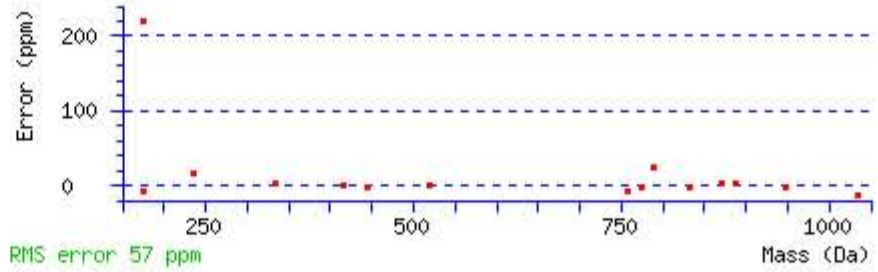

NCBI BLAST search of **SFGGQCR**

(Parameters: blastp, nr protein database, expect=20000, no filter, PAM30)

Other BLAST [web gateways](#)

All matches to this query

| Score | Mr(calc):   | Delta     | Sequence                   |
|-------|-------------|-----------|----------------------------|
| 25.0  | 1121.511032 | -0.002044 | <a href="#">SFGGQCR</a>    |
| 2.1   | 1121.502274 | 0.006714  | <a href="#">MSVEEQIDR</a>  |
| 2.0   | 1121.494873 | 0.014115  | <a href="#">SANTSPSSSR</a> |
| 1.1   | 1121.500259 | 0.008729  | <a href="#">HPGFHQEDR</a>  |

# MASCOT SCIENCE Mascot Search Results

## Peptide View

MS/MS Fragmentation of **CFSGQCISK**

Found in **CO7\_HUMAN**, Complement component C7 OS=Homo sapiens GN=C7 PE=1 SV=2

Match to Query 23527: 1396.630768 from(699.322660,2+) rtinseconds(1705) index(3239)

Title: Locus:1.1.1.3113.13 File:"2013-07-02 CLN FXIII 180 min 3rd F 1.wiff"

Data file C:\Program Files (x86)\Matrix Science\Mascot Daemon\mgf\9 FXIII 180 min 3rd\mascot\_daemon\_merge.mgf

Click mouse within plot area to zoom in by factor of two about that point

Or, Plot from  to  Da

Label all possible matches  Label matches used for scoring

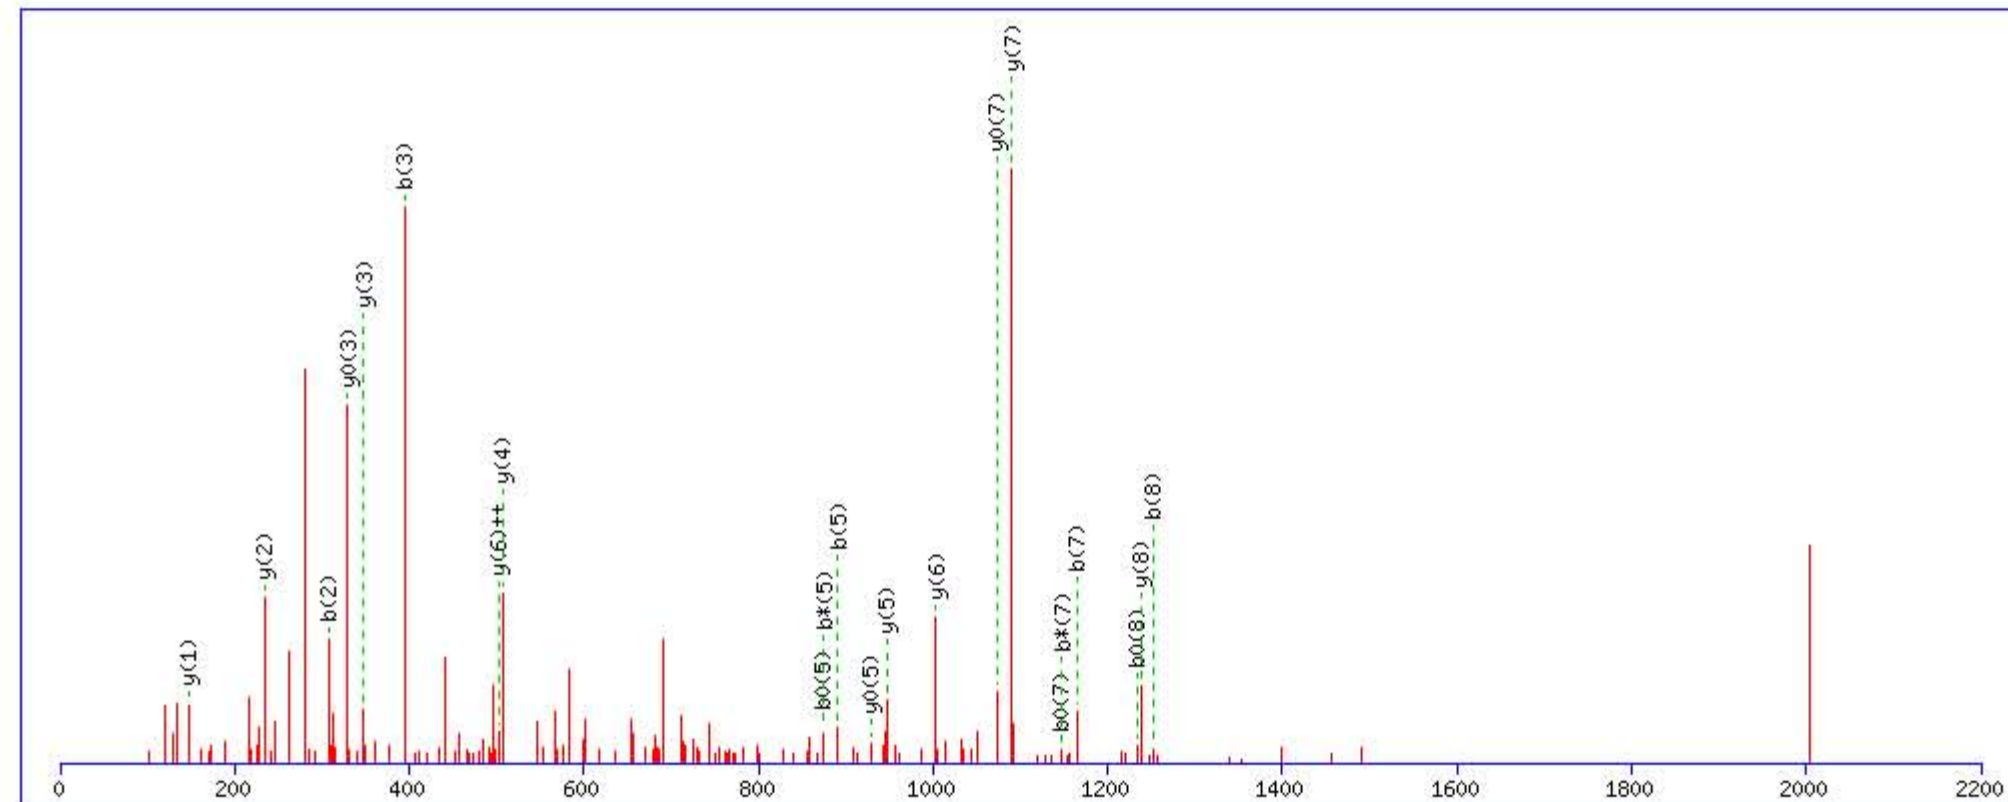

Monoisotopic mass of neutral peptide Mr(calc): 1396.630157

Fixed modifications: Carbamidomethyl (C) (apply to specified residues or termini only)

Variable modifications:

Q5 : Biotin:Thermo-21345 (Q)

Ions Score: 40 Expect: 0.00096

Matches : 22/82 fragment ions using 50 most intense peaks ([help](#))

| # | b                  | b <sup>++</sup> | b <sup>*</sup>     | b <sup>+++</sup> | b <sup>0</sup>     | b <sup>0++</sup> | Seq. | y                  | y <sup>++</sup>   | y <sup>*</sup> | y <sup>+++</sup> | y <sup>0</sup>     | y <sup>0++</sup> | # |
|---|--------------------|-----------------|--------------------|------------------|--------------------|------------------|------|--------------------|-------------------|----------------|------------------|--------------------|------------------|---|
| 1 | 161.037925         | 81.022600       |                    |                  |                    |                  | C    |                    |                   |                |                  |                    |                  | 9 |
| 2 | <b>308.106339</b>  | 154.556807      |                    |                  |                    |                  | F    | <b>1237.606777</b> | 619.307027        | 1220.580228    | 610.793752       | 1219.596212        | 610.301744       | 8 |
| 3 | <b>395.138367</b>  | 198.072821      |                    |                  | 377.127802         | 189.067539       | S    | <b>1090.538363</b> | 545.772819        | 1073.511814    | 537.259545       | <b>1072.527798</b> | 536.767537       | 7 |
| 4 | 452.159831         | 226.583553      |                    |                  | 434.149266         | 217.578271       | G    | <b>1003.506335</b> | <b>502.256806</b> | 986.479786     | 493.743531       | 985.495770         | 493.251523       | 6 |
| 5 | <b>891.385157</b>  | 446.196217      | <b>874.358608</b>  | 437.682942       | <b>873.374592</b>  | 437.190934       | Q    | <b>946.484871</b>  | 473.746074        | 929.458322     | 465.232799       | <b>928.474306</b>  | 464.740791       | 5 |
| 6 | 1051.415806        | 526.211541      | 1034.389257        | 517.698267       | 1033.405241        | 517.206258       | C    | <b>507.259545</b>  | 254.133410        | 490.232996     | 245.620136       | 489.248980         | 245.128128       | 4 |
| 7 | <b>1164.499870</b> | 582.753573      | <b>1147.473321</b> | 574.240298       | <b>1146.489305</b> | 573.748290       | I    | <b>347.228896</b>  | 174.118086        | 330.202347     | 165.604811       | <b>329.218331</b>  | 165.112803       | 3 |
| 8 | <b>1251.531898</b> | 626.269587      | 1234.505349        | 617.756313       | <b>1233.521333</b> | 617.264304       | S    | <b>234.144832</b>  | 117.576054        | 217.118283     | 109.062780       | 216.134267         | 108.570772       | 2 |
| 9 |                    |                 |                    |                  |                    |                  | K    | <b>147.112804</b>  | 74.060040         | 130.086255     | 65.546765        |                    |                  | 1 |

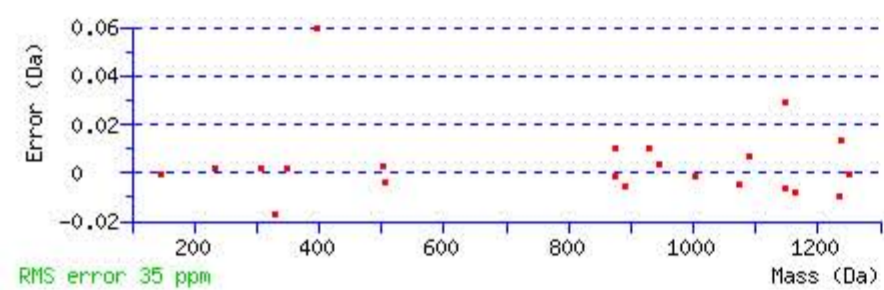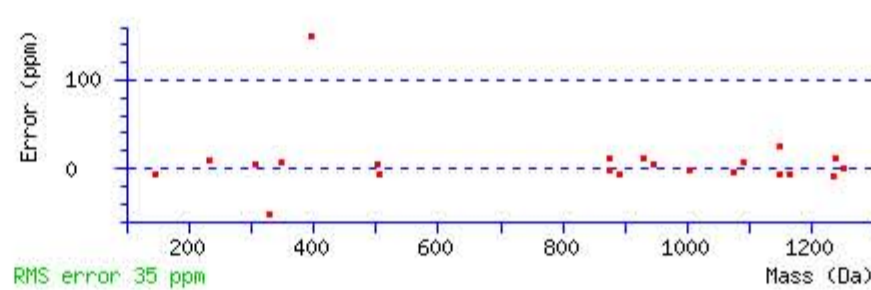

NCBI BLAST search of **CFSGQCISK**

(Parameters: blastp, nr protein database, expect=20000, no filter, PAM30)

Other BLAST [web gateways](#)

All matches to this query

| Score | Mr(calc):   | Delta    | Sequence                     |
|-------|-------------|----------|------------------------------|
| 39.6  | 1396.630157 | 0.000611 | <a href="#">CFSGQCISK</a>    |
| 23.7  | 1396.629272 | 0.001496 | <a href="#">QLSQAEATDFCK</a> |

Mascot: <http://www.matrixscience.com/>



# MASCOT Search Results

## Peptide View

MS/MS Fragmentation of **AASGTQNNVLR**

Found in **CO7\_HUMAN**, Complement component C7 OS=Homo sapiens GN=C7 PE=1 SV=2

Match to Query 25637: 1440.747522 from(481.256450,3+) rtinseconds(1644) index(2889)

Title: Locus:1.1.1.3092.12 File:"2013-07-02 CLN FXIII 180 min 3rd F 1.wiff"

Data file C:\Program Files (x86)\Matrix Science\Mascot Daemon\mgf\9 FXIII 180 min 3rd\mascot\_daemon\_merge.mgf

Click mouse within plot area to zoom in by factor of two about that point

Or, Plot from  to  Da

Label all possible matches  Label matches used for scoring

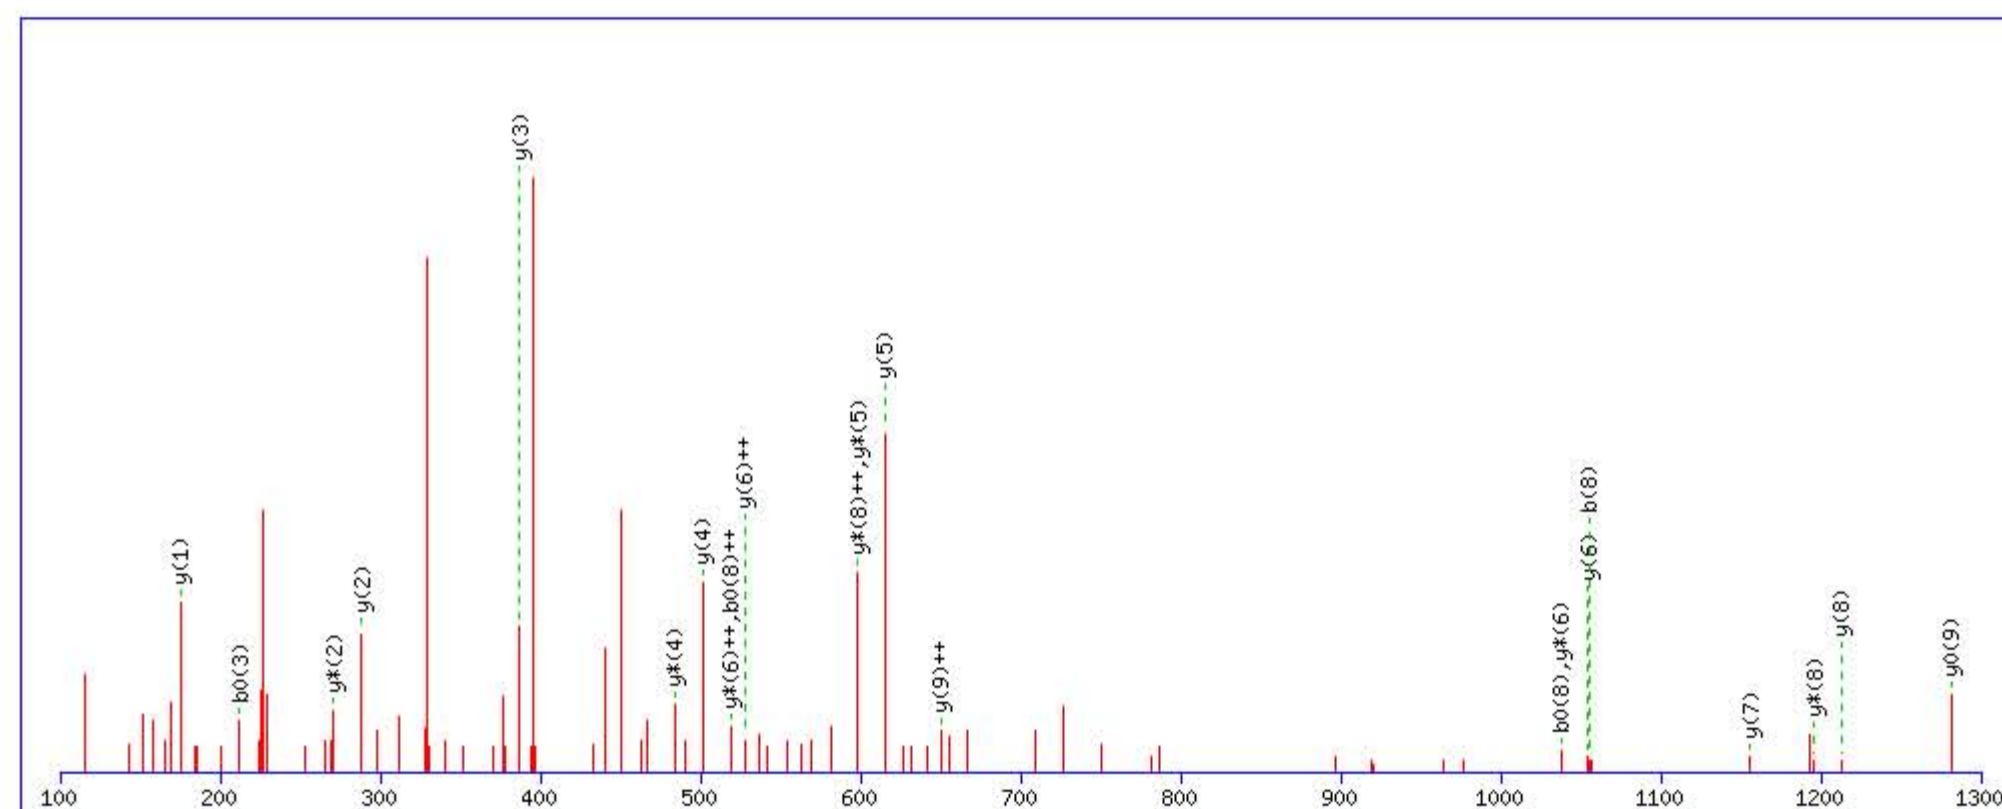

Monoisotopic mass of neutral peptide Mr(calc): 1440.750717

Fixed modifications: Carbamidomethyl (C) (apply to specified residues or termini only)

Variable modifications:

Q6 : Biotin:Thermo-21345 (Q)

Ions Score: 32 Expect: 0.002

Matches : 22/94 fragment ions using 48 most intense peaks [\(help\)](#)

| #  | b           | b <sup>++</sup> | b <sup>*</sup> | b <sup>*++</sup> | b <sup>0</sup> | b <sup>0++</sup> | Seq. | y           | y <sup>++</sup> | y <sup>*</sup> | y <sup>*++</sup> | y <sup>0</sup> | y <sup>0++</sup> | #  |
|----|-------------|-----------------|----------------|------------------|----------------|------------------|------|-------------|-----------------|----------------|------------------|----------------|------------------|----|
| 1  | 72.044390   | 36.525833       |                |                  |                |                  | A    |             |                 |                |                  |                |                  | 11 |
| 2  | 143.081504  | 72.044390       |                |                  |                |                  | A    | 1370.720895 | 685.864086      | 1353.694346    | 677.350811       | 1352.710330    | 676.858803       | 10 |
| 3  | 230.113532  | 115.560404      |                |                  | 212.102967     | 106.555121       | S    | 1299.683781 | 650.345529      | 1282.657232    | 641.832254       | 1281.673216    | 641.340246       | 9  |
| 4  | 287.134996  | 144.071136      |                |                  | 269.124431     | 135.065854       | G    | 1212.651753 | 606.829515      | 1195.625204    | 598.316240       | 1194.641188    | 597.824232       | 8  |
| 5  | 388.182675  | 194.594976      |                |                  | 370.172110     | 185.589693       | T    | 1155.630289 | 578.318783      | 1138.603740    | 569.805508       | 1137.619724    | 569.313500       | 7  |
| 6  | 827.408001  | 414.207639      | 810.381452     | 405.694364       | 809.397436     | 405.202356       | Q    | 1054.582610 | 527.794943      | 1037.556061    | 519.281669       |                |                  | 6  |
| 7  | 941.450928  | 471.229102      | 924.424379     | 462.715828       | 923.440363     | 462.223820       | N    | 615.357284  | 308.182280      | 598.330735     | 299.669006       |                |                  | 5  |
| 8  | 1055.493855 | 528.250566      | 1038.467306    | 519.737291       | 1037.483290    | 519.245283       | N    | 501.314357  | 251.160816      | 484.287808     | 242.647542       |                |                  | 4  |
| 9  | 1154.562269 | 577.784773      | 1137.535720    | 569.271498       | 1136.551704    | 568.779490       | V    | 387.271430  | 194.139353      | 370.244881     | 185.626078       |                |                  | 3  |
| 10 | 1267.646333 | 634.326805      | 1250.619784    | 625.813530       | 1249.635768    | 625.321522       | L    | 288.203016  | 144.605146      | 271.176467     | 136.091871       |                |                  | 2  |
| 11 |             |                 |                |                  |                |                  | R    | 175.118952  | 88.063114       | 158.092403     | 79.549839        |                |                  | 1  |

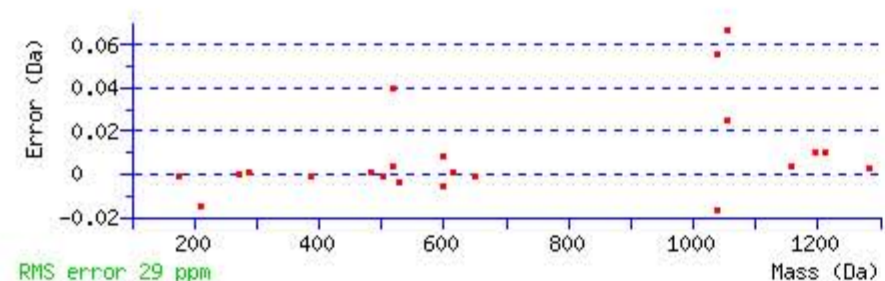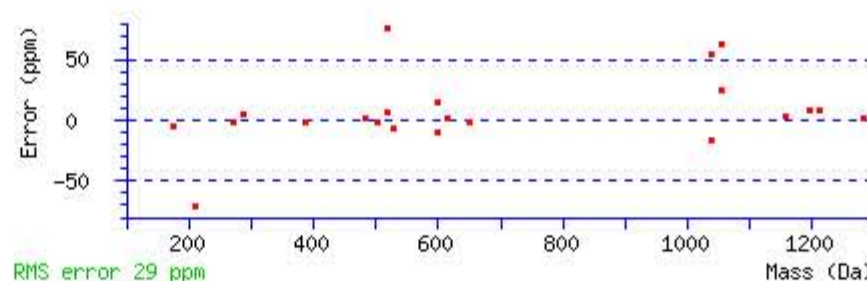

NCBI BLAST search of **AASGTQNNVLR**

(Parameters: blastp, nr protein database, expect=20000, no filter, PAM30)

Other BLAST [web gateways](#)

All matches to this query

| Score | Mr(calc):   | Delta     | Sequence                    |
|-------|-------------|-----------|-----------------------------|
| 31.6  | 1440.750717 | -0.003195 | <a href="#">AASGTQNNVLR</a> |
| 2.7   | 1440.750717 | -0.003195 | <a href="#">LDQLDASRGR</a>  |
| 2.0   | 1440.754745 | -0.007223 | <a href="#">WEATQQVLR</a>   |

Mascot: <http://www.matrixscience.com/>

# MASCOT Search Results

## Peptide View

MS/MS Fragmentation of **WLVGEMHCQK**

Found in **CO7\_HUMAN**, Complement component C7 OS=Homo sapiens GN=C7 PE=1 SV=2

Match to Query 30508: 1597.751052 from(533.590960,3+) rtinseconds(1901) index(18330)

Title: Locus:1.1.1.3228.7 File:"2013-07-02 CLN FXIII 180 min 3rd F 2.wiff"

Data file C:\Program Files (x86)\Matrix Science\Mascot Daemon\mgf\9 FXIII 180 min 3rd\mascot\_daemon\_merge.mgf

Click mouse within plot area to zoom in by factor of two about that point

Or, Plot from  to  Da

Label all possible matches  Label matches used for scoring

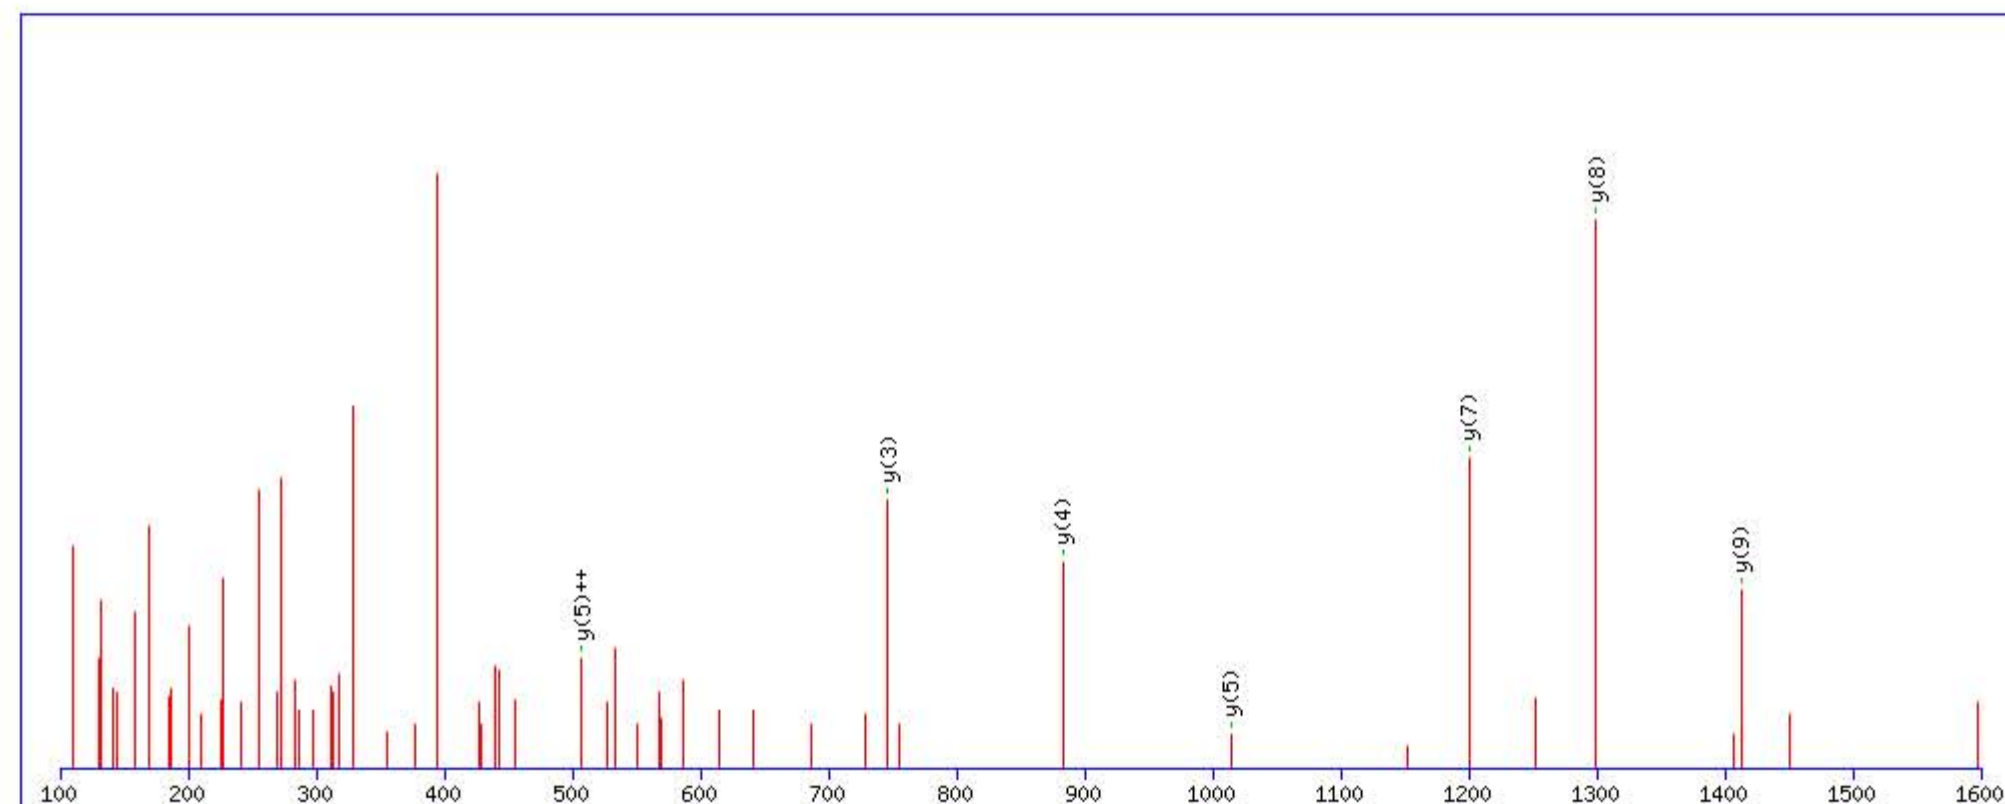

Monoisotopic mass of neutral peptide Mr(calc): 1597.756744

Fixed modifications: Carbamidomethyl (C) (apply to specified residues or termini only)

Variable modifications:

Q9 : Biotin:Thermo-21345 (Q)

Ions Score: 33 Expect: 0.0076

Matches : 7/74 fragment ions using 13 most intense peaks [\(help\)](#)

| #  | b           | b <sup>++</sup> | b <sup>*</sup> | b <sup>*++</sup> | b <sup>0</sup> | b <sup>0++</sup> | Seq. | y           | y <sup>++</sup> | y <sup>*</sup> | y <sup>*++</sup> | y <sup>0</sup> | y <sup>0++</sup> | #  |
|----|-------------|-----------------|----------------|------------------|----------------|------------------|------|-------------|-----------------|----------------|------------------|----------------|------------------|----|
| 1  | 187.086589  | 94.046932       |                |                  |                |                  | W    |             |                 |                |                  |                |                  | 10 |
| 2  | 300.170653  | 150.588965      |                |                  |                |                  | L    | 1412.684711 | 706.845994      | 1395.658162    | 698.332719       | 1394.674146    | 697.840711       | 9  |
| 3  | 399.239067  | 200.123172      |                |                  |                |                  | V    | 1299.600647 | 650.303962      | 1282.574098    | 641.790687       | 1281.590082    | 641.298679       | 8  |
| 4  | 456.260531  | 228.633904      |                |                  |                |                  | G    | 1200.532233 | 600.769755      | 1183.505684    | 592.256480       | 1182.521668    | 591.764472       | 7  |
| 5  | 585.303124  | 293.155200      |                |                  | 567.292559     | 284.149918       | E    | 1143.510769 | 572.259023      | 1126.484220    | 563.745748       | 1125.500204    | 563.253740       | 6  |
| 6  | 716.343609  | 358.675443      |                |                  | 698.333044     | 349.670160       | M    | 1014.468176 | 507.737726      | 997.441627     | 499.224452       |                |                  | 5  |
| 7  | 853.402521  | 427.204899      |                |                  | 835.391956     | 418.199616       | H    | 883.427691  | 442.217484      | 866.401142     | 433.704209       |                |                  | 4  |
| 8  | 1013.433170 | 507.220223      |                |                  | 995.422605     | 498.214941       | C    | 746.368779  | 373.688028      | 729.342230     | 365.174753       |                |                  | 3  |
| 9  | 1452.658496 | 726.832886      | 1435.631947    | 718.319612       | 1434.647931    | 717.827604       | Q    | 586.338130  | 293.672703      | 569.311581     | 285.159429       |                |                  | 2  |
| 10 |             |                 |                |                  |                |                  | K    | 147.112804  | 74.060040       | 130.086255     | 65.546765        |                |                  | 1  |

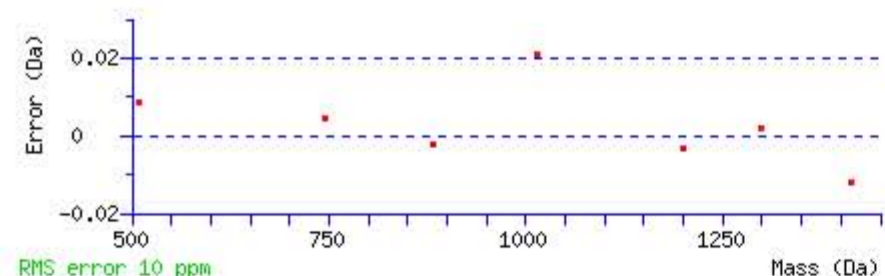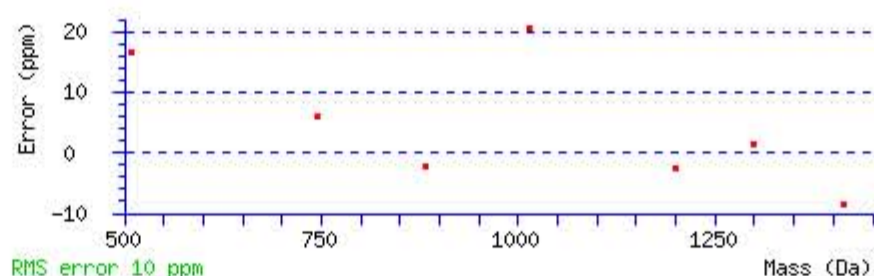

NCBI BLAST search of [WLVGEMHCQK](#)

(Parameters: blastp, nr protein database, expect=20000, no filter, PAM30)

Other BLAST [web gateways](#)

All matches to this query

| Score | Mr(calc):   | Delta     | Sequence                   |
|-------|-------------|-----------|----------------------------|
| 33.0  | 1597.756744 | -0.005692 | <a href="#">WLVGEMHCQK</a> |

Mascot: <http://www.matrixscience.com/>

# MASCOT SEARCH RESULTS

## Peptide View

MS/MS Fragmentation of **LSGNVLSYTFQVK**

Found in **CO7\_HUMAN**, Complement component C7 OS=Homo sapiens GN=C7 PE=1 SV=2

Match to Query 34973: 1765.964068 from(883.989310,2+) rtinseconds(2523) index(7677)

Title: Locus:1.1.1.3398.20 File:"2013-07-02 CLN FXIII 180 min 3rd F 1.wiff"

Data file C:\Program Files (x86)\Matrix Science\Mascot Daemon\mgf\9 FXIII 180 min 3rd\mascot\_daemon\_merge.mgf

Click mouse within plot area to zoom in by factor of two about that point

Or, Plot from  to  Da

Label all possible matches  Label matches used for scoring

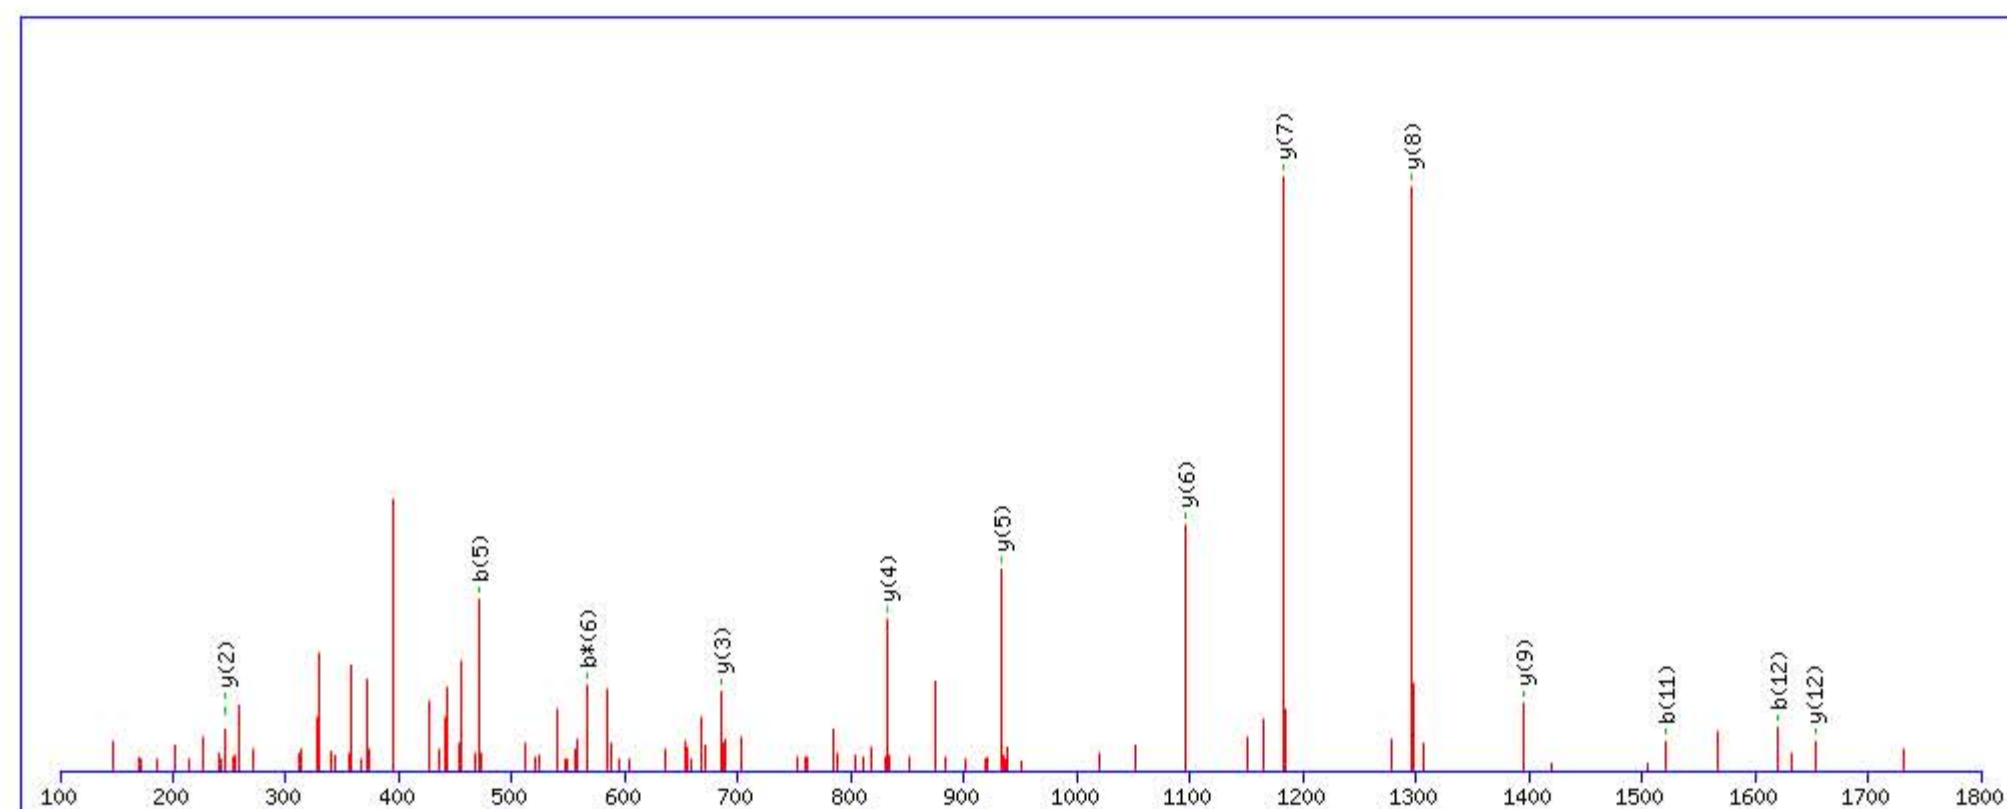

Monoisotopic mass of neutral peptide Mr(calc): 1765.943680

Fixed modifications: Carbamidomethyl (C) (apply to specified residues or termini only)

Variable modifications:

Q11 : Biotin:Thermo-21345 (Q)

Ions Score: 79 Expect: 2.7e-007

Matches : 13/128 fragment ions using 16 most intense peaks [\(help\)](#)

| #  | b                  | b <sup>++</sup> | b <sup>*</sup>    | b <sup>*++</sup> | b <sup>0</sup> | b <sup>0++</sup> | Seq. | y                  | y <sup>++</sup> | y <sup>*</sup> | y <sup>*++</sup> | y <sup>0</sup> | y <sup>0++</sup> | #  |
|----|--------------------|-----------------|-------------------|------------------|----------------|------------------|------|--------------------|-----------------|----------------|------------------|----------------|------------------|----|
| 1  | 114.091340         | 57.549308       |                   |                  |                |                  | L    |                    |                 |                |                  |                |                  | 13 |
| 2  | 201.123368         | 101.065322      |                   |                  | 183.112803     | 92.060039        | S    | <b>1653.866891</b> | 827.437084      | 1636.840342    | 818.923809       | 1635.856326    | 818.431801       | 12 |
| 3  | 258.144832         | 129.576054      |                   |                  | 240.134267     | 120.570771       | G    | 1566.834863        | 783.921070      | 1549.808314    | 775.407795       | 1548.824298    | 774.915787       | 11 |
| 4  | 372.187759         | 186.597517      | 355.161210        | 178.084243       | 354.177194     | 177.592235       | N    | 1509.813399        | 755.410338      | 1492.786850    | 746.897063       | 1491.802834    | 746.405055       | 10 |
| 5  | <b>471.256173</b>  | 236.131724      | 454.229624        | 227.618450       | 453.245608     | 227.126442       | V    | <b>1395.770472</b> | 698.388874      | 1378.743923    | 689.875600       | 1377.759907    | 689.383592       | 9  |
| 6  | 584.340237         | 292.673757      | <b>567.313688</b> | 284.160482       | 566.329672     | 283.668474       | L    | <b>1296.702058</b> | 648.854667      | 1279.675509    | 640.341393       | 1278.691493    | 639.849385       | 8  |
| 7  | 671.372265         | 336.189771      | 654.345716        | 327.676496       | 653.361700     | 327.184488       | S    | <b>1183.617994</b> | 592.312635      | 1166.591445    | 583.799361       | 1165.607429    | 583.307353       | 7  |
| 8  | 834.435594         | 417.721435      | 817.409045        | 409.208161       | 816.425029     | 408.716153       | Y    | <b>1096.585966</b> | 548.796621      | 1079.559417    | 540.283347       | 1078.575401    | 539.791339       | 6  |
| 9  | 935.483273         | 468.245275      | 918.456724        | 459.732000       | 917.472708     | 459.239992       | T    | <b>933.522637</b>  | 467.264957      | 916.496088     | 458.751682       | 915.512072     | 458.259674       | 5  |
| 10 | 1082.551687        | 541.779482      | 1065.525138       | 533.266207       | 1064.541122    | 532.774199       | F    | <b>832.474958</b>  | 416.741117      | 815.448409     | 408.227843       |                |                  | 4  |
| 11 | <b>1521.777013</b> | 761.392145      | 1504.750464       | 752.878870       | 1503.766448    | 752.386862       | Q    | <b>685.406544</b>  | 343.206910      | 668.379995     | 334.693636       |                |                  | 3  |
| 12 | <b>1620.845427</b> | 810.926352      | 1603.818878       | 802.413077       | 1602.834862    | 801.921069       | V    | <b>246.181218</b>  | 123.594247      | 229.154669     | 115.080973       |                |                  | 2  |
| 13 |                    |                 |                   |                  |                |                  | K    | 147.112804         | 74.060040       | 130.086255     | 65.546765        |                |                  | 1  |

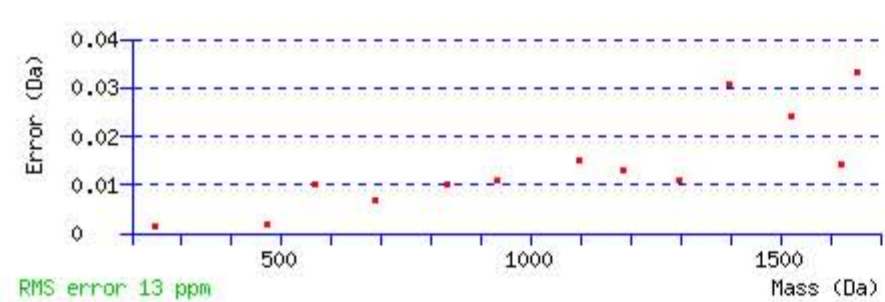

RMS error 13 ppm

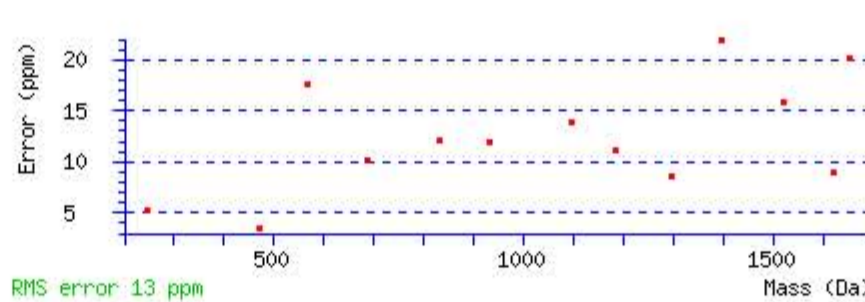

RMS error 13 ppm

NCBI BLAST search of [LSGNVLSYTFQVK](#)

(Parameters: blastp, nr protein database, expect=20000, no filter, PAM30)

Other BLAST [web gateways](#)

## All matches to this query

| Score | Mr(calc):   | Delta     | Sequence                          |
|-------|-------------|-----------|-----------------------------------|
| 78.7  | 1765.943680 | 0.020388  | <a href="#">LSGNVLSYTFQVK</a>     |
| 8.3   | 1765.982544 | -0.018476 | <a href="#">SLQLDIIPASIPGSEVK</a> |
| 5.8   | 1765.950882 | 0.013186  | <a href="#">VTGNVSKKTNLYVMGR</a>  |
| 5.0   | 1765.973328 | -0.009260 | <a href="#">GKRPSQGCPSKIARPK</a>  |
| 2.3   | 1765.987244 | -0.023176 | <a href="#">GNVDVALNMLRNILPK</a>  |
| 1.7   | 1765.964767 | -0.000699 | <a href="#">IKEVEEKQPEVK</a>      |

# MASCOT SCIENCE Mascot Search Results

## Peptide View

MS/MS Fragmentation of **EQTMSECEAGALR**

Found in **CO7\_HUMAN**, Complement component C7 OS=Homo sapiens GN=C7 PE=1 SV=2

Match to Query 35550: 1791.807768 from(896.911160,2+) rtinseconds(1814) index(3825)

Title: Locus:1.1.1.3151.19 File:"2013-07-02 CLN FXIII 180 min 3rd F 1.wiff"

Data file C:\Program Files (x86)\Matrix Science\Mascot Daemon\mgf9 FXIII 180 min 3rd\mascot\_daemon\_merge.mgf

Click mouse within plot area to zoom in by factor of two about that point

Or, Plot from  to  Da

Label all possible matches  Label matches used for scoring

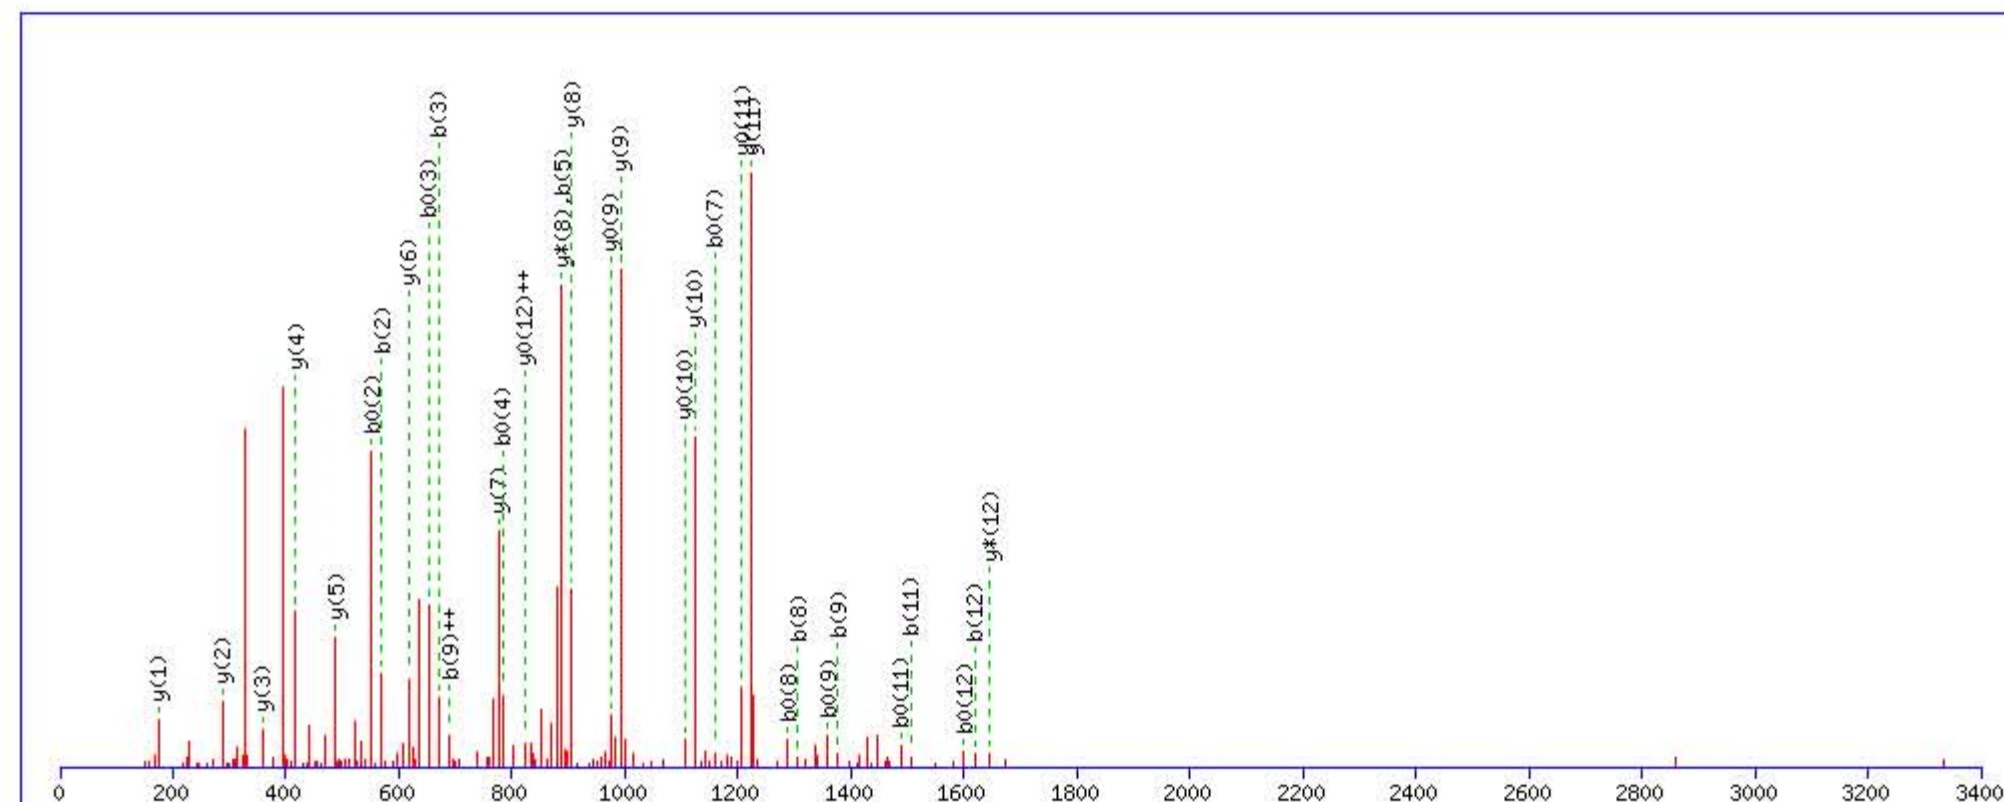

Monoisotopic mass of neutral peptide Mr(calc): 1791.795349

Fixed modifications: Carbamidomethyl (C) (apply to specified residues or termini only)

Variable modifications:

Q2 : Biotin:Thermo-21345 (Q)

Ions Score: 64 Expect: 2.3e-006

Matches : 33/132 fragment ions using 61 most intense peaks [\(help\)](#)

| #  | b                  | b <sup>++</sup>   | b <sup>*</sup> | b <sup>*++</sup> | b <sup>0</sup>     | b <sup>0++</sup> | Seq. | y                  | y <sup>++</sup> | y <sup>*</sup>     | y <sup>*++</sup> | y <sup>0</sup>     | y <sup>0++</sup>  | #  |
|----|--------------------|-------------------|----------------|------------------|--------------------|------------------|------|--------------------|-----------------|--------------------|------------------|--------------------|-------------------|----|
| 1  | 130.049869         | 65.528572         |                |                  | 112.039304         | 56.523290        | E    |                    |                 |                    |                  |                    |                   | 13 |
| 2  | <b>569.275195</b>  | 285.141236        | 552.248646     | 276.627961       | <b>551.264630</b>  | 276.135953       | Q    | 1663.760061        | 832.383668      | <b>1646.733512</b> | 823.870394       | 1645.749496        | <b>823.378386</b> | 12 |
| 3  | <b>670.322874</b>  | 335.665075        | 653.296325     | 327.151801       | <b>652.312309</b>  | 326.659793       | T    | <b>1224.534735</b> | 612.771005      | 1207.508186        | 604.257731       | <b>1206.524170</b> | 603.765723        | 11 |
| 4  | 801.363359         | 401.185318        | 784.336810     | 392.672043       | <b>783.352794</b>  | 392.180035       | M    | <b>1123.487056</b> | 562.247166      | 1106.460507        | 553.733891       | <b>1105.476491</b> | 553.241883        | 10 |
| 5  | <b>888.395387</b>  | 444.701332        | 871.368838     | 436.188057       | 870.384822         | 435.696049       | S    | <b>992.446571</b>  | 496.726923      | 975.420022         | 488.213649       | <b>974.436006</b>  | 487.721641        | 9  |
| 6  | 1017.437980        | 509.222628        | 1000.411431    | 500.709354       | 999.427415         | 500.217346       | E    | <b>905.414543</b>  | 453.210909      | <b>888.387994</b>  | 444.697635       | 887.403978         | 444.205627        | 8  |
| 7  | 1177.468629        | 589.237953        | 1160.442080    | 580.724678       | <b>1159.458064</b> | 580.232670       | C    | <b>776.371950</b>  | 388.689613      | 759.345401         | 380.176338       | 758.361385         | 379.684330        | 7  |
| 8  | <b>1306.511222</b> | 653.759249        | 1289.484673    | 645.245974       | <b>1288.500657</b> | 644.753966       | E    | <b>616.341301</b>  | 308.674288      | 599.314752         | 300.161014       | 598.330736         | 299.669006        | 6  |
| 9  | <b>1377.548336</b> | <b>689.277806</b> | 1360.521787    | 680.764531       | <b>1359.537771</b> | 680.272523       | A    | <b>487.298708</b>  | 244.152992      | 470.272159         | 235.639717       |                    |                   | 5  |
| 10 | 1434.569800        | 717.788538        | 1417.543251    | 709.275263       | 1416.559235        | 708.783255       | G    | <b>416.261594</b>  | 208.634435      | 399.235045         | 200.121160       |                    |                   | 4  |
| 11 | <b>1505.606914</b> | 753.307095        | 1488.580365    | 744.793820       | <b>1487.596349</b> | 744.301812       | A    | <b>359.240130</b>  | 180.123703      | 342.213581         | 171.610428       |                    |                   | 3  |
| 12 | <b>1618.690978</b> | 809.849127        | 1601.664429    | 801.335852       | <b>1600.680413</b> | 800.843844       | L    | <b>288.203016</b>  | 144.605146      | 271.176467         | 136.091871       |                    |                   | 2  |
| 13 |                    |                   |                |                  |                    |                  | R    | <b>175.118952</b>  | 88.063114       | 158.092403         | 79.549839        |                    |                   | 1  |

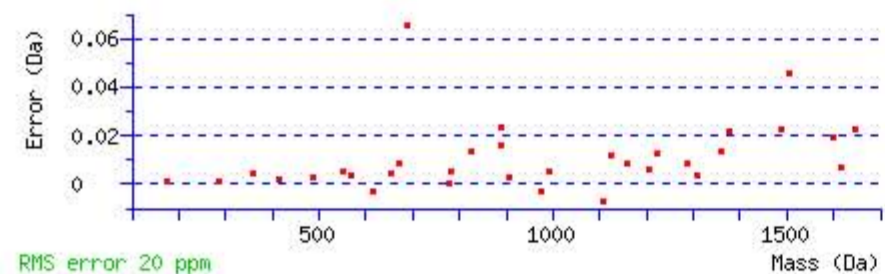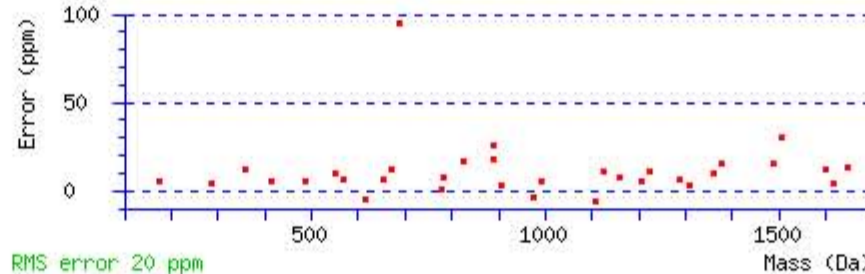

NCBI BLAST search of [EQTMSECEAGALR](#)

(Parameters: blastp, nr protein database, expect=20000, no filter, PAM30)

Other BLAST [web gateways](#)

All matches to this query

| Score | Mr(calc):   | Delta     | Sequence                      |
|-------|-------------|-----------|-------------------------------|
| 64.2  | 1791.795349 | 0.012419  | <a href="#">EQTMSECEAGALR</a> |
| 4.0   | 1791.821854 | -0.014086 | <a href="#">YNVSCIMIMPQHQ</a> |

Mascot: <http://www.matrixscience.com/>

# MASCOT Search Results

## Peptide View

MS/MS Fragmentation of **YSAWAESVTNLPQVIK**

Found in **CO7\_HUMAN**, Complement component C7 OS=Homo sapiens GN=C7 PE=1 SV=2

Match to Query 41821: 2116.119372 from(706.380400,3+) rtinseconds(2643) index(8431)

Title: Locus:1.1.1.3440.11 File:"2013-07-02 CLN FXIII 180 min 3rd F 1.wiff"

Data file C:\Program Files (x86)\Matrix Science\Mascot Daemon\mgf9 FXIII 180 min 3rd\mascot\_daemon\_merge.mgf

Click mouse within plot area to zoom in by factor of two about that point

Or, Plot from  to  Da

Label all possible matches  Label matches used for scoring

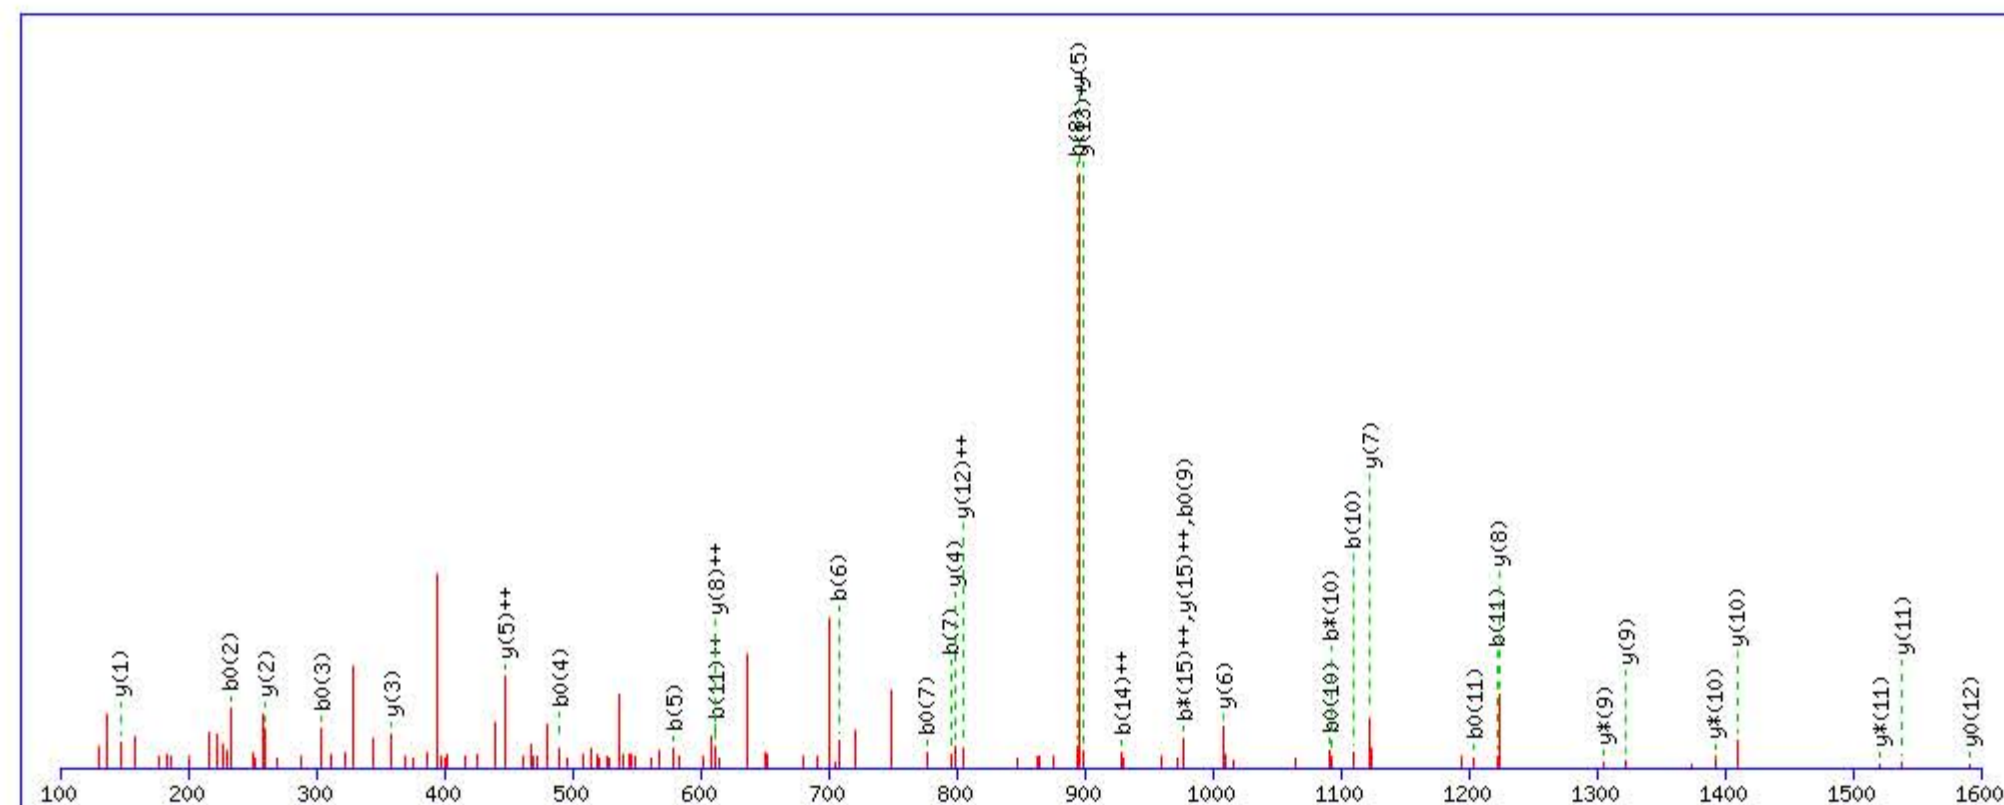

Monoisotopic mass of neutral peptide Mr(calc): 2116.102676

Fixed modifications: Carbamidomethyl (C) (apply to specified residues or termini only)

Variable modifications:

Q13 : Biotin:Thermo-21345 (Q)

Ions Score: 57 Expect: 4.8e-005

Matches : 37/146 fragment ions using 64 most intense peaks [\(help\)](#)

| #  | b           | b <sup>++</sup> | b <sup>*</sup> | b <sup>*++</sup> | b <sup>0</sup> | b <sup>0++</sup> | Seq. | y           | y <sup>++</sup> | y <sup>*</sup> | y <sup>*++</sup> | y <sup>0</sup> | y <sup>0++</sup> | #  |
|----|-------------|-----------------|----------------|------------------|----------------|------------------|------|-------------|-----------------|----------------|------------------|----------------|------------------|----|
| 1  | 164.070605  | 82.538940       |                |                  |                |                  | Y    |             |                 |                |                  |                |                  | 16 |
| 2  | 251.102633  | 126.054954      |                |                  | 233.092068     | 117.049672       | S    | 1954.046646 | 977.526961      | 1937.020097    | 969.013687       | 1936.036081    | 968.521679       | 15 |
| 3  | 322.139747  | 161.573512      |                |                  | 304.129182     | 152.568229       | A    | 1867.014618 | 934.010947      | 1849.988069    | 925.497673       | 1849.004053    | 925.005665       | 14 |
| 4  | 508.219060  | 254.613168      |                |                  | 490.208495     | 245.607886       | W    | 1795.977504 | 898.492390      | 1778.950955    | 889.979116       | 1777.966939    | 889.487108       | 13 |
| 5  | 579.256174  | 290.131725      |                |                  | 561.245609     | 281.126443       | A    | 1609.898191 | 805.452734      | 1592.871642    | 796.939459       | 1591.887626    | 796.447451       | 12 |
| 6  | 708.298767  | 354.653022      |                |                  | 690.288202     | 345.647739       | E    | 1538.861077 | 769.934177      | 1521.834528    | 761.420902       | 1520.850512    | 760.928894       | 11 |
| 7  | 795.330795  | 398.169036      |                |                  | 777.320230     | 389.163753       | S    | 1409.818484 | 705.412880      | 1392.791935    | 696.899606       | 1391.807919    | 696.407598       | 10 |
| 8  | 894.399209  | 447.703243      |                |                  | 876.388644     | 438.697960       | V    | 1322.786456 | 661.896866      | 1305.759907    | 653.383592       | 1304.775891    | 652.891584       | 9  |
| 9  | 995.446888  | 498.227082      |                |                  | 977.436323     | 489.221800       | T    | 1223.718042 | 612.362659      | 1206.691493    | 603.849385       | 1205.707477    | 603.357377       | 8  |
| 10 | 1109.489815 | 555.248546      | 1092.463266    | 546.735271       | 1091.479250    | 546.243263       | N    | 1122.670363 | 561.838820      | 1105.643814    | 553.325545       |                |                  | 7  |
| 11 | 1222.573879 | 611.790578      | 1205.547330    | 603.277303       | 1204.563314    | 602.785295       | L    | 1008.627436 | 504.817356      | 991.600887     | 496.304082       |                |                  | 6  |
| 12 | 1319.626643 | 660.316960      | 1302.600094    | 651.803685       | 1301.616078    | 651.311677       | P    | 895.543372  | 448.275324      | 878.516823     | 439.762050       |                |                  | 5  |
| 13 | 1758.851969 | 879.929623      | 1741.825420    | 871.416348       | 1740.841404    | 870.924340       | Q    | 798.490608  | 399.748942      | 781.464059     | 391.235668       |                |                  | 4  |
| 14 | 1857.920383 | 929.463830      | 1840.893834    | 920.950555       | 1839.909818    | 920.458547       | V    | 359.265282  | 180.136279      | 342.238733     | 171.623004       |                |                  | 3  |
| 15 | 1971.004447 | 986.005862      | 1953.977898    | 977.492587       | 1952.993882    | 977.000579       | I    | 260.196868  | 130.602072      | 243.170319     | 122.088797       |                |                  | 2  |
| 16 |             |                 |                |                  |                |                  | K    | 147.112804  | 74.060040       | 130.086255     | 65.546765        |                |                  | 1  |

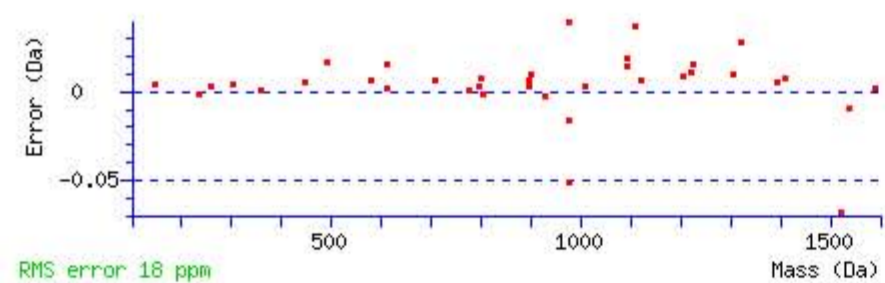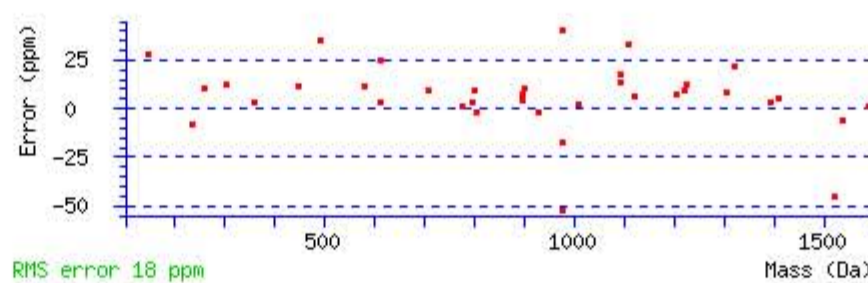

NCBI BLAST search of **YSAWAESVTNLPQVIK**

(Parameters: blastp, nr protein database, expect=20000, no filter, PAM30)

Other BLAST [web gateways](#)

All matches to this query

| Score | Mr(calc):   | Delta    | Sequence                         |
|-------|-------------|----------|----------------------------------|
| 57.3  | 2116.102676 | 0.016696 | <a href="#">YSAWAESVTNLPQVIK</a> |

Mascot: <http://www.matrixscience.com/>

# MASCOT Search Results

## Peptide View

MS/MS Fragmentation of **MPYECGPSLDVCAQDER**

Found in **CO7\_HUMAN**, Complement component C7 OS=Homo sapiens GN=C7 PE=1 SV=2

Match to Query 45706: 2337.003942 from(780.008590,3+) rtinseconds(2175) index(5857)

Title: Locus:1.1.1.3277.22 File:"2013-07-02 CLN FXIII 180 min 3rd F 1.wiff"

Data file C:\Program Files (x86)\Matrix Science\Mascot Daemon\mgf\9 FXIII 180 min 3rd\mascot\_daemon\_merge.mgf

Click mouse within plot area to zoom in by factor of two about that point

Or, Plot from  to  Da

Label all possible matches  Label matches used for scoring

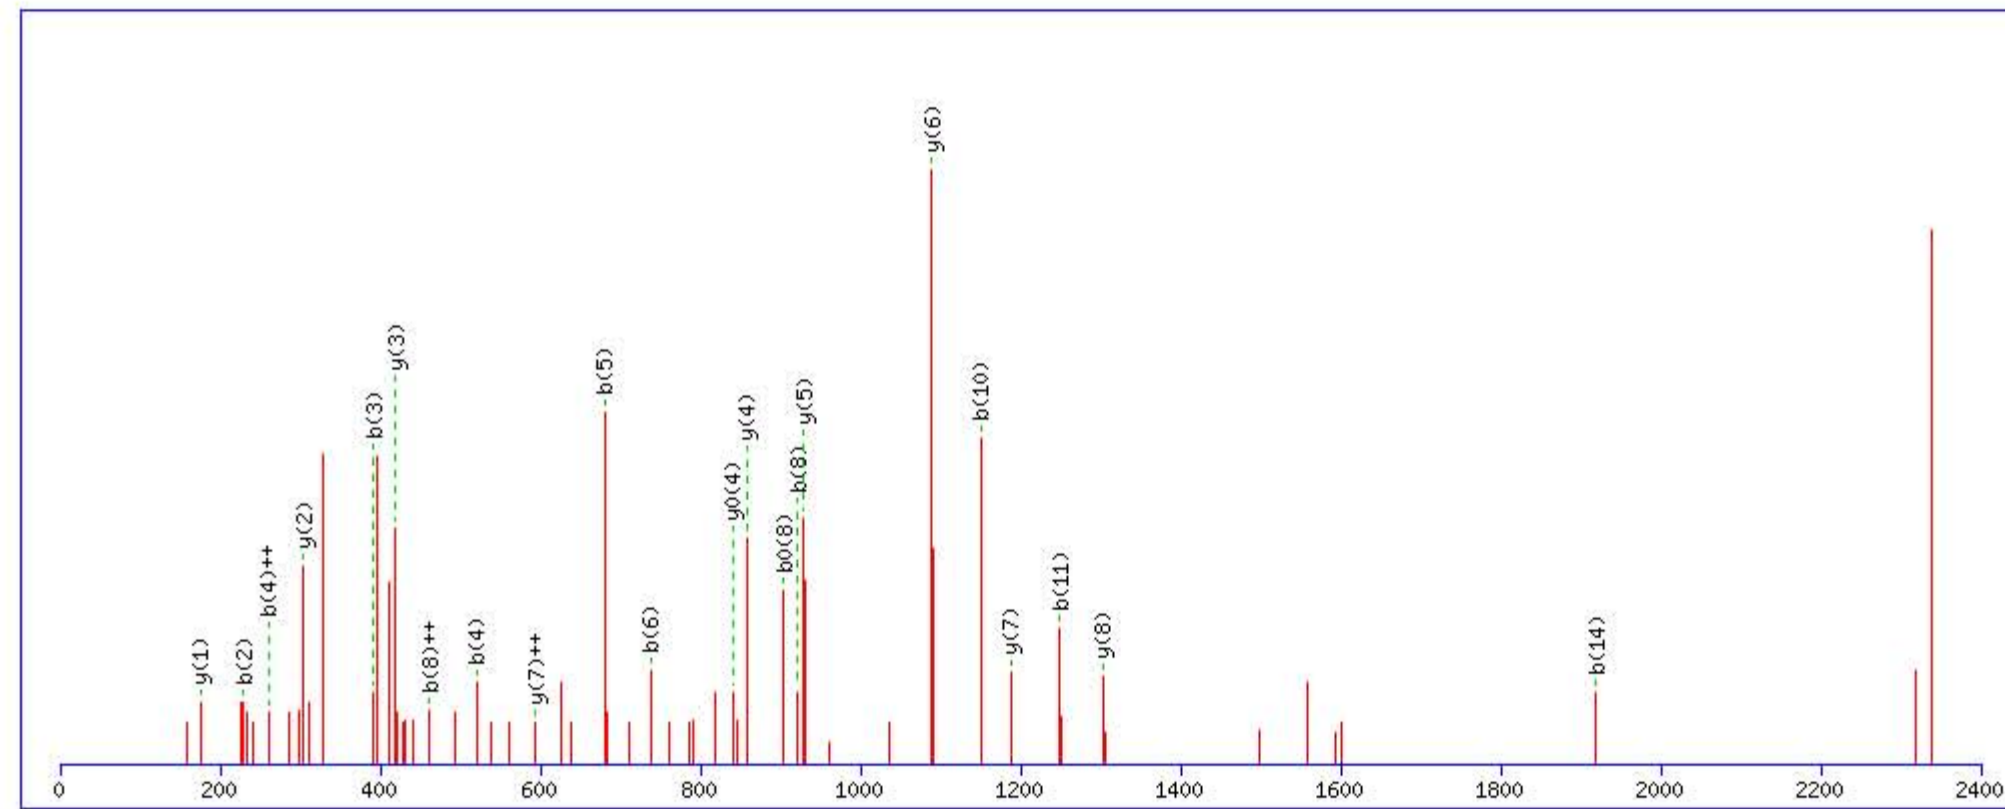

Monoisotopic mass of neutral peptide Mr(calc): 2336.989792

Fixed modifications: Carbamidomethyl (C) (apply to specified residues or termini only)

Variable modifications:

Q14 : Biotin:Thermo-21345 (Q)

Ions Score: 45 Expect: 0.00011

Matches : 22/158 fragment ions using 57 most intense peaks [\(help\)](#)

| #  | b                  | b <sup>++</sup>   | b <sup>*</sup> | b <sup>*++</sup> | b <sup>0</sup>    | b <sup>0++</sup> | Seq. | y                  | y <sup>++</sup>   | y <sup>*</sup> | y <sup>*++</sup> | y <sup>0</sup>    | y <sup>0++</sup> | #  |
|----|--------------------|-------------------|----------------|------------------|-------------------|------------------|------|--------------------|-------------------|----------------|------------------|-------------------|------------------|----|
| 1  | 132.047761         | 66.527518         |                |                  |                   |                  | M    |                    |                   |                |                  |                   |                  | 17 |
| 2  | <b>229.100525</b>  | 115.053900        |                |                  |                   |                  | P    | 2206.956589        | 1103.981932       | 2189.930040    | 1095.468658      | 2188.946024       | 1094.976650      | 16 |
| 3  | <b>392.163854</b>  | 196.585565        |                |                  |                   |                  | Y    | 2109.903825        | 1055.455550       | 2092.877276    | 1046.942276      | 2091.893260       | 1046.450268      | 15 |
| 4  | <b>521.206447</b>  | <b>261.106862</b> |                |                  | 503.195882        | 252.101579       | E    | 1946.840496        | 973.923886        | 1929.813947    | 965.410612       | 1928.829931       | 964.918604       | 14 |
| 5  | <b>681.237096</b>  | 341.122186        |                |                  | 663.226531        | 332.116904       | C    | 1817.797903        | 909.402590        | 1800.771354    | 900.889315       | 1799.787338       | 900.397307       | 13 |
| 6  | <b>738.258560</b>  | 369.632918        |                |                  | 720.247995        | 360.627636       | G    | 1657.767254        | 829.387265        | 1640.740705    | 820.873991       | 1639.756689       | 820.381983       | 12 |
| 7  | 835.311324         | 418.159300        |                |                  | 817.300759        | 409.154018       | P    | 1600.745790        | 800.876533        | 1583.719241    | 792.363259       | 1582.735225       | 791.871251       | 11 |
| 8  | <b>922.343352</b>  | <b>461.675314</b> |                |                  | <b>904.332787</b> | 452.670032       | S    | 1503.693026        | 752.350151        | 1486.666477    | 743.836877       | 1485.682461       | 743.344869       | 10 |
| 9  | 1035.427416        | 518.217346        |                |                  | 1017.416851       | 509.212064       | L    | 1416.660998        | 708.834137        | 1399.634449    | 700.320863       | 1398.650433       | 699.828855       | 9  |
| 10 | <b>1150.454359</b> | 575.730818        |                |                  | 1132.443794       | 566.725535       | D    | <b>1303.576934</b> | 652.292105        | 1286.550385    | 643.778831       | 1285.566369       | 643.286823       | 8  |
| 11 | <b>1249.522773</b> | 625.265025        |                |                  | 1231.512208       | 616.259742       | V    | <b>1188.549991</b> | <b>594.778634</b> | 1171.523442    | 586.265359       | 1170.539426       | 585.773351       | 7  |
| 12 | 1409.553422        | 705.280349        |                |                  | 1391.542857       | 696.275067       | C    | <b>1089.481577</b> | 545.244427        | 1072.455028    | 536.731152       | 1071.471012       | 536.239144       | 6  |
| 13 | 1480.590536        | 740.798906        |                |                  | 1462.579971       | 731.793624       | A    | <b>929.450928</b>  | 465.229102        | 912.424379     | 456.715827       | 911.440363        | 456.223819       | 5  |
| 14 | <b>1919.815862</b> | 960.411569        | 1902.789313    | 951.898295       | 1901.805297       | 951.406287       | Q    | <b>858.413814</b>  | 429.710545        | 841.387265     | 421.197271       | <b>840.403249</b> | 420.705263       | 4  |
| 15 | 2034.842805        | 1017.925041       | 2017.816256    | 1009.411766      | 2016.832240       | 1008.919758      | D    | <b>419.188488</b>  | 210.097882        | 402.161939     | 201.584607       | 401.177923        | 201.092599       | 3  |
| 16 | 2163.885398        | 1082.446337       | 2146.858849    | 1073.933062      | 2145.874833       | 1073.441054      | E    | <b>304.161545</b>  | 152.584410        | 287.134996     | 144.071136       | 286.150980        | 143.579128       | 2  |
| 17 |                    |                   |                |                  |                   |                  | R    | <b>175.118952</b>  | 88.063114         | 158.092403     | 79.549839        |                   |                  | 1  |

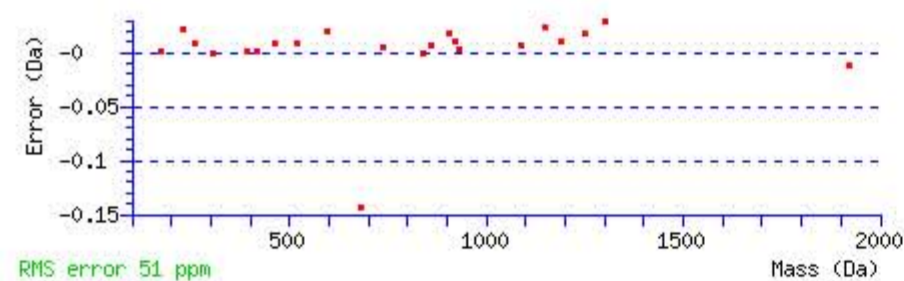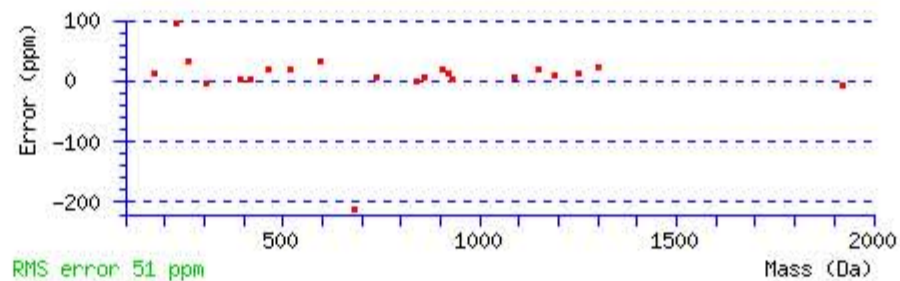

NCBI BLAST search of [MPYECGPSLDVCAQDER](#)

(Parameters: blastp, nr protein database, expect=20000, no filter, PAM30)

Other BLAST [web gateways](#)

## All matches to this query

| Score | Mr(calc):   | Delta    | Sequence                          |
|-------|-------------|----------|-----------------------------------|
| 45.2  | 2336.989792 | 0.014150 | <a href="#">MPYECGPSLDVCAQDER</a> |

Mascot: <http://www.matrixscience.com/>

# MASCOT Search Results

## Peptide View

MS/MS Fragmentation of **LIDQYGTHYLQSGSLGGEYR**  
 Found in **CO7\_HUMAN**, Complement component C7 OS=Homo sapiens GN=C7 PE=1 SV=2

Match to Query 49158: 2567.271522 from(856.764450,3+) rtinseconds(2187) index(5917)  
 Title: Locus:1.1.1.3281.15 File:"2013-07-02 CLN FXIII 180 min 3rd F 1.wiff"  
 Data file C:\Program Files (x86)\Matrix Science\Mascot Daemon\mgf9 FXIII 180 min 3rd\mascot\_daemon\_merge.mgf

Click mouse within plot area to zoom in by factor of two about that point  
 Or, Plot from  to  Da   
 Label all possible matches  Label matches used for scoring

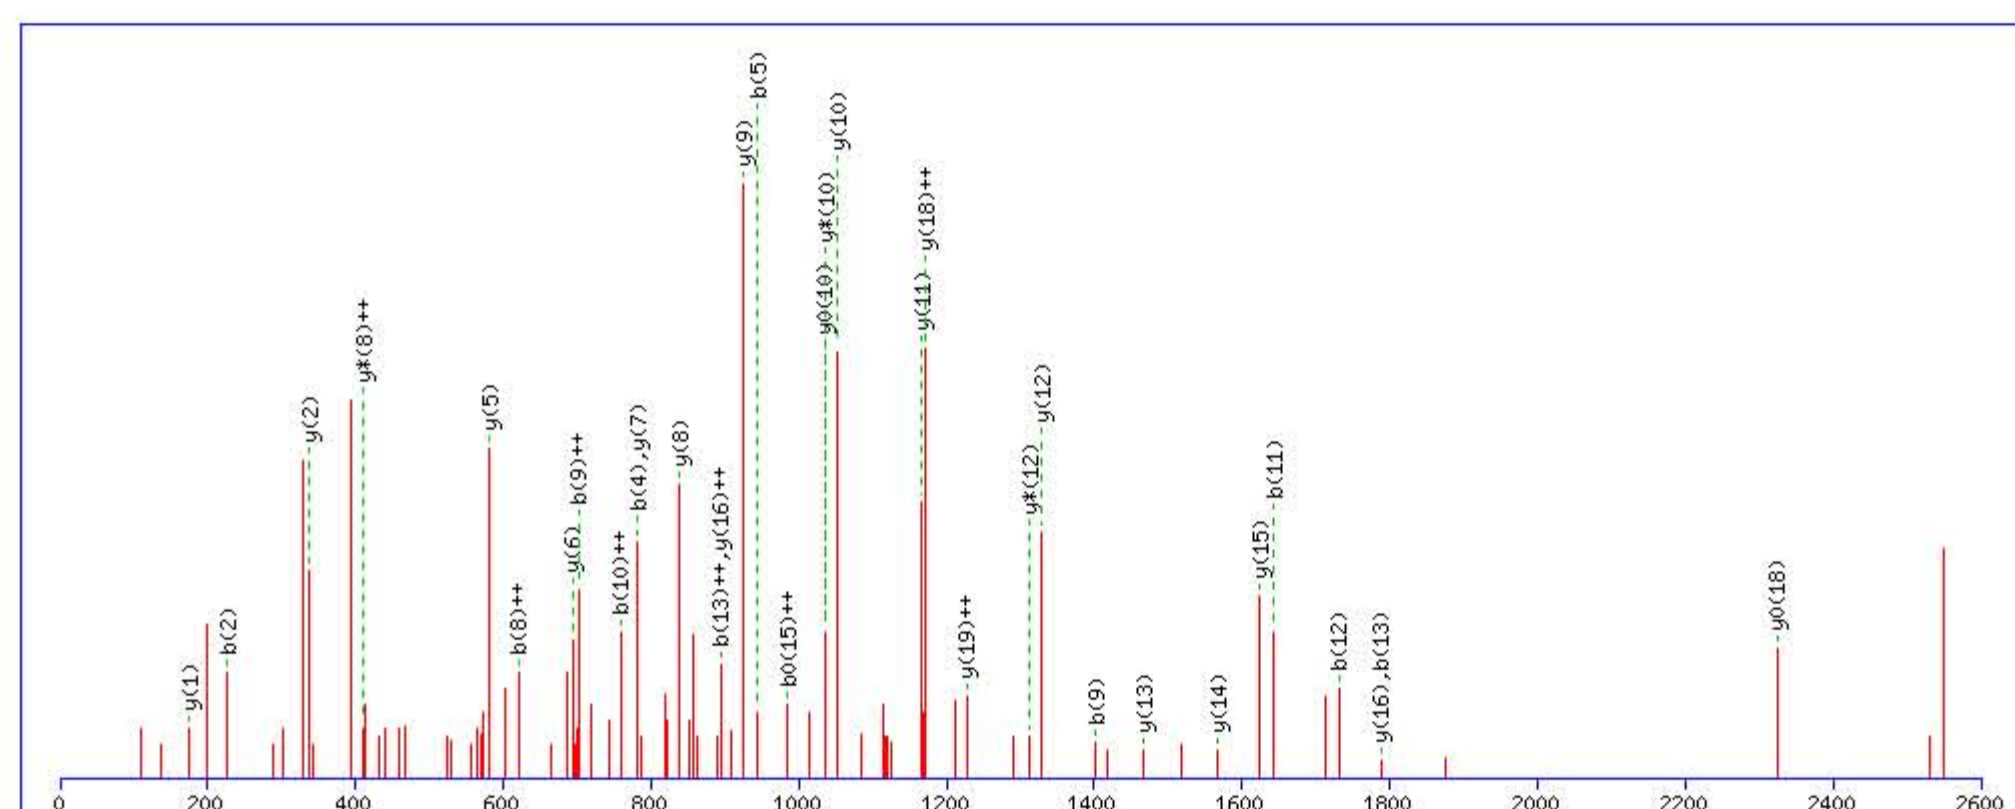

Monoisotopic mass of neutral peptide Mr(calc): 2567.247849  
 Fixed modifications: Carbamidomethyl (C) (apply to specified residues or termini only)  
 Variable modifications:  
 Q4 : Biotin:Thermo-21345 (Q)  
 Ions Score: 92 Expect: 4.9e-009  
 Matches : 34/214 fragment ions using 52 most intense peaks [\(help\)](#)

| #  | b                  | b <sup>++</sup>   | b <sup>*</sup> | b <sup>*++</sup> | b <sup>0</sup> | b <sup>0++</sup>  | Seq. | y                  | y <sup>++</sup>    | y <sup>*</sup>     | y <sup>*++</sup>  | y <sup>0</sup>     | y <sup>0++</sup> | #  |
|----|--------------------|-------------------|----------------|------------------|----------------|-------------------|------|--------------------|--------------------|--------------------|-------------------|--------------------|------------------|----|
| 1  | 114.091340         | 57.549308         |                |                  |                |                   | L    |                    |                    |                    |                   |                    |                  | 20 |
| 2  | <b>227.175404</b>  | 114.091340        |                |                  |                |                   | I    | 2455.171074        | <b>1228.089175</b> | 2438.144525        | 1219.575900       | 2437.160509        | 1219.083892      | 19 |
| 3  | 342.202347         | 171.604811        |                |                  | 324.191782     | 162.599529        | D    | 2342.087010        | <b>1171.547143</b> | 2325.060461        | 1163.033868       | <b>2324.076445</b> | 1162.541860      | 18 |
| 4  | <b>781.427673</b>  | 391.217475        | 764.401124     | 382.704200       | 763.417108     | 382.212192        | Q    | 2227.060067        | 1114.033671        | 2210.033518        | 1105.520397       | 2209.049502        | 1105.028389      | 17 |
| 5  | <b>944.491002</b>  | 472.749139        | 927.464453     | 464.235864       | 926.480437     | 463.743856        | Y    | <b>1787.834741</b> | <b>894.421009</b>  | 1770.808192        | 885.907734        | 1769.824176        | 885.415726       | 16 |
| 6  | 1001.512466        | 501.259871        | 984.485917     | 492.746597       | 983.501901     | 492.254589        | G    | <b>1624.771412</b> | 812.889344         | 1607.744863        | 804.376070        | 1606.760847        | 803.884062       | 15 |
| 7  | 1102.560145        | 551.783710        | 1085.533596    | 543.270436       | 1084.549580    | 542.778428        | T    | <b>1567.749948</b> | 784.378612         | 1550.723399        | 775.865338        | 1549.739383        | 775.373330       | 14 |
| 8  | 1239.619057        | <b>620.313166</b> | 1222.592508    | 611.799892       | 1221.608492    | 611.307884        | H    | <b>1466.702269</b> | 733.854773         | 1449.675720        | 725.341498        | 1448.691704        | 724.849490       | 13 |
| 9  | <b>1402.682386</b> | <b>701.844831</b> | 1385.655837    | 693.331557       | 1384.671821    | 692.839548        | Y    | <b>1329.643357</b> | 665.325317         | <b>1312.616808</b> | 656.812042        | 1311.632792        | 656.320034       | 12 |
| 10 | 1515.766450        | <b>758.386863</b> | 1498.739901    | 749.873588       | 1497.755885    | 749.381580        | L    | <b>1166.580028</b> | 583.793652         | 1149.553479        | 575.280378        | 1148.569463        | 574.788370       | 11 |
| 11 | <b>1643.825028</b> | 822.416152        | 1626.798479    | 813.902878       | 1625.814463    | 813.410869        | Q    | <b>1053.495964</b> | 527.251620         | <b>1036.469415</b> | 518.738346        | <b>1035.485399</b> | 518.246338       | 10 |
| 12 | <b>1730.857056</b> | 865.932166        | 1713.830507    | 857.418892       | 1712.846491    | 856.926884        | S    | <b>925.437386</b>  | 463.222331         | 908.410837         | 454.709057        | 907.426821         | 454.217049       | 9  |
| 13 | <b>1787.878520</b> | <b>894.442898</b> | 1770.851971    | 885.929624       | 1769.867955    | 885.437615        | G    | <b>838.405358</b>  | 419.706317         | 821.378809         | <b>411.193043</b> | 820.394793         | 410.701035       | 8  |
| 14 | 1874.910548        | 937.958912        | 1857.883999    | 929.445638       | 1856.899983    | 928.953630        | S    | <b>781.383894</b>  | 391.195585         | 764.357345         | 382.682311        | 763.373329         | 382.190303       | 7  |
| 15 | 1987.994612        | 994.500944        | 1970.968063    | 985.987670       | 1969.984047    | <b>985.495661</b> | L    | <b>694.351866</b>  | 347.679571         | 677.325317         | 339.166297        | 676.341301         | 338.674289       | 6  |
| 16 | 2045.016076        | 1023.011676       | 2027.989527    | 1014.498402      | 2027.005511    | 1014.006393       | G    | <b>581.267802</b>  | 291.137539         | 564.241253         | 282.624265        | 563.257237         | 282.132257       | 5  |
| 17 | 2102.037540        | 1051.522408       | 2085.010991    | 1043.009133      | 2084.026975    | 1042.517125       | G    | 524.246338         | 262.626807         | 507.219789         | 254.113533        | 506.235773         | 253.621525       | 4  |
| 18 | 2231.080133        | 1116.043704       | 2214.053584    | 1107.530430      | 2213.069568    | 1107.038422       | E    | 467.224874         | 234.116075         | 450.198325         | 225.602801        | 449.214309         | 225.110793       | 3  |
| 19 | 2394.143462        | 1197.575369       | 2377.116913    | 1189.062094      | 2376.132897    | 1188.570086       | Y    | <b>338.182281</b>  | 169.594778         | 321.155732         | 161.081504        |                    |                  | 2  |
| 20 |                    |                   |                |                  |                |                   | R    | <b>175.118952</b>  | 88.063114          | 158.092403         | 79.549839         |                    |                  | 1  |

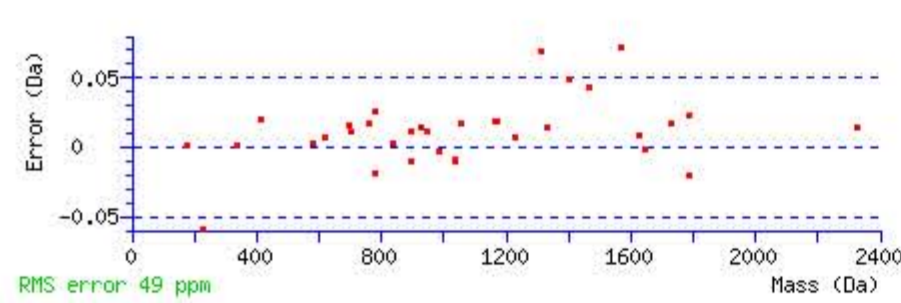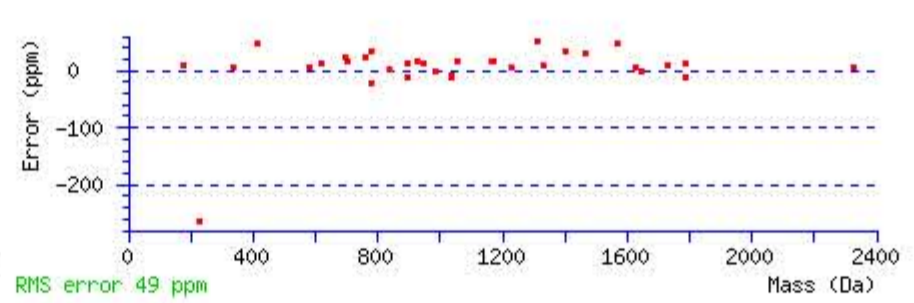

NCBI BLAST search of **LIDQYGTHYLQSGSLGGEYR**  
 (Parameters: blastp, nr protein database, expect=20000, no filter, PAM30)  
 Other BLAST [web gateways](#)

### All matches to this query

| Score | Mr(calc):   | Delta     | Sequence                             |
|-------|-------------|-----------|--------------------------------------|
| 91.8  | 2567.247849 | 0.023673  | <a href="#">LIDQYGTHYLQSGSLGGEYR</a> |
| 14.8  | 2567.247849 | 0.023673  | <a href="#">LIDQYGTHYLQSGSLGGEYR</a> |
| 3.2   | 2567.294800 | -0.023278 | <a href="#">LLSDGQQHLTESLREKCSR</a>  |

**MASCOT** Mascot Search Results

**Peptide View**

MS/MS Fragmentation of **LIDQYGTHYLQSGSLGGEYR**  
 Found in **CO7\_HUMAN**, Complement component C7 OS=Homo sapiens GN=C7 PE=1 SV=2

Match to Query 49160: 2567.278482 from(856.766770,3+) rtinseconds(2167) index(5807)  
 Title: Locus:1.1.1.3274.15 File:"2013-07-02 CLN FXIII 180 min 3rd F 1.wiff"  
 Data file C:\Program Files (x86)\Matrix Science\Mascot Daemon\mgf9 FXIII 180 min 3rd\mascot\_daemon\_merge.mgf

Click mouse within plot area to zoom in by factor of two about that point  
 Or, Plot from  to  Da   
 Label all possible matches  Label matches used for scoring

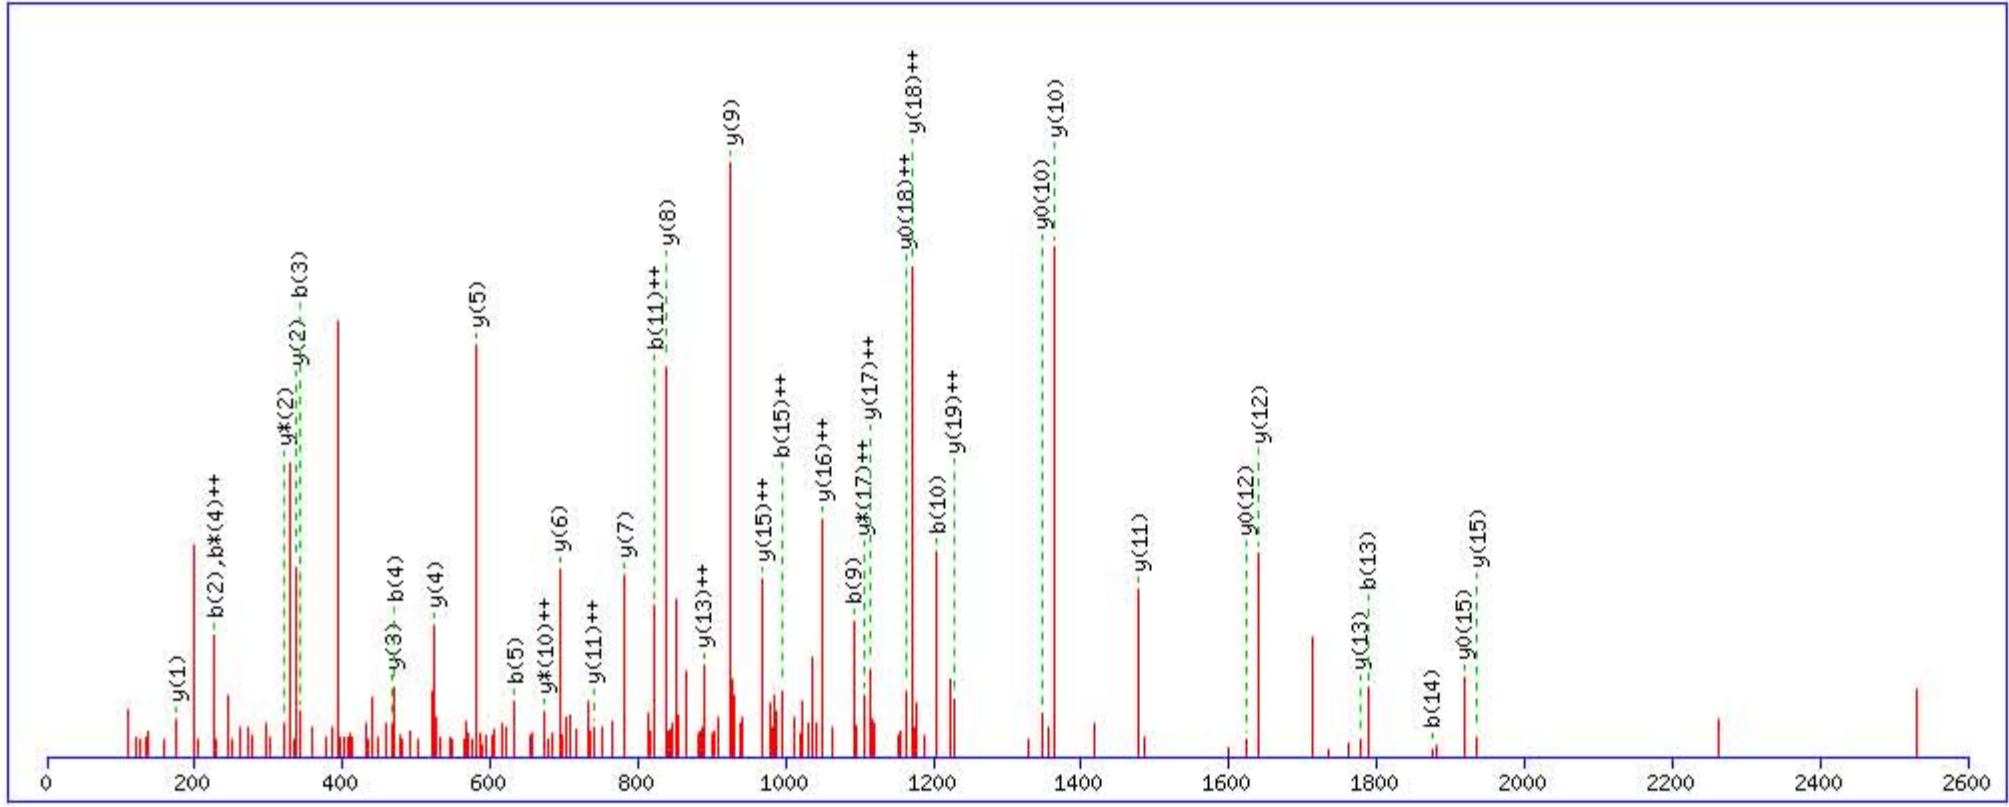

Monoisotopic mass of neutral peptide Mr(calc): 2567.247849  
 Fixed modifications: Carbamidomethyl (C) (apply to specified residues or termini only)  
 Variable modifications:  
 Q11 : Biotin:Thermo-21345 (Q)  
 Ions Score: 70 Expect: 3.1e-006  
 Matches : 39/214 fragment ions using 80 most intense peaks [\(help\)](#)

| #  | b           | b <sup>++</sup> | b <sup>*</sup> | b <sup>*++</sup> | b <sup>0</sup> | b <sup>0++</sup> | Seq. | y           | y <sup>++</sup> | y <sup>*</sup> | y <sup>*++</sup> | y <sup>0</sup> | y <sup>0++</sup> | #  |
|----|-------------|-----------------|----------------|------------------|----------------|------------------|------|-------------|-----------------|----------------|------------------|----------------|------------------|----|
| 1  | 114.091340  | 57.549308       |                |                  |                |                  | L    |             |                 |                |                  |                |                  | 20 |
| 2  | 227.175404  | 114.091340      |                |                  |                |                  | I    | 2455.171074 | 1228.089175     | 2438.144525    | 1219.575900      | 2437.160509    | 1219.083892      | 19 |
| 3  | 342.202347  | 171.604811      |                |                  | 324.191782     | 162.599529       | D    | 2342.087010 | 1171.547143     | 2325.060461    | 1163.033868      | 2324.076445    | 1162.541860      | 18 |
| 4  | 470.260925  | 235.634100      | 453.234376     | 227.120826       | 452.250360     | 226.628818       | Q    | 2227.060067 | 1114.033671     | 2210.033518    | 1105.520397      | 2209.049502    | 1105.028389      | 17 |
| 5  | 633.324254  | 317.165765      | 616.297705     | 308.652491       | 615.313689     | 308.160483       | Y    | 2099.001489 | 1050.004382     | 2081.974940    | 1041.491108      | 2080.990924    | 1040.999100      | 16 |
| 6  | 690.345718  | 345.676497      | 673.319169     | 337.163223       | 672.335153     | 336.671215       | G    | 1935.938160 | 968.472718      | 1918.911611    | 959.959444       | 1917.927595    | 959.467436       | 15 |
| 7  | 791.393397  | 396.200337      | 774.366848     | 387.687062       | 773.382832     | 387.195054       | T    | 1878.916696 | 939.961986      | 1861.890147    | 931.448712       | 1860.906131    | 930.956704       | 14 |
| 8  | 928.452309  | 464.729793      | 911.425760     | 456.216518       | 910.441744     | 455.724510       | H    | 1777.869017 | 889.438147      | 1760.842468    | 880.924872       | 1759.858452    | 880.432864       | 13 |
| 9  | 1091.515638 | 546.261457      | 1074.489089    | 537.748183       | 1073.505073    | 537.256175       | Y    | 1640.810105 | 820.908691      | 1623.783556    | 812.395416       | 1622.799540    | 811.903408       | 12 |
| 10 | 1204.599702 | 602.803489      | 1187.573153    | 594.290215       | 1186.589137    | 593.798206       | L    | 1477.746776 | 739.377026      | 1460.720227    | 730.863752       | 1459.736211    | 730.371744       | 11 |
| 11 | 1643.825028 | 822.416152      | 1626.798479    | 813.902878       | 1625.814463    | 813.410869       | Q    | 1364.662712 | 682.834994      | 1347.636163    | 674.321720       | 1346.652147    | 673.829712       | 10 |
| 12 | 1730.857056 | 865.932166      | 1713.830507    | 857.418892       | 1712.846491    | 856.926884       | S    | 925.437386  | 463.222331      | 908.410837     | 454.709057       | 907.426821     | 454.217049       | 9  |
| 13 | 1787.878520 | 894.442898      | 1770.851971    | 885.929624       | 1769.867955    | 885.437615       | G    | 838.405358  | 419.706317      | 821.378809     | 411.193043       | 820.394793     | 410.701035       | 8  |
| 14 | 1874.910548 | 937.958912      | 1857.883999    | 929.445638       | 1856.899983    | 928.953630       | S    | 781.383894  | 391.195585      | 764.357345     | 382.682311       | 763.373329     | 382.190303       | 7  |
| 15 | 1987.994612 | 994.500944      | 1970.968063    | 985.987670       | 1969.984047    | 985.495661       | L    | 694.351866  | 347.679571      | 677.325317     | 339.166297       | 676.341301     | 338.674289       | 6  |
| 16 | 2045.016076 | 1023.011676     | 2027.989527    | 1014.498402      | 2027.005511    | 1014.006393      | G    | 581.267802  | 291.137539      | 564.241253     | 282.624265       | 563.257237     | 282.132257       | 5  |
| 17 | 2102.037540 | 1051.522408     | 2085.010991    | 1043.009133      | 2084.026975    | 1042.517125      | G    | 524.246338  | 262.626807      | 507.219789     | 254.113533       | 506.235773     | 253.621525       | 4  |
| 18 | 2231.080133 | 1116.043704     | 2214.053584    | 1107.530430      | 2213.069568    | 1107.038422      | E    | 467.224874  | 234.116075      | 450.198325     | 225.602801       | 449.214309     | 225.110793       | 3  |
| 19 | 2394.143462 | 1197.575369     | 2377.116913    | 1189.062094      | 2376.132897    | 1188.570086      | Y    | 338.182281  | 169.594778      | 321.155732     | 161.081504       |                |                  | 2  |
| 20 |             |                 |                |                  |                |                  | R    | 175.118952  | 88.063114       | 158.092403     | 79.549839        |                |                  | 1  |

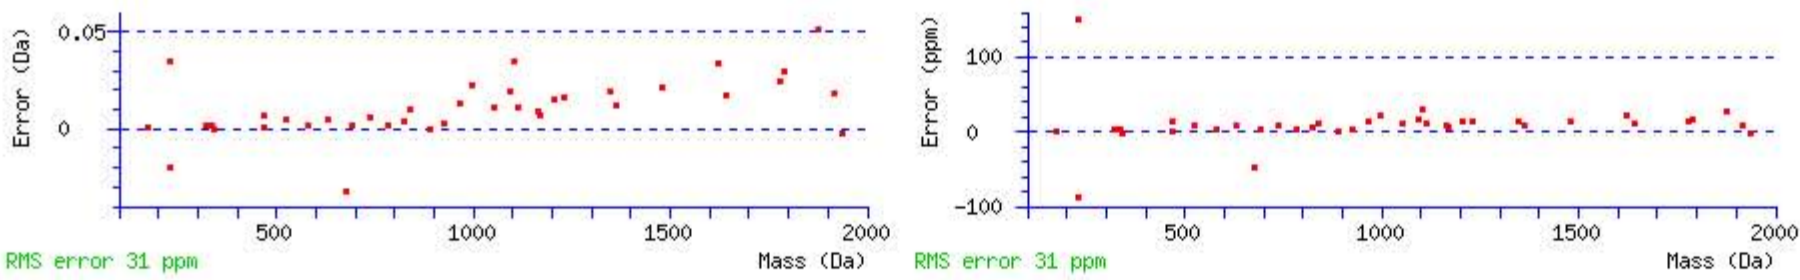

NCBI BLAST search of **LIDQYGTHYLQSGSLGGEYR**  
 (Parameters: blastp, nr protein database, expect=20000, no filter, PAM30)  
 Other BLAST [web gateways](#)

All matches to this query

| Score | Mr(calc):   | Delta    | Sequence                             |
|-------|-------------|----------|--------------------------------------|
| 69.6  | 2567.247849 | 0.030633 | <a href="#">LIDQYGTHYLQSGSLGGEYR</a> |
| 27.5  | 2567.247849 | 0.030633 | <a href="#">LIDQYGTHYLQSGSLGGEYR</a> |



# Mascot Search Results

## Peptide View

MS/MS Fragmentation of **SCVGETTESTQCEDEELEHLR**

Found in **CO7\_HUMAN**, Complement component C7 OS=Homo sapiens GN=C7 PE=1 SV=2

Match to Query 51787: 2819.214376 from(705.810870,4+) rtinseconds(1963) index(4569)

Title: Locus:1.1.1.3203.22 File:"2013-07-02 CLN FXIII 180 min 3rd F 1.wiff"

Data file C:\Program Files (x86)\Matrix Science\Mascot Daemon\mgf9 FXIII 180 min 3rd\mascot\_daemon\_merge.mgf

Click mouse within plot area to zoom in by factor of two about that point

Or, Plot from  to  Da

Label all possible matches  Label matches used for scoring

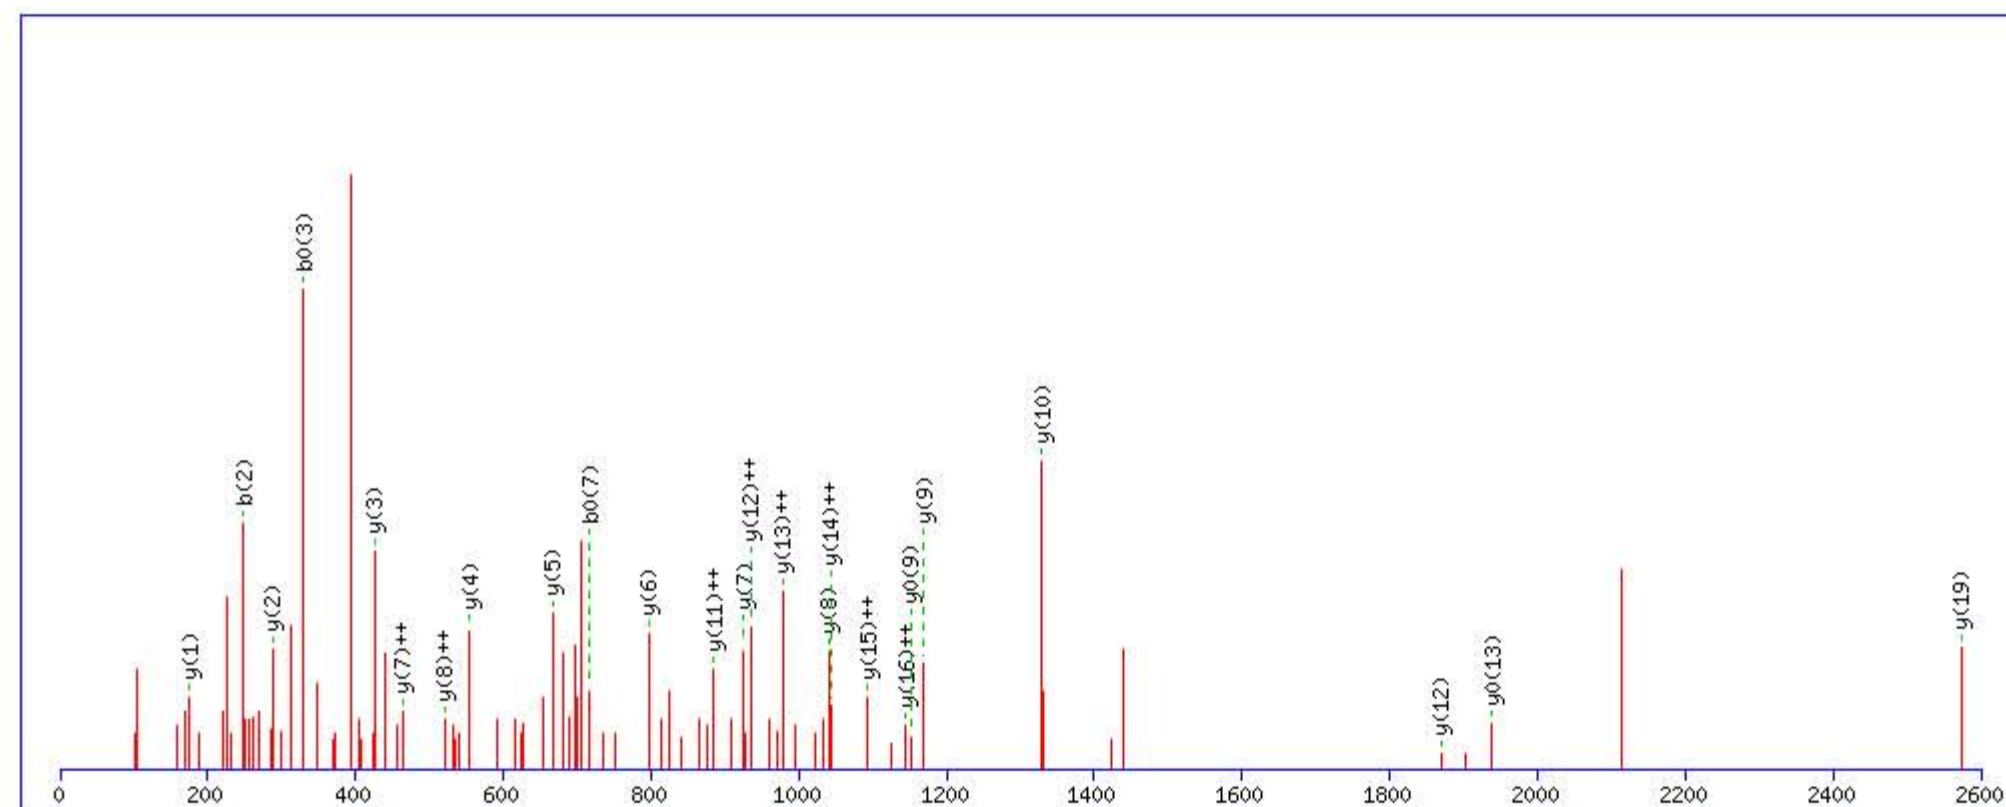

Monoisotopic mass of neutral peptide Mr(calc): 2819.204803

Fixed modifications: Carbamidomethyl (C) (apply to specified residues or termini only)

Variable modifications:

Q11 : Biotin:Thermo-21345 (Q)

Ions Score: 72 Expect: 2.2e-007

Matches : 25/214 fragment ions using 43 most intense peaks [\(help\)](#)

| #  | b                 | b <sup>++</sup> | b <sup>*</sup> | b <sup>*++</sup> | b <sup>0</sup>    | b <sup>0++</sup> | Seq. | y                  | y <sup>++</sup>    | y <sup>*</sup> | y <sup>*++</sup> | y <sup>0</sup>     | y <sup>0++</sup> | #  |
|----|-------------------|-----------------|----------------|------------------|-------------------|------------------|------|--------------------|--------------------|----------------|------------------|--------------------|------------------|----|
| 1  | 88.039304         | 44.523290       |                |                  | 70.028739         | 35.518008        | S    |                    |                    |                |                  |                    |                  | 21 |
| 2  | <b>248.069953</b> | 124.538614      |                |                  | 230.059388        | 115.533332       | C    | 2733.180060        | 1367.093668        | 2716.153511    | 1358.580393      | 2715.169495        | 1358.088385      | 20 |
| 3  | 347.138367        | 174.072822      |                |                  | <b>329.127802</b> | 165.067539       | V    | <b>2573.149411</b> | 1287.078343        | 2556.122862    | 1278.565069      | 2555.138846        | 1278.073061      | 19 |
| 4  | 404.159831        | 202.583553      |                |                  | 386.149266        | 193.578271       | G    | 2474.080997        | 1237.544136        | 2457.054448    | 1229.030862      | 2456.070432        | 1228.538854      | 18 |
| 5  | 533.202424        | 267.104850      |                |                  | 515.191859        | 258.099568       | E    | 2417.059533        | 1209.033404        | 2400.032984    | 1200.520130      | 2399.048968        | 1200.028122      | 17 |
| 6  | 634.250103        | 317.628690      |                |                  | 616.239538        | 308.623407       | T    | 2288.016940        | <b>1144.512108</b> | 2270.990391    | 1135.998833      | 2270.006375        | 1135.506825      | 16 |
| 7  | 735.297782        | 368.152529      |                |                  | <b>717.287217</b> | 359.147247       | T    | 2186.969261        | <b>1093.988268</b> | 2169.942712    | 1085.474994      | 2168.958696        | 1084.982986      | 15 |
| 8  | 864.340375        | 432.673826      |                |                  | 846.329810        | 423.668543       | E    | 2085.921582        | <b>1043.464429</b> | 2068.895033    | 1034.951154      | 2067.911017        | 1034.459146      | 14 |
| 9  | 951.372403        | 476.189840      |                |                  | 933.361838        | 467.184557       | S    | 1956.878989        | <b>978.943133</b>  | 1939.852440    | 970.429858       | <b>1938.868424</b> | 969.937850       | 13 |
| 10 | 1052.420082       | 526.713679      |                |                  | 1034.409517       | 517.708397       | T    | <b>1869.846961</b> | <b>935.427119</b>  | 1852.820412    | 926.913844       | 1851.836396        | 926.421836       | 12 |
| 11 | 1491.645408       | 746.326342      | 1474.618859    | 737.813068       | 1473.634843       | 737.321060       | Q    | 1768.799282        | <b>884.903279</b>  | 1751.772733    | 876.390005       | 1750.788717        | 875.897997       | 11 |
| 12 | 1651.676057       | 826.341667      | 1634.649508    | 817.828392       | 1633.665492       | 817.336384       | C    | <b>1329.573956</b> | 665.290616         | 1312.547407    | 656.777342       | 1311.563391        | 656.285334       | 10 |
| 13 | 1780.718650       | 890.862963      | 1763.692101    | 882.349689       | 1762.708085       | 881.857681       | E    | <b>1169.543307</b> | 585.275292         | 1152.516758    | 576.762017       | <b>1151.532742</b> | 576.270009       | 9  |
| 14 | 1895.745593       | 948.376435      | 1878.719044    | 939.863160       | 1877.735028       | 939.371152       | D    | <b>1040.500714</b> | <b>520.753995</b>  | 1023.474165    | 512.240721       | 1022.490149        | 511.748713       | 8  |
| 15 | 2024.788186       | 1012.897731     | 2007.761637    | 1004.384457      | 2006.777621       | 1003.892449      | E    | <b>925.473771</b>  | <b>463.240524</b>  | 908.447222     | 454.727249       | 907.463206         | 454.235241       | 7  |
| 16 | 2153.830779       | 1077.419027     | 2136.804230    | 1068.905753      | 2135.820214       | 1068.413745      | E    | <b>796.431178</b>  | 398.719227         | 779.404629     | 390.205953       | 778.420613         | 389.713945       | 6  |
| 17 | 2266.914843       | 1133.961059     | 2249.888294    | 1125.447785      | 2248.904278       | 1124.955777      | L    | <b>667.388585</b>  | 334.197931         | 650.362036     | 325.684656       | 649.378020         | 325.192648       | 5  |
| 18 | 2395.957436       | 1198.482356     | 2378.930887    | 1189.969081      | 2377.946871       | 1189.477074      | E    | <b>554.304521</b>  | 277.655899         | 537.277972     | 269.142624       | 536.293956         | 268.650616       | 4  |
| 19 | 2533.016348       | 1267.011812     | 2515.989799    | 1258.498537      | 2515.005783       | 1258.006529      | H    | <b>425.261928</b>  | 213.134602         | 408.235379     | 204.621328       |                    |                  | 3  |
| 20 | 2646.100412       | 1323.553844     | 2629.073863    | 1315.040569      | 2628.089847       | 1314.548562      | L    | <b>288.203016</b>  | 144.605146         | 271.176467     | 136.091872       |                    |                  | 2  |
| 21 |                   |                 |                |                  |                   |                  | R    | <b>175.118952</b>  | 88.063114          | 158.092403     | 79.549839        |                    |                  | 1  |

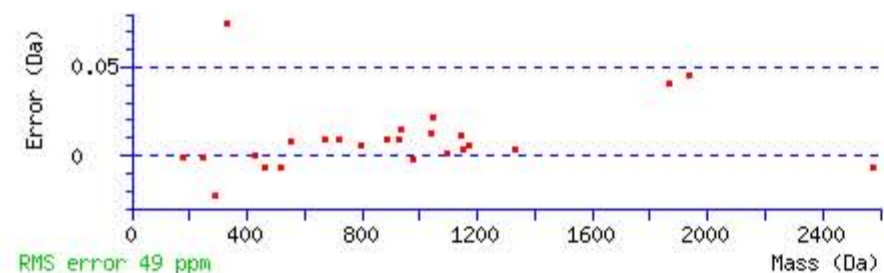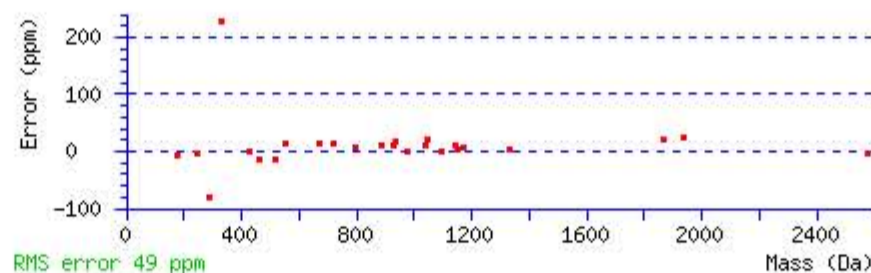

NCBI BLAST search of **SCVGETTESTQCEDEELEHLR**

(Parameters: blastp, nr protein database, expect=20000, no filter, PAM30)

Other BLAST [web gateways](#)

## All matches to this query

| Score | Mr(calc):   | Delta    | Sequence                              |
|-------|-------------|----------|---------------------------------------|
| 72.2  | 2819.204803 | 0.009573 | <a href="#">SCVGETTESTQCEDEELEHLR</a> |

# MASCOT Search Results

## Peptide View

MS/MS Fragmentation of **IACVLPVLM DGIQSH P QKPFYT VGEK**

Found in **CO7\_HUMAN**, Complement component C7 OS=Homo sapiens GN=C7 PE=1 SV=2

Match to Query 56896: 3237.709936 from(810.434760,4+) rtinseconds(2522) index(7675)

Title: Locus:1.1.1.3398.18 File:"2013-07-02 CLN FXIII 180 min 3rd F 1.wiff"

Data file C:\Program Files (x86)\Matrix Science\Mascot Daemon\mgf9 FXIII 180 min 3rd\mascot\_daemon\_merge.mgf

Click mouse within plot area to zoom in by factor of two about that point

Or, Plot from  to  Da

Label all possible matches  Label matches used for scoring

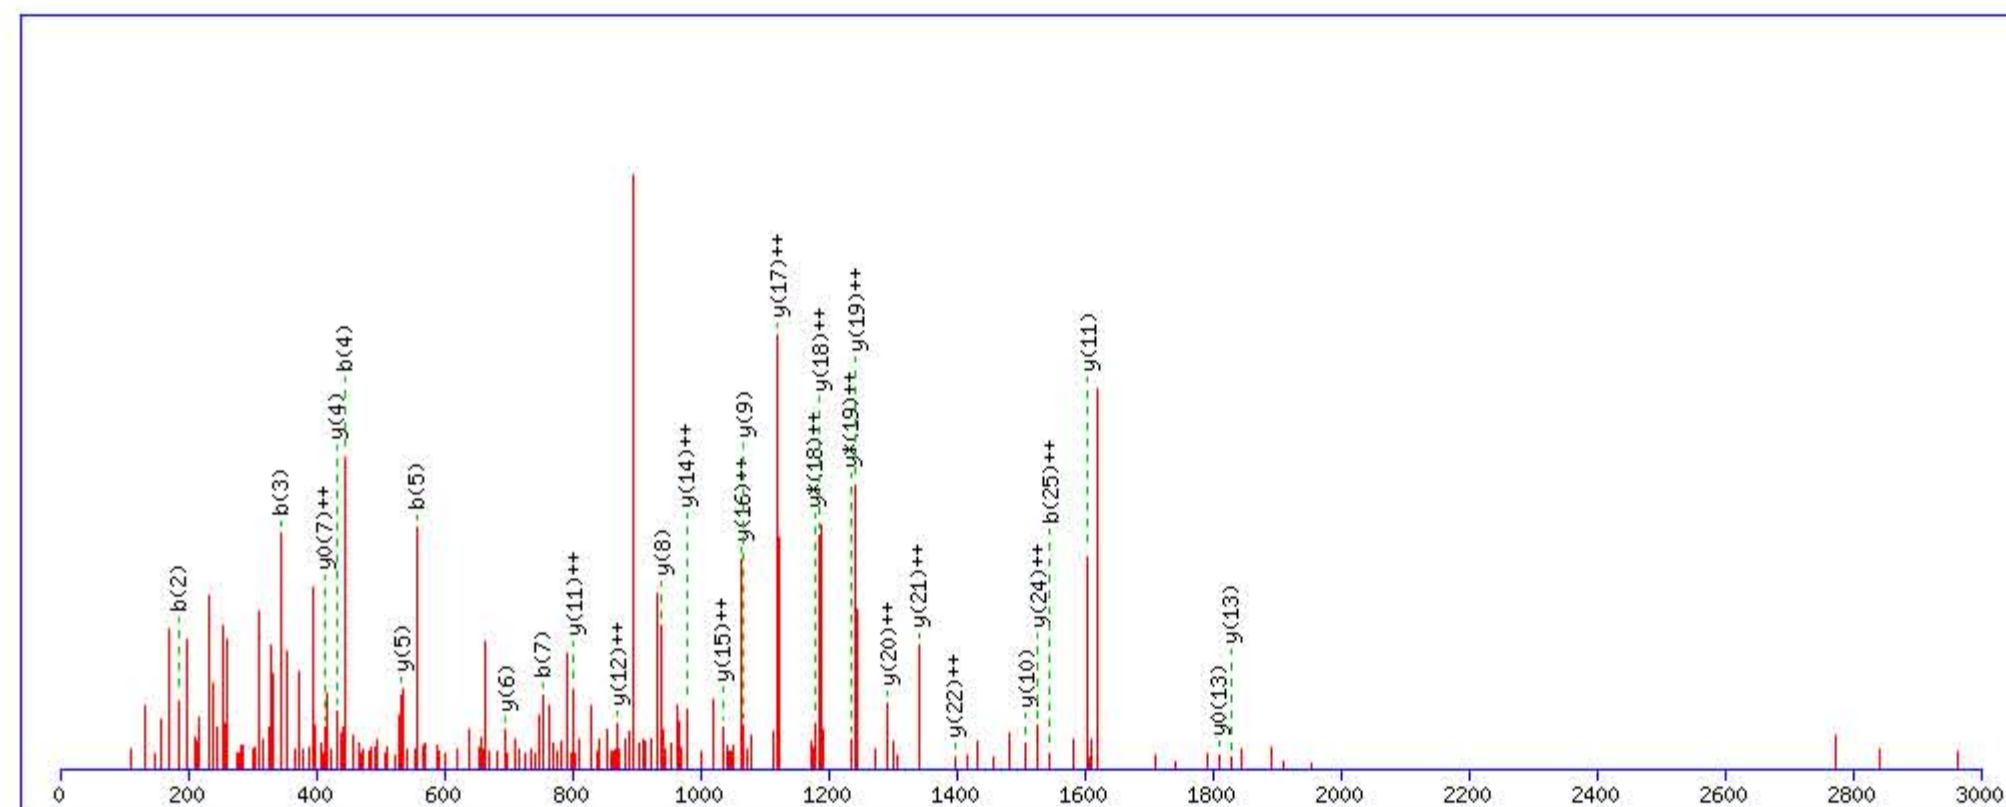

Monoisotopic mass of neutral peptide  $M_r(\text{calc})$ : 3237.675262

Fixed modifications: Carbamidomethyl (C) (apply to specified residues or termini only)

Variable modifications:

Q17 : Biotin:Thermo-21345 (Q)

Ions Score: 44 Expect: 0.00081

Matches : 30/256 fragment ions using 88 most intense peaks [\(help\)](#)

| #  | b                 | b <sup>++</sup>    | b <sup>*</sup> | b <sup>++</sup> | b <sup>0</sup> | b <sup>0++</sup> | Seq. | y                  | y <sup>++</sup>    | y <sup>*</sup> | y <sup>++</sup>    | y <sup>0</sup>     | y <sup>0++</sup>  | #  |
|----|-------------------|--------------------|----------------|-----------------|----------------|------------------|------|--------------------|--------------------|----------------|--------------------|--------------------|-------------------|----|
| 1  | 114.091340        | 57.549308          |                |                 |                |                  | I    |                    |                    |                |                    |                    |                   | 26 |
| 2  | <b>185.128454</b> | 93.067865          |                |                 |                |                  | A    | 3125.598471        | 1563.302873        | 3108.571922    | 1554.789599        | 3107.587906        | 1554.297591       | 25 |
| 3  | <b>345.159103</b> | 173.083190         |                |                 |                |                  | C    | 3054.561357        | <b>1527.784316</b> | 3037.534808    | 1519.271042        | 3036.550792        | 1518.779034       | 24 |
| 4  | <b>444.227517</b> | 222.617397         |                |                 |                |                  | V    | 2894.530708        | 1447.768992        | 2877.504159    | 1439.255717        | 2876.520143        | 1438.763709       | 23 |
| 5  | <b>557.311581</b> | 279.159429         |                |                 |                |                  | L    | 2795.462294        | <b>1398.234785</b> | 2778.435745    | 1389.721510        | 2777.451729        | 1389.229502       | 22 |
| 6  | 654.364345        | 327.685811         |                |                 |                |                  | P    | 2682.378230        | <b>1341.692753</b> | 2665.351681    | 1333.179478        | 2664.367665        | 1332.687470       | 21 |
| 7  | <b>753.432759</b> | 377.220018         |                |                 |                |                  | V    | 2585.325466        | <b>1293.166371</b> | 2568.298917    | 1284.653096        | 2567.314901        | 1284.161088       | 20 |
| 8  | 866.516823        | 433.762050         |                |                 |                |                  | L    | 2486.257052        | <b>1243.632164</b> | 2469.230503    | <b>1235.118889</b> | 2468.246487        | 1234.626881       | 19 |
| 9  | 997.557308        | 499.282292         |                |                 |                |                  | M    | 2373.172988        | <b>1187.090132</b> | 2356.146439    | <b>1178.576857</b> | 2355.162423        | 1178.084849       | 18 |
| 10 | 1112.584251       | 556.795764         |                |                 | 1094.573686    | 547.790481       | D    | 2242.132503        | <b>1121.569889</b> | 2225.105954    | 1113.056615        | 2224.121938        | 1112.564607       | 17 |
| 11 | 1169.605715       | 585.306495         |                |                 | 1151.595150    | 576.301213       | G    | 2127.105560        | <b>1064.056418</b> | 2110.079011    | 1055.543143        | 2109.094995        | 1055.051135       | 16 |
| 12 | 1282.689779       | 641.848527         |                |                 | 1264.679214    | 632.843245       | I    | 2070.084096        | <b>1035.545686</b> | 2053.057547    | 1027.032411        | 2052.073531        | 1026.540403       | 15 |
| 13 | 1410.748357       | 705.877816         | 1393.721808    | 697.364542      | 1392.737792    | 696.872534       | Q    | 1957.000032        | <b>979.003654</b>  | 1939.973483    | 970.490380         | 1938.989467        | 969.998371        | 14 |
| 14 | 1497.780385       | 749.393830         | 1480.753836    | 740.880556      | 1479.769820    | 740.388548       | S    | <b>1828.941454</b> | 914.974365         | 1811.914905    | 906.461091         | <b>1810.930889</b> | 905.969083        | 13 |
| 15 | 1634.839297       | 817.923286         | 1617.812748    | 809.410012      | 1616.828732    | 808.918004       | H    | 1741.909426        | <b>871.458351</b>  | 1724.882877    | 862.945077         | 1723.898861        | 862.453068        | 12 |
| 16 | 1731.892061       | 866.449668         | 1714.865512    | 857.936394      | 1713.881496    | 857.444386       | P    | <b>1604.850514</b> | <b>802.928895</b>  | 1587.823965    | 794.415621         | 1586.839949        | 793.923612        | 11 |
| 17 | 2171.117387       | 1086.062331        | 2154.090838    | 1077.549057     | 2153.106822    | 1077.057049      | Q    | <b>1507.797750</b> | 754.402513         | 1490.771201    | 745.889239         | 1489.787185        | 745.397230        | 10 |
| 18 | 2299.212350       | 1150.109813        | 2282.185801    | 1141.596538     | 2281.201785    | 1141.104530      | K    | <b>1068.572424</b> | 534.789850         | 1051.545875    | 526.276575         | 1050.561859        | 525.784567        | 9  |
| 19 | 2396.265114       | 1198.636195        | 2379.238565    | 1190.122920     | 2378.254549    | 1189.630912      | P    | <b>940.477461</b>  | 470.742368         | 923.450912     | 462.229094         | 922.466896         | 461.737086        | 8  |
| 20 | 2543.333528       | 1272.170402        | 2526.306979    | 1263.657127     | 2525.322963    | 1263.165119      | F    | 843.424697         | 422.215986         | 826.398148     | 413.702712         | 825.414132         | <b>413.210704</b> | 7  |
| 21 | 2706.396857       | 1353.702066        | 2689.370308    | 1345.188792     | 2688.386292    | 1344.696784      | Y    | <b>696.356283</b>  | 348.681779         | 679.329734     | 340.168505         | 678.345718         | 339.676497        | 6  |
| 22 | 2807.444536       | 1404.225906        | 2790.417987    | 1395.712631     | 2789.433971    | 1395.220623      | T    | <b>533.292954</b>  | 267.150115         | 516.266405     | 258.636840         | 515.282389         | 258.144832        | 5  |
| 23 | 2906.512950       | 1453.760113        | 2889.486401    | 1445.246838     | 2888.502385    | 1444.754830      | V    | <b>432.245275</b>  | 216.626275         | 415.218726     | 208.113001         | 414.234710         | 207.620993        | 4  |
| 24 | 2963.534414       | 1482.270845        | 2946.507865    | 1473.757570     | 2945.523849    | 1473.265562      | G    | 333.176861         | 167.092069         | 316.150312     | 158.578794         | 315.166296         | 158.086786        | 3  |
| 25 | 3092.577007       | <b>1546.792141</b> | 3075.550458    | 1538.278867     | 3074.566442    | 1537.786859      | E    | 276.155397         | 138.581337         | 259.128848     | 130.068062         | 258.144832         | 129.576054        | 2  |
| 26 |                   |                    |                |                 |                |                  | K    | 147.112804         | 74.060040          | 130.086255     | 65.546765          |                    |                   | 1  |

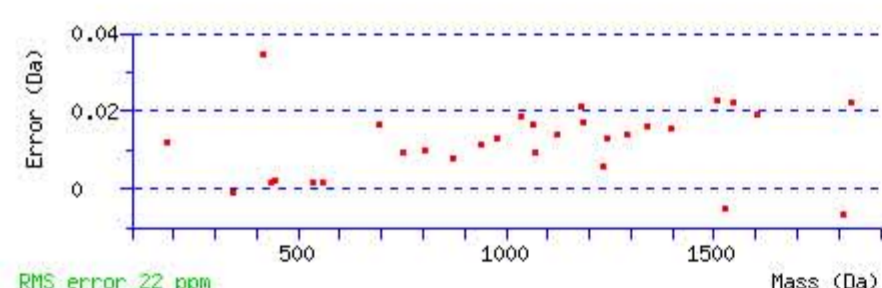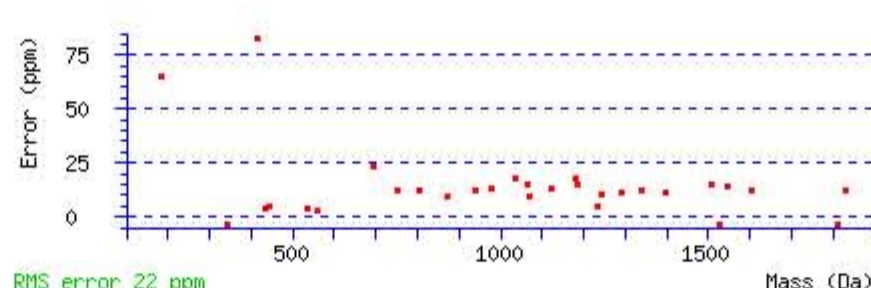

NCBI BLAST search of **IACVLPVLM DGIQSH P QKPFYT VGEK**

(Parameters: blastp, nr protein database, expect=20000, no filter, PAM30)

Other BLAST [web gateways](#)

All matches to this query

| Score | $M_r(\text{calc})$ : | Delta    | Sequence                                       |
|-------|----------------------|----------|------------------------------------------------|
| 44.0  | 3237.675262          | 0.034674 | <a href="#">IACVLPVLM DGIQSH P QKPFYT VGEK</a> |
| 26.2  | 3237.675262          | 0.034674 | <a href="#">IACVLPVLM DGIQSH P QKPFYT VGEK</a> |

Mascot: <http://www.matrixscience.com/>

# MASCOT Search Results

## Peptide View

MS/MS Fragmentation of **SVAVYGQYGGQPCVGNAFETQSCEPTR**

Found in **CO7\_HUMAN**, Complement component C7 OS=Homo sapiens GN=C7 PE=1 SV=2

Match to Query 57885: 3272.503122 from(1091.841650,3+) rtinseconds(2219) index(6098)

Title: Locus:1.1.1.3292.25 File:"2013-07-02 CLN FXIII 180 min 3rd F 1.wiff"

Data file C:\Program Files (x86)\Matrix Science\Mascot Daemon\mgf9 FXIII 180 min 3rd\mascot\_daemon\_merge.mgf

Click mouse within plot area to zoom in by factor of two about that point

Or, Plot from  to  Da

Label all possible matches  Label matches used for scoring

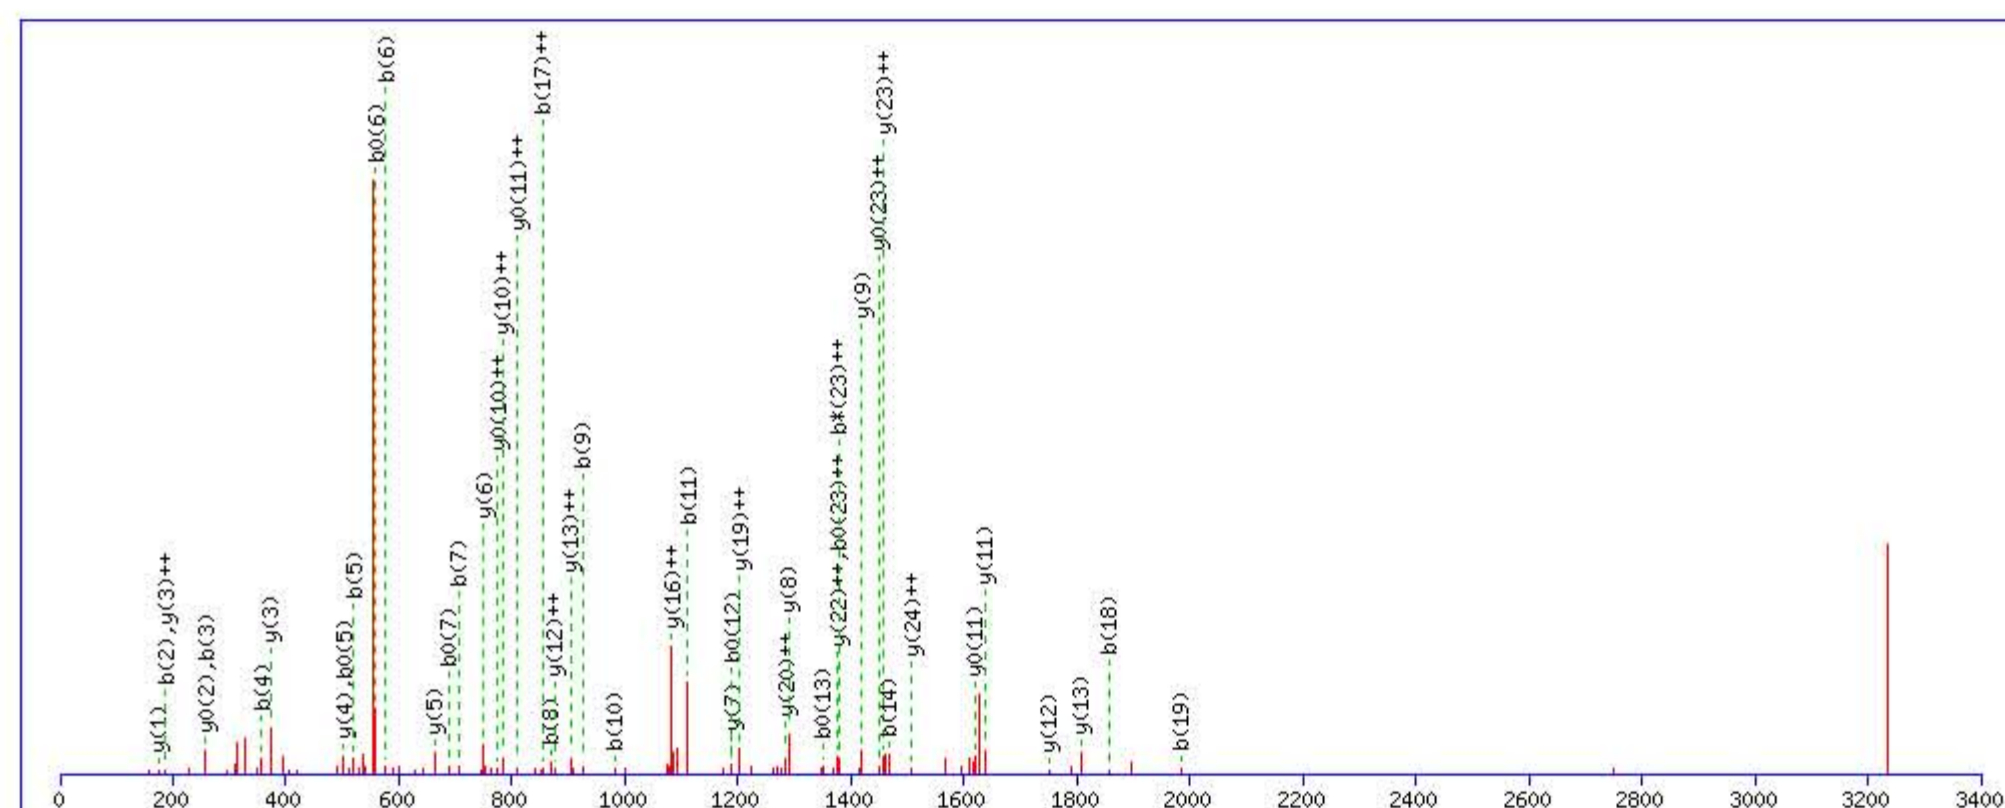

Monoisotopic mass of neutral peptide Mr(calc): 3272.468933

Fixed modifications: Carbamidomethyl (C) (apply to specified residues or termini only)

Variable modifications:

Q21 : Biotin:Thermo-21345 (Q)

Ions Score: 68 Expect: 2e-006

Matches : 47/298 fragment ions using 95 most intense peaks ([help](#))

| #  | b                  | b <sup>++</sup>   | b <sup>*</sup> | b <sup>+++</sup>   | b <sup>0</sup>     | b <sup>0++</sup>   | Seq. | y                  | y <sup>++</sup>    | y <sup>*</sup> | y <sup>+++</sup> | y <sup>0</sup>     | y <sup>0++</sup>   | #  |
|----|--------------------|-------------------|----------------|--------------------|--------------------|--------------------|------|--------------------|--------------------|----------------|------------------|--------------------|--------------------|----|
| 1  | 88.039304          | 44.523290         |                |                    | 70.028739          | 35.518008          | S    |                    |                    |                |                  |                    |                    | 27 |
| 2  | <b>187.107718</b>  | 94.057497         |                |                    | 169.097153         | 85.052214          | V    | 3186.444157        | 1593.725716        | 3169.417608    | 1585.212442      | 3168.433592        | 1584.720434        | 26 |
| 3  | <b>258.144832</b>  | 129.576054        |                |                    | 240.134267         | 120.570772         | A    | 3087.375743        | 1544.191509        | 3070.349194    | 1535.678235      | 3069.365178        | 1535.186227        | 25 |
| 4  | <b>357.213246</b>  | 179.110261        |                |                    | 339.202681         | 170.104979         | V    | 3016.338629        | <b>1508.672952</b> | 2999.312080    | 1500.159678      | 2998.328064        | 1499.667670        | 24 |
| 5  | <b>520.276575</b>  | 260.641926        |                |                    | <b>502.266010</b>  | 251.636643         | Y    | 2917.270215        | <b>1459.138745</b> | 2900.243666    | 1450.625471      | 2899.259650        | <b>1450.133463</b> | 23 |
| 6  | <b>577.298039</b>  | 289.152658        |                |                    | <b>559.287474</b>  | 280.147375         | G    | 2754.206886        | <b>1377.607081</b> | 2737.180337    | 1369.093806      | 2736.196321        | 1368.601798        | 22 |
| 7  | <b>705.356617</b>  | 353.181947        | 688.330068     | 344.668672         | <b>687.346052</b>  | 344.176664         | Q    | 2697.185422        | 1349.096349        | 2680.158873    | 1340.583074      | 2679.174857        | 1340.091066        | 21 |
| 8  | <b>868.419946</b>  | 434.713611        | 851.393397     | 426.200337         | 850.409381         | 425.708329         | Y    | 2569.126844        | <b>1285.067060</b> | 2552.100295    | 1276.553785      | 2551.116279        | 1276.061777        | 20 |
| 9  | <b>925.441410</b>  | 463.224343        | 908.414861     | 454.711069         | 907.430845         | 454.219061         | G    | 2406.063515        | <b>1203.535395</b> | 2389.036966    | 1195.022121      | 2388.052950        | 1194.530113        | 19 |
| 10 | <b>982.462874</b>  | 491.735075        | 965.436325     | 483.221801         | 964.452309         | 482.729793         | G    | 2349.042051        | 1175.024663        | 2332.015502    | 1166.511389      | 2331.031486        | 1166.019381        | 18 |
| 11 | <b>1110.521452</b> | 555.764364        | 1093.494903    | 547.251090         | 1092.510887        | 546.759082         | Q    | 2292.020587        | 1146.513931        | 2274.994038    | 1138.000657      | 2274.010022        | 1137.508649        | 17 |
| 12 | 1207.574216        | 604.290746        | 1190.547667    | 595.777472         | <b>1189.563651</b> | 595.285464         | P    | 2163.962009        | <b>1082.484642</b> | 2146.935460    | 1073.971368      | 2145.951444        | 1073.479360        | 16 |
| 13 | 1367.604865        | 684.306071        | 1350.578316    | 675.792796         | <b>1349.594300</b> | 675.300788         | C    | 2066.909245        | 1033.958260        | 2049.882696    | 1025.444986      | 2048.898680        | 1024.952978        | 15 |
| 14 | <b>1466.673279</b> | 733.840278        | 1449.646730    | 725.327003         | 1448.662714        | 724.834995         | V    | 1906.878596        | 953.942936         | 1889.852047    | 945.429662       | 1888.868031        | 944.937654         | 14 |
| 15 | 1523.694743        | 762.351010        | 1506.668194    | 753.837735         | 1505.684178        | 753.345727         | G    | <b>1807.810182</b> | <b>904.408729</b>  | 1790.783633    | 895.895455       | 1789.799617        | 895.403446         | 13 |
| 16 | 1637.737670        | 819.372473        | 1620.711121    | 810.859199         | 1619.727105        | 810.367191         | N    | <b>1750.788718</b> | <b>875.897997</b>  | 1733.762169    | 867.384723       | 1732.778153        | 866.892715         | 12 |
| 17 | 1708.774784        | <b>854.891030</b> | 1691.748235    | 846.377756         | 1690.764219        | 845.885748         | A    | <b>1636.745791</b> | 818.876534         | 1619.719242    | 810.363259       | <b>1618.735226</b> | <b>809.871251</b>  | 11 |
| 18 | <b>1855.843198</b> | 928.425237        | 1838.816649    | 919.911963         | 1837.832633        | 919.419955         | F    | 1565.708677        | <b>783.357977</b>  | 1548.682128    | 774.844702       | 1547.698112        | <b>774.352694</b>  | 10 |
| 19 | <b>1984.885791</b> | 992.946534        | 1967.859242    | 984.433259         | 1966.875226        | 983.941251         | E    | <b>1418.640263</b> | 709.823770         | 1401.613714    | 701.310495       | 1400.629698        | 700.818487         | 9  |
| 20 | 2085.933470        | 1043.470373       | 2068.906921    | 1034.957098        | 2067.922905        | 1034.465090        | T    | <b>1289.597670</b> | 645.302473         | 1272.571121    | 636.789199       | 1271.587105        | 636.297190         | 8  |
| 21 | 2525.158796        | 1263.083036       | 2508.132247    | 1254.569761        | 2507.148231        | 1254.077754        | Q    | <b>1188.549991</b> | 594.778634         | 1171.523442    | 586.265359       | 1170.539426        | 585.773351         | 7  |
| 22 | 2612.190824        | 1306.599050       | 2595.164275    | 1298.085776        | 2594.180259        | 1297.593768        | S    | <b>749.324665</b>  | 375.165970         | 732.298116     | 366.652696       | 731.314100         | 366.160688         | 6  |
| 23 | 2772.221473        | 1386.614374       | 2755.194924    | <b>1378.101100</b> | 2754.210908        | <b>1377.609092</b> | C    | <b>662.292637</b>  | 331.649956         | 645.266088     | 323.136682       | 644.282072         | 322.644674         | 5  |
| 24 | 2901.264066        | 1451.135671       | 2884.237517    | 1442.622396        | 2883.253501        | 1442.130389        | E    | <b>502.261988</b>  | 251.634632         | 485.235439     | 243.121357       | 484.251423         | 242.629349         | 4  |
| 25 | 2998.316830        | 1499.662053       | 2981.290281    | 1491.148778        | 2980.306265        | 1490.656771        | P    | <b>373.219395</b>  | <b>187.113335</b>  | 356.192846     | 178.600061       | 355.208830         | 178.108053         | 3  |
| 26 | 3099.364509        | 1550.185892       | 3082.337960    | 1541.672618        | 3081.353944        | 1541.180610        | T    | 276.166631         | 138.586953         | 259.140082     | 130.073679       | <b>258.156066</b>  | 129.581671         | 2  |
| 27 |                    |                   |                |                    |                    |                    | R    | <b>175.118952</b>  | 88.063114          | 158.092403     | 79.549839        |                    |                    | 1  |

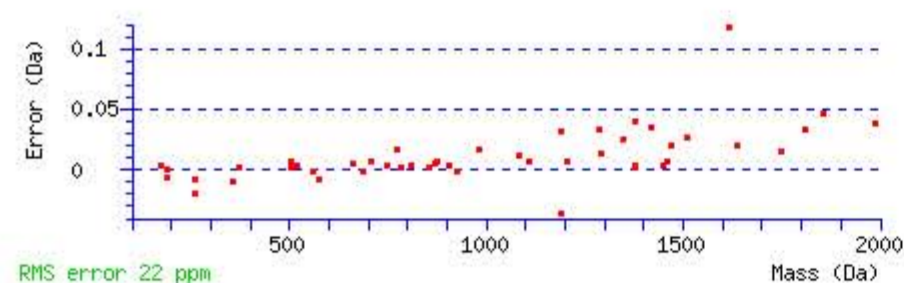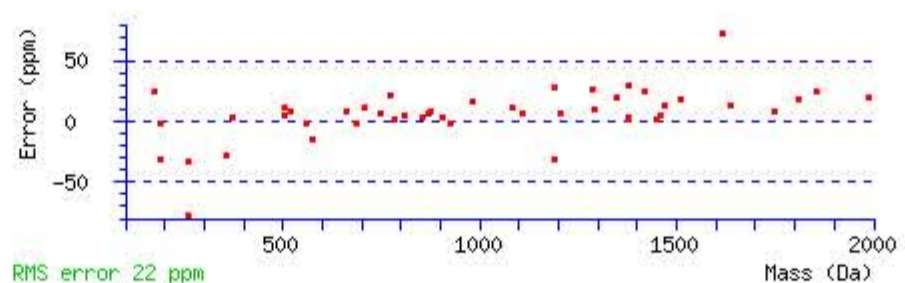

NCBI BLAST search of **SVAVYGQYGGQPCVGNAFETQSCEPTR**

(Parameters: blastp, nr protein database, expect=20000, no filter, PAM30)

Other BLAST [web gateways](#)

All matches to this query

| Score | Mr(calc):   | Delta    | Sequence                                    |
|-------|-------------|----------|---------------------------------------------|
| 67.9  | 3272.468933 | 0.034189 | <a href="#">SVAVYGQYGGQPCVGNAFETQSCEPTR</a> |
| 11.2  | 3272.468933 | 0.034189 | <a href="#">SVAVYGQYGGQPCVGNAFETQSCEPTR</a> |

Mascot: <http://www.matrixscience.com/>

# MASCOT Search Results

## Peptide View

MS/MS Fragmentation of **AGIQER**

Found in **CO8A\_HUMAN**, Complement component C8 alpha chain OS=Homo sapiens GN=C8A PE=1 SV=2

Match to Query 11197: 983.518528 from(492.766540,2+) rtinseconds(1430) index(28415)

Title: Locus:1.1.1.3161.6 File:"2013-07-02 CLN FXIII 180 min 3rd F 3.wiff"

Data file C:\Program Files (x86)\Matrix Science\Mascot Daemon\mgf\9 FXIII 180 min 3rd\mascot\_daemon\_merge.mgf

Click mouse within plot area to zoom in by factor of two about that point

Or, Plot from  to  Da

Label all possible matches  Label matches used for scoring

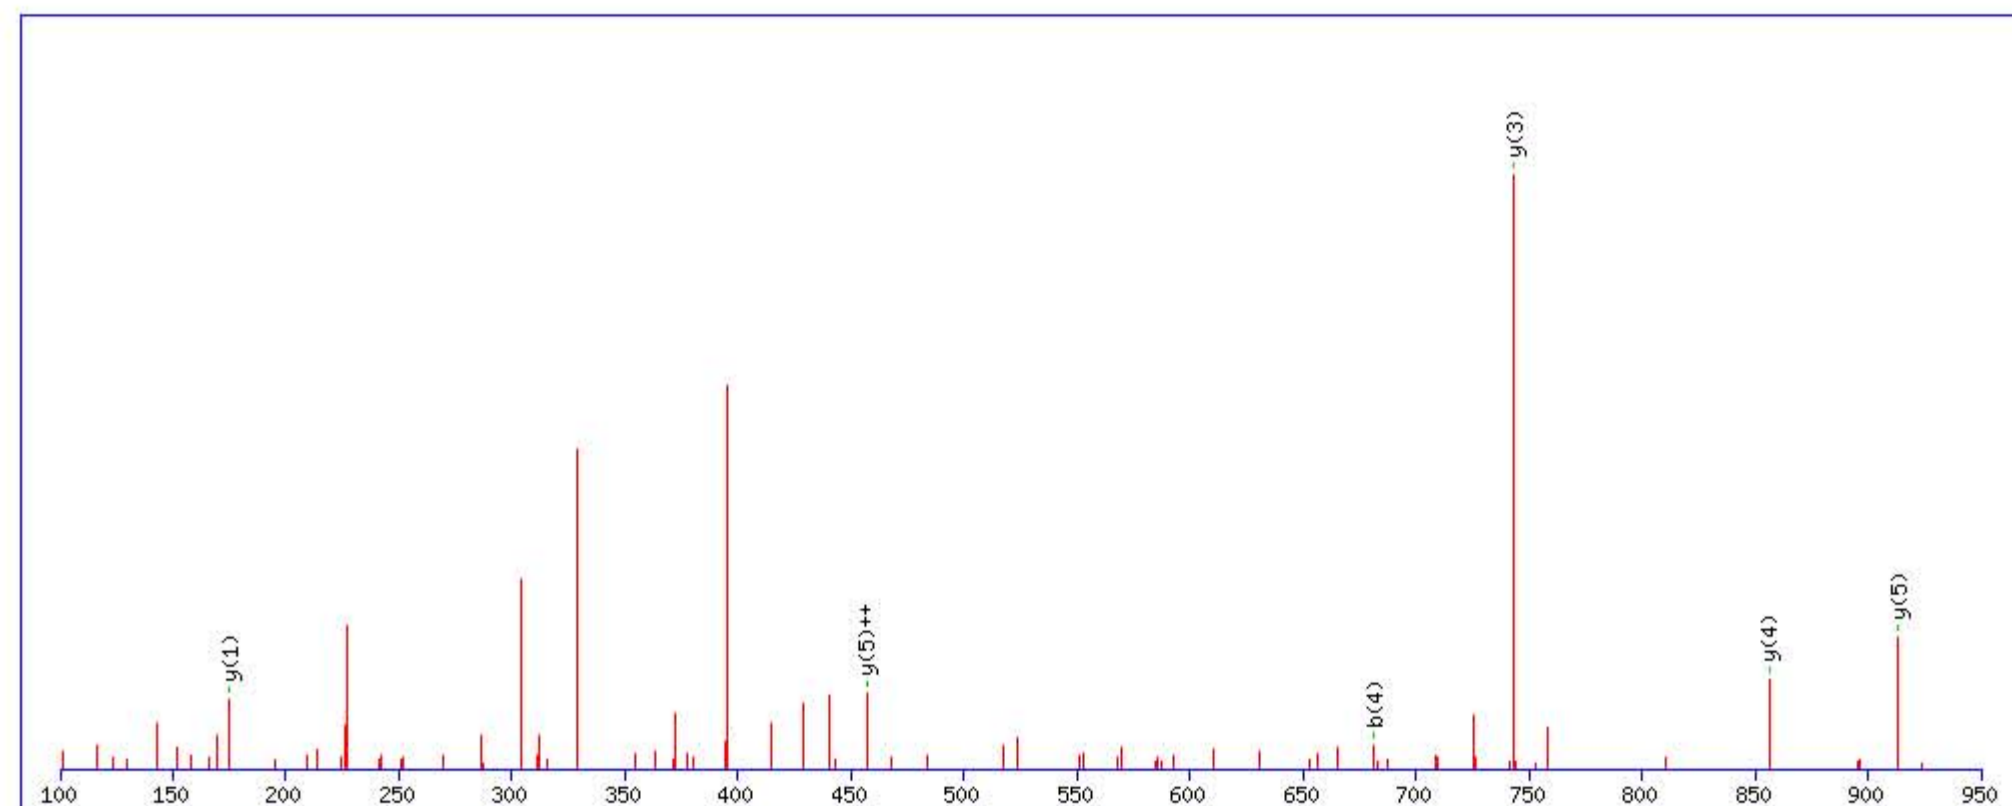

Monoisotopic mass of neutral peptide Mr(calc): 983.522217

Fixed modifications: Carbamidomethyl (C) (apply to specified residues or termini only)

Variable modifications:

Q4 : Biotin:Thermo-21345 (Q)

Ions Score: 26 Expect: 0.044

Matches : 6/44 fragment ions using 9 most intense peaks ([help](#))

| # | b                 | b <sup>++</sup> | b <sup>*</sup> | b <sup>+++</sup> | b <sup>0</sup> | b <sup>0++</sup> | Seq. | y                 | y <sup>++</sup>   | y <sup>*</sup> | y <sup>+++</sup> | y <sup>0</sup> | y <sup>0++</sup> | # |
|---|-------------------|-----------------|----------------|------------------|----------------|------------------|------|-------------------|-------------------|----------------|------------------|----------------|------------------|---|
| 1 | 72.044390         | 36.525833       |                |                  |                |                  | A    |                   |                   |                |                  |                |                  | 6 |
| 2 | 129.065854        | 65.036565       |                |                  |                |                  | G    | <b>913.492399</b> | <b>457.249838</b> | 896.465850     | 448.736563       | 895.481834     | 448.244555       | 5 |
| 3 | 242.149918        | 121.578597      |                |                  |                |                  | I    | <b>856.470935</b> | 428.739106        | 839.444386     | 420.225831       | 838.460370     | 419.733823       | 4 |
| 4 | <b>681.375244</b> | 341.191260      | 664.348695     | 332.677986       |                |                  | Q    | <b>743.386871</b> | 372.197074        | 726.360322     | 363.683799       | 725.376306     | 363.191791       | 3 |
| 5 | 810.417837        | 405.712557      | 793.391288     | 397.199282       | 792.407272     | 396.707274       | E    | 304.161545        | 152.584411        | 287.134996     | 144.071136       | 286.150980     | 143.579128       | 2 |
| 6 |                   |                 |                |                  |                |                  | R    | <b>175.118952</b> | 88.063114         | 158.092403     | 79.549840        |                |                  | 1 |

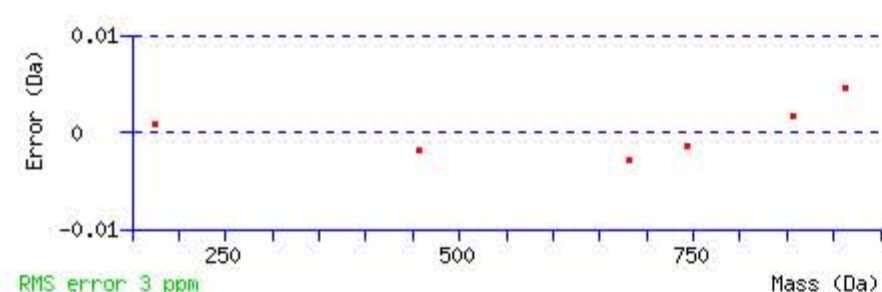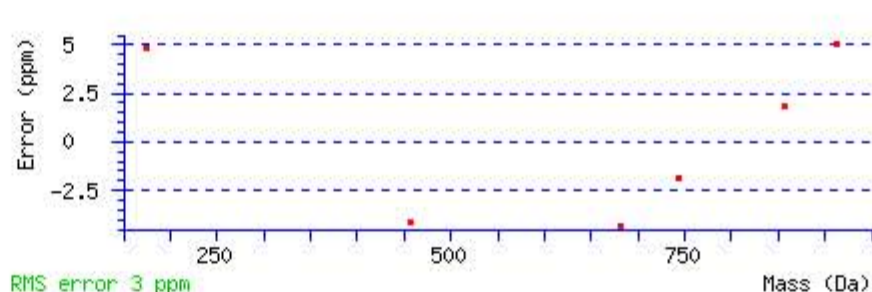

NCBI BLAST search of **AGIQER**

(Parameters: blastp, nr protein database, expect=20000, no filter, PAM30)

Other BLAST [web gateways](#)

All matches to this query

| Score | Mr(calc):  | Delta     | Sequence                 |
|-------|------------|-----------|--------------------------|
| 26.3  | 983.522217 | -0.003689 | <a href="#">AGIQER</a>   |
| 23.4  | 983.522217 | -0.003689 | <a href="#">AGLEQR</a>   |
| 11.4  | 983.522217 | -0.003689 | <a href="#">QIQER</a>    |
| 11.4  | 983.522217 | -0.003689 | <a href="#">QLQER</a>    |
| 9.2   | 983.514816 | 0.003712  | <a href="#">QPVREAER</a> |
| 9.1   | 983.522202 | -0.003674 | <a href="#">KLMENPPR</a> |
| 9.1   | 983.522217 | -0.003689 | <a href="#">QLEQR</a>    |
| 9.1   | 983.530090 | -0.011562 | <a href="#">QLLNHFGR</a> |
| 8.1   | 983.522217 | -0.003689 | <a href="#">AGQELR</a>   |
| 5.3   | 983.522217 | -0.003689 | <a href="#">AAQVER</a>   |

Mascot: <http://www.matrixscience.com/>

# MASCOT Search Results

## Peptide View

MS/MS Fragmentation of **LGSLGAACEQTQTEGAK**

Found in **CO8A\_HUMAN**, Complement component C8 alpha chain OS=Homo sapiens GN=C8A PE=1 SV=2

Match to Query 40408: 2030.961488 from(1016.488020,2+) rtinseconds(1734) index(17331)

Title: Locus:1.1.1.3169.23 File:"2013-07-02 CLN FXIII 180 min 3rd F 2.wiff"

Data file C:\Program Files (x86)\Matrix Science\Mascot Daemon\mgf9 FXIII 180 min 3rd\mascot\_daemon\_merge.mgf

Click mouse within plot area to zoom in by factor of two about that point

Or, Plot from  to  Da

Label all possible matches  Label matches used for scoring

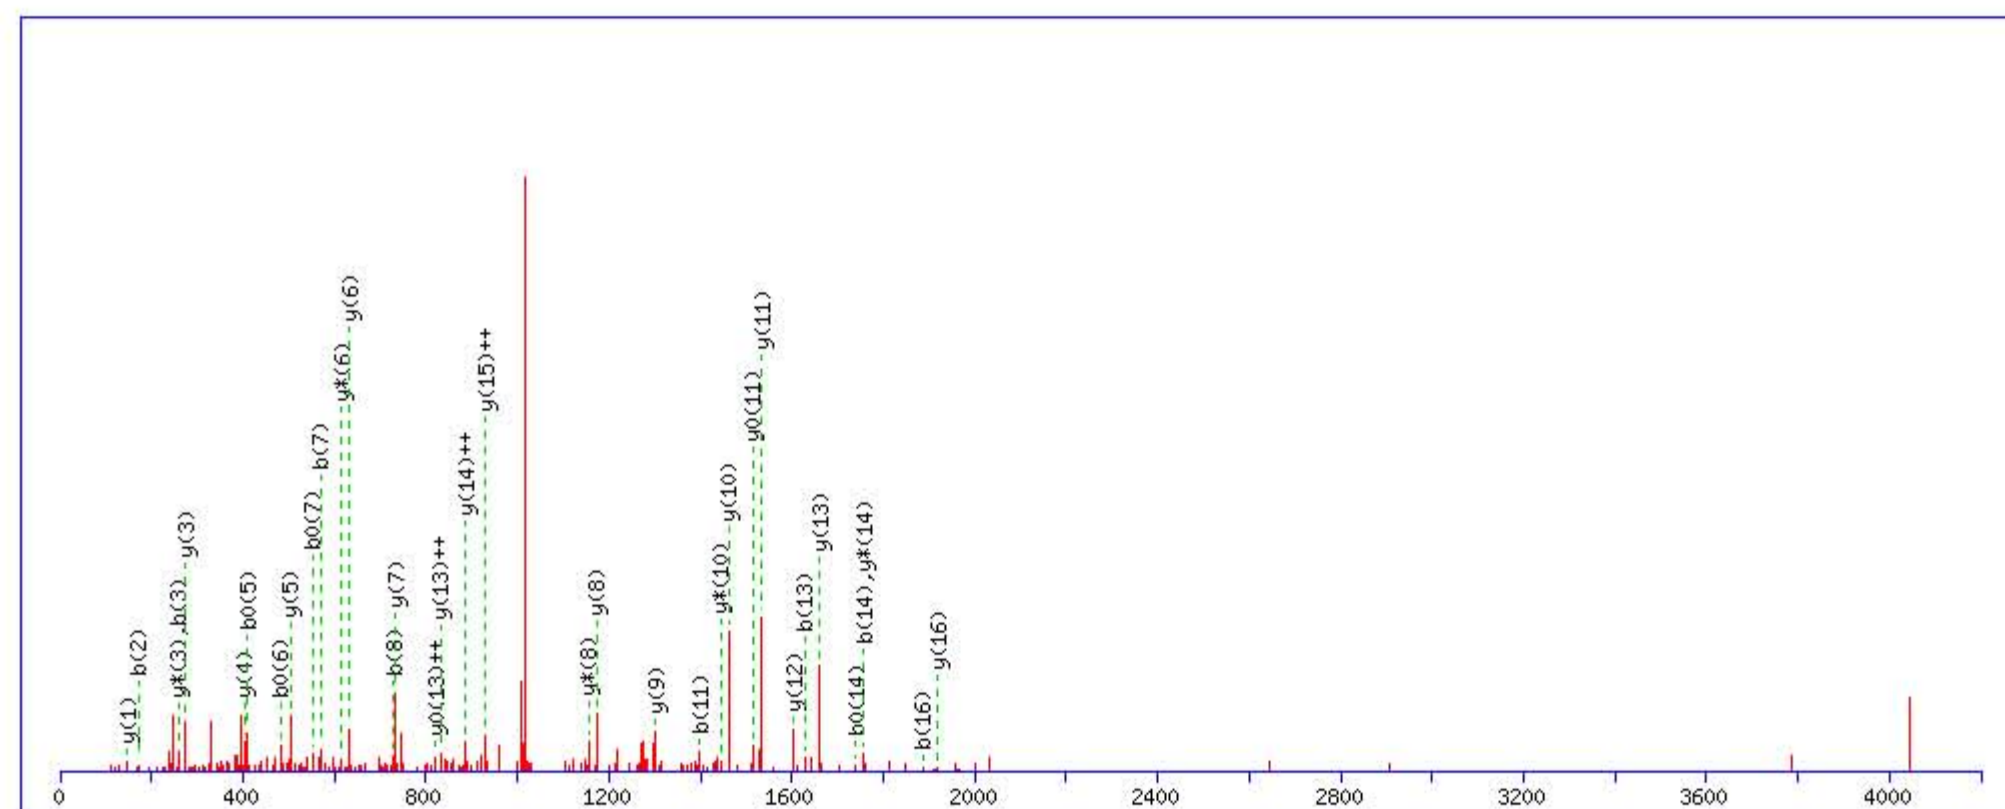

Monoisotopic mass of neutral peptide Mr(calc): 2030.976501

Fixed modifications: Carbamidomethyl (C) (apply to specified residues or termini only)

Variable modifications:

Q10 : Biotin:Thermo-21345 (Q)

Ions Score: 85 Expect: 6e-008

Matches : 35/164 fragment ions using 57 most intense peaks [\(help\)](#)

| #  | b                  | b <sup>++</sup> | b <sup>*</sup> | b <sup>*++</sup> | b <sup>0</sup>     | b <sup>0++</sup> | Seq. | y                  | y <sup>++</sup>   | y <sup>*</sup>     | y <sup>*++</sup> | y <sup>0</sup>     | y <sup>0++</sup>  | #  |
|----|--------------------|-----------------|----------------|------------------|--------------------|------------------|------|--------------------|-------------------|--------------------|------------------|--------------------|-------------------|----|
| 1  | 114.091340         | 57.549308       |                |                  |                    |                  | L    |                    |                   |                    |                  |                    |                   | 17 |
| 2  | <b>171.112804</b>  | 86.060040       |                |                  |                    |                  | G    | <b>1918.899727</b> | 959.953502        | 1901.873178        | 951.440227       | 1900.889162        | 950.948219        | 16 |
| 3  | <b>258.144832</b>  | 129.576054      |                |                  | 240.134267         | 120.570772       | S    | 1861.878263        | <b>931.442770</b> | 1844.851714        | 922.929495       | 1843.867698        | 922.437487        | 15 |
| 4  | 371.228896         | 186.118086      |                |                  | 353.218331         | 177.112804       | L    | 1774.846235        | <b>887.926756</b> | <b>1757.819686</b> | 879.413481       | 1756.835670        | 878.921473        | 14 |
| 5  | 428.250360         | 214.628818      |                |                  | <b>410.239795</b>  | 205.623536       | G    | <b>1661.762171</b> | <b>831.384724</b> | 1644.735622        | 822.871449       | 1643.751606        | <b>822.379441</b> | 13 |
| 6  | 499.287474         | 250.147375      |                |                  | <b>481.276909</b>  | 241.142093       | A    | <b>1604.740707</b> | 802.873992        | 1587.714158        | 794.360717       | 1586.730142        | 793.868709        | 12 |
| 7  | <b>570.324588</b>  | 285.665932      |                |                  | <b>552.314023</b>  | 276.660650       | A    | <b>1533.703593</b> | 767.355435        | 1516.677044        | 758.842160       | <b>1515.693028</b> | 758.350152        | 11 |
| 8  | <b>730.355237</b>  | 365.681257      |                |                  | 712.344672         | 356.675974       | C    | <b>1462.666479</b> | 731.836878        | <b>1445.639930</b> | 723.323603       | 1444.655914        | 722.831595        | 10 |
| 9  | 859.397830         | 430.202553      |                |                  | 841.387265         | 421.197271       | E    | <b>1302.635830</b> | 651.821553        | 1285.609281        | 643.308279       | 1284.625265        | 642.816270        | 9  |
| 10 | 1298.623156        | 649.815216      | 1281.596607    | 641.301942       | 1280.612591        | 640.809934       | Q    | <b>1173.593237</b> | 587.300257        | <b>1156.566688</b> | 578.786982       | 1155.582672        | 578.294974        | 8  |
| 11 | <b>1399.670835</b> | 700.339056      | 1382.644286    | 691.825781       | 1381.660270        | 691.333773       | T    | <b>734.367911</b>  | 367.687594        | 717.341362         | 359.174319       | 716.357346         | 358.682311        | 7  |
| 12 | 1527.729413        | 764.368345      | 1510.702864    | 755.855070       | 1509.718848        | 755.363062       | Q    | <b>633.320232</b>  | 317.163754        | <b>616.293683</b>  | 308.650480       | 615.309667         | 308.158472        | 6  |
| 13 | <b>1628.777092</b> | 814.892184      | 1611.750543    | 806.378910       | 1610.766527        | 805.886902       | T    | <b>505.261654</b>  | 253.134465        | 488.235105         | 244.621190       | 487.251089         | 244.129182        | 5  |
| 14 | <b>1757.819685</b> | 879.413481      | 1740.793136    | 870.900206       | <b>1739.809120</b> | 870.408198       | E    | <b>404.213975</b>  | 202.610625        | 387.187426         | 194.097351       | 386.203410         | 193.605343        | 4  |
| 15 | 1814.841149        | 907.924213      | 1797.814600    | 899.410938       | 1796.830584        | 898.918930       | G    | <b>275.171382</b>  | 138.089329        | <b>258.144833</b>  | 129.576054       |                    |                   | 3  |
| 16 | <b>1885.878263</b> | 943.442770      | 1868.851714    | 934.929495       | 1867.867698        | 934.437487       | A    | 218.149918         | 109.578597        | 201.123369         | 101.065322       |                    |                   | 2  |
| 17 |                    |                 |                |                  |                    |                  | K    | <b>147.112804</b>  | 74.060040         | 130.086255         | 65.546765        |                    |                   | 1  |

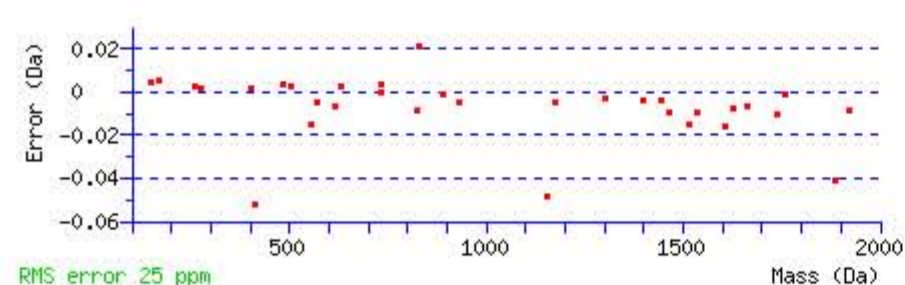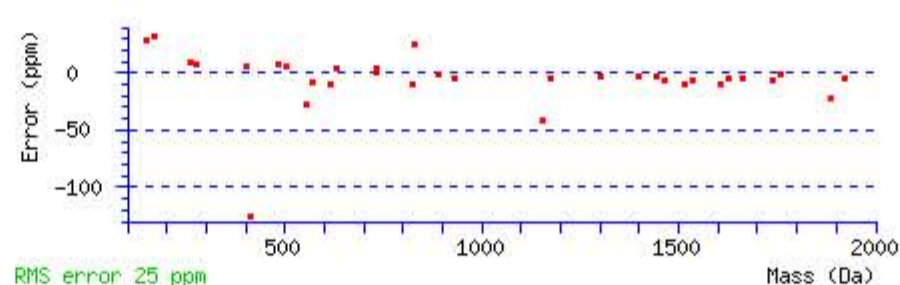

NCBI BLAST search of **LGSLGAACEQTQTEGAK**

(Parameters: blastp, nr protein database, expect=20000, no filter, PAM30)

Other BLAST [web gateways](#)

All matches to this query

| Score | Mr(calc):   | Delta     | Sequence                          |
|-------|-------------|-----------|-----------------------------------|
| 84.6  | 2030.976501 | -0.015013 | <a href="#">LGSLGAACEQTQTEGAK</a> |
| 57.5  | 2030.976501 | -0.015013 | <a href="#">LGSLGAACEQTQTEGAK</a> |

# MASCOT Search Results

## Peptide View

MS/MS Fragmentation of **AIDEDCSQYEPIPGSQK**

Found in **CO8A\_HUMAN**, Complement component C8 alpha chain OS=Homo sapiens GN=C8A PE=1 SV=2

Match to Query 44029: 2247.011712 from(750.011180,3+) rtinseconds(1924) index(31261)

Title: Locus:1.1.1.3333.22 File:"2013-07-02 CLN FXIII 180 min 3rd F 3.wiff"

Data file C:\Program Files (x86)\Matrix Science\Mascot Daemon\mgf\9 FXIII 180 min 3rd\mascot\_daemon\_merge.mgf

Click mouse within plot area to zoom in by factor of two about that point

Or, Plot from  to  Da

Label all possible matches  Label matches used for scoring

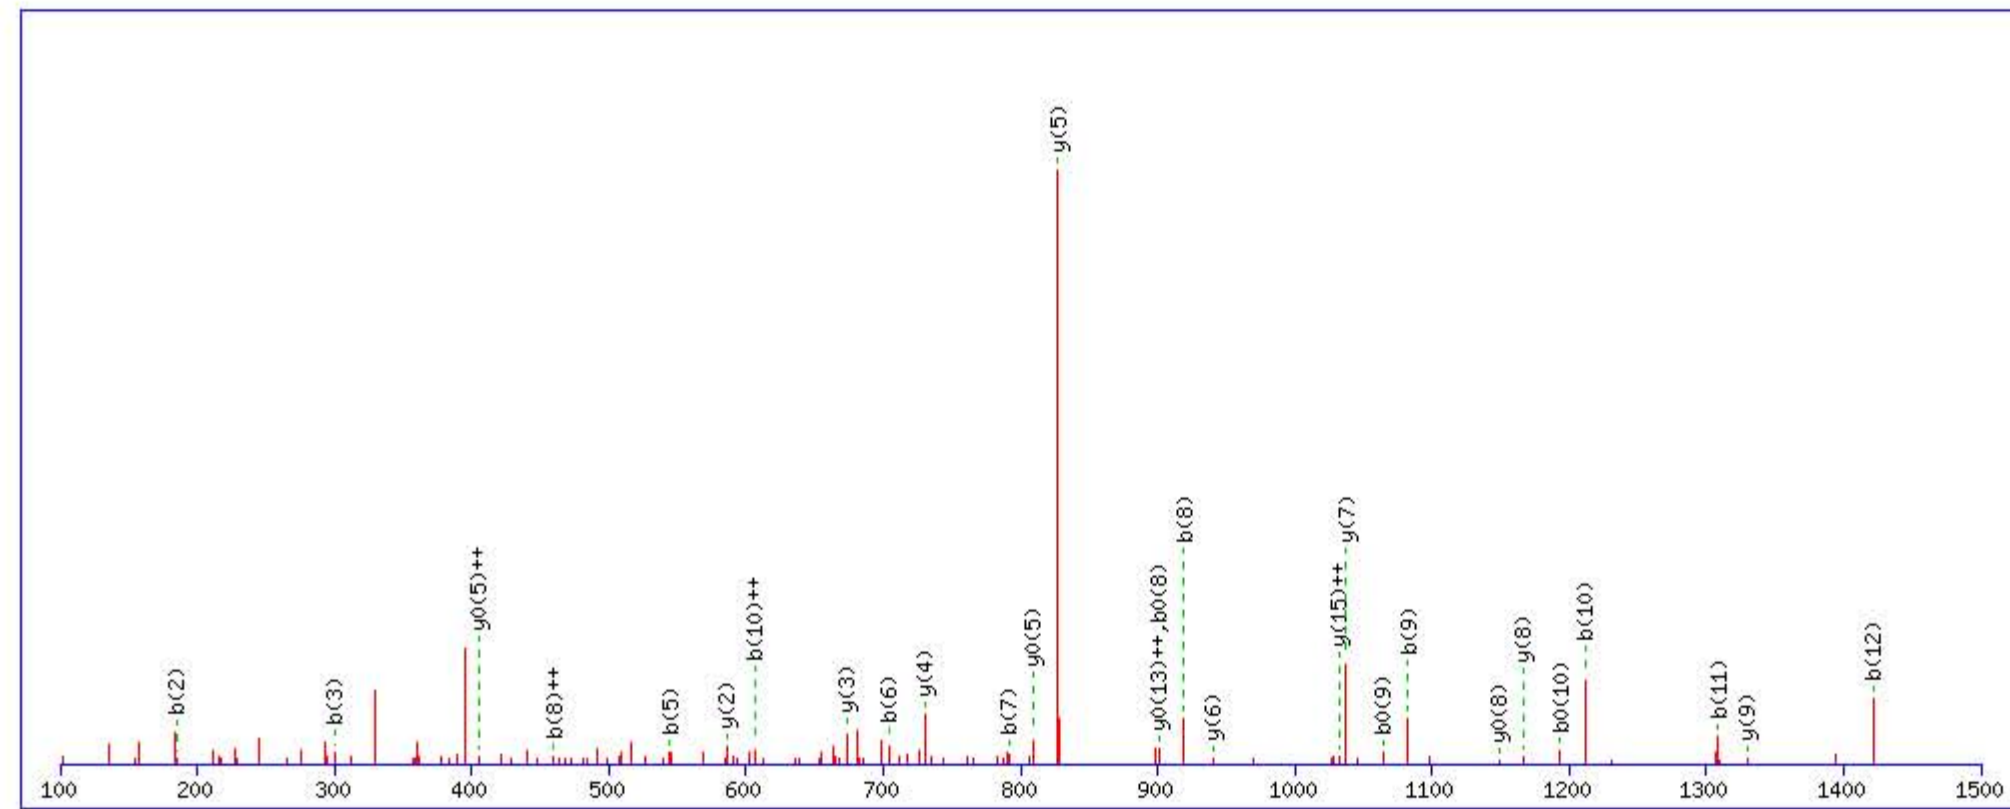

Monoisotopic mass of neutral peptide Mr(calc): 2247.018753

Fixed modifications: Carbamidomethyl (C) (apply to specified residues or termini only)

Variable modifications:

Q16 : Biotin:Thermo-21345 (Q)

Ions Score: 40 Expect: 0.00098

Matches : 28/170 fragment ions using 69 most intense peaks [\(help\)](#)

| #  | b                  | b <sup>++</sup>   | b <sup>*</sup> | b <sup>*++</sup> | b <sup>0</sup>     | b <sup>0++</sup> | Seq. | y                  | y <sup>++</sup>    | y <sup>*</sup> | y <sup>*++</sup> | y <sup>0</sup>     | y <sup>0++</sup>  | #  |
|----|--------------------|-------------------|----------------|------------------|--------------------|------------------|------|--------------------|--------------------|----------------|------------------|--------------------|-------------------|----|
| 1  | 72.044390          | 36.525833         |                |                  |                    |                  | A    |                    |                    |                |                  |                    |                   | 17 |
| 2  | <b>185.128454</b>  | 93.067865         |                |                  |                    |                  | I    | 2176.988934        | 1088.998105        | 2159.962385    | 1080.484830      | 2158.978369        | 1079.992822       | 16 |
| 3  | <b>300.155397</b>  | 150.581336        |                |                  | 282.144832         | 141.576054       | D    | 2063.904870        | <b>1032.456073</b> | 2046.878321    | 1023.942798      | 2045.894305        | 1023.450790       | 15 |
| 4  | 429.197990         | 215.102633        |                |                  | 411.187425         | 206.097351       | E    | 1948.877927        | 974.942602         | 1931.851378    | 966.429327       | 1930.867362        | 965.937319        | 14 |
| 5  | <b>544.224933</b>  | 272.616105        |                |                  | 526.214368         | 263.610822       | D    | 1819.835334        | 910.421305         | 1802.808785    | 901.908031       | 1801.824769        | <b>901.416022</b> | 13 |
| 6  | <b>704.255582</b>  | 352.631429        |                |                  | 686.245017         | 343.626147       | C    | 1704.808391        | 852.907833         | 1687.781842    | 844.394559       | 1686.797826        | 843.902551        | 12 |
| 7  | <b>791.287610</b>  | 396.147443        |                |                  | 773.277045         | 387.142161       | S    | 1544.777742        | 772.892509         | 1527.751193    | 764.379235       | 1526.767177        | 763.887227        | 11 |
| 8  | <b>919.346188</b>  | <b>460.176732</b> | 902.319639     | 451.663458       | <b>901.335623</b>  | 451.171450       | Q    | 1457.745714        | 729.376495         | 1440.719165    | 720.863221       | 1439.735149        | 720.371212        | 10 |
| 9  | <b>1082.409517</b> | 541.708397        | 1065.382968    | 533.195122       | <b>1064.398952</b> | 532.703114       | Y    | <b>1329.687136</b> | 665.347206         | 1312.660587    | 656.833931       | 1311.676571        | 656.341923        | 9  |
| 10 | <b>1211.452110</b> | <b>606.229693</b> | 1194.425561    | 597.716419       | <b>1193.441545</b> | 597.224410       | E    | <b>1166.623807</b> | 583.815541         | 1149.597258    | 575.302267       | <b>1148.613242</b> | 574.810259        | 8  |
| 11 | <b>1308.504874</b> | 654.756075        | 1291.478325    | 646.242801       | 1290.494309        | 645.750792       | P    | <b>1037.581214</b> | 519.294245         | 1020.554665    | 510.780971       | 1019.570649        | 510.288963        | 7  |
| 12 | <b>1421.588938</b> | 711.298107        | 1404.562389    | 702.784832       | 1403.578373        | 702.292824       | I    | <b>940.528450</b>  | 470.767863         | 923.501901     | 462.254589       | 922.517885         | 461.762581        | 6  |
| 13 | 1518.641702        | 759.824489        | 1501.615153    | 751.311215       | 1500.631137        | 750.819206       | P    | <b>827.444386</b>  | 414.225831         | 810.417837     | 405.712557       | <b>809.433821</b>  | <b>405.220549</b> | 5  |
| 14 | 1575.663166        | 788.335221        | 1558.636617    | 779.821946       | 1557.652601        | 779.329938       | G    | <b>730.391622</b>  | 365.699449         | 713.365073     | 357.186175       | 712.381057         | 356.694167        | 4  |
| 15 | 1662.695194        | 831.851235        | 1645.668645    | 823.337961       | 1644.684629        | 822.845952       | S    | <b>673.370158</b>  | 337.188717         | 656.343609     | 328.675443       | 655.359593         | 328.183435        | 3  |
| 16 | 2101.920520        | 1051.463898       | 2084.893971    | 1042.950623      | 2083.909955        | 1042.458615      | Q    | <b>586.338130</b>  | 293.672703         | 569.311581     | 285.159429       |                    |                   | 2  |
| 17 |                    |                   |                |                  |                    |                  | K    | 147.112804         | 74.060040          | 130.086255     | 65.546765        |                    |                   | 1  |

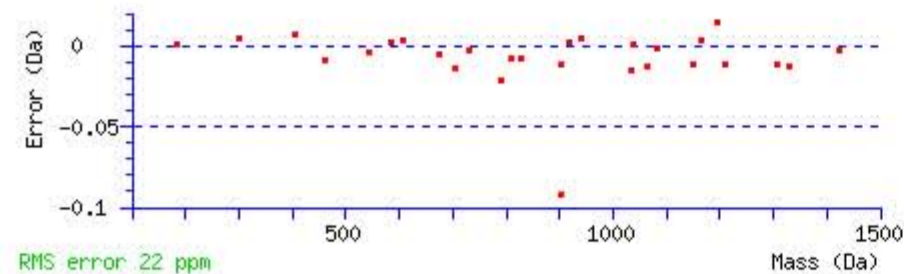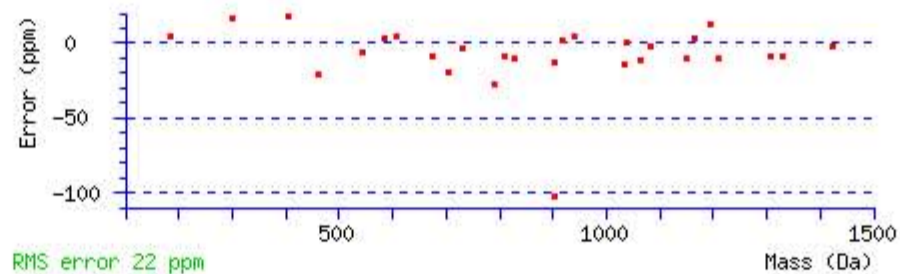

NCBI BLAST search of **AIDEDCSQYEPIPGSQK**

(Parameters: blastp, nr protein database, expect=20000, no filter, PAM30)

Other BLAST [web gateways](#)

All matches to this query

| Score | Mr(calc):   | Delta     | Sequence                          |
|-------|-------------|-----------|-----------------------------------|
| 40.3  | 2247.018753 | -0.007041 | <a href="#">AIDEDCSQYEPIPGSQK</a> |

Mascot: <http://www.matrixscience.com/>

# MASCOT Search Results

## Peptide View

MS/MS Fragmentation of **AIDEDCSQYEPGPSQK**  
 Found in **CO8A\_HUMAN**, Complement component C8 alpha chain OS=Homo sapiens GN=C8A PE=1 SV=2

Match to Query 49088: 2558.183262 from(853.735030,3+) rtinseconds(2171) index(32859)  
 Title: Locus:1.1.1.3419.25 File:"2013-07-02 CLN FXIII 180 min 3rd F 3.wiff"  
 Data file C:\Program Files (x86)\Matrix Science\Mascot Daemon\mgf9 FXIII 180 min 3rd\mascot\_daemon\_merge.mgf

Click mouse within plot area to zoom in by factor of two about that point  
 Or, Plot from  to  Da   
 Label all possible matches  Label matches used for scoring

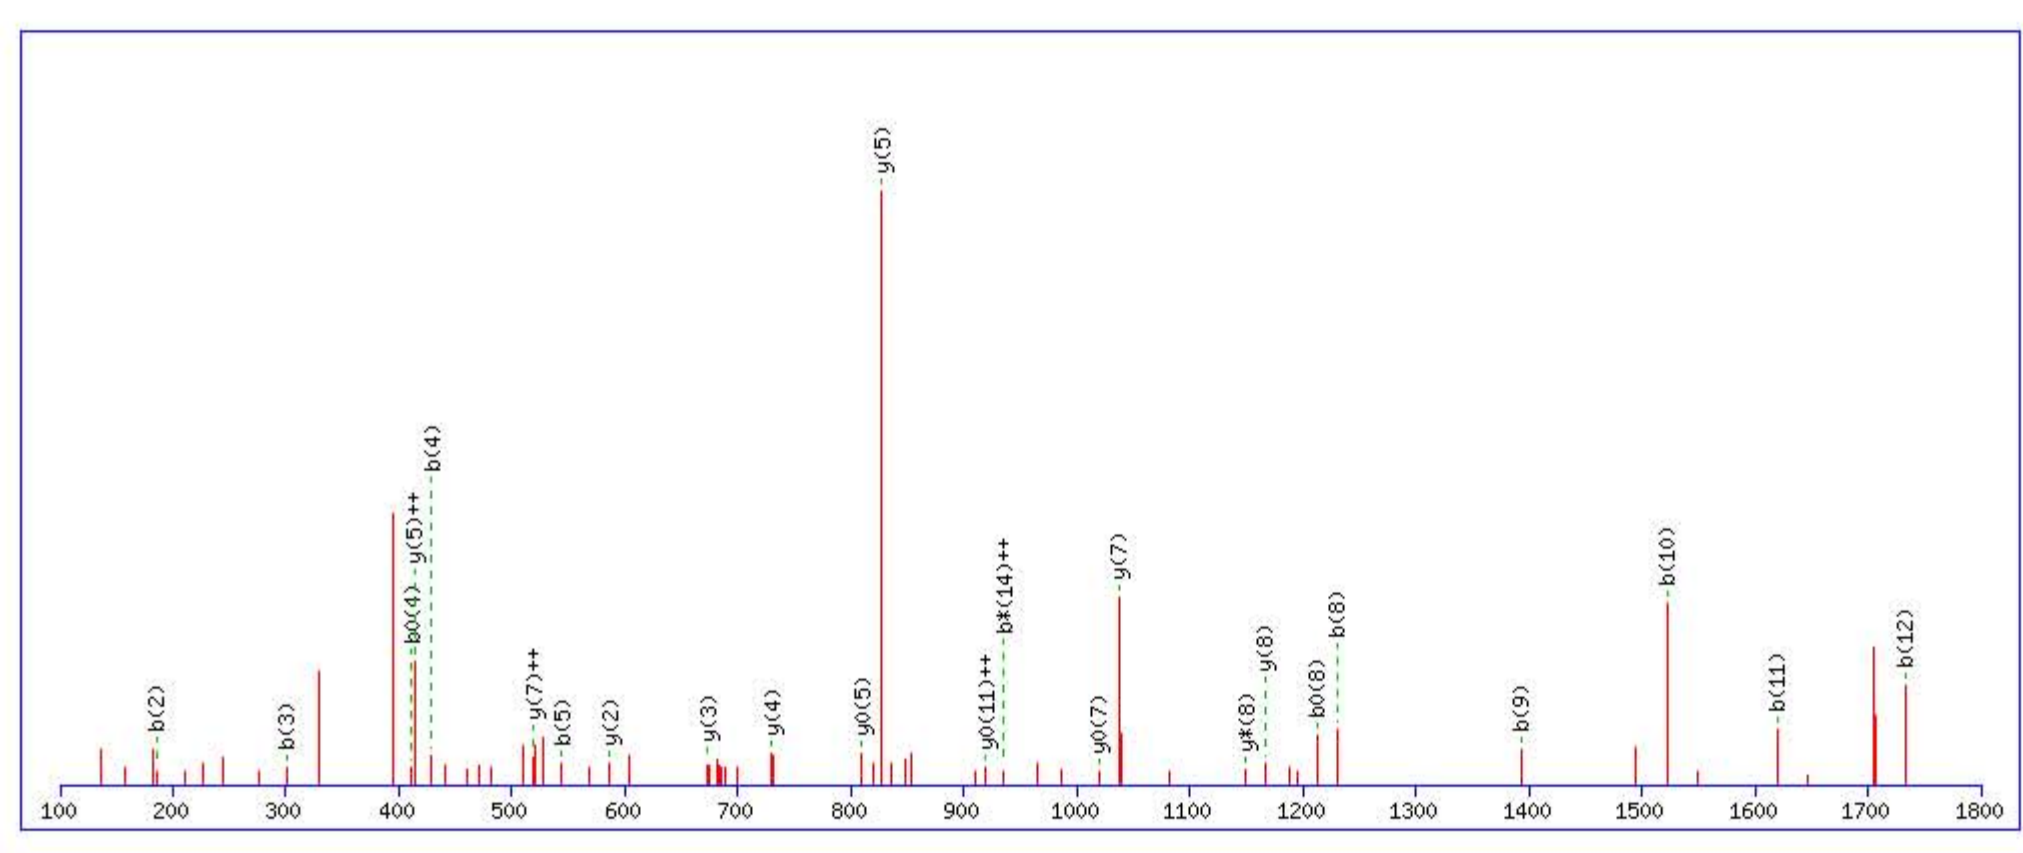

Monoisotopic mass of neutral peptide Mr(calc): 2558.185501  
 Fixed modifications: Carbamidomethyl (C) (apply to specified residues or termini only)  
 Variable modifications:  
 Q8 : Biotin:Thermo-21345 (Q)  
 Q16 : Biotin:Thermo-21345 (Q)  
 Ions Score: 31 Expect: 0.0015  
 Matches : 24/170 fragment ions using 62 most intense peaks [\(help\)](#)

| #  | b                  | b <sup>++</sup> | b <sup>*</sup> | b <sup>*++</sup>  | b <sup>0</sup>     | b <sup>0++</sup> | Seq. | y                  | y <sup>++</sup>   | y <sup>*</sup>     | y <sup>*++</sup> | y <sup>0</sup>     | y <sup>0++</sup>  | #  |
|----|--------------------|-----------------|----------------|-------------------|--------------------|------------------|------|--------------------|-------------------|--------------------|------------------|--------------------|-------------------|----|
| 1  | 72.044390          | 36.525833       |                |                   |                    |                  | A    |                    |                   |                    |                  |                    |                   | 17 |
| 2  | <b>185.128454</b>  | 93.067865       |                |                   |                    |                  | I    | 2488.155682        | 1244.581479       | 2471.129133        | 1236.068204      | 2470.145117        | 1235.576196       | 16 |
| 3  | <b>300.155397</b>  | 150.581336      |                |                   | 282.144832         | 141.576054       | D    | 2375.071618        | 1188.039447       | 2358.045069        | 1179.526172      | 2357.061053        | 1179.034164       | 15 |
| 4  | <b>429.197990</b>  | 215.102633      |                |                   | <b>411.187425</b>  | 206.097351       | E    | 2260.044675        | 1130.525975       | 2243.018126        | 1122.012701      | 2242.034110        | 1121.520693       | 14 |
| 5  | <b>544.224933</b>  | 272.616105      |                |                   | 526.214368         | 263.610822       | D    | 2131.002082        | 1066.004679       | 2113.975533        | 1057.491404      | 2112.991517        | 1056.999396       | 13 |
| 6  | 704.255582         | 352.631429      |                |                   | 686.245017         | 343.626147       | C    | 2015.975139        | 1008.491208       | 1998.948590        | 999.977933       | 1997.964574        | 999.485925        | 12 |
| 7  | 791.287610         | 396.147443      |                |                   | 773.277045         | 387.142161       | S    | 1855.944490        | 928.475883        | 1838.917941        | 919.962609       | 1837.933925        | <b>919.470601</b> | 11 |
| 8  | <b>1230.512936</b> | 615.760106      | 1213.486387    | 607.246832        | <b>1212.502371</b> | 606.754824       | Q    | 1768.912462        | 884.959869        | 1751.885913        | 876.446595       | 1750.901897        | 875.954587        | 10 |
| 9  | <b>1393.576265</b> | 697.291771      | 1376.549716    | 688.778496        | 1375.565700        | 688.286488       | Y    | 1329.687136        | 665.347206        | 1312.660587        | 656.833932       | 1311.676571        | 656.341924        | 9  |
| 10 | <b>1522.618858</b> | 761.813067      | 1505.592309    | 753.299793        | 1504.608293        | 752.807785       | E    | <b>1166.623807</b> | 583.815541        | <b>1149.597258</b> | 575.302267       | 1148.613242        | 574.810259        | 8  |
| 11 | <b>1619.671622</b> | 810.339449      | 1602.645073    | 801.826175        | 1601.661057        | 801.334167       | P    | <b>1037.581214</b> | <b>519.294245</b> | 1020.554665        | 510.780971       | <b>1019.570649</b> | 510.288963        | 7  |
| 12 | <b>1732.755686</b> | 866.881481      | 1715.729137    | 858.368207        | 1714.745121        | 857.876198       | I    | 940.528450         | 470.767863        | 923.501901         | 462.254589       | 922.517885         | 461.762581        | 6  |
| 13 | 1829.808450        | 915.407863      | 1812.781901    | 906.894589        | 1811.797885        | 906.402581       | P    | <b>827.444386</b>  | <b>414.225831</b> | 810.417837         | 405.712557       | <b>809.433821</b>  | 405.220549        | 5  |
| 14 | 1886.829914        | 943.918595      | 1869.803365    | <b>935.405321</b> | 1868.819349        | 934.913312       | G    | <b>730.391622</b>  | 365.699449        | 713.365073         | 357.186175       | 712.381057         | 356.694167        | 4  |
| 15 | 1973.861942        | 987.434609      | 1956.835393    | 978.921335        | 1955.851377        | 978.429327       | S    | <b>673.370158</b>  | 337.188717        | 656.343609         | 328.675443       | 655.359593         | 328.183435        | 3  |
| 16 | 2413.087268        | 1207.047272     | 2396.060719    | 1198.533997       | 2395.076703        | 1198.041989      | Q    | <b>586.338130</b>  | 293.672703        | 569.311581         | 285.159429       |                    |                   | 2  |
| 17 |                    |                 |                |                   |                    |                  | K    | 147.112804         | 74.060040         | 130.086255         | 65.546765        |                    |                   | 1  |

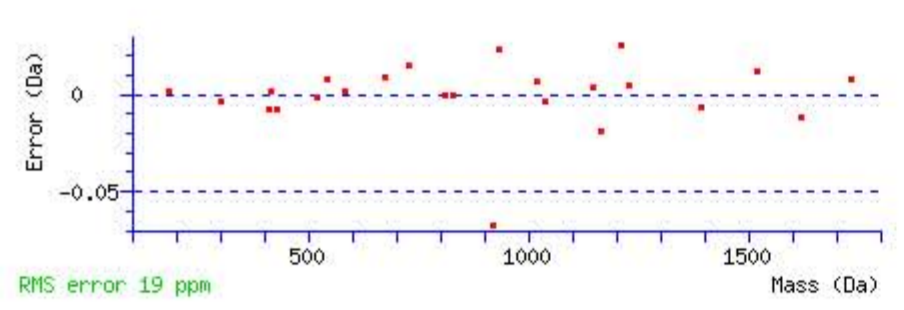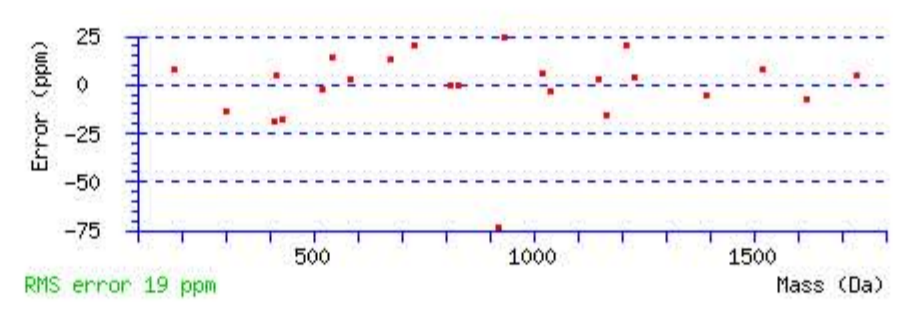

NCBI BLAST search of **AIDEDCSQYEPGPSQK**  
 (Parameters: blastp, nr protein database, expect=20000, no filter, PAM30)  
 Other BLAST [web gateways](#)

### All matches to this query

| Score | Mr(calc):   | Delta     | Sequence                                   |
|-------|-------------|-----------|--------------------------------------------|
| 31.0  | 2558.185501 | -0.002239 | <a href="#">AIDEDCSQYEPGPSQK</a>           |
| 1.1   | 2558.171906 | 0.011356  | <a href="#">QGSGSGQSPGHGQRGSGSRQSPSYGR</a> |

# MASCOT Search Results

## Peptide View

MS/MS Fragmentation of **FGGTICSGDIWDQASCSSSTTCVR**  
Found in **CO8A\_HUMAN**, Complement component C8 alpha chain OS=Homo sapiens GN=C8A PE=1 SV=2

Match to Query 53707: 2962.273242 from(988.431690,3+) rtinseconds(2392) index(34047)  
Title: Locus:1.1.1.3496.25 File:"2013-07-02 CLN FXIII 180 min 3rd F 3.wiff"  
Data file C:\Program Files (x86)\Matrix Science\Mascot Daemon\mgf9 FXIII 180 min 3rd\mascot\_daemon\_merge.mgf

Click mouse within plot area to zoom in by factor of two about that point  
Or, Plot from  to  Da   
Label all possible matches  Label matches used for scoring

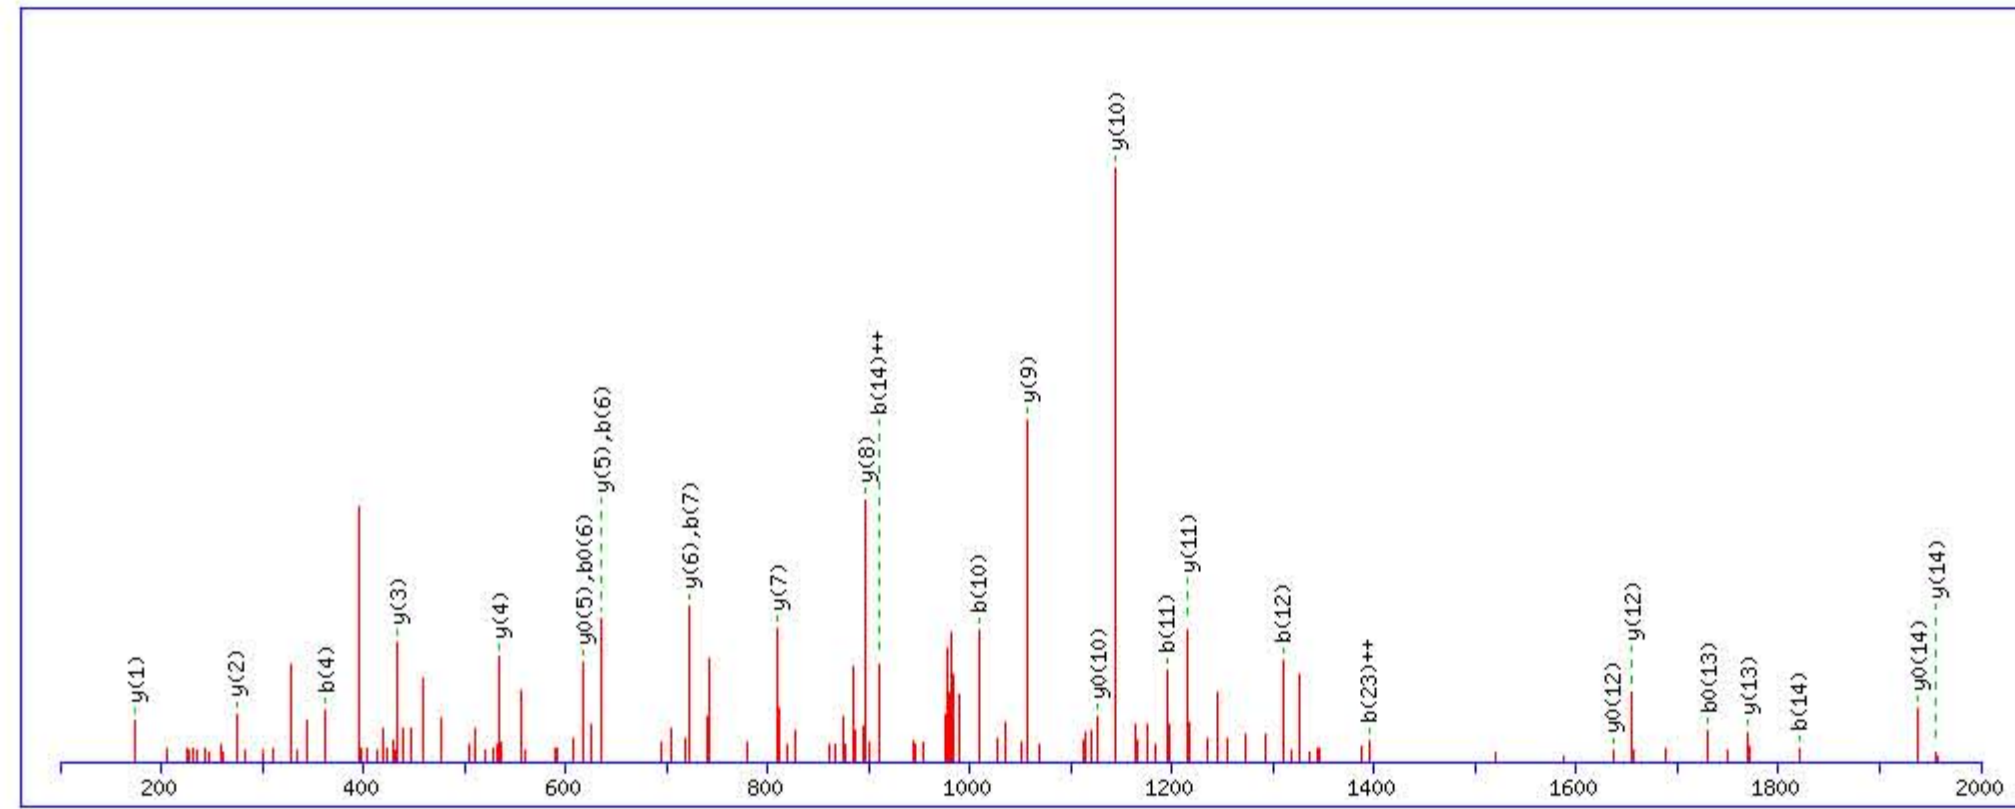

Monoisotopic mass of neutral peptide Mr(calc): 2962.271835  
Fixed modifications: Carbamidomethyl (C) (apply to specified residues or termini only)  
Variable modifications: Q13 : Biotin:Thermo-21345 (Q)  
Ions Score: 109 Expect: 4.2e-011  
Matches : 29/240 fragment ions using 34 most intense peaks [\(help\)](#)

| #  | b                  | b <sup>++</sup>    | b <sup>*</sup> | b <sup>*++</sup> | b <sup>0</sup>     | b <sup>0++</sup> | Seq. | y                  | y <sup>++</sup> | y <sup>*</sup> | y <sup>*++</sup> | y <sup>0</sup>     | y <sup>0++</sup> | #  |
|----|--------------------|--------------------|----------------|------------------|--------------------|------------------|------|--------------------|-----------------|----------------|------------------|--------------------|------------------|----|
| 1  | 148.075690         | 74.541483          |                |                  |                    |                  | F    |                    |                 |                |                  |                    |                  | 24 |
| 2  | 205.097154         | 103.052215         |                |                  |                    |                  | G    | 2816.210649        | 1408.608962     | 2799.184100    | 1400.095688      | 2798.200084        | 1399.603680      | 23 |
| 3  | 262.118618         | 131.562947         |                |                  |                    |                  | G    | 2759.189185        | 1380.098230     | 2742.162636    | 1371.584956      | 2741.178620        | 1371.092948      | 22 |
| 4  | <b>363.166297</b>  | 182.086786         |                |                  | 345.155732         | 173.081504       | T    | 2702.167721        | 1351.587498     | 2685.141172    | 1343.074224      | 2684.157156        | 1342.582216      | 21 |
| 5  | 476.250361         | 238.628818         |                |                  | 458.239796         | 229.623536       | I    | 2601.120042        | 1301.063659     | 2584.093493    | 1292.550384      | 2583.109477        | 1292.058376      | 20 |
| 6  | <b>636.281010</b>  | 318.644143         |                |                  | <b>618.270445</b>  | 309.638861       | C    | 2488.035978        | 1244.521627     | 2471.009429    | 1236.008352      | 2470.025413        | 1235.516344      | 19 |
| 7  | <b>723.313038</b>  | 362.160157         |                |                  | 705.302473         | 353.154875       | S    | 2328.005329        | 1164.506302     | 2310.978780    | 1155.993028      | 2309.994764        | 1155.501020      | 18 |
| 8  | 780.334502         | 390.670889         |                |                  | 762.323937         | 381.665607       | G    | 2240.973301        | 1120.990288     | 2223.946752    | 1112.477014      | 2222.962736        | 1111.985006      | 17 |
| 9  | 895.361445         | 448.184361         |                |                  | 877.350880         | 439.179078       | D    | 2183.951837        | 1092.479556     | 2166.925288    | 1083.966282      | 2165.941272        | 1083.474274      | 16 |
| 10 | <b>1008.445509</b> | 504.726393         |                |                  | 990.434944         | 495.721110       | I    | 2068.924894        | 1034.966085     | 2051.898345    | 1026.452810      | 2050.914329        | 1025.968082      | 15 |
| 11 | <b>1194.524822</b> | 597.766049         |                |                  | 1176.514257        | 588.760767       | W    | <b>1955.840830</b> | 978.424053      | 1938.814281    | 969.910778       | <b>1937.830265</b> | 969.418770       | 14 |
| 12 | <b>1309.551765</b> | 655.279521         |                |                  | 1291.541200        | 646.274238       | D    | <b>1769.761517</b> | 885.384396      | 1752.734968    | 876.871122       | 1751.750952        | 876.379114       | 13 |
| 13 | 1748.777091        | 874.892184         | 1731.750542    | 866.378909       | <b>1730.766526</b> | 865.886901       | Q    | <b>1654.734574</b> | 827.870925      | 1637.708025    | 819.357650       | <b>1636.724009</b> | 818.865642       | 12 |
| 14 | <b>1819.814205</b> | <b>910.410741</b>  | 1802.787656    | 901.897466       | 1801.803640        | 901.405458       | A    | <b>1215.509248</b> | 608.258262      | 1198.482699    | 599.744987       | 1197.498683        | 599.252979       | 11 |
| 15 | 1906.846233        | 953.926755         | 1889.819684    | 945.413480       | 1888.835668        | 944.921472       | S    | <b>1144.472134</b> | 572.739705      | 1127.445585    | 564.226430       | <b>1126.461569</b> | 563.734422       | 10 |
| 16 | 2066.876882        | 1033.942079        | 2049.850333    | 1025.428804      | 2048.866317        | 1024.936796      | C    | <b>1057.440106</b> | 529.223691      | 1040.413557    | 520.710416       | 1039.429541        | 520.218408       | 9  |
| 17 | 2153.908910        | 1077.458093        | 2136.882361    | 1068.944818      | 2135.898345        | 1068.452810      | S    | <b>897.409457</b>  | 449.208366      | 880.382908     | 440.695092       | 879.398892         | 440.203084       | 8  |
| 18 | 2240.940938        | 1120.974107        | 2223.914389    | 1112.460832      | 2222.930373        | 1111.968825      | S    | <b>810.377429</b>  | 405.692352      | 793.350880     | 397.179078       | 792.366864         | 396.687070       | 7  |
| 19 | 2327.972966        | 1164.490121        | 2310.946417    | 1155.976847      | 2309.962401        | 1155.484839      | S    | <b>723.345401</b>  | 362.176338      | 706.318852     | 353.663064       | 705.334836         | 353.171056       | 6  |
| 20 | 2429.020645        | 1215.013960        | 2411.994096    | 1206.500686      | 2411.010080        | 1206.008678      | T    | <b>636.313373</b>  | 318.660324      | 619.286824     | 310.147050       | <b>618.302808</b>  | 309.655042       | 5  |
| 21 | 2530.068324        | 1265.537800        | 2513.041775    | 1257.024525      | 2512.057759        | 1256.532517      | T    | <b>535.265694</b>  | 268.136485      | 518.239145     | 259.623210       | 517.255129         | 259.131202       | 4  |
| 22 | 2690.098973        | 1345.553124        | 2673.072424    | 1337.039850      | 2672.088408        | 1336.547842      | C    | <b>434.218015</b>  | 217.612645      | 417.191466     | 209.099371       |                    |                  | 3  |
| 23 | 2789.167387        | <b>1395.087331</b> | 2772.140838    | 1386.574057      | 2771.156822        | 1386.082049      | V    | <b>274.187366</b>  | 137.597321      | 257.160817     | 129.084046       |                    |                  | 2  |
| 24 |                    |                    |                |                  |                    |                  | R    | <b>175.118952</b>  | 88.063114       | 158.092403     | 79.549839        |                    |                  | 1  |

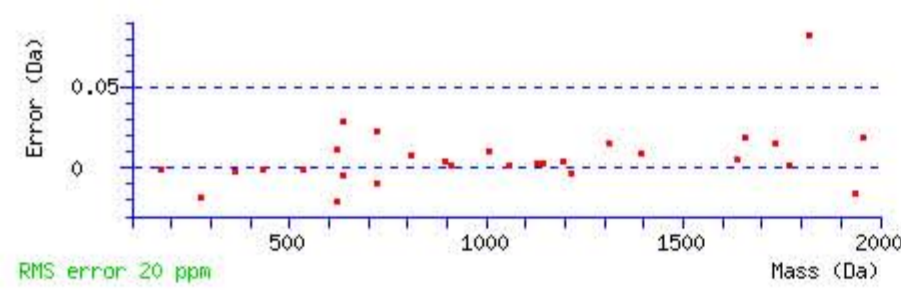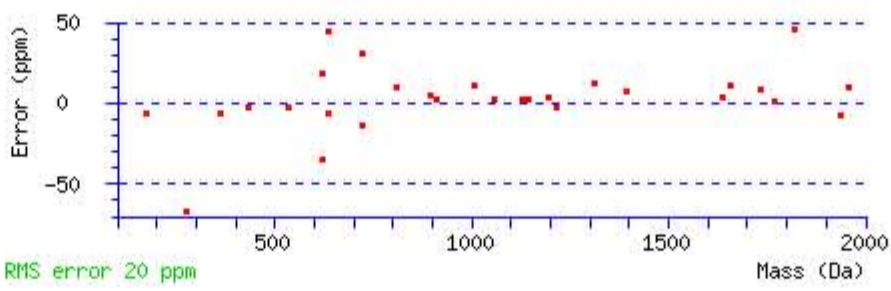

NCBI BLAST search of **FGGTICSGDIWDQASCSSSTTCVR**  
(Parameters: blastp, nr protein database, expect=20000, no filter, PAM30)  
Other BLAST [web gateways](#)

### All matches to this query

| Score | Mr(calc):   | Delta    | Sequence                                 |
|-------|-------------|----------|------------------------------------------|
| 109.4 | 2962.271835 | 0.001407 | <a href="#">FGGTICSGDIWDQASCSSSTTCVR</a> |

Mascot: <http://www.matrixscience.com/>



# MASCOT SEARCH RESULTS

## Peptide View

MS/MS Fragmentation of **QALEEFQK**

Found in **CO8B\_HUMAN**, Complement component C8 beta chain OS=Homo sapiens GN=C8B PE=1 SV=3

Match to Query 20406: 1302.661688 from(652.338120,2+) rtinseconds(1896) index(18288)

Title: Locus:1.1.1.3226.15 File:"2013-07-02 CLN FXIII 180 min 3rd F 2.wiff"

Data file C:\Program Files (x86)\Matrix Science\Mascot Daemon\mgf9 FXIII 180 min 3rd\mascot\_daemon\_merge.mgf

Click mouse within plot area to zoom in by factor of two about that point

Or, Plot from  to  Da

Label all possible matches  Label matches used for scoring

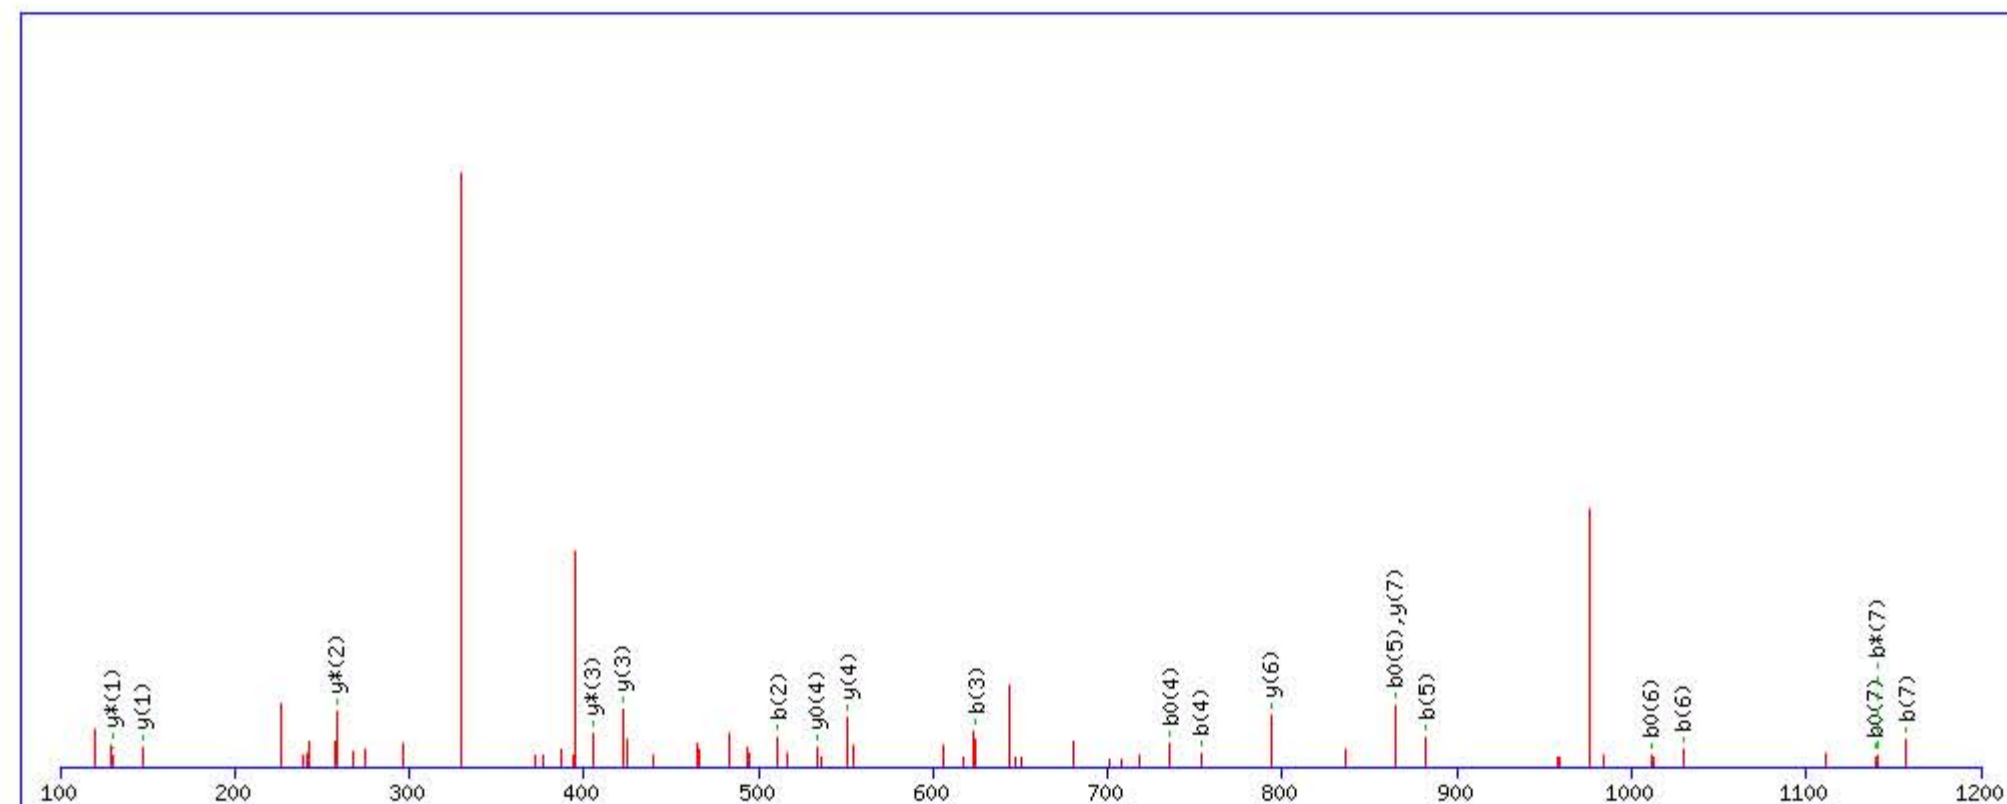

Monoisotopic mass of neutral peptide Mr(calc): 1302.664185

Fixed modifications: Carbamidomethyl (C) (apply to specified residues or termini only)

Variable modifications:

Q1 : Biotin:Thermo-21345 (Q)

Ions Score: 27 Expect: 0.047

Matches : 20/72 fragment ions using 39 most intense peaks [\(help\)](#)

| # | b                  | b <sup>++</sup> | b <sup>*</sup>     | b <sup>***</sup> | b <sup>0</sup>     | b <sup>0++</sup> | Seq. | y                 | y <sup>++</sup> | y <sup>*</sup>    | y <sup>***</sup> | y <sup>0</sup>    | y <sup>0++</sup> | # |
|---|--------------------|-----------------|--------------------|------------------|--------------------|------------------|------|-------------------|-----------------|-------------------|------------------|-------------------|------------------|---|
| 1 | 440.232602         | 220.619939      | 423.206053         | 212.106664       |                    |                  | Q    |                   |                 |                   |                  |                   |                  | 8 |
| 2 | <b>511.269716</b>  | 256.138496      | 494.243167         | 247.625221       |                    |                  | A    | <b>864.446160</b> | 432.726718      | 847.419611        | 424.213443       | 846.435595        | 423.721435       | 7 |
| 3 | <b>624.353780</b>  | 312.680528      | 607.327231         | 304.167254       |                    |                  | L    | <b>793.409046</b> | 397.208161      | 776.382497        | 388.694887       | 775.398481        | 388.202879       | 6 |
| 4 | <b>753.396373</b>  | 377.201825      | 736.369824         | 368.688550       | <b>735.385808</b>  | 368.196542       | E    | 680.324982        | 340.666129      | 663.298433        | 332.152854       | 662.314417        | 331.660846       | 5 |
| 5 | <b>882.438966</b>  | 441.723121      | 865.412417         | 433.209847       | <b>864.428401</b>  | 432.717839       | E    | <b>551.282389</b> | 276.144833      | 534.255840        | 267.631558       | <b>533.271824</b> | 267.139550       | 4 |
| 6 | <b>1029.507380</b> | 515.257328      | 1012.480831        | 506.744054       | <b>1011.496815</b> | 506.252046       | F    | <b>422.239796</b> | 211.623536      | <b>405.213247</b> | 203.110261       |                   |                  | 3 |
| 7 | <b>1157.565958</b> | 579.286617      | <b>1140.539409</b> | 570.773343       | <b>1139.555393</b> | 570.281334       | Q    | 275.171382        | 138.089329      | <b>258.144833</b> | 129.576054       |                   |                  | 2 |
| 8 |                    |                 |                    |                  |                    |                  | K    | <b>147.112804</b> | 74.060040       | <b>130.086255</b> | 65.546765        |                   |                  | 1 |

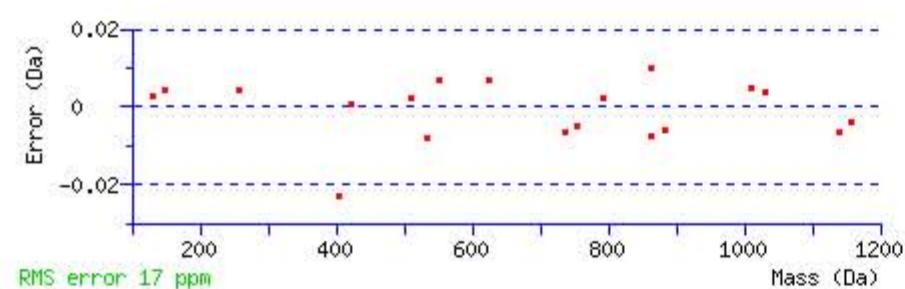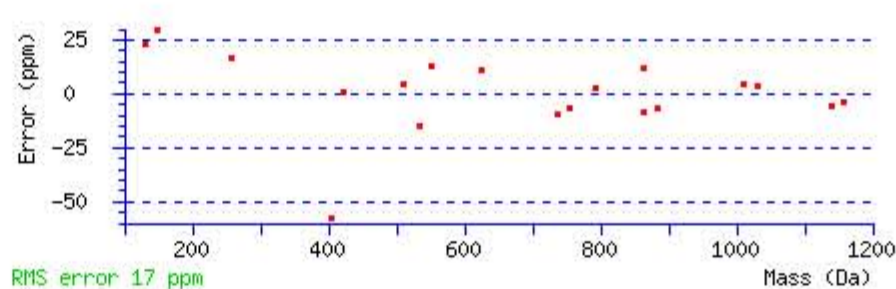

NCBI BLAST search of **QALEEFQK**

(Parameters: blastp, nr protein database, expect=20000, no filter, PAM30)

Other BLAST [web gateways](#)

All matches to this query

| Score | Mr(calc):   | Delta     | Sequence                       |
|-------|-------------|-----------|--------------------------------|
| 27.4  | 1302.664185 | -0.002497 | <a href="#">QALEEFQK</a>       |
| 18.3  | 1302.650269 | 0.011419  | <a href="#">YLKQQCHAQK</a>     |
| 12.9  | 1302.667542 | -0.005854 | <a href="#">KEALMQEK</a>       |
| 7.7   | 1302.660141 | 0.001547  | <a href="#">EAEGKLAAQMOK</a>   |
| 7.4   | 1302.660187 | 0.001501  | <a href="#">QPPVTMETTKR</a>    |
| 7.4   | 1302.643097 | 0.018591  | <a href="#">CQLGFFGFSIK</a>    |
| 7.3   | 1302.668030 | -0.006342 | <a href="#">YLKQQQDAPGR</a>    |
| 7.1   | 1302.649582 | 0.012106  | <a href="#">FYSLLDPSYAK</a>    |
| 6.7   | 1302.668045 | -0.006357 | <a href="#">QPAGPASATPPGPR</a> |
| 5.3   | 1302.667542 | -0.005854 | <a href="#">EAKEMLQK</a>       |

# MASCOT Search Results

## Peptide View

MS/MS Fragmentation of **CEGFVCAQTGR**

Found in **CO8B\_HUMAN**, Complement component C8 beta chain OS=Homo sapiens GN=C8B PE=1 SV=3

Match to Query 30279: 1594.702002 from(532.574610,3+) rtinseconds(1801) index(17738)

Title: Locus:1.1.1.3193.6 File:"2013-07-02 CLN FXIII 180 min 3rd F 2.wiff"

Data file C:\Program Files (x86)\Matrix Science\Mascot Daemon\mgf9 FXIII 180 min 3rd\mascot\_daemon\_merge.mgf

Click mouse within plot area to zoom in by factor of two about that point

Or, Plot from  to  Da

Label all possible matches  Label matches used for scoring

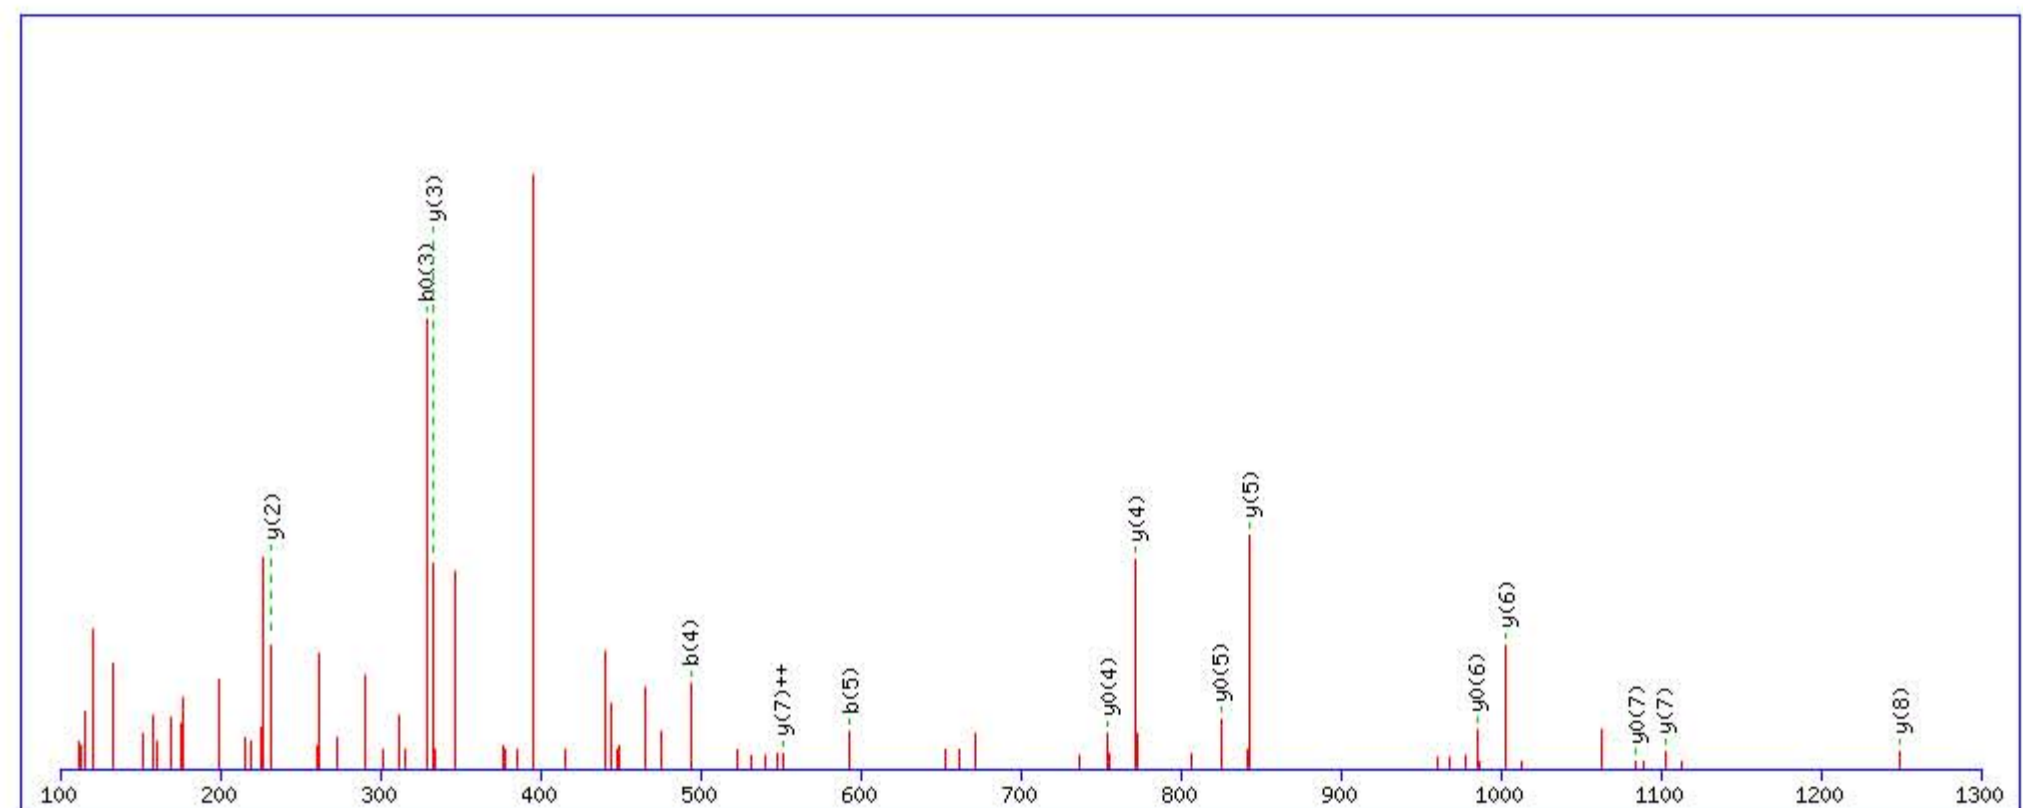

Monoisotopic mass of neutral peptide Mr(calc): 1594.705460

Fixed modifications: Carbamidomethyl (C) (apply to specified residues or termini only)

Variable modifications:

Q8 : Biotin:Thermo-21345 (Q)

Ions Score: 31 Expect: 0.0048

Matches : 15/100 fragment ions using 32 most intense peaks ([help](#))

| #  | b           | b <sup>++</sup> | b <sup>*</sup> | b <sup>*++</sup> | b <sup>0</sup> | b <sup>0++</sup> | Seq. | y           | y <sup>++</sup> | y <sup>*</sup> | y <sup>*++</sup> | y <sup>0</sup> | y <sup>0++</sup> | #  |
|----|-------------|-----------------|----------------|------------------|----------------|------------------|------|-------------|-----------------|----------------|------------------|----------------|------------------|----|
| 1  | 161.037925  | 81.022600       |                |                  |                |                  | C    |             |                 |                |                  |                |                  | 11 |
| 2  | 290.080518  | 145.543897      |                |                  | 272.069953     | 136.538615       | E    | 1435.682069 | 718.344673      | 1418.655520    | 709.831398       | 1417.671504    | 709.339390       | 10 |
| 3  | 347.101982  | 174.054629      |                |                  | 329.091417     | 165.049347       | G    | 1306.639476 | 653.823376      | 1289.612927    | 645.310102       | 1288.628911    | 644.818094       | 9  |
| 4  | 494.170396  | 247.588836      |                |                  | 476.159831     | 238.583554       | F    | 1249.618012 | 625.312644      | 1232.591463    | 616.799370       | 1231.607447    | 616.307361       | 8  |
| 5  | 593.238810  | 297.123043      |                |                  | 575.228245     | 288.117761       | V    | 1102.549598 | 551.778437      | 1085.523049    | 543.265162       | 1084.539033    | 542.773154       | 7  |
| 6  | 753.269459  | 377.138368      |                |                  | 735.258894     | 368.133085       | C    | 1003.481184 | 502.244230      | 986.454635     | 493.730955       | 985.470619     | 493.238947       | 6  |
| 7  | 824.306573  | 412.656925      |                |                  | 806.296008     | 403.651642       | A    | 843.450535  | 422.228906      | 826.423986     | 413.715631       | 825.439970     | 413.223623       | 5  |
| 8  | 1263.531899 | 632.269588      | 1246.505350    | 623.756313       | 1245.521334    | 623.264305       | Q    | 772.413421  | 386.710349      | 755.386872     | 378.197074       | 754.402856     | 377.705066       | 4  |
| 9  | 1364.579578 | 682.793427      | 1347.553029    | 674.280153       | 1346.569013    | 673.788145       | T    | 333.188095  | 167.097685      | 316.161546     | 158.584411       | 315.177530     | 158.092403       | 3  |
| 10 | 1421.601042 | 711.304159      | 1404.574493    | 702.790885       | 1403.590477    | 702.298877       | G    | 232.140416  | 116.573846      | 215.113867     | 108.060571       |                |                  | 2  |
| 11 |             |                 |                |                  |                |                  | R    | 175.118952  | 88.063114       | 158.092403     | 79.549839        |                |                  | 1  |

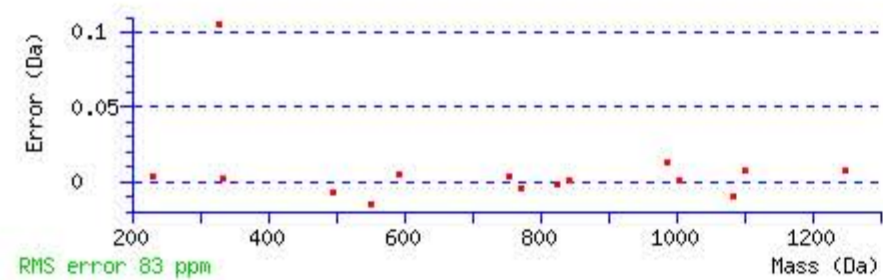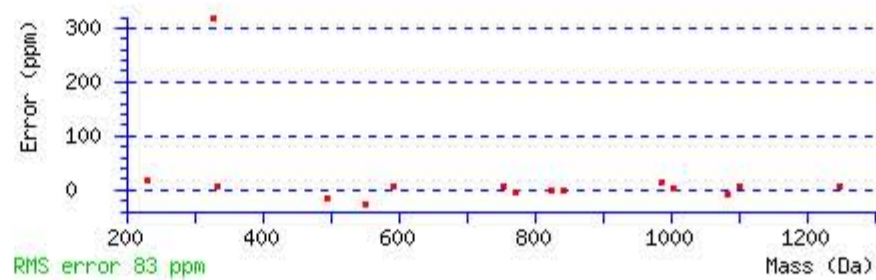

NCBI BLAST search of [CEGFVCAQTGR](#)

(Parameters: blastp, nr protein database, expect=20000, no filter, PAM30)

Other BLAST [web gateways](#)

All matches to this query

| Score | Mr(calc):   | Delta     | Sequence                    |
|-------|-------------|-----------|-----------------------------|
| 30.7  | 1594.705460 | -0.003458 | <a href="#">CEGFVCAQTGR</a> |

Mascot: <http://www.matrixscience.com/>

# MASCOT Search Results

## Peptide View

MS/MS Fragmentation of **IPGIFELGISSQSDR**

Found in **CO8B\_HUMAN**, Complement component C8 beta chain OS=Homo sapiens GN=C8B PE=1 SV=3

Match to Query 37963: 1929.009162 from(644.010330,3+) rtinseconds(2703) index(23017)

Title: Locus:1.1.1.3506.8 File:"2013-07-02 CLN FXIII 180 min 3rd F 2.wiff"

Data file C:\Program Files (x86)\Matrix Science\Mascot Daemon\mgf9 FXIII 180 min 3rd\mascot\_daemon\_merge.mgf

Click mouse within plot area to zoom in by factor of two about that point

Or, Plot from  to  Da

Label all possible matches  Label matches used for scoring

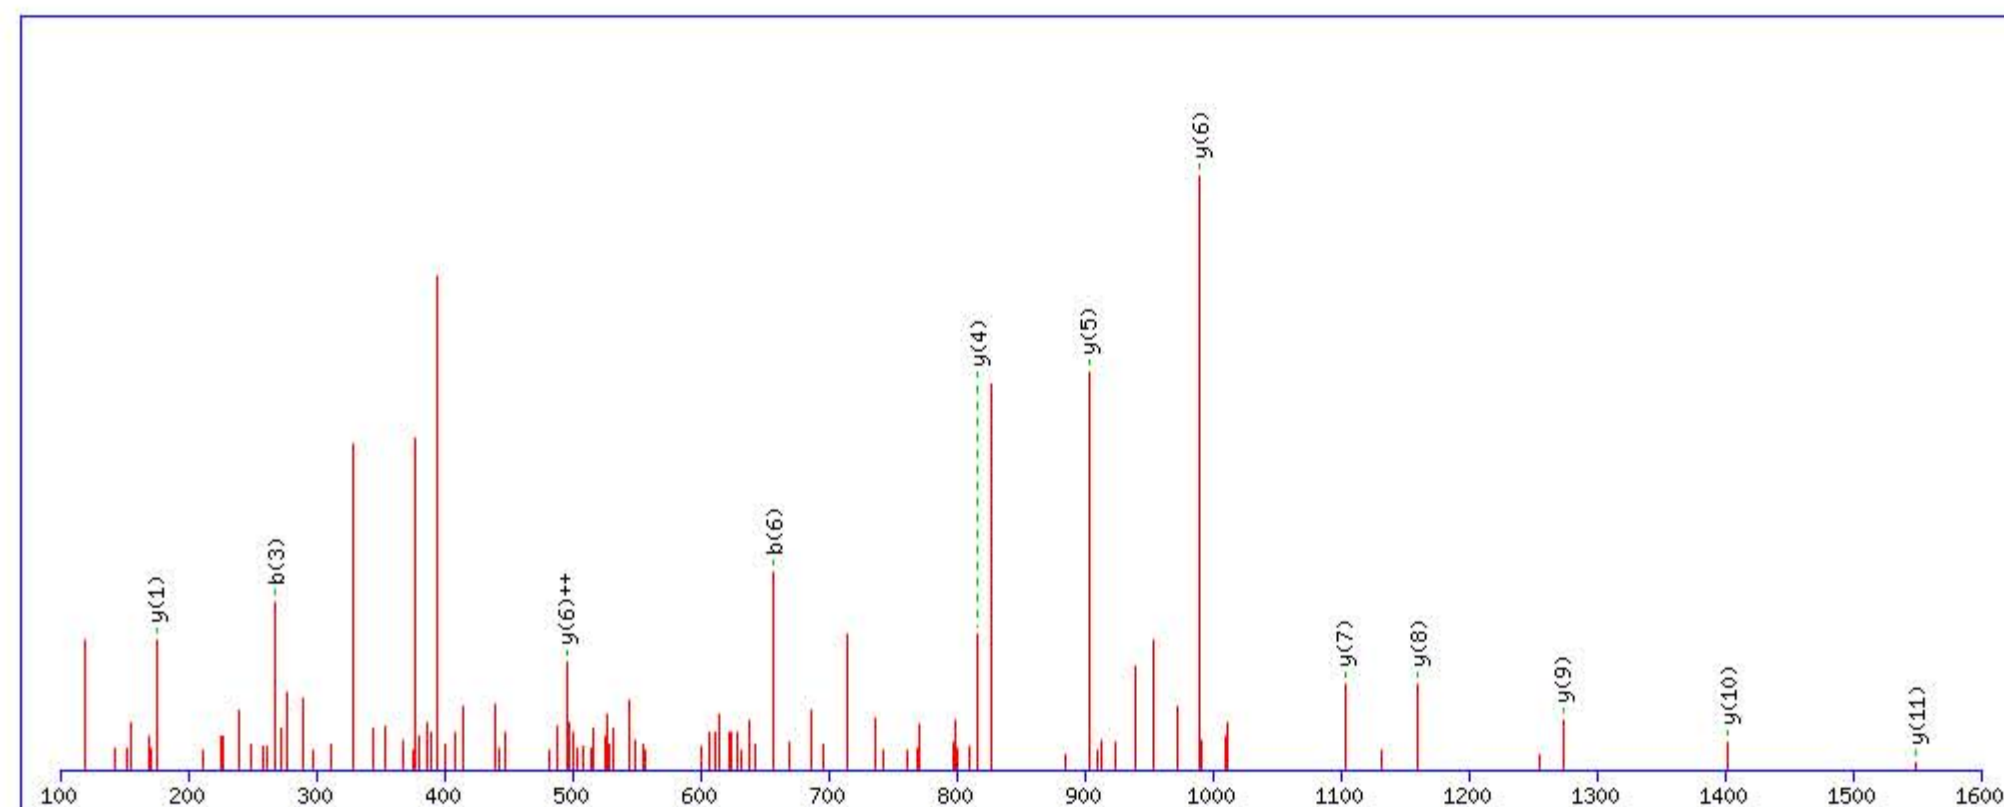

Monoisotopic mass of neutral peptide Mr(calc): 1929.002975

Fixed modifications: Carbamidomethyl (C) (apply to specified residues or termini only)

Variable modifications:

Q12 : Biotin:Thermo-21345 (Q)

Ions Score: 78 Expect: 1.7e-007

Matches : 12/134 fragment ions using 14 most intense peaks [\(help\)](#)

| #  | b                 | b <sup>++</sup> | b <sup>+</sup> | b <sup>+++</sup> | b <sup>0</sup> | b <sup>0++</sup> | Seq. | y                  | y <sup>++</sup>   | y <sup>+</sup> | y <sup>+++</sup> | y <sup>0</sup> | y <sup>0++</sup> | #  |
|----|-------------------|-----------------|----------------|------------------|----------------|------------------|------|--------------------|-------------------|----------------|------------------|----------------|------------------|----|
| 1  | 114.091340        | 57.549308       |                |                  |                |                  | I    |                    |                   |                |                  |                |                  | 15 |
| 2  | 211.144104        | 106.075690      |                |                  |                |                  | P    | 1816.926196        | 908.966736        | 1799.899647    | 900.453462       | 1798.915631    | 899.961454       | 14 |
| 3  | <b>268.165568</b> | 134.586422      |                |                  |                |                  | G    | 1719.873432        | 860.440354        | 1702.846883    | 851.927080       | 1701.862867    | 851.435072       | 13 |
| 4  | 381.249632        | 191.128454      |                |                  |                |                  | I    | 1662.851968        | 831.929622        | 1645.825419    | 823.416348       | 1644.841403    | 822.924340       | 12 |
| 5  | 528.318046        | 264.662661      |                |                  |                |                  | F    | <b>1549.767904</b> | 775.387590        | 1532.741355    | 766.874316       | 1531.757339    | 766.382308       | 11 |
| 6  | <b>657.360639</b> | 329.183958      |                |                  | 639.350074     | 320.178675       | E    | <b>1402.699490</b> | 701.853383        | 1385.672941    | 693.340109       | 1384.688925    | 692.848101       | 10 |
| 7  | 770.444703        | 385.725990      |                |                  | 752.434138     | 376.720707       | L    | <b>1273.656897</b> | 637.332087        | 1256.630348    | 628.818812       | 1255.646332    | 628.326804       | 9  |
| 8  | 827.466167        | 414.236722      |                |                  | 809.455602     | 405.231439       | G    | <b>1160.572833</b> | 580.790055        | 1143.546284    | 572.276780       | 1142.562268    | 571.784772       | 8  |
| 9  | 940.550231        | 470.778754      |                |                  | 922.539666     | 461.773471       | I    | <b>1103.551369</b> | 552.279323        | 1086.524820    | 543.766048       | 1085.540804    | 543.274040       | 7  |
| 10 | 1027.582259       | 514.294768      |                |                  | 1009.571694    | 505.289485       | S    | <b>990.467305</b>  | <b>495.737291</b> | 973.440756     | 487.224016       | 972.456740     | 486.732008       | 6  |
| 11 | 1114.614287       | 557.810782      |                |                  | 1096.603722    | 548.805499       | S    | <b>903.435277</b>  | 452.221277        | 886.408728     | 443.708002       | 885.424712     | 443.215994       | 5  |
| 12 | 1553.839613       | 777.423445      | 1536.813064    | 768.910170       | 1535.829048    | 768.418162       | Q    | <b>816.403249</b>  | 408.705263        | 799.376700     | 400.191988       | 798.392684     | 399.699980       | 4  |
| 13 | 1640.871641       | 820.939459      | 1623.845092    | 812.426184       | 1622.861076    | 811.934176       | S    | 377.177923         | 189.092600        | 360.151374     | 180.579325       | 359.167358     | 180.087317       | 3  |
| 14 | 1755.898584       | 878.452930      | 1738.872035    | 869.939656       | 1737.888019    | 869.447648       | D    | 290.145895         | 145.576585        | 273.119346     | 137.063311       | 272.135330     | 136.571303       | 2  |
| 15 |                   |                 |                |                  |                |                  | R    | <b>175.118952</b>  | 88.063114         | 158.092403     | 79.549839        |                |                  | 1  |

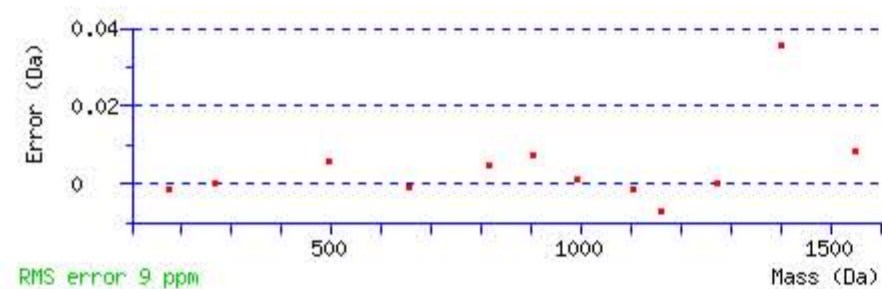

RMS error 9 ppm

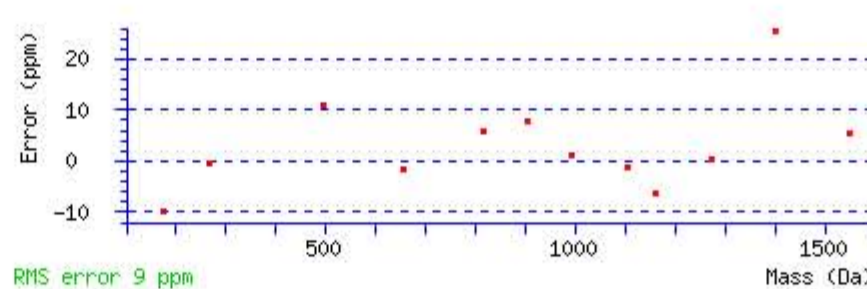

RMS error 9 ppm

NCBI BLAST search of [IPGIFELGISSQSDR](#)

(Parameters: blastp, nr protein database, expect=20000, no filter, PAM30)

Other BLAST [web gateways](#)

All matches to this query

| Score | Mr(calc):   | Delta     | Sequence                          |
|-------|-------------|-----------|-----------------------------------|
| 78.1  | 1929.002975 | 0.006187  | <a href="#">IPGIFELGISSQSDR</a>   |
| 5.6   | 1928.996445 | 0.012717  | <a href="#">QCQVILNFLAAEGR</a>    |
| 1.8   | 1929.020721 | -0.011559 | <a href="#">RELEELSVGSDGVLIVK</a> |
| 1.7   | 1929.018219 | -0.009057 | <a href="#">LPEFLVQLYSYMRVR</a>   |
| 0.1   | 1929.012833 | -0.003671 | <a href="#">EMEERTITIEIPEVLK</a>  |

Mascot: <http://www.matrixscience.com/>

# MASCOT Search Results

## Peptide View

MS/MS Fragmentation of **KPYNVESYTPQTQ GK**

Found in **CO8B\_HUMAN**, Complement component C8 beta chain OS=Homo sapiens GN=C8B PE=1 SV=3

Match to Query 40856: 2050.007952 from(684.343260,3+) rtinseconds(1636) index(16749)

Title: Locus:1.1.1.3135.18 File:"2013-07-02 CLN FXIII 180 min 3rd F 2.wiff"

Data file C:\Program Files (x86)\Matrix Science\Mascot Daemon\mgf\9 FXIII 180 min 3rd\mascot\_daemon\_merge.mgf

Click mouse within plot area to zoom in by factor of two about that point

Or, Plot from 100 to 1800 Da Full range

Label all possible matches  Label matches used for scoring

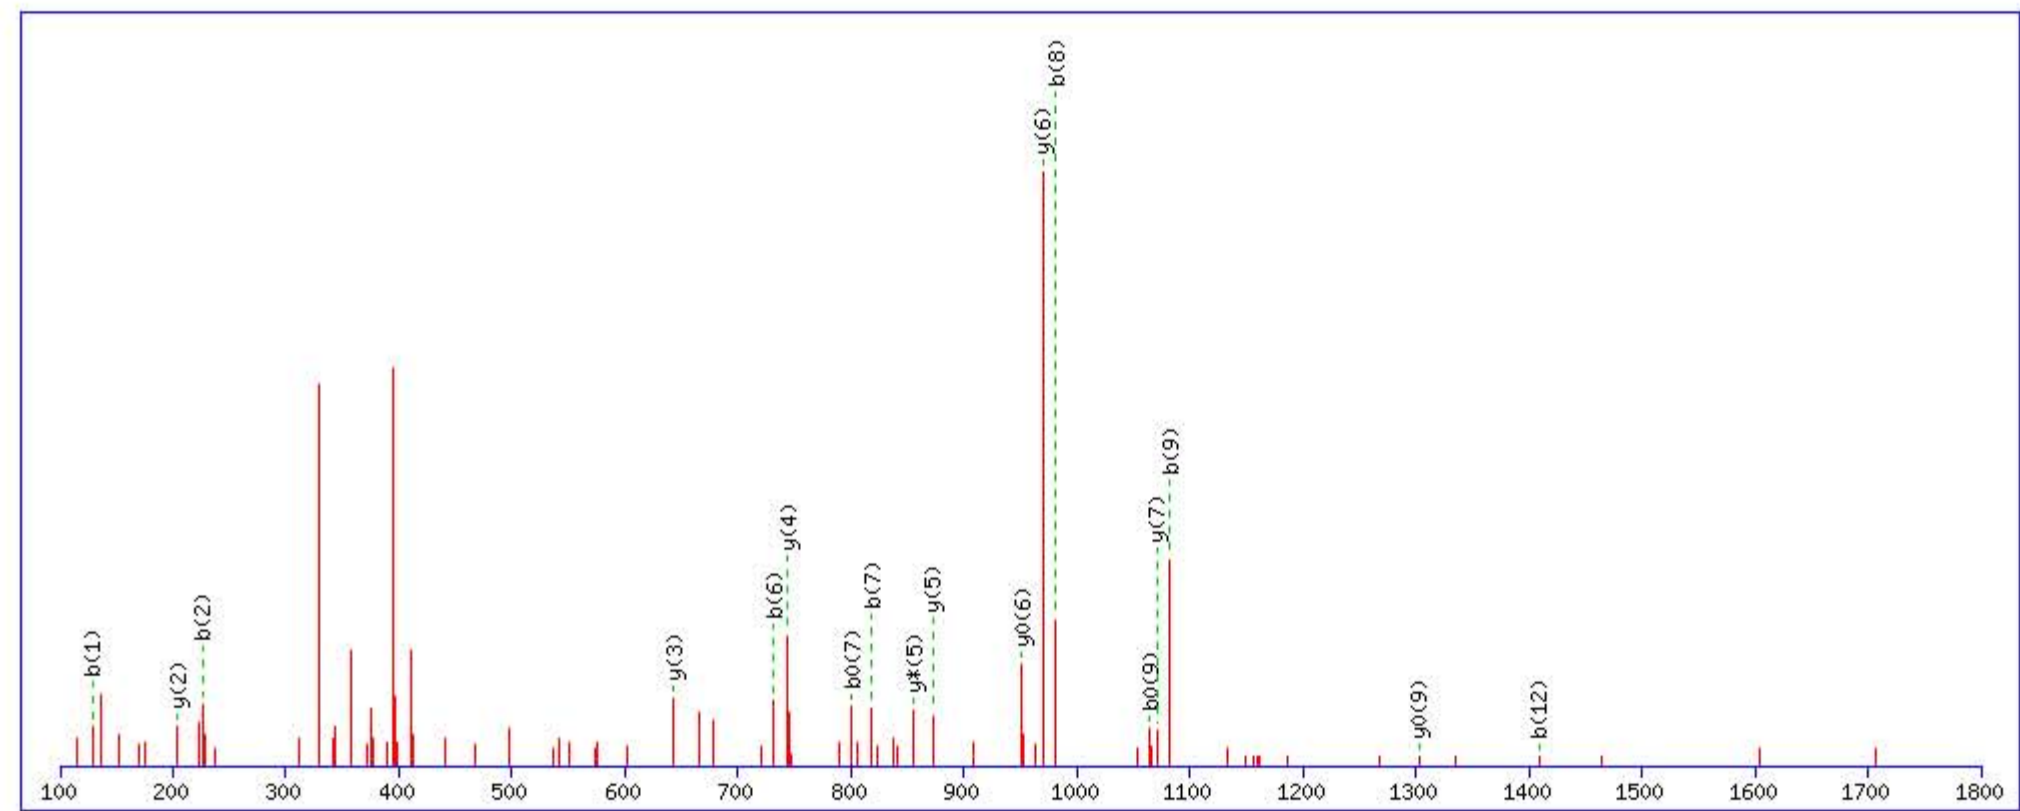

Monoisotopic mass of neutral peptide Mr(calc): 2050.019348

Fixed modifications: Carbamidomethyl (C) (apply to specified residues or termini only)

Variable modifications:

Q13 : Biotin:Thermo-21345 (Q)

Ions Score: 33 Expect: 0.001

Matches : 18/152 fragment ions using 40 most intense peaks (help)

| #  | b           | b <sup>++</sup> | b <sup>*</sup> | b <sup>+++</sup> | b <sup>0</sup> | b <sup>0++</sup> | Seq. | y           | y <sup>++</sup> | y <sup>*</sup> | y <sup>+++</sup> | y <sup>0</sup> | y <sup>0++</sup> | #  |
|----|-------------|-----------------|----------------|------------------|----------------|------------------|------|-------------|-----------------|----------------|------------------|----------------|------------------|----|
| 1  | 129.102239  | 65.054757       | 112.075690     | 56.541483        |                |                  | K    |             |                 |                |                  |                |                  | 15 |
| 2  | 226.155003  | 113.581139      | 209.128454     | 105.067865       |                |                  | P    | 1922.931678 | 961.969477      | 1905.905129    | 953.456203       | 1904.921113    | 952.964195       | 14 |
| 3  | 389.218332  | 195.112804      | 372.191783     | 186.599529       |                |                  | Y    | 1825.878914 | 913.443095      | 1808.852365    | 904.929821       | 1807.868349    | 904.437813       | 13 |
| 4  | 503.261259  | 252.134267      | 486.234710     | 243.620993       |                |                  | N    | 1662.815585 | 831.911431      | 1645.789036    | 823.398156       | 1644.805020    | 822.906148       | 12 |
| 5  | 602.329673  | 301.668475      | 585.303124     | 293.155200       |                |                  | V    | 1548.772658 | 774.889967      | 1531.746109    | 766.376693       | 1530.762093    | 765.884685       | 11 |
| 6  | 731.372266  | 366.189771      | 714.345717     | 357.676497       | 713.361701     | 357.184489       | E    | 1449.704244 | 725.355760      | 1432.677695    | 716.842486       | 1431.693679    | 716.350478       | 10 |
| 7  | 818.404294  | 409.705785      | 801.377745     | 401.192511       | 800.393729     | 400.700503       | S    | 1320.661651 | 660.834464      | 1303.635102    | 652.321189       | 1302.651086    | 651.829181       | 9  |
| 8  | 981.467623  | 491.237450      | 964.441074     | 482.724175       | 963.457058     | 482.232167       | Y    | 1233.629623 | 617.318450      | 1216.603074    | 608.805175       | 1215.619058    | 608.313167       | 8  |
| 9  | 1082.515302 | 541.761289      | 1065.488753    | 533.248015       | 1064.504737    | 532.756007       | T    | 1070.566294 | 535.786785      | 1053.539745    | 527.273511       | 1052.555729    | 526.781503       | 7  |
| 10 | 1179.568066 | 590.287671      | 1162.541517    | 581.774397       | 1161.557501    | 581.282389       | P    | 969.518615  | 485.262946      | 952.492066     | 476.749671       | 951.508050     | 476.257663       | 6  |
| 11 | 1307.626644 | 654.316960      | 1290.600095    | 645.803686       | 1289.616079    | 645.311678       | Q    | 872.465851  | 436.736564      | 855.439302     | 428.223289       | 854.455286     | 427.731281       | 5  |
| 12 | 1408.674323 | 704.840800      | 1391.647774    | 696.327525       | 1390.663758    | 695.835517       | T    | 744.407273  | 372.707275      | 727.380724     | 364.194000       | 726.396708     | 363.701992       | 4  |
| 13 | 1847.899649 | 924.453463      | 1830.873100    | 915.940188       | 1829.889084    | 915.448180       | Q    | 643.359594  | 322.183435      | 626.333045     | 313.670161       |                |                  | 3  |
| 14 | 1904.921113 | 952.964195      | 1887.894564    | 944.450920       | 1886.910548    | 943.958912       | G    | 204.134268  | 102.570772      | 187.107719     | 94.057497        |                |                  | 2  |
| 15 |             |                 |                |                  |                |                  | K    | 147.112804  | 74.060040       | 130.086255     | 65.546765        |                |                  | 1  |

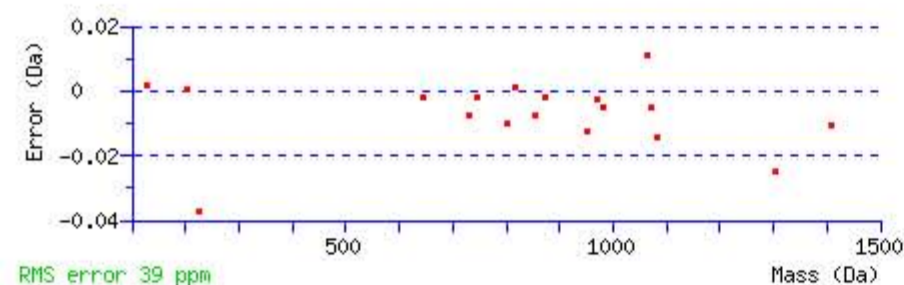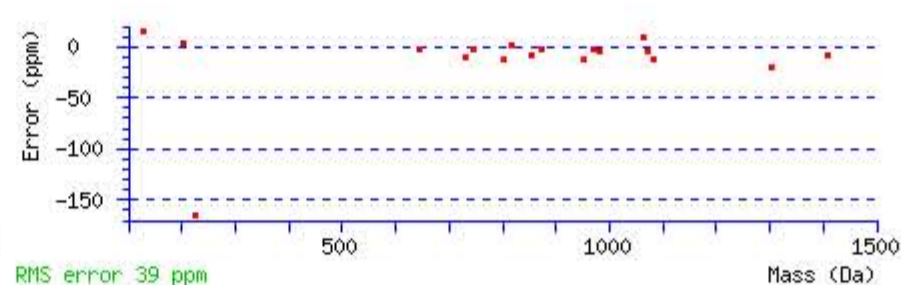

NCBI BLAST search of **KPYNVESYTPQTQ GK**

(Parameters: blastp, nr protein database, expect=20000, no filter, PAM30)

Other BLAST [web gateways](#)

All matches to this query

| Score | Mr(calc):   | Delta     | Sequence                            |
|-------|-------------|-----------|-------------------------------------|
| 33.1  | 2050.019348 | -0.011396 | <a href="#">KPYNVESYTPQTQ GK</a>    |
| 17.6  | 2050.019348 | -0.011396 | <a href="#">KPYNVESYTPQTQ GK</a>    |
| 1.3   | 2050.026566 | -0.018614 | <a href="#">LFVGM LNKQQSEDDVRR</a>  |
| 1.1   | 2050.033966 | -0.026014 | <a href="#">QTVMF TATMPPAVERLAR</a> |

# MASCOT Search Results

## Peptide View

MS/MS Fragmentation of **CDCICPVGSQGLACEVSYR**  
 Found in **CO8B\_HUMAN**, Complement component C8 beta chain OS=Homo sapiens GN=C8B PE=1 SV=3

Match to Query 48965: 2541.097872 from(848.039900,3+) rtinseconds(2185) index(20159)  
 Title: Locus:1.1.1.3326.24 File:"2013-07-02 CLN FXIII 180 min 3rd F 2.wiff"  
 Data file C:\Program Files (x86)\Matrix Science\Mascot Daemon\mgf\9 FXIII 180 min 3rd\mascot\_daemon\_merge.mgf

Click mouse within plot area to zoom in by factor of two about that point

Or, Plot from  to  Da

Label all possible matches  Label matches used for scoring

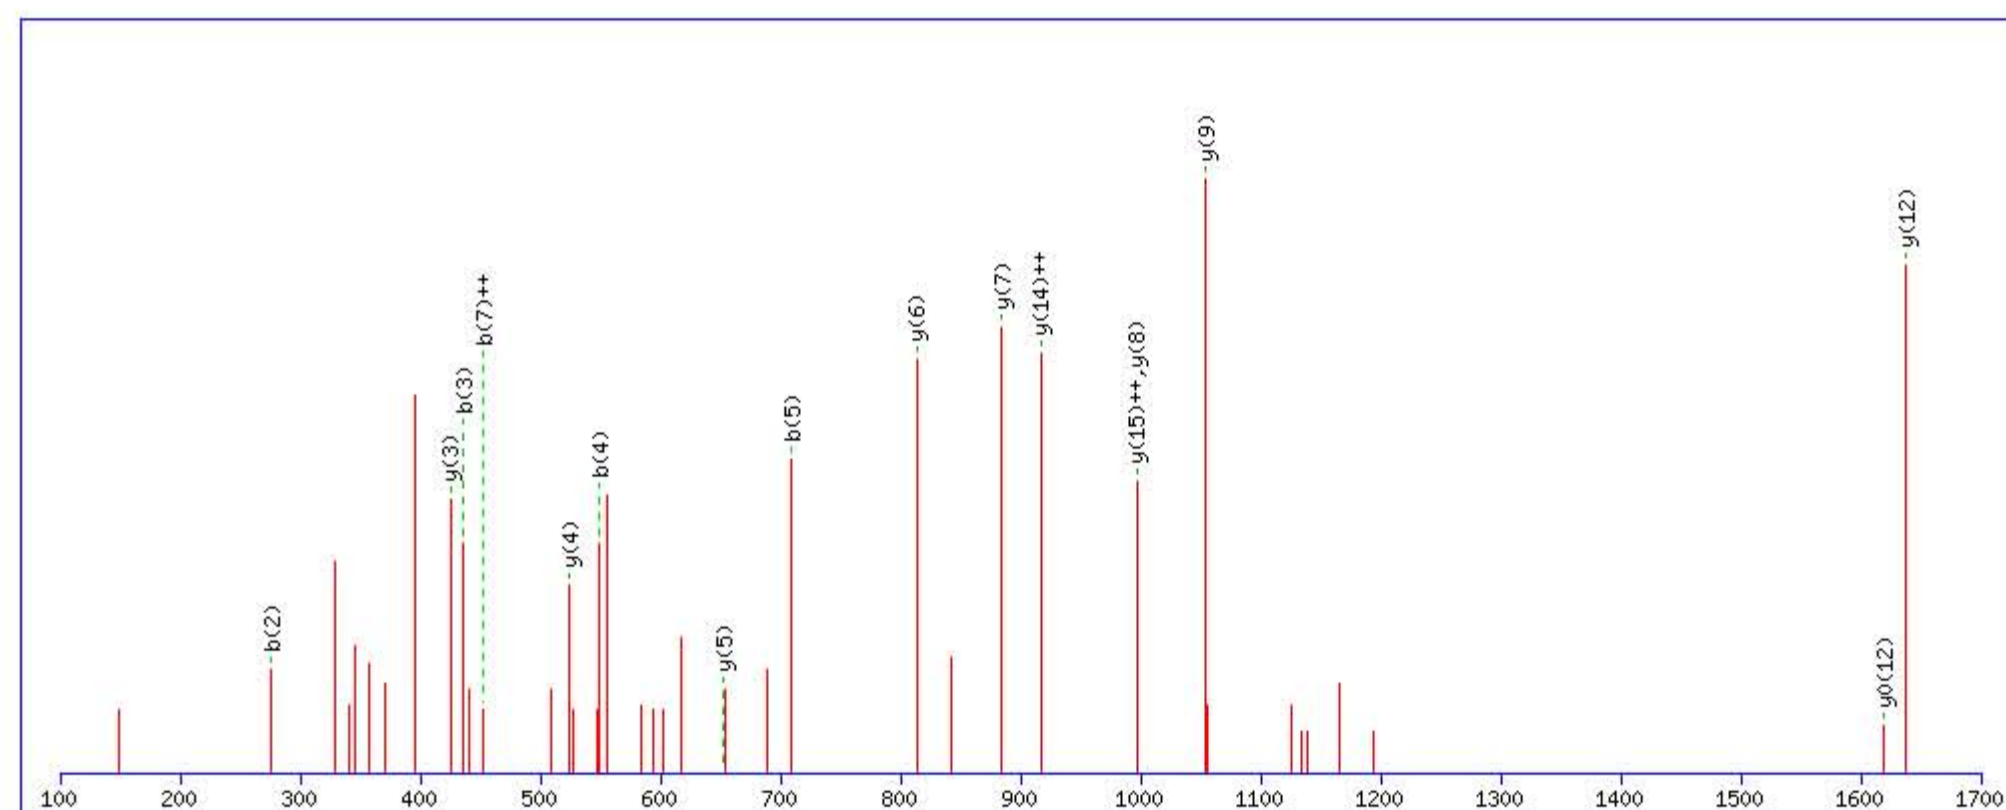

Monoisotopic mass of neutral peptide Mr(calc): 2541.094299  
 Fixed modifications: Carbamidomethyl (C) (apply to specified residues or termini only)  
 Variable modifications:  
 Q10 : Biotin:Thermo-21345 (Q)  
 Ions Score: 37 Expect: 0.00075  
 Matches : 16/192 fragment ions using 30 most intense peaks ([help](#))

| #  | b                 | b <sup>++</sup>   | b <sup>+</sup> | b <sup>+++</sup> | b <sup>0</sup> | b <sup>0++</sup> | Seq. | y                  | y <sup>++</sup>   | y <sup>+</sup> | y <sup>+++</sup> | y <sup>0</sup>     | y <sup>0++</sup> | #  |
|----|-------------------|-------------------|----------------|------------------|----------------|------------------|------|--------------------|-------------------|----------------|------------------|--------------------|------------------|----|
| 1  | 161.037925        | 81.022600         |                |                  |                |                  | C    |                    |                   |                |                  |                    |                  | 19 |
| 2  | <b>276.064868</b> | 138.536072        |                |                  | 258.054303     | 129.530790       | D    | 2382.070908        | 1191.539092       | 2365.044359    | 1183.025817      | 2364.060343        | 1182.533809      | 18 |
| 3  | <b>436.095517</b> | 218.551397        |                |                  | 418.084952     | 209.546114       | C    | 2267.043965        | 1134.025620       | 2250.017416    | 1125.512346      | 2249.033400        | 1125.020338      | 17 |
| 4  | <b>549.179581</b> | 275.093429        |                |                  | 531.169016     | 266.088146       | I    | 2107.013316        | 1054.010296       | 2089.986767    | 1045.497021      | 2089.002751        | 1045.005013      | 16 |
| 5  | <b>709.210230</b> | 355.108753        |                |                  | 691.199665     | 346.103471       | C    | 1993.929252        | <b>997.468264</b> | 1976.902703    | 988.954990       | 1975.918687        | 988.462982       | 15 |
| 6  | 806.262994        | 403.635135        |                |                  | 788.252429     | 394.629853       | P    | 1833.898603        | <b>917.452940</b> | 1816.872054    | 908.939665       | 1815.888038        | 908.447657       | 14 |
| 7  | 905.331408        | <b>453.169342</b> |                |                  | 887.320843     | 444.164060       | V    | 1736.845839        | 868.926558        | 1719.819290    | 860.413283       | 1718.835274        | 859.921275       | 13 |
| 8  | 962.352872        | 481.680074        |                |                  | 944.342307     | 472.674792       | G    | <b>1637.777425</b> | 819.392351        | 1620.750876    | 810.879076       | <b>1619.766860</b> | 810.387068       | 12 |
| 9  | 1049.384900       | 525.196088        |                |                  | 1031.374335    | 516.190806       | S    | 1580.755961        | 790.881619        | 1563.729412    | 782.368344       | 1562.745396        | 781.876336       | 11 |
| 10 | 1488.610226       | 744.808751        | 1471.583677    | 736.295477       | 1470.599661    | 735.803469       | Q    | 1493.723933        | 747.365605        | 1476.697384    | 738.852330       | 1475.713368        | 738.360322       | 10 |
| 11 | 1545.631690       | 773.319483        | 1528.605141    | 764.806209       | 1527.621125    | 764.314201       | G    | <b>1054.498607</b> | 527.752941        | 1037.472058    | 519.239667       | 1036.488042        | 518.747659       | 9  |
| 12 | 1658.715754       | 829.861515        | 1641.689205    | 821.348241       | 1640.705189    | 820.856233       | L    | <b>997.477143</b>  | 499.242209        | 980.450594     | 490.728935       | 979.466578         | 490.236927       | 8  |
| 13 | 1729.752868       | 865.380072        | 1712.726319    | 856.866798       | 1711.742303    | 856.374790       | A    | <b>884.393079</b>  | 442.700178        | 867.366530     | 434.186903       | 866.382514         | 433.694895       | 7  |
| 14 | 1889.783517       | 945.395397        | 1872.756968    | 936.882122       | 1871.772952    | 936.390114       | C    | <b>813.355965</b>  | 407.181621        | 796.329416     | 398.668346       | 795.345400         | 398.176338       | 6  |
| 15 | 2018.826110       | 1009.916693       | 2001.799561    | 1001.403419      | 2000.815545    | 1000.911411      | E    | <b>653.325316</b>  | 327.166296        | 636.298767     | 318.653021       | 635.314751         | 318.161013       | 5  |
| 16 | 2117.894524       | 1059.450900       | 2100.867975    | 1050.937625      | 2099.883959    | 1050.445617      | V    | <b>524.282723</b>  | 262.645000        | 507.256174     | 254.131725       | 506.272158         | 253.639717       | 4  |
| 17 | 2204.926552       | 1102.966914       | 2187.900003    | 1094.453639      | 2186.915987    | 1093.961631      | S    | <b>425.214309</b>  | 213.110793        | 408.187760     | 204.597518       | 407.203744         | 204.105510       | 3  |
| 18 | 2367.989881       | 1184.498578       | 2350.963332    | 1175.985304      | 2349.979316    | 1175.493296      | Y    | 338.182281         | 169.594778        | 321.155732     | 161.081504       |                    |                  | 2  |
| 19 |                   |                   |                |                  |                |                  | R    | 175.118952         | 88.063114         | 158.092403     | 79.549839        |                    |                  | 1  |

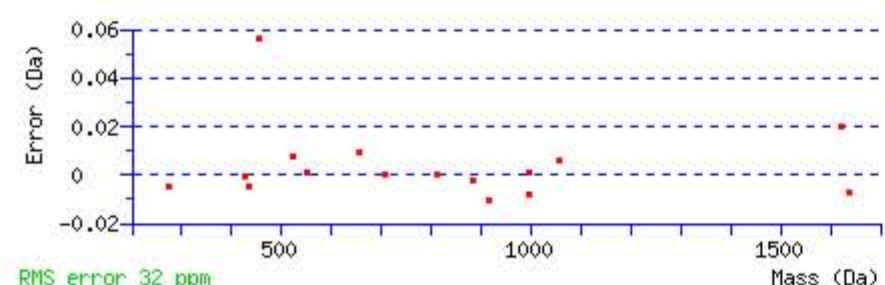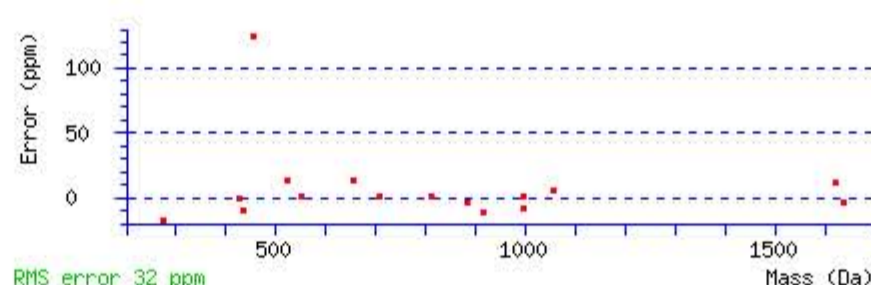

NCBI BLAST search of **CDCICPVGSQGLACEVSYR**  
 (Parameters: blastp, nr protein database, expect=20000, no filter, PAM30)  
 Other BLAST [web gateways](#)

## All matches to this query

| Score | Mr(calc):   | Delta    | Sequence                            |
|-------|-------------|----------|-------------------------------------|
| 37.2  | 2541.094299 | 0.003573 | <a href="#">CDCICPVGSQGLACEVSYR</a> |

# MASCOT SEARCH RESULTS

## Peptide View

MS/MS Fragmentation of **FLQEQGHR**

Found in **CO8G\_HUMAN**, Complement component C8 gamma chain OS=Homo sapiens GN=C8G PE=1 SV=3

Match to Query 20787: 1324.666948 from(663.340750,2+) rtinseconds(1541) index(16123)

Title: Locus:1.1.1.3102.11 File:"2013-07-02 CLN FXIII 180 min 3rd F 2.wiff"

Data file C:\Program Files (x86)\Matrix Science\Mascot Daemon\mgf9 FXIII 180 min 3rd\mascot\_daemon\_merge.mgf

Click mouse within plot area to zoom in by factor of two about that point

Or, Plot from  to  Da

Label all possible matches  Label matches used for scoring

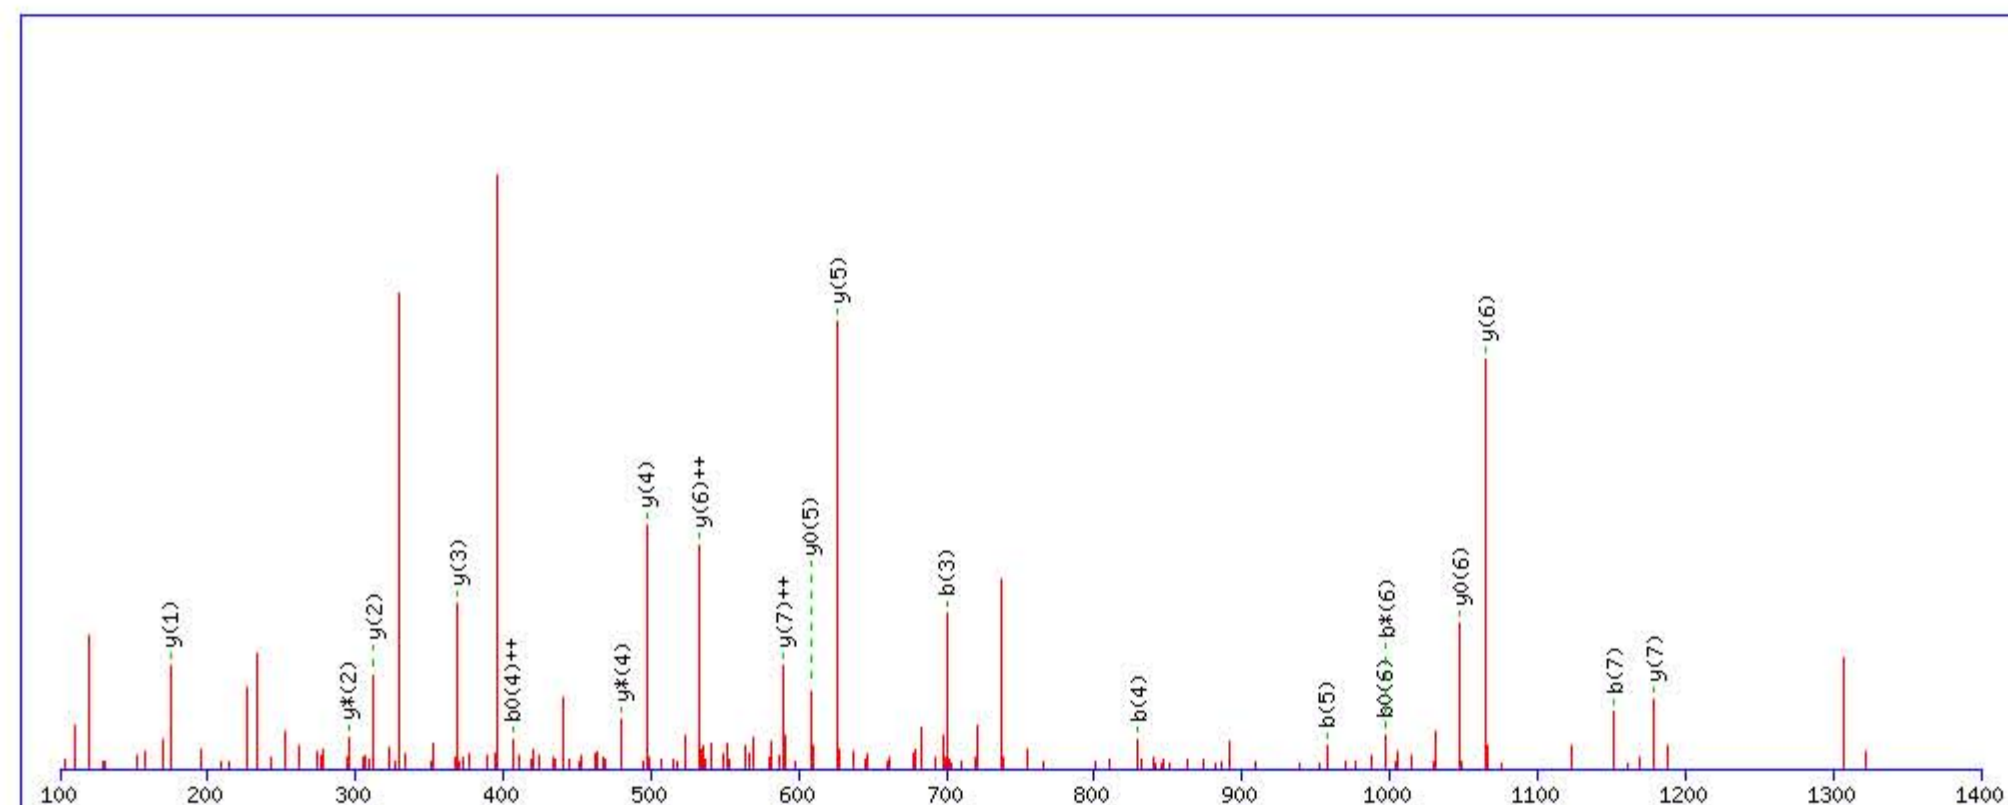

Monoisotopic mass of neutral peptide Mr(calc): 1324.671021

Fixed modifications: Carbamidomethyl (C) (apply to specified residues or termini only)

Variable modifications:

Q3 : Biotin:Thermo-21345 (Q)

Ions Score: 33 Expect: 0.0063

Matches : 20/66 fragment ions using 46 most intense peaks [\(help\)](#)

| # | b                  | b <sup>++</sup> | b <sup>+</sup>    | b <sup>+++</sup> | b <sup>0</sup>    | b <sup>0++</sup>  | Seq. | y                  | y <sup>++</sup>   | y <sup>+</sup>    | y <sup>+++</sup> | y <sup>0</sup>     | y <sup>0++</sup> | # |
|---|--------------------|-----------------|-------------------|------------------|-------------------|-------------------|------|--------------------|-------------------|-------------------|------------------|--------------------|------------------|---|
| 1 | 148.075690         | 74.541483       |                   |                  |                   |                   | F    |                    |                   |                   |                  |                    |                  | 8 |
| 2 | 261.159754         | 131.083515      |                   |                  |                   |                   | L    | <b>1178.609889</b> | <b>589.808583</b> | 1161.583340       | 581.295308       | 1160.599324        | 580.803300       | 7 |
| 3 | <b>700.385080</b>  | 350.696178      | 683.358531        | 342.182904       |                   |                   | Q    | <b>1065.525825</b> | <b>533.266551</b> | 1048.499276       | 524.753276       | <b>1047.515260</b> | 524.261268       | 6 |
| 4 | <b>829.427673</b>  | 415.217475      | 812.401124        | 406.704200       | 811.417108        | <b>406.212192</b> | E    | <b>626.300499</b>  | 313.653888        | 609.273950        | 305.140613       | <b>608.289934</b>  | 304.648605       | 5 |
| 5 | <b>957.486251</b>  | 479.246764      | 940.459702        | 470.733489       | 939.475686        | 470.241481        | Q    | <b>497.257906</b>  | 249.132591        | <b>480.231357</b> | 240.619317       |                    |                  | 4 |
| 6 | 1014.507715        | 507.757496      | <b>997.481166</b> | 499.244221       | <b>996.497150</b> | 498.752213        | G    | <b>369.199328</b>  | 185.103302        | 352.172779        | 176.590028       |                    |                  | 3 |
| 7 | <b>1151.566627</b> | 576.286952      | 1134.540078       | 567.773677       | 1133.556062       | 567.281669        | H    | <b>312.177864</b>  | 156.592570        | <b>295.151315</b> | 148.079296       |                    |                  | 2 |
| 8 |                    |                 |                   |                  |                   |                   | R    | <b>175.118952</b>  | 88.063114         | 158.092403        | 79.549839        |                    |                  | 1 |

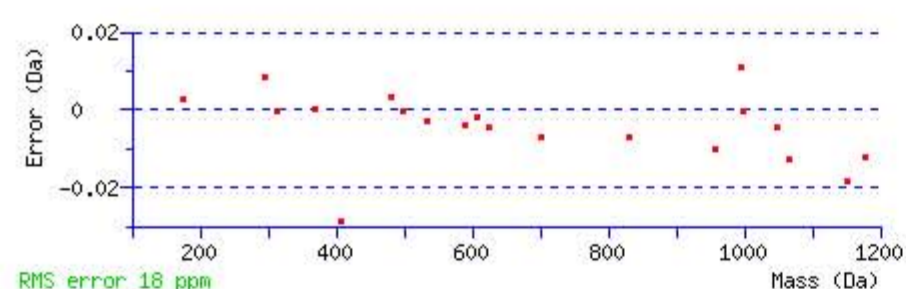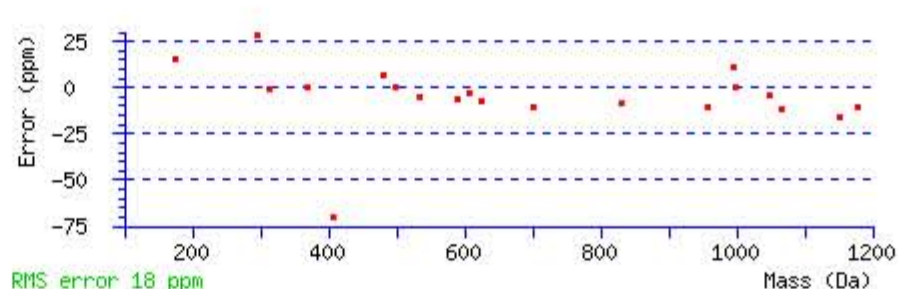

NCBI BLAST search of **FLQEQGHR**

(Parameters: blastp, nr protein database, expect=20000, no filter, PAM30)

Other BLAST [web gateways](#)

All matches to this query

| Score | Mr(calc):   | Delta     | Sequence                     |
|-------|-------------|-----------|------------------------------|
| 32.7  | 1324.671021 | -0.004073 | <a href="#">FLQEQGHR</a>     |
| 10.2  | 1324.671021 | -0.004073 | <a href="#">FLQEQGHR</a>     |
| 8.7   | 1324.669647 | -0.002699 | <a href="#">MKEIAEAYLGK</a>  |
| 8.1   | 1324.663605 | 0.003343  | <a href="#">RLDWEGKEHR</a>   |
| 3.4   | 1324.663620 | 0.003328  | <a href="#">SKSHEFQLGHR</a>  |
| 2.6   | 1324.647888 | 0.019060  | <a href="#">LMKSAIGEGMTR</a> |
| 1.5   | 1324.684753 | -0.017805 | <a href="#">VLVGDRNDNAPR</a> |
| 0.9   | 1324.680908 | -0.013960 | <a href="#">FIASGMDRSLK</a>  |

# MASCOT Search Results

## Peptide View

MS/MS Fragmentation of **VQEAHLTEDQIFYFPK**  
 Found in **CO8G\_HUMAN**, Complement component C8 gamma chain OS=Homo sapiens GN=C8G PE=1 SV=3

Match to Query 27818: 2275.127052 from(759.382960,3+) rtinseconds(2374) index(33934)  
 Title: Locus:1.1.1.3490.15 File:"2013-07-02 CLN FXIII 180 min 3rd F 3.wiff"  
 Data file C:\Program Files (x86)\Matrix Science\Mascot Daemon\mgf9 FXIII 180 min 3rd\mascot\_daemon\_merge.mgf

Click mouse within plot area to zoom in by factor of two about that point  
 Or, Plot from  to  Da   
 Label all possible matches  Label matches used for scoring

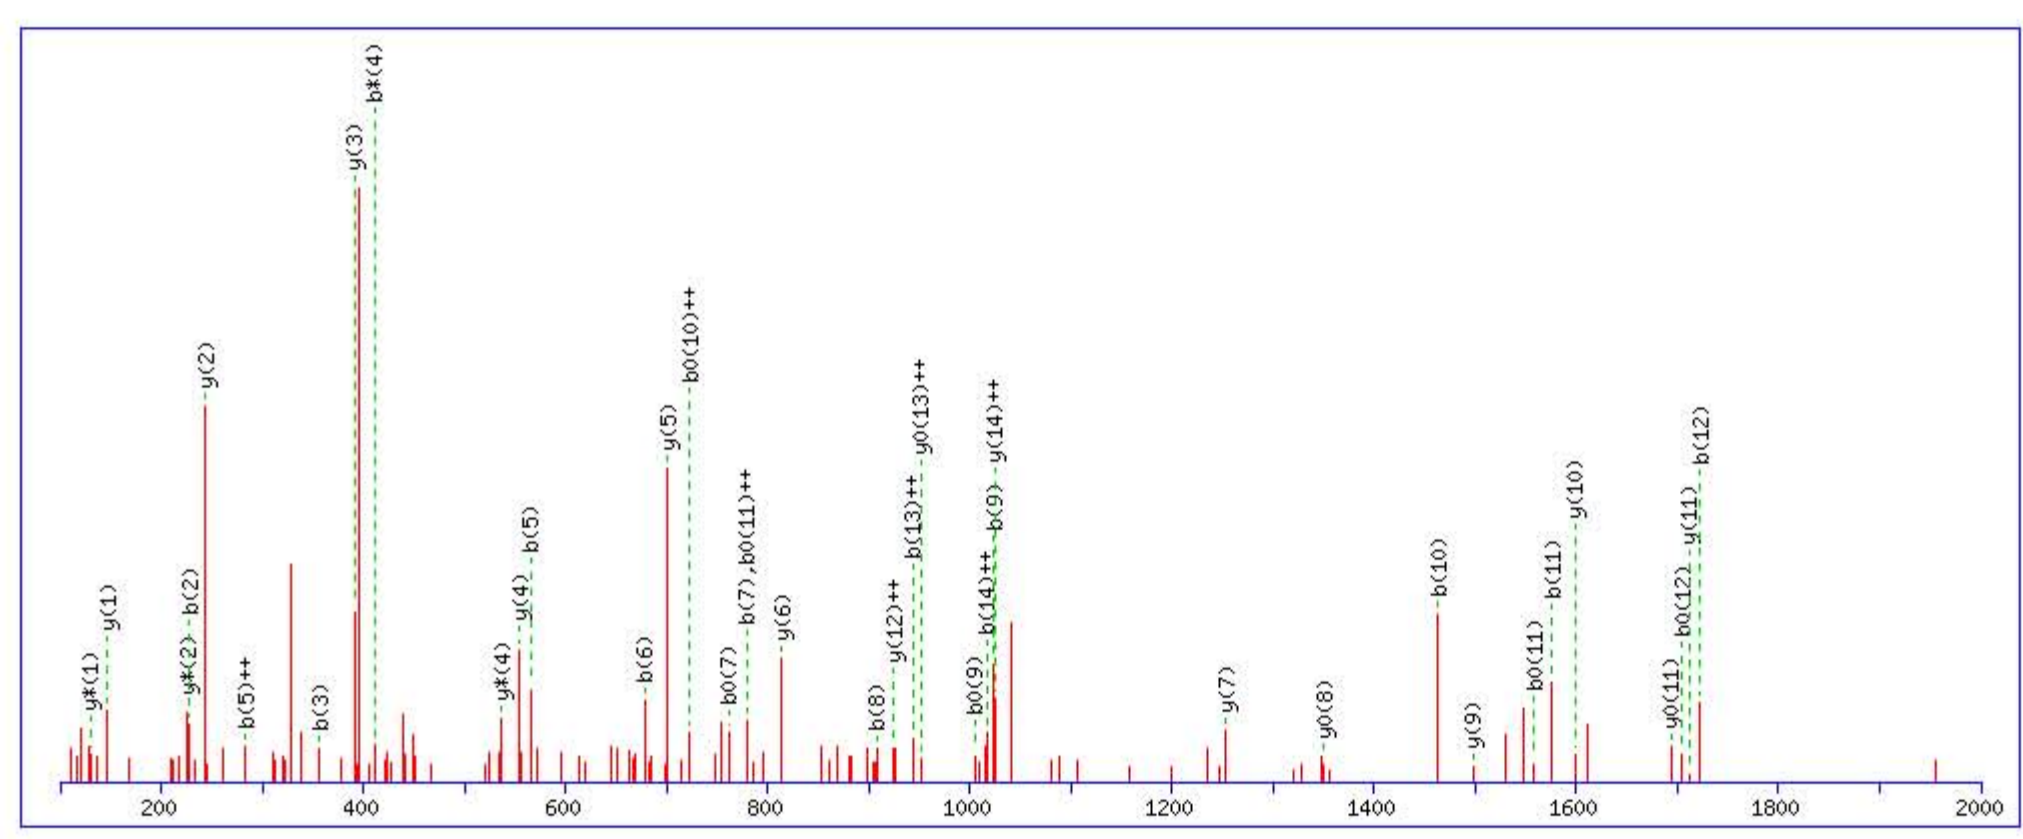

Monoisotopic mass of neutral peptide Mr(calc): 2275.134720  
 Fixed modifications: Carbamidomethyl (C) (apply to specified residues or termini only)  
 Variable modifications:  
 Q10 : Biotin:Thermo-21345 (Q)  
 Ions Score: 43 Expect: 0.00016  
 Matches : 38/160 fragment ions using 86 most intense peaks [\(help\)](#)

| #  | b                  | b <sup>++</sup>    | b <sup>*</sup>    | b <sup>*++</sup> | b <sup>0</sup>     | b <sup>0++</sup>  | Seq. | y                  | y <sup>++</sup>    | y <sup>*</sup>    | y <sup>*++</sup> | y <sup>0</sup>     | y <sup>0++</sup>  | #  |
|----|--------------------|--------------------|-------------------|------------------|--------------------|-------------------|------|--------------------|--------------------|-------------------|------------------|--------------------|-------------------|----|
| 1  | 100.075690         | 50.541483          |                   |                  |                    |                   | V    |                    |                    |                   |                  |                    |                   | 16 |
| 2  | <b>228.134268</b>  | 114.570772         | 211.107719        | 106.057498       |                    |                   | Q    | 2177.073591        | 1089.040433        | 2160.047042       | 1080.527159      | 2159.063026        | 1080.035151       | 15 |
| 3  | <b>357.176861</b>  | 179.092069         | 340.150312        | 170.578794       | 339.166296         | 170.086786        | E    | 2049.015013        | <b>1025.011144</b> | 2031.988464       | 1016.497870      | 2031.004448        | 1016.005862       | 14 |
| 4  | 428.213975         | 214.610626         | <b>411.187426</b> | 206.097351       | 410.203410         | 205.605343        | A    | 1919.972420        | 960.489848         | 1902.945871       | 951.976573       | 1901.961855        | <b>951.484565</b> | 13 |
| 5  | <b>565.272887</b>  | <b>283.140082</b>  | 548.246338        | 274.626807       | 547.262322         | 274.134799        | H    | 1848.935306        | <b>924.971291</b>  | 1831.908757       | 916.458016       | 1830.924741        | 915.966008        | 12 |
| 6  | <b>678.356951</b>  | 339.682114         | 661.330402        | 331.168839       | 660.346386         | 330.676831        | L    | <b>1711.876394</b> | 856.441835         | 1694.849845       | 847.928561       | <b>1693.865829</b> | 847.436552        | 11 |
| 7  | <b>779.404630</b>  | 390.205953         | 762.378081        | 381.692679       | <b>761.394065</b>  | 381.200671        | T    | <b>1598.792330</b> | 799.899803         | 1581.765781       | 791.386529       | 1580.781765        | 790.894521        | 10 |
| 8  | <b>908.447223</b>  | 454.727250         | 891.420674        | 446.213975       | 890.436658         | 445.721967        | E    | <b>1497.744651</b> | 749.375963         | 1480.718102       | 740.862689       | 1479.734086        | 740.370681        | 9  |
| 9  | <b>1023.474166</b> | 512.240721         | 1006.447617       | 503.727447       | <b>1005.463601</b> | 503.235439        | D    | 1368.702058        | 684.854667         | 1351.675509       | 676.341392       | <b>1350.691493</b> | 675.849384        | 8  |
| 10 | <b>1462.699492</b> | 731.853384         | 1445.672943       | 723.340110       | 1444.688927        | <b>722.848101</b> | Q    | <b>1253.675115</b> | 627.341195         | 1236.648566       | 618.827921       |                    |                   | 7  |
| 11 | <b>1575.783556</b> | 788.395416         | 1558.757007       | 779.882141       | <b>1557.772991</b> | <b>779.390133</b> | I    | <b>814.449789</b>  | 407.728533         | 797.423240        | 399.215258       |                    |                   | 6  |
| 12 | <b>1722.851970</b> | 861.929623         | 1705.825421       | 853.416349       | <b>1704.841405</b> | 852.924340        | F    | <b>701.365725</b>  | 351.186501         | 684.339176        | 342.673226       |                    |                   | 5  |
| 13 | 1885.915299        | <b>943.461288</b>  | 1868.888750       | 934.948013       | 1867.904734        | 934.456005        | Y    | <b>554.297311</b>  | 277.652294         | <b>537.270762</b> | 269.139019       |                    |                   | 4  |
| 14 | 2032.983713        | <b>1016.995495</b> | 2015.957164       | 1008.482220      | 2014.973148        | 1007.990212       | F    | <b>391.233982</b>  | 196.120629         | 374.207433        | 187.607354       |                    |                   | 3  |
| 15 | 2130.036477        | 1065.521876        | 2113.009928       | 1057.008602      | 2112.025912        | 1056.516594       | P    | <b>244.165568</b>  | 122.586422         | <b>227.139019</b> | 114.073147       |                    |                   | 2  |
| 16 |                    |                    |                   |                  |                    |                   | K    | <b>147.112804</b>  | 74.060040          | <b>130.086255</b> | 65.546765        |                    |                   | 1  |

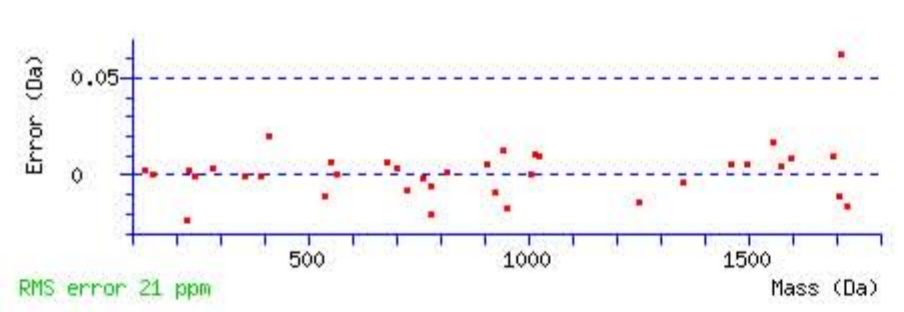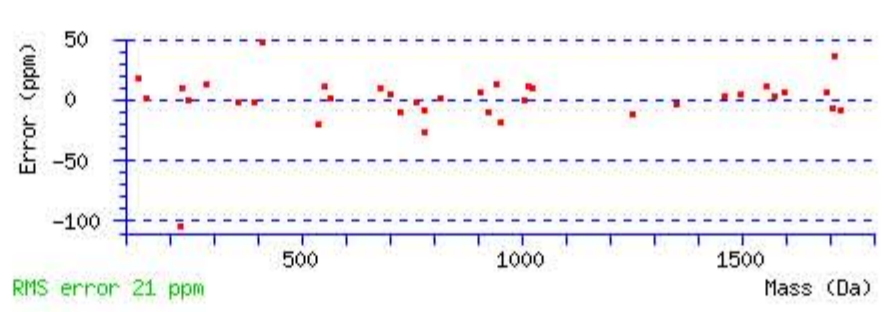

NCBI BLAST search of **VQEAHLTEDQIFYFPK**  
 (Parameters: blastp, nr protein database, expect=20000, no filter, PAM30)  
 Other BLAST [web gateways](#)

### All matches to this query

| Score | Mr(calc):   | Delta     | Sequence                           |
|-------|-------------|-----------|------------------------------------|
| 42.7  | 2275.134720 | -0.007668 | <a href="#">VQEAHLTEDQIFYFPK</a>   |
| 19.9  | 2275.134720 | -0.007668 | <a href="#">VQEAHLTEDQIFYFPK</a>   |
| 2.1   | 2275.116302 | 0.010750  | <a href="#">HTEQQESLDQK</a>        |
| 2.0   | 2275.160538 | -0.033486 | <a href="#">VLPYCWKGMTPEQQAIRK</a> |

# MASCOT Search Results

## Peptide View

MS/MS Fragmentation of **KLDGICWQVR**

Found in **CO8G\_HUMAN**, Complement component C8 gamma chain OS=Homo sapiens GN=C8G PE=1 SV=3

Match to Query 29936: 1584.826188 from(793.420370,2+) rtinseconds(2075) index(19456)

Title: Locus:1.1.1.3288.16 File:"2013-07-02 CLN FXIII 180 min 3rd F 2.wiff"

Data file C:\Program Files (x86)\Matrix Science\Mascot Daemon\mgf9 FXIII 180 min 3rd\mascot\_daemon\_merge.mgf

Click mouse within plot area to zoom in by factor of two about that point

Or, Plot from  to  Da

Label all possible matches  Label matches used for scoring

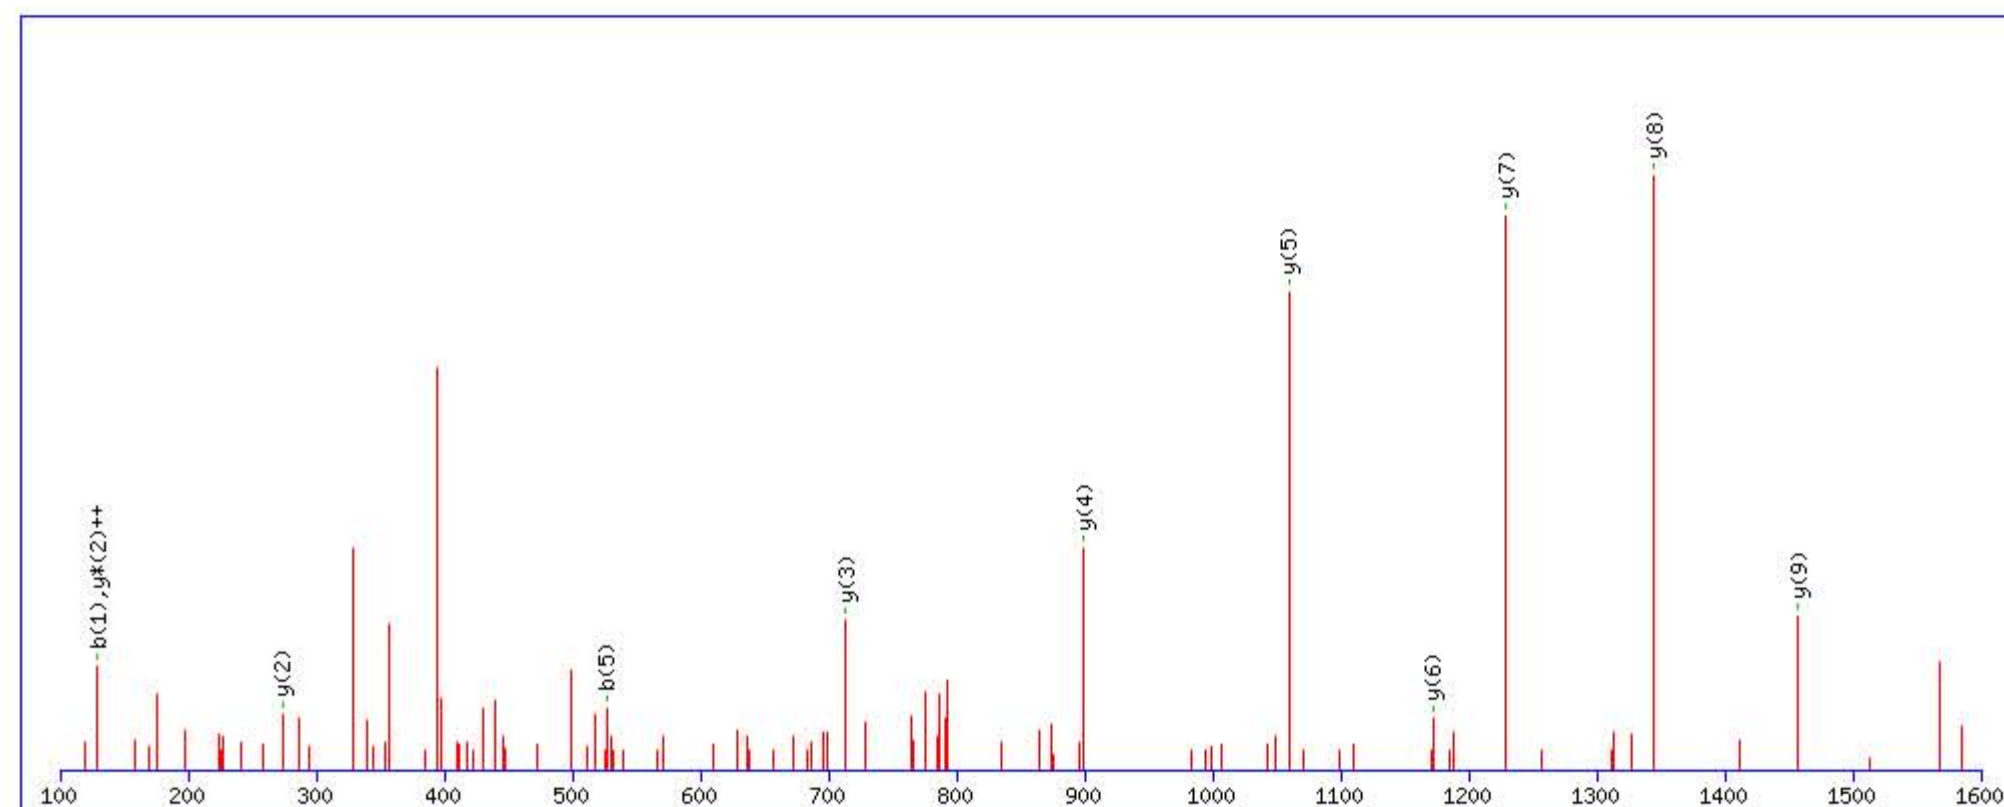

Monoisotopic mass of neutral peptide Mr(calc): 1584.826874

Fixed modifications: Carbamidomethyl (C) (apply to specified residues or termini only)

Variable modifications:

Q8 : Biotin:Thermo-21345 (Q)

Ions Score: 64 Expect: 3.9e-006

Matches : 11/90 fragment ions using 15 most intense peaks [\(help\)](#)

| #  | b                 | b <sup>++</sup> | b <sup>+</sup> | b <sup>+++</sup> | b <sup>0</sup> | b <sup>0++</sup> | Seq.     | y                  | y <sup>++</sup> | y <sup>+</sup> | y <sup>+++</sup>  | y <sup>0</sup> | y <sup>0++</sup> | #         |
|----|-------------------|-----------------|----------------|------------------|----------------|------------------|----------|--------------------|-----------------|----------------|-------------------|----------------|------------------|-----------|
| 1  | <b>129.102239</b> | 65.054757       | 112.075690     | 56.541483        |                |                  | <b>K</b> |                    |                 |                |                   |                |                  | <b>10</b> |
| 2  | 242.186303        | 121.596790      | 225.159754     | 113.083515       |                |                  | <b>L</b> | <b>1457.739189</b> | 729.373233      | 1440.712640    | 720.859958        | 1439.728624    | 720.367950       | <b>9</b>  |
| 3  | 357.213246        | 179.110261      | 340.186697     | 170.596987       | 339.202681     | 170.104979       | <b>D</b> | <b>1344.655125</b> | 672.831201      | 1327.628576    | 664.317926        | 1326.644560    | 663.825918       | <b>8</b>  |
| 4  | 414.234710        | 207.620993      | 397.208161     | 199.107719       | 396.224145     | 198.615711       | <b>G</b> | <b>1229.628182</b> | 615.317729      | 1212.601633    | 606.804455        |                |                  | <b>7</b>  |
| 5  | <b>527.318774</b> | 264.163025      | 510.292225     | 255.649751       | 509.308209     | 255.157743       | <b>I</b> | <b>1172.606718</b> | 586.806997      | 1155.580169    | 578.293723        |                |                  | <b>6</b>  |
| 6  | 687.349423        | 344.178350      | 670.322874     | 335.665075       | 669.338858     | 335.173067       | <b>C</b> | <b>1059.522654</b> | 530.264965      | 1042.496105    | 521.751691        |                |                  | <b>5</b>  |
| 7  | 873.428736        | 437.218006      | 856.402187     | 428.704732       | 855.418171     | 428.212724       | <b>W</b> | <b>899.492005</b>  | 450.249641      | 882.465456     | 441.736366        |                |                  | <b>4</b>  |
| 8  | 1312.654062       | 656.830669      | 1295.627513    | 648.317395       | 1294.643497    | 647.825387       | <b>Q</b> | <b>713.412692</b>  | 357.209984      | 696.386143     | 348.696710        |                |                  | <b>3</b>  |
| 9  | 1411.722476       | 706.364876      | 1394.695927    | 697.851602       | 1393.711911    | 697.359594       | <b>V</b> | <b>274.187366</b>  | 137.597321      | 257.160817     | <b>129.084047</b> |                |                  | <b>2</b>  |
| 10 |                   |                 |                |                  |                |                  | <b>R</b> | 175.118952         | 88.063114       | 158.092403     | 79.549839         |                |                  | <b>1</b>  |

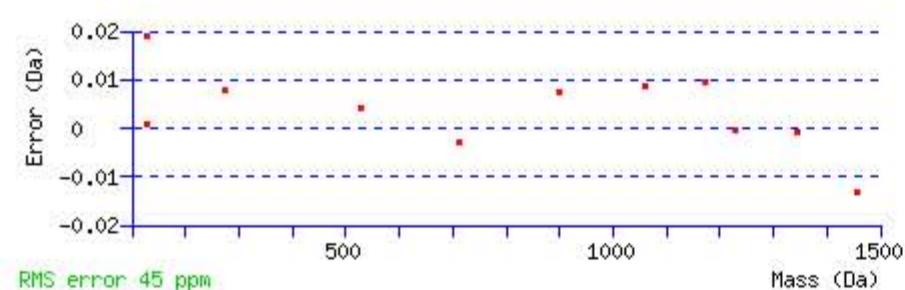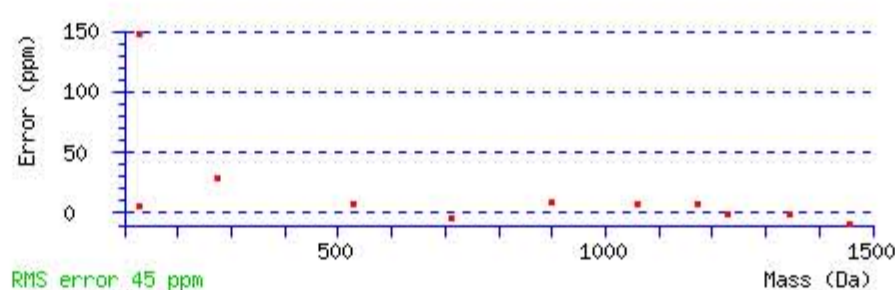

NCBI BLAST search of **KLDGICWQVR**

(Parameters: blastp, nr protein database, expect=20000, no filter, PAM30)

Other BLAST [web gateways](#)

## All matches to this query

| Score | Mr(calc):   | Delta     | Sequence                       |
|-------|-------------|-----------|--------------------------------|
| 63.9  | 1584.826874 | -0.000686 | <a href="#">KLDGICWQVR</a>     |
| 5.9   | 1584.829346 | -0.003158 | <a href="#">GAEATETQAKLR</a>   |
| 4.1   | 1584.844620 | -0.018432 | <a href="#">KAQPKEVMFPPGTR</a> |
| 3.7   | 1584.822845 | 0.003343  | <a href="#">SQMSPQGLRVR</a>    |
| 2.9   | 1584.844620 | -0.018432 | <a href="#">LQSSGIQPAAFR</a>   |
| 2.7   | 1584.810730 | 0.015458  | <a href="#">KVSPDPQKSSDIR</a>  |
| 2.0   | 1584.822830 | 0.003358  | <a href="#">QLDQKCKQAR</a>     |
| 2.0   | 1584.822830 | 0.003358  | <a href="#">QLDQKCKQAR</a>     |
| 1.9   | 1584.829346 | -0.003158 | <a href="#">QAESQINKQTK</a>    |
| 1.8   | 1584.841278 | -0.015090 | <a href="#">QLAWVGDGVVWSIR</a> |



# MASCOT Search Results

## Peptide View

MS/MS Fragmentation of **SLPVSDSVLSGFQQR**

Found in **CO8G\_HUMAN**, Complement component C8 gamma chain OS=Homo sapiens GN=C8G PE=1 SV=3

Match to Query 37977: 1930.982322 from(644.668050,3+) rtinseconds(2529) index(34830)

Title: Locus:1.1.1.3544.9 File:"2013-07-02 CLN FXIII 180 min 3rd F 3.wiff"

Data file C:\Program Files (x86)\Matrix Science\Mascot Daemon\mgf9 FXIII 180 min 3rd\mascot\_daemon\_merge.mgf

Click mouse within plot area to zoom in by factor of two about that point

Or, Plot from  to  Da

Label all possible matches  Label matches used for scoring

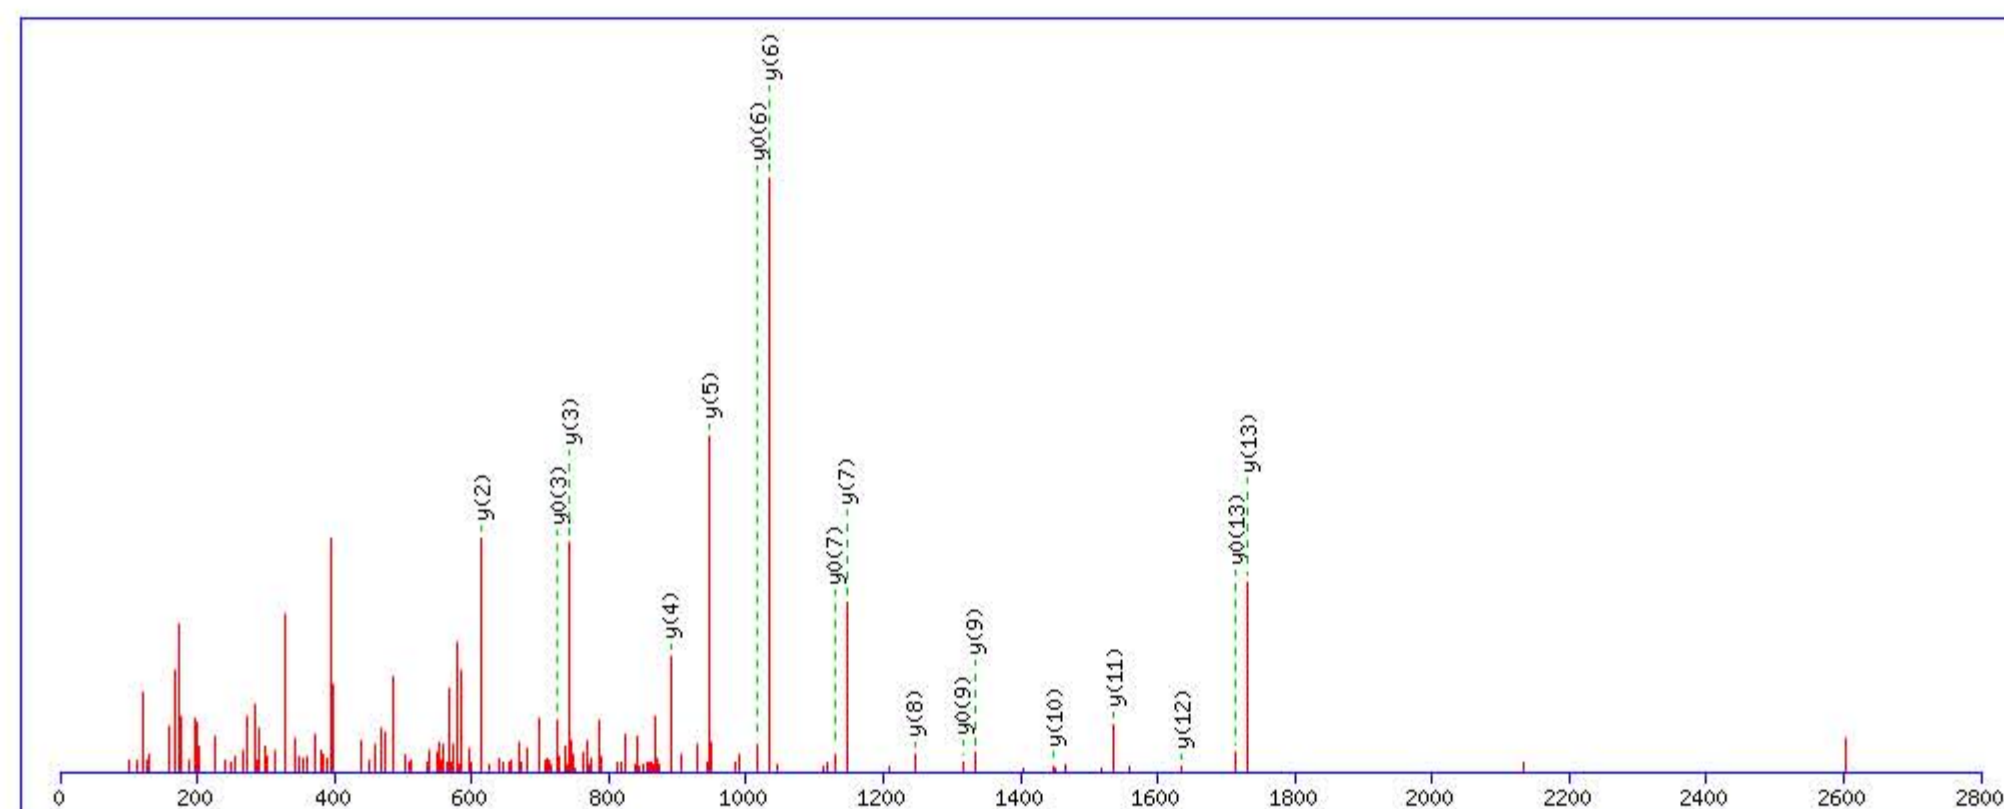

Monoisotopic mass of neutral peptide Mr(calc): 1930.982254

Fixed modifications: Carbamidomethyl (C) (apply to specified residues or termini only)

Variable modifications:

Q14 : Biotin:Thermo-21345 (Q)

Ions Score: 77 Expect: 5.9e-008

Matches : 17/138 fragment ions using 34 most intense peaks [\(help\)](#)

| #  | b           | b <sup>++</sup> | b <sup>*</sup> | b <sup>*++</sup> | b <sup>0</sup> | b <sup>0++</sup> | Seq. | y                  | y <sup>++</sup> | y <sup>*</sup> | y <sup>*++</sup> | y <sup>0</sup>     | y <sup>0++</sup> | #  |
|----|-------------|-----------------|----------------|------------------|----------------|------------------|------|--------------------|-----------------|----------------|------------------|--------------------|------------------|----|
| 1  | 88.039304   | 44.523290       |                |                  | 70.028739      | 35.518008        | S    |                    |                 |                |                  |                    |                  | 15 |
| 2  | 201.123368  | 101.065322      |                |                  | 183.112803     | 92.060039        | L    | 1844.957496        | 922.982386      | 1827.930947    | 914.469112       | 1826.946931        | 913.977104       | 14 |
| 3  | 298.176132  | 149.591704      |                |                  | 280.165567     | 140.586422       | P    | <b>1731.873432</b> | 866.440354      | 1714.846883    | 857.927080       | <b>1713.862867</b> | 857.435072       | 13 |
| 4  | 397.244546  | 199.125911      |                |                  | 379.233981     | 190.120629       | V    | <b>1634.820668</b> | 817.913972      | 1617.794119    | 809.400698       | 1616.810103        | 808.908690       | 12 |
| 5  | 484.276574  | 242.641925      |                |                  | 466.266009     | 233.636643       | S    | <b>1535.752254</b> | 768.379765      | 1518.725705    | 759.866491       | 1517.741689        | 759.374483       | 11 |
| 6  | 599.303517  | 300.155397      |                |                  | 581.292952     | 291.150114       | D    | <b>1448.720226</b> | 724.863751      | 1431.693677    | 716.350477       | 1430.709661        | 715.858469       | 10 |
| 7  | 686.335545  | 343.671411      |                |                  | 668.324980     | 334.666128       | S    | <b>1333.693283</b> | 667.350280      | 1316.666734    | 658.837005       | <b>1315.682718</b> | 658.344997       | 9  |
| 8  | 785.403959  | 393.205618      |                |                  | 767.393394     | 384.200335       | V    | <b>1246.661255</b> | 623.834266      | 1229.634706    | 615.320991       | 1228.650690        | 614.828983       | 8  |
| 9  | 898.488023  | 449.747650      |                |                  | 880.477458     | 440.742367       | L    | <b>1147.592841</b> | 574.300059      | 1130.566292    | 565.786784       | <b>1129.582276</b> | 565.294776       | 7  |
| 10 | 985.520051  | 493.263664      |                |                  | 967.509486     | 484.258381       | S    | <b>1034.508777</b> | 517.758027      | 1017.482228    | 509.244752       | <b>1016.498212</b> | 508.752744       | 6  |
| 11 | 1042.541515 | 521.774395      |                |                  | 1024.530950    | 512.769113       | G    | <b>947.476749</b>  | 474.242013      | 930.450200     | 465.728738       | 929.466184         | 465.236730       | 5  |
| 12 | 1189.609929 | 595.308603      |                |                  | 1171.599364    | 586.303320       | F    | <b>890.455285</b>  | 445.731281      | 873.428736     | 437.218006       | 872.444720         | 436.725998       | 4  |
| 13 | 1318.652522 | 659.829899      |                |                  | 1300.641957    | 650.824617       | E    | <b>743.386871</b>  | 372.197074      | 726.360322     | 363.683799       | <b>725.376306</b>  | 363.191791       | 3  |
| 14 | 1757.877848 | 879.442562      | 1740.851299    | 870.929288       | 1739.867283    | 870.437280       | Q    | <b>614.344278</b>  | 307.675777      | 597.317729     | 299.162503       |                    |                  | 2  |
| 15 |             |                 |                |                  |                |                  | R    | 175.118952         | 88.063114       | 158.092403     | 79.549839        |                    |                  | 1  |

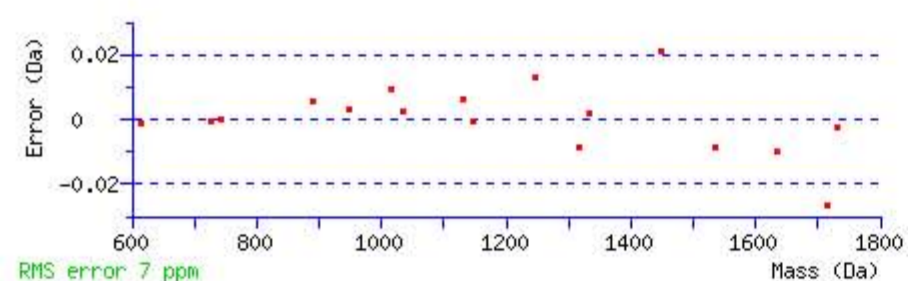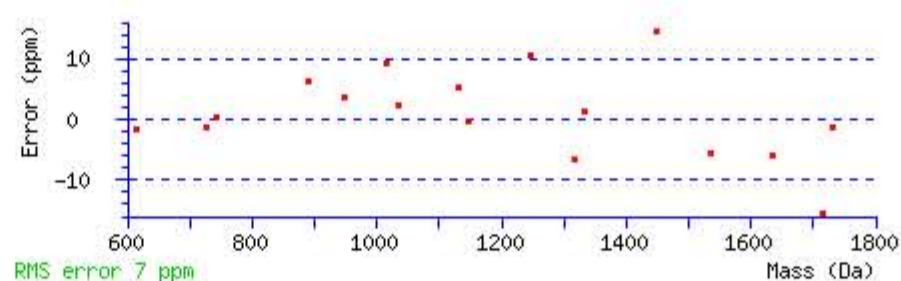

NCBI BLAST search of **SLPVSDSVLSGFQQR**

(Parameters: blastp, nr protein database, expect=20000, no filter, PAM30)

Other BLAST [web gateways](#)

All matches to this query

| Score | Mr(calc):   | Delta     | Sequence                         |
|-------|-------------|-----------|----------------------------------|
| 77.4  | 1930.982254 | 0.000068  | <a href="#">SLPVSDSVLSGFQQR</a>  |
| 0.2   | 1930.989410 | -0.007088 | <a href="#">EAQSQLIKSDEMQLRL</a> |

Mascot: <http://www.matrixscience.com/>

# MASCOT Search Results

## Peptide View

MS/MS Fragmentation of **YGFCEAADQFHVLDEVR**

Found in **CO8G\_HUMAN**, Complement component C8 gamma chain OS=Homo sapiens GN=C8G PE=1 SV=3

Match to Query 45992: 2366.080182 from(789.700670,3+) rtinseconds(2578) index(35013)

Title: Locus:1.1.1.3561.6 File:"2013-07-02 CLN FXIII 180 min 3rd F 3.wiff"

Data file C:\Program Files (x86)\Matrix Science\Mascot Daemon\mgf\9 FXIII 180 min 3rd\mascot\_daemon\_merge.mgf

Click mouse within plot area to zoom in by factor of two about that point

Or, Plot from  to  Da

Label all possible matches  Label matches used for scoring

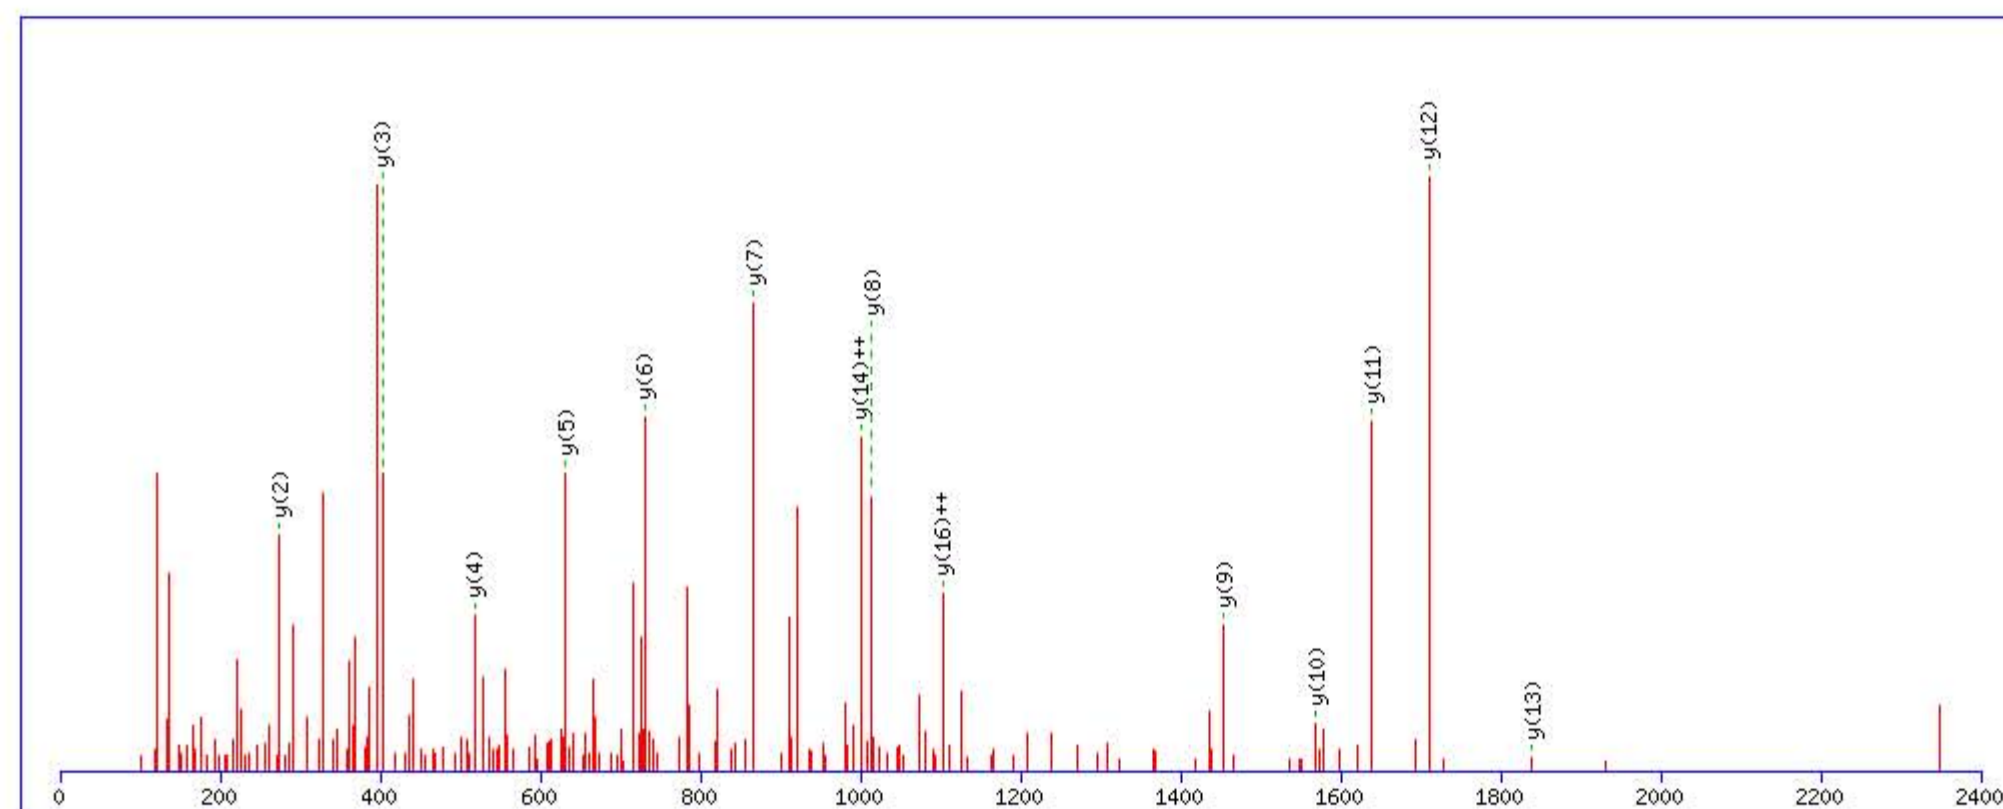

Monoisotopic mass of neutral peptide  $M_r(\text{calc})$ : 2366.082382

Fixed modifications: Carbamidomethyl (C) (apply to specified residues or termini only)

Variable modifications:

Q9 : Biotin:Thermo-21345 (Q)

Ions Score: 98 Expect: 1.8e-009

Matches : 14/164 fragment ions using 20 most intense peaks [\(help\)](#)

| #  | b           | b <sup>++</sup> | b <sup>*</sup> | b <sup>+++</sup> | b <sup>0</sup> | b <sup>0++</sup> | Seq. | y           | y <sup>++</sup> | y <sup>*</sup> | y <sup>+++</sup> | y <sup>0</sup> | y <sup>0++</sup> | #  |
|----|-------------|-----------------|----------------|------------------|----------------|------------------|------|-------------|-----------------|----------------|------------------|----------------|------------------|----|
| 1  | 164.070605  | 82.538940       |                |                  |                |                  | Y    |             |                 |                |                  |                |                  | 17 |
| 2  | 221.092069  | 111.049673      |                |                  |                |                  | G    | 2204.026323 | 1102.516799     | 2186.999774    | 1094.003525      | 2186.015758    | 1093.511517      | 16 |
| 3  | 368.160483  | 184.583879      |                |                  |                |                  | F    | 2147.004859 | 1074.006067     | 2129.978310    | 1065.492793      | 2128.994294    | 1065.000785      | 15 |
| 4  | 528.191132  | 264.599204      |                |                  |                |                  | C    | 1999.936445 | 1000.471860     | 1982.909896    | 991.958586       | 1981.925880    | 991.466578       | 14 |
| 5  | 657.233725  | 329.120501      |                |                  | 639.223160     | 320.115218       | E    | 1839.905796 | 920.456536      | 1822.879247    | 911.943261       | 1821.895231    | 911.451253       | 13 |
| 6  | 728.270839  | 364.639058      |                |                  | 710.260274     | 355.633775       | A    | 1710.863203 | 855.935239      | 1693.836654    | 847.421965       | 1692.852638    | 846.929957       | 12 |
| 7  | 799.307953  | 400.157615      |                |                  | 781.297388     | 391.152332       | A    | 1639.826089 | 820.416682      | 1622.799540    | 811.903408       | 1621.815524    | 811.411400       | 11 |
| 8  | 914.334896  | 457.671086      |                |                  | 896.324331     | 448.665803       | D    | 1568.788975 | 784.898125      | 1551.762426    | 776.384851       | 1550.778410    | 775.892843       | 10 |
| 9  | 1353.560222 | 677.283749      | 1336.533673    | 668.770474       | 1335.549657    | 668.278466       | Q    | 1453.762032 | 727.384654      | 1436.735483    | 718.871379       | 1435.751467    | 718.379371       | 9  |
| 10 | 1500.628636 | 750.817956      | 1483.602087    | 742.304682       | 1482.618071    | 741.812673       | F    | 1014.536706 | 507.771991      | 997.510157     | 499.258717       | 996.526141     | 498.766709       | 8  |
| 11 | 1637.687548 | 819.347412      | 1620.660999    | 810.834138       | 1619.676983    | 810.342129       | H    | 867.468292  | 434.237784      | 850.441743     | 425.724510       | 849.457727     | 425.232502       | 7  |
| 12 | 1736.755962 | 868.881619      | 1719.729413    | 860.368345       | 1718.745397    | 859.876336       | V    | 730.409380  | 365.708328      | 713.382831     | 357.195054       | 712.398815     | 356.703046       | 6  |
| 13 | 1849.840026 | 925.423651      | 1832.813477    | 916.910376       | 1831.829461    | 916.418368       | L    | 631.340966  | 316.174121      | 614.314417     | 307.660846       | 613.330401     | 307.168838       | 5  |
| 14 | 1964.866969 | 982.937122      | 1947.840420    | 974.423848       | 1946.856404    | 973.931840       | D    | 518.256902  | 259.632089      | 501.230353     | 251.118815       | 500.246337     | 250.626807       | 4  |
| 15 | 2093.909562 | 1047.458419     | 2076.883013    | 1038.945144      | 2075.898997    | 1038.453136      | E    | 403.229959  | 202.118617      | 386.203410     | 193.605343       | 385.219394     | 193.113335       | 3  |
| 16 | 2192.977976 | 1096.992626     | 2175.951427    | 1088.479351      | 2174.967411    | 1087.987343      | V    | 274.187366  | 137.597321      | 257.160817     | 129.084046       |                |                  | 2  |
| 17 |             |                 |                |                  |                |                  | R    | 175.118952  | 88.063114       | 158.092403     | 79.549839        |                |                  | 1  |

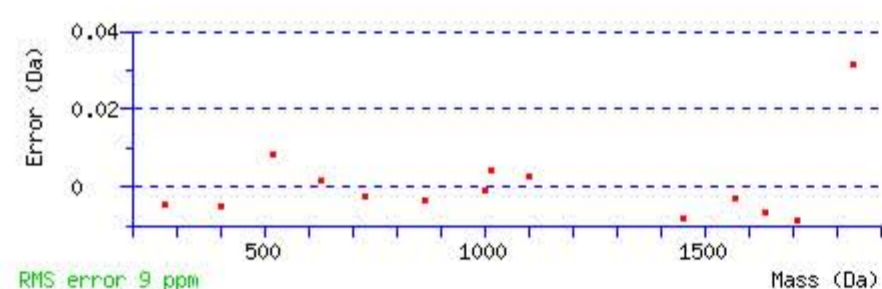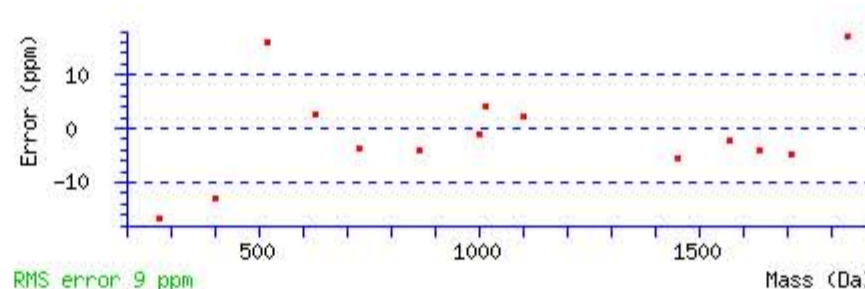

NCBI BLAST search of [YGFCEAADQFHVLDEVR](#)

(Parameters: blastp, nr protein database, expect=20000, no filter, PAM30)

Other BLAST [web gateways](#)

All matches to this query

| Score | $M_r(\text{calc})$ : | Delta     | Sequence                          |
|-------|----------------------|-----------|-----------------------------------|
| 98.0  | 2366.082382          | -0.002200 | <a href="#">YGFCEAADQFHVLDEVR</a> |

Mascot: <http://www.matrixscience.com/>

# MASCOT Search Results

## Peptide View

MS/MS Fragmentation of **TEHYEEQIEAFK**

Found in **CO9\_HUMAN**, Complement component C9 OS=Homo sapiens GN=C9 PE=1 SV=2

Match to Query 36368: 1833.857502 from(612.293110,3+) rtinseconds(1998) index(31866)

Title: Locus:1.1.1.3359.13 File:"2013-07-02 CLN FXIII 180 min 3rd F 3.wiff"

Data file C:\Program Files (x86)\Matrix Science\Mascot Daemon\mgf9 FXIII 180 min 3rd\mascot\_daemon\_merge.mgf

Click mouse within plot area to zoom in by factor of two about that point

Or, Plot from  to  Da

Label all possible matches  Label matches used for scoring

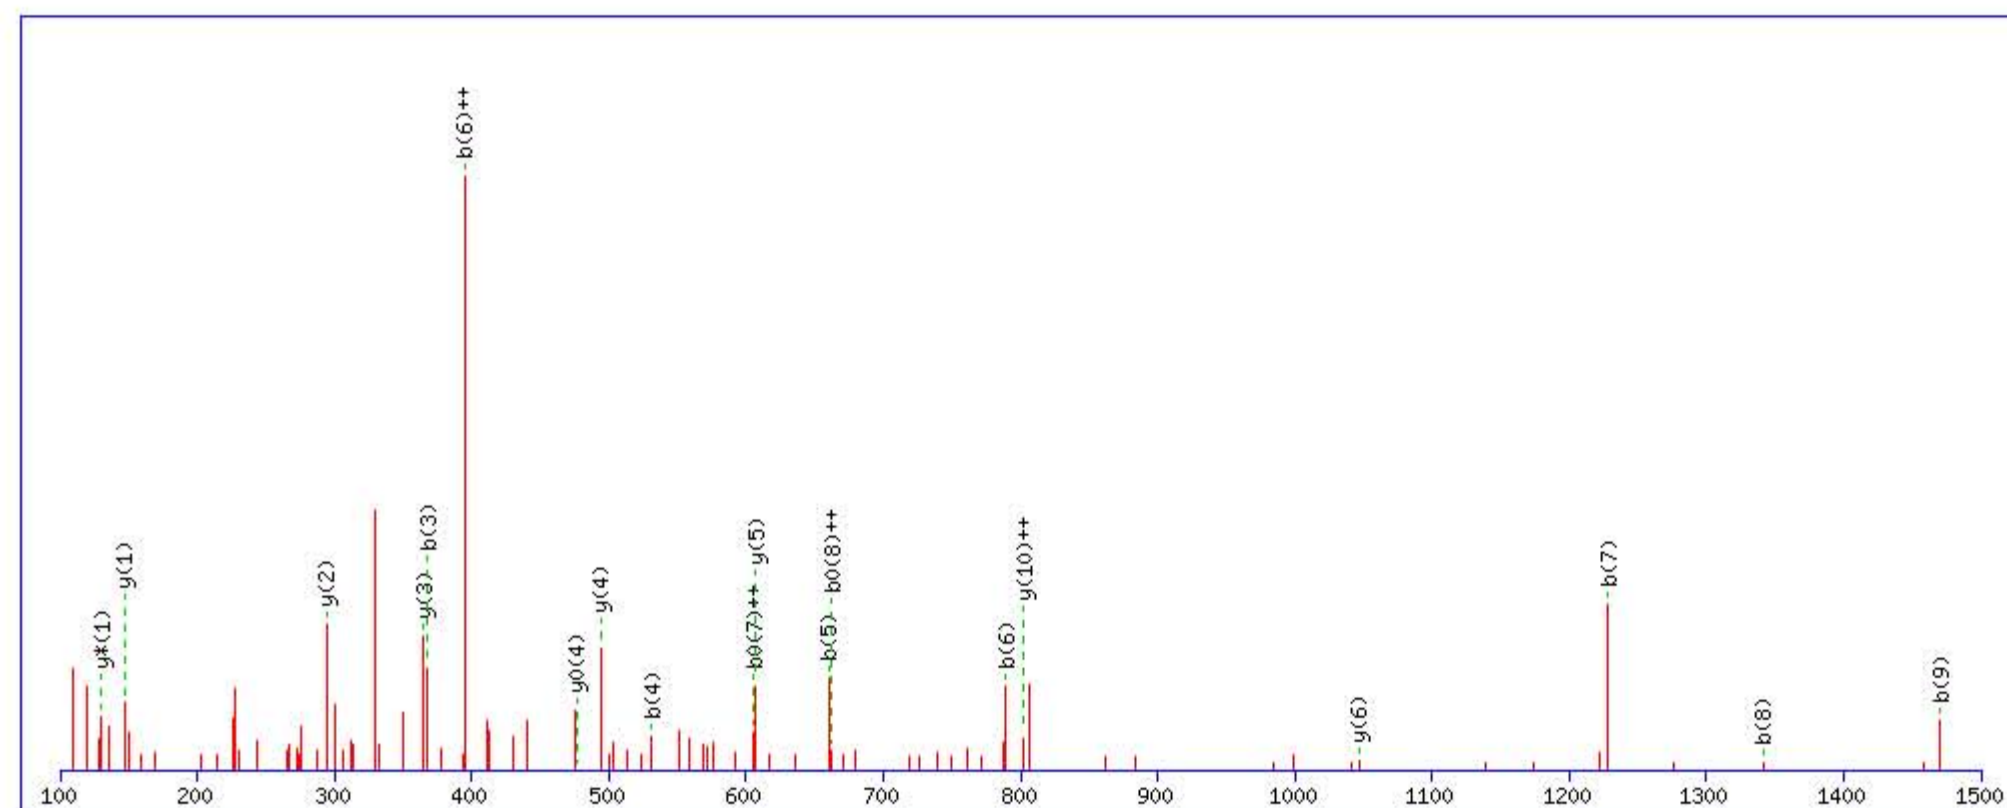

Monoisotopic mass of neutral peptide Mr(calc): 1833.860703

Fixed modifications: Carbamidomethyl (C) (apply to specified residues or termini only)

Variable modifications:

Q7 : Biotin:Thermo-21345 (Q)

Ions Score: 30 Expect: 0.018

Matches : 19/114 fragment ions using 42 most intense peaks [\(help\)](#)

| #  | b                  | b <sup>++</sup>   | b <sup>+</sup> | b <sup>+++</sup> | b <sup>0</sup> | b <sup>0++</sup>  | Seq. | y                  | y <sup>++</sup>   | y <sup>+</sup>    | y <sup>+++</sup> | y <sup>0</sup>    | y <sup>0++</sup> | #  |
|----|--------------------|-------------------|----------------|------------------|----------------|-------------------|------|--------------------|-------------------|-------------------|------------------|-------------------|------------------|----|
| 1  | 102.054955         | 51.531116         |                |                  | 84.044390      | 42.525833         | T    |                    |                   |                   |                  |                   |                  | 12 |
| 2  | 231.097548         | 116.052412        |                |                  | 213.086983     | 107.047130        | E    | 1733.820335        | 867.413805        | 1716.793786       | 858.900531       | 1715.809770       | 858.408523       | 11 |
| 3  | <b>368.156460</b>  | 184.581868        |                |                  | 350.145895     | 175.576585        | H    | 1604.777742        | <b>802.892509</b> | 1587.751193       | 794.379235       | 1586.767177       | 793.887227       | 10 |
| 4  | <b>531.219789</b>  | 266.113533        |                |                  | 513.209224     | 257.108250        | Y    | 1467.718830        | 734.363053        | 1450.692281       | 725.849779       | 1449.708265       | 725.357771       | 9  |
| 5  | <b>660.262382</b>  | 330.634829        |                |                  | 642.251817     | 321.629547        | E    | 1304.655501        | 652.831389        | 1287.628952       | 644.318114       | 1286.644936       | 643.826106       | 8  |
| 6  | <b>789.304975</b>  | <b>395.156126</b> |                |                  | 771.294410     | 386.150843        | E    | 1175.612908        | 588.310092        | 1158.586359       | 579.796817       | 1157.602343       | 579.304809       | 7  |
| 7  | <b>1228.530301</b> | 614.768789        | 1211.503752    | 606.255514       | 1210.519736    | <b>605.763506</b> | Q    | <b>1046.570315</b> | 523.788795        | 1029.543766       | 515.275521       | 1028.559750       | 514.783513       | 6  |
| 8  | <b>1341.614365</b> | 671.310820        | 1324.587816    | 662.797546       | 1323.603800    | <b>662.305538</b> | I    | <b>607.344989</b>  | 304.176132        | 590.318440        | 295.662858       | 589.334424        | 295.170850       | 5  |
| 9  | <b>1470.656958</b> | 735.832117        | 1453.630409    | 727.318842       | 1452.646393    | 726.826834        | E    | <b>494.260925</b>  | 247.634100        | 477.234376        | 239.120826       | <b>476.250360</b> | 238.628818       | 4  |
| 10 | 1541.694072        | 771.350674        | 1524.667523    | 762.837399       | 1523.683507    | 762.345391        | A    | <b>365.218332</b>  | 183.112804        | 348.191783        | 174.599530       |                   |                  | 3  |
| 11 | 1688.762486        | 844.884881        | 1671.735937    | 836.371606       | 1670.751921    | 835.879598        | F    | <b>294.181218</b>  | 147.594247        | 277.154669        | 139.080973       |                   |                  | 2  |
| 12 |                    |                   |                |                  |                |                   | K    | <b>147.112804</b>  | 74.060040         | <b>130.086255</b> | 65.546765        |                   |                  | 1  |

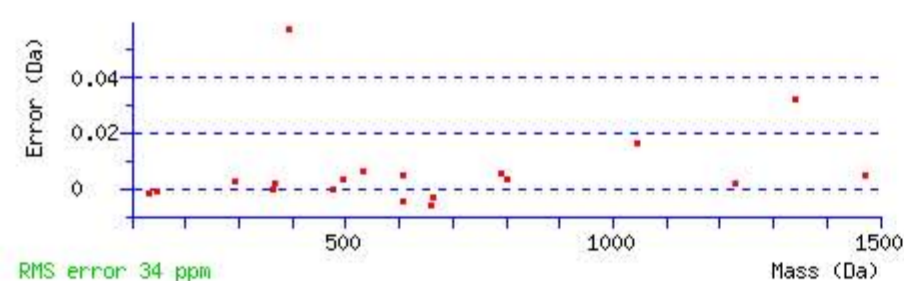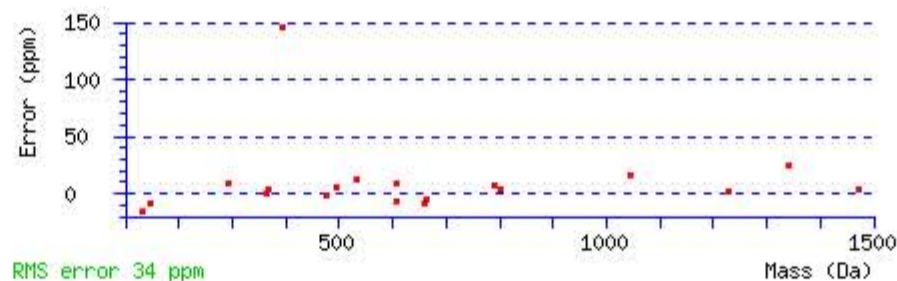

NCBI BLAST search of **TEHYEEQIEAFK**

(Parameters: blastp, nr protein database, expect=20000, no filter, PAM30)

Other BLAST [web gateways](#)

All matches to this query

| Score | Mr(calc):   | Delta     | Sequence                     |
|-------|-------------|-----------|------------------------------|
| 29.8  | 1833.860703 | -0.003201 | <a href="#">TEHYEEQIEAFK</a> |

Mascot: <http://www.matrixscience.com/>

**Mascot Search Results**

**Peptide View**

MS/MS Fragmentation of **QCVPTPCEDAEDDCGNDFCSTGR**  
 Found in **CO9\_HUMAN**, Complement component C9 OS=Homo sapiens GN=C9 PE=1 SV=2

Match to Query 42742: 3257.230272 from(1086.750700,3+) rtinseconds(1887) index(31032)  
 Title: Locus:1.1.1.3320.25 File:"2013-07-02 CLN FXIII 180 min 3rd F 3.wiff"  
 Data file C:\Program Files (x86)\Matrix Science\Mascot Daemon\mgf9 FXIII 180 min 3rd\mascot\_daemon\_merge.mgf

Click mouse within plot area to zoom in by factor of two about that point  
 Or, Plot from  to  Da   
 Label all possible matches  Label matches used for scoring

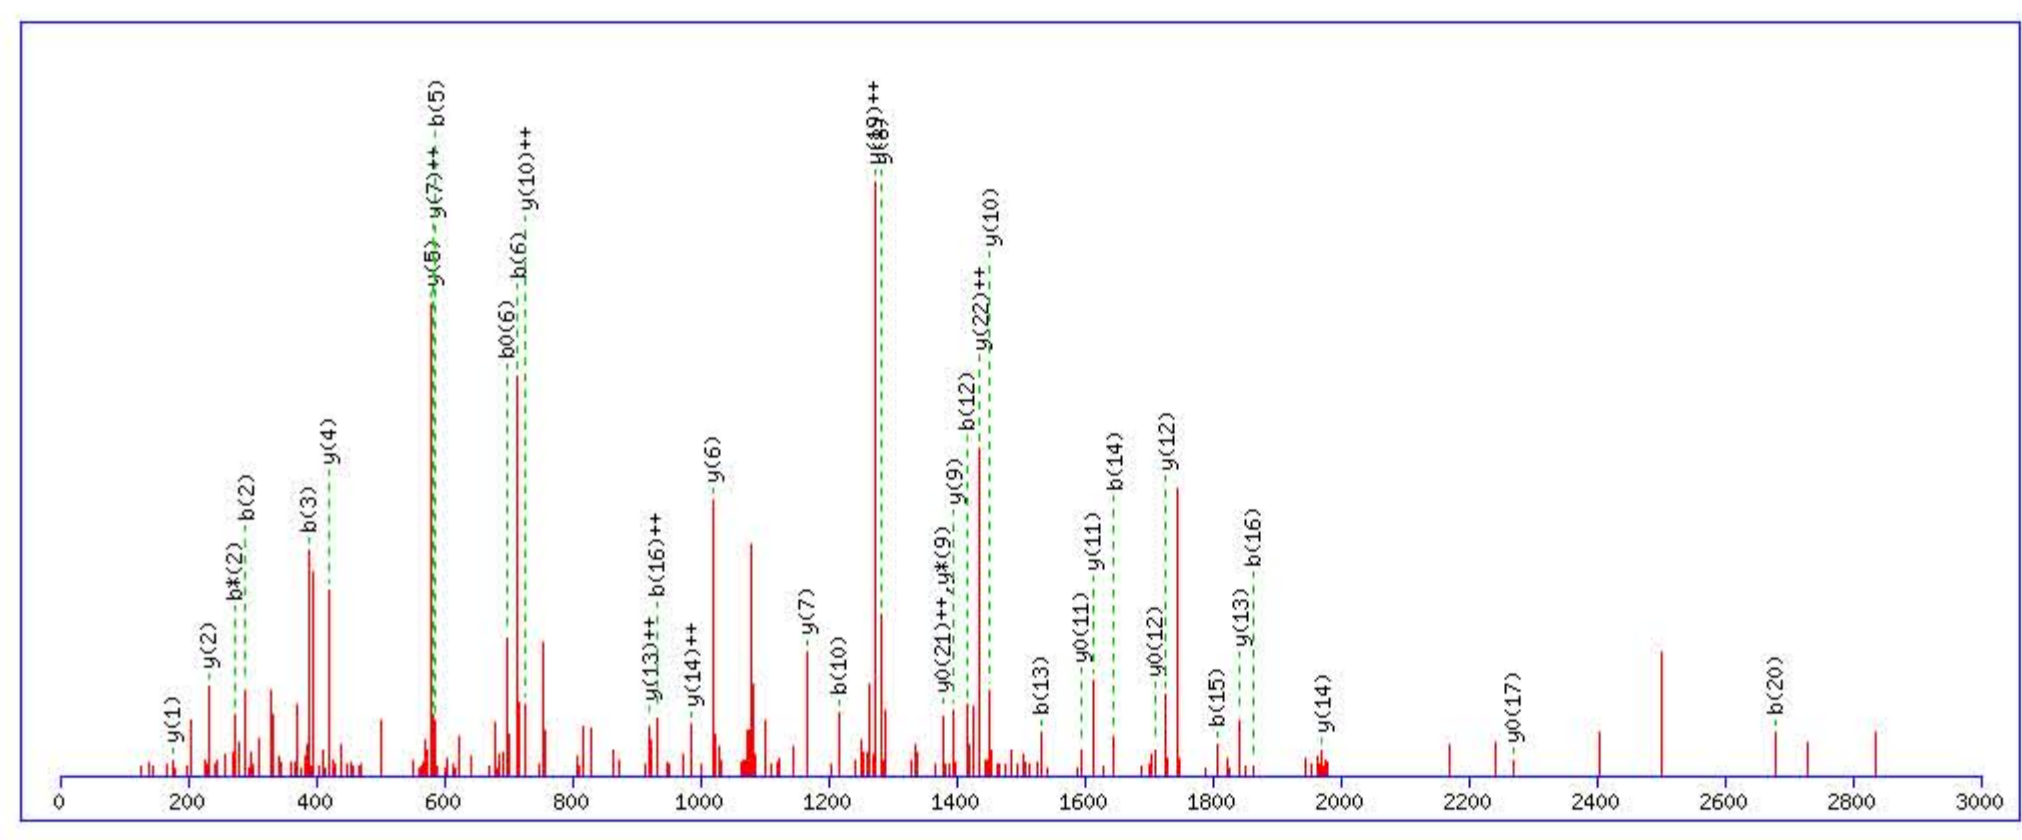

Monoisotopic mass of neutral peptide Mr(calc): 3257.246475  
 Fixed modifications: Carbamidomethyl (C) (apply to specified residues or termini only)  
 Variable modifications:  
 Q20 : Biotin:Thermo-21345 (Q)  
 Ions Score: 77 Expect: 2e-007  
 Matches : 38/276 fragment ions using 65 most intense peaks [\(help\)](#)

| #  | b                  | b <sup>++</sup>   | b <sup>+</sup>    | b <sup>+++</sup> | b <sup>0</sup>    | b <sup>0++</sup> | Seq. | y                  | y <sup>++</sup>    | y <sup>+</sup>     | y <sup>+++</sup> | y <sup>0</sup>     | y <sup>0++</sup>   | #  |
|----|--------------------|-------------------|-------------------|------------------|-------------------|------------------|------|--------------------|--------------------|--------------------|------------------|--------------------|--------------------|----|
| 1  | 129.065854         | 65.036565         | 112.039305        | 56.523291        |                   |                  | Q    |                    |                    |                    |                  |                    |                    | 25 |
| 2  | <b>289.096503</b>  | 145.051890        | <b>272.069954</b> | 136.538615       |                   |                  | C    | 3130.195136        | 1565.601206        | 3113.168587        | 1557.087931      | 3112.184571        | 1556.595923        | 24 |
| 3  | <b>388.164917</b>  | 194.586097        | 371.138368        | 186.072822       |                   |                  | V    | 2970.164487        | 1485.585881        | 2953.137938        | 1477.072607      | 2952.153922        | 1476.580599        | 23 |
| 4  | 485.217681         | 243.112479        | 468.191132        | 234.599204       |                   |                  | P    | 2871.096073        | <b>1436.051674</b> | 2854.069524        | 1427.538400      | 2853.085508        | 1427.046392        | 22 |
| 5  | <b>586.265360</b>  | 293.636318        | 569.238811        | 285.123044       | 568.254795        | 284.631036       | T    | 2774.043309        | 1387.525292        | 2757.016760        | 1379.012018      | 2756.032744        | <b>1378.520010</b> | 21 |
| 6  | <b>715.307953</b>  | 358.157615        | 698.281404        | 349.644340       | <b>697.297388</b> | 349.152332       | E    | 2672.995630        | 1337.001453        | 2655.969081        | 1328.488178      | 2654.985065        | 1327.996170        | 20 |
| 7  | 812.360717         | 406.683997        | 795.334168        | 398.170722       | 794.350152        | 397.678714       | P    | 2543.953037        | <b>1272.480156</b> | 2526.926488        | 1263.966882      | 2525.942472        | 1263.474874        | 19 |
| 8  | 972.391366         | 486.699321        | 955.364817        | 478.186047       | 954.380801        | 477.694039       | C    | 2446.900273        | 1223.953774        | 2429.873724        | 1215.440500      | 2428.889708        | 1214.948492        | 18 |
| 9  | 1101.433959        | 551.220618        | 1084.407410       | 542.707343       | 1083.423394       | 542.215335       | E    | 2286.869624        | 1143.938450        | 2269.843075        | 1135.425175      | <b>2268.859059</b> | 1134.933167        | 17 |
| 10 | <b>1216.460902</b> | 608.734089        | 1199.434353       | 600.220815       | 1198.450337       | 599.728807       | D    | 2157.827031        | 1079.417153        | 2140.800482        | 1070.903879      | 2139.816466        | 1070.411871        | 16 |
| 11 | 1287.498016        | 644.252646        | 1270.471467       | 635.739372       | 1269.487451       | 635.247364       | A    | 2042.800088        | 1021.903682        | 2025.773539        | 1013.390408      | 2024.789523        | 1012.898400        | 15 |
| 12 | <b>1416.540609</b> | 708.773943        | 1399.514060       | 700.260668       | 1398.530044       | 699.768660       | E    | <b>1971.762974</b> | <b>986.385125</b>  | 1954.736425        | 977.871851       | 1953.752409        | 977.379843         | 14 |
| 13 | <b>1531.567552</b> | 766.287414        | 1514.541003       | 757.774140       | 1513.556987       | 757.282132       | D    | <b>1842.720381</b> | <b>921.863828</b>  | 1825.693832        | 913.350554       | 1824.709816        | 912.858546         | 13 |
| 14 | <b>1646.594495</b> | 823.800886        | 1629.567946       | 815.287611       | 1628.583930       | 814.795603       | D    | <b>1727.693438</b> | 864.350357         | 1710.666889        | 855.837082       | <b>1709.682873</b> | 855.345074         | 12 |
| 15 | <b>1806.625144</b> | 903.816210        | 1789.598595       | 895.302936       | 1788.614579       | 894.810928       | C    | <b>1612.666495</b> | 806.836885         | 1595.639946        | 798.323611       | <b>1594.655930</b> | 797.831603         | 11 |
| 16 | <b>1863.646608</b> | <b>932.326942</b> | 1846.620059       | 923.813668       | 1845.636043       | 923.321660       | G    | <b>1452.635846</b> | <b>726.821561</b>  | 1435.609297        | 718.308286       | 1434.625281        | 717.816278         | 10 |
| 17 | 1977.689535        | 989.348406        | 1960.662986       | 980.835131       | 1959.678970       | 980.343123       | N    | <b>1395.614382</b> | 698.310829         | <b>1378.587833</b> | 689.797554       | 1377.603817        | 689.305546         | 9  |
| 18 | 2092.716478        | 1046.861877       | 2075.689929       | 1038.348603      | 2074.705913       | 1037.856595      | D    | <b>1281.571455</b> | 641.289365         | 1264.544906        | 632.776091       | 1263.560890        | 632.284083         | 8  |
| 19 | 2239.784892        | 1120.396084       | 2222.758343       | 1111.882809      | 2221.774327       | 1111.390802      | F    | <b>1166.544512</b> | <b>583.775894</b>  | 1149.517963        | 575.262619       | 1148.533947        | 574.770611         | 7  |
| 20 | <b>2679.010218</b> | 1340.008747       | 2661.983669       | 1331.495473      | 2660.999653       | 1331.003465      | Q    | <b>1019.476098</b> | 510.241687         | 1002.449549        | 501.728412       | 1001.465533        | 501.236404         | 6  |
| 21 | 2839.040867        | 1420.024072       | 2822.014318       | 1411.510797      | 2821.030302       | 1411.018789      | C    | <b>580.250772</b>  | 290.629024         | 563.224223         | 282.115749       | 562.240207         | 281.623741         | 5  |
| 22 | 2926.072895        | 1463.540086       | 2909.046346       | 1455.026811      | 2908.062330       | 1454.534803      | S    | <b>420.220123</b>  | 210.613699         | 403.193574         | 202.100425       | 402.209558         | 201.608417         | 4  |
| 23 | 3027.120574        | 1514.063925       | 3010.094025       | 1505.550650      | 3009.110009       | 1505.058642      | T    | 333.188095         | 167.097685         | 316.161546         | 158.584411       | 315.177530         | 158.092403         | 3  |
| 24 | 3084.142038        | 1542.574657       | 3067.115489       | 1534.061382      | 3066.131473       | 1533.569374      | G    | <b>232.140416</b>  | 116.573846         | 215.113867         | 108.060571       |                    |                    | 2  |
| 25 |                    |                   |                   |                  |                   |                  | R    | <b>175.118952</b>  | 88.063114          | 158.092403         | 79.549839        |                    |                    | 1  |

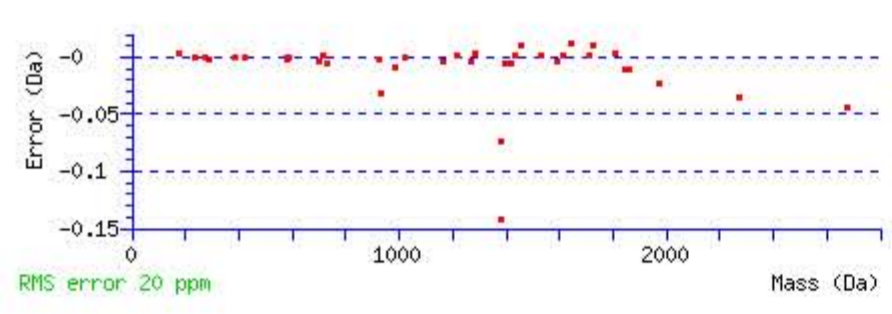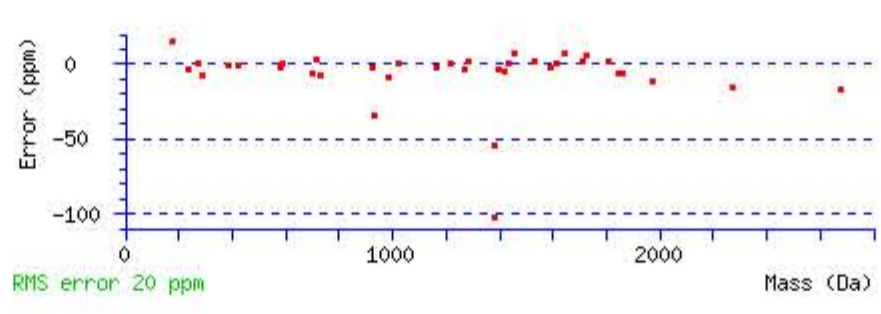

NCBI BLAST search of [QCVPTPCEDAEDDCGNDFCSTGR](#)  
 (Parameters: blastp, nr protein database, expect=20000, no filter, PAM30)  
 Other BLAST [web gateways](#)

**All matches to this query**

| Score | Mr(calc):   | Delta     | Sequence                                |
|-------|-------------|-----------|-----------------------------------------|
| 76.7  | 3257.246475 | -0.016203 | <a href="#">QCVPTPCEDAEDDCGNDFCSTGR</a> |

# MASCOT Search Results

## Peptide View

MS/MS Fragmentation of **AEQCCEETASSISLHGK**  
 Found in **CO9\_HUMAN**, Complement component C9 OS=Homo sapiens GN=C9 PE=1 SV=2

Match to Query 43540: 2216.978622 from(740.000150,3+) rtinseconds(1626) index(29598)  
 Title: Locus:1.1.1.3229.17 File:"2013-07-02 CLN FXIII 180 min 3rd F 3.wiff"  
 Data file C:\Program Files (x86)\Matrix Science\Mascot Daemon\mgf\9 FXIII 180 min 3rd\mascot\_daemon\_merge.mgf

Click mouse within plot area to zoom in by factor of two about that point  
 Or, Plot from  to  Da   
 Label all possible matches  Label matches used for scoring

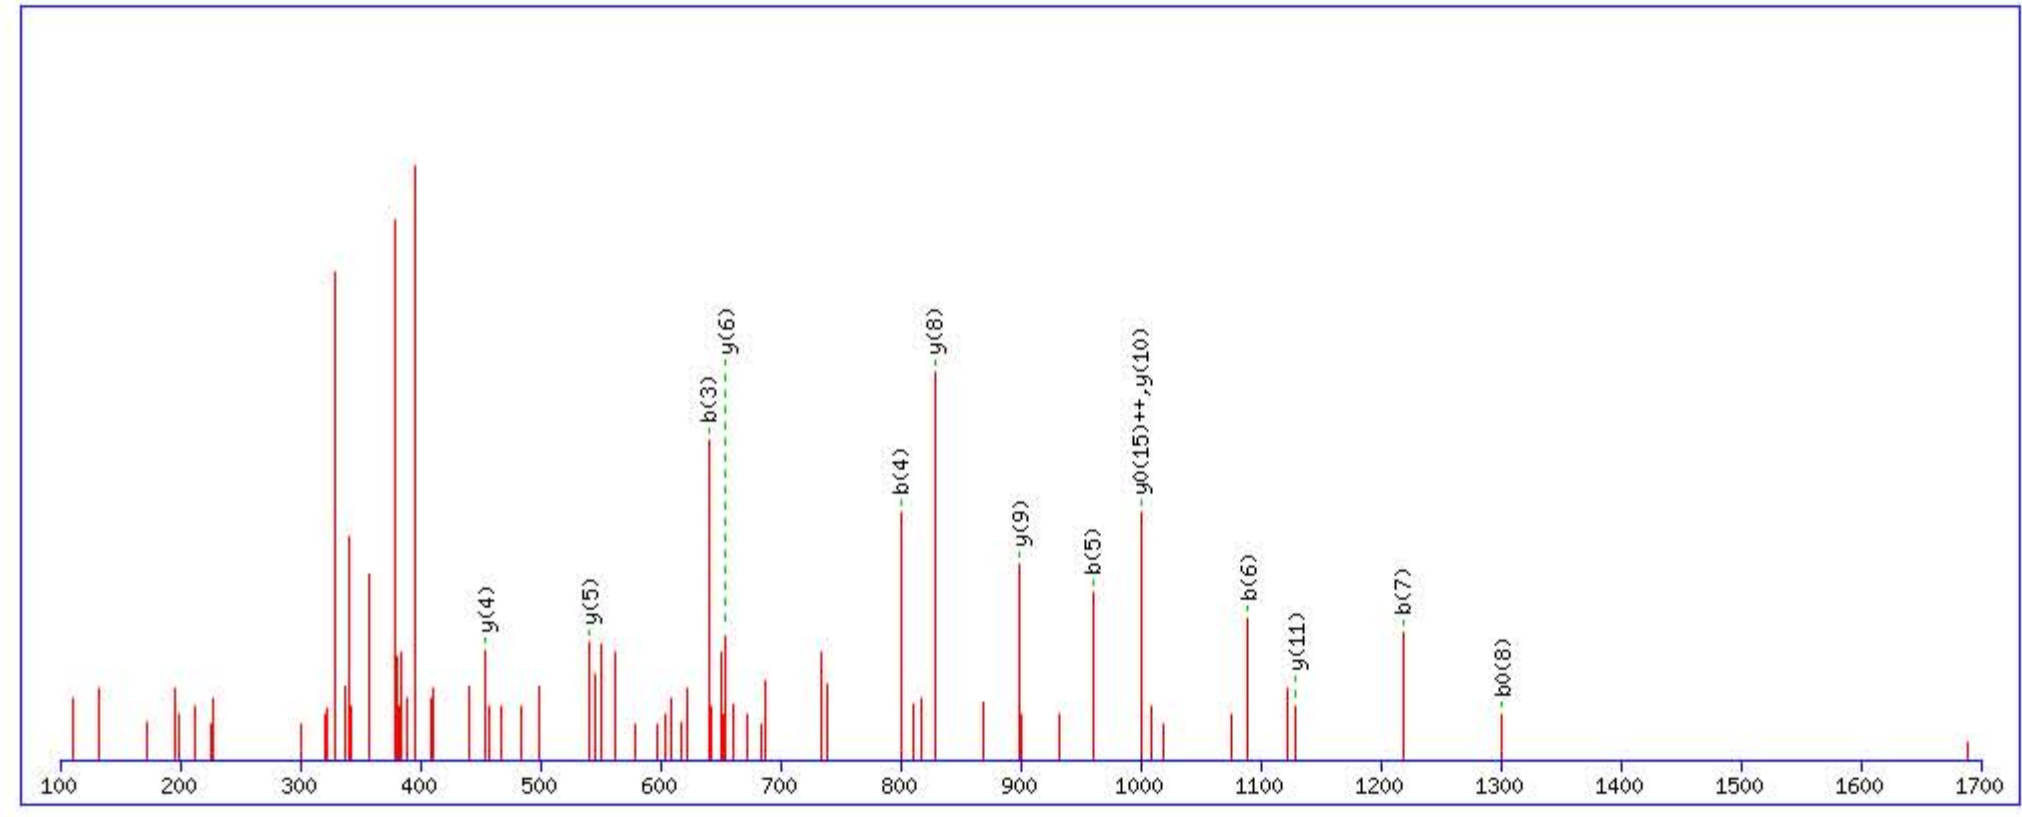

Monoisotopic mass of neutral peptide Mr(calc): 2216.986404  
 Fixed modifications: Carbamidomethyl (C) (apply to specified residues or termini only)  
 Variable modifications:  
 Q3 : Biotin:Thermo-21345 (Q)  
 Ions Score: 38 Expect: 0.0011  
 Matches : 14/178 fragment ions using 25 most intense peaks [\(help\)](#)

| #  | b                  | b <sup>++</sup> | b <sup>*</sup> | b <sup>*++</sup> | b <sup>0</sup>     | b <sup>0++</sup> | Seq. | y                  | y <sup>++</sup> | y <sup>*</sup> | y <sup>*++</sup> | y <sup>0</sup> | y <sup>0++</sup>   | #  |
|----|--------------------|-----------------|----------------|------------------|--------------------|------------------|------|--------------------|-----------------|----------------|------------------|----------------|--------------------|----|
| 1  | 72.044390          | 36.525833       |                |                  |                    |                  | A    |                    |                 |                |                  |                |                    | 17 |
| 2  | 201.086983         | 101.047130      |                |                  | 183.076418         | 92.041847        | E    | 2146.956588        | 1073.981932     | 2129.930039    | 1065.468657      | 2128.946023    | 1064.976649        | 16 |
| 3  | <b>640.312309</b>  | 320.659793      | 623.285760     | 312.146518       | 622.301744         | 311.654510       | Q    | 2017.913995        | 1009.460636     | 2000.887446    | 1000.947361      | 1999.903430    | <b>1000.455353</b> | 15 |
| 4  | <b>800.342958</b>  | 400.675117      | 783.316409     | 392.161843       | 782.332393         | 391.669835       | C    | 1578.688669        | 789.847972      | 1561.662120    | 781.334698       | 1560.678104    | 780.842690         | 14 |
| 5  | <b>960.373607</b>  | 480.690442      | 943.347058     | 472.177167       | 942.363042         | 471.685159       | C    | 1418.658020        | 709.832648      | 1401.631471    | 701.319374       | 1400.647455    | 700.827366         | 13 |
| 6  | <b>1089.416200</b> | 545.211738      | 1072.389651    | 536.698464       | 1071.405635        | 536.206456       | E    | 1258.627371        | 629.817323      | 1241.600822    | 621.304049       | 1240.616806    | 620.812041         | 12 |
| 7  | <b>1218.458793</b> | 609.733035      | 1201.432244    | 601.219760       | 1200.448228        | 600.727752       | E    | <b>1129.584778</b> | 565.296027      | 1112.558229    | 556.782753       | 1111.574213    | 556.290744         | 11 |
| 8  | 1319.506472        | 660.256874      | 1302.479923    | 651.743600       | <b>1301.495907</b> | 651.251592       | T    | <b>1000.542185</b> | 500.774731      | 983.515636     | 492.261456       | 982.531620     | 491.769448         | 10 |
| 9  | 1390.543586        | 695.775431      | 1373.517037    | 687.262157       | 1372.533021        | 686.770149       | A    | <b>899.494506</b>  | 450.250891      | 882.467957     | 441.737617       | 881.483941     | 441.245609         | 9  |
| 10 | 1477.575614        | 739.291445      | 1460.549065    | 730.778171       | 1459.565049        | 730.286163       | S    | <b>828.457392</b>  | 414.732334      | 811.430843     | 406.219060       | 810.446827     | 405.727052         | 8  |
| 11 | 1564.607642        | 782.807459      | 1547.581093    | 774.294185       | 1546.597077        | 773.802177       | S    | 741.425364         | 371.216320      | 724.398815     | 362.703045       | 723.414799     | 362.211037         | 7  |
| 12 | 1677.691706        | 839.349491      | 1660.665157    | 830.836217       | 1659.681141        | 830.344209       | I    | <b>654.393336</b>  | 327.700306      | 637.366787     | 319.187031       | 636.382771     | 318.695023         | 6  |
| 13 | 1764.723734        | 882.865505      | 1747.697185    | 874.352231       | 1746.713169        | 873.860223       | S    | <b>541.309272</b>  | 271.158274      | 524.282723     | 262.644999       | 523.298707     | 262.152991         | 5  |
| 14 | 1877.807798        | 939.407537      | 1860.781249    | 930.894263       | 1859.797233        | 930.402255       | L    | <b>454.277244</b>  | 227.642260      | 437.250695     | 219.128985       |                |                    | 4  |
| 15 | 2014.866710        | 1007.936993     | 1997.840161    | 999.423719       | 1996.856145        | 998.931711       | H    | 341.193180         | 171.100228      | 324.166631     | 162.586953       |                |                    | 3  |
| 16 | 2071.888174        | 1036.447725     | 2054.861625    | 1027.934450      | 2053.877609        | 1027.442442      | G    | 204.134268         | 102.570772      | 187.107719     | 94.057497        |                |                    | 2  |
| 17 |                    |                 |                |                  |                    |                  | K    | 147.112804         | 74.060040       | 130.086255     | 65.546765        |                |                    | 1  |

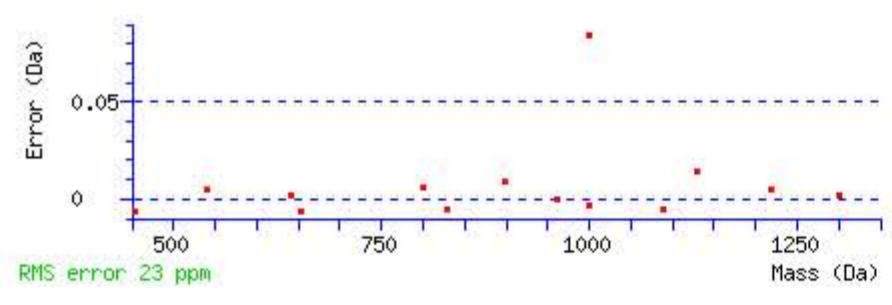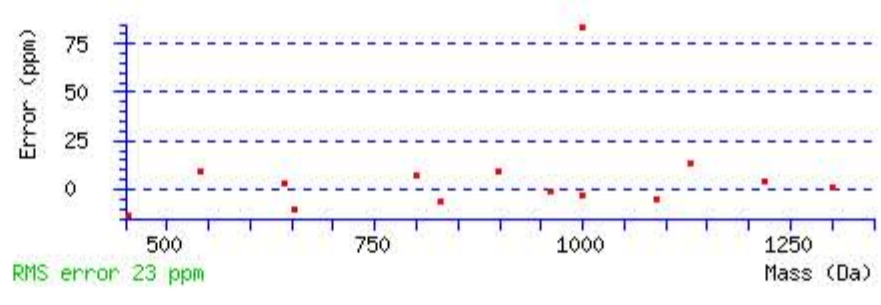

NCBI BLAST search of **AEQCCEETASSISLHGK**  
 (Parameters: blastp, nr protein database, expect=20000, no filter, PAM30)  
 Other BLAST [web gateways](#)

### All matches to this query

| Score | Mr(calc):   | Delta     | Sequence                          |
|-------|-------------|-----------|-----------------------------------|
| 38.1  | 2216.986404 | -0.007782 | <a href="#">AEQCCEETASSISLHGK</a> |

# MASCOT Search Results

## Peptide View

MS/MS Fragmentation of **VGSQYR**

Found in **CFAB\_HUMAN**, Complement factor B OS=Homo sapiens GN=CFB PE=1 SV=2

Match to Query 12096: 1019.517328 from(510.765940,2+) rtinseconds(1437) index(42473)

Title: Locus:1.1.1.3213.8 File:"2013-07-02 CLN FXIII 180 min 3rd F 4.wiff"

Data file C:\Program Files (x86)\Matrix Science\Mascot Daemon\mgf9 FXIII 180 min 3rd\mascot\_daemon\_merge.mgf

Click mouse within plot area to zoom in by factor of two about that point

Or, Plot from  to  Da

Label all possible matches  Label matches used for scoring

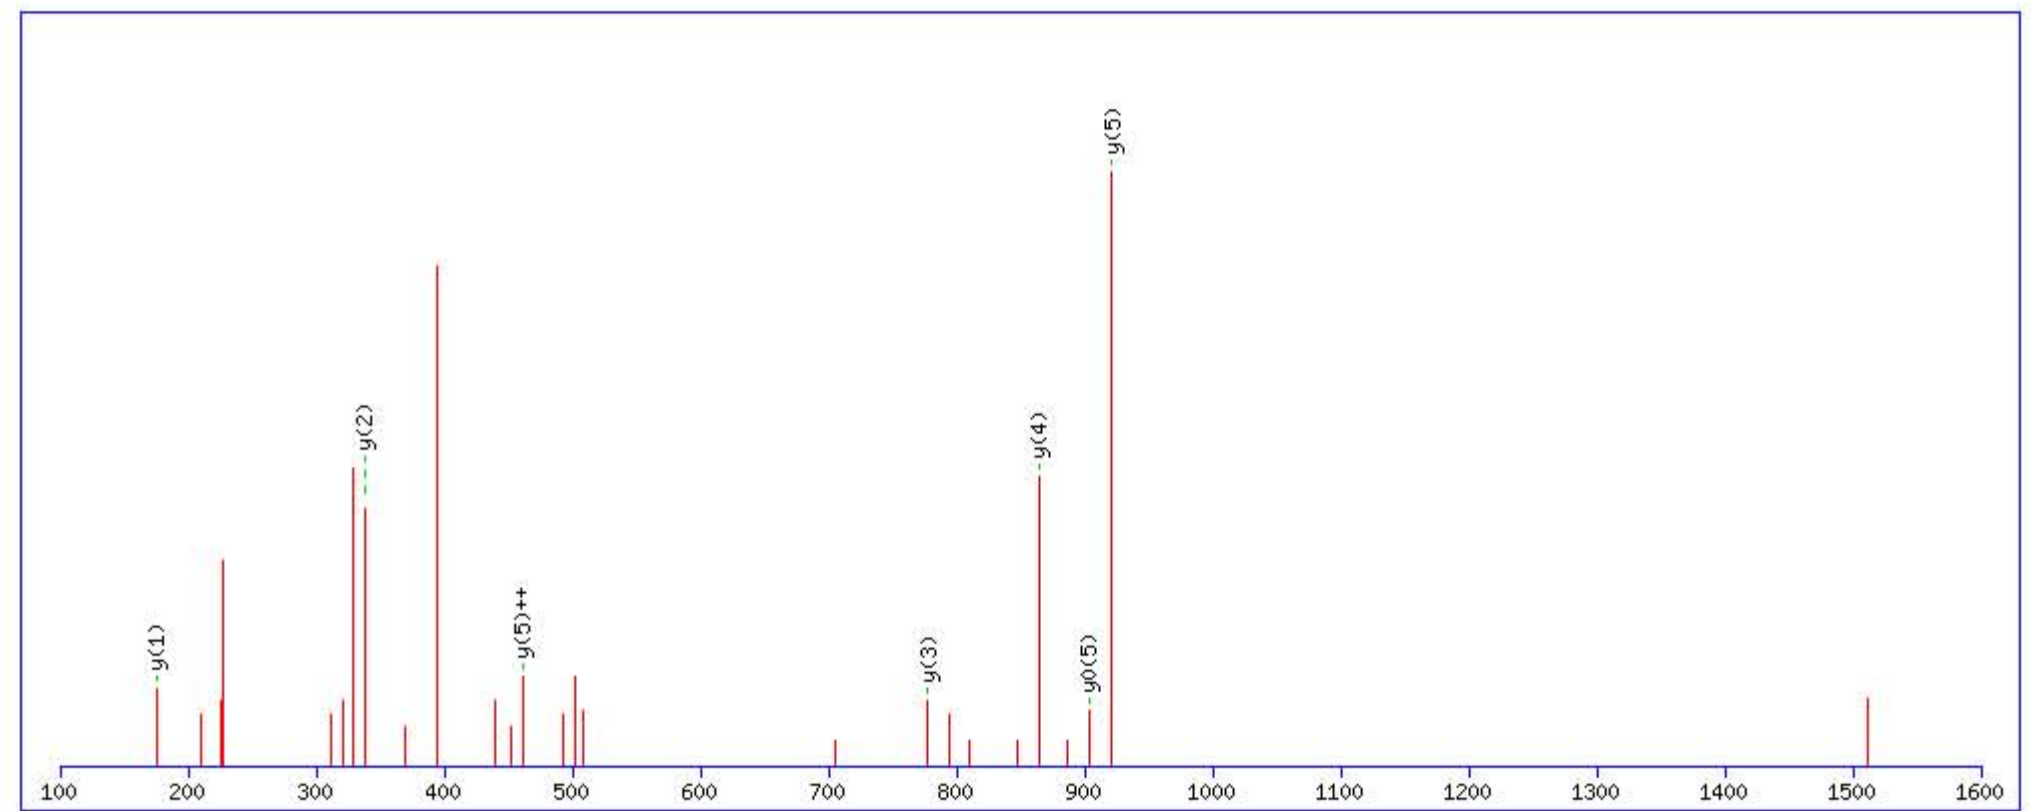

Monoisotopic mass of neutral peptide Mr(calc): 1019.522232

Fixed modifications: Carbamidomethyl (C) (apply to specified residues or termini only)

Variable modifications:

Q4 : Biotin:Thermo-21345 (Q)

Ions Score: 34 Expect: 0.0051

Matches : 7/44 fragment ions using 13 most intense peaks [\(help\)](#)

| # | b          | b <sup>++</sup> | b <sup>*</sup> | b <sup>+++</sup> | b <sup>0</sup> | b <sup>0++</sup> | Seq. | y          | y <sup>++</sup> | y <sup>*</sup> | y <sup>+++</sup> | y <sup>0</sup> | y <sup>0++</sup> | # |
|---|------------|-----------------|----------------|------------------|----------------|------------------|------|------------|-----------------|----------------|------------------|----------------|------------------|---|
| 1 | 100.075690 | 50.541483       |                |                  |                |                  | V    |            |                 |                |                  |                |                  | 6 |
| 2 | 157.097154 | 79.052215       |                |                  |                |                  | G    | 921.461099 | 461.234188      | 904.434550     | 452.720913       | 903.450534     | 452.228905       | 5 |
| 3 | 244.129182 | 122.568229      |                |                  | 226.118617     | 113.562946       | S    | 864.439635 | 432.723456      | 847.413086     | 424.210181       | 846.429070     | 423.718173       | 4 |
| 4 | 683.354508 | 342.180892      | 666.327959     | 333.667618       | 665.343943     | 333.175610       | Q    | 777.407607 | 389.207442      | 760.381058     | 380.694167       |                |                  | 3 |
| 5 | 846.417837 | 423.712557      | 829.391288     | 415.199282       | 828.407272     | 414.707274       | Y    | 338.182281 | 169.594778      | 321.155732     | 161.081504       |                |                  | 2 |
| 6 |            |                 |                |                  |                |                  | R    | 175.118952 | 88.063114       | 158.092403     | 79.549839        |                |                  | 1 |

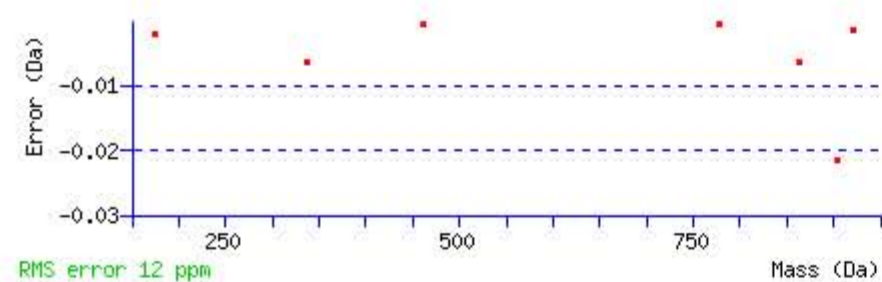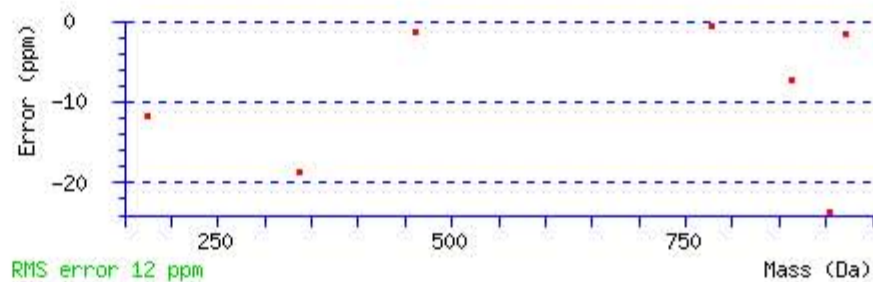

NCBI BLAST search of **VGSQYR**

(Parameters: blastp, nr protein database, expect=20000, no filter, PAM30)

Other BLAST [web gateways](#)

## All matches to this query

| Score | Mr(calc):   | Delta     | Sequence                    |
|-------|-------------|-----------|-----------------------------|
| 34.0  | 1019.522232 | -0.004904 | <a href="#">VGSQYR</a>      |
| 9.0   | 1019.510818 | 0.006510  | <a href="#">RSSVSSGGAGR</a> |
| 5.1   | 1019.512146 | 0.005182  | <a href="#">RSRGHHDR</a>    |
| 4.8   | 1019.526047 | -0.008719 | <a href="#">SRERGPYR</a>    |
| 0.9   | 1019.526077 | -0.008749 | <a href="#">VPQAGGQHAR</a>  |
| 0.8   | 1019.529419 | -0.012091 | <a href="#">RGEISRMR</a>    |
| 0.2   | 1019.506973 | 0.010355  | <a href="#">VMDVINSAR</a>   |
| 0.2   | 1019.525589 | -0.008261 | <a href="#">VMMEVQKR</a>    |
| 0.2   | 1019.525604 | -0.008276 | <a href="#">VQLTMCLR</a>    |
| 0.2   | 1019.518204 | -0.000876 | <a href="#">VRSCETLR</a>    |

# MASCOT SCIENCE Mascot Search Results

## Peptide View

MS/MS Fragmentation of **DAQYAPGYDK**

Found in **CFAB\_HUMAN**, Complement factor B OS=Homo sapiens GN=CFB PE=1 SV=2

Match to Query 25535: 1437.662568 from(719.838560,2+) rtinseconds(1663) index(58798)

Title: Locus:1.1.1.1490.12 File:"2013-07-02 CLN FXIII 180 min 3rd FT.wiff"

Data file C:\Program Files (x86)\Matrix Science\Mascot Daemon\mgf\9 FXIII 180 min 3rd\mascot\_daemon\_merge.mgf

Click mouse within plot area to zoom in by factor of two about that point

Or, Plot from  to  Da

Label all possible matches  Label matches used for scoring

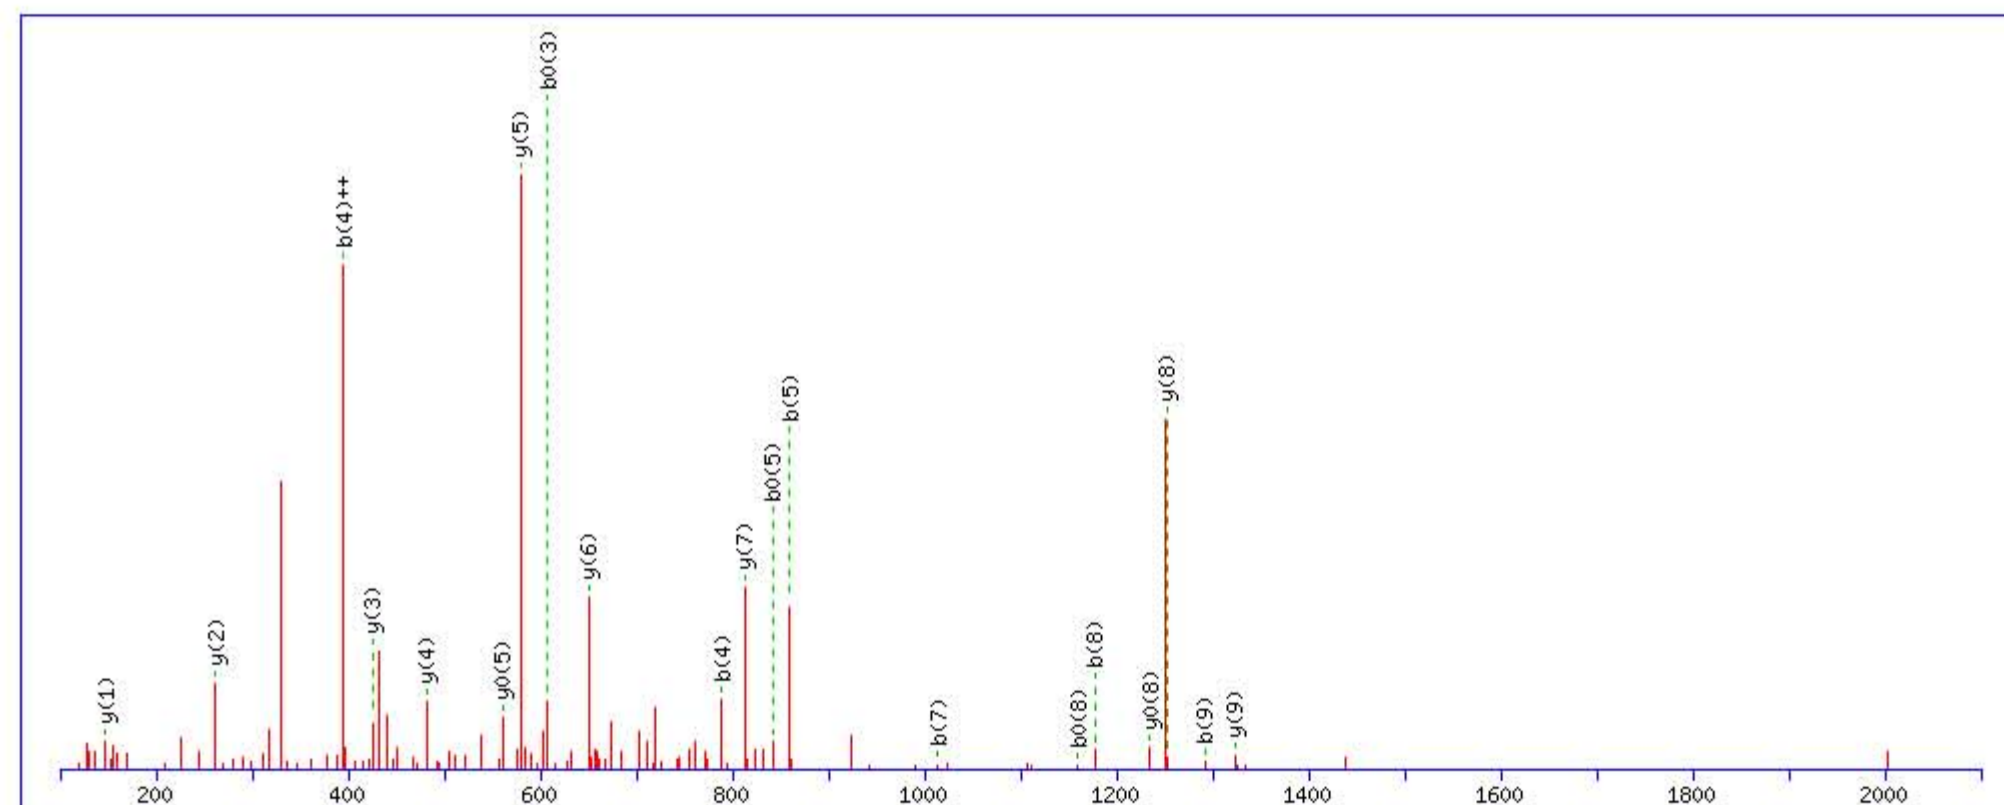

Monoisotopic mass of neutral peptide Mr(calc): 1437.659836

Fixed modifications: Carbamidomethyl (C) (apply to specified residues or termini only)

Variable modifications:

Q3 : Biotin:Thermo-21345 (Q)

Ions Score: 47 Expect: 0.00022

Matches : 20/102 fragment ions using 48 most intense peaks [\(help\)](#)

| #  | b           | b <sup>++</sup> | b <sup>+</sup> | b <sup>+++</sup> | b <sup>0</sup> | b <sup>0++</sup> | Seq. | y           | y <sup>++</sup> | y <sup>+</sup> | y <sup>+++</sup> | y <sup>0</sup> | y <sup>0++</sup> | #  |
|----|-------------|-----------------|----------------|------------------|----------------|------------------|------|-------------|-----------------|----------------|------------------|----------------|------------------|----|
| 1  | 116.034219  | 58.520748       |                |                  | 98.023654      | 49.515465        | D    |             |                 |                |                  |                |                  | 10 |
| 2  | 187.071333  | 94.039304       |                |                  | 169.060768     | 85.034022        | A    | 1323.640187 | 662.323732      | 1306.613638    | 653.810457       | 1305.629622    | 653.318449       | 9  |
| 3  | 626.296659  | 313.651968      | 609.270110     | 305.138693       | 608.286094     | 304.646685       | Q    | 1252.603073 | 626.805175      | 1235.576524    | 618.291900       | 1234.592508    | 617.799892       | 8  |
| 4  | 789.359988  | 395.183632      | 772.333439     | 386.670358       | 771.349423     | 386.178350       | Y    | 813.377747  | 407.192512      | 796.351198     | 398.679237       | 795.367182     | 398.187229       | 7  |
| 5  | 860.397102  | 430.702189      | 843.370553     | 422.188915       | 842.386537     | 421.696907       | A    | 650.314418  | 325.660847      | 633.287869     | 317.147573       | 632.303853     | 316.655565       | 6  |
| 6  | 957.449866  | 479.228571      | 940.423317     | 470.715297       | 939.439301     | 470.223289       | P    | 579.277304  | 290.142290      | 562.250755     | 281.629016       | 561.266739     | 281.137008       | 5  |
| 7  | 1014.471330 | 507.739303      | 997.444781     | 499.226029       | 996.460765     | 498.734021       | G    | 482.224540  | 241.615908      | 465.197991     | 233.102634       | 464.213975     | 232.610626       | 4  |
| 8  | 1177.534659 | 589.270968      | 1160.508110    | 580.757693       | 1159.524094    | 580.265685       | Y    | 425.203076  | 213.105176      | 408.176527     | 204.591902       | 407.192511     | 204.099894       | 3  |
| 9  | 1292.561602 | 646.784439      | 1275.535053    | 638.271165       | 1274.551037    | 637.779157       | D    | 262.139747  | 131.573512      | 245.113198     | 123.060237       | 244.129182     | 122.568229       | 2  |
| 10 |             |                 |                |                  |                |                  | K    | 147.112804  | 74.060040       | 130.086255     | 65.546765        |                |                  | 1  |

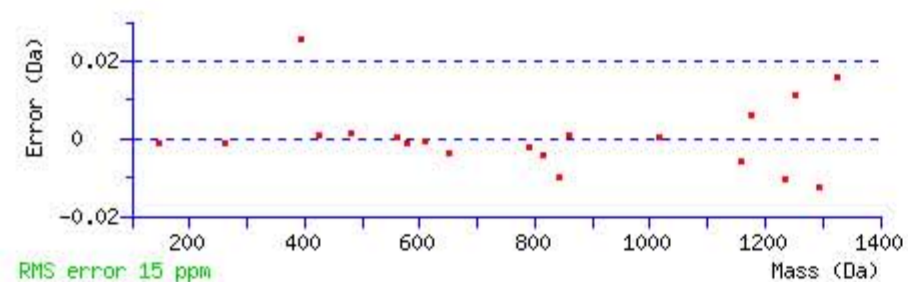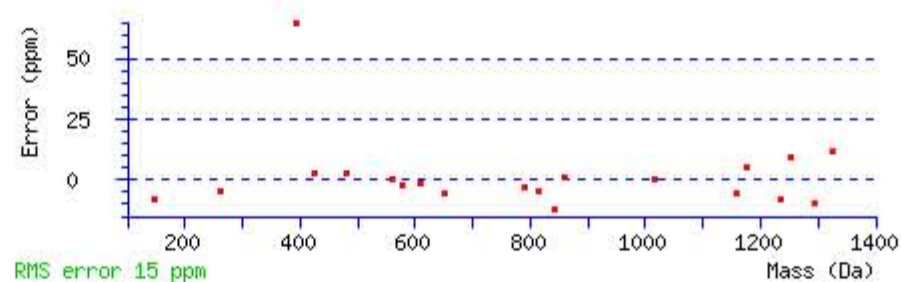

NCBI BLAST search of **DAQYAPGYDK**

(Parameters: blastp, nr protein database, expect=20000, no filter, PAM30)

Other BLAST [web gateways](#)

## All matches to this query

| Score | Mr(calc):   | Delta     | Sequence                       |
|-------|-------------|-----------|--------------------------------|
| 46.7  | 1437.659836 | 0.002732  | <a href="#">DAQYAPGYDK</a>     |
| 19.6  | 1437.647064 | 0.015504  | <a href="#">ASSDLSIASSEEDK</a> |
| 10.4  | 1437.659164 | 0.003404  | <a href="#">LAEAEQMALMGSR</a>  |
| 4.9   | 1437.680969 | -0.018401 | <a href="#">EGFLKGEDGEMVK</a>  |
| 0.6   | 1437.644577 | 0.017991  | <a href="#">EDLGAGNLEDFMK</a>  |
| 0.6   | 1437.645264 | 0.017304  | <a href="#">SDASCMSQRRPK</a>   |

# MASCOT Search Results

## Peptide View

MS/MS Fragmentation of **EELLPAQDIK**

Found in **CFAB\_HUMAN**, Complement factor B OS=Homo sapiens GN=CFB PE=1 SV=2

Match to Query 26317: 1465.793588 from(733.904070,2+) rtinseconds(2156) index(61413)

Title: Locus:1.1.1.1662.11 File:"2013-07-02 CLN FXIII 180 min 3rd FT.wiff"

Data file C:\Program Files (x86)\Matrix Science\Mascot Daemon\mgf9 FXIII 180 min 3rd\mascot\_daemon\_merge.mgf

Click mouse within plot area to zoom in by factor of two about that point

Or, Plot from  to  Da

Label all possible matches  Label matches used for scoring

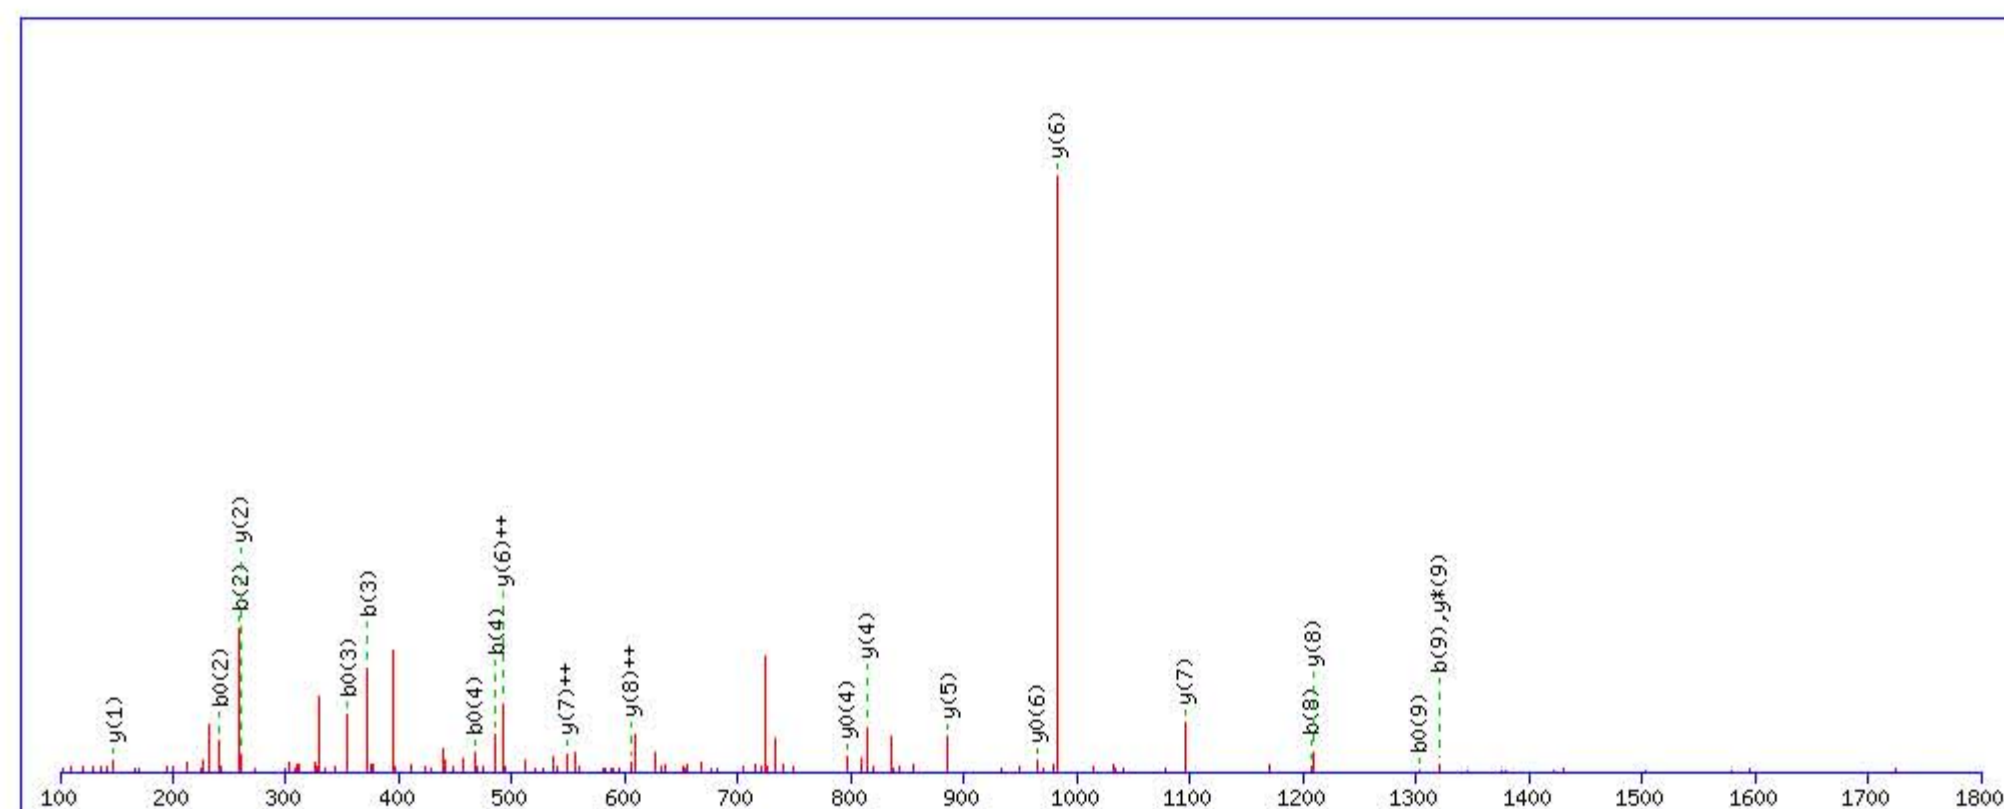

Monoisotopic mass of neutral peptide Mr(calc): 1465.785019

Fixed modifications: Carbamidomethyl (C) (apply to specified residues or termini only)

Variable modifications:

Q7 : Biotin:Thermo-21345 (Q)

Ions Score: 31 Expect: 0.016

Matches : 22/92 fragment ions using 49 most intense peaks [\(help\)](#)

| #  | b                  | b <sup>++</sup> | b <sup>*</sup> | b <sup>*++</sup> | b <sup>0</sup>     | b <sup>0++</sup> | Seq. | y                  | y <sup>++</sup>   | y <sup>*</sup>     | y <sup>*++</sup> | y <sup>0</sup>    | y <sup>0++</sup> | #  |
|----|--------------------|-----------------|----------------|------------------|--------------------|------------------|------|--------------------|-------------------|--------------------|------------------|-------------------|------------------|----|
| 1  | 130.049869         | 65.528572       |                |                  | 112.039304         | 56.523290        | E    |                    |                   |                    |                  |                   |                  | 10 |
| 2  | <b>259.092462</b>  | 130.049869      |                |                  | <b>241.081897</b>  | 121.044587       | E    | 1337.749736        | 669.378506        | <b>1320.723187</b> | 660.865232       | 1319.739171       | 660.373223       | 9  |
| 3  | <b>372.176526</b>  | 186.591901      |                |                  | <b>354.165961</b>  | 177.586619       | L    | <b>1208.707143</b> | <b>604.857210</b> | 1191.680594        | 596.343935       | 1190.696578       | 595.851927       | 8  |
| 4  | <b>485.260590</b>  | 243.133933      |                |                  | <b>467.250025</b>  | 234.128651       | L    | <b>1095.623079</b> | <b>548.315178</b> | 1078.596530        | 539.801903       | 1077.612514       | 539.309895       | 7  |
| 5  | 582.313354         | 291.660315      |                |                  | 564.302789         | 282.655033       | P    | <b>982.539015</b>  | <b>491.773146</b> | 965.512466         | 483.259871       | <b>964.528450</b> | 482.767863       | 6  |
| 6  | 653.350468         | 327.178872      |                |                  | 635.339903         | 318.173590       | A    | <b>885.486251</b>  | 443.246764        | 868.459702         | 434.733489       | 867.475686        | 434.241481       | 5  |
| 7  | 1092.575794        | 546.791535      | 1075.549245    | 538.278261       | 1074.565229        | 537.786253       | Q    | <b>814.449137</b>  | 407.728207        | 797.422588         | 399.214932       | <b>796.438572</b> | 398.722924       | 4  |
| 8  | <b>1207.602737</b> | 604.305007      | 1190.576188    | 595.791732       | 1189.592172        | 595.299724       | D    | 375.223811         | 188.115543        | 358.197262         | 179.602269       | 357.213246        | 179.110261       | 3  |
| 9  | <b>1320.686801</b> | 660.847039      | 1303.660252    | 652.333764       | <b>1302.676236</b> | 651.841756       | I    | <b>260.196868</b>  | 130.602072        | 243.170319         | 122.088797       |                   |                  | 2  |
| 10 |                    |                 |                |                  |                    |                  | K    | <b>147.112804</b>  | 74.060040         | 130.086255         | 65.546765        |                   |                  | 1  |

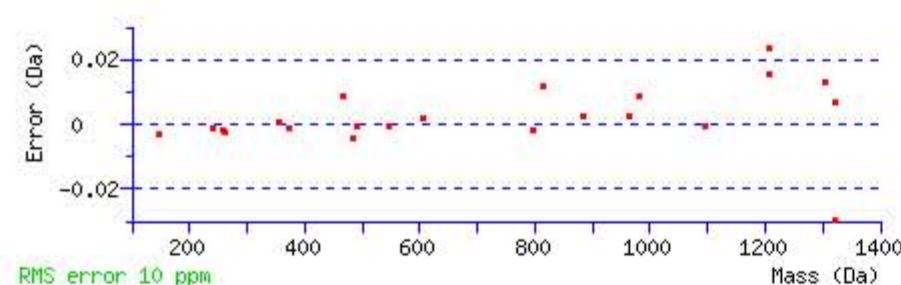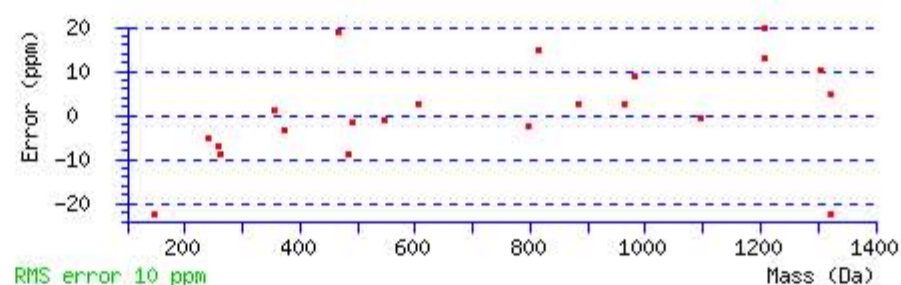

NCBI BLAST search of **EELLPAQDIK**

(Parameters: blastp, nr protein database, expect=20000, no filter, PAM30)

Other BLAST [web gateways](#)

## All matches to this query

| Score | Mr(calc):   | Delta     | Sequence                      |
|-------|-------------|-----------|-------------------------------|
| 30.9  | 1465.785019 | 0.008569  | <a href="#">EELLPAQDIK</a>    |
| 12.4  | 1465.813995 | -0.020407 | <a href="#">SQLKHEILELEK</a>  |
| 4.5   | 1465.788849 | 0.004739  | <a href="#">SKHLQEQLNELK</a>  |
| 0.5   | 1465.794235 | -0.000647 | <a href="#">KWGIGYHLSLHR</a>  |
| 0.0   | 1465.788849 | 0.004739  | <a href="#">KQVEHQLEEAKK</a>  |
| 0.0   | 1465.800125 | -0.006537 | <a href="#">LAQDGAHVVSRRK</a> |
| 0.0   | 1465.789734 | 0.003854  | <a href="#">TAAALGMHQKK</a>   |

Mascot: <http://www.matrixscience.com/>



# MASCOT SCIENCE Mascot Search Results

## Peptide View

MS/MS Fragmentation of **LPPTTTCQQQK**

Found in **CFAB\_HUMAN**, Complement factor B OS=Homo sapiens GN=CFB PE=1 SV=2

Match to Query 31048: 1611.811032 from(538.277620,3+) rtinseconds(1504) index(1979)

Title: Locus:1.1.1.3043.8 File:"2013-07-02 CLN FXIII 180 min 3rd F 1.wiff"

Data file C:\Program Files (x86)\Matrix Science\Mascot Daemon\mgf\9 FXIII 180 min 3rd\mascot\_daemon\_merge.mgf

Click mouse within plot area to zoom in by factor of two about that point

Or, Plot from  to  Da

Label all possible matches  Label matches used for scoring

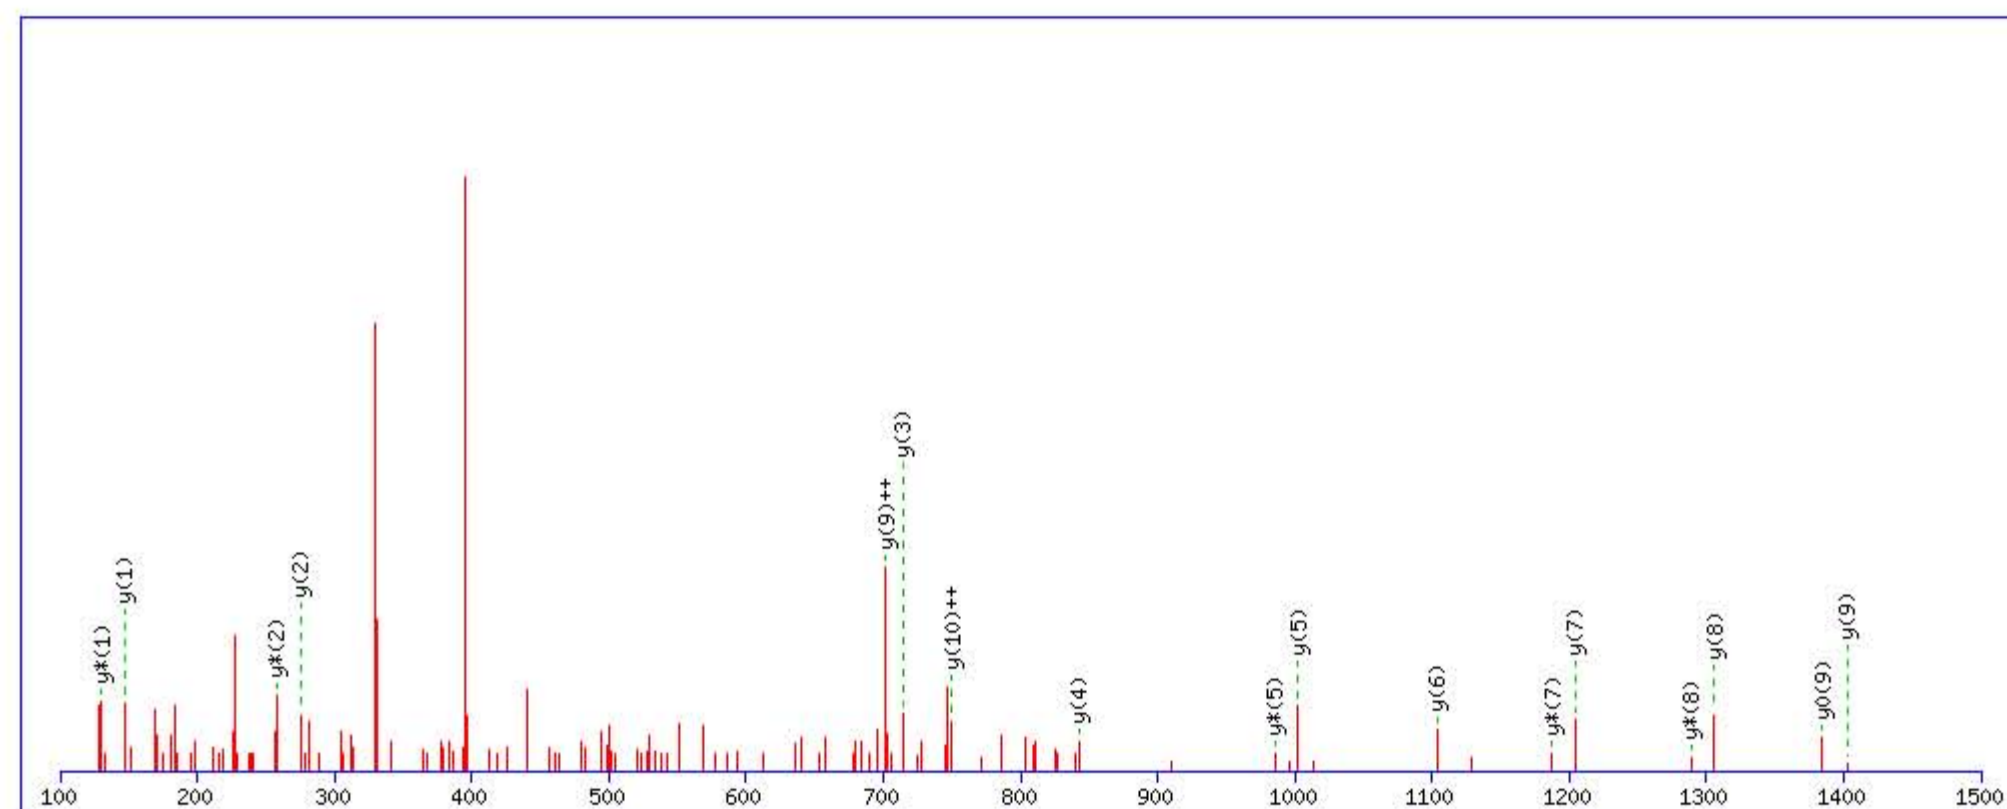

Monoisotopic mass of neutral peptide Mr(calc): 1611.811295

Fixed modifications: Carbamidomethyl (C) (apply to specified residues or termini only)

Variable modifications:

Q9 : Biotin:Thermo-21345 (Q)

Ions Score: 48 Expect: 0.00012

Matches : 17/90 fragment ions using 35 most intense peaks [\(help\)](#)

| #  | b           | b <sup>++</sup> | b <sup>*</sup> | b <sup>*++</sup> | b <sup>0</sup> | b <sup>0++</sup> | Seq. | y           | y <sup>++</sup> | y <sup>*</sup> | y <sup>*++</sup> | y <sup>0</sup> | y <sup>0++</sup> | #  |
|----|-------------|-----------------|----------------|------------------|----------------|------------------|------|-------------|-----------------|----------------|------------------|----------------|------------------|----|
| 1  | 114.091340  | 57.549308       |                |                  |                |                  | L    |             |                 |                |                  |                |                  | 11 |
| 2  | 211.144104  | 106.075690      |                |                  |                |                  | P    | 1499.734500 | 750.370888      | 1482.707951    | 741.857614       | 1481.723935    | 741.365606       | 10 |
| 3  | 308.196868  | 154.602072      |                |                  |                |                  | P    | 1402.681736 | 701.844506      | 1385.655187    | 693.331232       | 1384.671171    | 692.839224       | 9  |
| 4  | 409.244547  | 205.125911      |                |                  | 391.233982     | 196.120629       | T    | 1305.628972 | 653.318124      | 1288.602423    | 644.804850       | 1287.618407    | 644.312842       | 8  |
| 5  | 510.292226  | 255.649751      |                |                  | 492.281661     | 246.644468       | T    | 1204.581293 | 602.794285      | 1187.554744    | 594.281010       | 1186.570728    | 593.789002       | 7  |
| 6  | 611.339905  | 306.173591      |                |                  | 593.329340     | 297.168308       | T    | 1103.533614 | 552.270445      | 1086.507065    | 543.757171       | 1085.523049    | 543.265163       | 6  |
| 7  | 771.370554  | 386.188915      |                |                  | 753.359989     | 377.183633       | C    | 1002.485935 | 501.746606      | 985.459386     | 493.233331       |                |                  | 5  |
| 8  | 899.429132  | 450.218204      | 882.402583     | 441.704930       | 881.418567     | 441.212922       | Q    | 842.455286  | 421.731281      | 825.428737     | 413.218007       |                |                  | 4  |
| 9  | 1338.654458 | 669.830867      | 1321.627909    | 661.317593       | 1320.643893    | 660.825585       | Q    | 714.396708  | 357.701992      | 697.370159     | 349.188718       |                |                  | 3  |
| 10 | 1466.713036 | 733.860156      | 1449.686487    | 725.346882       | 1448.702471    | 724.854874       | Q    | 275.171382  | 138.089329      | 258.144833     | 129.576055       |                |                  | 2  |
| 11 |             |                 |                |                  |                |                  | K    | 147.112804  | 74.060040       | 130.086255     | 65.546765        |                |                  | 1  |

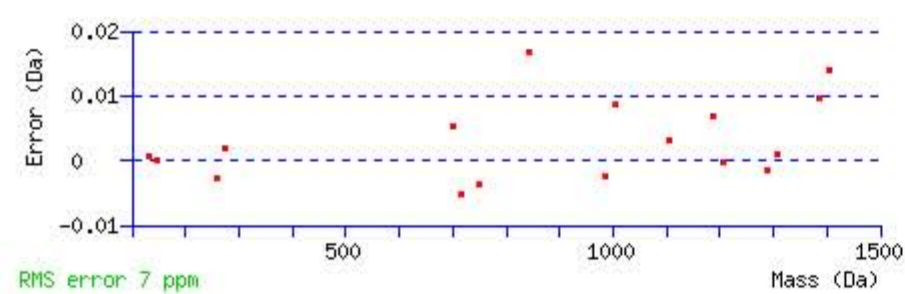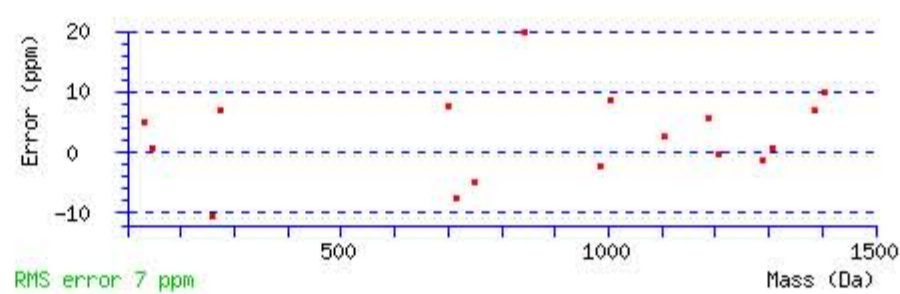

NCBI BLAST search of **LPPTTTCQQQK**

(Parameters: blastp, nr protein database, expect=20000, no filter, PAM30)

Other BLAST [web gateways](#)

All matches to this query

| Score | Mr(calc):   | Delta     | Sequence                        |
|-------|-------------|-----------|---------------------------------|
| 47.7  | 1611.811295 | -0.000263 | <a href="#">LPPTTTCQQQK</a>     |
| 36.4  | 1611.811295 | -0.000263 | <a href="#">LPPTTTCQQQK</a>     |
| 34.4  | 1611.811295 | -0.000263 | <a href="#">LPPTTTCQQQK</a>     |
| 5.6   | 1611.803406 | 0.007626  | <a href="#">TPIKMGISASTMTMK</a> |
| 4.8   | 1611.829010 | -0.017978 | <a href="#">EDNSTYIMRVLKK</a>   |
| 2.3   | 1611.817780 | -0.006748 | <a href="#">KMAKSFTAEDIVK</a>   |
| 1.8   | 1611.803406 | 0.007626  | <a href="#">TPIKMGISASTMTMK</a> |

# MASCOT Search Results

## Peptide View

MS/MS Fragmentation of **LPPTTTCQQQK**

Found in **CFAB\_HUMAN**, Complement factor B OS=Homo sapiens GN=CFB PE=1 SV=2

Match to Query 31052: 1611.814968 from(806.914760,2+) rtinseconds(1485) index(1852)

Title: Locus:1.1.1.3036.18 File:"2013-07-02 CLN FXIII 180 min 3rd F 1.wiff"

Data file C:\Program Files (x86)\Matrix Science\Mascot Daemon\mgf\9 FXIII 180 min 3rd\mascot\_daemon\_merge.mgf

Click mouse within plot area to zoom in by factor of two about that point

Or, Plot from  to  Da

Label all possible matches  Label matches used for scoring

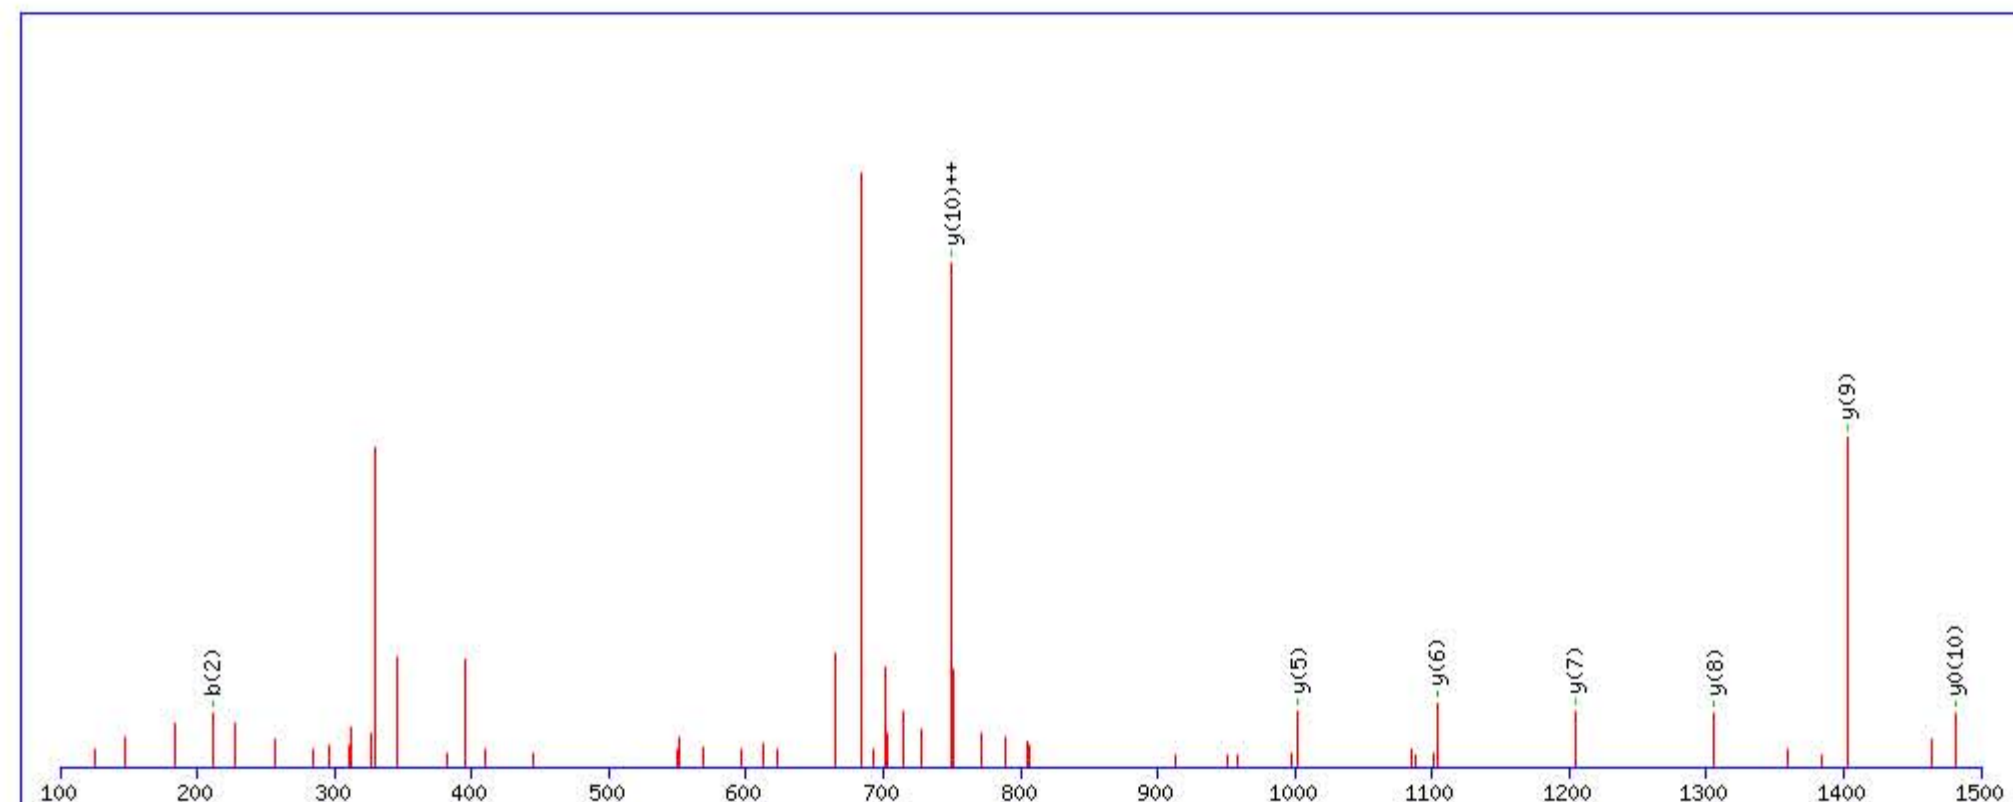

Monoisotopic mass of neutral peptide Mr(calc): 1611.811295

Fixed modifications: Carbamidomethyl (C) (apply to specified residues or termini only)

Variable modifications:

Q10 : Biotin:Thermo-21345 (Q)

Ions Score: 26 Expect: 0.0064

Matches : 8/90 fragment ions using 14 most intense peaks [\(help\)](#)

| #  | b                 | b <sup>++</sup> | b <sup>*</sup> | b <sup>*++</sup> | b <sup>0</sup> | b <sup>0++</sup> | Seq. | y                  | y <sup>++</sup>   | y <sup>*</sup> | y <sup>*++</sup> | y <sup>0</sup>     | y <sup>0++</sup> | #  |
|----|-------------------|-----------------|----------------|------------------|----------------|------------------|------|--------------------|-------------------|----------------|------------------|--------------------|------------------|----|
| 1  | 114.091340        | 57.549308       |                |                  |                |                  | L    |                    |                   |                |                  |                    |                  | 11 |
| 2  | <b>211.144104</b> | 106.075690      |                |                  |                |                  | P    | 1499.734500        | <b>750.370888</b> | 1482.707951    | 741.857614       | <b>1481.723935</b> | 741.365606       | 10 |
| 3  | 308.196868        | 154.602072      |                |                  |                |                  | P    | <b>1402.681736</b> | 701.844506        | 1385.655187    | 693.331232       | 1384.671171        | 692.839224       | 9  |
| 4  | 409.244547        | 205.125911      |                |                  | 391.233982     | 196.120629       | T    | <b>1305.628972</b> | 653.318124        | 1288.602423    | 644.804850       | 1287.618407        | 644.312842       | 8  |
| 5  | 510.292226        | 255.649751      |                |                  | 492.281661     | 246.644468       | T    | <b>1204.581293</b> | 602.794285        | 1187.554744    | 594.281010       | 1186.570728        | 593.789002       | 7  |
| 6  | 611.339905        | 306.173591      |                |                  | 593.329340     | 297.168308       | T    | <b>1103.533614</b> | 552.270445        | 1086.507065    | 543.757171       | 1085.523049        | 543.265163       | 6  |
| 7  | 771.370554        | 386.188915      |                |                  | 753.359989     | 377.183633       | C    | <b>1002.485935</b> | 501.746606        | 985.459386     | 493.233331       |                    |                  | 5  |
| 8  | 899.429132        | 450.218204      | 882.402583     | 441.704930       | 881.418567     | 441.212922       | Q    | 842.455286         | 421.731281        | 825.428737     | 413.218007       |                    |                  | 4  |
| 9  | 1027.487710       | 514.247493      | 1010.461161    | 505.734219       | 1009.477145    | 505.242211       | Q    | 714.396708         | 357.701992        | 697.370159     | 349.188718       |                    |                  | 3  |
| 10 | 1466.713036       | 733.860156      | 1449.686487    | 725.346882       | 1448.702471    | 724.854874       | Q    | 586.338130         | 293.672703        | 569.311581     | 285.159429       |                    |                  | 2  |
| 11 |                   |                 |                |                  |                |                  | K    | 147.112804         | 74.060040         | 130.086255     | 65.546765        |                    |                  | 1  |

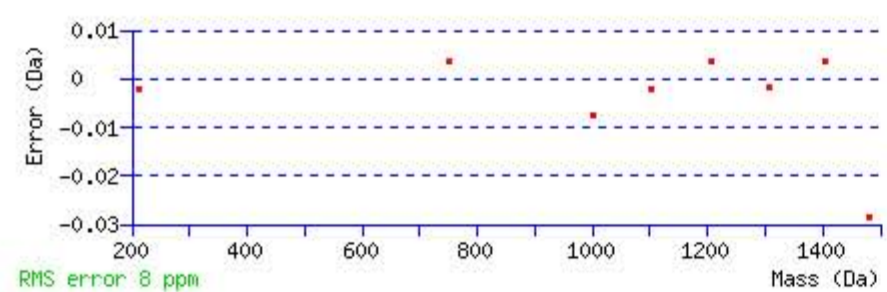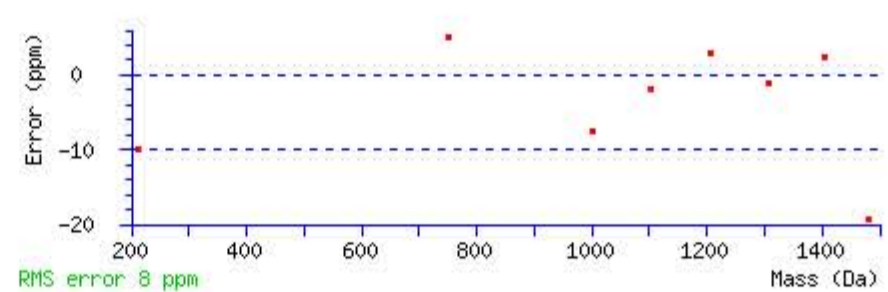

NCBI BLAST search of **LPPTTTCQQQK**

(Parameters: blastp, nr protein database, expect=20000, no filter, PAM30)

Other BLAST [web gateways](#)

### All matches to this query

| Score | Mr(calc):   | Delta     | Sequence                      |
|-------|-------------|-----------|-------------------------------|
| 26.1  | 1611.811295 | 0.003673  | <a href="#">LPPTTTCQQQK</a>   |
| 26.1  | 1611.811295 | 0.003673  | <a href="#">LPPTTTCQQQK</a>   |
| 26.1  | 1611.811295 | 0.003673  | <a href="#">LPPTTTCQQQK</a>   |
| 0.6   | 1611.826324 | -0.011356 | <a href="#">LQSHMDALRKQNR</a> |

# MASCOT Search Results

## Peptide View

MS/MS Fragmentation of **LPPTTTCQQQK**

Found in **CFAB\_HUMAN**, Complement factor B OS=Homo sapiens GN=CFB PE=1 SV=2

Match to Query 37853: 1922.984952 from(642.002260,3+) rtinseconds(1831) index(3922)

Title: Locus:1.1.1.3157.14 File:"2013-07-02 CLN FXIII 180 min 3rd F 1.wiff"

Data file C:\Program Files (x86)\Matrix Science\Mascot Daemon\mgf\9 FXIII 180 min 3rd\mascot\_daemon\_merge.mgf

Click mouse within plot area to zoom in by factor of two about that point

Or, Plot from  to  Da

Label all possible matches  Label matches used for scoring

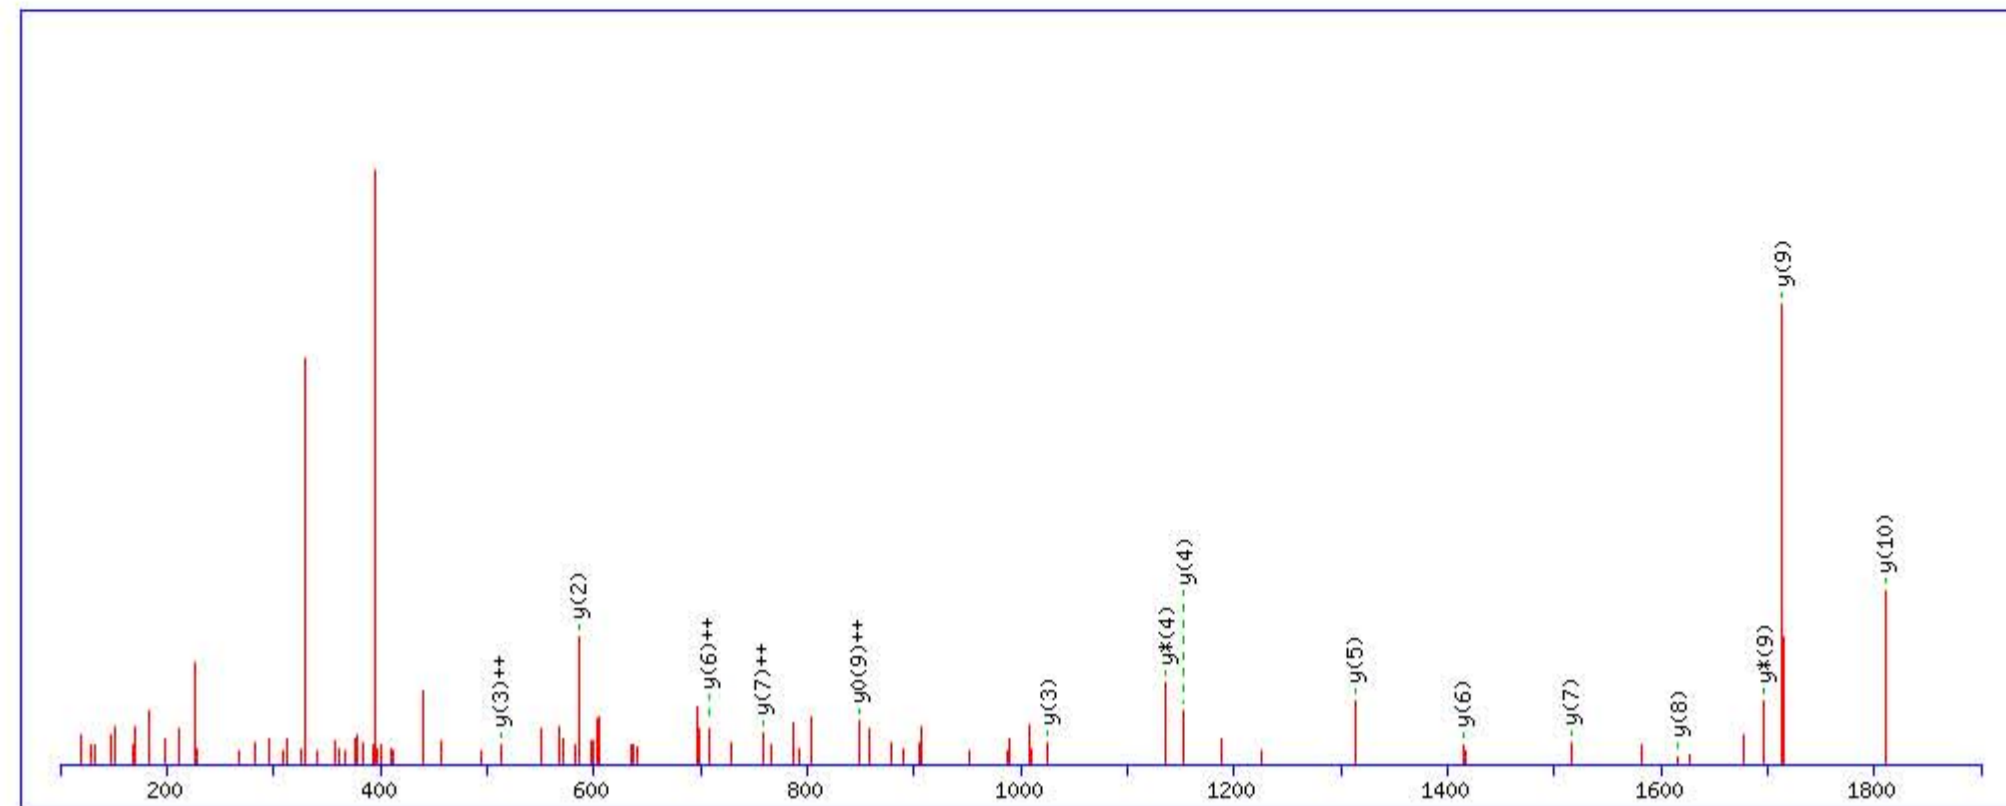

Monoisotopic mass of neutral peptide Mr(calc): 1922.978043

Fixed modifications: Carbamidomethyl (C) (apply to specified residues or termini only)

Variable modifications:

Q9 : Biotin:Thermo-21345 (Q)

Q10 : Biotin:Thermo-21345 (Q)

Ions Score: 31 Expect: 0.0012

Matches : 15/90 fragment ions using 45 most intense peaks [\(help\)](#)

| #  | b           | b <sup>++</sup> | b <sup>*</sup> | b <sup>+++</sup> | b <sup>0</sup> | b <sup>0++</sup> | Seq. | y           | y <sup>++</sup> | y <sup>*</sup> | y <sup>+++</sup> | y <sup>0</sup> | y <sup>0++</sup> | #  |
|----|-------------|-----------------|----------------|------------------|----------------|------------------|------|-------------|-----------------|----------------|------------------|----------------|------------------|----|
| 1  | 114.091340  | 57.549308       |                |                  |                |                  | L    |             |                 |                |                  |                |                  | 11 |
| 2  | 211.144104  | 106.075690      |                |                  |                |                  | P    | 1810.901248 | 905.954262      | 1793.874699    | 897.440988       | 1792.890683    | 896.948980       | 10 |
| 3  | 308.196868  | 154.602072      |                |                  |                |                  | P    | 1713.848484 | 857.427880      | 1696.821935    | 848.914606       | 1695.837919    | 848.422598       | 9  |
| 4  | 409.244547  | 205.125911      |                |                  | 391.233982     | 196.120629       | T    | 1616.795720 | 808.901498      | 1599.769171    | 800.388224       | 1598.785155    | 799.896216       | 8  |
| 5  | 510.292226  | 255.649751      |                |                  | 492.281661     | 246.644468       | T    | 1515.748041 | 758.377659      | 1498.721492    | 749.864384       | 1497.737476    | 749.372376       | 7  |
| 6  | 611.339905  | 306.173591      |                |                  | 593.329340     | 297.168308       | T    | 1414.700362 | 707.853819      | 1397.673813    | 699.340545       | 1396.689797    | 698.848537       | 6  |
| 7  | 771.370554  | 386.188915      |                |                  | 753.359989     | 377.183633       | C    | 1313.652683 | 657.329980      | 1296.626134    | 648.816705       |                |                  | 5  |
| 8  | 899.429132  | 450.218204      | 882.402583     | 441.704930       | 881.418567     | 441.212922       | Q    | 1153.622034 | 577.314655      | 1136.595485    | 568.801381       |                |                  | 4  |
| 9  | 1338.654458 | 669.830867      | 1321.627909    | 661.317593       | 1320.643893    | 660.825585       | Q    | 1025.563456 | 513.285366      | 1008.536907    | 504.772092       |                |                  | 3  |
| 10 | 1777.879784 | 889.443530      | 1760.853235    | 880.930256       | 1759.869219    | 880.438248       | Q    | 586.338130  | 293.672703      | 569.311581     | 285.159429       |                |                  | 2  |
| 11 |             |                 |                |                  |                |                  | K    | 147.112804  | 74.060040       | 130.086255     | 65.546765        |                |                  | 1  |

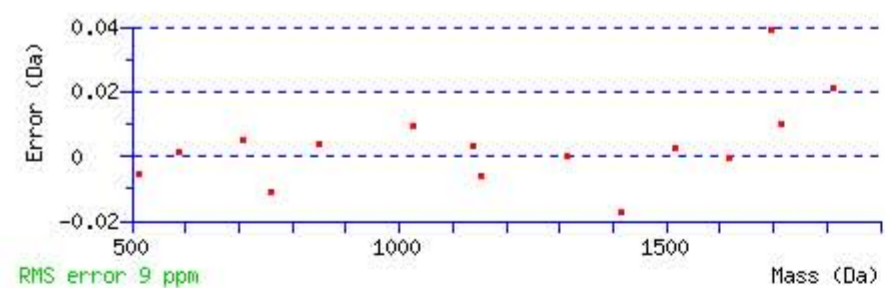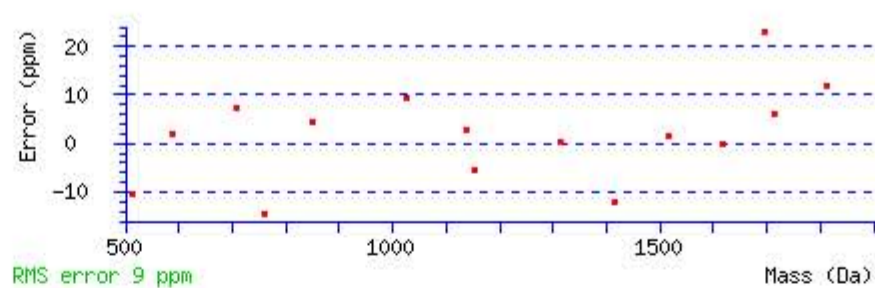

NCBI BLAST search of **LPPTTTCQQQK**

(Parameters: blastp, nr protein database, expect=20000, no filter, PAM30)

Other BLAST [web gateways](#)

All matches to this query

| Score | Mr(calc):   | Delta     | Sequence                         |
|-------|-------------|-----------|----------------------------------|
| 31.3  | 1922.978043 | 0.006909  | <a href="#">LPPTTTCQQQK</a>      |
| 23.2  | 1922.978043 | 0.006909  | <a href="#">LPPTTTCQQQK</a>      |
| 15.7  | 1922.978043 | 0.006909  | <a href="#">LPPTTTCQQQK</a>      |
| 0.2   | 1923.003632 | -0.018680 | <a href="#">AKELHVQNVHMYLPTK</a> |

Mascot: <http://www.matrixscience.com/>

# MASCOT Search Results

## Peptide View

MS/MS Fragmentation of **YGQTIKPIKLPCTEGTTR**

Found in **CFAB\_HUMAN**, Complement factor B OS=Homo sapiens GN=CFB PE=1 SV=2

Match to Query 47029: 2433.198042 from(812.073290,3+) rtinseconds(2076) index(19458)

Title: Locus:1.1.1.3288.18 File:"2013-07-02 CLN FXIII 180 min 3rd F 2.wiff"

Data file C:\Program Files (x86)\Matrix Science\Mascot Daemon\mgf9 FXIII 180 min 3rd\mascot\_daemon\_merge.mgf

Click mouse within plot area to zoom in by factor of two about that point

Or, Plot from  to  Da

Label all possible matches  Label matches used for scoring

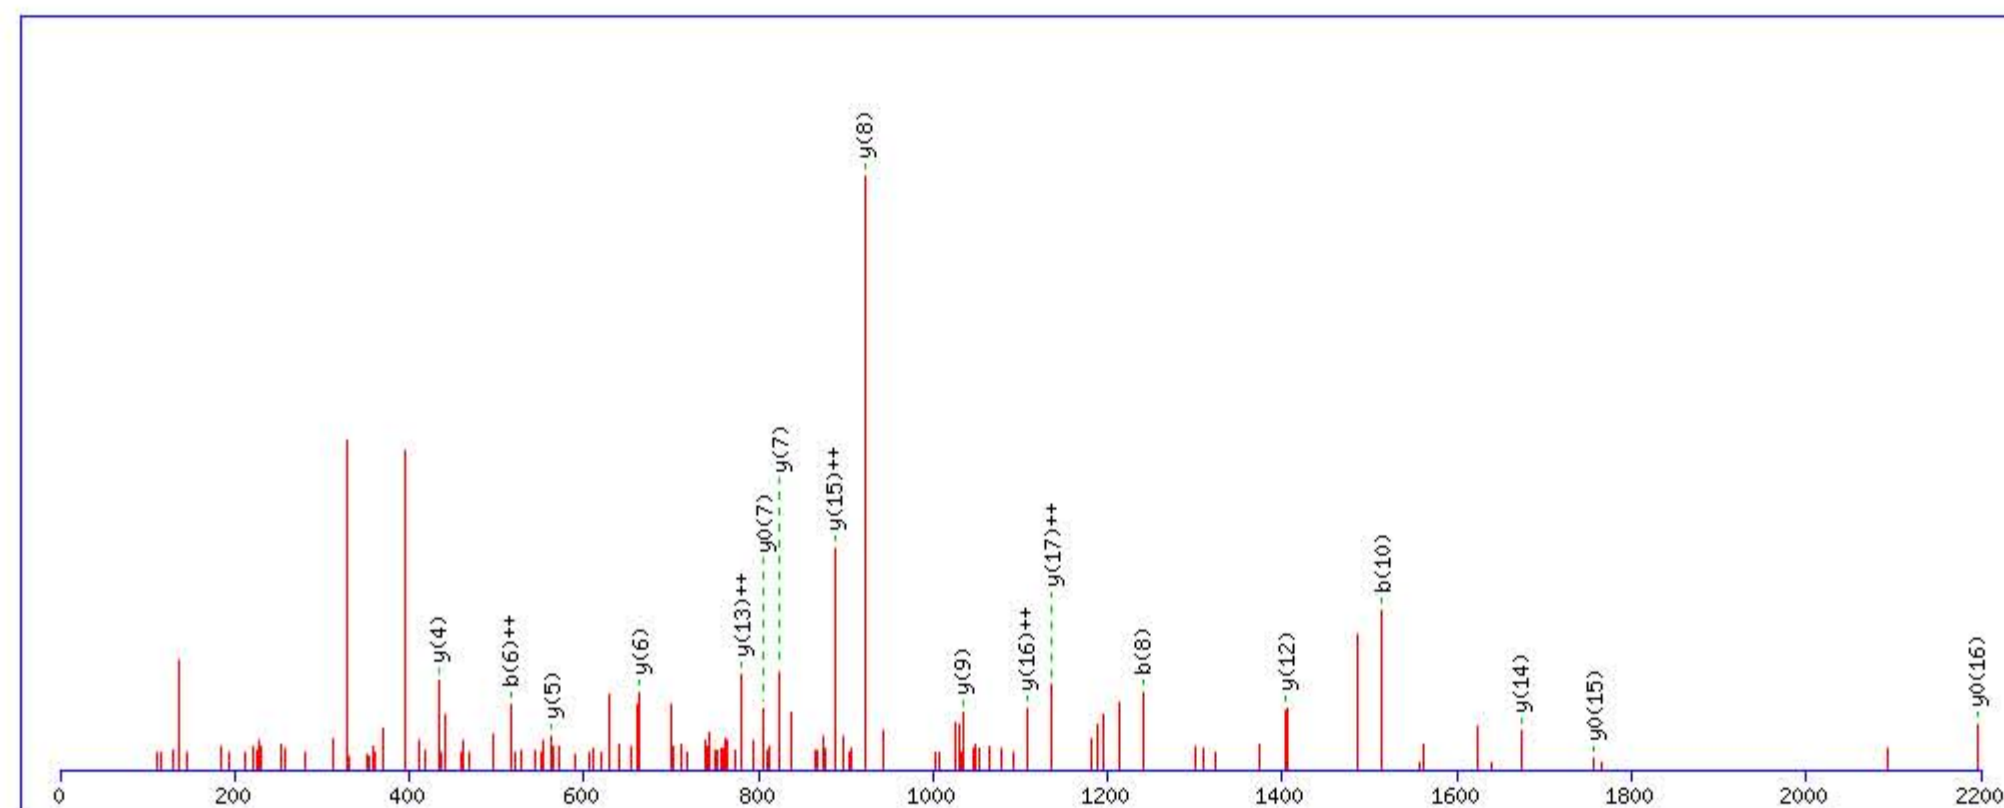

Monoisotopic mass of neutral peptide Mr(calc): 2433.196701

Fixed modifications: Carbamidomethyl (C) (apply to specified residues or termini only)

Variable modifications:

Q3 : Biotin:Thermo-21345 (Q)

Ions Score: 38 Expect: 0.0039

Matches : 18/192 fragment ions using 35 most intense peaks [\(help\)](#)

| #  | b           | b <sup>++</sup> | b <sup>*</sup> | b <sup>***</sup> | b <sup>0</sup> | b <sup>0++</sup> | Seq. | y           | y <sup>++</sup> | y <sup>*</sup> | y <sup>***</sup> | y <sup>0</sup> | y <sup>0++</sup> | #  |
|----|-------------|-----------------|----------------|------------------|----------------|------------------|------|-------------|-----------------|----------------|------------------|----------------|------------------|----|
| 1  | 164.070605  | 82.538940       |                |                  |                |                  | Y    |             |                 |                |                  |                |                  | 18 |
| 2  | 221.092069  | 111.049673      |                |                  |                |                  | G    | 2271.140644 | 1136.073960     | 2254.114095    | 1127.560685      | 2253.130079    | 1127.068677      | 17 |
| 3  | 660.317395  | 330.662336      | 643.290846     | 322.149061       |                |                  | Q    | 2214.119180 | 1107.563228     | 2197.092631    | 1099.049953      | 2196.108615    | 1098.557945      | 16 |
| 4  | 761.365074  | 381.186175      | 744.338525     | 372.672901       | 743.354509     | 372.180893       | T    | 1774.893854 | 887.950565      | 1757.867305    | 879.437290       | 1756.883289    | 878.945282       | 15 |
| 5  | 874.449138  | 437.728207      | 857.422589     | 429.214933       | 856.438573     | 428.722925       | I    | 1673.846175 | 837.426725      | 1656.819626    | 828.913451       | 1655.835610    | 828.421443       | 14 |
| 6  | 1030.550249 | 515.778763      | 1013.523700    | 507.265488       | 1012.539684    | 506.773480       | R    | 1560.762111 | 780.884693      | 1543.735562    | 772.371419       | 1542.751546    | 771.879411       | 13 |
| 7  | 1127.603013 | 564.305145      | 1110.576464    | 555.791870       | 1109.592448    | 555.299862       | P    | 1404.661000 | 702.834138      | 1387.634451    | 694.320863       | 1386.650435    | 693.828855       | 12 |
| 8  | 1240.687077 | 620.847177      | 1223.660528    | 612.333902       | 1222.676512    | 611.841894       | I    | 1307.608236 | 654.307756      | 1290.581687    | 645.794481       | 1289.597671    | 645.302473       | 11 |
| 9  | 1400.717726 | 700.862501      | 1383.691177    | 692.349227       | 1382.707161    | 691.857219       | C    | 1194.524172 | 597.765724      | 1177.497623    | 589.252449       | 1176.513607    | 588.760441       | 10 |
| 10 | 1513.801790 | 757.404533      | 1496.775241    | 748.891259       | 1495.791225    | 748.399250       | L    | 1034.493523 | 517.750399      | 1017.466974    | 509.237125       | 1016.482958    | 508.745117       | 9  |
| 11 | 1610.854554 | 805.930915      | 1593.828005    | 797.417641       | 1592.843989    | 796.925633       | P    | 921.409459  | 461.208367      | 904.382910     | 452.695093       | 903.398894     | 452.203085       | 8  |
| 12 | 1770.885203 | 885.946240      | 1753.858654    | 877.432965       | 1752.874638    | 876.940957       | C    | 824.356695  | 412.681985      | 807.330146     | 404.168711       | 806.346130     | 403.676703       | 7  |
| 13 | 1871.932882 | 936.470079      | 1854.906333    | 927.956805       | 1853.922317    | 927.464797       | T    | 664.326046  | 332.666661      | 647.299497     | 324.153386       | 646.315481     | 323.661378       | 6  |
| 14 | 2000.975475 | 1000.991376     | 1983.948926    | 992.478101       | 1982.964910    | 991.986093       | E    | 563.278367  | 282.142821      | 546.251818     | 273.629547       | 545.267802     | 273.137539       | 5  |
| 15 | 2057.996939 | 1029.502107     | 2040.970390    | 1020.988833      | 2039.986374    | 1020.496825      | G    | 434.235774  | 217.621525      | 417.209225     | 209.108250       | 416.225209     | 208.616242       | 4  |
| 16 | 2159.044618 | 1080.025947     | 2142.018069    | 1071.512672      | 2141.034053    | 1071.020664      | T    | 377.214310  | 189.110793      | 360.187761     | 180.597518       | 359.203745     | 180.105510       | 3  |
| 17 | 2260.092297 | 1130.549786     | 2243.065748    | 1122.036512      | 2242.081732    | 1121.544504      | T    | 276.166631  | 138.586953      | 259.140082     | 130.073679       | 258.156066     | 129.581671       | 2  |
| 18 |             |                 |                |                  |                |                  | R    | 175.118952  | 88.063114       | 158.092403     | 79.549839        |                |                  | 1  |

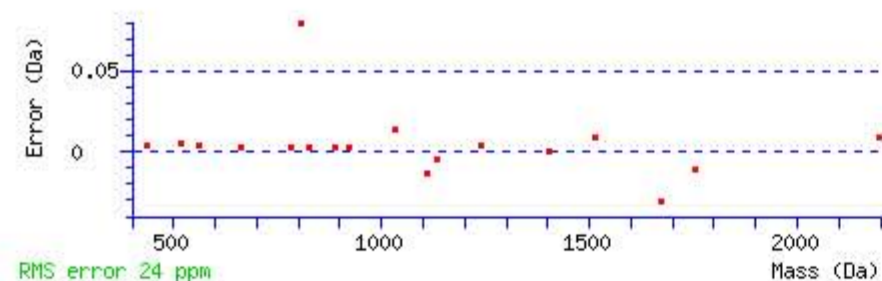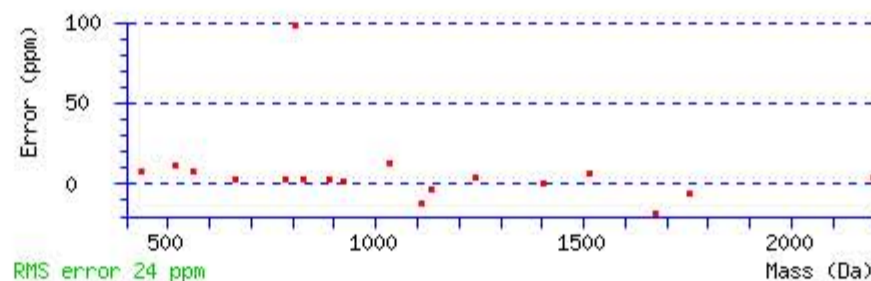

NCBI BLAST search of **YGQTIKPIKLPCTEGTTR**

(Parameters: blastp, nr protein database, expect=20000, no filter, PAM30)

Other BLAST [web gateways](#)

All matches to this query

| Score | Mr(calc):   | Delta    | Sequence                           |
|-------|-------------|----------|------------------------------------|
| 38.3  | 2433.196701 | 0.001341 | <a href="#">YGQTIKPIKLPCTEGTTR</a> |

Mascot: <http://www.matrixscience.com/>

# Mascot Search Results

## Peptide View

MS/MS Fragmentation of **LLQEGQALEYVCPSPGFYPYPVQTR**

Found in **CFAB\_HUMAN**, Complement factor B OS=Homo sapiens GN=CFB PE=1 SV=2

Match to Query 54869: 3125.572602 from(1042.864810,3+) rtinseconds(2705) index(8692)

Title: Locus:1.1.1.3461.13 File:"2013-07-02 CLN FXIII 180 min 3rd F 1.wiff"

Data file C:\Program Files (x86)\Matrix Science\Mascot Daemon\mgf9 FXIII 180 min 3rd\mascot\_daemon\_merge.mgf

Click mouse within plot area to zoom in by factor of two about that point

Or, Plot from  to  Da

Label all possible matches  Label matches used for scoring

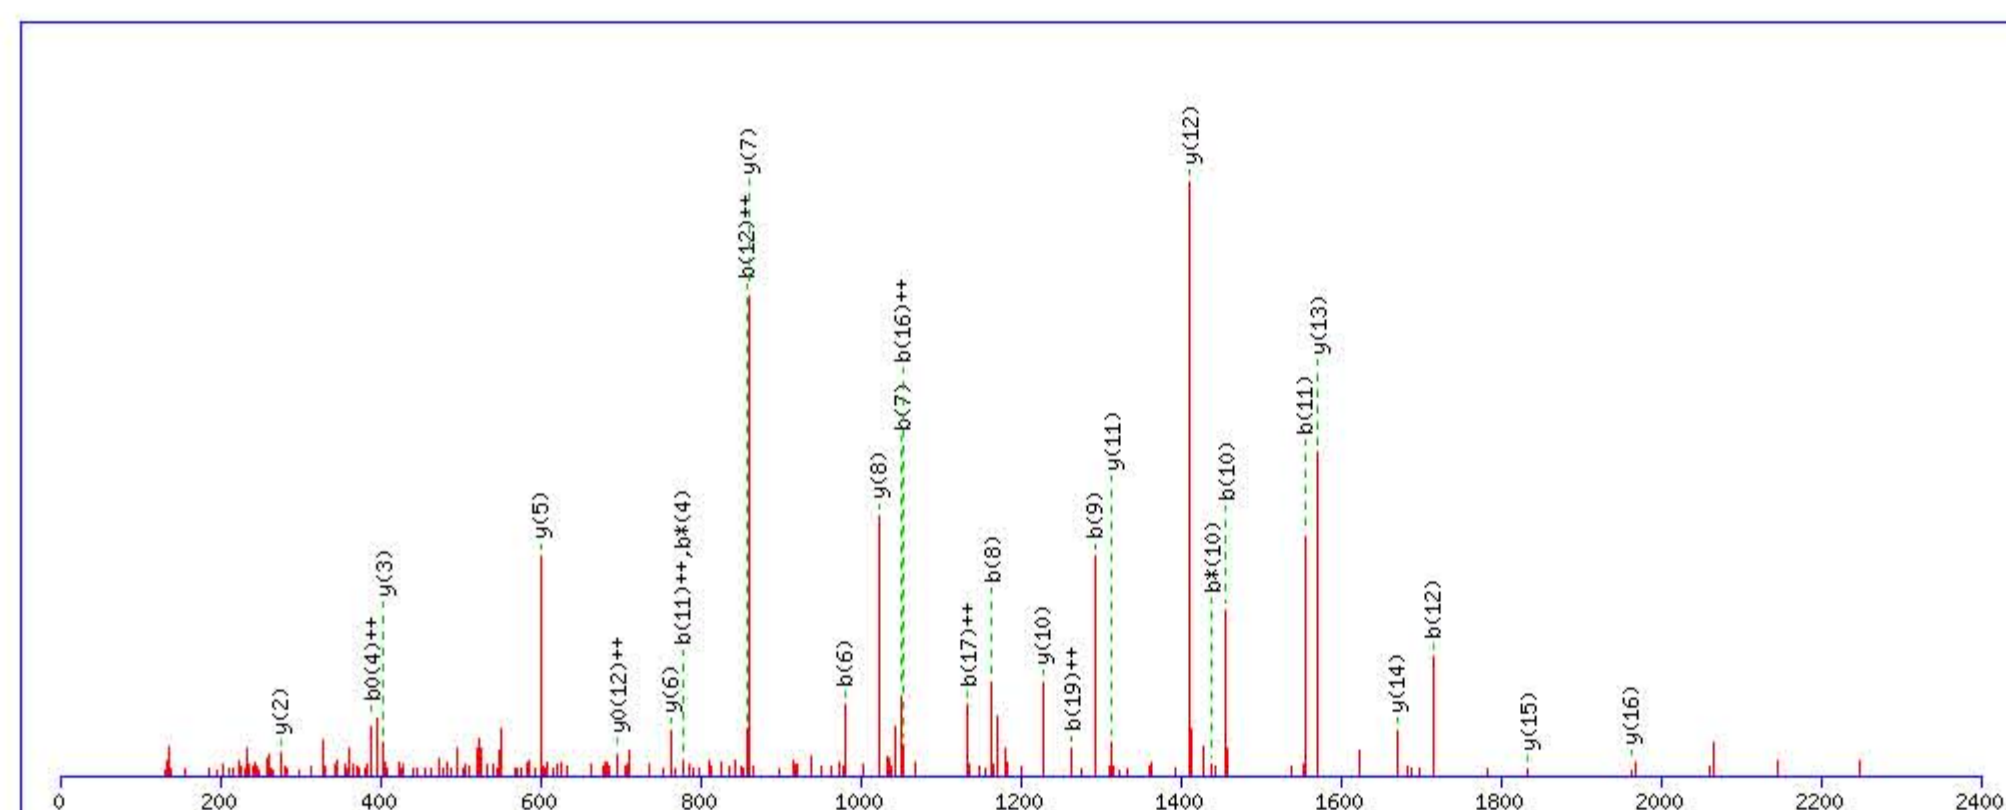

Monoisotopic mass of neutral peptide Mr(calc): 3125.535446

Fixed modifications: Carbamidomethyl (C) (apply to specified residues or termini only)

Variable modifications:

Q3 : Biotin:Thermo-21345 (Q)

Ions Score: 62 Expect: 2e-005

Matches : 29/264 fragment ions using 58 most intense peaks [\(help\)](#)

| #  | b           | b <sup>++</sup> | b <sup>+</sup> | b <sup>+++</sup> | b <sup>0</sup> | b <sup>0++</sup> | Seq. | y           | y <sup>++</sup> | y <sup>+</sup> | y <sup>+++</sup> | y <sup>0</sup> | y <sup>0++</sup> | #  |
|----|-------------|-----------------|----------------|------------------|----------------|------------------|------|-------------|-----------------|----------------|------------------|----------------|------------------|----|
| 1  | 114.091340  | 57.549308       |                |                  |                |                  | L    |             |                 |                |                  |                |                  | 24 |
| 2  | 227.175404  | 114.091340      |                |                  |                |                  | L    | 3013.458667 | 1507.232971     | 2996.432118    | 1498.719697      | 2995.448102    | 1498.227689      | 23 |
| 3  | 666.400730  | 333.704003      | 649.374181     | 325.190729       |                |                  | Q    | 2900.374603 | 1450.690939     | 2883.348054    | 1442.177665      | 2882.364038    | 1441.685657      | 22 |
| 4  | 795.443323  | 398.225300      | 778.416774     | 389.712025       | 777.432758     | 389.220017       | E    | 2461.149277 | 1231.078276     | 2444.122728    | 1222.565002      | 2443.138712    | 1222.072994      | 21 |
| 5  | 852.464787  | 426.736032      | 835.438238     | 418.222757       | 834.454222     | 417.730749       | G    | 2332.106684 | 1166.556980     | 2315.080135    | 1158.043705      | 2314.096119    | 1157.551697      | 20 |
| 6  | 980.523365  | 490.765321      | 963.496816     | 482.252046       | 962.512800     | 481.760038       | Q    | 2275.085220 | 1138.046248     | 2258.058671    | 1129.532973      | 2257.074655    | 1129.040965      | 19 |
| 7  | 1051.560479 | 526.283878      | 1034.533930    | 517.770603       | 1033.549914    | 517.278595       | A    | 2147.026642 | 1074.016959     | 2130.000093    | 1065.503684      | 2129.016077    | 1065.011676      | 18 |
| 8  | 1164.644543 | 582.825910      | 1147.617994    | 574.312635       | 1146.633978    | 573.820627       | L    | 2075.989528 | 1038.498402     | 2058.962979    | 1029.985127      | 2057.978963    | 1029.493119      | 17 |
| 9  | 1293.687136 | 647.347206      | 1276.660587    | 638.833932       | 1275.676571    | 638.341924       | E    | 1962.905464 | 981.956370      | 1945.878915    | 973.443096       | 1944.894899    | 972.951088       | 16 |
| 10 | 1456.750465 | 728.878871      | 1439.723916    | 720.365596       | 1438.739900    | 719.873588       | Y    | 1833.862871 | 917.435074      | 1816.836322    | 908.921799       | 1815.852306    | 908.429791       | 15 |
| 11 | 1555.818879 | 778.413078      | 1538.792330    | 769.899803       | 1537.808314    | 769.407795       | V    | 1670.799542 | 835.903409      | 1653.772993    | 827.390135       | 1652.788977    | 826.898126       | 14 |
| 12 | 1715.849528 | 858.428402      | 1698.822979    | 849.915128       | 1697.838963    | 849.423120       | C    | 1571.731128 | 786.369202      | 1554.704579    | 777.855928       | 1553.720563    | 777.363919       | 13 |
| 13 | 1812.902292 | 906.954784      | 1795.875743    | 898.441510       | 1794.891727    | 897.949502       | P    | 1411.700479 | 706.353877      | 1394.673930    | 697.840603       | 1393.689914    | 697.348595       | 12 |
| 14 | 1899.934320 | 950.470798      | 1882.907771    | 941.957524       | 1881.923755    | 941.465516       | S    | 1314.647715 | 657.827495      | 1297.621166    | 649.314221       | 1296.637150    | 648.822213       | 11 |
| 15 | 1956.955784 | 978.981530      | 1939.929235    | 970.468256       | 1938.945219    | 969.976248       | G    | 1227.615687 | 614.311481      | 1210.589138    | 605.798207       | 1209.605122    | 605.306199       | 10 |
| 16 | 2104.024198 | 1052.515737     | 2086.997649    | 1044.002462      | 2086.013633    | 1043.510454      | F    | 1170.594223 | 585.800749      | 1153.567674    | 577.287475       | 1152.583658    | 576.795467       | 9  |
| 17 | 2267.087527 | 1134.047402     | 2250.060978    | 1125.534127      | 2249.076962    | 1125.042119      | Y    | 1023.525809 | 512.266543      | 1006.499260    | 503.753268       | 1005.515244    | 503.261260       | 8  |
| 18 | 2364.140291 | 1182.573784     | 2347.113742    | 1174.060509      | 2346.129726    | 1173.568501      | P    | 860.462480  | 430.734878      | 843.435931     | 422.221603       | 842.451915     | 421.729595       | 7  |
| 19 | 2527.203620 | 1264.105448     | 2510.177071    | 1255.592173      | 2509.193055    | 1255.100166      | Y    | 763.409716  | 382.208496      | 746.383167     | 373.695221       | 745.399151     | 373.203213       | 6  |
| 20 | 2624.256384 | 1312.631830     | 2607.229835    | 1304.118556      | 2606.245819    | 1303.626548      | P    | 600.346387  | 300.676831      | 583.319838     | 292.163557       | 582.335822     | 291.671549       | 5  |
| 21 | 2723.324798 | 1362.166037     | 2706.298249    | 1353.652762      | 2705.314233    | 1353.160754      | V    | 503.293623  | 252.150449      | 486.267074     | 243.637175       | 485.283058     | 243.145167       | 4  |
| 22 | 2851.383376 | 1426.195326     | 2834.356827    | 1417.682051      | 2833.372811    | 1417.190044      | Q    | 404.225209  | 202.616242      | 387.198660     | 194.102968       | 386.214644     | 193.610960       | 3  |
| 23 | 2952.431055 | 1476.719165     | 2935.404506    | 1468.205891      | 2934.420490    | 1467.713883      | T    | 276.166631  | 138.586953      | 259.140082     | 130.073679       | 258.156066     | 129.581671       | 2  |
| 24 |             |                 |                |                  |                |                  | R    | 175.118952  | 88.063114       | 158.092403     | 79.549839        |                |                  | 1  |

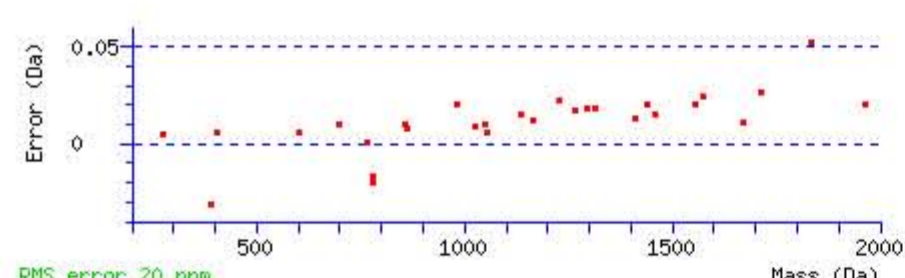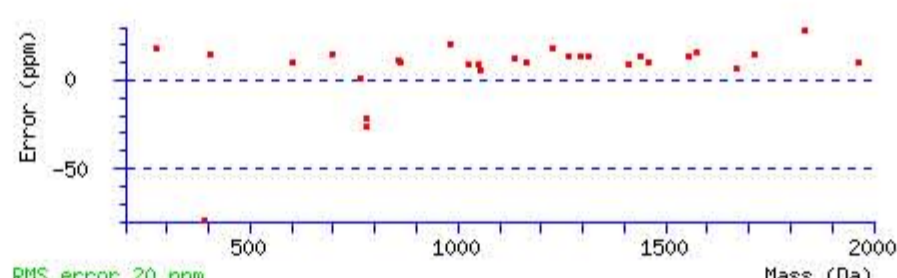

NCBI BLAST search of **LLQEGQALEYVCPSPGFYPYPVQTR**

(Parameters: blastp, nr protein database, expect=20000, no filter, PAM30)

Other BLAST [web gateways](#)

## All matches to this query

| Score | Mr(calc):   | Delta    | Sequence                                  |
|-------|-------------|----------|-------------------------------------------|
| 61.6  | 3125.535446 | 0.037156 | <a href="#">LLQEGQALEYVCPSPGFYPYPVQTR</a> |
| 61.6  | 3125.535446 | 0.037156 | <a href="#">LLQEGQALEYVCPSPGFYPYPVQTR</a> |

# MASCOT Search Results

## Peptide View

MS/MS Fragmentation of **VQVLLGAHLSQPEPSK**

Found in **CFAD\_HUMAN**, Complement factor D OS=Homo sapiens GN=CFD PE=1 SV=5

Match to Query 41616: 2100.138852 from(701.053560,3+) rtinseconds(2001) index(31891)

Title: Locus:1.1.1.3360.13 File:"2013-07-02 CLN FXIII 180 min 3rd F 3.wiff"

Data file C:\Program Files (x86)\Matrix Science\Mascot Daemon\mgf9 FXIII 180 min 3rd\mascot\_daemon\_merge.mgf

Click mouse within plot area to zoom in by factor of two about that point

Or, Plot from  to  Da

Label all possible matches  Label matches used for scoring

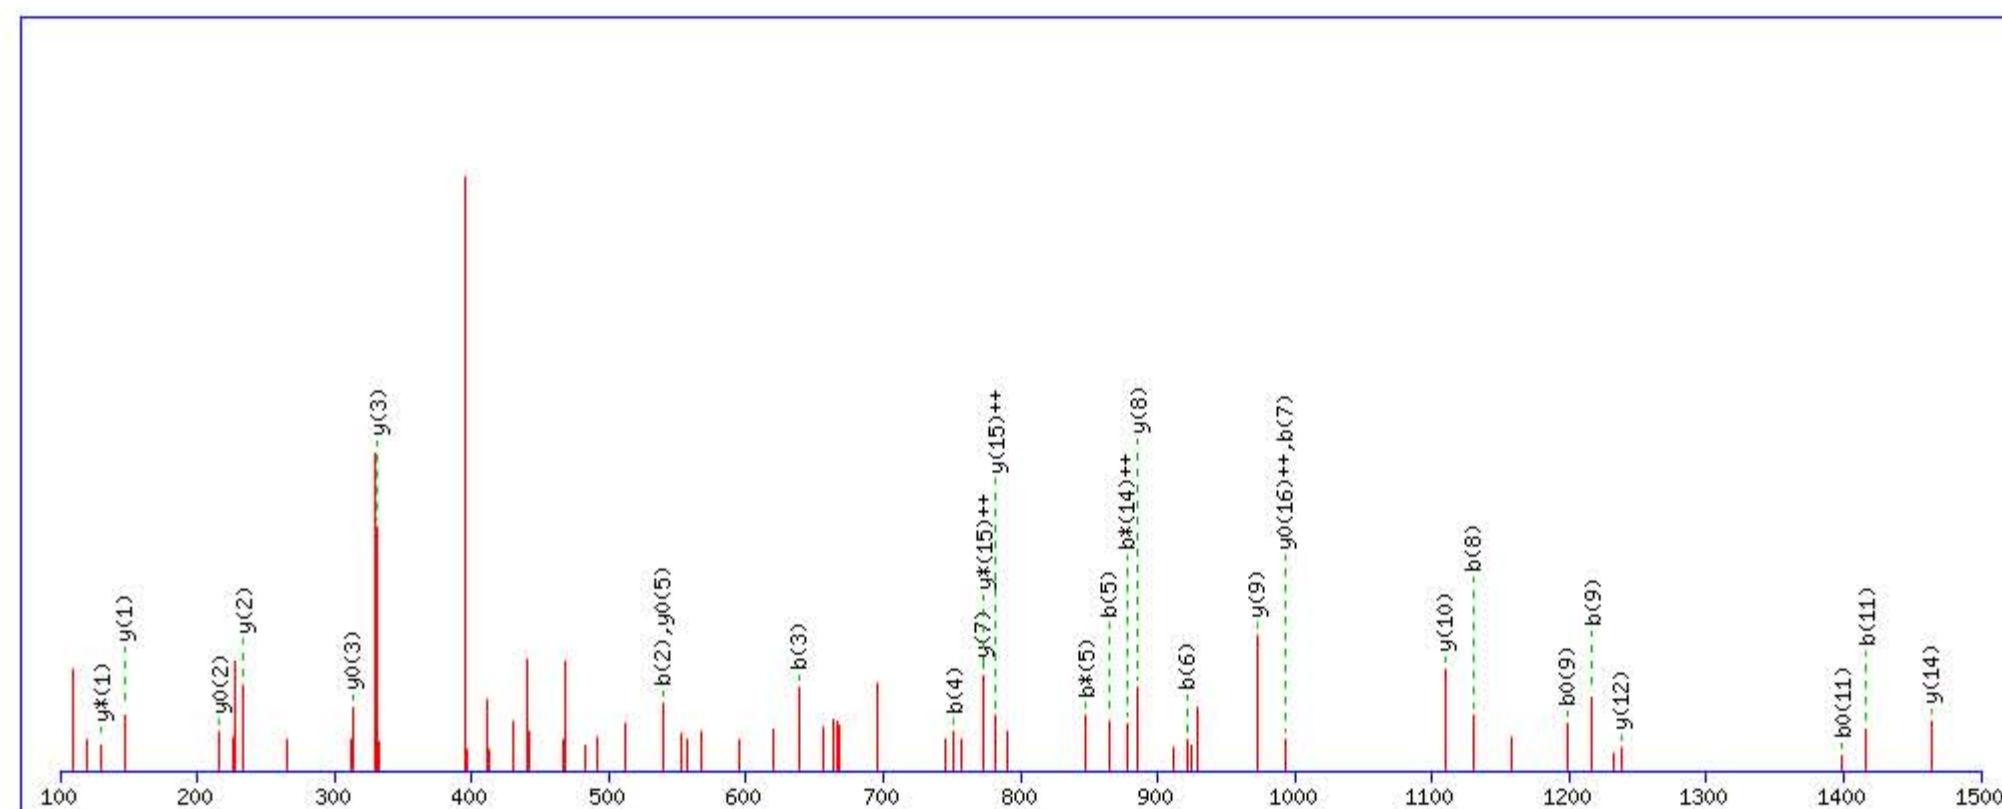

Monoisotopic mass of neutral peptide Mr(calc): 2100.140137

Fixed modifications: Carbamidomethyl (C) (apply to specified residues or termini only)

Variable modifications:

Q2 : Biotin:Thermo-21345 (Q)

Ions Score: 62 Expect: 1.3e-005

Matches : 29/172 fragment ions using 46 most intense peaks [\(help\)](#)

| #  | b                  | b <sup>++</sup> | b <sup>*</sup>    | b <sup>*++</sup>  | b <sup>0</sup>     | b <sup>0++</sup> | Seq. | y                  | y <sup>++</sup>   | y <sup>*</sup>    | y <sup>*++</sup>  | y <sup>0</sup>    | y <sup>0++</sup>  | #  |
|----|--------------------|-----------------|-------------------|-------------------|--------------------|------------------|------|--------------------|-------------------|-------------------|-------------------|-------------------|-------------------|----|
| 1  | 100.075690         | 50.541483       |                   |                   |                    |                  | V    |                    |                   |                   |                   |                   |                   | 17 |
| 2  | <b>539.301016</b>  | 270.154146      | 522.274467        | 261.640872        |                    |                  | Q    | 2002.079009        | 1001.543143       | 1985.052460       | 993.029868        | 1984.068444       | <b>992.537860</b> | 16 |
| 3  | <b>638.369430</b>  | 319.688353      | 621.342881        | 311.175079        |                    |                  | V    | 1562.853683        | <b>781.930480</b> | 1545.827134       | <b>773.417205</b> | 1544.843118       | 772.925197        | 15 |
| 4  | <b>751.453494</b>  | 376.230385      | 734.426945        | 367.717111        |                    |                  | L    | <b>1463.785269</b> | 732.396273        | 1446.758720       | 723.882998        | 1445.774704       | 723.390990        | 14 |
| 5  | <b>864.537558</b>  | 432.772417      | <b>847.511009</b> | 424.259143        |                    |                  | L    | 1350.701205        | 675.854241        | 1333.674656       | 667.340966        | 1332.690640       | 666.848958        | 13 |
| 6  | <b>921.559022</b>  | 461.283149      | 904.532473        | 452.769875        |                    |                  | G    | <b>1237.617141</b> | 619.312209        | 1220.590592       | 610.798934        | 1219.606576       | 610.306926        | 12 |
| 7  | <b>992.596136</b>  | 496.801706      | 975.569587        | 488.288432        |                    |                  | A    | 1180.595677        | 590.801477        | 1163.569128       | 582.288202        | 1162.585112       | 581.796194        | 11 |
| 8  | <b>1129.655048</b> | 565.331162      | 1112.628499       | 556.817888        |                    |                  | H    | <b>1109.558563</b> | 555.282920        | 1092.532014       | 546.769645        | 1091.547998       | 546.277637        | 10 |
| 9  | <b>1216.687076</b> | 608.847176      | 1199.660527       | 600.333902        | <b>1198.676511</b> | 599.841894       | S    | <b>972.499651</b>  | 486.753464        | 955.473102        | 478.240189        | 954.489086        | 477.748181        | 9  |
| 10 | 1329.771140        | 665.389208      | 1312.744591       | 656.875934        | 1311.760575        | 656.383926       | L    | <b>885.467623</b>  | 443.237450        | 868.441074        | 434.724175        | 867.457058        | 434.232167        | 8  |
| 11 | <b>1416.803168</b> | 708.905222      | 1399.776619       | 700.391948        | <b>1398.792603</b> | 699.899940       | S    | <b>772.383559</b>  | 386.695418        | 755.357010        | 378.182143        | 754.372994        | 377.690135        | 7  |
| 12 | 1544.861746        | 772.934511      | 1527.835197       | 764.421237        | 1526.851181        | 763.929229       | Q    | 685.351531         | 343.179404        | 668.324982        | 334.666129        | 667.340966        | 334.174121        | 6  |
| 13 | 1641.914510        | 821.460893      | 1624.887961       | 812.947619        | 1623.903945        | 812.455611       | P    | 557.292953         | 279.150115        | 540.266404        | 270.636840        | <b>539.282388</b> | 270.144832        | 5  |
| 14 | 1770.957103        | 885.982190      | 1753.930554       | <b>877.468915</b> | 1752.946538        | 876.976907       | E    | 460.240189         | 230.623733        | 443.213640        | 222.110458        | 442.229624        | 221.618450        | 4  |
| 15 | 1868.009867        | 934.508572      | 1850.983318       | 925.995297        | 1849.999302        | 925.503289       | P    | <b>331.197596</b>  | 166.102436        | 314.171047        | 157.589162        | <b>313.187031</b> | 157.097154        | 3  |
| 16 | 1955.041895        | 978.024586      | 1938.015346       | 969.511311        | 1937.031330        | 969.019303       | S    | <b>234.144832</b>  | 117.576054        | 217.118283        | 109.062780        | <b>216.134267</b> | 108.570772        | 2  |
| 17 |                    |                 |                   |                   |                    |                  | K    | <b>147.112804</b>  | 74.060040         | <b>130.086255</b> | 65.546765         |                   |                   | 1  |

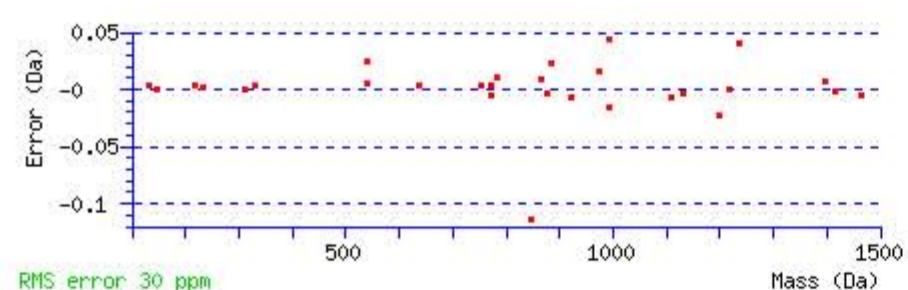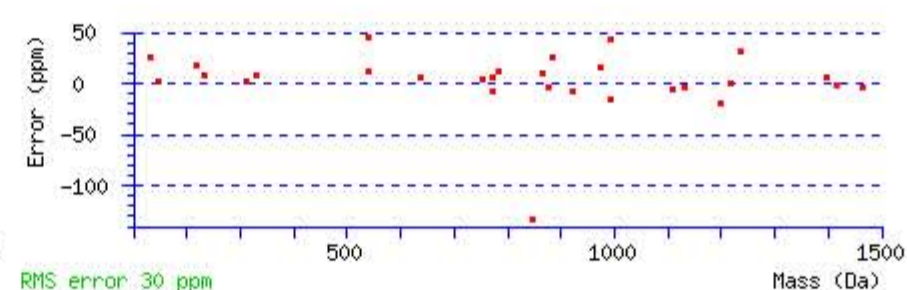

NCBI BLAST search of **VQVLLGAHLSQPEPSK**

(Parameters: blastp, nr protein database, expect=20000, no filter, PAM30)

Other BLAST [web gateways](#)

## All matches to this query

| Score | Mr(calc):   | Delta     | Sequence                         |
|-------|-------------|-----------|----------------------------------|
| 61.9  | 2100.140137 | -0.001285 | <a href="#">VQVLLGAHLSQPEPSK</a> |

Mascot: <http://www.matrixscience.com/>

# MASCOT Search Results

## Peptide View

MS/MS Fragmentation of **SSQESYAHGTK**

Found in **CFAH\_HUMAN**, Complement factor H OS=Homo sapiens GN=CFH PE=1 SV=4

Match to Query 27267: 1504.695012 from(502.572280,3+) rtinseconds(1248) index(14533)

Title: Locus:1.1.1.3000.8 File:"2013-07-02 CLN FXIII 180 min 3rd F 2.wiff"

Data file C:\Program Files (x86)\Matrix Science\Mascot Daemon\mgf9 FXIII 180 min 3rd\mascot\_daemon\_merge.mgf

Click mouse within plot area to zoom in by factor of two about that point

Or, Plot from  to  Da

Label all possible matches  Label matches used for scoring

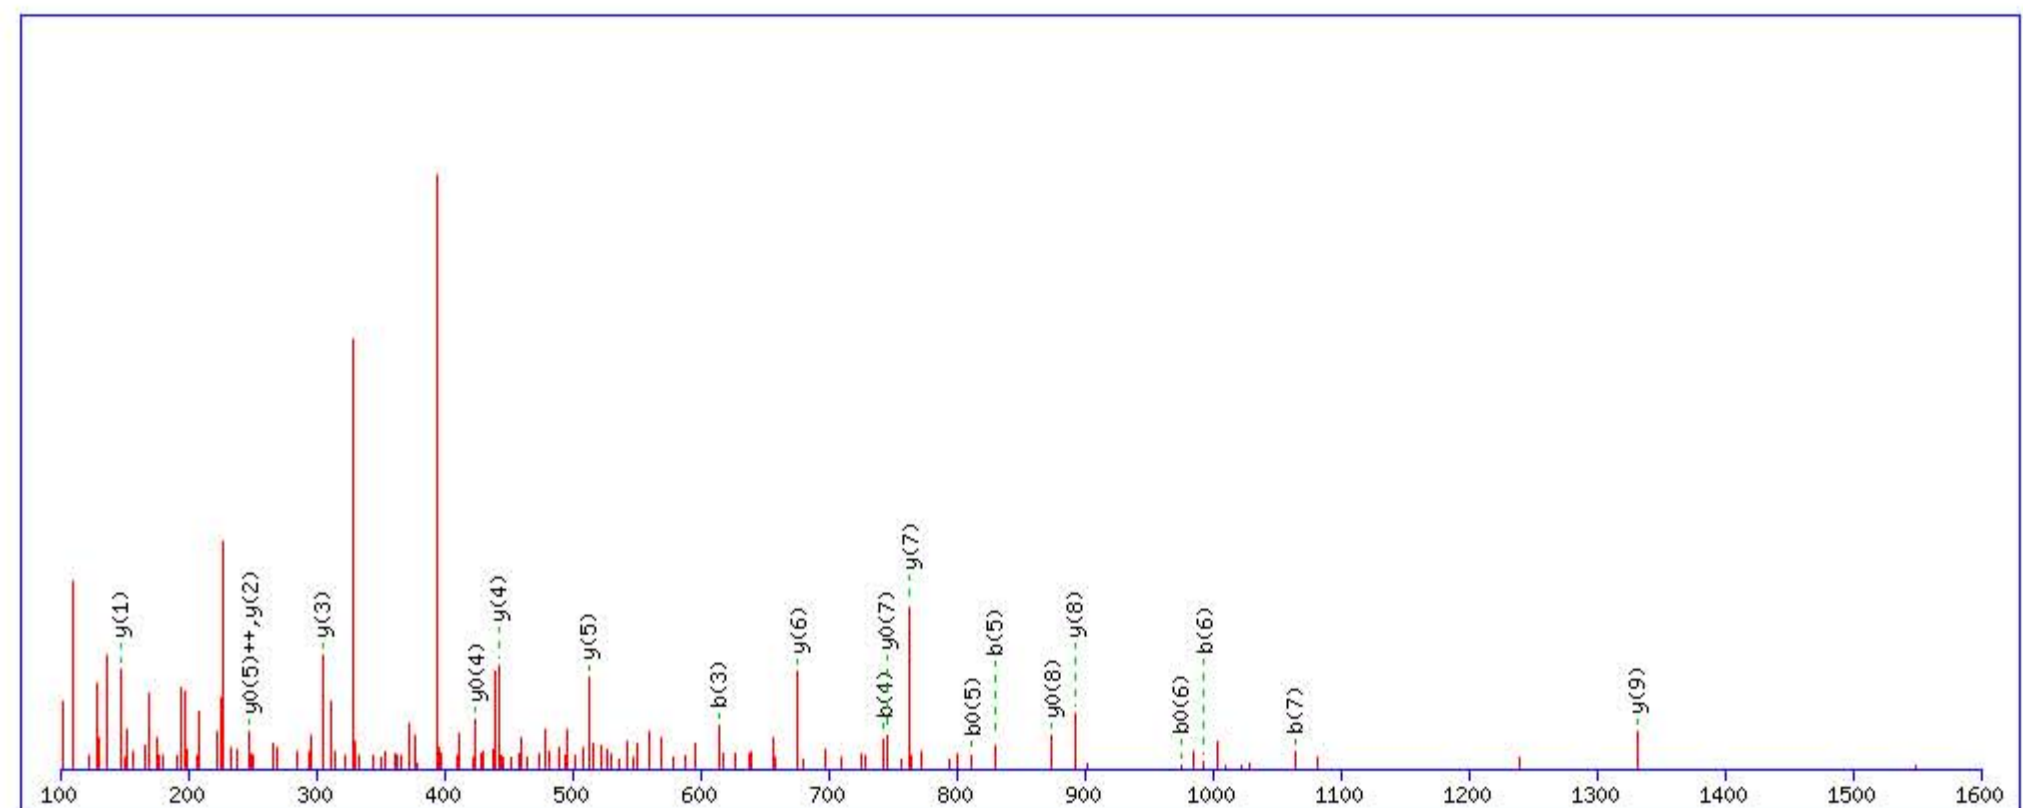

Monoisotopic mass of neutral peptide  $M_r(\text{calc})$ : 1504.698013

Fixed modifications: Carbamidomethyl (C) (apply to specified residues or termini only)

Variable modifications:

Q3 : Biotin:Thermo-21345 (Q)

Ions Score: 45 Expect: 0.00035

Matches : 20/114 fragment ions using 42 most intense peaks [\(help\)](#)

| #  | b                  | b <sup>++</sup> | b <sup>*</sup> | b <sup>*++</sup> | b <sup>0</sup>    | b <sup>0++</sup> | Seq. | y                  | y <sup>++</sup> | y <sup>*</sup> | y <sup>*++</sup> | y <sup>0</sup>    | y <sup>0++</sup>  | #  |
|----|--------------------|-----------------|----------------|------------------|-------------------|------------------|------|--------------------|-----------------|----------------|------------------|-------------------|-------------------|----|
| 1  | 88.039304          | 44.523290       |                |                  | 70.028739         | 35.518008        | S    |                    |                 |                |                  |                   |                   | 11 |
| 2  | 175.071332         | 88.039304       |                |                  | 157.060767        | 79.034021        | S    | 1418.673277        | 709.840276      | 1401.646728    | 701.327002       | 1400.662712       | 700.834994        | 10 |
| 3  | <b>614.296658</b>  | 307.651967      | 597.270109     | 299.138692       | 596.286093        | 298.646684       | Q    | <b>1331.641249</b> | 666.324263      | 1314.614700    | 657.810988       | 1313.630684       | 657.318980        | 9  |
| 4  | <b>743.339251</b>  | 372.173264      | 726.312702     | 363.659989       | 725.328686        | 363.167981       | E    | <b>892.415923</b>  | 446.711600      | 875.389374     | 438.198325       | <b>874.405358</b> | 437.706317        | 8  |
| 5  | <b>830.371279</b>  | 415.689278      | 813.344730     | 407.176003       | <b>812.360714</b> | 406.683995       | S    | <b>763.373330</b>  | 382.190303      | 746.346781     | 373.677029       | <b>745.362765</b> | 373.185021        | 7  |
| 6  | <b>993.434608</b>  | 497.220942      | 976.408059     | 488.707668       | <b>975.424043</b> | 488.215660       | Y    | <b>676.341302</b>  | 338.674289      | 659.314753     | 330.161015       | 658.330737        | 329.669007        | 6  |
| 7  | <b>1064.471722</b> | 532.739499      | 1047.445173    | 524.226225       | 1046.461157       | 523.734217       | A    | <b>513.277973</b>  | 257.142625      | 496.251424     | 248.629350       | 495.267408        | <b>248.137342</b> | 5  |
| 8  | 1201.530634        | 601.268955      | 1184.504085    | 592.755681       | 1183.520069       | 592.263672       | H    | <b>442.240859</b>  | 221.624067      | 425.214310     | 213.110793       | <b>424.230294</b> | 212.618785        | 4  |
| 9  | 1258.552098        | 629.779687      | 1241.525549    | 621.266413       | 1240.541533       | 620.774404       | G    | <b>305.181947</b>  | 153.094611      | 288.155398     | 144.581337       | 287.171382        | 144.089329        | 3  |
| 10 | 1359.599777        | 680.303526      | 1342.573228    | 671.790252       | 1341.589212       | 671.298244       | T    | <b>248.160483</b>  | 124.583879      | 231.133934     | 116.070605       | 230.149918        | 115.578597        | 2  |
| 11 |                    |                 |                |                  |                   |                  | K    | <b>147.112804</b>  | 74.060040       | 130.086255     | 65.546765        |                   |                   | 1  |

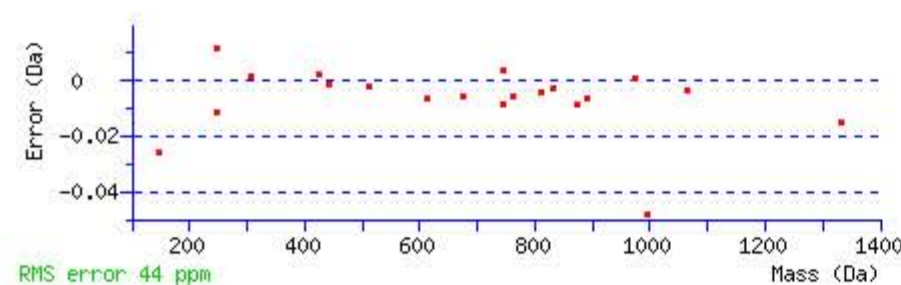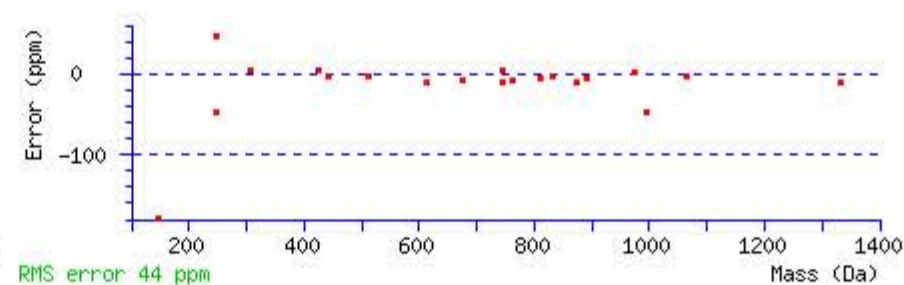

NCBI BLAST search of [SSQESYAHGTK](#)

(Parameters: blastp, nr protein database, expect=20000, no filter, PAM30)

Other BLAST [web gateways](#)

All matches to this query

| Score | $M_r(\text{calc})$ : | Delta     | Sequence                    |
|-------|----------------------|-----------|-----------------------------|
| 45.3  | 1504.698013          | -0.003001 | <a href="#">SSQESYAHGTK</a> |

# MASCOT SCIENCE Mascot Search Results

## Peptide View

MS/MS Fragmentation of **TGDEITYQCR**

Found in **CFAH\_HUMAN**, Complement factor H OS=Homo sapiens GN=CFH PE=1 SV=4

Match to Query 28538: 1552.691508 from(777.353030,2+) rtinseconds(1715) index(17210)

Title: Locus:1.1.1.3163.8 File:"2013-07-02 CLN FXIII 180 min 3rd F 2.wiff"

Data file C:\Program Files (x86)\Matrix Science\Mascot Daemon\mgf\9 FXIII 180 min 3rd\mascot\_daemon\_merge.mgf

Click mouse within plot area to zoom in by factor of two about that point

Or, Plot from  to  Da

Label all possible matches  Label matches used for scoring

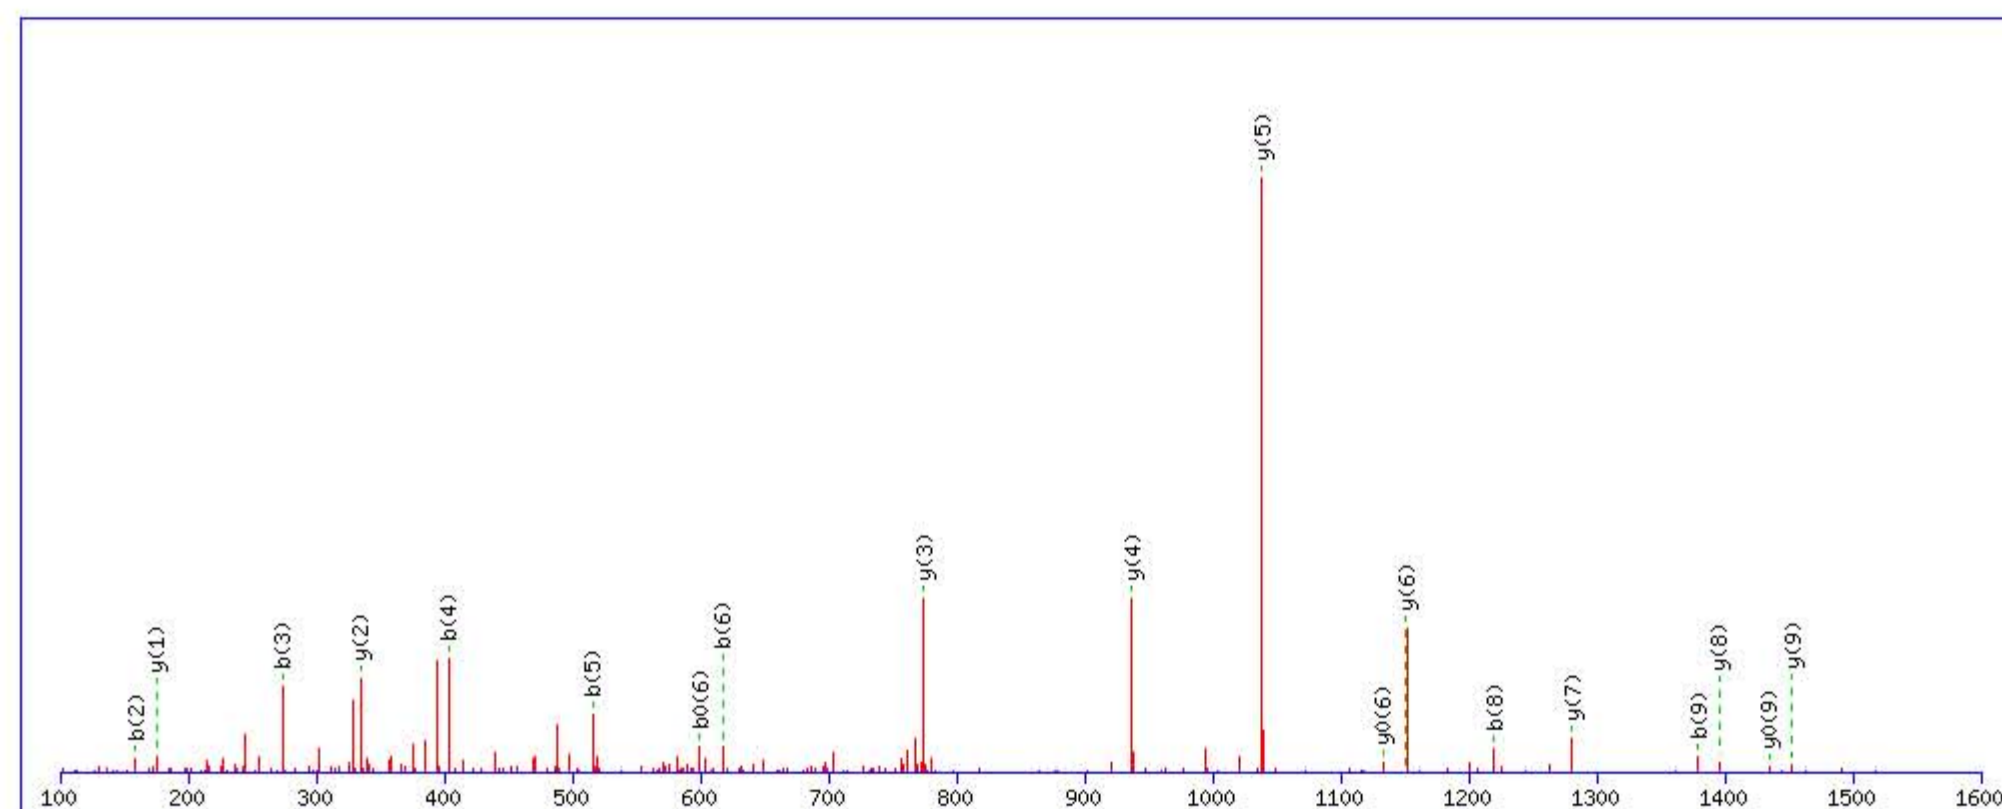

Monoisotopic mass of neutral peptide Mr(calc): 1552.701401

Fixed modifications: Carbamidomethyl (C) (apply to specified residues or termini only)

Variable modifications:

Q8 : Biotin:Thermo-21345 (Q)

Ions Score: 72 Expect: 4.7e-007

Matches : 19/86 fragment ions using 29 most intense peaks [\(help\)](#)

| #  | b                  | b <sup>++</sup> | b <sup>*</sup> | b <sup>*++</sup> | b <sup>0</sup>    | b <sup>0++</sup> | Seq. | y                  | y <sup>++</sup> | y <sup>*</sup> | y <sup>*++</sup> | y <sup>0</sup>     | y <sup>0++</sup> | #  |
|----|--------------------|-----------------|----------------|------------------|-------------------|------------------|------|--------------------|-----------------|----------------|------------------|--------------------|------------------|----|
| 1  | 102.054955         | 51.531116       |                |                  | 84.044390         | 42.525833        | T    |                    |                 |                |                  |                    |                  | 10 |
| 2  | <b>159.076419</b>  | 80.041847       |                |                  | 141.065854        | 71.036565        | G    | <b>1452.660999</b> | 726.834138      | 1435.634450    | 718.320863       | <b>1434.650434</b> | 717.828855       | 9  |
| 3  | <b>274.103362</b>  | 137.555319      |                |                  | 256.092797        | 128.550037       | D    | <b>1395.639535</b> | 698.323406      | 1378.612986    | 689.810131       | 1377.628970        | 689.318123       | 8  |
| 4  | <b>403.145955</b>  | 202.076616      |                |                  | 385.135390        | 193.071333       | E    | <b>1280.612592</b> | 640.809934      | 1263.586043    | 632.296660       | 1262.602027        | 631.804652       | 7  |
| 5  | <b>516.230019</b>  | 258.618648      |                |                  | 498.219454        | 249.613365       | I    | <b>1151.569999</b> | 576.288638      | 1134.543450    | 567.775363       | <b>1133.559434</b> | 567.283355       | 6  |
| 6  | <b>617.277698</b>  | 309.142487      |                |                  | <b>599.267133</b> | 300.137205       | T    | <b>1038.485935</b> | 519.746606      | 1021.459386    | 511.233331       | 1020.475370        | 510.741323       | 5  |
| 7  | 780.341027         | 390.674152      |                |                  | 762.330462        | 381.668869       | Y    | <b>937.438256</b>  | 469.222766      | 920.411707     | 460.709492       |                    |                  | 4  |
| 8  | <b>1219.566353</b> | 610.286815      | 1202.539804    | 601.773540       | 1201.555788       | 601.281532       | Q    | <b>774.374927</b>  | 387.691102      | 757.348378     | 379.177827       |                    |                  | 3  |
| 9  | <b>1379.597002</b> | 690.302139      | 1362.570453    | 681.788865       | 1361.586437       | 681.296857       | C    | <b>335.149601</b>  | 168.078438      | 318.123052     | 159.565164       |                    |                  | 2  |
| 10 |                    |                 |                |                  |                   |                  | R    | <b>175.118952</b>  | 88.063114       | 158.092403     | 79.549839        |                    |                  | 1  |

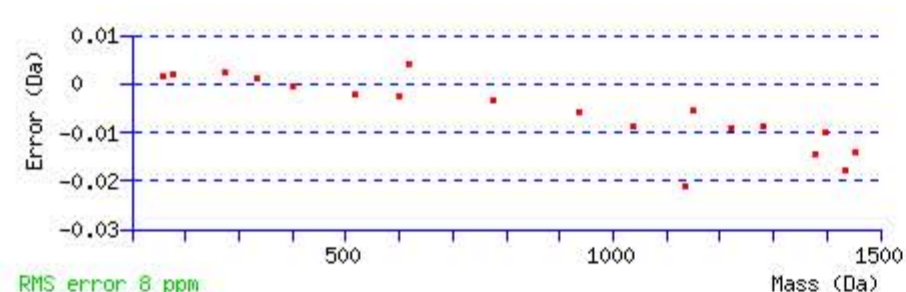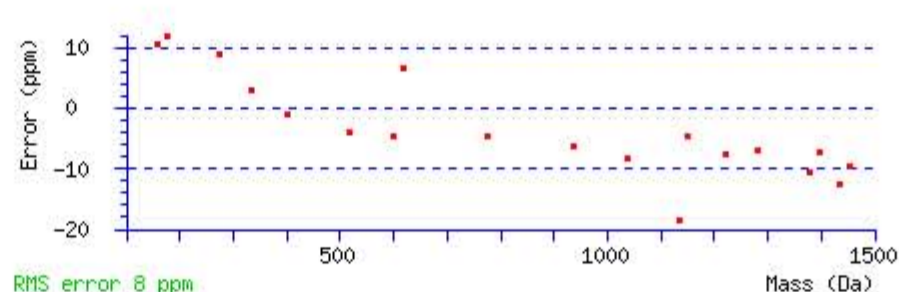

NCBI BLAST search of [TGDEITYQCR](#)

(Parameters: blastp, nr protein database, expect=20000, no filter, PAM30)

Other BLAST [web gateways](#)

All matches to this query

| Score | Mr(calc):   | Delta     | Sequence                       |
|-------|-------------|-----------|--------------------------------|
| 71.8  | 1552.701401 | -0.009893 | <a href="#">TGDEITYQCR</a>     |
| 6.0   | 1552.712616 | -0.021108 | <a href="#">NVGMPVAHMESPER</a> |
| 2.1   | 1552.678772 | 0.012736  | <a href="#">DGTQCLSGSSDGTR</a> |
| 0.8   | 1552.686142 | 0.005366  | <a href="#">VMDAVMSDGNLETR</a> |

Mascot: <http://www.matrixscience.com/>



# MASCOT Search Results

## Peptide View

MS/MS Fragmentation of **WSSPPQCEGLPCK**

Found in **CFAH\_HUMAN**, Complement factor H OS=Homo sapiens GN=CFH PE=1 SV=4

Match to Query 36842: 1855.836888 from(928.925720,2+) rtinseconds(1938) index(18648)  
 Title: Locus:1.1.1.3240.25 File:"2013-07-02 CLN FXIII 180 min 3rd F 2.wiff"

Data file C:\Program Files (x86)\Matrix Science\Mascot Daemon\mgf9 FXIII 180 min 3rd\mascot\_daemon\_merge.mgf

Click mouse within plot area to zoom in by factor of two about that point

Or, Plot from  to  Da

Label all possible matches  Label matches used for scoring

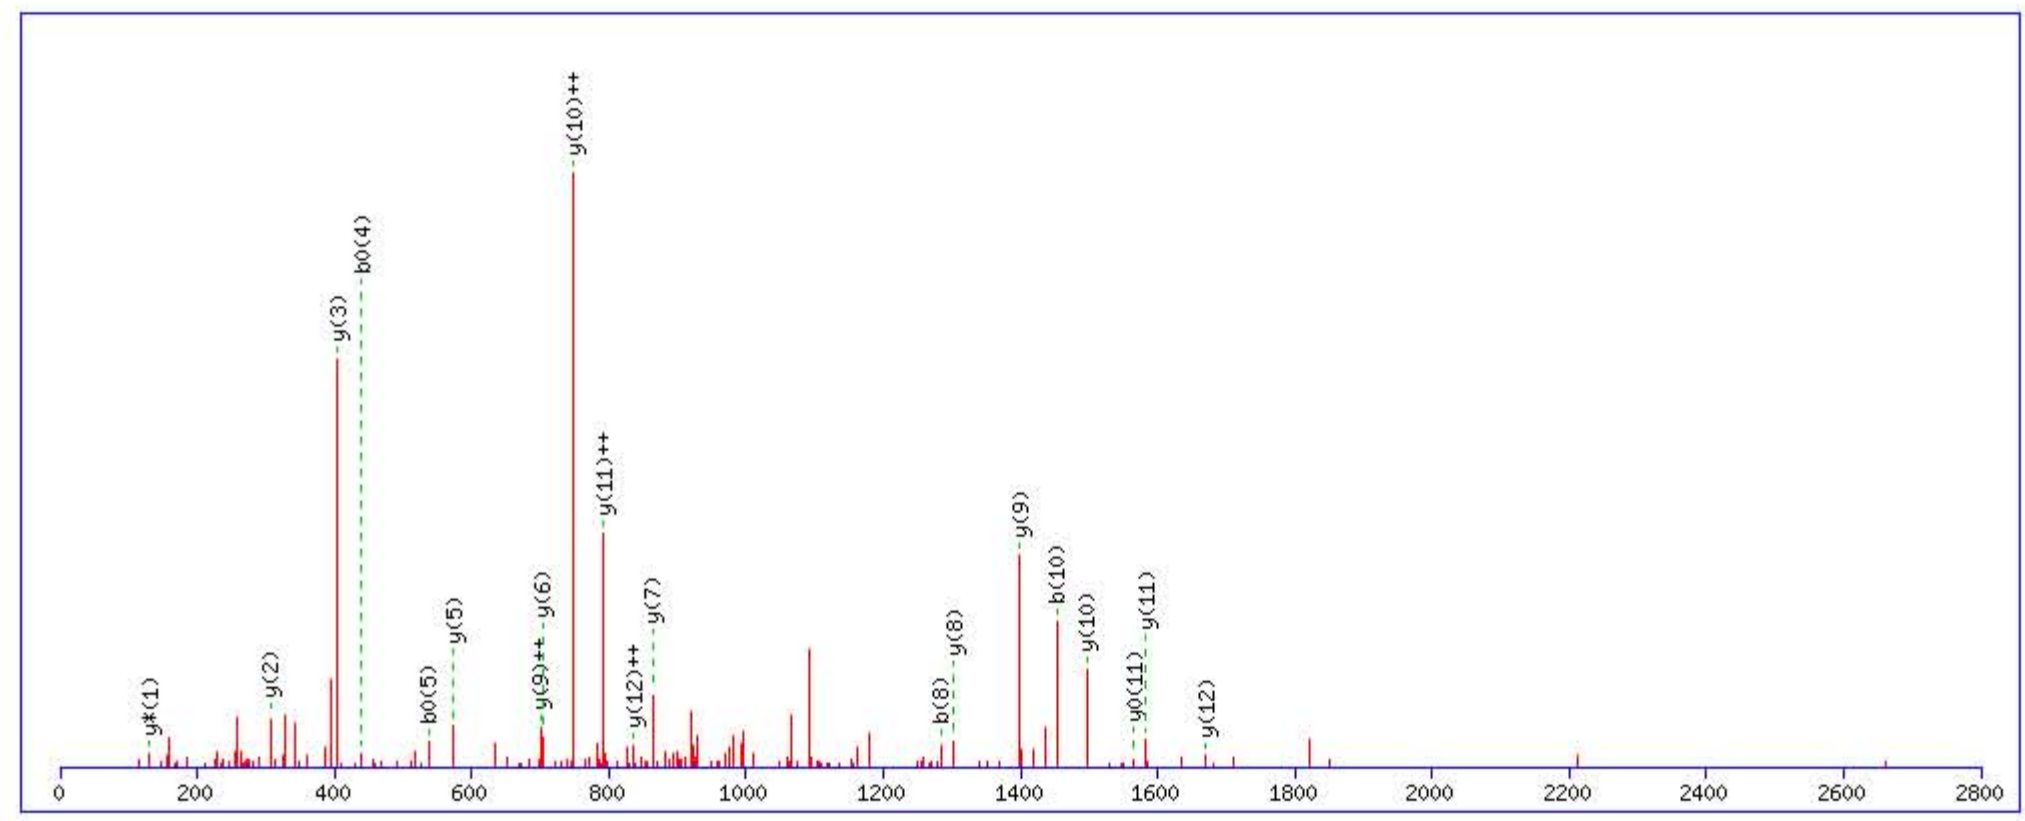

Monoisotopic mass of neutral peptide Mr(calc): 1855.841934

Fixed modifications: Carbamidomethyl (C) (apply to specified residues or termini only)

Variable modifications:

Q6 : Biotin:Thermo-21345 (Q)

Ions Score: 70 Expect: 4.1e-007

Matches : 20/122 fragment ions using 34 most intense peaks [\(help\)](#)

| #  | b           | b <sup>++</sup> | b <sup>*</sup> | b <sup>*++</sup> | b <sup>0</sup> | b <sup>0++</sup> | Seq. | y           | y <sup>++</sup> | y <sup>*</sup> | y <sup>*++</sup> | y <sup>0</sup> | y <sup>0++</sup> | #  |
|----|-------------|-----------------|----------------|------------------|----------------|------------------|------|-------------|-----------------|----------------|------------------|----------------|------------------|----|
| 1  | 187.086589  | 94.046932       |                |                  |                |                  | W    |             |                 |                |                  |                |                  | 13 |
| 2  | 274.118617  | 137.562947      |                |                  | 256.108052     | 128.557664       | S    | 1670.769897 | 835.888587      | 1653.743348    | 827.375312       | 1652.759332    | 826.883304       | 12 |
| 3  | 361.150645  | 181.078960      |                |                  | 343.140080     | 172.073678       | S    | 1583.737869 | 792.372573      | 1566.711320    | 783.859298       | 1565.727304    | 783.367290       | 11 |
| 4  | 458.203409  | 229.605343      |                |                  | 440.192844     | 220.600060       | P    | 1496.705841 | 748.856559      | 1479.679292    | 740.343284       | 1478.695276    | 739.851276       | 10 |
| 5  | 555.256173  | 278.131725      |                |                  | 537.245608     | 269.126442       | P    | 1399.653077 | 700.330177      | 1382.626528    | 691.816902       | 1381.642512    | 691.324894       | 9  |
| 6  | 994.481499  | 497.744388      | 977.454950     | 489.231113       | 976.470934     | 488.739105       | Q    | 1302.600313 | 651.803795      | 1285.573764    | 643.290520       | 1284.589748    | 642.798512       | 8  |
| 7  | 1154.512148 | 577.759712      | 1137.485599    | 569.246438       | 1136.501583    | 568.754430       | C    | 863.374987  | 432.191132      | 846.348438     | 423.677857       | 845.364422     | 423.185849       | 7  |
| 8  | 1283.554741 | 642.281009      | 1266.528192    | 633.767734       | 1265.544176    | 633.275726       | E    | 703.344338  | 352.175807      | 686.317789     | 343.662533       | 685.333773     | 343.170525       | 6  |
| 9  | 1340.576205 | 670.791741      | 1323.549656    | 662.278466       | 1322.565640    | 661.786458       | G    | 574.301745  | 287.654511      | 557.275196     | 279.141236       |                |                  | 5  |
| 10 | 1453.660269 | 727.333773      | 1436.633720    | 718.820498       | 1435.649704    | 718.328490       | L    | 517.280281  | 259.143779      | 500.253732     | 250.630504       |                |                  | 4  |
| 11 | 1550.713033 | 775.860155      | 1533.686484    | 767.346880       | 1532.702468    | 766.854872       | P    | 404.196217  | 202.601747      | 387.169668     | 194.088472       |                |                  | 3  |
| 12 | 1710.743682 | 855.875479      | 1693.717133    | 847.362205       | 1692.733117    | 846.870197       | C    | 307.143453  | 154.075365      | 290.116904     | 145.562090       |                |                  | 2  |
| 13 |             |                 |                |                  |                |                  | K    | 147.112804  | 74.060040       | 130.086255     | 65.546765        |                |                  | 1  |

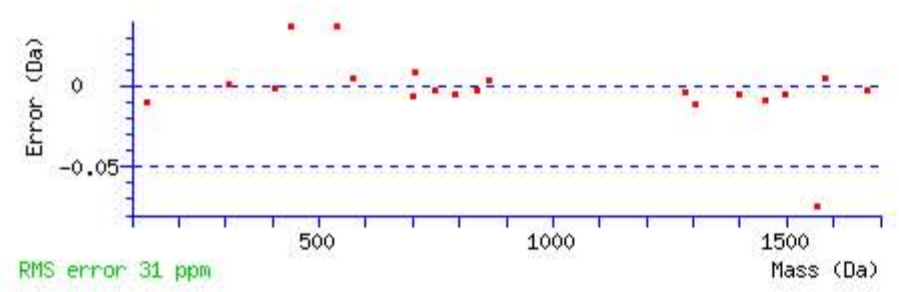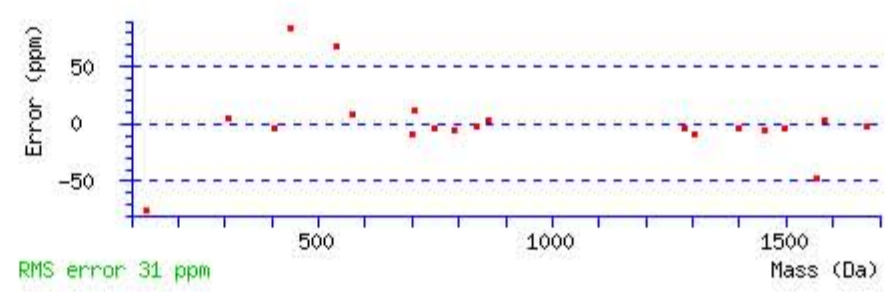

NCBI BLAST search of **WSSPPQCEGLPCK**

(Parameters: blastp, nr protein database, expect=20000, no filter, PAM30)

Other BLAST [web gateways](#)

All matches to this query

| Score | Mr(calc):   | Delta     | Sequence                      |
|-------|-------------|-----------|-------------------------------|
| 70.2  | 1855.841934 | -0.005046 | <a href="#">WSSPPQCEGLPCK</a> |
| 2.1   | 1855.848465 | -0.011577 | <a href="#">FGGQDIFMTEEQK</a> |

# MASCOT SCIENCE Mascot Search Results

## Peptide View

MS/MS Fragmentation of **AGEQVITYTCATYYK**

Found in **CFAH\_HUMAN**, Complement factor H OS=Homo sapiens GN=CFH PE=1 SV=4

Match to Query 38680: 1964.892648 from(983.453600,2+) rtinseconds(1883) index(18173)

Title: Locus:1.1.1.3221.18 File:"2013-07-02 CLN FXIII 180 min 3rd F 2.wiff"

Data file C:\Program Files (x86)\Matrix Science\Mascot Daemon\mgf9 FXIII 180 min 3rd\mascot\_daemon\_merge.mgf

Click mouse within plot area to zoom in by factor of two about that point

Or, Plot from  to  Da

Label all possible matches  Label matches used for scoring

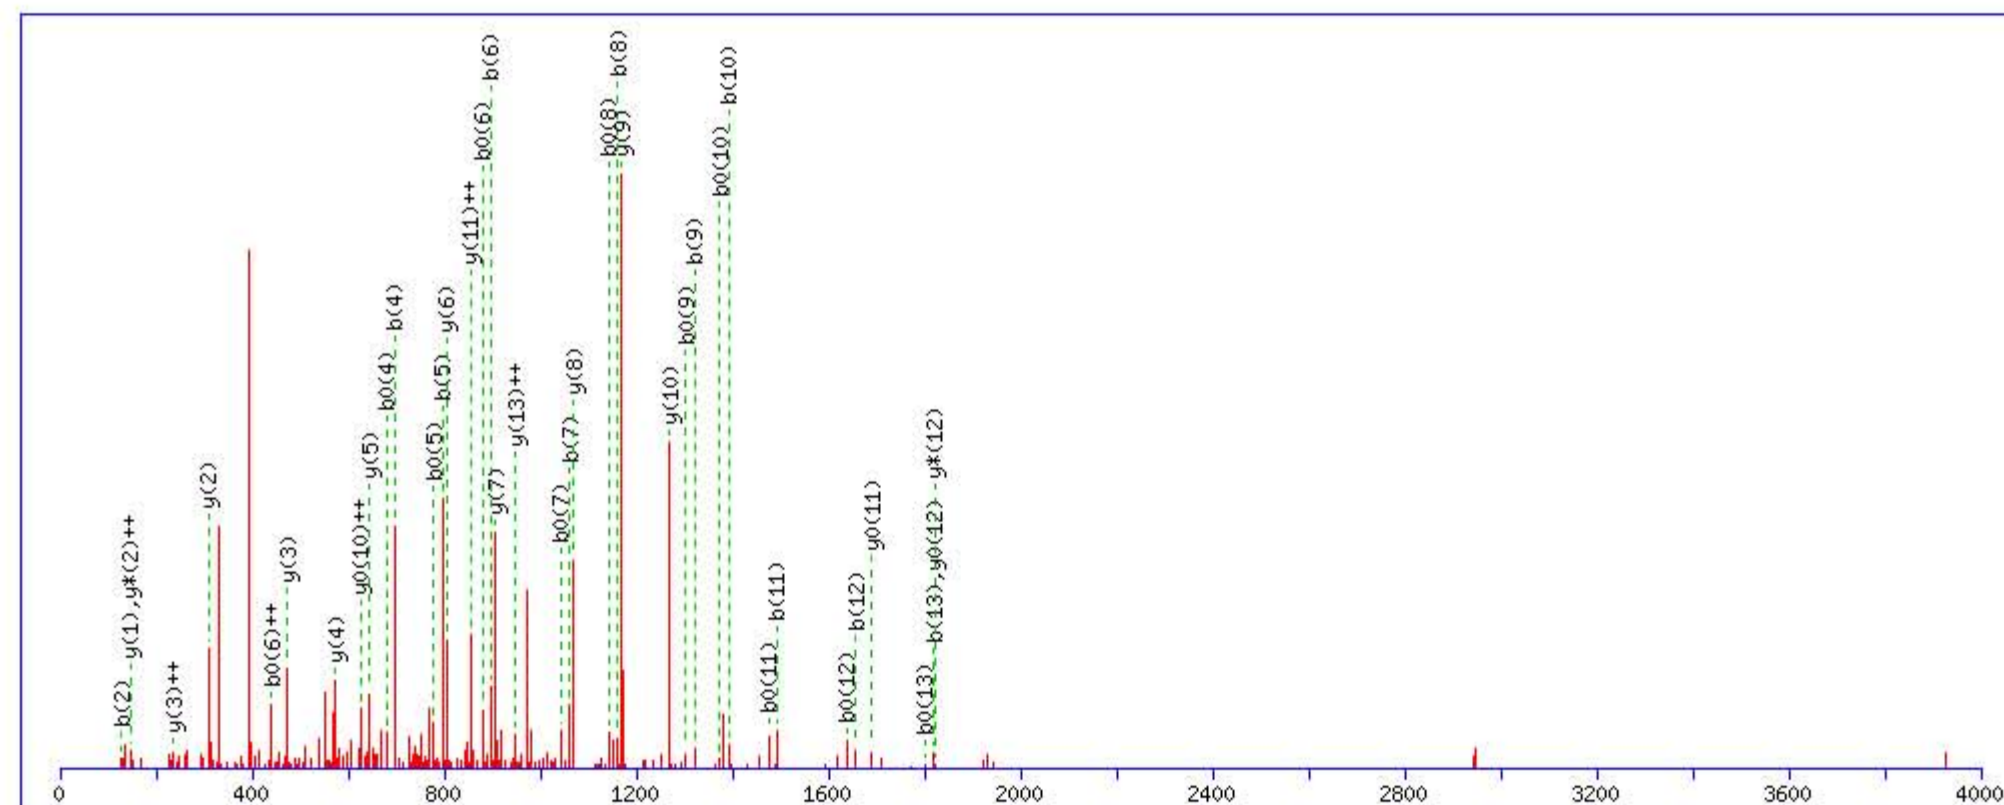

Monoisotopic mass of neutral peptide Mr(calc): 1964.901215

Fixed modifications: Carbamidomethyl (C) (apply to specified residues or termini only)

Variable modifications:

Q4 : Biotin:Thermo-21345 (Q)

Ions Score: 63 Expect: 1.4e-006

Matches : 40/140 fragment ions using 70 most intense peaks [\(help\)](#)

| #  | b                  | b <sup>++</sup> | b <sup>*</sup> | b <sup>+++</sup> | b <sup>0</sup>     | b <sup>0++</sup>  | Seq. | y                  | y <sup>++</sup>   | y <sup>*</sup>     | y <sup>+++</sup>  | y <sup>0</sup>     | y <sup>0++</sup>  | #  |
|----|--------------------|-----------------|----------------|------------------|--------------------|-------------------|------|--------------------|-------------------|--------------------|-------------------|--------------------|-------------------|----|
| 1  | 72.044390          | 36.525833       |                |                  |                    |                   | A    |                    |                   |                    |                   |                    |                   | 14 |
| 2  | <b>129.065854</b>  | 65.036565       |                |                  |                    |                   | G    | 1894.871388        | <b>947.939332</b> | 1877.844839        | 939.426058        | 1876.860823        | 938.934050        | 13 |
| 3  | 258.108447         | 129.557862      |                |                  | 240.097882         | 120.552579        | E    | 1837.849924        | 919.428600        | <b>1820.823375</b> | 910.915326        | <b>1819.839359</b> | 910.423318        | 12 |
| 4  | <b>697.333773</b>  | 349.170525      | 680.307224     | 340.657250       | <b>679.323208</b>  | 340.165242        | Q    | 1708.807331        | <b>854.907304</b> | 1691.780782        | 846.394029        | <b>1690.796766</b> | 845.902021        | 11 |
| 5  | <b>796.402187</b>  | 398.704732      | 779.375638     | 390.191457       | <b>778.391622</b>  | 389.699449        | V    | <b>1269.582005</b> | 635.294641        | 1252.555456        | 626.781366        | 1251.571440        | <b>626.289358</b> | 10 |
| 6  | <b>897.449866</b>  | 449.228571      | 880.423317     | 440.715297       | <b>879.439301</b>  | <b>440.223289</b> | T    | <b>1170.513591</b> | 585.760434        | 1153.487042        | 577.247159        | 1152.503026        | 576.755151        | 9  |
| 7  | <b>1060.513195</b> | 530.760236      | 1043.486646    | 522.246961       | <b>1042.502630</b> | 521.754953        | Y    | <b>1069.465912</b> | 535.236594        | 1052.439363        | 526.723320        | 1051.455347        | 526.231312        | 8  |
| 8  | <b>1161.560874</b> | 581.284075      | 1144.534325    | 572.770801       | <b>1143.550309</b> | 572.278793        | T    | <b>906.402583</b>  | 453.704930        | 889.376034         | 445.191655        | 888.392018         | 444.699647        | 7  |
| 9  | <b>1321.591523</b> | 661.299400      | 1304.564974    | 652.786125       | <b>1303.580958</b> | 652.294117        | C    | <b>805.354904</b>  | 403.181090        | 788.328355         | 394.667816        | 787.344339         | 394.175808        | 6  |
| 10 | <b>1392.628637</b> | 696.817957      | 1375.602088    | 688.304682       | <b>1374.618072</b> | 687.812674        | A    | <b>645.324255</b>  | 323.165766        | 628.297706         | 314.652491        | 627.313690         | 314.160483        | 5  |
| 11 | <b>1493.676316</b> | 747.341796      | 1476.649767    | 738.828522       | <b>1475.665751</b> | 738.336514        | T    | <b>574.287141</b>  | 287.647209        | 557.260592         | 279.133934        | 556.276576         | 278.641926        | 4  |
| 12 | <b>1656.739645</b> | 828.873461      | 1639.713096    | 820.360186       | <b>1638.729080</b> | 819.868178        | Y    | <b>473.239462</b>  | <b>237.123369</b> | 456.212913         | 228.610095        |                    |                   | 3  |
| 13 | <b>1819.802974</b> | 910.405125      | 1802.776425    | 901.891851       | <b>1801.792409</b> | 901.399843        | Y    | <b>310.176133</b>  | 155.591705        | 293.149584         | <b>147.078430</b> |                    |                   | 2  |
| 14 |                    |                 |                |                  |                    |                   | K    | <b>147.112804</b>  | 74.060040         | 130.086255         | 65.546765         |                    |                   | 1  |

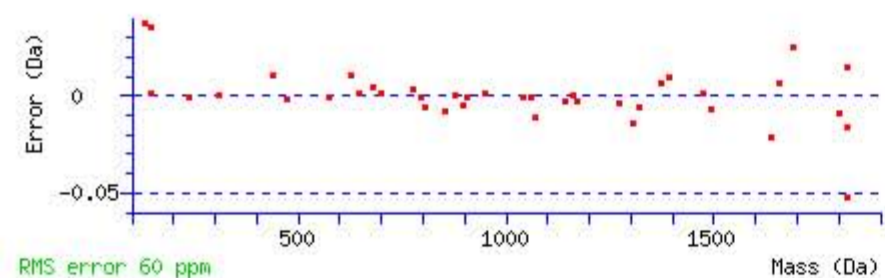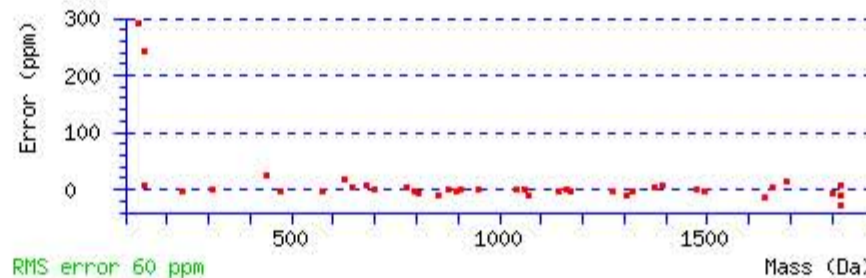

NCBI BLAST search of **AGEQVITYTCATYYK**

(Parameters: blastp, nr protein database, expect=20000, no filter, PAM30)

Other BLAST [web gateways](#)

All matches to this query

| Score | Mr(calc):   | Delta     | Sequence                           |
|-------|-------------|-----------|------------------------------------|
| 63.2  | 1964.901215 | -0.008567 | <a href="#">AGEQVITYTCATYYK</a>    |
| 0.8   | 1964.883255 | 0.009393  | <a href="#">RTHSGEKPYECKECKGK</a>  |
| 0.1   | 1964.900574 | -0.007926 | <a href="#">YCSTSLVKCASGTMGSIK</a> |

Mascot: <http://www.matrixscience.com/>

# MASCOT Search Results

## Peptide View

MS/MS Fragmentation of **DTSCVNPPTVQNAYIVSR**

Found in **CFAH\_HUMAN**, Complement factor H OS=Homo sapiens GN=CFH PE=1 SV=4

Match to Query 45637: 2331.139992 from(778.053940,3+) rtinseconds(2131) index(19801)

Title: Locus:1.1.1.3307.5 File:"2013-07-02 CLN FXIII 180 min 3rd F 2.wiff"

Data file C:\Program Files (x86)\Matrix Science\Mascot Daemon\mgf9 FXIII 180 min 3rd\mascot\_daemon\_merge.mgf

Click mouse within plot area to zoom in by factor of two about that point

Or, Plot from  to  Da

Label all possible matches  Label matches used for scoring

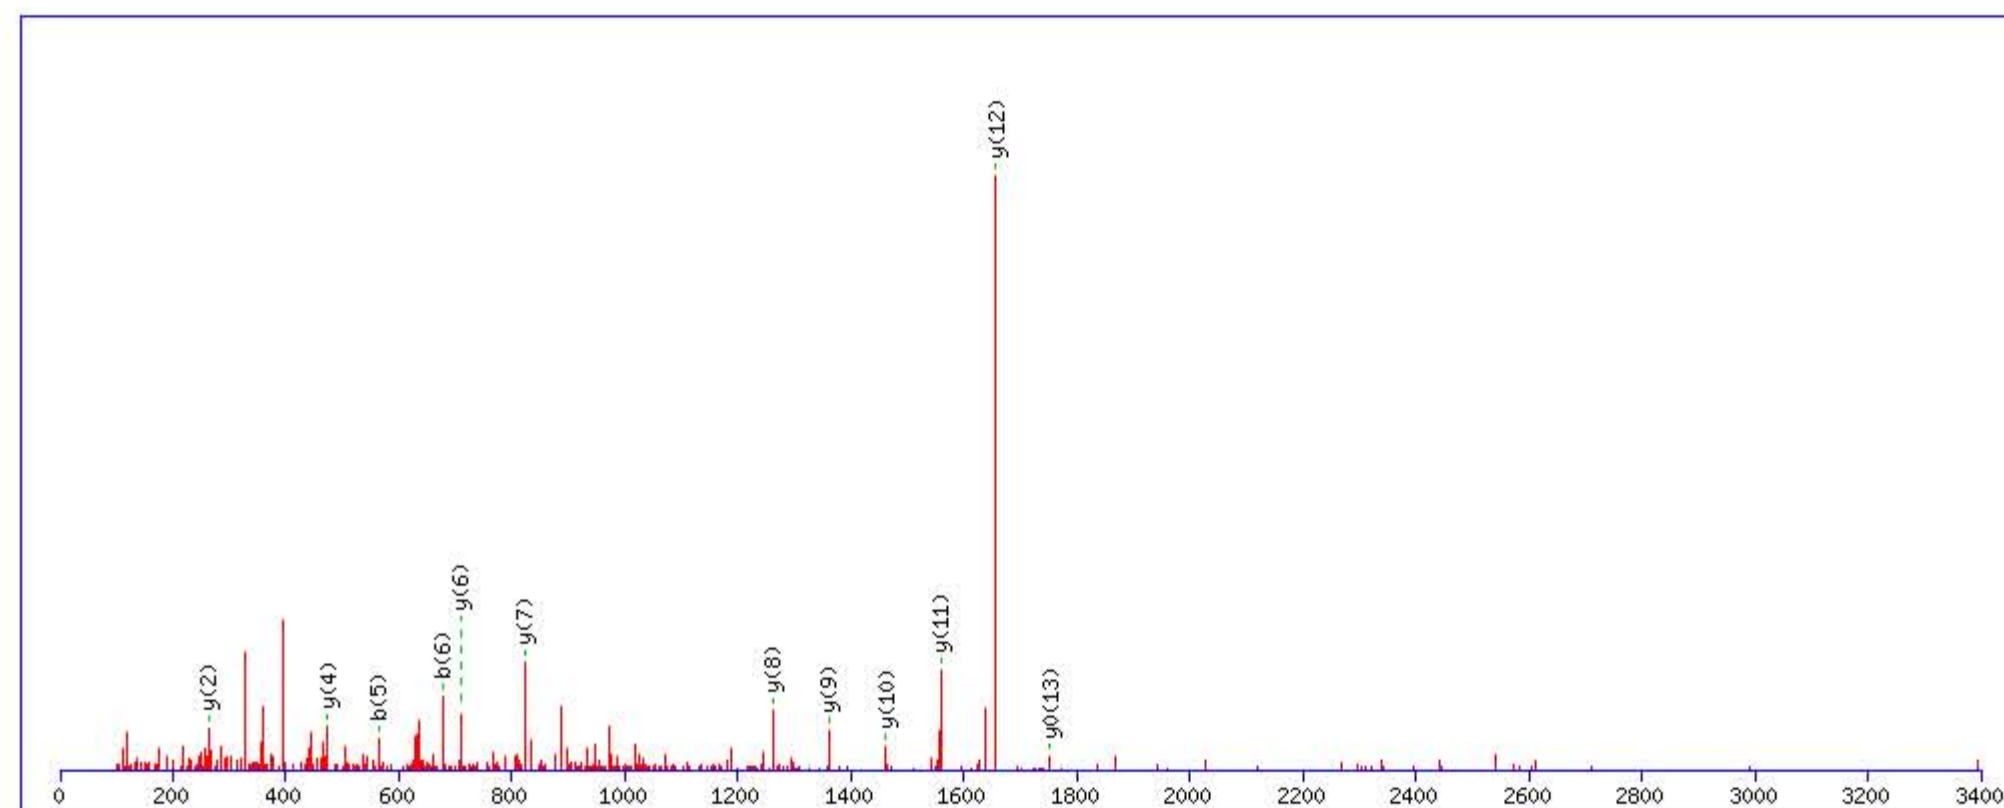

Monoisotopic mass of neutral peptide Mr(calc): 2331.135147

Fixed modifications: Carbamidomethyl (C) (apply to specified residues or termini only)

Variable modifications:

Q11 : Biotin:Thermo-21345 (Q)

Ions Score: 49 Expect: 0.00029

Matches : 12/192 fragment ions using 23 most intense peaks [\(help\)](#)

| #  | b                 | b <sup>++</sup> | b <sup>*</sup> | b <sup>***</sup> | b <sup>0</sup> | b <sup>0++</sup> | Seq. | y                  | y <sup>++</sup> | y <sup>*</sup> | y <sup>***</sup> | y <sup>0</sup>     | y <sup>0++</sup> | #  |
|----|-------------------|-----------------|----------------|------------------|----------------|------------------|------|--------------------|-----------------|----------------|------------------|--------------------|------------------|----|
| 1  | 116.034219        | 58.520748       |                |                  | 98.023654      | 49.515465        | D    |                    |                 |                |                  |                    |                  | 18 |
| 2  | 217.081898        | 109.044587      |                |                  | 199.071333     | 100.039304       | T    | 2217.115472        | 1109.061374     | 2200.088923    | 1100.548099      | 2199.104907        | 1100.056091      | 17 |
| 3  | 304.113926        | 152.560601      |                |                  | 286.103361     | 143.555319       | S    | 2116.067793        | 1058.537534     | 2099.041244    | 1050.024260      | 2098.057228        | 1049.532252      | 16 |
| 4  | 464.144575        | 232.575925      |                |                  | 446.134010     | 223.570643       | C    | 2029.035765        | 1015.021521     | 2012.009216    | 1006.508246      | 2011.025200        | 1006.016238      | 15 |
| 5  | <b>563.212989</b> | 282.110133      |                |                  | 545.202424     | 273.104850       | V    | 1869.005116        | 935.006196      | 1851.978567    | 926.492922       | 1850.994551        | 926.000914       | 14 |
| 6  | <b>677.255916</b> | 339.131596      | 660.229367     | 330.618321       | 659.245351     | 330.126313       | N    | 1769.936702        | 885.471989      | 1752.910153    | 876.958715       | <b>1751.926137</b> | 876.466707       | 13 |
| 7  | 774.308680        | 387.657978      | 757.282131     | 379.144703       | 756.298115     | 378.652695       | P    | <b>1655.893775</b> | 828.450526      | 1638.867226    | 819.937251       | 1637.883210        | 819.445243       | 12 |
| 8  | 871.361444        | 436.184360      | 854.334895     | 427.671086       | 853.350879     | 427.179078       | P    | <b>1558.841011</b> | 779.924144      | 1541.814462    | 771.410869       | 1540.830446        | 770.918861       | 11 |
| 9  | 972.409123        | 486.708200      | 955.382574     | 478.194925       | 954.398558     | 477.702917       | T    | <b>1461.788247</b> | 731.397762      | 1444.761698    | 722.884487       | 1443.777682        | 722.392479       | 10 |
| 10 | 1071.477537       | 536.242407      | 1054.450988    | 527.729132       | 1053.466972    | 527.237124       | V    | <b>1360.740568</b> | 680.873922      | 1343.714019    | 672.360648       | 1342.730003        | 671.868639       | 9  |
| 11 | 1510.702863       | 755.855070      | 1493.676314    | 747.341795       | 1492.692298    | 746.849787       | Q    | <b>1261.672154</b> | 631.339715      | 1244.645605    | 622.826441       | 1243.661589        | 622.334433       | 8  |
| 12 | 1624.745790       | 812.876533      | 1607.719241    | 804.363259       | 1606.735225    | 803.871251       | N    | <b>822.446828</b>  | 411.727052      | 805.420279     | 403.213777       | 804.436263         | 402.721769       | 7  |
| 13 | 1695.782904       | 848.395090      | 1678.756355    | 839.881816       | 1677.772339    | 839.389808       | A    | <b>708.403901</b>  | 354.705588      | 691.377352     | 346.192314       | 690.393336         | 345.700306       | 6  |
| 14 | 1858.846233       | 929.926755      | 1841.819684    | 921.413480       | 1840.835668    | 920.921472       | Y    | 637.366787         | 319.187031      | 620.340238     | 310.673757       | 619.356222         | 310.181749       | 5  |
| 15 | 1971.930297       | 986.468787      | 1954.903748    | 977.955512       | 1953.919732    | 977.463504       | I    | <b>474.303458</b>  | 237.655367      | 457.276909     | 229.142092       | 456.292893         | 228.650084       | 4  |
| 16 | 2070.998711       | 1036.002993     | 2053.972162    | 1027.489719      | 2052.988146    | 1026.997711      | V    | 361.219394         | 181.113335      | 344.192845     | 172.600060       | 343.208829         | 172.108052       | 3  |
| 17 | 2158.030739       | 1079.519007     | 2141.004190    | 1071.005733      | 2140.020174    | 1070.513725      | S    | <b>262.150980</b>  | 131.579128      | 245.124431     | 123.065854       | 244.140415         | 122.573846       | 2  |
| 18 |                   |                 |                |                  |                |                  | R    | 175.118952         | 88.063114       | 158.092403     | 79.549839        |                    |                  | 1  |

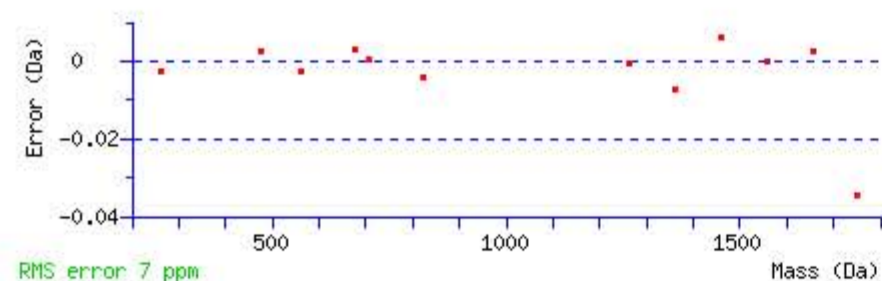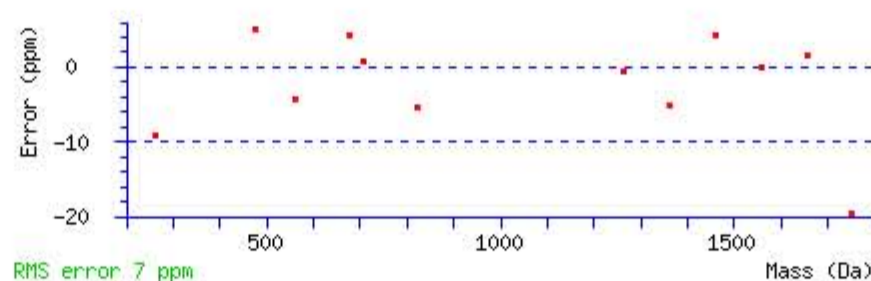

NCBI BLAST search of [DTSCVNPPTVQNAYIVSR](#)

(Parameters: blastp, nr protein database, expect=20000, no filter, PAM30)

Other BLAST [web gateways](#)

All matches to this query

| Score | Mr(calc):   | Delta    | Sequence                           |
|-------|-------------|----------|------------------------------------|
| 49.2  | 2331.135147 | 0.004845 | <a href="#">DTSCVNPPTVQNAYIVSR</a> |

Mascot: <http://www.matrixscience.com/>

# MASCOT Search Results

## Peptide View

MS/MS Fragmentation of **AVYTCNEGYQLLGEINYS**  
 Found in **CFAH\_HUMAN**, Complement factor H OS=Homo sapiens GN=CFH PE=1 SV=4

Match to Query 47783: 2473.193352 from(825.405060,3+) rtinseconds(2558) index(22076)  
 Title: Locus:1.1.1.3456.8 File:"2013-07-02 CLN FXIII 180 min 3rd F 2.wiff"  
 Data file C:\Program Files (x86)\Matrix Science\Mascot Daemon\mgf9 FXIII 180 min 3rd\mascot\_daemon\_merge.mgf

Click mouse within plot area to zoom in by factor of two about that point  
 Or, Plot from  to  Da   
 Label all possible matches  Label matches used for scoring

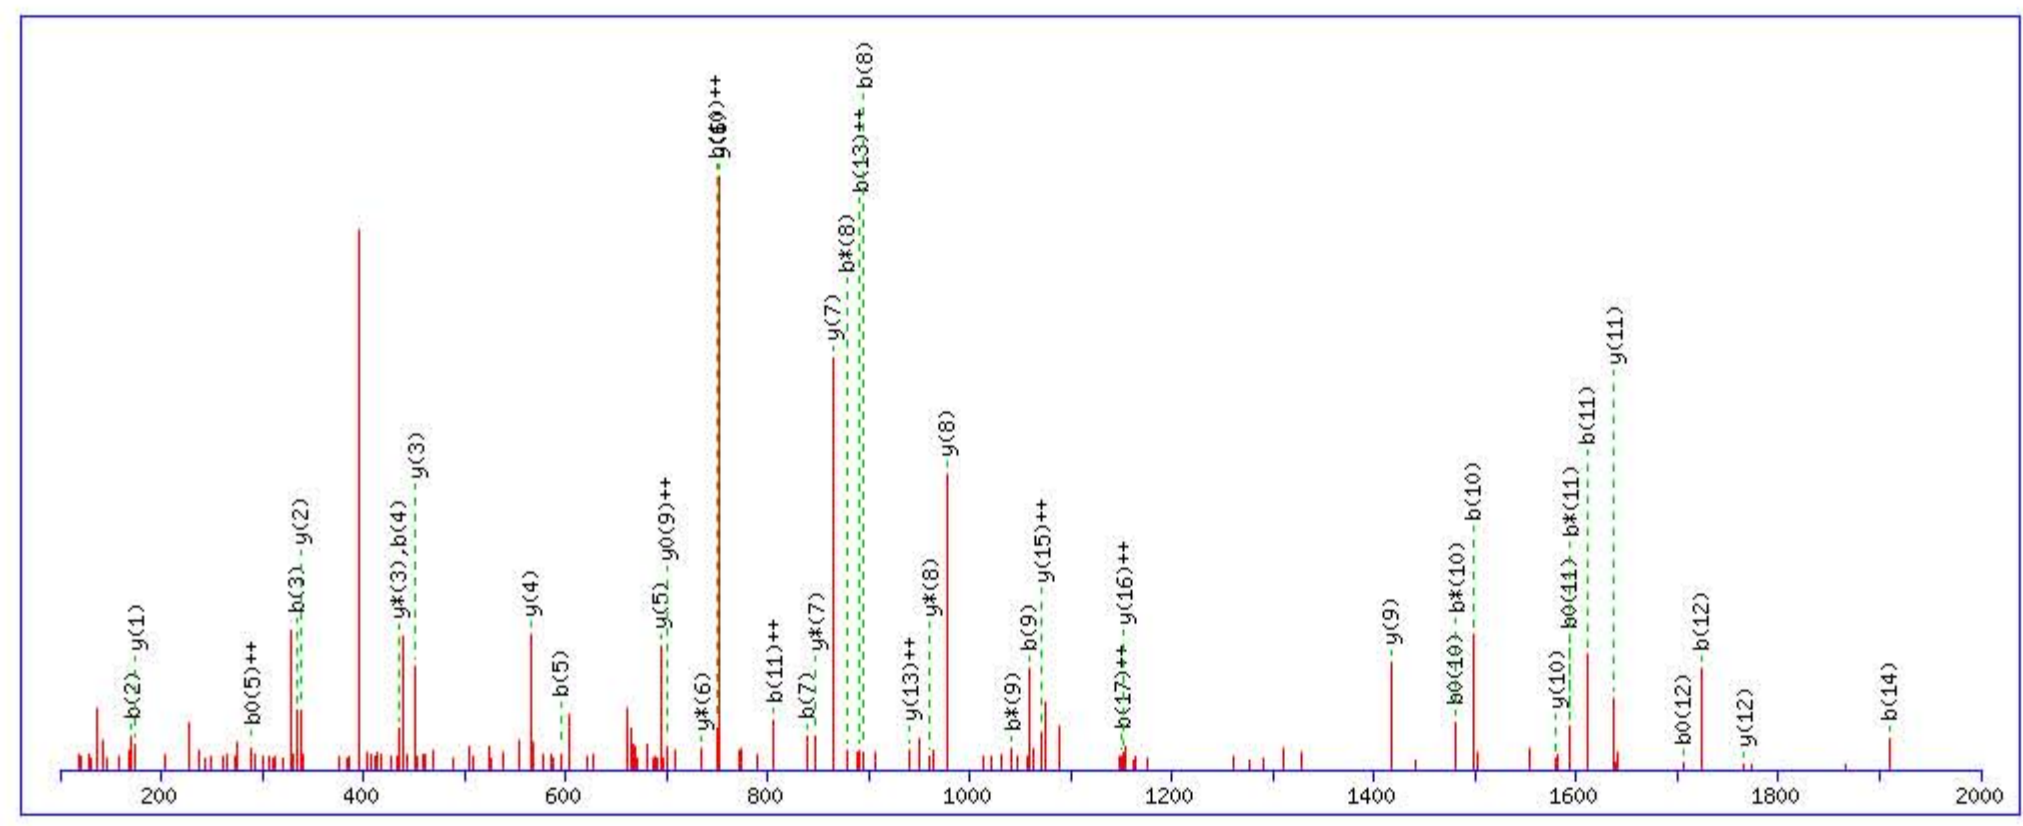

Monoisotopic mass of neutral peptide Mr(calc): 2473.176971  
 Fixed modifications: Carbamidomethyl (C) (apply to specified residues or termini only)  
 Variable modifications:  
 Q10 : Biotin:Thermo-21345 (Q)  
 Ions Score: 52 Expect: 0.00017  
 Matches : 43/180 fragment ions using 104 most intense peaks [\(help\)](#)

| #  | b                  | b <sup>++</sup>    | b <sup>*</sup>     | b <sup>+++</sup> | b <sup>0</sup>     | b <sup>0++</sup>  | Seq. | y                  | y <sup>++</sup>    | y <sup>*</sup>    | y <sup>+++</sup> | y <sup>0</sup> | y <sup>0++</sup>  | #  |
|----|--------------------|--------------------|--------------------|------------------|--------------------|-------------------|------|--------------------|--------------------|-------------------|------------------|----------------|-------------------|----|
| 1  | 72.044390          | 36.525833          |                    |                  |                    |                   | A    |                    |                    |                   |                  |                |                   | 18 |
| 2  | <b>171.112804</b>  | 86.060040          |                    |                  |                    |                   | V    | 2403.147167        | 1202.077221        | 2386.120618       | 1193.563947      | 2385.136602    | 1193.071939       | 17 |
| 3  | <b>334.176133</b>  | 167.591704         |                    |                  |                    |                   | Y    | 2304.078753        | <b>1152.543014</b> | 2287.052204       | 1144.029740      | 2286.068188    | 1143.537732       | 16 |
| 4  | <b>435.223812</b>  | 218.115544         |                    |                  | 417.213247         | 209.110262        | T    | 2141.015424        | <b>1071.011350</b> | 2123.988875       | 1062.498075      | 2123.004859    | 1062.006067       | 15 |
| 5  | <b>595.254461</b>  | 298.130869         |                    |                  | 577.243896         | <b>289.125586</b> | C    | 2039.967745        | 1020.487511        | 2022.941196       | 1011.974236      | 2021.957180    | 1011.482228       | 14 |
| 6  | 709.297388         | 355.152332         | 692.270839         | 346.639058       | 691.286823         | 346.147050        | N    | 1879.937096        | <b>940.472186</b>  | 1862.910547       | 931.958912       | 1861.926531    | 931.466903        | 13 |
| 7  | <b>838.339981</b>  | 419.673629         | 821.313432         | 411.160354       | 820.329416         | 410.668346        | E    | <b>1765.894169</b> | 883.450722         | 1748.867620       | 874.937448       | 1747.883604    | 874.445440        | 12 |
| 8  | <b>895.361445</b>  | 448.184361         | <b>878.334896</b>  | 439.671086       | 877.350880         | 439.179078        | G    | <b>1636.851576</b> | 818.929426         | 1619.825027       | 810.416152       | 1618.841011    | 809.924144        | 11 |
| 9  | <b>1058.424774</b> | 529.716025         | <b>1041.398225</b> | 521.202751       | 1040.414209        | 520.710743        | Y    | <b>1579.830112</b> | 790.418694         | 1562.803563       | 781.905419       | 1561.819547    | 781.413411        | 10 |
| 10 | <b>1497.650100</b> | <b>749.328688</b>  | <b>1480.623551</b> | 740.815414       | <b>1479.639535</b> | 740.323406        | Q    | <b>1416.766783</b> | 708.887030         | 1399.740234       | 700.373755       | 1398.756218    | <b>699.881747</b> | 9  |
| 11 | <b>1610.734164</b> | <b>805.870720</b>  | <b>1593.707615</b> | 797.357446       | <b>1592.723599</b> | 796.865437        | L    | <b>977.541457</b>  | 489.274367         | <b>960.514908</b> | 480.761092       | 959.530892     | 480.269084        | 8  |
| 12 | <b>1723.818228</b> | 862.412752         | 1706.791679        | 853.899477       | <b>1705.807663</b> | 853.407469        | L    | <b>864.457393</b>  | 432.732335         | <b>847.430844</b> | 424.219060       | 846.446828     | 423.727052        | 7  |
| 13 | 1780.839692        | <b>890.923484</b>  | 1763.813143        | 882.410209       | 1762.829127        | 881.918201        | G    | <b>751.373329</b>  | 376.190303         | <b>734.346780</b> | 367.677028       | 733.362764     | 367.185020        | 6  |
| 14 | <b>1909.882285</b> | 955.444780         | 1892.855736        | 946.931506       | 1891.871720        | 946.439498        | E    | <b>694.351865</b>  | 347.679571         | 677.325316        | 339.166296       | 676.341300     | 338.674288        | 5  |
| 15 | 2022.966349        | 1011.986812        | 2005.939800        | 1003.473538      | 2004.955784        | 1002.981530       | I    | <b>565.309272</b>  | 283.158274         | 548.282723        | 274.645000       |                |                   | 4  |
| 16 | 2137.009276        | 1069.008276        | 2119.982727        | 1060.495001      | 2118.998711        | 1060.002993       | N    | <b>452.225208</b>  | 226.616242         | <b>435.198659</b> | 218.102968       |                |                   | 3  |
| 17 | 2300.072605        | <b>1150.539940</b> | 2283.046056        | 1142.026666      | 2282.062040        | 1141.534658       | Y    | <b>338.182281</b>  | 169.594778         | 321.155732        | 161.081504       |                |                   | 2  |
| 18 |                    |                    |                    |                  |                    |                   | R    | <b>175.118952</b>  | 88.063114          | 158.092403        | 79.549839        |                |                   | 1  |

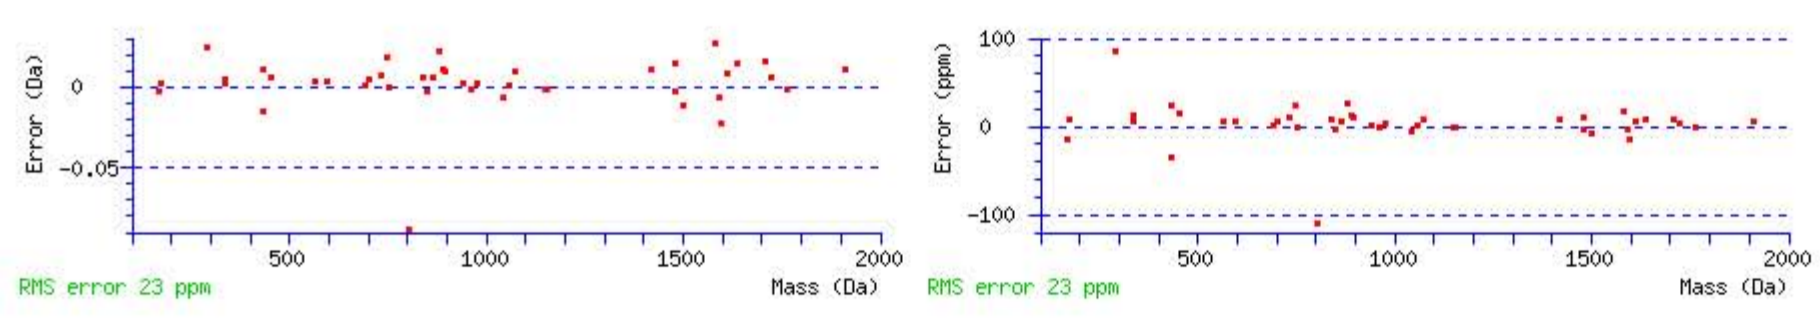

NCBI BLAST search of **AVYTCNEGYQLLGEINYS**  
 (Parameters: blastp, nr protein database, expect=20000, no filter, PAM30)  
 Other BLAST [web gateways](#)

### All matches to this query

| Score | Mr(calc):   | Delta    | Sequence                           |
|-------|-------------|----------|------------------------------------|
| 51.6  | 2473.176971 | 0.016381 | <a href="#">AVYTCNEGYQLLGEINYS</a> |

# MASCOT Search Results

## Peptide View

MS/MS Fragmentation of **IVSSAMEPDREYHFGQAVR**

Found in **CFAH\_HUMAN**, Complement factor H OS=Homo sapiens GN=CFH PE=1 SV=4

Match to Query 48527: 2502.207656 from(626.559190,4+) rtinseconds(1864) index(18070)

Title: Locus:1.1.1.3215.4 File:"2013-07-02 CLN FXIII 180 min 3rd F 2.wiff"

Data file C:\Program Files (x86)\Matrix Science\Mascot Daemon\mgf\9 FXIII 180 min 3rd\mascot\_daemon\_merge.mgf

Click mouse within plot area to zoom in by factor of two about that point

Or, Plot from  to  Da

Label all possible matches  Label matches used for scoring

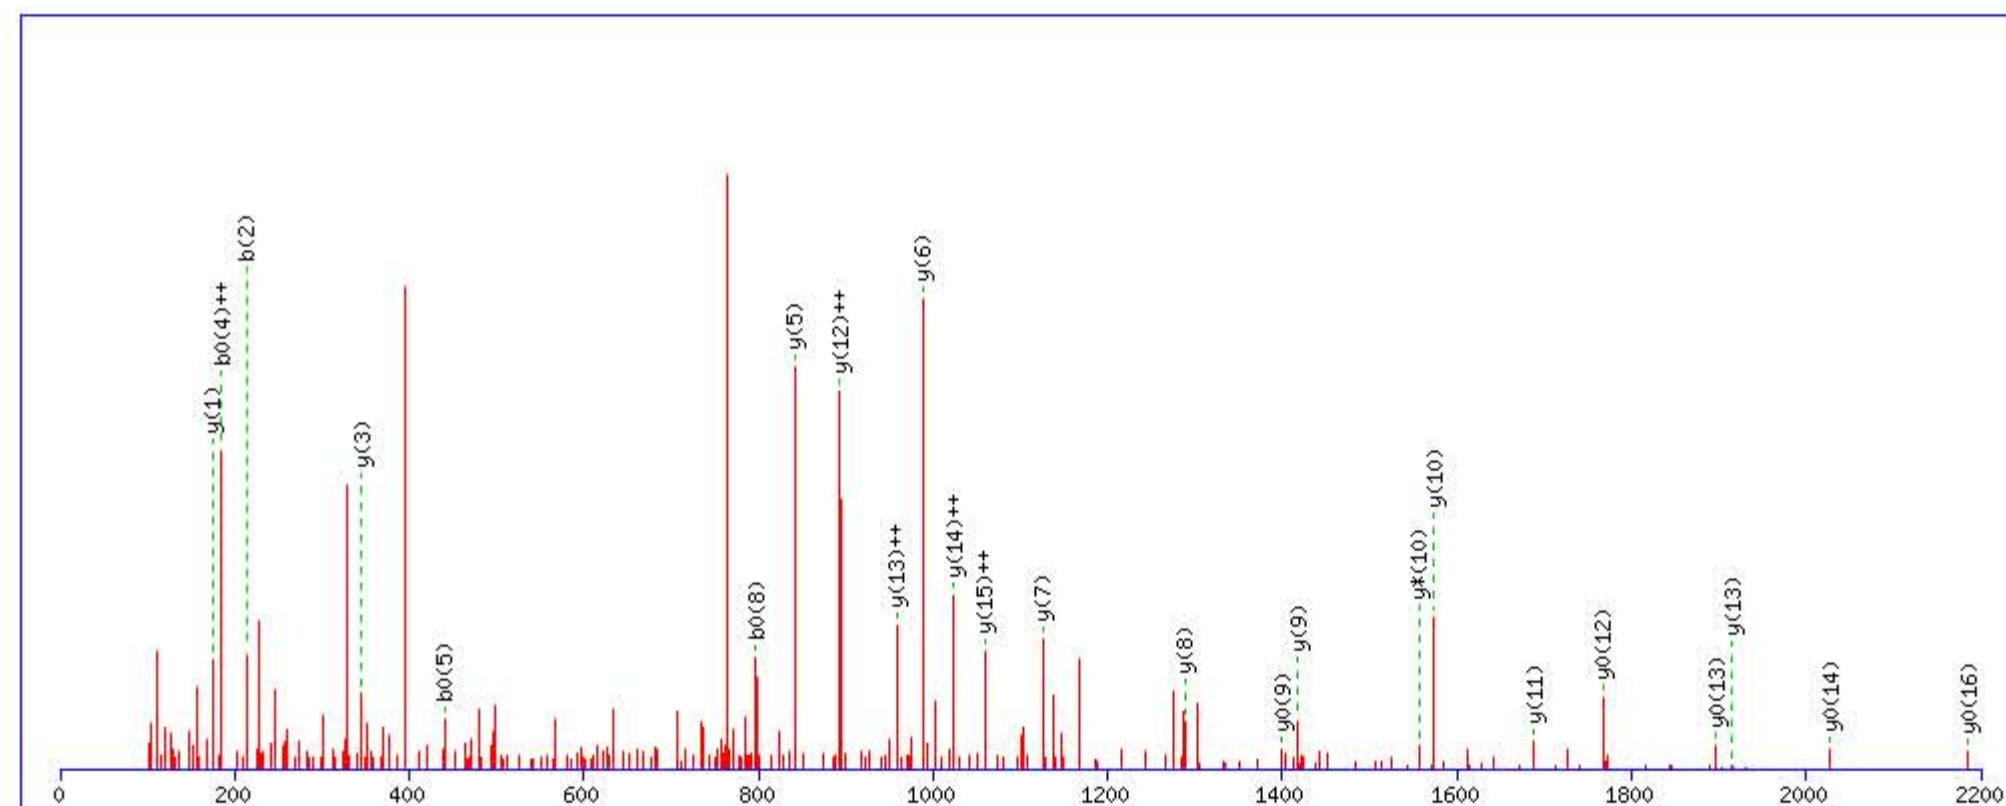

Monoisotopic mass of neutral peptide Mr(calc): 2502.214767

Fixed modifications: Carbamidomethyl (C) (apply to specified residues or termini only)

Variable modifications:

Q16 : Biotin:Thermo-21345 (Q)

Ions Score: 30 Expect: 0.021

Matches : 24/178 fragment ions using 59 most intense peaks [\(help\)](#)

| #  | b                 | b <sup>++</sup> | b <sup>+</sup> | b <sup>+++</sup> | b <sup>0</sup>    | b <sup>0++</sup>  | Seq. | y                  | y <sup>++</sup>    | y <sup>+</sup>     | y <sup>+++</sup> | y <sup>0</sup>     | y <sup>0++</sup> | #  |
|----|-------------------|-----------------|----------------|------------------|-------------------|-------------------|------|--------------------|--------------------|--------------------|------------------|--------------------|------------------|----|
| 1  | 114.091340        | 57.549308       |                |                  |                   |                   | I    |                    |                    |                    |                  |                    |                  | 19 |
| 2  | <b>213.159754</b> | 107.083515      |                |                  |                   |                   | V    | 2390.137998        | 1195.572637        | 2373.111449        | 1187.059362      | 2372.127433        | 1186.567354      | 18 |
| 3  | 300.191782        | 150.599529      |                |                  | 282.181217        | 141.594247        | S    | 2291.069584        | 1146.038430        | 2274.043035        | 1137.525155      | 2273.059019        | 1137.033147      | 17 |
| 4  | 387.223810        | 194.115543      |                |                  | 369.213245        | <b>185.110261</b> | S    | 2204.037556        | 1102.522416        | 2187.011007        | 1094.009141      | <b>2186.026991</b> | 1093.517133      | 16 |
| 5  | 458.260924        | 229.634100      |                |                  | <b>440.250359</b> | 220.628818        | A    | 2117.005528        | <b>1059.006402</b> | 2099.978979        | 1050.493127      | 2098.994963        | 1050.001119      | 15 |
| 6  | 589.301409        | 295.154343      |                |                  | 571.290844        | 286.149060        | M    | 2045.968414        | <b>1023.487845</b> | 2028.941865        | 1014.974571      | <b>2027.957849</b> | 1014.482563      | 14 |
| 7  | 718.344002        | 359.675639      |                |                  | 700.333437        | 350.670357        | E    | <b>1914.927929</b> | <b>957.967603</b>  | 1897.901380        | 949.454328       | <b>1896.917364</b> | 948.962320       | 13 |
| 8  | 815.396766        | 408.202021      |                |                  | <b>797.386201</b> | 399.196739        | P    | 1785.885336        | <b>893.446306</b>  | 1768.858787        | 884.933032       | <b>1767.874771</b> | 884.441024       | 12 |
| 9  | 930.423709        | 465.715493      |                |                  | 912.413144        | 456.710210        | D    | <b>1688.832572</b> | 844.919924         | 1671.806023        | 836.406650       | 1670.822007        | 835.914642       | 11 |
| 10 | 1086.524820       | 543.766048      | 1069.498271    | 535.252774       | 1068.514255       | 534.760766        | R    | <b>1573.805629</b> | 787.406453         | <b>1556.779080</b> | 778.893178       | 1555.795064        | 778.401170       | 10 |
| 11 | 1215.567413       | 608.287345      | 1198.540864    | 599.774070       | 1197.556848       | 599.282062        | E    | <b>1417.704518</b> | 709.355897         | 1400.677969        | 700.842623       | <b>1399.693953</b> | 700.350615       | 9  |
| 12 | 1378.630742       | 689.819009      | 1361.604193    | 681.305735       | 1360.620177       | 680.813727        | Y    | <b>1288.661925</b> | 644.834601         | 1271.635376        | 636.321326       |                    |                  | 8  |
| 13 | 1515.689654       | 758.348465      | 1498.663105    | 749.835191       | 1497.679089       | 749.343183        | H    | <b>1125.598596</b> | 563.302936         | 1108.572047        | 554.789662       |                    |                  | 7  |
| 14 | 1662.758068       | 831.882672      | 1645.731519    | 823.369398       | 1644.747503       | 822.877390        | F    | <b>988.539684</b>  | 494.773480         | 971.513135         | 486.260206       |                    |                  | 6  |
| 15 | 1719.779532       | 860.393404      | 1702.752983    | 851.880130       | 1701.768967       | 851.388122        | G    | <b>841.471270</b>  | 421.239273         | 824.444721         | 412.725999       |                    |                  | 5  |
| 16 | 2159.004858       | 1080.006067     | 2141.978309    | 1071.492792      | 2140.994293       | 1071.000784       | Q    | 784.449806         | 392.728541         | 767.423257         | 384.215267       |                    |                  | 4  |
| 17 | 2230.041972       | 1115.524624     | 2213.015423    | 1107.011349      | 2212.031407       | 1106.519341       | A    | <b>345.224480</b>  | 173.115878         | 328.197931         | 164.602603       |                    |                  | 3  |
| 18 | 2329.110386       | 1165.058831     | 2312.083837    | 1156.545556      | 2311.099821       | 1156.053548       | V    | 274.187366         | 137.597321         | 257.160817         | 129.084046       |                    |                  | 2  |
| 19 |                   |                 |                |                  |                   |                   | R    | <b>175.118952</b>  | 88.063114          | 158.092403         | 79.549839        |                    |                  | 1  |

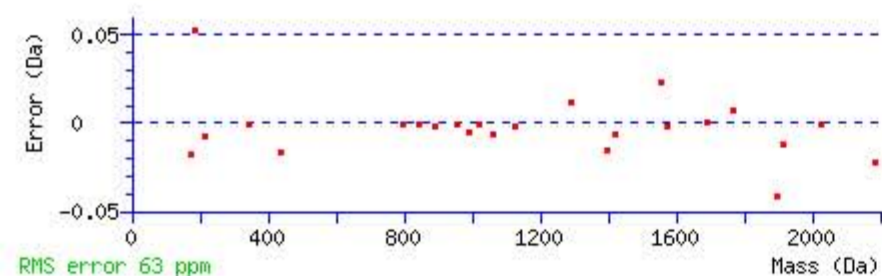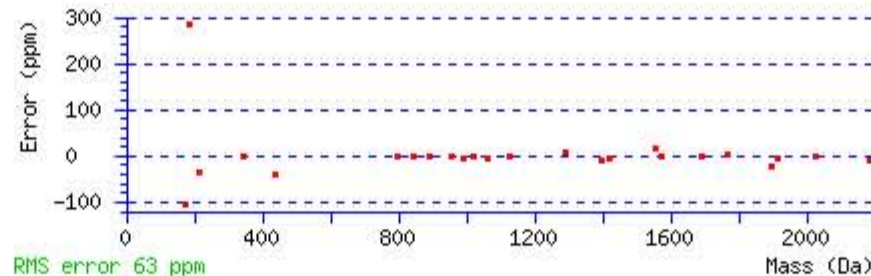

NCBI BLAST search of **IVSSAMEPDREYHFGQAVR**

(Parameters: blastp, nr protein database, expect=20000, no filter, PAM30)

Other BLAST [web gateways](#)

All matches to this query

| Score | Mr(calc):   | Delta     | Sequence                            |
|-------|-------------|-----------|-------------------------------------|
| 30.1  | 2502.214767 | -0.007111 | <a href="#">IVSSAMEPDREYHFGQAVR</a> |

Mascot: <http://www.matrixscience.com/>

# MASCOT Search Results

## Peptide View

MS/MS Fragmentation of **SITCIHGVWTQLPQCVAIDK**

Found in **CFAH\_HUMAN**, Complement factor H OS=Homo sapiens GN=CFH PE=1 SV=4

Match to Query 49829: 2636.335062 from(879.785630,3+) rtinseconds(2386) index(21131)

Title: Locus:1.1.1.3396.14 File:"2013-07-02 CLN FXIII 180 min 3rd F 2.wiff"

Data file C:\Program Files (x86)\Matrix Science\Mascot Daemon\mgf9 FXIII 180 min 3rd\mascot\_daemon\_merge.mgf

Click mouse within plot area to zoom in by factor of two about that point

Or, Plot from  to  Da

Label all possible matches  Label matches used for scoring

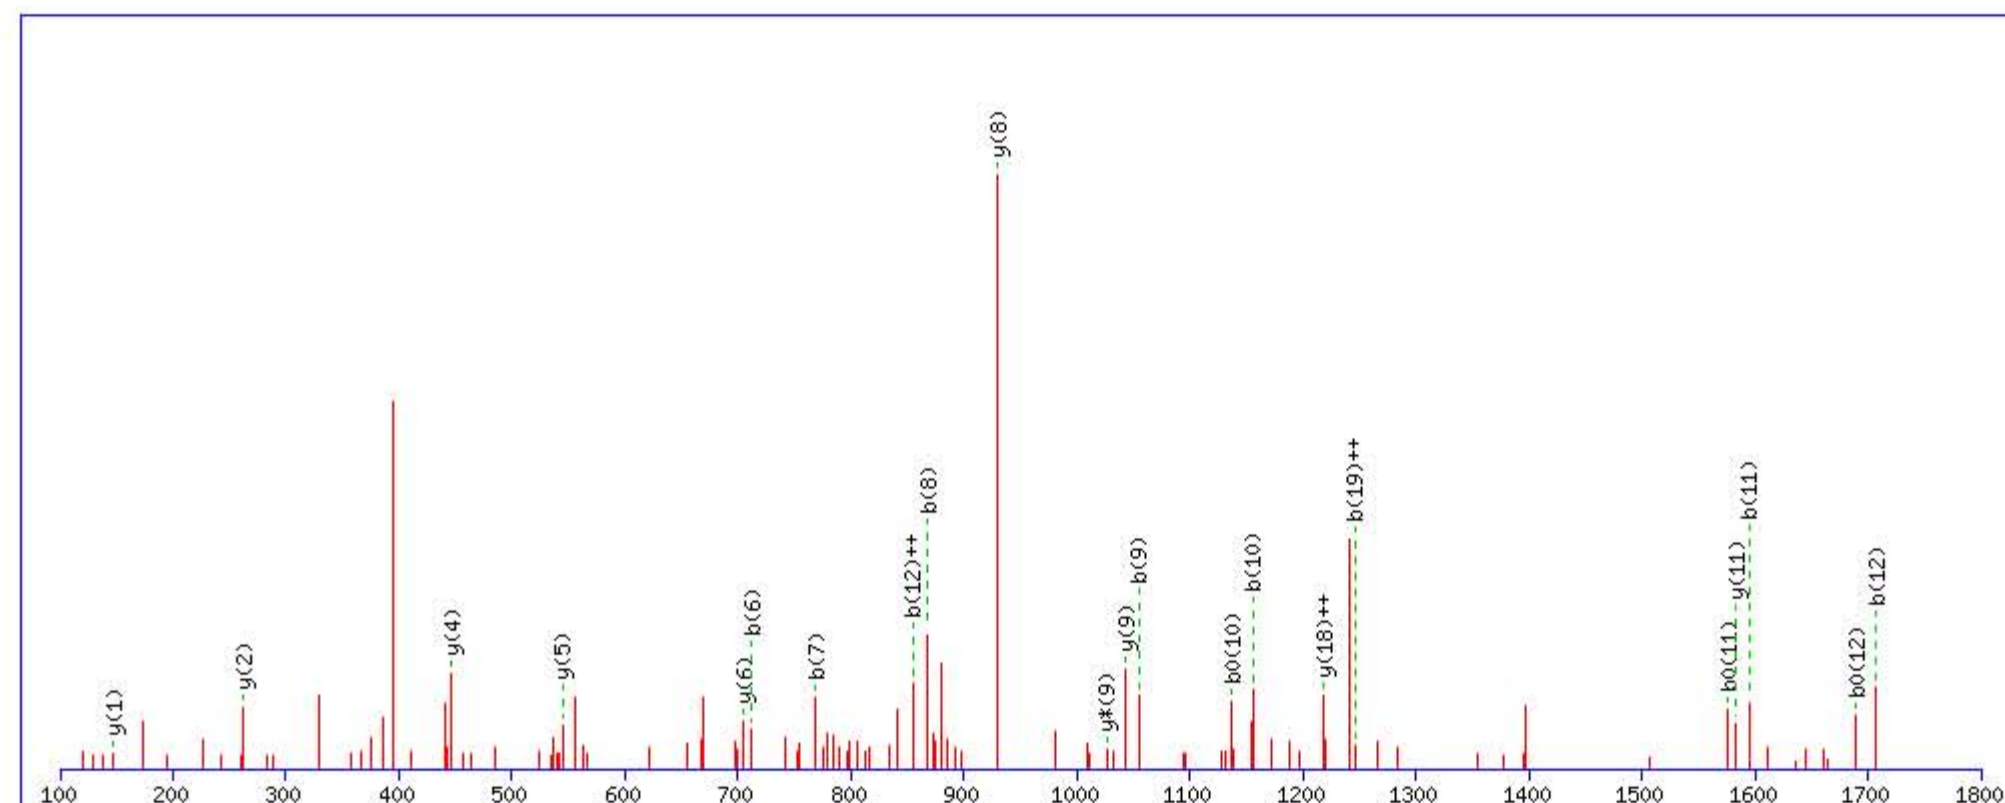

Monoisotopic mass of neutral peptide Mr(calc): 2636.327728

Fixed modifications: Carbamidomethyl (C) (apply to specified residues or termini only)

Variable modifications:

Q11 : Biotin:Thermo-21345 (Q)

Ions Score: 38 Expect: 0.0042

Matches : 22/206 fragment ions using 46 most intense peaks [\(help\)](#)

| #  | b                  | b <sup>++</sup>    | b <sup>*</sup> | b <sup>*++</sup> | b <sup>0</sup>     | b <sup>0++</sup> | Seq. | y                  | y <sup>++</sup>    | y <sup>*</sup>     | y <sup>*++</sup> | y <sup>0</sup> | y <sup>0++</sup> | #  |
|----|--------------------|--------------------|----------------|------------------|--------------------|------------------|------|--------------------|--------------------|--------------------|------------------|----------------|------------------|----|
| 1  | 88.039304          | 44.523290          |                |                  | 70.028739          | 35.518008        | S    |                    |                    |                    |                  |                |                  | 20 |
| 2  | 201.123368         | 101.065322         |                |                  | 183.112803         | 92.060039        | I    | 2550.302958        | 1275.655117        | 2533.276409        | 1267.141842      | 2532.292393    | 1266.649834      | 19 |
| 3  | 302.171047         | 151.589161         |                |                  | 284.160482         | 142.583879       | T    | 2437.218894        | <b>1219.113085</b> | 2420.192345        | 1210.599810      | 2419.208329    | 1210.107802      | 18 |
| 4  | 462.201696         | 231.604486         |                |                  | 444.191131         | 222.599204       | C    | 2336.171215        | 1168.589245        | 2319.144666        | 1160.075971      | 2318.160650    | 1159.583963      | 17 |
| 5  | 575.285760         | 288.146518         |                |                  | 557.275195         | 279.141236       | I    | 2176.140566        | 1088.573921        | 2159.114017        | 1080.060646      | 2158.130001    | 1079.568638      | 16 |
| 6  | <b>712.344672</b>  | 356.675974         |                |                  | 694.334107         | 347.670692       | H    | 2063.056502        | 1032.031889        | 2046.029953        | 1023.518614      | 2045.045937    | 1023.026606      | 15 |
| 7  | <b>769.366136</b>  | 385.186706         |                |                  | 751.355571         | 376.181424       | G    | 1925.997590        | 963.502433         | 1908.971041        | 954.989159       | 1907.987025    | 954.497151       | 14 |
| 8  | <b>868.434550</b>  | 434.720913         |                |                  | 850.423985         | 425.715631       | V    | 1868.976126        | 934.991701         | 1851.949577        | 926.478427       | 1850.965561    | 925.986419       | 13 |
| 9  | <b>1054.513863</b> | 527.760570         |                |                  | 1036.503298        | 518.755287       | W    | 1769.907712        | 885.457494         | 1752.881163        | 876.944220       | 1751.897147    | 876.452211       | 12 |
| 10 | <b>1155.561542</b> | 578.284409         |                |                  | <b>1137.550977</b> | 569.279127       | T    | <b>1583.828399</b> | 792.417838         | 1566.801850        | 783.904563       | 1565.817834    | 783.412555       | 11 |
| 11 | <b>1594.786868</b> | 797.897072         | 1577.760319    | 789.383798       | <b>1576.776303</b> | 788.891790       | Q    | 1482.780720        | 741.893998         | 1465.754171        | 733.380724       | 1464.770155    | 732.888715       | 10 |
| 12 | <b>1707.870932</b> | <b>854.439104</b>  | 1690.844383    | 845.925830       | <b>1689.860367</b> | 845.433822       | L    | <b>1043.555394</b> | 522.281335         | <b>1026.528845</b> | 513.768060       | 1025.544829    | 513.276052       | 9  |
| 13 | 1804.923696        | 902.965486         | 1787.897147    | 894.452212       | 1786.913131        | 893.960204       | P    | <b>930.471330</b>  | 465.739303         | 913.444781         | 457.226028       | 912.460765     | 456.734020       | 8  |
| 14 | 1932.982274        | 966.994775         | 1915.955725    | 958.481501       | 1914.971709        | 957.989493       | Q    | 833.418566         | 417.212921         | 816.392017         | 408.699646       | 815.408001     | 408.207638       | 7  |
| 15 | 2093.012923        | 1047.010099        | 2075.986374    | 1038.496825      | 2075.002358        | 1038.004817      | C    | <b>705.359988</b>  | 353.183632         | 688.333439         | 344.670357       | 687.349423     | 344.178349       | 6  |
| 16 | 2192.081337        | 1096.544306        | 2175.054788    | 1088.031032      | 2174.070772        | 1087.539024      | V    | <b>545.329339</b>  | 273.168308         | 528.302790         | 264.655033       | 527.318774     | 264.163025       | 5  |
| 17 | 2263.118451        | 1132.062863        | 2246.091902    | 1123.549589      | 2245.107886        | 1123.057581      | A    | <b>446.260925</b>  | 223.634101         | 429.234376         | 215.120826       | 428.250360     | 214.628818       | 4  |
| 18 | 2376.202515        | 1188.604895        | 2359.175966    | 1180.091621      | 2358.191950        | 1179.599613      | I    | 375.223811         | 188.115543         | 358.197262         | 179.602269       | 357.213246     | 179.110261       | 3  |
| 19 | 2491.229458        | <b>1246.118367</b> | 2474.202909    | 1237.605092      | 2473.218893        | 1237.113084      | D    | <b>262.139747</b>  | 131.573511         | 245.113198         | 123.060237       | 244.129182     | 122.568229       | 2  |
| 20 |                    |                    |                |                  |                    |                  | K    | <b>147.112804</b>  | 74.060040          | 130.086255         | 65.546765        |                |                  | 1  |

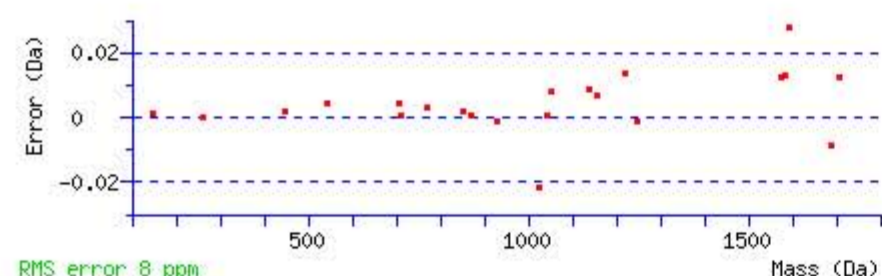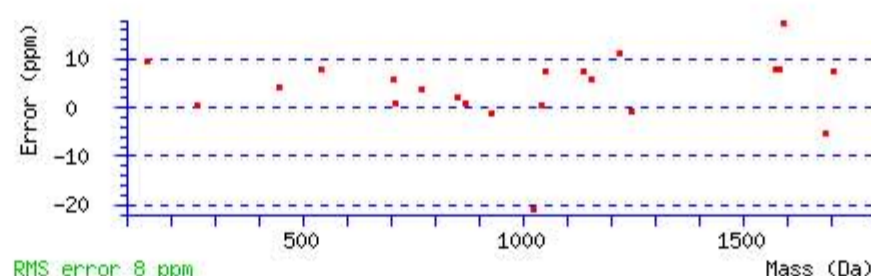

NCBI BLAST search of [SITCIHGVWTQLPQCVAIDK](#)

(Parameters: blastp, nr protein database, expect=20000, no filter, PAM30)

Other BLAST [web gateways](#)

All matches to this query

| Score | Mr(calc):   | Delta    | Sequence                             |
|-------|-------------|----------|--------------------------------------|
| 38.3  | 2636.327728 | 0.007334 | <a href="#">SITCIHGVWTQLPQCVAIDK</a> |
| 31.5  | 2636.327728 | 0.007334 | <a href="#">SITCIHGVWTQLPQCVAIDK</a> |

# Mascot Search Results

## Peptide View

MS/MS Fragmentation of **SITCIHGVWTQLPQCVAIDK**

Found in **CFAH\_HUMAN**, Complement factor H OS=Homo sapiens GN=CFH PE=1 SV=4

Match to Query 49832: 2636.337342 from(879.786390,3+) rtinseconds(2411) index(21306)

Title: Locus:1.1.1.3405.15 File:"2013-07-02 CLN FXIII 180 min 3rd F 2.wiff"

Data file C:\Program Files (x86)\Matrix Science\Mascot Daemon\mgf9 FXIII 180 min 3rd\mascot\_daemon\_merge.mgf

Click mouse within plot area to zoom in by factor of two about that point

Or, Plot from  to  Da

Label all possible matches  Label matches used for scoring

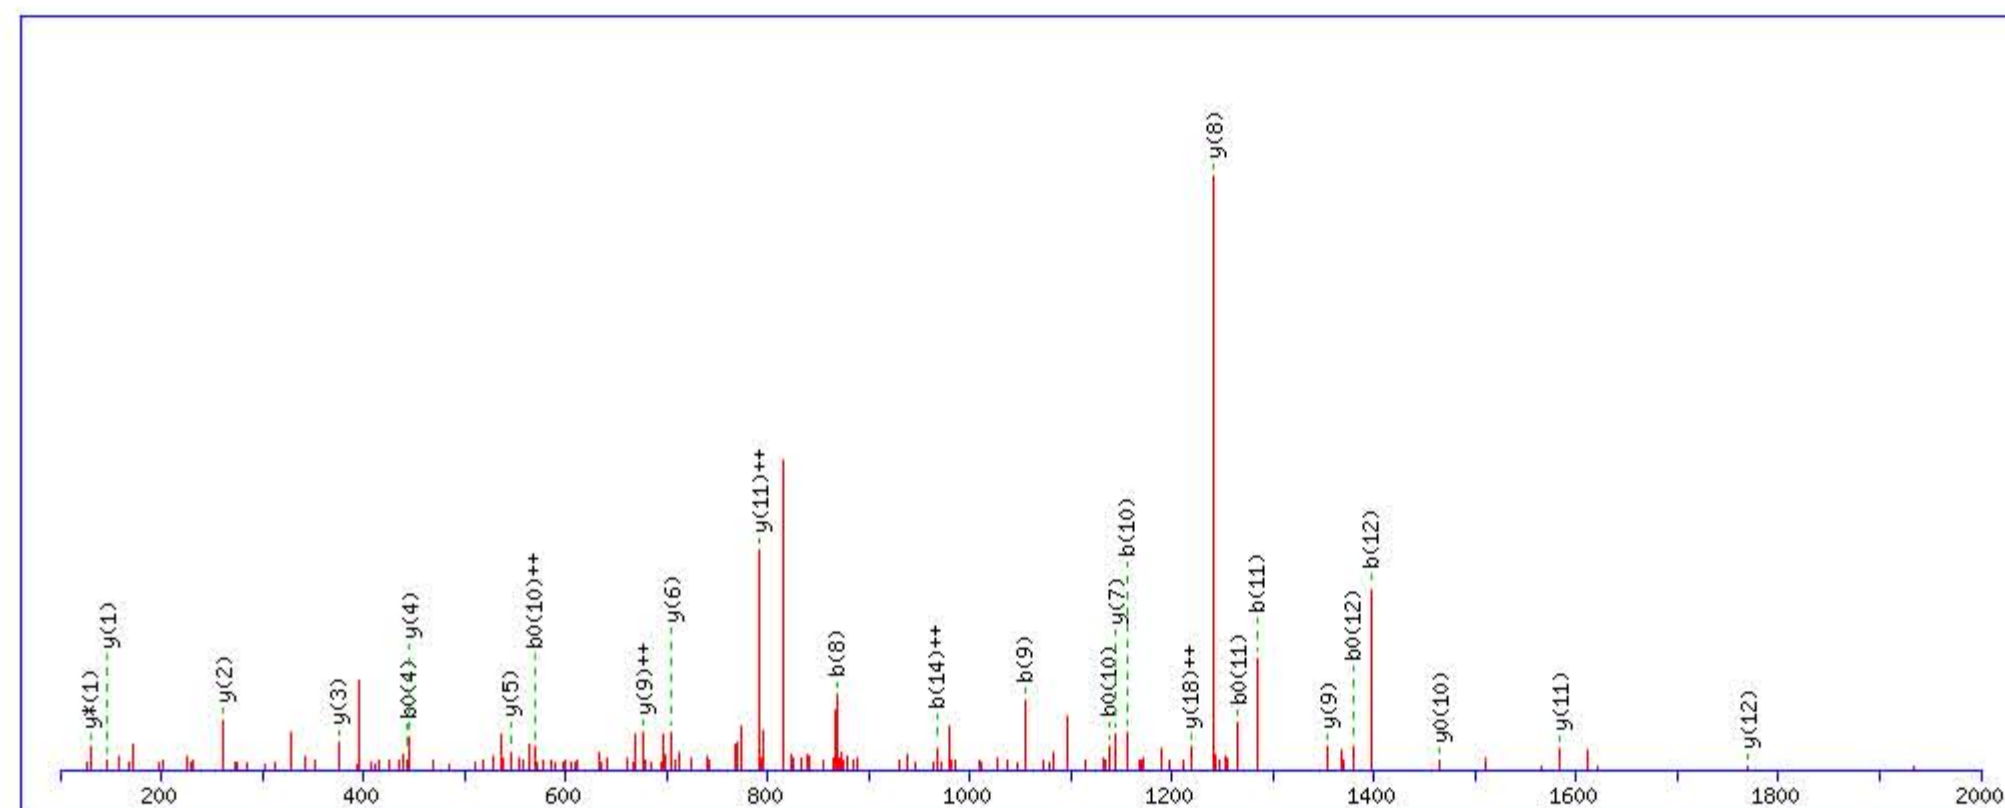

Monoisotopic mass of neutral peptide Mr(calc): 2636.327728

Fixed modifications: Carbamidomethyl (C) (apply to specified residues or termini only)

Variable modifications:

Q14 : Biotin:Thermo-21345 (Q)

Ions Score: 44 Expect: 9e-005

Matches : 27/206 fragment ions using 61 most intense peaks [\(help\)](#)

| #  | b           | b <sup>++</sup> | b <sup>*</sup> | b <sup>*++</sup> | b <sup>0</sup> | b <sup>0++</sup> | Seq. | y           | y <sup>++</sup> | y <sup>*</sup> | y <sup>*++</sup> | y <sup>0</sup> | y <sup>0++</sup> | #  |
|----|-------------|-----------------|----------------|------------------|----------------|------------------|------|-------------|-----------------|----------------|------------------|----------------|------------------|----|
| 1  | 88.039304   | 44.523290       |                |                  | 70.028739      | 35.518008        | S    |             |                 |                |                  |                |                  | 20 |
| 2  | 201.123368  | 101.065322      |                |                  | 183.112803     | 92.060039        | I    | 2550.302958 | 1275.655117     | 2533.276409    | 1267.141842      | 2532.292393    | 1266.649834      | 19 |
| 3  | 302.171047  | 151.589161      |                |                  | 284.160482     | 142.583879       | T    | 2437.218894 | 1219.113085     | 2420.192345    | 1210.599810      | 2419.208329    | 1210.107802      | 18 |
| 4  | 462.201696  | 231.604486      |                |                  | 444.191131     | 222.599204       | C    | 2336.171215 | 1168.589245     | 2319.144666    | 1160.075971      | 2318.160650    | 1159.583963      | 17 |
| 5  | 575.285760  | 288.146518      |                |                  | 557.275195     | 279.141236       | I    | 2176.140566 | 1088.573921     | 2159.114017    | 1080.060646      | 2158.130001    | 1079.568638      | 16 |
| 6  | 712.344672  | 356.675974      |                |                  | 694.334107     | 347.670692       | H    | 2063.056502 | 1032.031889     | 2046.029953    | 1023.518614      | 2045.045937    | 1023.026606      | 15 |
| 7  | 769.366136  | 385.186706      |                |                  | 751.355571     | 376.181424       | G    | 1925.997590 | 963.502433      | 1908.971041    | 954.989159       | 1907.987025    | 954.497151       | 14 |
| 8  | 868.434550  | 434.720913      |                |                  | 850.423985     | 425.715631       | V    | 1868.976126 | 934.991701      | 1851.949577    | 926.478427       | 1850.965561    | 925.986419       | 13 |
| 9  | 1054.513863 | 527.760570      |                |                  | 1036.503298    | 518.755287       | W    | 1769.907712 | 885.457494      | 1752.881163    | 876.944220       | 1751.897147    | 876.452211       | 12 |
| 10 | 1155.561542 | 578.284409      |                |                  | 1137.550977    | 569.279127       | T    | 1583.828399 | 792.417838      | 1566.801850    | 783.904563       | 1565.817834    | 783.412555       | 11 |
| 11 | 1283.620120 | 642.313698      | 1266.593571    | 633.800424       | 1265.609555    | 633.308416       | Q    | 1482.780720 | 741.893998      | 1465.754171    | 733.380724       | 1464.770155    | 732.888715       | 10 |
| 12 | 1396.704184 | 698.855730      | 1379.677635    | 690.342456       | 1378.693619    | 689.850448       | L    | 1354.722142 | 677.864709      | 1337.695593    | 669.351434       | 1336.711577    | 668.859426       | 9  |
| 13 | 1493.756948 | 747.382112      | 1476.730399    | 738.868838       | 1475.746383    | 738.376830       | P    | 1241.638078 | 621.322677      | 1224.611529    | 612.809403       | 1223.627513    | 612.317394       | 8  |
| 14 | 1932.982274 | 966.994775      | 1915.955725    | 958.481501       | 1914.971709    | 957.989493       | Q    | 1144.585314 | 572.796295      | 1127.558765    | 564.283021       | 1126.574749    | 563.791012       | 7  |
| 15 | 2093.012923 | 1047.010099     | 2075.986374    | 1038.496825      | 2075.002358    | 1038.004817      | C    | 705.359988  | 353.183632      | 688.333439     | 344.670357       | 687.349423     | 344.178349       | 6  |
| 16 | 2192.081337 | 1096.544306     | 2175.054788    | 1088.031032      | 2174.070772    | 1087.539024      | V    | 545.329339  | 273.168308      | 528.302790     | 264.655033       | 527.318774     | 264.163025       | 5  |
| 17 | 2263.118451 | 1132.062863     | 2246.091902    | 1123.549589      | 2245.107886    | 1123.057581      | A    | 446.260925  | 223.634101      | 429.234376     | 215.120826       | 428.250360     | 214.628818       | 4  |
| 18 | 2376.202515 | 1188.604895     | 2359.175966    | 1180.091621      | 2358.191950    | 1179.599613      | I    | 375.223811  | 188.115543      | 358.197262     | 179.602269       | 357.213246     | 179.110261       | 3  |
| 19 | 2491.229458 | 1246.118367     | 2474.202909    | 1237.605092      | 2473.218893    | 1237.113084      | D    | 262.139747  | 131.573511      | 245.113198     | 123.060237       | 244.129182     | 122.568229       | 2  |
| 20 |             |                 |                |                  |                |                  | K    | 147.112804  | 74.060040       | 130.086255     | 65.546765        |                |                  | 1  |

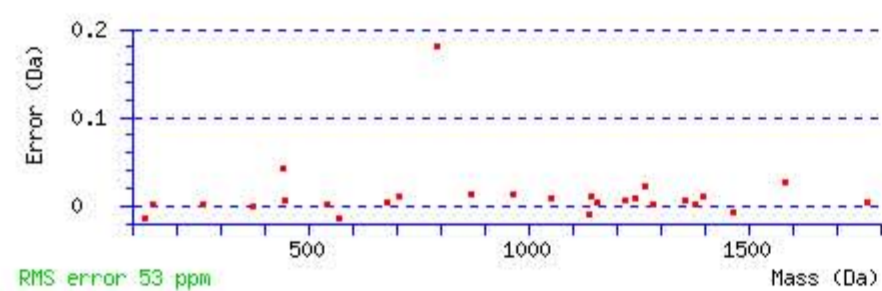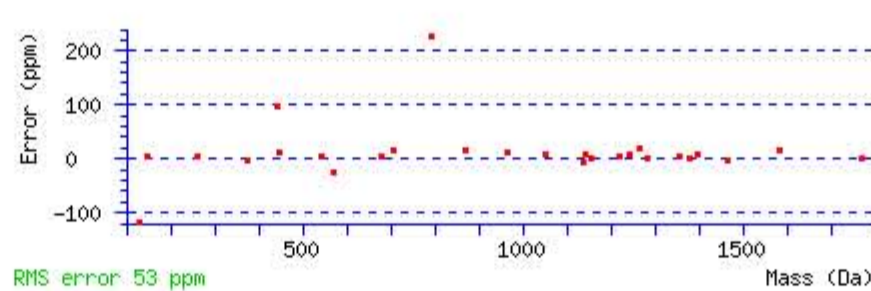

NCBI BLAST search of [SITCIHGVWTQLPQCVAIDK](#)

(Parameters: blastp, nr protein database, expect=20000, no filter, PAM30)

Other BLAST [web gateways](#)

## All matches to this query

| Score | Mr(calc):   | Delta     | Sequence                                  |
|-------|-------------|-----------|-------------------------------------------|
| 44.5  | 2636.327728 | 0.009614  | <a href="#">SITCIHGVWTQLPQCVAIDK</a>      |
| 23.9  | 2636.327728 | 0.009614  | <a href="#">SITCIHGVWTQLPQCVAIDK</a>      |
| 1.3   | 2636.357361 | -0.020019 | <a href="#">RWWTLAQEITVTFNQFTK</a>        |
| 1.0   | 2636.301682 | 0.035660  | <a href="#">TPDVLESSGPAVRSGLNATFMAFNR</a> |
| 0.2   | 2636.366592 | -0.029250 | <a href="#">ASKTTDLRIPASVCTMFNVLDVAK</a>  |

# Mascot Search Results

## Peptide View

MS/MS Fragmentation of **VSVLCQENYLIQEGEEITCK**

Found in **CFAH\_HUMAN**, Complement factor H OS=Homo sapiens GN=CFH PE=1 SV=4

Match to Query 50605: 2722.300362 from(908.440730,3+) rtinseconds(2775) index(36460)

Title: Locus:1.1.1.3628.23 File:"2013-07-02 CLN FXIII 180 min 3rd F 3.wiff"

Data file C:\Program Files (x86)\Matrix Science\Mascot Daemon\mgf9 FXIII 180 min 3rd\mascot\_daemon\_merge.mgf

Click mouse within plot area to zoom in by factor of two about that point

Or, Plot from  to  Da

Label all possible matches  Label matches used for scoring

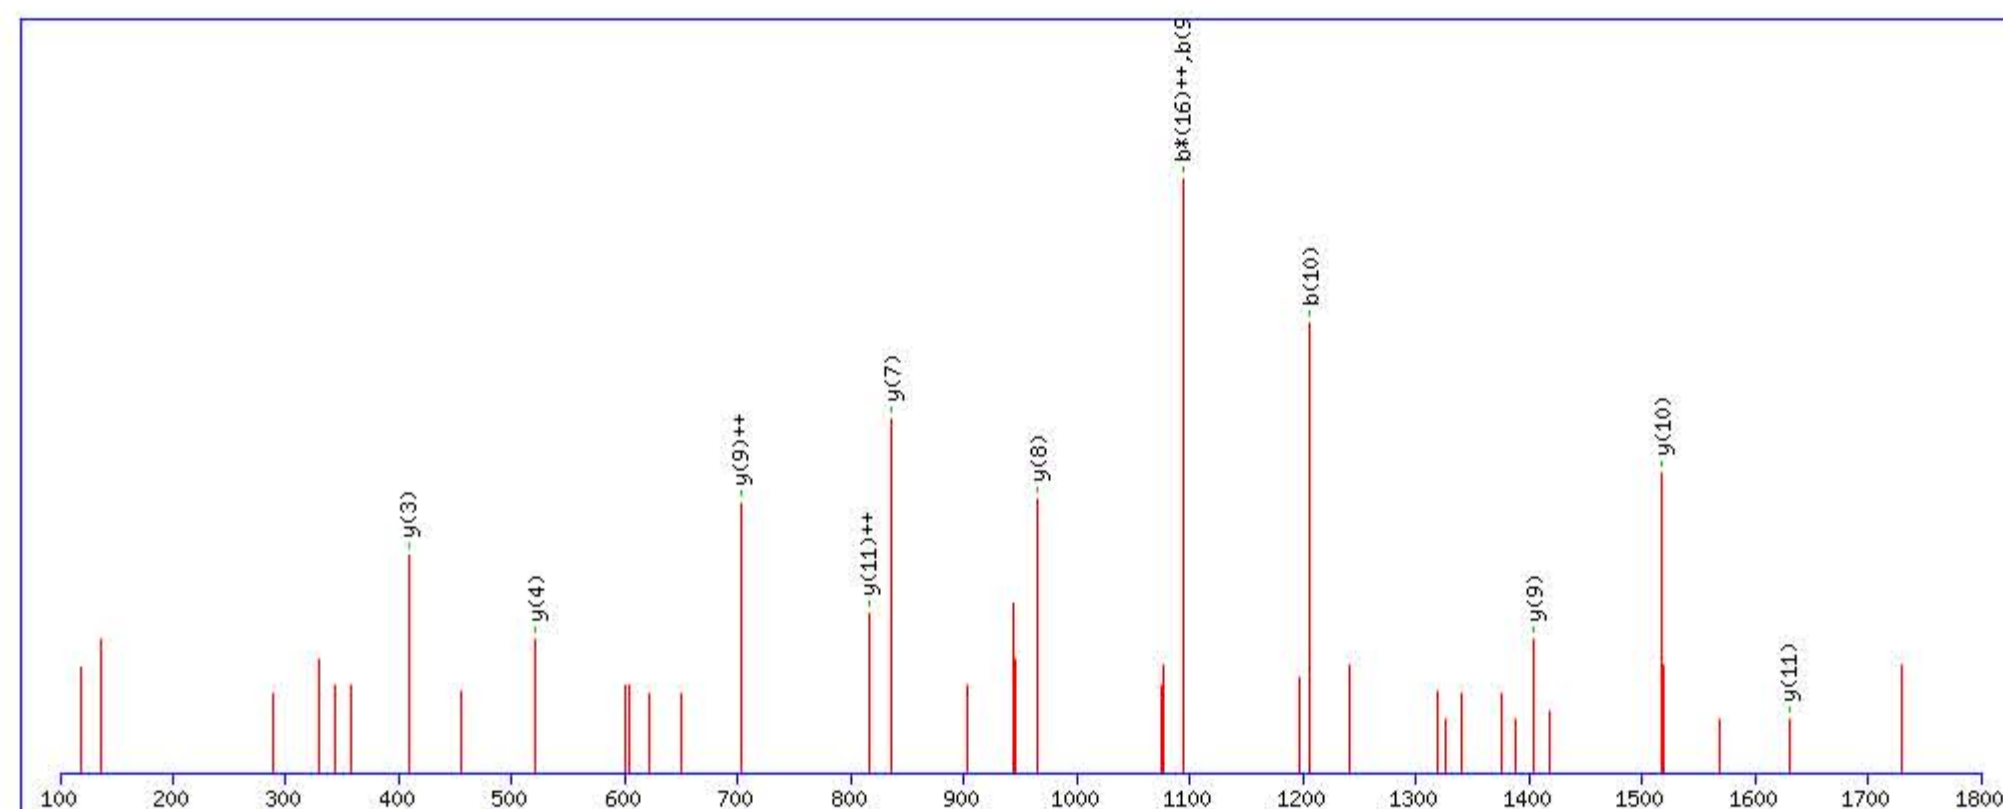

Monoisotopic mass of neutral peptide Mr(calc): 2722.301590

Fixed modifications: Carbamidomethyl (C) (apply to specified residues or termini only)

Variable modifications:

Q12 : Biotin:Thermo-21345 (Q)

Ions Score: 41 Expect: 0.0014

Matches : 12/212 fragment ions using 17 most intense peaks [\(help\)](#)

| #  | b                  | b <sup>++</sup> | b <sup>*</sup> | b <sup>*++</sup>   | b <sup>0</sup> | b <sup>0++</sup> | Seq. | y                  | y <sup>++</sup>   | y <sup>*</sup> | y <sup>*++</sup> | y <sup>0</sup> | y <sup>0++</sup> | #  |
|----|--------------------|-----------------|----------------|--------------------|----------------|------------------|------|--------------------|-------------------|----------------|------------------|----------------|------------------|----|
| 1  | 100.075690         | 50.541483       |                |                    |                |                  | V    |                    |                   |                |                  |                |                  | 20 |
| 2  | 187.107718         | 94.057497       |                |                    | 169.097153     | 85.052214        | S    | 2624.240475        | 1312.623875       | 2607.213926    | 1304.110601      | 2606.229910    | 1303.618593      | 19 |
| 3  | 286.176132         | 143.591704      |                |                    | 268.165567     | 134.586422       | V    | 2537.208447        | 1269.107861       | 2520.181898    | 1260.594587      | 2519.197882    | 1260.102579      | 18 |
| 4  | 399.260196         | 200.133736      |                |                    | 381.249631     | 191.128454       | L    | 2438.140033        | 1219.573654       | 2421.113484    | 1211.060380      | 2420.129468    | 1210.568372      | 17 |
| 5  | 559.290845         | 280.149061      |                |                    | 541.280280     | 271.143778       | C    | 2325.055969        | 1163.031622       | 2308.029420    | 1154.518348      | 2307.045404    | 1154.026340      | 16 |
| 6  | 687.349423         | 344.178350      | 670.322874     | 335.665075         | 669.338858     | 335.173067       | Q    | 2165.025320        | 1083.016298       | 2147.998771    | 1074.503023      | 2147.014755    | 1074.011015      | 15 |
| 7  | 816.392016         | 408.699646      | 799.365467     | 400.186372         | 798.381451     | 399.694364       | E    | 2036.966742        | 1018.987009       | 2019.940193    | 1010.473735      | 2018.956177    | 1009.981727      | 14 |
| 8  | 930.434943         | 465.721110      | 913.408394     | 457.207835         | 912.424378     | 456.715827       | N    | 1907.924149        | 954.465713        | 1890.897600    | 945.952438       | 1889.913584    | 945.460430       | 13 |
| 9  | <b>1093.498272</b> | 547.252774      | 1076.471723    | 538.739500         | 1075.487707    | 538.247492       | Y    | 1793.881222        | 897.444249        | 1776.854673    | 888.930975       | 1775.870657    | 888.438967       | 12 |
| 10 | <b>1206.582336</b> | 603.794806      | 1189.555787    | 595.281532         | 1188.571771    | 594.789523       | L    | <b>1630.817893</b> | <b>815.912585</b> | 1613.791344    | 807.399310       | 1612.807328    | 806.907302       | 11 |
| 11 | 1319.666400        | 660.336838      | 1302.639851    | 651.823563         | 1301.655835    | 651.331555       | I    | <b>1517.733829</b> | 759.370553        | 1500.707280    | 750.857278       | 1499.723264    | 750.365270       | 10 |
| 12 | 1758.891726        | 879.949501      | 1741.865177    | 871.436227         | 1740.881161    | 870.944219       | Q    | <b>1404.649765</b> | <b>702.828521</b> | 1387.623216    | 694.315246       | 1386.639200    | 693.823238       | 9  |
| 13 | 1887.934319        | 944.470798      | 1870.907770    | 935.957523         | 1869.923754    | 935.465515       | E    | <b>965.424439</b>  | 483.215858        | 948.397890     | 474.702583       | 947.413874     | 474.210575       | 8  |
| 14 | 1944.955783        | 972.981530      | 1927.929234    | 964.468255         | 1926.945218    | 963.976247       | G    | <b>836.381846</b>  | 418.694561        | 819.355297     | 410.181287       | 818.371281     | 409.689279       | 7  |
| 15 | 2073.998376        | 1037.502826     | 2056.971827    | 1028.989551        | 2055.987811    | 1028.497543      | E    | 779.360382         | 390.183829        | 762.333833     | 381.670555       | 761.349817     | 381.178547       | 6  |
| 16 | 2203.040969        | 1102.024123     | 2186.014420    | <b>1093.510848</b> | 2185.030404    | 1093.018840      | E    | 650.317789         | 325.662533        | 633.291240     | 317.149258       | 632.307224     | 316.657250       | 5  |
| 17 | 2316.125033        | 1158.566155     | 2299.098484    | 1150.052880        | 2298.114468    | 1149.560872      | I    | <b>521.275196</b>  | 261.141236        | 504.248647     | 252.627961       | 503.264631     | 252.135953       | 4  |
| 18 | 2417.172712        | 1209.089994     | 2400.146163    | 1200.576719        | 2399.162147    | 1200.084711      | T    | <b>408.191132</b>  | 204.599204        | 391.164583     | 196.085929       | 390.180567     | 195.593921       | 3  |
| 19 | 2577.203361        | 1289.105318     | 2560.176812    | 1280.592044        | 2559.192796    | 1280.100036      | C    | 307.143453         | 154.075364        | 290.116904     | 145.562090       |                |                  | 2  |
| 20 |                    |                 |                |                    |                |                  | K    | 147.112804         | 74.060040         | 130.086255     | 65.546765        |                |                  | 1  |

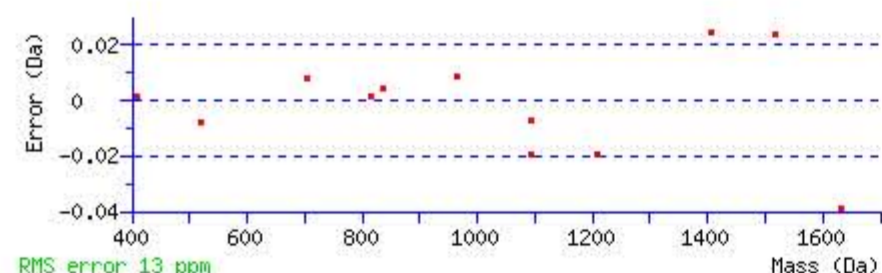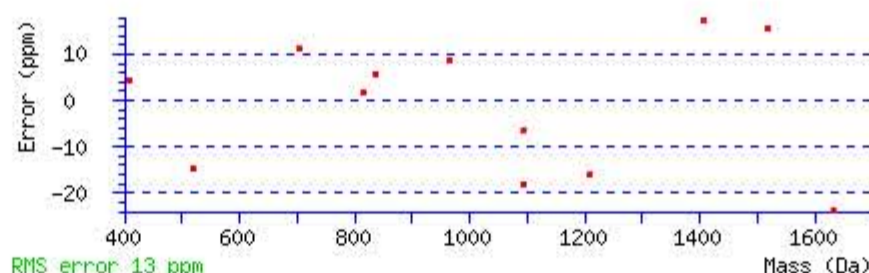

NCBI BLAST search of **VSVLCQENYLIQEGEEITCK**

(Parameters: blastp, nr protein database, expect=20000, no filter, PAM30)

Other BLAST [web gateways](#)

All matches to this query

| Score | Mr(calc):   | Delta     | Sequence                                |
|-------|-------------|-----------|-----------------------------------------|
| 40.9  | 2722.301590 | -0.001228 | <a href="#">VSVLCQENYLIQEGEEITCK</a>    |
| 37.9  | 2722.301590 | -0.001228 | <a href="#">VSVLCQENYLIQEGEEITCK</a>    |
| 10.5  | 2722.339783 | -0.039421 | <a href="#">QDREHLWKLIEGGAHIYVCGDAR</a> |



# MASCOT Search Results

## Peptide View

MS/MS Fragmentation of **VSVLCQENYLIQEGEEITCK**

Found in **CFAH\_HUMAN**, Complement factor H OS=Homo sapiens GN=CFH PE=1 SV=4

Match to Query 50606: 2722.300362 from(908.440730,3+) rtinseconds(2766) index(36384)

Title: Locus:1.1.1.3625.22 File:"2013-07-02 CLN FXIII 180 min 3rd F 3.wiff"

Data file C:\Program Files (x86)\Matrix Science\Mascot Daemon\mgf9 FXIII 180 min 3rd\mascot\_daemon\_merge.mgf

Click mouse within plot area to zoom in by factor of two about that point

Or, Plot from  to  Da

Label all possible matches  Label matches used for scoring

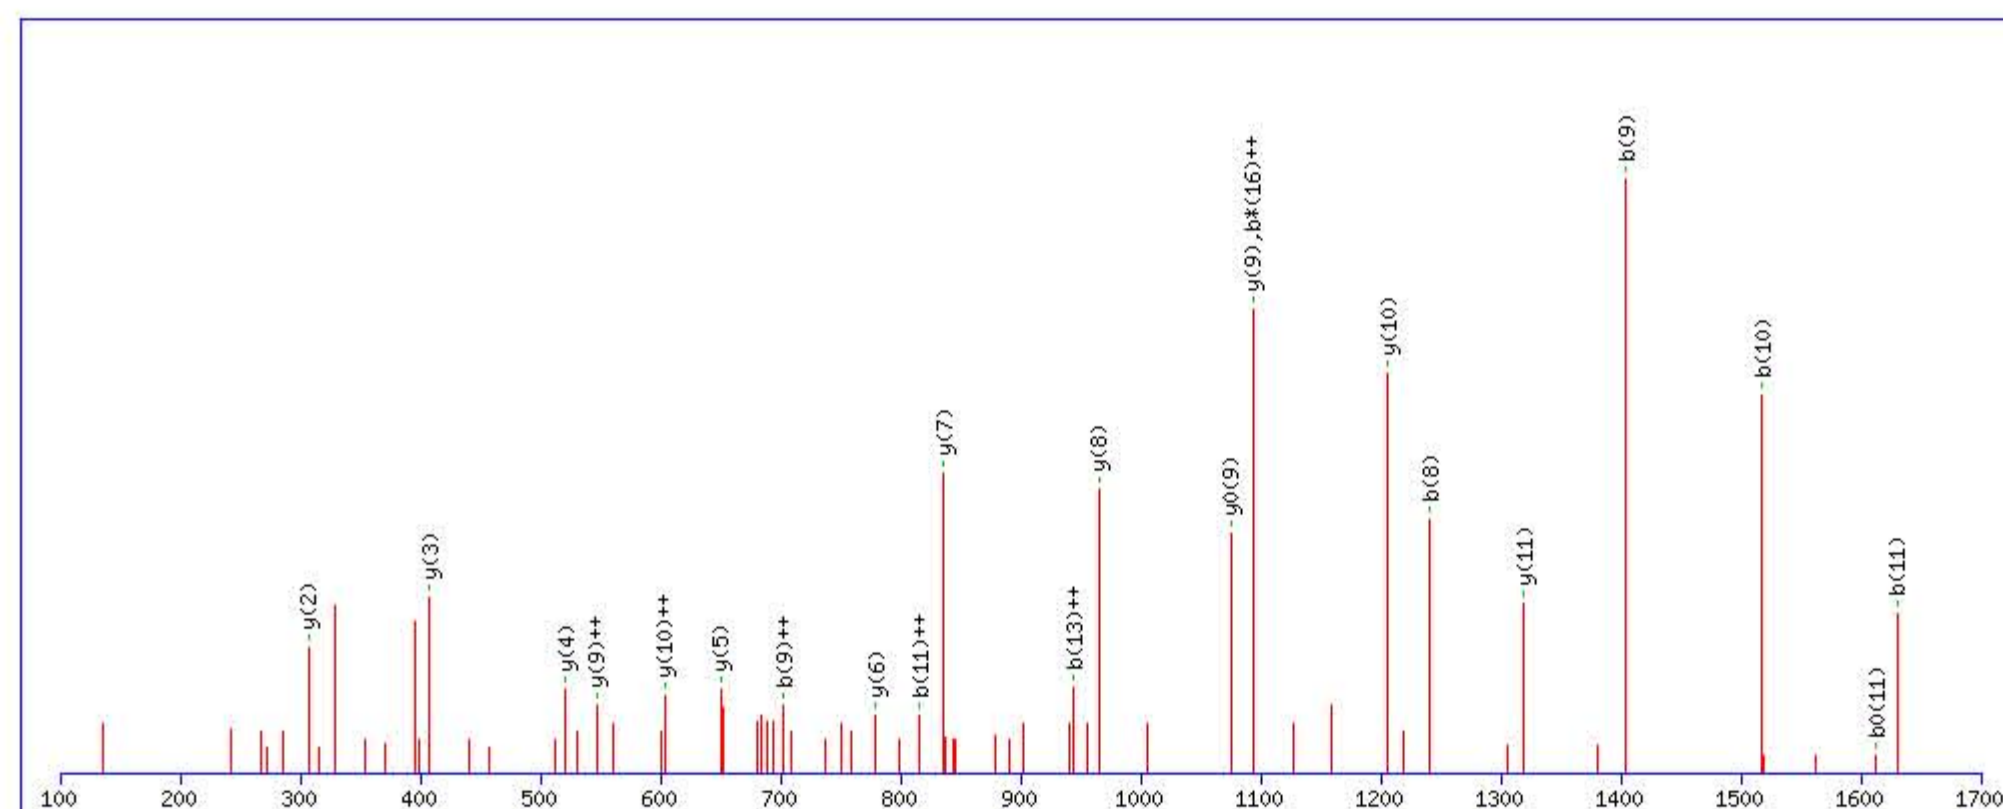

Monoisotopic mass of neutral peptide Mr(calc): 2722.301590

Fixed modifications: Carbamidomethyl (C) (apply to specified residues or termini only)

Variable modifications:

Q6 : Biotin:Thermo-21345 (Q)

Ions Score: 69 Expect: 2.8e-006

Matches : 22/212 fragment ions using 29 most intense peaks [\(help\)](#)

| #  | b                  | b <sup>++</sup>   | b <sup>*</sup> | b <sup>*++</sup>   | b <sup>0</sup>     | b <sup>0++</sup> | Seq. | y                  | y <sup>++</sup>   | y <sup>*</sup> | y <sup>*++</sup> | y <sup>0</sup>     | y <sup>0++</sup> | #  |
|----|--------------------|-------------------|----------------|--------------------|--------------------|------------------|------|--------------------|-------------------|----------------|------------------|--------------------|------------------|----|
| 1  | 100.075690         | 50.541483         |                |                    |                    |                  | V    |                    |                   |                |                  |                    |                  | 20 |
| 2  | 187.107718         | 94.057497         |                |                    | 169.097153         | 85.052214        | S    | 2624.240475        | 1312.623875       | 2607.213926    | 1304.110601      | 2606.229910        | 1303.618593      | 19 |
| 3  | 286.176132         | 143.591704        |                |                    | 268.165567         | 134.586422       | V    | 2537.208447        | 1269.107861       | 2520.181898    | 1260.594587      | 2519.197882        | 1260.102579      | 18 |
| 4  | 399.260196         | 200.133736        |                |                    | 381.249631         | 191.128454       | L    | 2438.140033        | 1219.573654       | 2421.113484    | 1211.060380      | 2420.129468        | 1210.568372      | 17 |
| 5  | 559.290845         | 280.149061        |                |                    | 541.280280         | 271.143778       | C    | 2325.055969        | 1163.031622       | 2308.029420    | 1154.518348      | 2307.045404        | 1154.026340      | 16 |
| 6  | 998.516171         | 499.761724        | 981.489622     | 491.248449         | 980.505606         | 490.756441       | Q    | 2165.025320        | 1083.016298       | 2147.998771    | 1074.503023      | 2147.014755        | 1074.011015      | 15 |
| 7  | 1127.558764        | 564.283020        | 1110.532215    | 555.769746         | 1109.548199        | 555.277738       | E    | 1725.799994        | 863.403635        | 1708.773445    | 854.890361       | 1707.789429        | 854.398353       | 14 |
| 8  | <b>1241.601691</b> | 621.304484        | 1224.575142    | 612.791209         | 1223.591126        | 612.299201       | N    | 1596.757401        | 798.882339        | 1579.730852    | 790.369064       | 1578.746836        | 789.877056       | 13 |
| 9  | <b>1404.665020</b> | <b>702.836148</b> | 1387.638471    | 694.322874         | 1386.654455        | 693.830866       | Y    | 1482.714474        | 741.860875        | 1465.687925    | 733.347601       | 1464.703909        | 732.855593       | 12 |
| 10 | <b>1517.749084</b> | 759.378180        | 1500.722535    | 750.864906         | 1499.738519        | 750.372898       | L    | <b>1319.651145</b> | 660.329211        | 1302.624596    | 651.815936       | 1301.640580        | 651.323928       | 11 |
| 11 | <b>1630.833148</b> | <b>815.920212</b> | 1613.806599    | 807.406938         | <b>1612.822583</b> | 806.914929       | I    | <b>1206.567081</b> | <b>603.787179</b> | 1189.540532    | 595.273904       | 1188.556516        | 594.781896       | 10 |
| 12 | 1758.891726        | 879.949501        | 1741.865177    | 871.436227         | 1740.881161        | 870.944219       | Q    | <b>1093.483017</b> | <b>547.245147</b> | 1076.456468    | 538.731872       | <b>1075.472452</b> | 538.239864       | 9  |
| 13 | 1887.934319        | <b>944.470798</b> | 1870.907770    | 935.957523         | 1869.923754        | 935.465515       | E    | <b>965.424439</b>  | 483.215858        | 948.397890     | 474.702583       | 947.413874         | 474.210575       | 8  |
| 14 | 1944.955783        | 972.981530        | 1927.929234    | 964.468255         | 1926.945218        | 963.976247       | G    | <b>836.381846</b>  | 418.694561        | 819.355297     | 410.181287       | 818.371281         | 409.689279       | 7  |
| 15 | 2073.998376        | 1037.502826       | 2056.971827    | 1028.989551        | 2055.987811        | 1028.497543      | E    | <b>779.360382</b>  | 390.183829        | 762.333833     | 381.670555       | 761.349817         | 381.178547       | 6  |
| 16 | 2203.040969        | 1102.024123       | 2186.014420    | <b>1093.510848</b> | 2185.030404        | 1093.018840      | E    | <b>650.317789</b>  | 325.662533        | 633.291240     | 317.149258       | 632.307224         | 316.657250       | 5  |
| 17 | 2316.125033        | 1158.566155       | 2299.098484    | 1150.052880        | 2298.114468        | 1149.560872      | I    | <b>521.275196</b>  | 261.141236        | 504.248647     | 252.627961       | 503.264631         | 252.135953       | 4  |
| 18 | 2417.172712        | 1209.089994       | 2400.146163    | 1200.576719        | 2399.162147        | 1200.084711      | T    | <b>408.191132</b>  | 204.599204        | 391.164583     | 196.085929       | 390.180567         | 195.593921       | 3  |
| 19 | 2577.203361        | 1289.105318       | 2560.176812    | 1280.592044        | 2559.192796        | 1280.100036      | C    | <b>307.143453</b>  | 154.075364        | 290.116904     | 145.562090       |                    |                  | 2  |
| 20 |                    |                   |                |                    |                    |                  | K    | 147.112804         | 74.060040         | 130.086255     | 65.546765        |                    |                  | 1  |

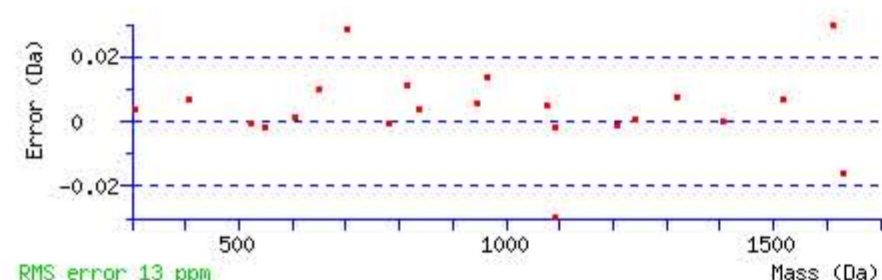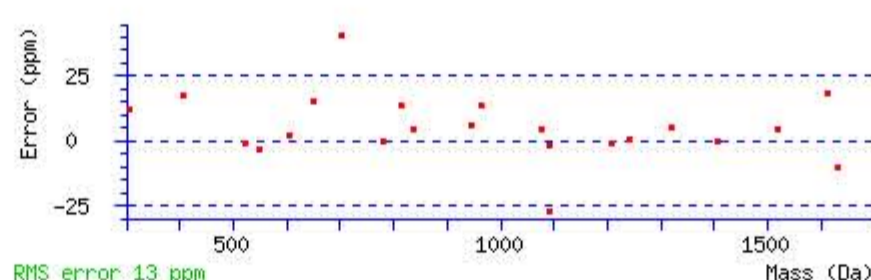

NCBI BLAST search of **VSVLCQENYLIQEGEEITCK**

(Parameters: blastp, nr protein database, expect=20000, no filter, PAM30)

Other BLAST [web gateways](#)

All matches to this query

| Score | Mr(calc):   | Delta     | Sequence                                |
|-------|-------------|-----------|-----------------------------------------|
| 68.5  | 2722.301590 | -0.001228 | <a href="#">VSVLCQENYLIQEGEEITCK</a>    |
| 65.8  | 2722.301590 | -0.001228 | <a href="#">VSVLCQENYLIQEGEEITCK</a>    |
| 19.1  | 2722.339783 | -0.039421 | <a href="#">QDREHLWKLIEGGAHIYVCGDAR</a> |

**MASCOT** Mascot Search Results

**Peptide View**

MS/MS Fragmentation of **NTEILTGSWSDQTYPEGTQAIYK**  
 Found in **CFAH\_HUMAN**, Complement factor H OS=Homo sapiens GN=CFH PE=1 SV=4

Match to Query 53096: 2912.404242 from(971.808690,3+) rtinseconds(2412) index(21309)  
 Title: Locus:1.1.1.3405.18 File:"2013-07-02 CLN FXIII 180 min 3rd F 2.wiff"  
 Data file C:\Program Files (x86)\Matrix Science\Mascot Daemon\mgf\9 FXIII 180 min 3rd\mascot\_daemon\_merge.mgf

Click mouse within plot area to zoom in by factor of two about that point  
 Or, Plot from  to  Da   
 Label all possible matches  Label matches used for scoring

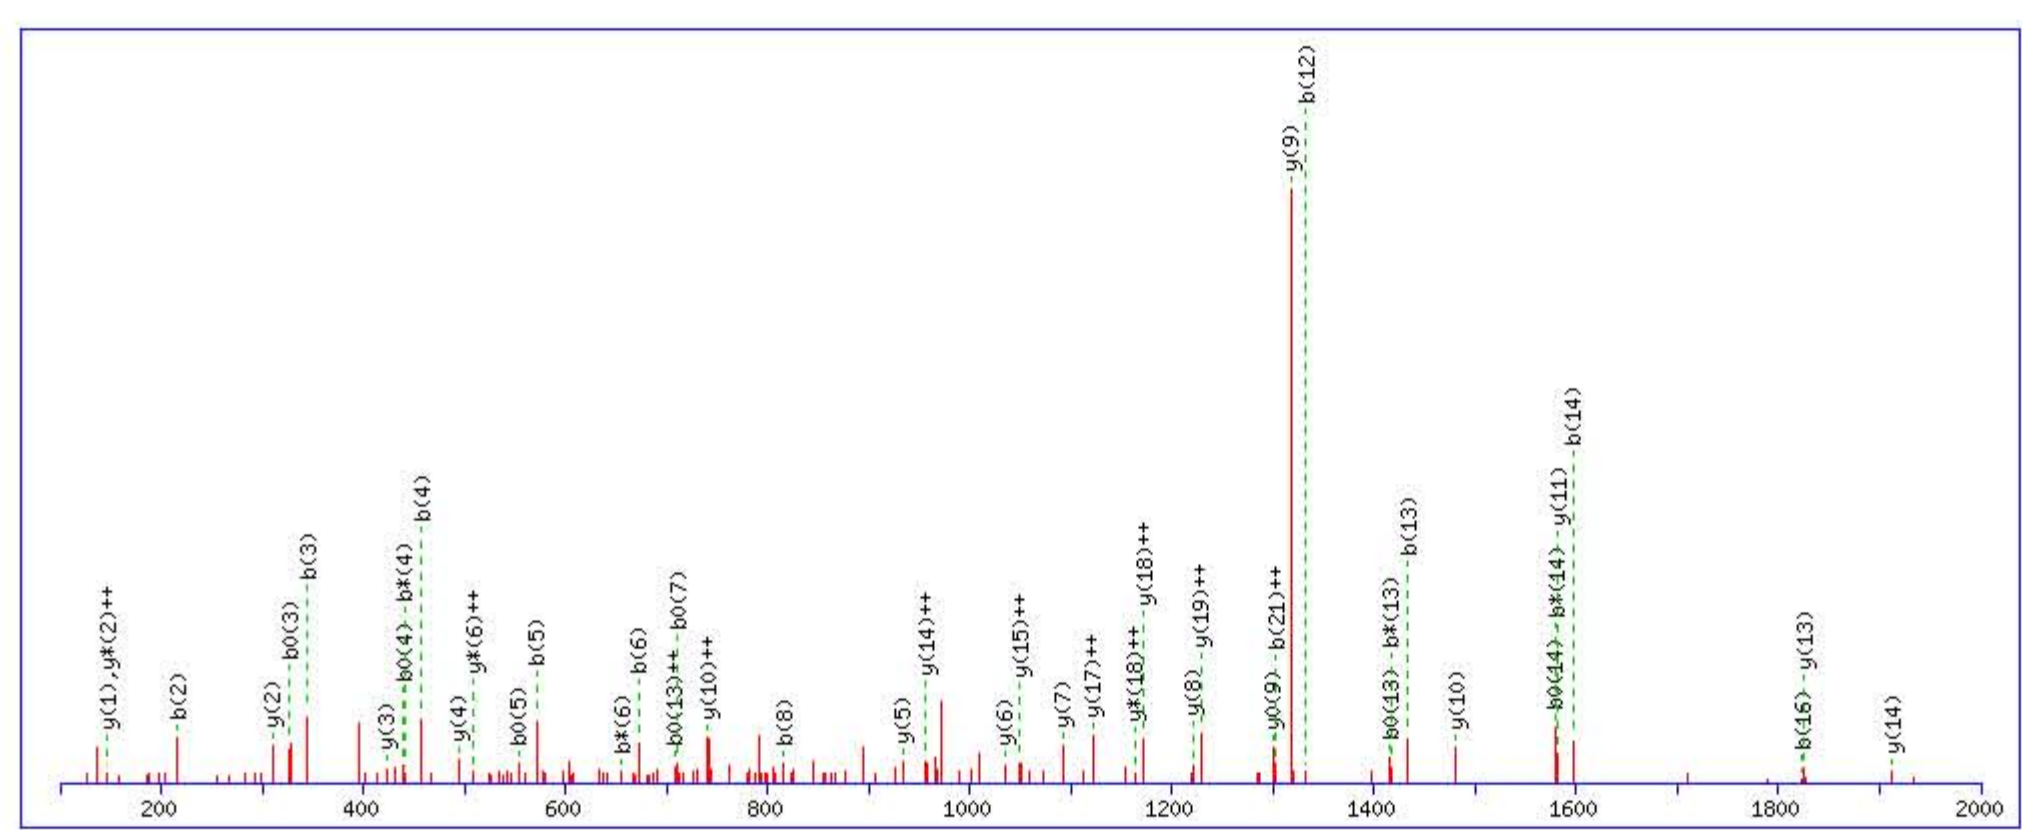

Monoisotopic mass of neutral peptide  $M_r(\text{calc})$ : 2912.390213  
 Fixed modifications: Carbamidomethyl (C) (apply to specified residues or termini only)  
 Variable modifications: Q19 : Biotin:Thermo-21345 (Q)  
 Ions Score: 69 Expect: 3e-006  
 Matches : 45/252 fragment ions using 89 most intense peaks [\(help\)](#)

| #  | b                  | b <sup>++</sup>    | b <sup>+</sup>     | b <sup>+++</sup> | b <sup>0</sup>     | b <sup>0++</sup>  | Seq. | y                  | y <sup>++</sup>    | y <sup>+</sup> | y <sup>+++</sup>   | y <sup>0</sup>     | y <sup>0++</sup> | #  |
|----|--------------------|--------------------|--------------------|------------------|--------------------|-------------------|------|--------------------|--------------------|----------------|--------------------|--------------------|------------------|----|
| 1  | 115.050203         | 58.028740          | 98.023654          | 49.515465        |                    |                   | N    |                    |                    |                |                    |                    |                  | 23 |
| 2  | <b>216.097882</b>  | 108.552579         | 199.071333         | 100.039305       | 198.087317         | 99.547296         | T    | 2799.354578        | 1400.180927        | 2782.328029    | 1391.667652        | 2781.344013        | 1391.175644      | 22 |
| 3  | <b>345.140475</b>  | 173.073875         | 328.113926         | 164.560601       | <b>327.129910</b>  | 164.068593        | E    | 2698.306899        | 1349.657087        | 2681.280350    | 1341.143813        | 2680.296334        | 1340.651805      | 21 |
| 4  | <b>458.224539</b>  | 229.615907         | <b>441.197990</b>  | 221.102633       | <b>440.213974</b>  | 220.610625        | I    | 2569.264306        | 1285.135791        | 2552.237757    | 1276.622516        | 2551.253741        | 1276.130508      | 20 |
| 5  | <b>571.308603</b>  | 286.157940         | 554.282054         | 277.644665       | <b>553.298038</b>  | 277.152657        | L    | 2456.180242        | <b>1228.593759</b> | 2439.153693    | 1220.080484        | 2438.169677        | 1219.588476      | 19 |
| 6  | <b>672.356282</b>  | 336.681779         | <b>655.329733</b>  | 328.168505       | 654.345717         | 327.676497        | T    | 2343.096178        | <b>1172.051727</b> | 2326.069629    | <b>1163.538452</b> | 2325.085613        | 1163.046444      | 18 |
| 7  | 729.377746         | 365.192511         | 712.351197         | 356.679237       | <b>711.367181</b>  | 356.187229        | G    | 2242.048499        | <b>1121.527887</b> | 2225.021950    | 1113.014613        | 2224.037934        | 1112.522605      | 17 |
| 8  | <b>816.409774</b>  | 408.708525         | 799.383225         | 400.195251       | 798.399209         | 399.703243        | S    | 2185.027035        | 1093.017155        | 2168.000486    | 1084.503881        | 2167.016470        | 1084.011873      | 16 |
| 9  | 1002.489087        | 501.748182         | 985.462538         | 493.234907       | 984.478522         | 492.742899        | W    | 2097.995007        | <b>1049.501141</b> | 2080.968458    | 1040.987867        | 2079.984442        | 1040.495859      | 15 |
| 10 | 1089.521115        | 545.264196         | 1072.494566        | 536.750921       | 1071.510550        | 536.258913        | S    | <b>1911.915694</b> | <b>956.461485</b>  | 1894.889145    | 947.948211         | 1893.905129        | 947.456203       | 14 |
| 11 | 1204.548058        | 602.777667         | 1187.521509        | 594.264393       | 1186.537493        | 593.772385        | D    | <b>1824.883666</b> | 912.945471         | 1807.857117    | 904.432197         | 1806.873101        | 903.940189       | 13 |
| 12 | <b>1332.606636</b> | 666.806956         | 1315.580087        | 658.293682       | 1314.596071        | 657.801674        | Q    | 1709.856723        | 855.432000         | 1692.830174    | 846.918725         | 1691.846158        | 846.426717       | 12 |
| 13 | <b>1433.654315</b> | 717.330796         | <b>1416.627766</b> | 708.817521       | <b>1415.643750</b> | <b>708.325513</b> | T    | <b>1581.798145</b> | 791.402711         | 1564.771596    | 782.889436         | 1563.787580        | 782.397428       | 11 |
| 14 | <b>1596.717644</b> | 798.862460         | <b>1579.691095</b> | 790.349186       | <b>1578.707079</b> | 789.857178        | Y    | <b>1480.750466</b> | <b>740.878871</b>  | 1463.723917    | 732.365597         | 1462.739901        | 731.873589       | 10 |
| 15 | 1693.770408        | 847.388842         | 1676.743859        | 838.875568       | 1675.759843        | 838.383560        | P    | <b>1317.687137</b> | 659.347207         | 1300.660588    | 650.833932         | <b>1299.676572</b> | 650.341924       | 9  |
| 16 | <b>1822.813001</b> | 911.910139         | 1805.786452        | 903.396864       | 1804.802436        | 902.904856        | E    | <b>1220.634373</b> | 610.820825         | 1203.607824    | 602.307550         | 1202.623808        | 601.815542       | 8  |
| 17 | 1879.834465        | 940.420871         | 1862.807916        | 931.907596       | 1861.823900        | 931.415588        | G    | <b>1091.591780</b> | 546.299528         | 1074.565231    | 537.786254         | 1073.581215        | 537.294246       | 7  |
| 18 | 1980.882144        | 990.944710         | 1963.855595        | 982.431436       | 1962.871579        | 981.939428        | T    | <b>1034.570316</b> | 517.788796         | 1017.543767    | <b>509.275522</b>  | 1016.559751        | 508.783514       | 6  |
| 19 | 2420.107470        | 1210.557373        | 2403.080921        | 1202.044098      | 2402.096905        | 1201.552090       | Q    | <b>933.522637</b>  | 467.264957         | 916.496088     | 458.751682         |                    |                  | 5  |
| 20 | 2491.144584        | 1246.075930        | 2474.118035        | 1237.562655      | 2473.134019        | 1237.070648       | A    | <b>494.297311</b>  | 247.652294         | 477.270762     | 239.139019         |                    |                  | 4  |
| 21 | 2604.228648        | <b>1302.617962</b> | 2587.202099        | 1294.104688      | 2586.218083        | 1293.612680       | I    | <b>423.260197</b>  | 212.133737         | 406.233648     | 203.620462         |                    |                  | 3  |
| 22 | 2767.291977        | 1384.149627        | 2750.265428        | 1375.636352      | 2749.281412        | 1375.144344       | Y    | <b>310.176133</b>  | 155.591705         | 293.149584     | <b>147.078430</b>  |                    |                  | 2  |
| 23 |                    |                    |                    |                  |                    |                   | K    | <b>147.112804</b>  | 74.060040          | 130.086255     | 65.546765          |                    |                  | 1  |

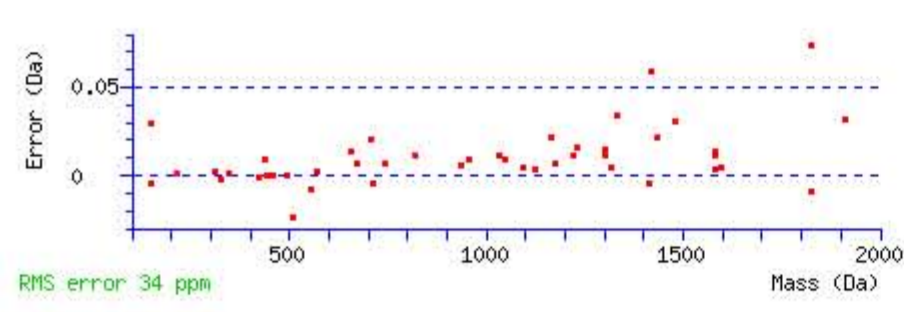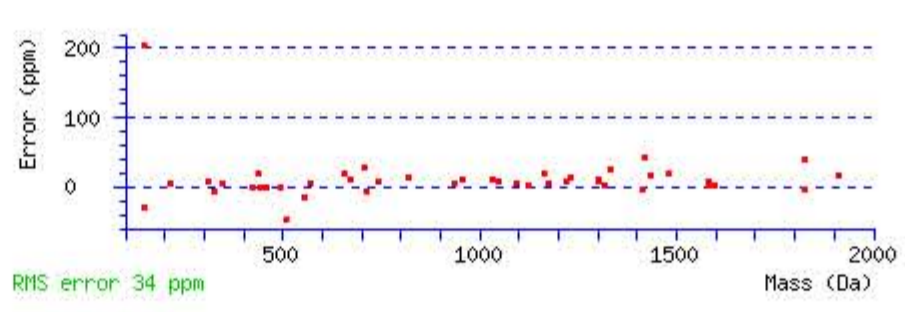

NCBI BLAST search of [NTEILTGSWSDQTYPEGTQAIYK](#)  
 (Parameters: blastp, nr protein database, expect=20000, no filter, PAM30)  
 Other BLAST [web gateways](#)

**All matches to this query**

| Score | $M_r(\text{calc})$ : | Delta    | Sequence                                |
|-------|----------------------|----------|-----------------------------------------|
| 69.2  | 2912.390213          | 0.014029 | <a href="#">NTEILTGSWSDQTYPEGTQAIYK</a> |
| 17.3  | 2912.390213          | 0.014029 | <a href="#">NTEILTGSWSDQTYPEGTQAIYK</a> |

# **MASCOT** Mascot Search Results

## Peptide View

MS/MS Fragmentation of **VFCQPWQR**

Found in **CFAI\_HUMAN**, Complement factor I OS=Homo sapiens GN=CFI PE=1 SV=2

Match to Query 25327: 1430.700788 from(716.357670,2+) rtinseconds(2043) index(60838)

Title: Locus:1.1.1.1623.5 File:"2013-07-02 CLN FXIII 180 min 3rd FT.wiff"

Data file C:\Program Files (x86)\Matrix Science\Mascot Daemon\mgf9 FXIII 180 min 3rd\mascot\_daemon\_merge.mgf

Click mouse within plot area to zoom in by factor of two about that point

Or, Plot from  to  Da

Label all possible matches  Label matches used for scoring

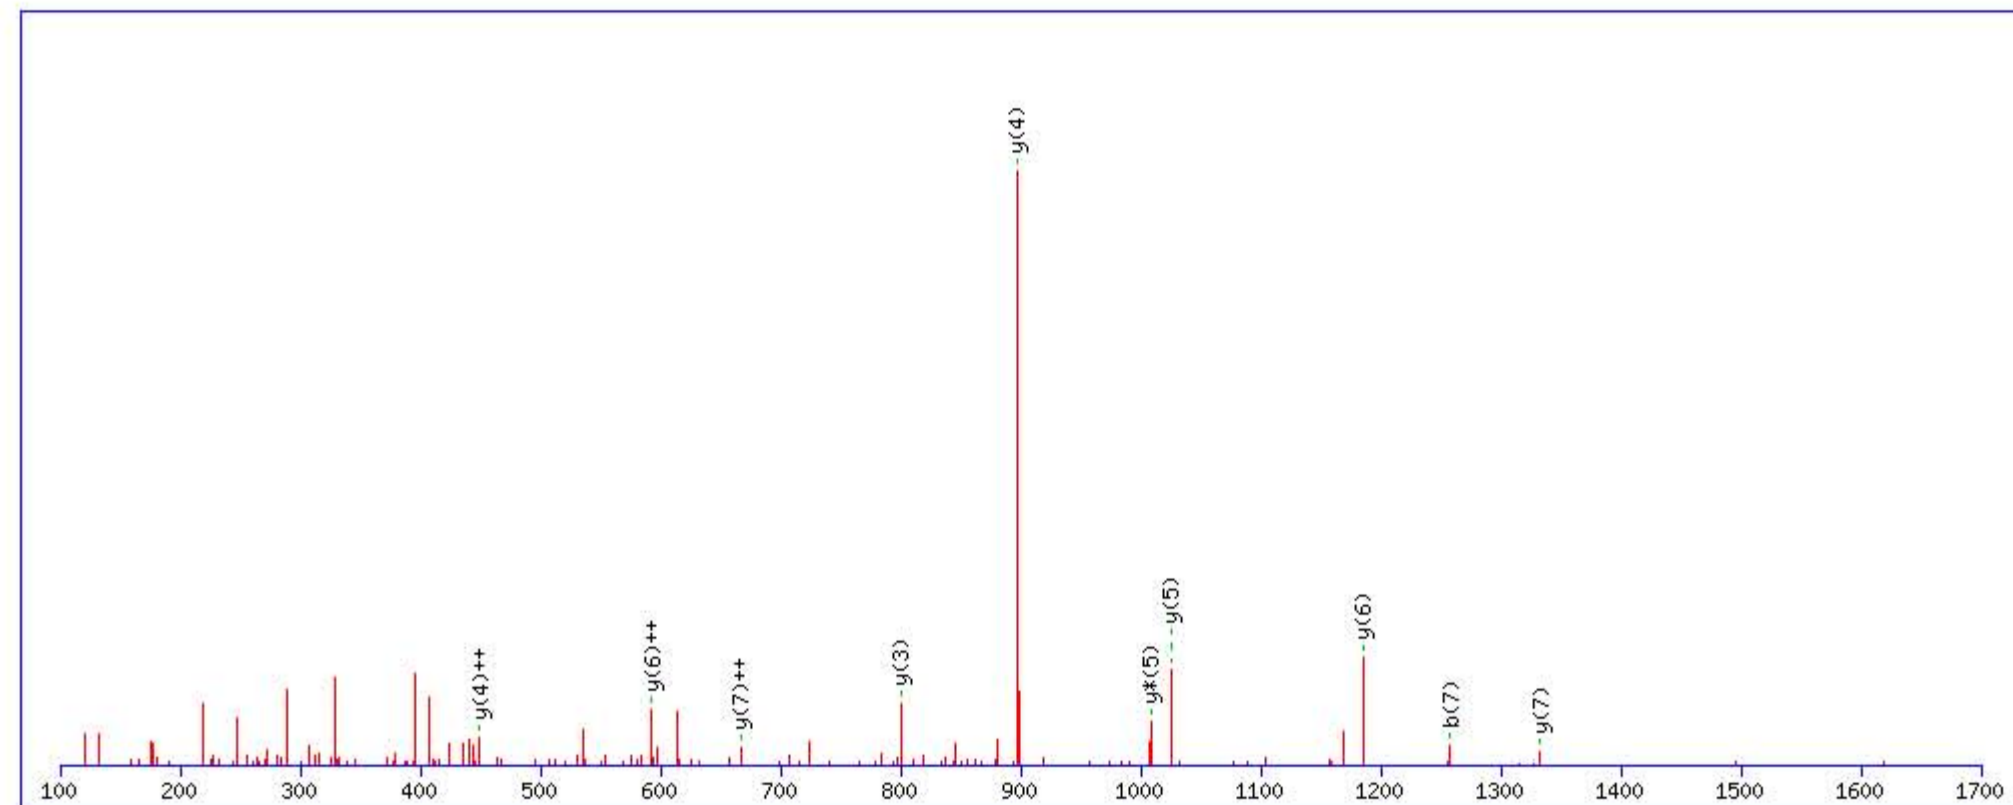

Monoisotopic mass of neutral peptide Mr(calc): 1430.695145

Fixed modifications: Carbamidomethyl (C) (apply to specified residues or termini only)

Variable modifications:

Q7 : Biotin:Thermo-21345 (Q)

Ions Score: 36 Expect: 0.00057

Matches : 10/50 fragment ions using 13 most intense peaks [\(help\)](#)

| # | b           | b <sup>++</sup> | b <sup>*</sup> | b <sup>*++</sup> | Seq. | y           | y <sup>++</sup> | y <sup>*</sup> | y <sup>*++</sup> | # |
|---|-------------|-----------------|----------------|------------------|------|-------------|-----------------|----------------|------------------|---|
| 1 | 100.075690  | 50.541483       |                |                  | V    |             |                 |                |                  | 8 |
| 2 | 247.144104  | 124.075690      |                |                  | F    | 1332.633996 | 666.820636      | 1315.607447    | 658.307362       | 7 |
| 3 | 407.174753  | 204.091014      |                |                  | C    | 1185.565582 | 593.286429      | 1168.539033    | 584.773155       | 6 |
| 4 | 535.233331  | 268.120304      | 518.206782     | 259.607029       | Q    | 1025.534933 | 513.271105      | 1008.508384    | 504.757830       | 5 |
| 5 | 632.286095  | 316.646686      | 615.259546     | 308.133411       | P    | 897.476355  | 449.241816      | 880.449806     | 440.728541       | 4 |
| 6 | 818.365408  | 409.686342      | 801.338859     | 401.173068       | W    | 800.423591  | 400.715434      | 783.397042     | 392.202159       | 3 |
| 7 | 1257.590734 | 629.299005      | 1240.564185    | 620.785731       | Q    | 614.344278  | 307.675777      | 597.317729     | 299.162503       | 2 |
| 8 |             |                 |                |                  | R    | 175.118952  | 88.063114       | 158.092403     | 79.549839        | 1 |

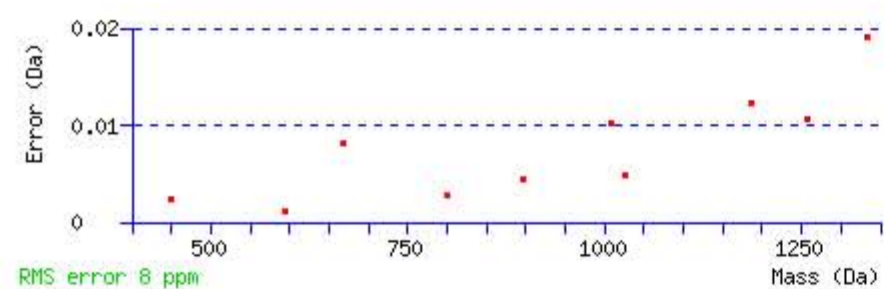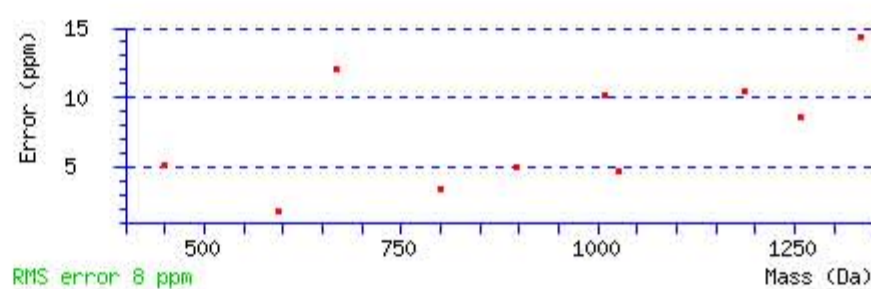

NCBI BLAST search of [VFCQPWQR](#)

(Parameters: blastp, nr protein database, expect=20000, no filter, PAM30)

Other BLAST [web gateways](#)

All matches to this query

| Score | Mr(calc):   | Delta     | Sequence                      |
|-------|-------------|-----------|-------------------------------|
| 35.8  | 1430.695145 | 0.005643  | <a href="#">VFCQPWQR</a>      |
| 7.5   | 1430.695145 | 0.005643  | <a href="#">VFCQPWQR</a>      |
| 1.1   | 1430.693619 | 0.007169  | <a href="#">QLQTLSPGGGGNR</a> |
| 1.1   | 1430.697144 | 0.003644  | <a href="#">EATMKMAVMIFK</a>  |
| 1.1   | 1430.697144 | 0.003644  | <a href="#">EATMKMAVMIFK</a>  |
| 0.9   | 1430.711319 | -0.010531 | <a href="#">RAKAEDENETLR</a>  |
| 0.8   | 1430.700989 | -0.000201 | <a href="#">DMGLMNAIGLQPR</a> |
| 0.3   | 1430.700989 | -0.000201 | <a href="#">NMPQADAMVLVAR</a> |

Mascot: <http://www.matrixscience.com/>

# MASCOT Search Results

## Peptide View

MS/MS Fragmentation of **TMGYQDFADVVCYTQK**

Found in **CFAI\_HUMAN**, Complement factor I OS=Homo sapiens GN=CFI PE=1 SV=2

Match to Query 26881: 2236.026252 from(746.349360,3+) rtinseconds(2518) index(63365)

Title: Locus:1.1.1.1788.19 File:"2013-07-02 CLN FXIII 180 min 3rd FT.wiff"

Data file C:\Program Files (x86)\Matrix Science\Mascot Daemon\mgf\9 FXIII 180 min 3rd\mascot\_daemon\_merge.mgf

Click mouse within plot area to zoom in by factor of two about that point

Or, Plot from  to  Da

Label all possible matches  Label matches used for scoring

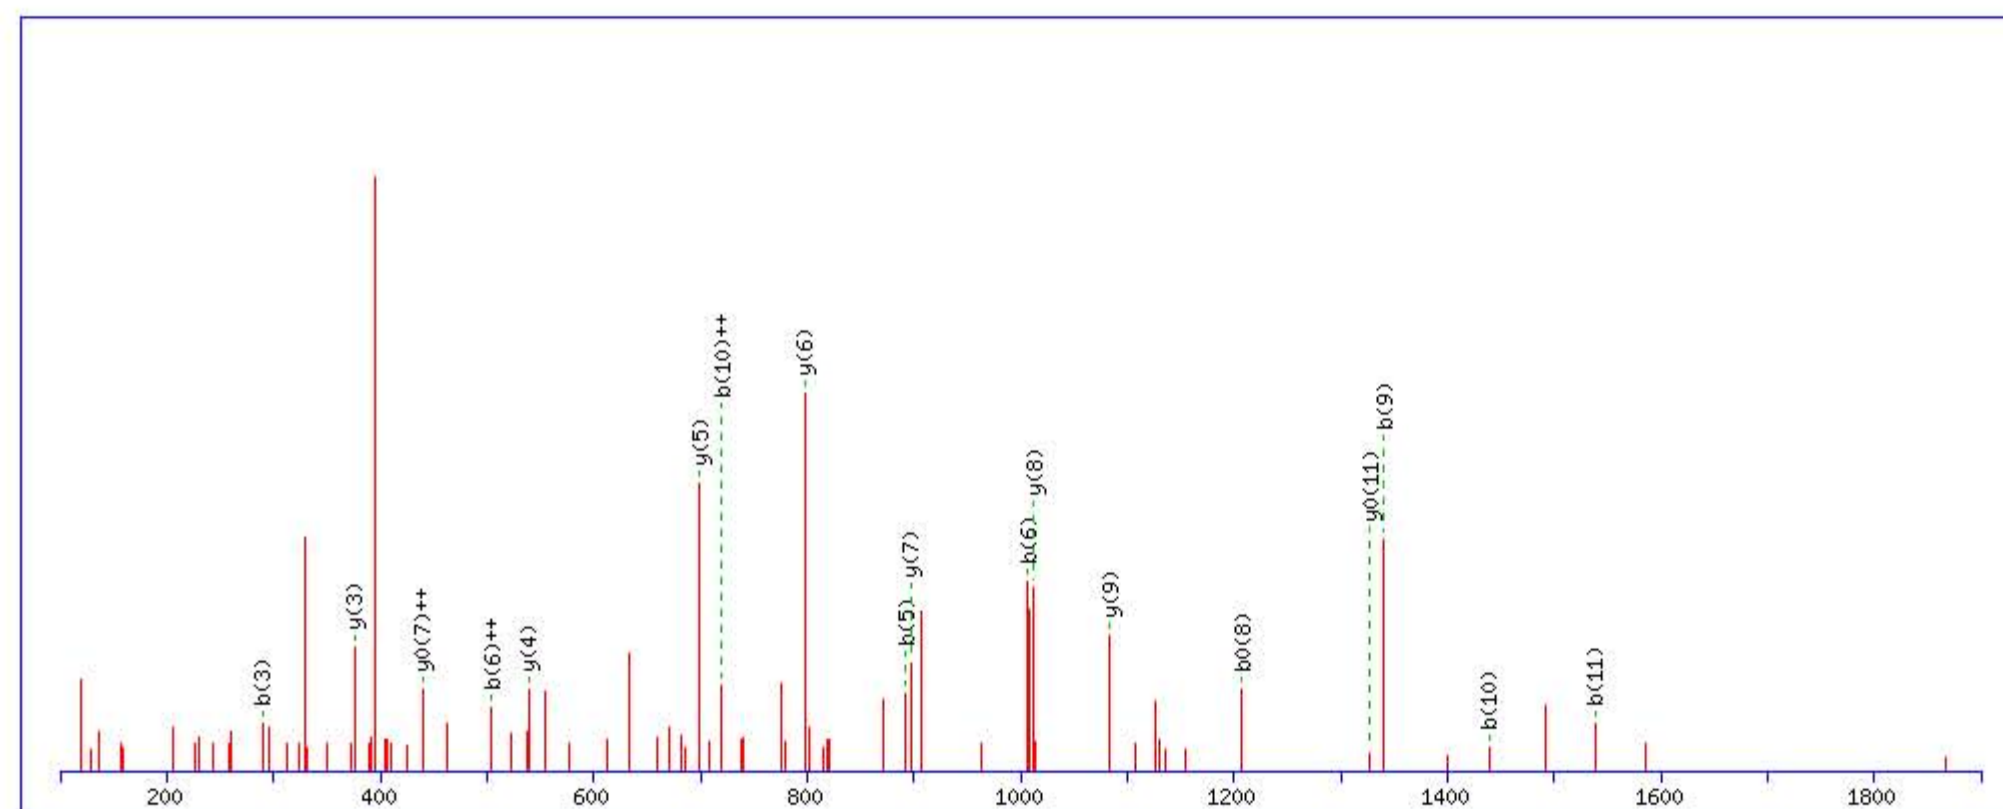

Monoisotopic mass of neutral peptide Mr(calc): 2236.000305

Fixed modifications: Carbamidomethyl (C) (apply to specified residues or termini only)

Variable modifications:

Q5 : Biotin:Thermo-21345 (Q)

Ions Score: 32 Expect: 0.0031

Matches : 18/168 fragment ions using 40 most intense peaks [\(help\)](#)

| #  | b                  | b <sup>++</sup>   | b <sup>*</sup> | b <sup>*++</sup> | b <sup>0</sup>     | b <sup>0++</sup> | Seq. | y                  | y <sup>++</sup> | y <sup>*</sup> | y <sup>*++</sup> | y <sup>0</sup>     | y <sup>0++</sup>  | #  |
|----|--------------------|-------------------|----------------|------------------|--------------------|------------------|------|--------------------|-----------------|----------------|------------------|--------------------|-------------------|----|
| 1  | 102.054955         | 51.531116         |                |                  | 84.044390          | 42.525833        | T    |                    |                 |                |                  |                    |                   | 16 |
| 2  | 233.095440         | 117.051358        |                |                  | 215.084875         | 108.046076       | M    | 2135.959885        | 1068.483580     | 2118.933336    | 1059.970306      | 2117.949320        | 1059.478298       | 15 |
| 3  | <b>290.116904</b>  | 145.562090        |                |                  | 272.106339         | 136.556807       | G    | 2004.919400        | 1002.963338     | 1987.892851    | 994.450064       | 1986.908835        | 993.958056        | 14 |
| 4  | 453.180233         | 227.093754        |                |                  | 435.169668         | 218.088472       | Y    | 1947.897936        | 974.452606      | 1930.871387    | 965.939332       | 1929.887371        | 965.447324        | 13 |
| 5  | <b>892.405559</b>  | 446.706418        | 875.379010     | 438.193143       | 874.394994         | 437.701135       | Q    | 1784.834607        | 892.920942      | 1767.808058    | 884.407667       | 1766.824042        | 883.915659        | 12 |
| 6  | <b>1007.432502</b> | <b>504.219889</b> | 990.405953     | 495.706615       | 989.421937         | 495.214607       | D    | 1345.609281        | 673.308279      | 1328.582732    | 664.795004       | <b>1327.598716</b> | 664.302996        | 11 |
| 7  | 1154.500916        | 577.754096        | 1137.474367    | 569.240822       | 1136.490351        | 568.748813       | F    | 1230.582338        | 615.794807      | 1213.555789    | 607.281533       | 1212.571773        | 606.789525        | 10 |
| 8  | 1225.538030        | 613.272653        | 1208.511481    | 604.759379       | <b>1207.527465</b> | 604.267370       | A    | <b>1083.513924</b> | 542.260600      | 1066.487375    | 533.747326       | 1065.503359        | 533.255318        | 9  |
| 9  | <b>1340.564973</b> | 670.786125        | 1323.538424    | 662.272850       | 1322.554408        | 661.780842       | D    | <b>1012.476810</b> | 506.742043      | 995.450261     | 498.228769       | 994.466245         | 497.736761        | 8  |
| 10 | <b>1439.633387</b> | <b>720.320332</b> | 1422.606838    | 711.807057       | 1421.622822        | 711.315049       | V    | <b>897.449867</b>  | 449.228572      | 880.423318     | 440.715297       | 879.439302         | <b>440.223289</b> | 7  |
| 11 | <b>1538.701801</b> | 769.854539        | 1521.675252    | 761.341264       | 1520.691236        | 760.849256       | V    | <b>798.381453</b>  | 399.694365      | 781.354904     | 391.181090       | 780.370888         | 390.689082        | 6  |
| 12 | 1698.732450        | 849.869863        | 1681.705901    | 841.356589       | 1680.721885        | 840.864581       | C    | <b>699.313039</b>  | 350.160158      | 682.286490     | 341.646883       | 681.302474         | 341.154875        | 5  |
| 13 | 1861.795779        | 931.401528        | 1844.769230    | 922.888253       | 1843.785214        | 922.396245       | Y    | <b>539.282390</b>  | 270.144833      | 522.255841     | 261.631559       | 521.271825         | 261.139551        | 4  |
| 14 | 1962.843458        | 981.925367        | 1945.816909    | 973.412093       | 1944.832893        | 972.920085       | T    | <b>376.219061</b>  | 188.613168      | 359.192512     | 180.099894       | 358.208496         | 179.607886        | 3  |
| 15 | 2090.902036        | 1045.954656       | 2073.875487    | 1037.441381      | 2072.891471        | 1036.949373      | Q    | 275.171382         | 138.089329      | 258.144833     | 129.576054       |                    |                   | 2  |
| 16 |                    |                   |                |                  |                    |                  | K    | 147.112804         | 74.060040       | 130.086255     | 65.546765        |                    |                   | 1  |

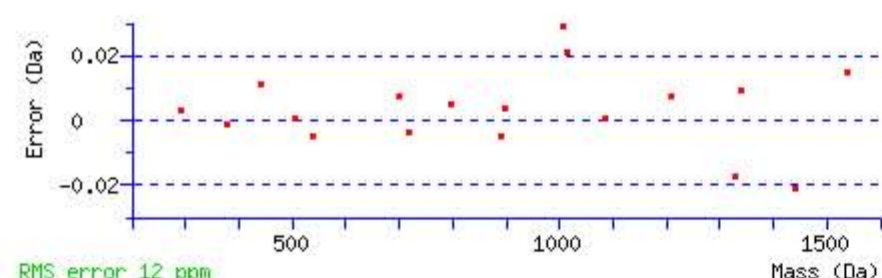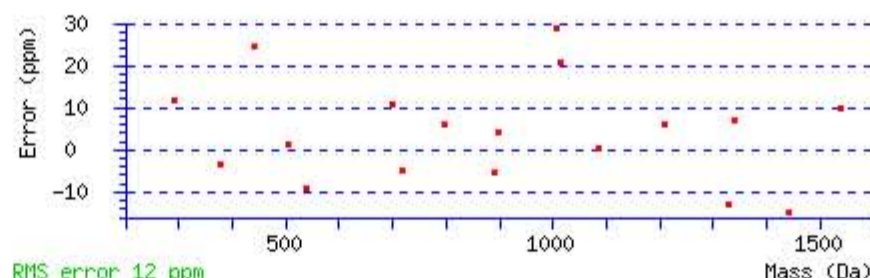

NCBI BLAST search of **TMGYQDFADVVCYTQK**  
 (Parameters: blastp, nr protein database, expect=20000, no filter, PAM30)  
 Other BLAST [web gateways](#)

### All matches to this query

| Score | Mr(calc):   | Delta     | Sequence                            |
|-------|-------------|-----------|-------------------------------------|
| 31.7  | 2236.000305 | 0.025947  | <a href="#">TMGYQDFADVVCYTQK</a>    |
| 4.8   | 2236.057587 | -0.031335 | <a href="#">RVLGESGEMDALRIQMEDR</a> |

# MASCOT Search Results

## Peptide View

MS/MS Fragmentation of **VTYTSQEDLVEK**

Found in **CFAI\_HUMAN**, Complement factor I OS=Homo sapiens GN=CFI PE=1 SV=2

Match to Query 34094: 1721.855622 from(574.959150,3+) rtinseconds(1897) index(59866)

Title: Locus:1.1.1.1572.9 File:"2013-07-02 CLN FXIII 180 min 3rd FT.wiff"

Data file C:\Program Files (x86)\Matrix Science\Mascot Daemon\mgf9 FXIII 180 min 3rd\mascot\_daemon\_merge.mgf

Click mouse within plot area to zoom in by factor of two about that point

Or, Plot from  to  Da

Label all possible matches  Label matches used for scoring

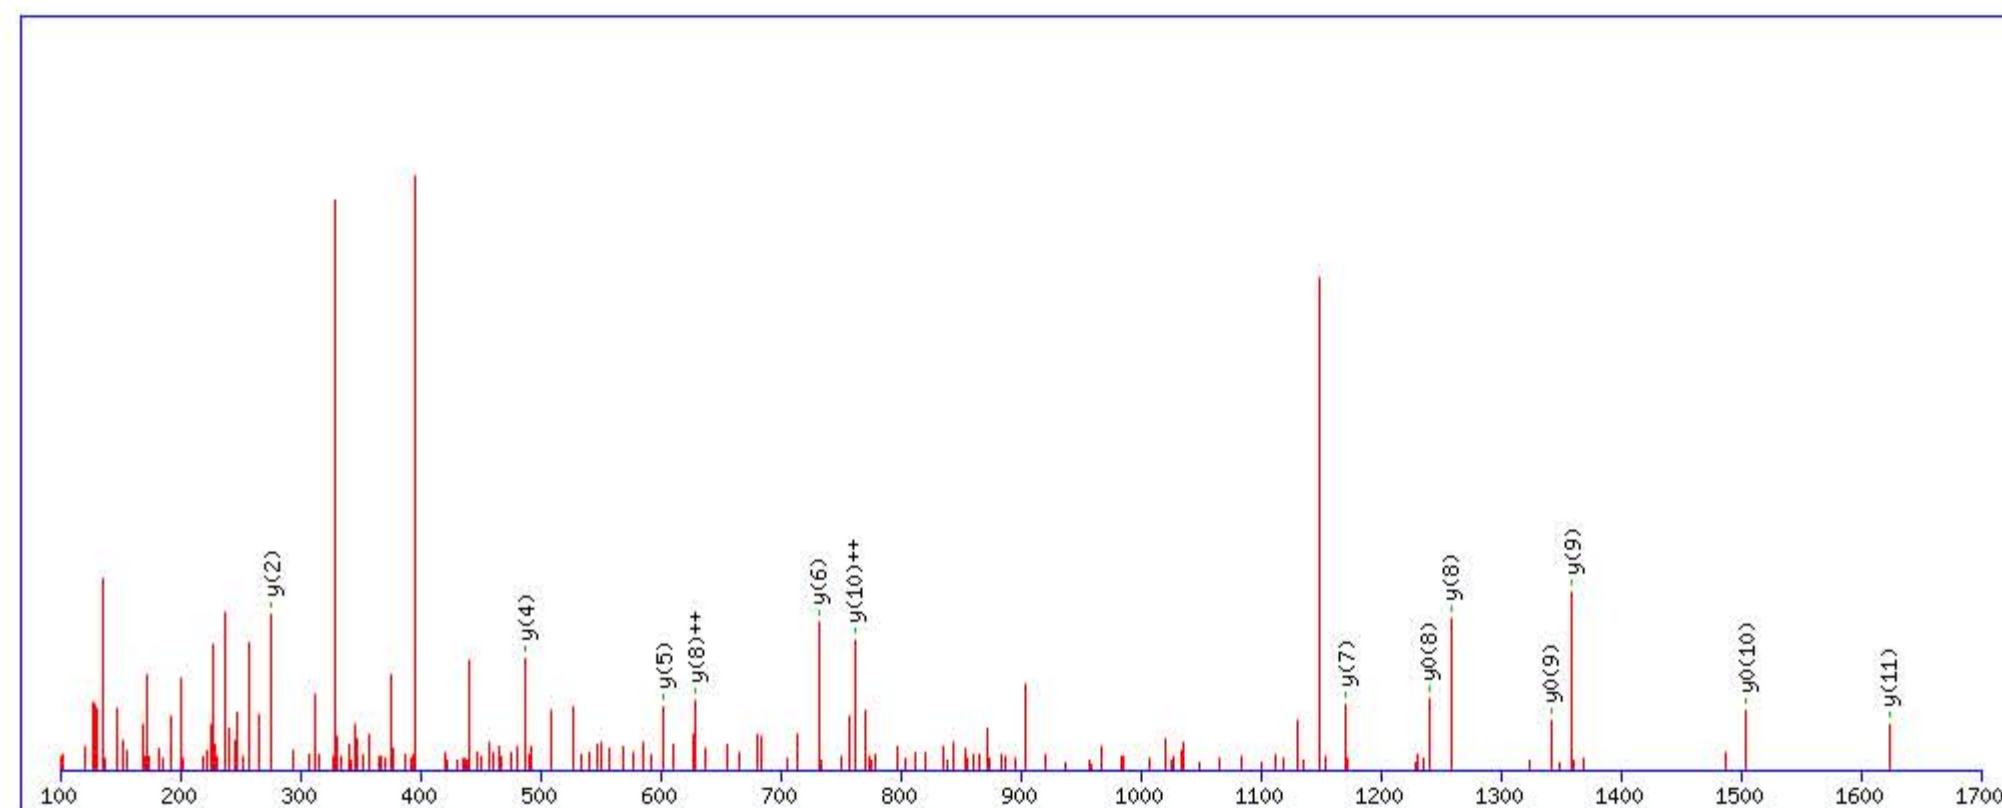

Monoisotopic mass of neutral peptide Mr(calc): 1721.854584

Fixed modifications: Carbamidomethyl (C) (apply to specified residues or termini only)

Variable modifications:

Q6 : Biotin:Thermo-21345 (Q)

Ions Score: 37 Expect: 0.0047

Matches : 13/118 fragment ions using 29 most intense peaks [\(help\)](#)

| #  | b           | b <sup>++</sup> | b <sup>+</sup> | b <sup>*++</sup> | b <sup>0</sup> | b <sup>0++</sup> | Seq. | y                  | y <sup>++</sup>   | y <sup>+</sup> | y <sup>*++</sup> | y <sup>0</sup>     | y <sup>0++</sup> | #  |
|----|-------------|-----------------|----------------|------------------|----------------|------------------|------|--------------------|-------------------|----------------|------------------|--------------------|------------------|----|
| 1  | 100.075690  | 50.541483       |                |                  |                |                  | V    |                    |                   |                |                  |                    |                  | 12 |
| 2  | 201.123369  | 101.065322      |                |                  | 183.112804     | 92.060040        | T    | <b>1623.793452</b> | 812.400364        | 1606.766903    | 803.887090       | 1605.782887        | 803.395081       | 11 |
| 3  | 364.186698  | 182.596987      |                |                  | 346.176133     | 173.591705       | Y    | 1522.745773        | <b>761.876524</b> | 1505.719224    | 753.363250       | <b>1504.735208</b> | 752.871242       | 10 |
| 4  | 465.234377  | 233.120827      |                |                  | 447.223812     | 224.115544       | T    | <b>1359.682444</b> | 680.344860        | 1342.655895    | 671.831585       | <b>1341.671879</b> | 671.339577       | 9  |
| 5  | 552.266405  | 276.636841      |                |                  | 534.255840     | 267.631558       | S    | <b>1258.634765</b> | <b>629.821021</b> | 1241.608216    | 621.307746       | <b>1240.624200</b> | 620.815738       | 8  |
| 6  | 991.491731  | 496.249504      | 974.465182     | 487.736229       | 973.481166     | 487.244221       | Q    | <b>1171.602737</b> | 586.305006        | 1154.576188    | 577.791732       | 1153.592172        | 577.299724       | 7  |
| 7  | 1120.534324 | 560.770800      | 1103.507775    | 552.257526       | 1102.523759    | 551.765517       | E    | <b>732.377411</b>  | 366.692343        | 715.350862     | 358.179069       | 714.366846         | 357.687061       | 6  |
| 8  | 1235.561267 | 618.284272      | 1218.534718    | 609.770997       | 1217.550702    | 609.278989       | D    | <b>603.334818</b>  | 302.171047        | 586.308269     | 293.657773       | 585.324253         | 293.165765       | 5  |
| 9  | 1348.645331 | 674.826303      | 1331.618782    | 666.313029       | 1330.634766    | 665.821021       | L    | <b>488.307875</b>  | 244.657575        | 471.281326     | 236.144301       | 470.297310         | 235.652293       | 4  |
| 10 | 1447.713745 | 724.360511      | 1430.687196    | 715.847236       | 1429.703180    | 715.355228       | V    | 375.223811         | 188.115543        | 358.197262     | 179.602269       | 357.213246         | 179.110261       | 3  |
| 11 | 1576.756338 | 788.881807      | 1559.729789    | 780.368533       | 1558.745773    | 779.876524       | E    | <b>276.155397</b>  | 138.581336        | 259.128848     | 130.068062       | 258.144832         | 129.576054       | 2  |
| 12 |             |                 |                |                  |                |                  | K    | 147.112804         | 74.060040         | 130.086255     | 65.546765        |                    |                  | 1  |

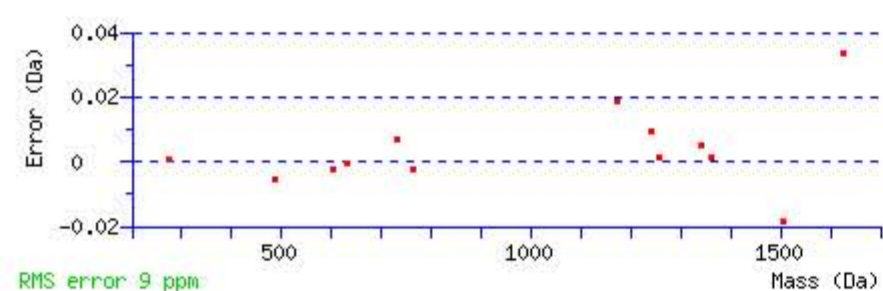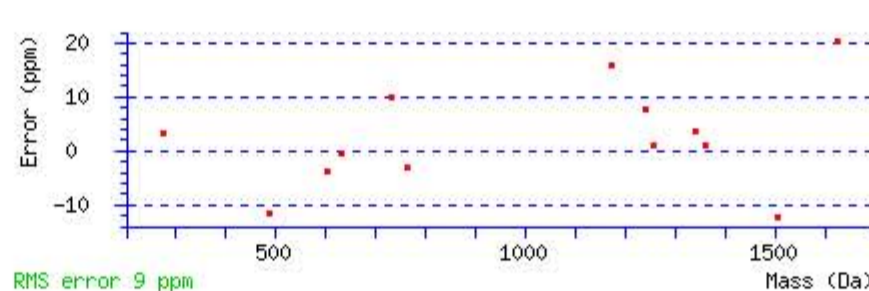

NCBI BLAST search of **VTYTSQEDLVEK**

(Parameters: blastp, nr protein database, expect=20000, no filter, PAM30)

Other BLAST [web gateways](#)

All matches to this query

| Score | Mr(calc):   | Delta    | Sequence                     |
|-------|-------------|----------|------------------------------|
| 37.0  | 1721.854584 | 0.001038 | <a href="#">VTYTSQEDLVEK</a> |

Mascot: <http://www.matrixscience.com/>

# MASCOT Search Results

## Peptide View

MS/MS Fragmentation of **AQLGDLPWQVAIK**

Found in **CFAI\_HUMAN**, Complement factor I OS=Homo sapiens GN=CFI PE=1 SV=2

Match to Query 34653: 1748.979588 from(875.497070,2+) rtinseconds(2664) index(64236)

Title: Locus:1.1.1.1838.10 File:"2013-07-02 CLN FXIII 180 min 3rd FT.wiff"

Data file C:\Program Files (x86)\Matrix Science\Mascot Daemon\mgf\9 FXIII 180 min 3rd\mascot\_daemon\_merge.mgf

Click mouse within plot area to zoom in by factor of two about that point

Or, Plot from 100 to 1900 Da Full range

Label all possible matches  Label matches used for scoring

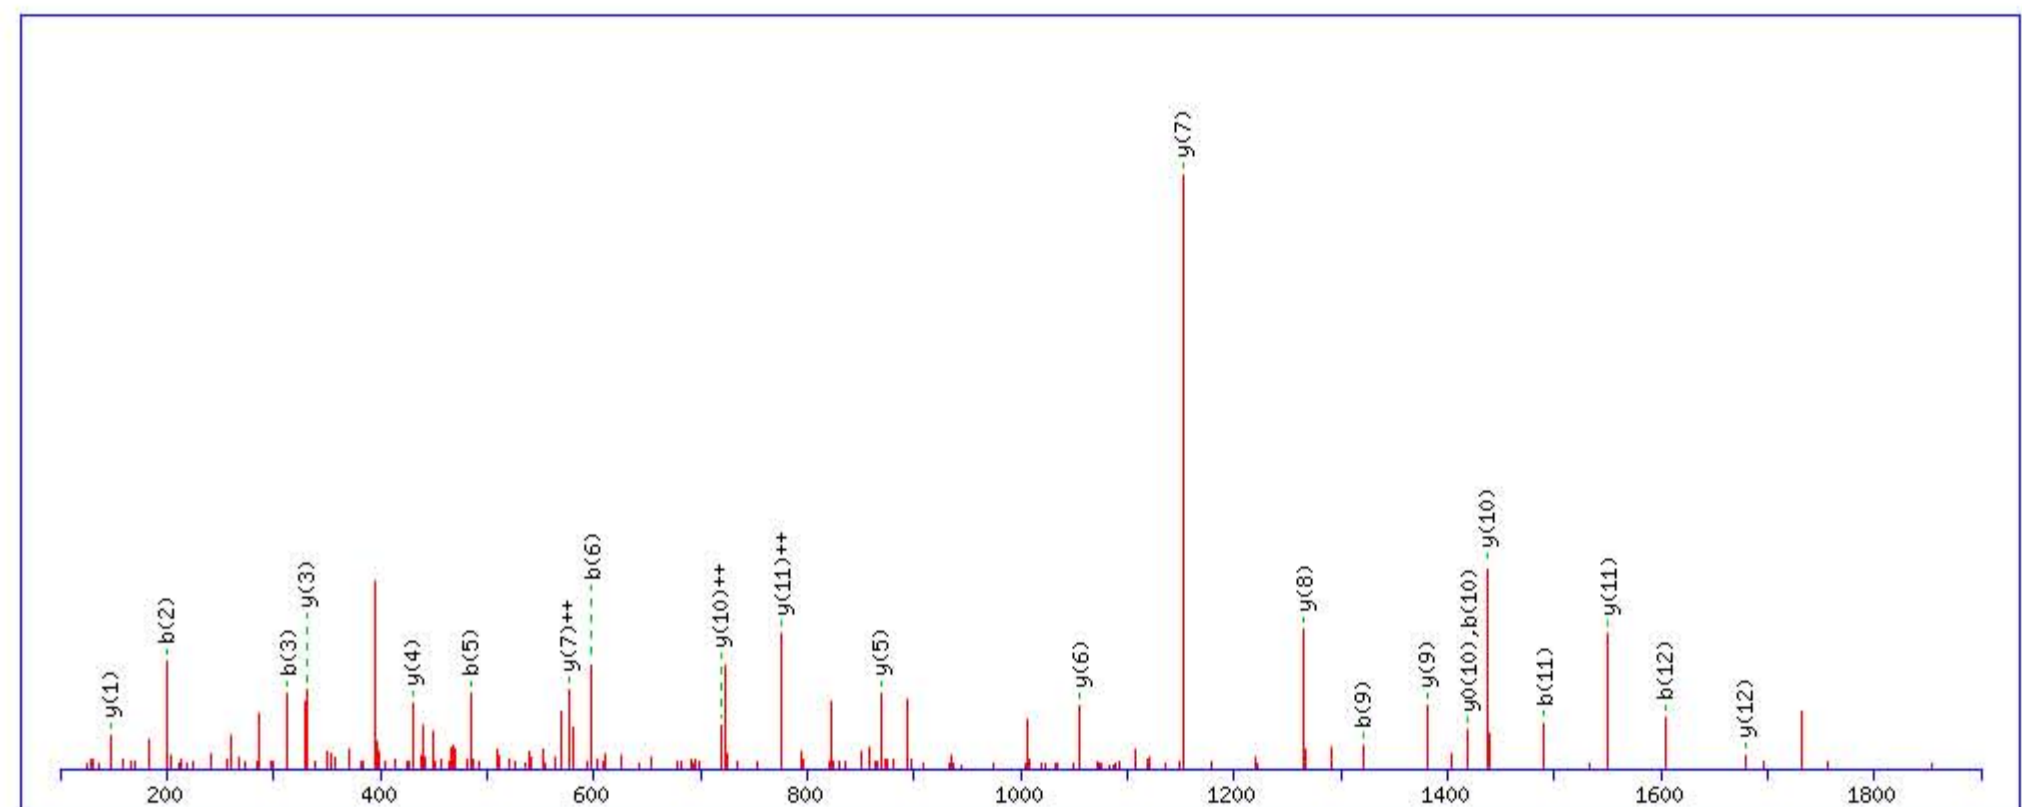

Monoisotopic mass of neutral peptide Mr(calc): 1748.964737

Fixed modifications: Carbamidomethyl (C) (apply to specified residues or termini only)

Variable modifications:

Q9 : Biotin:Thermo-21345 (Q)

Ions Score: 88 Expect: 1.5e-008

Matches : 23/118 fragment ions using 34 most intense peaks [\(help\)](#)

| #  | b                  | b <sup>++</sup> | b <sup>*</sup> | b <sup>+++</sup> | b <sup>0</sup> | b <sup>0++</sup> | Seq. | y                  | y <sup>++</sup>   | y <sup>*</sup> | y <sup>+++</sup> | y <sup>0</sup>     | y <sup>0++</sup> | #  |
|----|--------------------|-----------------|----------------|------------------|----------------|------------------|------|--------------------|-------------------|----------------|------------------|--------------------|------------------|----|
| 1  | 72.044390          | 36.525833       |                |                  |                |                  | A    |                    |                   |                |                  |                    |                  | 13 |
| 2  | <b>200.102968</b>  | 100.555122      | 183.076419     | 92.041848        |                |                  | Q    | <b>1678.934912</b> | 839.971094        | 1661.908363    | 831.457820       | 1660.924347        | 830.965812       | 12 |
| 3  | <b>313.187032</b>  | 157.097154      | 296.160483     | 148.583879       |                |                  | L    | <b>1550.876334</b> | <b>775.941805</b> | 1533.849785    | 767.428531       | 1532.865769        | 766.936523       | 11 |
| 4  | 370.208496         | 185.607886      | 353.181947     | 177.094611       |                |                  | G    | <b>1437.792270</b> | <b>719.399773</b> | 1420.765721    | 710.886499       | <b>1419.781705</b> | 710.394491       | 10 |
| 5  | <b>485.235439</b>  | 243.121357      | 468.208890     | 234.608083       | 467.224874     | 234.116075       | D    | <b>1380.770806</b> | 690.889041        | 1363.744257    | 682.375767       | 1362.760241        | 681.883759       | 9  |
| 6  | <b>598.319503</b>  | 299.663390      | 581.292954     | 291.150115       | 580.308938     | 290.658107       | L    | <b>1265.743863</b> | 633.375570        | 1248.717314    | 624.862295       |                    |                  | 8  |
| 7  | 695.372267         | 348.189772      | 678.345718     | 339.676497       | 677.361702     | 339.184489       | P    | <b>1152.659799</b> | <b>576.833538</b> | 1135.633250    | 568.320263       |                    |                  | 7  |
| 8  | 881.451580         | 441.229428      | 864.425031     | 432.716154       | 863.441015     | 432.224146       | W    | <b>1055.607035</b> | 528.307156        | 1038.580486    | 519.793881       |                    |                  | 6  |
| 9  | <b>1320.676906</b> | 660.842091      | 1303.650357    | 652.328817       | 1302.666341    | 651.836809       | Q    | <b>869.527722</b>  | 435.267499        | 852.501173     | 426.754225       |                    |                  | 5  |
| 10 | <b>1419.745320</b> | 710.376298      | 1402.718771    | 701.863024       | 1401.734755    | 701.371016       | V    | <b>430.302396</b>  | 215.654836        | 413.275847     | 207.141561       |                    |                  | 4  |
| 11 | <b>1490.782434</b> | 745.894855      | 1473.755885    | 737.381581       | 1472.771869    | 736.889573       | A    | <b>331.233982</b>  | 166.120629        | 314.207433     | 157.607354       |                    |                  | 3  |
| 12 | <b>1603.866498</b> | 802.436887      | 1586.839949    | 793.923613       | 1585.855933    | 793.431605       | I    | 260.196868         | 130.602072        | 243.170319     | 122.088797       |                    |                  | 2  |
| 13 |                    |                 |                |                  |                |                  | K    | <b>147.112804</b>  | 74.060040         | 130.086255     | 65.546765        |                    |                  | 1  |

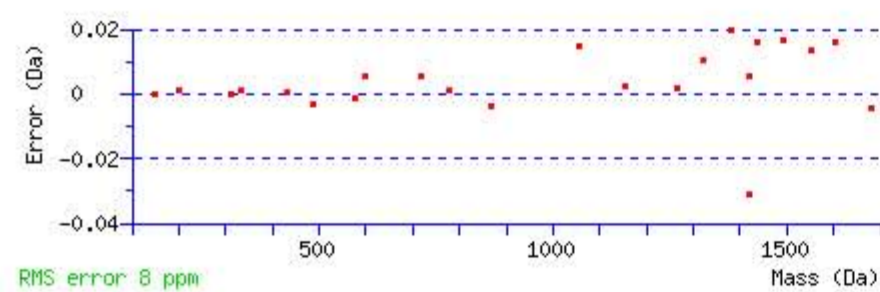

RMS error 8 ppm

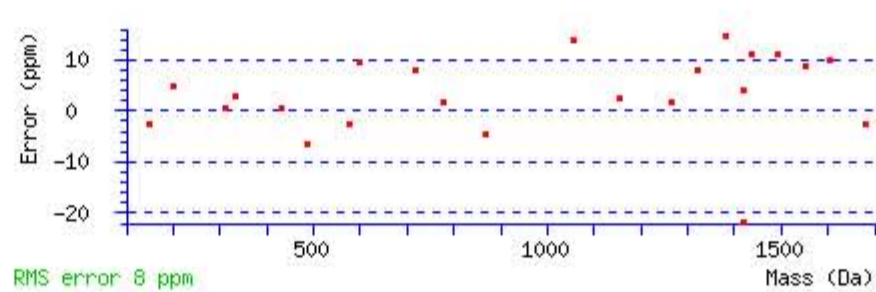

RMS error 8 ppm

NCBI BLAST search of **AQLGDLPWQVAIK**

(Parameters: blastp, nr protein database, expect=20000, no filter, PAM30)

Other BLAST [web gateways](#)

All matches to this query

| Score | Mr(calc):   | Delta     | Sequence                           |
|-------|-------------|-----------|------------------------------------|
| 88.0  | 1748.964737 | 0.014851  | <a href="#">AQLGDLPWQVAIK</a>      |
| 7.7   | 1748.964737 | 0.014851  | <a href="#">AQLGDLPWQVAIK</a>      |
| 4.3   | 1748.978439 | 0.001149  | <a href="#">YARKISGTTALQEALK</a>   |
| 3.2   | 1748.985840 | -0.006252 | <a href="#">LPLGSLMKSPHLES LK</a>  |
| 2.1   | 1748.964523 | 0.015065  | <a href="#">AAAALSLAHRLLDGAGSR</a> |
| 2.1   | 1748.958649 | 0.020939  | <a href="#">AYIRRQINHIFYR</a>      |
| 1.8   | 1748.987183 | -0.007595 | <a href="#">QPARSRLWLPSK</a>       |
| 0.3   | 1748.989685 | -0.010097 | <a href="#">KALSEHNVLVVEGARK</a>   |
| 0.1   | 1748.957336 | 0.022252  | <a href="#">LTYQFDSALLPAVRR</a>    |

# MASCOT Search Results

## Peptide View

MS/MS Fragmentation of **TMGYQDFADVVCYTQK**

Found in **CFAI\_HUMAN**, Complement factor I OS=Homo sapiens GN=CFI PE=1 SV=2

Match to Query 43883: 2236.018692 from(746.346840,3+) rtinseconds(2590) index(63761)

Title: Locus:1.1.1.1813.12 File:"2013-07-02 CLN FXIII 180 min 3rd FT.wiff"

Data file C:\Program Files (x86)\Matrix Science\Mascot Daemon\mgf\9 FXIII 180 min 3rd\mascot\_daemon\_merge.mgf

Click mouse within plot area to zoom in by factor of two about that point

Or, Plot from  to  Da

Label all possible matches  Label matches used for scoring

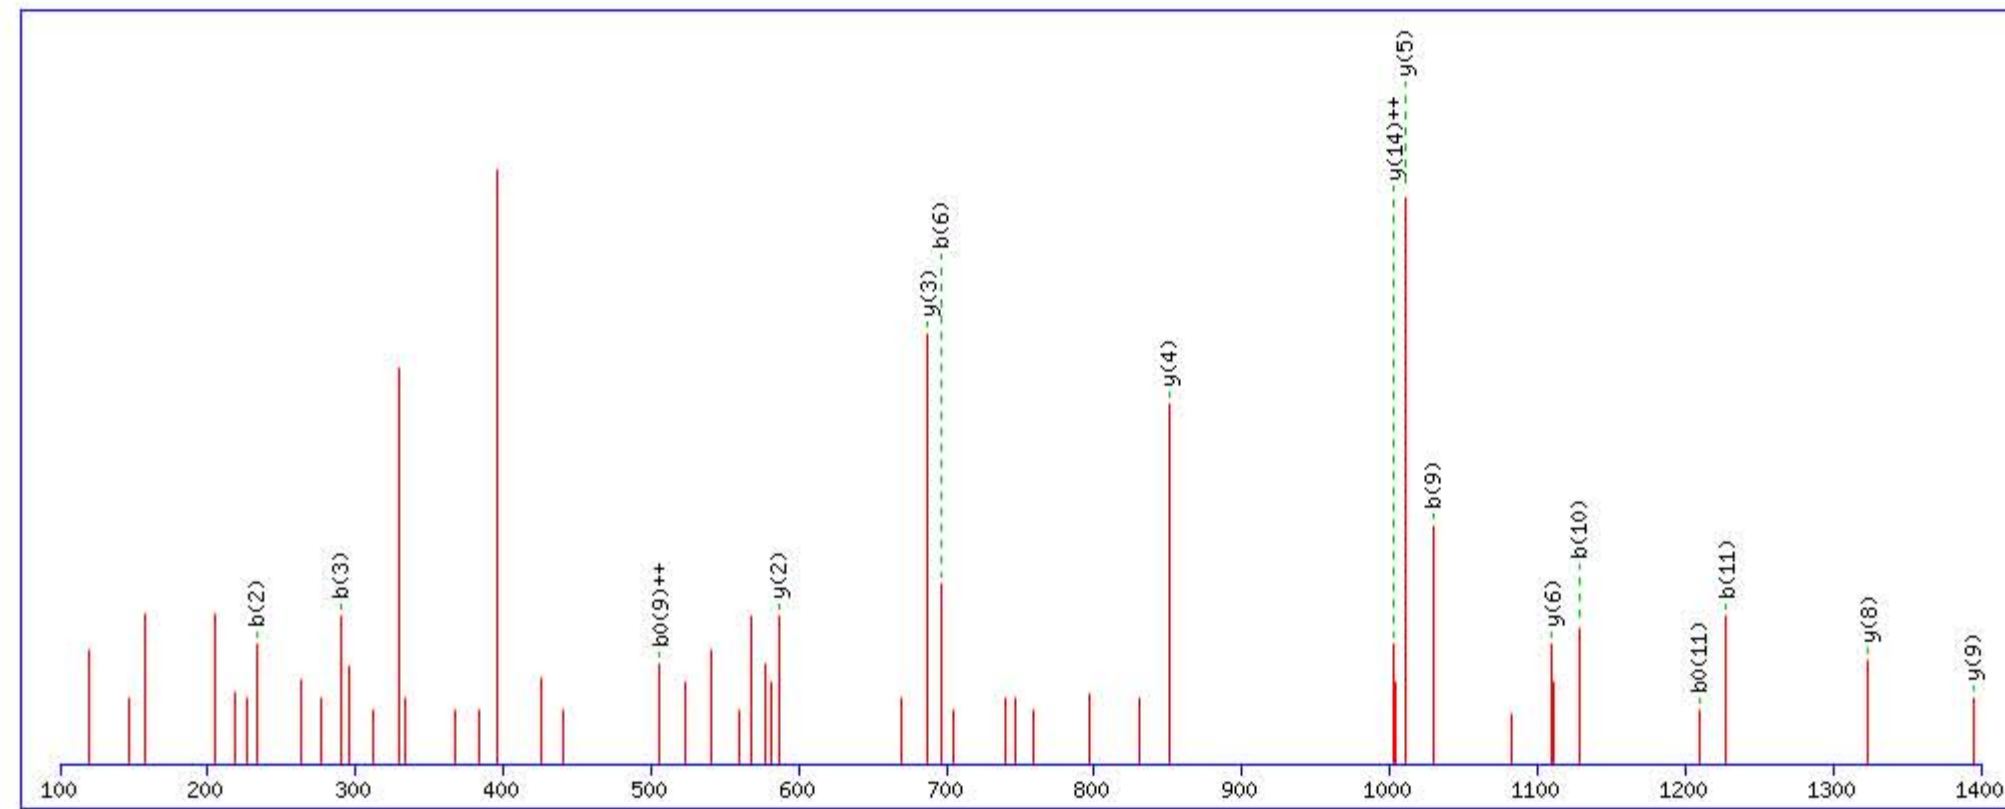

Monoisotopic mass of neutral peptide Mr(calc): 2236.000305

Fixed modifications: Carbamidomethyl (C) (apply to specified residues or termini only)

Variable modifications:

Q15 : Biotin:Thermo-21345 (Q)

Ions Score: 49 Expect: 0.00013

Matches : 16/168 fragment ions using 25 most intense peaks [\(help\)](#)

| #  | b                  | b <sup>++</sup> | b <sup>*</sup> | b <sup>+++</sup> | b <sup>0</sup>     | b <sup>0++</sup>  | Seq. | y                  | y <sup>++</sup>    | y <sup>*</sup> | y <sup>+++</sup> | y <sup>0</sup> | y <sup>0++</sup> | #  |
|----|--------------------|-----------------|----------------|------------------|--------------------|-------------------|------|--------------------|--------------------|----------------|------------------|----------------|------------------|----|
| 1  | 102.054955         | 51.531116       |                |                  | 84.044390          | 42.525833         | T    |                    |                    |                |                  |                |                  | 16 |
| 2  | <b>233.095440</b>  | 117.051358      |                |                  | 215.084875         | 108.046076        | M    | 2135.959885        | 1068.483580        | 2118.933336    | 1059.970306      | 2117.949320    | 1059.478298      | 15 |
| 3  | <b>290.116904</b>  | 145.562090      |                |                  | 272.106339         | 136.556807        | G    | 2004.919400        | <b>1002.963338</b> | 1987.892851    | 994.450064       | 1986.908835    | 993.958056       | 14 |
| 4  | 453.180233         | 227.093754      |                |                  | 435.169668         | 218.088472        | Y    | 1947.897936        | 974.452606         | 1930.871387    | 965.939332       | 1929.887371    | 965.447324       | 13 |
| 5  | 581.238811         | 291.123044      | 564.212262     | 282.609769       | 563.228246         | 282.117761        | Q    | 1784.834607        | 892.920942         | 1767.808058    | 884.407667       | 1766.824042    | 883.915659       | 12 |
| 6  | <b>696.265754</b>  | 348.636515      | 679.239205     | 340.123241       | 678.255189         | 339.631233        | D    | 1656.776029        | 828.891653         | 1639.749480    | 820.378378       | 1638.765464    | 819.886370       | 11 |
| 7  | 843.334168         | 422.170722      | 826.307619     | 413.657447       | 825.323603         | 413.165439        | F    | 1541.749086        | 771.378181         | 1524.722537    | 762.864907       | 1523.738521    | 762.372899       | 10 |
| 8  | 914.371282         | 457.689279      | 897.344733     | 449.176004       | 896.360717         | 448.683996        | A    | <b>1394.680672</b> | 697.843974         | 1377.654123    | 689.330700       | 1376.670107    | 688.838692       | 9  |
| 9  | <b>1029.398225</b> | 515.202750      | 1012.371676    | 506.689476       | 1011.387660        | <b>506.197468</b> | D    | <b>1323.643558</b> | 662.325417         | 1306.617009    | 653.812143       | 1305.632993    | 653.320135       | 8  |
| 10 | <b>1128.466639</b> | 564.736958      | 1111.440090    | 556.223683       | 1110.456074        | 555.731675        | V    | 1208.616615        | 604.811946         | 1191.590066    | 596.298671       | 1190.606050    | 595.806663       | 7  |
| 11 | <b>1227.535053</b> | 614.271165      | 1210.508504    | 605.757890       | <b>1209.524488</b> | 605.265882        | V    | <b>1109.548201</b> | 555.277739         | 1092.521652    | 546.764464       | 1091.537636    | 546.272456       | 6  |
| 12 | 1387.565702        | 694.286489      | 1370.539153    | 685.773215       | 1369.555137        | 685.281207        | C    | <b>1010.479787</b> | 505.743532         | 993.453238     | 497.230257       | 992.469222     | 496.738249       | 5  |
| 13 | 1550.629031        | 775.818154      | 1533.602482    | 767.304879       | 1532.618466        | 766.812871        | Y    | <b>850.449138</b>  | 425.728207         | 833.422589     | 417.214933       | 832.438573     | 416.722925       | 4  |
| 14 | 1651.676710        | 826.341993      | 1634.650161    | 817.828719       | 1633.666145        | 817.336711        | T    | <b>687.385809</b>  | 344.196543         | 670.359260     | 335.683268       | 669.375244     | 335.191260       | 3  |
| 15 | 2090.902036        | 1045.954656     | 2073.875487    | 1037.441381      | 2072.891471        | 1036.949373       | Q    | <b>586.338130</b>  | 293.672703         | 569.311581     | 285.159429       |                |                  | 2  |
| 16 |                    |                 |                |                  |                    |                   | K    | 147.112804         | 74.060040          | 130.086255     | 65.546765        |                |                  | 1  |

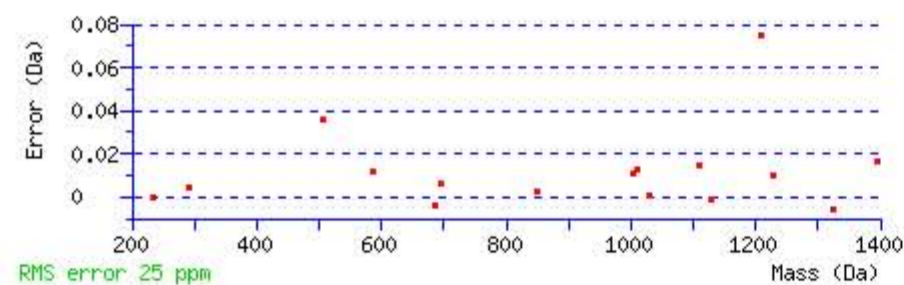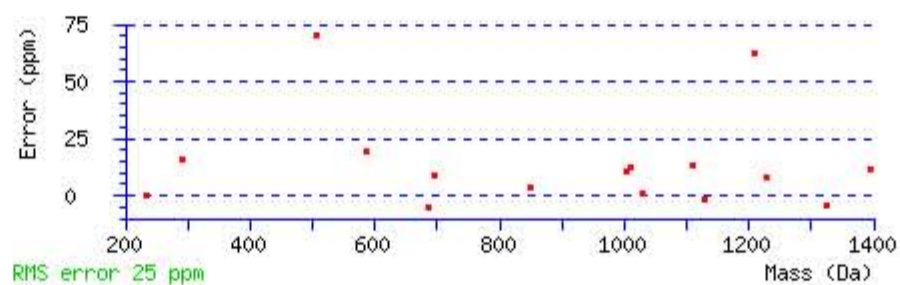

NCBI BLAST search of **TMGYQDFADVVCYTQK**

(Parameters: blastp, nr protein database, expect=20000, no filter, PAM30)

Other BLAST [web gateways](#)

All matches to this query

| Score | Mr(calc):   | Delta    | Sequence                         |
|-------|-------------|----------|----------------------------------|
| 49.5  | 2236.000305 | 0.018387 | <a href="#">TMGYQDFADVVCYTQK</a> |

Mascot: <http://www.matrixscience.com/>

# MASCOT SEARCH RESULTS

## Peptide View

MS/MS Fragmentation of **EANVACLDLGFQQGADTQR**

Found in **CFAI\_HUMAN**, Complement factor I OS=Homo sapiens GN=CFI PE=1 SV=2

Match to Query 46509: 2403.142032 from(802.054620,3+) rtinseconds(2285) index(62174)  
Title: Locus:1.1.1.1707.10 File:"2013-07-02 CLN FXIII 180 min 3rd FT.wiff"  
Data file C:\Program Files (x86)\Matrix Science\Mascot Daemon\mgf9 FXIII 180 min 3rd\mascot\_daemon\_merge.mgf

Click mouse within plot area to zoom in by factor of two about that point  
Or, Plot from 0 to 3000 Da Full range  
Label all possible matches  Label matches used for scoring

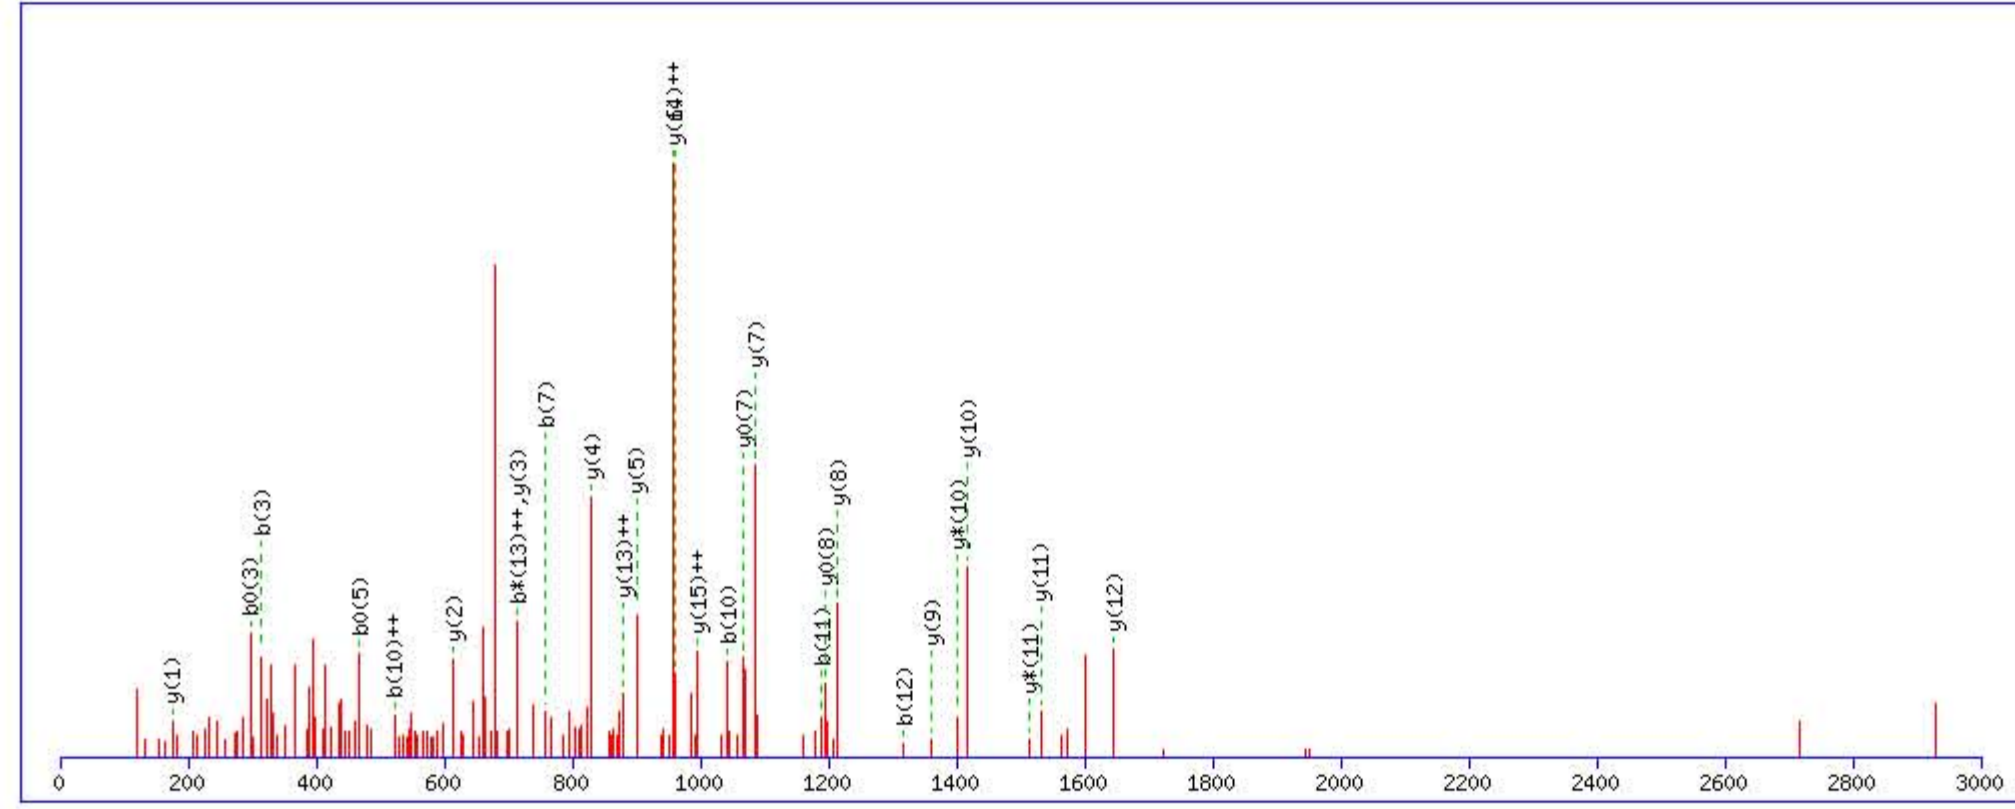

Monoisotopic mass of neutral peptide Mr(calc): 2403.131119  
Fixed modifications: Carbamidomethyl (C) (apply to specified residues or termini only)  
Variable modifications:  
Q18 : Biotin:Thermo-21345 (Q)  
Ions Score: 72 Expect: 2.8e-007  
Matches : 28/208 fragment ions using 45 most intense peaks [\(help\)](#)

| #  | b                  | b <sup>++</sup>   | b <sup>*</sup> | b <sup>*++</sup>  | b <sup>0</sup>    | b <sup>0++</sup> | Seq. | y                  | y <sup>++</sup>   | y <sup>*</sup>     | y <sup>*++</sup> | y <sup>0</sup>     | y <sup>0++</sup> | #  |
|----|--------------------|-------------------|----------------|-------------------|-------------------|------------------|------|--------------------|-------------------|--------------------|------------------|--------------------|------------------|----|
| 1  | 130.049869         | 65.528572         |                |                   | 112.039304        | 56.523290        | E    |                    |                   |                    |                  |                    |                  | 19 |
| 2  | 201.086983         | 101.047130        |                |                   | 183.076418        | 92.041847        | A    | 2275.095801        | 1138.051538       | 2258.069252        | 1129.538264      | 2257.085236        | 1129.046256      | 18 |
| 3  | <b>315.129910</b>  | 158.068593        | 298.103361     | 149.555319        | <b>297.119345</b> | 149.063311       | N    | 2204.058687        | 1102.532981       | 2187.032138        | 1094.019707      | 2186.048122        | 1093.527699      | 17 |
| 4  | 414.198324         | 207.602800        | 397.171775     | 199.089526        | 396.187759        | 198.597518       | V    | 2090.015760        | 1045.511518       | 2072.989211        | 1036.998243      | 2072.005195        | 1036.506235      | 16 |
| 5  | 485.235438         | 243.121357        | 468.208889     | 234.608082        | <b>467.224873</b> | 234.116075       | A    | 1990.947346        | <b>995.977311</b> | 1973.920797        | 987.464037       | 1972.936781        | 986.972029       | 15 |
| 6  | 645.266087         | 323.136682        | 628.239538     | 314.623407        | 627.255522        | 314.131399       | C    | 1919.910232        | <b>960.458754</b> | 1902.883683        | 951.945480       | 1901.899667        | 951.453472       | 14 |
| 7  | <b>758.350151</b>  | 379.678714        | 741.323602     | 371.165439        | 740.339586        | 370.673431       | L    | 1759.879583        | <b>880.443430</b> | 1742.853034        | 871.930155       | 1741.869018        | 871.438147       | 13 |
| 8  | 873.377094         | 437.192185        | 856.350545     | 428.678911        | 855.366529        | 428.186903       | D    | <b>1646.795519</b> | 823.901398        | 1629.768970        | 815.388123       | 1628.784954        | 814.896115       | 12 |
| 9  | 986.461158         | 493.734217        | 969.434609     | 485.220943        | 968.450593        | 484.728935       | L    | <b>1531.768576</b> | 766.387926        | <b>1514.742027</b> | 757.874652       | 1513.758011        | 757.382644       | 11 |
| 10 | <b>1043.482622</b> | <b>522.244949</b> | 1026.456073    | 513.731675        | 1025.472057       | 513.239667       | G    | <b>1418.684512</b> | 709.845894        | <b>1401.657963</b> | 701.332620       | 1400.673947        | 700.840612       | 10 |
| 11 | <b>1190.551036</b> | 595.779156        | 1173.524487    | 587.265882        | 1172.540471       | 586.773874       | F    | <b>1361.663048</b> | 681.335162        | 1344.636499        | 672.821888       | 1343.652483        | 672.329880       | 9  |
| 12 | <b>1318.609614</b> | 659.808445        | 1301.583065    | 651.295171        | 1300.599049       | 650.803163       | Q    | <b>1214.594634</b> | 607.800955        | 1197.568085        | 599.287681       | <b>1196.584069</b> | 598.795673       | 8  |
| 13 | 1446.668192        | 723.837734        | 1429.641643    | <b>715.324460</b> | 1428.657627       | 714.832452       | Q    | <b>1086.536056</b> | 543.771666        | 1069.509507        | 535.258392       | <b>1068.525491</b> | 534.766384       | 7  |
| 14 | 1503.689656        | 752.348466        | 1486.663107    | 743.835192        | 1485.679091       | 743.343184       | G    | <b>958.477478</b>  | 479.742377        | 941.450929         | 471.229103       | 940.466913         | 470.737095       | 6  |
| 15 | 1574.726770        | 787.867023        | 1557.700221    | 779.353749        | 1556.716205       | 778.861741       | A    | <b>901.456014</b>  | 451.231645        | 884.429465         | 442.718371       | 883.445449         | 442.226363       | 5  |
| 16 | 1689.753713        | 845.380495        | 1672.727164    | 836.867220        | 1671.743148       | 836.375212       | D    | <b>830.418900</b>  | 415.713088        | 813.392351         | 407.199814       | 812.408335         | 406.707806       | 4  |
| 17 | 1790.801392        | 895.904334        | 1773.774843    | 887.391060        | 1772.790827       | 886.899052       | T    | <b>715.391957</b>  | 358.199617        | 698.365408         | 349.686342       | 697.381392         | 349.194334       | 3  |
| 18 | 2230.026718        | 1115.516997       | 2213.000169    | 1107.003722       | 2212.016153       | 1106.511714      | Q    | <b>614.344278</b>  | 307.675777        | 597.317729         | 299.162503       |                    |                  | 2  |
| 19 |                    |                   |                |                   |                   |                  | R    | <b>175.118952</b>  | 88.063114         | 158.092403         | 79.549839        |                    |                  | 1  |

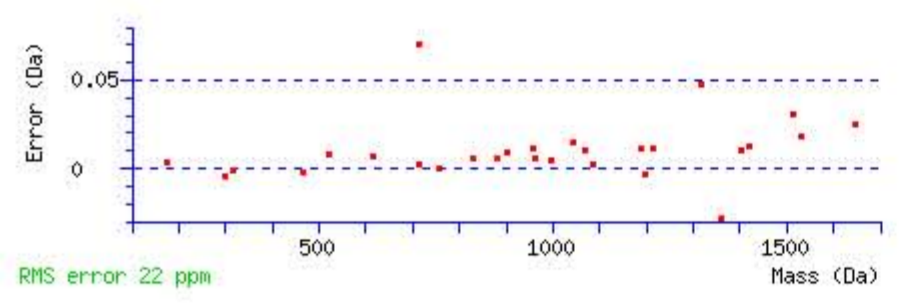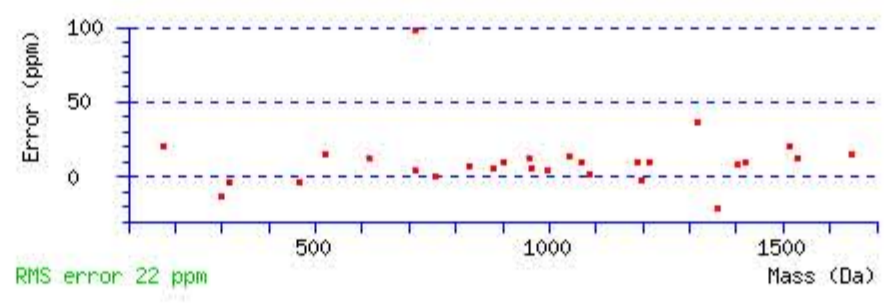

NCBI BLAST search of **EANVACLDLGFQQGADTQR**  
(Parameters: blastp, nr protein database, expect=20000, no filter, PAM30)  
Other BLAST [web gateways](#)

### All matches to this query

| Score | Mr(calc):   | Delta     | Sequence                            |
|-------|-------------|-----------|-------------------------------------|
| 72.4  | 2403.131119 | 0.010913  | <a href="#">EANVACLDLGFQQGADTQR</a> |
| 26.8  | 2403.131119 | 0.010913  | <a href="#">EANVACLDLGFQQGADTQR</a> |
| 17.6  | 2403.131119 | 0.010913  | <a href="#">EANVACLDLGFQQGADTQR</a> |
| 2.5   | 2403.157135 | -0.015103 | <a href="#">QAMMKIDFPGDLGSQR</a>    |



# MASCOT Search Results

## Peptide View

MS/MS Fragmentation of **TLGDQLSLLGAR**

Found in **MRC2\_HUMAN**, C-type mannose receptor 2 OS=Homo sapiens GN=MRC2 PE=1 SV=2

Match to Query 33008: 1666.944188 from(834.479370,2+) rtinseconds(3000) index(38081)

Title: Locus:1.1.1.3705.10 File:"2013-07-02 CLN FXIII 180 min 3rd F 3.wiff"

Data file C:\Program Files (x86)\Matrix Science\Mascot Daemon\mgf\9 FXIII 180 min 3rd\mascot\_daemon\_merge.mgf

Click mouse within plot area to zoom in by factor of two about that point

Or, Plot from  to  Da

Label all possible matches  Label matches used for scoring

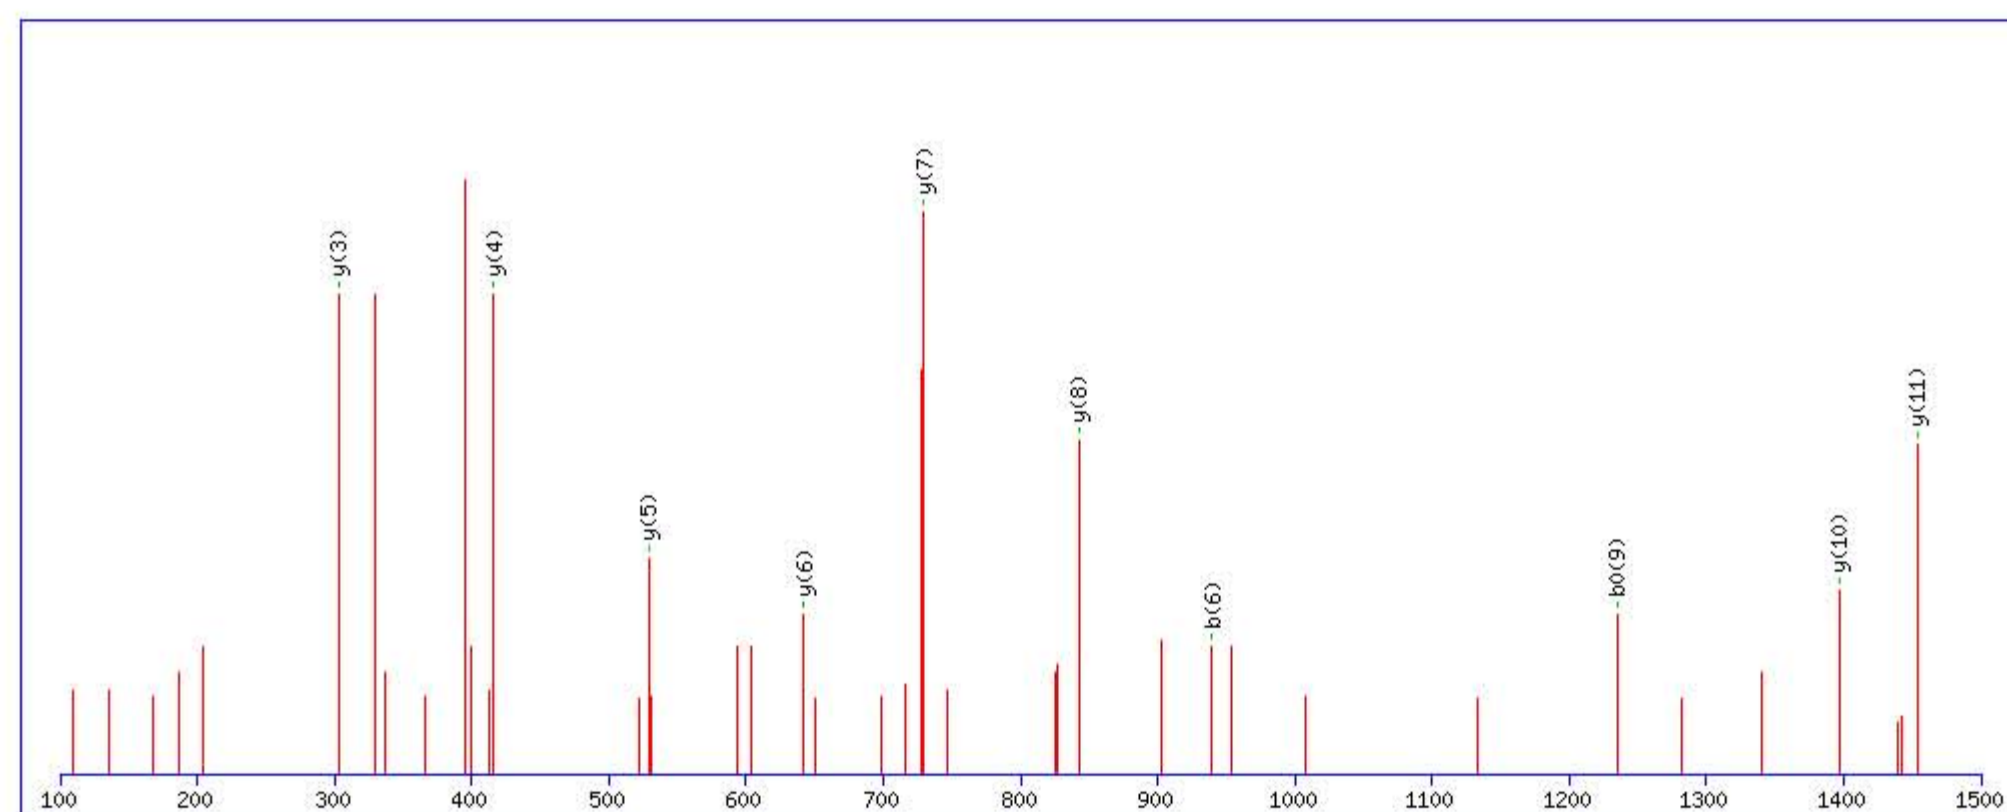

Monoisotopic mass of neutral peptide Mr(calc): 1666.944000

Fixed modifications: Carbamidomethyl (C) (apply to specified residues or termini only)

Variable modifications:

Q5 : Biotin:Thermo-21345 (Q)

Ions Score: 66 Expect: 3.6e-006

Matches : 10/124 fragment ions using 13 most intense peaks [\(help\)](#)

| #  | b                 | b <sup>++</sup> | b <sup>*</sup> | b <sup>*++</sup> | b <sup>0</sup>     | b <sup>0++</sup> | Seq. | y                  | y <sup>++</sup> | y <sup>*</sup> | y <sup>*++</sup> | y <sup>0</sup> | y <sup>0++</sup> | #  |
|----|-------------------|-----------------|----------------|------------------|--------------------|------------------|------|--------------------|-----------------|----------------|------------------|----------------|------------------|----|
| 1  | 102.054955        | 51.531116       |                |                  | 84.044390          | 42.525833        | T    |                    |                 |                |                  |                |                  | 13 |
| 2  | 215.139019        | 108.073147      |                |                  | 197.128454         | 99.067865        | L    | 1566.903611        | 783.955443      | 1549.877062    | 775.442169       | 1548.893046    | 774.950161       | 12 |
| 3  | 272.160483        | 136.583879      |                |                  | 254.149918         | 127.578597       | G    | <b>1453.819547</b> | 727.413411      | 1436.792998    | 718.900137       | 1435.808982    | 718.408129       | 11 |
| 4  | 387.187426        | 194.097351      |                |                  | 369.176861         | 185.092069       | D    | <b>1396.798083</b> | 698.902679      | 1379.771534    | 690.389405       | 1378.787518    | 689.897397       | 10 |
| 5  | 826.412752        | 413.710014      | 809.386203     | 405.196740       | 808.402187         | 404.704732       | Q    | 1281.771140        | 641.389208      | 1264.744591    | 632.875933       | 1263.760575    | 632.383925       | 9  |
| 6  | <b>939.496816</b> | 470.252046      | 922.470267     | 461.738772       | 921.486251         | 461.246764       | L    | <b>842.545814</b>  | 421.776545      | 825.519265     | 413.263270       | 824.535249     | 412.771262       | 8  |
| 7  | 1026.528844       | 513.768060      | 1009.502295    | 505.254786       | 1008.518279        | 504.762778       | S    | <b>729.461750</b>  | 365.234513      | 712.435201     | 356.721238       | 711.451185     | 356.229230       | 7  |
| 8  | 1139.612908       | 570.310092      | 1122.586359    | 561.796818       | 1121.602343        | 561.304810       | L    | <b>642.429722</b>  | 321.718499      | 625.403173     | 313.205224       |                |                  | 6  |
| 9  | 1252.696972       | 626.852124      | 1235.670423    | 618.338850       | <b>1234.686407</b> | 617.846841       | L    | <b>529.345658</b>  | 265.176467      | 512.319109     | 256.663192       |                |                  | 5  |
| 10 | 1365.781036       | 683.394156      | 1348.754487    | 674.880881       | 1347.770471        | 674.388873       | L    | <b>416.261594</b>  | 208.634435      | 399.235045     | 200.121160       |                |                  | 4  |
| 11 | 1422.802500       | 711.904888      | 1405.775951    | 703.391613       | 1404.791935        | 702.899605       | G    | <b>303.177530</b>  | 152.092403      | 286.150981     | 143.579128       |                |                  | 3  |
| 12 | 1493.839614       | 747.423445      | 1476.813065    | 738.910170       | 1475.829049        | 738.418162       | A    | 246.156066         | 123.581671      | 229.129517     | 115.068396       |                |                  | 2  |
| 13 |                   |                 |                |                  |                    |                  | R    | 175.118952         | 88.063114       | 158.092403     | 79.549839        |                |                  | 1  |

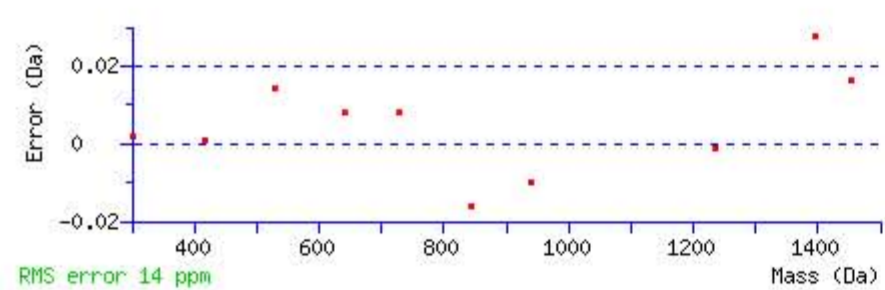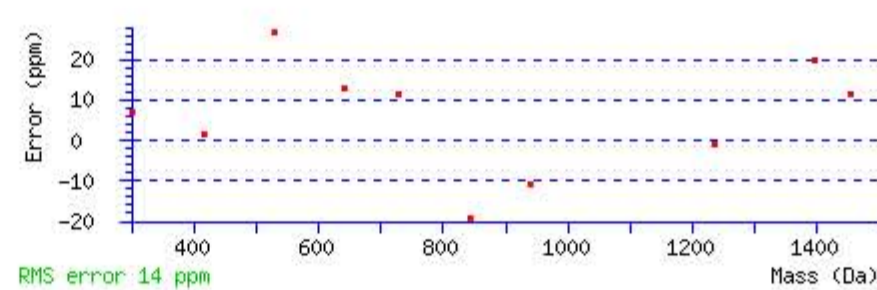

NCBI BLAST search of **TLGDQLSLLGAR**

(Parameters: blastp, nr protein database, expect=20000, no filter, PAM30)

Other BLAST [web gateways](#)

All matches to this query

| Score | Mr(calc):   | Delta     | Sequence                          |
|-------|-------------|-----------|-----------------------------------|
| 65.6  | 1666.944000 | 0.000188  | <a href="#">TLGDQLSLLGAR</a>      |
| 14.7  | 1666.926697 | 0.017491  | <a href="#">HSELVHVHAE LLRK</a>   |
| 2.1   | 1666.955231 | -0.011043 | <a href="#">RLGIPECILLVTQR</a>    |
| 1.6   | 1666.944016 | 0.000172  | <a href="#">LTNSPTVIVMVGLPAR</a>  |
| 0.5   | 1666.955215 | -0.011027 | <a href="#">DLESVQRLLRK</a>       |
| 0.2   | 1666.925354 | 0.018834  | <a href="#">KAEPLASGKGEPVSLGK</a> |

# MASCOT Search Results

## Peptide View

MS/MS Fragmentation of **LTLEQIDLIR**

Found in **DPEP2\_HUMAN**, Dipeptidase 2 OS=Homo sapiens GN=DPEP2 PE=1 SV=2

Match to Query 27987: 1523.871668 from(762.943110,2+) rtinseconds(2601) index(35204)

Title: Locus:1.1.1.3569.16 File:"2013-07-02 CLN FXIII 180 min 3rd F 3.wiff"

Data file C:\Program Files (x86)\Matrix Science\Mascot Daemon\mgf9 FXIII 180 min 3rd\mascot\_daemon\_merge.mgf

Click mouse within plot area to zoom in by factor of two about that point

Or, Plot from  to  Da

Label all possible matches  Label matches used for scoring

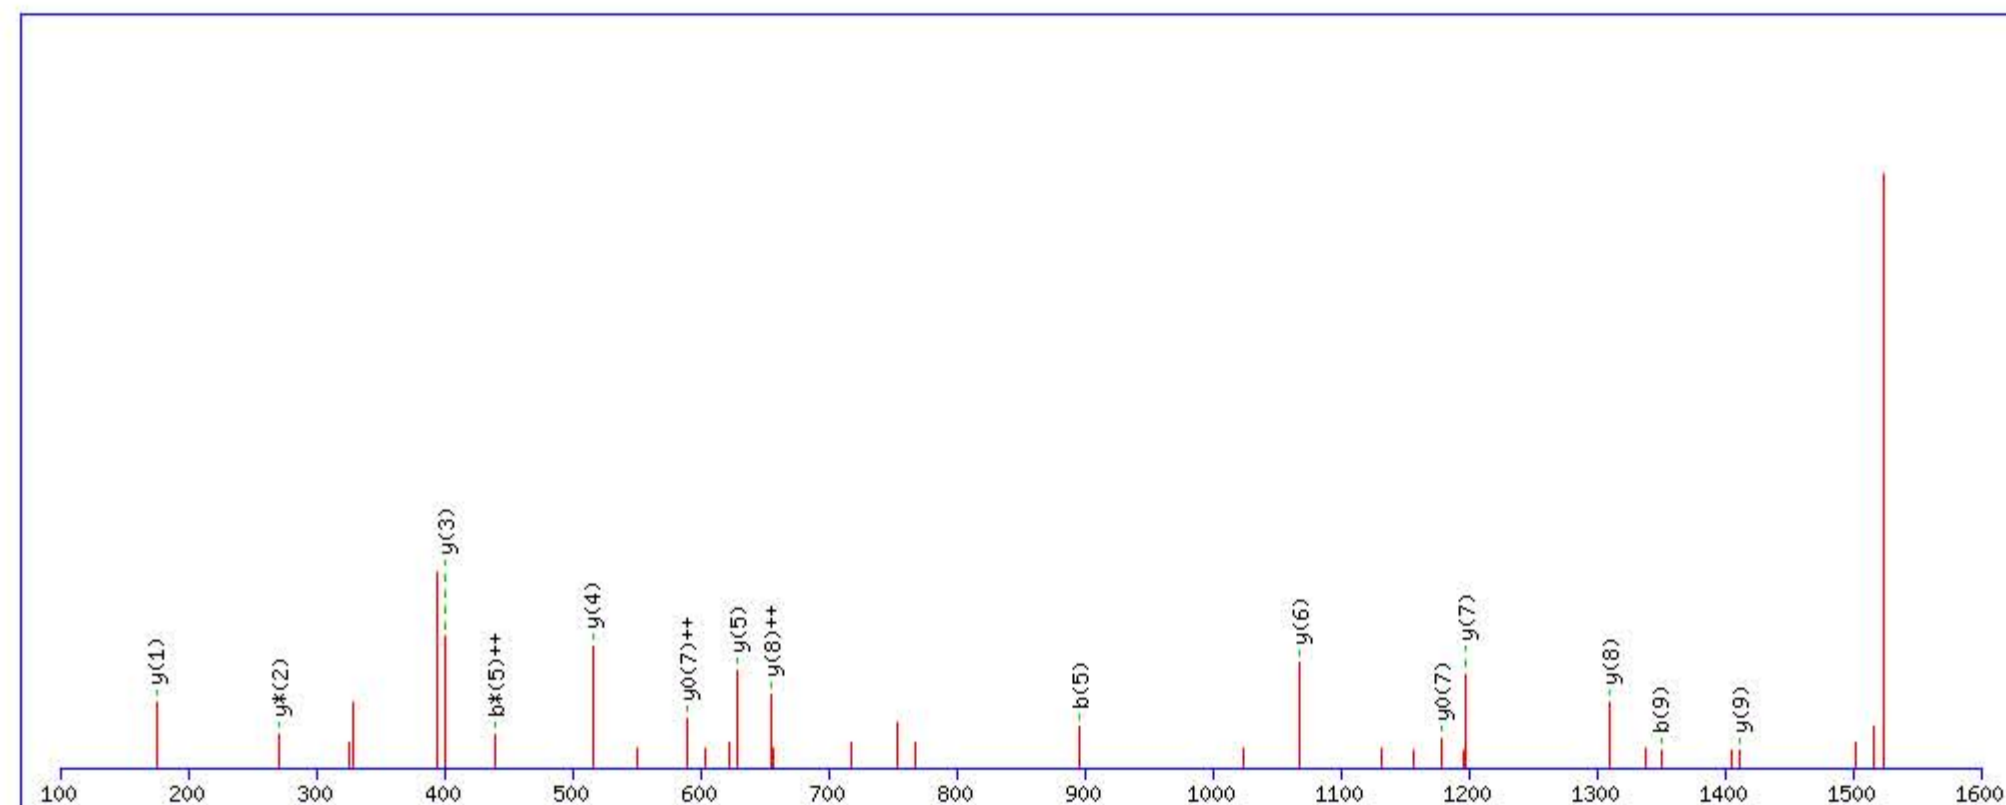

Monoisotopic mass of neutral peptide Mr(calc): 1523.874512

Fixed modifications: Carbamidomethyl (C) (apply to specified residues or termini only)

Variable modifications:

Q5 : Biotin:Thermo-21345 (Q)

Ions Score: 49 Expect: 0.00016

Matches : 15/92 fragment ions using 30 most intense peaks [\(help\)](#)

| #  | b           | b <sup>++</sup> | b <sup>*</sup> | b <sup>*++</sup> | b <sup>0</sup> | b <sup>0++</sup> | Seq. | y           | y <sup>++</sup> | y <sup>*</sup> | y <sup>*++</sup> | y <sup>0</sup> | y <sup>0++</sup> | #  |
|----|-------------|-----------------|----------------|------------------|----------------|------------------|------|-------------|-----------------|----------------|------------------|----------------|------------------|----|
| 1  | 114.091340  | 57.549308       |                |                  |                |                  | L    |             |                 |                |                  |                |                  | 10 |
| 2  | 215.139019  | 108.073147      |                |                  | 197.128454     | 99.067865        | T    | 1411.797749 | 706.402513      | 1394.771200    | 697.889238       | 1393.787184    | 697.397230       | 9  |
| 3  | 328.223083  | 164.615179      |                |                  | 310.212518     | 155.609897       | L    | 1310.750070 | 655.878673      | 1293.723521    | 647.365399       | 1292.739505    | 646.873391       | 8  |
| 4  | 457.265676  | 229.136476      |                |                  | 439.255111     | 220.131193       | E    | 1197.666006 | 599.336641      | 1180.639457    | 590.823367       | 1179.655441    | 590.331358       | 7  |
| 5  | 896.491002  | 448.749139      | 879.464453     | 440.235865       | 878.480437     | 439.743857       | Q    | 1068.623413 | 534.815345      | 1051.596864    | 526.302070       | 1050.612848    | 525.810062       | 6  |
| 6  | 1009.575066 | 505.291171      | 992.548517     | 496.777897       | 991.564501     | 496.285889       | I    | 629.398087  | 315.202681      | 612.371538     | 306.689407       | 611.387522     | 306.197399       | 5  |
| 7  | 1124.602009 | 562.804643      | 1107.575460    | 554.291368       | 1106.591444    | 553.799360       | D    | 516.314023  | 258.660649      | 499.287474     | 250.147375       | 498.303458     | 249.655367       | 4  |
| 8  | 1237.686073 | 619.346675      | 1220.659524    | 610.833400       | 1219.675508    | 610.341392       | L    | 401.287080  | 201.147178      | 384.260531     | 192.633903       |                |                  | 3  |
| 9  | 1350.770137 | 675.888707      | 1333.743588    | 667.375432       | 1332.759572    | 666.883424       | I    | 288.203016  | 144.605146      | 271.176467     | 136.091871       |                |                  | 2  |
| 10 |             |                 |                |                  |                |                  | R    | 175.118952  | 88.063114       | 158.092403     | 79.549839        |                |                  | 1  |

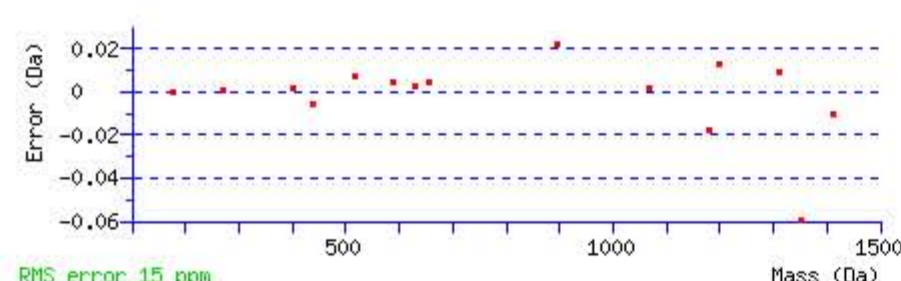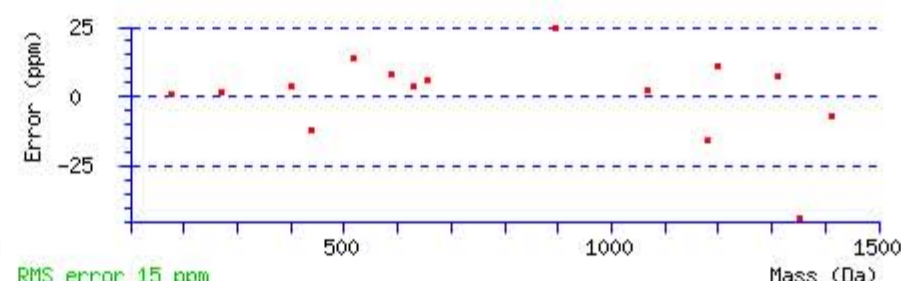

NCBI BLAST search of **LTLEQIDLIR**

(Parameters: blastp, nr protein database, expect=20000, no filter, PAM30)

Other BLAST [web gateways](#)

## All matches to this query

| Score | Mr(calc):   | Delta     | Sequence                       |
|-------|-------------|-----------|--------------------------------|
| 49.1  | 1523.874512 | -0.002844 | <a href="#">LTLEQIDLIR</a>     |
| 12.8  | 1523.867111 | 0.004557  | <a href="#">TLIEAGLPQKVAER</a> |
| 12.3  | 1523.878357 | -0.006689 | <a href="#">TLLADKGEIRVGPR</a> |
| 8.1   | 1523.878357 | -0.006689 | <a href="#">LVDLVNQRDALIR</a>  |
| 1.8   | 1523.849365 | 0.022303  | <a href="#">TLLQQNQQLK</a>     |
| 1.8   | 1523.849365 | 0.022303  | <a href="#">TLLQQNQQLK</a>     |
| 1.0   | 1523.857224 | 0.014444  | <a href="#">TLIRPTYRVSYR</a>   |

Mascot: <http://www.matrixscience.com/>

# MASCOT SEARCH RESULTS

## Peptide View

MS/MS Fragmentation of **ADQVCINLR**

Found in **FBLN3\_HUMAN**, EGF-containing fibulin-like extracellular matrix protein 1 OS=Homo sapiens GN=EFEMP1 PE=1 SV=2

Match to Query 23581: 1398.701568 from(700.358060,2+) rtinseconds(2038) index(32107)

Title: Locus:1.1.1.3373.10 File:"2013-07-02 CLN FXIII 180 min 3rd F 3.wiff"

Data file C:\Program Files (x86)\Matrix Science\Mascot Daemon\mgf9 FXIII 180 min 3rd\mascot\_daemon\_merge.mgf

Click mouse within plot area to zoom in by factor of two about that point

Or, Plot from  to  Da

Label all possible matches  Label matches used for scoring

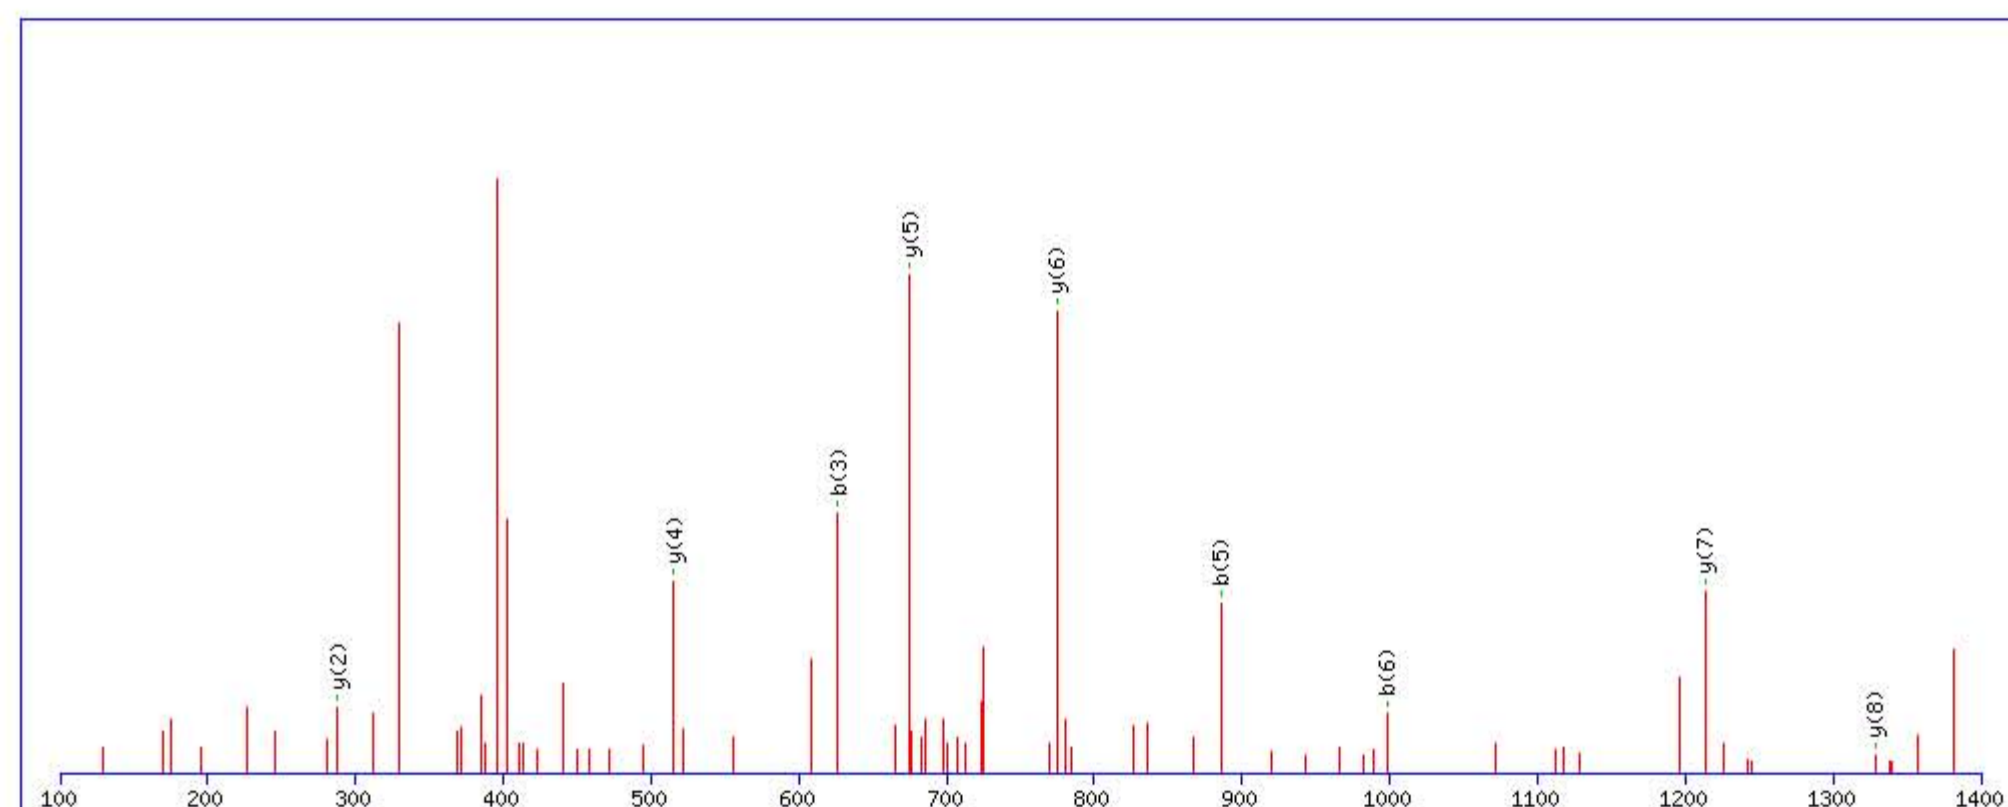

Monoisotopic mass of neutral peptide Mr(calc): 1398.711166

Fixed modifications: Carbamidomethyl (C) (apply to specified residues or termini only)

Variable modifications:

Q3 : Biotin:Thermo-21345 (Q)

Ions Score: 46 Expect: 0.00018

Matches : 9/76 fragment ions using 13 most intense peaks [\(help\)](#)

| # | b                 | b <sup>++</sup> | b <sup>*</sup> | b <sup>*++</sup> | b <sup>0</sup> | b <sup>0++</sup> | Seq. | y                  | y <sup>++</sup> | y <sup>*</sup> | y <sup>*++</sup> | y <sup>0</sup> | y <sup>0++</sup> | # |
|---|-------------------|-----------------|----------------|------------------|----------------|------------------|------|--------------------|-----------------|----------------|------------------|----------------|------------------|---|
| 1 | 72.044390         | 36.525833       |                |                  |                |                  | A    |                    |                 |                |                  |                |                  | 9 |
| 2 | 187.071333        | 94.039304       |                |                  | 169.060768     | 85.034022        | D    | <b>1328.681339</b> | 664.844308      | 1311.654790    | 656.331033       | 1310.670774    | 655.839025       | 8 |
| 3 | <b>626.296659</b> | 313.651968      | 609.270110     | 305.138693       | 608.286094     | 304.646685       | Q    | <b>1213.654396</b> | 607.330836      | 1196.627847    | 598.817562       |                |                  | 7 |
| 4 | 725.365073        | 363.186175      | 708.338524     | 354.672900       | 707.354508     | 354.180892       | V    | <b>774.429070</b>  | 387.718173      | 757.402521     | 379.204898       |                |                  | 6 |
| 5 | <b>885.395722</b> | 443.201499      | 868.369173     | 434.688225       | 867.385157     | 434.196217       | C    | <b>675.360656</b>  | 338.183966      | 658.334107     | 329.670691       |                |                  | 5 |
| 6 | <b>998.479786</b> | 499.743531      | 981.453237     | 491.230257       | 980.469221     | 490.738249       | I    | <b>515.330007</b>  | 258.168641      | 498.303458     | 249.655367       |                |                  | 4 |
| 7 | 1112.522713       | 556.764995      | 1095.496164    | 548.251720       | 1094.512148    | 547.759712       | N    | 402.245943         | 201.626609      | 385.219394     | 193.113335       |                |                  | 3 |
| 8 | 1225.606777       | 613.307027      | 1208.580228    | 604.793752       | 1207.596212    | 604.301744       | L    | <b>288.203016</b>  | 144.605146      | 271.176467     | 136.091871       |                |                  | 2 |
| 9 |                   |                 |                |                  |                |                  | R    | 175.118952         | 88.063114       | 158.092403     | 79.549839        |                |                  | 1 |

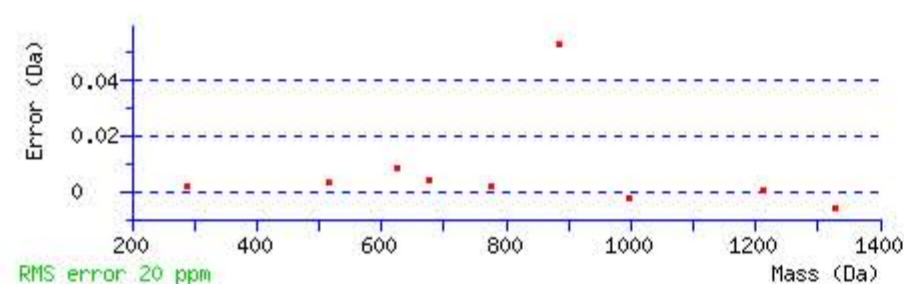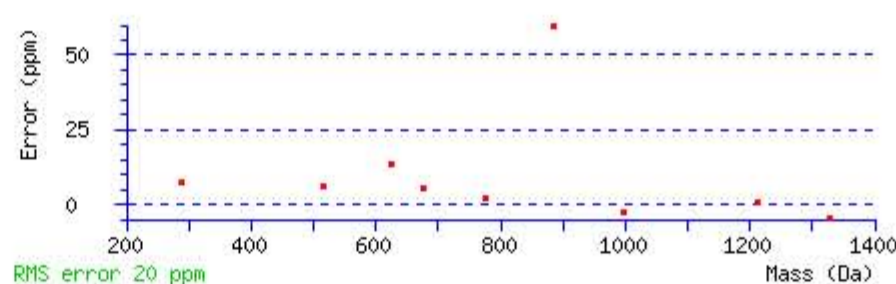

NCBI BLAST search of [ADQVCINLR](#)

(Parameters: blastp, nr protein database, expect=20000, no filter, PAM30)

Other BLAST [web gateways](#)

## All matches to this query

| Score | Mr(calc):   | Delta     | Sequence                         |
|-------|-------------|-----------|----------------------------------|
| 45.8  | 1398.711166 | -0.009598 | <a href="#">ADQVCINLR</a>        |
| 5.5   | 1398.703766 | -0.002198 | <a href="#">GERMADGAPLAGVR</a>   |
| 4.2   | 1398.696396 | 0.005172  | <a href="#">RDGGKVDTSATHR</a>    |
| 3.6   | 1398.721527 | -0.019959 | <a href="#">AATASAGAGGIDGKPR</a> |
| 3.5   | 1398.703766 | -0.002198 | <a href="#">DQAIQSRDR</a>        |
| 1.8   | 1398.689163 | 0.012405  | <a href="#">APSTYTYTSRPR</a>     |
| 0.7   | 1398.703781 | -0.002213 | <a href="#">AVVHMNGKEVSGR</a>    |
| 0.2   | 1398.704422 | -0.002854 | <a href="#">LWATDHYQPLR</a>      |

Mascot: <http://www.matrixscience.com/>

# MASCOT Search Results

## Peptide View

MS/MS Fragmentation of **RGEQCVDIDECTIPPYCHQR**

Found in **FBLN3\_HUMAN**, EGF-containing fibulin-like extracellular matrix protein 1 OS=Homo sapiens GN=EFEMP1 PE=1 SV=2

Match to Query 52112: 2843.260496 from(711.822400,4+) rtinseconds(1794) index(30569)

Title: Locus:1.1.1.3288.13 File:"2013-07-02 CLN FXIII 180 min 3rd F 3.wiff"

Data file C:\Program Files (x86)\Matrix Science\Mascot Daemon\mgf9 FXIII 180 min 3rd\mascot\_daemon\_merge.mgf

Click mouse within plot area to zoom in by factor of two about that point

Or, Plot from  to  Da

Label all possible matches  Label matches used for scoring

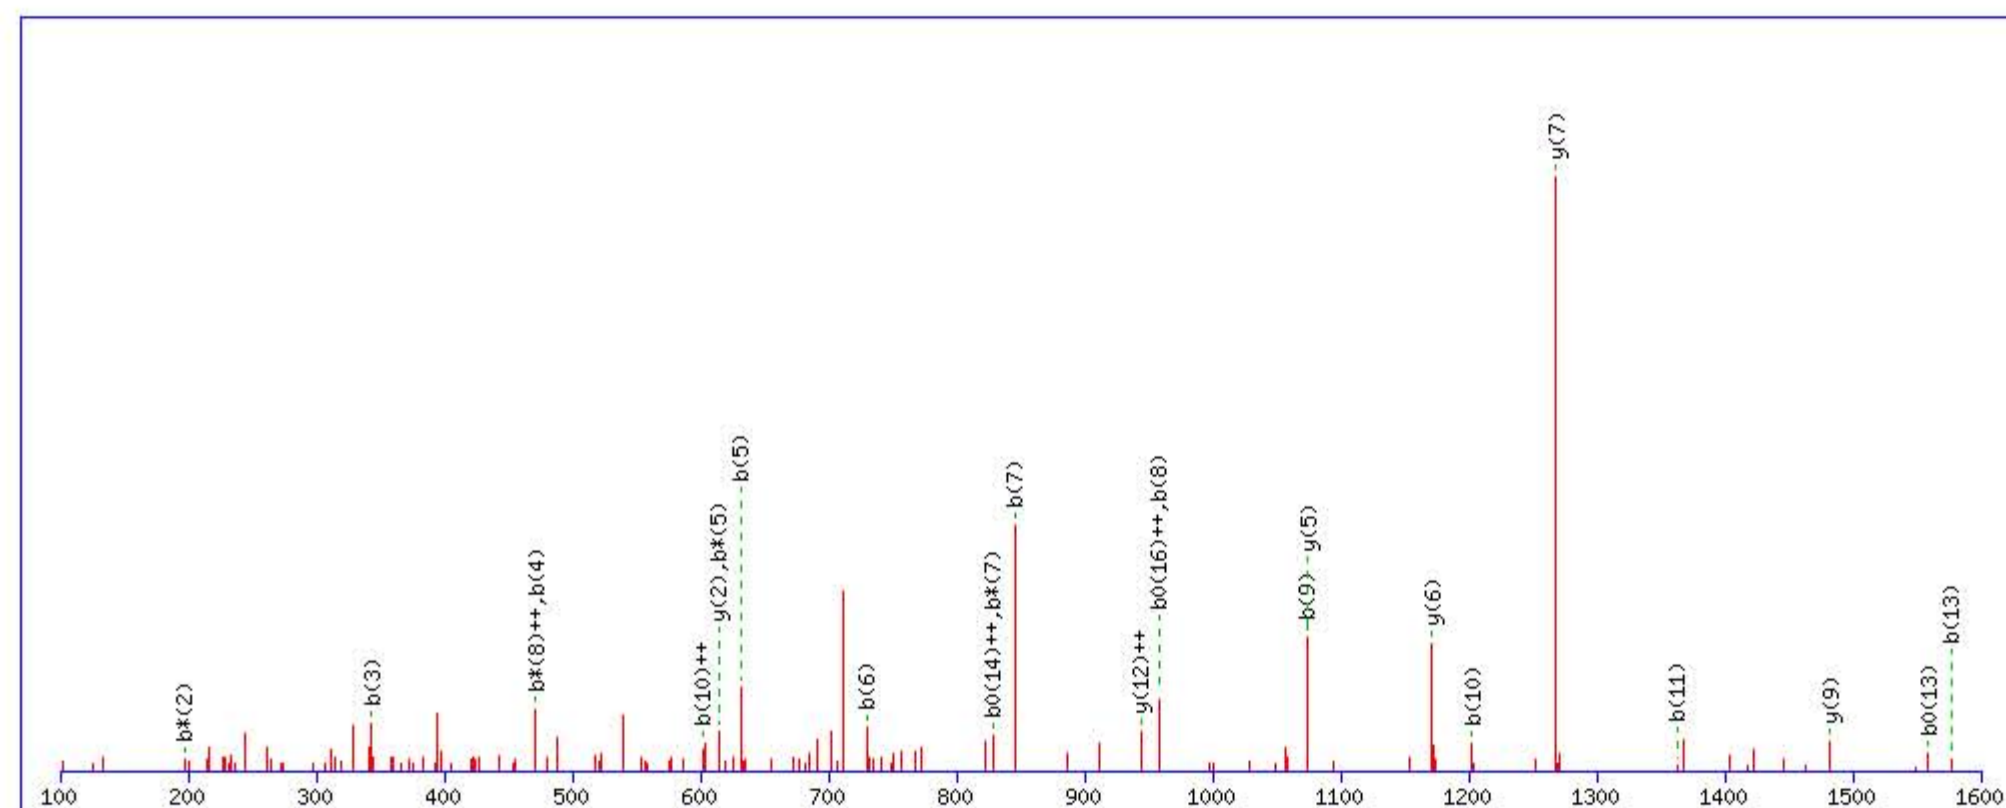

Monoisotopic mass of neutral peptide Mr(calc): 2843.261169

Fixed modifications: Carbamidomethyl (C) (apply to specified residues or termini only)

Variable modifications:

Q19 : Biotin:Thermo-21345 (Q)

Ions Score: 58 Expect: 1e-005

Matches : 24/208 fragment ions using 30 most intense peaks [\(help\)](#)

| #  | b           | b <sup>++</sup> | b <sup>*</sup> | b <sup>*++</sup> | b <sup>0</sup> | b <sup>0++</sup> | Seq. | y           | y <sup>++</sup> | y <sup>*</sup> | y <sup>*++</sup> | y <sup>0</sup> | y <sup>0++</sup> | #  |
|----|-------------|-----------------|----------------|------------------|----------------|------------------|------|-------------|-----------------|----------------|------------------|----------------|------------------|----|
| 1  | 157.108387  | 79.057831       | 140.081838     | 70.544557        |                |                  | R    |             |                 |                |                  |                |                  | 20 |
| 2  | 214.129851  | 107.568564      | 197.103302     | 99.055289        |                |                  | G    | 2688.167329 | 1344.587302     | 2671.140780    | 1336.074028      | 2670.156764    | 1335.582020      | 19 |
| 3  | 343.172444  | 172.089860      | 326.145895     | 163.576585       | 325.161879     | 163.084577       | E    | 2631.145865 | 1316.076570     | 2614.119316    | 1307.563296      | 2613.135300    | 1307.071288      | 18 |
| 4  | 471.231022  | 236.119149      | 454.204473     | 227.605875       | 453.220457     | 227.113867       | Q    | 2502.103272 | 1251.555274     | 2485.076723    | 1243.041999      | 2484.092707    | 1242.549991      | 17 |
| 5  | 631.261671  | 316.134474      | 614.235122     | 307.621199       | 613.251106     | 307.129191       | C    | 2374.044694 | 1187.525985     | 2357.018145    | 1179.012710      | 2356.034129    | 1178.520702      | 16 |
| 6  | 730.330085  | 365.668681      | 713.303536     | 357.155406       | 712.319520     | 356.663398       | V    | 2214.014045 | 1107.510660     | 2196.987496    | 1098.997386      | 2196.003480    | 1098.505378      | 15 |
| 7  | 845.357028  | 423.182152      | 828.330479     | 414.668878       | 827.346463     | 414.176870       | D    | 2114.945631 | 1057.976453     | 2097.919082    | 1049.463179      | 2096.935066    | 1048.971171      | 14 |
| 8  | 958.441092  | 479.724184      | 941.414543     | 471.210910       | 940.430527     | 470.718902       | I    | 1999.918688 | 1000.462982     | 1982.892139    | 991.949708       | 1981.908123    | 991.457700       | 13 |
| 9  | 1073.468035 | 537.237656      | 1056.441486    | 528.724381       | 1055.457470    | 528.232373       | D    | 1886.834624 | 943.920950      | 1869.808075    | 935.407676       | 1868.824059    | 934.915668       | 12 |
| 10 | 1202.510628 | 601.758952      | 1185.484079    | 593.245678       | 1184.500063    | 592.753670       | E    | 1771.807681 | 886.407479      | 1754.781132    | 877.894204       | 1753.797116    | 877.402196       | 11 |
| 11 | 1362.541277 | 681.774277      | 1345.514728    | 673.261002       | 1344.530712    | 672.768994       | C    | 1642.765088 | 821.886182      | 1625.738539    | 813.372908       | 1624.754523    | 812.880900       | 10 |
| 12 | 1463.588956 | 732.298116      | 1446.562407    | 723.784842       | 1445.578391    | 723.292834       | T    | 1482.734439 | 741.870858      | 1465.707890    | 733.357583       | 1464.723874    | 732.865575       | 9  |
| 13 | 1576.673020 | 788.840148      | 1559.646471    | 780.326874       | 1558.662455    | 779.834866       | I    | 1381.686760 | 691.347018      | 1364.660211    | 682.833744       |                |                  | 8  |
| 14 | 1673.725784 | 837.366530      | 1656.699235    | 828.853256       | 1655.715219    | 828.361248       | P    | 1268.602696 | 634.804986      | 1251.576147    | 626.291712       |                |                  | 7  |
| 15 | 1770.778548 | 885.892912      | 1753.751999    | 877.379638       | 1752.767983    | 876.887630       | P    | 1171.549932 | 586.278604      | 1154.523383    | 577.765330       |                |                  | 6  |
| 16 | 1933.841877 | 967.424577      | 1916.815328    | 958.911302       | 1915.831312    | 958.419294       | Y    | 1074.497168 | 537.752222      | 1057.470619    | 529.238948       |                |                  | 5  |
| 17 | 2093.872526 | 1047.439901     | 2076.845977    | 1038.926626      | 2075.861961    | 1038.434618      | C    | 911.433839  | 456.220558      | 894.407290     | 447.707283       |                |                  | 4  |
| 18 | 2230.931438 | 1115.969357     | 2213.904889    | 1107.456082      | 2212.920873    | 1106.964074      | H    | 751.403190  | 376.205233      | 734.376641     | 367.691959       |                |                  | 3  |
| 19 | 2670.156764 | 1335.582020     | 2653.130215    | 1327.068746      | 2652.146199    | 1326.576738      | Q    | 614.344278  | 307.675777      | 597.317729     | 299.162503       |                |                  | 2  |
| 20 |             |                 |                |                  |                |                  | R    | 175.118952  | 88.063114       | 158.092403     | 79.549839        |                |                  | 1  |

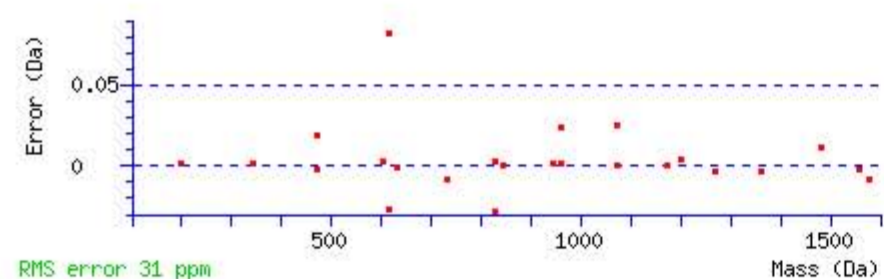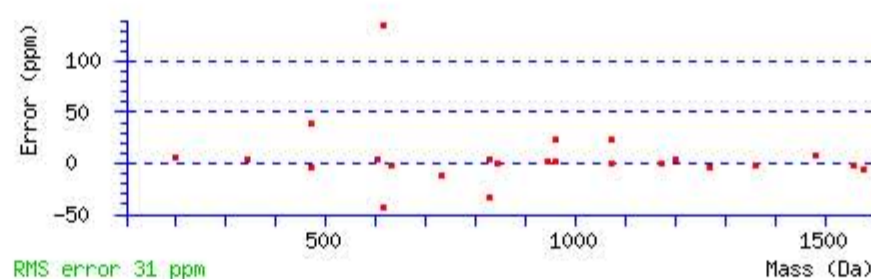

NCBI BLAST search of **RGEQCVDIDECTIPPYCHQR**

(Parameters: blastp, nr protein database, expect=20000, no filter, PAM30)

Other BLAST [web gateways](#)

All matches to this query

| Score | Mr(calc):   | Delta     | Sequence                             |
|-------|-------------|-----------|--------------------------------------|
| 57.7  | 2843.261169 | -0.000673 | <a href="#">RGEQCVDIDECTIPPYCHQR</a> |

Mascot: <http://www.matrixscience.com/>

**MASCOT** Mascot Search Results

Peptide View

MS/MS Fragmentation of **IQCAAGYEQSEHNVCQDIDECTAGTHNCR**  
 Found in **FBLN3\_HUMAN**, EGF-containing fibulin-like extracellular matrix protein 1 OS=Homo sapiens GN=EFEMP1 PE=1 SV=2

Match to Query 61095: 3733.534576 from(934.390920,4+) rtinseconds(1769) index(30392)  
 Title: Locus:1.1.1.3279.23 File:"2013-07-02 CLN FXIII 180 min 3rd F 3.wiff"  
 Data file C:\Program Files (x86)\Matrix Science\Mascot Daemon\mgf9 FXIII 180 min 3rd\mascot\_daemon\_merge.mgf

Click mouse within plot area to zoom in by factor of two about that point  
 Or, Plot from  to  Da   
 Label all possible matches  Label matches used for scoring

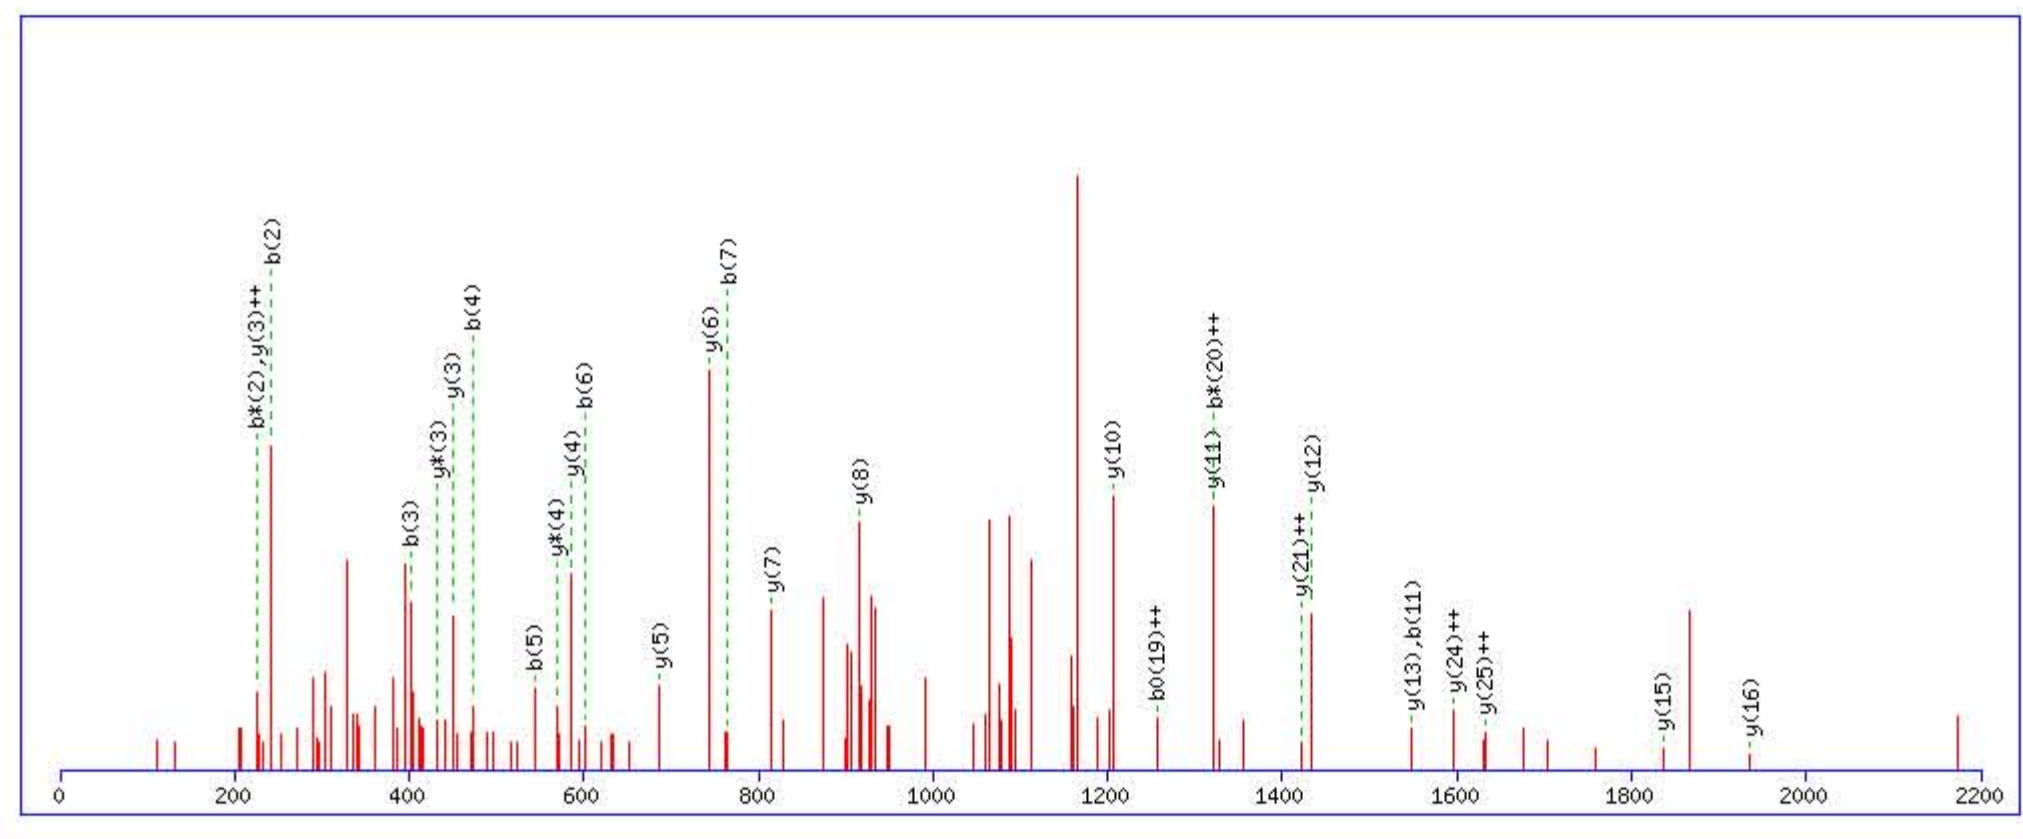

Monoisotopic mass of neutral peptide Mr(calc): 3733.543625  
 Fixed modifications: Carbamidomethyl (C) (apply to specified residues or termini only)  
 Variable modifications:  
 Q9 : Biotin:Thermo-21345 (Q)  
 Ions Score: 48 Expect: 1.7e-005  
 Matches : 28/312 fragment ions using 63 most intense peaks [\(help\)](#)

| #  | b                  | b <sup>++</sup> | b <sup>*</sup>    | b <sup>*++</sup>   | b <sup>0</sup> | b <sup>0++</sup> | Seq. | y                  | y <sup>++</sup>    | y <sup>*</sup>    | y <sup>*++</sup> | y <sup>0</sup> | y <sup>0++</sup> | #  |
|----|--------------------|-----------------|-------------------|--------------------|----------------|------------------|------|--------------------|--------------------|-------------------|------------------|----------------|------------------|----|
| 1  | 114.091340         | 57.549308       |                   |                    |                |                  | I    |                    |                    |                   |                  |                |                  | 29 |
| 2  | <b>242.149918</b>  | 121.578597      | <b>225.123369</b> | 113.065323         |                |                  | Q    | 3621.466836        | 1811.237056        | 3604.440287       | 1802.723781      | 3603.456271    | 1802.231773      | 28 |
| 3  | <b>402.180567</b>  | 201.593922      | 385.154018        | 193.080647         |                |                  | C    | 3493.408258        | 1747.207767        | 3476.381709       | 1738.694492      | 3475.397693    | 1738.202484      | 27 |
| 4  | <b>473.217681</b>  | 237.112479      | 456.191132        | 228.599204         |                |                  | A    | 3333.377609        | 1667.192442        | 3316.351060       | 1658.679168      | 3315.367044    | 1658.187160      | 26 |
| 5  | <b>544.254795</b>  | 272.631036      | 527.228246        | 264.117761         |                |                  | A    | 3262.340495        | <b>1631.673885</b> | 3245.313946       | 1623.160611      | 3244.329930    | 1622.668603      | 25 |
| 6  | <b>601.276259</b>  | 301.141768      | 584.249710        | 292.628493         |                |                  | G    | 3191.303381        | <b>1596.155328</b> | 3174.276832       | 1587.642054      | 3173.292816    | 1587.150046      | 24 |
| 7  | <b>764.339588</b>  | 382.673432      | 747.313039        | 374.160158         |                |                  | Y    | 3134.281917        | 1567.644596        | 3117.255368       | 1559.131322      | 3116.271352    | 1558.639314      | 23 |
| 8  | 893.382181         | 447.194729      | 876.355632        | 438.681454         | 875.371616     | 438.189446       | E    | 2971.218588        | 1486.112932        | 2954.192039       | 1477.599657      | 2953.208023    | 1477.107649      | 22 |
| 9  | 1332.607507        | 666.807391      | 1315.580958       | 658.294117         | 1314.596942    | 657.802109       | Q    | 2842.175995        | <b>1421.591635</b> | 2825.149446       | 1413.078361      | 2824.165430    | 1412.586353      | 21 |
| 10 | 1419.639535        | 710.323406      | 1402.612986       | 701.810131         | 1401.628970    | 701.318123       | S    | 2402.950669        | 1201.978972        | 2385.924120       | 1193.465698      | 2384.940104    | 1192.973690      | 20 |
| 11 | <b>1548.682128</b> | 774.844702      | 1531.655579       | 766.331428         | 1530.671563    | 765.839420       | E    | 2315.918641        | 1158.462958        | 2298.892092       | 1149.949684      | 2297.908076    | 1149.457676      | 19 |
| 12 | 1685.741040        | 843.374158      | 1668.714491       | 834.860884         | 1667.730475    | 834.368876       | H    | 2186.876048        | 1093.941662        | 2169.849499       | 1085.428387      | 2168.865483    | 1084.936379      | 18 |
| 13 | 1799.783967        | 900.395622      | 1782.757418       | 891.882347         | 1781.773402    | 891.390339       | N    | 2049.817136        | 1025.412206        | 2032.790587       | 1016.898931      | 2031.806571    | 1016.406923      | 17 |
| 14 | 1898.852381        | 949.929829      | 1881.825832       | 941.416554         | 1880.841816    | 940.924546       | V    | <b>1935.774209</b> | 968.390742         | 1918.747660       | 959.877468       | 1917.763644    | 959.385460       | 16 |
| 15 | 2058.883030        | 1029.945153     | 2041.856481       | 1021.431879        | 2040.872465    | 1020.939871      | C    | <b>1836.705795</b> | 918.856535         | 1819.679246       | 910.343261       | 1818.695230    | 909.851253       | 15 |
| 16 | 2186.941608        | 1093.974442     | 2169.915059       | 1085.461167        | 2168.931043    | 1084.969159      | Q    | 1676.675146        | 838.841211         | 1659.648597       | 830.327936       | 1658.664581    | 829.835928       | 14 |
| 17 | 2301.968551        | 1151.487913     | 2284.942002       | 1142.974639        | 2283.957986    | 1142.482631      | D    | <b>1548.616568</b> | 774.811922         | 1531.590019       | 766.298647       | 1530.606003    | 765.806639       | 13 |
| 18 | 2415.052615        | 1208.029945     | 2398.026066       | 1199.516671        | 2397.042050    | 1199.024663      | I    | <b>1433.589625</b> | 717.298450         | 1416.563076       | 708.785176       | 1415.579060    | 708.293168       | 12 |
| 19 | 2530.079558        | 1265.543417     | 2513.053009       | 1257.030142        | 2512.068993    | 1256.538134      | D    | <b>1320.505561</b> | 660.756418         | 1303.479012       | 652.243144       | 1302.494996    | 651.751136       | 11 |
| 20 | 2659.122151        | 1330.064713     | 2642.095602       | <b>1321.551439</b> | 2641.111586    | 1321.059431      | E    | <b>1205.478618</b> | 603.242947         | 1188.452069       | 594.729672       | 1187.468053    | 594.237664       | 10 |
| 21 | 2819.152800        | 1410.080038     | 2802.126251       | 1401.566763        | 2801.142235    | 1401.074755      | C    | 1076.436025        | 538.721650         | 1059.409476       | 530.208376       | 1058.425460    | 529.716368       | 9  |
| 22 | 2920.200479        | 1460.603877     | 2903.173930       | 1452.090603        | 2902.189914    | 1451.598595      | T    | <b>916.405376</b>  | 458.706326         | 899.378827        | 450.193051       | 898.394811     | 449.701043       | 8  |
| 23 | 2991.237593        | 1496.122434     | 2974.211044       | 1487.609160        | 2973.227028    | 1487.117152      | A    | <b>815.357697</b>  | 408.182486         | 798.331148        | 399.669212       | 797.347132     | 399.177204       | 7  |
| 24 | 3048.259057        | 1524.633166     | 3031.232508       | 1516.119892        | 3030.248492    | 1515.627884      | G    | <b>744.320583</b>  | 372.663929         | 727.294034        | 364.150655       | 726.310018     | 363.658647       | 6  |
| 25 | 3149.306736        | 1575.157006     | 3132.280187       | 1566.643731        | 3131.296171    | 1566.151723      | T    | <b>687.299119</b>  | 344.153197         | 670.272570        | 335.639923       | 669.288554     | 335.147915       | 5  |
| 26 | 3286.365648        | 1643.686462     | 3269.339099       | 1635.173187        | 3268.355083    | 1634.681179      | H    | <b>586.251440</b>  | 293.629358         | <b>569.224891</b> | 285.116083       |                |                  | 4  |
| 27 | 3400.408575        | 1700.707925     | 3383.382026       | 1692.194651        | 3382.398010    | 1691.702643      | N    | <b>449.192528</b>  | <b>225.099902</b>  | <b>432.165979</b> | 216.586627       |                |                  | 3  |
| 28 | 3560.439224        | 1780.723250     | 3543.412675       | 1772.209975        | 3542.428659    | 1771.717967      | C    | 335.149601         | 168.078438         | 318.123052        | 159.565164       |                |                  | 2  |
| 29 |                    |                 |                   |                    |                |                  | R    | 175.118952         | 88.063114          | 158.092403        | 79.549839        |                |                  | 1  |

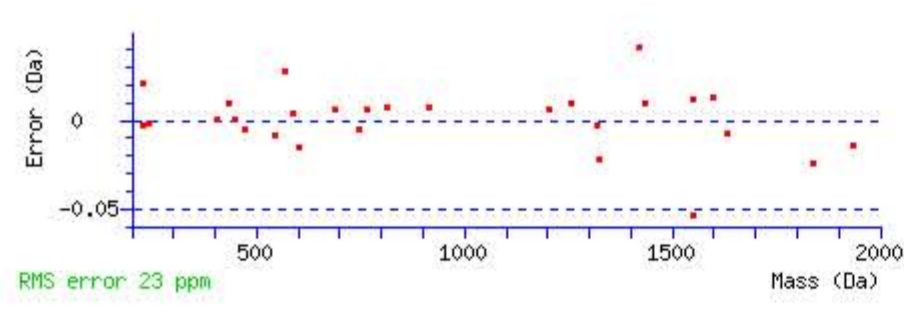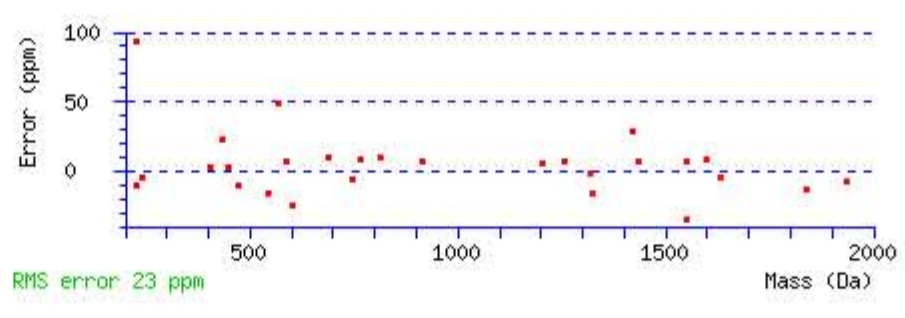

NCBI BLAST search of **IQCAAGYEQSEHNVCQDIDECTAGTHNCR**  
 (Parameters: blastp, nr protein database, expect=20000, no filter, PAM30)  
 Other BLAST [web gateways](#)

All matches to this query

| Score | Mr(calc):   | Delta     | Sequence                                      |
|-------|-------------|-----------|-----------------------------------------------|
| 47.6  | 3733.543625 | -0.009049 | <a href="#">IQCAAGYEQSEHNVCQDIDECTAGTHNCR</a> |
| 33.5  | 3733.543625 | -0.009049 | <a href="#">IQCAAGYEQSEHNVCQDIDECTAGTHNCR</a> |
| 27.0  | 3733.543625 | -0.009049 | <a href="#">IQCAAGYEQSEHNVCQDIDECTAGTHNCR</a> |

# MASCOT Search Results

## Peptide View

MS/MS Fragmentation of **LLPAQLPAEK**

Found in **ECM1\_HUMAN**, Extracellular matrix protein 1 OS=Homo sapiens GN=ECM1 PE=1 SV=2

Match to Query 23261: 1389.811308 from(695.912930,2+) rtinseconds(2065) index(5290)

Title: Locus:1.1.1.3239.8 File:"2013-07-02 CLN FXIII 180 min 3rd F 1.wiff"

Data file C:\Program Files (x86)\Matrix Science\Mascot Daemon\mgf\9 FXIII 180 min 3rd\mascot\_daemon\_merge.mgf

Click mouse within plot area to zoom in by factor of two about that point

Or, Plot from  to  Da

Label all possible matches  Label matches used for scoring

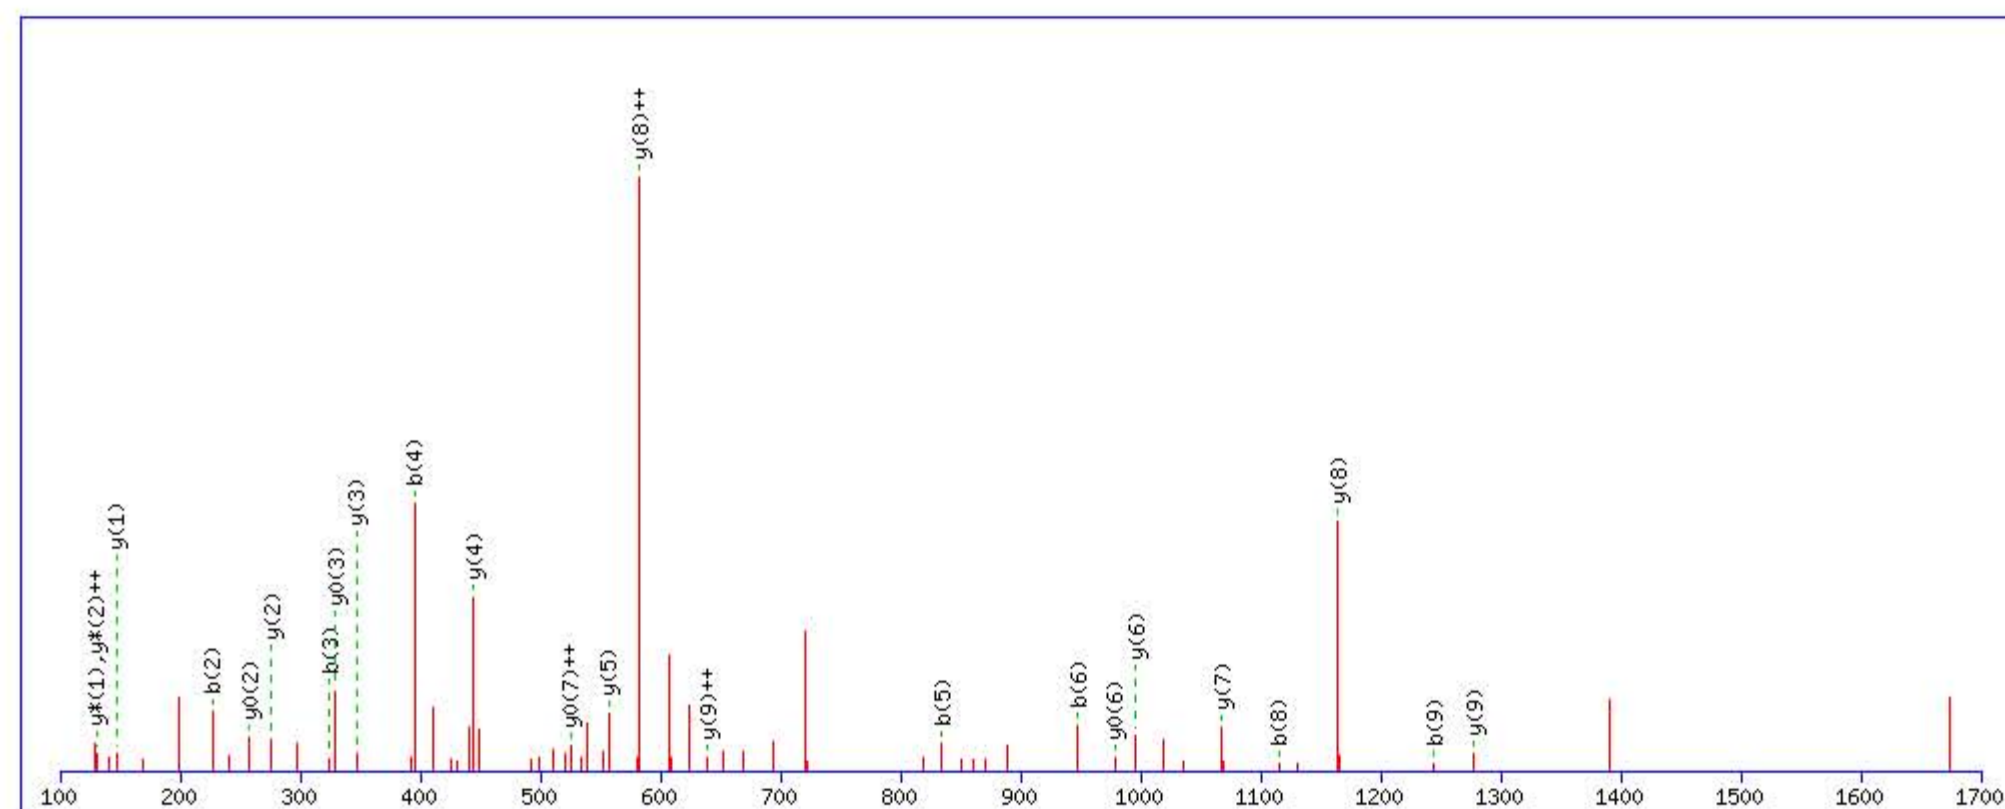

Monoisotopic mass of neutral peptide Mr(calc): 1389.805359

Fixed modifications: Carbamidomethyl (C) (apply to specified residues or termini only)

Variable modifications:

Q5 : Biotin:Thermo-21345 (Q)

Ions Score: 50 Expect: 6e-005

Matches : 24/82 fragment ions using 49 most intense peaks [\(help\)](#)

| #  | b                  | b <sup>++</sup> | b <sup>*</sup> | b <sup>*++</sup> | b <sup>0</sup> | b <sup>0++</sup> | Seq. | y                  | y <sup>++</sup>   | y <sup>*</sup>    | y <sup>*++</sup>  | y <sup>0</sup>    | y <sup>0++</sup>  | #  |
|----|--------------------|-----------------|----------------|------------------|----------------|------------------|------|--------------------|-------------------|-------------------|-------------------|-------------------|-------------------|----|
| 1  | 114.091340         | 57.549308       |                |                  |                |                  | L    |                    |                   |                   |                   |                   |                   | 10 |
| 2  | <b>227.175404</b>  | 114.091340      |                |                  |                |                  | L    | <b>1277.728607</b> | <b>639.367942</b> | 1260.702058       | 630.854667        | 1259.718042       | 630.362659        | 9  |
| 3  | <b>324.228168</b>  | 162.617722      |                |                  |                |                  | P    | <b>1164.644543</b> | <b>582.825909</b> | 1147.617994       | 574.312635        | 1146.633978       | 573.820627        | 8  |
| 4  | <b>395.265282</b>  | 198.136279      |                |                  |                |                  | A    | <b>1067.591779</b> | 534.299527        | 1050.565230       | 525.786253        | 1049.581214       | <b>525.294245</b> | 7  |
| 5  | <b>834.490608</b>  | 417.748942      | 817.464059     | 409.235668       |                |                  | Q    | <b>996.554665</b>  | 498.780970        | 979.528116        | 490.267696        | <b>978.544100</b> | 489.775688        | 6  |
| 6  | <b>947.574672</b>  | 474.290974      | 930.548123     | 465.777700       |                |                  | L    | <b>557.329339</b>  | 279.168307        | 540.302790        | 270.655033        | 539.318774        | 270.163025        | 5  |
| 7  | 1044.627436        | 522.817356      | 1027.600887    | 514.304082       |                |                  | P    | <b>444.245275</b>  | 222.626275        | 427.218726        | 214.113001        | 426.234710        | 213.620993        | 4  |
| 8  | <b>1115.664550</b> | 558.335913      | 1098.638001    | 549.822639       |                |                  | A    | <b>347.192511</b>  | 174.099893        | 330.165962        | 165.586619        | <b>329.181946</b> | 165.094611        | 3  |
| 9  | <b>1244.707143</b> | 622.857209      | 1227.680594    | 614.343935       | 1226.696578    | 613.851927       | E    | <b>276.155397</b>  | 138.581336        | 259.128848        | <b>130.068062</b> | <b>258.144832</b> | 129.576054        | 2  |
| 10 |                    |                 |                |                  |                |                  | K    | <b>147.112804</b>  | 74.060040         | <b>130.086255</b> | 65.546765         |                   |                   | 1  |

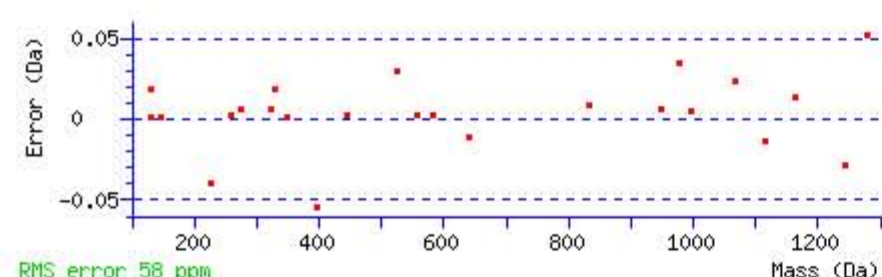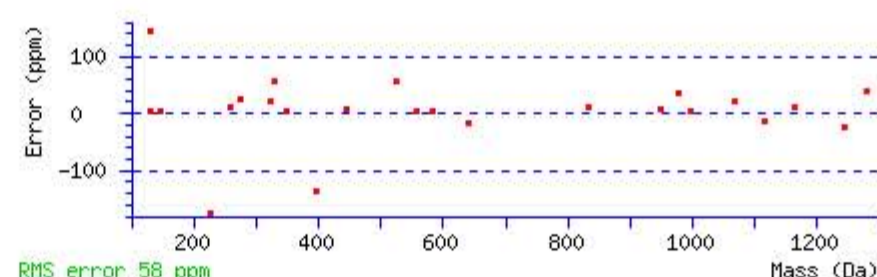

NCBI BLAST search of [LLPAQLPAEK](#)

(Parameters: blastp, nr protein database, expect=20000, no filter, PAM30)

Other BLAST [web gateways](#)

## All matches to this query

| Score | Mr(calc):   | Delta     | Sequence                     |
|-------|-------------|-----------|------------------------------|
| 50.5  | 1389.805359 | 0.005949  | <a href="#">LLPAQLPAEK</a>   |
| 9.6   | 1389.809189 | 0.002119  | <a href="#">LIKRLDLSYNR</a>  |
| 3.2   | 1389.809204 | 0.002104  | <a href="#">IARVPRLPPDEK</a> |
| 1.1   | 1389.813232 | -0.001924 | <a href="#">LIQAPSKFAFLR</a> |
| 1.0   | 1389.797989 | 0.013319  | <a href="#">LLNLQSLFVTSR</a> |
| 0.9   | 1389.823135 | -0.011827 | <a href="#">ILIVITDGQKYK</a> |
| 0.6   | 1389.816605 | -0.005297 | <a href="#">ILGPLPKHMIQK</a> |
| 0.4   | 1389.805359 | 0.005949  | <a href="#">LLSSYLQKK</a>    |

# MASCOT SEARCH RESULTS

## Peptide View

MS/MS Fragmentation of **NLPATDPLQR**

Found in **ECM1\_HUMAN**, Extracellular matrix protein 1 OS=Homo sapiens GN=ECM1 PE=1 SV=2

Match to Query 25500: 1434.761708 from(718.388130,2+) rtinseconds(1997) index(19068)

Title: Locus:1.1.1.3261.4 File:"2013-07-02 CLN FXIII 180 min 3rd F 2.wiff"

Data file C:\Program Files (x86)\Matrix Science\Mascot Daemon\mgf\9 FXIII 180 min 3rd\mascot\_daemon\_merge.mgf

Click mouse within plot area to zoom in by factor of two about that point

Or, Plot from  to  Da

Label all possible matches  Label matches used for scoring

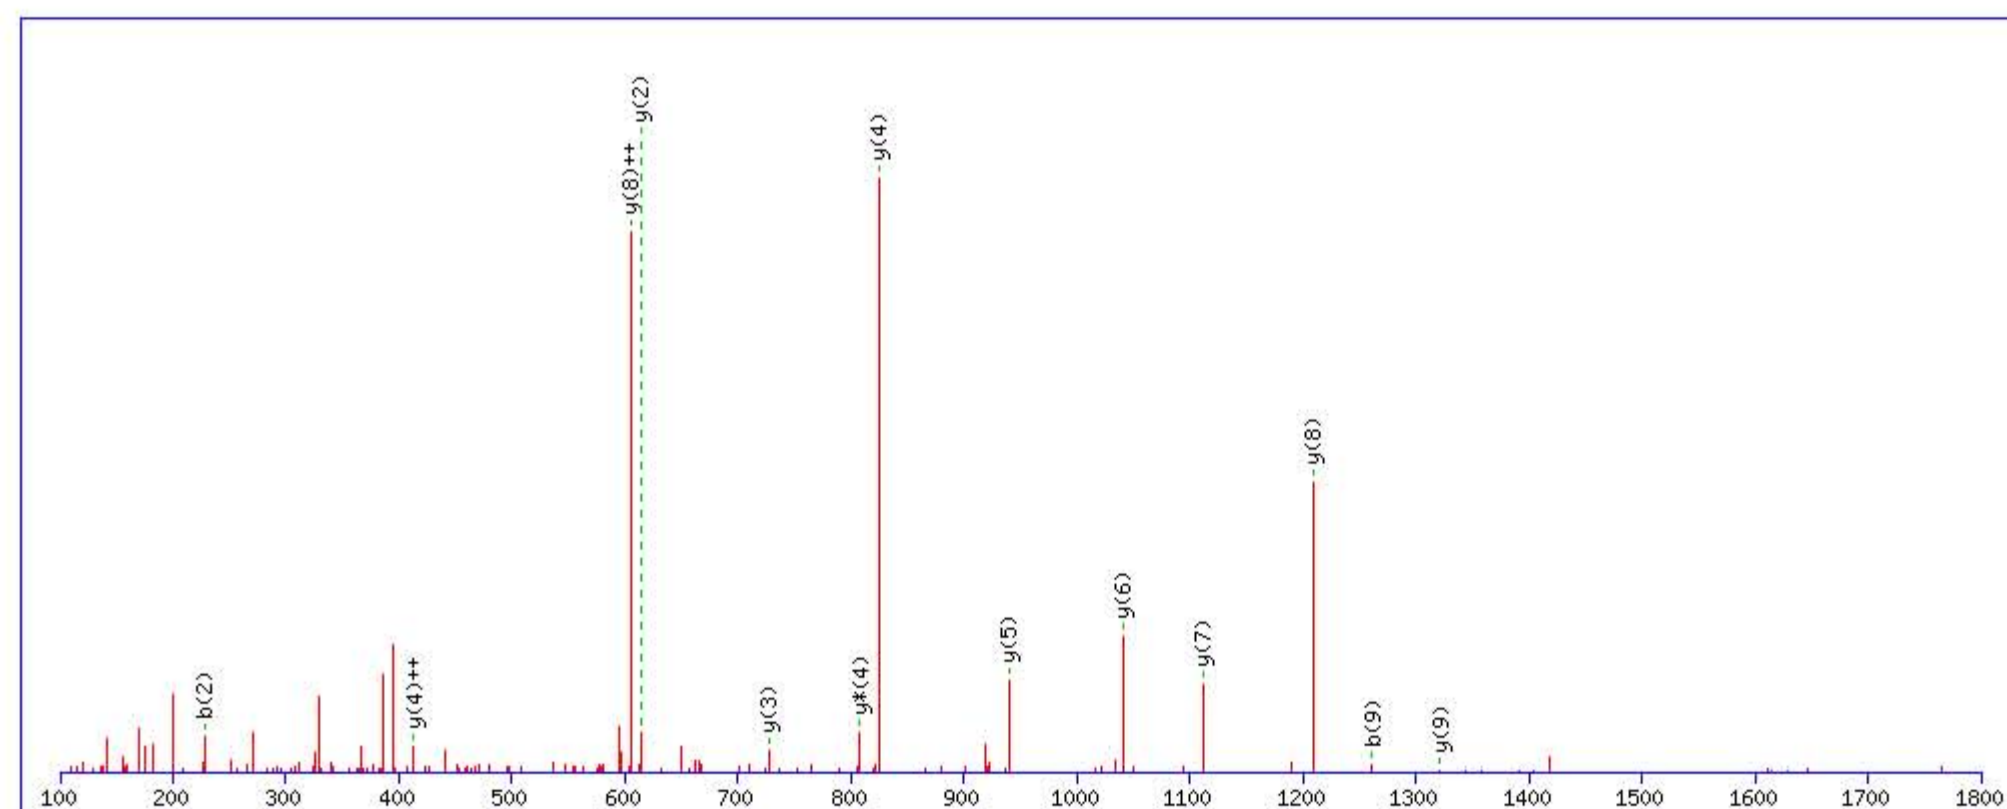

Monoisotopic mass of neutral peptide Mr(calc): 1434.765305

Fixed modifications: Carbamidomethyl (C) (apply to specified residues or termini only)

Variable modifications:

Q9 : Biotin:Thermo-21345 (Q)

Ions Score: 52 Expect: 7.5e-005

Matches : 13/92 fragment ions using 26 most intense peaks [\(help\)](#)

| #  | b                  | b <sup>++</sup> | b <sup>*</sup> | b <sup>*++</sup> | b <sup>0</sup> | b <sup>0++</sup> | Seq. | y                  | y <sup>++</sup>   | y <sup>*</sup>    | y <sup>*++</sup> | y <sup>0</sup> | y <sup>0++</sup> | #  |
|----|--------------------|-----------------|----------------|------------------|----------------|------------------|------|--------------------|-------------------|-------------------|------------------|----------------|------------------|----|
| 1  | 115.050203         | 58.028740       | 98.023654      | 49.515465        |                |                  | N    |                    |                   |                   |                  |                |                  | 10 |
| 2  | <b>228.134267</b>  | 114.570771      | 211.107718     | 106.057497       |                |                  | L    | <b>1321.729670</b> | 661.368473        | 1304.703121       | 652.855199       | 1303.719105    | 652.363190       | 9  |
| 3  | 325.187031         | 163.097153      | 308.160482     | 154.583879       |                |                  | P    | <b>1208.645606</b> | <b>604.826441</b> | 1191.619057       | 596.313166       | 1190.635041    | 595.821158       | 8  |
| 4  | 396.224145         | 198.615710      | 379.197596     | 190.102436       |                |                  | A    | <b>1111.592842</b> | 556.300059        | 1094.566293       | 547.786784       | 1093.582277    | 547.294776       | 7  |
| 5  | 497.271824         | 249.139550      | 480.245275     | 240.626275       | 479.261259     | 240.134267       | T    | <b>1040.555728</b> | 520.781502        | 1023.529179       | 512.268227       | 1022.545163    | 511.776220       | 6  |
| 6  | 612.298767         | 306.653022      | 595.272218     | 298.139747       | 594.288202     | 297.647739       | D    | <b>939.508049</b>  | 470.257662        | 922.481500        | 461.744388       | 921.497484     | 461.252380       | 5  |
| 7  | 709.351531         | 355.179404      | 692.324982     | 346.666129       | 691.340966     | 346.174121       | P    | <b>824.481106</b>  | <b>412.744191</b> | <b>807.454557</b> | 404.230916       |                |                  | 4  |
| 8  | 822.435595         | 411.721436      | 805.409046     | 403.208161       | 804.425030     | 402.716153       | L    | <b>727.428342</b>  | 364.217809        | 710.401793        | 355.704534       |                |                  | 3  |
| 9  | <b>1261.660921</b> | 631.334098      | 1244.634372    | 622.820824       | 1243.650356    | 622.328816       | Q    | <b>614.344278</b>  | 307.675777        | 597.317729        | 299.162502       |                |                  | 2  |
| 10 |                    |                 |                |                  |                |                  | R    | 175.118952         | 88.063114         | 158.092403        | 79.549839        |                |                  | 1  |

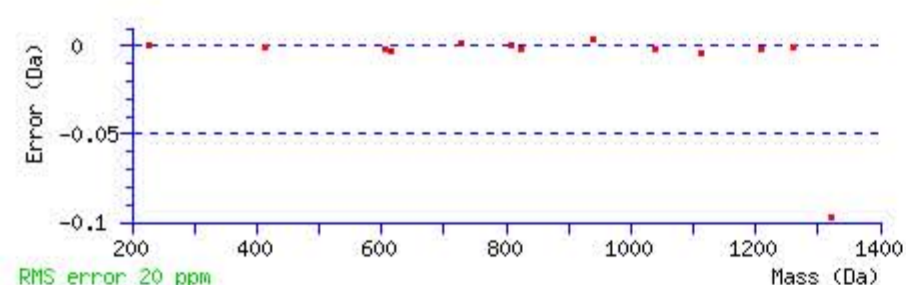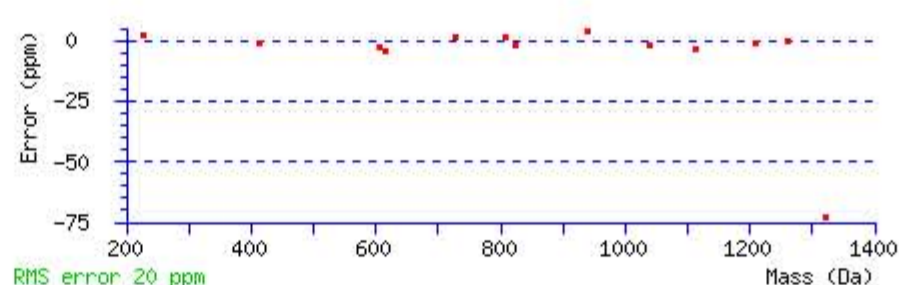

NCBI BLAST search of [NLPATDPLQR](#)

(Parameters: blastp, nr protein database, expect=20000, no filter, PAM30)

Other BLAST [web gateways](#)

All matches to this query

| Score | Mr(calc):   | Delta     | Sequence                      |
|-------|-------------|-----------|-------------------------------|
| 52.4  | 1434.765305 | -0.003597 | <a href="#">NLPATDPLQR</a>    |
| 7.9   | 1434.757889 | 0.003819  | <a href="#">NLIRQISSGEYR</a>  |
| 3.4   | 1434.783066 | -0.021358 | <a href="#">VKDQKLFVSESR</a>  |
| 0.7   | 1434.761932 | -0.000224 | <a href="#">NIFPSNLVSAAFR</a> |

Mascot: <http://www.matrixscience.com/>

# MASCOT Search Results

## Peptide View

MS/MS Fragmentation of **ELLALIQLER**

Found in **ECM1\_HUMAN**, Extracellular matrix protein 1 OS=Homo sapiens GN=ECM1 PE=1 SV=2

Match to Query 27421: 1507.887508 from(754.951030,2+) rtinseconds(2769) index(23558)

Title: Locus:1.1.1.3528.15 File:"2013-07-02 CLN FXIII 180 min 3rd F 2.wiff"

Data file C:\Program Files (x86)\Matrix Science\Mascot Daemon\mgf\9 FXIII 180 min 3rd\mascot\_daemon\_merge.mgf

Click mouse within plot area to zoom in by factor of two about that point

Or, Plot from  to  Da

Label all possible matches  Label matches used for scoring

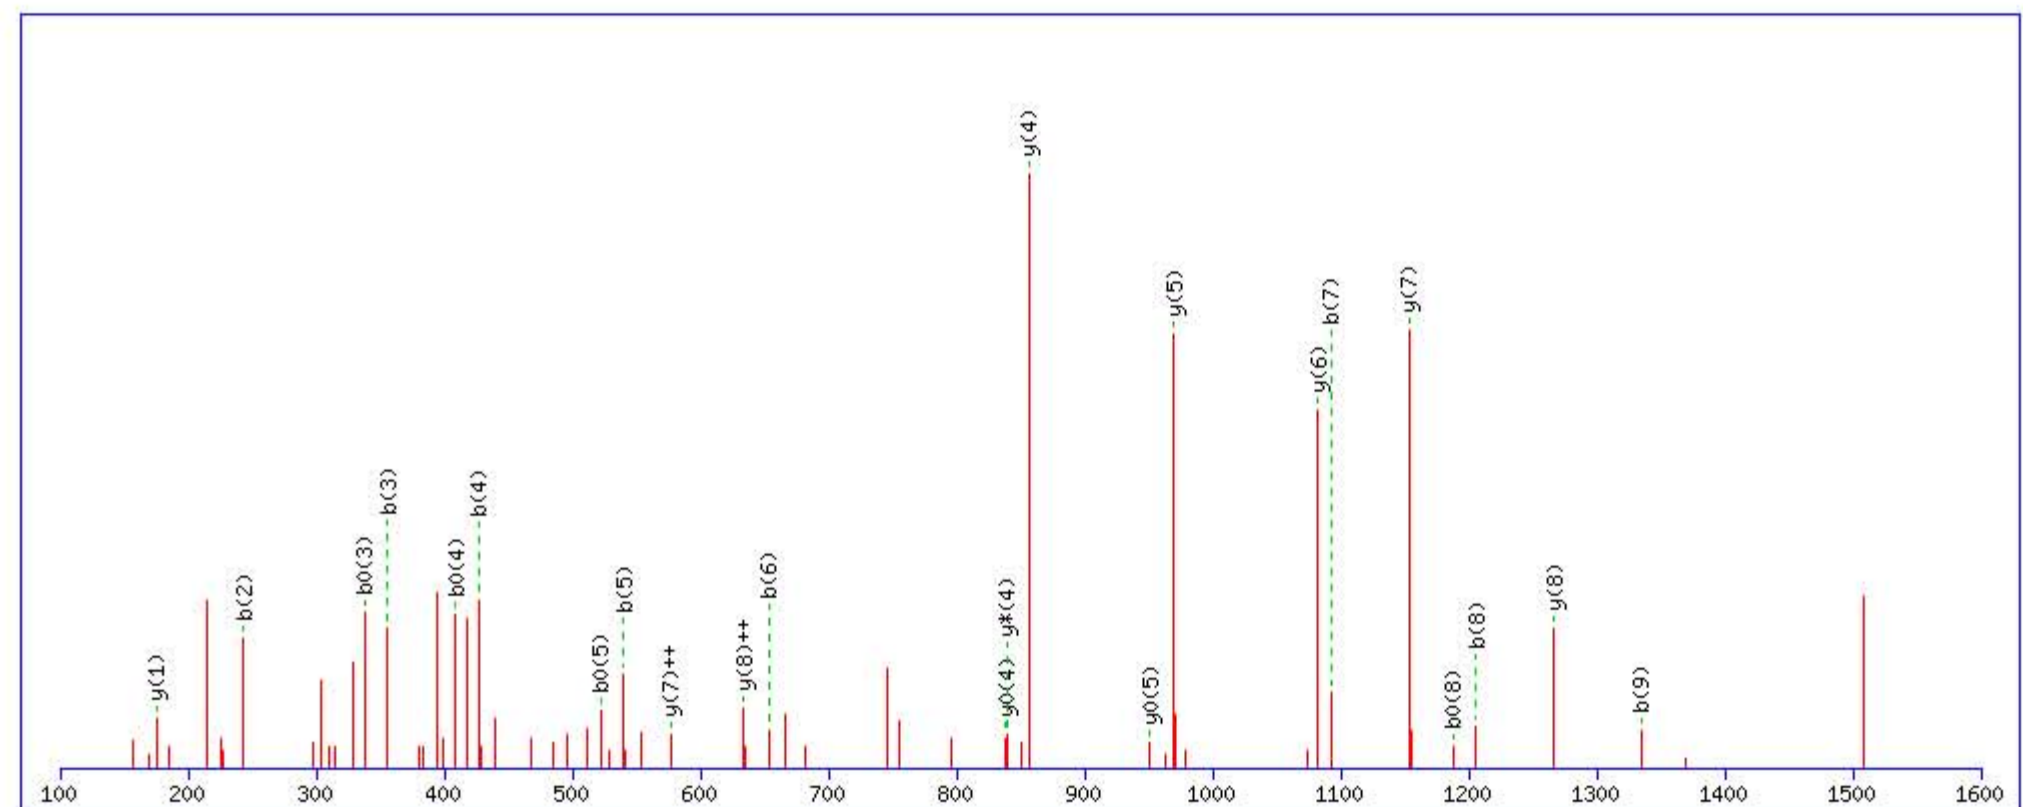

Monoisotopic mass of neutral peptide Mr(calc): 1507.879578

Fixed modifications: Carbamidomethyl (C) (apply to specified residues or termini only)

Variable modifications:

Q7 : Biotin:Thermo-21345 (Q)

Ions Score: 56 Expect: 1.7e-005

Matches : 23/94 fragment ions using 35 most intense peaks [\(help\)](#)

| #  | b                  | b <sup>++</sup> | b <sup>*</sup> | b <sup>+++</sup> | b <sup>0</sup>     | b <sup>0++</sup> | Seq. | y                  | y <sup>++</sup>   | y <sup>*</sup>    | y <sup>+++</sup> | y <sup>0</sup>    | y <sup>0++</sup> | #  |
|----|--------------------|-----------------|----------------|------------------|--------------------|------------------|------|--------------------|-------------------|-------------------|------------------|-------------------|------------------|----|
| 1  | 130.049869         | 65.528572       |                |                  | 112.039304         | 56.523290        | E    |                    |                   |                   |                  |                   |                  | 10 |
| 2  | <b>243.133933</b>  | 122.070605      |                |                  | 225.123368         | 113.065322       | L    | 1379.844305        | 690.425790        | 1362.817756       | 681.912516       | 1361.833740       | 681.420508       | 9  |
| 3  | <b>356.217997</b>  | 178.612637      |                |                  | <b>338.207432</b>  | 169.607354       | L    | <b>1266.760241</b> | <b>633.883759</b> | 1249.733692       | 625.370484       | 1248.749676       | 624.878476       | 8  |
| 4  | <b>427.255111</b>  | 214.131193      |                |                  | <b>409.244546</b>  | 205.125911       | A    | <b>1153.676177</b> | <b>577.341727</b> | 1136.649628       | 568.828452       | 1135.665612       | 568.336444       | 7  |
| 5  | <b>540.339175</b>  | 270.673226      |                |                  | <b>522.328610</b>  | 261.667943       | L    | <b>1082.639063</b> | 541.823169        | 1065.612514       | 533.309895       | 1064.628498       | 532.817887       | 6  |
| 6  | <b>653.423239</b>  | 327.215258      |                |                  | 635.412674         | 318.209975       | I    | <b>969.554999</b>  | 485.281138        | 952.528450        | 476.767863       | <b>951.544434</b> | 476.275855       | 5  |
| 7  | <b>1092.648565</b> | 546.827921      | 1075.622016    | 538.314646       | 1074.638000        | 537.822638       | Q    | <b>856.470935</b>  | 428.739105        | <b>839.444386</b> | 420.225831       | <b>838.460370</b> | 419.733823       | 4  |
| 8  | <b>1205.732629</b> | 603.369953      | 1188.706080    | 594.856678       | <b>1187.722064</b> | 594.364670       | L    | 417.245609         | 209.126442        | 400.219060        | 200.613168       | 399.235044        | 200.121160       | 3  |
| 9  | <b>1334.775222</b> | 667.891249      | 1317.748673    | 659.377975       | 1316.764657        | 658.885966       | E    | 304.161545         | 152.584410        | 287.134996        | 144.071136       | 286.150980        | 143.579128       | 2  |
| 10 |                    |                 |                |                  |                    |                  | R    | <b>175.118952</b>  | 88.063114         | 158.092403        | 79.549839        |                   |                  | 1  |

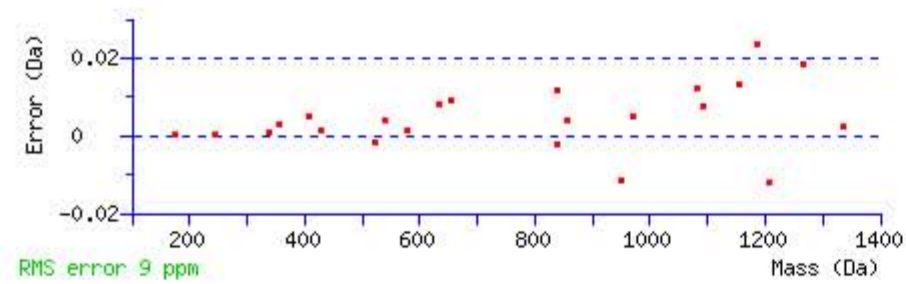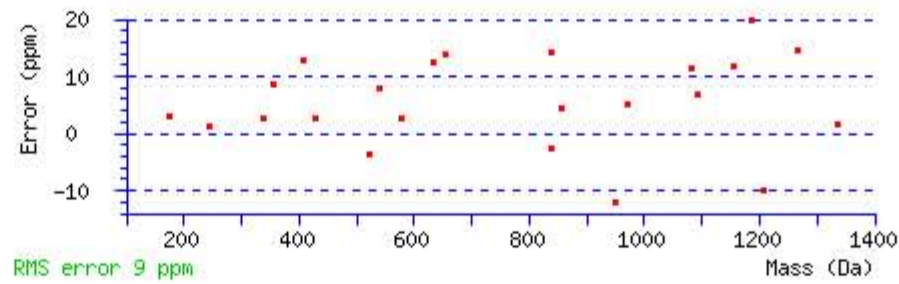

NCBI BLAST search of [ELLALIQLER](#)

(Parameters: blastp, nr protein database, expect=20000, no filter, PAM30)

Other BLAST [web gateways](#)

All matches to this query

| Score | Mr(calc):   | Delta    | Sequence                   |
|-------|-------------|----------|----------------------------|
| 56.2  | 1507.879578 | 0.007930 | <a href="#">ELLALIQLER</a> |



# MASCOT SCIENCE Mascot Search Results

## Peptide View

MS/MS Fragmentation of **ELPSLQHPNEQK**

Found in **ECM1\_HUMAN**, Extracellular matrix protein 1 OS=Homo sapiens GN=ECM1 PE=1 SV=2

Match to Query 34222: 1729.884012 from(577.635280,3+) rtinseconds(1690) index(3180)

Title: Locus:1.1.1.3108.8 File:"2013-07-02 CLN FXIII 180 min 3rd F 1.wiff"

Data file C:\Program Files (x86)\Matrix Science\Mascot Daemon\mgf9 FXIII 180 min 3rd\mascot\_daemon\_merge.mgf

Click mouse within plot area to zoom in by factor of two about that point

Or, Plot from  to  Da

Label all possible matches  Label matches used for scoring

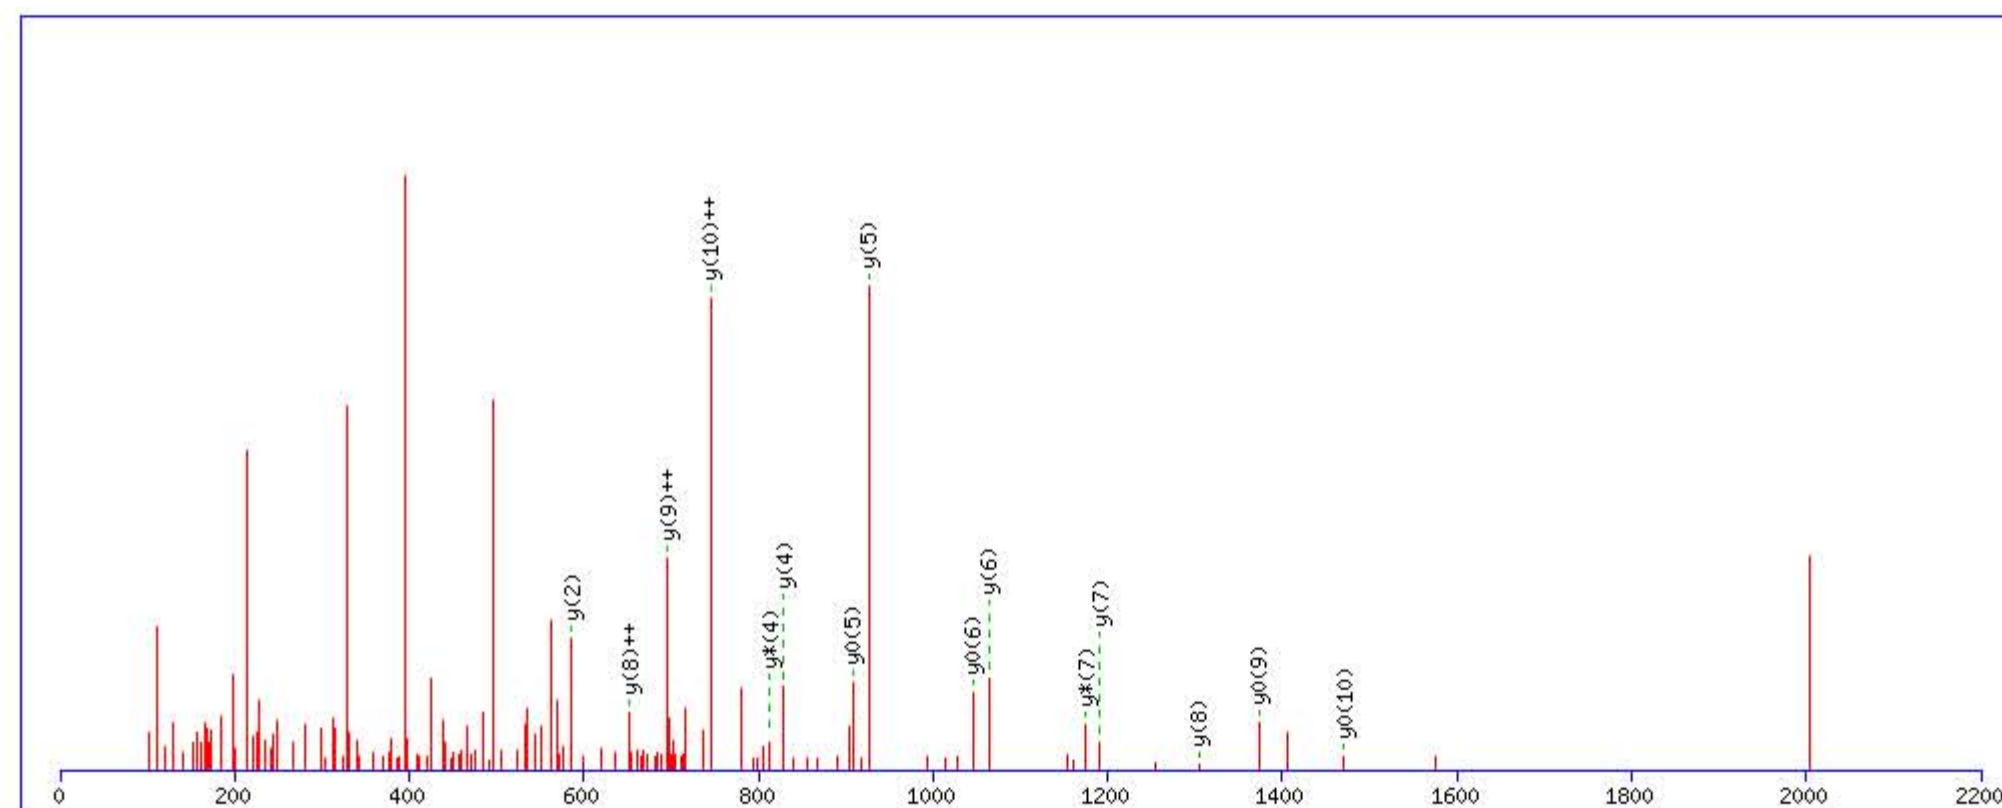

Monoisotopic mass of neutral peptide Mr(calc): 1729.882111

Fixed modifications: Carbamidomethyl (C) (apply to specified residues or termini only)

Variable modifications:

Q11 : Biotin:Thermo-21345 (Q)

Ions Score: 26 Expect: 0.063

Matches : 15/118 fragment ions using 28 most intense peaks [\(help\)](#)

| #  | b           | b <sup>++</sup> | b <sup>+</sup> | b <sup>*++</sup> | b <sup>0</sup> | b <sup>0++</sup> | Seq. | y           | y <sup>++</sup> | y <sup>+</sup> | y <sup>*++</sup> | y <sup>0</sup> | y <sup>0++</sup> | #  |
|----|-------------|-----------------|----------------|------------------|----------------|------------------|------|-------------|-----------------|----------------|------------------|----------------|------------------|----|
| 1  | 130.049869  | 65.528572       |                |                  | 112.039304     | 56.523290        | E    |             |                 |                |                  |                |                  | 12 |
| 2  | 243.133933  | 122.070605      |                |                  | 225.123368     | 113.065322       | L    | 1601.846824 | 801.427050      | 1584.820275    | 792.913776       | 1583.836259    | 792.421767       | 11 |
| 3  | 340.186697  | 170.596987      |                |                  | 322.176132     | 161.591704       | P    | 1488.762760 | 744.885018      | 1471.736211    | 736.371744       | 1470.752195    | 735.879736       | 10 |
| 4  | 427.218725  | 214.113001      |                |                  | 409.208160     | 205.107718       | S    | 1391.709996 | 696.358636      | 1374.683447    | 687.845362       | 1373.699431    | 687.353354       | 9  |
| 5  | 540.302789  | 270.655033      |                |                  | 522.292224     | 261.649750       | L    | 1304.677968 | 652.842622      | 1287.651419    | 644.329348       | 1286.667403    | 643.837340       | 8  |
| 6  | 668.361367  | 334.684322      | 651.334818     | 326.171047       | 650.350802     | 325.679039       | Q    | 1191.593904 | 596.300590      | 1174.567355    | 587.787316       | 1173.583339    | 587.295308       | 7  |
| 7  | 805.420279  | 403.213778      | 788.393730     | 394.700503       | 787.409714     | 394.208495       | H    | 1063.535326 | 532.271301      | 1046.508777    | 523.758027       | 1045.524761    | 523.266018       | 6  |
| 8  | 902.473043  | 451.740160      | 885.446494     | 443.226885       | 884.462478     | 442.734877       | P    | 926.476414  | 463.741845      | 909.449865     | 455.228571       | 908.465849     | 454.736563       | 5  |
| 9  | 1016.515970 | 508.761623      | 999.489421     | 500.248349       | 998.505405     | 499.756341       | N    | 829.423650  | 415.215463      | 812.397101     | 406.702189       | 811.413085     | 406.210181       | 4  |
| 10 | 1145.558563 | 573.282920      | 1128.532014    | 564.769645       | 1127.547998    | 564.277637       | E    | 715.380723  | 358.194000      | 698.354174     | 349.680725       | 697.370158     | 349.188717       | 3  |
| 11 | 1584.783889 | 792.895583      | 1567.757340    | 784.382308       | 1566.773324    | 783.890300       | Q    | 586.338130  | 293.672703      | 569.311581     | 285.159429       |                |                  | 2  |
| 12 |             |                 |                |                  |                |                  | K    | 147.112804  | 74.060040       | 130.086255     | 65.546765        |                |                  | 1  |

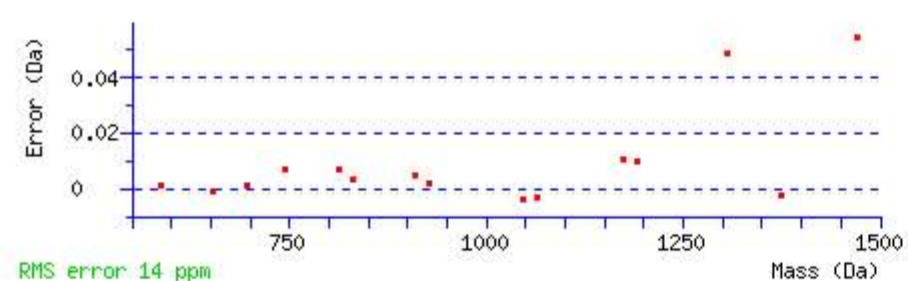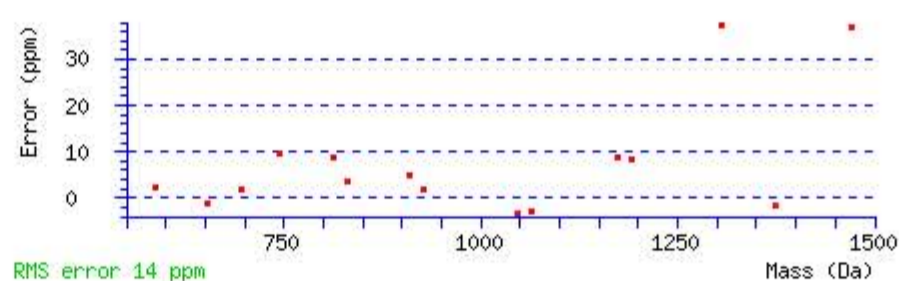

NCBI BLAST search of [ELPSLQHPNEQK](#)

(Parameters: blastp, nr protein database, expect=20000, no filter, PAM30)

Other BLAST [web gateways](#)

All matches to this query

| Score | Mr(calc):   | Delta    | Sequence                     |
|-------|-------------|----------|------------------------------|
| 26.4  | 1729.882111 | 0.001901 | <a href="#">ELPSLQHPNEQK</a> |

Mascot: <http://www.matrixscience.com/>

# MASCOT Search Results

## Peptide View

MS/MS Fragmentation of **EVGPPLPQEAVPLQK**

Found in **ECM1\_HUMAN**, Extracellular matrix protein 1 OS=Homo sapiens GN=ECM1 PE=1 SV=2

Match to Query 37690: 1912.059222 from(638.360350,3+) rtinseconds(2266) index(6337)

Title: Locus:1.1.1.3309.12 File:"2013-07-02 CLN FXIII 180 min 3rd F 1.wiff"

Data file C:\Program Files (x86)\Matrix Science\Mascot Daemon\mgf9 FXIII 180 min 3rd\mascot\_daemon\_merge.mgf

Click mouse within plot area to zoom in by factor of two about that point

Or, Plot from  to  Da

Label all possible matches  Label matches used for scoring

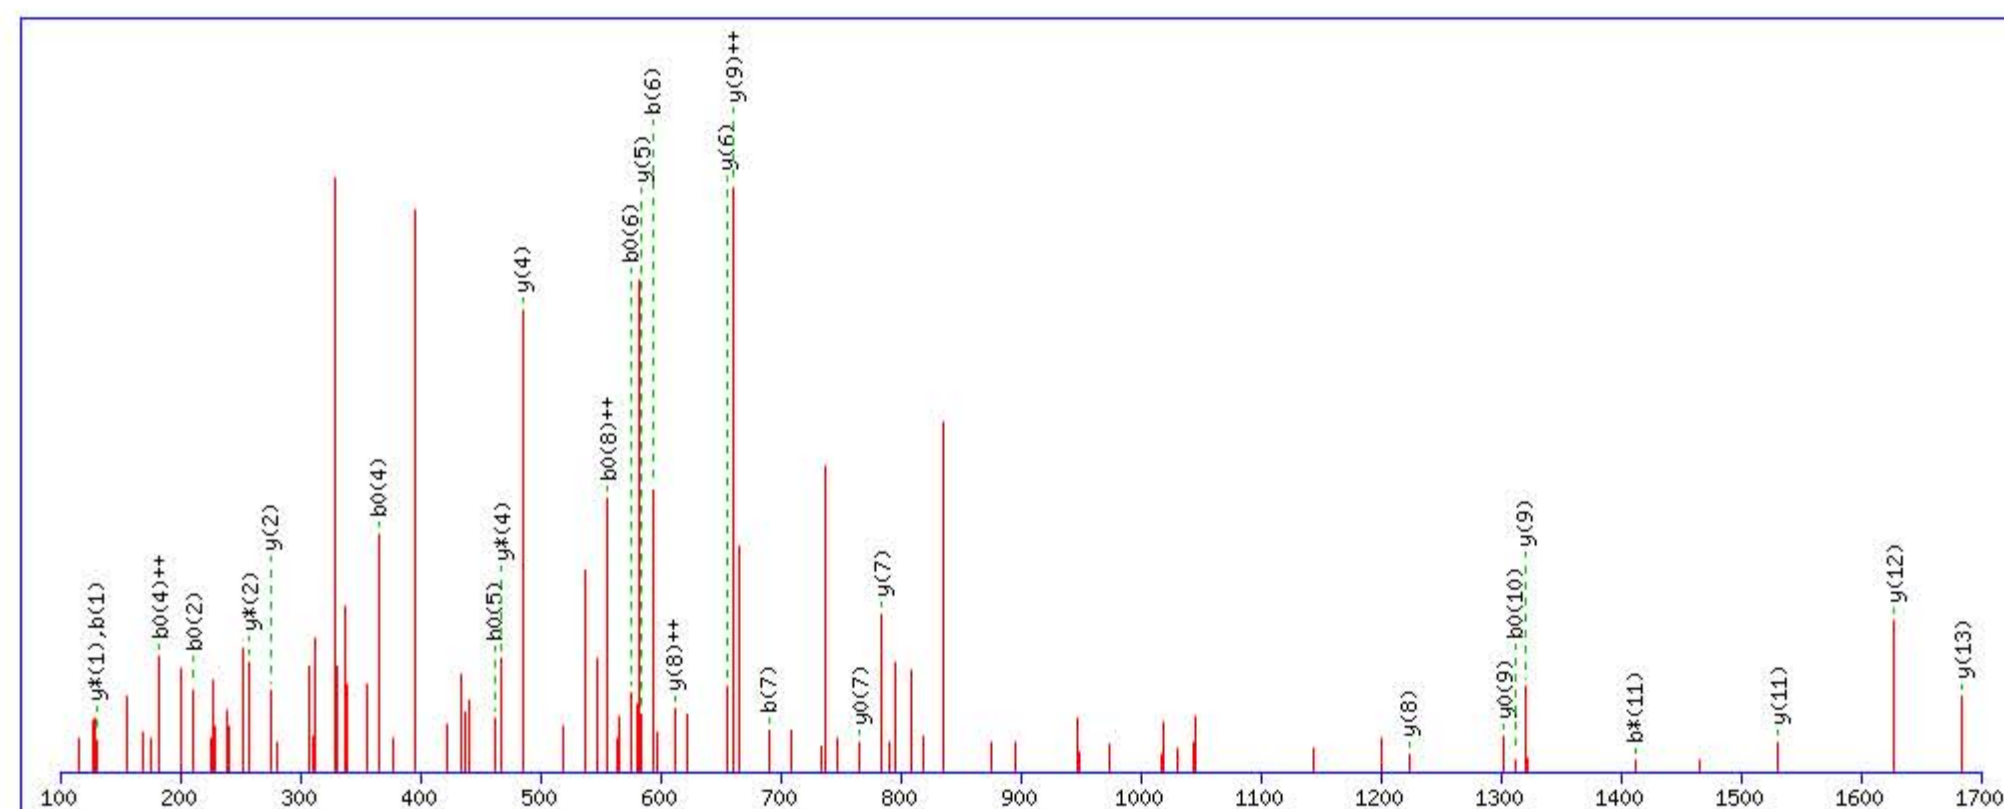

Monoisotopic mass of neutral peptide Mr(calc): 1912.049194

Fixed modifications: Carbamidomethyl (C) (apply to specified residues or termini only)

Variable modifications:

Q8 : Biotin:Thermo-21345 (Q)

Ions Score: 28 Expect: 0.023

Matches : 28/142 fragment ions using 90 most intense peaks [\(help\)](#)

| #  | b                 | b <sup>++</sup> | b <sup>+</sup>     | b <sup>+++</sup> | b <sup>0</sup>     | b <sup>0++</sup>  | Seq. | y                  | y <sup>++</sup>   | y <sup>+</sup>    | y <sup>+++</sup> | y <sup>0</sup>     | y <sup>0++</sup> | #  |
|----|-------------------|-----------------|--------------------|------------------|--------------------|-------------------|------|--------------------|-------------------|-------------------|------------------|--------------------|------------------|----|
| 1  | <b>130.049869</b> | 65.528572       |                    |                  | 112.039304         | 56.523290         | E    |                    |                   |                   |                  |                    |                  | 15 |
| 2  | 229.118283        | 115.062780      |                    |                  | <b>211.107718</b>  | 106.057497        | V    | 1784.013891        | 892.510583        | 1766.987342       | 883.997309       | 1766.003326        | 883.505301       | 14 |
| 3  | 286.139747        | 143.573512      |                    |                  | 268.129182         | 134.568229        | G    | <b>1684.945477</b> | 842.976377        | 1667.918928       | 834.463102       | 1666.934912        | 833.971094       | 13 |
| 4  | 383.192511        | 192.099894      |                    |                  | <b>365.181946</b>  | <b>183.094611</b> | P    | <b>1627.924013</b> | 814.465645        | 1610.897464       | 805.952370       | 1609.913448        | 805.460362       | 12 |
| 5  | 480.245275        | 240.626276      |                    |                  | <b>462.234710</b>  | 231.620993        | P    | <b>1530.871249</b> | 765.939263        | 1513.844700       | 757.425988       | 1512.860684        | 756.933980       | 11 |
| 6  | <b>593.329339</b> | 297.168308      |                    |                  | <b>575.318774</b>  | 288.163025        | L    | 1433.818485        | 717.412881        | 1416.791936       | 708.899606       | 1415.807920        | 708.407598       | 10 |
| 7  | <b>690.382103</b> | 345.694690      |                    |                  | 672.371538         | 336.689407        | P    | <b>1320.734421</b> | <b>660.870848</b> | 1303.707872       | 652.357574       | <b>1302.723856</b> | 651.865566       | 9  |
| 8  | 1129.607429       | 565.307353      | 1112.580880        | 556.794078       | 1111.596864        | <b>556.302070</b> | Q    | <b>1223.681657</b> | <b>612.344466</b> | 1206.655108       | 603.831192       | 1205.671092        | 603.339184       | 8  |
| 9  | 1258.650022       | 629.828649      | 1241.623473        | 621.315375       | 1240.639457        | 620.823367        | E    | <b>784.456331</b>  | 392.731803        | 767.429782        | 384.218529       | <b>766.445766</b>  | 383.726521       | 7  |
| 10 | 1329.687136       | 665.347206      | 1312.660587        | 656.833932       | <b>1311.676571</b> | 656.341924        | A    | <b>655.413738</b>  | 328.210507        | 638.387189        | 319.697232       |                    |                  | 6  |
| 11 | 1428.755550       | 714.881413      | <b>1411.729001</b> | 706.368139       | 1410.744985        | 705.876131        | V    | <b>584.376624</b>  | 292.691950        | 567.350075        | 284.178676       |                    |                  | 5  |
| 12 | 1525.808314       | 763.407795      | 1508.781765        | 754.894521       | 1507.797749        | 754.402513        | P    | <b>485.308210</b>  | 243.157743        | <b>468.281661</b> | 234.644468       |                    |                  | 4  |
| 13 | 1638.892378       | 819.949827      | 1621.865829        | 811.436553       | 1620.881813        | 810.944545        | L    | 388.255446         | 194.631361        | 371.228897        | 186.118086       |                    |                  | 3  |
| 14 | 1766.950956       | 883.979116      | 1749.924407        | 875.465842       | 1748.940391        | 874.973833        | Q    | <b>275.171382</b>  | 138.089329        | <b>258.144833</b> | 129.576054       |                    |                  | 2  |
| 15 |                   |                 |                    |                  |                    |                   | K    | 147.112804         | 74.060040         | <b>130.086255</b> | 65.546765        |                    |                  | 1  |

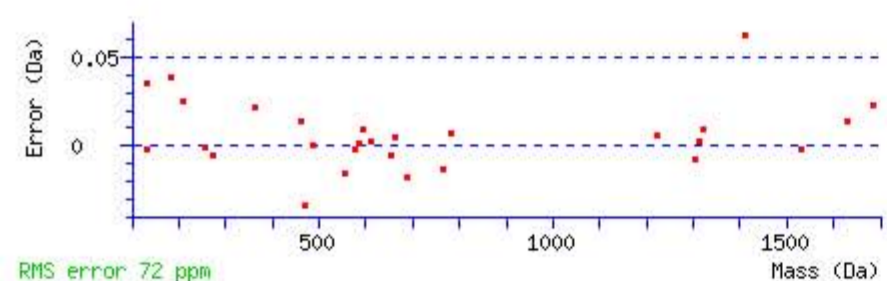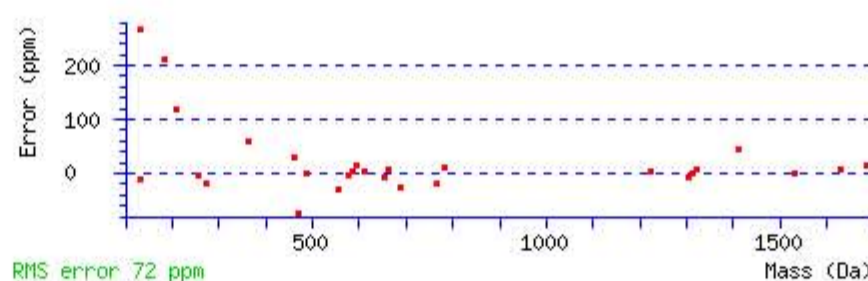

NCBI BLAST search of **EVGPPLPQEAVPLQK**

(Parameters: blastp, nr protein database, expect=20000, no filter, PAM30)

Other BLAST [web gateways](#)

All matches to this query

| Score | Mr(calc):   | Delta    | Sequence                        |
|-------|-------------|----------|---------------------------------|
| 28.2  | 1912.049194 | 0.010028 | <a href="#">EVGPPLPQEAVPLQK</a> |
| 19.8  | 1912.049194 | 0.010028 | <a href="#">EVGPPLPQEAVPLQK</a> |

Mascot: <http://www.matrixscience.com/>

# MASCOT Search Results

## Peptide View

MS/MS Fragmentation of **VTPNLMGHL CGNQR**

Found in **ECM1\_HUMAN**, Extracellular matrix protein 1 OS=Homo sapiens GN=ECM1 PE=1 SV=2

Match to Query 37841: 1922.931072 from(641.984300,3+) rtinseconds(1674) index(3091)

Title: Locus:1.1.1.3102.11 File:"2013-07-02 CLN FXIII 180 min 3rd F 1.wiff"

Data file C:\Program Files (x86)\Matrix Science\Mascot Daemon\mgf9 FXIII 180 min 3rd\mascot\_daemon\_merge.mgf

Click mouse within plot area to zoom in by factor of two about that point

Or, Plot from  to  Da

Label all possible matches  Label matches used for scoring

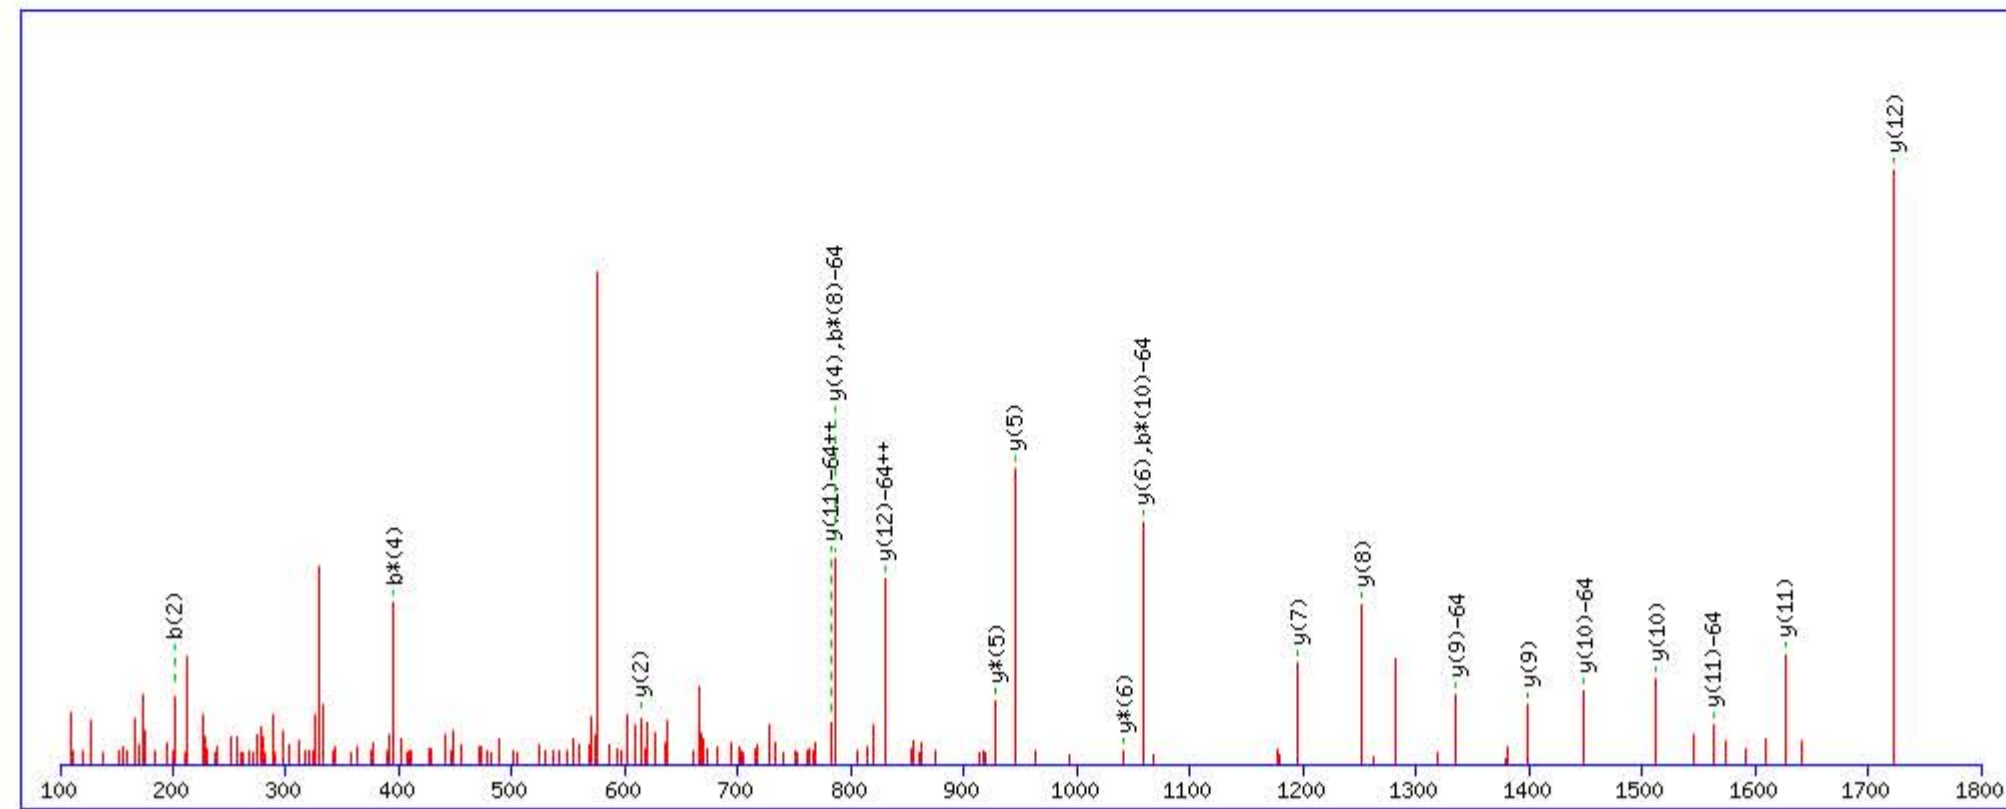

Monoisotopic mass of neutral peptide Mr(calc): 1922.927734

Fixed modifications: Carbamidomethyl (C) (apply to specified residues or termini only)

Variable modifications:

M6 : Oxidation (M), with neutral losses 0.000000 (shown in table), 63.998285

Q13 : Biotin:Thermo-21345 (Q)

Ions Score: 60 Expect: 1.9e-005

Matches : 21/194 fragment ions using 32 most intense peaks [\(help\)](#)

| #  | b           | b <sup>++</sup> | b <sup>*</sup> | b <sup>+++</sup> | b <sup>0</sup> | b <sup>0++</sup> | Seq. | y           | y <sup>++</sup> | y <sup>*</sup> | y <sup>+++</sup> | y <sup>0</sup> | y <sup>0++</sup> | #  |
|----|-------------|-----------------|----------------|------------------|----------------|------------------|------|-------------|-----------------|----------------|------------------|----------------|------------------|----|
| 1  | 100.075690  | 50.541483       |                |                  |                |                  | V    |             |                 |                |                  |                |                  | 14 |
| 2  | 201.123369  | 101.065322      |                |                  | 183.112804     | 92.060040        | T    | 1824.866592 | 912.936934      | 1807.840043    | 904.423659       | 1806.856027    | 903.931651       | 13 |
| 3  | 298.176133  | 149.591704      |                |                  | 280.165568     | 140.586422       | P    | 1723.818913 | 862.413094      | 1706.792364    | 853.899820       |                |                  | 12 |
| 4  | 412.219060  | 206.613168      | 395.192511     | 198.099894       | 394.208495     | 197.607886       | N    | 1626.766149 | 813.886712      | 1609.739600    | 805.373438       |                |                  | 11 |
| 5  | 525.303124  | 263.155200      | 508.276575     | 254.641926       | 507.292559     | 254.149918       | L    | 1512.723222 | 756.865249      | 1495.696673    | 748.351974       |                |                  | 10 |
| 6  | 672.338524  | 336.672900      | 655.311975     | 328.159626       | 654.327959     | 327.667618       | M    | 1399.639158 | 700.323217      | 1382.612609    | 691.809943       |                |                  | 9  |
| 7  | 729.359988  | 365.183632      | 712.333439     | 356.670358       | 711.349423     | 356.178350       | G    | 1252.603758 | 626.805517      | 1235.577209    | 618.292243       |                |                  | 8  |
| 8  | 866.418900  | 433.713088      | 849.392351     | 425.199814       | 848.408335     | 424.707806       | H    | 1195.582294 | 598.294785      | 1178.555745    | 589.781511       |                |                  | 7  |
| 9  | 979.502964  | 490.255120      | 962.476415     | 481.741846       | 961.492399     | 481.249838       | L    | 1058.523382 | 529.765329      | 1041.496833    | 521.252055       |                |                  | 6  |
| 10 | 1139.533613 | 570.270445      | 1122.507064    | 561.757170       | 1121.523048    | 561.265162       | C    | 945.439318  | 473.223297      | 928.412769     | 464.710022       |                |                  | 5  |
| 11 | 1196.555077 | 598.781177      | 1179.528528    | 590.267902       | 1178.544512    | 589.775894       | G    | 785.408669  | 393.207972      | 768.382120     | 384.694698       |                |                  | 4  |
| 12 | 1310.598004 | 655.802640      | 1293.571455    | 647.289366       | 1292.587439    | 646.797357       | N    | 728.387205  | 364.697241      | 711.360656     | 356.183966       |                |                  | 3  |
| 13 | 1749.823330 | 875.415303      | 1732.796781    | 866.902029       | 1731.812765    | 866.410020       | Q    | 614.344278  | 307.675777      | 597.317729     | 299.162503       |                |                  | 2  |
| 14 |             |                 |                |                  |                |                  | R    | 175.118952  | 88.063114       | 158.092403     | 79.549839        |                |                  | 1  |

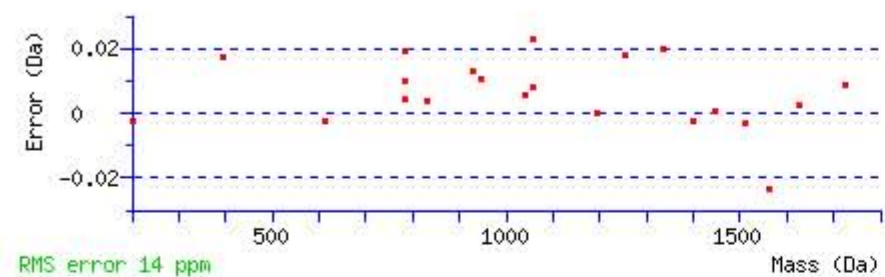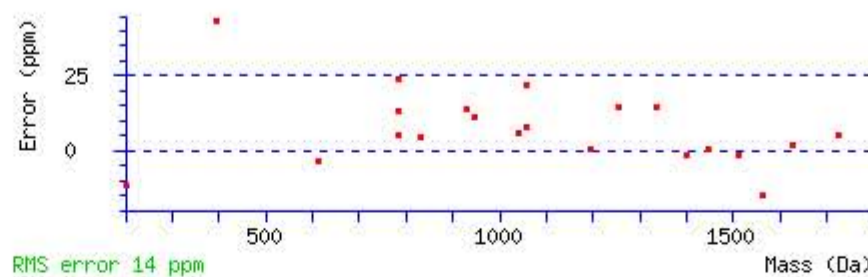

NCBI BLAST search of **VTPNLMGHL CGNQR**

(Parameters: blastp, nr protein database, expect=20000, no filter, PAM30)

Other BLAST [web gateways](#)

All matches to this query

| Score | Mr(calc):   | Delta    | Sequence                        |
|-------|-------------|----------|---------------------------------|
| 60.4  | 1922.927734 | 0.003338 | <a href="#">VTPNLMGHL CGNQR</a> |

Mascot: <http://www.matrixscience.com/>

# MASCOT Search Results

## Peptide View

MS/MS Fragmentation of **EVGPPLPQEAVPLQK**

Found in **ECM1\_HUMAN**, Extracellular matrix protein 1 OS=Homo sapiens GN=ECM1 PE=1 SV=2

Match to Query 43674: 2223.248428 from(1112.631490,2+) rtinseconds(2503) index(7561)

Title: Locus:1.1.1.3391.12 File:"2013-07-02 CLN FXIII 180 min 3rd F 1.wiff"

Data file C:\Program Files (x86)\Matrix Science\Mascot Daemon\mgf\9 FXIII 180 min 3rd\mascot\_daemon\_merge.mgf

Click mouse within plot area to zoom in by factor of two about that point

Or, Plot from  to  Da

Label all possible matches  Label matches used for scoring

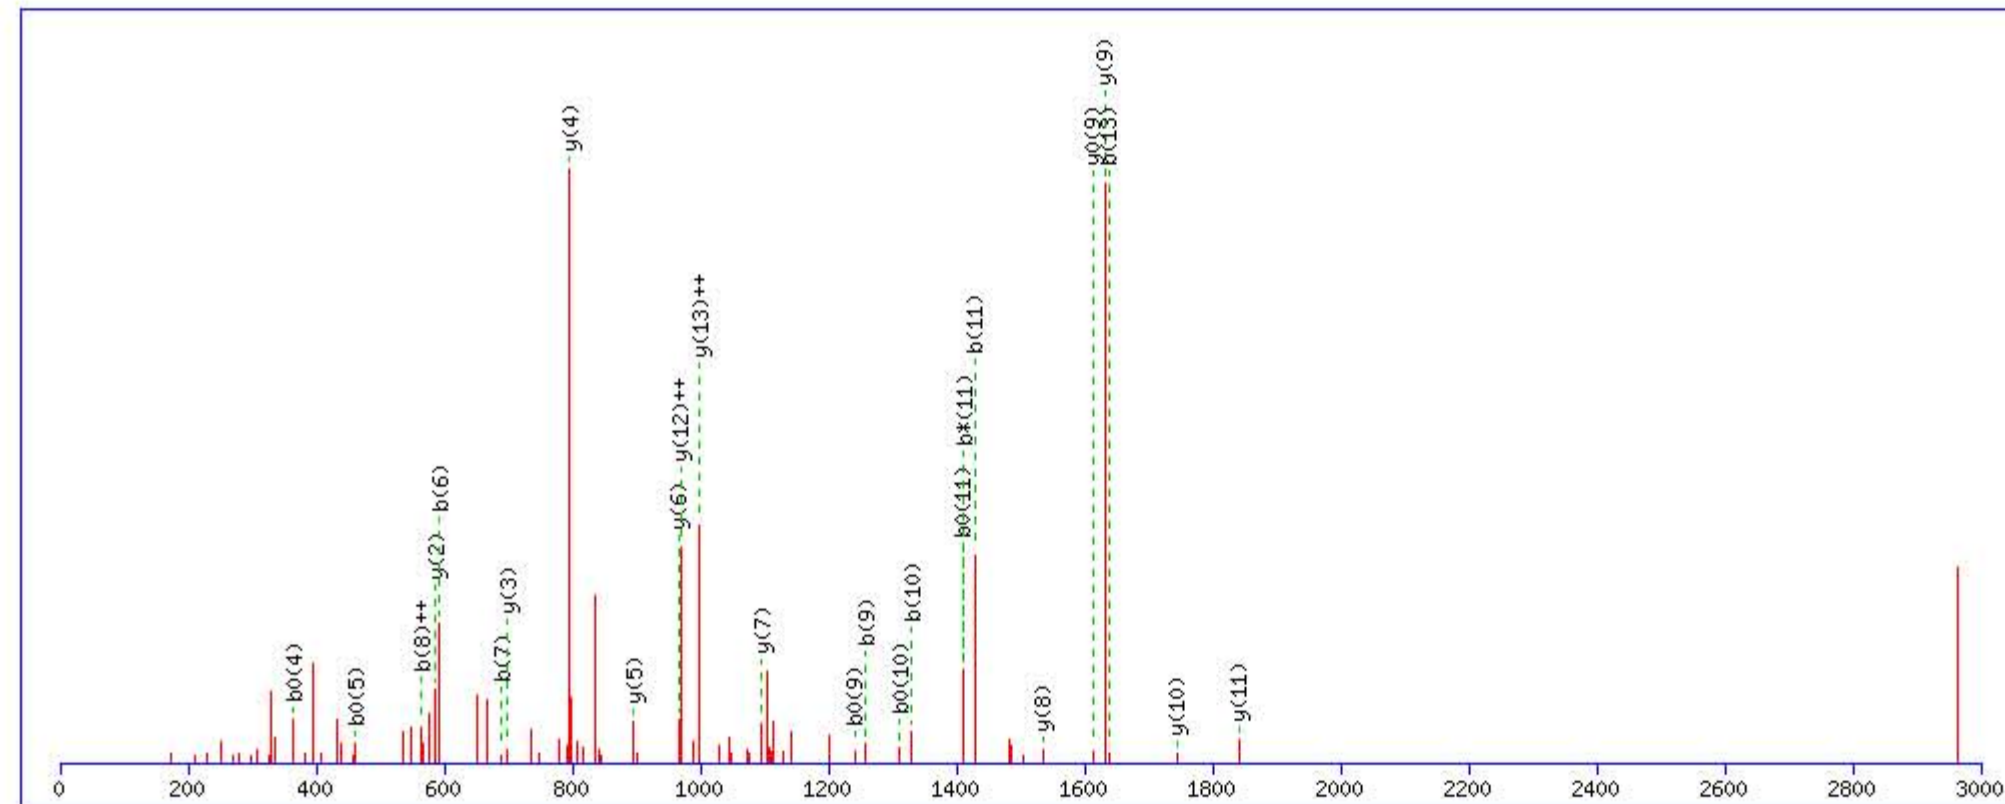

Monoisotopic mass of neutral peptide Mr(calc): 2223.215942

Fixed modifications: Carbamidomethyl (C) (apply to specified residues or termini only)

Variable modifications:

Q8 : Biotin:Thermo-21345 (Q)

Q14 : Biotin:Thermo-21345 (Q)

Ions Score: 45 Expect: 0.00034

Matches : 26/142 fragment ions using 58 most intense peaks [\(help\)](#)

| #  | b           | b <sup>++</sup> | b <sup>+</sup> | b <sup>+++</sup> | b <sup>0</sup> | b <sup>0++</sup> | Seq. | y           | y <sup>++</sup> | y <sup>+</sup> | y <sup>+++</sup> | y <sup>0</sup> | y <sup>0++</sup> | #  |
|----|-------------|-----------------|----------------|------------------|----------------|------------------|------|-------------|-----------------|----------------|------------------|----------------|------------------|----|
| 1  | 130.049869  | 65.528572       |                |                  | 112.039304     | 56.523290        | E    |             |                 |                |                  |                |                  | 15 |
| 2  | 229.118283  | 115.062780      |                |                  | 211.107718     | 106.057497       | V    | 2095.180639 | 1048.093957     | 2078.154090    | 1039.580683      | 2077.170074    | 1039.088675      | 14 |
| 3  | 286.139747  | 143.573512      |                |                  | 268.129182     | 134.568229       | G    | 1996.112225 | 998.559751      | 1979.085676    | 990.046476       | 1978.101660    | 989.554468       | 13 |
| 4  | 383.192511  | 192.099894      |                |                  | 365.181946     | 183.094611       | P    | 1939.090761 | 970.049019      | 1922.064212    | 961.535744       | 1921.080196    | 961.043736       | 12 |
| 5  | 480.245275  | 240.626276      |                |                  | 462.234710     | 231.620993       | P    | 1842.037997 | 921.522637      | 1825.011448    | 913.009362       | 1824.027432    | 912.517354       | 11 |
| 6  | 593.329339  | 297.168308      |                |                  | 575.318774     | 288.163025       | L    | 1744.985233 | 872.996255      | 1727.958684    | 864.482980       | 1726.974668    | 863.990972       | 10 |
| 7  | 690.382103  | 345.694690      |                |                  | 672.371538     | 336.689407       | P    | 1631.901169 | 816.454223      | 1614.874620    | 807.940948       | 1613.890604    | 807.448940       | 9  |
| 8  | 1129.607429 | 565.307353      | 1112.580880    | 556.794078       | 1111.596864    | 556.302070       | Q    | 1534.848405 | 767.927841      | 1517.821856    | 759.414566       | 1516.837840    | 758.922558       | 8  |
| 9  | 1258.650022 | 629.828649      | 1241.623473    | 621.315375       | 1240.639457    | 620.823367       | E    | 1095.623079 | 548.315178      | 1078.596530    | 539.801903       | 1077.612514    | 539.309895       | 7  |
| 10 | 1329.687136 | 665.347206      | 1312.660587    | 656.833932       | 1311.676571    | 656.341924       | A    | 966.580486  | 483.793881      | 949.553937     | 475.280607       |                |                  | 6  |
| 11 | 1428.755550 | 714.881413      | 1411.729001    | 706.368139       | 1410.744985    | 705.876131       | V    | 895.543372  | 448.275324      | 878.516823     | 439.762050       |                |                  | 5  |
| 12 | 1525.808314 | 763.407795      | 1508.781765    | 754.894521       | 1507.797749    | 754.402513       | P    | 796.474958  | 398.741117      | 779.448409     | 390.227843       |                |                  | 4  |
| 13 | 1638.892378 | 819.949827      | 1621.865829    | 811.436553       | 1620.881813    | 810.944545       | L    | 699.422194  | 350.214735      | 682.395645     | 341.701461       |                |                  | 3  |
| 14 | 2078.117704 | 1039.562490     | 2061.091155    | 1031.049215      | 2060.107139    | 1030.557207      | Q    | 586.338130  | 293.672703      | 569.311581     | 285.159429       |                |                  | 2  |
| 15 |             |                 |                |                  |                |                  | K    | 147.112804  | 74.060040       | 130.086255     | 65.546765        |                |                  | 1  |

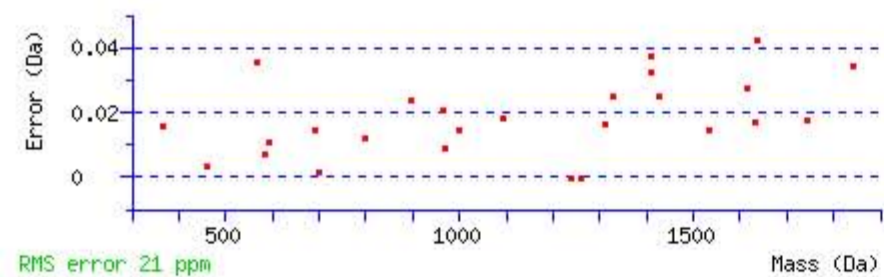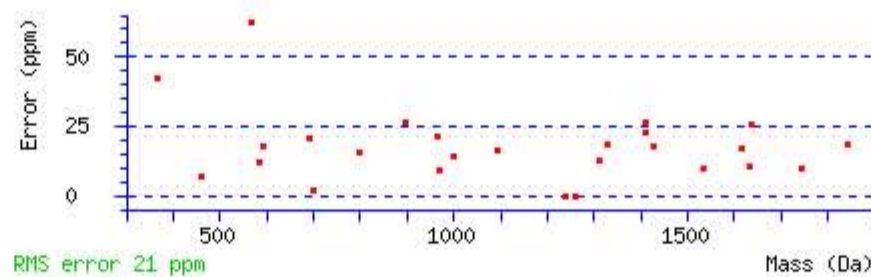

NCBI BLAST search of **EVGPPLPQEAVPLQK**

(Parameters: blastp, nr protein database, expect=20000, no filter, PAM30)

Other BLAST [web gateways](#)

All matches to this query

| Score | Mr(calc):   | Delta    | Sequence                        |
|-------|-------------|----------|---------------------------------|
| 44.5  | 2223.215942 | 0.032486 | <a href="#">EVGPPLPQEAVPLQK</a> |

Mascot: <http://www.matrixscience.com/>

# MASCOT Search Results

## Peptide View

MS/MS Fragmentation of **FSCFQEEAPQPHYQLR**

Found in **ECM1\_HUMAN**, Extracellular matrix protein 1 OS=Homo sapiens GN=ECM1 PE=1 SV=2

Match to Query 45810: 2347.080942 from(783.367590,3+) rtinseconds(1955) index(18794)

Title: Locus:1.1.1.3246.21 File:"2013-07-02 CLN FXIII 180 min 3rd F 2.wiff"

Data file C:\Program Files (x86)\Matrix Science\Mascot Daemon\mgf9 FXIII 180 min 3rd\mascot\_daemon\_merge.mgf

Click mouse within plot area to zoom in by factor of two about that point

Or, Plot from  to  Da

Label all possible matches  Label matches used for scoring

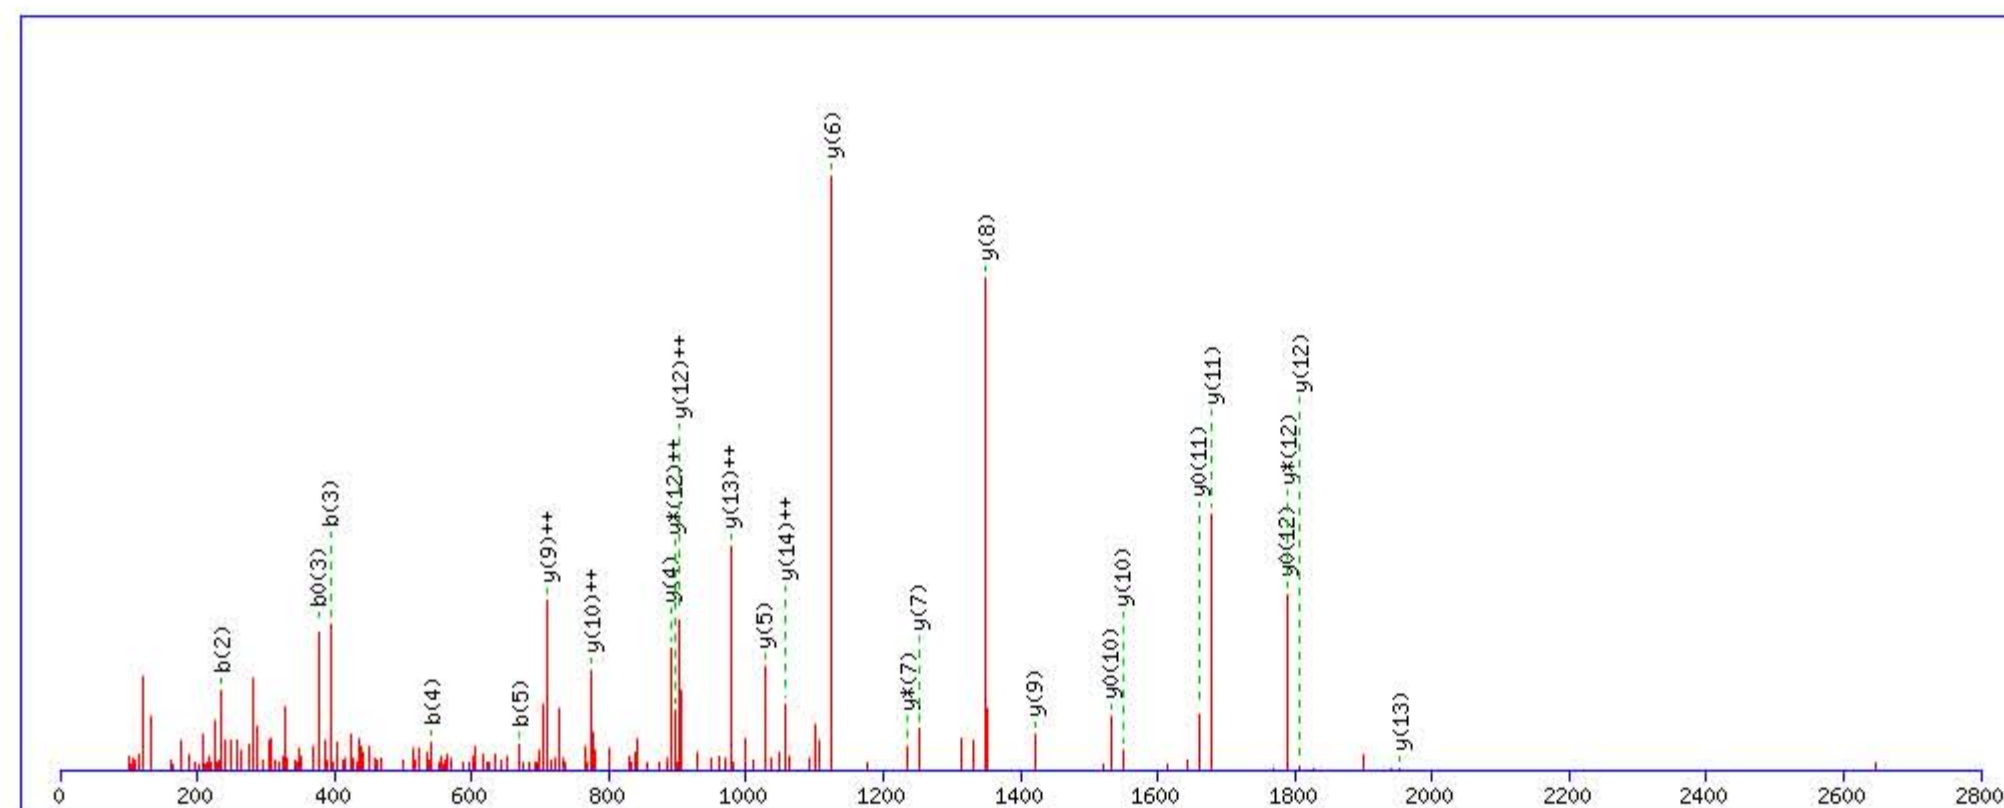

Monoisotopic mass of neutral peptide Mr(calc): 2347.087784

Fixed modifications: Carbamidomethyl (C) (apply to specified residues or termini only)

Variable modifications:

Q14 : Biotin:Thermo-21345 (Q)

Ions Score: 64 Expect: 5e-006

Matches : 26/152 fragment ions using 38 most intense peaks [\(help\)](#)

| #  | b                 | b <sup>++</sup> | b <sup>*</sup> | b <sup>*++</sup> | b <sup>0</sup>    | b <sup>0++</sup> | Seq. | y                  | y <sup>++</sup>    | y <sup>*</sup>     | y <sup>*++</sup>  | y <sup>0</sup>     | y <sup>0++</sup> | #  |
|----|-------------------|-----------------|----------------|------------------|-------------------|------------------|------|--------------------|--------------------|--------------------|-------------------|--------------------|------------------|----|
| 1  | 148.075690        | 74.541483       |                |                  |                   |                  | F    |                    |                    |                    |                   |                    |                  | 16 |
| 2  | <b>235.107718</b> | 118.057497      |                |                  | 217.097153        | 109.052214       | S    | 2201.026658        | 1101.016967        | 2184.000109        | 1092.503692       | 2183.016093        | 1092.011684      | 15 |
| 3  | <b>395.138367</b> | 198.072821      |                |                  | <b>377.127802</b> | 189.067539       | C    | 2113.994630        | <b>1057.500953</b> | 2096.968081        | 1048.987678       | 2095.984065        | 1048.495670      | 14 |
| 4  | <b>542.206781</b> | 271.607029      |                |                  | 524.196216        | 262.601746       | F    | <b>1953.963981</b> | <b>977.485629</b>  | 1936.937432        | 968.972354        | 1935.953416        | 968.480346       | 13 |
| 5  | <b>670.265359</b> | 335.636318      | 653.238810     | 327.123043       | 652.254794        | 326.631035       | Q    | <b>1806.895567</b> | <b>903.951422</b>  | <b>1789.869018</b> | <b>895.438147</b> | <b>1788.885002</b> | 894.946139       | 12 |
| 6  | 799.307952        | 400.157614      | 782.281403     | 391.644340       | 781.297387        | 391.152332       | E    | <b>1678.836989</b> | 839.922133         | 1661.810440        | 831.408858        | <b>1660.826424</b> | 830.916850       | 11 |
| 7  | 928.350545        | 464.678911      | 911.323996     | 456.165636       | 910.339980        | 455.673628       | E    | <b>1549.794396</b> | <b>775.400836</b>  | 1532.767847        | 766.887562        | <b>1531.783831</b> | 766.395554       | 10 |
| 8  | 999.387659        | 500.197468      | 982.361110     | 491.684193       | 981.377094        | 491.192185       | A    | <b>1420.751803</b> | <b>710.879540</b>  | 1403.725254        | 702.366265        |                    |                  | 9  |
| 9  | 1096.440423       | 548.723850      | 1079.413874    | 540.210575       | 1078.429858       | 539.718567       | P    | <b>1349.714689</b> | 675.360983         | 1332.688140        | 666.847708        |                    |                  | 8  |
| 10 | 1224.499001       | 612.753138      | 1207.472452    | 604.239864       | 1206.488436       | 603.747856       | Q    | <b>1252.661925</b> | 626.834601         | <b>1235.635376</b> | 618.321326        |                    |                  | 7  |
| 11 | 1321.551765       | 661.279520      | 1304.525216    | 652.766246       | 1303.541200       | 652.274238       | P    | <b>1124.603347</b> | 562.805312         | 1107.576798        | 554.292037        |                    |                  | 6  |
| 12 | 1458.610677       | 729.808976      | 1441.584128    | 721.295702       | 1440.600112       | 720.803694       | H    | <b>1027.550583</b> | 514.278930         | 1010.524034        | 505.765655        |                    |                  | 5  |
| 13 | 1621.674006       | 811.340641      | 1604.647457    | 802.827367       | 1603.663441       | 802.335358       | Y    | <b>890.491671</b>  | 445.749474         | 873.465122         | 437.236199        |                    |                  | 4  |
| 14 | 2060.899332       | 1030.953304     | 2043.872783    | 1022.440030      | 2042.888767       | 1021.948022      | Q    | 727.428342         | 364.217809         | 710.401793         | 355.704535        |                    |                  | 3  |
| 15 | 2173.983396       | 1087.495336     | 2156.956847    | 1078.982061      | 2155.972831       | 1078.490053      | L    | 288.203016         | 144.605146         | 271.176467         | 136.091872        |                    |                  | 2  |
| 16 |                   |                 |                |                  |                   |                  | R    | 175.118952         | 88.063114          | 158.092403         | 79.549839         |                    |                  | 1  |

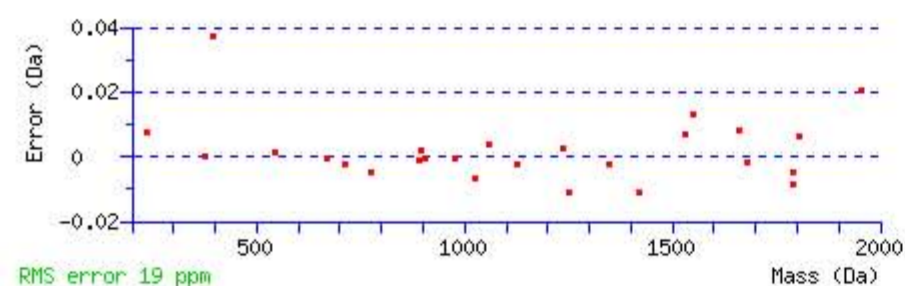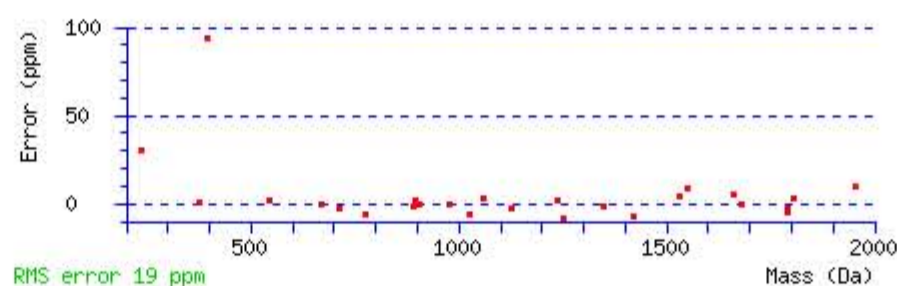

NCBI BLAST search of [FSCFQEEAPQPHYQLR](#)

(Parameters: blastp, nr protein database, expect=20000, no filter, PAM30)

Other BLAST [web gateways](#)

All matches to this query

| Score | Mr(calc):   | Delta     | Sequence                         |
|-------|-------------|-----------|----------------------------------|
| 64.5  | 2347.087784 | -0.006842 | <a href="#">FSCFQEEAPQPHYQLR</a> |
| 31.7  | 2347.087784 | -0.006842 | <a href="#">FSCFQEEAPQPHYQLR</a> |
| 1.1   | 2347.087784 | -0.006842 | <a href="#">FSCFQEEAPQPHYQLR</a> |

# Mascot Search Results

## Peptide View

MS/MS Fragmentation of **VNDAQEYR**

Found in **FETUB\_HUMAN**, Fetuin-B OS=Homo sapiens GN=FETUB PE=1 SV=2

Match to Query 20430: 1304.618008 from(653.316280,2+) rtinseconds(1497) index(57981)

Title: Locus:1.1.1.1432.21 File:"2013-07-02 CLN FXIII 180 min 3rd FT.wiff"

Data file C:\Program Files (x86)\Matrix Science\Mascot Daemon\mgf9 FXIII 180 min 3rd\mascot\_daemon\_merge.mgf

Click mouse within plot area to zoom in by factor of two about that point

Or, Plot from  to  Da

Label all possible matches  Label matches used for scoring

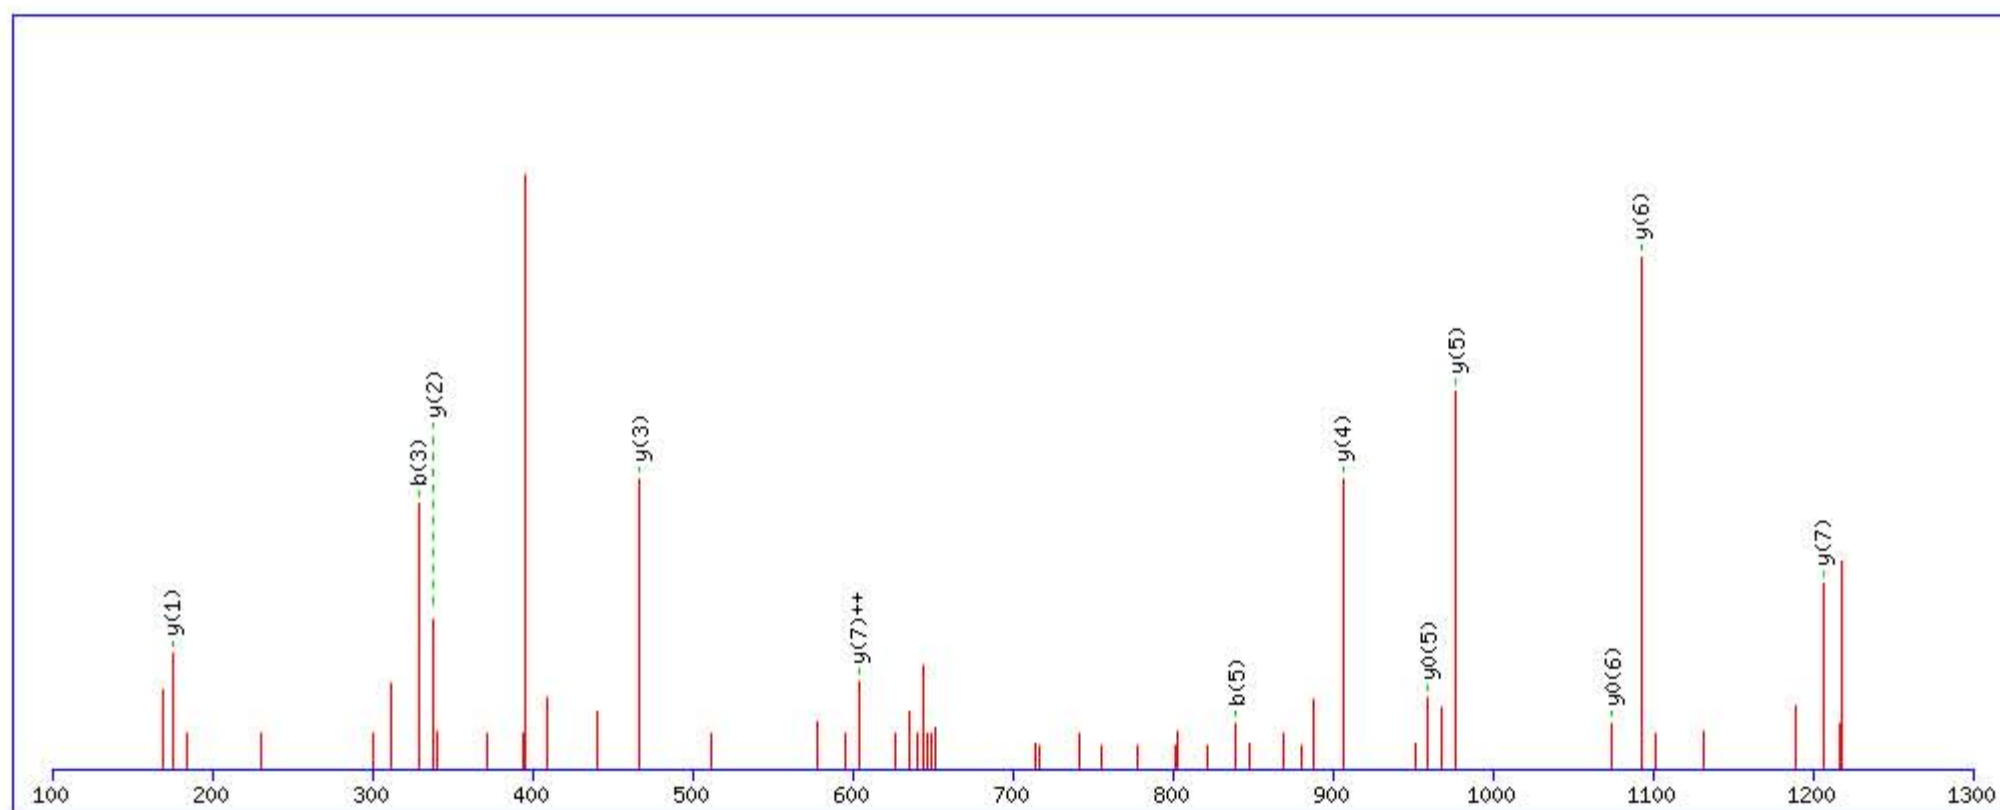

Monoisotopic mass of neutral peptide  $M_r(\text{calc})$ : 1304.618301

Fixed modifications: Carbamidomethyl (C) (apply to specified residues or termini only)

Variable modifications:

Q5 : Biotin:Thermo-21345 (Q)

Ions Score: 49 Expect: 0.00019

Matches : 12/74 fragment ions using 20 most intense peaks [\(help\)](#)

| # | b           | b <sup>++</sup> | b <sup>+</sup> | b <sup>+++</sup> | b <sup>0</sup> | b <sup>0++</sup> | Seq. | y           | y <sup>++</sup> | y <sup>+</sup> | y <sup>+++</sup> | y <sup>0</sup> | y <sup>0++</sup> | # |
|---|-------------|-----------------|----------------|------------------|----------------|------------------|------|-------------|-----------------|----------------|------------------|----------------|------------------|---|
| 1 | 100.075690  | 50.541483       |                |                  |                |                  | V    |             |                 |                |                  |                |                  | 8 |
| 2 | 214.118617  | 107.562947      | 197.092068     | 99.049672        |                |                  | N    | 1206.557184 | 603.782230      | 1189.530635    | 595.268956       | 1188.546619    | 594.776948       | 7 |
| 3 | 329.145560  | 165.076418      | 312.119011     | 156.563144       | 311.134995     | 156.071136       | D    | 1092.514257 | 546.760767      | 1075.487708    | 538.247492       | 1074.503692    | 537.755484       | 6 |
| 4 | 400.182674  | 200.594975      | 383.156125     | 192.081700       | 382.172109     | 191.589692       | A    | 977.487314  | 489.247295      | 960.460765     | 480.734021       | 959.476749     | 480.242013       | 5 |
| 5 | 839.408000  | 420.207638      | 822.381451     | 411.694364       | 821.397435     | 411.202356       | Q    | 906.450200  | 453.728738      | 889.423651     | 445.215464       | 888.439635     | 444.723456       | 4 |
| 6 | 968.450593  | 484.728935      | 951.424044     | 476.215660       | 950.440028     | 475.723652       | E    | 467.224874  | 234.116075      | 450.198325     | 225.602801       | 449.214309     | 225.110793       | 3 |
| 7 | 1131.513922 | 566.260599      | 1114.487373    | 557.747325       | 1113.503357    | 557.255317       | Y    | 338.182281  | 169.594778      | 321.155732     | 161.081504       |                |                  | 2 |
| 8 |             |                 |                |                  |                |                  | R    | 175.118952  | 88.063114       | 158.092403     | 79.549839        |                |                  | 1 |

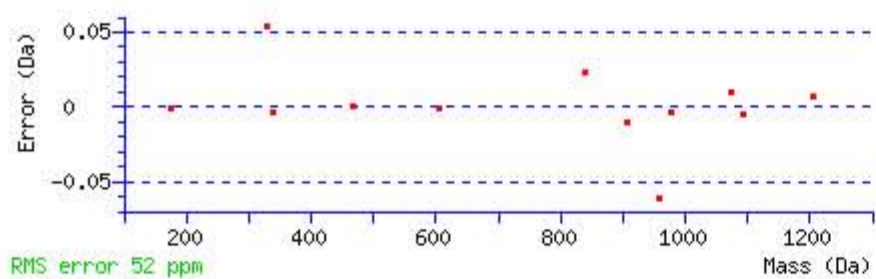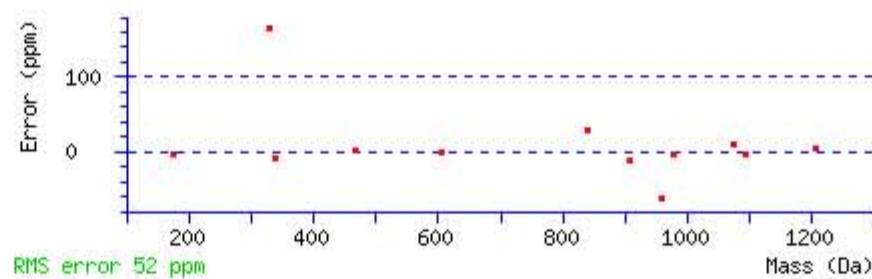

NCBI BLAST search of [VNDAQEYR](#)

(Parameters: blastp, nr protein database, expect=20000, no filter, PAM30)

Other BLAST [web gateways](#)

All matches to this query

| Score | $M_r(\text{calc})$ : | Delta     | Sequence                 |
|-------|----------------------|-----------|--------------------------|
| 48.7  | 1304.618301          | -0.000293 | <a href="#">VNDAQEYR</a> |

Mascot: <http://www.matrixscience.com/>

# MASCOT SCIENCE Mascot Search Results

## Peptide View

MS/MS Fragmentation of **IFFESVYGQCK**

Found in **FETUB\_HUMAN**, Fetuin-B OS=Homo sapiens GN=FETUB PE=1 SV=2

Match to Query 33451: 1687.821308 from(844.917930,2+) rtinseconds(2340) index(62390)

Title: Locus:1.1.1.1726.12 File:"2013-07-02 CLN FXIII 180 min 3rd FT.wiff"

Data file C:\Program Files (x86)\Matrix Science\Mascot Daemon\mgf9 FXIII 180 min 3rd\mascot\_daemon\_merge.mgf

Click mouse within plot area to zoom in by factor of two about that point

Or, Plot from  to  Da

Label all possible matches  Label matches used for scoring

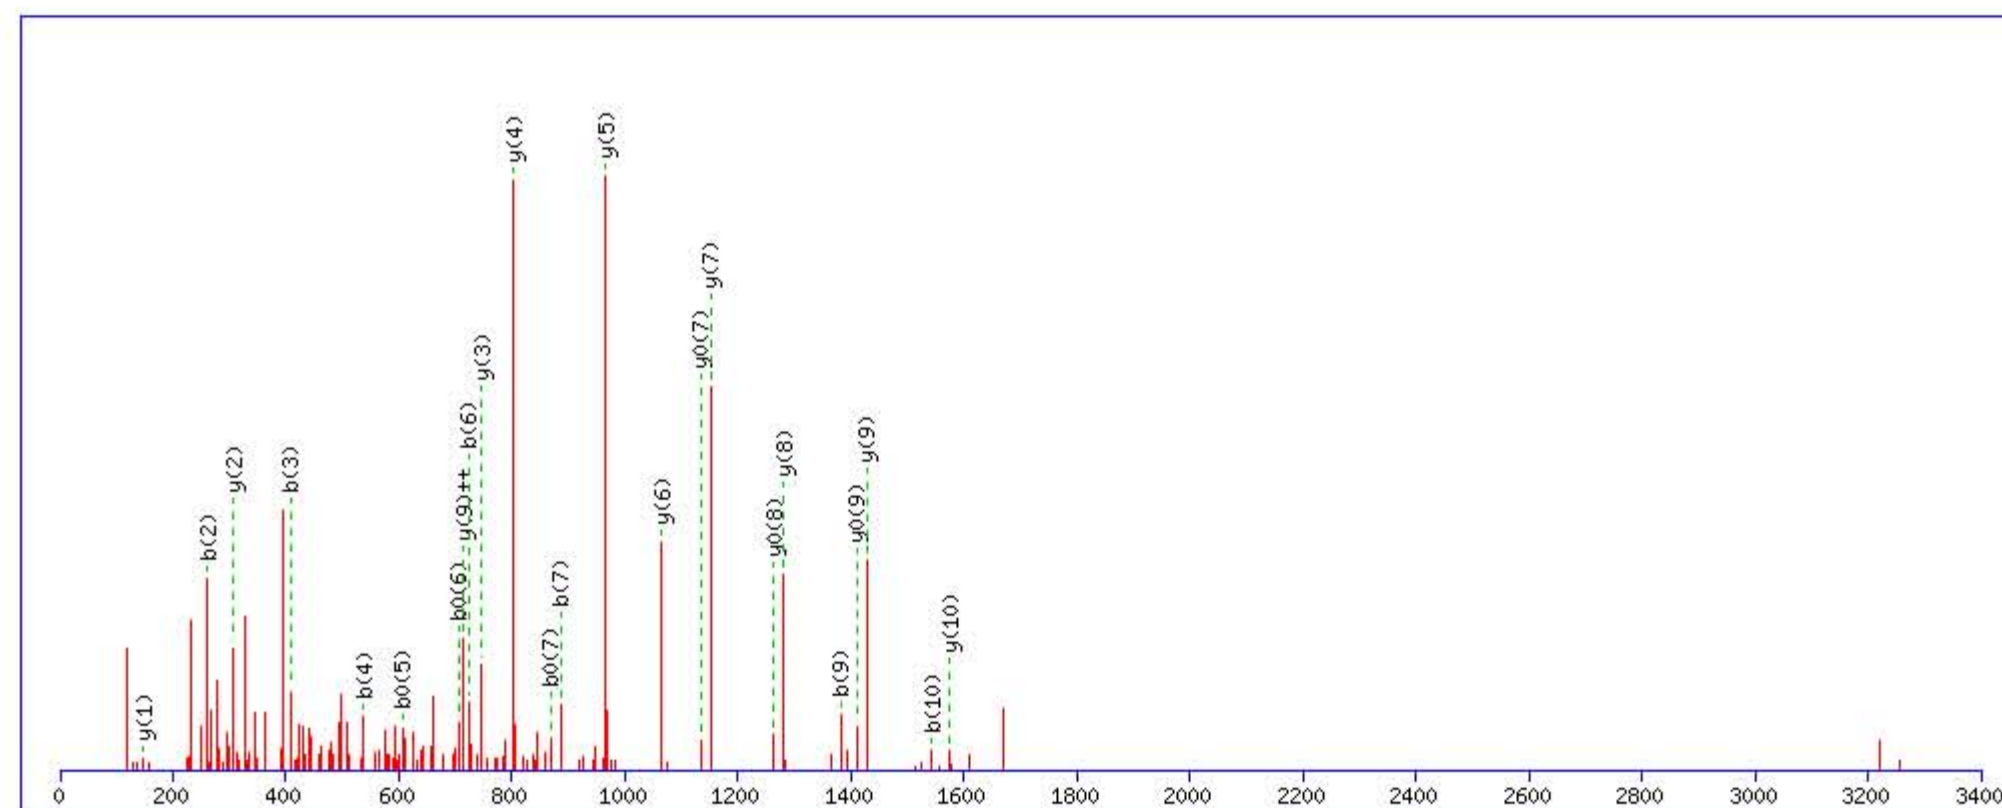

Monoisotopic mass of neutral peptide  $M_r(\text{calc})$ : 1687.810226

Fixed modifications: Carbamidomethyl (C) (apply to specified residues or termini only)

Variable modifications:

Q9 : Biotin:Thermo-21345 (Q)

Ions Score: 61 Expect: 6.3e-006

Matches : 24/86 fragment ions using 44 most intense peaks [\(help\)](#)

| #  | b           | b <sup>++</sup> | b <sup>+</sup> | b <sup>*++</sup> | b <sup>0</sup> | b <sup>0++</sup> | Seq. | y           | y <sup>++</sup> | y <sup>+</sup> | y <sup>*++</sup> | y <sup>0</sup> | y <sup>0++</sup> | #  |
|----|-------------|-----------------|----------------|------------------|----------------|------------------|------|-------------|-----------------|----------------|------------------|----------------|------------------|----|
| 1  | 114.091340  | 57.549308       |                |                  |                |                  | I    |             |                 |                |                  |                |                  | 11 |
| 2  | 261.159754  | 131.083515      |                |                  |                |                  | F    | 1575.733435 | 788.370356      | 1558.706886    | 779.857081       | 1557.722870    | 779.365073       | 10 |
| 3  | 408.228168  | 204.617722      |                |                  |                |                  | F    | 1428.665021 | 714.836149      | 1411.638472    | 706.322874       | 1410.654456    | 705.830866       | 9  |
| 4  | 537.270761  | 269.139019      |                |                  | 519.260196     | 260.133736       | E    | 1281.596607 | 641.301942      | 1264.570058    | 632.788667       | 1263.586042    | 632.296659       | 8  |
| 5  | 624.302789  | 312.655033      |                |                  | 606.292224     | 303.649750       | S    | 1152.554014 | 576.780645      | 1135.527465    | 568.267371       | 1134.543449    | 567.775363       | 7  |
| 6  | 723.371203  | 362.189239      |                |                  | 705.360638     | 353.183957       | V    | 1065.521986 | 533.264631      | 1048.495437    | 524.751357       |                |                  | 6  |
| 7  | 886.434532  | 443.720904      |                |                  | 868.423967     | 434.715622       | Y    | 966.453572  | 483.730424      | 949.427023     | 475.217150       |                |                  | 5  |
| 8  | 943.455996  | 472.231636      |                |                  | 925.445431     | 463.226354       | G    | 803.390243  | 402.198760      | 786.363694     | 393.685485       |                |                  | 4  |
| 9  | 1382.681322 | 691.844299      | 1365.654773    | 683.331025       | 1364.670757    | 682.839017       | Q    | 746.368779  | 373.688028      | 729.342230     | 365.174753       |                |                  | 3  |
| 10 | 1542.711971 | 771.859624      | 1525.685422    | 763.346349       | 1524.701406    | 762.854341       | C    | 307.143453  | 154.075365      | 290.116904     | 145.562090       |                |                  | 2  |
| 11 |             |                 |                |                  |                |                  | K    | 147.112804  | 74.060040       | 130.086255     | 65.546765        |                |                  | 1  |

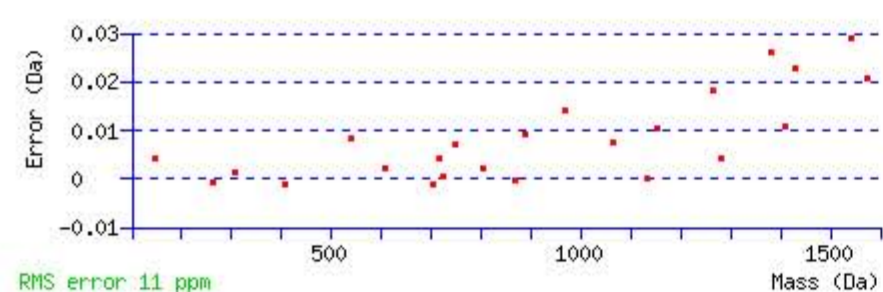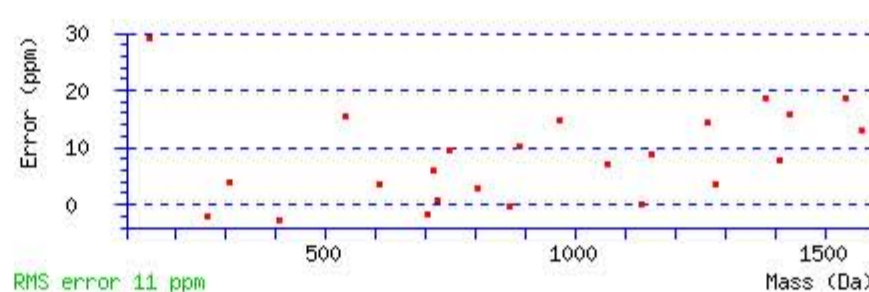

NCBI BLAST search of **IFFESVYGQCK**

(Parameters: blastp, nr protein database, expect=20000, no filter, PAM30)

Other BLAST [web gateways](#)

All matches to this query

| Score | $M_r(\text{calc})$ : | Delta     | Sequence                        |
|-------|----------------------|-----------|---------------------------------|
| 61.0  | 1687.810226          | 0.011082  | <a href="#">IFFESVYGQCK</a>     |
| 5.5   | 1687.831345          | -0.010037 | <a href="#">MIFSSPACLTASFLK</a> |

# MASCOT Search Results

## Peptide View

MS/MS Fragmentation of **IYMTCPDCPSSIPTDSSNHQVLEAATESLAK**  
 Found in **FETUB\_HUMAN**, Fetuin-B OS=Homo sapiens GN=FETUB PE=1 SV=2

Match to Query 61081: 3732.757482 from(1245.259770,3+) rtinseconds(2329) index(62341)  
 Title: Locus:1.1.1.1722.11 File:"2013-07-02 CLN FXIII 180 min 3rd FT.wiff"  
 Data file C:\Program Files (x86)\Matrix Science\Mascot Daemon\mgf9 FXIII 180 min 3rd\mascot\_daemon\_merge.mgf

Click mouse within plot area to zoom in by factor of two about that point

Or, Plot from  to  Da

Label all possible matches  Label matches used for scoring

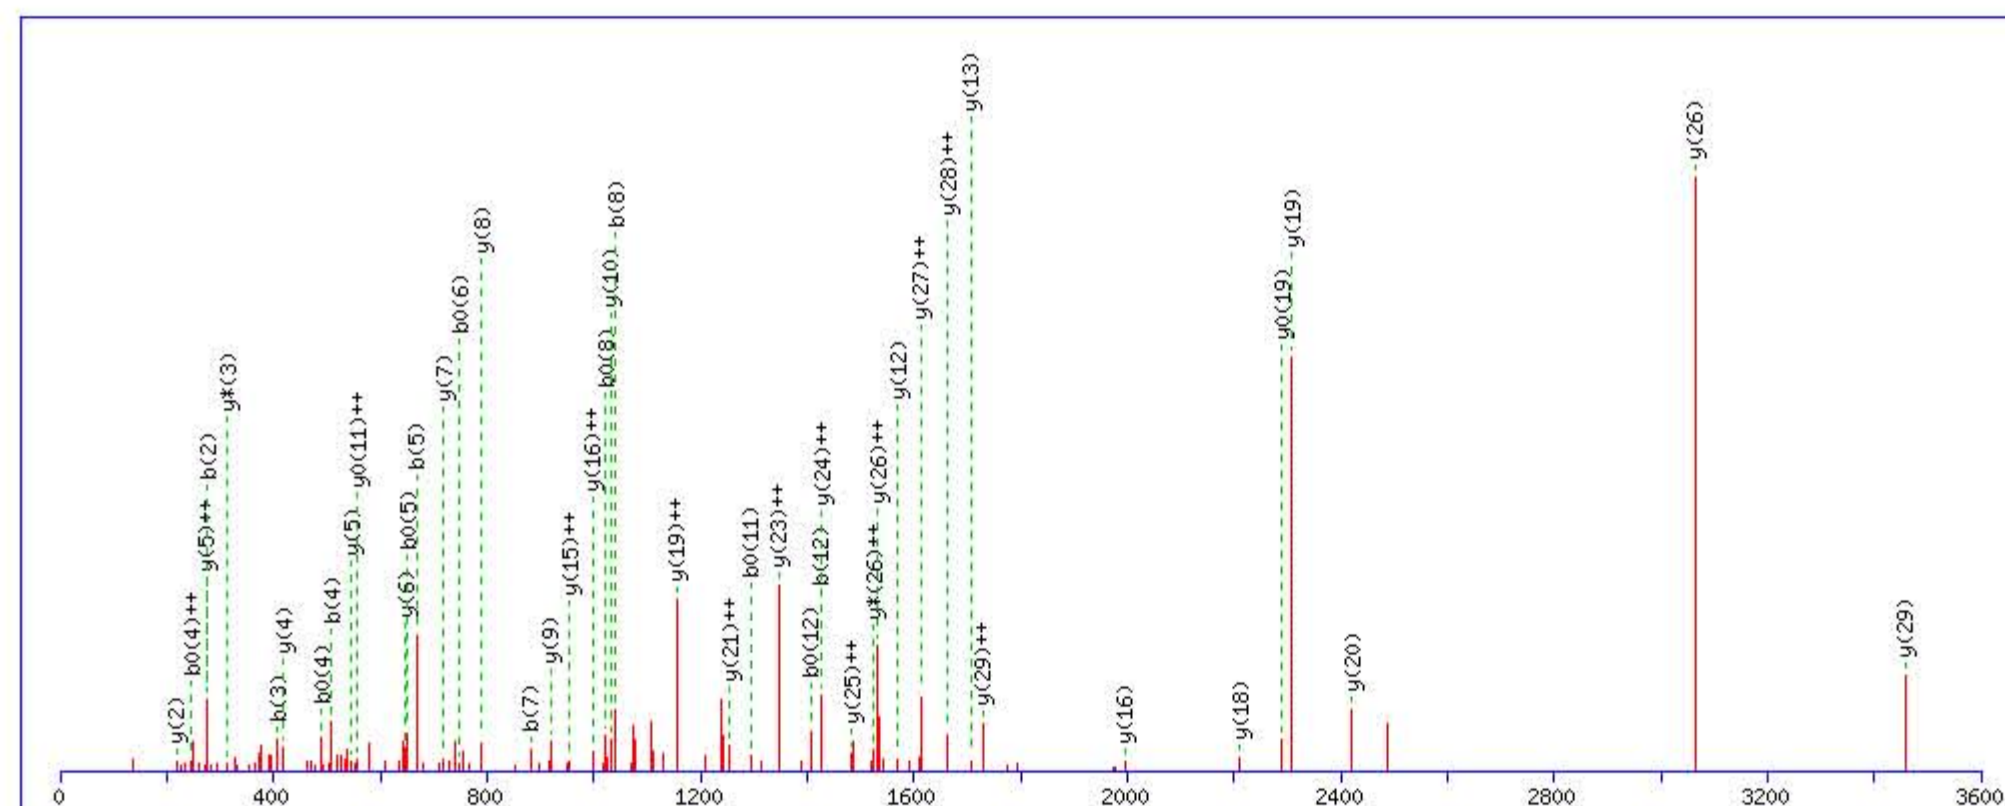

Monoisotopic mass of neutral peptide Mr(calc): 3732.714340  
 Fixed modifications: Carbamidomethyl (C) (apply to specified residues or termini only)  
 Variable modifications:  
 Q20 : Biotin:Thermo-21345 (Q)  
 Ions Score: 62 Expect: 1.2e-005  
 Matches : 46/314 fragment ions using 128 most intense peaks [\(help\)](#)

| #  | b                  | b <sup>++</sup> | b <sup>*</sup> | b <sup>*++</sup> | b <sup>0</sup>     | b <sup>0++</sup> | Seq. | y                  | y <sup>++</sup>    | y <sup>*</sup>    | y <sup>*++</sup>   | y <sup>0</sup>     | y <sup>0++</sup>  | #  |
|----|--------------------|-----------------|----------------|------------------|--------------------|------------------|------|--------------------|--------------------|-------------------|--------------------|--------------------|-------------------|----|
| 1  | 114.091340         | 57.549308       |                |                  |                    |                  | I    |                    |                    |                   |                    |                    |                   | 31 |
| 2  | <b>277.154669</b>  | 139.080973      |                |                  |                    |                  | Y    | 3620.637570        | 1810.822423        | 3603.611021       | 1802.309149        | 3602.627005        | 1801.817141       | 30 |
| 3  | <b>408.195154</b>  | 204.601215      |                |                  |                    |                  | M    | <b>3457.574241</b> | <b>1729.290759</b> | 3440.547692       | 1720.777484        | 3439.563676        | 1720.285476       | 29 |
| 4  | <b>509.242833</b>  | 255.125055      |                |                  | 491.232268         | 246.119772       | T    | 3326.533756        | <b>1663.770516</b> | 3309.507207       | 1655.257242        | 3308.523191        | 1654.765234       | 28 |
| 5  | <b>669.273482</b>  | 335.140379      |                |                  | 651.262917         | 326.135097       | C    | 3225.486077        | <b>1613.246677</b> | 3208.459528       | 1604.733402        | 3207.475512        | 1604.241394       | 27 |
| 6  | 766.326246         | 383.666761      |                |                  | <b>748.315681</b>  | 374.661479       | P    | <b>3065.455428</b> | <b>1533.231352</b> | 3048.428879       | <b>1524.718078</b> | 3047.444863        | 1524.226070       | 26 |
| 7  | <b>881.353189</b>  | 441.180233      |                |                  | 863.342624         | 432.174950       | D    | 2968.402664        | <b>1484.704970</b> | 2951.376115       | 1476.191696        | 2950.392099        | 1475.699688       | 25 |
| 8  | <b>1041.383838</b> | 521.195557      |                |                  | <b>1023.373273</b> | 512.190274       | C    | 2853.375721        | <b>1427.191499</b> | 2836.349172       | 1418.678224        | 2835.365156        | 1418.186216       | 24 |
| 9  | 1138.436602        | 569.721939      |                |                  | 1120.426037        | 560.716657       | P    | 2693.345072        | <b>1347.176174</b> | 2676.318523       | 1338.662900        | 2675.334507        | 1338.170892       | 23 |
| 10 | 1225.468630        | 613.237953      |                |                  | 1207.458065        | 604.232671       | S    | 2596.292308        | 1298.649792        | 2579.265759       | 1290.136518        | 2578.281743        | 1289.644510       | 22 |
| 11 | 1312.500658        | 656.753967      |                |                  | <b>1294.490093</b> | 647.748685       | S    | 2509.260280        | <b>1255.133778</b> | 2492.233731       | 1246.620504        | 2491.249715        | 1246.128496       | 21 |
| 12 | <b>1425.584722</b> | 713.295999      |                |                  | <b>1407.574157</b> | 704.290717       | I    | <b>2422.228252</b> | 1211.617764        | 2405.201703       | 1203.104490        | 2404.217687        | 1202.612482       | 20 |
| 13 | 1522.637486        | 761.822381      |                |                  | 1504.626921        | 752.817099       | P    | <b>2309.144188</b> | <b>1155.075732</b> | 2292.117639       | 1146.562458        | <b>2291.133623</b> | 1146.070450       | 19 |
| 14 | 1623.685165        | 812.346221      |                |                  | 1605.674600        | 803.340938       | T    | <b>2212.091424</b> | 1106.549350        | 2195.064875       | 1098.036076        | 2194.080859        | 1097.544068       | 18 |
| 15 | 1738.712108        | 869.859692      |                |                  | 1720.701543        | 860.854410       | D    | 2111.043745        | 1056.025511        | 2094.017196       | 1047.512236        | 2093.033180        | 1047.020228       | 17 |
| 16 | 1825.744136        | 913.375706      |                |                  | 1807.733571        | 904.370424       | S    | <b>1996.016802</b> | <b>998.512039</b>  | 1978.990253       | 989.998765         | 1978.006237        | 989.506757        | 16 |
| 17 | 1912.776164        | 956.891720      |                |                  | 1894.765599        | 947.886438       | S    | 1908.984774        | <b>954.996025</b>  | 1891.958225       | 946.482751         | 1890.974209        | 945.990743        | 15 |
| 18 | 2026.819091        | 1013.913184     | 2009.792542    | 1005.399909      | 2008.808526        | 1004.907901      | N    | 1821.952746        | 911.480011         | 1804.926197       | 902.966737         | 1803.942181        | 902.474729        | 14 |
| 19 | 2163.878003        | 1082.442640     | 2146.851454    | 1073.929365      | 2145.867438        | 1073.437357      | H    | <b>1707.909819</b> | 854.458548         | 1690.883270       | 845.945273         | 1689.899254        | 845.453265        | 13 |
| 20 | 2603.103329        | 1302.055303     | 2586.076780    | 1293.542028      | 2585.092764        | 1293.050020      | Q    | <b>1570.850907</b> | 785.929092         | 1553.824358       | 777.415817         | 1552.840342        | 776.923809        | 12 |
| 21 | 2702.171743        | 1351.589510     | 2685.145194    | 1343.076235      | 2684.161178        | 1342.584227      | V    | 1131.625581        | 566.316429         | 1114.599032       | 557.803154         | 1113.615016        | <b>557.311146</b> | 11 |
| 22 | 2815.255807        | 1408.131542     | 2798.229258    | 1399.618267      | 2797.245242        | 1399.126259      | L    | <b>1032.557167</b> | 516.782222         | 1015.530618       | 508.268947         | 1014.546602        | 507.776939        | 10 |
| 23 | 2944.298400        | 1472.652838     | 2927.271851    | 1464.139564      | 2926.287835        | 1463.647556      | E    | <b>919.473103</b>  | 460.240190         | 902.446554        | 451.726915         | 901.462538         | 451.234907        | 9  |
| 24 | 3015.335514        | 1508.171395     | 2998.308965    | 1499.658121      | 2997.324949        | 1499.166113      | A    | <b>790.430510</b>  | 395.718893         | 773.403961        | 387.205619         | 772.419945         | 386.713611        | 8  |
| 25 | 3086.372628        | 1543.689952     | 3069.346079    | 1535.176678      | 3068.362063        | 1534.684670      | A    | <b>719.393396</b>  | 360.200336         | 702.366847        | 351.687062         | 701.382831         | 351.195054        | 7  |
| 26 | 3187.420307        | 1594.213792     | 3170.393758    | 1585.700517      | 3169.409742        | 1585.208509      | T    | <b>648.356282</b>  | 324.681779         | 631.329733        | 316.168505         | 630.345717         | 315.676497        | 6  |
| 27 | 3316.462900        | 1658.735088     | 3299.436351    | 1650.221814      | 3298.452335        | 1649.729806      | E    | <b>547.308603</b>  | <b>274.157940</b>  | 530.282054        | 265.644665         | 529.298038         | 265.152657        | 5  |
| 28 | 3403.494928        | 1702.251102     | 3386.468379    | 1693.737828      | 3385.484363        | 1693.245820      | S    | <b>418.266010</b>  | 209.636643         | 401.239461        | 201.123369         | 400.255445         | 200.631361        | 4  |
| 29 | 3516.578992        | 1758.793134     | 3499.552443    | 1750.279860      | 3498.568427        | 1749.787852      | L    | 331.233982         | 166.120629         | <b>314.207433</b> | 157.607355         |                    |                   | 3  |
| 30 | 3587.616106        | 1794.311691     | 3570.589557    | 1785.798417      | 3569.605541        | 1785.306409      | A    | <b>218.149918</b>  | 109.578597         | 201.123369        | 101.065323         |                    |                   | 2  |
| 31 |                    |                 |                |                  |                    |                  | K    | 147.112804         | 74.060040          | 130.086255        | 65.546765          |                    |                   | 1  |

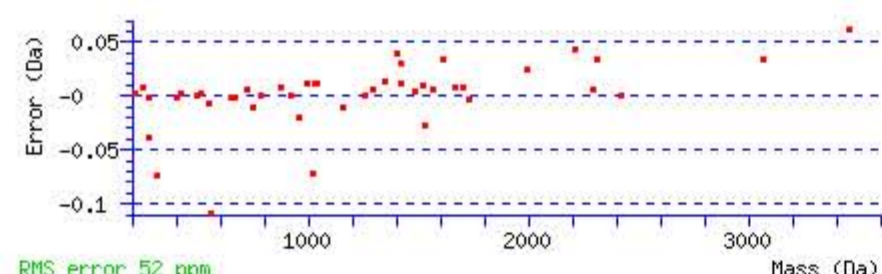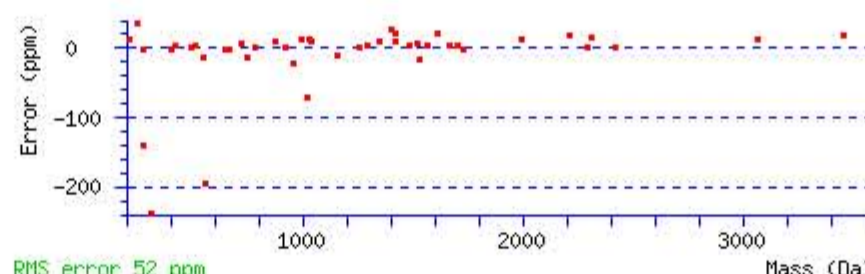

NCBI BLAST search of **IYMTCPDCPSSIPTDSSNHQVLEAATESLAK**  
 (Parameters: blastp, nr protein database, expect=20000, no filter, PAM30)  
 Other BLAST [web gateways](#)

## All matches to this query

| Score | Mr(calc):   | Delta    | Sequence                                        |
|-------|-------------|----------|-------------------------------------------------|
| 61.8  | 3732.714340 | 0.043142 | <a href="#">IYMTCPDCPSSIPTDSSNHQVLEAATESLAK</a> |

Mascot: <http://www.matrixscience.com/>



# MASCOT SEARCH RESULTS

## Peptide View

MS/MS Fragmentation of **QLEQVIK**

Found in **FIBA\_HUMAN**, Fibrinogen alpha chain OS=Homo sapiens GN=FGA PE=1 SV=2

Match to Query 18647: 1238.703848 from(620.359200,2+) rtinseconds(1818) index(44868)

Title: Locus:1.1.1.3346.7 File:"2013-07-02 CLN FXIII 180 min 3rd F 4.wiff"

Data file C:\Program Files (x86)\Matrix Science\Mascot Daemon\mgf9 FXIII 180 min 3rd\mascot\_daemon\_merge.mgf

Click mouse within plot area to zoom in by factor of two about that point

Or, Plot from  to  Da

Label all possible matches  Label matches used for scoring

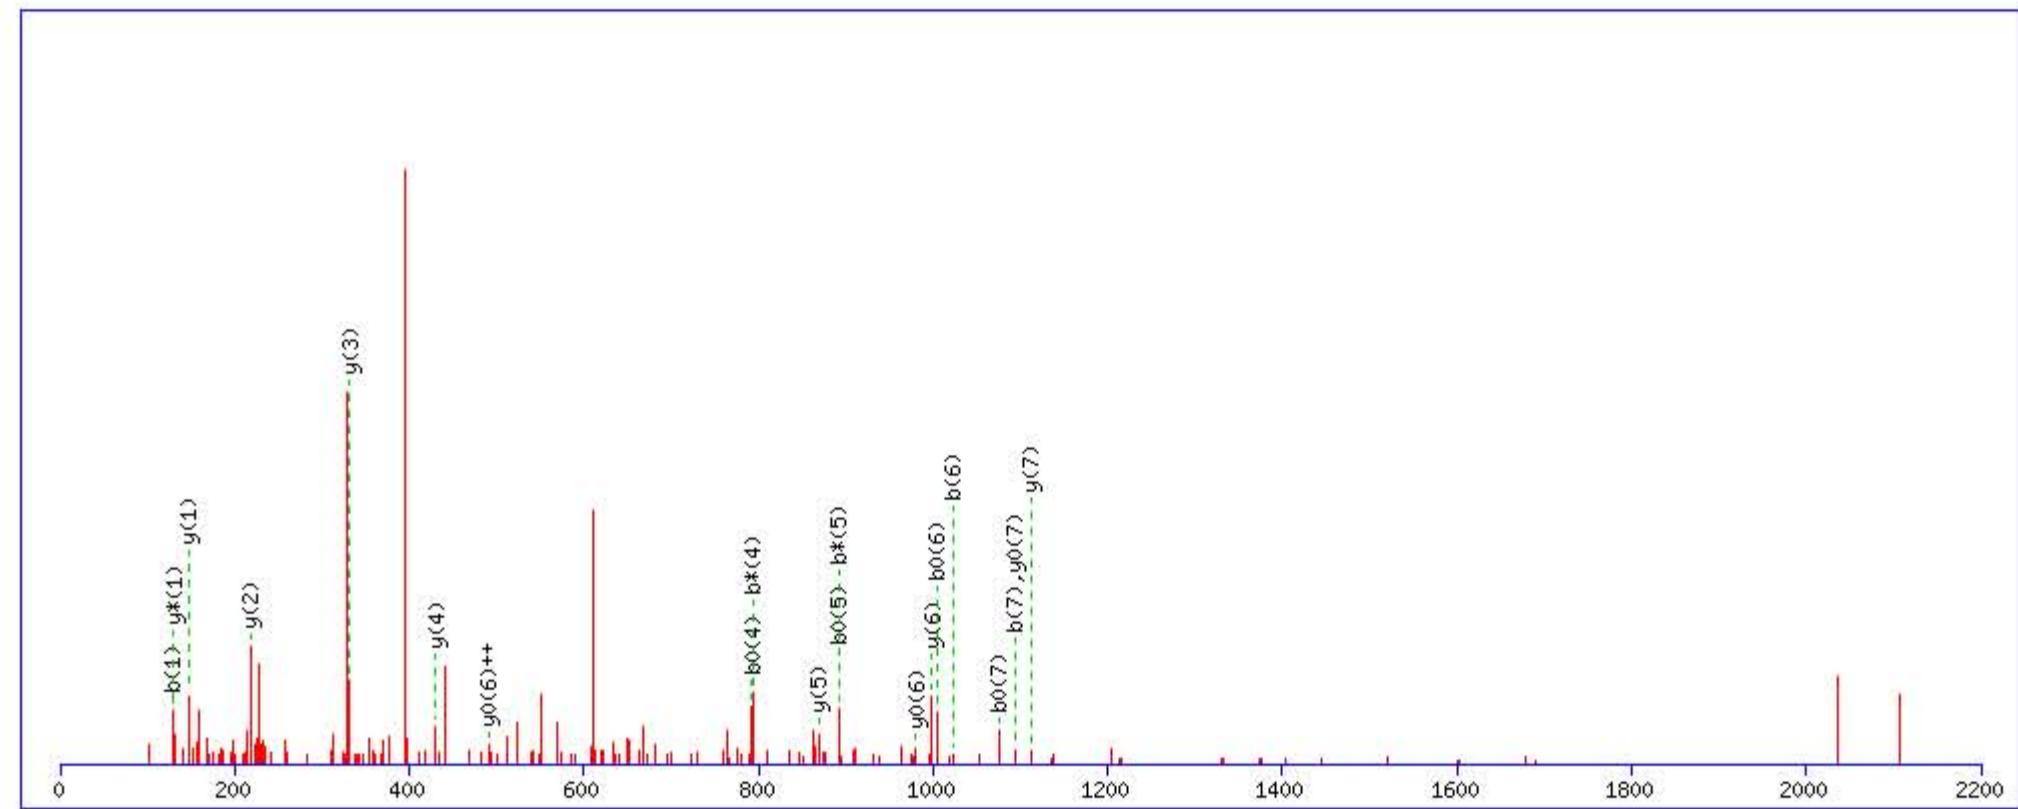

Monoisotopic mass of neutral peptide Mr(calc): 1238.705658

Fixed modifications: Carbamidomethyl (C) (apply to specified residues or termini only)

Variable modifications:

Q4 : Biotin:Thermo-21345 (Q)

Ions Score: 31 Expect: 0.013

Matches : 20/70 fragment ions using 48 most intense peaks [\(help\)](#)

| # | b           | b <sup>++</sup> | b <sup>*</sup> | b <sup>*++</sup> | b <sup>0</sup> | b <sup>0++</sup> | Seq. | y           | y <sup>++</sup> | y <sup>*</sup> | y <sup>*++</sup> | y <sup>0</sup> | y <sup>0++</sup> | # |
|---|-------------|-----------------|----------------|------------------|----------------|------------------|------|-------------|-----------------|----------------|------------------|----------------|------------------|---|
| 1 | 129.065854  | 65.036565       | 112.039305     | 56.523291        |                |                  | Q    |             |                 |                |                  |                |                  | 8 |
| 2 | 242.149918  | 121.578597      | 225.123369     | 113.065323       |                |                  | L    | 1111.654379 | 556.330828      | 1094.627830    | 547.817553       | 1093.643814    | 547.325545       | 7 |
| 3 | 371.192511  | 186.099894      | 354.165962     | 177.586619       | 353.181946     | 177.094611       | E    | 998.570315  | 499.788796      | 981.543766     | 491.275521       | 980.559750     | 490.783513       | 6 |
| 4 | 810.417837  | 405.712557      | 793.391288     | 397.199282       | 792.407272     | 396.707274       | Q    | 869.527722  | 435.267499      | 852.501173     | 426.754225       |                |                  | 5 |
| 5 | 909.486251  | 455.246764      | 892.459702     | 446.733489       | 891.475686     | 446.241481       | V    | 430.302396  | 215.654836      | 413.275847     | 207.141562       |                |                  | 4 |
| 6 | 1022.570315 | 511.788796      | 1005.543766    | 503.275521       | 1004.559750    | 502.783513       | I    | 331.233982  | 166.120629      | 314.207433     | 157.607355       |                |                  | 3 |
| 7 | 1093.607429 | 547.307353      | 1076.580880    | 538.794078       | 1075.596864    | 538.302070       | A    | 218.149918  | 109.578597      | 201.123369     | 101.065323       |                |                  | 2 |
| 8 |             |                 |                |                  |                |                  | K    | 147.112804  | 74.060040       | 130.086255     | 65.546765        |                |                  | 1 |

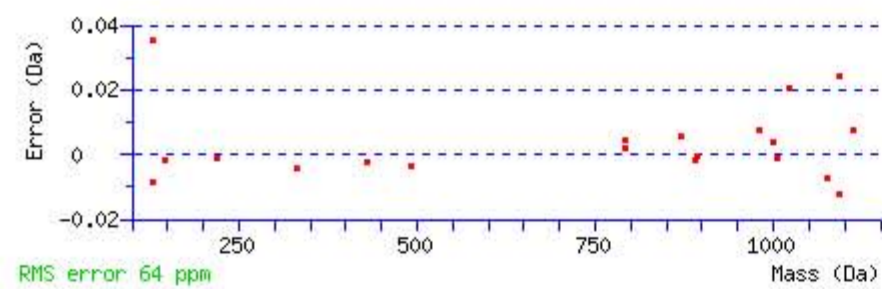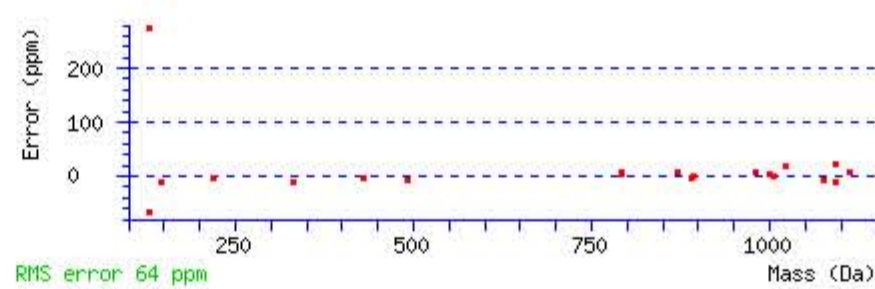

NCBI BLAST search of **QLEQVIK**

(Parameters: blastp, nr protein database, expect=20000, no filter, PAM30)

Other BLAST [web gateways](#)

All matches to this query

| Score | Mr(calc):   | Delta     | Sequence                     |
|-------|-------------|-----------|------------------------------|
| 30.9  | 1238.705658 | -0.001810 | <a href="#">QLEQVIK</a>      |
| 10.6  | 1238.687027 | 0.016821  | <a href="#">KEETQPPVALK</a>  |
| 10.5  | 1238.705658 | -0.001810 | <a href="#">QLEQVIK</a>      |
| 6.1   | 1238.698273 | 0.005575  | <a href="#">GHVTQLKESLK</a>  |
| 6.1   | 1238.698257 | 0.005591  | <a href="#">IHADASSKVLAK</a> |
| 5.7   | 1238.716904 | -0.013056 | <a href="#">DRVQVAIK</a>     |
| 4.8   | 1238.702301 | 0.001547  | <a href="#">DVFKKGFSLAK</a>  |
| 3.4   | 1238.705658 | -0.001810 | <a href="#">QIAQEIVK</a>     |
| 1.8   | 1238.691040 | 0.012808  | <a href="#">LYKEFIDLAK</a>   |
| 1.7   | 1238.716888 | -0.013040 | <a href="#">KRILCPLDPK</a>   |

# MASCOT Search Results

## Peptide View

MS/MS Fragmentation of **NSLFEYQK**

Found in **FIBA\_HUMAN**, Fibrinogen alpha chain OS=Homo sapiens GN=FGA PE=1 SV=2

Match to Query 21083: 1338.664988 from(670.339770,2+) rtinseconds(2075) index(19449)

Title: Locus:1.1.1.3288.9 File:"2013-07-02 CLN FXIII 180 min 3rd F 2.wiff"

Data file C:\Program Files (x86)\Matrix Science\Mascot Daemon\mgf9 FXIII 180 min 3rd\mascot\_daemon\_merge.mgf

Click mouse within plot area to zoom in by factor of two about that point

Or, Plot from  to  Da

Label all possible matches  Label matches used for scoring

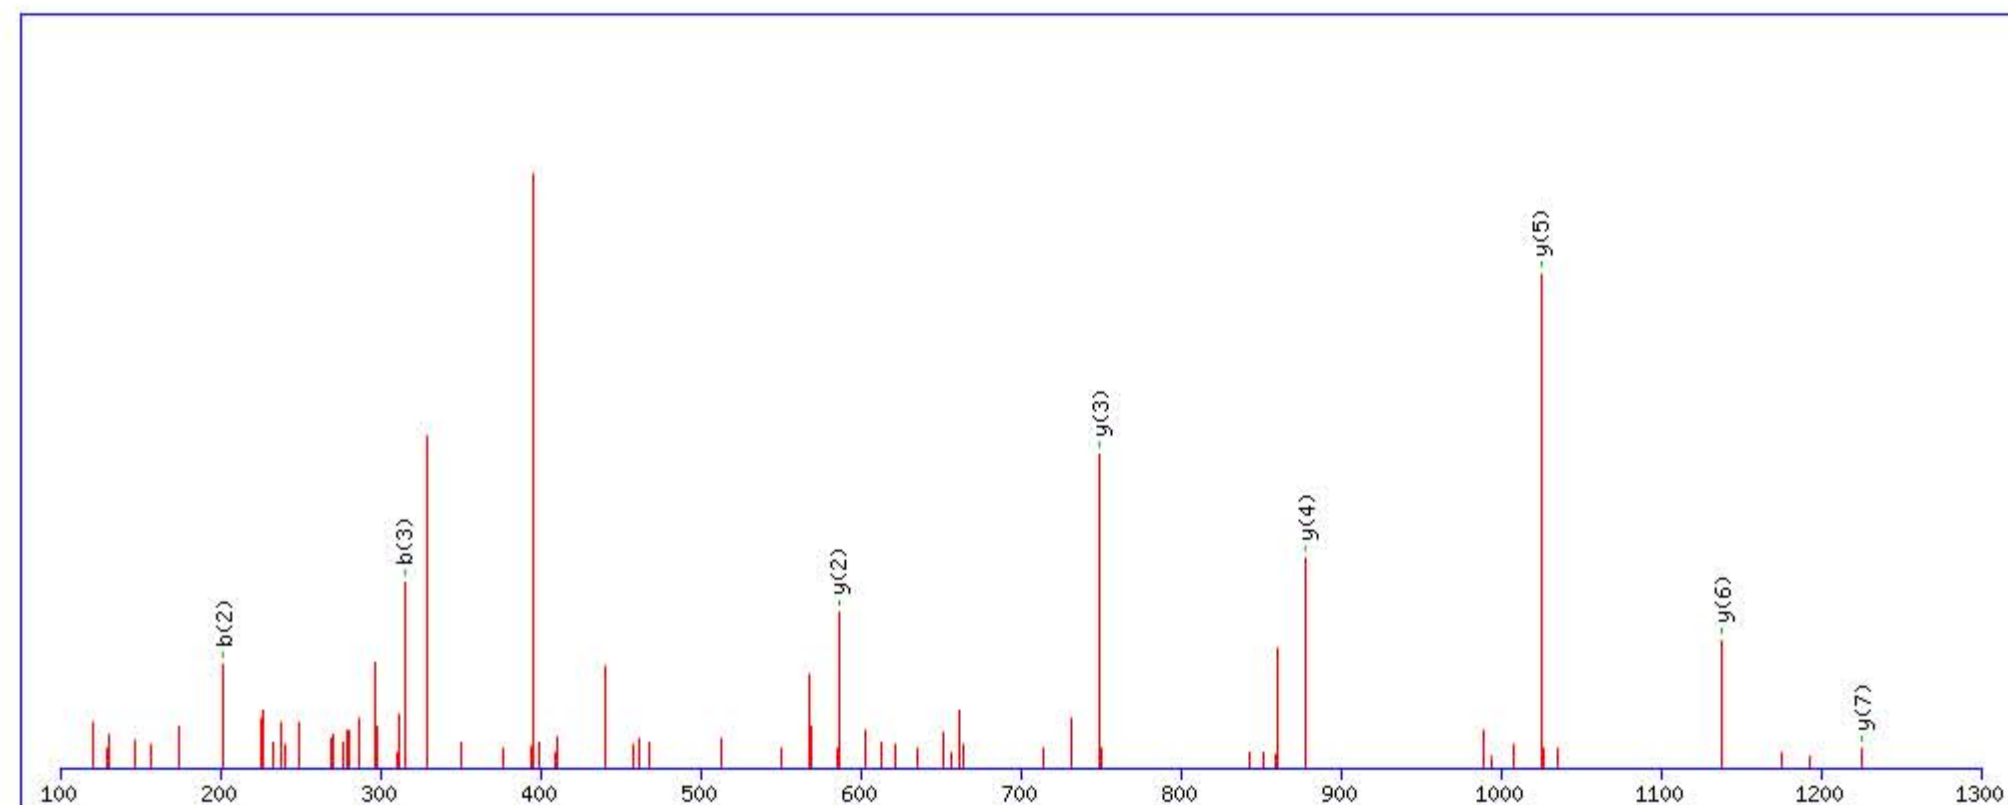

Monoisotopic mass of neutral peptide Mr(calc): 1338.664185

Fixed modifications: Carbamidomethyl (C) (apply to specified residues or termini only)

Variable modifications:

Q7 : Biotin:Thermo-21345 (Q)

Ions Score: 46 Expect: 0.00046

Matches : 8/76 fragment ions using 12 most intense peaks ([help](#))

| # | b                 | b <sup>++</sup> | b <sup>*</sup> | b <sup>*++</sup> | b <sup>0</sup> | b <sup>0++</sup> | Seq. | y                  | y <sup>++</sup> | y <sup>*</sup> | y <sup>*++</sup> | y <sup>0</sup> | y <sup>0++</sup> | # |
|---|-------------------|-----------------|----------------|------------------|----------------|------------------|------|--------------------|-----------------|----------------|------------------|----------------|------------------|---|
| 1 | 115.050203        | 58.028740       | 98.023654      | 49.515465        |                |                  | N    |                    |                 |                |                  |                |                  | 8 |
| 2 | <b>202.082231</b> | 101.544753      | 185.055682     | 93.031479        | 184.071666     | 92.539471        | S    | <b>1225.628558</b> | 613.317917      | 1208.602009    | 604.804643       | 1207.617993    | 604.312635       | 7 |
| 3 | <b>315.166295</b> | 158.086785      | 298.139746     | 149.573511       | 297.155730     | 149.081503       | L    | <b>1138.596530</b> | 569.801903      | 1121.569981    | 561.288629       | 1120.585965    | 560.796621       | 6 |
| 4 | 462.234709        | 231.620993      | 445.208160     | 223.107718       | 444.224144     | 222.615710       | F    | <b>1025.512466</b> | 513.259871      | 1008.485917    | 504.746597       | 1007.501901    | 504.254589       | 5 |
| 5 | 591.277302        | 296.142289      | 574.250753     | 287.629015       | 573.266737     | 287.137007       | E    | <b>878.444052</b>  | 439.725664      | 861.417503     | 431.212390       | 860.433487     | 430.720382       | 4 |
| 6 | 754.340631        | 377.673954      | 737.314082     | 369.160679       | 736.330066     | 368.668671       | Y    | <b>749.401459</b>  | 375.204368      | 732.374910     | 366.691093       |                |                  | 3 |
| 7 | 1193.565957       | 597.286617      | 1176.539408    | 588.773342       | 1175.555392    | 588.281334       | Q    | <b>586.338130</b>  | 293.672703      | 569.311581     | 285.159429       |                |                  | 2 |
| 8 |                   |                 |                |                  |                |                  | K    | 147.112804         | 74.060040       | 130.086255     | 65.546765        |                |                  | 1 |

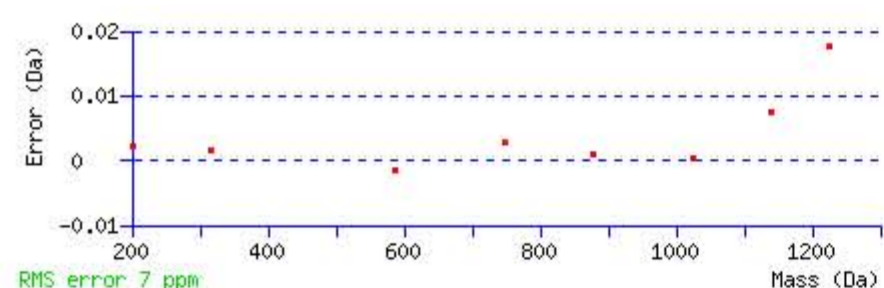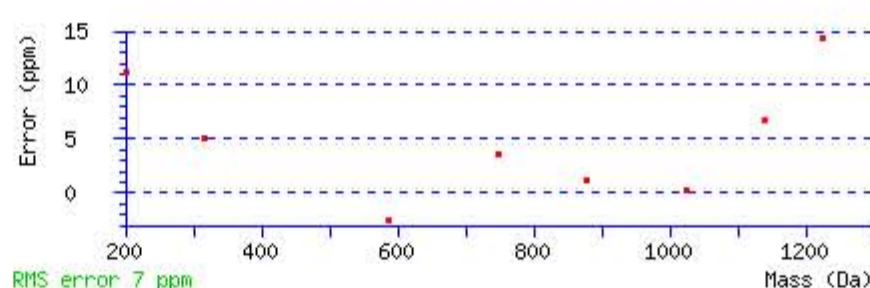

NCBI BLAST search of **NSLFEYQK**

(Parameters: blastp, nr protein database, expect=20000, no filter, PAM30)

Other BLAST [web gateways](#)

All matches to this query

| Score | Mr(calc):   | Delta     | Sequence                      |
|-------|-------------|-----------|-------------------------------|
| 45.6  | 1338.664185 | 0.000803  | <a href="#">NSLFEYQK</a>      |
| 14.8  | 1338.660172 | 0.004816  | <a href="#">NSMFTAGKGVAEK</a> |
| 8.0   | 1338.660172 | 0.004816  | <a href="#">BTVYLQMBSLR</a>   |
| 3.4   | 1338.682632 | -0.017644 | <a href="#">NLSRMQSRFGK</a>   |
| 3.1   | 1338.666672 | -0.001684 | <a href="#">ESIKDLADYASK</a>  |
| 1.9   | 1338.644913 | 0.020075  | <a href="#">NSVMSPSSSKSTK</a> |

Mascot: <http://www.matrixscience.com/>

# MASCOT Search Results

## Peptide View

MS/MS Fragmentation of **ALTDMPQMR**

Found in **FIBA\_HUMAN**, Fibrinogen alpha chain OS=Homo sapiens GN=FGA PE=1 SV=2

Match to Query 23135: 1388.651948 from(695.333250,2+) rtinseconds(1692) index(17044)

Title: Locus:1.1.1.3155.6 File:"2013-07-02 CLN FXIII 180 min 3rd F 2.wiff"

Data file C:\Program Files (x86)\Matrix Science\Mascot Daemon\mgf9 FXIII 180 min 3rd\mascot\_daemon\_merge.mgf

Click mouse within plot area to zoom in by factor of two about that point

Or, Plot from  to  Da

Label all possible matches  Label matches used for scoring

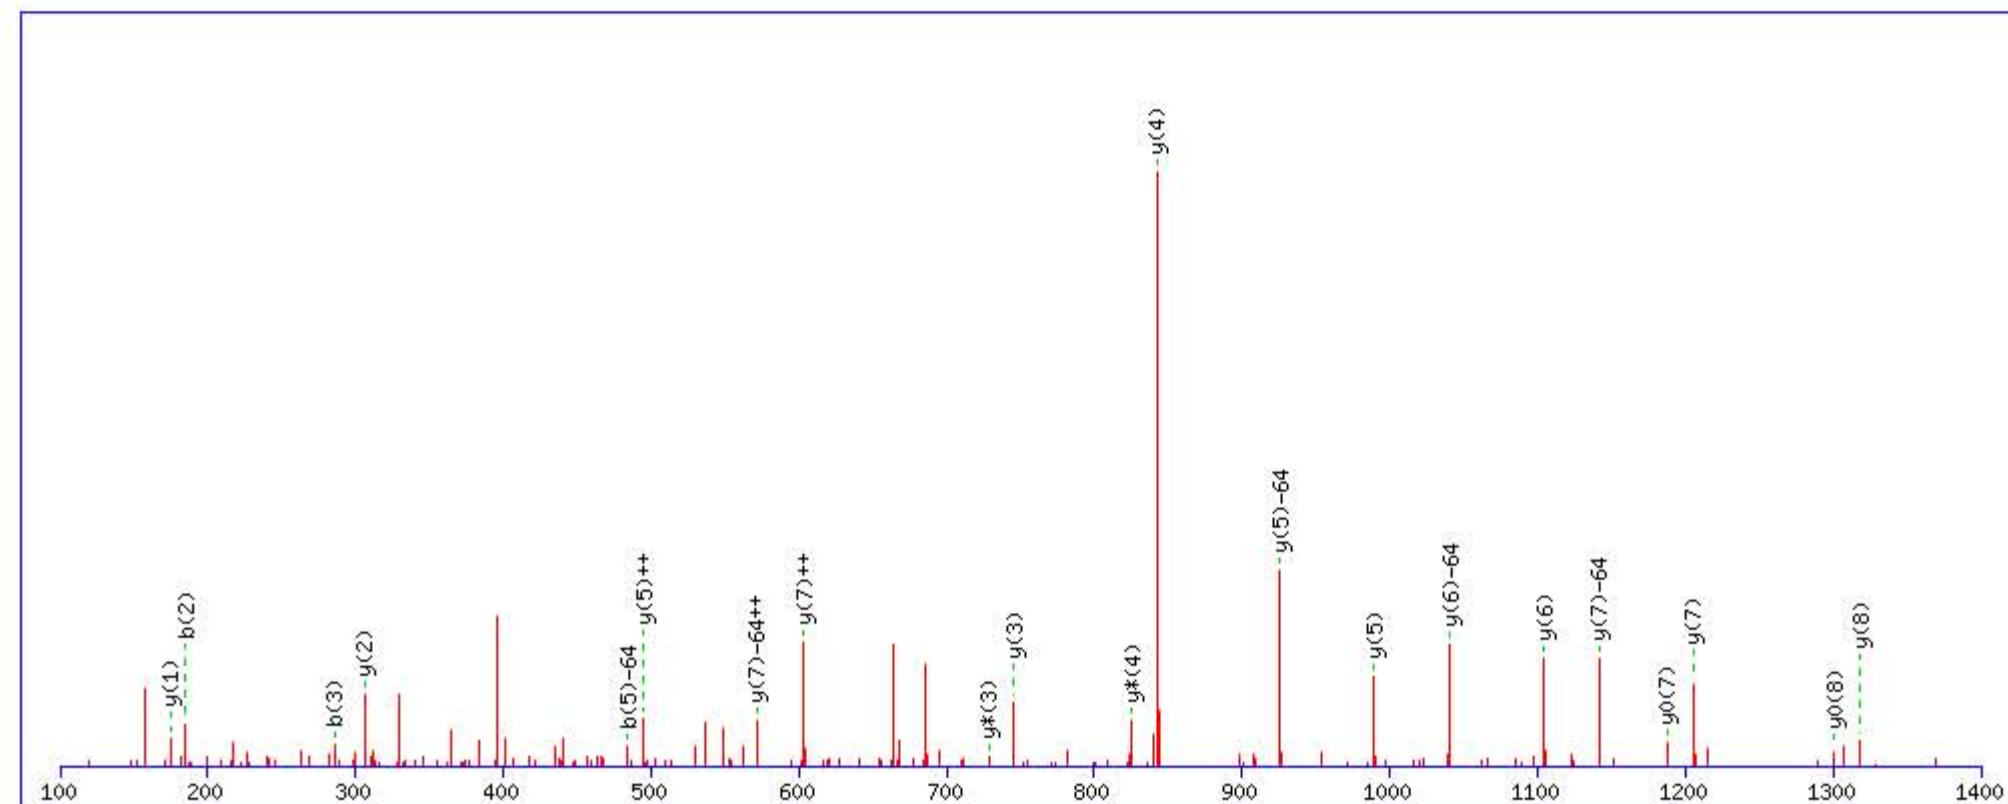

Monoisotopic mass of neutral peptide Mr(calc): 1388.661438

Fixed modifications: Carbamidomethyl (C) (apply to specified residues or termini only)

Variable modifications:

M5 : Oxidation (M), with neutral losses 0.000000 (shown in table), 63.998285

Q7 : Biotin:Thermo-21345 (Q)

Ions Score: 53 Expect: 2.3e-005

Matches : 21/112 fragment ions using 38 most intense peaks [\(help\)](#)

| # | b                 | b <sup>++</sup> | b <sup>*</sup> | b <sup>*++</sup> | b <sup>0</sup> | b <sup>0++</sup> | Seq. | y                  | y <sup>++</sup>   | y <sup>*</sup>    | y <sup>*++</sup> | y <sup>0</sup>     | y <sup>0++</sup> | # |
|---|-------------------|-----------------|----------------|------------------|----------------|------------------|------|--------------------|-------------------|-------------------|------------------|--------------------|------------------|---|
| 1 | 72.044390         | 36.525833       |                |                  |                |                  | A    |                    |                   |                   |                  |                    |                  | 9 |
| 2 | <b>185.128454</b> | 93.067865       |                |                  |                |                  | L    | <b>1318.631613</b> | 659.819445        | 1301.605064       | 651.306170       | <b>1300.621048</b> | 650.814162       | 8 |
| 3 | <b>286.176133</b> | 143.591704      |                |                  | 268.165568     | 134.586422       | T    | <b>1205.547549</b> | <b>603.277413</b> | 1188.521000       | 594.764138       | <b>1187.536984</b> | 594.272130       | 7 |
| 4 | 401.203076        | 201.105176      |                |                  | 383.192511     | 192.099894       | D    | <b>1104.499870</b> | 552.753573        | 1087.473321       | 544.240298       | 1086.489305        | 543.748290       | 6 |
| 5 | 548.238476        | 274.622876      |                |                  | 530.227911     | 265.617594       | M    | <b>989.472927</b>  | <b>495.240102</b> | 972.446378        | 486.726827       |                    |                  | 5 |
| 6 | 645.291240        | 323.149258      |                |                  | 627.280675     | 314.143976       | P    | <b>842.437527</b>  | 421.722402        | <b>825.410978</b> | 413.209127       |                    |                  | 4 |
| 7 | 1084.516566       | 542.761921      | 1067.490017    | 534.248647       | 1066.506001    | 533.756639       | Q    | <b>745.384763</b>  | 373.196020        | <b>728.358214</b> | 364.682745       |                    |                  | 3 |
| 8 | 1215.557051       | 608.282164      | 1198.530502    | 599.768889       | 1197.546486    | 599.276881       | M    | <b>306.159437</b>  | 153.583356        | 289.132888        | 145.070082       |                    |                  | 2 |
| 9 |                   |                 |                |                  |                |                  | R    | <b>175.118952</b>  | 88.063114         | 158.092403        | 79.549839        |                    |                  | 1 |

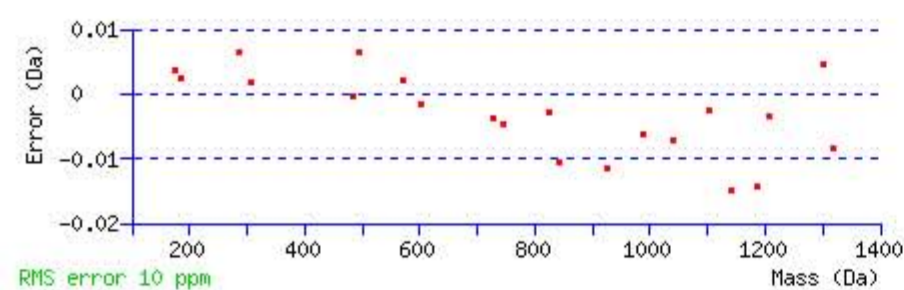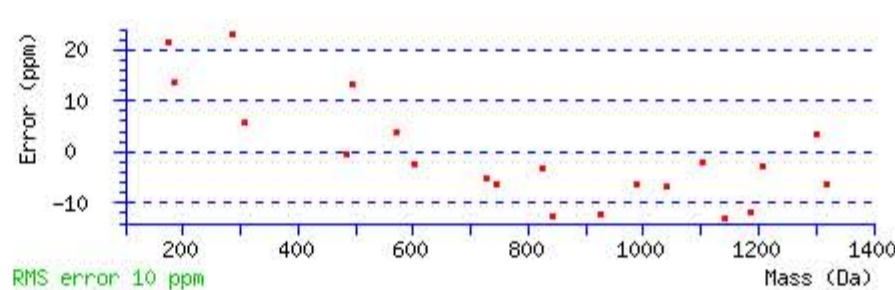

NCBI BLAST search of **ALTDMPQMR**

(Parameters: blastp, nr protein database, expect=20000, no filter, PAM30)

Other BLAST [web gateways](#)

All matches to this query

| Score | Mr(calc):   | Delta     | Sequence                      |
|-------|-------------|-----------|-------------------------------|
| 53.3  | 1388.661438 | -0.009490 | <a href="#">ALTDMPQMR</a>     |
| 18.8  | 1388.661438 | -0.009490 | <a href="#">ALTDMPQMR</a>     |
| 3.8   | 1388.660568 | -0.008620 | <a href="#">SEMTASPLVGPER</a> |

Mascot: <http://www.matrixscience.com/>

# MASCOT Search Results

## Peptide View

MS/MS Fragmentation of **QFTSSTSYNR**

Found in **FIBA\_HUMAN**, Fibrinogen alpha chain OS=Homo sapiens GN=FGA PE=1 SV=2

Match to Query 27122: 1500.695728 from(751.355140,2+) rtinseconds(1615) index(16623)

Title: Locus:1.1.1.3128.8 File:"2013-07-02 CLN FXIII 180 min 3rd F 2.wiff"

Data file C:\Program Files (x86)\Matrix Science\Mascot Daemon\mgf\9 FXIII 180 min 3rd\mascot\_daemon\_merge.mgf

Click mouse within plot area to zoom in by factor of two about that point

Or, Plot from  to  Da

Label all possible matches  Label matches used for scoring

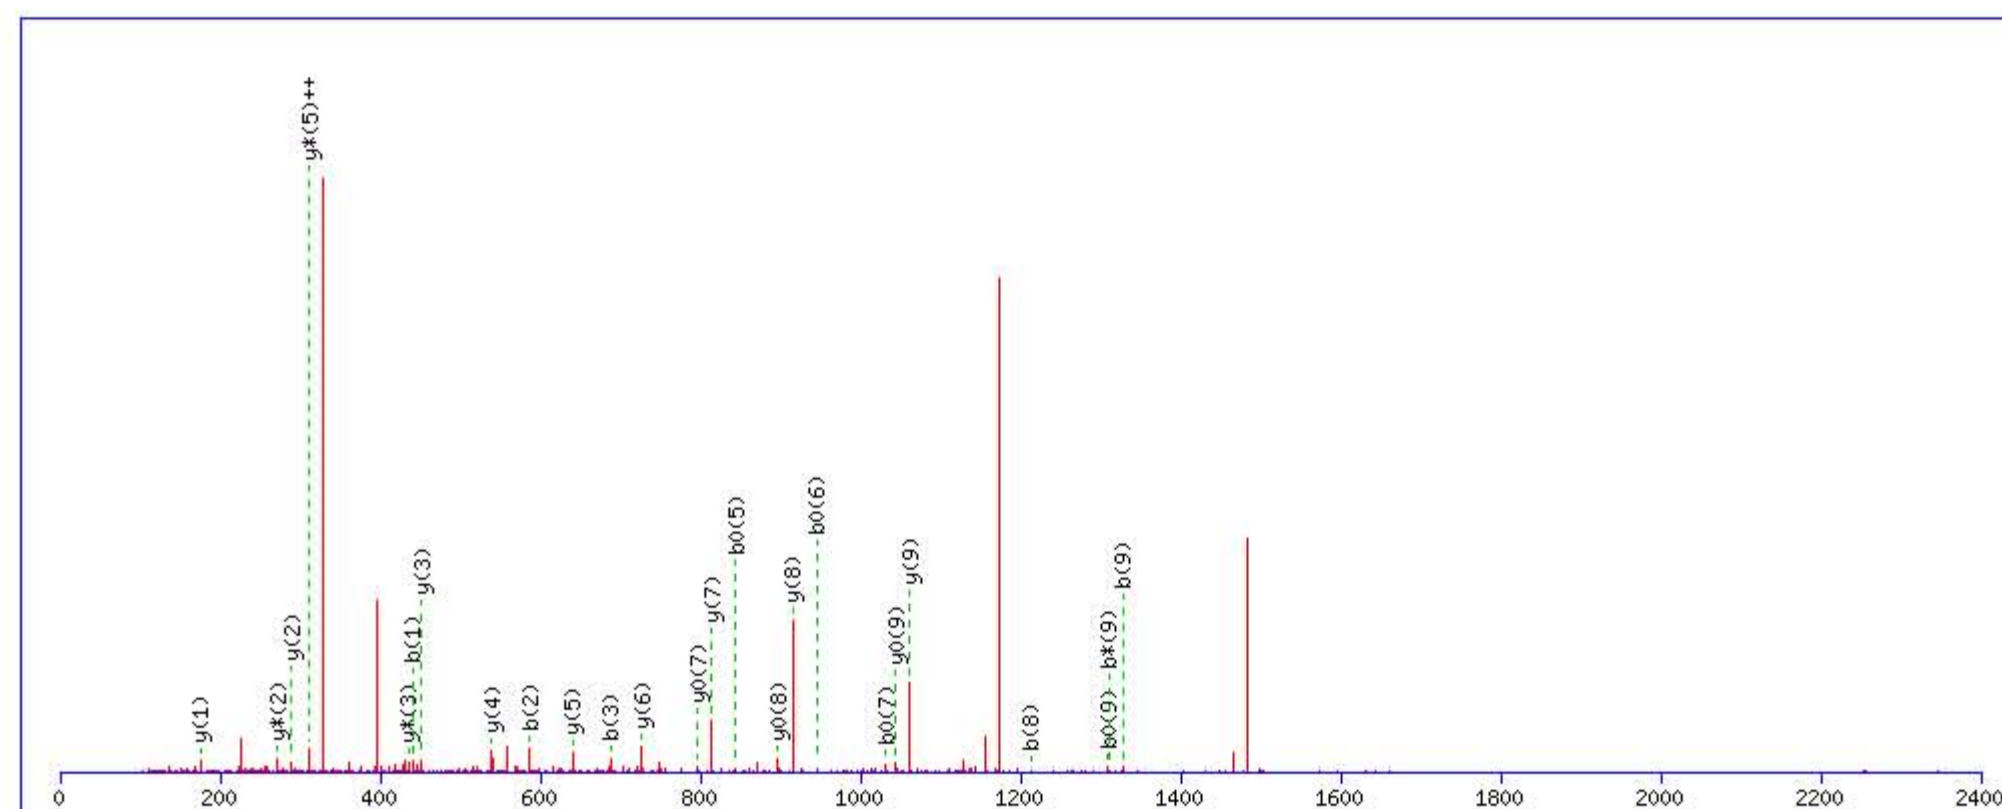

Monoisotopic mass of neutral peptide Mr(calc): 1500.703110

Fixed modifications: Carbamidomethyl (C) (apply to specified residues or termini only)

Variable modifications:

Q1 : Biotin:Thermo-21345 (Q)

Ions Score: 45 Expect: 0.00015

Matches : 25/98 fragment ions using 56 most intense peaks [\(help\)](#)

| #  | b           | b <sup>++</sup> | b <sup>*</sup> | b <sup>*++</sup> | b <sup>0</sup> | b <sup>0++</sup> | Seq. | y           | y <sup>++</sup> | y <sup>*</sup> | y <sup>*++</sup> | y <sup>0</sup> | y <sup>0++</sup> | #  |
|----|-------------|-----------------|----------------|------------------|----------------|------------------|------|-------------|-----------------|----------------|------------------|----------------|------------------|----|
| 1  | 440.232602  | 220.619939      | 423.206053     | 212.106664       |                |                  | Q    |             |                 |                |                  |                |                  | 10 |
| 2  | 587.301016  | 294.154146      | 570.274467     | 285.640872       |                |                  | F    | 1062.485064 | 531.746170      | 1045.458515    | 523.232896       | 1044.474499    | 522.740887       | 9  |
| 3  | 688.348695  | 344.677986      | 671.322146     | 336.164711       | 670.338130     | 335.672703       | T    | 915.416650  | 458.211963      | 898.390101     | 449.698689       | 897.406085     | 449.206681       | 8  |
| 4  | 775.380723  | 388.194000      | 758.354174     | 379.680725       | 757.370158     | 379.188717       | S    | 814.368971  | 407.688124      | 797.342422     | 399.174849       | 796.358406     | 398.682841       | 7  |
| 5  | 862.412751  | 431.710014      | 845.386202     | 423.196739       | 844.402186     | 422.704731       | S    | 727.336943  | 364.172110      | 710.310394     | 355.658835       | 709.326378     | 355.166827       | 6  |
| 6  | 963.460430  | 482.233853      | 946.433881     | 473.720578       | 945.449865     | 473.228570       | T    | 640.304915  | 320.656096      | 623.278366     | 312.142821       | 622.294350     | 311.650813       | 5  |
| 7  | 1050.492458 | 525.749867      | 1033.465909    | 517.236593       | 1032.481893    | 516.744584       | S    | 539.257236  | 270.132256      | 522.230687     | 261.618982       | 521.246671     | 261.126974       | 4  |
| 8  | 1213.555787 | 607.281532      | 1196.529238    | 598.768257       | 1195.545222    | 598.276249       | Y    | 452.225208  | 226.616242      | 435.198659     | 218.102967       |                |                  | 3  |
| 9  | 1327.598714 | 664.302995      | 1310.572165    | 655.789721       | 1309.588149    | 655.297712       | N    | 289.161879  | 145.084577      | 272.135330     | 136.571303       |                |                  | 2  |
| 10 |             |                 |                |                  |                |                  | R    | 175.118952  | 88.063114       | 158.092403     | 79.549839        |                |                  | 1  |

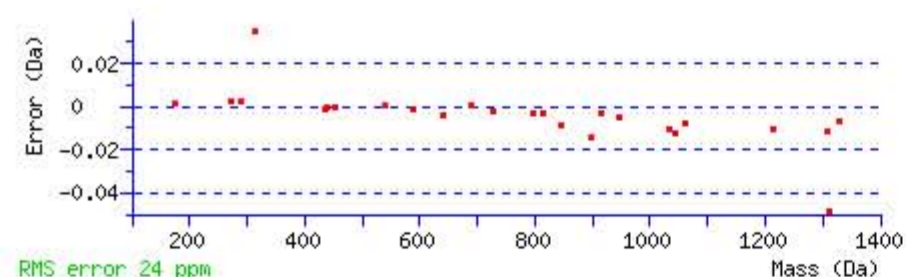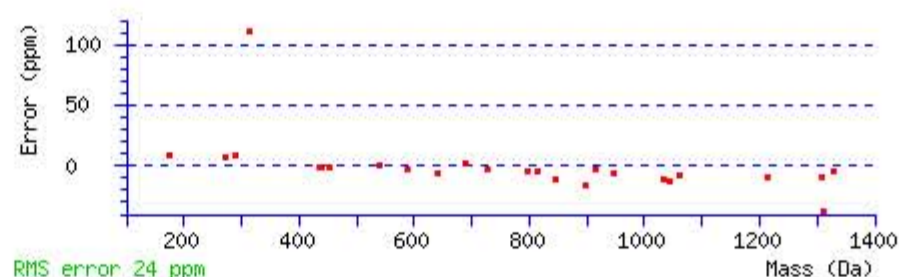

NCBI BLAST search of [QFTSSTSYNR](#)

(Parameters: blastp, nr protein database, expect=20000, no filter, PAM30)

Other BLAST [web gateways](#)

All matches to this query

| Score | Mr(calc):   | Delta     | Sequence                        |
|-------|-------------|-----------|---------------------------------|
| 44.6  | 1500.703110 | -0.007382 | <a href="#">QFTSSTSYNR</a>      |
| 3.5   | 1500.699768 | -0.004040 | <a href="#">AEAGSGGPGFTFTFR</a> |
| 1.6   | 1500.703110 | -0.007382 | <a href="#">DAEGWETVQR</a>      |
| 0.1   | 1500.714340 | -0.018612 | <a href="#">QCGKAFNLSSSFR</a>   |

Mascot: <http://www.matrixscience.com/>

# MASCOT SCIENCE Mascot Search Results

## Peptide View

MS/MS Fragmentation of **EVDLKDYEDQK**

Found in **FIBA\_HUMAN**, Fibrinogen alpha chain OS=Homo sapiens GN=FGA PE=1 SV=2

Match to Query 36166: 1819.868112 from(607.629980,3+) rtinseconds(1807) index(44805)

Title: Locus:1.1.1.3342.10 File:"2013-07-02 CLN FXIII 180 min 3rd F 4.wiff"

Data file C:\Program Files (x86)\Matrix Science\Mascot Daemon\mgf9 FXIII 180 min 3rd\mascot\_daemon\_merge.mgf

Click mouse within plot area to zoom in by factor of two about that point

Or, Plot from  to  Da

Label all possible matches  Label matches used for scoring

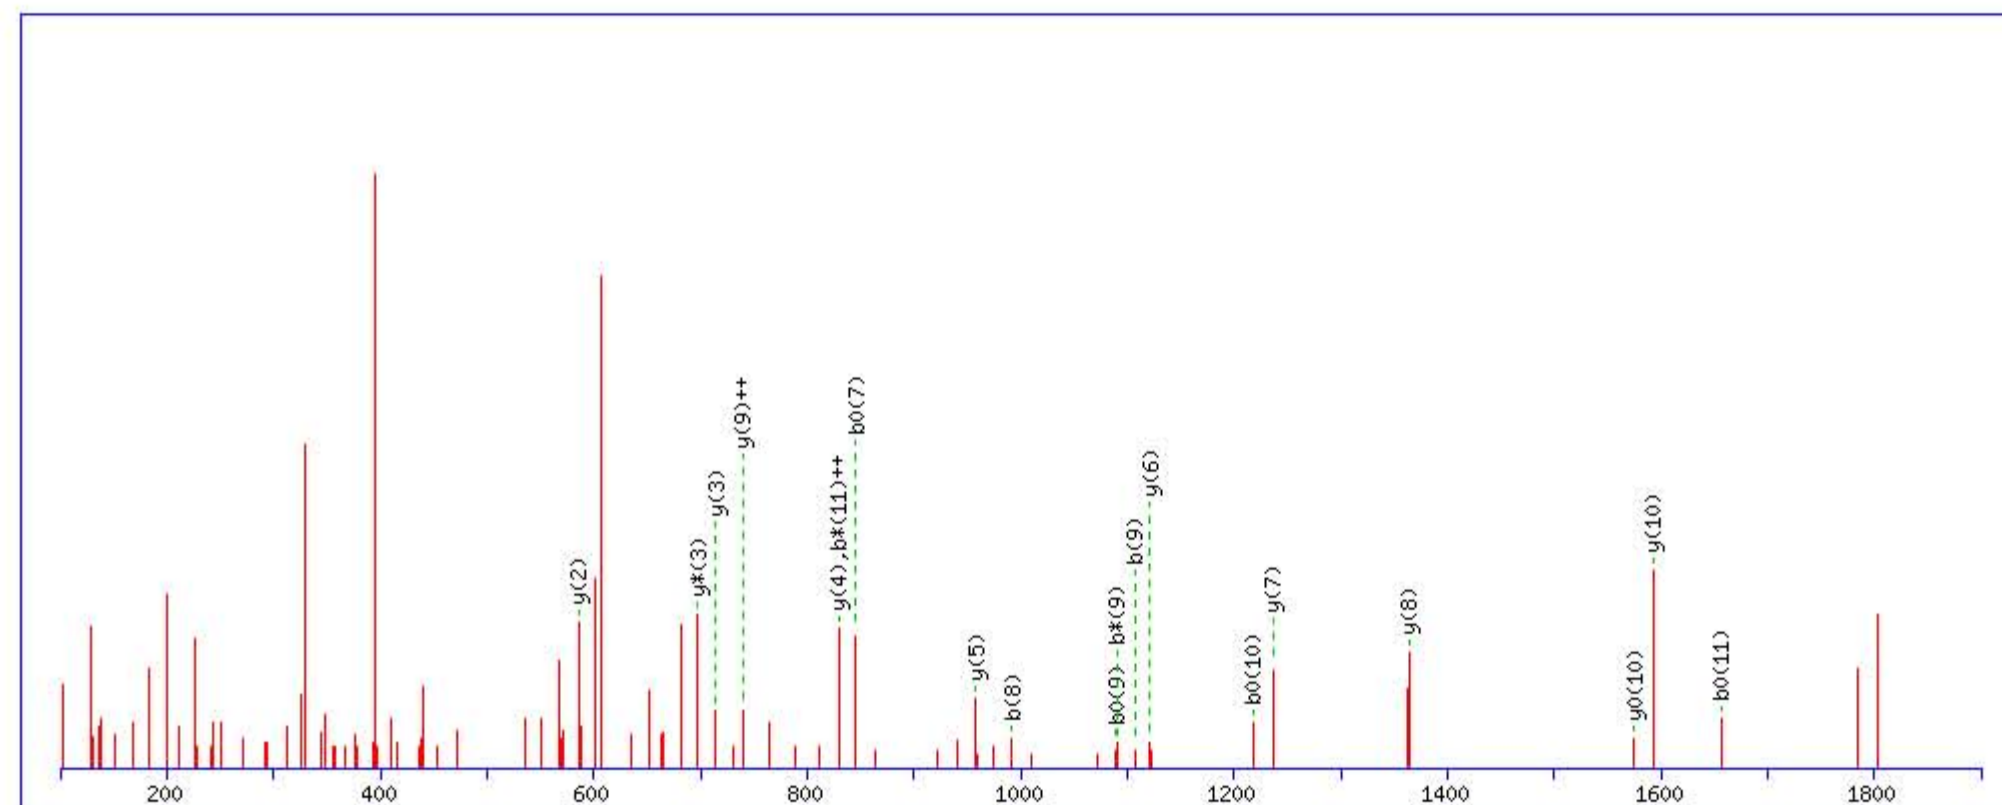

Monoisotopic mass of neutral peptide Mr(calc): 1819.866196

Fixed modifications: Carbamidomethyl (C) (apply to specified residues or termini only)

Variable modifications:

Q11 : Biotin:Thermo-21345 (Q)

Ions Score: 45 Expect: 0.00054

Matches : 19/118 fragment ions using 31 most intense peaks [\(help\)](#)

| #  | b                  | b <sup>++</sup> | b <sup>*</sup>     | b <sup>*++</sup>  | b <sup>0</sup>     | b <sup>0++</sup> | Seq. | y                  | y <sup>++</sup>   | y <sup>*</sup>    | y <sup>*++</sup> | y <sup>0</sup>     | y <sup>0++</sup> | #  |
|----|--------------------|-----------------|--------------------|-------------------|--------------------|------------------|------|--------------------|-------------------|-------------------|------------------|--------------------|------------------|----|
| 1  | 130.049869         | 65.528572       |                    |                   | 112.039304         | 56.523290        | E    |                    |                   |                   |                  |                    |                  | 12 |
| 2  | 229.118283         | 115.062780      |                    |                   | 211.107718         | 106.057497       | V    | 1691.830900        | 846.419088        | 1674.804351       | 837.905814       | 1673.820335        | 837.413806       | 11 |
| 3  | 344.145226         | 172.576251      |                    |                   | 326.134661         | 163.570969       | D    | <b>1592.762486</b> | 796.884881        | 1575.735937       | 788.371607       | <b>1574.751921</b> | 787.879599       | 10 |
| 4  | 457.229290         | 229.118283      |                    |                   | 439.218725         | 220.113001       | L    | 1477.735543        | <b>739.371410</b> | 1460.708994       | 730.858135       | 1459.724978        | 730.366127       | 9  |
| 5  | 585.324253         | 293.165765      | 568.297704         | 284.652490        | 567.313688         | 284.160482       | K    | <b>1364.651479</b> | 682.829378        | 1347.624930       | 674.316103       | 1346.640914        | 673.824095       | 8  |
| 6  | 700.351196         | 350.679236      | 683.324647         | 342.165962        | 682.340631         | 341.673954       | D    | <b>1236.556516</b> | 618.781896        | 1219.529967       | 610.268622       | 1218.545951        | 609.776614       | 7  |
| 7  | 863.414525         | 432.210901      | 846.387976         | 423.697626        | <b>845.403960</b>  | 423.205618       | Y    | <b>1121.529573</b> | 561.268425        | 1104.503024       | 552.755150       | 1103.519008        | 552.263142       | 6  |
| 8  | <b>992.457118</b>  | 496.732197      | 975.430569         | 488.218923        | 974.446553         | 487.726915       | E    | <b>958.466244</b>  | 479.736760        | 941.439695        | 471.223486       | 940.455679         | 470.731478       | 5  |
| 9  | <b>1107.484061</b> | 554.245669      | <b>1090.457512</b> | 545.732394        | <b>1089.473496</b> | 545.240386       | D    | <b>829.423651</b>  | 415.215464        | 812.397102        | 406.702189       | 811.413086         | 406.210181       | 4  |
| 10 | 1235.542639        | 618.274958      | 1218.516090        | 609.761683        | <b>1217.532074</b> | 609.269675       | Q    | <b>714.396708</b>  | 357.701992        | <b>697.370159</b> | 349.188718       |                    |                  | 3  |
| 11 | 1674.767965        | 837.887621      | 1657.741416        | <b>829.374346</b> | <b>1656.757400</b> | 828.882338       | Q    | <b>586.338130</b>  | 293.672703        | 569.311581        | 285.159429       |                    |                  | 2  |
| 12 |                    |                 |                    |                   |                    |                  | K    | 147.112804         | 74.060040         | 130.086255        | 65.546765        |                    |                  | 1  |

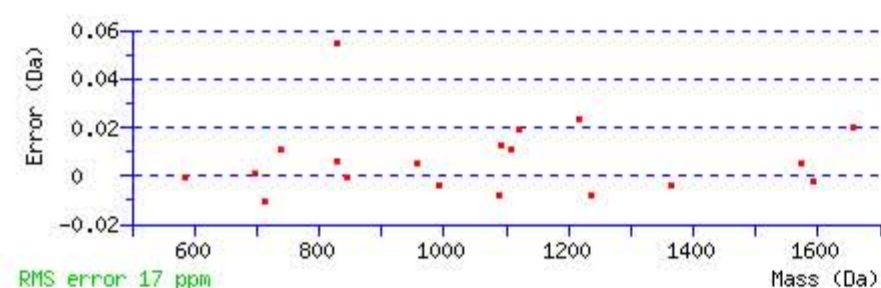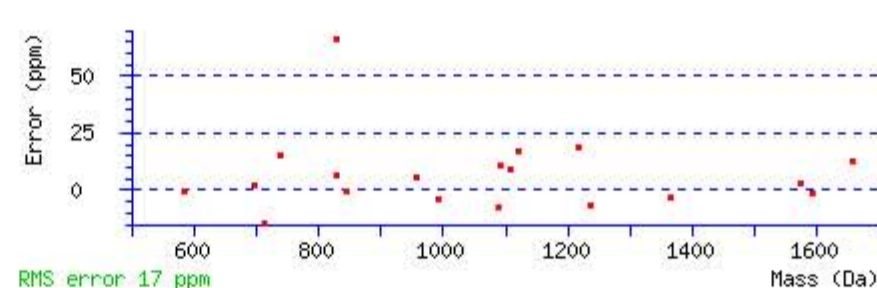

NCBI BLAST search of **EVDLKDYEDQK**

(Parameters: blastp, nr protein database, expect=20000, no filter, PAM30)

Other BLAST [web gateways](#)

All matches to this query

| Score | Mr(calc):   | Delta    | Sequence                    |
|-------|-------------|----------|-----------------------------|
| 45.4  | 1819.866196 | 0.001916 | <a href="#">EVDLKDYEDQK</a> |
| 32.5  | 1819.866196 | 0.001916 | <a href="#">EVDLKDYEDQK</a> |

Mascot: <http://www.matrixscience.com/>





# MASCOT Search Results

## Peptide View

MS/MS Fragmentation of **ISQLTR**

Found in **FIBB\_HUMAN**, Fibrinogen beta chain OS=Homo sapiens GN=FGB PE=1 SV=2

Match to Query 12329: 1027.581788 from(514.798170,2+) rtinseconds(1646) index(43843)

Title: Locus:1.1.1.3286.5 File:"2013-07-02 CLN FXIII 180 min 3rd F 4.wiff"

Data file C:\Program Files (x86)\Matrix Science\Mascot Daemon\mgf9 FXIII 180 min 3rd\mascot\_daemon\_merge.mgf

Click mouse within plot area to zoom in by factor of two about that point

Or, Plot from  to  Da

Label all possible matches  Label matches used for scoring

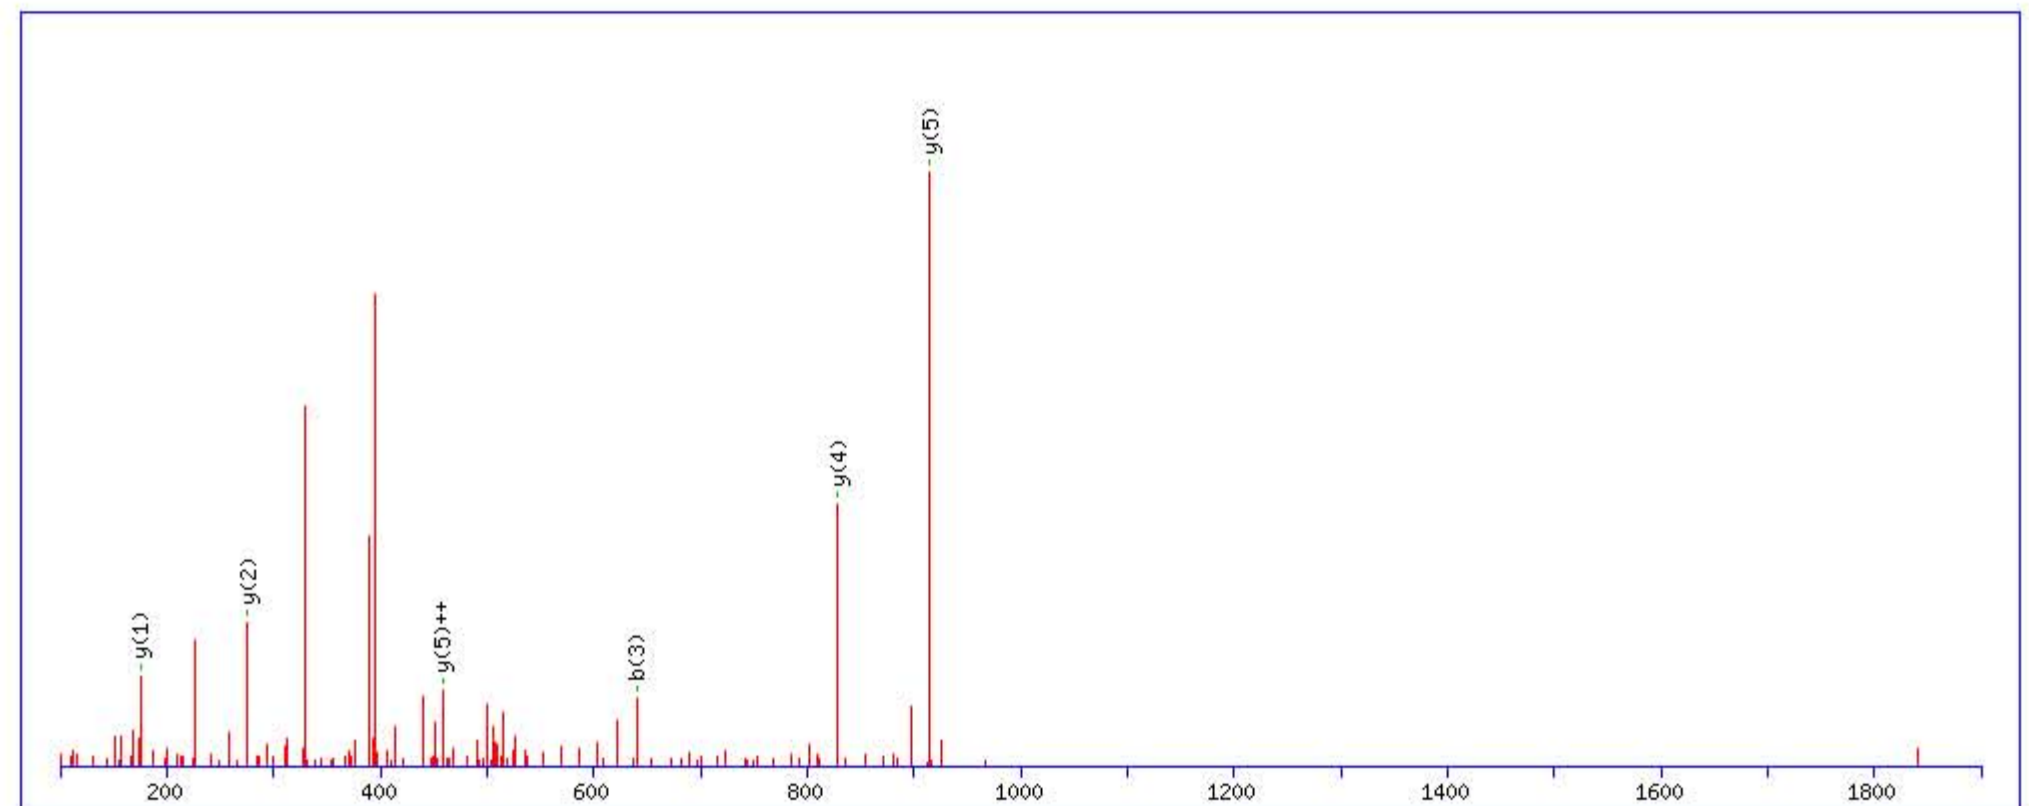

Monoisotopic mass of neutral peptide Mr(calc): 1027.584824

Fixed modifications: Carbamidomethyl (C) (apply to specified residues or termini only)

Variable modifications:

Q3 : Biotin:Thermo-21345 (Q)

Ions Score: 26 Expect: 0.057

Matches : 6/52 fragment ions using 9 most intense peaks [\(help\)](#)

| # | b          | b <sup>++</sup> | b <sup>*</sup> | b <sup>+++</sup> | b <sup>0</sup> | b <sup>0++</sup> | Seq. | y          | y <sup>++</sup> | y <sup>*</sup> | y <sup>+++</sup> | y <sup>0</sup> | y <sup>0++</sup> | # |
|---|------------|-----------------|----------------|------------------|----------------|------------------|------|------------|-----------------|----------------|------------------|----------------|------------------|---|
| 1 | 114.091340 | 57.549308       |                |                  |                |                  | I    |            |                 |                |                  |                |                  | 6 |
| 2 | 201.123368 | 101.065322      |                |                  | 183.112803     | 92.060039        | S    | 915.508049 | 458.257663      | 898.481500     | 449.744388       | 897.497484     | 449.252380       | 5 |
| 3 | 640.348694 | 320.677985      | 623.322145     | 312.164711       | 622.338129     | 311.672703       | Q    | 828.476021 | 414.741649      | 811.449472     | 406.228374       | 810.465456     | 405.736366       | 4 |
| 4 | 753.432758 | 377.220017      | 736.406209     | 368.706743       | 735.422193     | 368.214735       | L    | 389.250695 | 195.128986      | 372.224146     | 186.615711       | 371.240130     | 186.123703       | 3 |
| 5 | 854.480437 | 427.743857      | 837.453888     | 419.230582       | 836.469872     | 418.738574       | T    | 276.166631 | 138.586954      | 259.140082     | 130.073679       | 258.156066     | 129.581671       | 2 |
| 6 |            |                 |                |                  |                |                  | R    | 175.118952 | 88.063114       | 158.092403     | 79.549840        |                |                  | 1 |

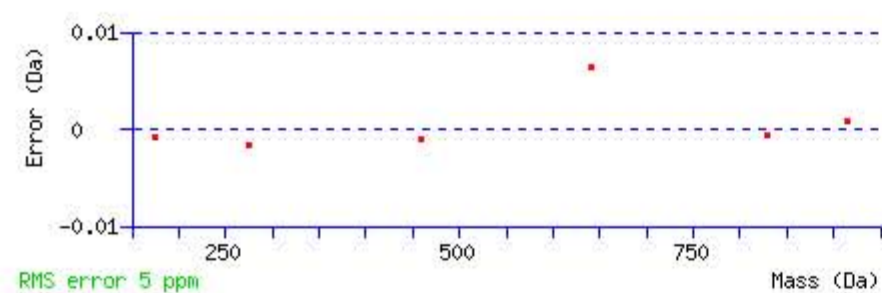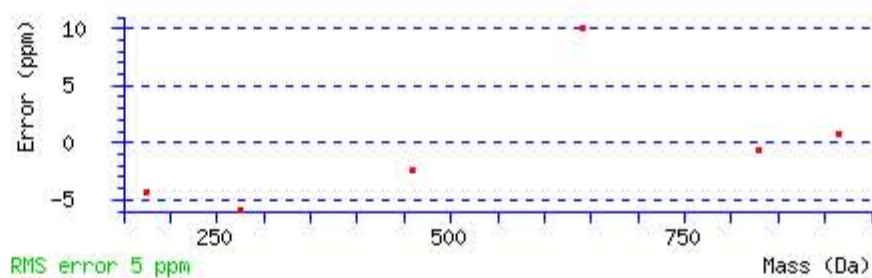

NCBI BLAST search of **ISQLTR**

(Parameters: blastp, nr protein database, expect=20000, no filter, PAM30)

Other BLAST [web gateways](#)

All matches to this query

| Score | Mr(calc):   | Delta     | Sequence                  |
|-------|-------------|-----------|---------------------------|
| 25.6  | 1027.584824 | -0.003036 | <a href="#">ISQLTR</a>    |
| 13.7  | 1027.573578 | 0.008210  | <a href="#">ISQLEK</a>    |
| 12.1  | 1027.584824 | -0.003036 | <a href="#">ILSQTR</a>    |
| 10.7  | 1027.584839 | -0.003051 | <a href="#">LQTVTR</a>    |
| 10.7  | 1027.592682 | -0.010894 | <a href="#">LRLSWPTR</a>  |
| 9.2   | 1027.592667 | -0.010879 | <a href="#">IYQAHKR</a>   |
| 9.1   | 1027.584839 | -0.003051 | <a href="#">VTQLTR</a>    |
| 8.9   | 1027.573578 | 0.008210  | <a href="#">ILQVPAMEK</a> |
| 7.2   | 1027.584839 | -0.003051 | <a href="#">VTQILR</a>    |
| 6.1   | 1027.584839 | -0.003051 | <a href="#">TVLQTR</a>    |

Mascot: <http://www.matrixscience.com/>



# MASCOT SEARCH RESULTS

## Peptide View

MS/MS Fragmentation of **YQISVNK**

Found in **FIBB\_HUMAN**, Fibrinogen beta chain OS=Homo sapiens GN=FGB PE=1 SV=2

Match to Query 16590: 1161.617408 from(581.815980,2+) rtinseconds(1709) index(17168)

Title: Locus:1.1.1.3161.5 File:"2013-07-02 CLN FXIII 180 min 3rd F 2.wiff"

Data file C:\Program Files (x86)\Matrix Science\Mascot Daemon\mgf9 FXIII 180 min 3rd\mascot\_daemon\_merge.mgf

Click mouse within plot area to zoom in by factor of two about that point

Or, Plot from  to  Da

Label all possible matches  Label matches used for scoring

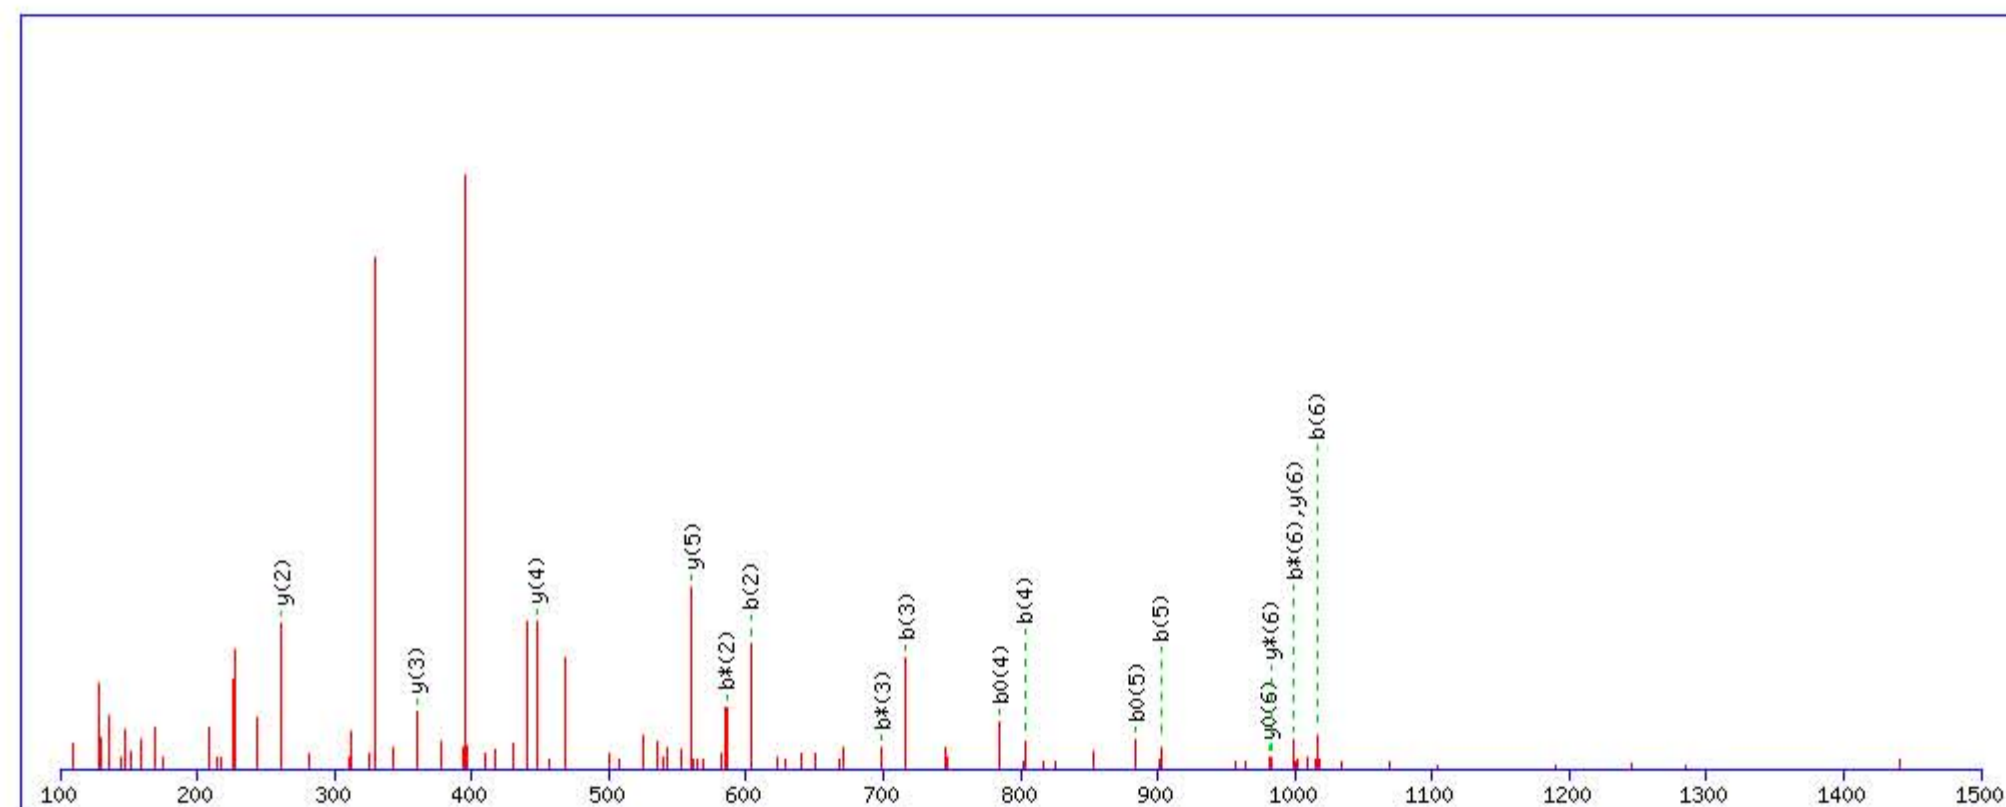

Monoisotopic mass of neutral peptide Mr(calc): 1161.621597

Fixed modifications: Carbamidomethyl (C) (apply to specified residues or termini only)

Variable modifications:

Q2 : Biotin:Thermo-21345 (Q)

Ions Score: 25 Expect: 0.059

Matches : 17/58 fragment ions using 30 most intense peaks [\(help\)](#)

| # | b                  | b <sup>++</sup> | b <sup>*</sup>    | b <sup>*++</sup> | b <sup>0</sup>    | b <sup>0++</sup> | Seq. | y                 | y <sup>++</sup> | y <sup>*</sup>    | y <sup>*++</sup> | y <sup>0</sup>    | y <sup>0++</sup> | # |
|---|--------------------|-----------------|-------------------|------------------|-------------------|------------------|------|-------------------|-----------------|-------------------|------------------|-------------------|------------------|---|
| 1 | 164.070605         | 82.538940       |                   |                  |                   |                  | Y    |                   |                 |                   |                  |                   |                  | 7 |
| 2 | <b>603.295931</b>  | 302.151604      | <b>586.269382</b> | 293.638329       |                   |                  | Q    | <b>999.565563</b> | 500.286419      | <b>982.539014</b> | 491.773145       | <b>981.554998</b> | 491.281137       | 6 |
| 3 | <b>716.379995</b>  | 358.693636      | <b>699.353446</b> | 350.180361       |                   |                  | I    | <b>560.340237</b> | 280.673756      | 543.313688        | 272.160482       | 542.329672        | 271.668474       | 5 |
| 4 | <b>803.412023</b>  | 402.209650      | 786.385474        | 393.696375       | <b>785.401458</b> | 393.204367       | S    | <b>447.256173</b> | 224.131724      | 430.229624        | 215.618450       | 429.245608        | 215.126442       | 4 |
| 5 | <b>902.480437</b>  | 451.743857      | 885.453888        | 443.230582       | <b>884.469872</b> | 442.738574       | V    | <b>360.224145</b> | 180.615710      | 343.197596        | 172.102436       |                   |                  | 3 |
| 6 | <b>1016.523364</b> | 508.765320      | <b>999.496815</b> | 500.252046       | 998.512799        | 499.760038       | N    | <b>261.155731</b> | 131.081503      | 244.129182        | 122.568229       |                   |                  | 2 |
| 7 |                    |                 |                   |                  |                   |                  | K    | 147.112804        | 74.060040       | 130.086255        | 65.546765        |                   |                  | 1 |

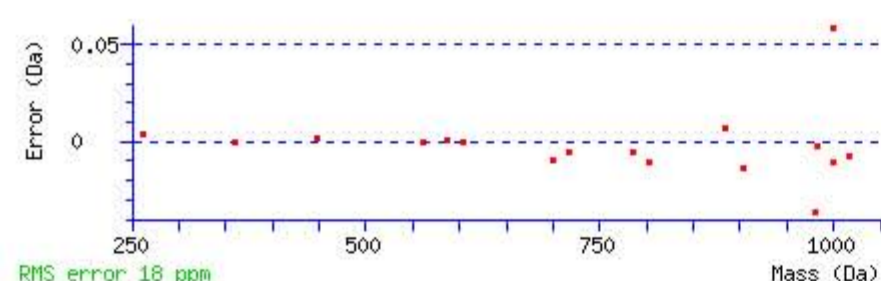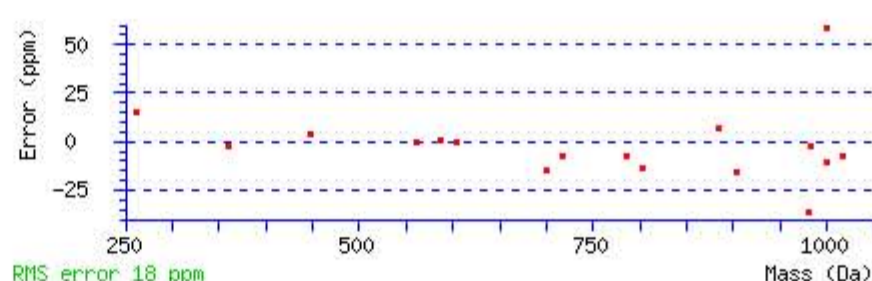

NCBI BLAST search of **YQISVNK**

(Parameters: blastp, nr protein database, expect=20000, no filter, PAM30)

Other BLAST [web gateways](#)

All matches to this query

| Score | Mr(calc):   | Delta     | Sequence                   |
|-------|-------------|-----------|----------------------------|
| 25.1  | 1161.621597 | -0.004189 | <a href="#">YQISVNK</a>    |
| 22.7  | 1161.629456 | -0.012048 | <a href="#">DFALRLWNK</a>  |
| 3.8   | 1161.611694 | 0.005714  | <a href="#">WMIRNWIK</a>   |
| 2.4   | 1161.606323 | 0.011085  | <a href="#">EQAIAMLKDK</a> |
| 2.0   | 1161.628128 | -0.010720 | <a href="#">LESLDIPFTK</a> |
| 0.9   | 1161.602982 | 0.014426  | <a href="#">KNSVDPDFLK</a> |
| 0.4   | 1161.614197 | 0.003211  | <a href="#">YDISVKPANR</a> |

Mascot: <http://www.matrixscience.com/>

# **MASCOT** Mascot Search Results

## Peptide View

MS/MS Fragmentation of **QDGSVDFGR**

Found in **FIBB\_HUMAN**, Fibrinogen beta chain OS=Homo sapiens GN=FGB PE=1 SV=2

Match to Query 20193: 1290.607388 from(646.310970,2+) rtinseconds(1811) index(44828)

Title: Locus:1.1.1.3343.9 File:"2013-07-02 CLN FXIII 180 min 3rd F 4.wiff"

Data file C:\Program Files (x86)\Matrix Science\Mascot Daemon\mgf\9 FXIII 180 min 3rd\mascot\_daemon\_merge.mgf

Click mouse within plot area to zoom in by factor of two about that point

Or, Plot from  to  Da

Label all possible matches  Label matches used for scoring

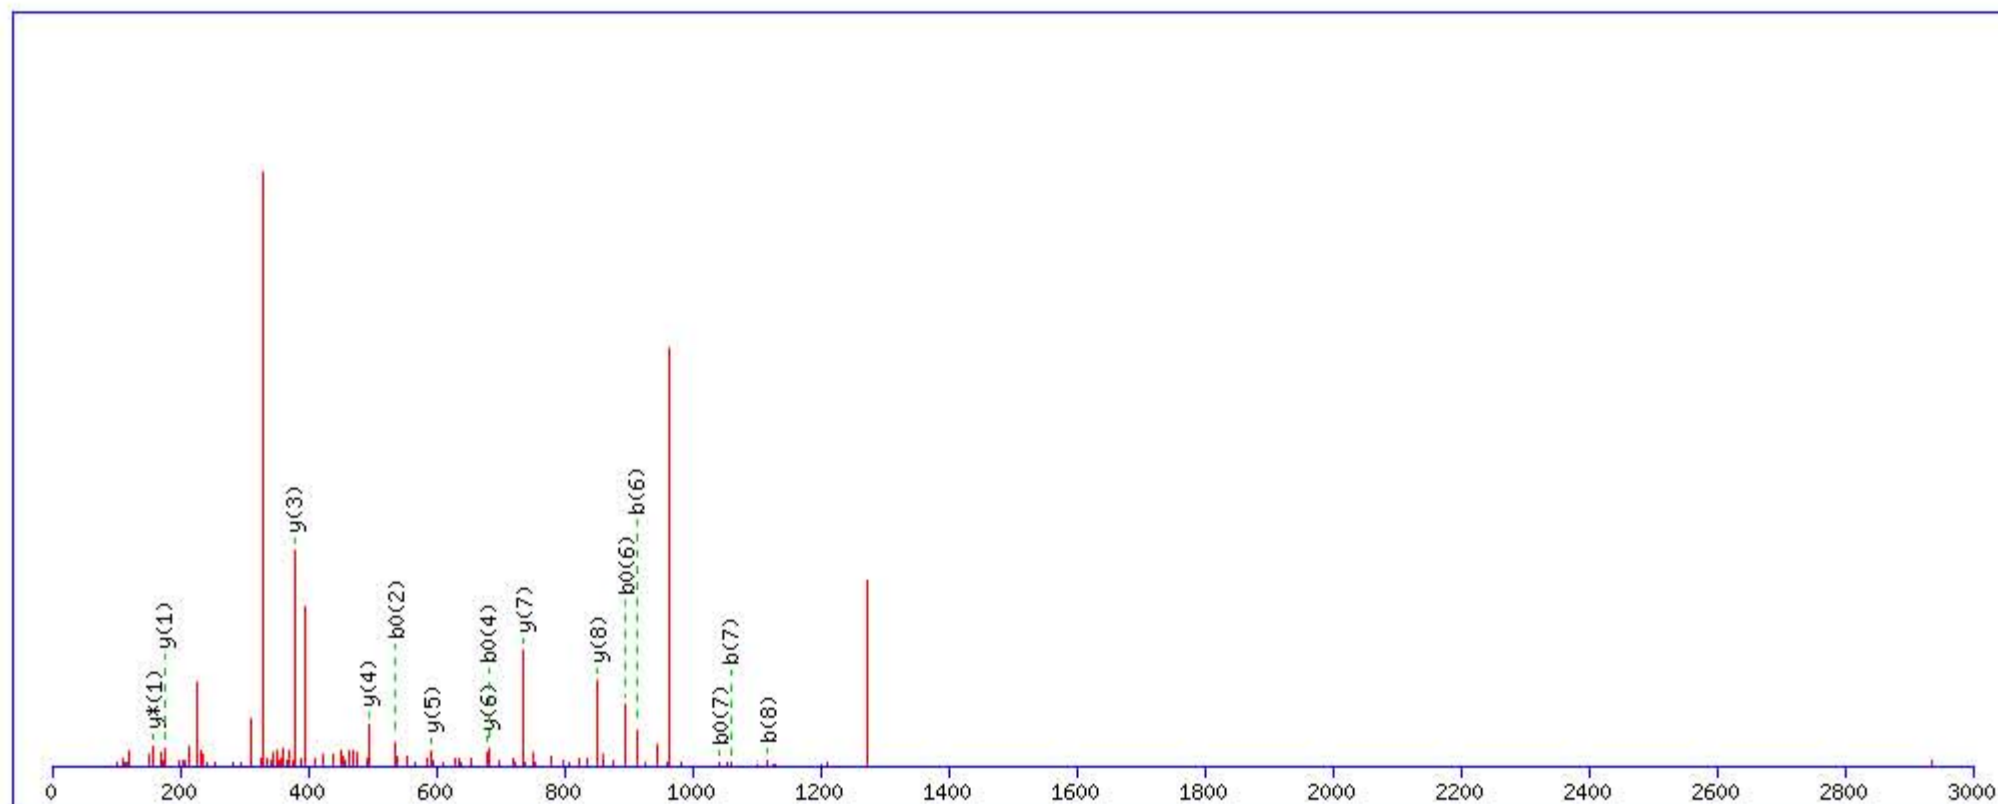

Monoisotopic mass of neutral peptide Mr(calc): 1290.602692

Fixed modifications: Carbamidomethyl (C) (apply to specified residues or termini only)

Variable modifications:

Q1 : Biotin:Thermo-21345 (Q)

Ions Score: 48 Expect: 0.00022

Matches : 15/88 fragment ions using 24 most intense peaks [\(help\)](#)

| # | b           | b <sup>++</sup> | b <sup>*</sup> | b <sup>*++</sup> | b <sup>0</sup> | b <sup>0++</sup> | Seq. | y          | y <sup>++</sup> | y <sup>*</sup> | y <sup>*++</sup> | y <sup>0</sup> | y <sup>0++</sup> | # |
|---|-------------|-----------------|----------------|------------------|----------------|------------------|------|------------|-----------------|----------------|------------------|----------------|------------------|---|
| 1 | 440.232602  | 220.619939      | 423.206053     | 212.106664       |                |                  | Q    |            |                 |                |                  |                |                  | 9 |
| 2 | 555.259545  | 278.133411      | 538.232996     | 269.620136       | 537.248980     | 269.128128       | D    | 852.384622 | 426.695949      | 835.358073     | 418.182674       | 834.374057     | 417.690666       | 8 |
| 3 | 612.281009  | 306.644143      | 595.254460     | 298.130868       | 594.270444     | 297.638860       | G    | 737.357679 | 369.182477      | 720.331130     | 360.669203       | 719.347114     | 360.177195       | 7 |
| 4 | 699.313037  | 350.160157      | 682.286488     | 341.646882       | 681.302472     | 341.154874       | S    | 680.336215 | 340.671745      | 663.309666     | 332.158471       | 662.325650     | 331.666463       | 6 |
| 5 | 798.381451  | 399.694364      | 781.354902     | 391.181089       | 780.370886     | 390.689081       | V    | 593.304187 | 297.155731      | 576.277638     | 288.642457       | 575.293622     | 288.150449       | 5 |
| 6 | 913.408394  | 457.207835      | 896.381845     | 448.694560       | 895.397829     | 448.202552       | D    | 494.235773 | 247.621524      | 477.209224     | 239.108250       | 476.225208     | 238.616242       | 4 |
| 7 | 1060.476808 | 530.742042      | 1043.450259    | 522.228768       | 1042.466243    | 521.736759       | F    | 379.208830 | 190.108053      | 362.182281     | 181.594778       |                |                  | 3 |
| 8 | 1117.498272 | 559.252774      | 1100.471723    | 550.739499       | 1099.487707    | 550.247491       | G    | 232.140416 | 116.573846      | 215.113867     | 108.060571       |                |                  | 2 |
| 9 |             |                 |                |                  |                |                  | R    | 175.118952 | 88.063114       | 158.092403     | 79.549839        |                |                  | 1 |

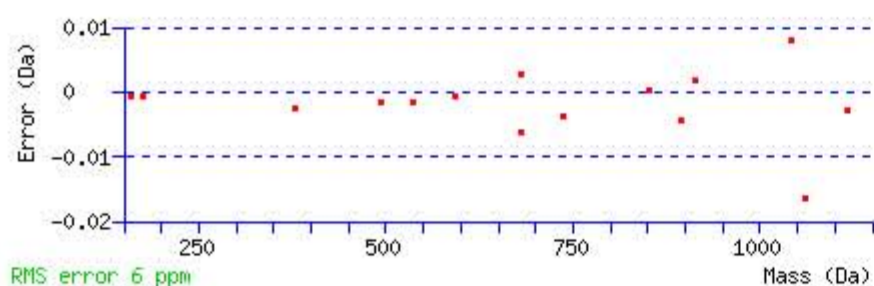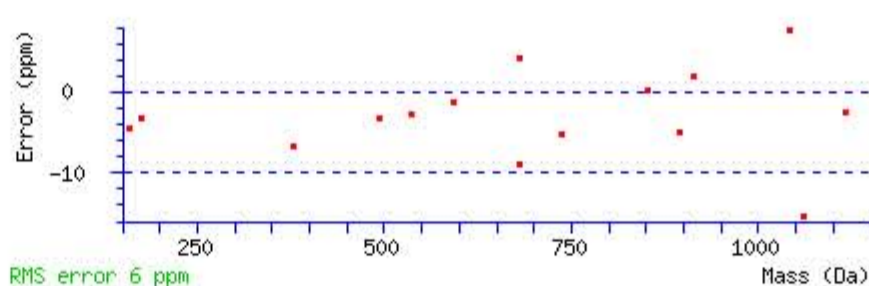

NCBI BLAST search of **QDGSVDFGR**

(Parameters: blastp, nr protein database, expect=20000, no filter, PAM30)

Other BLAST [web gateways](#)

All matches to this query

| Score | Mr(calc):   | Delta    | Sequence                  |
|-------|-------------|----------|---------------------------|
| 48.0  | 1290.602692 | 0.004696 | <a href="#">QDGSVDFGR</a> |

Mascot: <http://www.matrixscience.com/>

# **MASCOT** Mascot Search Results

## Peptide View

MS/MS Fragmentation of **IRPFFPQQ**

Found in **FIBB\_HUMAN**, Fibrinogen beta chain OS=Homo sapiens GN=FGB PE=1 SV=2

Match to Query 21183: 1342.721888 from(672.368220,2+) rtinseconds(2303) index(47856)

Title: Locus:1.1.1.3514.6 File:"2013-07-02 CLN FXIII 180 min 3rd F 4.wiff"

Data file C:\Program Files (x86)\Matrix Science\Mascot Daemon\mgf\9 FXIII 180 min 3rd\mascot\_daemon\_merge.mgf

Click mouse within plot area to zoom in by factor of two about that point

Or, Plot from  to  Da

Label all possible matches  Label matches used for scoring

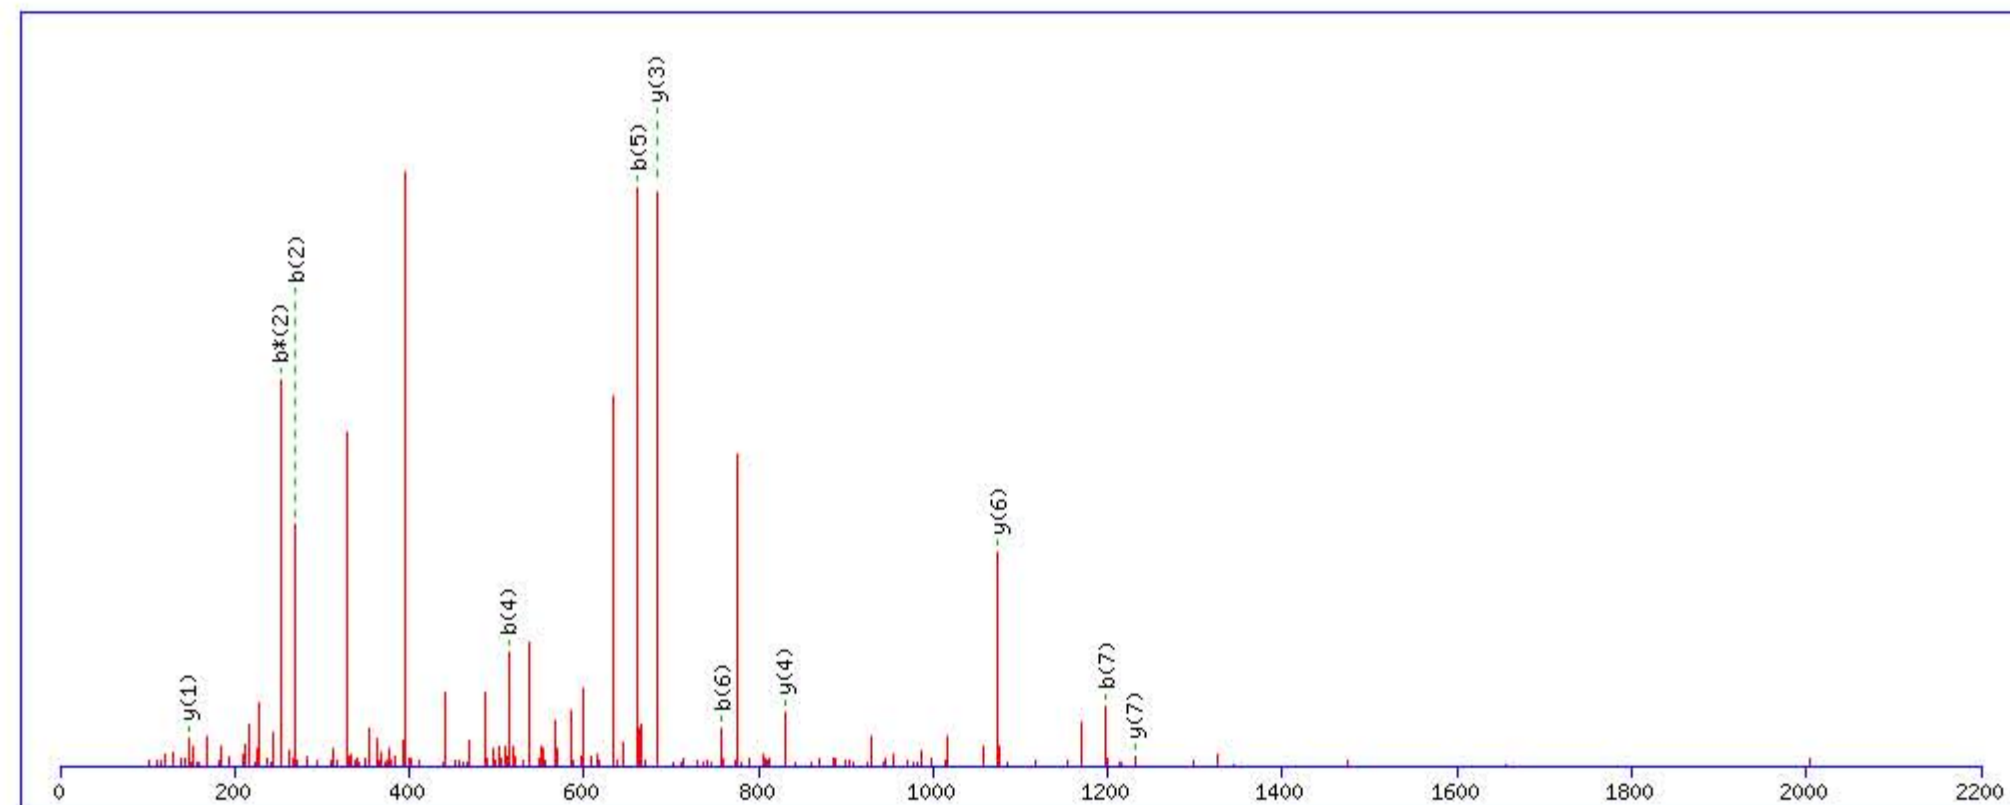

Monoisotopic mass of neutral peptide Mr(calc): 1342.722000

Fixed modifications: Carbamidomethyl (C) (apply to specified residues or termini only)

Variable modifications:

Q7 : Biotin:Thermo-21345 (Q)

Ions Score: 25 Expect: 0.033

Matches : 11/54 fragment ions using 25 most intense peaks [\(help\)](#)

| # | b                  | b <sup>++</sup> | b <sup>*</sup>    | b <sup>*++</sup> | Seq. | y                  | y <sup>++</sup> | y <sup>*</sup> | y <sup>*++</sup> | # |
|---|--------------------|-----------------|-------------------|------------------|------|--------------------|-----------------|----------------|------------------|---|
| 1 | 114.091340         | 57.549308       |                   |                  | I    |                    |                 |                |                  | 8 |
| 2 | <b>270.192451</b>  | 135.599864      | <b>253.165902</b> | 127.086589       | R    | <b>1230.645212</b> | 615.826244      | 1213.618663    | 607.312970       | 7 |
| 3 | 367.245215         | 184.126245      | 350.218666        | 175.612971       | P    | <b>1074.544101</b> | 537.775689      | 1057.517552    | 529.262414       | 6 |
| 4 | <b>514.313629</b>  | 257.660453      | 497.287080        | 249.147178       | F    | 977.491337         | 489.249307      | 960.464788     | 480.736032       | 5 |
| 5 | <b>661.382043</b>  | 331.194660      | 644.355494        | 322.681385       | F    | <b>830.422923</b>  | 415.715100      | 813.396374     | 407.201825       | 4 |
| 6 | <b>758.434807</b>  | 379.721042      | 741.408258        | 371.207767       | P    | <b>683.354509</b>  | 342.180893      | 666.327960     | 333.667618       | 3 |
| 7 | <b>1197.660133</b> | 599.333705      | 1180.633584       | 590.820430       | Q    | 586.301745         | 293.654511      | 569.275196     | 285.141236       | 2 |
| 8 |                    |                 |                   |                  | Q    | <b>147.076419</b>  | 74.041848       | 130.049870     | 65.528573        | 1 |

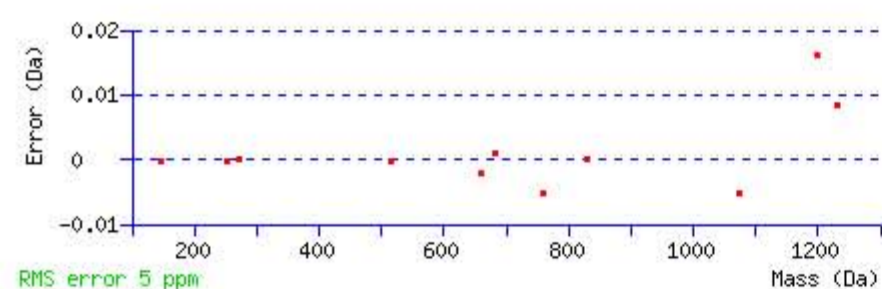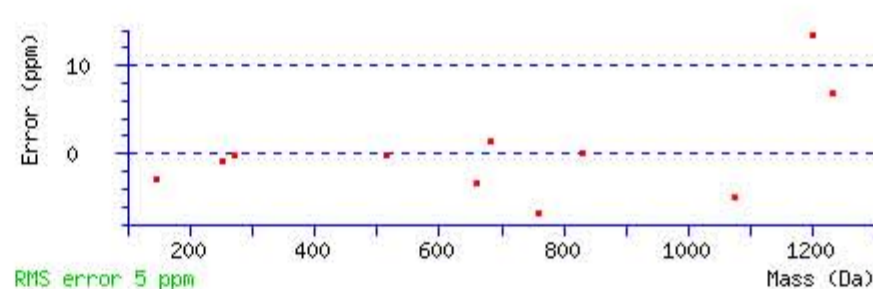

NCBI BLAST search of [IRPFFPQQ](#)

(Parameters: blastp, nr protein database, expect=20000, no filter, PAM30)

Other BLAST [web gateways](#)

### All matches to this query

| Score | Mr(calc):   | Delta     | Sequence                     |
|-------|-------------|-----------|------------------------------|
| 25.1  | 1342.722000 | -0.000112 | <a href="#">IRPFFPQQ</a>     |
| 15.2  | 1342.722000 | -0.000112 | <a href="#">IRPFFPQQ</a>     |
| 8.9   | 1342.716629 | 0.005259  | <a href="#">LLSVTEDQK</a>    |
| 4.4   | 1342.710098 | 0.011790  | <a href="#">VPMMSDPKAVLR</a> |
| 4.1   | 1342.727844 | -0.005956 | <a href="#">LALEQQQLICK</a>  |
| 3.5   | 1342.727859 | -0.005971 | <a href="#">ATPTSTAKQK</a>   |
| 1.9   | 1342.729187 | -0.007299 | <a href="#">QPHRPIER</a>     |

# MASCOT Search Results

## Peptide View

MS/MS Fragmentation of **AHYGGFTVQNEANK**

Found in **FIBB\_HUMAN**, Fibrinogen beta chain OS=Homo sapiens GN=FGB PE=1 SV=2

Match to Query 36541: 1845.880782 from(616.300870,3+) rtinseconds(1712) index(44196)  
 Title: Locus:1.1.1.3309.7 File:"2013-07-02 CLN FXIII 180 min 3rd F 4.wiff"

Data file C:\Program Files (x86)\Matrix Science\Mascot Daemon\mgf9 FXIII 180 min 3rd\mascot\_daemon\_merge.mgf

Click mouse within plot area to zoom in by factor of two about that point

Or, Plot from  to  Da

Label all possible matches  Label matches used for scoring

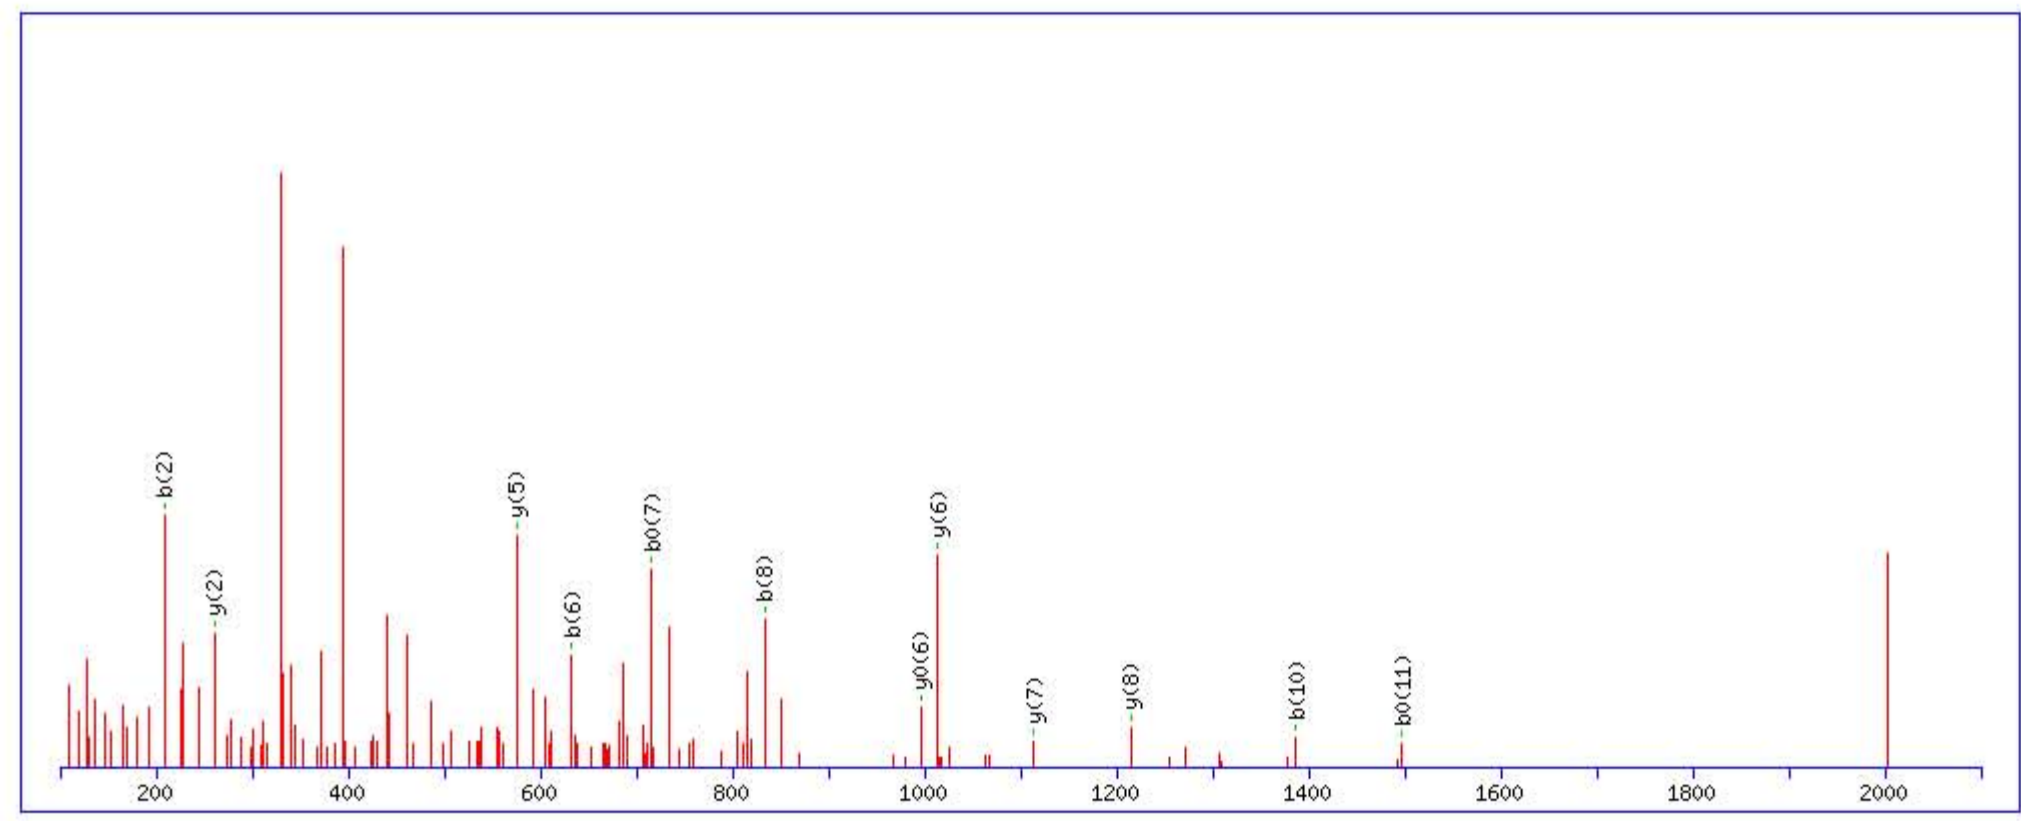

Monoisotopic mass of neutral peptide Mr(calc): 1845.883194

Fixed modifications: Carbamidomethyl (C) (apply to specified residues or termini only)

Variable modifications:

Q9 : Biotin:Thermo-21345 (Q)

Ions Score: 40 Expect: 0.0019

Matches : 12/122 fragment ions using 14 most intense peaks [\(help\)](#)

| #  | b                  | b <sup>++</sup> | b <sup>*</sup> | b <sup>***</sup> | b <sup>0</sup>     | b <sup>0++</sup> | Seq. | y                  | y <sup>++</sup> | y <sup>*</sup> | y <sup>***</sup> | y <sup>0</sup>    | y <sup>0++</sup> | #  |
|----|--------------------|-----------------|----------------|------------------|--------------------|------------------|------|--------------------|-----------------|----------------|------------------|-------------------|------------------|----|
| 1  | 72.044390          | 36.525833       |                |                  |                    |                  | A    |                    |                 |                |                  |                   |                  | 14 |
| 2  | <b>209.103302</b>  | 105.055289      |                |                  |                    |                  | H    | 1775.853367        | 888.430321      | 1758.826818    | 879.917047       | 1757.842802       | 879.425039       | 13 |
| 3  | 372.166631         | 186.586953      |                |                  |                    |                  | Y    | 1638.794455        | 819.900866      | 1621.767906    | 811.387591       | 1620.783890       | 810.895583       | 12 |
| 4  | 429.188095         | 215.097685      |                |                  |                    |                  | G    | 1475.731126        | 738.369201      | 1458.704577    | 729.855927       | 1457.720561       | 729.363918       | 11 |
| 5  | 486.209559         | 243.608417      |                |                  |                    |                  | G    | 1418.709662        | 709.858469      | 1401.683113    | 701.345195       | 1400.699097       | 700.853186       | 10 |
| 6  | <b>633.277973</b>  | 317.142625      |                |                  |                    |                  | F    | 1361.688198        | 681.347737      | 1344.661649    | 672.834463       | 1343.677633       | 672.342455       | 9  |
| 7  | 734.325652         | 367.666464      |                |                  | <b>716.315087</b>  | 358.661182       | T    | <b>1214.619784</b> | 607.813530      | 1197.593235    | 599.300256       | 1196.609219       | 598.808247       | 8  |
| 8  | <b>833.394066</b>  | 417.200671      |                |                  | 815.383501         | 408.195388       | V    | <b>1113.572105</b> | 557.289691      | 1096.545556    | 548.776416       | 1095.561540       | 548.284408       | 7  |
| 9  | 1272.619392        | 636.813334      | 1255.592843    | 628.300059       | 1254.608827        | 627.808051       | Q    | <b>1014.503691</b> | 507.755484      | 997.477142     | 499.242209       | <b>996.493126</b> | 498.750201       | 6  |
| 10 | <b>1386.662319</b> | 693.834797      | 1369.635770    | 685.321523       | 1368.651754        | 684.829515       | N    | <b>575.278365</b>  | 288.142821      | 558.251816     | 279.629546       | 557.267800        | 279.137538       | 5  |
| 11 | 1515.704912        | 758.356094      | 1498.678363    | 749.842820       | <b>1497.694347</b> | 749.350811       | E    | 461.235438         | 231.121357      | 444.208889     | 222.608083       | 443.224873        | 222.116075       | 4  |
| 12 | 1586.742026        | 793.874651      | 1569.715477    | 785.361377       | 1568.731461        | 784.869368       | A    | 332.192845         | 166.600060      | 315.166296     | 158.086786       |                   |                  | 3  |
| 13 | 1700.784953        | 850.896114      | 1683.758404    | 842.382840       | 1682.774388        | 841.890832       | N    | <b>261.155731</b>  | 131.081503      | 244.129182     | 122.568229       |                   |                  | 2  |
| 14 |                    |                 |                |                  |                    |                  | K    | 147.112804         | 74.060040       | 130.086255     | 65.546765        |                   |                  | 1  |

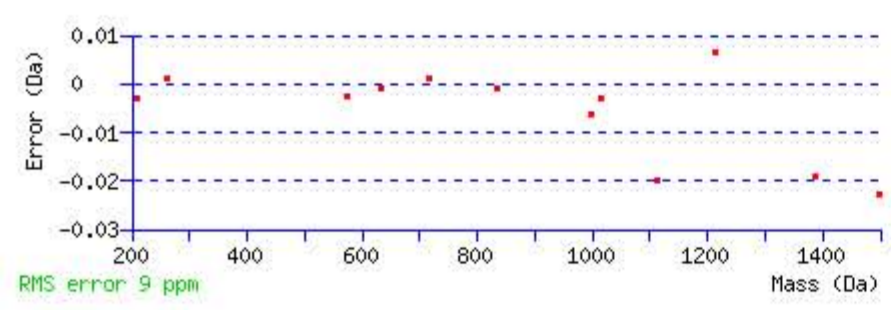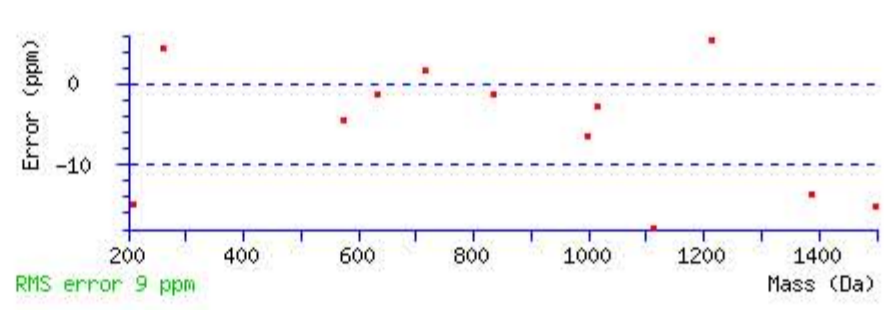

NCBI BLAST search of [AHYGGFTVQNEANK](#)

(Parameters: blastp, nr protein database, expect=20000, no filter, PAM30)

Other BLAST [web gateways](#)

### All matches to this query

| Score | Mr(calc):   | Delta     | Sequence                       |
|-------|-------------|-----------|--------------------------------|
| 40.1  | 1845.883194 | -0.002412 | <a href="#">AHYGGFTVQNEANK</a> |

# MASCOT Search Results

## Peptide View

MS/MS Fragmentation of **HQLYIDETVNSNIPTNLR**

Found in **FIBB\_HUMAN**, Fibrinogen beta chain OS=Homo sapiens GN=FGB PE=1 SV=2

Match to Query 47071: 2437.244052 from(813.421960,3+) rtinseconds(2189) index(47197)

Title: Locus:1.1.1.3474.21 File:"2013-07-02 CLN FXIII 180 min 3rd F 4.wiff"

Data file C:\Program Files (x86)\Matrix Science\Mascot Daemon\mgf9 FXIII 180 min 3rd\mascot\_daemon\_merge.mgf

Click mouse within plot area to zoom in by factor of two about that point

Or, Plot from  to  Da

Label all possible matches  Label matches used for scoring

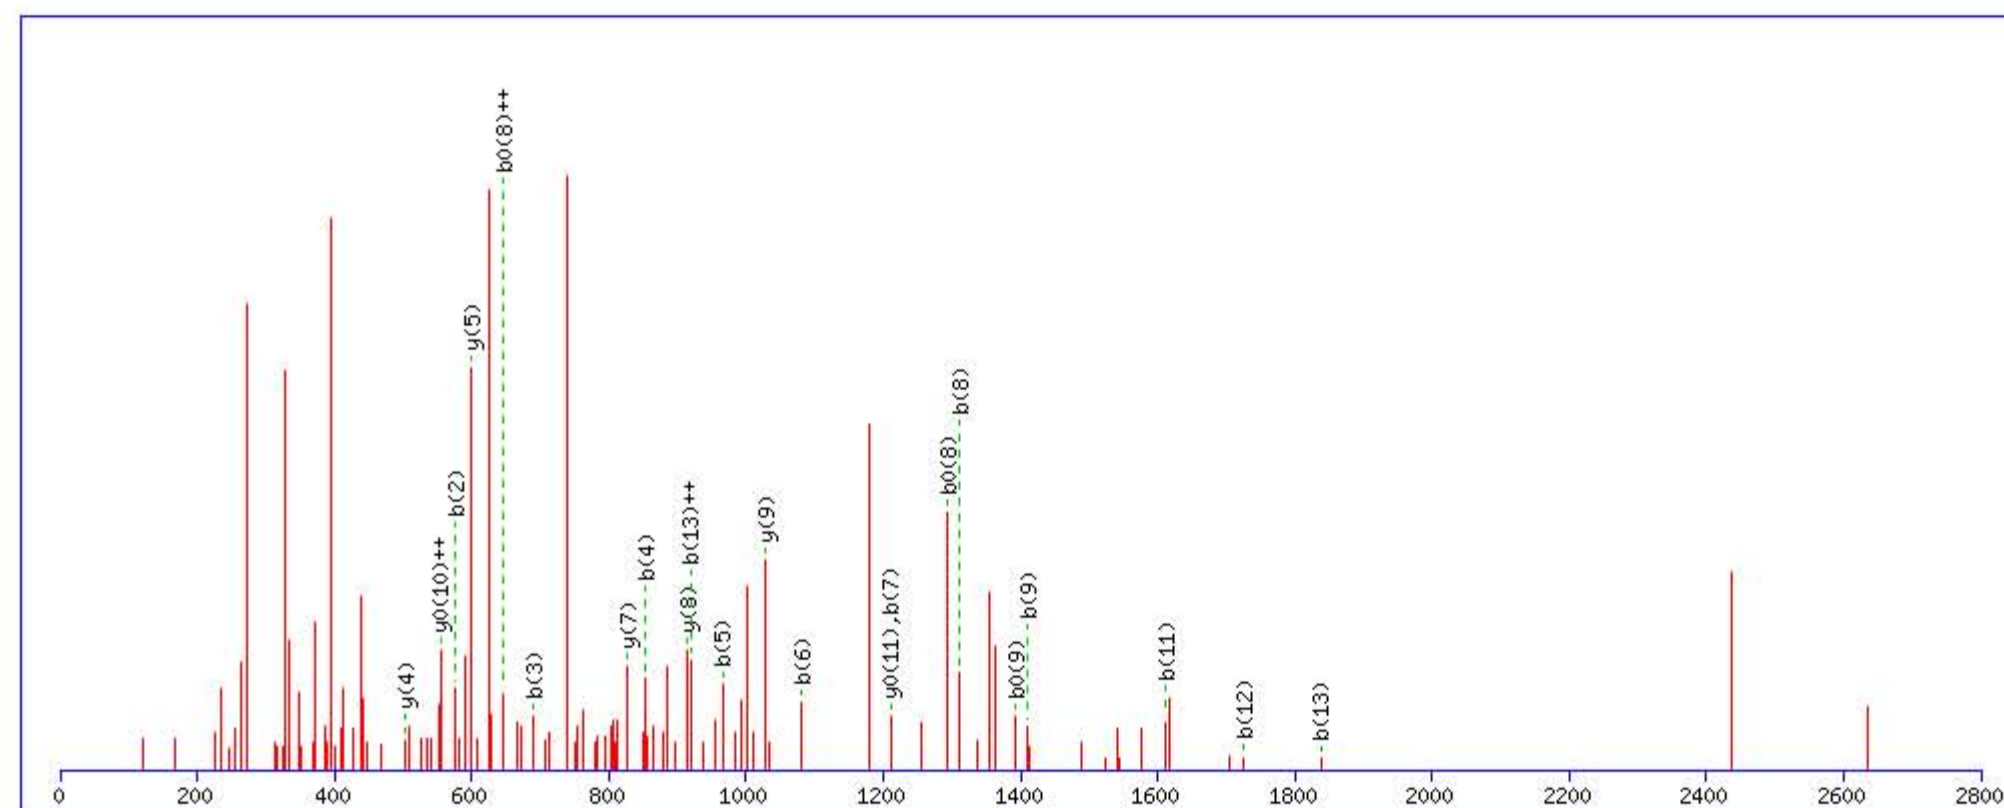

Monoisotopic mass of neutral peptide Mr(calc): 2437.242355

Fixed modifications: Carbamidomethyl (C) (apply to specified residues or termini only)

Variable modifications:

Q2 : Biotin:Thermo-21345 (Q)

Ions Score: 32 Expect: 0.02

Matches : 22/186 fragment ions using 66 most intense peaks [\(help\)](#)

| #  | b                  | b <sup>++</sup>   | b <sup>*</sup> | b <sup>+++</sup> | b <sup>0</sup>     | b <sup>0++</sup>  | Seq. | y                  | y <sup>++</sup> | y <sup>*</sup> | y <sup>+++</sup> | y <sup>0</sup>     | y <sup>0++</sup>  | #  |
|----|--------------------|-------------------|----------------|------------------|--------------------|-------------------|------|--------------------|-----------------|----------------|------------------|--------------------|-------------------|----|
| 1  | 138.066188         | 69.536732         |                |                  |                    |                   | H    |                    |                 |                |                  |                    |                   | 18 |
| 2  | <b>577.291514</b>  | 289.149395        | 560.264965     | 280.636121       |                    |                   | Q    | 2301.190744        | 1151.099010     | 2284.164195    | 1142.585735      | 2283.180179        | 1142.093727       | 17 |
| 3  | <b>690.375578</b>  | 345.691427        | 673.349029     | 337.178153       |                    |                   | L    | 1861.965418        | 931.486347      | 1844.938869    | 922.973073       | 1843.954853        | 922.481065        | 16 |
| 4  | <b>853.438907</b>  | 427.223092        | 836.412358     | 418.709817       |                    |                   | Y    | 1748.881354        | 874.944315      | 1731.854805    | 866.431041       | 1730.870789        | 865.939033        | 15 |
| 5  | <b>966.522971</b>  | 483.765124        | 949.496422     | 475.251849       |                    |                   | I    | 1585.818025        | 793.412651      | 1568.791476    | 784.899376       | 1567.807460        | 784.407368        | 14 |
| 6  | <b>1081.549914</b> | 541.278595        | 1064.523365    | 532.765321       | 1063.539349        | 532.273312        | D    | 1472.733961        | 736.870619      | 1455.707412    | 728.357344       | 1454.723396        | 727.865336        | 13 |
| 7  | <b>1210.592507</b> | 605.799892        | 1193.565958    | 597.286617       | 1192.581942        | 596.794609        | E    | 1357.707018        | 679.357147      | 1340.680469    | 670.843873       | 1339.696453        | 670.351865        | 12 |
| 8  | <b>1311.640186</b> | 656.323731        | 1294.613637    | 647.810457       | <b>1293.629621</b> | <b>647.318449</b> | T    | 1228.664425        | 614.835851      | 1211.637876    | 606.322576       | <b>1210.653860</b> | 605.830568        | 11 |
| 9  | <b>1410.708600</b> | 705.857938        | 1393.682051    | 697.344664       | <b>1392.698035</b> | 696.852656        | V    | 1127.616746        | 564.312011      | 1110.590197    | 555.798737       | 1109.606181        | <b>555.306729</b> | 10 |
| 10 | 1524.751527        | 762.879402        | 1507.724978    | 754.366127       | 1506.740962        | 753.874119        | N    | <b>1028.548332</b> | 514.777804      | 1011.521783    | 506.264530       | 1010.537767        | 505.772522        | 9  |
| 11 | <b>1611.783555</b> | 806.395416        | 1594.757006    | 797.882141       | 1593.772990        | 797.390133        | S    | <b>914.505405</b>  | 457.756341      | 897.478856     | 449.243066       | 896.494840         | 448.751058        | 8  |
| 12 | <b>1725.826482</b> | 863.416879        | 1708.799933    | 854.903605       | 1707.815917        | 854.411597        | N    | <b>827.473377</b>  | 414.240327      | 810.446828     | 405.727052       | 809.462812         | 405.235044        | 7  |
| 13 | <b>1838.910546</b> | <b>919.958911</b> | 1821.883997    | 911.445637       | 1820.899981        | 910.953629        | I    | 713.430450         | 357.218863      | 696.403901     | 348.705589       | 695.419885         | 348.213581        | 6  |
| 14 | 1935.963310        | 968.485293        | 1918.936761    | 959.972019       | 1917.952745        | 959.480011        | P    | <b>600.346386</b>  | 300.676831      | 583.319837     | 292.163557       | 582.335821         | 291.671549        | 5  |
| 15 | 2037.010989        | 1019.009133       | 2019.984440    | 1010.495858      | 2019.000424        | 1010.003850       | T    | <b>503.293622</b>  | 252.150449      | 486.267073     | 243.637175       | 485.283057         | 243.145167        | 4  |
| 16 | 2151.053916        | 1076.030596       | 2134.027367    | 1067.517321      | 2133.043351        | 1067.025313       | N    | 402.245943         | 201.626610      | 385.219394     | 193.113335       |                    |                   | 3  |
| 17 | 2264.137980        | 1132.572628       | 2247.111431    | 1124.059353      | 2246.127415        | 1123.567345       | L    | 288.203016         | 144.605146      | 271.176467     | 136.091872       |                    |                   | 2  |
| 18 |                    |                   |                |                  |                    |                   | R    | 175.118952         | 88.063114       | 158.092403     | 79.549839        |                    |                   | 1  |

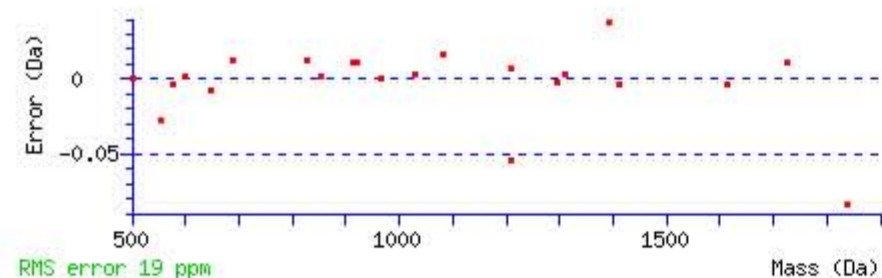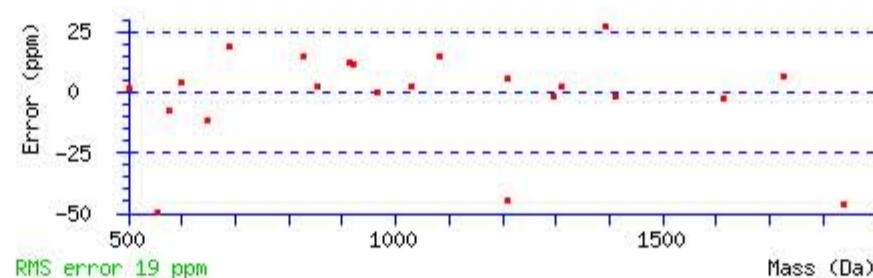

NCBI BLAST search of [HQLYIDETVNSNIPTNLR](#)

(Parameters: blastp, nr protein database, expect=20000, no filter, PAM30)

Other BLAST [web gateways](#)

All matches to this query

| Score | Mr(calc):   | Delta    | Sequence                           |
|-------|-------------|----------|------------------------------------|
| 31.5  | 2437.242355 | 0.001697 | <a href="#">HQLYIDETVNSNIPTNLR</a> |

Mascot: <http://www.matrixscience.com/>

# MASCOT Search Results

## Peptide View

MS/MS Fragmentation of **YLQEIYNSNNQK**

Found in **FIBG\_HUMAN**, Fibrinogen gamma chain OS=Homo sapiens GN=FGG PE=1 SV=3

Match to Query 36218: 1823.890962 from(608.970930,3+) rtinseconds(1875) index(45163)

Title: Locus:1.1.1.3366.6 File:"2013-07-02 CLN FXIII 180 min 3rd F 4.wiff"

Data file C:\Program Files (x86)\Matrix Science\Mascot Daemon\mgf9 FXIII 180 min 3rd\mascot\_daemon\_merge.mgf

Click mouse within plot area to zoom in by factor of two about that point

Or, Plot from  to  Da

Label all possible matches  Label matches used for scoring

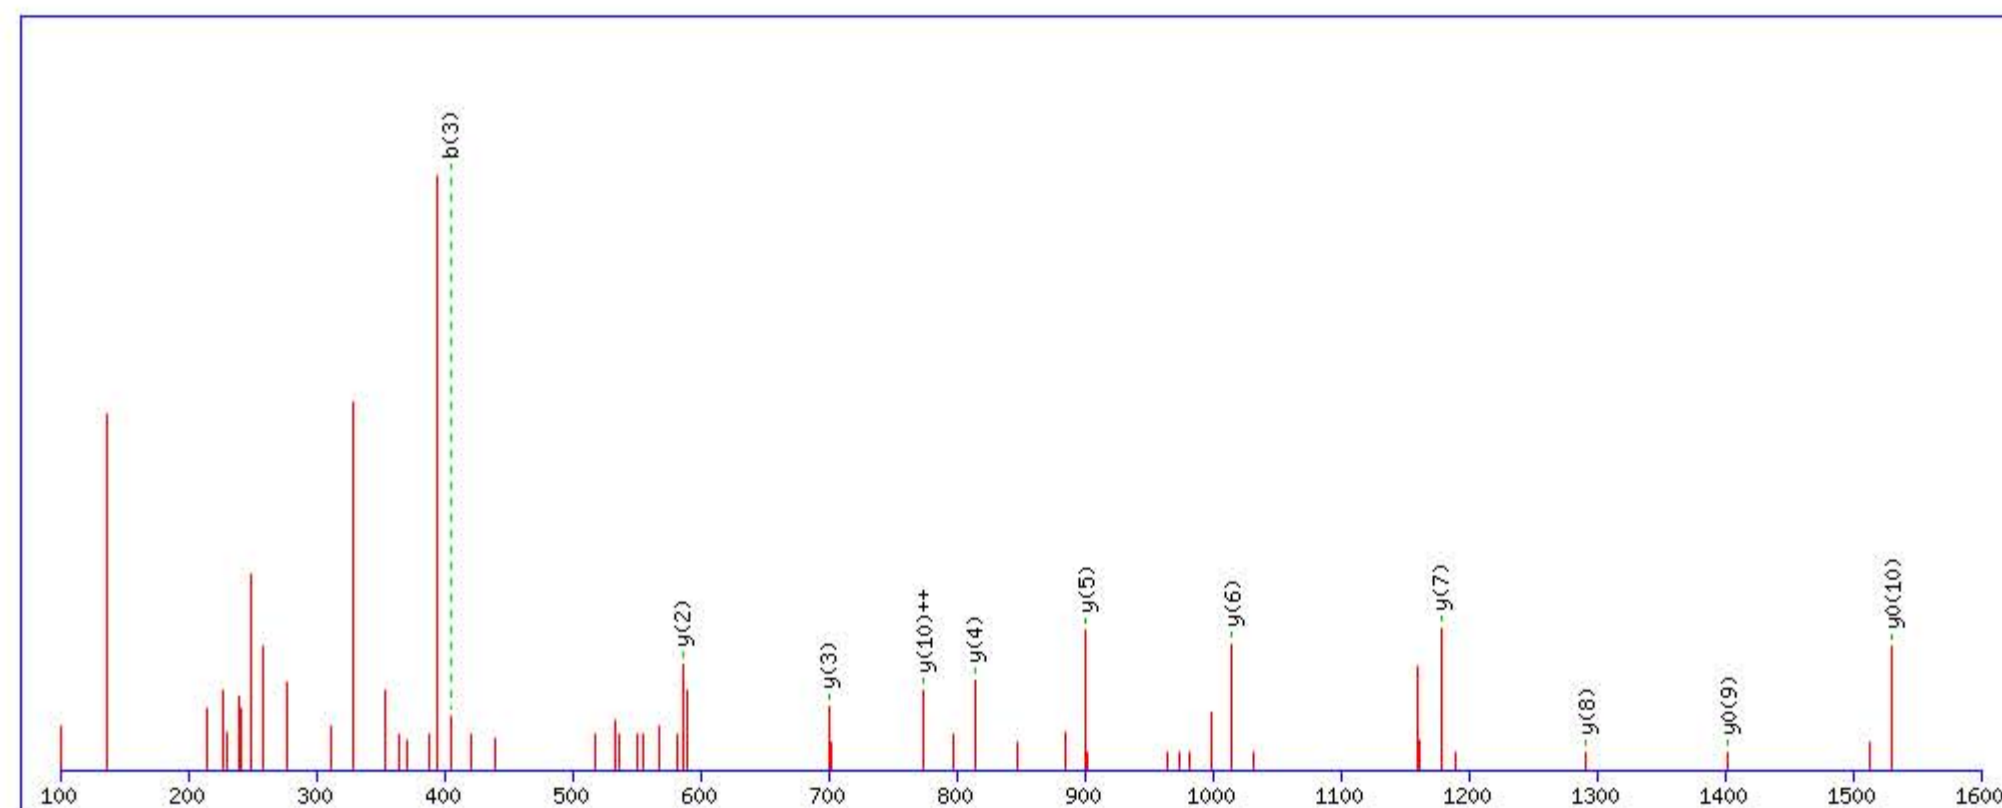

Monoisotopic mass of neutral peptide Mr(calc): 1823.887573

Fixed modifications: Carbamidomethyl (C) (apply to specified residues or termini only)

Variable modifications:

Q11 : Biotin:Thermo-21345 (Q)

Ions Score: 51 Expect: 0.00018

Matches : 11/114 fragment ions using 14 most intense peaks [\(help\)](#)

| #  | b                 | b <sup>++</sup> | b <sup>+</sup> | b <sup>*++</sup> | b <sup>0</sup> | b <sup>0++</sup> | Seq. | y                  | y <sup>++</sup>   | y <sup>+</sup> | y <sup>*++</sup> | y <sup>0</sup>     | y <sup>0++</sup> | #  |
|----|-------------------|-----------------|----------------|------------------|----------------|------------------|------|--------------------|-------------------|----------------|------------------|--------------------|------------------|----|
| 1  | 164.070605        | 82.538940       |                |                  |                |                  | Y    |                    |                   |                |                  |                    |                  | 12 |
| 2  | 277.154669        | 139.080973      |                |                  |                |                  | L    | 1661.831567        | 831.419422        | 1644.805018    | 822.906147       | 1643.821002        | 822.414139       | 11 |
| 3  | <b>405.213247</b> | 203.110262      | 388.186698     | 194.596987       |                |                  | Q    | 1548.747503        | <b>774.877390</b> | 1531.720954    | 766.364115       | <b>1530.736938</b> | 765.872107       | 10 |
| 4  | 534.255840        | 267.631558      | 517.229291     | 259.118284       | 516.245275     | 258.626276       | E    | 1420.688925        | 710.848100        | 1403.662376    | 702.334826       | <b>1402.678360</b> | 701.842818       | 9  |
| 5  | 647.339904        | 324.173590      | 630.313355     | 315.660316       | 629.329339     | 315.168308       | I    | <b>1291.646332</b> | 646.326804        | 1274.619783    | 637.813530       | 1273.635767        | 637.321522       | 8  |
| 6  | 810.403233        | 405.705255      | 793.376684     | 397.191980       | 792.392668     | 396.699972       | Y    | <b>1178.562268</b> | 589.784772        | 1161.535719    | 581.271498       | 1160.551703        | 580.779489       | 7  |
| 7  | 924.446160        | 462.726718      | 907.419611     | 454.213443       | 906.435595     | 453.721435       | N    | <b>1015.498939</b> | 508.253108        | 998.472390     | 499.739833       | 997.488374         | 499.247825       | 6  |
| 8  | 1011.478188       | 506.242732      | 994.451639     | 497.729457       | 993.467623     | 497.237449       | S    | <b>901.456012</b>  | 451.231644        | 884.429463     | 442.718370       | 883.445447         | 442.226362       | 5  |
| 9  | 1125.521115       | 563.264196      | 1108.494566    | 554.750921       | 1107.510550    | 554.258913       | N    | <b>814.423984</b>  | 407.715630        | 797.397435     | 399.202356       |                    |                  | 4  |
| 10 | 1239.564042       | 620.285659      | 1222.537493    | 611.772385       | 1221.553477    | 611.280376       | N    | <b>700.381057</b>  | 350.694167        | 683.354508     | 342.180892       |                    |                  | 3  |
| 11 | 1678.789368       | 839.898322      | 1661.762819    | 831.385048       | 1660.778803    | 830.893039       | Q    | <b>586.338130</b>  | 293.672703        | 569.311581     | 285.159429       |                    |                  | 2  |
| 12 |                   |                 |                |                  |                |                  | K    | 147.112804         | 74.060040         | 130.086255     | 65.546765        |                    |                  | 1  |

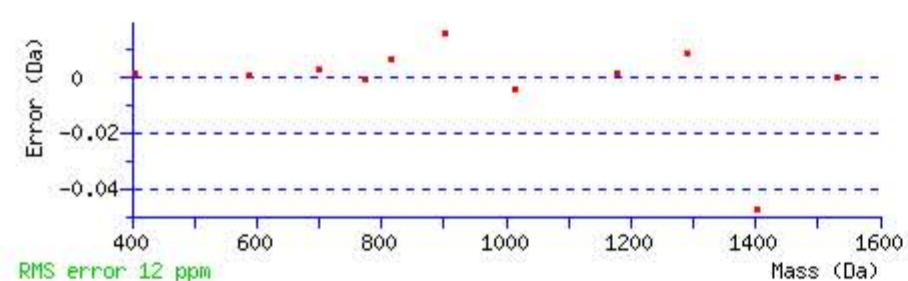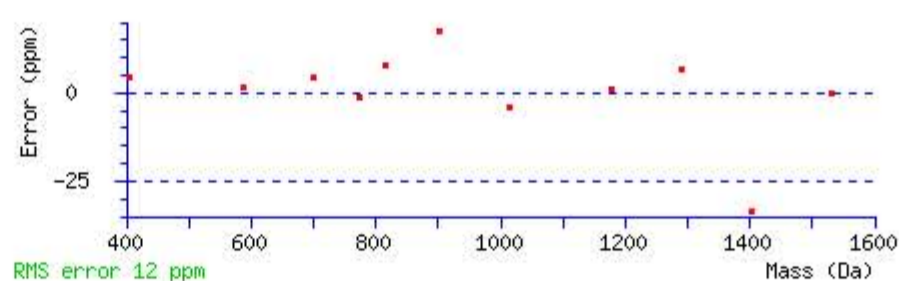

NCBI BLAST search of [YLQEIYNSNNQK](#)

(Parameters: blastp, nr protein database, expect=20000, no filter, PAM30)

Other BLAST [web gateways](#)

All matches to this query

| Score | Mr(calc):   | Delta    | Sequence                     |
|-------|-------------|----------|------------------------------|
| 50.8  | 1823.887573 | 0.003389 | <a href="#">YLQEIYNSNNQK</a> |

Mascot: <http://www.matrixscience.com/>

# MASCOT SEARCH RESULTS

## Peptide View

MS/MS Fragmentation of **LTIGEGQQHHLGGAK**

Found in **FIBG\_HUMAN**, Fibrinogen gamma chain OS=Homo sapiens GN=FGG PE=1 SV=3

Match to Query 36849: 1855.960428 from(928.987490,2+) rtinseconds(1562) index(16251)

Title: Locus:1.1.1.3109.24 File:"2013-07-02 CLN FXIII 180 min 3rd F 2.wiff"

Data file C:\Program Files (x86)\Matrix Science\Mascot Daemon\mgf\9 FXIII 180 min 3rd\mascot\_daemon\_merge.mgf

Click mouse within plot area to zoom in by factor of two about that point

Or, Plot from  to  Da

Label all possible matches  Label matches used for scoring

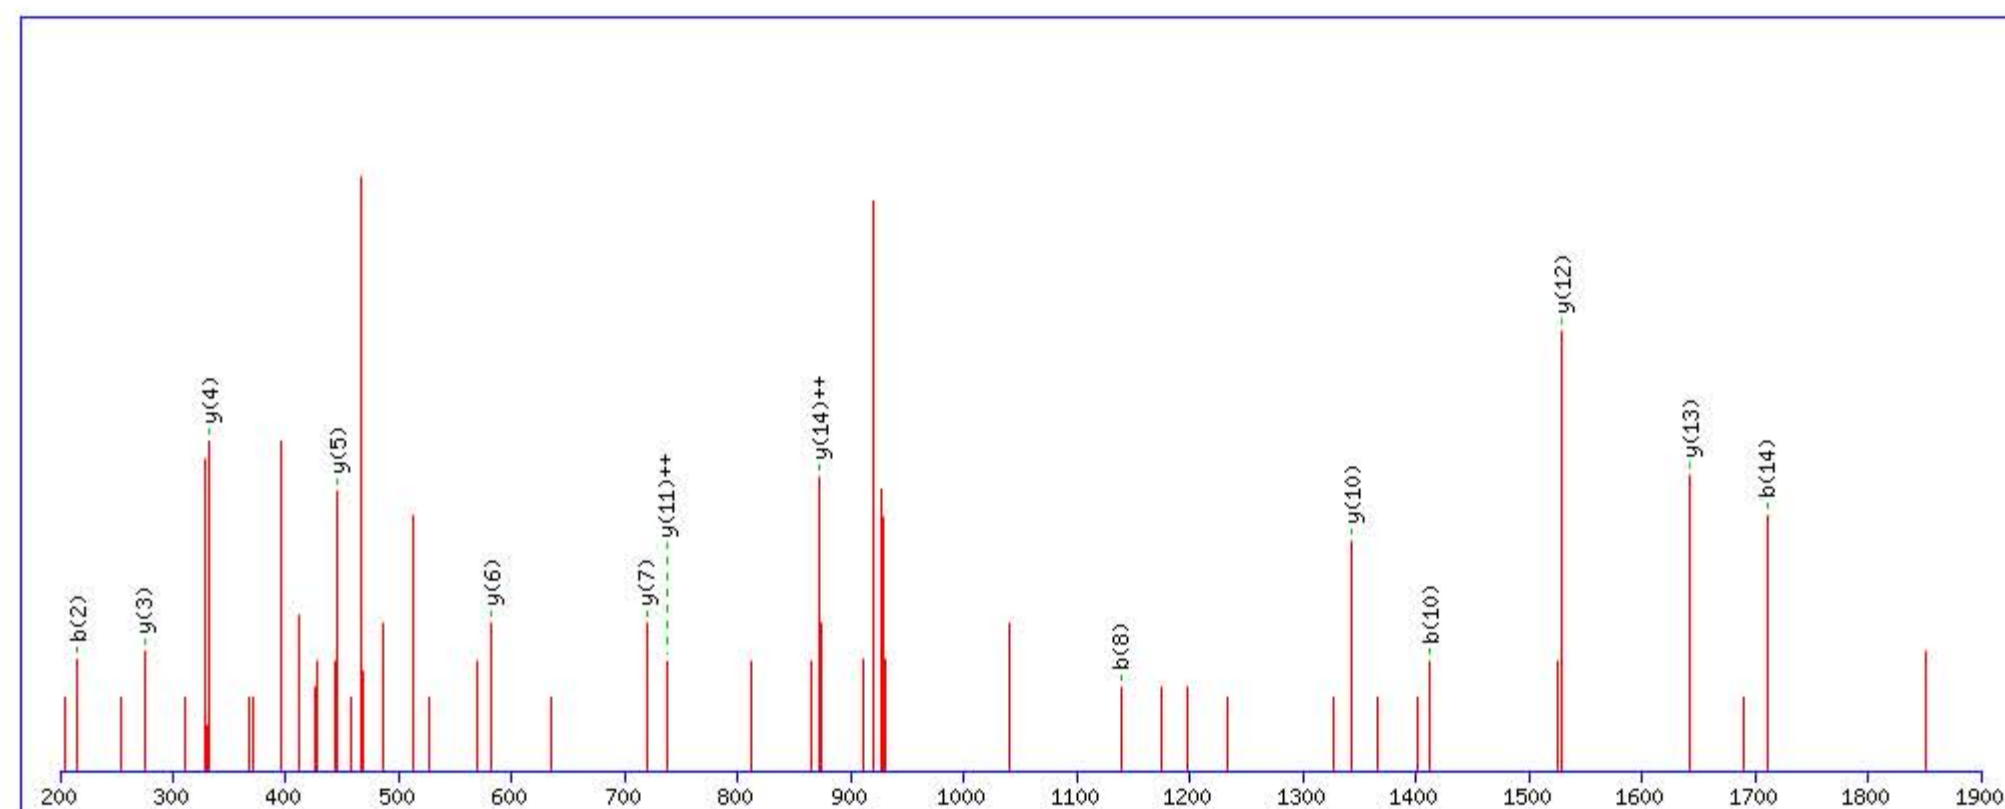

Monoisotopic mass of neutral peptide Mr(calc): 1855.972687

Fixed modifications: Carbamidomethyl (C) (apply to specified residues or termini only)

Variable modifications:

Q8 : Biotin:Thermo-21345 (Q)

Ions Score: 44 Expect: 0.00011

Matches : 14/134 fragment ions using 28 most intense peaks [\(help\)](#)

| #  | b                  | b <sup>++</sup> | b <sup>*</sup> | b <sup>*++</sup> | b <sup>0</sup> | b <sup>0++</sup> | Seq. | y                  | y <sup>++</sup>   | y <sup>*</sup> | y <sup>*++</sup> | y <sup>0</sup> | y <sup>0++</sup> | #  |
|----|--------------------|-----------------|----------------|------------------|----------------|------------------|------|--------------------|-------------------|----------------|------------------|----------------|------------------|----|
| 1  | 114.091340         | 57.549308       |                |                  |                |                  | L    |                    |                   |                |                  |                |                  | 15 |
| 2  | <b>215.139019</b>  | 108.073147      |                |                  | 197.128454     | 99.067865        | T    | 1743.895902        | <b>872.451589</b> | 1726.869353    | 863.938314       | 1725.885337    | 863.446306       | 14 |
| 3  | 328.223083         | 164.615179      |                |                  | 310.212518     | 155.609897       | I    | <b>1642.848223</b> | 821.927749        | 1625.821674    | 813.414475       | 1624.837658    | 812.922467       | 13 |
| 4  | 385.244547         | 193.125911      |                |                  | 367.233982     | 184.120629       | G    | <b>1529.764159</b> | 765.385717        | 1512.737610    | 756.872443       | 1511.753594    | 756.380435       | 12 |
| 5  | 514.287140         | 257.647208      |                |                  | 496.276575     | 248.641926       | E    | 1472.742695        | <b>736.874985</b> | 1455.716146    | 728.361711       | 1454.732130    | 727.869703       | 11 |
| 6  | 571.308604         | 286.157940      |                |                  | 553.298039     | 277.152658       | G    | <b>1343.700102</b> | 672.353689        | 1326.673553    | 663.840414       |                |                  | 10 |
| 7  | 699.367182         | 350.187229      | 682.340633     | 341.673955       | 681.356617     | 341.181947       | Q    | 1286.678638        | 643.842957        | 1269.652089    | 635.329682       |                |                  | 9  |
| 8  | <b>1138.592508</b> | 569.799892      | 1121.565959    | 561.286618       | 1120.581943    | 560.794609       | Q    | 1158.620060        | 579.813668        | 1141.593511    | 571.300393       |                |                  | 8  |
| 9  | 1275.651420        | 638.329348      | 1258.624871    | 629.816074       | 1257.640855    | 629.324065       | H    | <b>719.394734</b>  | 360.201005        | 702.368185     | 351.687730       |                |                  | 7  |
| 10 | <b>1412.710332</b> | 706.858804      | 1395.683783    | 698.345530       | 1394.699767    | 697.853521       | H    | <b>582.335822</b>  | 291.671549        | 565.309273     | 283.158274       |                |                  | 6  |
| 11 | 1525.794396        | 763.400836      | 1508.767847    | 754.887561       | 1507.783831    | 754.395553       | L    | <b>445.276910</b>  | 223.142093        | 428.250361     | 214.628818       |                |                  | 5  |
| 12 | 1582.815860        | 791.911568      | 1565.789311    | 783.398293       | 1564.805295    | 782.906285       | G    | <b>332.192846</b>  | 166.600061        | 315.166297     | 158.086786       |                |                  | 4  |
| 13 | 1639.837324        | 820.422300      | 1622.810775    | 811.909025       | 1621.826759    | 811.417017       | G    | <b>275.171382</b>  | 138.089329        | 258.144833     | 129.576054       |                |                  | 3  |
| 14 | <b>1710.874438</b> | 855.940857      | 1693.847889    | 847.427582       | 1692.863873    | 846.935574       | A    | 218.149918         | 109.578597        | 201.123369     | 101.065322       |                |                  | 2  |
| 15 |                    |                 |                |                  |                |                  | K    | 147.112804         | 74.060040         | 130.086255     | 65.546765        |                |                  | 1  |

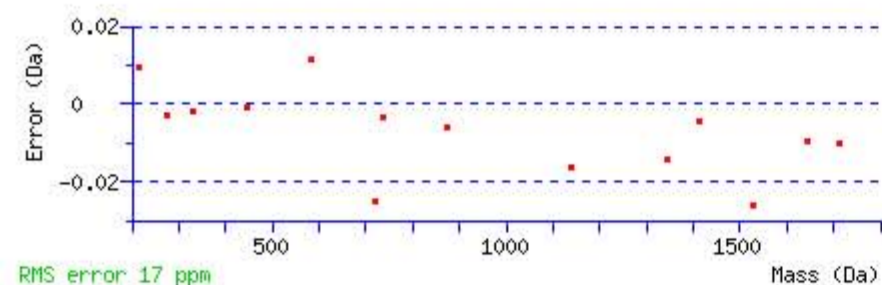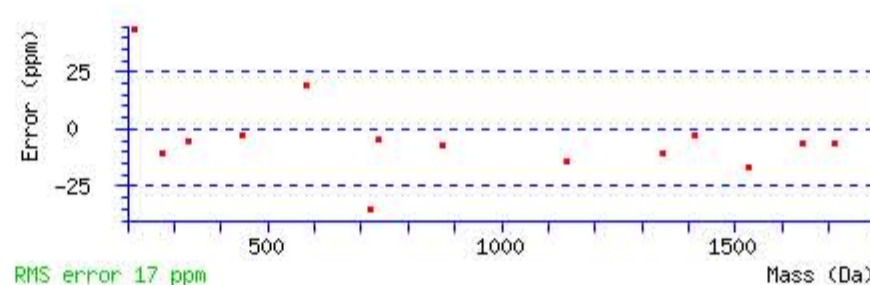

NCBI BLAST search of **LTIGEGQQHHLGGAK**

(Parameters: blastp, nr protein database, expect=20000, no filter, PAM30)

Other BLAST [web gateways](#)

All matches to this query

| Score | Mr(calc):   | Delta     | Sequence                        |
|-------|-------------|-----------|---------------------------------|
| 43.8  | 1855.972687 | -0.012259 | <a href="#">LTIGEGQQHHLGGAK</a> |
| 43.8  | 1855.972687 | -0.012259 | <a href="#">LTIGEGQQHHLGGAK</a> |
| 1.4   | 1855.935806 | 0.024622  | <a href="#">DSEIMQQKQK</a>      |

# MASCOT Search Results

## Peptide View

MS/MS Fragmentation of **LTIGEGQQHHLGGAK**

Found in **FIBG\_HUMAN**, Fibrinogen gamma chain OS=Homo sapiens GN=FGG PE=1 SV=3

Match to Query 36854: 1855.966708 from(928.990630,2+) rtinseconds(1588) index(2526)

Title: Locus:1.1.1.3072.21 File:"2013-07-02 CLN FXIII 180 min 3rd F 1.wiff"

Data file C:\Program Files (x86)\Matrix Science\Mascot Daemon\mgf\9 FXIII 180 min 3rd\mascot\_daemon\_merge.mgf

Click mouse within plot area to zoom in by factor of two about that point

Or, Plot from  to  Da

Label all possible matches  Label matches used for scoring

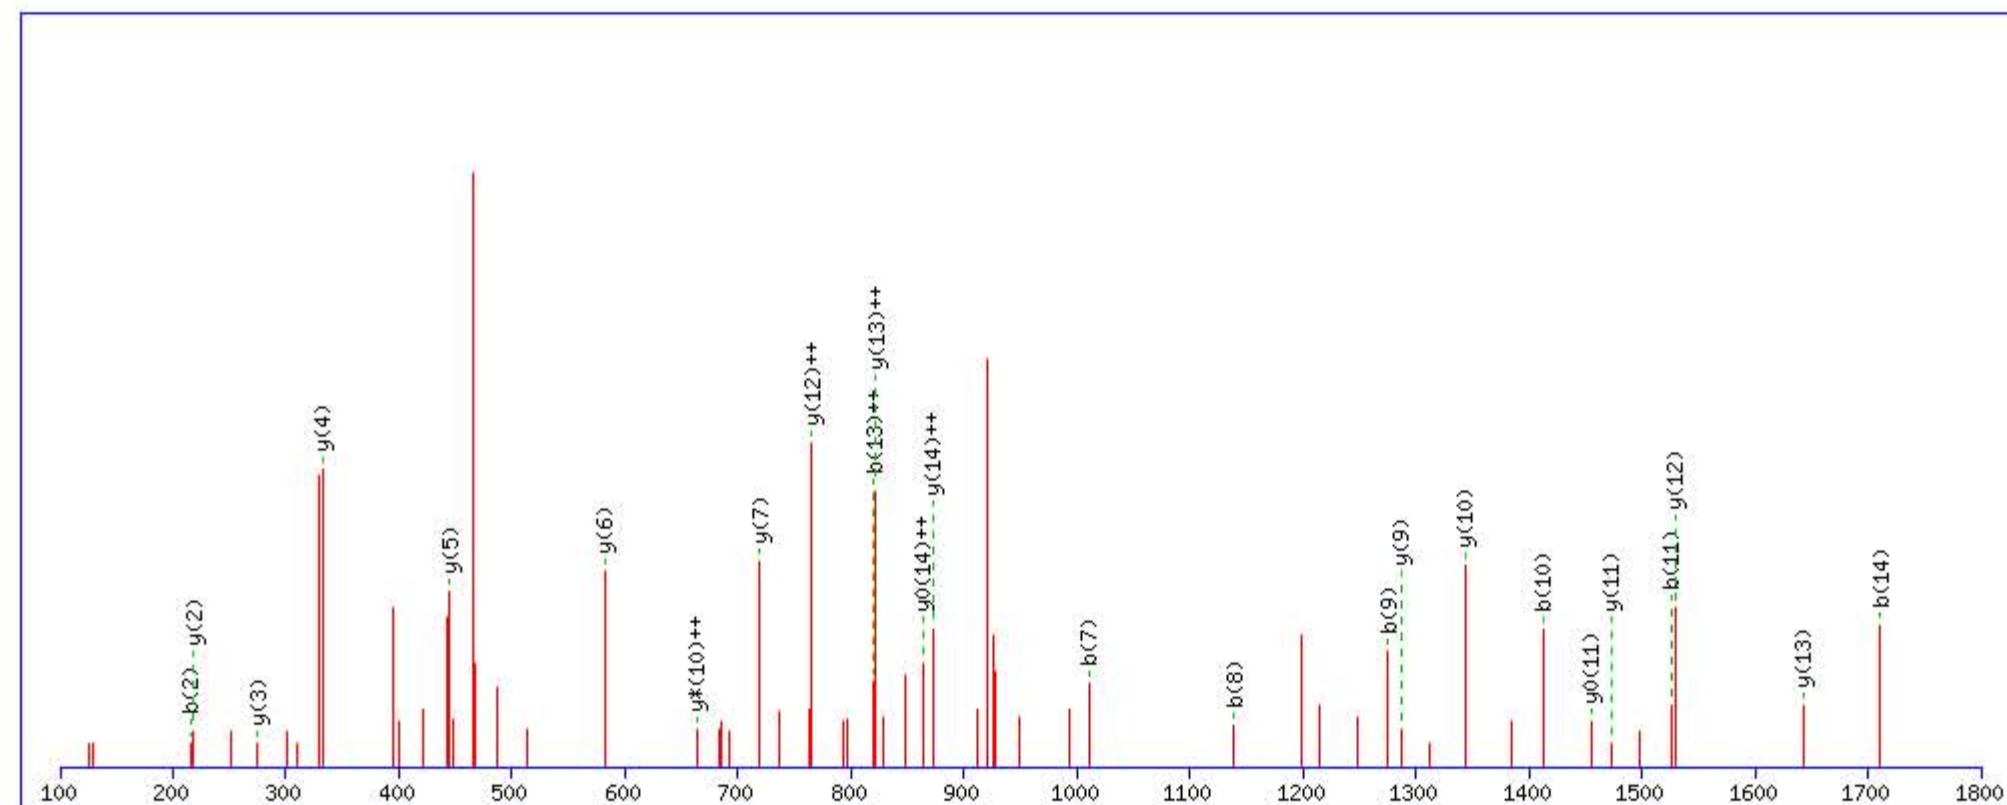

Monoisotopic mass of neutral peptide Mr(calc): 1855.972687

Fixed modifications: Carbamidomethyl (C) (apply to specified residues or termini only)

Variable modifications:

Q7 : Biotin:Thermo-21345 (Q)

Ions Score: 75 Expect: 2e-007

Matches : 25/134 fragment ions using 41 most intense peaks [\(help\)](#)

| #  | b                  | b <sup>++</sup>   | b <sup>*</sup> | b <sup>*++</sup> | b <sup>0</sup> | b <sup>0++</sup> | Seq. | y                  | y <sup>++</sup>   | y <sup>*</sup> | y <sup>*++</sup>  | y <sup>0</sup>     | y <sup>0++</sup>  | #  |
|----|--------------------|-------------------|----------------|------------------|----------------|------------------|------|--------------------|-------------------|----------------|-------------------|--------------------|-------------------|----|
| 1  | 114.091340         | 57.549308         |                |                  |                |                  | L    |                    |                   |                |                   |                    |                   | 15 |
| 2  | <b>215.139019</b>  | 108.073147        |                |                  | 197.128454     | 99.067865        | T    | 1743.895902        | <b>872.451589</b> | 1726.869353    | 863.938314        | 1725.885337        | <b>863.446306</b> | 14 |
| 3  | 328.223083         | 164.615179        |                |                  | 310.212518     | 155.609897       | I    | <b>1642.848223</b> | <b>821.927749</b> | 1625.821674    | 813.414475        | 1624.837658        | 812.922467        | 13 |
| 4  | 385.244547         | 193.125911        |                |                  | 367.233982     | 184.120629       | G    | <b>1529.764159</b> | <b>765.385717</b> | 1512.737610    | 756.872443        | 1511.753594        | 756.380435        | 12 |
| 5  | 514.287140         | 257.647208        |                |                  | 496.276575     | 248.641926       | E    | <b>1472.742695</b> | 736.874985        | 1455.716146    | 728.361711        | <b>1454.732130</b> | 727.869703        | 11 |
| 6  | 571.308604         | 286.157940        |                |                  | 553.298039     | 277.152658       | G    | <b>1343.700102</b> | 672.353689        | 1326.673553    | <b>663.840414</b> |                    |                   | 10 |
| 7  | <b>1010.533930</b> | 505.770603        | 993.507381     | 497.257329       | 992.523365     | 496.765321       | Q    | <b>1286.678638</b> | 643.842957        | 1269.652089    | 635.329682        |                    |                   | 9  |
| 8  | <b>1138.592508</b> | 569.799892        | 1121.565959    | 561.286618       | 1120.581943    | 560.794609       | Q    | 847.453312         | 424.230294        | 830.426763     | 415.717019        |                    |                   | 8  |
| 9  | <b>1275.651420</b> | 638.329348        | 1258.624871    | 629.816074       | 1257.640855    | 629.324065       | H    | <b>719.394734</b>  | 360.201005        | 702.368185     | 351.687730        |                    |                   | 7  |
| 10 | <b>1412.710332</b> | 706.858804        | 1395.683783    | 698.345530       | 1394.699767    | 697.853521       | H    | <b>582.335822</b>  | 291.671549        | 565.309273     | 283.158274        |                    |                   | 6  |
| 11 | <b>1525.794396</b> | 763.400836        | 1508.767847    | 754.887561       | 1507.783831    | 754.395553       | L    | <b>445.276910</b>  | 223.142093        | 428.250361     | 214.628818        |                    |                   | 5  |
| 12 | 1582.815860        | 791.911568        | 1565.789311    | 783.398293       | 1564.805295    | 782.906285       | G    | <b>332.192846</b>  | 166.600061        | 315.166297     | 158.086786        |                    |                   | 4  |
| 13 | 1639.837324        | <b>820.422300</b> | 1622.810775    | 811.909025       | 1621.826759    | 811.417017       | G    | <b>275.171382</b>  | 138.089329        | 258.144833     | 129.576054        |                    |                   | 3  |
| 14 | <b>1710.874438</b> | 855.940857        | 1693.847889    | 847.427582       | 1692.863873    | 846.935574       | A    | <b>218.149918</b>  | 109.578597        | 201.123369     | 101.065322        |                    |                   | 2  |
| 15 |                    |                   |                |                  |                |                  | K    | 147.112804         | 74.060040         | 130.086255     | 65.546765         |                    |                   | 1  |

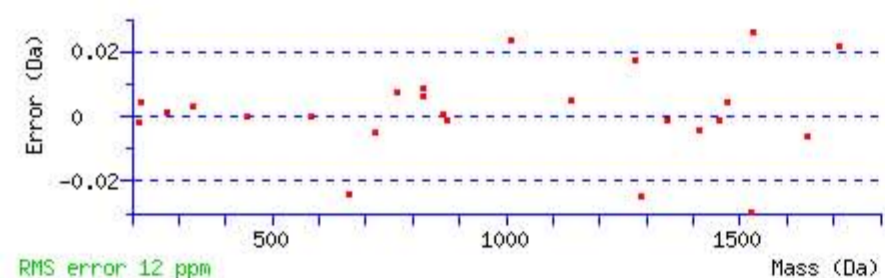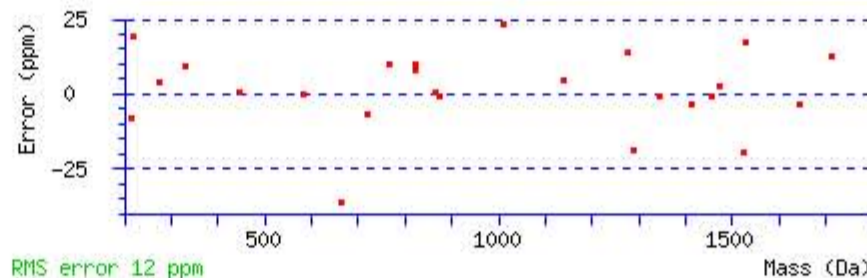

NCBI BLAST search of **LTIGEGQQHHLGGAK**

(Parameters: blastp, nr protein database, expect=20000, no filter, PAM30)

Other BLAST [web gateways](#)

All matches to this query

| Score | Mr(calc):   | Delta     | Sequence                        |
|-------|-------------|-----------|---------------------------------|
| 75.1  | 1855.972687 | -0.005979 | <a href="#">LTIGEGQQHHLGGAK</a> |
| 73.1  | 1855.972687 | -0.005979 | <a href="#">LTIGEGQQHHLGGAK</a> |
| 3.7   | 1855.989944 | -0.023236 | <a href="#">MLSITPSQLENGKK</a>  |

Mascot: <http://www.matrixscience.com/>



# MASCOT Search Results

## Peptide View

MS/MS Fragmentation of **LTIGEGQQHHLGGAK**

Found in **FIBG\_HUMAN**, Fibrinogen gamma chain OS=Homo sapiens GN=FGG PE=1 SV=3

Match to Query 36855: 1855.967502 from(619.663110,3+) rtinseconds(1569) index(43298)

Title: Locus:1.1.1.3259.13 File:"2013-07-02 CLN FXIII 180 min 3rd F 4.wiff"

Data file C:\Program Files (x86)\Matrix Science\Mascot Daemon\mgf\9 FXIII 180 min 3rd\mascot\_daemon\_merge.mgf

Click mouse within plot area to zoom in by factor of two about that point

Or, Plot from  to  Da

Label all possible matches  Label matches used for scoring

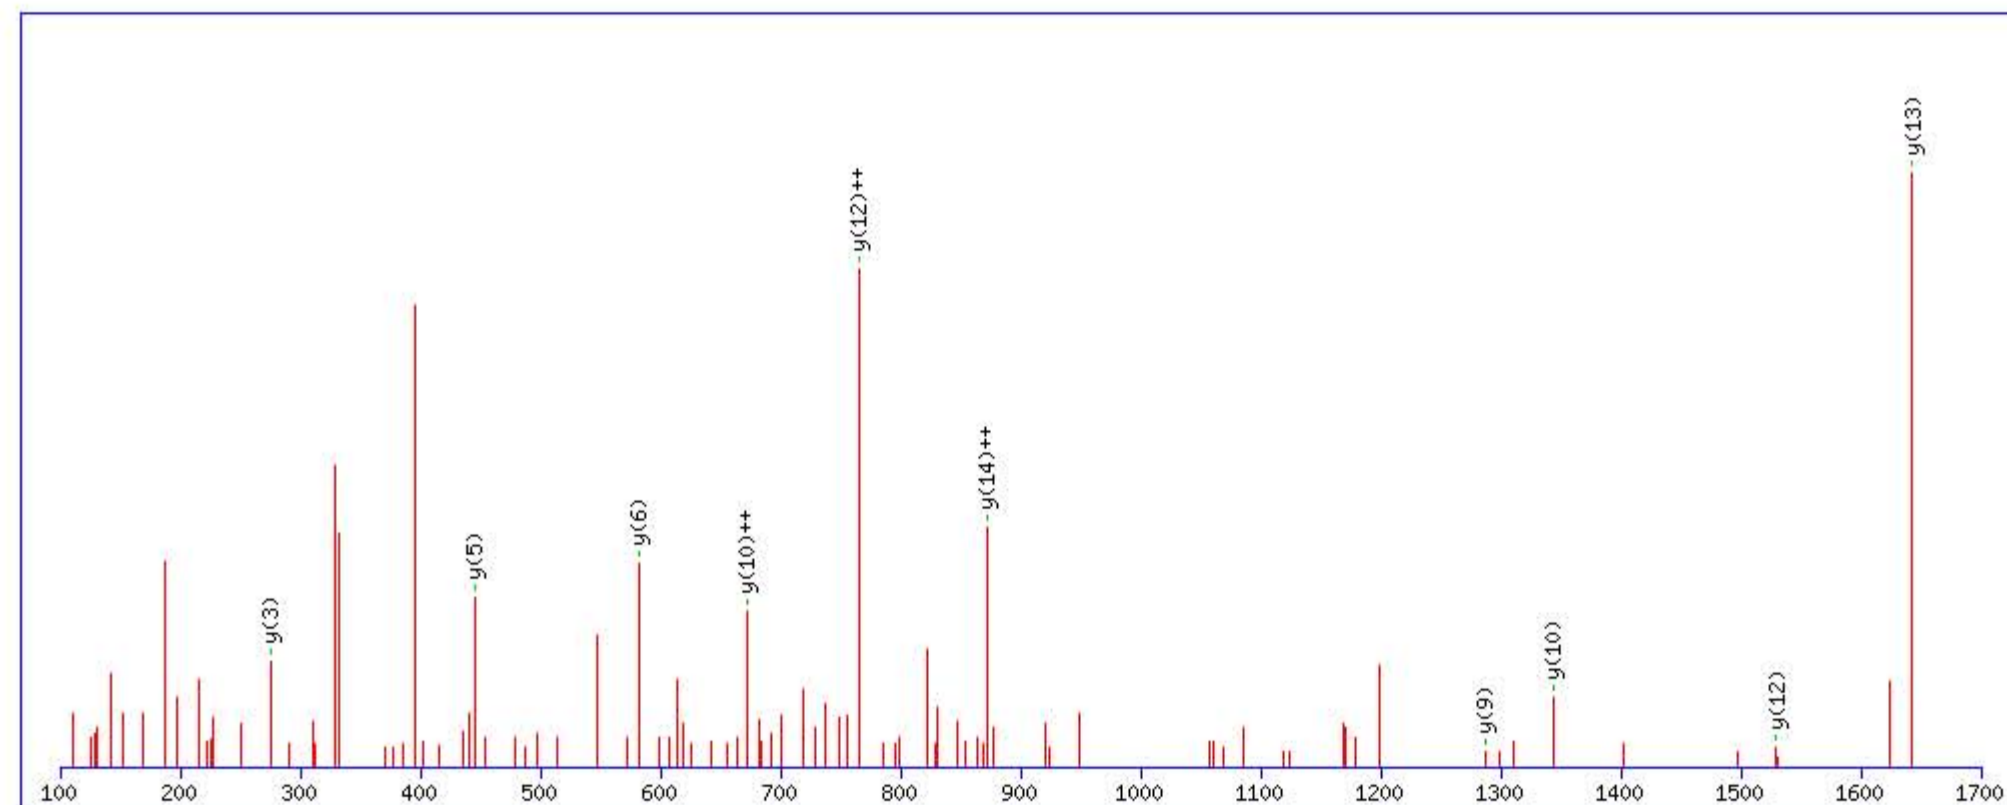

Monoisotopic mass of neutral peptide Mr(calc): 1855.972687

Fixed modifications: Carbamidomethyl (C) (apply to specified residues or termini only)

Variable modifications:

Q8 : Biotin:Thermo-21345 (Q)

Ions Score: 44 Expect: 0.00029

Matches : 10/134 fragment ions using 16 most intense peaks [\(help\)](#)

| #  | b           | b <sup>++</sup> | b <sup>*</sup> | b <sup>*++</sup> | b <sup>0</sup> | b <sup>0++</sup> | Seq. | y           | y <sup>++</sup> | y <sup>*</sup> | y <sup>*++</sup> | y <sup>0</sup> | y <sup>0++</sup> | #  |
|----|-------------|-----------------|----------------|------------------|----------------|------------------|------|-------------|-----------------|----------------|------------------|----------------|------------------|----|
| 1  | 114.091340  | 57.549308       |                |                  |                |                  | L    |             |                 |                |                  |                |                  | 15 |
| 2  | 215.139019  | 108.073147      |                |                  | 197.128454     | 99.067865        | T    | 1743.895902 | 872.451589      | 1726.869353    | 863.938314       | 1725.885337    | 863.446306       | 14 |
| 3  | 328.223083  | 164.615179      |                |                  | 310.212518     | 155.609897       | I    | 1642.848223 | 821.927749      | 1625.821674    | 813.414475       | 1624.837658    | 812.922467       | 13 |
| 4  | 385.244547  | 193.125911      |                |                  | 367.233982     | 184.120629       | G    | 1529.764159 | 765.385717      | 1512.737610    | 756.872443       | 1511.753594    | 756.380435       | 12 |
| 5  | 514.287140  | 257.647208      |                |                  | 496.276575     | 248.641926       | E    | 1472.742695 | 736.874985      | 1455.716146    | 728.361711       | 1454.732130    | 727.869703       | 11 |
| 6  | 571.308604  | 286.157940      |                |                  | 553.298039     | 277.152658       | G    | 1343.700102 | 672.353689      | 1326.673553    | 663.840414       |                |                  | 10 |
| 7  | 699.367182  | 350.187229      | 682.340633     | 341.673955       | 681.356617     | 341.181947       | Q    | 1286.678638 | 643.842957      | 1269.652089    | 635.329682       |                |                  | 9  |
| 8  | 1138.592508 | 569.799892      | 1121.565959    | 561.286618       | 1120.581943    | 560.794609       | Q    | 1158.620060 | 579.813668      | 1141.593511    | 571.300393       |                |                  | 8  |
| 9  | 1275.651420 | 638.329348      | 1258.624871    | 629.816074       | 1257.640855    | 629.324065       | H    | 719.394734  | 360.201005      | 702.368185     | 351.687730       |                |                  | 7  |
| 10 | 1412.710332 | 706.858804      | 1395.683783    | 698.345530       | 1394.699767    | 697.853521       | H    | 582.335822  | 291.671549      | 565.309273     | 283.158274       |                |                  | 6  |
| 11 | 1525.794396 | 763.400836      | 1508.767847    | 754.887561       | 1507.783831    | 754.395553       | L    | 445.276910  | 223.142093      | 428.250361     | 214.628818       |                |                  | 5  |
| 12 | 1582.815860 | 791.911568      | 1565.789311    | 783.398293       | 1564.805295    | 782.906285       | G    | 332.192846  | 166.600061      | 315.166297     | 158.086786       |                |                  | 4  |
| 13 | 1639.837324 | 820.422300      | 1622.810775    | 811.909025       | 1621.826759    | 811.417017       | G    | 275.171382  | 138.089329      | 258.144833     | 129.576054       |                |                  | 3  |
| 14 | 1710.874438 | 855.940857      | 1693.847889    | 847.427582       | 1692.863873    | 846.935574       | A    | 218.149918  | 109.578597      | 201.123369     | 101.065322       |                |                  | 2  |
| 15 |             |                 |                |                  |                |                  | K    | 147.112804  | 74.060040       | 130.086255     | 65.546765        |                |                  | 1  |

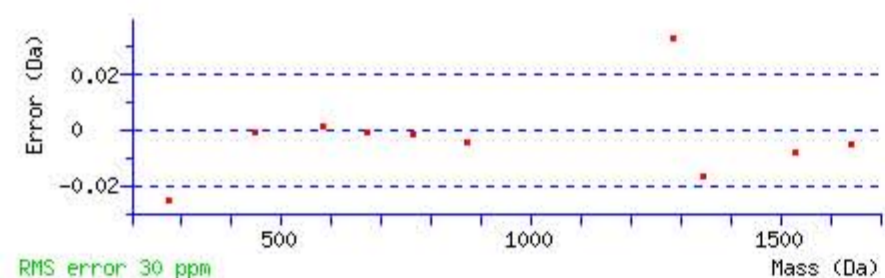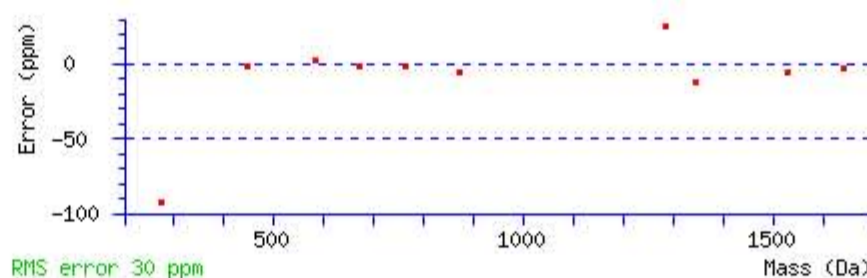

NCBI BLAST search of **LTIGEGQQHHLGGAK**

(Parameters: blastp, nr protein database, expect=20000, no filter, PAM30)

Other BLAST [web gateways](#)

All matches to this query

| Score | Mr(calc):   | Delta     | Sequence                          |
|-------|-------------|-----------|-----------------------------------|
| 43.6  | 1855.972687 | -0.005185 | <a href="#">LTIGEGQQHHLGGAK</a>   |
| 43.6  | 1855.972687 | -0.005185 | <a href="#">LTIGEGQQHHLGGAK</a>   |
| 5.9   | 1855.979202 | -0.011700 | <a href="#">ITIVENVGSVEGLAYHR</a> |

Mascot: <http://www.matrixscience.com/>

# MASCOT Search Results

## Peptide View

MS/MS Fragmentation of **IGDQWDK**

Found in **FINC\_HUMAN**, Fibronectin OS=Homo sapiens GN=FN1 PE=1 SV=4

Match to Query 16908: 1171.565488 from(586.790020,2+) rtinseconds(1839) index(30820)

Title: Locus:1.1.1.3304.8 File:"2013-07-02 CLN FXIII 180 min 3rd F 3.wiff"

Data file C:\Program Files (x86)\Matrix Science\Mascot Daemon\mgf9 FXIII 180 min 3rd\mascot\_daemon\_merge.mgf

Click mouse within plot area to zoom in by factor of two about that point

Or, Plot from  to  Da

Label all possible matches  Label matches used for scoring

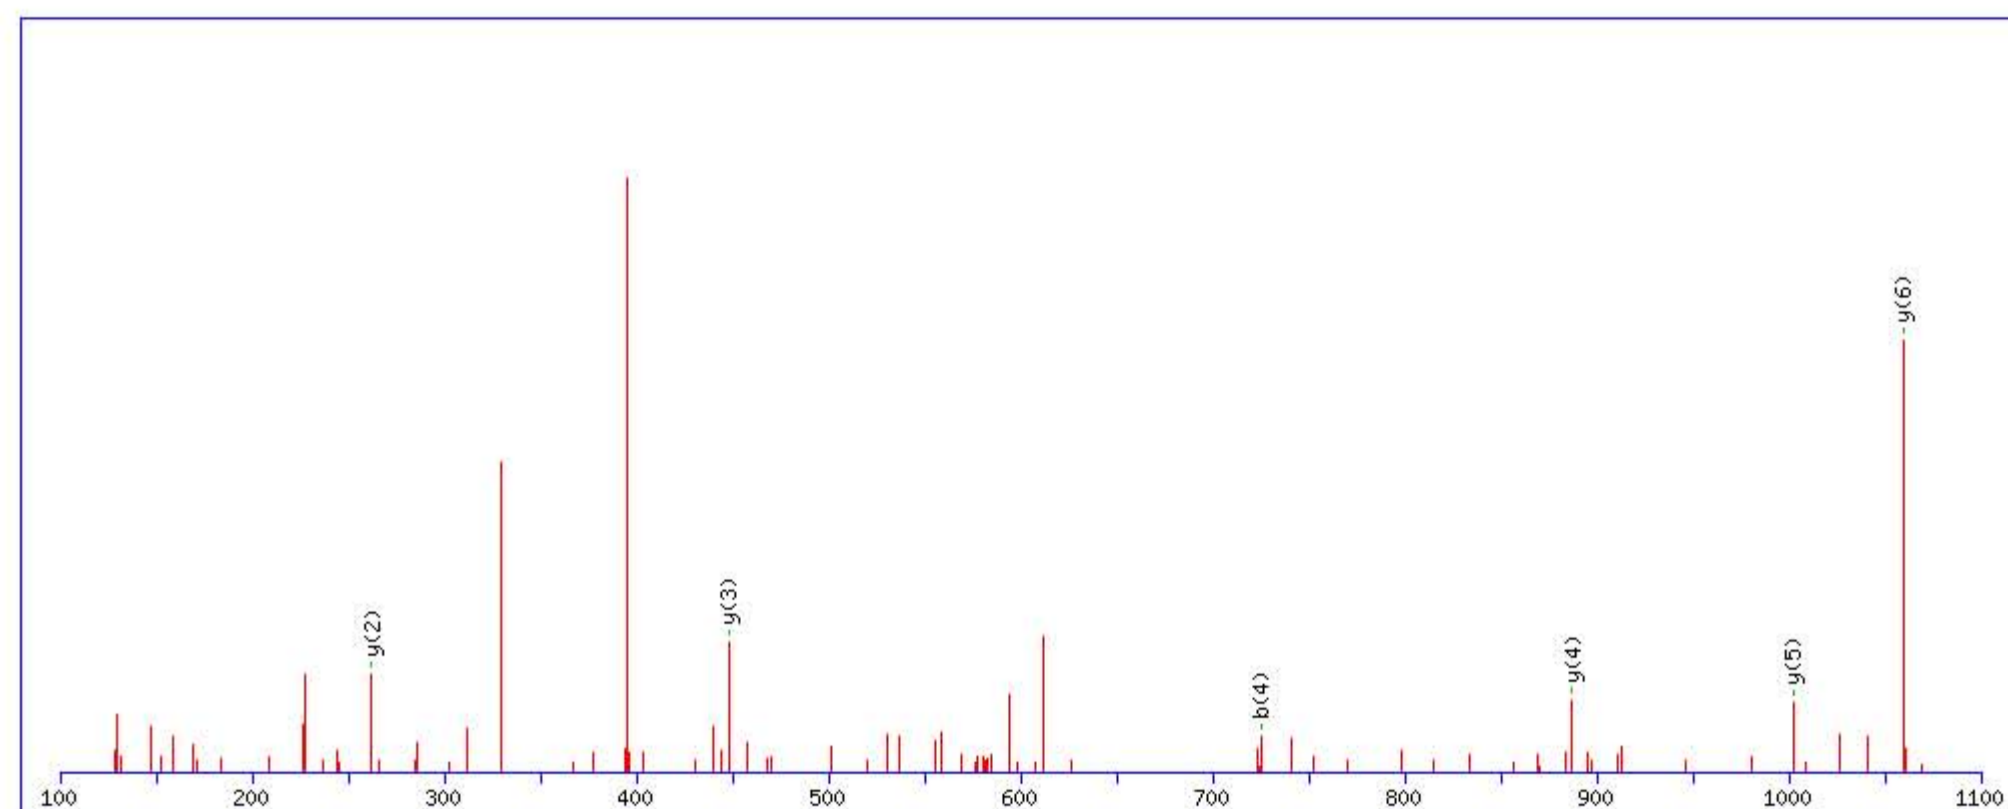

Monoisotopic mass of neutral peptide Mr(calc): 1171.569580

Fixed modifications: Carbamidomethyl (C) (apply to specified residues or termini only)

Variable modifications:

Q4 : Biotin:Thermo-21345 (Q)

Ions Score: 31 Expect: 0.0045

Matches : 6/60 fragment ions using 10 most intense peaks ([help](#))

| # | b           | b <sup>++</sup> | b <sup>*</sup> | b <sup>*++</sup> | b <sup>0</sup> | b <sup>0++</sup> | Seq. | y           | y <sup>++</sup> | y <sup>*</sup> | y <sup>*++</sup> | y <sup>0</sup> | y <sup>0++</sup> | # |
|---|-------------|-----------------|----------------|------------------|----------------|------------------|------|-------------|-----------------|----------------|------------------|----------------|------------------|---|
| 1 | 114.091340  | 57.549308       |                |                  |                |                  | I    |             |                 |                |                  |                |                  | 7 |
| 2 | 171.112804  | 86.060040       |                |                  |                |                  | G    | 1059.492793 | 530.250035      | 1042.466244    | 521.736760       | 1041.482228    | 521.244752       | 6 |
| 3 | 286.139747  | 143.573512      |                |                  | 268.129182     | 134.568229       | D    | 1002.471329 | 501.739303      | 985.444780     | 493.226028       | 984.460764     | 492.734020       | 5 |
| 4 | 725.365073  | 363.186175      | 708.338524     | 354.672900       | 707.354508     | 354.180892       | Q    | 887.444386  | 444.225831      | 870.417837     | 435.712557       | 869.433821     | 435.220549       | 4 |
| 5 | 911.444386  | 456.225831      | 894.417837     | 447.712557       | 893.433821     | 447.220549       | W    | 448.219060  | 224.613168      | 431.192511     | 216.099894       | 430.208495     | 215.607886       | 3 |
| 6 | 1026.471329 | 513.739303      | 1009.444780    | 505.226028       | 1008.460764    | 504.734020       | D    | 262.139747  | 131.573512      | 245.113198     | 123.060237       | 244.129182     | 122.568229       | 2 |
| 7 |             |                 |                |                  |                |                  | K    | 147.112804  | 74.060040       | 130.086255     | 65.546765        |                |                  | 1 |

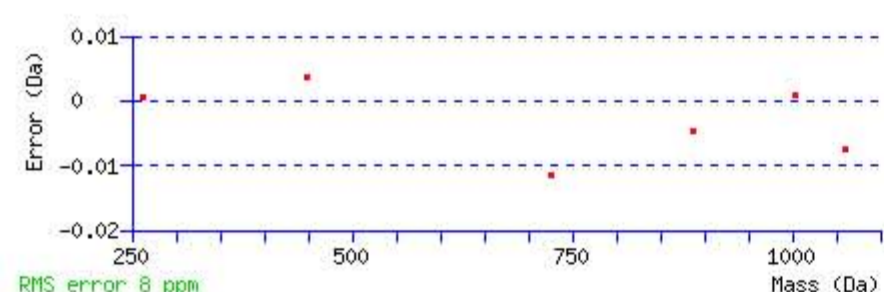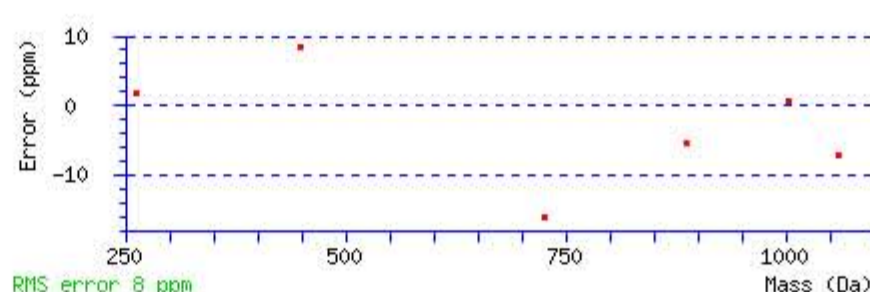

NCBI BLAST search of **IGDQWDK**

(Parameters: blastp, nr protein database, expect=20000, no filter, PAM30)

Other BLAST [web gateways](#)

## All matches to this query

| Score | Mr(calc):   | Delta     | Sequence                     |
|-------|-------------|-----------|------------------------------|
| 31.2  | 1171.569580 | -0.004092 | <a href="#">IGDQWDK</a>      |
| 5.8   | 1171.569565 | -0.004077 | <a href="#">LGPEWSQPMK</a>   |
| 5.1   | 1171.572067 | -0.006579 | <a href="#">LGSGPDGAEIHK</a> |
| 3.5   | 1171.576096 | -0.010608 | <a href="#">LYFSDATLDK</a>   |
| 2.9   | 1171.572037 | -0.006549 | <a href="#">ENPEVKAAEEK</a>  |
| 1.9   | 1171.554337 | 0.011151  | <a href="#">ALCDTPGVDPK</a>  |
| 0.1   | 1171.565536 | -0.000048 | <a href="#">MGSGEPNPAGKK</a> |

Mascot: <http://www.matrixscience.com/>

# MASCOT Search Results

## Peptide View

MS/MS Fragmentation of **QHDMGHMMR**

Found in **FINC\_HUMAN**, Fibronectin OS=Homo sapiens GN=FN1 PE=1 SV=4

Match to Query 25904: 1452.619736 from(364.162210,4+) rtinseconds(1444) index(28466)

Title: Locus:1.1.1.3166.2 File:"2013-07-02 CLN FXIII 180 min 3rd F 3.wiff"

Data file C:\Program Files (x86)\Matrix Science\Mascot Daemon\mgf9 FXIII 180 min 3rd\mascot\_daemon\_merge.mgf

Click mouse within plot area to zoom in by factor of two about that point

Or, Plot from  to  Da

Label all possible matches  Label matches used for scoring

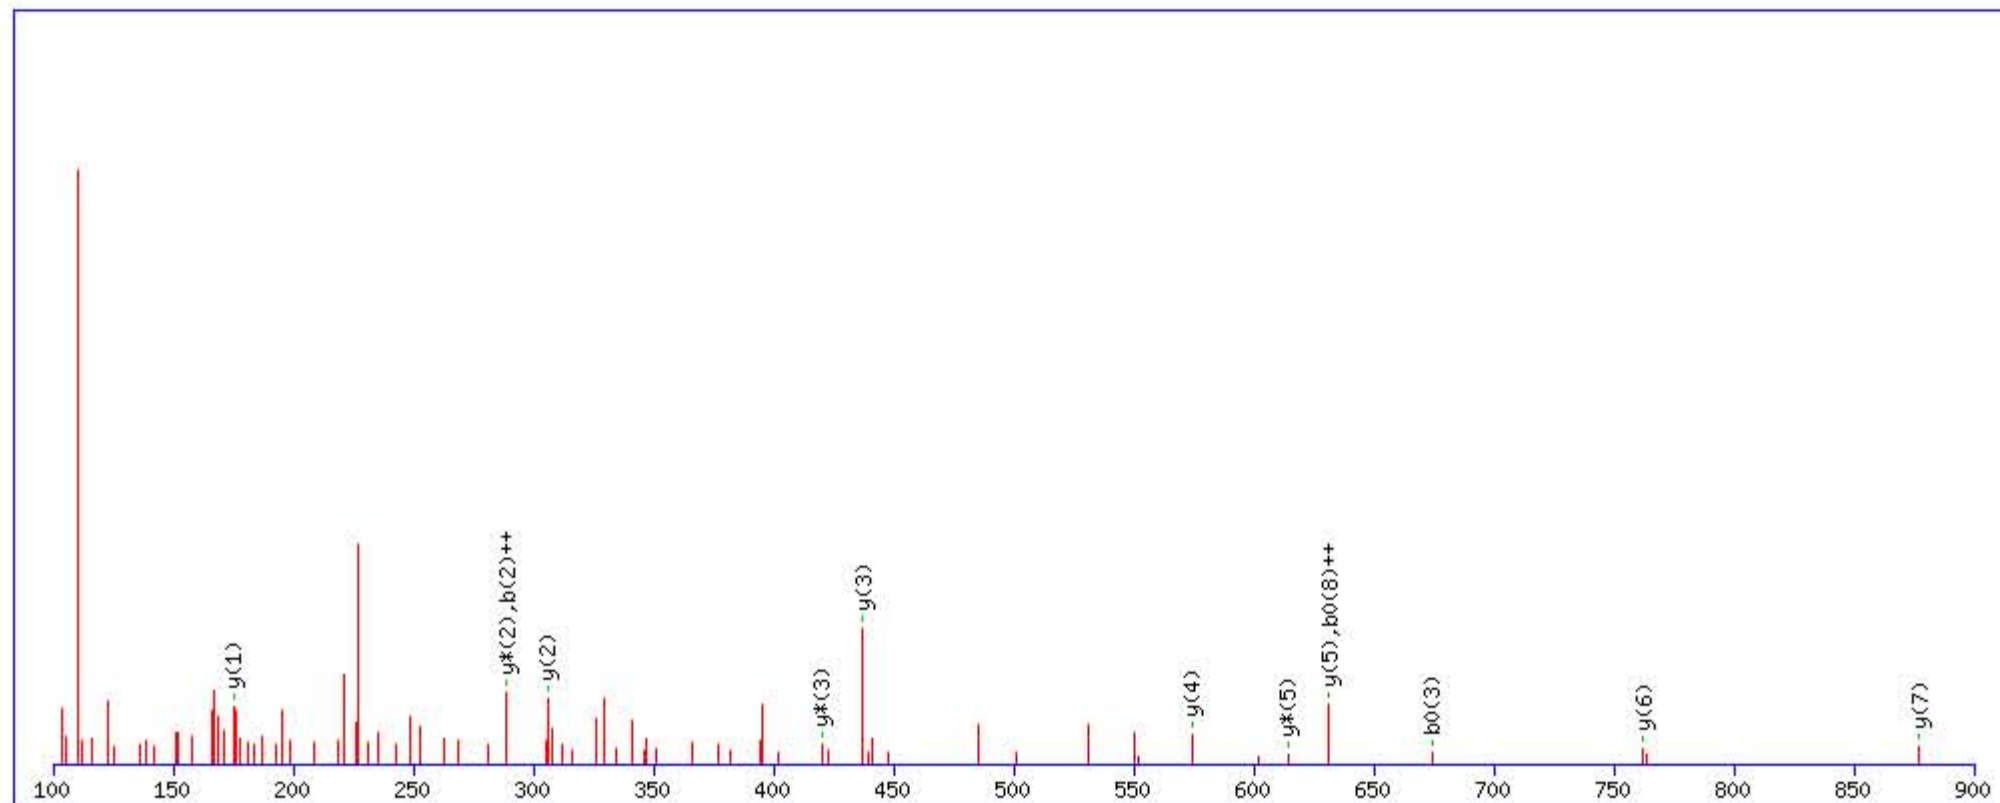

Monoisotopic mass of neutral peptide Mr(calc): 1452.624680

Fixed modifications: Carbamidomethyl (C) (apply to specified residues or termini only)

Variable modifications:

Q1 : Biotin:Thermo-21345 (Q)

Ions Score: 28 Expect: 0.0059

Matches : 13/80 fragment ions using 26 most intense peaks [\(help\)](#)

| # | b           | b <sup>++</sup> | b <sup>*</sup> | b <sup>+++</sup> | b <sup>0</sup> | b <sup>0++</sup> | Seq. | y           | y <sup>++</sup> | y <sup>*</sup> | y <sup>+++</sup> | y <sup>0</sup> | y <sup>0++</sup> | # |
|---|-------------|-----------------|----------------|------------------|----------------|------------------|------|-------------|-----------------|----------------|------------------|----------------|------------------|---|
| 1 | 440.232602  | 220.619939      | 423.206053     | 212.106664       |                |                  | Q    |             |                 |                |                  |                |                  | 9 |
| 2 | 577.291514  | 289.149395      | 560.264965     | 280.636121       |                |                  | H    | 1014.406638 | 507.706957      | 997.380089     | 499.193682       | 996.396073     | 498.701674       | 8 |
| 3 | 692.318457  | 346.662867      | 675.291908     | 338.149592       | 674.307892     | 337.657584       | D    | 877.347726  | 439.177501      | 860.321177     | 430.664226       | 859.337161     | 430.172218       | 7 |
| 4 | 823.358942  | 412.183109      | 806.332393     | 403.669834       | 805.348377     | 403.177826       | M    | 762.320783  | 381.664030      | 745.294234     | 373.150755       |                |                  | 6 |
| 5 | 880.380406  | 440.693841      | 863.353857     | 432.180567       | 862.369841     | 431.688559       | G    | 631.280298  | 316.143787      | 614.253749     | 307.630513       |                |                  | 5 |
| 6 | 1017.439318 | 509.223297      | 1000.412769    | 500.710022       | 999.428753     | 500.218014       | H    | 574.258834  | 287.633055      | 557.232285     | 279.119780       |                |                  | 4 |
| 7 | 1148.479803 | 574.743540      | 1131.453254    | 566.230265       | 1130.469238    | 565.738257       | M    | 437.199922  | 219.103599      | 420.173373     | 210.590324       |                |                  | 3 |
| 8 | 1279.520288 | 640.263782      | 1262.493739    | 631.750508       | 1261.509723    | 631.258499       | M    | 306.159437  | 153.583356      | 289.132888     | 145.070082       |                |                  | 2 |
| 9 |             |                 |                |                  |                |                  | R    | 175.118952  | 88.063114       | 158.092403     | 79.549839        |                |                  | 1 |

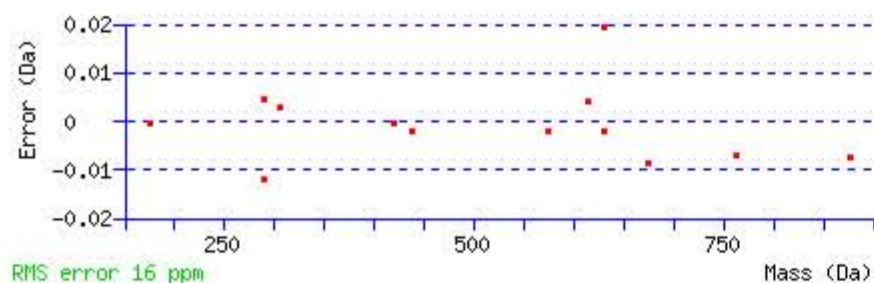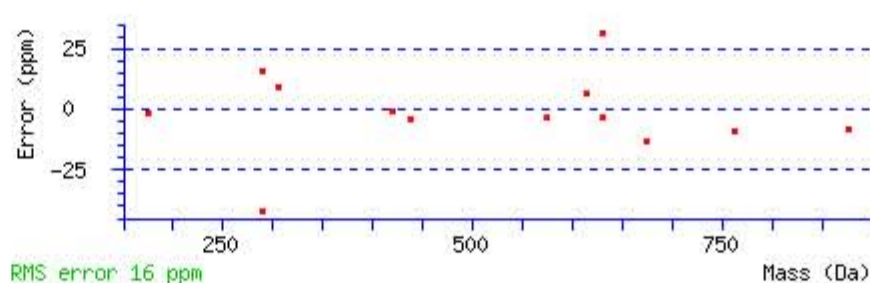

NCBI BLAST search of [QHDMGHMMR](#)

(Parameters: blastp, nr protein database, expect=20000, no filter, PAM30)

Other BLAST [web gateways](#)

All matches to this query

| Score | Mr(calc):   | Delta     | Sequence                     |
|-------|-------------|-----------|------------------------------|
| 28.4  | 1452.624680 | -0.004944 | <a href="#">QHDMGHMMR</a>    |
| 1.4   | 1452.638382 | -0.018646 | <a href="#">MAMEAGRRDNMR</a> |

Mascot: <http://www.matrixscience.com/>

**MASCOT** Mascot Search Results

**Peptide View**

MS/MS Fragmentation of **RPGGEPSPGTTGQSYNQYSQR**  
 Found in **FINC\_HUMAN**, Fibronectin OS=Homo sapiens GN=FN1 PE=1 SV=4

Match to Query 32963: 3328.570736 from(833.149960,4+) rtinseconds(2038) index(32110)  
 Title: Locus:1.1.1.3373.13 File:"2013-07-02 CLN FXIII 180 min 3rd F 3.wiff"  
 Data file C:\Program Files (x86)\Matrix Science\Mascot Daemon\mgf\9 FXIII 180 min 3rd\mascot\_daemon\_merge.mgf

Click mouse within plot area to zoom in by factor of two about that point  
 Or, Plot from  to  Da   
 Label all possible matches  Label matches used for scoring

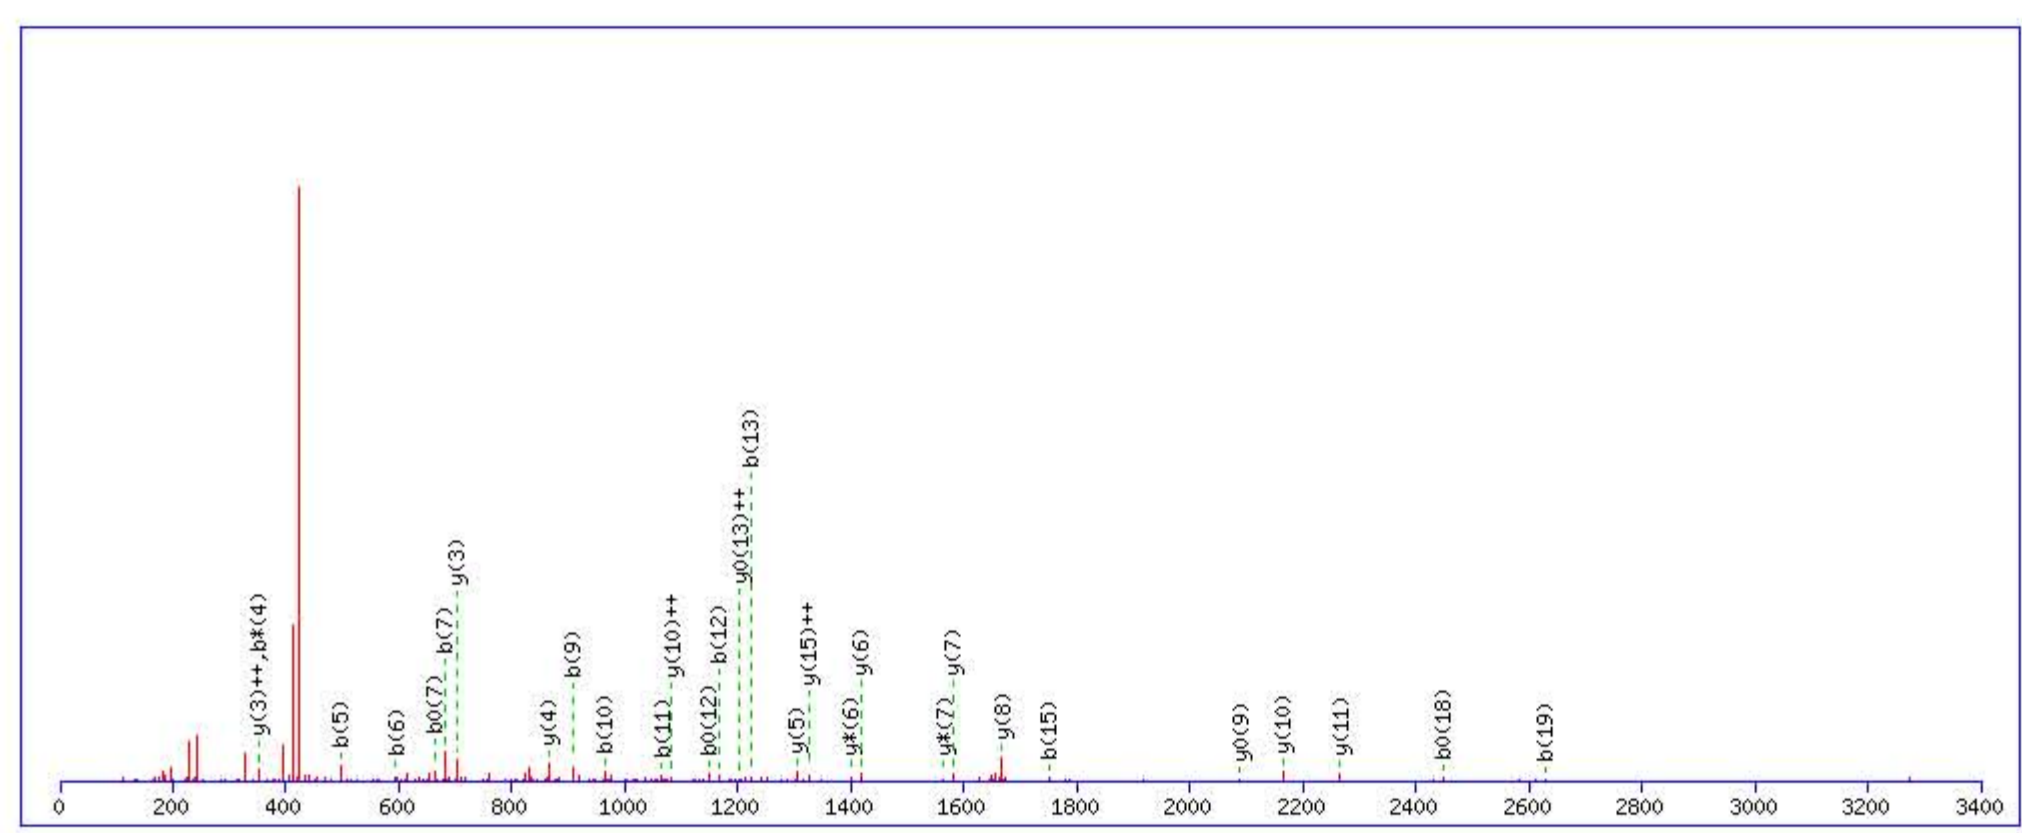

Monoisotopic mass of neutral peptide Mr(calc): 3328.579117  
 Fixed modifications: Carbamidomethyl (C) (apply to specified residues or termini only)  
 Variable modifications:  
 Q14 : Biotin:Thermo-21345 (Q)  
 Q18 : Biotin:Thermo-21345 (Q)  
 Q21 : Biotin:Thermo-21345 (Q)  
 Ions Score: 41 Expect: 0.00019  
 Matches : 29/240 fragment ions using 60 most intense peaks [\(help\)](#)

| #  | b           | b <sup>++</sup> | b <sup>+</sup> | b <sup>*++</sup> | b <sup>0</sup> | b <sup>0++</sup> | Seq. | y           | y <sup>++</sup> | y <sup>+</sup> | y <sup>*++</sup> | y <sup>0</sup> | y <sup>0++</sup> | #  |
|----|-------------|-----------------|----------------|------------------|----------------|------------------|------|-------------|-----------------|----------------|------------------|----------------|------------------|----|
| 1  | 157.108387  | 79.057831       | 140.081838     | 70.544557        |                |                  | R    |             |                 |                |                  |                |                  | 22 |
| 2  | 254.161151  | 127.584213      | 237.134602     | 119.070939       |                |                  | P    | 3173.485291 | 1587.246283     | 3156.458742    | 1578.733009      | 3155.474726    | 1578.241001      | 21 |
| 3  | 311.182615  | 156.094945      | 294.156066     | 147.581671       |                |                  | G    | 3076.432527 | 1538.719901     | 3059.405978    | 1530.206627      | 3058.421962    | 1529.714619      | 20 |
| 4  | 368.204079  | 184.605677      | 351.177530     | 176.092403       |                |                  | G    | 3019.411063 | 1510.209169     | 3002.384514    | 1501.695895      | 3001.400498    | 1501.203887      | 19 |
| 5  | 497.246672  | 249.126974      | 480.220123     | 240.613700       | 479.236107     | 240.121692       | E    | 2962.389599 | 1481.698438     | 2945.363050    | 1473.185163      | 2944.379034    | 1472.693155      | 18 |
| 6  | 594.299436  | 297.653356      | 577.272887     | 289.140082       | 576.288871     | 288.648074       | P    | 2833.347006 | 1417.177141     | 2816.320457    | 1408.663866      | 2815.336441    | 1408.171858      | 17 |
| 7  | 681.331464  | 341.169370      | 664.304915     | 332.656095       | 663.320899     | 332.164087       | S    | 2736.294242 | 1368.650759     | 2719.267693    | 1360.137484      | 2718.283677    | 1359.645476      | 16 |
| 8  | 778.384228  | 389.695752      | 761.357679     | 381.182478       | 760.373663     | 380.690470       | P    | 2649.262214 | 1325.134745     | 2632.235665    | 1316.621470      | 2631.251649    | 1316.129462      | 15 |
| 9  | 907.426821  | 454.217049      | 890.400272     | 445.703774       | 889.416256     | 445.211766       | E    | 2552.209450 | 1276.608363     | 2535.182901    | 1268.095088      | 2534.198885    | 1267.603080      | 14 |
| 10 | 964.448285  | 482.727781      | 947.421736     | 474.214506       | 946.437720     | 473.722498       | G    | 2423.166857 | 1212.087066     | 2406.140308    | 1203.573792      | 2405.156292    | 1203.081784      | 13 |
| 11 | 1065.495964 | 533.251620      | 1048.469415    | 524.738346       | 1047.485399    | 524.246337       | T    | 2366.145393 | 1183.576334     | 2349.118844    | 1175.063060      | 2348.134828    | 1174.571052      | 12 |
| 12 | 1166.543643 | 583.775460      | 1149.517094    | 575.262185       | 1148.533078    | 574.770177       | T    | 2265.097714 | 1133.052495     | 2248.071165    | 1124.539220      | 2247.087149    | 1124.047212      | 11 |
| 13 | 1223.565107 | 612.286191      | 1206.538558    | 603.772917       | 1205.554542    | 603.280909       | G    | 2164.050035 | 1082.528655     | 2147.023486    | 1074.015381      | 2146.039470    | 1073.523373      | 10 |
| 14 | 1662.790433 | 831.898854      | 1645.763884    | 823.385580       | 1644.779868    | 822.893572       | Q    | 2107.028571 | 1054.017924     | 2090.002022    | 1045.504649      | 2089.018006    | 1045.012641      | 9  |
| 15 | 1749.822461 | 875.414869      | 1732.795912    | 866.901594       | 1731.811896    | 866.409586       | S    | 1667.803245 | 834.405261      | 1650.776696    | 825.891986       | 1649.792680    | 825.399978       | 8  |
| 16 | 1912.885790 | 956.946533      | 1895.859241    | 948.433259       | 1894.875225    | 947.941251       | Y    | 1580.771217 | 790.889247      | 1563.744668    | 782.375972       | 1562.760652    | 781.883964       | 7  |
| 17 | 2026.928717 | 1013.967997     | 2009.902168    | 1005.454722      | 2008.918152    | 1004.962714      | N    | 1417.707888 | 709.357582      | 1400.681339    | 700.844308       | 1399.697323    | 700.352300       | 6  |
| 18 | 2466.154043 | 1233.580659     | 2449.127494    | 1225.067385      | 2448.143478    | 1224.575377      | Q    | 1303.664961 | 652.336119      | 1286.638412    | 643.822844       | 1285.654396    | 643.330836       | 5  |
| 19 | 2629.217372 | 1315.112324     | 2612.190823    | 1306.599049      | 2611.206807    | 1306.107041      | Y    | 864.439635  | 432.723456      | 847.413086     | 424.210181       | 846.429070     | 423.718173       | 4  |
| 20 | 2716.249400 | 1358.628338     | 2699.222851    | 1350.115063      | 2698.238835    | 1349.623056      | S    | 701.376306  | 351.191791      | 684.349757     | 342.678517       | 683.365741     | 342.186509       | 3  |
| 21 | 3155.474726 | 1578.241001     | 3138.448177    | 1569.727727      | 3137.464161    | 1569.235719      | Q    | 614.344278  | 307.675777      | 597.317729     | 299.162503       |                |                  | 2  |
| 22 |             |                 |                |                  |                |                  | R    | 175.118952  | 88.063114       | 158.092403     | 79.549839        |                |                  | 1  |

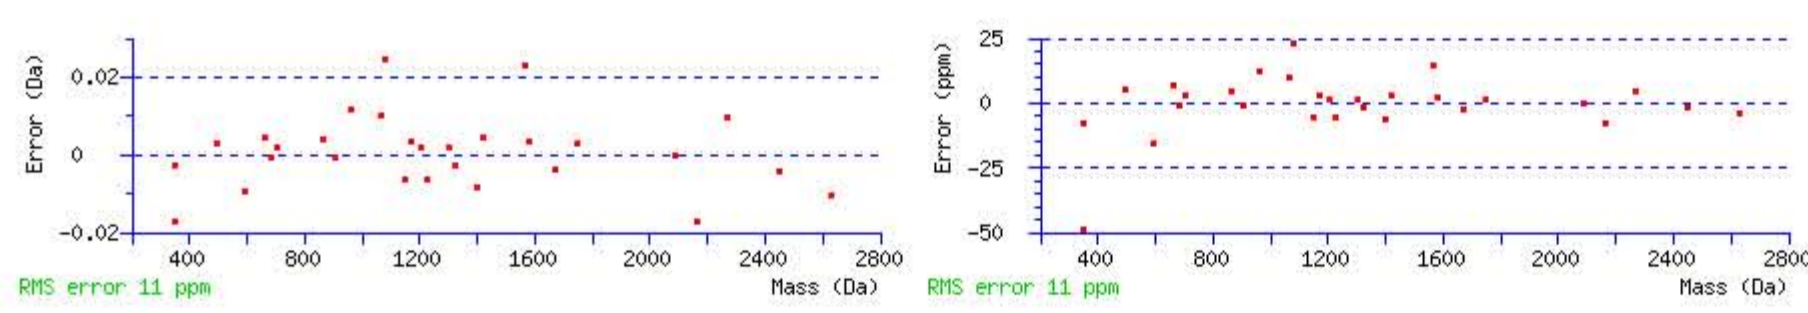

NCBI BLAST search of **RPGGEPSPGTTGQSYNQYSQR**  
 (Parameters: blastp, nr protein database, expect=20000, no filter, PAM30)  
 Other BLAST [web gateways](#)

**All matches to this query**

| Score | Mr(calc):   | Delta     | Sequence                                     |
|-------|-------------|-----------|----------------------------------------------|
| 41.3  | 3328.579117 | -0.008381 | <a href="#">RPGGEPSPGTTGQSYNQYSQR</a>        |
| 1.7   | 3328.600220 | -0.029484 | <a href="#">VPPEWKALTDMPQMRMELERPGGNEITR</a> |

# MASCOT SEARCH RESULTS

## Peptide View

MS/MS Fragmentation of **HYQINQQWER**

Found in **FINC\_HUMAN**, Fibronectin OS=Homo sapiens GN=FN1 PE=1 SV=4

Match to Query 33872: 1711.831708 from(856.923130,2+) rtinseconds(1795) index(30573)

Title: Locus:1.1.1.3288.17 File:"2013-07-02 CLN FXIII 180 min 3rd F 3.wiff"

Data file C:\Program Files (x86)\Matrix Science\Mascot Daemon\mgf9 FXIII 180 min 3rd\mascot\_daemon\_merge.mgf

Click mouse within plot area to zoom in by factor of two about that point

Or, Plot from  to  Da

Label all possible matches  Label matches used for scoring

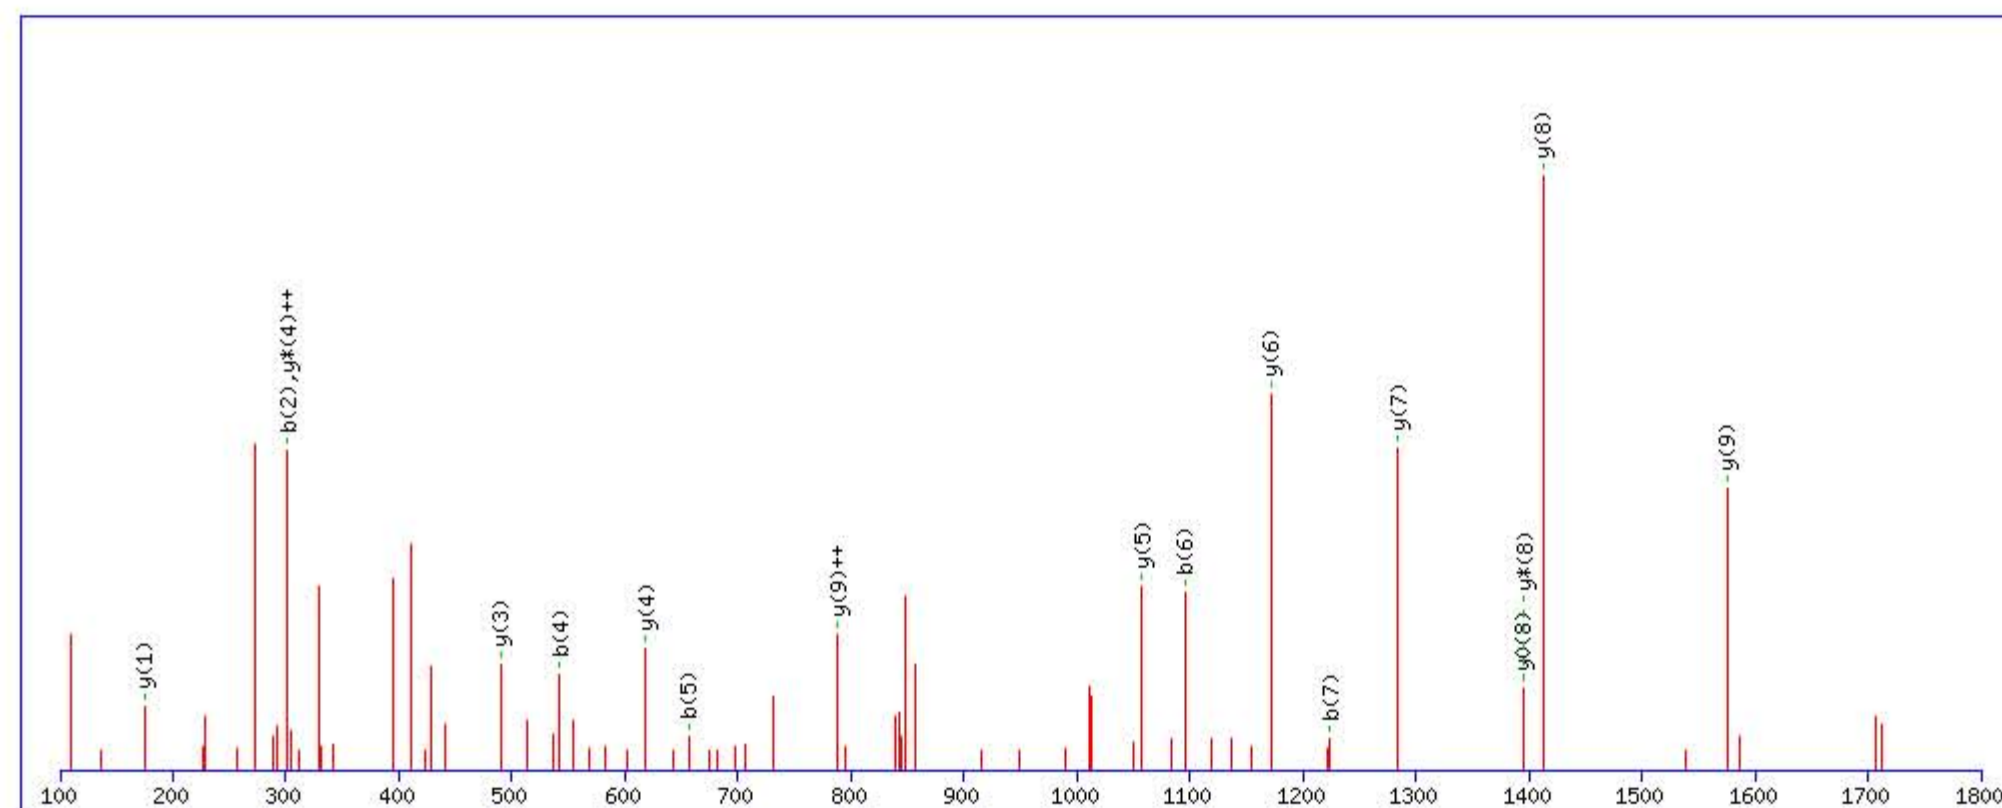

Monoisotopic mass of neutral peptide  $M_r(\text{calc})$ : 1711.825272

Fixed modifications: Carbamidomethyl (C) (apply to specified residues or termini only)

Variable modifications:

Q6 : Biotin:Thermo-21345 (Q)

Ions Score: 44 Expect: 0.00086

Matches : 17/86 fragment ions using 31 most intense peaks [\(help\)](#)

| #  | b                  | b <sup>++</sup> | b <sup>+</sup> | b <sup>*++</sup> | b <sup>0</sup> | b <sup>0++</sup> | Seq. | y                  | y <sup>++</sup>   | y <sup>+</sup>     | y <sup>*++</sup>  | y <sup>0</sup>     | y <sup>0++</sup> | #  |
|----|--------------------|-----------------|----------------|------------------|----------------|------------------|------|--------------------|-------------------|--------------------|-------------------|--------------------|------------------|----|
| 1  | 138.066188         | 69.536732       |                |                  |                |                  | H    |                    |                   |                    |                   |                    |                  | 10 |
| 2  | <b>301.129517</b>  | 151.068397      |                |                  |                |                  | Y    | <b>1575.773660</b> | <b>788.390468</b> | 1558.747111        | 779.877194        | 1557.763095        | 779.385186       | 9  |
| 3  | 429.188095         | 215.097686      | 412.161546     | 206.584411       |                |                  | Q    | <b>1412.710331</b> | 706.858804        | <b>1395.683782</b> | 698.345529        | <b>1394.699766</b> | 697.853521       | 8  |
| 4  | <b>542.272159</b>  | 271.639718      | 525.245610     | 263.126443       |                |                  | I    | <b>1284.651753</b> | 642.829514        | 1267.625204        | 634.316240        | 1266.641188        | 633.824232       | 7  |
| 5  | <b>656.315086</b>  | 328.661181      | 639.288537     | 320.147907       |                |                  | N    | <b>1171.567689</b> | 586.287483        | 1154.541140        | 577.774208        | 1153.557124        | 577.282200       | 6  |
| 6  | <b>1095.540412</b> | 548.273844      | 1078.513863    | 539.760570       |                |                  | Q    | <b>1057.524762</b> | 529.266019        | 1040.498213        | 520.752745        | 1039.514197        | 520.260737       | 5  |
| 7  | <b>1223.598990</b> | 612.303133      | 1206.572441    | 603.789859       |                |                  | Q    | <b>618.299436</b>  | 309.653356        | 601.272887         | <b>301.140082</b> | 600.288871         | 300.648074       | 4  |
| 8  | 1409.678303        | 705.342790      | 1392.651754    | 696.829515       |                |                  | W    | <b>490.240858</b>  | 245.624067        | 473.214309         | 237.110792        | 472.230293         | 236.618784       | 3  |
| 9  | 1538.720896        | 769.864086      | 1521.694347    | 761.350812       | 1520.710331    | 760.858804       | E    | 304.161545         | 152.584410        | 287.134996         | 144.071136        | 286.150980         | 143.579128       | 2  |
| 10 |                    |                 |                |                  |                |                  | R    | <b>175.118952</b>  | 88.063114         | 158.092403         | 79.549839         |                    |                  | 1  |

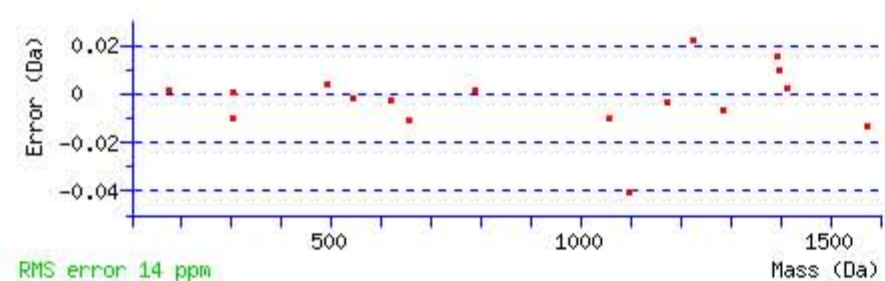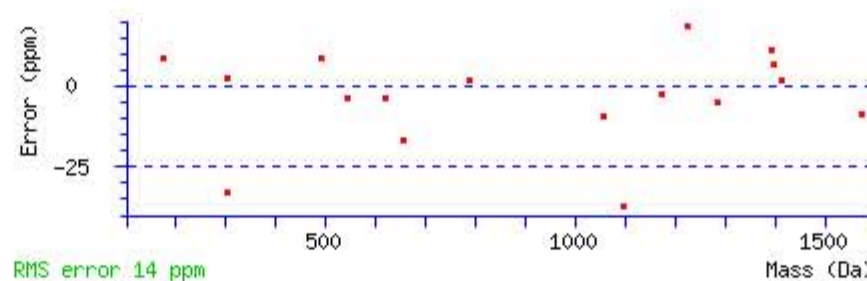

NCBI BLAST search of [HYQINQQWER](#)

(Parameters: blastp, nr protein database, expect=20000, no filter, PAM30)

Other BLAST [web gateways](#)

All matches to this query

| Score | $M_r(\text{calc})$ : | Delta    | Sequence                   |
|-------|----------------------|----------|----------------------------|
| 44.0  | 1711.825272          | 0.006436 | <a href="#">HYQINQQWER</a> |
| 31.7  | 1711.825272          | 0.006436 | <a href="#">HYQINQQWER</a> |
| 13.1  | 1711.825272          | 0.006436 | <a href="#">HYQINQQWER</a> |

Mascot: <http://www.matrixscience.com/>

# MASCOT Search Results

## Peptide View

MS/MS Fragmentation of **GEWTCIAYSQLR**

Found in **FINC\_HUMAN**, Fibronectin OS=Homo sapiens GN=FN1 PE=1 SV=4

Match to Query 35590: 1793.862048 from(897.938300,2+) rtinseconds(2380) index(33969)

Title: Locus:1.1.1.3492.13 File:"2013-07-02 CLN FXIII 180 min 3rd F 3.wiff"

Data file C:\Program Files (x86)\Matrix Science\Mascot Daemon\mgf9 FXIII 180 min 3rd\mascot\_daemon\_merge.mgf

Click mouse within plot area to zoom in by factor of two about that point

Or, Plot from  to  Da

Label all possible matches  Label matches used for scoring

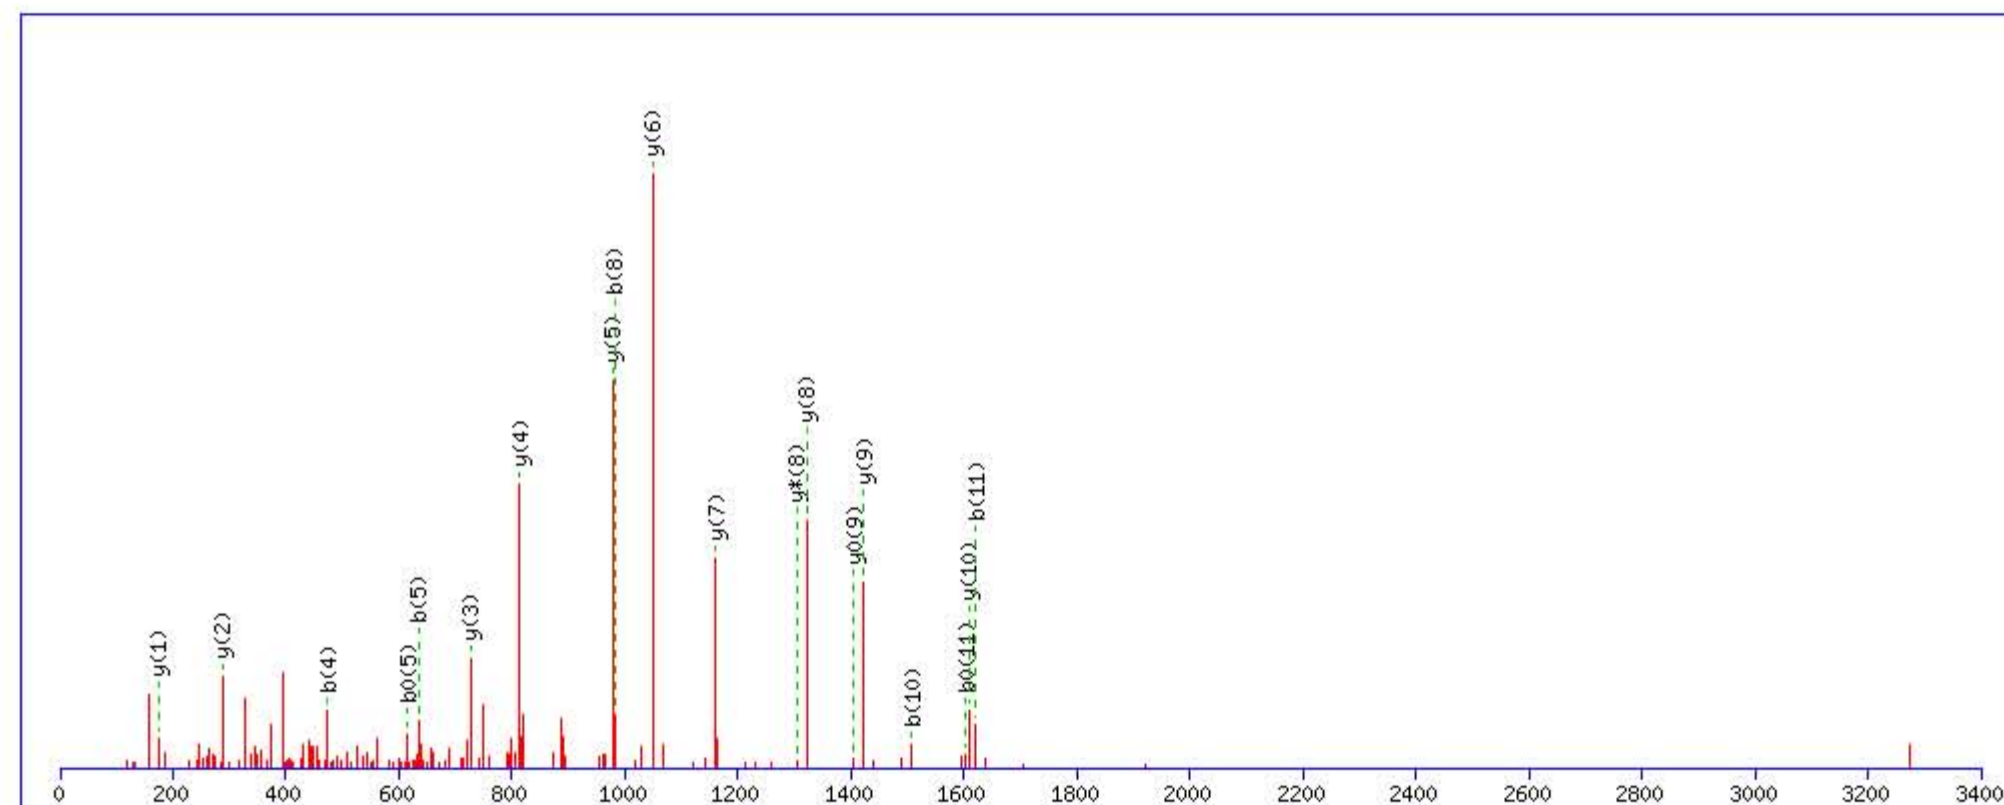

Monoisotopic mass of neutral peptide Mr(calc): 1793.859283

Fixed modifications: Carbamidomethyl (C) (apply to specified residues or termini only)

Variable modifications:

Q10 : Biotin:Thermo-21345 (Q)

Ions Score: 72 Expect: 1.2e-006

Matches : 19/106 fragment ions using 32 most intense peaks [\(help\)](#)

| #  | b                  | b <sup>++</sup> | b <sup>*</sup> | b <sup>*++</sup> | b <sup>0</sup>     | b <sup>0++</sup> | Seq. | y                  | y <sup>++</sup> | y <sup>*</sup>     | y <sup>*++</sup> | y <sup>0</sup>     | y <sup>0++</sup> | #  |
|----|--------------------|-----------------|----------------|------------------|--------------------|------------------|------|--------------------|-----------------|--------------------|------------------|--------------------|------------------|----|
| 1  | 58.028740          | 29.518008       |                |                  |                    |                  | G    |                    |                 |                    |                  |                    |                  | 12 |
| 2  | 187.071333         | 94.039305       |                |                  | 169.060768         | 85.034022        | E    | 1737.845111        | 869.426194      | 1720.818562        | 860.912919       | 1719.834546        | 860.420911       | 11 |
| 3  | 373.150646         | 187.078961      |                |                  | 355.140081         | 178.073679       | W    | <b>1608.802518</b> | 804.904897      | 1591.775969        | 796.391623       | 1590.791953        | 795.899614       | 10 |
| 4  | <b>474.198325</b>  | 237.602801      |                |                  | 456.187760         | 228.597518       | T    | <b>1422.723205</b> | 711.865241      | 1405.696656        | 703.351966       | <b>1404.712640</b> | 702.859958       | 9  |
| 5  | <b>634.228974</b>  | 317.618125      |                |                  | <b>616.218409</b>  | 308.612843       | C    | <b>1321.675526</b> | 661.341401      | <b>1304.648977</b> | 652.828127       | 1303.664961        | 652.336119       | 8  |
| 6  | 747.313038         | 374.160157      |                |                  | 729.302473         | 365.154875       | I    | <b>1161.644877</b> | 581.326077      | 1144.618328        | 572.812802       | 1143.634312        | 572.320794       | 7  |
| 7  | 818.350152         | 409.678714      |                |                  | 800.339587         | 400.673432       | A    | <b>1048.560813</b> | 524.784044      | 1031.534264        | 516.270770       | 1030.550248        | 515.778762       | 6  |
| 8  | <b>981.413481</b>  | 491.210379      |                |                  | 963.402916         | 482.205096       | Y    | <b>977.523699</b>  | 489.265488      | 960.497150         | 480.752213       | 959.513134         | 480.260205       | 5  |
| 9  | 1068.445509        | 534.726393      |                |                  | 1050.434944        | 525.721110       | S    | <b>814.460370</b>  | 407.733823      | 797.433821         | 399.220549       | 796.449805         | 398.728541       | 4  |
| 10 | <b>1507.670835</b> | 754.339056      | 1490.644286    | 745.825781       | 1489.660270        | 745.333773       | Q    | <b>727.428342</b>  | 364.217809      | 710.401793         | 355.704534       |                    |                  | 3  |
| 11 | <b>1620.754899</b> | 810.881088      | 1603.728350    | 802.367813       | <b>1602.744334</b> | 801.875805       | L    | <b>288.203016</b>  | 144.605146      | 271.176467         | 136.091871       |                    |                  | 2  |
| 12 |                    |                 |                |                  |                    |                  | R    | <b>175.118952</b>  | 88.063114       | 158.092403         | 79.549839        |                    |                  | 1  |

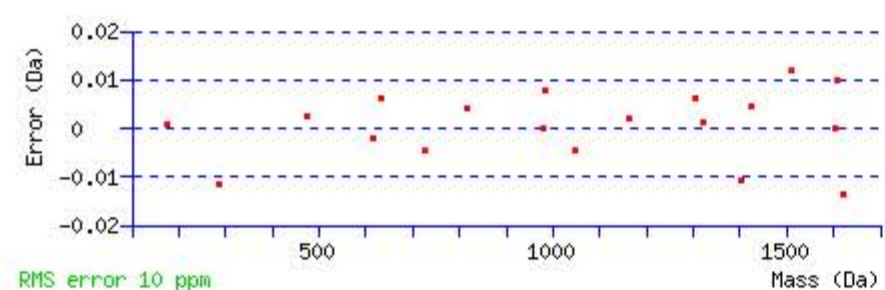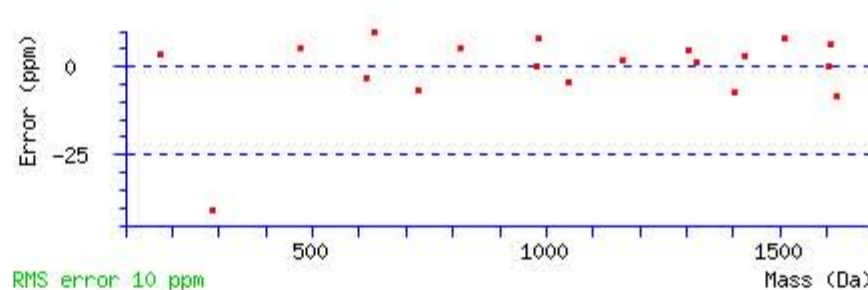

NCBI BLAST search of **GEWTCIAYSQLR**

(Parameters: blastp, nr protein database, expect=20000, no filter, PAM30)

Other BLAST [web gateways](#)

All matches to this query

| Score | Mr(calc):   | Delta     | Sequence                         |
|-------|-------------|-----------|----------------------------------|
| 72.0  | 1793.859283 | 0.002765  | <a href="#">GEWTCIAYSQLR</a>     |
| 18.7  | 1793.865158 | -0.003110 | <a href="#">ACLECELTSDKDVTLR</a> |
| 6.2   | 1793.888275 | -0.026227 | <a href="#">QYVVEPNFANKAVCR</a>  |
| 1.9   | 1793.873016 | -0.010968 | <a href="#">DQKLFVSESRMPDSR</a>  |
| 1.9   | 1793.870529 | -0.008481 | <a href="#">MAPGCWFLISSRPTR</a>  |

Mascot: <http://www.matrixscience.com/>

# MASCOT SCIENCE Mascot Search Results

## Peptide View

MS/MS Fragmentation of **WCGTTQNYDADQK**

Found in **FINC\_HUMAN**, Fibronectin OS=Homo sapiens GN=FN1 PE=1 SV=4

Match to Query 37359: 1896.804942 from(633.275590,3+) rtinseconds(1688) index(29940)

Title: Locus:1.1.1.3251.6 File:"2013-07-02 CLN FXIII 180 min 3rd F 3.wiff"

Data file C:\Program Files (x86)\Matrix Science\Mascot Daemon\mgf\9 FXIII 180 min 3rd\mascot\_daemon\_merge.mgf

Click mouse within plot area to zoom in by factor of two about that point

Or, Plot from  to  Da

Label all possible matches  Label matches used for scoring

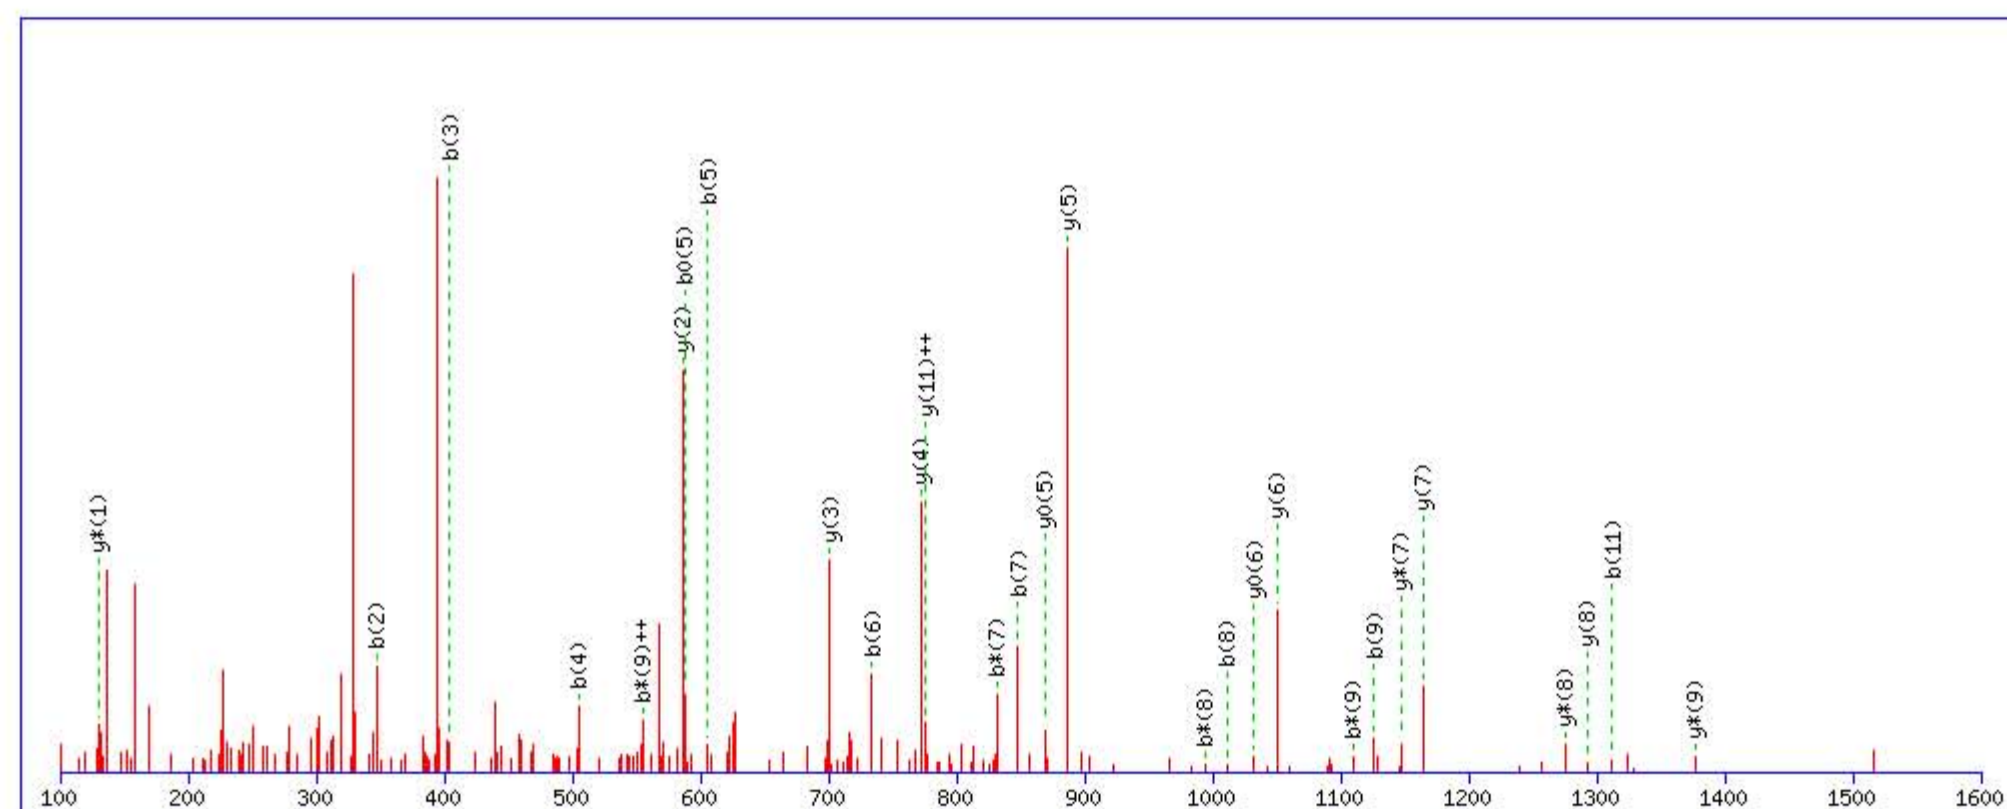

Monoisotopic mass of neutral peptide Mr(calc): 1896.813477

Fixed modifications: Carbamidomethyl (C) (apply to specified residues or termini only)

Variable modifications:

Q12 : Biotin:Thermo-21345 (Q)

Ions Score: 34 Expect: 0.0012

Matches : 28/124 fragment ions using 64 most intense peaks [\(help\)](#)

| #  | b                  | b <sup>++</sup> | b <sup>*</sup>     | b <sup>*++</sup>  | b <sup>0</sup>    | b <sup>0++</sup> | Seq. | y                  | y <sup>++</sup>   | y <sup>*</sup>     | y <sup>*++</sup> | y <sup>0</sup>     | y <sup>0++</sup> | #  |
|----|--------------------|-----------------|--------------------|-------------------|-------------------|------------------|------|--------------------|-------------------|--------------------|------------------|--------------------|------------------|----|
| 1  | 187.086589         | 94.046932       |                    |                   |                   |                  | W    |                    |                   |                    |                  |                    |                  | 13 |
| 2  | <b>347.117238</b>  | 174.062257      |                    |                   |                   |                  | C    | 1711.741435        | 856.374356        | 1694.714886        | 847.861081       | 1693.730870        | 847.369073       | 12 |
| 3  | <b>404.138702</b>  | 202.572989      |                    |                   |                   |                  | G    | 1551.710786        | <b>776.359031</b> | 1534.684237        | 767.845757       | 1533.700221        | 767.353749       | 11 |
| 4  | <b>505.186381</b>  | 253.096828      |                    |                   | 487.175816        | 244.091546       | T    | 1494.689322        | 747.848299        | 1477.662773        | 739.335025       | 1476.678757        | 738.843017       | 10 |
| 5  | <b>606.234060</b>  | 303.620668      |                    |                   | <b>588.223495</b> | 294.615386       | T    | 1393.641643        | 697.324460        | <b>1376.615094</b> | 688.811185       | 1375.631078        | 688.319177       | 9  |
| 6  | <b>734.292638</b>  | 367.649957      | 717.266089         | 359.136683        | 716.282073        | 358.644675       | Q    | <b>1292.593964</b> | 646.800620        | <b>1275.567415</b> | 638.287346       | 1274.583399        | 637.795338       | 8  |
| 7  | <b>848.335565</b>  | 424.671421      | <b>831.309016</b>  | 416.158146        | 830.325000        | 415.666138       | N    | <b>1164.535386</b> | 582.771331        | <b>1147.508837</b> | 574.258057       | 1146.524821        | 573.766049       | 7  |
| 8  | <b>1011.398894</b> | 506.203085      | <b>994.372345</b>  | 497.689810        | 993.388329        | 497.197802       | Y    | <b>1050.492459</b> | 525.749868        | 1033.465910        | 517.236593       | <b>1032.481894</b> | 516.744585       | 6  |
| 9  | <b>1126.425837</b> | 563.716557      | <b>1109.399288</b> | <b>555.203282</b> | 1108.415272       | 554.711274       | D    | <b>887.429130</b>  | 444.218203        | 870.402581         | 435.704929       | <b>869.418565</b>  | 435.212921       | 5  |
| 10 | 1197.462951        | 599.235114      | 1180.436402        | 590.721839        | 1179.452386       | 590.229831       | A    | <b>772.402187</b>  | 386.704732        | 755.375638         | 378.191457       | 754.391622         | 377.699449       | 4  |
| 11 | <b>1312.489894</b> | 656.748585      | 1295.463345        | 648.235311        | 1294.479329       | 647.743303       | D    | <b>701.365073</b>  | 351.186175        | 684.338524         | 342.672900       | 683.354508         | 342.180892       | 3  |
| 12 | 1751.715220        | 876.361248      | 1734.688671        | 867.847974        | 1733.704655       | 867.355966       | Q    | <b>586.338130</b>  | 293.672703        | 569.311581         | 285.159429       |                    |                  | 2  |
| 13 |                    |                 |                    |                   |                   |                  | K    | 147.112804         | 74.060040         | <b>130.086255</b>  | 65.546765        |                    |                  | 1  |

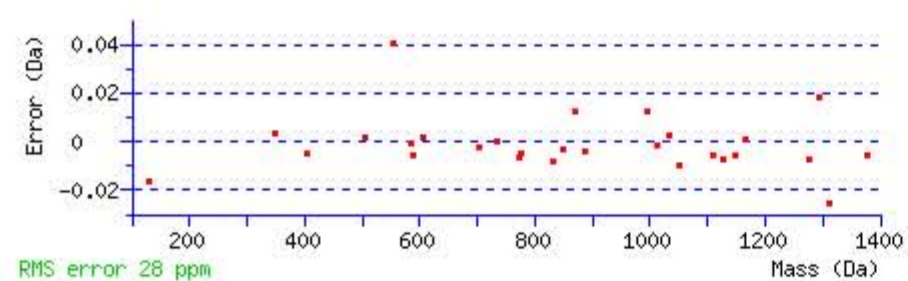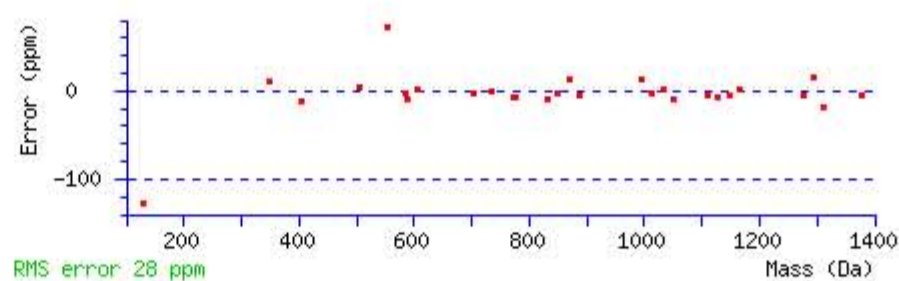

NCBI BLAST search of [WCGTTQNYDADQK](#)

(Parameters: blastp, nr protein database, expect=20000, no filter, PAM30)

Other BLAST [web gateways](#)

All matches to this query

| Score | Mr(calc):   | Delta     | Sequence                      |
|-------|-------------|-----------|-------------------------------|
| 34.2  | 1896.813477 | -0.008535 | <a href="#">WCGTTQNYDADQK</a> |

Mascot: <http://www.matrixscience.com/>

# MASCOT SCIENCE Mascot Search Results

## Peptide View

MS/MS Fragmentation of **TYHVGEQWQK**

Found in **FN1\_HUMAN**, Fibronectin OS=Homo sapiens GN=FN1 PE=1 SV=4

Match to Query 37366: 1896.938908 from(949.476730,2+) rtinseconds(2039) index(32114)

Title: Locus:1.1.1.3373.17 File:"2013-07-02 CLN FXIII 180 min 3rd F 3.wiff"

Data file C:\Program Files (x86)\Matrix Science\Mascot Daemon\mgf\9 FXIII 180 min 3rd\mascot\_daemon\_merge.mgf

Click mouse within plot area to zoom in by factor of two about that point

Or, Plot from  to  Da

Label all possible matches  Label matches used for scoring

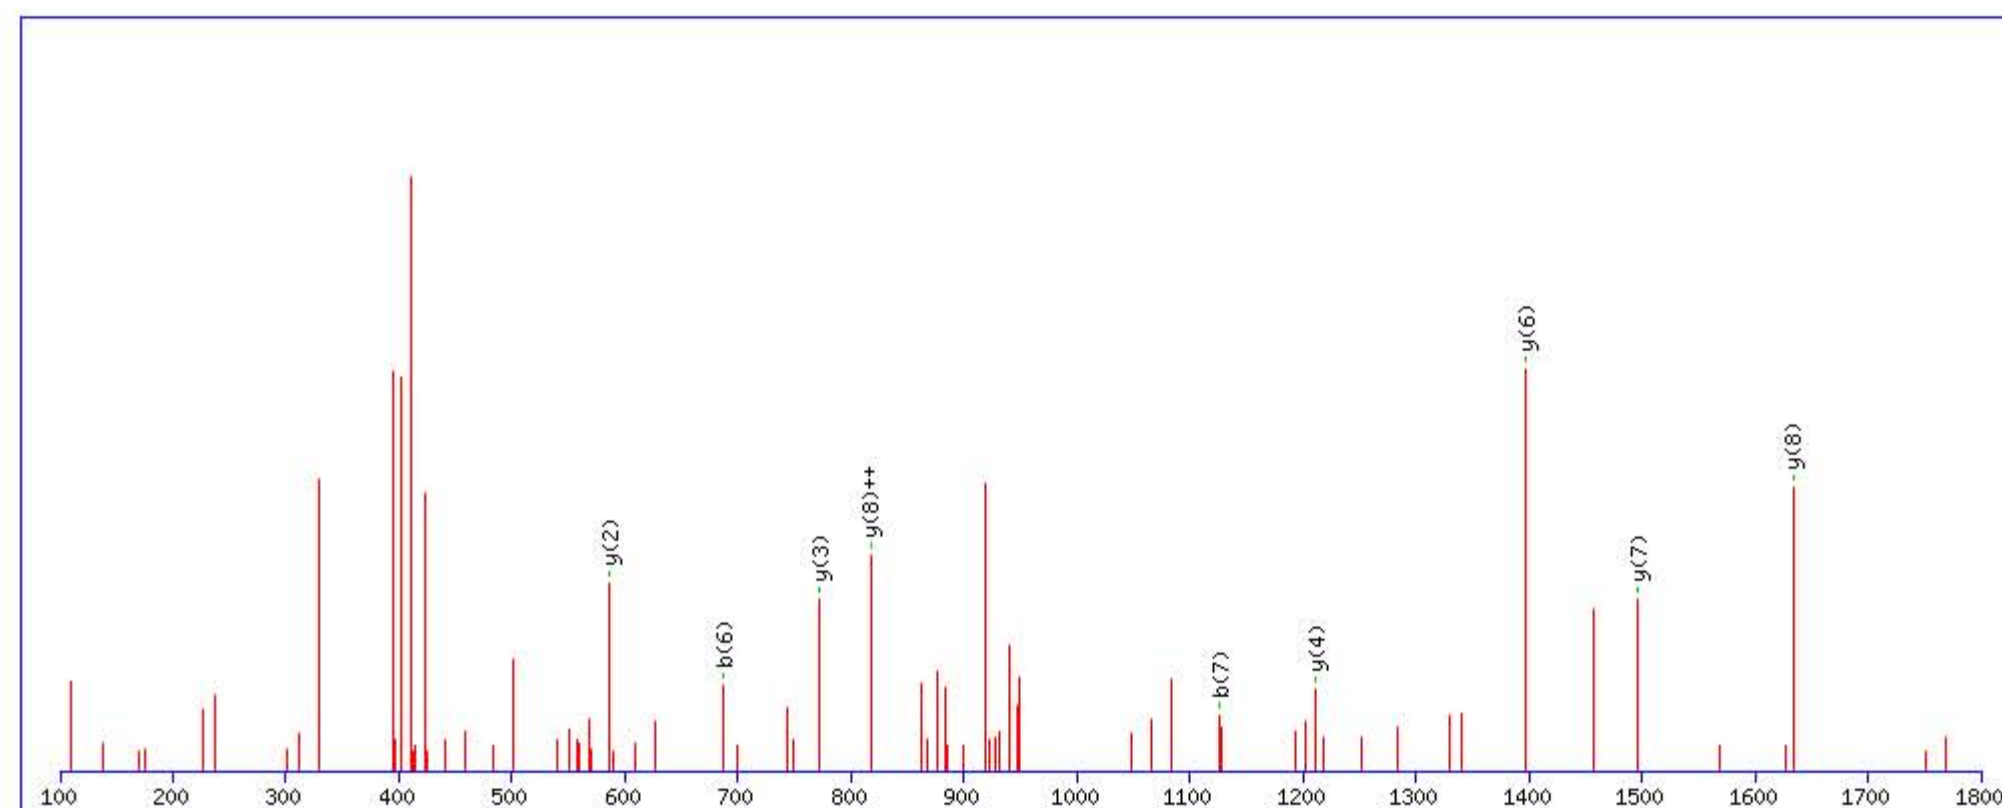

Monoisotopic mass of neutral peptide Mr(calc): 1896.937881

Fixed modifications: Carbamidomethyl (C) (apply to specified residues or termini only)

Variable modifications:

Q7 : Biotin:Thermo-21345 (Q)

Q9 : Biotin:Thermo-21345 (Q)

Ions Score: 26 Expect: 0.0055

Matches : 9/88 fragment ions using 17 most intense peaks [\(help\)](#)

| #  | b                  | b <sup>++</sup> | b <sup>*</sup> | b <sup>*++</sup> | b <sup>0</sup> | b <sup>0++</sup> | Seq. | y                  | y <sup>++</sup>   | y <sup>*</sup> | y <sup>*++</sup> | y <sup>0</sup> | y <sup>0++</sup> | #  |
|----|--------------------|-----------------|----------------|------------------|----------------|------------------|------|--------------------|-------------------|----------------|------------------|----------------|------------------|----|
| 1  | 102.054955         | 51.531116       |                |                  | 84.044390      | 42.525833        | T    |                    |                   |                |                  |                |                  | 10 |
| 2  | 265.118284         | 133.062780      |                |                  | 247.107719     | 124.057498       | Y    | 1796.897481        | 898.952379        | 1779.870932    | 890.439104       | 1778.886916    | 889.947096       | 9  |
| 3  | 402.177196         | 201.592236      |                |                  | 384.166631     | 192.586954       | H    | <b>1633.834152</b> | <b>817.420714</b> | 1616.807603    | 808.907440       | 1615.823587    | 808.415431       | 8  |
| 4  | 501.245610         | 251.126443      |                |                  | 483.235045     | 242.121161       | V    | <b>1496.775240</b> | 748.891258        | 1479.748691    | 740.377984       | 1478.764675    | 739.885975       | 7  |
| 5  | 558.267074         | 279.637175      |                |                  | 540.256509     | 270.631893       | G    | <b>1397.706826</b> | 699.357051        | 1380.680277    | 690.843776       | 1379.696261    | 690.351768       | 6  |
| 6  | <b>687.309667</b>  | 344.158472      |                |                  | 669.299102     | 335.153189       | E    | 1340.685362        | 670.846319        | 1323.658813    | 662.333045       | 1322.674797    | 661.841036       | 5  |
| 7  | <b>1126.534993</b> | 563.771135      | 1109.508444    | 555.257860       | 1108.524428    | 554.765852       | Q    | <b>1211.642769</b> | 606.325022        | 1194.616220    | 597.811748       |                |                  | 4  |
| 8  | 1312.614306        | 656.810791      | 1295.587757    | 648.297517       | 1294.603741    | 647.805508       | W    | <b>772.417443</b>  | 386.712360        | 755.390894     | 378.199085       |                |                  | 3  |
| 9  | 1751.839632        | 876.423454      | 1734.813083    | 867.910180       | 1733.829067    | 867.418171       | Q    | <b>586.338130</b>  | 293.672703        | 569.311581     | 285.159429       |                |                  | 2  |
| 10 |                    |                 |                |                  |                |                  | K    | 147.112804         | 74.060040         | 130.086255     | 65.546765        |                |                  | 1  |

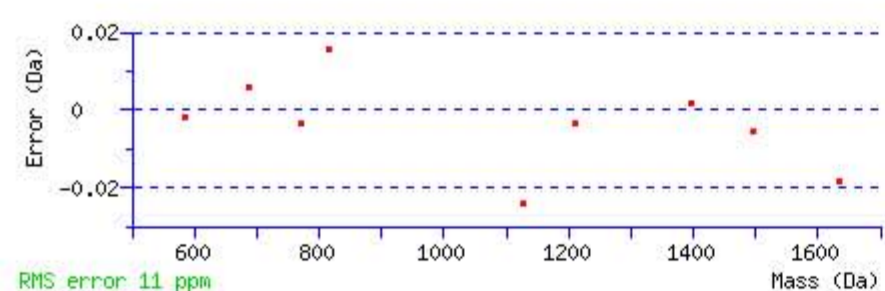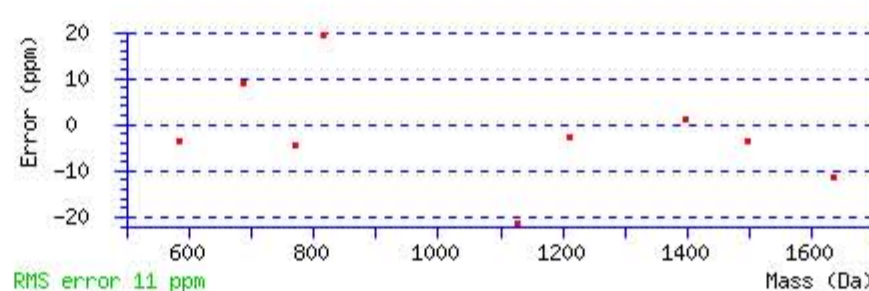

NCBI BLAST search of **TYHVGEQWQK**

(Parameters: blastp, nr protein database, expect=20000, no filter, PAM30)

Other BLAST [web gateways](#)

All matches to this query

| Score | Mr(calc):   | Delta     | Sequence                          |
|-------|-------------|-----------|-----------------------------------|
| 26.1  | 1896.937881 | 0.001027  | <a href="#">TYHVGEQWQK</a>        |
| 1.9   | 1896.947586 | -0.008678 | <a href="#">GATGDSHLLCTRKPEQK</a> |
| 0.8   | 1896.933640 | 0.005268  | <a href="#">QQGESNQERGARAR</a>    |

Mascot: <http://www.matrixscience.com/>



# MASCOT Search Results

## Peptide View

MS/MS Fragmentation of **LLCQCLGFGSGHFR**

Found in **FINC\_HUMAN**, Fibronectin OS=Homo sapiens GN=FN1 PE=1 SV=4

Match to Query 38589: 1961.929708 from(981.972130,2+) rtinseconds(2194) index(32996)

Title: Locus:1.1.1.3427.16 File:"2013-07-02 CLN FXIII 180 min 3rd F 3.wiff"

Data file C:\Program Files (x86)\Matrix Science\Mascot Daemon\mgf\9 FXIII 180 min 3rd\mascot\_daemon\_merge.mgf

Click mouse within plot area to zoom in by factor of two about that point

Or, Plot from  to  Da

Label all possible matches  Label matches used for scoring

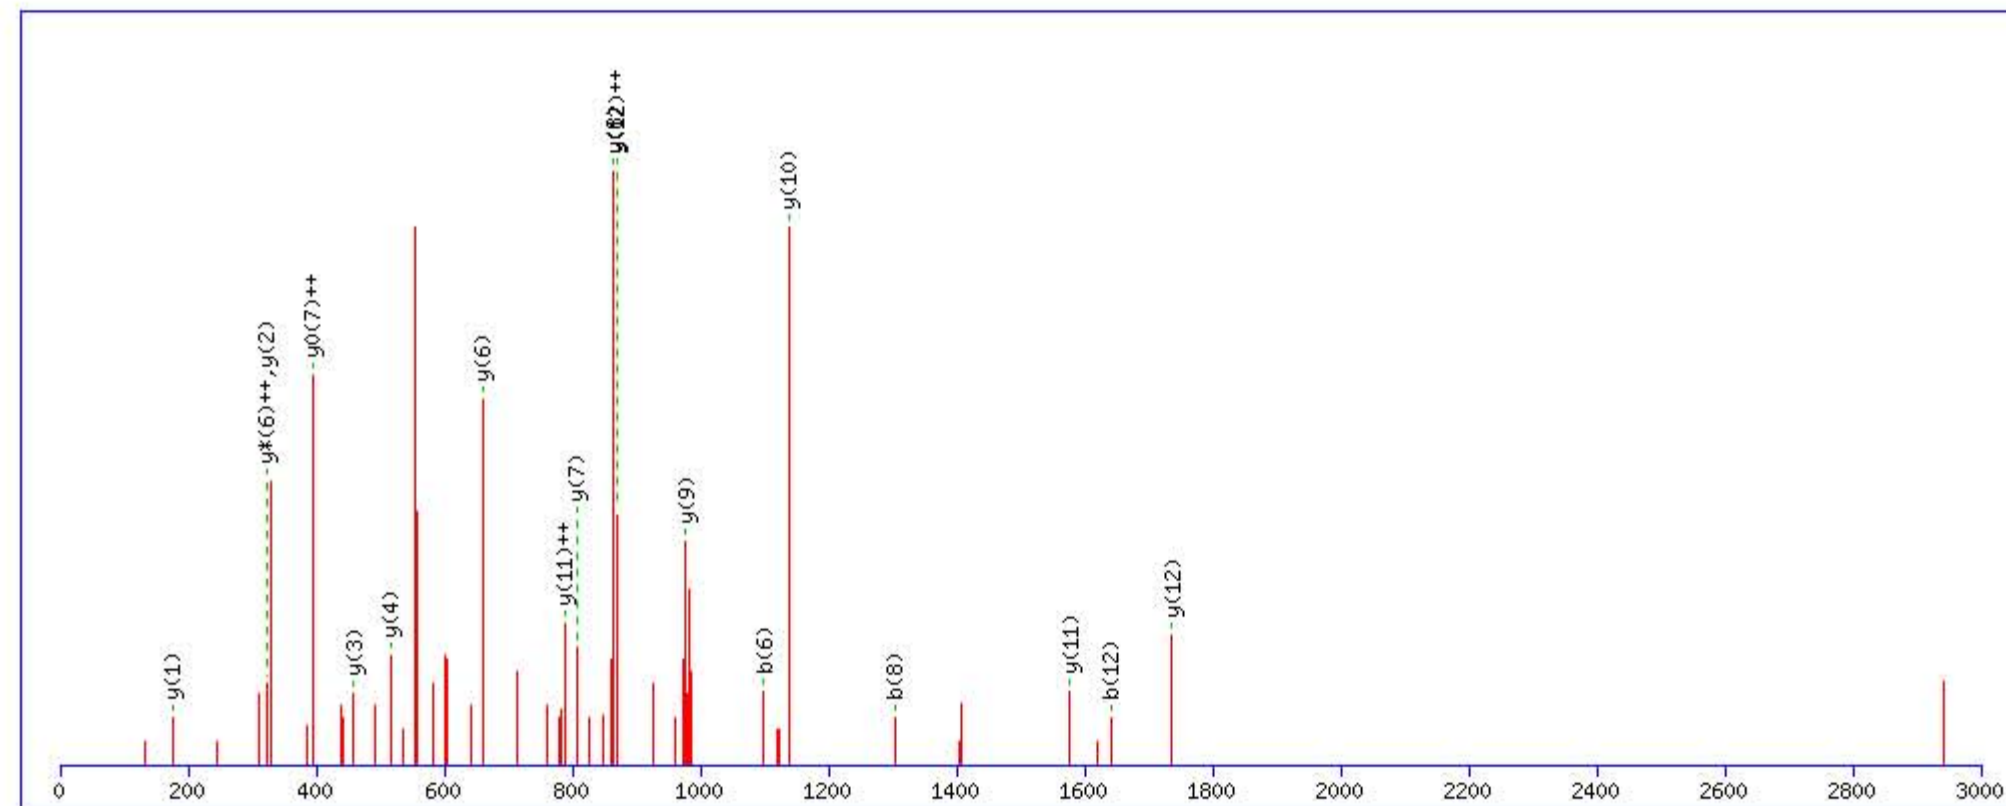

Monoisotopic mass of neutral peptide Mr(calc): 1961.942673

Fixed modifications: Carbamidomethyl (C) (apply to specified residues or termini only)

Variable modifications:

Q4 : Biotin:Thermo-21345 (Q)

Ions Score: 77 Expect: 1.1e-007

Matches : 18/124 fragment ions using 29 most intense peaks [\(help\)](#)

| #  | b                  | b <sup>++</sup> | b <sup>+</sup> | b <sup>+++</sup> | b <sup>0</sup> | b <sup>0++</sup> | Seq. | y                  | y <sup>++</sup>   | y <sup>+</sup> | y <sup>+++</sup>  | y <sup>0</sup> | y <sup>0++</sup>  | #  |
|----|--------------------|-----------------|----------------|------------------|----------------|------------------|------|--------------------|-------------------|----------------|-------------------|----------------|-------------------|----|
| 1  | 114.091340         | 57.549308       |                |                  |                |                  | L    |                    |                   |                |                   |                |                   | 14 |
| 2  | 227.175404         | 114.091340      |                |                  |                |                  | L    | 1849.865864        | 925.436570        | 1832.839315    | 916.923296        | 1831.855299    | 916.431288        | 13 |
| 3  | 387.206053         | 194.106664      |                |                  |                |                  | C    | <b>1736.781800</b> | <b>868.894538</b> | 1719.755251    | 860.381264        | 1718.771235    | 859.889255        | 12 |
| 4  | 826.431379         | 413.719328      | 809.404830     | 405.206053       |                |                  | Q    | <b>1576.751151</b> | <b>788.879213</b> | 1559.724602    | 780.365939        | 1558.740586    | 779.873931        | 11 |
| 5  | 986.462028         | 493.734652      | 969.435479     | 485.221378       |                |                  | C    | <b>1137.525825</b> | 569.266550        | 1120.499276    | 560.753276        | 1119.515260    | 560.261268        | 10 |
| 6  | <b>1099.546092</b> | 550.276684      | 1082.519543    | 541.763410       |                |                  | L    | <b>977.495176</b>  | 489.251226        | 960.468627     | 480.737952        | 959.484611     | 480.245944        | 9  |
| 7  | 1156.567556        | 578.787416      | 1139.541007    | 570.274142       |                |                  | G    | <b>864.411112</b>  | 432.709194        | 847.384563     | 424.195920        | 846.400547     | 423.703912        | 8  |
| 8  | <b>1303.635970</b> | 652.321623      | 1286.609421    | 643.808349       |                |                  | F    | <b>807.389648</b>  | 404.198462        | 790.363099     | 395.685188        | 789.379083     | <b>395.193180</b> | 7  |
| 9  | 1360.657434        | 680.832355      | 1343.630885    | 672.319081       |                |                  | G    | <b>660.321234</b>  | 330.664255        | 643.294685     | <b>322.150981</b> | 642.310669     | 321.658973        | 6  |
| 10 | 1447.689462        | 724.348369      | 1430.662913    | 715.835095       | 1429.678897    | 715.343087       | S    | 603.299770         | 302.153523        | 586.273221     | 293.640249        | 585.289205     | 293.148241        | 5  |
| 11 | 1504.710926        | 752.859101      | 1487.684377    | 744.345827       | 1486.700361    | 743.853818       | G    | <b>516.267742</b>  | 258.637509        | 499.241193     | 250.124235        |                |                   | 4  |
| 12 | <b>1641.769838</b> | 821.388557      | 1624.743289    | 812.875283       | 1623.759273    | 812.383274       | H    | <b>459.246278</b>  | 230.126777        | 442.219729     | 221.613502        |                |                   | 3  |
| 13 | 1788.838252        | 894.922764      | 1771.811703    | 886.409490       | 1770.827687    | 885.917482       | F    | <b>322.187366</b>  | 161.597321        | 305.160817     | 153.084047        |                |                   | 2  |
| 14 |                    |                 |                |                  |                |                  | R    | <b>175.118952</b>  | 88.063114         | 158.092403     | 79.549839         |                |                   | 1  |

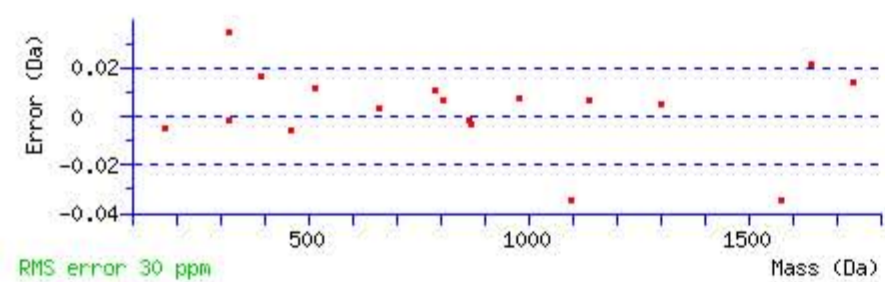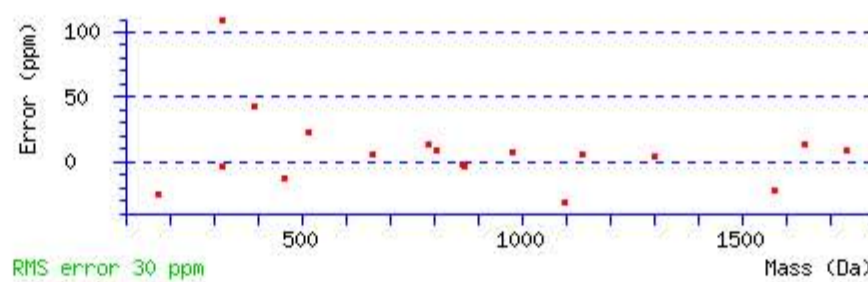

NCBI BLAST search of **LLCQCLGFGSGHFR**

(Parameters: blastp, nr protein database, expect=20000, no filter, PAM30)

Other BLAST [web gateways](#)

All matches to this query

| Score | Mr(calc):   | Delta     | Sequence                         |
|-------|-------------|-----------|----------------------------------|
| 76.6  | 1961.942673 | -0.012965 | <a href="#">LLCQCLGFGSGHFR</a>   |
| 2.3   | 1961.938614 | -0.008906 | <a href="#">HECMAPLTALVKHMHR</a> |

Mascot: <http://www.matrixscience.com/>

# MASCOT SEARCH RESULTS

## Peptide View

MS/MS Fragmentation of **YSFCTDHTVLVQTR**

Found in **FINC\_HUMAN**, Fibronectin OS=Homo sapiens GN=FN1 PE=1 SV=4

Match to Query 40520: 2036.975682 from(679.999170,3+) rtinseconds(2029) index(32064)

Title: Locus:1.1.1.3370.8 File:"2013-07-02 CLN FXIII 180 min 3rd F 3.wiff"

Data file C:\Program Files (x86)\Matrix Science\Mascot Daemon\mgf9 FXIII 180 min 3rd\mascot\_daemon\_merge.mgf

Click mouse within plot area to zoom in by factor of two about that point

Or, Plot from  to  Da

Label all possible matches  Label matches used for scoring

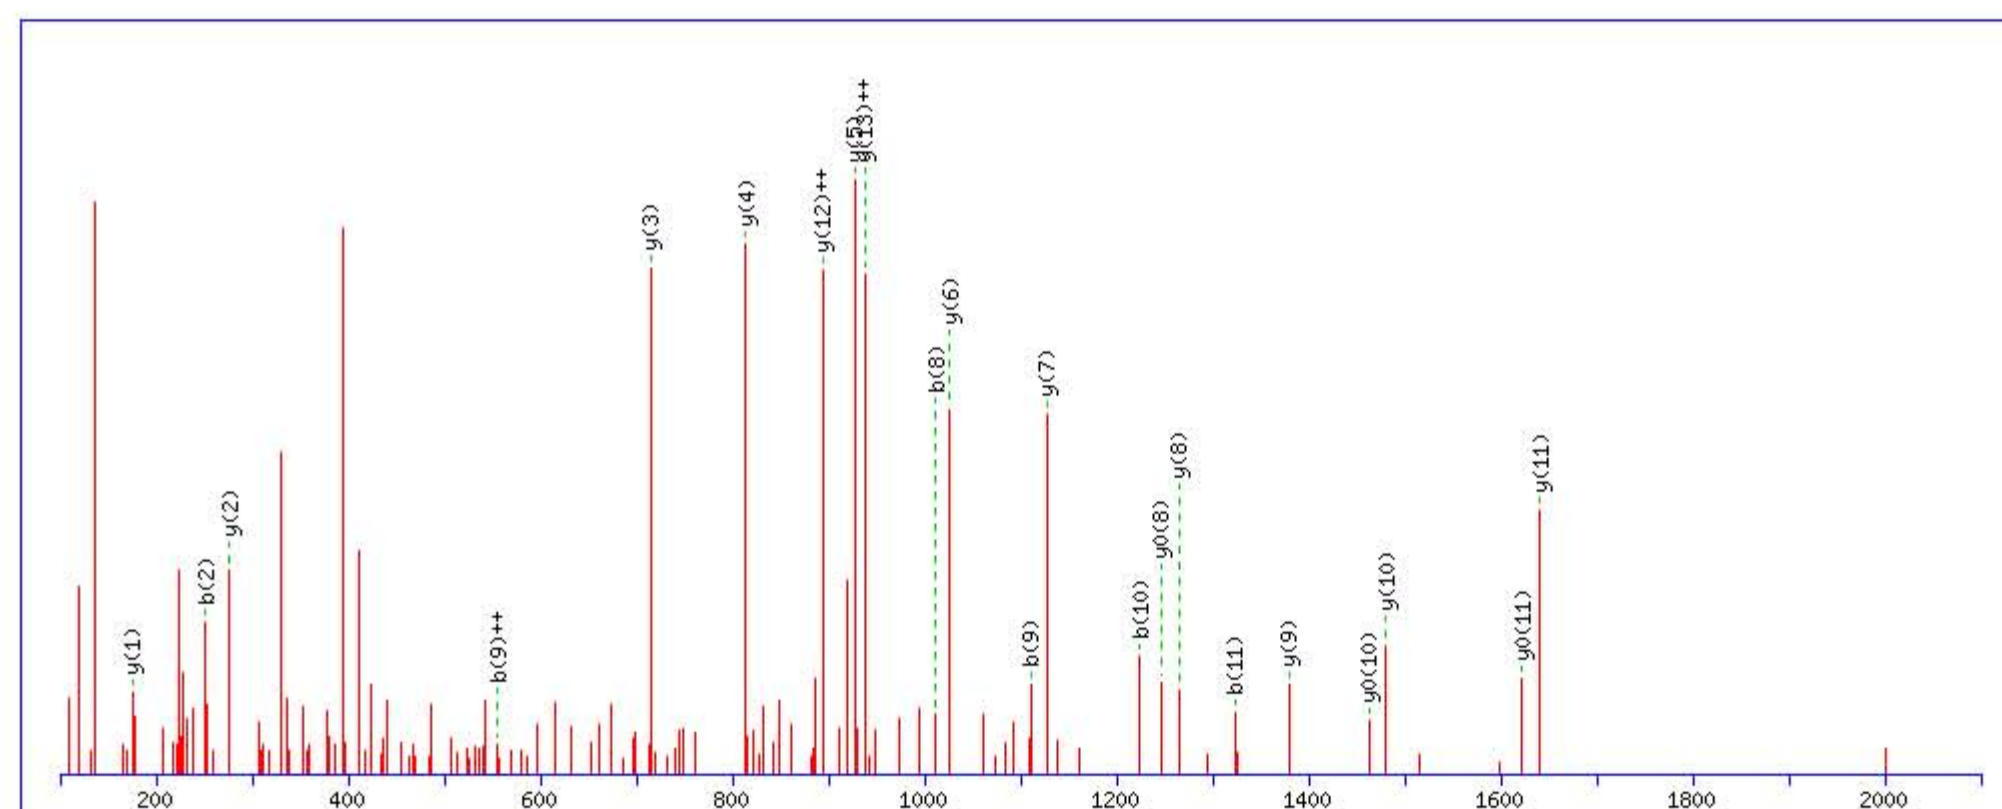

Monoisotopic mass of neutral peptide Mr(calc): 2036.981232

Fixed modifications: Carbamidomethyl (C) (apply to specified residues or termini only)

Variable modifications:

Q12 : Biotin:Thermo-21345 (Q)

Ions Score: 59 Expect: 2.7e-005

Matches : 22/130 fragment ions using 46 most intense peaks [\(help\)](#)

| #  | b                  | b <sup>++</sup>   | b <sup>*</sup> | b <sup>*++</sup> | b <sup>0</sup> | b <sup>0++</sup> | Seq. | y                  | y <sup>++</sup>   | y <sup>*</sup> | y <sup>*++</sup> | y <sup>0</sup>     | y <sup>0++</sup> | #  |
|----|--------------------|-------------------|----------------|------------------|----------------|------------------|------|--------------------|-------------------|----------------|------------------|--------------------|------------------|----|
| 1  | 164.070605         | 82.538940         |                |                  |                |                  | Y    |                    |                   |                |                  |                    |                  | 14 |
| 2  | <b>251.102633</b>  | 126.054954        |                |                  | 233.092068     | 117.049672       | S    | 1874.925153        | <b>937.966215</b> | 1857.898604    | 929.452940       | 1856.914588        | 928.960932       | 13 |
| 3  | 398.171047         | 199.589161        |                |                  | 380.160482     | 190.583879       | F    | 1787.893125        | <b>894.450201</b> | 1770.866576    | 885.936926       | 1769.882560        | 885.444918       | 12 |
| 4  | 558.201696         | 279.604486        |                |                  | 540.191131     | 270.599204       | C    | <b>1640.824711</b> | 820.915994        | 1623.798162    | 812.402719       | <b>1622.814146</b> | 811.910711       | 11 |
| 5  | 659.249375         | 330.128326        |                |                  | 641.238810     | 321.123043       | T    | <b>1480.794062</b> | 740.900669        | 1463.767513    | 732.387395       | <b>1462.783497</b> | 731.895387       | 10 |
| 6  | 774.276318         | 387.641797        |                |                  | 756.265753     | 378.636515       | D    | <b>1379.746383</b> | 690.376830        | 1362.719834    | 681.863555       | 1361.735818        | 681.371547       | 9  |
| 7  | 911.335230         | 456.171253        |                |                  | 893.324665     | 447.165971       | H    | <b>1264.719440</b> | 632.863358        | 1247.692891    | 624.350084       | <b>1246.708875</b> | 623.858076       | 8  |
| 8  | <b>1012.382909</b> | 506.695093        |                |                  | 994.372344     | 497.689810       | T    | <b>1127.660528</b> | 564.333902        | 1110.633979    | 555.820628       | 1109.649963        | 555.328620       | 7  |
| 9  | <b>1111.451323</b> | <b>556.229300</b> |                |                  | 1093.440758    | 547.224017       | V    | <b>1026.612849</b> | 513.810063        | 1009.586300    | 505.296788       | 1008.602284        | 504.804780       | 6  |
| 10 | <b>1224.535387</b> | 612.771331        |                |                  | 1206.524822    | 603.766049       | L    | <b>927.544435</b>  | 464.275856        | 910.517886     | 455.762581       | 909.533870         | 455.270573       | 5  |
| 11 | <b>1323.603801</b> | 662.305539        |                |                  | 1305.593236    | 653.300256       | V    | <b>814.460371</b>  | 407.733824        | 797.433822     | 399.220549       | 796.449806         | 398.728541       | 4  |
| 12 | 1762.829127        | 881.918202        | 1745.802578    | 873.404927       | 1744.818562    | 872.912919       | Q    | <b>715.391957</b>  | 358.199617        | 698.365408     | 349.686342       | 697.381392         | 349.194334       | 3  |
| 13 | 1863.876806        | 932.442041        | 1846.850257    | 923.928767       | 1845.866241    | 923.436759       | T    | <b>276.166631</b>  | 138.586953        | 259.140082     | 130.073679       | 258.156066         | 129.581671       | 2  |
| 14 |                    |                   |                |                  |                |                  | R    | <b>175.118952</b>  | 88.063114         | 158.092403     | 79.549839        |                    |                  | 1  |

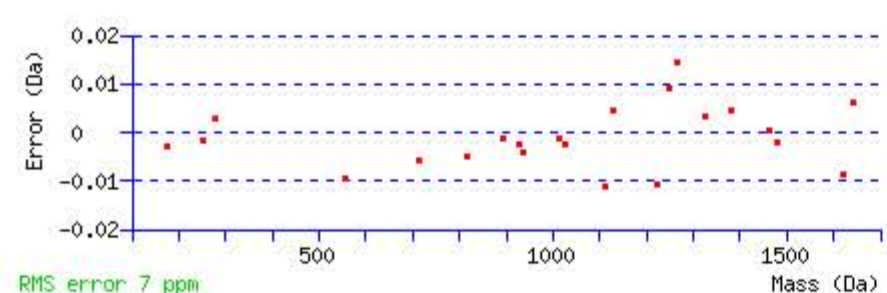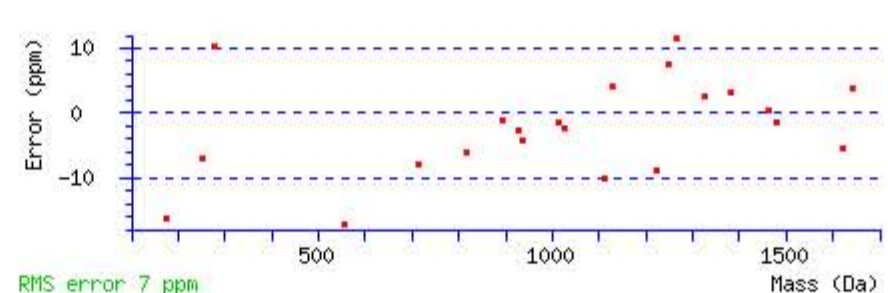

NCBI BLAST search of [YSFCTDHTVLVQTR](#)

(Parameters: blastp, nr protein database, expect=20000, no filter, PAM30)

Other BLAST [web gateways](#)

All matches to this query

| Score | Mr(calc):   | Delta     | Sequence                       |
|-------|-------------|-----------|--------------------------------|
| 58.9  | 2036.981232 | -0.005550 | <a href="#">YSFCTDHTVLVQTR</a> |

Mascot: <http://www.matrixscience.com/>

# MASCOT Search Results

## Peptide View

MS/MS Fragmentation of **HTSVQTTSSGSGPFTDVR**

Found in **FINC\_HUMAN**, Fibronectin OS=Homo sapiens GN=FN1 PE=1 SV=4

Match to Query 42784: 2174.033832 from(725.685220,3+) rtinseconds(1691) index(29953)

Title: Locus:1.1.1.3252.7 File:"2013-07-02 CLN FXIII 180 min 3rd F 3.wiff"

Data file C:\Program Files (x86)\Matrix Science\Mascot Daemon\mgf9 FXIII 180 min 3rd\mascot\_daemon\_merge.mgf

Click mouse within plot area to zoom in by factor of two about that point

Or, Plot from  to  Da

Label all possible matches  Label matches used for scoring

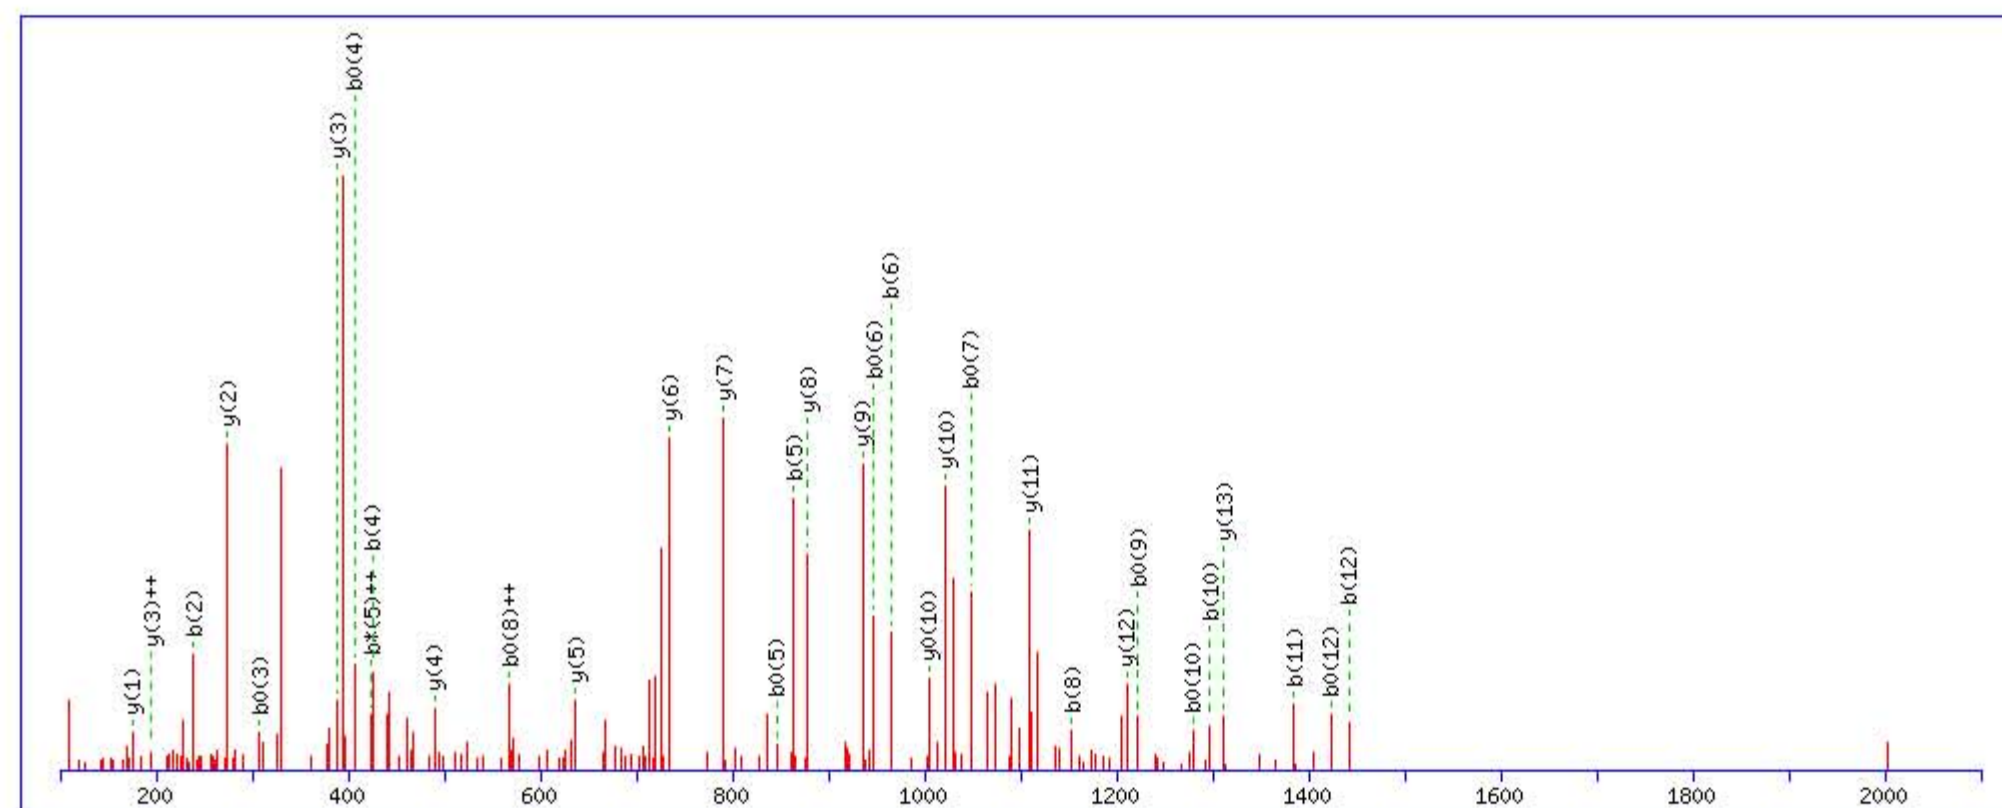

Monoisotopic mass of neutral peptide Mr(calc): 2174.042664

Fixed modifications: Carbamidomethyl (C) (apply to specified residues or termini only)

Variable modifications:

Q5 : Biotin:Thermo-21345 (Q)

Ions Score: 82 Expect: 1.1e-007

Matches : 33/190 fragment ions using 56 most intense peaks [\(help\)](#)

| #  | b                  | b <sup>++</sup> | b <sup>*</sup> | b <sup>***</sup>  | b <sup>0</sup>     | b <sup>0++</sup>  | Seq. | y                  | y <sup>++</sup>   | y <sup>*</sup> | y <sup>***</sup> | y <sup>0</sup>     | y <sup>0++</sup> | #  |
|----|--------------------|-----------------|----------------|-------------------|--------------------|-------------------|------|--------------------|-------------------|----------------|------------------|--------------------|------------------|----|
| 1  | 138.066188         | 69.536732       |                |                   |                    |                   | H    |                    |                   |                |                  |                    |                  | 18 |
| 2  | <b>239.113867</b>  | 120.060571      |                |                   | 221.103302         | 111.055289        | T    | 2037.990983        | 1019.499130       | 2020.964434    | 1010.985855      | 2019.980418        | 1010.493847      | 17 |
| 3  | 326.145895         | 163.576585      |                |                   | <b>308.135330</b>  | 154.571303        | S    | 1936.943304        | 968.975290        | 1919.916755    | 960.462016       | 1918.932739        | 959.970008       | 16 |
| 4  | <b>425.214309</b>  | 213.110792      |                |                   | <b>407.203744</b>  | 204.105510        | V    | 1849.911276        | 925.459276        | 1832.884727    | 916.946002       | 1831.900711        | 916.453994       | 15 |
| 5  | <b>864.439635</b>  | 432.723456      | 847.413086     | <b>424.210181</b> | <b>846.429070</b>  | 423.718173        | Q    | 1750.842862        | 875.925069        | 1733.816313    | 867.411795       | 1732.832297        | 866.919787       | 14 |
| 6  | <b>965.487314</b>  | 483.247295      | 948.460765     | 474.734021        | <b>947.476749</b>  | 474.242013        | T    | <b>1311.617536</b> | 656.312406        | 1294.590987    | 647.799132       | 1293.606971        | 647.307124       | 13 |
| 7  | 1066.534993        | 533.771135      | 1049.508444    | 525.257860        | <b>1048.524428</b> | 524.765852        | T    | <b>1210.569857</b> | 605.788567        | 1193.543308    | 597.275292       | 1192.559292        | 596.783284       | 12 |
| 8  | <b>1153.567021</b> | 577.287149      | 1136.540472    | 568.773874        | 1135.556456        | <b>568.281866</b> | S    | <b>1109.522178</b> | 555.264727        | 1092.495629    | 546.751453       | 1091.511613        | 546.259445       | 11 |
| 9  | 1240.599049        | 620.803163      | 1223.572500    | 612.289888        | <b>1222.588484</b> | 611.797880        | S    | <b>1022.490150</b> | 511.748713        | 1005.463601    | 503.235439       | <b>1004.479585</b> | 502.743431       | 10 |
| 10 | <b>1297.620513</b> | 649.313895      | 1280.593964    | 640.800620        | <b>1279.609948</b> | 640.308612        | G    | <b>935.458122</b>  | 468.232699        | 918.431573     | 459.719425       | 917.447557         | 459.227417       | 9  |
| 11 | <b>1384.652541</b> | 692.829909      | 1367.625992    | 684.316634        | 1366.641976        | 683.824626        | S    | <b>878.436658</b>  | 439.721967        | 861.410109     | 431.208693       | 860.426093         | 430.716685       | 8  |
| 12 | <b>1441.674005</b> | 721.340641      | 1424.647456    | 712.827366        | <b>1423.663440</b> | 712.335358        | G    | <b>791.404630</b>  | 396.205953        | 774.378081     | 387.692679       | 773.394065         | 387.200671       | 7  |
| 13 | 1538.726769        | 769.867023      | 1521.700220    | 761.353748        | 1520.716204        | 760.861740        | P    | <b>734.383166</b>  | 367.695221        | 717.356617     | 359.181947       | 716.372601         | 358.689939       | 6  |
| 14 | 1685.795183        | 843.401230      | 1668.768634    | 834.887955        | 1667.784618        | 834.395947        | F    | <b>637.330402</b>  | 319.168839        | 620.303853     | 310.655565       | 619.319837         | 310.163557       | 5  |
| 15 | 1786.842862        | 893.925069      | 1769.816313    | 885.411795        | 1768.832297        | 884.919787        | T    | <b>490.261988</b>  | 245.634632        | 473.235439     | 237.121358       | 472.251423         | 236.629350       | 4  |
| 16 | 1901.869805        | 951.438541      | 1884.843256    | 942.925266        | 1883.859240        | 942.433258        | D    | <b>389.214309</b>  | <b>195.110793</b> | 372.187760     | 186.597518       | 371.203744         | 186.105510       | 3  |
| 17 | 2000.938219        | 1000.972748     | 1983.911670    | 992.459473        | 1982.927654        | 991.967465        | V    | <b>274.187366</b>  | 137.597321        | 257.160817     | 129.084047       |                    |                  | 2  |
| 18 |                    |                 |                |                   |                    |                   | R    | <b>175.118952</b>  | 88.063114         | 158.092403     | 79.549839        |                    |                  | 1  |

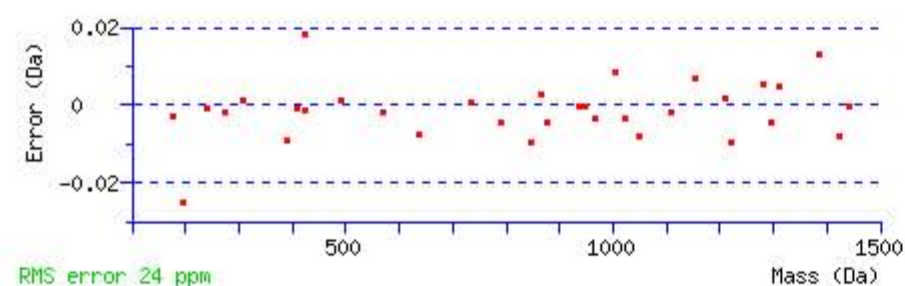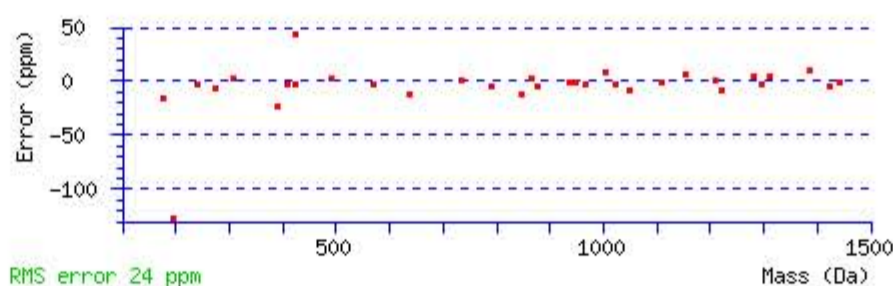

NCBI BLAST search of [HTSVQTTSSGSGPFTDVR](#)

(Parameters: blastp, nr protein database, expect=20000, no filter, PAM30)

Other BLAST [web gateways](#)

All matches to this query

| Score | Mr(calc):   | Delta     | Sequence                           |
|-------|-------------|-----------|------------------------------------|
| 82.2  | 2174.042664 | -0.008832 | <a href="#">HTSVQTTSSGSGPFTDVR</a> |

Mascot: <http://www.matrixscience.com/>

# MASCOT Search Results

## Peptide View

MS/MS Fragmentation of **QDGHLWCSTTSNYEQDQK**

Found in **FINC\_HUMAN**, Fibronectin OS=Homo sapiens GN=FN1 PE=1 SV=4

Match to Query 48602: 2507.077272 from(836.699700,3+) rtinseconds(1804) index(30627)

Title: Locus:1.1.1.3291.22 File:"2013-07-02 CLN FXIII 180 min 3rd F 3.wiff"

Data file C:\Program Files (x86)\Matrix Science\Mascot Daemon\mgf\9 FXIII 180 min 3rd\mascot\_daemon\_merge.mgf

Click mouse within plot area to zoom in by factor of two about that point

Or, Plot from  to  Da

Label all possible matches  Label matches used for scoring

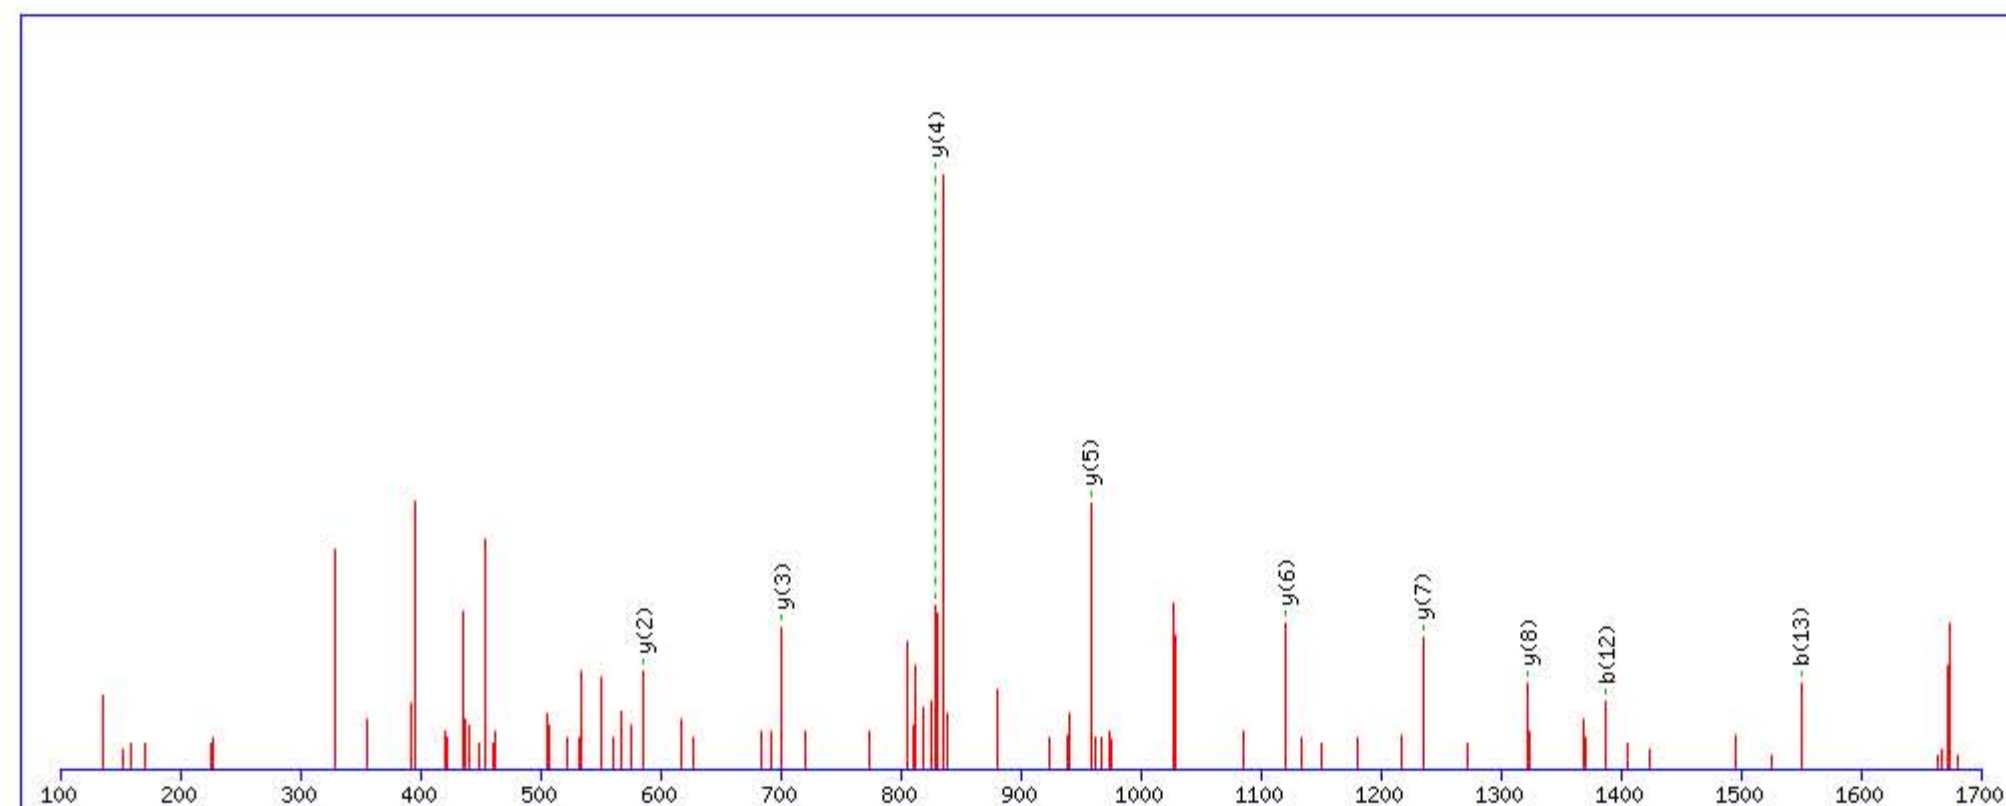

Monoisotopic mass of neutral peptide Mr(calc): 2507.084564

Fixed modifications: Carbamidomethyl (C) (apply to specified residues or termini only)

Variable modifications:

Q17 : Biotin:Thermo-21345 (Q)

Ions Score: 34 Expect: 0.0014

Matches : 9/198 fragment ions using 16 most intense peaks [\(help\)](#)

| #  | b                  | b <sup>++</sup> | b <sup>+</sup> | b <sup>+++</sup> | b <sup>0</sup> | b <sup>0++</sup> | Seq. | y                  | y <sup>++</sup> | y <sup>+</sup> | y <sup>+++</sup> | y <sup>0</sup> | y <sup>0++</sup> | #  |
|----|--------------------|-----------------|----------------|------------------|----------------|------------------|------|--------------------|-----------------|----------------|------------------|----------------|------------------|----|
| 1  | 129.065854         | 65.036565       | 112.039305     | 56.523291        |                |                  | Q    |                    |                 |                |                  |                |                  | 18 |
| 2  | 244.092797         | 122.550037      | 227.066248     | 114.036762       | 226.082232     | 113.544754       | D    | 2380.033259        | 1190.520267     | 2363.006710    | 1182.006993      | 2362.022694    | 1181.514985      | 17 |
| 3  | 301.114261         | 151.060768      | 284.087712     | 142.547494       | 283.103696     | 142.055486       | G    | 2265.006316        | 1133.006796     | 2247.979767    | 1124.493521      | 2246.995751    | 1124.001513      | 16 |
| 4  | 438.173173         | 219.590224      | 421.146624     | 211.076950       | 420.162608     | 210.584942       | H    | 2207.984852        | 1104.496064     | 2190.958303    | 1095.982789      | 2189.974287    | 1095.490781      | 15 |
| 5  | 551.257237         | 276.132257      | 534.230688     | 267.618982       | 533.246672     | 267.126974       | L    | 2070.925940        | 1035.966608     | 2053.899391    | 1027.453333      | 2052.915375    | 1026.961325      | 14 |
| 6  | 737.336550         | 369.171913      | 720.310001     | 360.658639       | 719.325985     | 360.166631       | W    | 1957.841876        | 979.424576      | 1940.815327    | 970.911302       | 1939.831311    | 970.419294       | 13 |
| 7  | 897.367199         | 449.187238      | 880.340650     | 440.673963       | 879.356634     | 440.181955       | C    | 1771.762563        | 886.384920      | 1754.736014    | 877.871645       | 1753.751998    | 877.379637       | 12 |
| 8  | 984.399227         | 492.703252      | 967.372678     | 484.189977       | 966.388662     | 483.697969       | S    | 1611.731914        | 806.369595      | 1594.705365    | 797.856321       | 1593.721349    | 797.364313       | 11 |
| 9  | 1085.446906        | 543.227091      | 1068.420357    | 534.713817       | 1067.436341    | 534.221808       | T    | 1524.699886        | 762.853581      | 1507.673337    | 754.340307       | 1506.689321    | 753.848299       | 10 |
| 10 | 1186.494585        | 593.750930      | 1169.468036    | 585.237656       | 1168.484020    | 584.745648       | T    | 1423.652207        | 712.329742      | 1406.625658    | 703.816467       | 1405.641642    | 703.324459       | 9  |
| 11 | 1273.526613        | 637.266945      | 1256.500064    | 628.753670       | 1255.516048    | 628.261662       | S    | <b>1322.604528</b> | 661.805902      | 1305.577979    | 653.292628       | 1304.593963    | 652.800620       | 8  |
| 12 | <b>1387.569540</b> | 694.288408      | 1370.542991    | 685.775134       | 1369.558975    | 685.283125       | N    | <b>1235.572500</b> | 618.289888      | 1218.545951    | 609.776614       | 1217.561935    | 609.284606       | 7  |
| 13 | <b>1550.632869</b> | 775.820073      | 1533.606320    | 767.306798       | 1532.622304    | 766.814790       | Y    | <b>1121.529573</b> | 561.268425      | 1104.503024    | 552.755150       | 1103.519008    | 552.263142       | 6  |
| 14 | 1679.675462        | 840.341369      | 1662.648913    | 831.828095       | 1661.664897    | 831.336086       | E    | <b>958.466244</b>  | 479.736760      | 941.439695     | 471.223486       | 940.455679     | 470.731478       | 5  |
| 15 | 1807.734040        | 904.370658      | 1790.707491    | 895.857384       | 1789.723475    | 895.365376       | Q    | <b>829.423651</b>  | 415.215464      | 812.397102     | 406.702189       | 811.413086     | 406.210181       | 4  |
| 16 | 1922.760983        | 961.884130      | 1905.734434    | 953.370855       | 1904.750418    | 952.878847       | D    | <b>701.365073</b>  | 351.186175      | 684.338524     | 342.672900       | 683.354508     | 342.180892       | 3  |
| 17 | 2361.986309        | 1181.496792     | 2344.959760    | 1172.983518      | 2343.975744    | 1172.491510      | Q    | <b>586.338130</b>  | 293.672703      | 569.311581     | 285.159429       |                |                  | 2  |
| 18 |                    |                 |                |                  |                |                  | K    | 147.112804         | 74.060040       | 130.086255     | 65.546765        |                |                  | 1  |

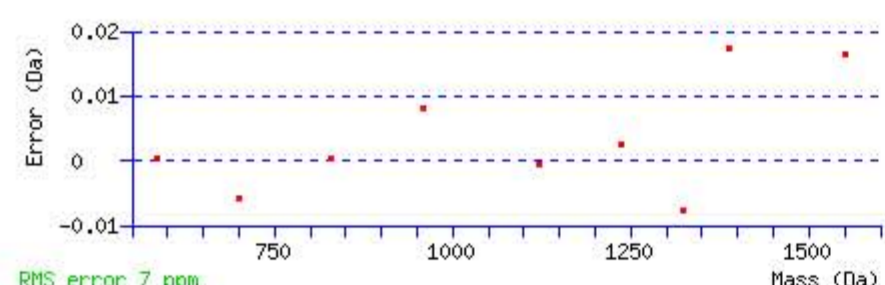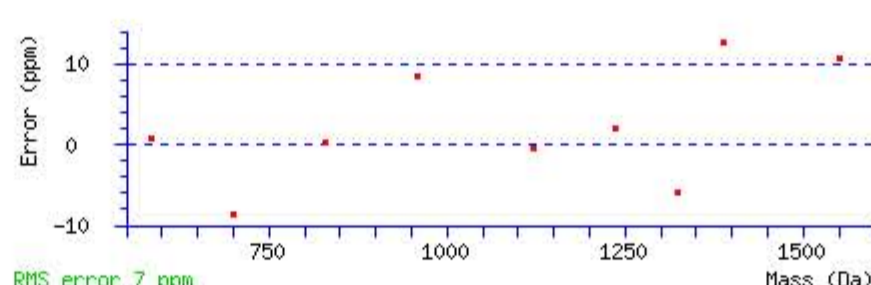

NCBI BLAST search of **QDGHLWCSTTSNYEQDQK**

(Parameters: blastp, nr protein database, expect=20000, no filter, PAM30)

Other BLAST [web gateways](#)

All matches to this query

| Score | Mr(calc):   | Delta     | Sequence                           |
|-------|-------------|-----------|------------------------------------|
| 34.5  | 2507.084564 | -0.007292 | <a href="#">QDGHLWCSTTSNYEQDQK</a> |
| 16.7  | 2507.084564 | -0.007292 | <a href="#">QDGHLWCSTTSNYEQDQK</a> |

# MASCOT Search Results

## Peptide View

MS/MS Fragmentation of **RPGGEPSPGTTGQSYNQYSQR**

Found in **FINC\_HUMAN**, Fibronectin OS=Homo sapiens GN=FN1 PE=1 SV=4

Match to Query 50403: 2706.237522 from(903.086450,3+) rtinseconds(1560) index(29154)

Title: Locus:1.1.1.3206.15 File:"2013-07-02 CLN FXIII 180 min 3rd F 3.wiff"

Data file C:\Program Files (x86)\Matrix Science\Mascot Daemon\mgf9 FXIII 180 min 3rd\mascot\_daemon\_merge.mgf

Click mouse within plot area to zoom in by factor of two about that point

Or, Plot from  to  Da

Label all possible matches  Label matches used for scoring

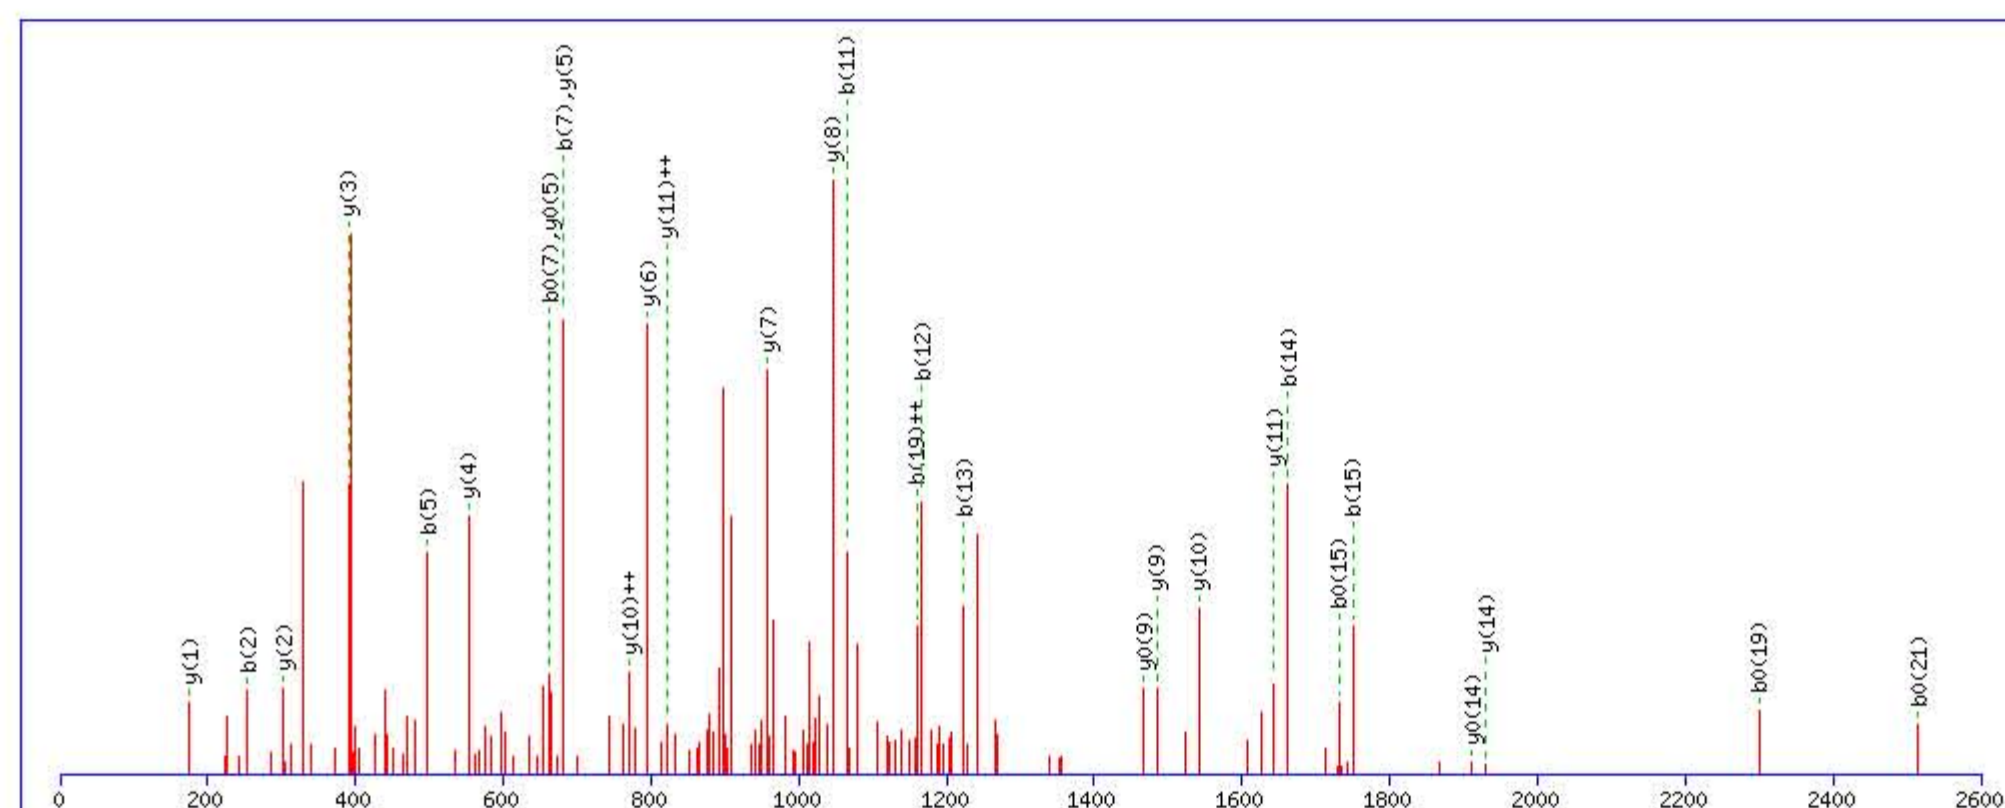

Monoisotopic mass of neutral peptide Mr(calc): 2706.245621

Fixed modifications: Carbamidomethyl (C) (apply to specified residues or termini only)

Variable modifications:

Q14 : Biotin:Thermo-21345 (Q)

Ions Score: 87 Expect: 2.3e-008

Matches : 30/240 fragment ions using 36 most intense peaks [\(help\)](#)

| #  | b                  | b <sup>++</sup>    | b <sup>*</sup> | b <sup>*++</sup> | b <sup>0</sup>     | b <sup>0++</sup> | Seq. | y                  | y <sup>++</sup>   | y <sup>*</sup> | y <sup>*++</sup> | y <sup>0</sup>     | y <sup>0++</sup> | #  |
|----|--------------------|--------------------|----------------|------------------|--------------------|------------------|------|--------------------|-------------------|----------------|------------------|--------------------|------------------|----|
| 1  | 157.108387         | 79.057831          | 140.081838     | 70.544557        |                    |                  | R    |                    |                   |                |                  |                    |                  | 22 |
| 2  | <b>254.161151</b>  | 127.584213         | 237.134602     | 119.070939       |                    |                  | P    | 2551.151795        | 1276.079535       | 2534.125246    | 1267.566261      | 2533.141230        | 1267.074253      | 21 |
| 3  | 311.182615         | 156.094945         | 294.156066     | 147.581671       |                    |                  | G    | 2454.099031        | 1227.553153       | 2437.072482    | 1219.039879      | 2436.088466        | 1218.547871      | 20 |
| 4  | 368.204079         | 184.605677         | 351.177530     | 176.092403       |                    |                  | G    | 2397.077567        | 1199.042421       | 2380.051018    | 1190.529147      | 2379.067002        | 1190.037139      | 19 |
| 5  | <b>497.246672</b>  | 249.126974         | 480.220123     | 240.613700       | 479.236107         | 240.121692       | E    | 2340.056103        | 1170.531689       | 2323.029554    | 1162.018415      | 2322.045538        | 1161.526407      | 18 |
| 6  | 594.299436         | 297.653356         | 577.272887     | 289.140082       | 576.288871         | 288.648074       | P    | 2211.013510        | 1106.010393       | 2193.986961    | 1097.497118      | 2193.002945        | 1097.005110      | 17 |
| 7  | <b>681.331464</b>  | 341.169370         | 664.304915     | 332.656095       | <b>663.320899</b>  | 332.164087       | S    | 2113.960746        | 1057.484011       | 2096.934197    | 1048.970736      | 2095.950181        | 1048.478728      | 16 |
| 8  | 778.384228         | 389.695752         | 761.357679     | 381.182478       | 760.373663         | 380.690470       | P    | 2026.928718        | 1013.967997       | 2009.902169    | 1005.454723      | 2008.918153        | 1004.962715      | 15 |
| 9  | 907.426821         | 454.217049         | 890.400272     | 445.703774       | 889.416256         | 445.211766       | E    | <b>1929.875954</b> | 965.441615        | 1912.849405    | 956.928341       | <b>1911.865389</b> | 956.436333       | 14 |
| 10 | 964.448285         | 482.727781         | 947.421736     | 474.214506       | 946.437720         | 473.722498       | G    | 1800.833361        | 900.920319        | 1783.806812    | 892.407044       | 1782.822796        | 891.915036       | 13 |
| 11 | <b>1065.495964</b> | 533.251620         | 1048.469415    | 524.738346       | 1047.485399        | 524.246337       | T    | 1743.811897        | 872.409587        | 1726.785348    | 863.896312       | 1725.801332        | 863.404304       | 12 |
| 12 | <b>1166.543643</b> | 583.775460         | 1149.517094    | 575.262185       | 1148.533078        | 574.770177       | T    | <b>1642.764218</b> | <b>821.885747</b> | 1625.737669    | 813.372473       | 1624.753653        | 812.880465       | 11 |
| 13 | <b>1223.565107</b> | 612.286191         | 1206.538558    | 603.772917       | 1205.554542        | 603.280909       | G    | <b>1541.716539</b> | <b>771.361908</b> | 1524.689990    | 762.848633       | 1523.705974        | 762.356625       | 10 |
| 14 | <b>1662.790433</b> | 831.898854         | 1645.763884    | 823.385580       | 1644.779868        | 822.893572       | Q    | <b>1484.695075</b> | 742.851176        | 1467.668526    | 734.337901       | <b>1466.684510</b> | 733.845893       | 9  |
| 15 | <b>1749.822461</b> | 875.414869         | 1732.795912    | 866.901594       | <b>1731.811896</b> | 866.409586       | S    | <b>1045.469749</b> | 523.238513        | 1028.443200    | 514.725238       | 1027.459184        | 514.233230       | 8  |
| 16 | 1912.885790        | 956.946533         | 1895.859241    | 948.433259       | 1894.875225        | 947.941251       | Y    | <b>958.437721</b>  | 479.722499        | 941.411172     | 471.209224       | 940.427156         | 470.717216       | 7  |
| 17 | 2026.928717        | 1013.967997        | 2009.902168    | 1005.454722      | 2008.918152        | 1004.962714      | N    | <b>795.374392</b>  | 398.190834        | 778.347843     | 389.677560       | 777.363827         | 389.185552       | 6  |
| 18 | 2154.987295        | 1077.997285        | 2137.960746    | 1069.484011      | 2136.976730        | 1068.992003      | Q    | <b>681.331465</b>  | 341.169371        | 664.304916     | 332.656096       | <b>663.320900</b>  | 332.164088       | 5  |
| 19 | 2318.050624        | <b>1159.528950</b> | 2301.024075    | 1151.015675      | <b>2300.040059</b> | 1150.523667      | Y    | <b>553.272887</b>  | 277.140082        | 536.246338     | 268.626807       | 535.262322         | 268.134799       | 4  |
| 20 | 2405.082652        | 1203.044964        | 2388.056103    | 1194.531689      | 2387.072087        | 1194.039681      | S    | <b>390.209558</b>  | 195.608417        | 373.183009     | 187.095143       | 372.198993         | 186.603135       | 3  |
| 21 | 2533.141230        | 1267.074253        | 2516.114681    | 1258.560978      | <b>2515.130665</b> | 1258.068971      | Q    | <b>303.177530</b>  | 152.092403        | 286.150981     | 143.579129       |                    |                  | 2  |
| 22 |                    |                    |                |                  |                    |                  | R    | <b>175.118952</b>  | 88.063114         | 158.092403     | 79.549839        |                    |                  | 1  |

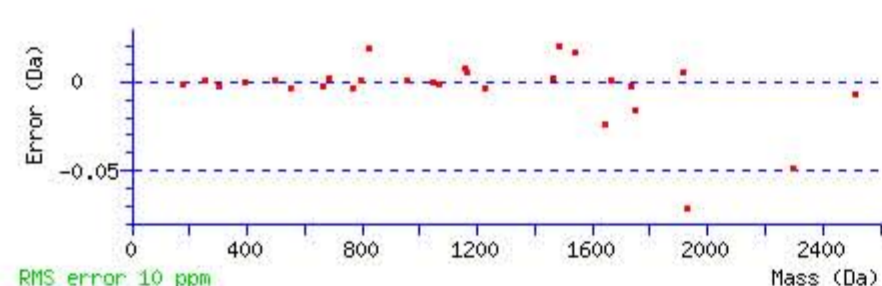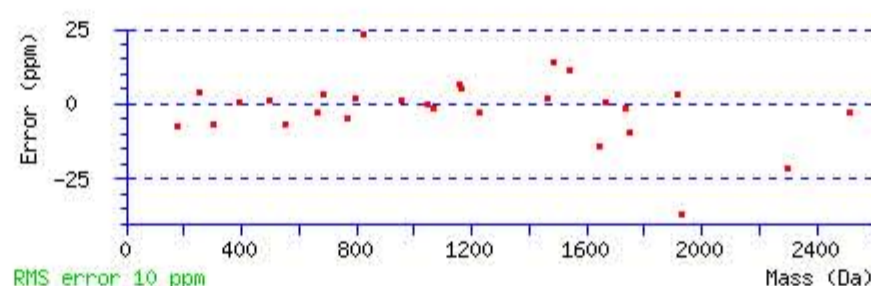

NCBI BLAST search of **RPGGEPSPGTTGQSYNQYSQR**

(Parameters: blastp, nr protein database, expect=20000, no filter, PAM30)

Other BLAST [web gateways](#)

All matches to this query

| Score | Mr(calc):   | Delta     | Sequence                              |
|-------|-------------|-----------|---------------------------------------|
| 87.1  | 2706.245621 | -0.008099 | <a href="#">RPGGEPSPGTTGQSYNQYSQR</a> |
| 58.5  | 2706.245621 | -0.008099 | <a href="#">RPGGEPSPGTTGQSYNQYSQR</a> |
| 38.3  | 2706.245621 | -0.008099 | <a href="#">RPGGEPSPGTTGQSYNQYSQR</a> |

**MASCOT** Mascot Search Results

**Peptide View**

MS/MS Fragmentation of **TEIDKPSQM<sup>Q</sup>VTDVQDNSISVK**  
 Found in **FINC\_HUMAN**, Fibronectin OS=Homo sapiens GN=FN1 PE=1 SV=4

Match to Query 51217: 2772.363312 from(925.128380,3+) rtinseconds(1982) index(31727)  
 Title: Locus:1.1.1.3353.24 File:"2013-07-02 CLN FXIII 180 min 3rd F 3.wiff"  
 Data file C:\Program Files (x86)\Matrix Science\Mascot Daemon\mgf\9 FXIII 180 min 3rd\mascot\_daemon\_merge.mgf

Click mouse within plot area to zoom in by factor of two about that point  
 Or, Plot from  to  Da   
 Label all possible matches  Label matches used for scoring

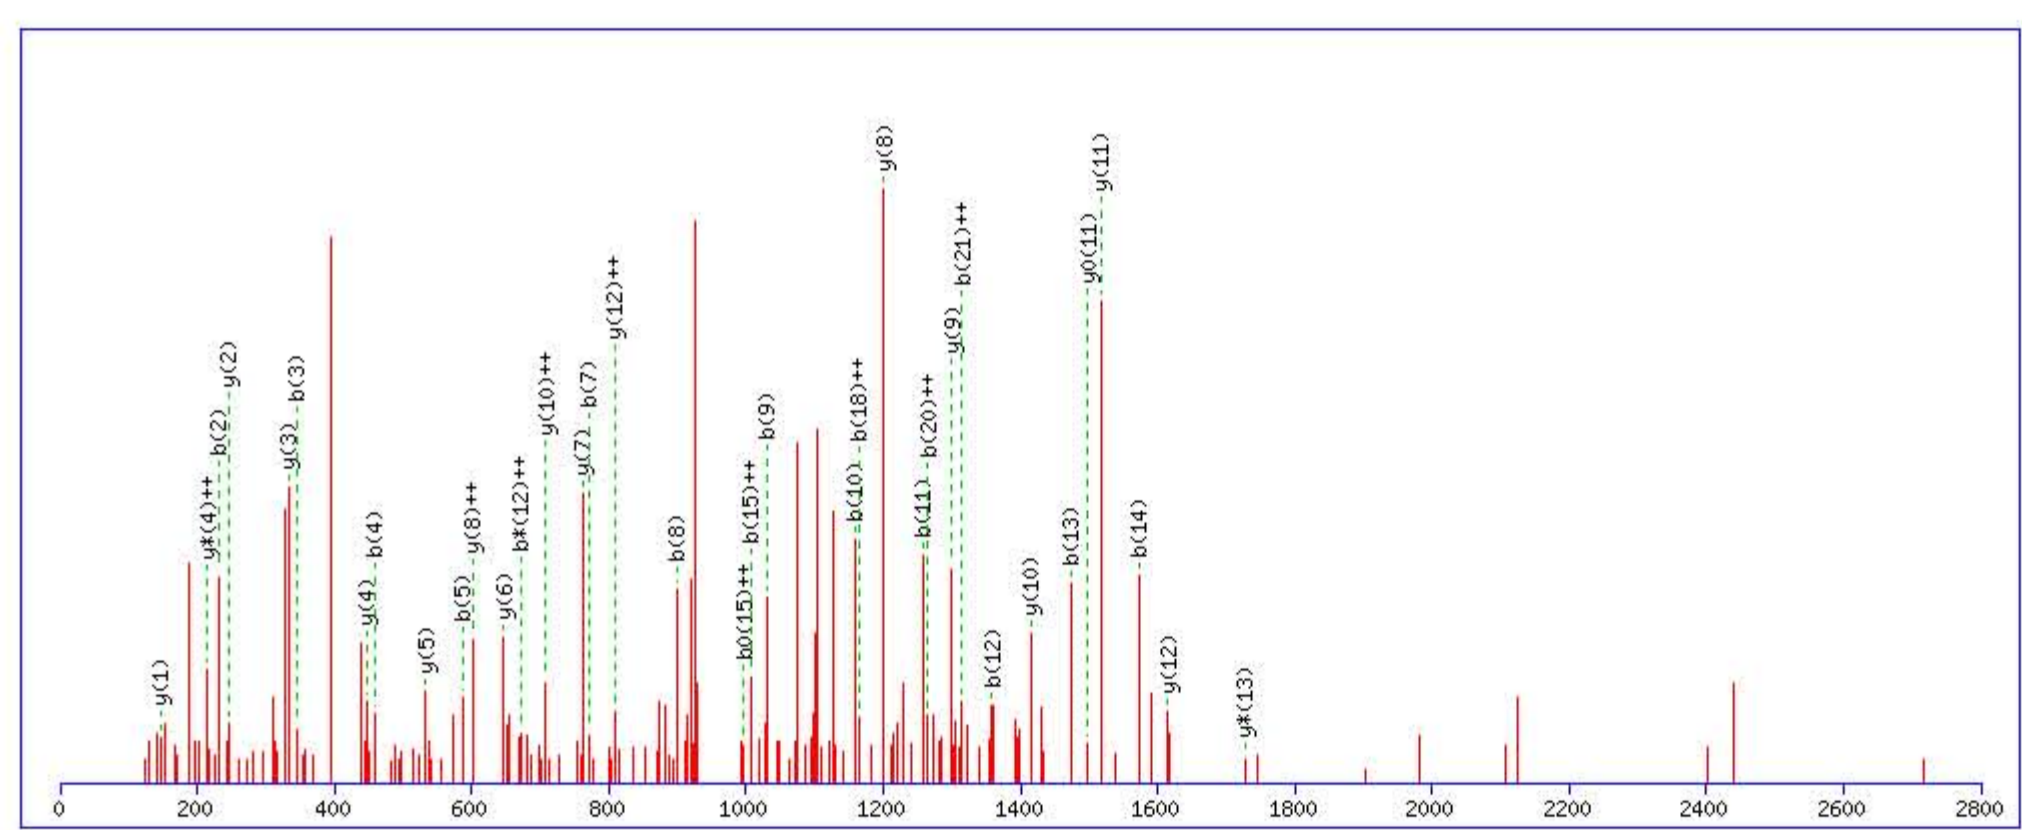

Monoisotopic mass of neutral peptide Mr(calc): 2772.367386  
 Fixed modifications: Carbamidomethyl (C) (apply to specified residues or termini only)  
 Variable modifications:  
 Q15 : Biotin:Thermo-21345 (Q)  
 Ions Score: 69 Expect: 3.7e-006  
 Matches : 36/240 fragment ions using 84 most intense peaks [\(help\)](#)

| #  | b                  | b <sup>++</sup>    | b <sup>*</sup> | b <sup>*++</sup>  | b <sup>0</sup> | b <sup>0++</sup>  | Seq. | y                  | y <sup>++</sup>   | y <sup>*</sup>     | y <sup>*++</sup>  | y <sup>0</sup>     | y <sup>0++</sup> | #  |
|----|--------------------|--------------------|----------------|-------------------|----------------|-------------------|------|--------------------|-------------------|--------------------|-------------------|--------------------|------------------|----|
| 1  | 102.054955         | 51.531116          |                |                   | 84.044390      | 42.525833         | T    |                    |                   |                    |                   |                    |                  | 22 |
| 2  | <b>231.097548</b>  | 116.052412         |                |                   | 213.086983     | 107.047130        | E    | 2672.326980        | 1336.667128       | 2655.300431        | 1328.153854       | 2654.316415        | 1327.661846      | 21 |
| 3  | <b>344.181612</b>  | 172.594444         |                |                   | 326.171047     | 163.589162        | I    | 2543.284387        | 1272.145832       | 2526.257838        | 1263.632557       | 2525.273822        | 1263.140549      | 20 |
| 4  | <b>459.208555</b>  | 230.107916         |                |                   | 441.197990     | 221.102633        | D    | 2430.200323        | 1215.603799       | 2413.173774        | 1207.090525       | 2412.189758        | 1206.598517      | 19 |
| 5  | <b>587.303518</b>  | 294.155397         | 570.276969     | 285.642123        | 569.292953     | 285.150115        | K    | 2315.173380        | 1158.090328       | 2298.146831        | 1149.577053       | 2297.162815        | 1149.085046      | 18 |
| 6  | 684.356282         | 342.681779         | 667.329733     | 334.168505        | 666.345717     | 333.676497        | P    | 2187.078417        | 1094.042847       | 2170.051868        | 1085.529572       | 2169.067852        | 1085.037564      | 17 |
| 7  | <b>771.388310</b>  | 386.197793         | 754.361761     | 377.684519        | 753.377745     | 377.192511        | S    | 2090.025653        | 1045.516465       | 2072.999104        | 1037.003190       | 2072.015088        | 1036.511182      | 16 |
| 8  | <b>899.446888</b>  | 450.227082         | 882.420339     | 441.713808        | 881.436323     | 441.221800        | Q    | 2002.993625        | 1002.000451       | 1985.967076        | 993.487176        | 1984.983060        | 992.995168       | 15 |
| 9  | <b>1030.487373</b> | 515.747325         | 1013.460824    | 507.234050        | 1012.476808    | 506.742042        | M    | 1874.935047        | 937.971162        | 1857.908498        | 929.457887        | 1856.924482        | 928.965879       | 14 |
| 10 | <b>1158.545951</b> | 579.776614         | 1141.519402    | 571.263339        | 1140.535386    | 570.771331        | Q    | 1743.894562        | 872.450919        | <b>1726.868013</b> | 863.937645        | 1725.883997        | 863.445637       | 13 |
| 11 | <b>1257.614365</b> | 629.310821         | 1240.587816    | 620.797546        | 1239.603800    | 620.305538        | V    | <b>1615.835984</b> | <b>808.421630</b> | 1598.809435        | 799.908356        | 1597.825419        | 799.416348       | 12 |
| 12 | <b>1358.662044</b> | 679.834660         | 1341.635495    | <b>671.321386</b> | 1340.651479    | 670.829378        | T    | <b>1516.767570</b> | 758.887423        | 1499.741021        | 750.374149        | <b>1498.757005</b> | 749.882141       | 11 |
| 13 | <b>1473.688987</b> | 737.348132         | 1456.662438    | 728.834857        | 1455.678422    | 728.342849        | D    | <b>1415.719891</b> | <b>708.363584</b> | 1398.693342        | 699.850309        | 1397.709326        | 699.358301       | 10 |
| 14 | <b>1572.757401</b> | 786.882339         | 1555.730852    | 778.369064        | 1554.746836    | 777.877056        | V    | <b>1300.692948</b> | 650.850112        | 1283.666399        | 642.336838        | 1282.682383        | 641.844830       | 9  |
| 15 | 2011.982727        | <b>1006.495002</b> | 1994.956178    | 997.981727        | 1993.972162    | <b>997.489719</b> | Q    | <b>1201.624534</b> | <b>601.315905</b> | 1184.597985        | 592.802631        | 1183.613969        | 592.310623       | 8  |
| 16 | 2127.009670        | 1064.008473        | 2109.983121    | 1055.495199       | 2108.999105    | 1055.003191       | D    | <b>762.399208</b>  | 381.703242        | 745.372659         | 373.189968        | 744.388643         | 372.697960       | 7  |
| 17 | 2241.052597        | 1121.029937        | 2224.026048    | 1112.516662       | 2223.042032    | 1112.024654       | N    | <b>647.372265</b>  | 324.189771        | 630.345716         | 315.676496        | 629.361700         | 315.184488       | 6  |
| 18 | 2328.084625        | <b>1164.545951</b> | 2311.058076    | 1156.032676       | 2310.074060    | 1155.540668       | S    | <b>533.329338</b>  | 267.168307        | 516.302789         | 258.655033        | 515.318773         | 258.163025       | 5  |
| 19 | 2441.168689        | 1221.087983        | 2424.142140    | 1212.574708       | 2423.158124    | 1212.082700       | I    | <b>446.297310</b>  | 223.652293        | 429.270761         | <b>215.139019</b> | 428.286745         | 214.647011       | 4  |
| 20 | 2528.200717        | <b>1264.603997</b> | 2511.174168    | 1256.090722       | 2510.190152    | 1255.598714       | S    | <b>333.213246</b>  | 167.110261        | 316.186697         | 158.596986        | 315.202681         | 158.104978       | 3  |
| 21 | 2627.269131        | <b>1314.138204</b> | 2610.242582    | 1305.624929       | 2609.258566    | 1305.132921       | V    | <b>246.181218</b>  | 123.594247        | 229.154669         | 115.080972        |                    |                  | 2  |
| 22 |                    |                    |                |                   |                |                   | K    | <b>147.112804</b>  | 74.060040         | 130.086255         | 65.546765         |                    |                  | 1  |

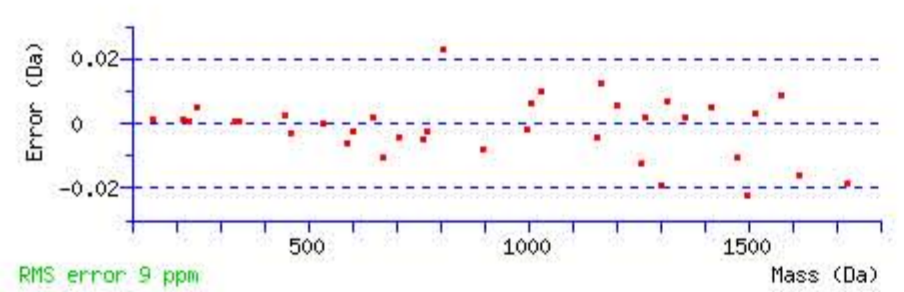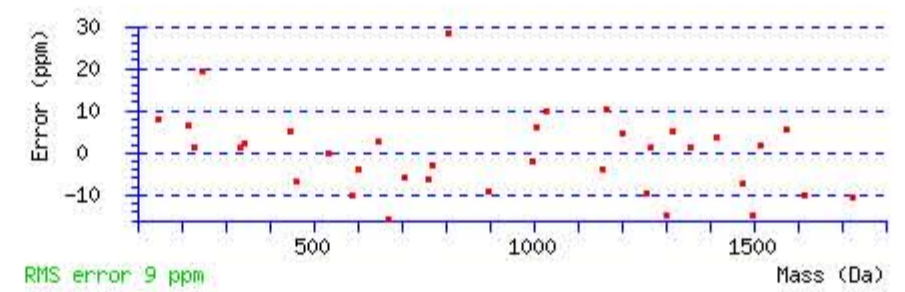

NCBI BLAST search of [TEIDKPSQM<sup>Q</sup>VTDVQDNSISVK](#)  
 (Parameters: blastp, nr protein database, expect=20000, no filter, PAM30)  
 Other BLAST [web gateways](#)

**All matches to this query**

| Score | Mr(calc):   | Delta     | Sequence                                          |
|-------|-------------|-----------|---------------------------------------------------|
| 68.7  | 2772.367386 | -0.004074 | <a href="#">TEIDKPSQM<sup>Q</sup>VTDVQDNSISVK</a> |
| 17.0  | 2772.367386 | -0.004074 | <a href="#">TEIDKPSQM<sup>Q</sup>VTDVQDNSISVK</a> |
| 10.6  | 2772.367386 | -0.004074 | <a href="#">TEIDKPSQM<sup>Q</sup>VTDVQDNSISVK</a> |

# MASCOT Search Results

## Peptide View

MS/MS Fragmentation of **HRPRPYPPNVGEEIQIGHIPR**  
 Found in **FINC\_HUMAN**, Fibronectin OS=Homo sapiens GN=FN1 PE=1 SV=4

Match to Query 51224: 2772.466770 from(555.500630,5+) rtinseconds(1788) index(30523)  
 Title: Locus:1.1.1.3286.10 File:"2013-07-02 CLN FXIII 180 min 3rd F 3.wiff"  
 Data file C:\Program Files (x86)\Matrix Science\Mascot Daemon\mgf9 FXIII 180 min 3rd\mascot\_daemon\_merge.mgf

Click mouse within plot area to zoom in by factor of two about that point  
 Or, Plot from  to  Da   
 Label all possible matches  Label matches used for scoring

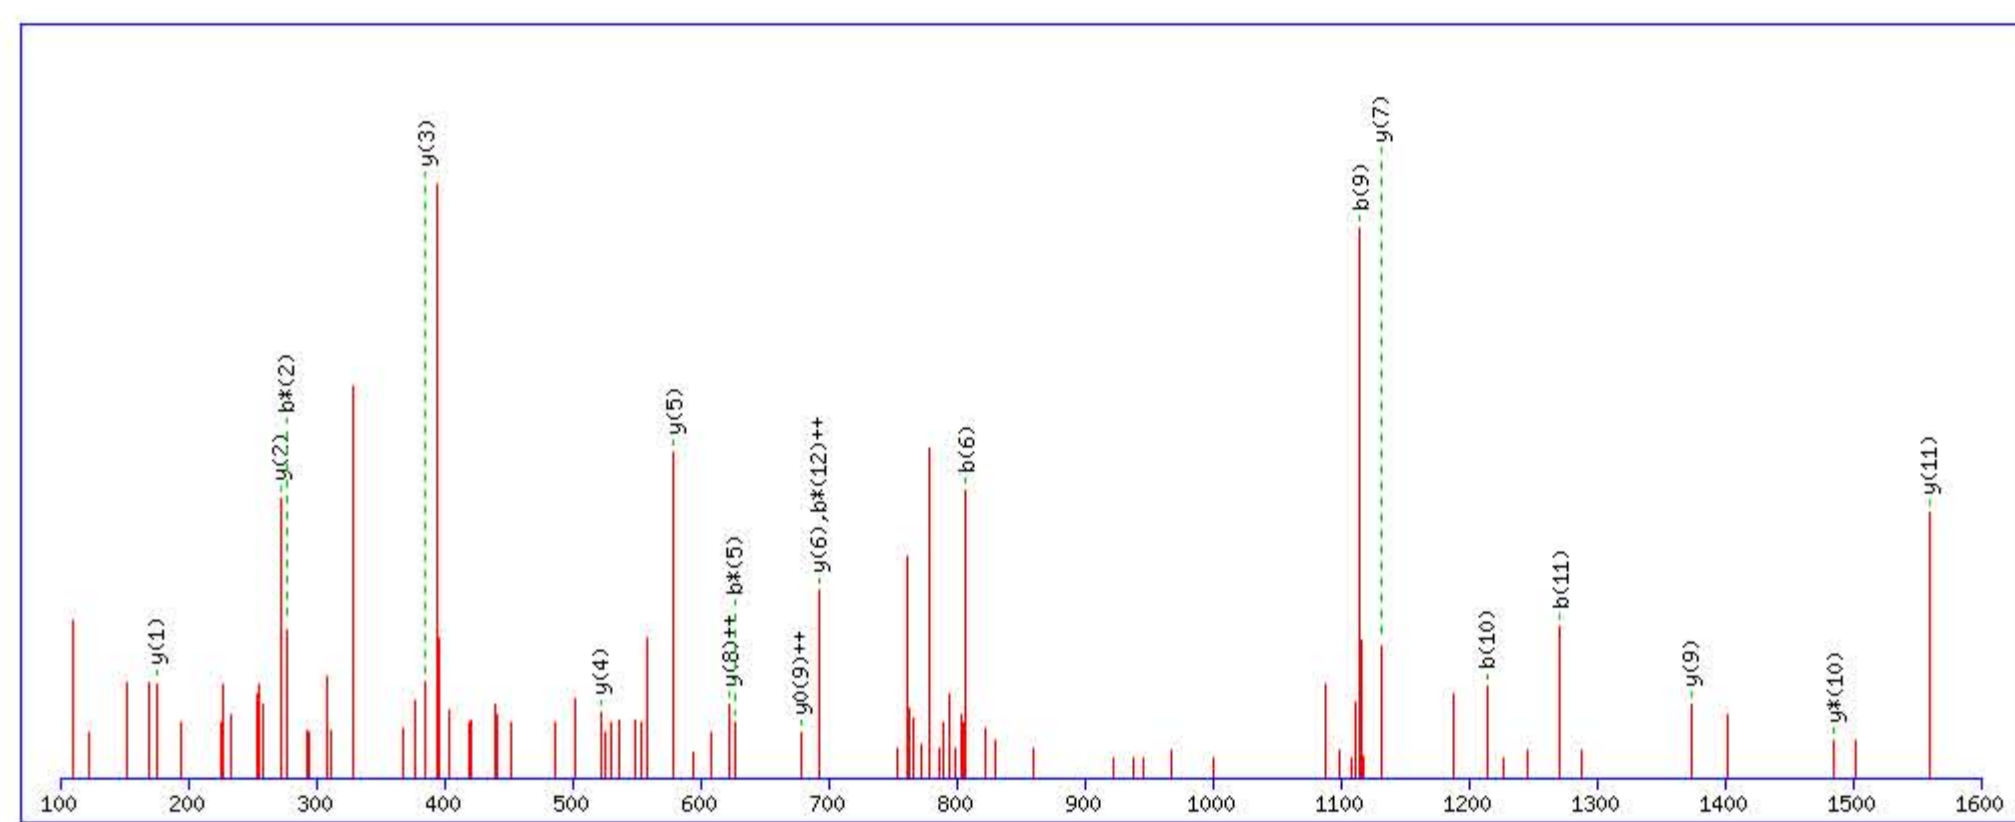

Monoisotopic mass of neutral peptide Mr(calc): 2772.475815  
 Fixed modifications: Carbamidomethyl (C) (apply to specified residues or termini only)  
 Variable modifications:  
 Q15 : Biotin:Thermo-21345 (Q)  
 Ions Score: 25 Expect: 0.0051  
 Matches : 19/200 fragment ions using 51 most intense peaks [\(help\)](#)

| #  | b           | b <sup>++</sup> | b*          | b <sup>+++</sup> | b <sup>0</sup> | b <sup>0++</sup> | Seq. | y           | y <sup>++</sup> | y*          | y <sup>+++</sup> | y <sup>0</sup> | y <sup>0++</sup> | #  |
|----|-------------|-----------------|-------------|------------------|----------------|------------------|------|-------------|-----------------|-------------|------------------|----------------|------------------|----|
| 1  | 138.066188  | 69.536732       |             |                  |                |                  | H    |             |                 |             |                  |                |                  | 21 |
| 2  | 294.167299  | 147.587288      | 277.140750  | 139.074013       |                |                  | R    | 2636.424208 | 1318.715742     | 2619.397659 | 1310.202467      | 2618.413643    | 1309.710459      | 20 |
| 3  | 391.220063  | 196.113670      | 374.193514  | 187.600395       |                |                  | P    | 2480.323097 | 1240.665186     | 2463.296548 | 1232.151912      | 2462.312532    | 1231.659904      | 19 |
| 4  | 547.321174  | 274.164225      | 530.294625  | 265.650951       |                |                  | R    | 2383.270333 | 1192.138804     | 2366.243784 | 1183.625530      | 2365.259768    | 1183.133522      | 18 |
| 5  | 644.373938  | 322.690607      | 627.347389  | 314.177333       |                |                  | P    | 2227.169222 | 1114.088249     | 2210.142673 | 1105.574974      | 2209.158657    | 1105.082966      | 17 |
| 6  | 807.437267  | 404.222272      | 790.410718  | 395.708997       |                |                  | Y    | 2130.116458 | 1065.561867     | 2113.089909 | 1057.048592      | 2112.105893    | 1056.556584      | 16 |
| 7  | 904.490031  | 452.748654      | 887.463482  | 444.235379       |                |                  | P    | 1967.053129 | 984.030203      | 1950.026580 | 975.516928       | 1949.042564    | 975.024920       | 15 |
| 8  | 1001.542795 | 501.275036      | 984.516246  | 492.761761       |                |                  | P    | 1870.000365 | 935.503821      | 1852.973816 | 926.990546       | 1851.989800    | 926.498538       | 14 |
| 9  | 1115.585722 | 558.296499      | 1098.559173 | 549.783225       |                |                  | N    | 1772.947601 | 886.977439      | 1755.921052 | 878.464164       | 1754.937036    | 877.972156       | 13 |
| 10 | 1214.654136 | 607.830706      | 1197.627587 | 599.317432       |                |                  | V    | 1658.904674 | 829.955975      | 1641.878125 | 821.442701       | 1640.894109    | 820.950693       | 12 |
| 11 | 1271.675600 | 636.341438      | 1254.649051 | 627.828164       |                |                  | G    | 1559.836260 | 780.421768      | 1542.809711 | 771.908494       | 1541.825695    | 771.416486       | 11 |
| 12 | 1400.718193 | 700.862735      | 1383.691644 | 692.349460       | 1382.707628    | 691.857452       | E    | 1502.814796 | 751.911036      | 1485.788247 | 743.397762       | 1484.804231    | 742.905754       | 10 |
| 13 | 1529.760786 | 765.384031      | 1512.734237 | 756.870757       | 1511.750221    | 756.378749       | E    | 1373.772203 | 687.389740      | 1356.745654 | 678.876465       | 1355.761638    | 678.384457       | 9  |
| 14 | 1642.844850 | 821.926063      | 1625.818301 | 813.412789       | 1624.834285    | 812.920781       | I    | 1244.729610 | 622.868443      | 1227.703061 | 614.355169       |                |                  | 8  |
| 15 | 2082.070176 | 1041.538726     | 2065.043627 | 1033.025451      | 2064.059611    | 1032.533444      | Q    | 1131.645546 | 566.326411      | 1114.618997 | 557.813137       |                |                  | 7  |
| 16 | 2195.154240 | 1098.080758     | 2178.127691 | 1089.567484      | 2177.143675    | 1089.075476      | I    | 692.420220  | 346.713748      | 675.393671  | 338.200474       |                |                  | 6  |
| 17 | 2252.175704 | 1126.591490     | 2235.149155 | 1118.078215      | 2234.165139    | 1117.586208      | G    | 579.336156  | 290.171716      | 562.309607  | 281.658442       |                |                  | 5  |
| 18 | 2389.234616 | 1195.120946     | 2372.208067 | 1186.607671      | 2371.224051    | 1186.115664      | H    | 522.314692  | 261.660984      | 505.288143  | 253.147710       |                |                  | 4  |
| 19 | 2502.318680 | 1251.662978     | 2485.292131 | 1243.149704      | 2484.308115    | 1242.657696      | I    | 385.255780  | 193.131528      | 368.229231  | 184.618254       |                |                  | 3  |
| 20 | 2599.371444 | 1300.189360     | 2582.344895 | 1291.676086      | 2581.360879    | 1291.184078      | P    | 272.171716  | 136.589496      | 255.145167  | 128.076221       |                |                  | 2  |
| 21 |             |                 |             |                  |                |                  | R    | 175.118952  | 88.063114       | 158.092403  | 79.549839        |                |                  | 1  |

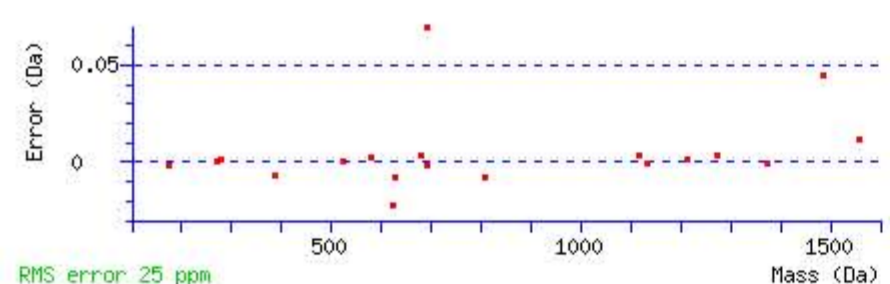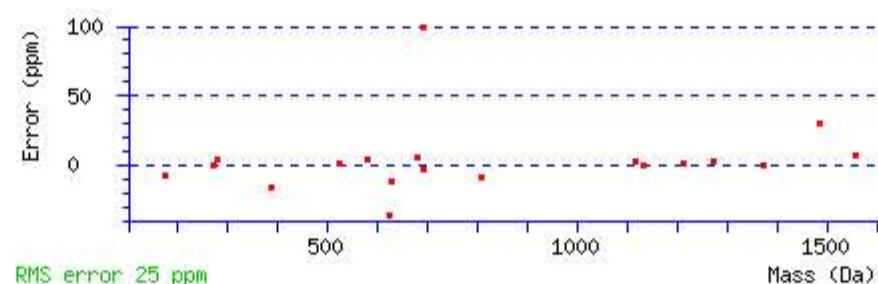

NCBI BLAST search of **HRPRPYPPNVGEEIQIGHIPR**  
 (Parameters: blastp, nr protein database, expect=20000, no filter, PAM30)  
 Other BLAST [web gateways](#)

### All matches to this query

| Score | Mr(calc):   | Delta     | Sequence                                 |
|-------|-------------|-----------|------------------------------------------|
| 25.3  | 2772.475815 | -0.009045 | <a href="#">HRPRPYPPNVGEEIQIGHIPR</a>    |
| 0.8   | 2772.429306 | 0.037464  | <a href="#">EKHLAILKENNISEEVEAPEVEPR</a> |

**Mascot Search Results**

**Peptide View**

MS/MS Fragmentation of **TNTNVNCPICFMPLDVQADR**  
 Found in **FINC\_HUMAN**, Fibronectin OS=Homo sapiens GN=FN1 PE=1 SV=4

Match to Query 51583: 2804.287332 from(935.769720,3+) rtinseconds(2704) index(35859)  
 Title: Locus:1.1.1.3604.22 File:"2013-07-02 CLN FXIII 180 min 3rd F 3.wiff"  
 Data file C:\Program Files (x86)\Matrix Science\Mascot Daemon\mgf\9 FXIII 180 min 3rd\mascot\_daemon\_merge.mgf

Click mouse within plot area to zoom in by factor of two about that point  
 Or, Plot from  to  Da   
 Label all possible matches  Label matches used for scoring

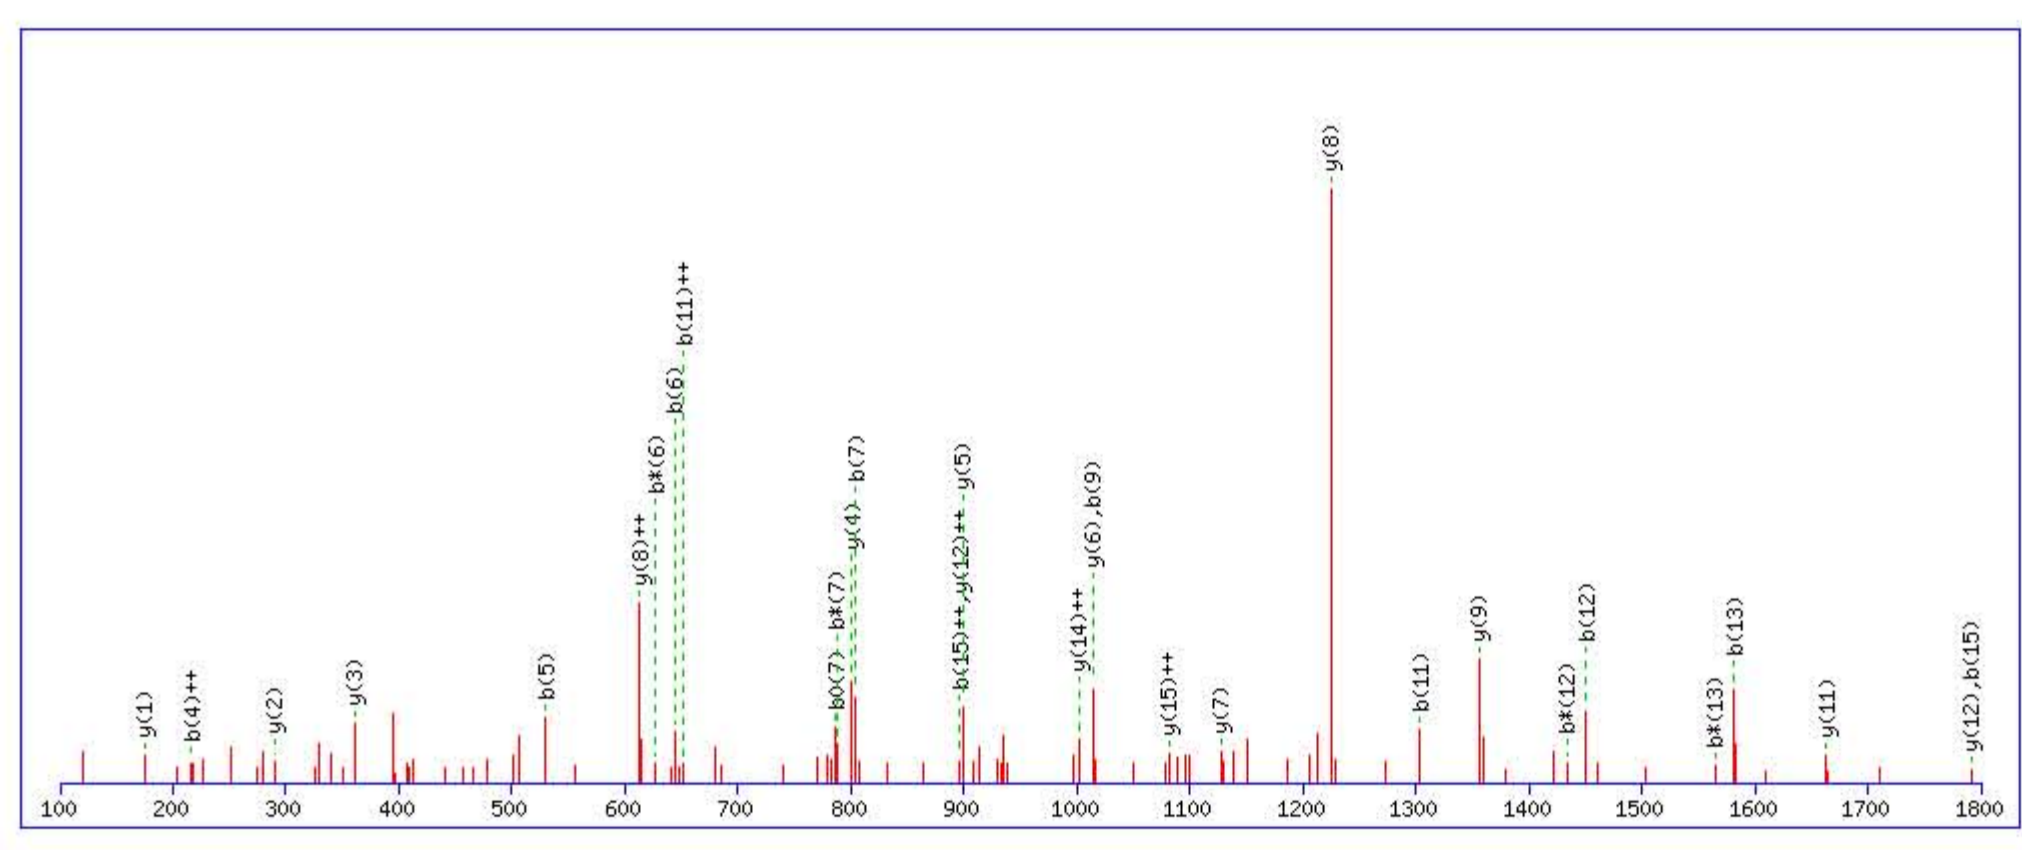

Monoisotopic mass of neutral peptide Mr(calc): 2804.275421  
 Fixed modifications: Carbamidomethyl (C) (apply to specified residues or termini only)  
 Variable modifications:  
 Q18 : Biotin:Thermo-21345 (Q)  
 Ions Score: 56 Expect: 3.2e-005  
 Matches : 32/236 fragment ions using 63 most intense peaks [\(help\)](#)

| #  | b                  | b <sup>++</sup>   | b <sup>*</sup>     | b <sup>+++</sup> | b <sup>0</sup>    | b <sup>0++</sup> | Seq. | y                  | y <sup>++</sup>    | y <sup>*</sup> | y <sup>+++</sup> | y <sup>0</sup> | y <sup>0++</sup> | #  |
|----|--------------------|-------------------|--------------------|------------------|-------------------|------------------|------|--------------------|--------------------|----------------|------------------|----------------|------------------|----|
| 1  | 102.054955         | 51.531116         |                    |                  | 84.044390         | 42.525833        | T    |                    |                    |                |                  |                |                  | 21 |
| 2  | <b>216.097882</b>  | 108.552579        | 199.071333         | 100.039305       | 198.087317        | 99.547296        | N    | 2704.235012        | 1352.621144        | 2687.208463    | 1344.107869      | 2686.224447    | 1343.615861      | 20 |
| 3  | 317.145561         | 159.076418        | 300.119012         | 150.563144       | 299.134996        | 150.071136       | T    | 2590.192085        | 1295.599680        | 2573.165536    | 1287.086406      | 2572.181520    | 1286.594398      | 19 |
| 4  | 431.188488         | <b>216.097882</b> | 414.161939         | 207.584608       | 413.177923        | 207.092600       | N    | 2489.144406        | 1245.075841        | 2472.117857    | 1236.562566      | 2471.133841    | 1236.070558      | 18 |
| 5  | <b>530.256902</b>  | 265.632089        | 513.230353         | 257.118815       | 512.246337        | 256.626807       | V    | 2375.101479        | 1188.054377        | 2358.074930    | 1179.541103      | 2357.090914    | 1179.049095      | 17 |
| 6  | <b>644.299829</b>  | 322.653553        | <b>627.273280</b>  | 314.140278       | 626.289264        | 313.648270       | N    | 2276.033065        | 1138.520170        | 2259.006516    | 1130.006896      | 2258.022500    | 1129.514888      | 16 |
| 7  | <b>804.330478</b>  | 402.668877        | <b>787.303929</b>  | 394.155603       | <b>786.319913</b> | 393.663595       | C    | 2161.990138        | <b>1081.498707</b> | 2144.963589    | 1072.985432      | 2143.979573    | 1072.493424      | 15 |
| 8  | 901.383242         | 451.195259        | 884.356693         | 442.681985       | 883.372677        | 442.189977       | P    | 2001.959489        | <b>1001.483383</b> | 1984.932940    | 992.970108       | 1983.948924    | 992.478100       | 14 |
| 9  | <b>1014.467306</b> | 507.737291        | 997.440757         | 499.224017       | 996.456741        | 498.732009       | I    | 1904.906725        | 952.957001         | 1887.880176    | 944.443726       | 1886.896160    | 943.951718       | 13 |
| 10 | 1143.509899        | 572.258588        | 1126.483350        | 563.745313       | 1125.499334       | 563.253305       | E    | <b>1791.822661</b> | <b>896.414969</b>  | 1774.796112    | 887.901694       | 1773.812096    | 887.409686       | 12 |
| 11 | <b>1303.540548</b> | <b>652.273912</b> | 1286.513999        | 643.760638       | 1285.529983       | 643.268630       | C    | <b>1662.780068</b> | 831.893672         | 1645.753519    | 823.380398       | 1644.769503    | 822.888390       | 11 |
| 12 | <b>1450.608962</b> | 725.808119        | <b>1433.582413</b> | 717.294845       | 1432.598397       | 716.802837       | F    | 1502.749419        | 751.878348         | 1485.722870    | 743.365073       | 1484.738854    | 742.873065       | 10 |
| 13 | <b>1581.649447</b> | 791.328362        | <b>1564.622898</b> | 782.815087       | 1563.638882       | 782.323079       | M    | <b>1355.681005</b> | 678.344141         | 1338.654456    | 669.830866       | 1337.670440    | 669.338858       | 9  |
| 14 | 1678.702211        | 839.854744        | 1661.675662        | 831.341469       | 1660.691646       | 830.849461       | P    | <b>1224.640520</b> | <b>612.823898</b>  | 1207.613971    | 604.310624       | 1206.629955    | 603.818616       | 8  |
| 15 | <b>1791.786275</b> | <b>896.396776</b> | 1774.759726        | 887.883501       | 1773.775710       | 887.391493       | L    | <b>1127.587756</b> | 564.297516         | 1110.561207    | 555.784242       | 1109.577191    | 555.292234       | 7  |
| 16 | 1906.813218        | 953.910247        | 1889.786669        | 945.396973       | 1888.802653       | 944.904965       | D    | <b>1014.503692</b> | 507.755484         | 997.477143     | 499.242210       | 996.493127     | 498.750202       | 6  |
| 17 | 2005.881632        | 1003.444454       | 1988.855083        | 994.931180       | 1987.871067       | 994.439172       | V    | <b>899.476749</b>  | 450.242013         | 882.450200     | 441.728738       | 881.466184     | 441.236730       | 5  |
| 18 | 2445.106958        | 1223.057117       | 2428.080409        | 1214.543843      | 2427.096393       | 1214.051835      | Q    | <b>800.408335</b>  | 400.707806         | 783.381786     | 392.194531       | 782.397770     | 391.702523       | 4  |
| 19 | 2516.144072        | 1258.575674       | 2499.117523        | 1250.062400      | 2498.133507       | 1249.570392      | A    | <b>361.183009</b>  | 181.095142         | 344.156460     | 172.581868       | 343.172444     | 172.089860       | 3  |
| 20 | 2631.171015        | 1316.089146       | 2614.144466        | 1307.575871      | 2613.160450       | 1307.083863      | D    | <b>290.145895</b>  | 145.576585         | 273.119346     | 137.063311       | 272.135330     | 136.571303       | 2  |
| 21 |                    |                   |                    |                  |                   |                  | R    | <b>175.118952</b>  | 88.063114          | 158.092403     | 79.549839        |                |                  | 1  |

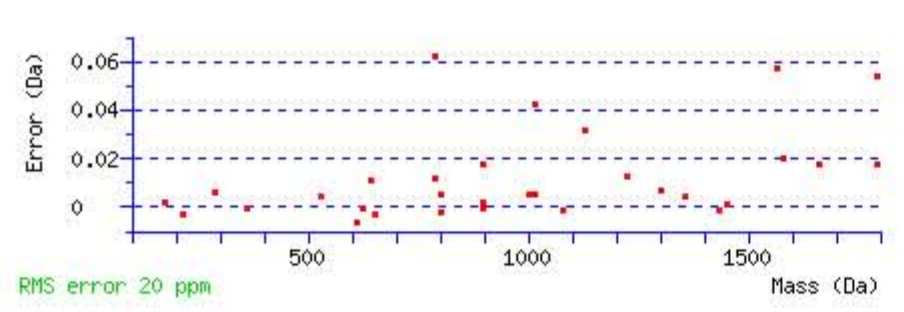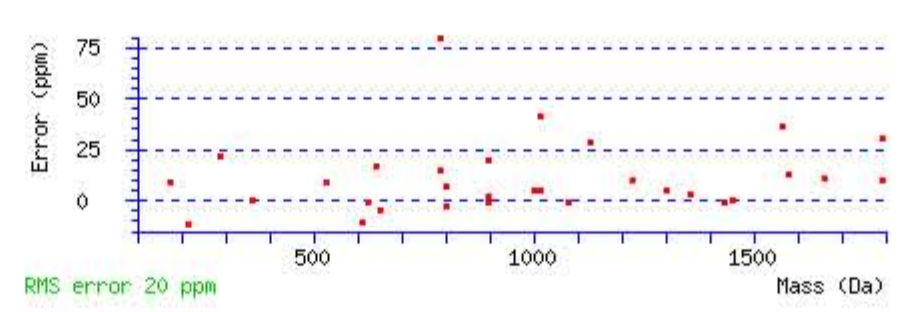

NCBI BLAST search of **TNTNVNCPICFMPLDVQADR**  
 (Parameters: blastp, nr protein database, expect=20000, no filter, PAM30)  
 Other BLAST [web gateways](#)

**All matches to this query**

| Score | Mr(calc):   | Delta     | Sequence                                |
|-------|-------------|-----------|-----------------------------------------|
| 55.7  | 2804.275421 | 0.011911  | <a href="#">TNTNVNCPICFMPLDVQADR</a>    |
| 24.3  | 2804.307587 | -0.020255 | <a href="#">DYAGVFSDAGLIFTSSSGQQAQR</a> |
| 10.0  | 2804.307587 | -0.020255 | <a href="#">DYAGVFSDAGLIFTSSSGQQAQR</a> |
| 5.3   | 2804.307587 | -0.020255 | <a href="#">DYAGVFSDAGLIFTSSSGQQAQR</a> |



# Mascot Search Results

## Peptide View

MS/MS Fragmentation of **RPGGEPSPGTTGQSYNQYSQR**  
 Found in **FINC\_HUMAN**, Fibronectin OS=Homo sapiens GN=FN1 PE=1 SV=4

Match to Query 54131: 3017.406816 from(755.358980,4+) rtinseconds(1814) index(30696)  
 Title: Locus:1.1.1.3295.12 File:"2013-07-02 CLN FXIII 180 min 3rd F 3.wiff"  
 Data file C:\Program Files (x86)\Matrix Science\Mascot Daemon\mgf\9 FXIII 180 min 3rd\mascot\_daemon\_merge.mgf

Click mouse within plot area to zoom in by factor of two about that point  
 Or, Plot from  to  Da   
 Label all possible matches  Label matches used for scoring

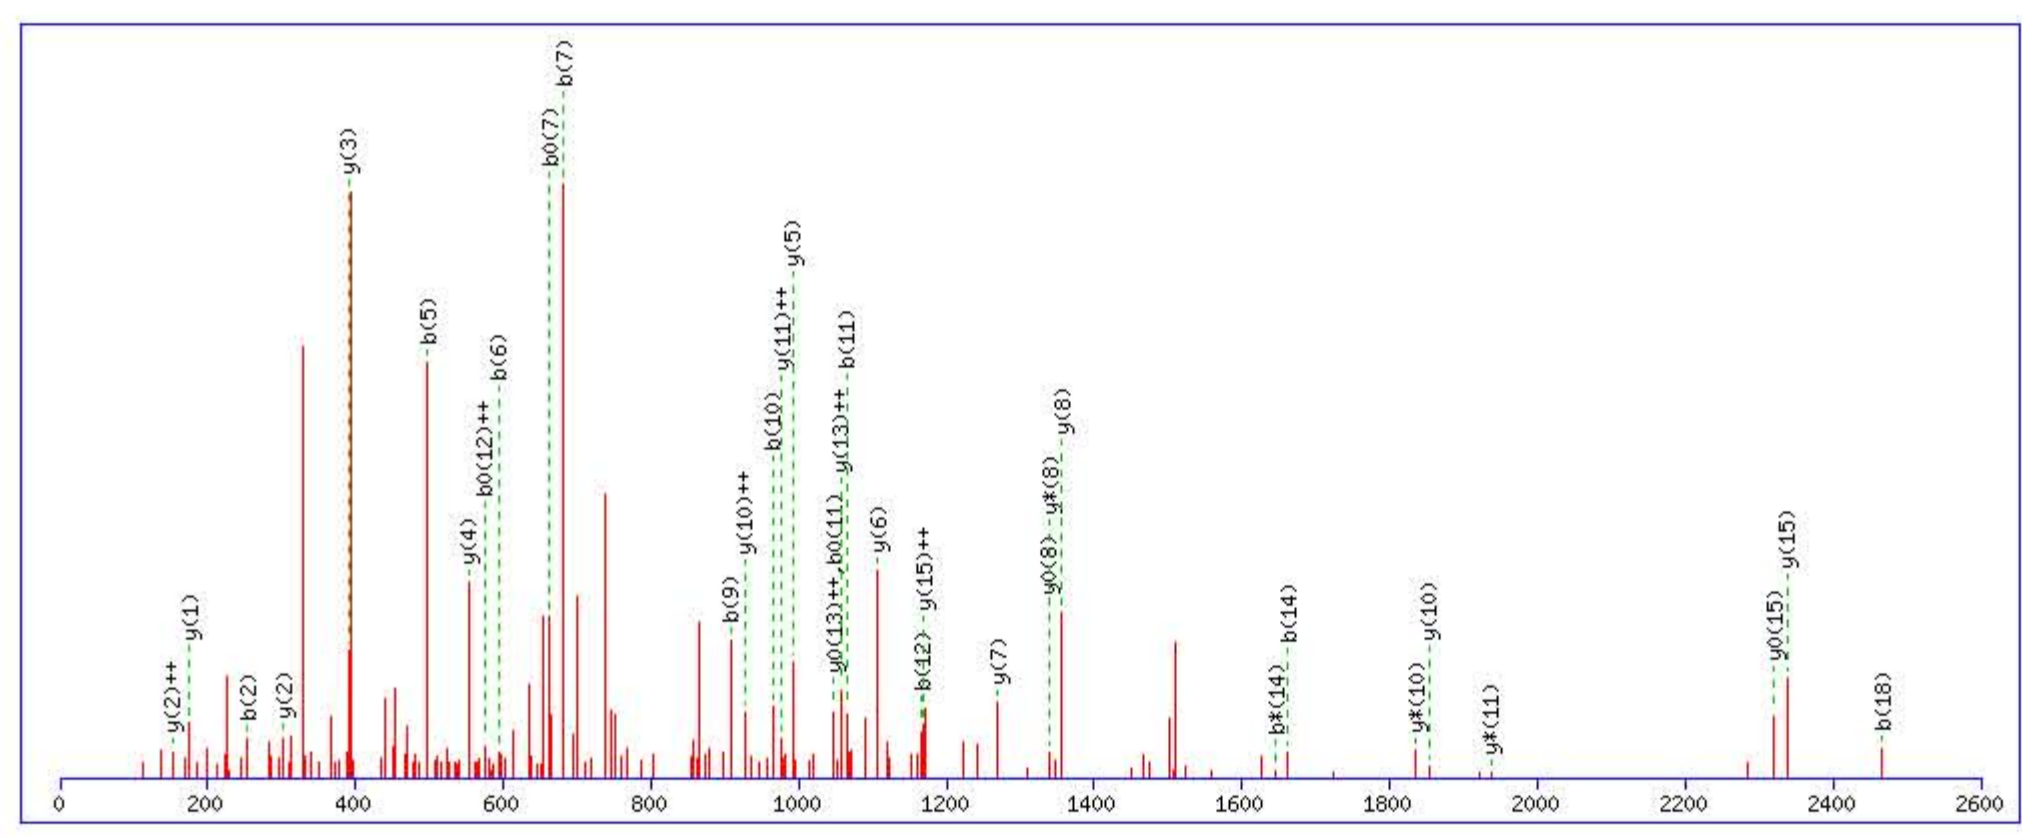

Monoisotopic mass of neutral peptide Mr(calc): 3017.412369  
 Fixed modifications: Carbamidomethyl (C) (apply to specified residues or termini only)  
 Variable modifications:  
 Q14 : Biotin:Thermo-21345 (Q)  
 Q18 : Biotin:Thermo-21345 (Q)  
 Ions Score: 55 Expect: 4.9e-005  
 Matches : 35/240 fragment ions using 71 most intense peaks [\(help\)](#)

| #  | b                  | b <sup>++</sup> | b <sup>+</sup>     | b <sup>+++</sup> | b <sup>0</sup>     | b <sup>0++</sup>  | Seq. | y                  | y <sup>++</sup>    | y <sup>+</sup>     | y <sup>+++</sup> | y <sup>0</sup>     | y <sup>0++</sup>   | #  |
|----|--------------------|-----------------|--------------------|------------------|--------------------|-------------------|------|--------------------|--------------------|--------------------|------------------|--------------------|--------------------|----|
| 1  | 157.108387         | 79.057831       | 140.081838         | 70.544557        |                    |                   | R    |                    |                    |                    |                  |                    |                    | 22 |
| 2  | <b>254.161151</b>  | 127.584213      | 237.134602         | 119.070939       |                    |                   | P    | 2862.318543        | 1431.662909        | 2845.291994        | 1423.149635      | 2844.307978        | 1422.657627        | 21 |
| 3  | 311.182615         | 156.094945      | 294.156066         | 147.581671       |                    |                   | G    | 2765.265779        | 1383.136527        | 2748.239230        | 1374.623253      | 2747.255214        | 1374.131245        | 20 |
| 4  | 368.204079         | 184.605677      | 351.177530         | 176.092403       |                    |                   | G    | 2708.244315        | 1354.625795        | 2691.217766        | 1346.112521      | 2690.233750        | 1345.620513        | 19 |
| 5  | <b>497.246672</b>  | 249.126974      | 480.220123         | 240.613700       | 479.236107         | 240.121692        | E    | 2651.222851        | 1326.115063        | 2634.196302        | 1317.601789      | 2633.212286        | 1317.109781        | 18 |
| 6  | <b>594.299436</b>  | 297.653356      | 577.272887         | 289.140082       | 576.288871         | 288.648074        | P    | 2522.180258        | 1261.593767        | 2505.153709        | 1253.080492      | 2504.169693        | 1252.588484        | 17 |
| 7  | <b>681.331464</b>  | 341.169370      | 664.304915         | 332.656095       | <b>663.320899</b>  | 332.164087        | S    | 2425.127494        | 1213.067385        | 2408.100945        | 1204.554110      | 2407.116929        | 1204.062102        | 16 |
| 8  | 778.384228         | 389.695752      | 761.357679         | 381.182478       | 760.373663         | 380.690470        | P    | <b>2338.095466</b> | <b>1169.551371</b> | 2321.068917        | 1161.038096      | <b>2320.084901</b> | 1160.546088        | 15 |
| 9  | <b>907.426821</b>  | 454.217049      | 890.400272         | 445.703774       | 889.416256         | 445.211766        | E    | 2241.042702        | 1121.024989        | 2224.016153        | 1112.511714      | 2223.032137        | 1112.019706        | 14 |
| 10 | <b>964.448285</b>  | 482.727781      | 947.421736         | 474.214506       | 946.437720         | 473.722498        | G    | 2112.000109        | <b>1056.503692</b> | 2094.973560        | 1047.990418      | 2093.989544        | <b>1047.498410</b> | 13 |
| 11 | <b>1065.495964</b> | 533.251620      | 1048.469415        | 524.738346       | <b>1047.485399</b> | 524.246337        | T    | 2054.978645        | 1027.992960        | 2037.952096        | 1019.479686      | 2036.968080        | 1018.987678        | 12 |
| 12 | <b>1166.543643</b> | 583.775460      | 1149.517094        | 575.262185       | 1148.533078        | <b>574.770177</b> | T    | 1953.930966        | <b>977.469121</b>  | <b>1936.904417</b> | 968.955847       | 1935.920401        | 968.463839         | 11 |
| 13 | 1223.565107        | 612.286191      | 1206.538558        | 603.772917       | 1205.554542        | 603.280909        | G    | <b>1852.883287</b> | <b>926.945282</b>  | <b>1835.856738</b> | 918.432007       | 1834.872722        | 917.939999         | 10 |
| 14 | <b>1662.790433</b> | 831.898854      | <b>1645.763884</b> | 823.385580       | 1644.779868        | 822.893572        | Q    | 1795.861823        | 898.434550         | 1778.835274        | 889.921275       | 1777.851258        | 889.429267         | 9  |
| 15 | 1749.822461        | 875.414869      | 1732.795912        | 866.901594       | 1731.811896        | 866.409586        | S    | <b>1356.636497</b> | 678.821887         | <b>1339.609948</b> | 670.308612       | <b>1338.625932</b> | 669.816604         | 8  |
| 16 | 1912.885790        | 956.946533      | 1895.859241        | 948.433259       | 1894.875225        | 947.941251        | Y    | <b>1269.604469</b> | 635.305873         | 1252.577920        | 626.792598       | 1251.593904        | 626.300590         | 7  |
| 17 | 2026.928717        | 1013.967997     | 2009.902168        | 1005.454722      | 2008.918152        | 1004.962714       | N    | <b>1106.541140</b> | 553.774208         | 1089.514591        | 545.260934       | 1088.530575        | 544.768926         | 6  |
| 18 | <b>2466.154043</b> | 1233.580659     | 2449.127494        | 1225.067385      | 2448.143478        | 1224.575377       | Q    | <b>992.498213</b>  | 496.752745         | 975.471664         | 488.239470       | 974.487648         | 487.747462         | 5  |
| 19 | 2629.217372        | 1315.112324     | 2612.190823        | 1306.599049      | 2611.206807        | 1306.107041       | Y    | <b>553.272887</b>  | 277.140082         | 536.246338         | 268.626807       | 535.262322         | 268.134799         | 4  |
| 20 | 2716.249400        | 1358.628338     | 2699.222851        | 1350.115063      | 2698.238835        | 1349.623056       | S    | <b>390.209558</b>  | 195.608417         | 373.183009         | 187.095143       | 372.198993         | 186.603135         | 3  |
| 21 | 2844.307978        | 1422.657627     | 2827.281429        | 1414.144353      | 2826.297413        | 1413.652345       | Q    | <b>303.177530</b>  | <b>152.092403</b>  | 286.150981         | 143.579129       |                    |                    | 2  |
| 22 |                    |                 |                    |                  |                    |                   | R    | <b>175.118952</b>  | 88.063114          | 158.092403         | 79.549839        |                    |                    | 1  |

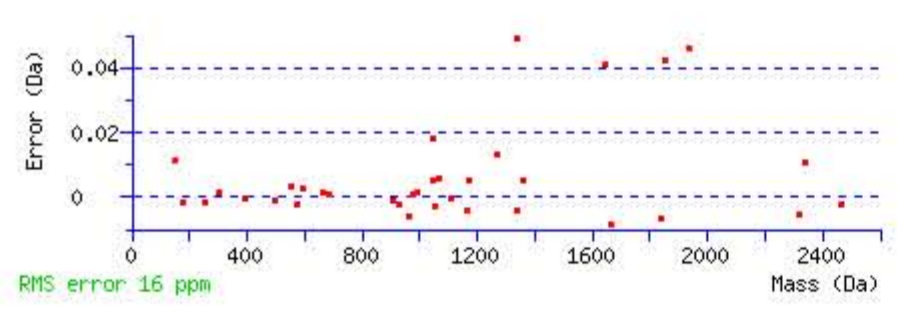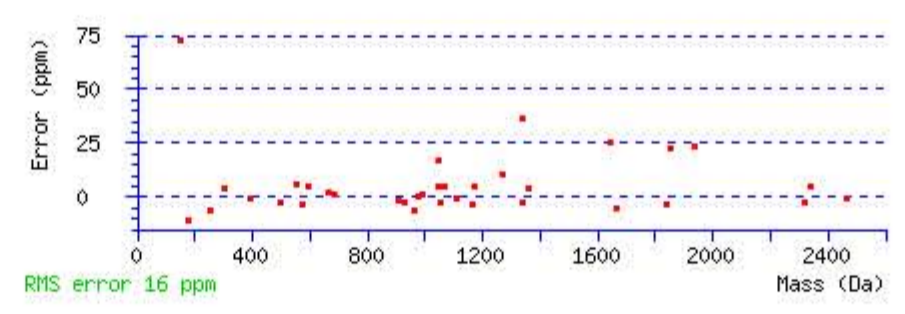

NCBI BLAST search of **RPGGEPSPGTTGQSYNQYSQR**  
 (Parameters: blastp, nr protein database, expect=20000, no filter, PAM30)  
 Other BLAST [web gateways](#)

### All matches to this query

| Score | Mr(calc):   | Delta     | Sequence                              |
|-------|-------------|-----------|---------------------------------------|
| 55.3  | 3017.412369 | -0.005553 | <a href="#">RPGGEPSPGTTGQSYNQYSQR</a> |
| 47.7  | 3017.412369 | -0.005553 | <a href="#">RPGGEPSPGTTGQSYNQYSQR</a> |
| 18.6  | 3017.412369 | -0.005553 | <a href="#">RPGGEPSPGTTGQSYNQYSQR</a> |

# Mascot Search Results

## Peptide View

MS/MS Fragmentation of **TEIDKPSQMQVTDVQDNSISVK**  
 Found in **FINC\_HUMAN**, Fibronectin OS=Homo sapiens GN=FN1 PE=1 SV=4

Match to Query 54629: 3083.527736 from(771.889210,4+) rtinseconds(2173) index(32873)  
 Title: Locus:1.1.1.3420.14 File:"2013-07-02 CLN FXIII 180 min 3rd F 3.wiff"  
 Data file C:\Program Files (x86)\Matrix Science\Mascot Daemon\mgf\9 FXIII 180 min 3rd\mascot\_daemon\_merge.mgf

Click mouse within plot area to zoom in by factor of two about that point  
 Or, Plot from  to  Da   
 Label all possible matches  Label matches used for scoring

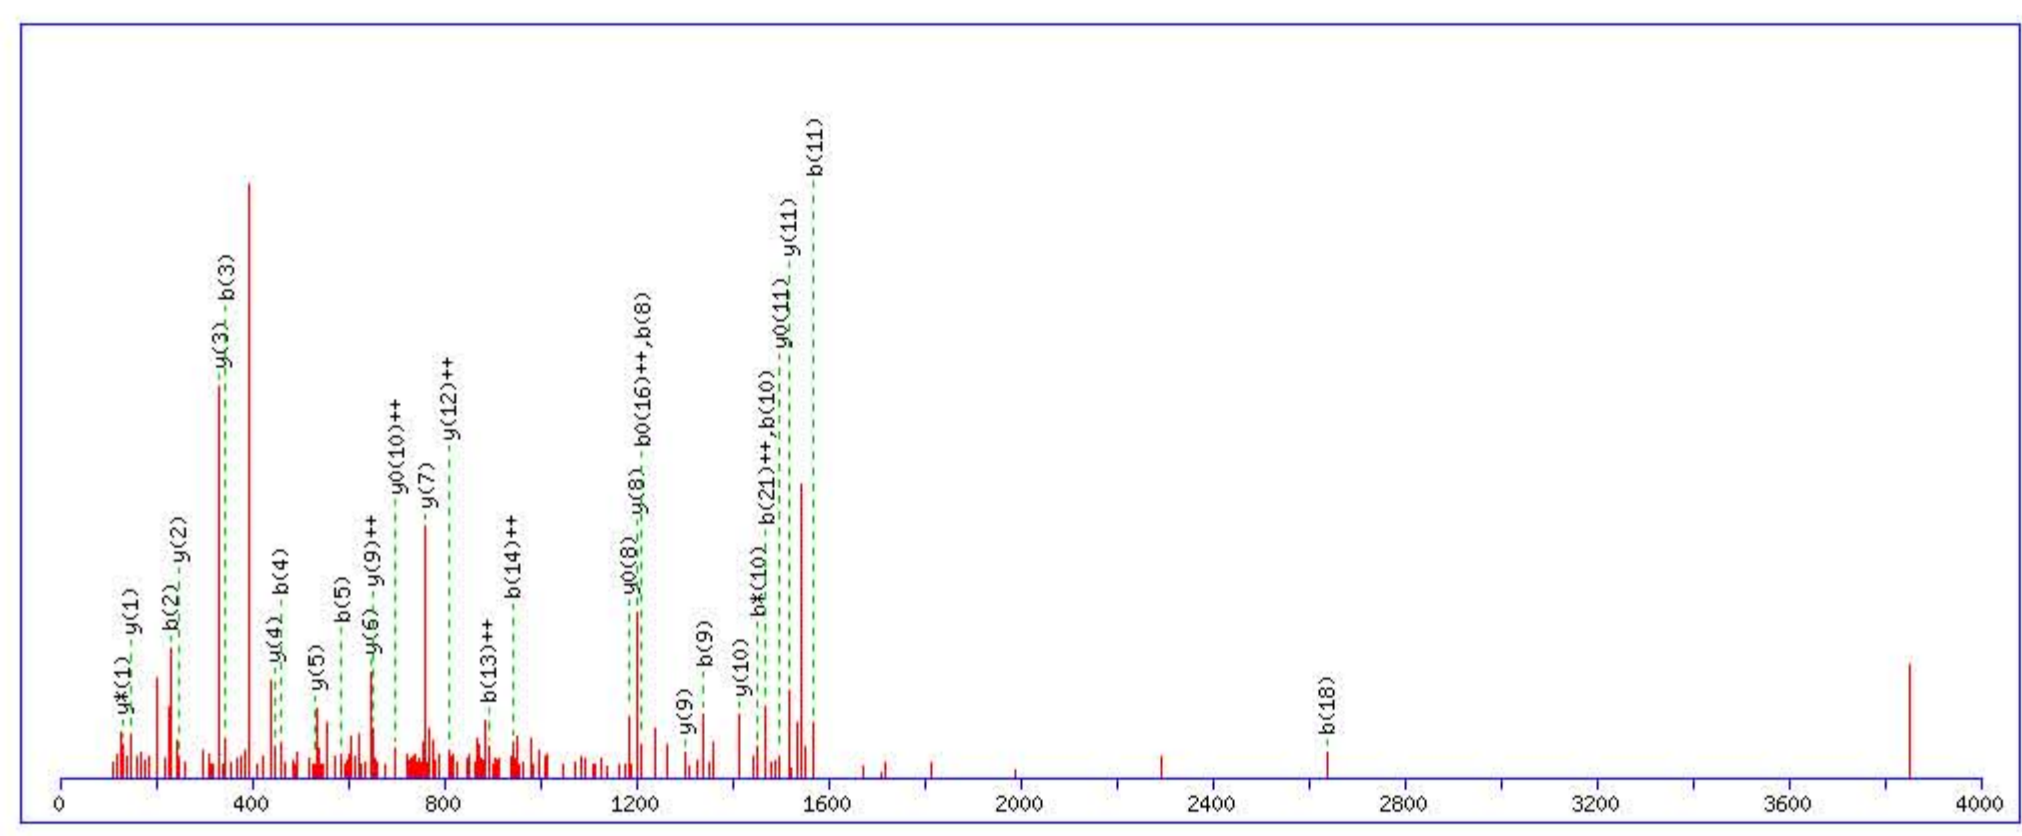

Monoisotopic mass of neutral peptide Mr(calc): 3083.534134  
 Fixed modifications: Carbamidomethyl (C) (apply to specified residues or termini only)  
 Variable modifications:  
 Q8 : Biotin:Thermo-21345 (Q)  
 Q15 : Biotin:Thermo-21345 (Q)  
 Ions Score: 40 Expect: 0.0027  
 Matches : 31/240 fragment ions using 95 most intense peaks [\(help\)](#)

| #  | b                  | b <sup>++</sup>    | b <sup>+</sup>     | b <sup>+++</sup> | b <sup>0</sup> | b <sup>0++</sup>   | Seq. | y                  | y <sup>++</sup>   | y <sup>+</sup>    | y <sup>+++</sup> | y <sup>0</sup>     | y <sup>0++</sup>  | #  |
|----|--------------------|--------------------|--------------------|------------------|----------------|--------------------|------|--------------------|-------------------|-------------------|------------------|--------------------|-------------------|----|
| 1  | 102.054955         | 51.531116          |                    |                  | 84.044390      | 42.525833          | T    |                    |                   |                   |                  |                    |                   | 22 |
| 2  | <b>231.097548</b>  | 116.052412         |                    |                  | 213.086983     | 107.047130         | E    | 2983.493728        | 1492.250502       | 2966.467179       | 1483.737228      | 2965.483163        | 1483.245220       | 21 |
| 3  | <b>344.181612</b>  | 172.594444         |                    |                  | 326.171047     | 163.589162         | I    | 2854.451135        | 1427.729206       | 2837.424586       | 1419.215931      | 2836.440570        | 1418.723923       | 20 |
| 4  | <b>459.208555</b>  | 230.107916         |                    |                  | 441.197990     | 221.102633         | D    | 2741.367071        | 1371.187174       | 2724.340522       | 1362.673899      | 2723.356506        | 1362.181891       | 19 |
| 5  | <b>587.303518</b>  | 294.155397         | 570.276969         | 285.642123       | 569.292953     | 285.150115         | K    | 2626.340128        | 1313.673702       | 2609.313579       | 1305.160428      | 2608.329563        | 1304.668420       | 18 |
| 6  | 684.356282         | 342.681779         | 667.329733         | 334.168505       | 666.345717     | 333.676497         | P    | 2498.245165        | 1249.626220       | 2481.218616       | 1241.112946      | 2480.234600        | 1240.620938       | 17 |
| 7  | 771.388310         | 386.197793         | 754.361761         | 377.684519       | 753.377745     | 377.192511         | S    | 2401.192401        | 1201.099838       | 2384.165852       | 1192.586564      | 2383.181836        | 1192.094556       | 16 |
| 8  | <b>1210.613636</b> | 605.810456         | 1193.587087        | 597.297182       | 1192.603071    | 596.805174         | Q    | 2314.160373        | 1157.583825       | 2297.133824       | 1149.070550      | 2296.149808        | 1148.578542       | 15 |
| 9  | <b>1341.654121</b> | 671.330699         | 1324.627572        | 662.817424       | 1323.643556    | 662.325416         | M    | 1874.935047        | 937.971162        | 1857.908498       | 929.457887       | 1856.924482        | 928.965879        | 14 |
| 10 | <b>1469.712699</b> | 735.359988         | <b>1452.686150</b> | 726.846713       | 1451.702134    | 726.354705         | Q    | 1743.894562        | 872.450919        | 1726.868013       | 863.937645       | 1725.883997        | 863.445637        | 13 |
| 11 | <b>1568.781113</b> | 784.894195         | 1551.754564        | 776.380920       | 1550.770548    | 775.888912         | V    | 1615.835984        | <b>808.421630</b> | 1598.809435       | 799.908356       | 1597.825419        | 799.416348        | 12 |
| 12 | 1669.828792        | 835.418034         | 1652.802243        | 826.904760       | 1651.818227    | 826.412752         | T    | <b>1516.767570</b> | 758.887423        | 1499.741021       | 750.374149       | <b>1498.757005</b> | 749.882141        | 11 |
| 13 | 1784.855735        | <b>892.931506</b>  | 1767.829186        | 884.418231       | 1766.845170    | 883.926223         | D    | <b>1415.719891</b> | 708.363584        | 1398.693342       | 699.850309       | 1397.709326        | <b>699.358301</b> | 10 |
| 14 | 1883.924149        | <b>942.465713</b>  | 1866.897600        | 933.952438       | 1865.913584    | 933.460430         | V    | <b>1300.692948</b> | <b>650.850112</b> | 1283.666399       | 642.336838       | 1282.682383        | 641.844830        | 9  |
| 15 | 2323.149475        | 1162.078376        | 2306.122926        | 1153.565101      | 2305.138910    | 1153.073093        | Q    | <b>1201.624534</b> | 601.315905        | 1184.597985       | 592.802631       | <b>1183.613969</b> | 592.310623        | 8  |
| 16 | 2438.176418        | 1219.591847        | 2421.149869        | 1211.078573      | 2420.165853    | <b>1210.586565</b> | D    | <b>762.399208</b>  | 381.703242        | 745.372659        | 373.189968       | 744.388643         | 372.697960        | 7  |
| 17 | 2552.219345        | 1276.613311        | 2535.192796        | 1268.100036      | 2534.208780    | 1267.608028        | N    | <b>647.372265</b>  | 324.189771        | 630.345716        | 315.676496       | 629.361700         | 315.184488        | 6  |
| 18 | <b>2639.251373</b> | 1320.129325        | 2622.224824        | 1311.616050      | 2621.240808    | 1311.124042        | S    | <b>533.329338</b>  | 267.168307        | 516.302789        | 258.655033       | 515.318773         | 258.163025        | 5  |
| 19 | 2752.335437        | 1376.671357        | 2735.308888        | 1368.158082      | 2734.324872    | 1367.666074        | I    | <b>446.297310</b>  | 223.652293        | 429.270761        | 215.139019       | 428.286745         | 214.647011        | 4  |
| 20 | 2839.367465        | 1420.187371        | 2822.340916        | 1411.674096      | 2821.356900    | 1411.182088        | S    | <b>333.213246</b>  | 167.110261        | 316.186697        | 158.596986       | 315.202681         | 158.104978        | 3  |
| 21 | 2938.435879        | <b>1469.721578</b> | 2921.409330        | 1461.208303      | 2920.425314    | 1460.716295        | V    | <b>246.181218</b>  | 123.594247        | 229.154669        | 115.080972       |                    |                   | 2  |
| 22 |                    |                    |                    |                  |                |                    | K    | <b>147.112804</b>  | 74.060040         | <b>130.086255</b> | 65.546765        |                    |                   | 1  |

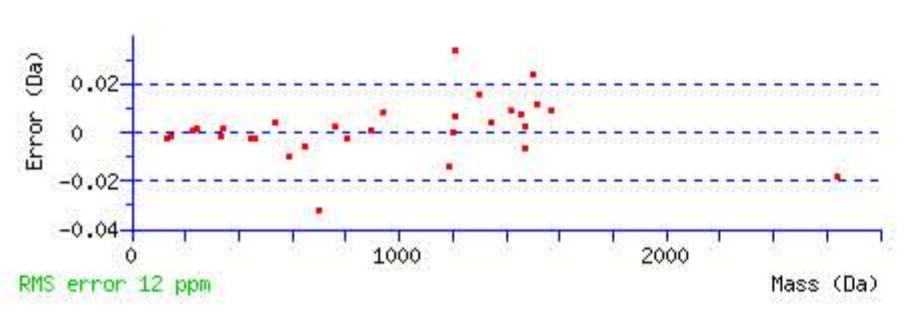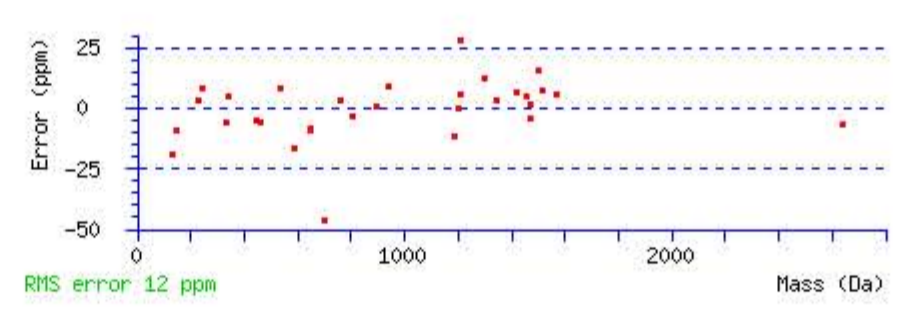

NCBI BLAST search of [TEIDKPSQMQVTDVQDNSISVK](#)  
 (Parameters: blastp, nr protein database, expect=20000, no filter, PAM30)  
 Other BLAST [web gateways](#)

### All matches to this query

| Score | Mr(calc):   | Delta     | Sequence                               |
|-------|-------------|-----------|----------------------------------------|
| 40.4  | 3083.534134 | -0.006398 | <a href="#">TEIDKPSQMQVTDVQDNSISVK</a> |
| 30.8  | 3083.534134 | -0.006398 | <a href="#">TEIDKPSQMQVTDVQDNSISVK</a> |
| 10.4  | 3083.534134 | -0.006398 | <a href="#">TEIDKPSQMQVTDVQDNSISVK</a> |

# MASCOT Search Results

## Peptide View

MS/MS Fragmentation of **GLKPGVVYEGQLISIQYGHQEVTR**  
 Found in **FINC\_HUMAN**, Fibronectin OS=Homo sapiens GN=FN1 PE=1 SV=4

Match to Query 54768: 3109.637496 from(778.416650,4+) rtinseconds(2210) index(33085)  
 Title: Locus:1.1.1.3433.11 File:"2013-07-02 CLN FXIII 180 min 3rd F 3.wiff"  
 Data file C:\Program Files (x86)\Matrix Science\Mascot Daemon\mgf9 FXIII 180 min 3rd\mascot\_daemon\_merge.mgf

Click mouse within plot area to zoom in by factor of two about that point  
 Or, Plot from  to  Da   
 Label all possible matches  Label matches used for scoring

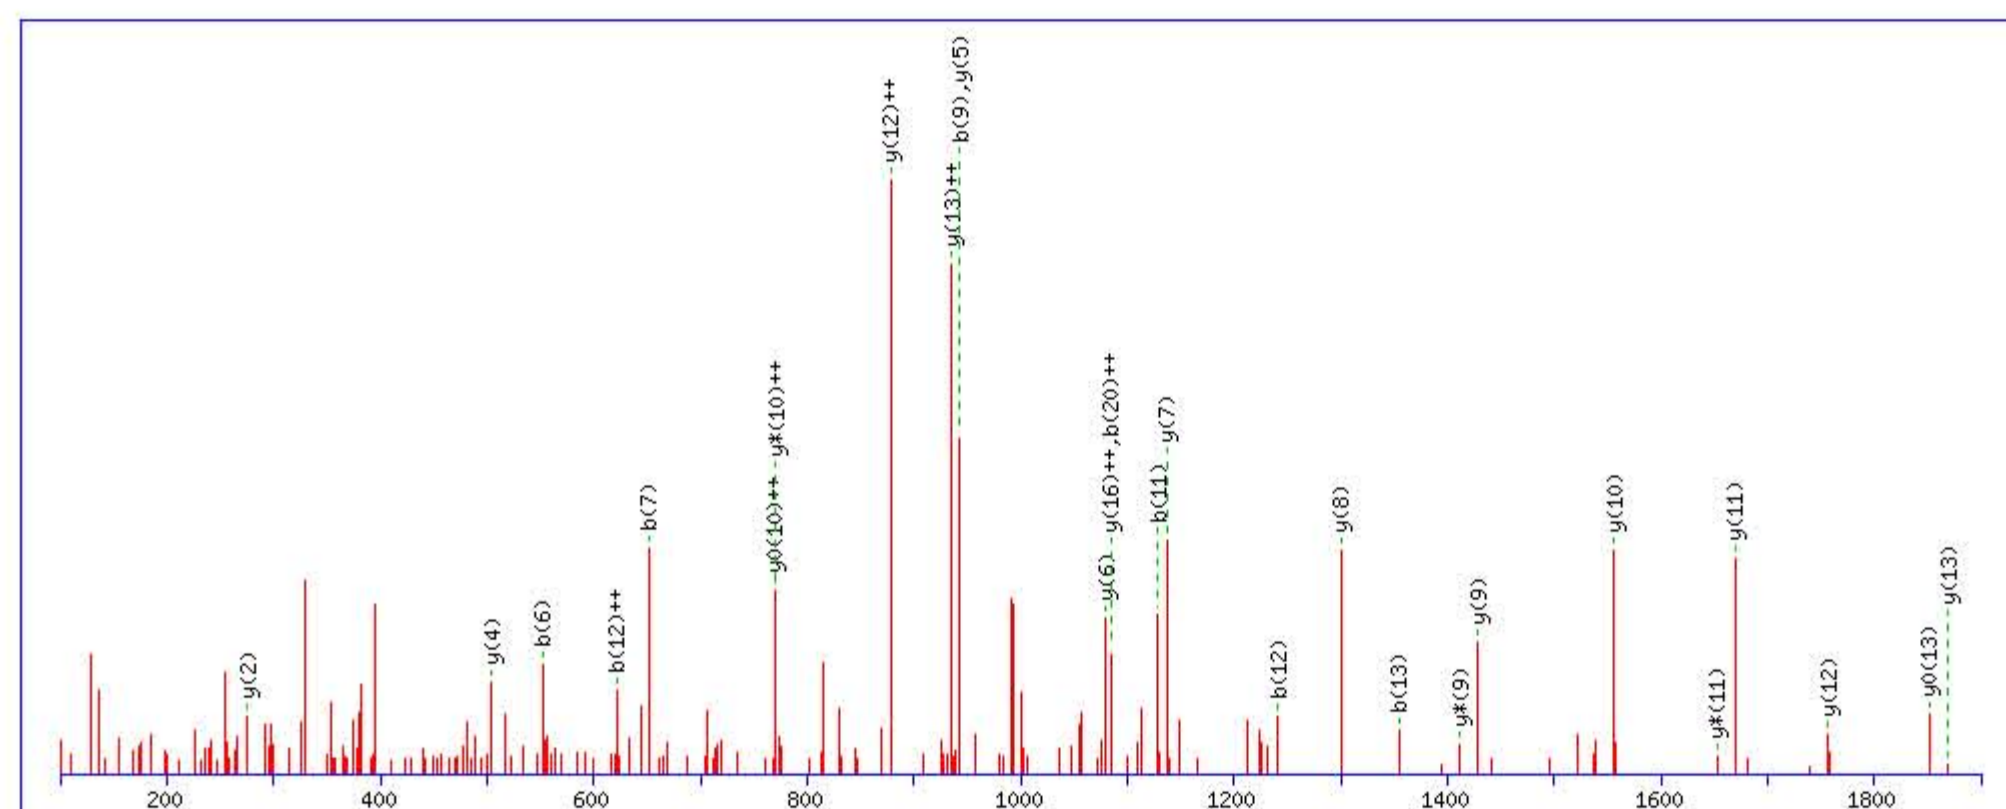

Monoisotopic mass of neutral peptide Mr(calc): 3109.638275  
 Fixed modifications: Carbamidomethyl (C) (apply to specified residues or termini only)  
 Variable modifications:  
 Q21 : Biotin:Thermo-21345 (Q)  
 Ions Score: 68 Expect: 3.4e-006  
 Matches : 27/266 fragment ions using 36 most intense peaks [\(help\)](#)

| #  | b                  | b <sup>++</sup>    | b <sup>*</sup> | b <sup>*++</sup> | b <sup>0</sup> | b <sup>0++</sup> | Seq. | y                  | y <sup>++</sup>    | y <sup>*</sup>     | y <sup>*++</sup>  | y <sup>0</sup>     | y <sup>0++</sup>  | #  |
|----|--------------------|--------------------|----------------|------------------|----------------|------------------|------|--------------------|--------------------|--------------------|-------------------|--------------------|-------------------|----|
| 1  | 58.028740          | 29.518008          |                |                  |                |                  | G    |                    |                    |                    |                   |                    |                   | 25 |
| 2  | 171.112804         | 86.060040          |                |                  |                |                  | L    | 3053.624092        | 1527.315684        | 3036.597543        | 1518.802409       | 3035.613527        | 1518.310401       | 24 |
| 3  | 299.207767         | 150.107521         | 282.181218     | 141.594247       |                |                  | K    | 2940.540028        | 1470.773652        | 2923.513479        | 1462.260377       | 2922.529463        | 1461.768369       | 23 |
| 4  | 396.260531         | 198.633903         | 379.233982     | 190.120629       |                |                  | P    | 2812.445065        | 1406.726170        | 2795.418516        | 1398.212896       | 2794.434500        | 1397.720888       | 22 |
| 5  | 453.281995         | 227.144635         | 436.255446     | 218.631361       |                |                  | G    | 2715.392301        | 1358.199788        | 2698.365752        | 1349.686514       | 2697.381736        | 1349.194506       | 21 |
| 6  | <b>552.350409</b>  | 276.678843         | 535.323860     | 268.165568       |                |                  | V    | 2658.370837        | 1329.689056        | 2641.344288        | 1321.175782       | 2640.360272        | 1320.683774       | 20 |
| 7  | <b>651.418823</b>  | 326.213050         | 634.392274     | 317.699775       |                |                  | V    | 2559.302423        | 1280.154849        | 2542.275874        | 1271.641575       | 2541.291858        | 1271.149567       | 19 |
| 8  | 814.482152         | 407.744714         | 797.455603     | 399.231440       |                |                  | Y    | 2460.234009        | 1230.620642        | 2443.207460        | 1222.107368       | 2442.223444        | 1221.615360       | 18 |
| 9  | <b>943.524745</b>  | 472.266011         | 926.498196     | 463.752736       | 925.514180     | 463.260728       | E    | 2297.170680        | 1149.088978        | 2280.144131        | 1140.575703       | 2279.160115        | 1140.083695       | 17 |
| 10 | 1000.546209        | 500.776743         | 983.519660     | 492.263468       | 982.535644     | 491.771460       | G    | 2168.128087        | <b>1084.567681</b> | 2151.101538        | 1076.054407       | 2150.117522        | 1075.562399       | 16 |
| 11 | <b>1128.604787</b> | 564.806032         | 1111.578238    | 556.292757       | 1110.594222    | 555.800749       | Q    | 2111.106623        | 1056.056949        | 2094.080074        | 1047.543675       | 2093.096058        | 1047.051667       | 15 |
| 12 | <b>1241.688851</b> | <b>621.348063</b>  | 1224.662302    | 612.834789       | 1223.678286    | 612.342781       | L    | 1983.048045        | 992.027660         | 1966.021496        | 983.514386        | 1965.037480        | 983.022378        | 14 |
| 13 | <b>1354.772915</b> | 677.890095         | 1337.746366    | 669.376821       | 1336.762350    | 668.884813       | I    | <b>1869.963981</b> | <b>935.485628</b>  | 1852.937432        | 926.972354        | <b>1851.953416</b> | 926.480346        | 13 |
| 14 | 1441.804943        | 721.406109         | 1424.778394    | 712.892835       | 1423.794378    | 712.400827       | S    | <b>1756.879917</b> | <b>878.943597</b>  | 1739.853368        | 870.430322        | 1738.869352        | 869.938314        | 12 |
| 15 | 1554.889007        | 777.948141         | 1537.862458    | 769.434867       | 1536.878442    | 768.942859       | I    | <b>1669.847889</b> | 835.427582         | <b>1652.821340</b> | 826.914308        | 1651.837324        | 826.422300        | 11 |
| 16 | 1682.947585        | 841.977430         | 1665.921036    | 833.464156       | 1664.937020    | 832.972148       | Q    | <b>1556.763825</b> | 778.885551         | 1539.737276        | <b>770.372276</b> | 1538.753260        | <b>769.880268</b> | 10 |
| 17 | 1811.006163        | 906.006719         | 1793.979614    | 897.493445       | 1792.995598    | 897.001437       | Q    | <b>1428.705247</b> | 714.856262         | <b>1411.678698</b> | 706.342987        | 1410.694682        | 705.850979        | 9  |
| 18 | 1974.069492        | 987.538384         | 1957.042943    | 979.025109       | 1956.058927    | 978.533101       | Y    | <b>1300.646669</b> | 650.826973         | 1283.620120        | 642.313698        | 1282.636104        | 641.821690        | 8  |
| 19 | 2031.090956        | 1016.049116        | 2014.064407    | 1007.535841      | 2013.080391    | 1007.043833      | G    | <b>1137.583340</b> | 569.295308         | 1120.556791        | 560.782034        | 1119.572775        | 560.290025        | 7  |
| 20 | 2168.149868        | <b>1084.578572</b> | 2151.123319    | 1076.065297      | 2150.139303    | 1075.573289      | H    | <b>1080.561876</b> | 540.784576         | 1063.535327        | 532.271302        | 1062.551311        | 531.779293        | 6  |
| 21 | 2607.375194        | 1304.191235        | 2590.348645    | 1295.677960      | 2589.364629    | 1295.185952      | Q    | <b>943.502964</b>  | 472.255120         | 926.476415         | 463.741846        | 925.492399         | 463.249838        | 5  |
| 22 | 2736.417787        | 1368.712531        | 2719.391238    | 1360.199257      | 2718.407222    | 1359.707249      | E    | <b>504.277638</b>  | 252.642457         | 487.251089         | 244.129182        | 486.267073         | 243.637174        | 4  |
| 23 | 2835.486201        | 1418.246738        | 2818.459652    | 1409.733464      | 2817.475636    | 1409.241456      | V    | 375.235045         | 188.121160         | 358.208496         | 179.607886        | 357.224480         | 179.115878        | 3  |
| 24 | 2936.533880        | 1468.770578        | 2919.507331    | 1460.257303      | 2918.523315    | 1459.765295      | T    | <b>276.166631</b>  | 138.586953         | 259.140082         | 130.073679        | 258.156066         | 129.581671        | 2  |
| 25 |                    |                    |                |                  |                |                  | R    | 175.118952         | 88.063114          | 158.092403         | 79.549839         |                    |                   | 1  |

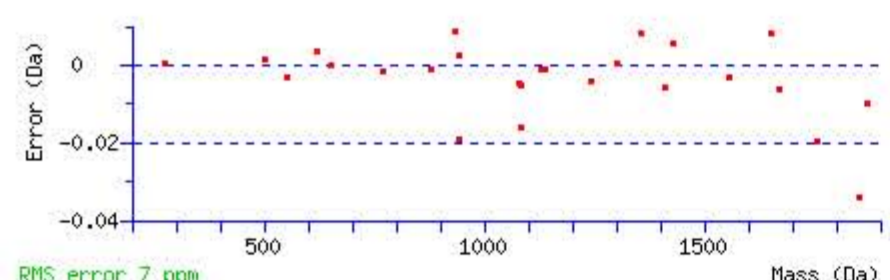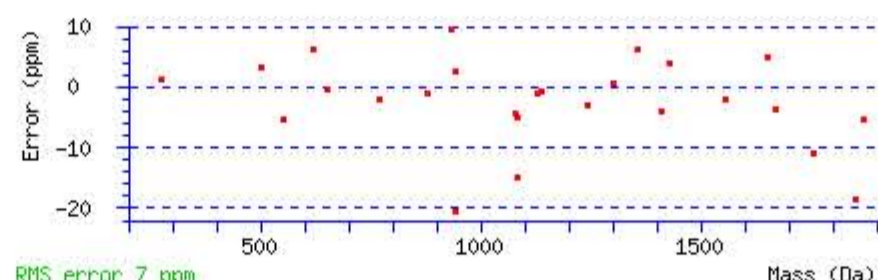

NCBI BLAST search of **GLKPGVVYEGQLISIQYGHQEVTR**  
 (Parameters: blastp, nr protein database, expect=20000, no filter, PAM30)  
 Other BLAST [web gateways](#)

## All matches to this query

| Score | Mr(calc):   | Delta     | Sequence                                 |
|-------|-------------|-----------|------------------------------------------|
| 68.0  | 3109.638275 | -0.000779 | <a href="#">GLKPGVVYEGQLISIQYGHQEVTR</a> |
| 37.4  | 3109.638275 | -0.000779 | <a href="#">GLKPGVVYEGQLISIQYGHQEVTR</a> |
| 29.2  | 3109.638275 | -0.000779 | <a href="#">GLKPGVVYEGQLISIQYGHQEVTR</a> |

MATRIX SCIENCE Mascot Search Results

Peptide View

MS/MS Fragmentation of **TDELPQLVTLPHPNLHGPEILDVPSTVQK**  
 Found in **FINC\_HUMAN**, Fibronectin OS=Homo sapiens GN=FN1 PE=1 SV=4

Match to Query 59572: 3497.861696 from(875.472700,4+) rtinseconds(2605) index(35237)  
 Title: Locus:1.1.1.3570.24 File:"2013-07-02 CLN FXIII 180 min 3rd F 3.wiff"  
 Data file C:\Program Files (x86)\Matrix Science\Mascot Daemon\mgf9 FXIII 180 min 3rd\mascot\_daemon\_merge.mgf

Click mouse within plot area to zoom in by factor of two about that point  
 Or, Plot from 100 to 1700 Da Full range  
 Label all possible matches  Label matches used for scoring

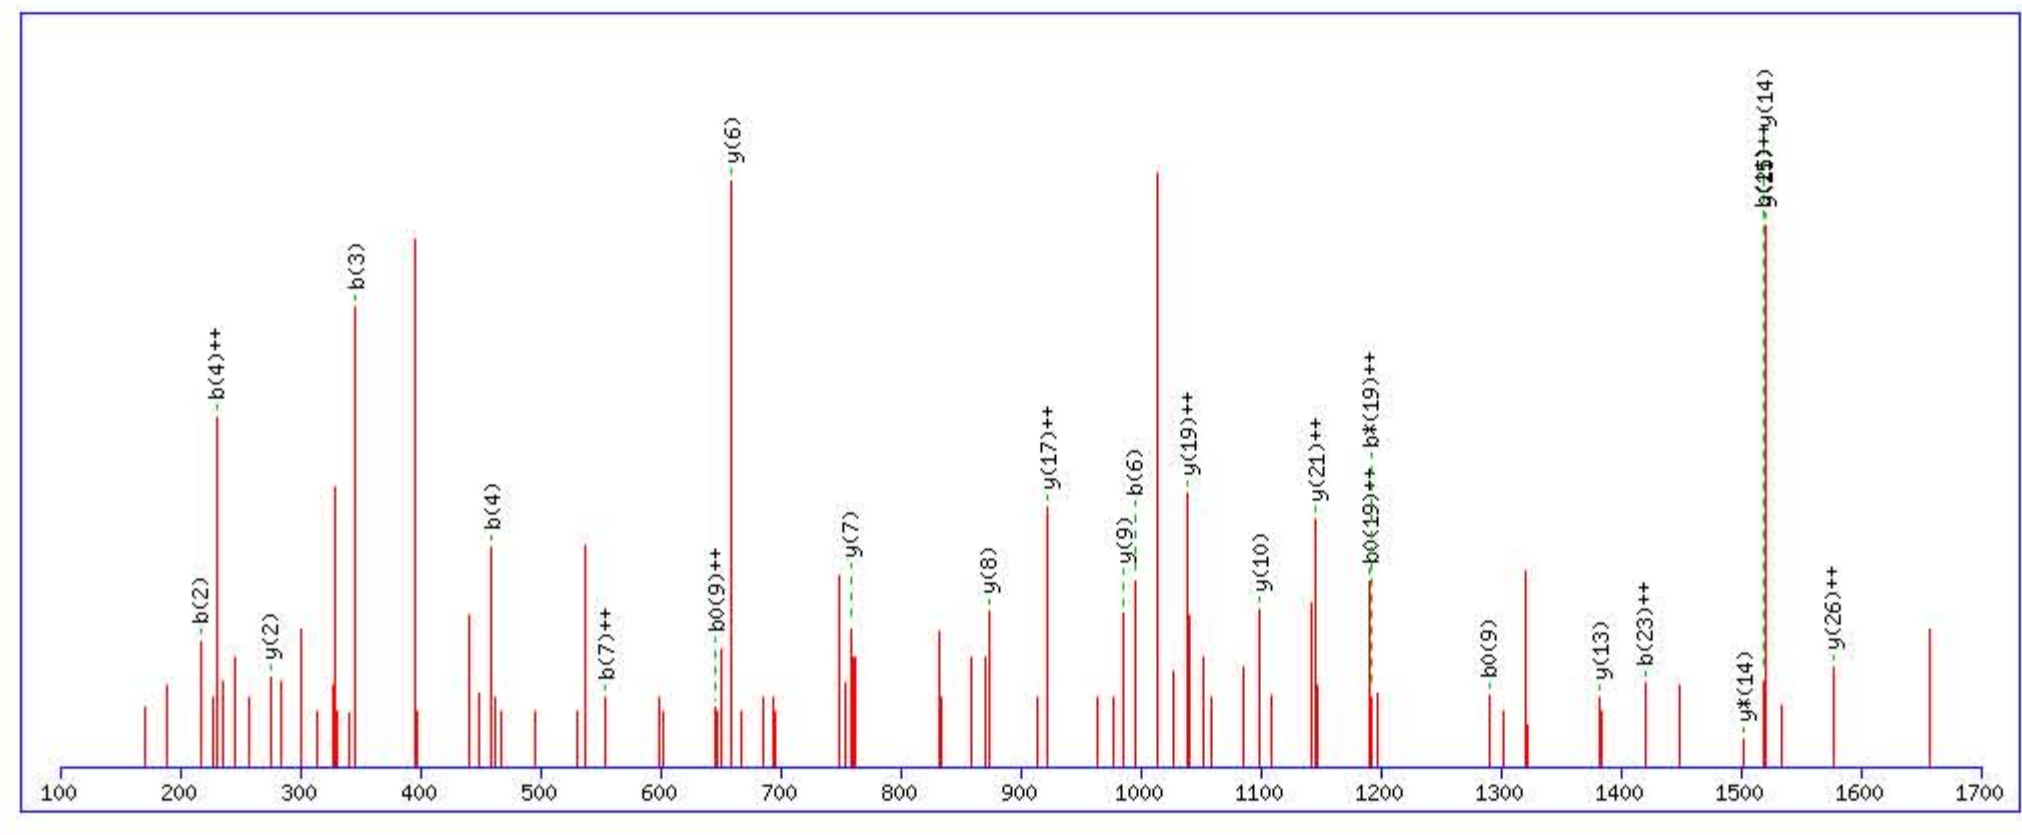

Monoisotopic mass of neutral peptide Mr(calc): 3497.859238  
 Fixed modifications: Carbamidomethyl (C) (apply to specified residues or termini only)  
 Variable modifications: Q6 : Biotin:Thermo-21345 (Q)  
 Ions Score: 26 Expect: 0.042  
 Matches : 26/320 fragment ions using 65 most intense peaks (help)

| #  | b                  | b <sup>++</sup>    | b <sup>+</sup> | b <sup>+++</sup>   | b <sup>0</sup>     | b <sup>0++</sup>   | Seq. | y                  | y <sup>++</sup>    | y <sup>+</sup>     | y <sup>+++</sup> | y <sup>0</sup> | y <sup>0++</sup> | #  |
|----|--------------------|--------------------|----------------|--------------------|--------------------|--------------------|------|--------------------|--------------------|--------------------|------------------|----------------|------------------|----|
| 1  | 102.054955         | 51.531116          |                |                    | 84.044390          | 42.525833          | T    |                    |                    |                    |                  |                |                  | 29 |
| 2  | <b>217.081898</b>  | 109.044587         |                |                    | 199.071333         | 100.039304         | D    | 3397.818827        | 1699.413051        | 3380.792278        | 1690.899777      | 3379.808262    | 1690.407769      | 28 |
| 3  | <b>346.124491</b>  | 173.565883         |                |                    | 328.113926         | 164.560601         | E    | 3282.791884        | 1641.899580        | 3265.765335        | 1633.386305      | 3264.781319    | 1632.894297      | 27 |
| 4  | <b>459.208555</b>  | <b>230.107915</b>  |                |                    | 441.197990         | 221.102633         | L    | 3153.749291        | <b>1577.378283</b> | 3136.722742        | 1568.865009      | 3135.738726    | 1568.373001      | 26 |
| 5  | 556.261319         | 278.634298         |                |                    | 538.250754         | 269.629015         | P    | 3040.665227        | <b>1520.836251</b> | 3023.638678        | 1512.322977      | 3022.654662    | 1511.830969      | 25 |
| 6  | <b>995.486645</b>  | 498.246961         | 978.460096     | 489.733686         | 977.476080         | 489.241678         | Q    | 2943.612463        | 1472.309869        | 2926.585914        | 1463.796595      | 2925.601898    | 1463.304587      | 24 |
| 7  | 1108.570709        | <b>554.788993</b>  | 1091.544160    | 546.275718         | 1090.560144        | 545.783710         | L    | 2504.387137        | 1252.697206        | 2487.360588        | 1244.183932      | 2486.376572    | 1243.691924      | 23 |
| 8  | 1207.639123        | 604.323200         | 1190.612574    | 595.809925         | 1189.628558        | 595.317917         | V    | 2391.303073        | 1196.155174        | 2374.276524        | 1187.641900      | 2373.292508    | 1187.149892      | 22 |
| 9  | 1308.686802        | 654.847039         | 1291.660253    | 646.333765         | <b>1290.676237</b> | <b>645.841757</b>  | T    | 2292.234659        | <b>1146.620967</b> | 2275.208110        | 1138.107693      | 2274.224094    | 1137.615685      | 21 |
| 10 | 1421.770866        | 711.389071         | 1404.744317    | 702.875797         | 1403.760301        | 702.383789         | L    | 2191.186980        | 1096.097128        | 2174.160431        | 1087.583853      | 2173.176415    | 1087.091845      | 20 |
| 11 | <b>1518.823630</b> | 759.915453         | 1501.797081    | 751.402179         | 1500.813065        | 750.910171         | P    | 2078.102916        | <b>1039.555096</b> | 2061.076367        | 1031.041821      | 2060.092351    | 1030.549813      | 19 |
| 12 | 1655.882542        | 828.444909         | 1638.855993    | 819.931635         | 1637.871977        | 819.439627         | H    | 1981.050152        | 991.028714         | 1964.023603        | 982.515440       | 1963.039587    | 982.023432       | 18 |
| 13 | 1752.935306        | 876.971291         | 1735.908757    | 868.458017         | 1734.924741        | 867.966009         | P    | 1843.991240        | <b>922.499258</b>  | 1826.964691        | 913.985984       | 1825.980675    | 913.493976       | 17 |
| 14 | 1866.978233        | 933.992755         | 1849.951684    | 925.479480         | 1848.967668        | 924.987472         | N    | 1746.938476        | 873.972876         | 1729.911927        | 865.459602       | 1728.927911    | 864.967594       | 16 |
| 15 | 1980.062297        | 990.534787         | 1963.035748    | 982.021512         | 1962.051732        | 981.529504         | L    | 1632.895549        | 816.951413         | 1615.869000        | 808.438138       | 1614.884984    | 807.946130       | 15 |
| 16 | 2117.121209        | 1059.064242        | 2100.094660    | 1050.550968        | 2099.110644        | 1050.058960        | H    | <b>1519.811485</b> | 760.409381         | <b>1502.784936</b> | 751.896106       | 1501.800920    | 751.404098       | 14 |
| 17 | 2174.142673        | 1087.574974        | 2157.116124    | 1079.061700        | 2156.132108        | 1078.569692        | G    | <b>1382.752573</b> | 691.879925         | 1365.726024        | 683.366650       | 1364.742008    | 682.874642       | 13 |
| 18 | 2271.195437        | 1136.101356        | 2254.168888    | 1127.588082        | 2253.184872        | 1127.096074        | P    | 1325.731109        | 663.369193         | 1308.704560        | 654.855918       | 1307.720544    | 654.363910       | 12 |
| 19 | 2400.238030        | 1200.622653        | 2383.211481    | <b>1192.109378</b> | 2382.227465        | <b>1191.617370</b> | E    | 1228.678345        | 614.842811         | 1211.651796        | 606.329536       | 1210.667780    | 605.837528       | 11 |
| 20 | 2513.322094        | 1257.164685        | 2496.295545    | 1248.651410        | 2495.311529        | 1248.159402        | I    | <b>1099.635752</b> | 550.321514         | 1082.609203        | 541.808240       | 1081.625187    | 541.316231       | 10 |
| 21 | 2626.406158        | 1313.706717        | 2609.379609    | 1305.193442        | 2608.395593        | 1304.701435        | L    | <b>986.551688</b>  | 493.779482         | 969.525139         | 485.266207       | 968.541123     | 484.774199       | 9  |
| 22 | 2741.433101        | 1371.220188        | 2724.406552    | 1362.706914        | 2723.422536        | 1362.214906        | D    | <b>873.467624</b>  | 437.237450         | 856.441075         | 428.724175       | 855.457059     | 428.232167       | 8  |
| 23 | 2840.501515        | <b>1420.754395</b> | 2823.474966    | 1412.241121        | 2822.490950        | 1411.749113        | V    | <b>758.440681</b>  | 379.723978         | 741.414132         | 371.210704       | 740.430116     | 370.718696       | 7  |
| 24 | 2937.554279        | 1469.280777        | 2920.527730    | 1460.767503        | 2919.543714        | 1460.275495        | P    | <b>659.372267</b>  | 330.189772         | 642.345718         | 321.676497       | 641.361702     | 321.184489       | 6  |
| 25 | 3024.586307        | 1512.796791        | 3007.559758    | 1504.283517        | 3006.575742        | 1503.791509        | S    | 562.319503         | 281.663389         | 545.292954         | 273.150115       | 544.308938     | 272.658107       | 5  |
| 26 | 3125.633986        | 1563.320631        | 3108.607437    | 1554.807356        | 3107.623421        | 1554.315348        | T    | 475.287475         | 238.147375         | 458.260926         | 229.634101       | 457.276910     | 229.142093       | 4  |
| 27 | 3224.702400        | 1612.854838        | 3207.675851    | 1604.341563        | 3206.691835        | 1603.849555        | V    | 374.239796         | 187.623536         | 357.213247         | 179.110261       |                |                  | 3  |
| 28 | 3352.760978        | 1676.884127        | 3335.734429    | 1668.370852        | 3334.750413        | 1667.878844        | Q    | <b>275.171382</b>  | 138.089329         | 258.144833         | 129.576055       |                |                  | 2  |
| 29 |                    |                    |                |                    |                    |                    | K    | 147.112804         | 74.060040          | 130.086255         | 65.546765        |                |                  | 1  |

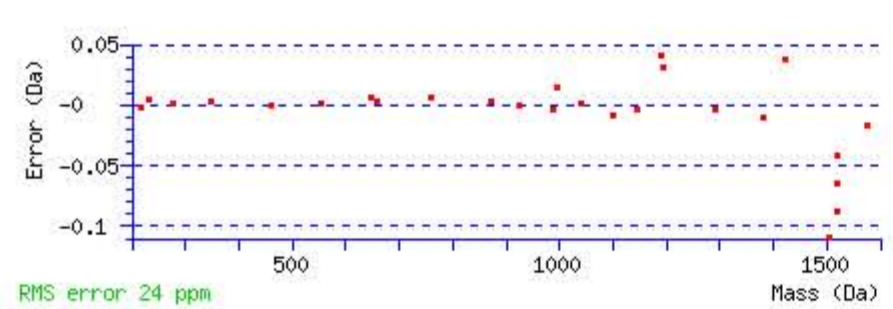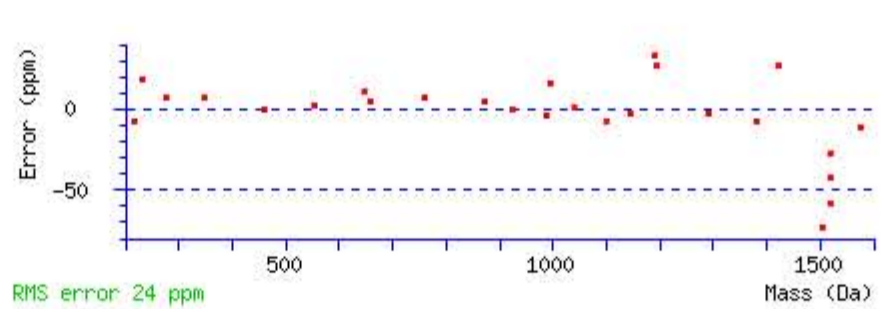

NCBI BLAST search of **TDELPQLVTLPHPNLHGPEILDVPSTVQK**  
 (Parameters: blastp, nr protein database, expect=20000, no filter, PAM30)  
 Other BLAST [web gateways](#)

All matches to this query

| Score | Mr(calc):   | Delta    | Sequence                             |
|-------|-------------|----------|--------------------------------------|
| 26.1  | 3497.859238 | 0.002458 | <b>TDELPQLVTLPHPNLHGPEILDVPSTVQK</b> |

# MASCOT Search Results

## Peptide View

MS/MS Fragmentation of **MCVDVNECQR**

Found in **FBLN1\_HUMAN**, Fibulin-1 OS=Homo sapiens GN=FBLN1 PE=1 SV=4

Match to Query 13702: 1636.683672 from(546.568500,3+) rtinseconds(1542) index(29057)

Title: Locus:1.1.1.3200.9 File:"2013-07-02 CLN FXIII 180 min 3rd F 3.wiff"

Data file C:\Program Files (x86)\Matrix Science\Mascot Daemon\mgf9 FXIII 180 min 3rd\mascot\_daemon\_merge.mgf

Click mouse within plot area to zoom in by factor of two about that point

Or, Plot from  to  Da

Label all possible matches  Label matches used for scoring

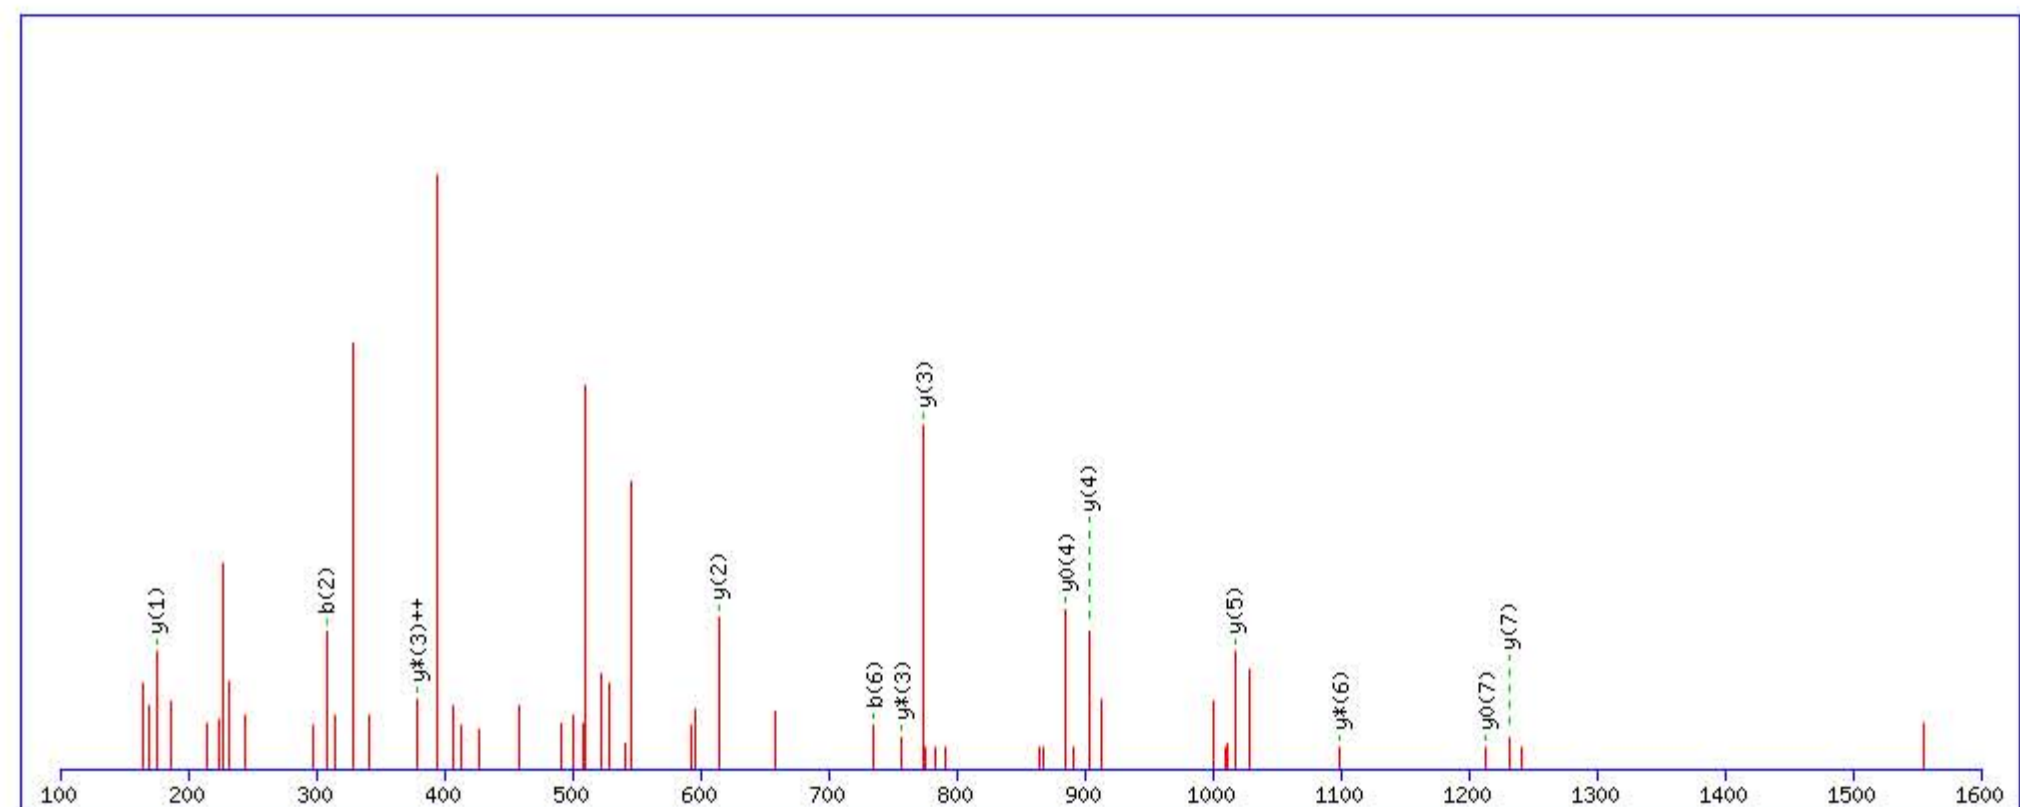

Monoisotopic mass of neutral peptide Mr(calc): 1636.682999

Fixed modifications: Carbamidomethyl (C) (apply to specified residues or termini only)

Variable modifications:

M1 : Oxidation (M), with neutral losses 0.000000 (shown in table), 63.998285

Q9 : Biotin:Thermo-21345 (Q)

Ions Score: 33 Expect: 0.0042

Matches : 13/124 fragment ions using 22 most intense peaks [\(help\)](#)

| #  | b                 | b <sup>++</sup> | b <sup>*</sup> | b <sup>*++</sup> | b <sup>0</sup> | b <sup>0++</sup> | Seq. | y                  | y <sup>++</sup> | y <sup>*</sup>     | y <sup>*++</sup>  | y <sup>0</sup>     | y <sup>0++</sup> | #  |
|----|-------------------|-----------------|----------------|------------------|----------------|------------------|------|--------------------|-----------------|--------------------|-------------------|--------------------|------------------|----|
| 1  | 148.042676        | 74.524976       |                |                  |                |                  | M    |                    |                 |                    |                   |                    |                  | 10 |
| 2  | <b>308.073325</b> | 154.540301      |                |                  |                |                  | C    | 1490.654867        | 745.831072      | 1473.628318        | 737.317797        | 1472.644302        | 736.825789       | 9  |
| 3  | 407.141739        | 204.074508      |                |                  |                |                  | V    | 1330.624218        | 665.815747      | 1313.597669        | 657.302473        | 1312.613653        | 656.810465       | 8  |
| 4  | 522.168682        | 261.587979      |                |                  | 504.158117     | 252.582697       | D    | <b>1231.555804</b> | 616.281540      | 1214.529255        | 607.768266        | <b>1213.545239</b> | 607.276258       | 7  |
| 5  | 621.237096        | 311.122186      |                |                  | 603.226531     | 302.116904       | V    | 1116.528861        | 558.768069      | <b>1099.502312</b> | 550.254794        | 1098.518296        | 549.762786       | 6  |
| 6  | <b>735.280023</b> | 368.143650      | 718.253474     | 359.630375       | 717.269458     | 359.138367       | N    | <b>1017.460447</b> | 509.233862      | 1000.433898        | 500.720587        | 999.449882         | 500.228579       | 5  |
| 7  | 864.322616        | 432.664946      | 847.296067     | 424.151672       | 846.312051     | 423.659664       | E    | <b>903.417520</b>  | 452.212398      | 886.390971         | 443.699124        | <b>885.406955</b>  | 443.207116       | 4  |
| 8  | 1024.353265       | 512.680271      | 1007.326716    | 504.166996       | 1006.342700    | 503.674988       | C    | <b>774.374927</b>  | 387.691102      | <b>757.348378</b>  | <b>379.177827</b> |                    |                  | 3  |
| 9  | 1463.578591       | 732.292934      | 1446.552042    | 723.779659       | 1445.568026    | 723.287651       | Q    | <b>614.344278</b>  | 307.675777      | 597.317729         | 299.162503        |                    |                  | 2  |
| 10 |                   |                 |                |                  |                |                  | R    | <b>175.118952</b>  | 88.063114       | 158.092403         | 79.549839         |                    |                  | 1  |

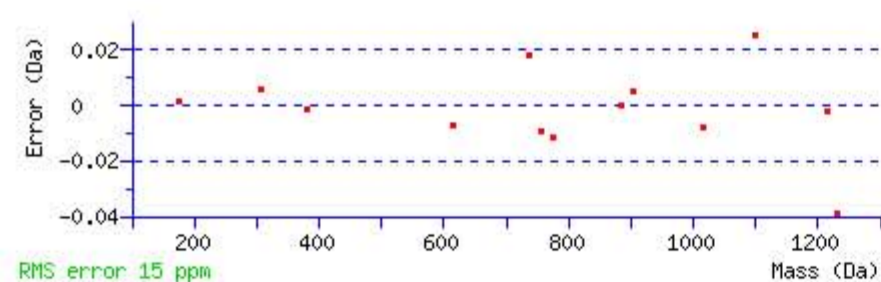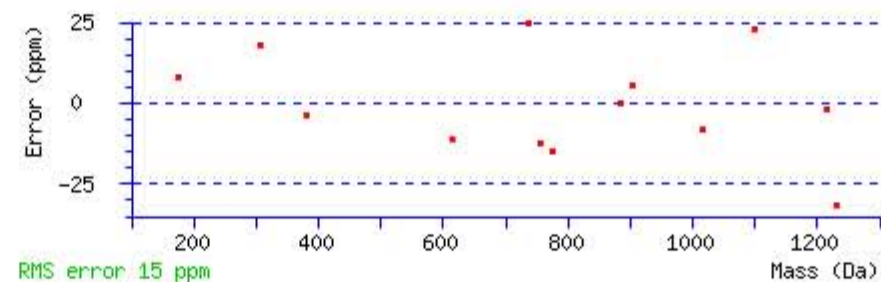

NCBI BLAST search of [MCVDVNECQR](#)

(Parameters: blastp, nr protein database, expect=20000, no filter, PAM30)

Other BLAST [web gateways](#)

All matches to this query

| Score | Mr(calc):   | Delta    | Sequence                   |
|-------|-------------|----------|----------------------------|
| 33.1  | 1636.682999 | 0.000673 | <a href="#">MCVDVNECQR</a> |

Mascot: <http://www.matrixscience.com/>

# MASCOT Search Results

## Peptide View

MS/MS Fragmentation of **SAATLQQEK**

Found in **FBLN1\_HUMAN**, Fibulin-1 OS=Homo sapiens GN=FBLN1 PE=1 SV=4

Match to Query 20085: 1285.665028 from(643.839790,2+) rtinseconds(1521) index(43021)

Title: Locus:1.1.1.3242.8 File:"2013-07-02 CLN FXIII 180 min 3rd F 4.wiff"

Data file C:\Program Files (x86)\Matrix Science\Mascot Daemon\mgf9 FXIII 180 min 3rd\mascot\_daemon\_merge.mgf

Click mouse within plot area to zoom in by factor of two about that point

Or, Plot from  to  Da

Label all possible matches  Label matches used for scoring

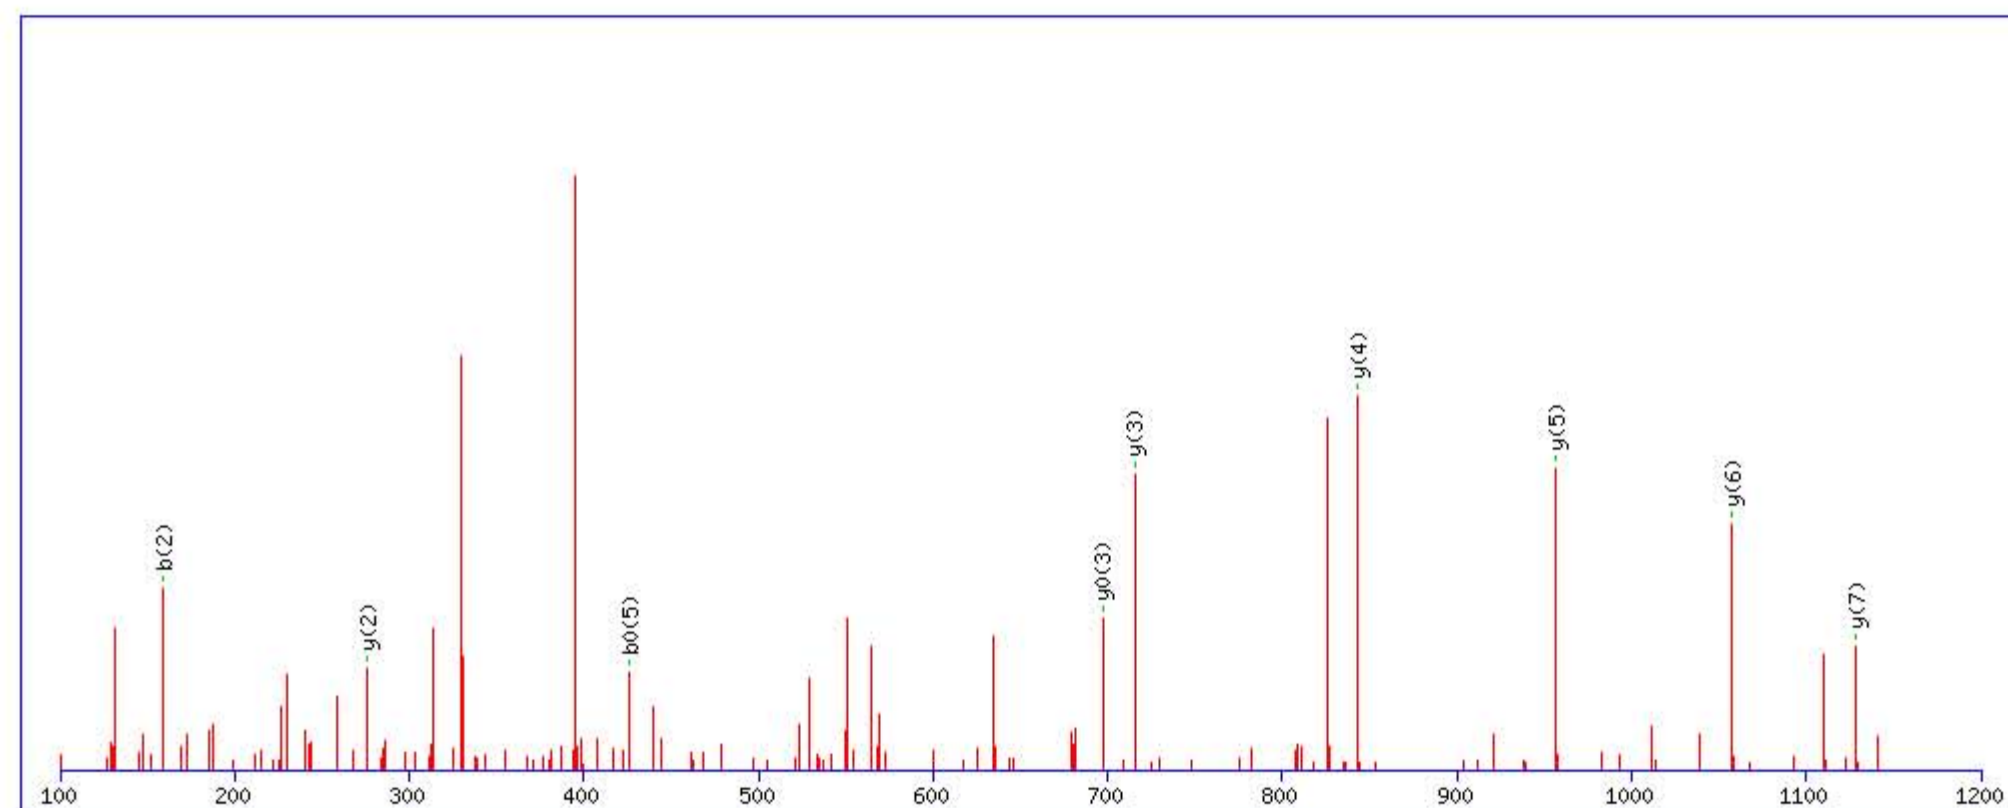

Monoisotopic mass of neutral peptide Mr(calc): 1285.669998

Fixed modifications: Carbamidomethyl (C) (apply to specified residues or termini only)

Variable modifications:

Q7 : Biotin:Thermo-21345 (Q)

Ions Score: 49 Expect: 0.00016

Matches : 9/84 fragment ions using 11 most intense peaks [\(help\)](#)

| # | b                 | b <sup>++</sup> | b <sup>*</sup> | b <sup>*++</sup> | b <sup>0</sup>    | b <sup>0++</sup> | Seq. | y                  | y <sup>++</sup> | y <sup>*</sup> | y <sup>*++</sup> | y <sup>0</sup>    | y <sup>0++</sup> | # |
|---|-------------------|-----------------|----------------|------------------|-------------------|------------------|------|--------------------|-----------------|----------------|------------------|-------------------|------------------|---|
| 1 | 88.039304         | 44.523290       |                |                  | 70.028739         | 35.518008        | S    |                    |                 |                |                  |                   |                  | 9 |
| 2 | <b>159.076418</b> | 80.041847       |                |                  | 141.065853        | 71.036564        | A    | 1199.645272        | 600.326274      | 1182.618723    | 591.813000       | 1181.634707       | 591.320991       | 8 |
| 3 | 230.113532        | 115.560404      |                |                  | 212.102967        | 106.555121       | A    | <b>1128.608158</b> | 564.807717      | 1111.581609    | 556.294443       | 1110.597593       | 555.802435       | 7 |
| 4 | 331.161211        | 166.084243      |                |                  | 313.150646        | 157.078961       | T    | <b>1057.571044</b> | 529.289160      | 1040.544495    | 520.775886       | 1039.560479       | 520.283878       | 6 |
| 5 | 444.245275        | 222.626275      |                |                  | <b>426.234710</b> | 213.620993       | L    | <b>956.523365</b>  | 478.765321      | 939.496816     | 470.252046       | 938.512800        | 469.760038       | 5 |
| 6 | 572.303853        | 286.655565      | 555.277304     | 278.142290       | 554.293288        | 277.650282       | Q    | <b>843.439301</b>  | 422.223289      | 826.412752     | 413.710014       | 825.428736        | 413.218006       | 4 |
| 7 | 1011.529179       | 506.268228      | 994.502630     | 497.754953       | 993.518614        | 497.262945       | Q    | <b>715.380723</b>  | 358.194000      | 698.354174     | 349.680725       | <b>697.370158</b> | 349.188717       | 3 |
| 8 | 1140.571772       | 570.789524      | 1123.545223    | 562.276250       | 1122.561207       | 561.784242       | E    | <b>276.155397</b>  | 138.581336      | 259.128848     | 130.068062       | 258.144832        | 129.576054       | 2 |
| 9 |                   |                 |                |                  |                   |                  | K    | 147.112804         | 74.060040       | 130.086255     | 65.546765        |                   |                  | 1 |

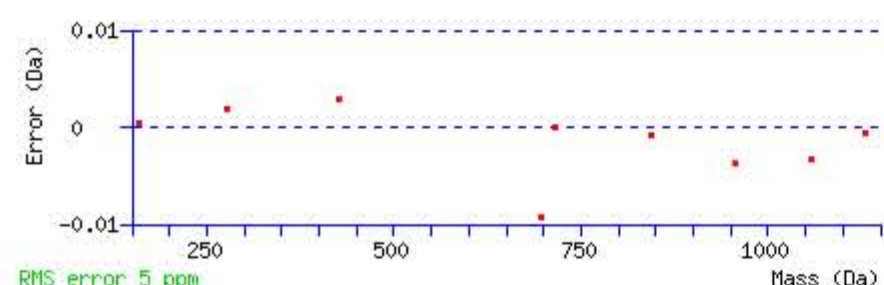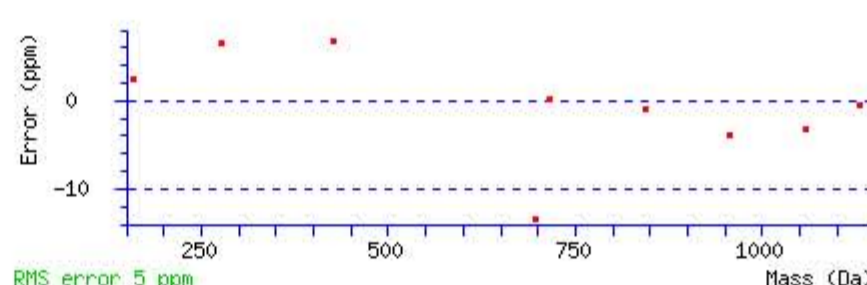

NCBI BLAST search of [SAATLQQEK](#)

(Parameters: blastp, nr protein database, expect=20000, no filter, PAM30)

Other BLAST [web gateways](#)

## All matches to this query

| Score | Mr(calc):   | Delta     | Sequence                      |
|-------|-------------|-----------|-------------------------------|
| 49.0  | 1285.669998 | -0.004970 | <a href="#">SAATLQQEK</a>     |
| 30.2  | 1285.669998 | -0.004970 | <a href="#">SAATLQQEK</a>     |
| 7.9   | 1285.651367 | 0.013661  | <a href="#">LLQAVENGDAEK</a>  |
| 6.3   | 1285.652237 | 0.012791  | <a href="#">AMQIQEQK</a>      |
| 5.7   | 1285.669998 | -0.004970 | <a href="#">ASLDQGKEK</a>     |
| 4.0   | 1285.649582 | 0.015446  | <a href="#">SVPCRCVRR</a>     |
| 2.5   | 1285.662598 | 0.002430  | <a href="#">EARSQVKPEK</a>    |
| 2.0   | 1285.669998 | -0.004970 | <a href="#">KQEEVQK</a>       |
| 1.8   | 1285.651382 | 0.013646  | <a href="#">ALEPTGQSGEAVK</a> |
| 1.5   | 1285.655380 | 0.009648  | <a href="#">KYEFKDLK</a>      |

# MASCOT Search Results

## Peptide View

MS/MS Fragmentation of **SQETGDLVDVGGGLQETDK**

Found in **FBLN1\_HUMAN**, Fibulin-1 OS=Homo sapiens GN=FBLN1 PE=1 SV=4

Match to Query 41643: 2101.975648 from(1051.995100,2+) rtinseconds(2045) index(32136)

Title: Locus:1.1.1.3375.13 File:"2013-07-02 CLN FXIII 180 min 3rd F 3.wiff"

Data file C:\Program Files (x86)\Matrix Science\Mascot Daemon\mgf9 FXIII 180 min 3rd\mascot\_daemon\_merge.mgf

Click mouse within plot area to zoom in by factor of two about that point

Or, Plot from  to  Da

Label all possible matches  Label matches used for scoring

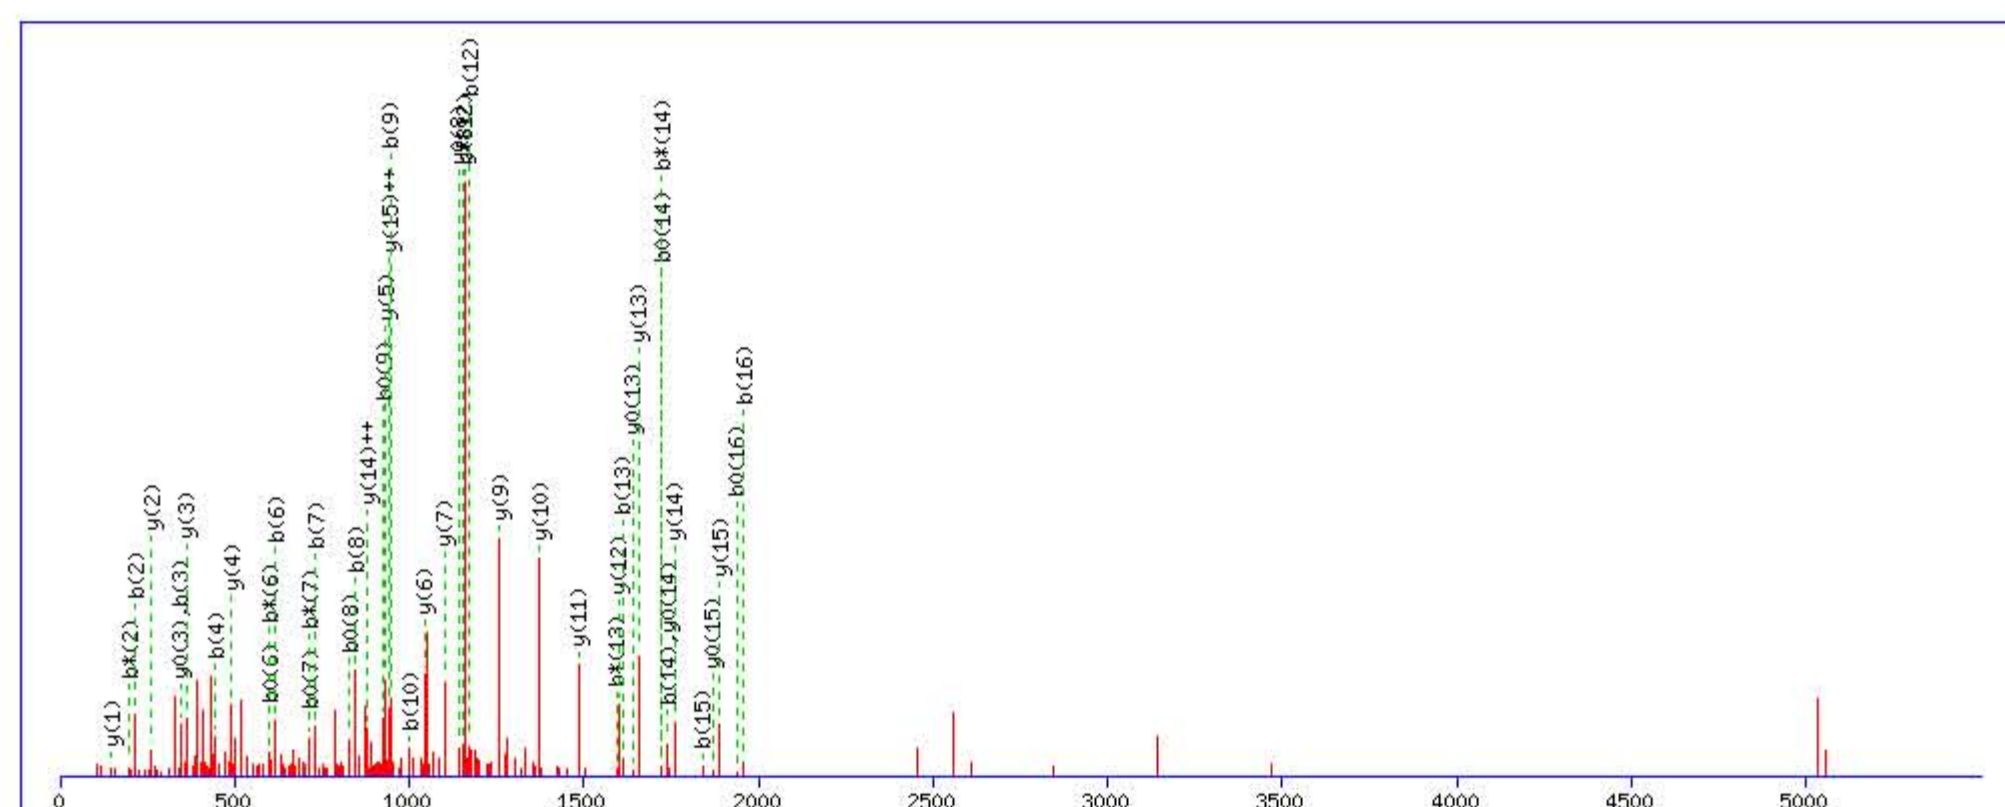

Monoisotopic mass of neutral peptide Mr(calc): 2101.983780

Fixed modifications: Carbamidomethyl (C) (apply to specified residues or termini only)

Variable modifications:

Q13 : Biotin:Thermo-21345 (Q)

Ions Score: 92 Expect: 8.3e-009

Matches : 47/188 fragment ions using 90 most intense peaks [\(help\)](#)

| #  | b                  | b <sup>++</sup> | b <sup>*</sup>     | b <sup>++</sup> | b <sup>0</sup>     | b <sup>0++</sup> | Seq. | y                  | y <sup>++</sup>   | y <sup>*</sup> | y <sup>++</sup> | y <sup>0</sup>     | y <sup>0++</sup> | #  |
|----|--------------------|-----------------|--------------------|-----------------|--------------------|------------------|------|--------------------|-------------------|----------------|-----------------|--------------------|------------------|----|
| 1  | 88.039304          | 44.523290       |                    |                 | 70.028739          | 35.518008        | S    |                    |                   |                |                 |                    |                  | 17 |
| 2  | <b>216.097882</b>  | 108.552579      | <b>199.071333</b>  | 100.039305      | 198.087317         | 99.547296        | Q    | 2015.959015        | 1008.483146       | 1998.932466    | 999.969871      | 1997.948450        | 999.477863       | 16 |
| 3  | <b>345.140475</b>  | 173.073875      | 328.113926         | 164.560601      | 327.129910         | 164.068593       | E    | <b>1887.900437</b> | <b>944.453857</b> | 1870.873888    | 935.940582      | <b>1869.889872</b> | 935.448574       | 15 |
| 4  | <b>446.188154</b>  | 223.597715      | 429.161605         | 215.084441      | 428.177589         | 214.592433       | T    | <b>1758.857844</b> | <b>879.932560</b> | 1741.831295    | 871.419286      | <b>1740.847279</b> | 870.927278       | 14 |
| 5  | 503.209618         | 252.108447      | 486.183069         | 243.595172      | 485.199053         | 243.103164       | G    | <b>1657.810165</b> | 829.408721        | 1640.783616    | 820.895446      | <b>1639.799600</b> | 820.403438       | 13 |
| 6  | <b>618.236561</b>  | 309.621919      | <b>601.210012</b>  | 301.108644      | <b>600.225996</b>  | 300.616636       | D    | <b>1600.788701</b> | 800.897989        | 1583.762152    | 792.384714      | 1582.778136        | 791.892706       | 12 |
| 7  | <b>731.320625</b>  | 366.163951      | <b>714.294076</b>  | 357.650676      | <b>713.310060</b>  | 357.158668       | L    | <b>1485.761758</b> | 743.384517        | 1468.735209    | 734.871243      | 1467.751193        | 734.379235       | 11 |
| 8  | <b>846.347568</b>  | 423.677422      | 829.321019         | 415.164148      | <b>828.337003</b>  | 414.672140       | D    | <b>1372.677694</b> | 686.842485        | 1355.651145    | 678.329211      | 1354.667129        | 677.837203       | 10 |
| 9  | <b>945.415982</b>  | 473.211629      | 928.389433         | 464.698354      | <b>927.405417</b>  | 464.206347       | V    | <b>1257.650751</b> | 629.329014        | 1240.624202    | 620.815739      | 1239.640186        | 620.323731       | 9  |
| 10 | <b>1002.437446</b> | 501.722361      | 985.410897         | 493.209087      | 984.426881         | 492.717079       | G    | <b>1158.582337</b> | 579.794807        | 1141.555788    | 571.281532      | <b>1140.571772</b> | 570.789524       | 8  |
| 11 | 1059.458910        | 530.233093      | 1042.432361        | 521.719819      | 1041.448345        | 521.227811       | G    | <b>1101.560873</b> | 551.284075        | 1084.534324    | 542.770800      | 1083.550308        | 542.278792       | 7  |
| 12 | <b>1172.542974</b> | 586.775125      | <b>1155.516425</b> | 578.261851      | 1154.532409        | 577.769842       | L    | <b>1044.539409</b> | 522.773343        | 1027.512860    | 514.260068      | 1026.528844        | 513.768060       | 6  |
| 13 | <b>1611.768300</b> | 806.387788      | <b>1594.741751</b> | 797.874514      | 1593.757735        | 797.382505       | Q    | <b>931.455345</b>  | 466.231311        | 914.428796     | 457.718036      | 913.444780         | 457.226028       | 5  |
| 14 | <b>1740.810893</b> | 870.909085      | <b>1723.784344</b> | 862.395810      | <b>1722.800328</b> | 861.903802       | E    | <b>492.230019</b>  | 246.618648        | 475.203470     | 238.105373      | 474.219454         | 237.613365       | 4  |
| 15 | <b>1841.858572</b> | 921.432924      | 1824.832023        | 912.919650      | 1823.848007        | 912.427642       | T    | <b>363.187426</b>  | 182.097351        | 346.160877     | 173.584077      | <b>345.176861</b>  | 173.092069       | 3  |
| 16 | <b>1956.885515</b> | 978.946396      | 1939.858966        | 970.433121      | <b>1938.874950</b> | 969.941113       | D    | <b>262.139747</b>  | 131.573512        | 245.113198     | 123.060237      | 244.129182         | 122.568229       | 2  |
| 17 |                    |                 |                    |                 |                    |                  | K    | <b>147.112804</b>  | 74.060040         | 130.086255     | 65.546765       |                    |                  | 1  |

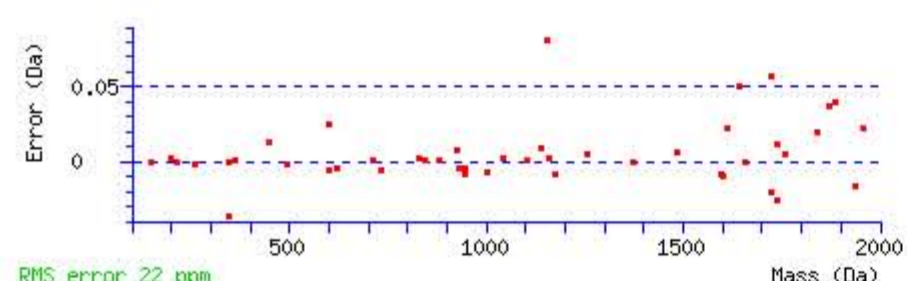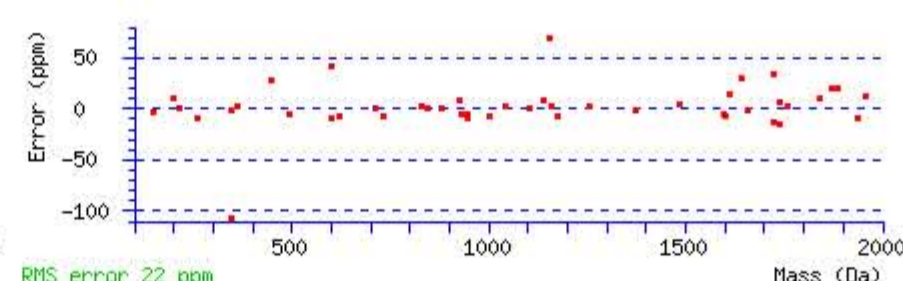

NCBI BLAST search of **SQETGDLVDVGGGLQETDK**

(Parameters: blastp, nr protein database, expect=20000, no filter, PAM30)

Other BLAST [web gateways](#)

All matches to this query

| Score | Mr(calc):   | Delta     | Sequence                            |
|-------|-------------|-----------|-------------------------------------|
| 91.8  | 2101.983780 | -0.008132 | <a href="#">SQETGDLVDVGGGLQETDK</a> |
| 5.4   | 2101.988480 | -0.012832 | <a href="#">MQQVGGNSQTESSLPGR</a>   |
| 4.2   | 2101.978729 | -0.003081 | <a href="#">KSFMMIKYMHDHYLDK</a>    |
| 4.2   | 2101.978729 | -0.003081 | <a href="#">KSFMMLKYMHDHYLDK</a>    |
| 4.0   | 2101.978729 | -0.003081 | <a href="#">KSFMMIKYMHDHYLDK</a>    |
| 4.0   | 2101.978729 | -0.003081 | <a href="#">KSFMMLKYMHDHYLDK</a>    |
| 3.6   | 2101.959503 | 0.016145  | <a href="#">GNCQTQGDSILDCVPK</a>    |
| 3.6   | 2101.959503 | 0.016145  | <a href="#">GNCQTQGDSILDCVPK</a>    |
| 3.1   | 2101.978729 | -0.003081 | <a href="#">KSFMMIKYMHDHYLDK</a>    |
| 3.1   | 2101.978729 | -0.003081 | <a href="#">KSFMMLKYMHDHYLDK</a>    |

# MASCOT Search Results

## Peptide View

MS/MS Fragmentation of **AITPPHPASQANIIFDITEGNLR**

Found in **FBLN1\_HUMAN**, Fibulin-1 OS=Homo sapiens GN=FBLN1 PE=1 SV=4

Match to Query 51337: 2785.457232 from(929.493020,3+) rtinseconds(2721) index(36004)

Title: Locus:1.1.1.3610.17 File:"2013-07-02 CLN FXIII 180 min 3rd F 3.wiff"

Data file C:\Program Files (x86)\Matrix Science\Mascot Daemon\mgf9 FXIII 180 min 3rd\mascot\_daemon\_merge.mgf

Click mouse within plot area to zoom in by factor of two about that point

Or, Plot from  to  Da

Label all possible matches  Label matches used for scoring

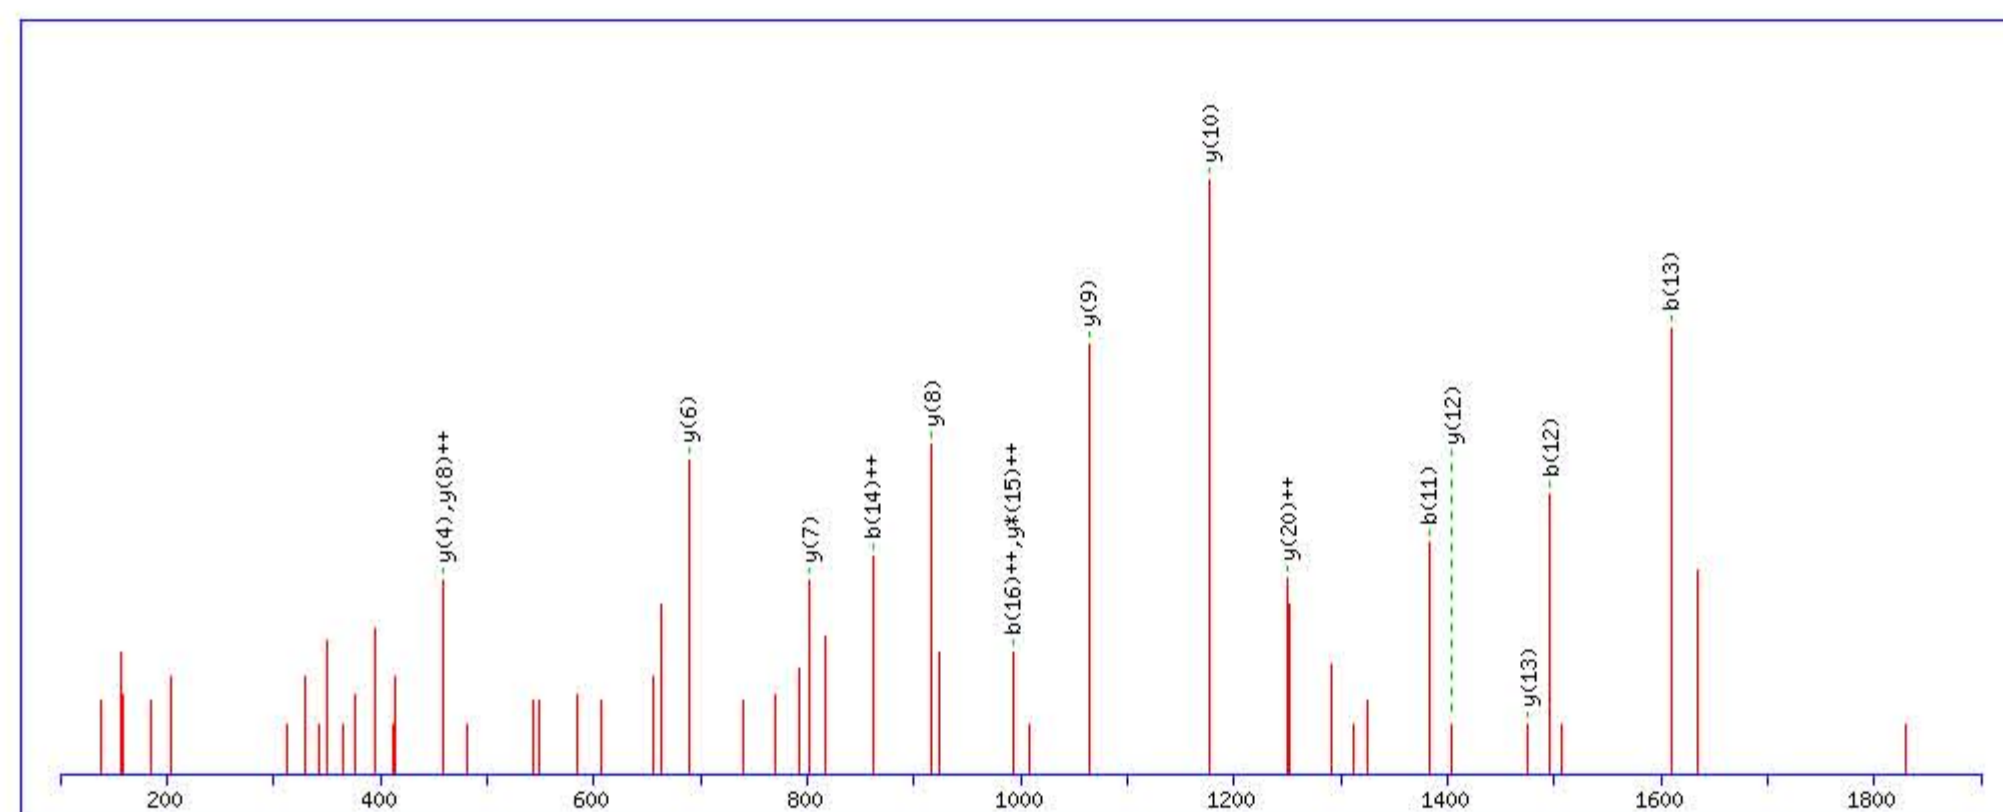

Monoisotopic mass of neutral peptide Mr(calc): 2785.458496

Fixed modifications: Carbamidomethyl (C) (apply to specified residues or termini only)

Variable modifications:

Q10 : Biotin:Thermo-21345 (Q)

Ions Score: 35 Expect: 0.0076

Matches : 16/234 fragment ions using 29 most intense peaks [\(help\)](#)

| #  | b                  | b <sup>++</sup>   | b <sup>*</sup> | b <sup>*++</sup> | b <sup>0</sup> | b <sup>0++</sup> | Seq. | y                  | y <sup>++</sup>    | y <sup>*</sup> | y <sup>*++</sup>  | y <sup>0</sup> | y <sup>0++</sup> | #  |
|----|--------------------|-------------------|----------------|------------------|----------------|------------------|------|--------------------|--------------------|----------------|-------------------|----------------|------------------|----|
| 1  | 72.044390          | 36.525833         |                |                  |                |                  | A    |                    |                    |                |                   |                |                  | 23 |
| 2  | 185.128454         | 93.067865         |                |                  |                |                  | I    | 2715.428684        | 1358.217980        | 2698.402135    | 1349.704705       | 2697.418119    | 1349.212697      | 22 |
| 3  | 286.176133         | 143.591704        |                |                  | 268.165568     | 134.586422       | T    | 2602.344620        | 1301.675948        | 2585.318071    | 1293.162673       | 2584.334055    | 1292.670665      | 21 |
| 4  | 383.228897         | 192.118087        |                |                  | 365.218332     | 183.112804       | P    | 2501.296941        | <b>1251.152108</b> | 2484.270392    | 1242.638834       | 2483.286376    | 1242.146826      | 20 |
| 5  | 480.281661         | 240.644469        |                |                  | 462.271096     | 231.639186       | P    | 2404.244177        | 1202.625726        | 2387.217628    | 1194.112452       | 2386.233612    | 1193.620444      | 19 |
| 6  | 617.340573         | 309.173925        |                |                  | 599.330008     | 300.168642       | H    | 2307.191413        | 1154.099344        | 2290.164864    | 1145.586070       | 2289.180848    | 1145.094062      | 18 |
| 7  | 714.393337         | 357.700307        |                |                  | 696.382772     | 348.695024       | P    | 2170.132501        | 1085.569888        | 2153.105952    | 1077.056614       | 2152.121936    | 1076.564606      | 17 |
| 8  | 785.430451         | 393.218864        |                |                  | 767.419886     | 384.213581       | A    | 2073.079737        | 1037.043506        | 2056.053188    | 1028.530232       | 2055.069172    | 1028.038224      | 16 |
| 9  | 872.462479         | 436.734878        |                |                  | 854.451914     | 427.729595       | S    | 2002.042623        | 1001.524950        | 1985.016074    | <b>993.011675</b> | 1984.032058    | 992.519667       | 15 |
| 10 | 1311.687805        | 656.347541        | 1294.661256    | 647.834266       | 1293.677240    | 647.342258       | Q    | 1915.010595        | 958.008936         | 1897.984046    | 949.495661        | 1897.000030    | 949.003653       | 14 |
| 11 | <b>1382.724919</b> | 691.866098        | 1365.698370    | 683.352823       | 1364.714354    | 682.860815       | A    | <b>1475.785269</b> | 738.396273         | 1458.758720    | 729.882998        | 1457.774704    | 729.390990       | 13 |
| 12 | <b>1496.767846</b> | 748.887561        | 1479.741297    | 740.374287       | 1478.757281    | 739.882278       | N    | <b>1404.748155</b> | 702.877716         | 1387.721606    | 694.364441        | 1386.737590    | 693.872433       | 12 |
| 13 | <b>1609.851910</b> | 805.429593        | 1592.825361    | 796.916318       | 1591.841345    | 796.424310       | I    | 1290.705228        | 645.856252         | 1273.678679    | 637.342978        | 1272.694663    | 636.850970       | 11 |
| 14 | 1722.935974        | <b>861.971625</b> | 1705.909425    | 853.458350       | 1704.925409    | 852.966342       | I    | <b>1177.621164</b> | 589.314220         | 1160.594615    | 580.800946        | 1159.610599    | 580.308938       | 10 |
| 15 | 1870.004388        | 935.505832        | 1852.977839    | 926.992557       | 1851.993823    | 926.500549       | F    | <b>1064.537100</b> | 532.772188         | 1047.510551    | 524.258914        | 1046.526535    | 523.766906       | 9  |
| 16 | 1985.031331        | <b>993.019303</b> | 1968.004782    | 984.506029       | 1967.020766    | 984.014021       | D    | <b>917.468686</b>  | <b>459.237981</b>  | 900.442137     | 450.724707        | 899.458121     | 450.232699       | 8  |
| 17 | 2098.115395        | 1049.561335       | 2081.088846    | 1041.048061      | 2080.104830    | 1040.556053      | I    | <b>802.441743</b>  | 401.724510         | 785.415194     | 393.211235        | 784.431178     | 392.719227       | 7  |
| 18 | 2199.163074        | 1100.085175       | 2182.136525    | 1091.571900      | 2181.152509    | 1091.079892      | T    | <b>689.357679</b>  | 345.182478         | 672.331130     | 336.669203        | 671.347114     | 336.177195       | 6  |
| 19 | 2328.205667        | 1164.606471       | 2311.179118    | 1156.093197      | 2310.195102    | 1155.601189      | E    | 588.310000         | 294.658638         | 571.283451     | 286.145364        | 570.299435     | 285.653356       | 5  |
| 20 | 2385.227131        | 1193.117203       | 2368.200582    | 1184.603929      | 2367.216566    | 1184.111921      | G    | <b>459.267407</b>  | 230.137341         | 442.240858     | 221.624067        |                |                  | 4  |
| 21 | 2499.270058        | 1250.138667       | 2482.243509    | 1241.625392      | 2481.259493    | 1241.133384      | N    | 402.245943         | 201.626610         | 385.219394     | 193.113335        |                |                  | 3  |
| 22 | 2612.354122        | 1306.680699       | 2595.327573    | 1298.167424      | 2594.343557    | 1297.675416      | L    | 288.203016         | 144.605146         | 271.176467     | 136.091872        |                |                  | 2  |
| 23 |                    |                   |                |                  |                |                  | R    | 175.118952         | 88.063114          | 158.092403     | 79.549839         |                |                  | 1  |

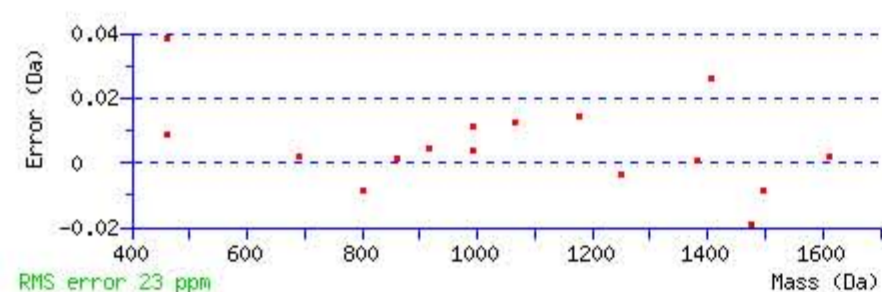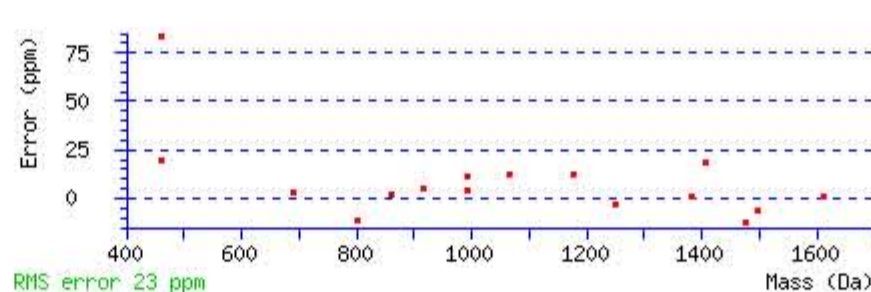

NCBI BLAST search of **AITPPHPASQANIIFDITEGNLR**  
 (Parameters: blastp, nr protein database, expect=20000, no filter, PAM30)  
 Other BLAST [web gateways](#)

### All matches to this query

| Score | Mr(calc):   | Delta     | Sequence                       |
|-------|-------------|-----------|--------------------------------|
| 35.2  | 2785.458496 | -0.001264 | <b>AITPPHPASQANIIFDITEGNLR</b> |



# MASCOT Search Results

## Peptide View

MS/MS Fragmentation of **MVQEQCCHSQLEELHCATGISLANEQDR**  
Found in **FBLN1\_HUMAN**, Fibulin-1 OS=Homo sapiens GN=FBLN1 PE=1 SV=4

Match to Query 60712: 3653.611256 from(914.410090,4+) rtinseconds(2002) index(31903)  
Title: Locus:1.1.1.3360.25 File:"2013-07-02 CLN FXIII 180 min 3rd F 3.wiff"  
Data file C:\Program Files (x86)\Matrix Science\Mascot Daemon\mgf9 FXIII 180 min 3rd\mascot\_daemon\_merge.mgf

Click mouse within plot area to zoom in by factor of two about that point

Or, Plot from  to  Da

Label all possible matches  Label matches used for scoring

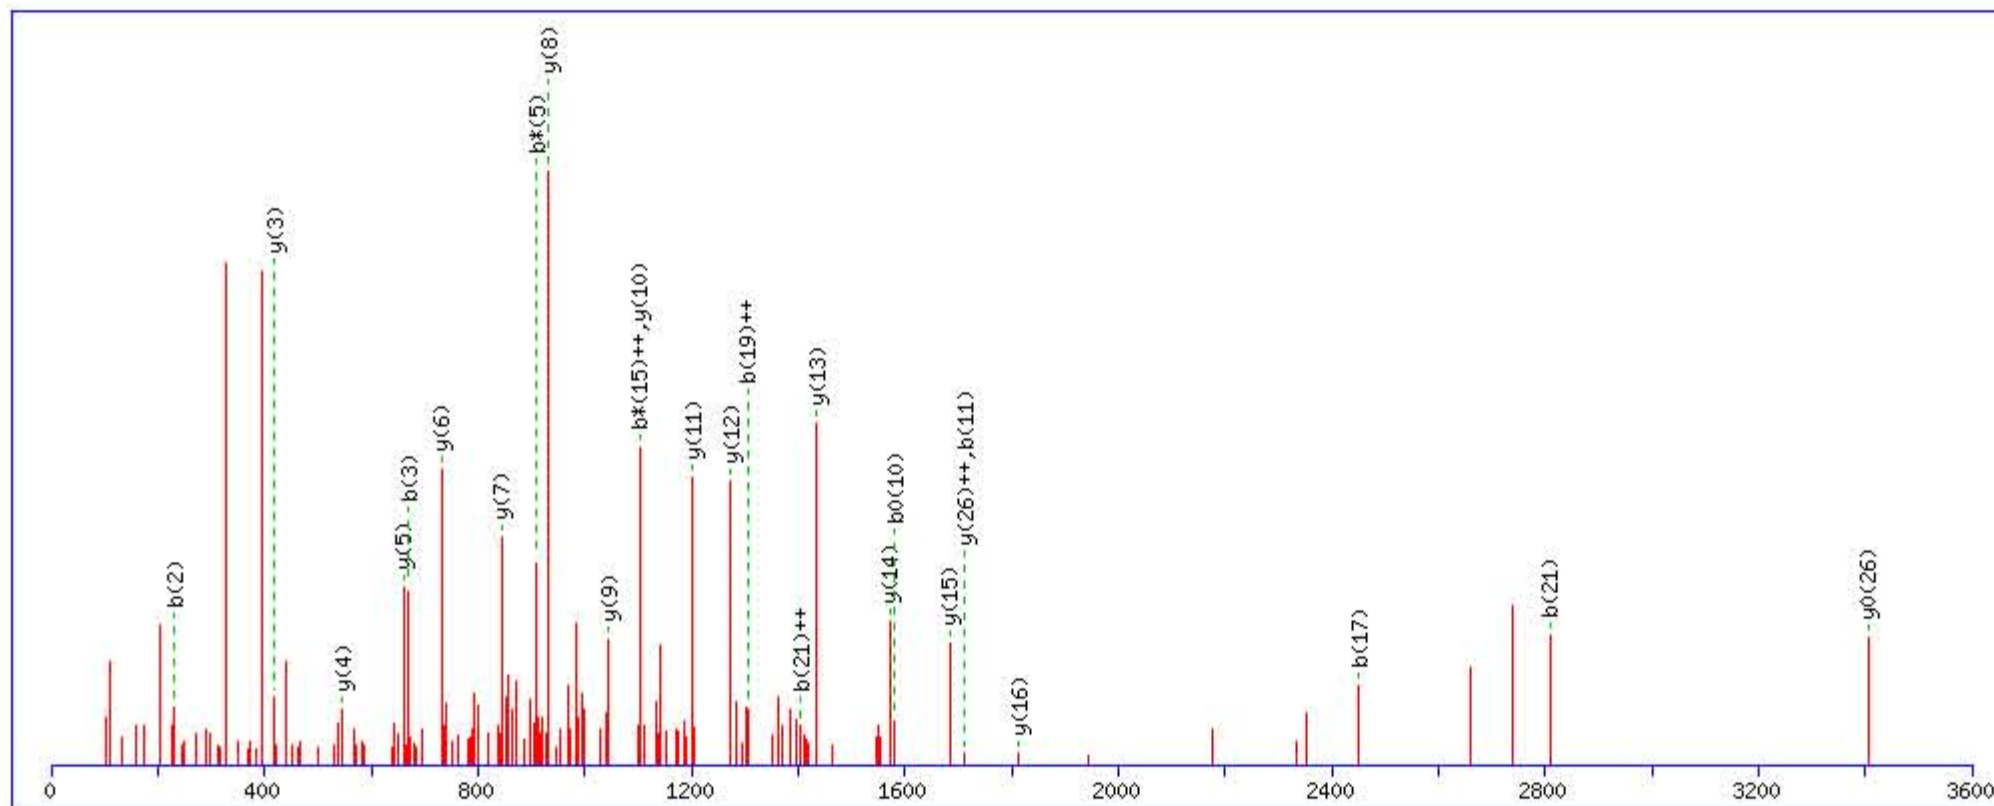

Monoisotopic mass of neutral peptide  $M_r(\text{calc})$ : 3653.615311  
Fixed modifications: Carbamidomethyl (C) (apply to specified residues or termini only)  
Variable modifications:  
Q3 : Biotin:Thermo-21345 (Q)  
Ions Score: 79 Expect: 8.2e-008  
Matches : 26/312 fragment ions using 42 most intense peaks ([help](#))

| #  | b                  | b <sup>++</sup>    | b <sup>*</sup>    | b <sup>*++</sup>   | b <sup>0</sup>     | b <sup>0++</sup> | Seq.     | y                  | y <sup>++</sup>    | y <sup>*</sup> | y <sup>*++</sup> | y <sup>0</sup>     | y <sup>0++</sup> | #  |
|----|--------------------|--------------------|-------------------|--------------------|--------------------|------------------|----------|--------------------|--------------------|----------------|------------------|--------------------|------------------|----|
| 1  | 132.047761         | 66.527518          |                   |                    |                    |                  | <b>M</b> |                    |                    |                |                  |                    |                  | 28 |
| 2  | <b>231.116175</b>  | 116.061725         |                   |                    |                    |                  | <b>V</b> | 3523.582122        | 1762.294699        | 3506.555573    | 1753.781424      | 3505.571557        | 1753.289416      | 27 |
| 3  | <b>670.341501</b>  | 335.674389         | 653.314952        | 327.161114         |                    |                  | <b>Q</b> | 3424.513708        | <b>1712.760492</b> | 3407.487159    | 1704.247217      | <b>3406.503143</b> | 1703.755209      | 26 |
| 4  | 799.384094         | 400.195685         | 782.357545        | 391.682411         | 781.373529         | 391.190403       | <b>E</b> | 2985.288382        | 1493.147829        | 2968.261833    | 1484.634554      | 2967.277817        | 1484.142546      | 25 |
| 5  | 927.442672         | 464.224974         | <b>910.416123</b> | 455.711700         | 909.432107         | 455.219692       | <b>Q</b> | 2856.245789        | 1428.626532        | 2839.219240    | 1420.113258      | 2838.235224        | 1419.621250      | 24 |
| 6  | 1087.473321        | 544.240299         | 1070.446772       | 535.727024         | 1069.462756        | 535.235016       | <b>C</b> | 2728.187211        | 1364.597243        | 2711.160662    | 1356.083969      | 2710.176646        | 1355.591961      | 23 |
| 7  | 1247.503970        | 624.255623         | 1230.477421       | 615.742349         | 1229.493405        | 615.250341       | <b>C</b> | 2568.156562        | 1284.581919        | 2551.130013    | 1276.068644      | 2550.145997        | 1275.576636      | 22 |
| 8  | 1384.562882        | 692.785079         | 1367.536333       | 684.271805         | 1366.552317        | 683.779797       | <b>H</b> | 2408.125913        | 1204.566594        | 2391.099364    | 1196.053320      | 2390.115348        | 1195.561312      | 21 |
| 9  | 1471.594910        | 736.301093         | 1454.568361       | 727.787819         | 1453.584345        | 727.295811       | <b>S</b> | 2271.067001        | 1136.037138        | 2254.040452    | 1127.523864      | 2253.056436        | 1127.031856      | 20 |
| 10 | 1599.653488        | 800.330382         | 1582.626939       | 791.817108         | <b>1581.642923</b> | 791.325100       | <b>Q</b> | 2184.034973        | 1092.521124        | 2167.008424    | 1084.007850      | 2166.024408        | 1083.515842      | 19 |
| 11 | <b>1712.737552</b> | 856.872414         | 1695.711003       | 848.359140         | 1694.726987        | 847.867132       | <b>L</b> | 2055.976395        | 1028.491835        | 2038.949846    | 1019.978561      | 2037.965830        | 1019.486553      | 18 |
| 12 | 1841.780145        | 921.393711         | 1824.753596       | 912.880436         | 1823.769580        | 912.388428       | <b>E</b> | 1942.892331        | 971.949804         | 1925.865782    | 963.436529       | 1924.881766        | 962.944521       | 17 |
| 13 | 1970.822738        | 985.915007         | 1953.796189       | 977.401733         | 1952.812173        | 976.909725       | <b>E</b> | <b>1813.849738</b> | 907.428507         | 1796.823189    | 898.915233       | 1795.839173        | 898.423225       | 16 |
| 14 | 2083.906802        | 1042.457039        | 2066.880253       | 1033.943764        | 2065.896237        | 1033.451756      | <b>L</b> | <b>1684.807145</b> | 842.907211         | 1667.780596    | 834.393936       | 1666.796580        | 833.901928       | 15 |
| 15 | 2220.965714        | 1110.986495        | 2203.939165       | <b>1102.473220</b> | 2202.955149        | 1101.981212      | <b>H</b> | <b>1571.723081</b> | 786.365179         | 1554.696532    | 777.851904       | 1553.712516        | 777.359896       | 14 |
| 16 | 2380.996363        | 1191.001819        | 2363.969814       | 1182.488545        | 2362.985798        | 1181.996537      | <b>C</b> | <b>1434.664169</b> | 717.835723         | 1417.637620    | 709.322448       | 1416.653604        | 708.830440       | 13 |
| 17 | <b>2452.033477</b> | 1226.520376        | 2435.006928       | 1218.007102        | 2434.022912        | 1217.515094      | <b>A</b> | <b>1274.633520</b> | 637.820398         | 1257.606971    | 629.307124       | 1256.622955        | 628.815116       | 12 |
| 18 | 2553.081156        | 1277.044216        | 2536.054607       | 1268.530941        | 2535.070591        | 1268.038933      | <b>T</b> | <b>1203.596406</b> | 602.301841         | 1186.569857    | 593.788567       | 1185.585841        | 593.296559       | 11 |
| 19 | 2610.102620        | <b>1305.554948</b> | 2593.076071       | 1297.041673        | 2592.092055        | 1296.549665      | <b>G</b> | <b>1102.548727</b> | 551.778002         | 1085.522178    | 543.264727       | 1084.538162        | 542.772719       | 10 |
| 20 | 2723.186684        | 1362.096980        | 2706.160135       | 1353.583705        | 2705.176119        | 1353.091697      | <b>I</b> | <b>1045.527263</b> | 523.267270         | 1028.500714    | 514.753995       | 1027.516698        | 514.261987       | 9  |
| 21 | <b>2810.218712</b> | <b>1405.612994</b> | 2793.192163       | 1397.099719        | 2792.208147        | 1396.607711      | <b>S</b> | <b>932.443199</b>  | 466.725238         | 915.416650     | 458.211963       | 914.432634         | 457.719955       | 8  |
| 22 | 2923.302776        | 1462.155026        | 2906.276227       | 1453.641751        | 2905.292211        | 1453.149743      | <b>L</b> | <b>845.411171</b>  | 423.209224         | 828.384622     | 414.695949       | 827.400606         | 414.203941       | 7  |
| 23 | 2994.339890        | 1497.673583        | 2977.313341       | 1489.160308        | 2976.329325        | 1488.668301      | <b>A</b> | <b>732.327107</b>  | 366.667192         | 715.300558     | 358.153917       | 714.316542         | 357.661909       | 6  |
| 24 | 3108.382817        | 1554.695047        | 3091.356268       | 1546.181772        | 3090.372252        | 1545.689764      | <b>N</b> | <b>661.289993</b>  | 331.148635         | 644.263444     | 322.635360       | 643.279428         | 322.143352       | 5  |
| 25 | 3237.425410        | 1619.216343        | 3220.398861       | 1610.703069        | 3219.414845        | 1610.211061      | <b>E</b> | <b>547.247066</b>  | 274.127171         | 530.220517     | 265.613897       | 529.236501         | 265.121889       | 4  |
| 26 | 3365.483988        | 1683.245632        | 3348.457439       | 1674.732358        | 3347.473423        | 1674.240350      | <b>Q</b> | <b>418.204473</b>  | 209.605874         | 401.177924     | 201.092600       | 400.193908         | 200.600592       | 3  |
| 27 | 3480.510931        | 1740.759104        | 3463.484382       | 1732.245829        | 3462.500366        | 1731.753821      | <b>D</b> | 290.145895         | 145.576585         | 273.119346     | 137.063311       | 272.135330         | 136.571303       | 2  |
| 28 |                    |                    |                   |                    |                    |                  | <b>R</b> | 175.118952         | 88.063114          | 158.092403     | 79.549839        |                    |                  | 1  |

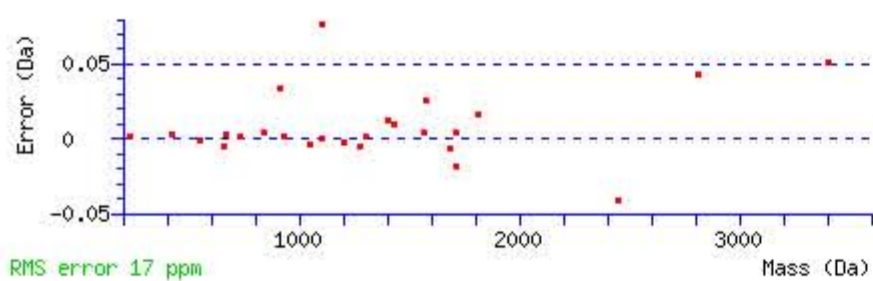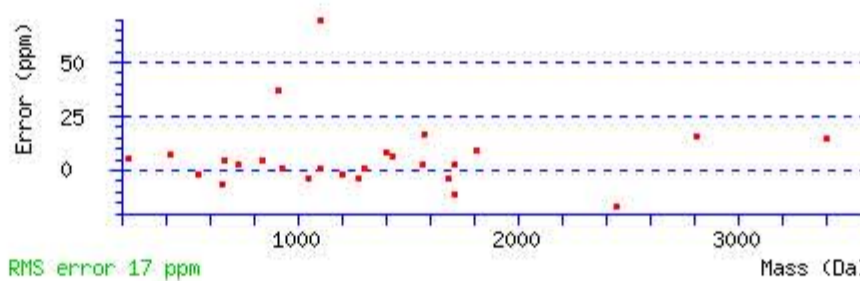

NCBI BLAST search of [MVQEQCCHSQLEELHCATGISLANEQDR](#)  
(Parameters: blastp, nr protein database, expect=20000, no filter, PAM30)  
Other BLAST [web gateways](#)

### All matches to this query

| Score | $M_r(\text{calc})$ | Delta     | Sequence                                     |
|-------|--------------------|-----------|----------------------------------------------|
| 78.9  | 3653.615311        | -0.004055 | <a href="#">MVQEQCCHSQLEELHCATGISLANEQDR</a> |
| 76.5  | 3653.615311        | -0.004055 | <a href="#">MVQEQCCHSQLEELHCATGISLANEQDR</a> |
| 76.4  | 3653.615311        | -0.004055 | <a href="#">MVQEQCCHSQLEELHCATGISLANEQDR</a> |

# {MATRIX} SCIENCE Mascot Search Results

## Peptide View

MS/MS Fragmentation of **MVQEQCCHSQLEELHCATGISLANEQDR**

Found in **FBLN1\_HUMAN**, Fibulin-1 OS=Homo sapiens GN=FBLN1 PE=1 SV=4

Match to Query 60713: 3653.611256 from(914.410090,4+) rtinseconds(1993) index(31828)

Title: Locus: 1.1.1.3357.25 File: "2013-07-02 CLN FXIII 180 min 3rd F 3.wiff"

Data file C:\Program Files (x86)\Matrix Science\Mascot Daemon\mgf9 FXIII 180 min 3rd\mascot\_daemon\_merge.mgf

Click mouse within plot area to zoom in by factor of two about that point

Or, Plot from 0 to 3800 Da Full range

Label all possible matches Label matches used for scoring

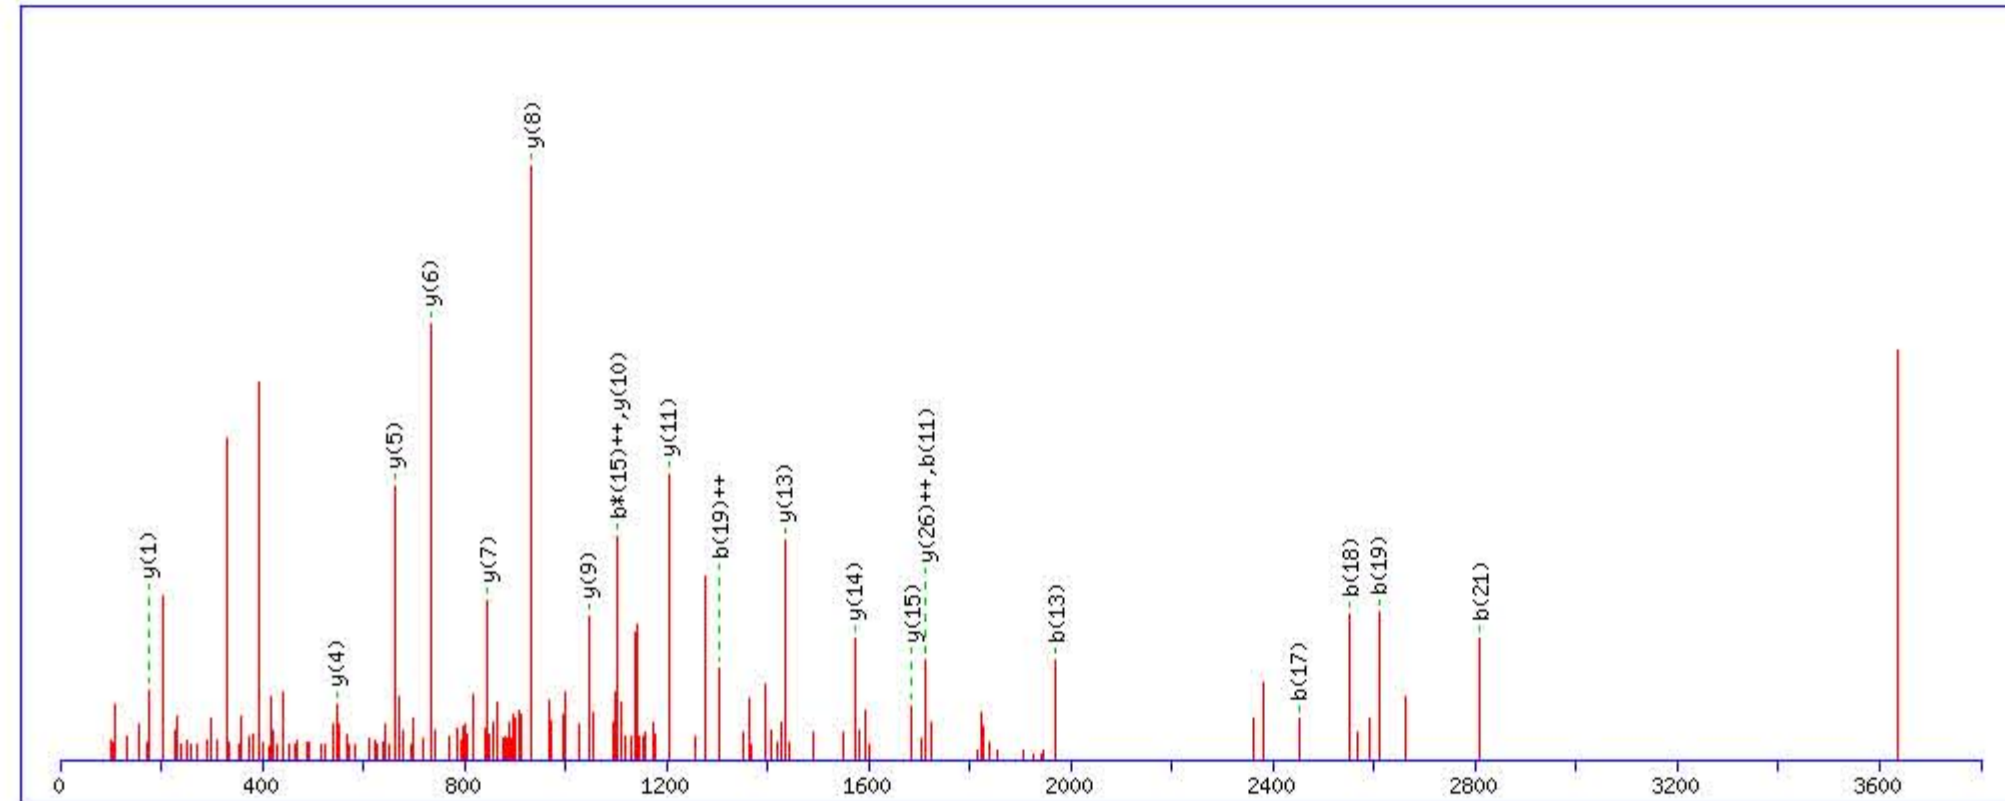

Monoisotopic mass of neutral peptide  $M_r(\text{calc})$ : 3653.615311

Fixed modifications: Carbamidomethyl (C) (apply to specified residues or termini only)

Variable modifications:

Q10 : Biotin:Thermo-21345 (Q)

Ions Score: 85 Expect: 2.2e-008

Matches : 21/312 fragment ions using 25 most intense peaks [\(help\)](#)

| #  | b           | b <sup>++</sup> | b <sup>*</sup> | b <sup>*++</sup> | b <sup>0</sup> | b <sup>0++</sup> | Seq. | y           | y <sup>++</sup> | y <sup>*</sup> | y <sup>*++</sup> | y <sup>0</sup> | y <sup>0++</sup> | #  |
|----|-------------|-----------------|----------------|------------------|----------------|------------------|------|-------------|-----------------|----------------|------------------|----------------|------------------|----|
| 1  | 132.047761  | 66.527518       |                |                  |                |                  | M    |             |                 |                |                  |                |                  | 28 |
| 2  | 231.116175  | 116.061725      |                |                  |                |                  | V    | 3523.582122 | 1762.294699     | 3506.555573    | 1753.781424      | 3505.571557    | 1753.289416      | 27 |
| 3  | 359.174753  | 180.091015      | 342.148204     | 171.577740       |                |                  | Q    | 3424.513708 | 1712.760492     | 3407.487159    | 1704.247217      | 3406.503143    | 1703.755209      | 26 |
| 4  | 488.217346  | 244.612311      | 471.190797     | 236.099037       | 470.206781     | 235.607029       | E    | 3296.455130 | 1648.731203     | 3279.428581    | 1640.217928      | 3278.444565    | 1639.725920      | 25 |
| 5  | 616.275924  | 308.641600      | 599.249375     | 300.128326       | 598.265359     | 299.636318       | Q    | 3167.412537 | 1584.209906     | 3150.385988    | 1575.696632      | 3149.401972    | 1575.204624      | 24 |
| 6  | 776.306573  | 388.656925      | 759.280024     | 380.143650       | 758.296008     | 379.651642       | C    | 3039.353959 | 1520.180617     | 3022.327410    | 1511.667343      | 3021.343394    | 1511.175335      | 23 |
| 7  | 936.337222  | 468.672249      | 919.310673     | 460.158975       | 918.326657     | 459.666967       | C    | 2879.323310 | 1440.165293     | 2862.296761    | 1431.652018      | 2861.312745    | 1431.160010      | 22 |
| 8  | 1073.396134 | 537.201705      | 1056.369585    | 528.688431       | 1055.385569    | 528.196423       | H    | 2719.292661 | 1360.149968     | 2702.266112    | 1351.636694      | 2701.282096    | 1351.144686      | 21 |
| 9  | 1160.428162 | 580.717719      | 1143.401613    | 572.204445       | 1142.417597    | 571.712437       | S    | 2582.233749 | 1291.620512     | 2565.207200    | 1283.107238      | 2564.223184    | 1282.615230      | 20 |
| 10 | 1599.653488 | 800.330382      | 1582.626939    | 791.817108       | 1581.642923    | 791.325100       | Q    | 2495.201721 | 1248.104498     | 2478.175172    | 1239.591224      | 2477.191156    | 1239.099216      | 19 |
| 11 | 1712.737552 | 856.872414      | 1695.711003    | 848.359140       | 1694.726987    | 847.867132       | L    | 2055.976395 | 1028.491835     | 2038.949846    | 1019.978561      | 2037.965830    | 1019.486553      | 18 |
| 12 | 1841.780145 | 921.393711      | 1824.753596    | 912.880436       | 1823.769580    | 912.388428       | E    | 1942.892331 | 971.949804      | 1925.865782    | 963.436529       | 1924.881766    | 962.944521       | 17 |
| 13 | 1970.822738 | 985.915007      | 1953.796189    | 977.401733       | 1952.812173    | 976.909725       | E    | 1813.849738 | 907.428507      | 1796.823189    | 898.915233       | 1795.839173    | 898.423225       | 16 |
| 14 | 2083.906802 | 1042.457039     | 2066.880253    | 1033.943764      | 2065.896237    | 1033.451756      | L    | 1684.807145 | 842.907211      | 1667.780596    | 834.393936       | 1666.796580    | 833.901928       | 15 |
| 15 | 2220.965714 | 1110.986495     | 2203.939165    | 1102.473220      | 2202.955149    | 1101.981212      | H    | 1571.723081 | 786.365179      | 1554.696532    | 777.851904       | 1553.712516    | 777.359896       | 14 |
| 16 | 2380.996363 | 1191.001819     | 2363.969814    | 1182.488545      | 2362.985798    | 1181.996537      | C    | 1434.664169 | 717.835723      | 1417.637620    | 709.322448       | 1416.653604    | 708.830440       | 13 |
| 17 | 2452.033477 | 1226.520376     | 2435.006928    | 1218.007102      | 2434.022912    | 1217.515094      | A    | 1274.633520 | 637.820398      | 1257.606971    | 629.307124       | 1256.622955    | 628.815116       | 12 |
| 18 | 2553.081156 | 1277.044216     | 2536.054607    | 1268.530941      | 2535.070591    | 1268.038933      | T    | 1203.596406 | 602.301841      | 1186.569857    | 593.788567       | 1185.585841    | 593.296559       | 11 |
| 19 | 2610.102620 | 1305.554948     | 2593.076071    | 1297.041673      | 2592.092055    | 1296.549665      | G    | 1102.548727 | 551.778002      | 1085.522178    | 543.264727       | 1084.538162    | 542.772719       | 10 |
| 20 | 2723.186684 | 1362.096980     | 2706.160135    | 1353.583705      | 2705.176119    | 1353.091697      | I    | 1045.527263 | 523.267270      | 1028.500714    | 514.753995       | 1027.516698    | 514.261987       | 9  |
| 21 | 2810.218712 | 1405.612994     | 2793.192163    | 1397.099719      | 2792.208147    | 1396.607711      | S    | 932.443199  | 466.725238      | 915.416650     | 458.211963       | 914.432634     | 457.719955       | 8  |
| 22 | 2923.302776 | 1462.155026     | 2906.276227    | 1453.641751      | 2905.292211    | 1453.149743      | L    | 845.411171  | 423.209224      | 828.384622     | 414.695949       | 827.400606     | 414.203941       | 7  |
| 23 | 2994.339890 | 1497.673583     | 2977.313341    | 1489.160308      | 2976.329325    | 1488.668301      | A    | 732.327107  | 366.667192      | 715.300558     | 358.153917       | 714.316542     | 357.661909       | 6  |
| 24 | 3108.382817 | 1554.695047     | 3091.356268    | 1546.181772      | 3090.372252    | 1545.689764      | N    | 661.289993  | 331.148635      | 644.263444     | 322.635360       | 643.279428     | 322.143352       | 5  |
| 25 | 3237.425410 | 1619.216343     | 3220.398861    | 1610.703069      | 3219.414845    | 1610.211061      | E    | 547.247066  | 274.127171      | 530.220517     | 265.613897       | 529.236501     | 265.121889       | 4  |
| 26 | 3365.483988 | 1683.245632     | 3348.457439    | 1674.732358      | 3347.473423    | 1674.240350      | Q    | 418.204473  | 209.605874      | 401.177924     | 201.092600       | 400.193908     | 200.600592       | 3  |
| 27 | 3480.510931 | 1740.759104     | 3463.484382    | 1732.245829      | 3462.500366    | 1731.753821      | D    | 290.145895  | 145.576585      | 273.119346     | 137.063311       | 272.135330     | 136.571303       | 2  |
| 28 |             |                 |                |                  |                |                  | R    | 175.118952  | 88.063114       | 158.092403     | 79.549839        |                |                  | 1  |

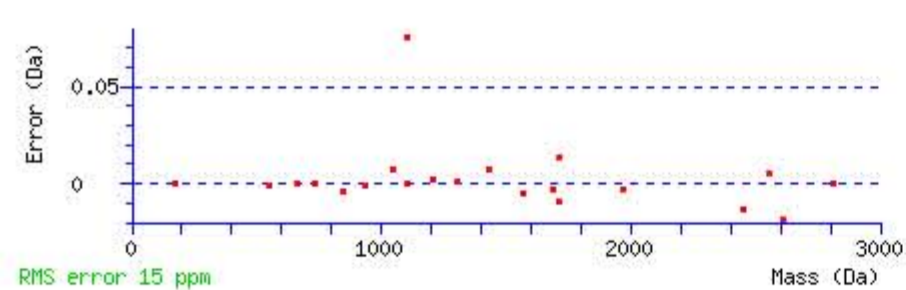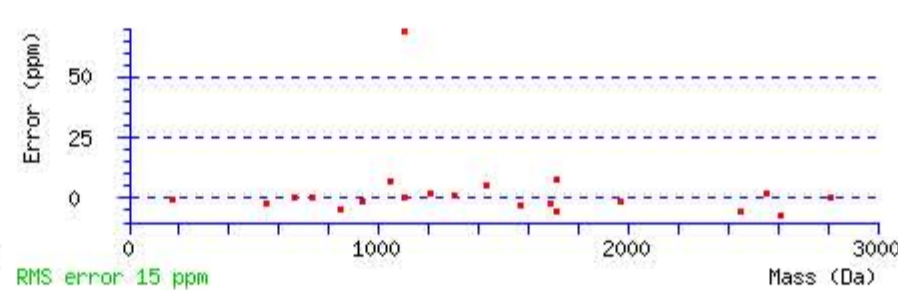

NCBI BLAST search of **MVQEQCCHSQLEELHCATGISLANEQDR**

(Parameters: blastp, nr protein database, expect=20000, no filter, PAM30)

Other BLAST [web gateways](#)

All matches to this query

| Score | $M_r(\text{calc})$ : | Delta     | Sequence                                     |
|-------|----------------------|-----------|----------------------------------------------|
| 84.5  | 3653.615311          | -0.004055 | <a href="#">MVQEQCCHSQLEELHCATGISLANEQDR</a> |
| 84.5  | 3653.615311          | -0.004055 | <a href="#">MVQEQCCHSQLEELHCATGISLANEQDR</a> |
| 84.5  | 3653.615311          | -0.004055 | <a href="#">MVQEQCCHSQLEELHCATGISLANEQDR</a> |

# MASCOT Search Results

## Peptide View

MS/MS Fragmentation of **MVQEQCCHSQLEELHCATGISLANEQDR**

Found in **FBLN1\_HUMAN**, Fibulin-1 OS=Homo sapiens GN=FBLN1 PE=1 SV=4

Match to Query 60714: 3653.621256 from(914.412590,4+) rtinseconds(2002) index(46087)

Title: Locus:1.1.1.3409.23 File:"2013-07-02 CLN FXIII 180 min 3rd F 4.wiff"

Data file C:\Program Files (x86)\Matrix Science\Mascot Daemon\mgf\9 FXIII 180 min 3rd\mascot\_daemon\_merge.mgf

Click mouse within plot area to zoom in by factor of two about that point

Or, Plot from  to  Da Full range

Label all possible matches  Label matches used for scoring

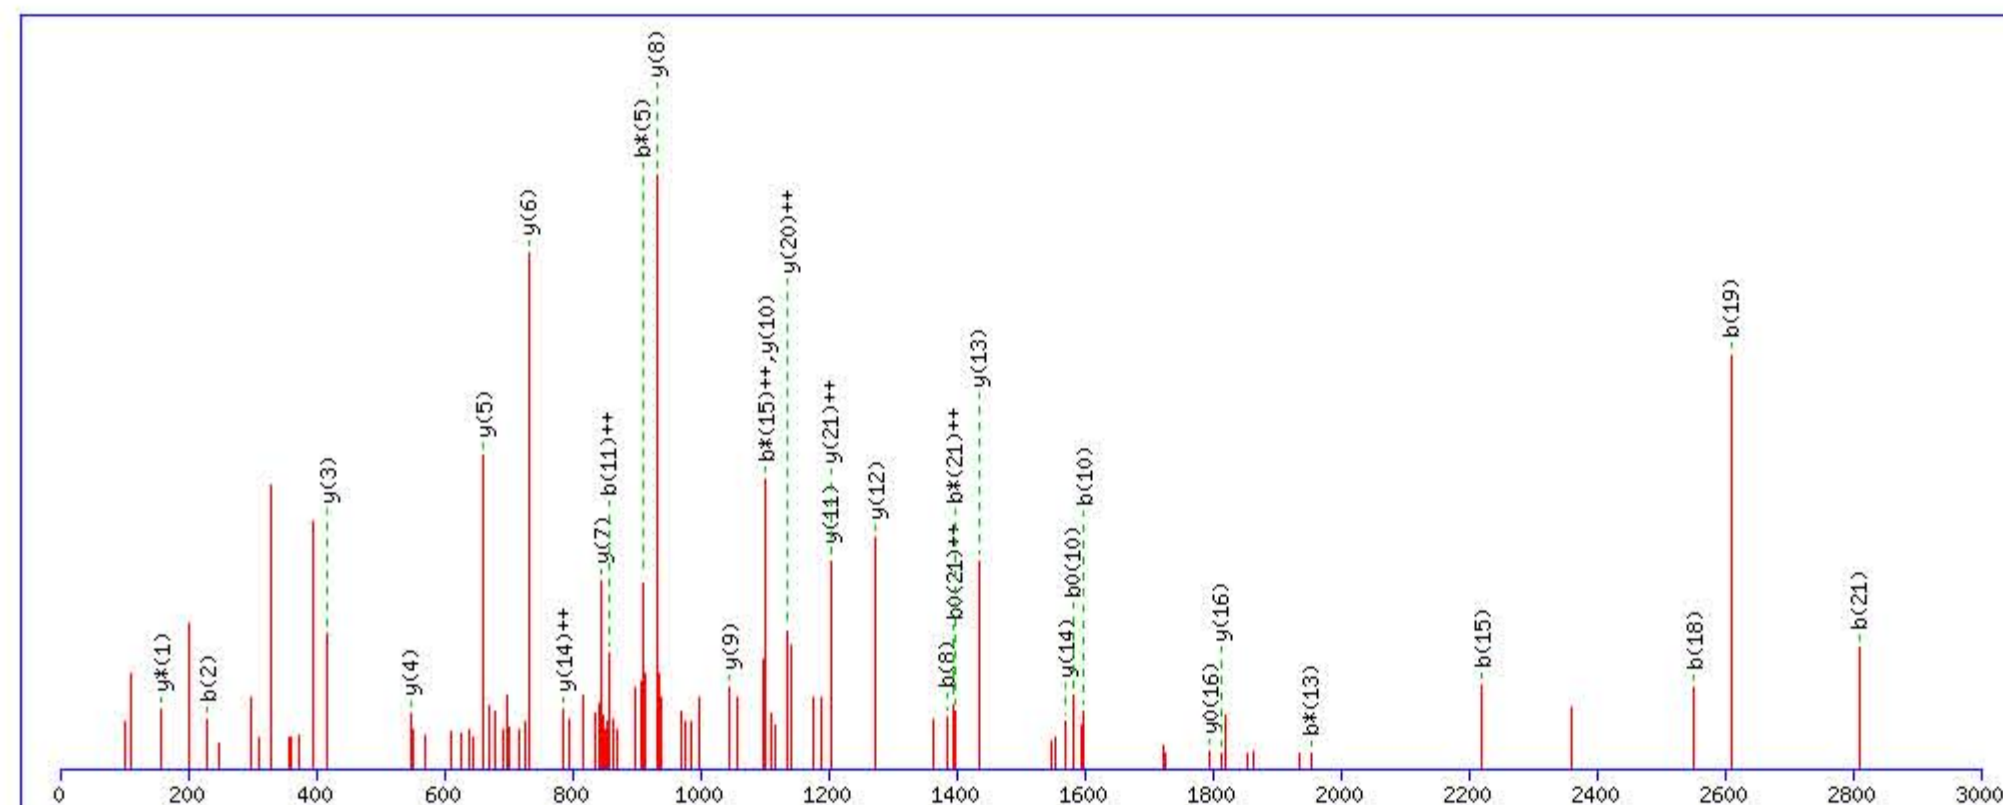

Monoisotopic mass of neutral peptide Mr(calc): 3653.615311  
Fixed modifications: Carbamidomethyl (C) (apply to specified residues or termini only)  
Variable modifications:  
Q5 : Biotin:Thermo-21345 (Q)  
Ions Score: 65 Expect: 2.5e-006  
Matches : 32/312 fragment ions using 54 most intense peaks [\(help\)](#)

| #  | b                  | b <sup>++</sup>   | b*                 | b <sup>+++</sup>   | b <sup>0</sup>     | b <sup>0++</sup>   | Seq. | y                  | y <sup>++</sup>    | y*                | y <sup>+++</sup> | y <sup>0</sup>     | y <sup>0++</sup> | #  |
|----|--------------------|-------------------|--------------------|--------------------|--------------------|--------------------|------|--------------------|--------------------|-------------------|------------------|--------------------|------------------|----|
| 1  | 132.047761         | 66.527518         |                    |                    |                    |                    | M    |                    |                    |                   |                  |                    |                  | 28 |
| 2  | <b>231.116175</b>  | 116.061725        |                    |                    |                    |                    | V    | 3523.582122        | 1762.294699        | 3506.555573       | 1753.781424      | 3505.571557        | 1753.289416      | 27 |
| 3  | 359.174753         | 180.091015        | 342.148204         | 171.577740         |                    |                    | Q    | 3424.513708        | 1712.760492        | 3407.487159       | 1704.247217      | 3406.503143        | 1703.755209      | 26 |
| 4  | 488.217346         | 244.612311        | 471.190797         | 236.099037         | 470.206781         | 235.607029         | E    | 3296.455130        | 1648.731203        | 3279.428581       | 1640.217928      | 3278.444565        | 1639.725920      | 25 |
| 5  | 927.442672         | 464.224974        | <b>910.416123</b>  | 455.711700         | 909.432107         | 455.219692         | Q    | 3167.412537        | 1584.209906        | 3150.385988       | 1575.696632      | 3149.401972        | 1575.204624      | 24 |
| 6  | 1087.473321        | 544.240298        | 1070.446772        | 535.727024         | 1069.462756        | 535.235016         | C    | 2728.187211        | 1364.597243        | 2711.160662       | 1356.083969      | 2710.176646        | 1355.591961      | 23 |
| 7  | 1247.503970        | 624.255623        | 1230.477421        | 615.742349         | 1229.493405        | 615.250340         | C    | 2568.156562        | 1284.581919        | 2551.130013       | 1276.068644      | 2550.145997        | 1275.576636      | 22 |
| 8  | <b>1384.562882</b> | 692.785079        | 1367.536333        | 684.271805         | 1366.552317        | 683.779796         | H    | 2408.125913        | <b>1204.566594</b> | 2391.099364       | 1196.053320      | 2390.115348        | 1195.561312      | 21 |
| 9  | 1471.594910        | 736.301093        | 1454.568361        | 727.787819         | 1453.584345        | 727.295811         | S    | 2271.067001        | <b>1136.037138</b> | 2254.040452       | 1127.523864      | 2253.056436        | 1127.031856      | 20 |
| 10 | <b>1599.653488</b> | 800.330382        | 1582.626939        | 791.817108         | <b>1581.642923</b> | 791.325100         | Q    | 2184.034973        | 1092.521124        | 2167.008424       | 1084.007850      | 2166.024408        | 1083.515842      | 19 |
| 11 | 1712.737552        | <b>856.872414</b> | 1695.711003        | 848.359140         | 1694.726987        | 847.867132         | L    | 2055.976395        | 1028.491835        | 2038.949846       | 1019.978561      | 2037.965830        | 1019.486553      | 18 |
| 12 | 1841.780145        | 921.393711        | 1824.753596        | 912.880436         | 1823.769580        | 912.388428         | E    | 1942.892331        | 971.949804         | 1925.865782       | 963.436529       | 1924.881766        | 962.944521       | 17 |
| 13 | 1970.822738        | 985.915007        | <b>1953.796189</b> | 977.401733         | 1952.812173        | 976.909725         | E    | <b>1813.849738</b> | 907.428507         | 1796.823189       | 898.915233       | <b>1795.839173</b> | 898.423225       | 16 |
| 14 | 2083.906802        | 1042.457039       | 2066.880253        | 1033.943764        | 2065.896237        | 1033.451756        | L    | 1684.807145        | 842.907211         | 1667.780596       | 834.393936       | 1666.796580        | 833.901928       | 15 |
| 15 | <b>2220.965714</b> | 1110.986495       | 2203.939165        | <b>1102.473220</b> | 2202.955149        | 1101.981212        | H    | <b>1571.723081</b> | <b>786.365179</b>  | 1554.696532       | 777.851904       | 1553.712516        | 777.359896       | 14 |
| 16 | 2380.996363        | 1191.001819       | 2363.969814        | 1182.488545        | 2362.985798        | 1181.996537        | C    | <b>1434.664169</b> | 717.835723         | 1417.637620       | 709.322448       | 1416.653604        | 708.830440       | 13 |
| 17 | 2452.033477        | 1226.520376       | 2435.006928        | 1218.007102        | 2434.022912        | 1217.515094        | A    | <b>1274.633520</b> | 637.820398         | 1257.606971       | 629.307124       | 1256.622955        | 628.815116       | 12 |
| 18 | <b>2553.081156</b> | 1277.044216       | 2536.054607        | 1268.530941        | 2535.070591        | 1268.038933        | T    | <b>1203.596406</b> | 602.301841         | 1186.569857       | 593.788567       | 1185.585841        | 593.296559       | 11 |
| 19 | <b>2610.102620</b> | 1305.554948       | 2593.076071        | 1297.041673        | 2592.092055        | 1296.549665        | G    | <b>1102.548727</b> | 551.778002         | 1085.522178       | 543.264727       | 1084.538162        | 542.772719       | 10 |
| 20 | 2723.186684        | 1362.096980       | 2706.160135        | 1353.583705        | 2705.176119        | 1353.091697        | I    | <b>1045.527263</b> | 523.267270         | 1028.500714       | 514.753995       | 1027.516698        | 514.261987       | 9  |
| 21 | <b>2810.218712</b> | 1405.612994       | 2793.192163        | <b>1397.099719</b> | 2792.208147        | <b>1396.607711</b> | S    | <b>932.443199</b>  | 466.725238         | 915.416650        | 458.211963       | 914.432634         | 457.719955       | 8  |
| 22 | 2923.302776        | 1462.155026       | 2906.276227        | 1453.641751        | 2905.292211        | 1453.149743        | L    | <b>845.411171</b>  | 423.209224         | 828.384622        | 414.695949       | 827.400606         | 414.203941       | 7  |
| 23 | 2994.339890        | 1497.673583       | 2977.313341        | 1489.160308        | 2976.329325        | 1488.668301        | A    | <b>732.327107</b>  | 366.667192         | 715.300558        | 358.153917       | 714.316542         | 357.661909       | 6  |
| 24 | 3108.382817        | 1554.695047       | 3091.356268        | 1546.181772        | 3090.372252        | 1545.689764        | N    | <b>661.289993</b>  | 331.148635         | 644.263444        | 322.635360       | 643.279428         | 322.143352       | 5  |
| 25 | 3237.425410        | 1619.216343       | 3220.398861        | 1610.703069        | 3219.414845        | 1610.211061        | E    | <b>547.247066</b>  | 274.127171         | 530.220517        | 265.613897       | 529.236501         | 265.121889       | 4  |
| 26 | 3365.483988        | 1683.245632       | 3348.457439        | 1674.732358        | 3347.473423        | 1674.240350        | Q    | <b>418.204473</b>  | 209.605874         | 401.177924        | 201.092600       | 400.193908         | 200.600592       | 3  |
| 27 | 3480.510931        | 1740.759104       | 3463.484382        | 1732.245829        | 3462.500366        | 1731.753821        | D    | 290.145895         | 145.576585         | 273.119346        | 137.063311       | 272.135330         | 136.571303       | 2  |
| 28 |                    |                   |                    |                    |                    |                    | R    | 175.118952         | 88.063114          | <b>158.092403</b> | 79.549839        |                    |                  | 1  |

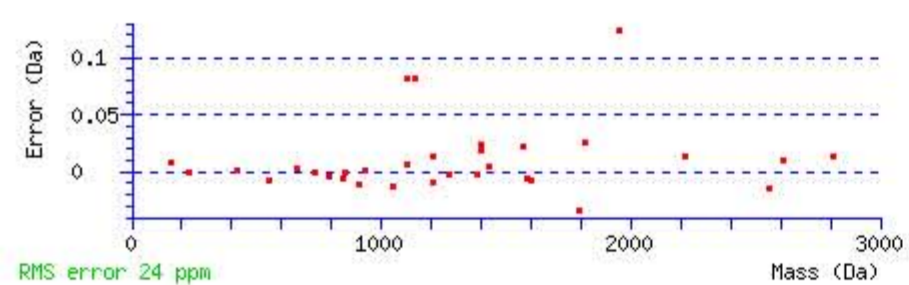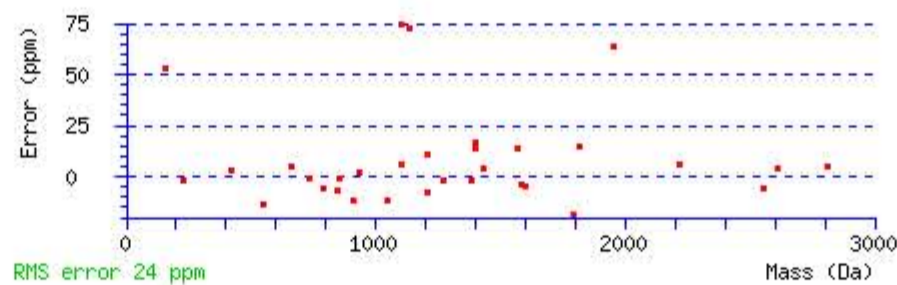

NCBI BLAST search of **MVQEQCCHSQLEELHCATGISLANEQDR**

(Parameters: blastp, nr protein database, expect=20000, no filter, PAM30)

Other BLAST [web gateways](#)

All matches to this query

| Score | Mr(calc):   | Delta    | Sequence                                     |
|-------|-------------|----------|----------------------------------------------|
| 64.7  | 3653.615311 | 0.005945 | <a href="#">MVQEQCCHSQLEELHCATGISLANEQDR</a> |
| 64.7  | 3653.615311 | 0.005945 | <a href="#">MVQEQCCHSQLEELHCATGISLANEQDR</a> |
| 56.2  | 3653.615311 | 0.005945 | <a href="#">MVQEQCCHSQLEELHCATGISLANEQDR</a> |

# MASCOT Search Results

## Peptide View

MS/MS Fragmentation of **GYQLSDVDGVTCEIDICALPTGGHICSYR**

Found in **FBLN1\_HUMAN**, Fibulin-1 OS=Homo sapiens GN=FBLN1 PE=1 SV=4

Match to Query 60925: 3697.607656 from(925.409190,4+) rtinseconds(2306) index(33637)

Title: Locus:1.1.1.3466.12 File:"2013-07-02 CLN FXIII 180 min 3rd F 3.wiff"

Data file C:\Program Files (x86)\Matrix Science\Mascot Daemon\mgf\9 FXIII 180 min 3rd\mascot\_daemon\_merge.mgf

Click mouse within plot area to zoom in by factor of two about that point

Or, Plot from  to  Da

Label all possible matches  Label matches used for scoring

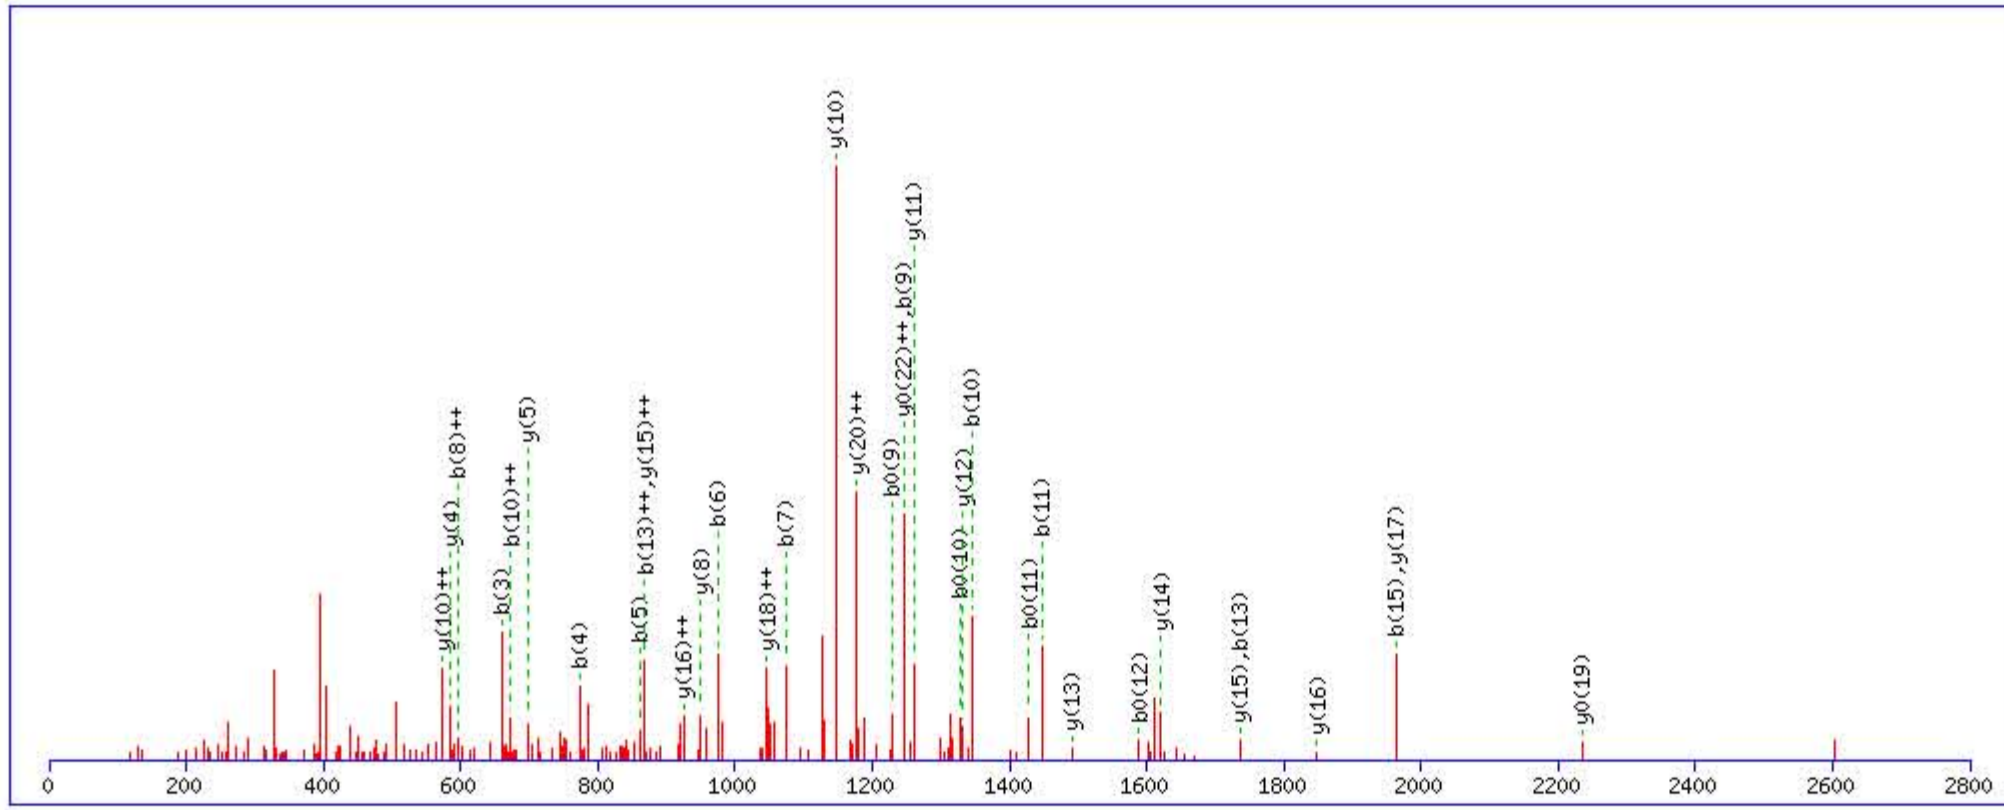

Monoisotopic mass of neutral peptide Mr(calc): 3697.615738

Fixed modifications: Carbamidomethyl (C) (apply to specified residues or termini only)

Variable modifications:

Q3 : Biotin:Thermo-21345 (Q)

Ions Score: 75 Expect: 1.2e-007

Matches : 35/392 fragment ions using 54 most intense peaks [\(help\)](#)

| #  | b                  | b <sup>++</sup>   | b <sup>*</sup> | b <sup>*++</sup> | b <sup>0</sup>     | b <sup>0++</sup> | Seq. | y                  | y <sup>++</sup>    | y <sup>*</sup> | y <sup>*++</sup> | y <sup>0</sup>     | y <sup>0++</sup>   | #  |
|----|--------------------|-------------------|----------------|------------------|--------------------|------------------|------|--------------------|--------------------|----------------|------------------|--------------------|--------------------|----|
| 1  | 58.028740          | 29.518008         |                |                  |                    |                  | G    |                    |                    |                |                  |                    |                    | 30 |
| 2  | 221.092069         | 111.049673        |                |                  |                    |                  | Y    | 3641.601521        | 1821.304398        | 3624.574972    | 1812.791124      | 3623.590956        | 1812.299116        | 29 |
| 3  | <b>660.317395</b>  | 330.662336        | 643.290846     | 322.149061       |                    |                  | Q    | 3478.538192        | 1739.772734        | 3461.511643    | 1731.259459      | 3460.527627        | 1730.767451        | 28 |
| 4  | <b>773.401459</b>  | 387.204368        | 756.374910     | 378.691093       |                    |                  | L    | 3039.312866        | 1520.160071        | 3022.286317    | 1511.646796      | 3021.302301        | 1511.154788        | 27 |
| 5  | <b>860.433487</b>  | 430.720382        | 843.406938     | 422.207107       | 842.422922         | 421.715099       | S    | 2926.228802        | 1463.618039        | 2909.202253    | 1455.104764      | 2908.218237        | 1454.612756        | 26 |
| 6  | <b>975.460430</b>  | 488.233853        | 958.433881     | 479.720578       | 957.449865         | 479.228570       | D    | 2839.196774        | 1420.102025        | 2822.170225    | 1411.588750      | 2821.186209        | 1411.096742        | 25 |
| 7  | <b>1074.528844</b> | 537.768060        | 1057.502295    | 529.254786       | 1056.518279        | 528.762777       | V    | 2724.169831        | 1362.588553        | 2707.143282    | 1354.075279      | 2706.159266        | 1353.583271        | 24 |
| 8  | 1189.555787        | <b>595.281532</b> | 1172.529238    | 586.768257       | 1171.545222        | 586.276249       | D    | 2625.101417        | 1313.054346        | 2608.074868    | 1304.541072      | 2607.090852        | 1304.049064        | 23 |
| 9  | <b>1246.577251</b> | 623.792263        | 1229.550702    | 615.278989       | <b>1228.566686</b> | 614.786981       | G    | 2510.074474        | 1255.540875        | 2493.047925    | 1247.027600      | 2492.063909        | <b>1246.535592</b> | 22 |
| 10 | <b>1345.645665</b> | <b>673.326471</b> | 1328.619116    | 664.813196       | <b>1327.635100</b> | 664.321188       | V    | 2453.053010        | 1227.030143        | 2436.026461    | 1218.516868      | 2435.042445        | 1218.024860        | 21 |
| 11 | <b>1446.693344</b> | 723.850310        | 1429.666795    | 715.337036       | <b>1428.682779</b> | 714.845028       | T    | 2353.984596        | <b>1177.495936</b> | 2336.958047    | 1168.982661      | 2335.974031        | 1168.490653        | 20 |
| 12 | 1606.723993        | 803.865635        | 1589.697444    | 795.352360       | <b>1588.713428</b> | 794.860352       | C    | 2252.936917        | 1126.972096        | 2235.910368    | 1118.458822      | <b>2234.926352</b> | 1117.966814        | 19 |
| 13 | <b>1735.766586</b> | <b>868.386931</b> | 1718.740037    | 859.873657       | 1717.756021        | 859.381648       | E    | 2092.906268        | <b>1046.956772</b> | 2075.879719    | 1038.443497      | 2074.895703        | 1037.951489        | 18 |
| 14 | 1850.793529        | 925.900403        | 1833.766980    | 917.387128       | 1832.782964        | 916.895120       | D    | <b>1963.863675</b> | 982.435475         | 1946.837126    | 973.922201       | 1945.853110        | 973.430193         | 17 |
| 15 | <b>1963.877593</b> | 982.442434        | 1946.851044    | 973.929160       | 1945.867028        | 973.437152       | I    | <b>1848.836732</b> | <b>924.922004</b>  | 1831.810183    | 916.408729       | 1830.826167        | 915.916721         | 16 |
| 16 | 2078.904536        | 1039.955906       | 2061.877987    | 1031.442631      | 2060.893971        | 1030.950623      | D    | <b>1735.752668</b> | <b>868.379972</b>  | 1718.726119    | 859.866697       | 1717.742103        | 859.374689         | 15 |
| 17 | 2207.947129        | 1104.477202       | 2190.920580    | 1095.963928      | 2189.936564        | 1095.471920      | E    | <b>1620.725725</b> | 810.866501         | 1603.699176    | 802.353226       | 1602.715160        | 801.861218         | 14 |
| 18 | 2367.977778        | 1184.492527       | 2350.951229    | 1175.979252      | 2349.967213        | 1175.487244      | C    | <b>1491.683132</b> | 746.345204         | 1474.656583    | 737.831930       | 1473.672567        | 737.339921         | 13 |
| 19 | 2439.014892        | 1220.011084       | 2421.988343    | 1211.497809      | 2421.004327        | 1211.005801      | A    | <b>1331.652483</b> | 666.329880         | 1314.625934    | 657.816605       | 1313.641918        | 657.324597         | 12 |
| 20 | 2552.098956        | 1276.553116       | 2535.072407    | 1268.039841      | 2534.088391        | 1267.547833      | L    | <b>1260.615369</b> | 630.811322         | 1243.588820    | 622.298048       | 1242.604804        | 621.806040         | 11 |
| 21 | 2649.151720        | 1325.079498       | 2632.125171    | 1316.566223      | 2631.141155        | 1316.074215      | P    | <b>1147.531305</b> | <b>574.269290</b>  | 1130.504756    | 565.756016       | 1129.520740        | 565.264008         | 10 |
| 22 | 2750.199399        | 1375.603337       | 2733.172850    | 1367.090063      | 2732.188834        | 1366.598055      | T    | 1050.478541        | 525.742908         | 1033.451992    | 517.229634       | 1032.467976        | 516.737626         | 9  |
| 23 | 2807.220863        | 1404.114069       | 2790.194314    | 1395.600795      | 2789.210298        | 1395.108787      | G    | <b>949.430862</b>  | 475.219069         | 932.404313     | 466.705794       | 931.420297         | 466.213786         | 8  |
| 24 | 2864.242327        | 1432.624801       | 2847.215778    | 1424.111527      | 2846.231762        | 1423.619519      | G    | 892.409398         | 446.708337         | 875.382849     | 438.195063       | 874.398833         | 437.703055         | 7  |
| 25 | 3001.301239        | 1501.154257       | 2984.274690    | 1492.640983      | 2983.290674        | 1492.148975      | H    | 835.387934         | 418.197605         | 818.361385     | 409.684331       | 817.377369         | 409.192323         | 6  |
| 26 | 3114.385303        | 1557.696289       | 3097.358754    | 1549.183015      | 3096.374738        | 1548.691007      | I    | <b>698.329022</b>  | 349.668149         | 681.302473     | 341.154875       | 680.318457         | 340.662867         | 5  |
| 27 | 3274.415952        | 1637.711614       | 3257.389403    | 1629.198339      | 3256.405387        | 1628.706331      | C    | <b>585.244958</b>  | 293.126117         | 568.218409     | 284.612843       | 567.234393         | 284.120835         | 4  |
| 28 | 3361.447980        | 1681.227628       | 3344.421431    | 1672.714353      | 3343.437415        | 1672.222345      | S    | 425.214309         | 213.110793         | 408.187760     | 204.597518       | 407.203744         | 204.105510         | 3  |
| 29 | 3524.511309        | 1762.759292       | 3507.484760    | 1754.246018      | 3506.500744        | 1753.754010      | Y    | 338.182281         | 169.594778         | 321.155732     | 161.081504       |                    |                    | 2  |
| 30 |                    |                   |                |                  |                    |                  | R    | 175.118952         | 88.063114          | 158.092403     | 79.549839        |                    |                    | 1  |

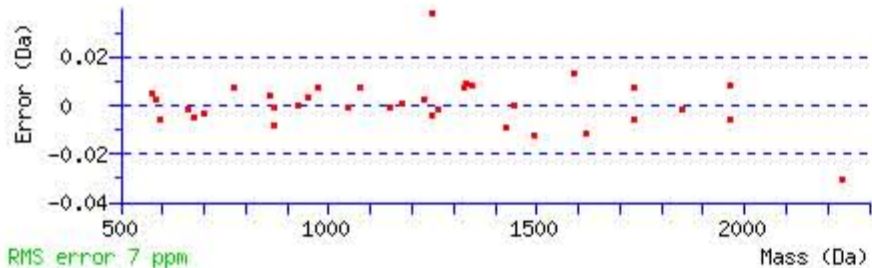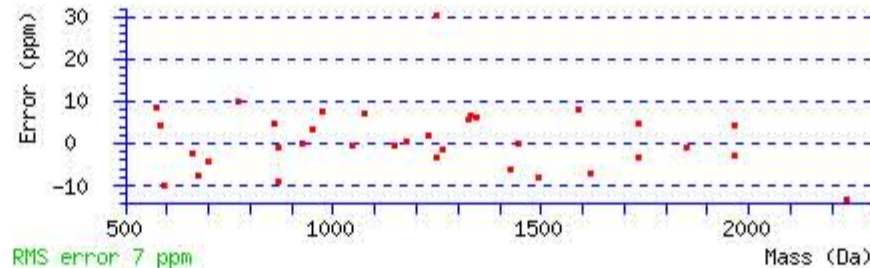

NCBI BLAST search of **GYQLSDVDGVTCEIDICALPTGGHICSYR**

(Parameters: blastp, nr protein database, expect=20000, no filter, PAM30)

Other BLAST [web gateways](#)

All matches to this query

| Score | Mr(calc):   | Delta     | Sequence                                      |
|-------|-------------|-----------|-----------------------------------------------|
| 74.9  | 3697.615738 | -0.008082 | <a href="#">GYQLSDVDGVTCEIDICALPTGGHICSYR</a> |

Mascot: <http://www.matrixscience.com/>

**Mascot Search Results**

**Peptide View**

MS/MS Fragmentation of **MVQEQCCHSQLEELHCATGISLANEQDR**  
 Found in **FBLN1\_HUMAN**, Fibulin-1 OS=Homo sapiens GN=FBLN1 PE=1 SV=4

Match to Query 62116: 3964.776416 from(992.201380,4+) rtinseconds(2223) index(33171)  
 Title: Locus:1.1.1.3437.25 File:"2013-07-02 CLN FXIII 180 min 3rd F 3.wiff"  
 Data file C:\Program Files (x86)\Matrix Science\Mascot Daemon\mgf9 FXIII 180 min 3rd\mascot\_daemon\_merge.mgf

Click mouse within plot area to zoom in by factor of two about that point  
 Or, Plot from 0 to 3200 Da Full range  
 Label all possible matches  Label matches used for scoring

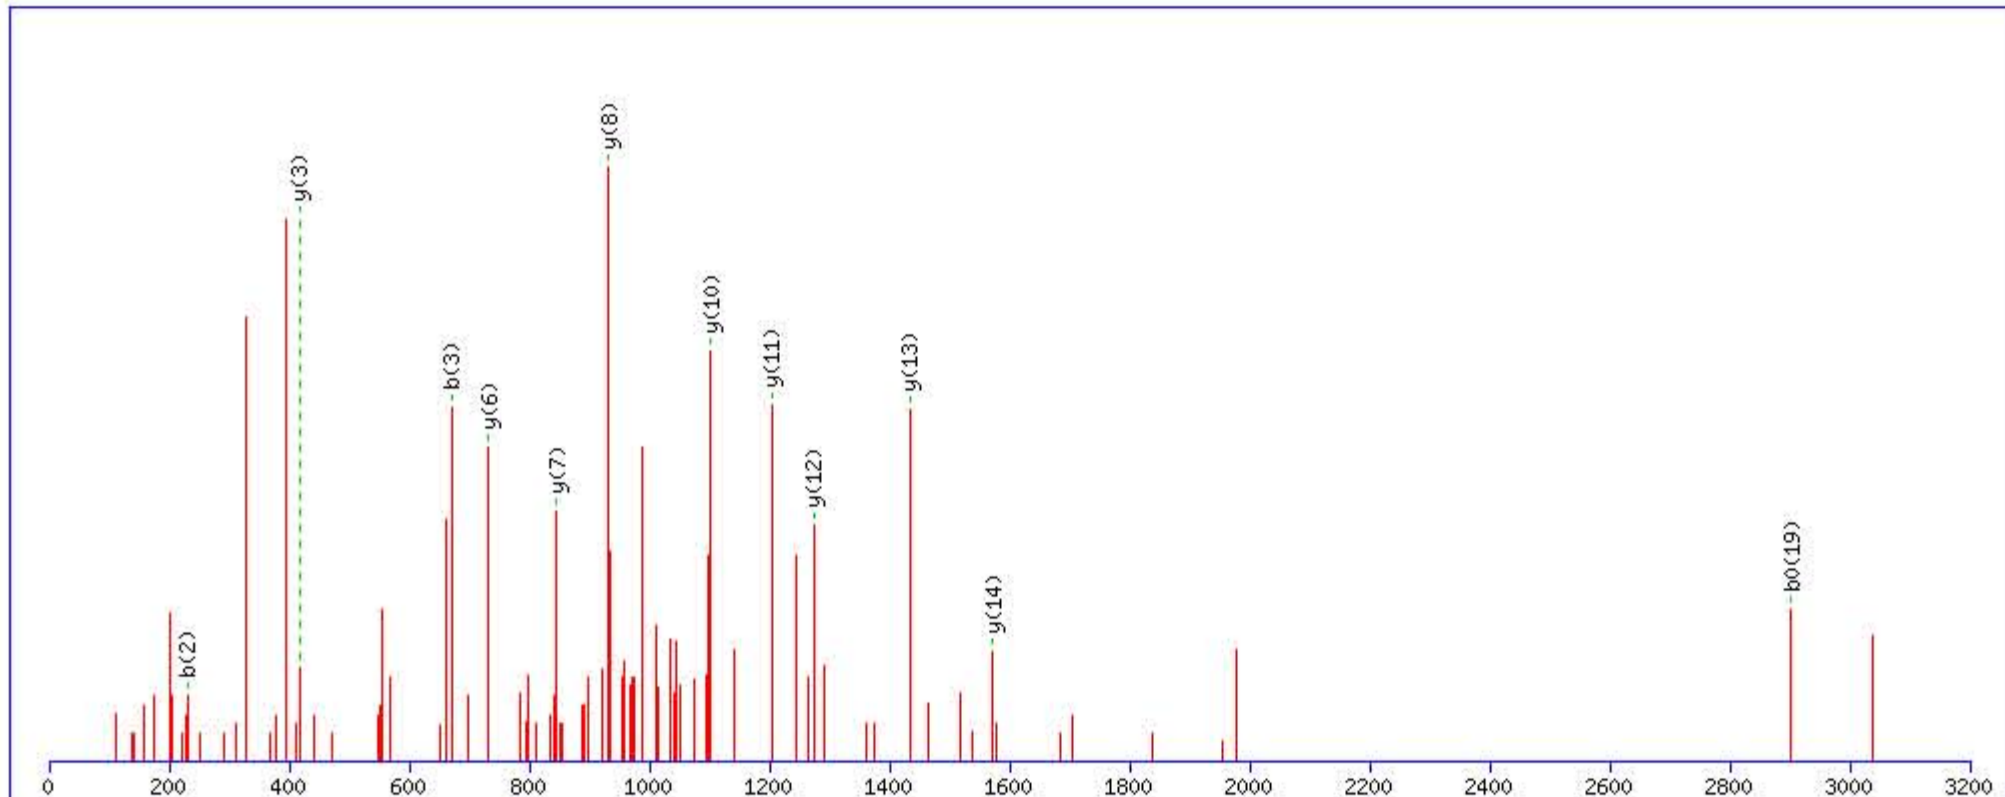

**Monoisotopic mass of neutral peptide Mr(calc): 3964.782059**  
**Fixed modifications:** Carbamidomethyl (C) (apply to specified residues or termini only)  
**Variable modifications:**  
 Q3 : Biotin:Thermo-21345 (Q)  
 Q10 : Biotin:Thermo-21345 (Q)  
**Ions Score: 46 Expect: 5e-005**  
**Matches : 12/312 fragment ions using 20 most intense peaks (help)**

| #  | b                 | b <sup>++</sup> | b*          | b <sup>+++</sup> | b <sup>0</sup>     | b <sup>0++</sup> | Seq. | y                  | y <sup>++</sup> | y*          | y <sup>+++</sup> | y <sup>0</sup> | y <sup>0++</sup> | #  |
|----|-------------------|-----------------|-------------|------------------|--------------------|------------------|------|--------------------|-----------------|-------------|------------------|----------------|------------------|----|
| 1  | 132.047761        | 66.527518       |             |                  |                    |                  | M    |                    |                 |             |                  |                |                  | 28 |
| 2  | <b>231.116175</b> | 116.061725      |             |                  |                    |                  | V    | 3834.748870        | 1917.878073     | 3817.722321 | 1909.364798      | 3816.738305    | 1908.872790      | 27 |
| 3  | <b>670.341501</b> | 335.674389      | 653.314952  | 327.161114       |                    |                  | Q    | 3735.680456        | 1868.343866     | 3718.653907 | 1859.830591      | 3717.669891    | 1859.338583      | 26 |
| 4  | 799.384094        | 400.195685      | 782.357545  | 391.682411       | 781.373529         | 391.190403       | E    | 3296.455130        | 1648.731203     | 3279.428581 | 1640.217928      | 3278.444565    | 1639.725920      | 25 |
| 5  | 927.442672        | 464.224974      | 910.416123  | 455.711700       | 909.432107         | 455.219692       | Q    | 3167.412537        | 1584.209906     | 3150.385988 | 1575.696632      | 3149.401972    | 1575.204624      | 24 |
| 6  | 1087.473321       | 544.240299      | 1070.446772 | 535.727024       | 1069.462756        | 535.235016       | C    | 3039.353959        | 1520.180617     | 3022.327410 | 1511.667343      | 3021.343394    | 1511.175335      | 23 |
| 7  | 1247.503970       | 624.255623      | 1230.477421 | 615.742349       | 1229.493405        | 615.250341       | C    | 2879.323310        | 1440.165293     | 2862.296761 | 1431.652018      | 2861.312745    | 1431.160010      | 22 |
| 8  | 1384.562882       | 692.785079      | 1367.536333 | 684.271805       | 1366.552317        | 683.779797       | H    | 2719.292661        | 1360.149968     | 2702.266112 | 1351.636694      | 2701.282096    | 1351.144686      | 21 |
| 9  | 1471.594910       | 736.301093      | 1454.568361 | 727.787819       | 1453.584345        | 727.295811       | S    | 2582.233749        | 1291.620512     | 2565.207200 | 1283.107238      | 2564.223184    | 1282.615230      | 20 |
| 10 | 1910.820236       | 955.913756      | 1893.793687 | 947.400482       | 1892.809671        | 946.908474       | Q    | 2495.201721        | 1248.104498     | 2478.175172 | 1239.591224      | 2477.191156    | 1239.099216      | 19 |
| 11 | 2023.904300       | 1012.455788     | 2006.877751 | 1003.942514      | 2005.893735        | 1003.450506      | L    | 2055.976395        | 1028.491835     | 2038.949846 | 1019.978561      | 2037.965830    | 1019.486553      | 18 |
| 12 | 2152.946893       | 1076.977084     | 2135.920344 | 1068.463810      | 2134.936328        | 1067.971802      | E    | 1942.892331        | 971.949804      | 1925.865782 | 963.436529       | 1924.881766    | 962.944521       | 17 |
| 13 | 2281.989486       | 1141.498381     | 2264.962937 | 1132.985106      | 2263.978921        | 1132.493098      | E    | 1813.849738        | 907.428507      | 1796.823189 | 898.915233       | 1795.839173    | 898.423225       | 16 |
| 14 | 2395.073550       | 1198.040413     | 2378.047001 | 1189.527138      | 2377.062985        | 1189.035130      | L    | 1684.807145        | 842.907211      | 1667.780596 | 834.393936       | 1666.796580    | 833.901928       | 15 |
| 15 | 2532.132462       | 1266.569869     | 2515.105913 | 1258.056594      | 2514.121897        | 1257.564586      | H    | <b>1571.723081</b> | 786.365179      | 1554.696532 | 777.851904       | 1553.712516    | 777.359896       | 14 |
| 16 | 2692.163111       | 1346.585193     | 2675.136562 | 1338.071919      | 2674.152546        | 1337.579911      | C    | <b>1434.664169</b> | 717.835723      | 1417.637620 | 709.322448       | 1416.653604    | 708.830440       | 13 |
| 17 | 2763.200225       | 1382.103750     | 2746.173676 | 1373.590476      | 2745.189660        | 1373.098468      | A    | <b>1274.633520</b> | 637.820398      | 1257.606971 | 629.307124       | 1256.622955    | 628.815116       | 12 |
| 18 | 2864.247904       | 1432.627590     | 2847.221355 | 1424.114315      | 2846.237339        | 1423.622307      | T    | <b>1203.596406</b> | 602.301841      | 1186.569857 | 593.788567       | 1185.585841    | 593.296559       | 11 |
| 19 | 2921.269368       | 1461.138322     | 2904.242819 | 1452.625047      | <b>2903.258803</b> | 1452.133039      | G    | <b>1102.548727</b> | 551.778002      | 1085.522178 | 543.264727       | 1084.538162    | 542.772719       | 10 |
| 20 | 3034.353432       | 1517.680354     | 3017.326883 | 1509.167079      | 3016.342867        | 1508.675071      | I    | 1045.527263        | 523.267270      | 1028.500714 | 514.753995       | 1027.516698    | 514.261987       | 9  |
| 21 | 3121.385460       | 1561.196368     | 3104.358911 | 1552.683093      | 3103.374895        | 1552.191085      | S    | <b>932.443199</b>  | 466.725238      | 915.416650  | 458.211963       | 914.432634     | 457.719955       | 8  |
| 22 | 3234.469524       | 1617.738400     | 3217.442975 | 1609.225125      | 3216.458959        | 1608.733117      | L    | <b>845.411171</b>  | 423.209224      | 828.384622  | 414.695949       | 827.400606     | 414.203941       | 7  |
| 23 | 3305.506638       | 1653.256957     | 3288.480089 | 1644.743683      | 3287.496073        | 1644.251675      | A    | <b>732.327107</b>  | 366.667192      | 715.300558  | 358.153917       | 714.316542     | 357.661909       | 6  |
| 24 | 3419.549565       | 1710.278421     | 3402.523016 | 1701.765146      | 3401.539000        | 1701.273138      | N    | 661.289993         | 331.148635      | 644.263444  | 322.635360       | 643.279428     | 322.143352       | 5  |
| 25 | 3548.592158       | 1774.799717     | 3531.565609 | 1766.286443      | 3530.581593        | 1765.794435      | E    | 547.247066         | 274.127171      | 530.220517  | 265.613897       | 529.236501     | 265.121889       | 4  |
| 26 | 3676.650736       | 1838.829006     | 3659.624187 | 1830.315732      | 3658.640171        | 1829.823724      | Q    | <b>418.204473</b>  | 209.605874      | 401.177924  | 201.092600       | 400.193908     | 200.600592       | 3  |
| 27 | 3791.677679       | 1896.342478     | 3774.651130 | 1887.829203      | 3773.667114        | 1887.337195      | D    | 290.145895         | 145.576585      | 273.119346  | 137.063311       | 272.135330     | 136.571303       | 2  |
| 28 |                   |                 |             |                  |                    |                  | R    | 175.118952         | 88.063114       | 158.092403  | 79.549839        |                |                  | 1  |

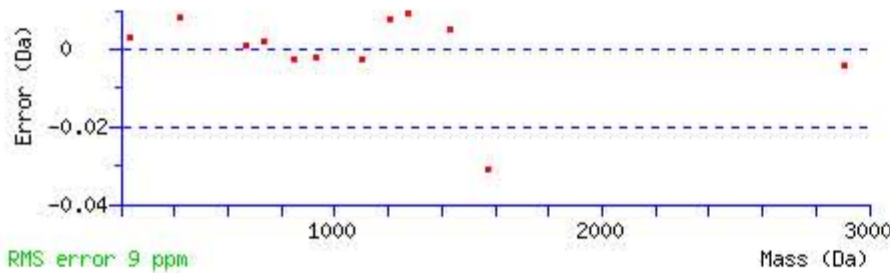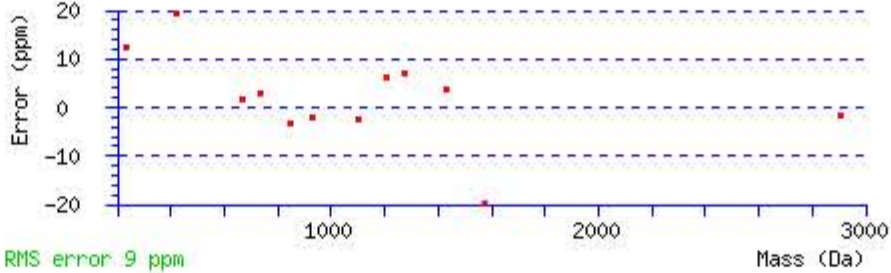

NCBI BLAST search of **MVQEQCCHSQLEELHCATGISLANEQDR**  
 (Parameters: blastp, nr protein database, expect=20000, no filter, PAM30)  
 Other BLAST [web gateways](#)

**All matches to this query**

| Score | Mr(calc):   | Delta     | Sequence                                                   |
|-------|-------------|-----------|------------------------------------------------------------|
| 46.2  | 3964.782059 | -0.005643 | <a href="#">MVQEQCCHSQLEELHCATGISLANEQDR</a>               |
| 46.2  | 3964.782059 | -0.005643 | <a href="#">MVQEQCCHSQLEELHCATGISLANEQDR</a>               |
| 37.8  | 3964.782059 | -0.005643 | <a href="#">MVQEQCCHSQLEELHCATGISLANEQDR</a>               |
| 0.4   | 3964.786865 | -0.010449 | <a href="#">SSSDSSYMSGSPGGSPGSGSAEKPSSDVIDISTHSPSLPLAR</a> |

# {MATRIX} {SCIENCE} Mascot Search Results

## Peptide View

MS/MS Fragmentation of **MVQEQCCHSQLEELHCATGISLANEQDR**  
 Found in **FBLN1\_HUMAN**, Fibulin-1 OS=Homo sapiens GN=FBLN1 PE=1 SV=4

Match to Query 62118: 3964.781976 from(992.202770,4+) rtinseconds(2151) index(32746)  
 Title: Locus:1.1.1.3412.19 File:"2013-07-02 CLN FXIII 180 min 3rd F 3.wiff"  
 Data file C:\Program Files (x86)\Matrix Science\Mascot Daemon\mgf9 FXIII 180 min 3rd\mascot\_daemon\_merge.mgf

Click mouse within plot area to zoom in by factor of two about that point

Or, Plot from  to  Da

Label all possible matches  Label matches used for scoring

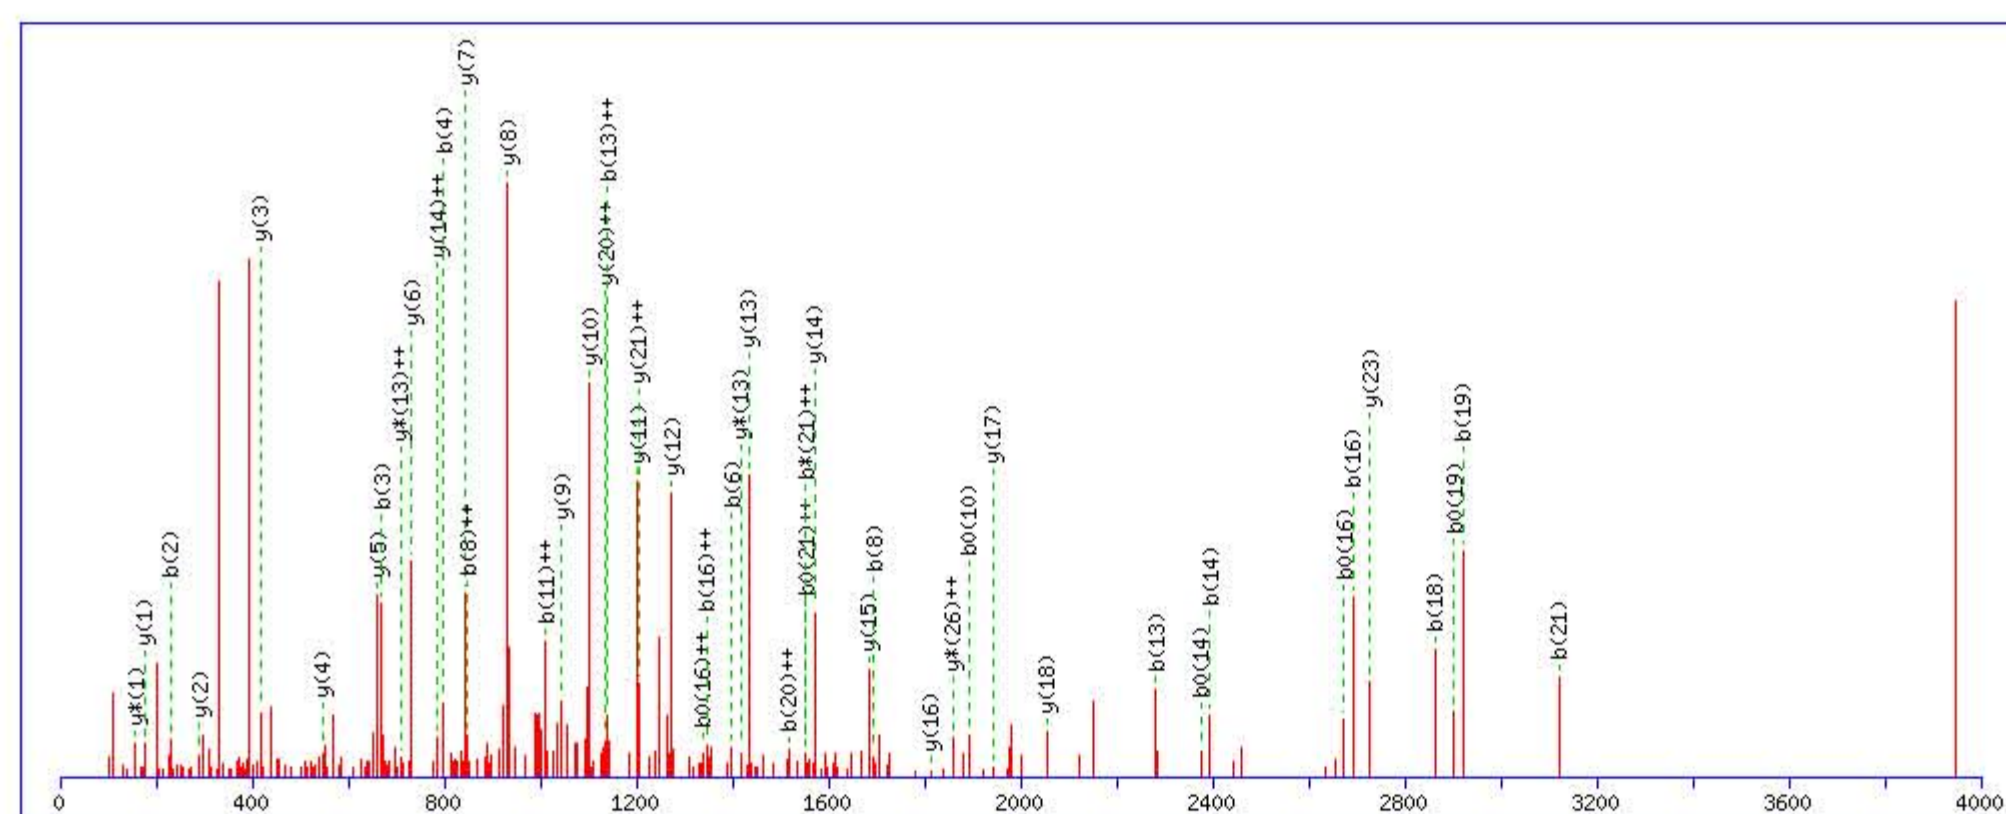

Monoisotopic mass of neutral peptide  $M_r(\text{calc})$ : 3964.782059  
 Fixed modifications: Carbamidomethyl (C) (apply to specified residues or termini only)  
 Variable modifications:  
 Q3 : Biotin:Thermo-21345 (Q)  
 Q5 : Biotin:Thermo-21345 (Q)  
 Ions Score: 81 Expect: 7.6e-008  
 Matches : 49/312 fragment ions using 115 most intense peaks [\(help\)](#)

| #  | b                  | b <sup>++</sup>    | b <sup>*</sup> | b <sup>*++</sup>   | b <sup>0</sup>     | b <sup>0++</sup>   | Seq.     | y                  | y <sup>++</sup>    | y <sup>*</sup>     | y <sup>*++</sup>   | y <sup>0</sup> | y <sup>0++</sup> | #  |
|----|--------------------|--------------------|----------------|--------------------|--------------------|--------------------|----------|--------------------|--------------------|--------------------|--------------------|----------------|------------------|----|
| 1  | 132.047761         | 66.527518          |                |                    |                    |                    | <b>M</b> |                    |                    |                    |                    |                |                  | 28 |
| 2  | <b>231.116175</b>  | 116.061725         |                |                    |                    |                    | <b>V</b> | 3834.748870        | 1917.878073        | 3817.722321        | 1909.364798        | 3816.738305    | 1908.872790      | 27 |
| 3  | <b>670.341501</b>  | 335.674389         | 653.314952     | 327.161114         |                    |                    | <b>Q</b> | 3735.680456        | 1868.343866        | 3718.653907        | <b>1859.830591</b> | 3717.669891    | 1859.338583      | 26 |
| 4  | <b>799.384094</b>  | 400.195685         | 782.357545     | 391.682411         | 781.373529         | 391.190403         | <b>E</b> | 3296.455130        | 1648.731203        | 3279.428581        | 1640.217928        | 3278.444565    | 1639.725920      | 25 |
| 5  | 1238.609420        | 619.808348         | 1221.582871    | 611.295074         | 1220.598855        | 610.803066         | <b>Q</b> | 3167.412537        | 1584.209906        | 3150.385988        | 1575.696632        | 3149.401972    | 1575.204624      | 24 |
| 6  | <b>1398.640069</b> | 699.823673         | 1381.613520    | 691.310398         | 1380.629504        | 690.818390         | <b>C</b> | <b>2728.187211</b> | 1364.597243        | 2711.160662        | 1356.083969        | 2710.176646    | 1355.591961      | 23 |
| 7  | 1558.670718        | 779.838997         | 1541.644169    | 771.325723         | 1540.660153        | 770.833715         | <b>C</b> | 2568.156562        | 1284.581919        | 2551.130013        | 1276.068644        | 2550.145997    | 1275.576636      | 22 |
| 8  | <b>1695.729630</b> | <b>848.368453</b>  | 1678.703081    | 839.855179         | 1677.719065        | 839.363171         | <b>H</b> | 2408.125913        | <b>1204.566594</b> | 2391.099364        | 1196.053320        | 2390.115348    | 1195.561312      | 21 |
| 9  | 1782.761658        | 891.884467         | 1765.735109    | 883.371193         | 1764.751093        | 882.879185         | <b>S</b> | 2271.067001        | <b>1136.037138</b> | 2254.040452        | 1127.523864        | 2253.056436    | 1127.031856      | 20 |
| 10 | 1910.820236        | 955.913756         | 1893.793687    | 947.400482         | <b>1892.809671</b> | 946.908474         | <b>Q</b> | 2184.034973        | 1092.521124        | 2167.008424        | 1084.007850        | 2166.024408    | 1083.515842      | 19 |
| 11 | 2023.904300        | <b>1012.455788</b> | 2006.877751    | 1003.942514        | 2005.893735        | 1003.450506        | <b>L</b> | <b>2055.976395</b> | 1028.491835        | 2038.949846        | 1019.978561        | 2037.965830    | 1019.486553      | 18 |
| 12 | 2152.946893        | 1076.977084        | 2135.920344    | 1068.463810        | 2134.936328        | 1067.971802        | <b>E</b> | <b>1942.892331</b> | 971.949804         | 1925.865782        | 963.436529         | 1924.881766    | 962.944521       | 17 |
| 13 | <b>2281.989486</b> | <b>1141.498381</b> | 2264.962937    | 1132.985106        | 2263.978921        | 1132.493098        | <b>E</b> | <b>1813.849738</b> | 907.428507         | 1796.823189        | 898.915233         | 1795.839173    | 898.423225       | 16 |
| 14 | <b>2395.073550</b> | 1198.040413        | 2378.047001    | 1189.527138        | <b>2377.062985</b> | 1189.035130        | <b>L</b> | <b>1684.807145</b> | 842.907211         | 1667.780596        | 834.393936         | 1666.796580    | 833.901928       | 15 |
| 15 | 2532.132462        | 1266.569869        | 2515.105913    | 1258.056594        | 2514.121897        | 1257.564586        | <b>H</b> | <b>1571.723081</b> | <b>786.365179</b>  | 1554.696532        | 777.851904         | 1553.712516    | 777.359896       | 14 |
| 16 | <b>2692.163111</b> | <b>1346.585193</b> | 2675.136562    | 1338.071919        | <b>2674.152546</b> | <b>1337.579911</b> | <b>C</b> | <b>1434.664169</b> | 717.835723         | <b>1417.637620</b> | <b>709.322448</b>  | 1416.653604    | 708.830440       | 13 |
| 17 | 2763.200225        | 1382.103750        | 2746.173676    | 1373.590476        | 2745.189660        | 1373.098468        | <b>A</b> | <b>1274.633520</b> | 637.820398         | 1257.606971        | 629.307124         | 1256.622955    | 628.815116       | 12 |
| 18 | <b>2864.247904</b> | 1432.627590        | 2847.221355    | 1424.114315        | 2846.237339        | 1423.622307        | <b>T</b> | <b>1203.596406</b> | 602.301841         | 1186.569857        | 593.788567         | 1185.585841    | 593.296559       | 11 |
| 19 | <b>2921.269368</b> | 1461.138322        | 2904.242819    | 1452.625047        | <b>2903.258803</b> | 1452.133039        | <b>G</b> | <b>1102.548727</b> | 551.778002         | 1085.522178        | 543.264727         | 1084.538162    | 542.772719       | 10 |
| 20 | 3034.353432        | <b>1517.680354</b> | 3017.326883    | 1509.167079        | 3016.342867        | 1508.675071        | <b>I</b> | <b>1045.527263</b> | 523.267270         | 1028.500714        | 514.753995         | 1027.516698    | 514.261987       | 9  |
| 21 | <b>3121.385460</b> | 1561.196368        | 3104.358911    | <b>1552.683093</b> | 3103.374895        | <b>1552.191085</b> | <b>S</b> | <b>932.443199</b>  | 466.725238         | 915.416650         | 458.211963         | 914.432634     | 457.719955       | 8  |
| 22 | 3234.469524        | 1617.738400        | 3217.442975    | 1609.225125        | 3216.458959        | 1608.733117        | <b>L</b> | <b>845.411171</b>  | 423.209224         | 828.384622         | 414.695949         | 827.400606     | 414.203941       | 7  |
| 23 | 3305.506638        | 1653.256957        | 3288.480089    | 1644.743683        | 3287.496073        | 1644.251675        | <b>A</b> | <b>732.327107</b>  | 366.667192         | 715.300558         | 358.153917         | 714.316542     | 357.661909       | 6  |
| 24 | 3419.549565        | 1710.278421        | 3402.523016    | 1701.765146        | 3401.539000        | 1701.273138        | <b>N</b> | <b>661.289993</b>  | 331.148635         | 644.263444         | 322.635360         | 643.279428     | 322.143352       | 5  |
| 25 | 3548.592158        | 1774.799717        | 3531.565609    | 1766.286443        | 3530.581593        | 1765.794435        | <b>E</b> | <b>547.247066</b>  | 274.127171         | 530.220517         | 265.613897         | 529.236501     | 265.121889       | 4  |
| 26 | 3676.650736        | 1838.829006        | 3659.624187    | 1830.315732        | 3658.640171        | 1829.823724        | <b>Q</b> | <b>418.204473</b>  | 209.605874         | 401.177924         | 201.092600         | 400.193908     | 200.600592       | 3  |
| 27 | 3791.677679        | 1896.342478        | 3774.651130    | 1887.829203        | 3773.667114        | 1887.337195        | <b>D</b> | <b>290.145895</b>  | 145.576585         | 273.119346         | 137.063311         | 272.135330     | 136.571303       | 2  |
| 28 |                    |                    |                |                    |                    |                    | <b>R</b> | <b>175.118952</b>  | 88.063114          | <b>158.092403</b>  | 79.549839          |                |                  | 1  |

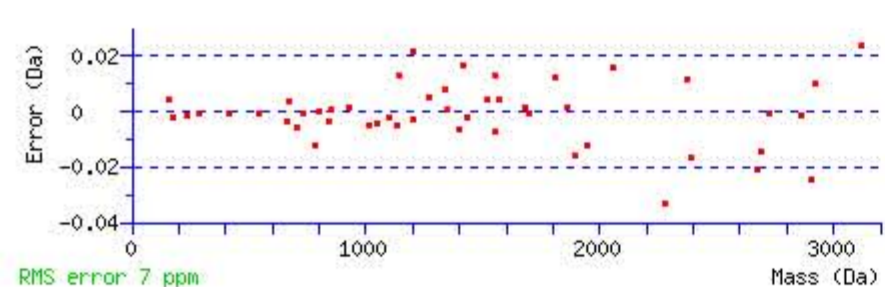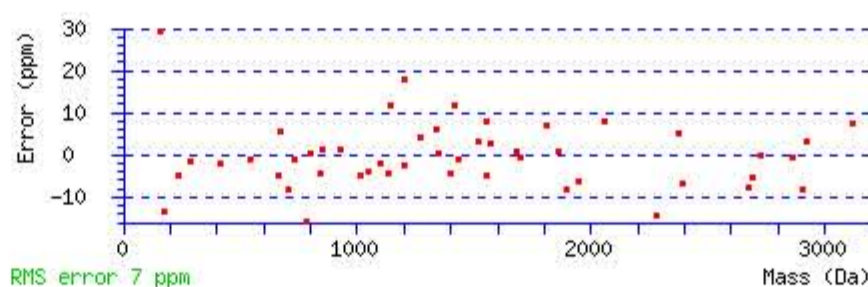

NCBI BLAST search of **MVQEQCCHSQLEELHCATGISLANEQDR**  
 (Parameters: blastp, nr protein database, expect=20000, no filter, PAM30)  
 Other BLAST [web gateways](#)

## All matches to this query

| Score | Mr(calc):   | Delta     | Sequence                                     |
|-------|-------------|-----------|----------------------------------------------|
| 80.5  | 3964.782059 | -0.000083 | <a href="#">MVQEQCCHSQLEELHCATGISLANEQDR</a> |
| 63.4  | 3964.782059 | -0.000083 | <a href="#">MVQEQCCHSQLEELHCATGISLANEQDR</a> |
| 60.9  | 3964.782059 | -0.000083 | <a href="#">MVQEQCCHSQLEELHCATGISLANEQDR</a> |

**{MATRIX} {SCIENCE} Mascot Search Results**

**Peptide View**

MS/MS Fragmentation of **MVQEQCCHSQLEELHCATGISLANEQDR**

Found in **FBLN1\_HUMAN**, Fibulin-1 OS=Homo sapiens GN=FBLN1 PE=1 SV=4

Match to Query 64806: 4275.950016 from(1069.994780,4+) rtinseconds(2326) index(33730)

Title: Locus:1.1.1.3473.14 File:"2013-07-02 CLN FXIII 180 min 3rd F 3.wiff"

Data file C:\Program Files (x86)\Matrix Science\Mascot Daemon\mgf\9 FXIII 180 min 3rd\mascot\_daemon\_merge.mgf

Click mouse within plot area to zoom in by factor of two about that point

Or, Plot from  to  Da

Label all possible matches  Label matches used for scoring

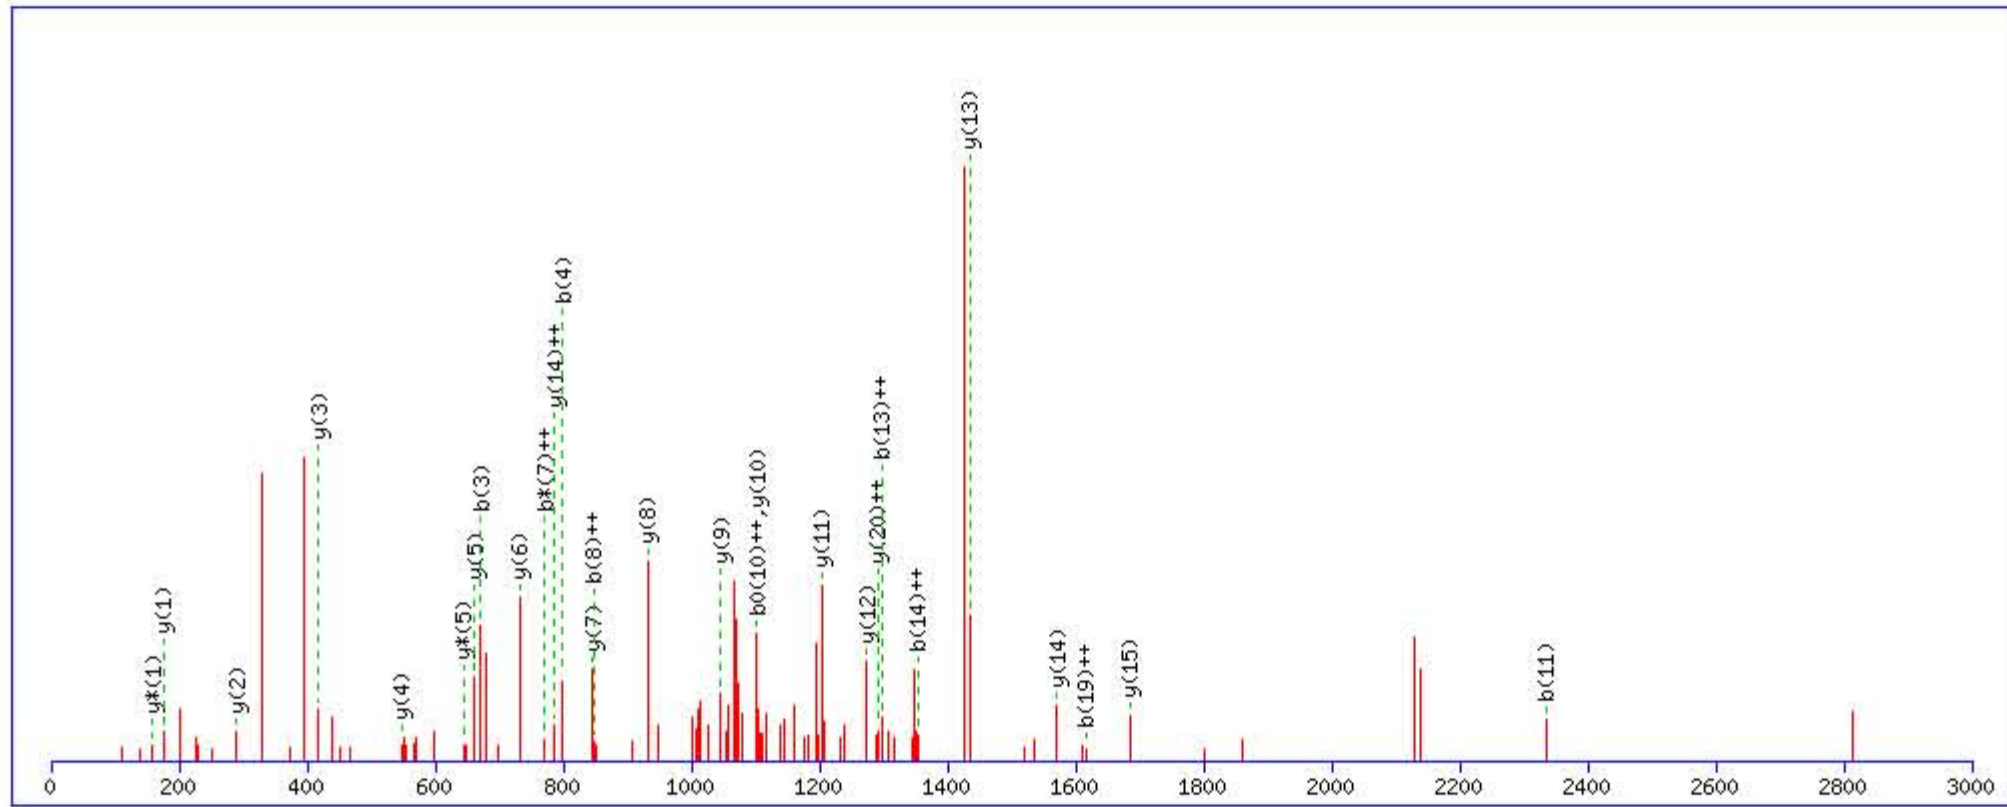

Monoisotopic mass of neutral peptide Mr(calc): 4275.948807

Fixed modifications: Carbamidomethyl (C) (apply to specified residues or termini only)

Variable modifications:

Q3 : Biotin:Thermo-21345 (Q)

Q5 : Biotin:Thermo-21345 (Q)

Q10 : Biotin:Thermo-21345 (Q)

Ions Score: 45 Expect: 0.0003

Matches : 28/312 fragment ions using 80 most intense peaks [\(help\)](#)

| #  | b                  | b <sup>++</sup>    | b <sup>*</sup> | b <sup>*++</sup>  | b <sup>0</sup> | b <sup>0++</sup>   | Seq. | y                  | y <sup>++</sup>    | y <sup>*</sup>    | y <sup>*++</sup> | y <sup>0</sup> | y <sup>0++</sup> | #  |
|----|--------------------|--------------------|----------------|-------------------|----------------|--------------------|------|--------------------|--------------------|-------------------|------------------|----------------|------------------|----|
| 1  | 132.047761         | 66.527518          |                |                   |                |                    | M    |                    |                    |                   |                  |                |                  | 28 |
| 2  | 231.116175         | 116.061725         |                |                   |                |                    | V    | 4145.915618        | 2073.461447        | 4128.889069       | 2064.948173      | 4127.905053    | 2064.456165      | 27 |
| 3  | <b>670.341501</b>  | 335.674389         | 653.314952     | 327.161114        |                |                    | Q    | 4046.847204        | 2023.927240        | 4029.820655       | 2015.413966      | 4028.836639    | 2014.921958      | 26 |
| 4  | <b>799.384094</b>  | 400.195685         | 782.357545     | 391.682411        | 781.373529     | 391.190403         | E    | 3607.621878        | 1804.314577        | 3590.595329       | 1795.801303      | 3589.611313    | 1795.309295      | 25 |
| 5  | 1238.609420        | 619.808348         | 1221.582871    | 611.295074        | 1220.598855    | 610.803066         | Q    | 3478.579285        | 1739.793281        | 3461.552736       | 1731.280006      | 3460.568720    | 1730.787998      | 24 |
| 6  | 1398.640069        | 699.823673         | 1381.613520    | 691.310398        | 1380.629504    | 690.818390         | C    | 3039.353959        | 1520.180618        | 3022.327410       | 1511.667343      | 3021.343394    | 1511.175335      | 23 |
| 7  | 1558.670718        | 779.838997         | 1541.644169    | <b>771.325723</b> | 1540.660153    | 770.833715         | C    | 2879.323310        | 1440.165293        | 2862.296761       | 1431.652019      | 2861.312745    | 1431.160011      | 22 |
| 8  | 1695.729630        | <b>848.368453</b>  | 1678.703081    | 839.855179        | 1677.719065    | 839.363171         | H    | 2719.292661        | 1360.149969        | 2702.266112       | 1351.636694      | 2701.282096    | 1351.144686      | 21 |
| 9  | 1782.761658        | 891.884467         | 1765.735109    | 883.371193        | 1764.751093    | 882.879185         | S    | 2582.233749        | <b>1291.620513</b> | 2565.207200       | 1283.107238      | 2564.223184    | 1282.615230      | 20 |
| 10 | 2221.986984        | 1111.497130        | 2204.960435    | 1102.983855       | 2203.976419    | <b>1102.491847</b> | Q    | 2495.201721        | 1248.104499        | 2478.175172       | 1239.591224      | 2477.191156    | 1239.099216      | 19 |
| 11 | <b>2335.071048</b> | 1168.039162        | 2318.044499    | 1159.525888       | 2317.060483    | 1159.033880        | L    | 2055.976395        | 1028.491836        | 2038.949846       | 1019.978561      | 2037.965830    | 1019.486553      | 18 |
| 12 | 2464.113641        | 1232.560459        | 2447.087092    | 1224.047184       | 2446.103076    | 1223.555176        | E    | 1942.892331        | 971.949804         | 1925.865782       | 963.436529       | 1924.881766    | 962.944521       | 17 |
| 13 | 2593.156234        | <b>1297.081755</b> | 2576.129685    | 1288.568481       | 2575.145669    | 1288.076473        | E    | 1813.849738        | 907.428507         | 1796.823189       | 898.915233       | 1795.839173    | 898.423225       | 16 |
| 14 | 2706.240298        | <b>1353.623787</b> | 2689.213749    | 1345.110513       | 2688.229733    | 1344.618505        | L    | <b>1684.807145</b> | 842.907211         | 1667.780596       | 834.393936       | 1666.796580    | 833.901928       | 15 |
| 15 | 2843.299210        | 1422.153243        | 2826.272661    | 1413.639969       | 2825.288645    | 1413.147961        | H    | <b>1571.723081</b> | <b>786.365179</b>  | 1554.696532       | 777.851904       | 1553.712516    | 777.359896       | 14 |
| 16 | 3003.329859        | 1502.168568        | 2986.303310    | 1493.655293       | 2985.319294    | 1493.163285        | C    | <b>1434.664169</b> | 717.835723         | 1417.637620       | 709.322448       | 1416.653604    | 708.830440       | 13 |
| 17 | 3074.366973        | 1537.687125        | 3057.340424    | 1529.173850       | 3056.356408    | 1528.681842        | A    | <b>1274.633520</b> | 637.820398         | 1257.606971       | 629.307124       | 1256.622955    | 628.815116       | 12 |
| 18 | 3175.414652        | 1588.210964        | 3158.388103    | 1579.697690       | 3157.404087    | 1579.205682        | T    | <b>1203.596406</b> | 602.301841         | 1186.569857       | 593.788567       | 1185.585841    | 593.296559       | 11 |
| 19 | 3232.436116        | <b>1616.721696</b> | 3215.409567    | 1608.208422       | 3214.425551    | 1607.716414        | G    | <b>1102.548727</b> | 551.778002         | 1085.522178       | 543.264727       | 1084.538162    | 542.772719       | 10 |
| 20 | 3345.520180        | 1673.263728        | 3328.493631    | 1664.750454       | 3327.509615    | 1664.258446        | I    | <b>1045.527263</b> | 523.267270         | 1028.500714       | 514.753995       | 1027.516698    | 514.261987       | 9  |
| 21 | 3432.552208        | 1716.779742        | 3415.525659    | 1708.266468       | 3414.541643    | 1707.774460        | S    | <b>932.443199</b>  | 466.725238         | 915.416650        | 458.211963       | 914.432634     | 457.719955       | 8  |
| 22 | 3545.636272        | 1773.321774        | 3528.609723    | 1764.808500       | 3527.625707    | 1764.316492        | L    | <b>845.411171</b>  | 423.209224         | 828.384622        | 414.695949       | 827.400606     | 414.203941       | 7  |
| 23 | 3616.673386        | 1808.840331        | 3599.646837    | 1800.327057       | 3598.662821    | 1799.835049        | A    | <b>732.327107</b>  | 366.667192         | 715.300558        | 358.153917       | 714.316542     | 357.661909       | 6  |
| 24 | 3730.716313        | 1865.861795        | 3713.689764    | 1857.348520       | 3712.705748    | 1856.856512        | N    | <b>661.289993</b>  | 331.148635         | <b>644.263444</b> | 322.635360       | 643.279428     | 322.143352       | 5  |
| 25 | 3859.758906        | 1930.383091        | 3842.732357    | 1921.869817       | 3841.748341    | 1921.377809        | E    | <b>547.247066</b>  | 274.127171         | 530.220517        | 265.613897       | 529.236501     | 265.121889       | 4  |
| 26 | 3987.817484        | 1994.412380        | 3970.790935    | 1985.899106       | 3969.806919    | 1985.407098        | Q    | <b>418.204473</b>  | 209.605875         | 401.177924        | 201.092600       | 400.193908     | 200.600592       | 3  |
| 27 | 4102.844427        | 2051.925852        | 4085.817878    | 2043.412577       | 4084.833862    | 2042.920569        | D    | <b>290.145895</b>  | 145.576586         | 273.119346        | 137.063311       | 272.135330     | 136.571303       | 2  |
| 28 |                    |                    |                |                   |                |                    | R    | <b>175.118952</b>  | 88.063114          | <b>158.092403</b> | 79.549839        |                |                  | 1  |

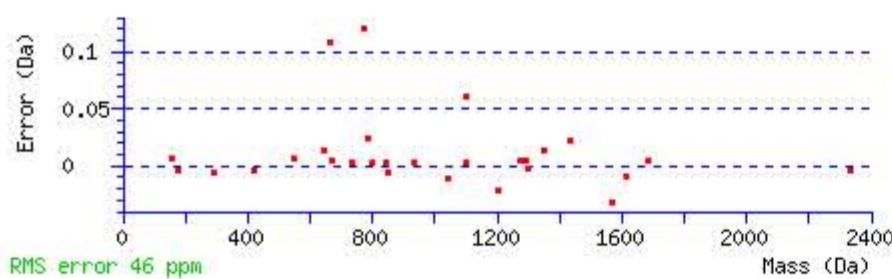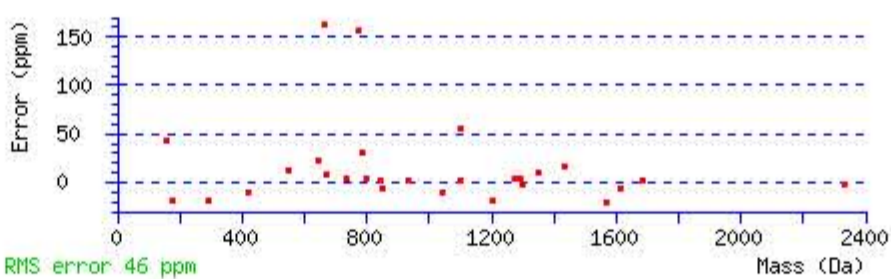

NCBI BLAST search of **MVQEQCCHSQLEELHCATGISLANEQDR**

(Parameters: blastp, nr protein database, expect=20000, no filter, PAM30)

Other BLAST [web gateways](#)

All matches to this query

| Score | Mr(calc):   | Delta    | Sequence                            |
|-------|-------------|----------|-------------------------------------|
| 45.4  | 4275.948807 | 0.001209 | <b>MVQEQCCHSQLEELHCATGISLANEQDR</b> |

Mascot: <http://www.matrixscience.com/>

# MASCOT SEARCH RESULTS

## Peptide View

MS/MS Fragmentation of **LLGEVDHYQLALGK**

Found in **FCN3\_HUMAN**, Ficolin-3 OS=Homo sapiens GN=FCN3 PE=1 SV=2

Match to Query 36975: 1866.005862 from(623.009230,3+) rtinseconds(2227) index(20351)

Title: Locus:1.1.1.3341.10 File:"2013-07-02 CLN FXIII 180 min 3rd F 2.wiff"

Data file C:\Program Files (x86)\Matrix Science\Mascot Daemon\mgf9 FXIII 180 min 3rd\mascot\_daemon\_merge.mgf

Click mouse within plot area to zoom in by factor of two about that point

Or, Plot from  to  Da

Label all possible matches  Label matches used for scoring

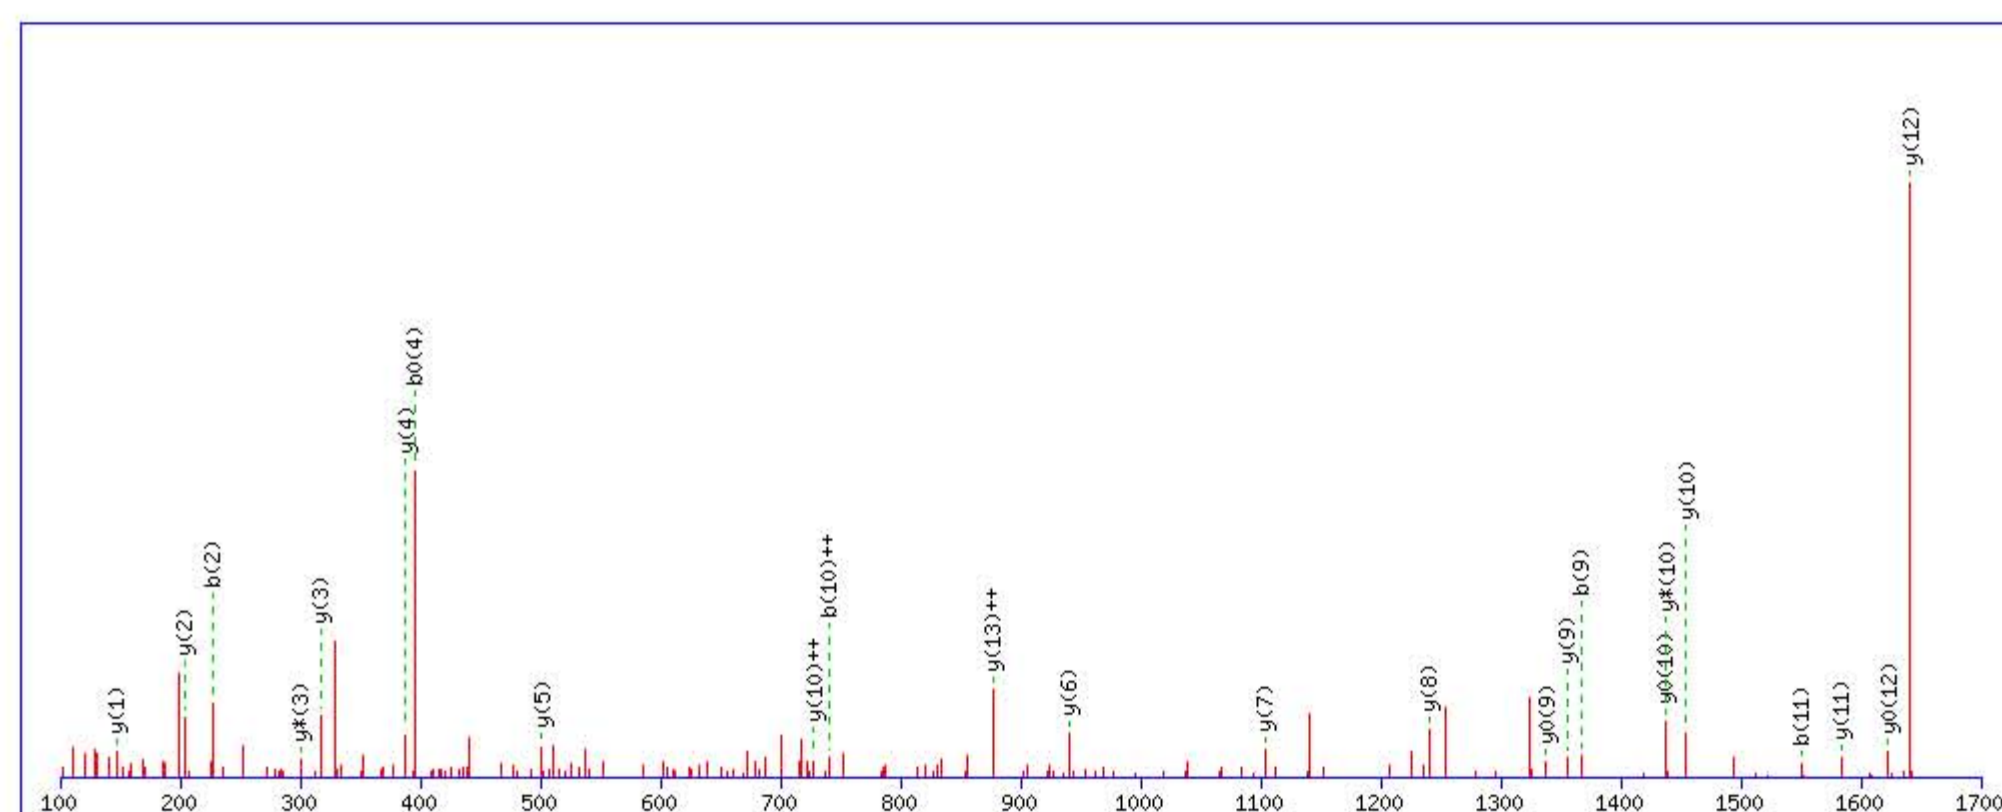

Monoisotopic mass of neutral peptide Mr(calc): 1866.007324

Fixed modifications: Carbamidomethyl (C) (apply to specified residues or termini only)

Variable modifications:

Q9 : Biotin:Thermo-21345 (Q)

Ions Score: 56 Expect: 4.9e-005

Matches : 24/118 fragment ions using 64 most intense peaks [\(help\)](#)

| #  | b                  | b <sup>++</sup>   | b <sup>*</sup> | b <sup>*++</sup> | b <sup>0</sup>    | b <sup>0++</sup> | Seq. | y                  | y <sup>++</sup>   | y <sup>*</sup>     | y <sup>*++</sup> | y <sup>0</sup>     | y <sup>0++</sup> | #  |
|----|--------------------|-------------------|----------------|------------------|-------------------|------------------|------|--------------------|-------------------|--------------------|------------------|--------------------|------------------|----|
| 1  | 114.091340         | 57.549308         |                |                  |                   |                  | L    |                    |                   |                    |                  |                    |                  | 14 |
| 2  | <b>227.175404</b>  | 114.091340        |                |                  |                   |                  | L    | 1753.930555        | <b>877.468916</b> | 1736.904006        | 868.955641       | 1735.919990        | 868.463633       | 13 |
| 3  | 284.196868         | 142.602072        |                |                  |                   |                  | G    | <b>1640.846491</b> | 820.926884        | 1623.819942        | 812.413609       | <b>1622.835926</b> | 811.921601       | 12 |
| 4  | 413.239461         | 207.123369        |                |                  | <b>395.228896</b> | 198.118086       | E    | <b>1583.825027</b> | 792.416152        | 1566.798478        | 783.902877       | 1565.814462        | 783.410869       | 11 |
| 5  | 512.307875         | 256.657576        |                |                  | 494.297310        | 247.652293       | V    | <b>1454.782434</b> | <b>727.894855</b> | <b>1437.755885</b> | 719.381581       | <b>1436.771869</b> | 718.889572       | 10 |
| 6  | 627.334818         | 314.171047        |                |                  | 609.324253        | 305.165765       | D    | <b>1355.714020</b> | 678.360648        | 1338.687471        | 669.847374       | <b>1337.703455</b> | 669.355366       | 9  |
| 7  | 764.393730         | 382.700503        |                |                  | 746.383165        | 373.695221       | H    | <b>1240.687077</b> | 620.847177        | 1223.660528        | 612.333902       |                    |                  | 8  |
| 8  | 927.457059         | 464.232168        |                |                  | 909.446494        | 455.226885       | Y    | <b>1103.628165</b> | 552.317721        | 1086.601616        | 543.804446       |                    |                  | 7  |
| 9  | <b>1366.682385</b> | 683.844831        | 1349.655836    | 675.331556       | 1348.671820       | 674.839548       | Q    | <b>940.564836</b>  | 470.786056        | 923.538287         | 462.272782       |                    |                  | 6  |
| 10 | 1479.766449        | <b>740.386863</b> | 1462.739900    | 731.873588       | 1461.755884       | 731.381580       | L    | <b>501.339510</b>  | 251.173393        | 484.312961         | 242.660118       |                    |                  | 5  |
| 11 | <b>1550.803563</b> | 775.905420        | 1533.777014    | 767.392145       | 1532.792998       | 766.900137       | A    | <b>388.255446</b>  | 194.631361        | 371.228897         | 186.118086       |                    |                  | 4  |
| 12 | 1663.887627        | 832.447452        | 1646.861078    | 823.934177       | 1645.877062       | 823.442169       | L    | <b>317.218332</b>  | 159.112804        | <b>300.191783</b>  | 150.599529       |                    |                  | 3  |
| 13 | 1720.909091        | 860.958184        | 1703.882542    | 852.444909       | 1702.898526       | 851.952901       | G    | <b>204.134268</b>  | 102.570772        | 187.107719         | 94.057497        |                    |                  | 2  |
| 14 |                    |                   |                |                  |                   |                  | K    | <b>147.112804</b>  | 74.060040         | 130.086255         | 65.546765        |                    |                  | 1  |

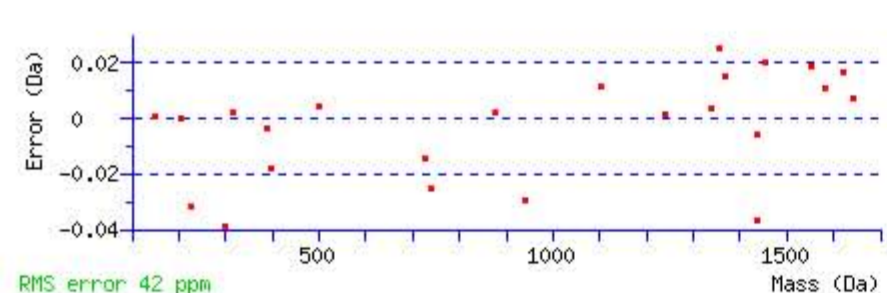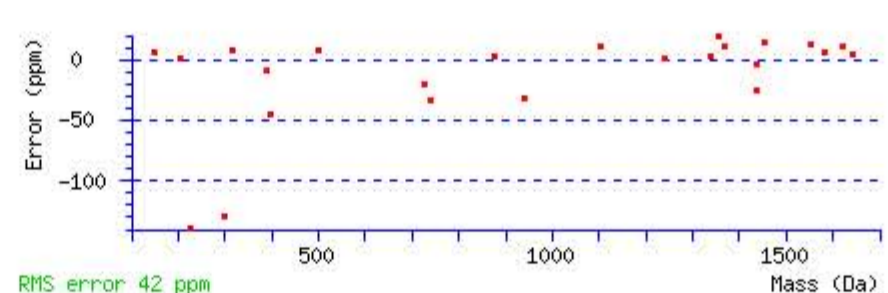

NCBI BLAST search of [LLGEVDHYQLALGK](#)

(Parameters: blastp, nr protein database, expect=20000, no filter, PAM30)

Other BLAST [web gateways](#)

### All matches to this query

| Score | Mr(calc):   | Delta     | Sequence                       |
|-------|-------------|-----------|--------------------------------|
| 56.4  | 1866.007324 | -0.001462 | <a href="#">LLGEVDHYQLALGK</a> |

Mascot: <http://www.matrixscience.com/>



# MASCOT Search Results

## Peptide View

MS/MS Fragmentation of **KSQLVYQSR**

Found in **LG3BP\_HUMAN**, Galectin-3-binding protein OS=Homo sapiens GN=LGALS3BP PE=1 SV=1

Match to Query 24663: 1418.772768 from(710.393660,2+) rtinseconds(1546) index(43177)

Title: Locus:1.1.1.3251.11 File:"2013-07-02 CLN FXIII 180 min 3rd F 4.wiff"

Data file C:\Program Files (x86)\Matrix Science\Mascot Daemon\mgf\9 FXIII 180 min 3rd\mascot\_daemon\_merge.mgf

Click mouse within plot area to zoom in by factor of two about that point

Or, Plot from  to  Da

Label all possible matches  Label matches used for scoring

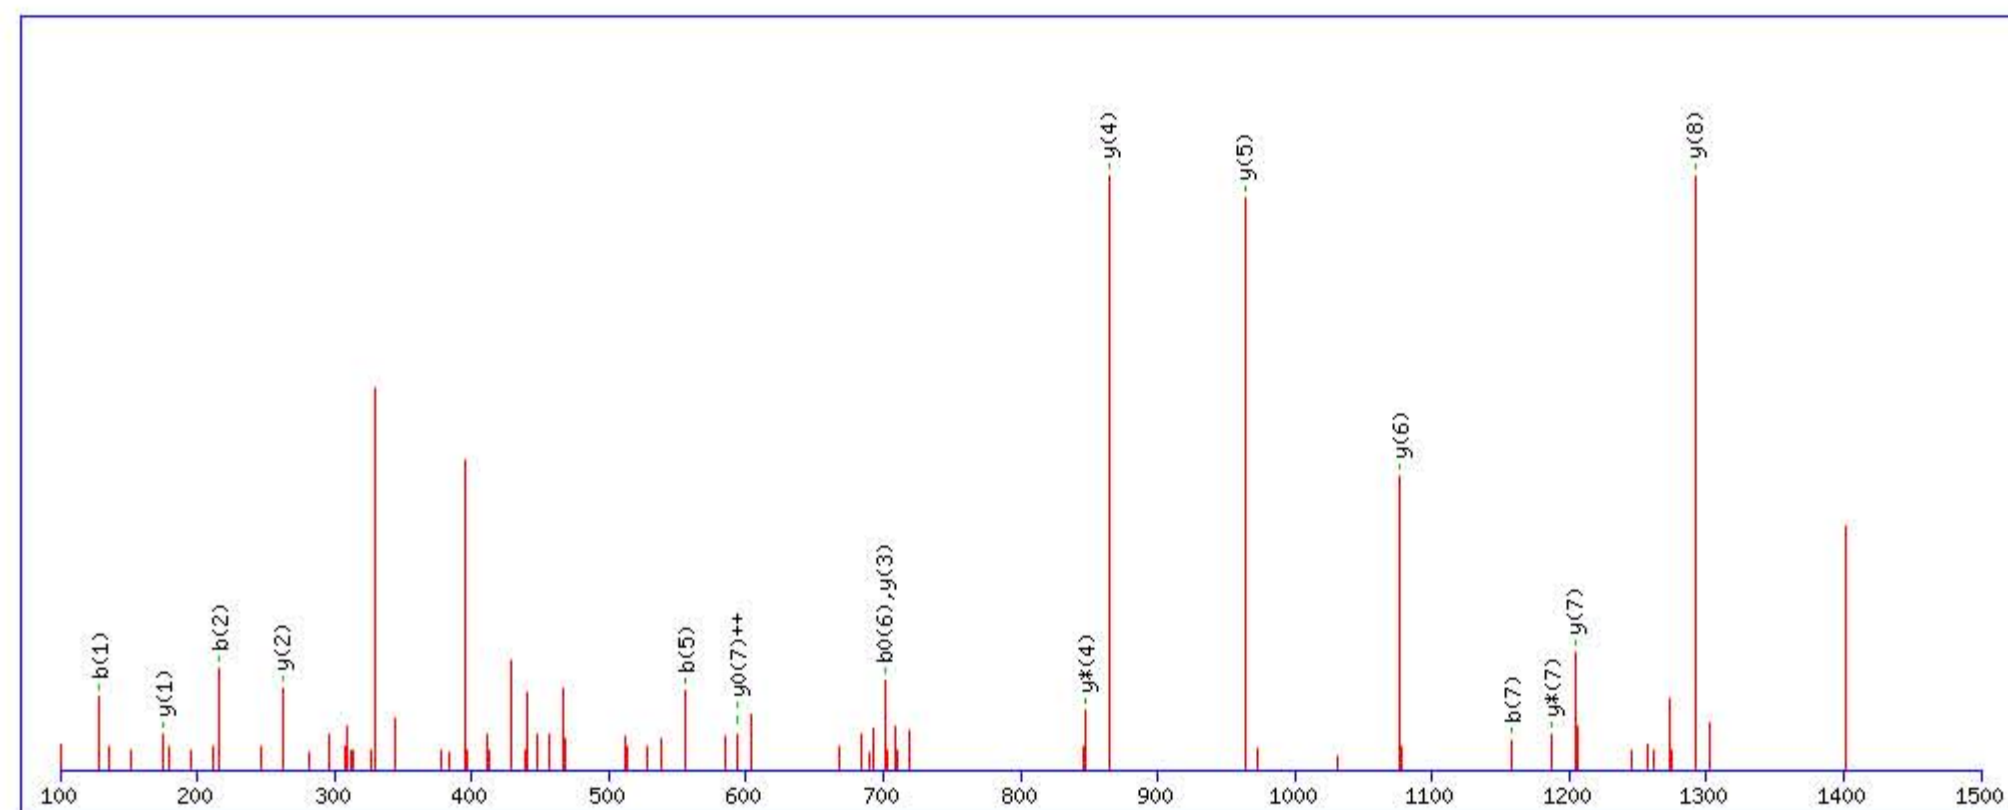

Monoisotopic mass of neutral peptide Mr(calc): 1418.770386

Fixed modifications: Carbamidomethyl (C) (apply to specified residues or termini only)

Variable modifications:

Q7 : Biotin:Thermo-21345 (Q)

Ions Score: 59 Expect: 2e-005

Matches : 16/92 fragment ions using 26 most intense peaks [\(help\)](#)

| # | b                  | b <sup>++</sup> | b <sup>*</sup> | b <sup>*++</sup> | b <sup>0</sup>    | b <sup>0++</sup> | Seq.     | y                  | y <sup>++</sup> | y <sup>*</sup>     | y <sup>*++</sup> | y <sup>0</sup> | y <sup>0++</sup>  | # |
|---|--------------------|-----------------|----------------|------------------|-------------------|------------------|----------|--------------------|-----------------|--------------------|------------------|----------------|-------------------|---|
| 1 | <b>129.102239</b>  | 65.054757       | 112.075690     | 56.541483        |                   |                  | <b>K</b> |                    |                 |                    |                  |                |                   | 9 |
| 2 | <b>216.134267</b>  | 108.570771      | 199.107718     | 100.057497       | 198.123702        | 99.565489        | <b>S</b> | <b>1291.682719</b> | 646.344998      | 1274.656170        | 637.831723       | 1273.672154    | 637.339715        | 8 |
| 3 | 344.192845         | 172.600060      | 327.166296     | 164.086786       | 326.182280        | 163.594778       | <b>Q</b> | <b>1204.650691</b> | 602.828984      | <b>1187.624142</b> | 594.315709       | 1186.640126    | <b>593.823701</b> | 7 |
| 4 | 457.276909         | 229.142092      | 440.250360     | 220.628818       | 439.266344        | 220.136810       | <b>L</b> | <b>1076.592113</b> | 538.799695      | 1059.565564        | 530.286420       | 1058.581548    | 529.794412        | 6 |
| 5 | <b>556.345323</b>  | 278.676300      | 539.318774     | 270.163025       | 538.334758        | 269.671017       | <b>V</b> | <b>963.508049</b>  | 482.257663      | 946.481500         | 473.744388       | 945.497484     | 473.252380        | 5 |
| 6 | 719.408652         | 360.207964      | 702.382103     | 351.694690       | <b>701.398087</b> | 351.202682       | <b>Y</b> | <b>864.439635</b>  | 432.723456      | <b>847.413086</b>  | 424.210181       | 846.429070     | 423.718173        | 4 |
| 7 | <b>1158.633978</b> | 579.820627      | 1141.607429    | 571.307353       | 1140.623413       | 570.815345       | <b>Q</b> | <b>701.376306</b>  | 351.191791      | 684.349757         | 342.678517       | 683.365741     | 342.186509        | 3 |
| 8 | 1245.666006        | 623.336641      | 1228.639457    | 614.823367       | 1227.655441       | 614.331359       | <b>S</b> | <b>262.150980</b>  | 131.579128      | 245.124431         | 123.065854       | 244.140415     | 122.573846        | 2 |
| 9 |                    |                 |                |                  |                   |                  | <b>R</b> | <b>175.118952</b>  | 88.063114       | 158.092403         | 79.549839        |                |                   | 1 |

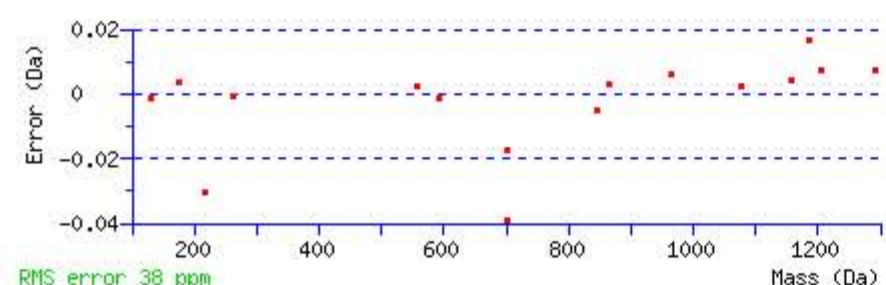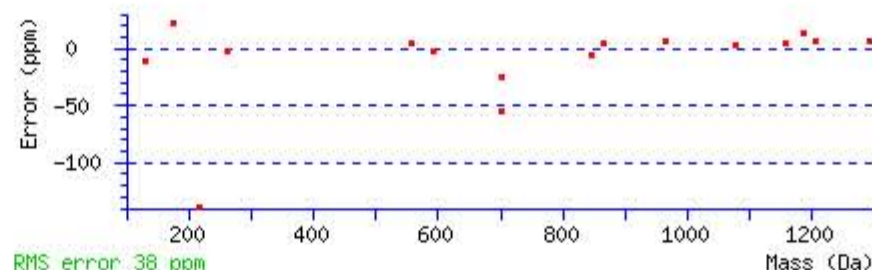

NCBI BLAST search of **KSQLVYQSR**

(Parameters: blastp, nr protein database, expect=20000, no filter, PAM30)

Other BLAST [web gateways](#)

## All matches to this query

| Score | Mr(calc):   | Delta     | Sequence                     |
|-------|-------------|-----------|------------------------------|
| 58.5  | 1418.770386 | 0.002382  | <a href="#">KSQLVYQSR</a>    |
| 11.7  | 1418.770386 | 0.002382  | <a href="#">KSQLVYQSR</a>    |
| 7.9   | 1418.788147 | -0.015379 | <a href="#">QSQVDRLYVALK</a> |
| 5.6   | 1418.780273 | -0.007505 | <a href="#">TNQLMETLKTIK</a> |
| 3.8   | 1418.778259 | -0.005491 | <a href="#">RVSLPQWPPPSR</a> |
| 0.3   | 1418.787659 | -0.014891 | <a href="#">KEILLAMLVVDK</a> |

# MASCOT Search Results

## Peptide View

MS/MS Fragmentation of **SQLVYQSR**

Found in **LG3BP\_HUMAN**, Galectin-3-binding protein OS=Homo sapiens GN=LGALS3BP PE=1 SV=1

Match to Query 30624: 1601.839452 from(534.953760,3+) rtinseconds(2092) index(46537)

Title: Locus:1.1.1.3441.4 File:"2013-07-02 CLN FXIII 180 min 3rd F 4.wiff"

Data file C:\Program Files (x86)\Matrix Science\Mascot Daemon\mgf\9 FXIII 180 min 3rd\mascot\_daemon\_merge.mgf

Click mouse within plot area to zoom in by factor of two about that point

Or, Plot from  to  Da

Label all possible matches  Label matches used for scoring

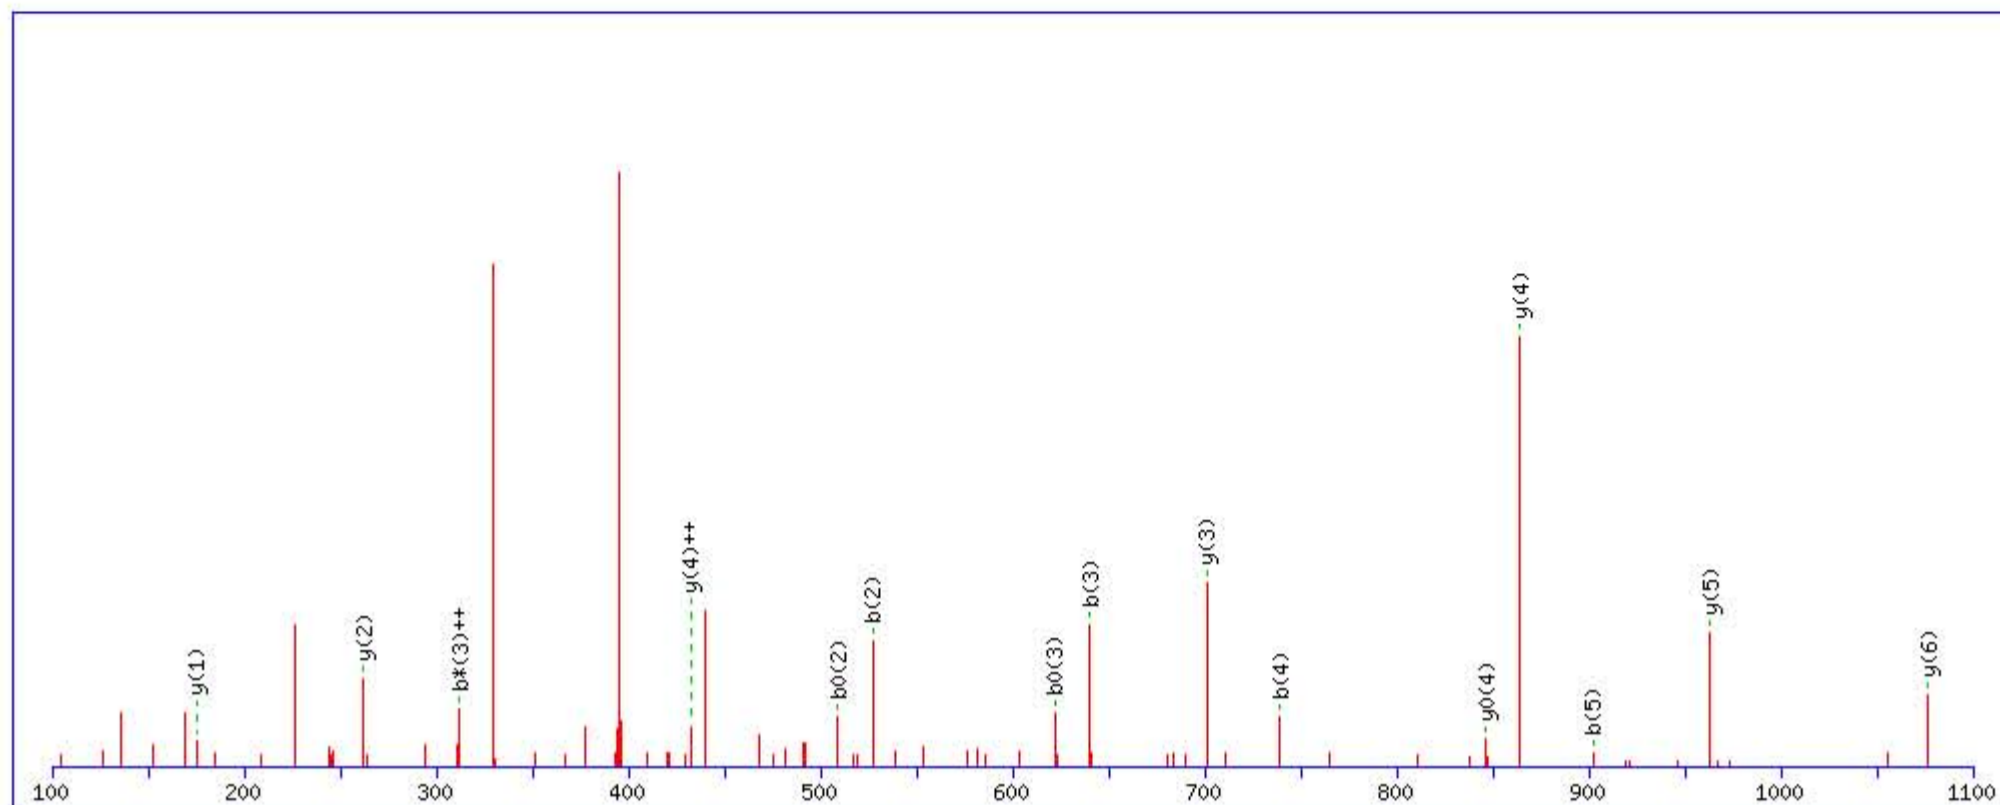

Monoisotopic mass of neutral peptide Mr(calc): 1601.842178

Fixed modifications: Carbamidomethyl (C) (apply to specified residues or termini only)

Variable modifications:

Q2 : Biotin:Thermo-21345 (Q)

Q6 : Biotin:Thermo-21345 (Q)

Ions Score: 26 Expect: 0.012

Matches : 15/80 fragment ions using 29 most intense peaks [\(help\)](#)

| # | b                 | b <sup>++</sup> | b <sup>*</sup> | b <sup>***</sup>  | b <sup>0</sup>    | b <sup>0++</sup> | Seq. | y                  | y <sup>++</sup>   | y <sup>*</sup> | y <sup>***</sup> | y <sup>0</sup>    | y <sup>0++</sup> | # |
|---|-------------------|-----------------|----------------|-------------------|-------------------|------------------|------|--------------------|-------------------|----------------|------------------|-------------------|------------------|---|
| 1 | 88.039304         | 44.523290       |                |                   | 70.028739         | 35.518008        | S    |                    |                   |                |                  |                   |                  | 8 |
| 2 | <b>527.264630</b> | 264.135953      | 510.238081     | 255.622679        | <b>509.254065</b> | 255.130671       | Q    | 1515.817439        | 758.412358        | 1498.790890    | 749.899083       | 1497.806874       | 749.407075       | 7 |
| 3 | <b>640.348694</b> | 320.677985      | 623.322145     | <b>312.164711</b> | <b>622.338129</b> | 311.672703       | L    | <b>1076.592113</b> | 538.799695        | 1059.565564    | 530.286420       | 1058.581548       | 529.794412       | 6 |
| 4 | <b>739.417108</b> | 370.212192      | 722.390559     | 361.698917        | 721.406543        | 361.206909       | V    | <b>963.508049</b>  | 482.257663        | 946.481500     | 473.744388       | 945.497484        | 473.252380       | 5 |
| 5 | <b>902.480437</b> | 451.743856      | 885.453888     | 443.230582        | 884.469872        | 442.738574       | Y    | <b>864.439635</b>  | <b>432.723456</b> | 847.413086     | 424.210181       | <b>846.429070</b> | 423.718173       | 4 |
| 6 | 1341.705763       | 671.356520      | 1324.679214    | 662.843245        | 1323.695198       | 662.351237       | Q    | <b>701.376306</b>  | 351.191791        | 684.349757     | 342.678517       | 683.365741        | 342.186509       | 3 |
| 7 | 1428.737791       | 714.872534      | 1411.711242    | 706.359259        | 1410.727226       | 705.867251       | S    | <b>262.150980</b>  | 131.579128        | 245.124431     | 123.065854       | 244.140415        | 122.573846       | 2 |
| 8 |                   |                 |                |                   |                   |                  | R    | <b>175.118952</b>  | 88.063114         | 158.092403     | 79.549839        |                   |                  | 1 |

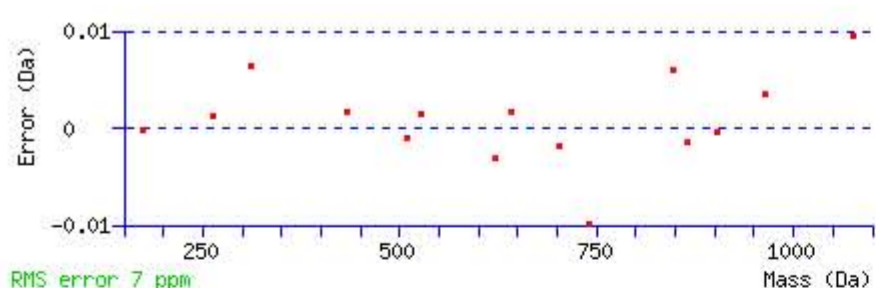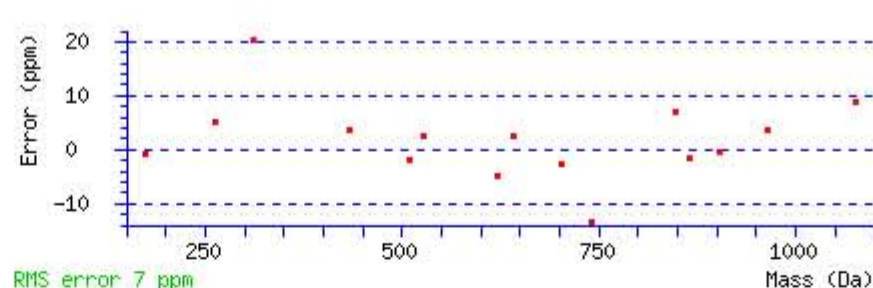

NCBI BLAST search of [SQLVYQSR](#)

(Parameters: blastp, nr protein database, expect=20000, no filter, PAM30)

Other BLAST [web gateways](#)

All matches to this query

| Score | Mr(calc):   | Delta     | Sequence                      |
|-------|-------------|-----------|-------------------------------|
| 26.1  | 1601.842178 | -0.002726 | <a href="#">SQLVYQSR</a>      |
| 5.8   | 1601.846024 | -0.006572 | <a href="#">RFVLSCSLLSHQK</a> |

Mascot: <http://www.matrixscience.com/>

# MASCOT Search Results

## Peptide View

MS/MS Fragmentation of **ELSEALGQIFDSQR**

Found in **LG3BP\_HUMAN**, Galectin-3-binding protein OS=Homo sapiens GN=LGALS3BP PE=1 SV=1

Match to Query 37448: 1902.955872 from(635.325900,3+) rtinseconds(2701) index(50077)

Title: Locus:1.1.1.3652.9 File:"2013-07-02 CLN FXIII 180 min 3rd F 4.wiff"

Data file C:\Program Files (x86)\Matrix Science\Mascot Daemon\mgf\9 FXIII 180 min 3rd\mascot\_daemon\_merge.mgf

Click mouse within plot area to zoom in by factor of two about that point

Or, Plot from  to  Da

Label all possible matches  Label matches used for scoring

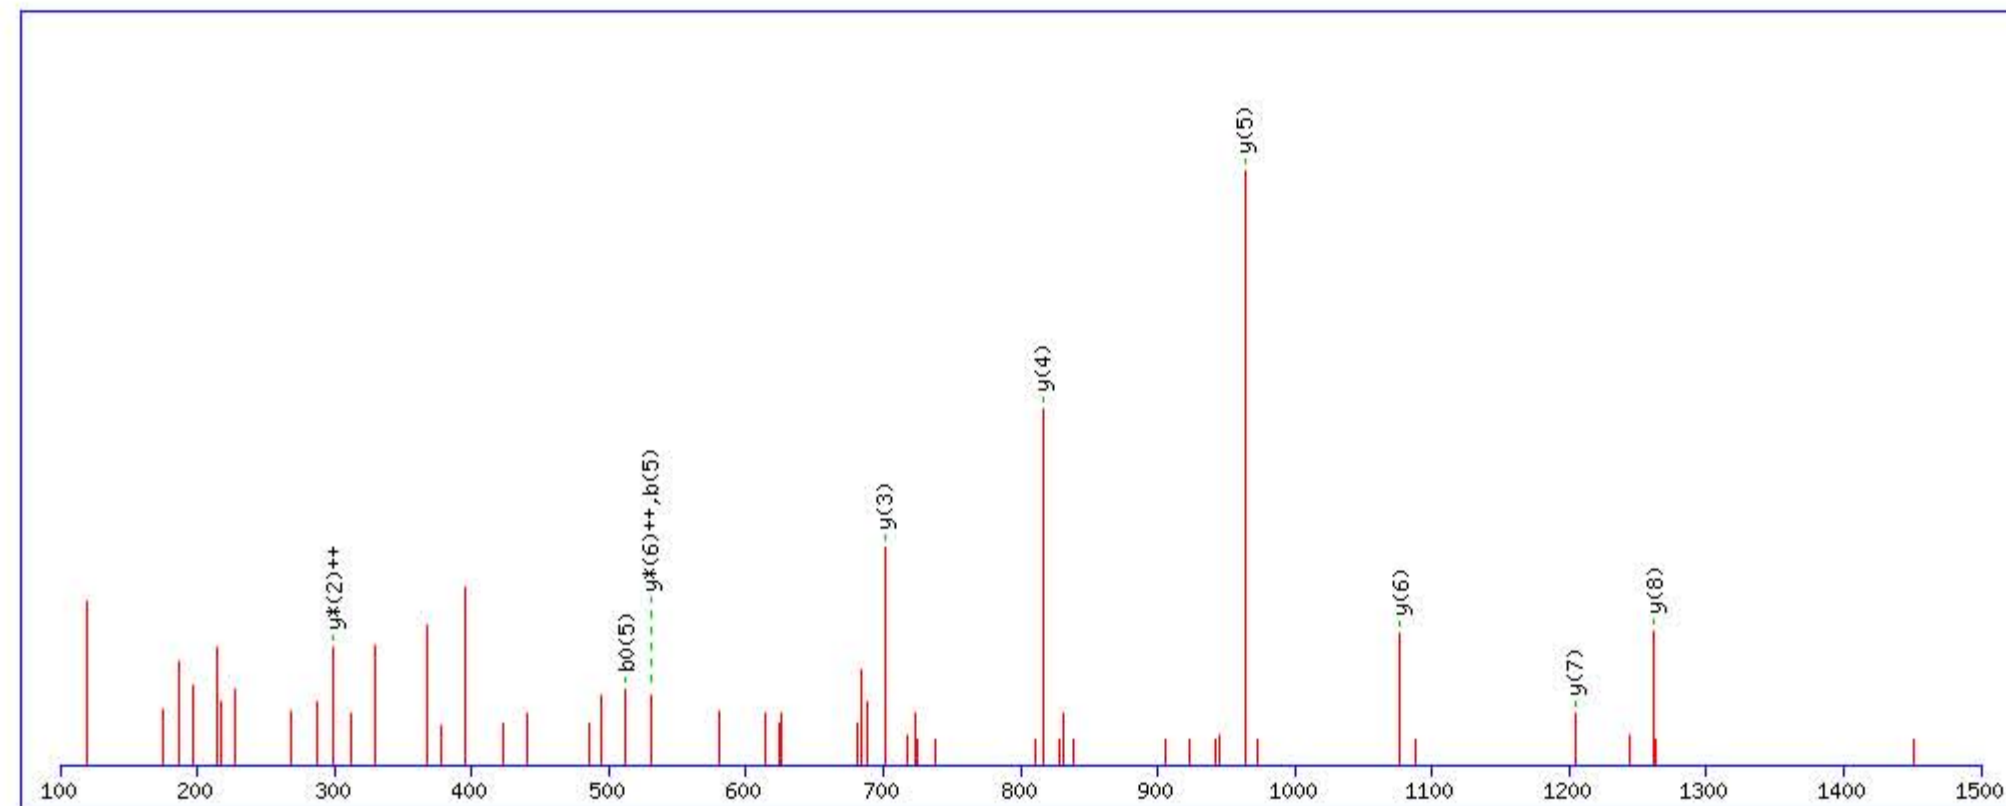

Monoisotopic mass of neutral peptide Mr(calc): 1902.950928

Fixed modifications: Carbamidomethyl (C) (apply to specified residues or termini only)

Variable modifications:

Q13 : Biotin:Thermo-21345 (Q)

Ions Score: 39 Expect: 0.00024

Matches : 10/138 fragment ions using 13 most intense peaks [\(help\)](#)

| #  | b                 | b <sup>++</sup> | b <sup>+</sup> | b <sup>+++</sup> | b <sup>0</sup>    | b <sup>0++</sup> | Seq. | y                  | y <sup>++</sup> | y <sup>+</sup> | y <sup>+++</sup>  | y <sup>0</sup> | y <sup>0++</sup> | #  |
|----|-------------------|-----------------|----------------|------------------|-------------------|------------------|------|--------------------|-----------------|----------------|-------------------|----------------|------------------|----|
| 1  | 130.049869        | 65.528572       |                |                  | 112.039304        | 56.523290        | E    |                    |                 |                |                   |                |                  | 14 |
| 2  | 243.133933        | 122.070605      |                |                  | 225.123368        | 113.065322       | L    | 1774.915632        | 887.961454      | 1757.889083    | 879.448180        | 1756.905067    | 878.956172       | 13 |
| 3  | 330.165961        | 165.586618      |                |                  | 312.155396        | 156.581336       | S    | 1661.831568        | 831.419422      | 1644.805019    | 822.906148        | 1643.821003    | 822.414140       | 12 |
| 4  | 459.208554        | 230.107915      |                |                  | 441.197989        | 221.102633       | E    | 1574.799540        | 787.903408      | 1557.772991    | 779.390134        | 1556.788975    | 778.898126       | 11 |
| 5  | <b>530.245668</b> | 265.626472      |                |                  | <b>512.235103</b> | 256.621190       | A    | 1445.756947        | 723.382112      | 1428.730398    | 714.868837        | 1427.746382    | 714.376829       | 10 |
| 6  | 643.329732        | 322.168504      |                |                  | 625.319167        | 313.163222       | L    | 1374.719833        | 687.863555      | 1357.693284    | 679.350280        | 1356.709268    | 678.858272       | 9  |
| 7  | 700.351196        | 350.679236      |                |                  | 682.340631        | 341.673954       | G    | <b>1261.635769</b> | 631.321523      | 1244.609220    | 622.808248        | 1243.625204    | 622.316240       | 8  |
| 8  | 828.409774        | 414.708525      | 811.383225     | 406.195251       | 810.399209        | 405.703243       | Q    | <b>1204.614305</b> | 602.810791      | 1187.587756    | 594.297516        | 1186.603740    | 593.805508       | 7  |
| 9  | 941.493838        | 471.250557      | 924.467289     | 462.737283       | 923.483273        | 462.245275       | I    | <b>1076.555727</b> | 538.781502      | 1059.529178    | <b>530.268227</b> | 1058.545162    | 529.776219       | 6  |
| 10 | 1088.562252       | 544.784764      | 1071.535703    | 536.271490       | 1070.551687       | 535.779482       | F    | <b>963.471663</b>  | 482.239470      | 946.445114     | 473.726195        | 945.461098     | 473.234187       | 5  |
| 11 | 1203.589195       | 602.298236      | 1186.562646    | 593.784961       | 1185.578630       | 593.292953       | D    | <b>816.403249</b>  | 408.705263      | 799.376700     | 400.191988        | 798.392684     | 399.699980       | 4  |
| 12 | 1290.621223       | 645.814250      | 1273.594674    | 637.300975       | 1272.610658       | 636.808967       | S    | <b>701.376306</b>  | 351.191791      | 684.349757     | 342.678517        | 683.365741     | 342.186509       | 3  |
| 13 | 1729.846549       | 865.426913      | 1712.820000    | 856.913638       | 1711.835984       | 856.421630       | Q    | 614.344278         | 307.675777      | 597.317729     | <b>299.162503</b> |                |                  | 2  |
| 14 |                   |                 |                |                  |                   |                  | R    | 175.118952         | 88.063114       | 158.092403     | 79.549839         |                |                  | 1  |

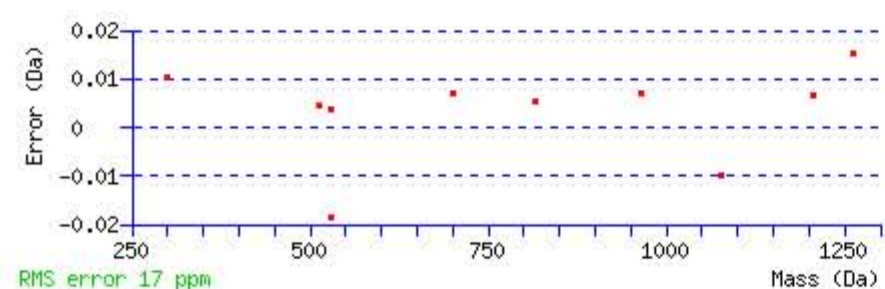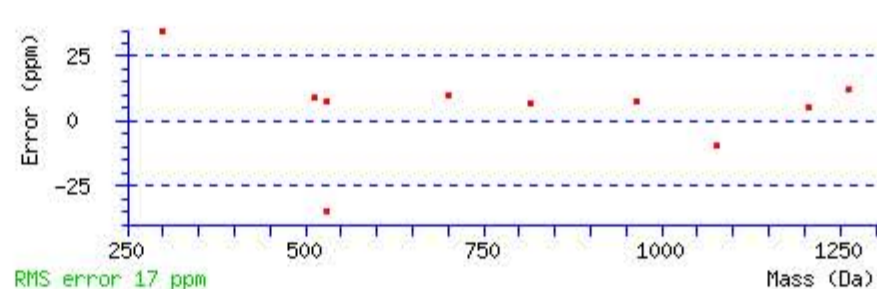

NCBI BLAST search of **ELSEALGQIFDSQR**

(Parameters: blastp, nr protein database, expect=20000, no filter, PAM30)

Other BLAST [web gateways](#)

All matches to this query

| Score | Mr(calc):   | Delta    | Sequence                       |
|-------|-------------|----------|--------------------------------|
| 38.8  | 1902.950928 | 0.004944 | <a href="#">ELSEALGQIFDSQR</a> |
| 0.3   | 1902.947739 | 0.008133 | <a href="#">MKEQLREMNLR</a>    |

Mascot: <http://www.matrixscience.com/>

# MASCOT SEARCH RESULTS

## Peptide View

MS/MS Fragmentation of **YSSDYFQAPSDYR**

Found in **LG3BP\_HUMAN**, Galectin-3-binding protein OS=Homo sapiens GN=LGALS3BP PE=1 SV=1

Match to Query 37575: 1908.840388 from(955.427470,2+) rtinseconds(2111) index(46665)

Title: Locus:1.1.1.3447.14 File:"2013-07-02 CLN FXIII 180 min 3rd F 4.wiff"

Data file C:\Program Files (x86)\Matrix Science\Mascot Daemon\mgf\9 FXIII 180 min 3rd\mascot\_daemon\_merge.mgf

Click mouse within plot area to zoom in by factor of two about that point

Or, Plot from  to  Da

Label all possible matches  Label matches used for scoring

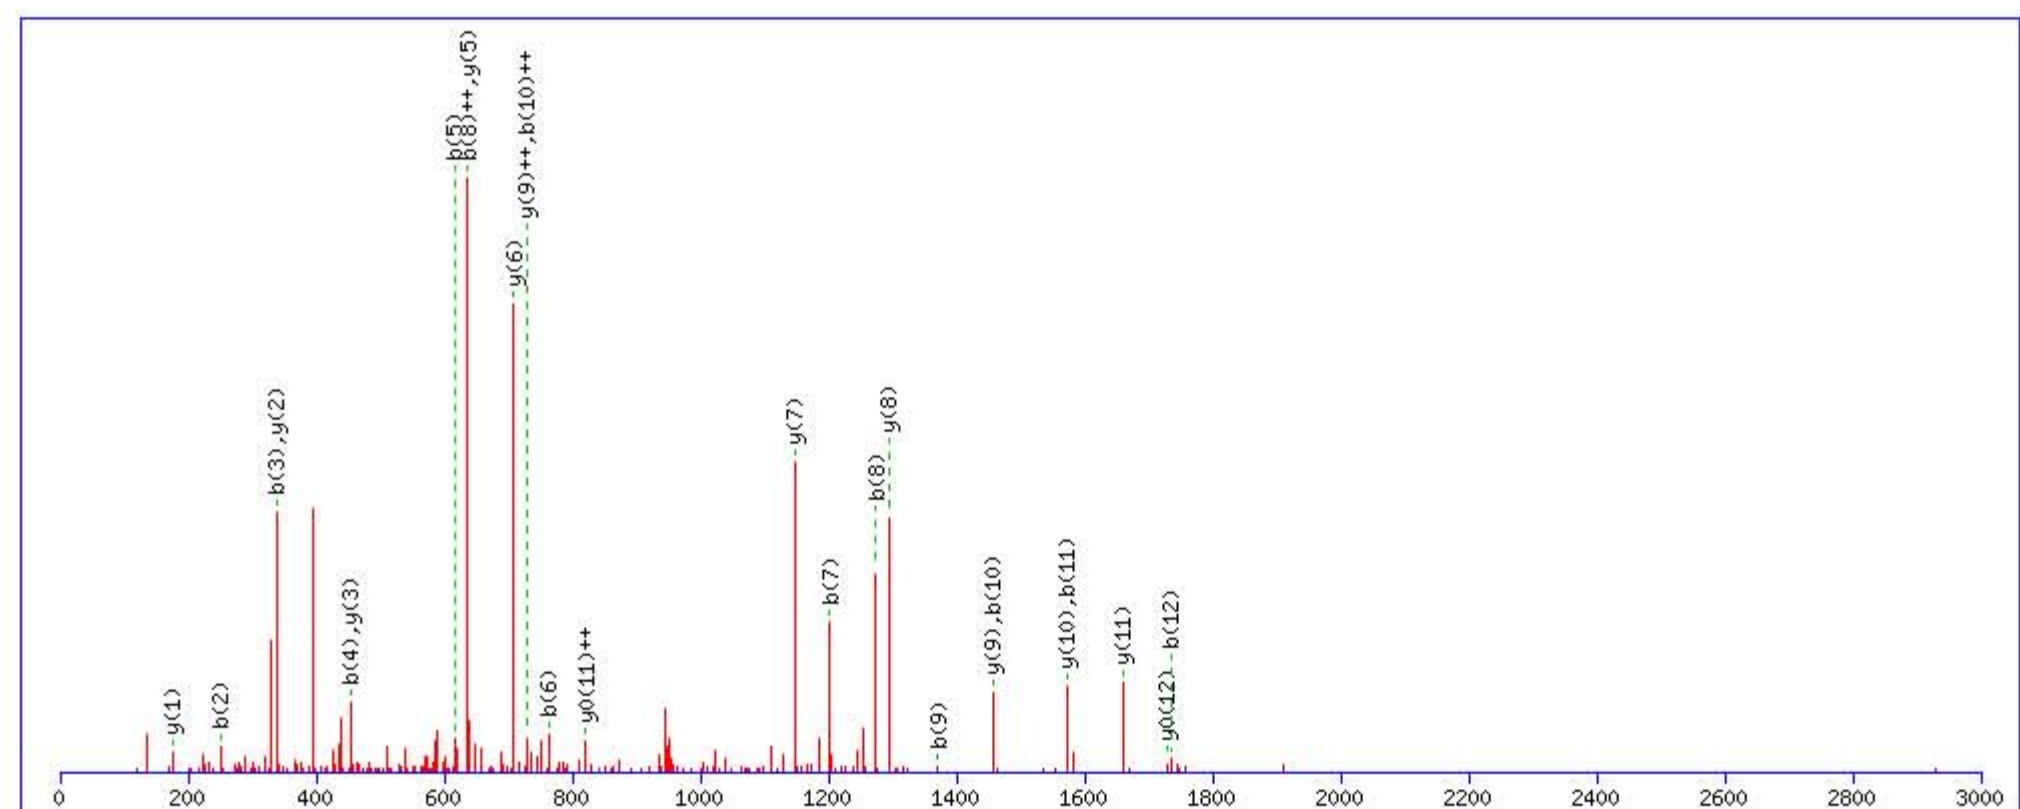

Monoisotopic mass of neutral peptide Mr(calc): 1908.835236

Fixed modifications: Carbamidomethyl (C) (apply to specified residues or termini only)

Variable modifications:

Q7 : Biotin:Thermo-21345 (Q)

Ions Score: 77 Expect: 1.1e-007

Matches : 26/126 fragment ions using 34 most intense peaks [\(help\)](#)

| #  | b                  | b <sup>++</sup>   | b <sup>*</sup> | b <sup>*++</sup> | b <sup>0</sup> | b <sup>0++</sup> | Seq. | y                  | y <sup>++</sup>   | y <sup>*</sup> | y <sup>*++</sup> | y <sup>0</sup>     | y <sup>0++</sup>  | #  |
|----|--------------------|-------------------|----------------|------------------|----------------|------------------|------|--------------------|-------------------|----------------|------------------|--------------------|-------------------|----|
| 1  | 164.070605         | 82.538940         |                |                  |                |                  | Y    |                    |                   |                |                  |                    |                   | 13 |
| 2  | <b>251.102633</b>  | 126.054954        |                |                  | 233.092068     | 117.049672       | S    | 1746.779198        | 873.893237        | 1729.752649    | 865.379963       | <b>1728.768633</b> | 864.887955        | 12 |
| 3  | <b>338.134661</b>  | 169.570968        |                |                  | 320.124096     | 160.565686       | S    | <b>1659.747170</b> | 830.377223        | 1642.720621    | 821.863949       | 1641.736605        | <b>821.371941</b> | 11 |
| 4  | <b>453.161604</b>  | 227.084440        |                |                  | 435.151039     | 218.079158       | D    | <b>1572.715142</b> | 786.861209        | 1555.688593    | 778.347935       | 1554.704577        | 777.855927        | 10 |
| 5  | <b>616.224933</b>  | 308.616105        |                |                  | 598.214368     | 299.610822       | Y    | <b>1457.688199</b> | <b>729.347738</b> | 1440.661650    | 720.834463       | 1439.677634        | 720.342455        | 9  |
| 6  | <b>763.293347</b>  | 382.150312        |                |                  | 745.282782     | 373.145029       | F    | <b>1294.624870</b> | 647.816073        | 1277.598321    | 639.302799       | 1276.614305        | 638.810791        | 8  |
| 7  | <b>1202.518673</b> | 601.762975        | 1185.492124    | 593.249700       | 1184.508108    | 592.757692       | Q    | <b>1147.556456</b> | 574.281866        | 1130.529907    | 565.768592       | 1129.545891        | 565.276584        | 7  |
| 8  | <b>1273.555787</b> | <b>637.281532</b> | 1256.529238    | 628.768257       | 1255.545222    | 628.276249       | A    | <b>708.331130</b>  | 354.669203        | 691.304581     | 346.155929       | 690.320565         | 345.663921        | 6  |
| 9  | <b>1370.608551</b> | 685.807914        | 1353.582002    | 677.294639       | 1352.597986    | 676.802631       | P    | <b>637.294016</b>  | 319.150646        | 620.267467     | 310.637372       | 619.283451         | 310.145364        | 5  |
| 10 | <b>1457.640579</b> | <b>729.323928</b> | 1440.614030    | 720.810653       | 1439.630014    | 720.318645       | S    | 540.241252         | 270.624264        | 523.214703     | 262.110990       | 522.230687         | 261.618982        | 4  |
| 11 | <b>1572.667522</b> | 786.837399        | 1555.640973    | 778.324125       | 1554.656957    | 777.832117       | D    | <b>453.209224</b>  | 227.108250        | 436.182675     | 218.594976       | 435.198659         | 218.102968        | 3  |
| 12 | <b>1735.730851</b> | 868.369064        | 1718.704302    | 859.855789       | 1717.720286    | 859.363781       | Y    | <b>338.182281</b>  | 169.594778        | 321.155732     | 161.081504       |                    |                   | 2  |
| 13 |                    |                   |                |                  |                |                  | R    | <b>175.118952</b>  | 88.063114         | 158.092403     | 79.549839        |                    |                   | 1  |

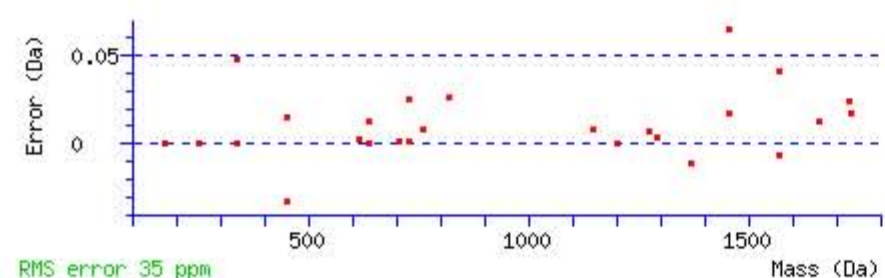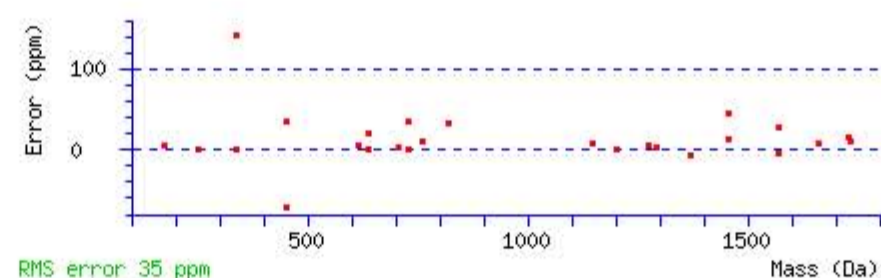

NCBI BLAST search of **YSSDYFQAPSDYR**

(Parameters: blastp, nr protein database, expect=20000, no filter, PAM30)

Other BLAST [web gateways](#)

All matches to this query

| Score | Mr(calc):   | Delta    | Sequence             |
|-------|-------------|----------|----------------------|
| 77.4  | 1908.835236 | 0.005152 | <b>YSSDYFQAPSDYR</b> |

Mascot: <http://www.matrixscience.com/>

# MASCOT SEARCH RESULTS

## Peptide View

MS/MS Fragmentation of **TGAQELLR**

Found in **GELS\_HUMAN**, Gelsolin OS=Homo sapiens GN=GSN PE=1 SV=1

Match to Query 17703: 1197.659108 from(599.836830,2+) rtinseconds(1960) index(4539)

Title: Locus:1.1.1.3202.17 File:"2013-07-02 CLN FXIII 180 min 3rd F 1.wiff"

Data file C:\Program Files (x86)\Matrix Science\Mascot Daemon\mgf9 FXIII 180 min 3rd\mascot\_daemon\_merge.mgf

Click mouse within plot area to zoom in by factor of two about that point

Or, Plot from  to  Da

Label all possible matches  Label matches used for scoring

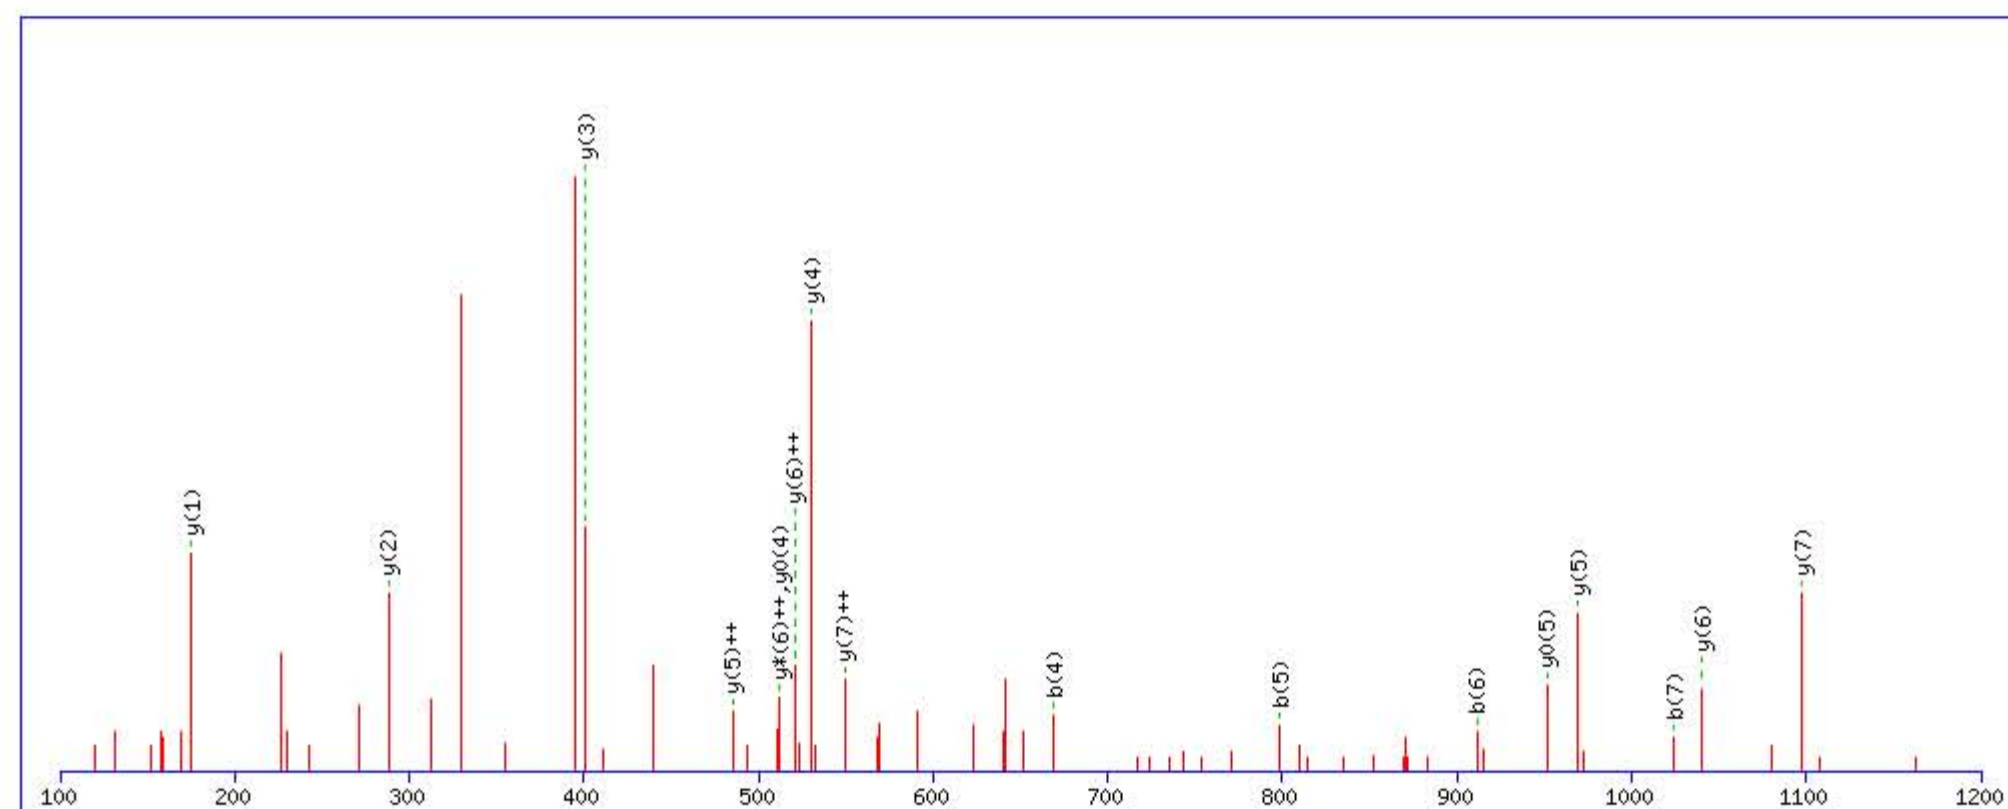

Monoisotopic mass of neutral peptide Mr(calc): 1197.653961

Fixed modifications: Carbamidomethyl (C) (apply to specified residues or termini only)

Variable modifications:

Q4 : Biotin:Thermo-21345 (Q)

Ions Score: 43 Expect: 0.0013

Matches : 17/72 fragment ions using 31 most intense peaks [\(help\)](#)

| # | b           | b <sup>++</sup> | b <sup>*</sup> | b <sup>+++</sup> | b <sup>0</sup> | b <sup>0++</sup> | Seq. | y           | y <sup>++</sup> | y <sup>*</sup> | y <sup>+++</sup> | y <sup>0</sup> | y <sup>0++</sup> | # |
|---|-------------|-----------------|----------------|------------------|----------------|------------------|------|-------------|-----------------|----------------|------------------|----------------|------------------|---|
| 1 | 102.054955  | 51.531116       |                |                  | 84.044390      | 42.525833        | T    |             |                 |                |                  |                |                  | 8 |
| 2 | 159.076419  | 80.041847       |                |                  | 141.065854     | 71.036565        | G    | 1097.613577 | 549.310427      | 1080.587028    | 540.797152       | 1079.603012    | 540.305144       | 7 |
| 3 | 230.113533  | 115.560404      |                |                  | 212.102968     | 106.555122       | A    | 1040.592113 | 520.799695      | 1023.565564    | 512.286420       | 1022.581548    | 511.794412       | 6 |
| 4 | 669.338859  | 335.173068      | 652.312310     | 326.659793       | 651.328294     | 326.167785       | Q    | 969.554999  | 485.281138      | 952.528450     | 476.767863       | 951.544434     | 476.275855       | 5 |
| 5 | 798.381452  | 399.694364      | 781.354903     | 391.181090       | 780.370887     | 390.689082       | E    | 530.329673  | 265.668475      | 513.303124     | 257.155200       | 512.319108     | 256.663192       | 4 |
| 6 | 911.465516  | 456.236396      | 894.438967     | 447.723122       | 893.454951     | 447.231114       | L    | 401.287080  | 201.147178      | 384.260531     | 192.633903       |                |                  | 3 |
| 7 | 1024.549580 | 512.778428      | 1007.523031    | 504.265153       | 1006.539015    | 503.773145       | L    | 288.203016  | 144.605146      | 271.176467     | 136.091871       |                |                  | 2 |
| 8 |             |                 |                |                  |                |                  | R    | 175.118952  | 88.063114       | 158.092403     | 79.549839        |                |                  | 1 |

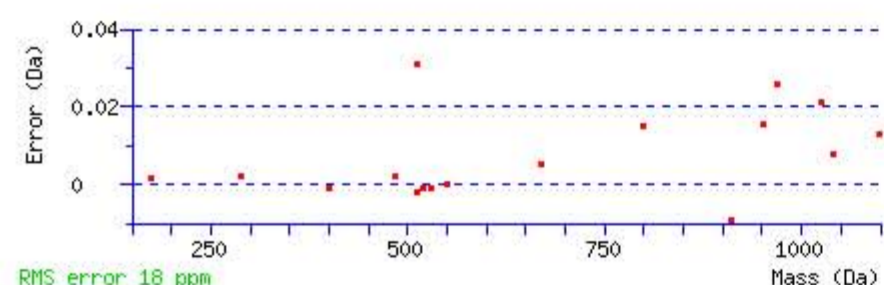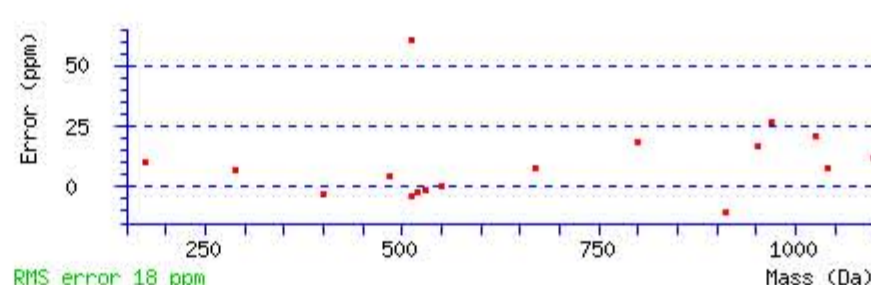

NCBI BLAST search of **TGAQELLR**

(Parameters: blastp, nr protein database, expect=20000, no filter, PAM30)

Other BLAST [web gateways](#)

All matches to this query

| Score | Mr(calc):   | Delta     | Sequence                  |
|-------|-------------|-----------|---------------------------|
| 42.8  | 1197.653961 | 0.005147  | <a href="#">TGAQELLR</a>  |
| 22.7  | 1197.653961 | 0.005147  | <a href="#">QTQEILR</a>   |
| 21.6  | 1197.653961 | 0.005147  | <a href="#">QTQEILR</a>   |
| 17.2  | 1197.669220 | -0.010112 | <a href="#">TLWAQLR</a>   |
| 14.4  | 1197.653961 | 0.005147  | <a href="#">TQQLLR</a>    |
| 13.6  | 1197.669220 | -0.010112 | <a href="#">WTLQAIR</a>   |
| 12.0  | 1197.653961 | 0.005147  | <a href="#">QTEQLLR</a>   |
| 11.6  | 1197.646545 | 0.012563  | <a href="#">RSPQAEILR</a> |
| 10.0  | 1197.653961 | 0.005147  | <a href="#">QTEQLLR</a>   |
| 9.6   | 1197.669220 | -0.010112 | <a href="#">QWTALIR</a>   |

# MASCOT Search Results

## Peptide View

MS/MS Fragmentation of **GASQAGAPQGR**

Found in **GELS\_HUMAN**, Gelsolin OS=Homo sapiens GN=GSN PE=1 SV=1

Match to Query 20511: 1309.657408 from(655.835980,2+) rtinseconds(1304) index(855)

Title: Locus:1.1.1.2973.19 File:"2013-07-02 CLN FXIII 180 min 3rd F 1.wiff"

Data file C:\Program Files (x86)\Matrix Science\Mascot Daemon\mgf9 FXIII 180 min 3rd\mascot\_daemon\_merge.mgf

Click mouse within plot area to zoom in by factor of two about that point

Or, Plot from  to  Da

Label all possible matches  Label matches used for scoring

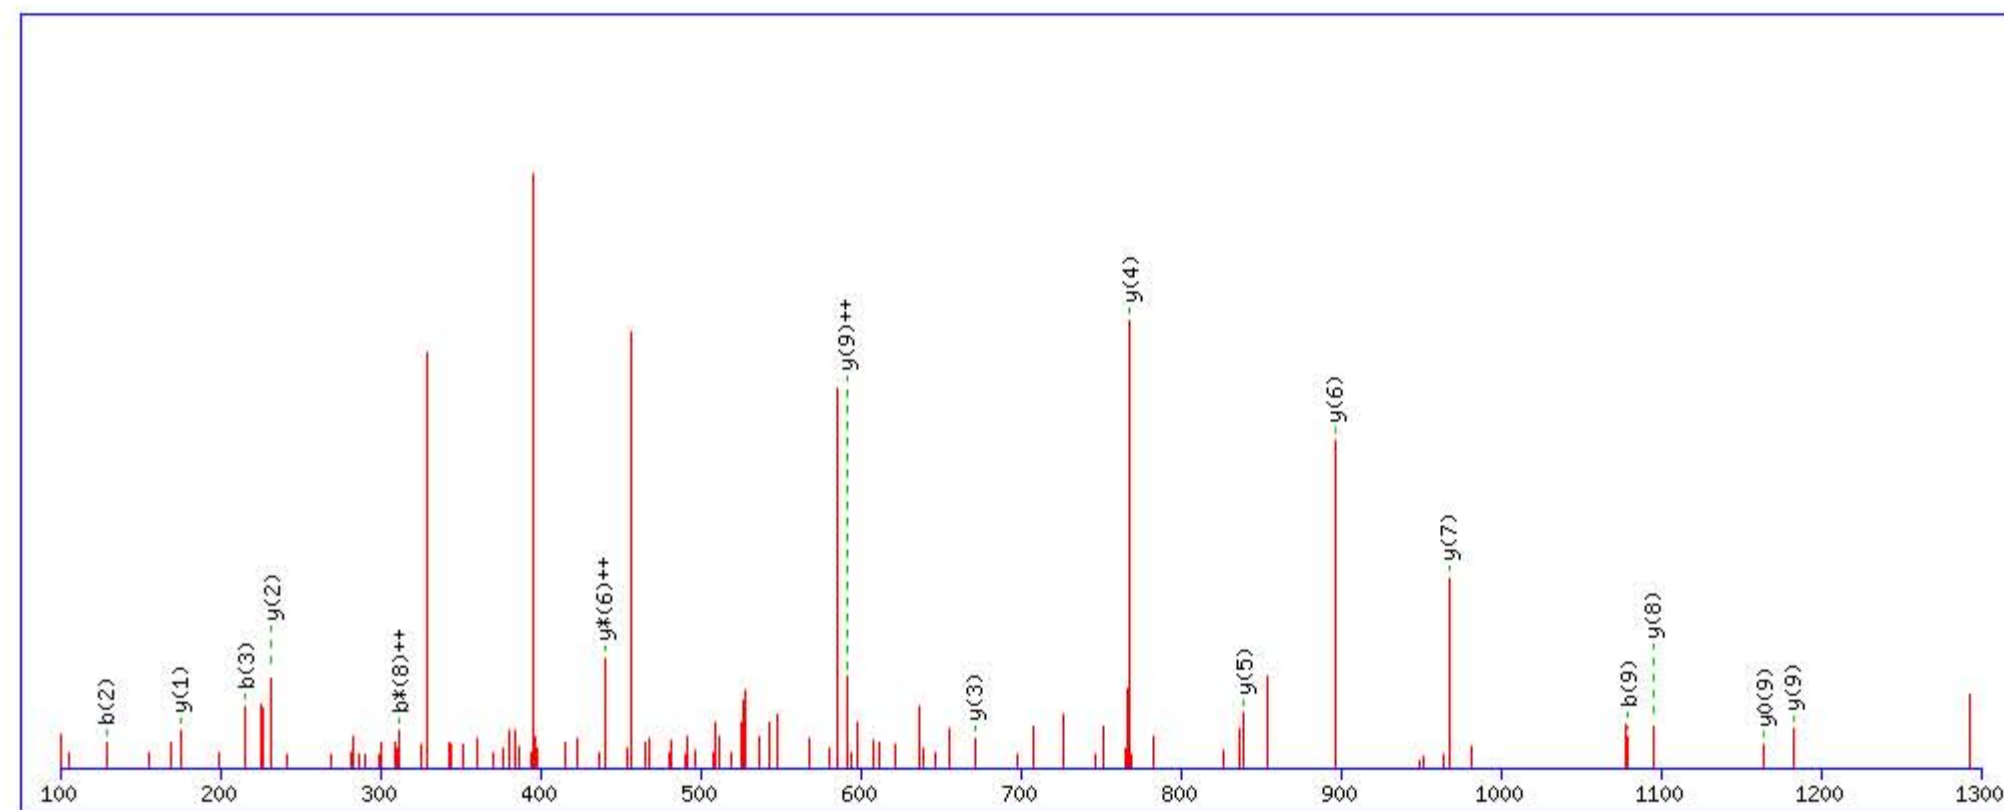

Monoisotopic mass of neutral peptide Mr(calc): 1309.656097

Fixed modifications: Carbamidomethyl (C) (apply to specified residues or termini only)

Variable modifications:

Q9 : Biotin:Thermo-21345 (Q)

Ions Score: 56 Expect: 1.4e-005

Matches : 16/94 fragment ions using 33 most intense peaks [\(help\)](#)

| #  | b                  | b <sup>++</sup> | b <sup>*</sup> | b <sup>*++</sup>  | b <sup>0</sup> | b <sup>0++</sup> | Seq. | y                  | y <sup>++</sup>   | y <sup>*</sup> | y <sup>*++</sup>  | y <sup>0</sup>     | y <sup>0++</sup> | #  |
|----|--------------------|-----------------|----------------|-------------------|----------------|------------------|------|--------------------|-------------------|----------------|-------------------|--------------------|------------------|----|
| 1  | 58.028740          | 29.518008       |                |                   |                |                  | G    |                    |                   |                |                   |                    |                  | 11 |
| 2  | <b>129.065854</b>  | 65.036565       |                |                   |                |                  | A    | 1253.641918        | 627.324597        | 1236.615369    | 618.811323        | 1235.631353        | 618.319315       | 10 |
| 3  | <b>216.097882</b>  | 108.552579      |                |                   | 198.087317     | 99.547296        | S    | <b>1182.604804</b> | <b>591.806040</b> | 1165.578255    | 583.292765        | <b>1164.594239</b> | 582.800757       | 9  |
| 4  | 344.156460         | 172.581868      | 327.129911     | 164.068593        | 326.145895     | 163.576585       | Q    | <b>1095.572776</b> | 548.290026        | 1078.546227    | 539.776752        |                    |                  | 8  |
| 5  | 415.193574         | 208.100425      | 398.167025     | 199.587150        | 397.183009     | 199.095142       | A    | <b>967.514198</b>  | 484.260737        | 950.487649     | 475.747462        |                    |                  | 7  |
| 6  | 472.215038         | 236.611157      | 455.188489     | 228.097882        | 454.204473     | 227.605874       | G    | <b>896.477084</b>  | 448.742180        | 879.450535     | <b>440.228906</b> |                    |                  | 6  |
| 7  | 543.252152         | 272.129714      | 526.225603     | 263.616440        | 525.241587     | 263.124432       | A    | <b>839.455620</b>  | 420.231448        | 822.429071     | 411.718173        |                    |                  | 5  |
| 8  | 640.304916         | 320.656096      | 623.278367     | <b>312.142822</b> | 622.294351     | 311.650814       | P    | <b>768.418506</b>  | 384.712891        | 751.391957     | 376.199616        |                    |                  | 4  |
| 9  | <b>1079.530242</b> | 540.268759      | 1062.503693    | 531.755485        | 1061.519677    | 531.263477       | Q    | <b>671.365742</b>  | 336.186509        | 654.339193     | 327.673234        |                    |                  | 3  |
| 10 | 1136.551706        | 568.779491      | 1119.525157    | 560.266217        | 1118.541141    | 559.774208       | G    | <b>232.140416</b>  | 116.573846        | 215.113867     | 108.060571        |                    |                  | 2  |
| 11 |                    |                 |                |                   |                |                  | R    | <b>175.118952</b>  | 88.063114         | 158.092403     | 79.549839         |                    |                  | 1  |

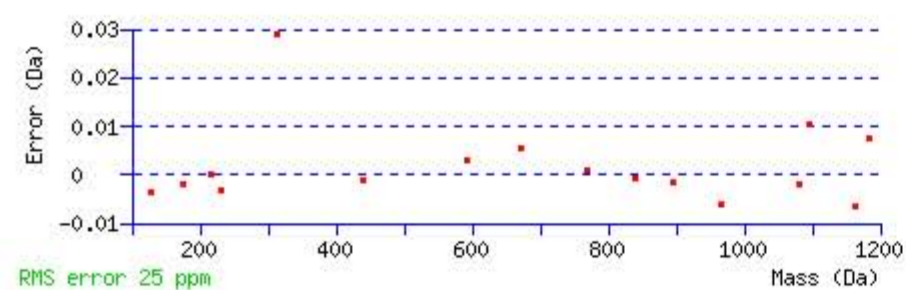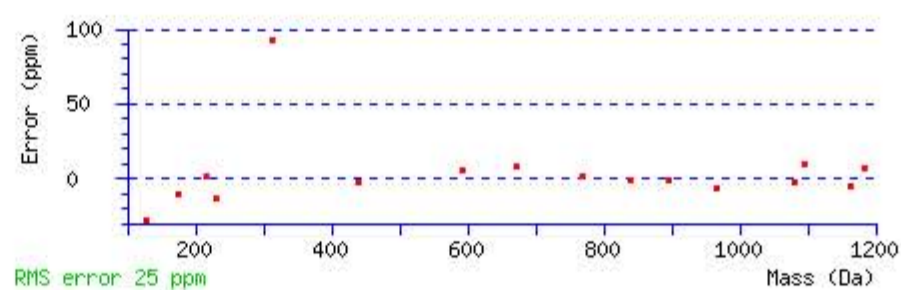

NCBI BLAST search of **GASQAGAPQGR**

(Parameters: blastp, nr protein database, expect=20000, no filter, PAM30)

Other BLAST [web gateways](#)

## All matches to this query

| Score | Mr(calc):   | Delta     | Sequence                     |
|-------|-------------|-----------|------------------------------|
| 56.2  | 1309.656097 | 0.001311  | <a href="#">GASQAGAPQGR</a>  |
| 39.9  | 1309.656097 | 0.001311  | <a href="#">GASQAGAPQGR</a>  |
| 4.1   | 1309.648682 | 0.008726  | <a href="#">SLQAQEDARHR</a>  |
| 3.5   | 1309.660110 | -0.002702 | <a href="#">TVQQRYWAMK</a>   |
| 2.7   | 1309.669998 | -0.012590 | <a href="#">LIETQMERFK</a>   |
| 0.3   | 1309.647354 | 0.010054  | <a href="#">KSESSNTTSLTR</a> |

Mascot: <http://www.matrixscience.com/>

# MASCOT Search Results

## Peptide View

MS/MS Fragmentation of **GASQAGAPQGR**

Found in **GELS\_HUMAN**, Gelsolin OS=Homo sapiens GN=GSN PE=1 SV=1

Match to Query 31395: 1620.833288 from(811.423920,2+) rtinseconds(1742) index(3412)

Title: Locus:1.1.1.3126.14 File:"2013-07-02 CLN FXIII 180 min 3rd F 1.wiff"

Data file C:\Program Files (x86)\Matrix Science\Mascot Daemon\mgf\9 FXIII 180 min 3rd\mascot\_daemon\_merge.mgf

Click mouse within plot area to zoom in by factor of two about that point

Or, Plot from 0 to 3000 Da Full range

Label all possible matches  Label matches used for scoring

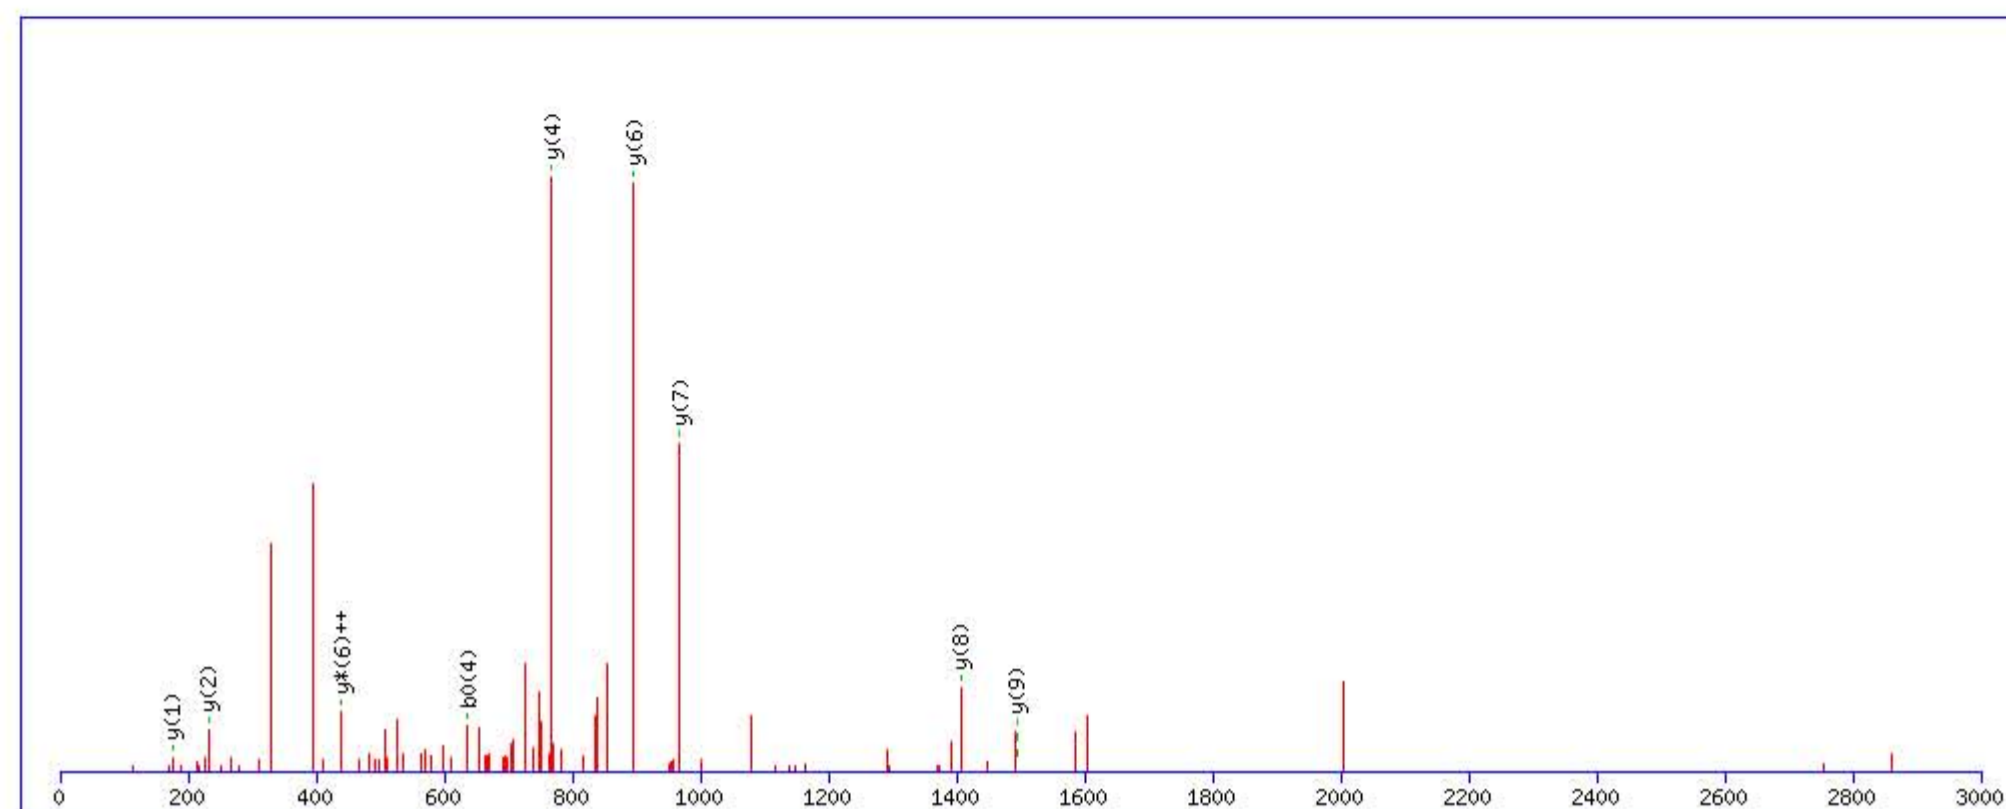

Monoisotopic mass of neutral peptide Mr(calc): 1620.822845

Fixed modifications: Carbamidomethyl (C) (apply to specified residues or termini only)

Variable modifications:

Q4 : Biotin:Thermo-21345 (Q)

Q9 : Biotin:Thermo-21345 (Q)

Ions Score: 47 Expect: 0.0002

Matches : 9/94 fragment ions using 15 most intense peaks [\(help\)](#)

| #  | b           | b <sup>++</sup> | b <sup>*</sup> | b <sup>+++</sup> | b <sup>0</sup>    | b <sup>0++</sup> | Seq. | y                  | y <sup>++</sup> | y <sup>*</sup> | y <sup>+++</sup>  | y <sup>0</sup> | y <sup>0++</sup> | #  |
|----|-------------|-----------------|----------------|------------------|-------------------|------------------|------|--------------------|-----------------|----------------|-------------------|----------------|------------------|----|
| 1  | 58.028740   | 29.518008       |                |                  |                   |                  | G    |                    |                 |                |                   |                |                  | 11 |
| 2  | 129.065854  | 65.036565       |                |                  |                   |                  | A    | 1564.808666        | 782.907971      | 1547.782117    | 774.394697        | 1546.798101    | 773.902689       | 10 |
| 3  | 216.097882  | 108.552579      |                |                  | 198.087317        | 99.547296        | S    | <b>1493.771552</b> | 747.389414      | 1476.745003    | 738.876140        | 1475.760987    | 738.384131       | 9  |
| 4  | 655.323208  | 328.165242      | 638.296659     | 319.651968       | <b>637.312643</b> | 319.159960       | Q    | <b>1406.739524</b> | 703.873400      | 1389.712975    | 695.360126        |                |                  | 8  |
| 5  | 726.360322  | 363.683799      | 709.333773     | 355.170525       | 708.349757        | 354.678517       | A    | <b>967.514198</b>  | 484.260737      | 950.487649     | 475.747463        |                |                  | 7  |
| 6  | 783.381786  | 392.194531      | 766.355237     | 383.681257       | 765.371221        | 383.189249       | G    | <b>896.477084</b>  | 448.742180      | 879.450535     | <b>440.228906</b> |                |                  | 6  |
| 7  | 854.418900  | 427.713088      | 837.392351     | 419.199814       | 836.408335        | 418.707806       | A    | 839.455620         | 420.231448      | 822.429071     | 411.718174        |                |                  | 5  |
| 8  | 951.471664  | 476.239470      | 934.445115     | 467.726196       | 933.461099        | 467.234188       | P    | <b>768.418506</b>  | 384.712891      | 751.391957     | 376.199617        |                |                  | 4  |
| 9  | 1390.696990 | 695.852133      | 1373.670441    | 687.338859       | 1372.686425       | 686.846851       | Q    | 671.365742         | 336.186509      | 654.339193     | 327.673235        |                |                  | 3  |
| 10 | 1447.718454 | 724.362865      | 1430.691905    | 715.849591       | 1429.707889       | 715.357583       | G    | <b>232.140416</b>  | 116.573846      | 215.113867     | 108.060571        |                |                  | 2  |
| 11 |             |                 |                |                  |                   |                  | R    | <b>175.118952</b>  | 88.063114       | 158.092403     | 79.549839         |                |                  | 1  |

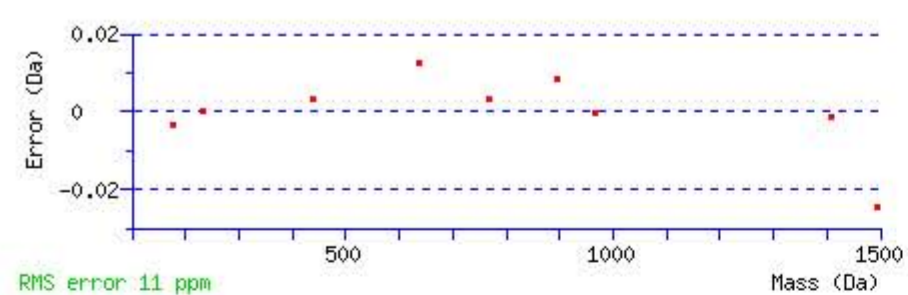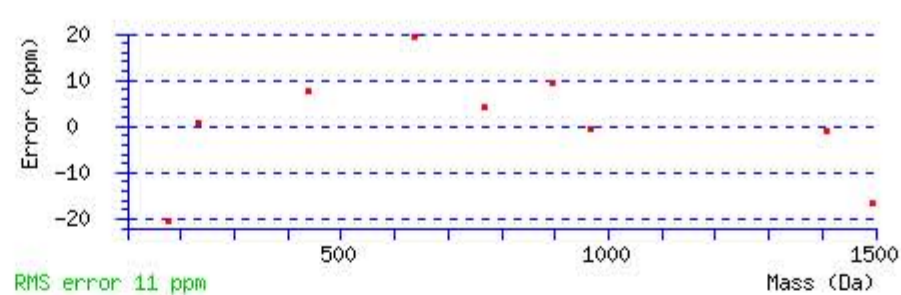

NCBI BLAST search of **GASQAGAPQGR**

(Parameters: blastp, nr protein database, expect=20000, no filter, PAM30)

Other BLAST [web gateways](#)

All matches to this query

| Score | Mr(calc):   | Delta     | Sequence                       |
|-------|-------------|-----------|--------------------------------|
| 47.1  | 1620.822845 | 0.010443  | <a href="#">GASQAGAPQGR</a>    |
| 7.4   | 1620.815430 | 0.017858  | <a href="#">AGSLASVERYCPRR</a> |
| 4.8   | 1620.841248 | -0.007960 | <a href="#">SRVTNPINPWYFK</a>  |
| 3.6   | 1620.838562 | -0.005274 | <a href="#">FHFIRHEKNHTR</a>   |

Mascot: <http://www.matrixscience.com/>

# MASCOT Search Results

## Peptide View

MS/MS Fragmentation of **QTQVSVLPEGGETPLFK**  
 Found in **GELS\_HUMAN**, Gelsolin OS=Homo sapiens GN=GSN PE=1 SV=1

Match to Query 47285: 2451.287712 from(818.103180,3+) rtinseconds(2619) index(35355)  
 Title: Locus:1.1.1.3575.17 File:"2013-07-02 CLN FXIII 180 min 3rd F 3.wiff"  
 Data file C:\Program Files (x86)\Matrix Science\Mascot Daemon\mgf\9 FXIII 180 min 3rd\mascot\_daemon\_merge.mgf

Click mouse within plot area to zoom in by factor of two about that point  
 Or, Plot from  to  Da   
 Label all possible matches  Label matches used for scoring

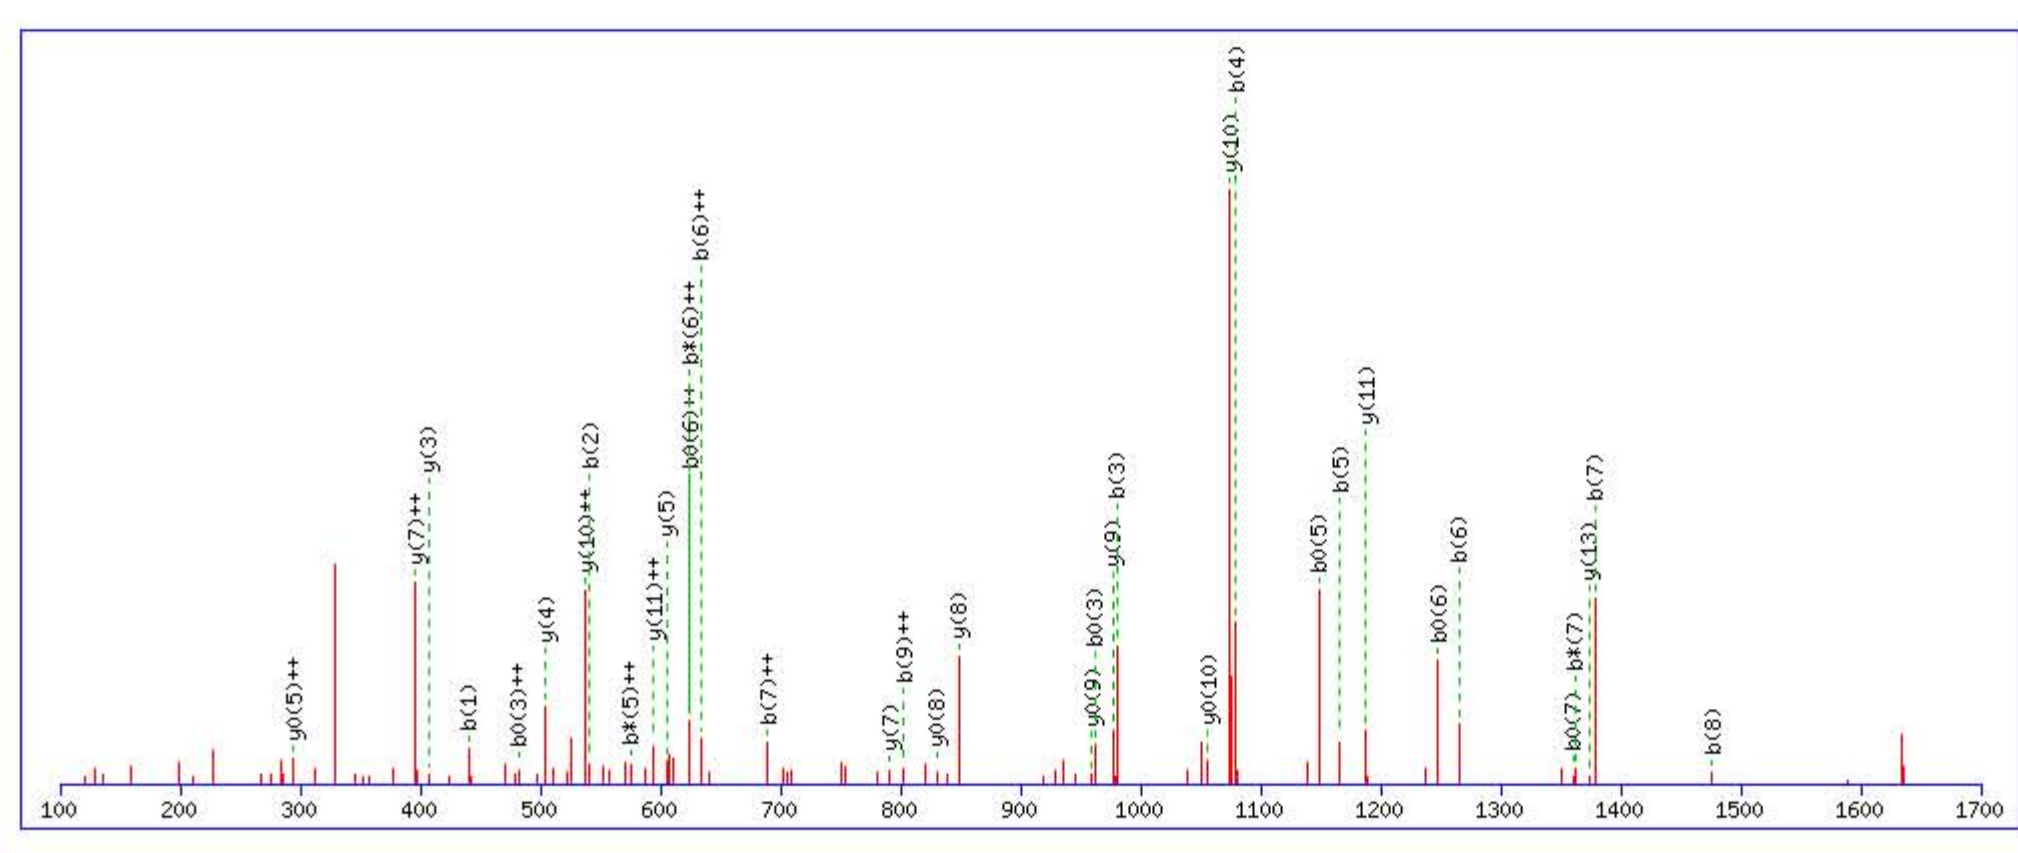

Monoisotopic mass of neutral peptide Mr(calc): 2451.290588  
 Fixed modifications: Carbamidomethyl (C) (apply to specified residues or termini only)  
 Variable modifications:  
 Q1 : Biotin:Thermo-21345 (Q)  
 Q3 : Biotin:Thermo-21345 (Q)  
 Ions Score: 36 Expect: 0.00064  
 Matches : 37/182 fragment ions using 97 most intense peaks [\(help\)](#)

| #  | b           | b <sup>++</sup> | b <sup>*</sup> | b <sup>+++</sup> | b <sup>0</sup> | b <sup>0++</sup> | Seq. | y           | y <sup>++</sup> | y <sup>*</sup> | y <sup>+++</sup> | y <sup>0</sup> | y <sup>0++</sup> | #  |
|----|-------------|-----------------|----------------|------------------|----------------|------------------|------|-------------|-----------------|----------------|------------------|----------------|------------------|----|
| 1  | 440.232602  | 220.619939      | 423.206053     | 212.106664       |                |                  | Q    |             |                 |                |                  |                |                  | 17 |
| 2  | 541.280281  | 271.143779      | 524.253732     | 262.630504       | 523.269716     | 262.138496       | T    | 2013.072528 | 1007.039902     | 1996.045979    | 998.526628       | 1995.061963    | 998.034620       | 16 |
| 3  | 980.505607  | 490.756442      | 963.479058     | 482.243167       | 962.495042     | 481.751159       | Q    | 1912.024849 | 956.516063      | 1894.998300    | 948.002788       | 1894.014284    | 947.510780       | 15 |
| 4  | 1079.574021 | 540.290649      | 1062.547472    | 531.777374       | 1061.563456    | 531.285366       | V    | 1472.799523 | 736.903400      | 1455.772974    | 728.390125       | 1454.788958    | 727.898117       | 14 |
| 5  | 1166.606049 | 583.806663      | 1149.579500    | 575.293388       | 1148.595484    | 574.801380       | S    | 1373.731109 | 687.369193      | 1356.704560    | 678.855918       | 1355.720544    | 678.363910       | 13 |
| 6  | 1265.674463 | 633.340870      | 1248.647914    | 624.827595       | 1247.663898    | 624.335587       | V    | 1286.699081 | 643.853179      | 1269.672532    | 635.339904       | 1268.688516    | 634.847896       | 12 |
| 7  | 1378.758527 | 689.882902      | 1361.731978    | 681.369627       | 1360.747962    | 680.877619       | L    | 1187.630667 | 594.318971      | 1170.604118    | 585.805697       | 1169.620102    | 585.313689       | 11 |
| 8  | 1475.811291 | 738.409284      | 1458.784742    | 729.896009       | 1457.800726    | 729.404001       | P    | 1074.546603 | 537.776940      | 1057.520054    | 529.263665       | 1056.536038    | 528.771657       | 10 |
| 9  | 1604.853884 | 802.930580      | 1587.827335    | 794.417306       | 1586.843319    | 793.925298       | E    | 977.493839  | 489.250558      | 960.467290     | 480.737283       | 959.483274     | 480.245275       | 9  |
| 10 | 1661.875348 | 831.441312      | 1644.848799    | 822.928038       | 1643.864783    | 822.436030       | G    | 848.451246  | 424.729261      | 831.424697     | 416.215986       | 830.440681     | 415.723978       | 8  |
| 11 | 1718.896812 | 859.952044      | 1701.870263    | 851.438770       | 1700.886247    | 850.946762       | G    | 791.429782  | 396.218529      | 774.403233     | 387.705254       | 773.419217     | 387.213246       | 7  |
| 12 | 1847.939405 | 924.473341      | 1830.912856    | 915.960066       | 1829.928840    | 915.468058       | E    | 734.408318  | 367.707797      | 717.381769     | 359.194523       | 716.397753     | 358.702515       | 6  |
| 13 | 1948.987084 | 974.997180      | 1931.960535    | 966.483906       | 1930.976519    | 965.991898       | T    | 605.365725  | 303.186500      | 588.339176     | 294.673226       | 587.355160     | 294.181218       | 5  |
| 14 | 2046.039848 | 1023.523562     | 2029.013299    | 1015.010288      | 2028.029283    | 1014.518280      | P    | 504.318046  | 252.662661      | 487.291497     | 244.149386       |                |                  | 4  |
| 15 | 2159.123912 | 1080.065594     | 2142.097363    | 1071.552319      | 2141.113347    | 1071.060311      | L    | 407.265282  | 204.136279      | 390.238733     | 195.623004       |                |                  | 3  |
| 16 | 2306.192326 | 1153.599801     | 2289.165777    | 1145.086526      | 2288.181761    | 1144.594518      | F    | 294.181218  | 147.594247      | 277.154669     | 139.080972       |                |                  | 2  |
| 17 |             |                 |                |                  |                |                  | K    | 147.112804  | 74.060040       | 130.086255     | 65.546765        |                |                  | 1  |

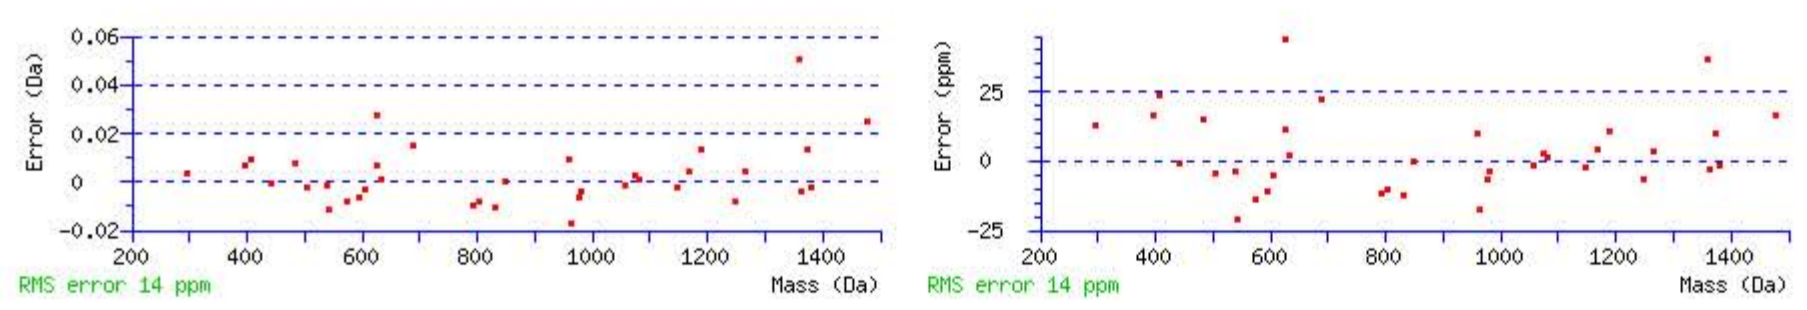

NCBI BLAST search of **QTQVSVLPEGGETPLFK**  
 (Parameters: blastp, nr protein database, expect=20000, no filter, PAM30)  
 Other BLAST [web gateways](#)

### All matches to this query

| Score | Mr(calc):   | Delta     | Sequence                              |
|-------|-------------|-----------|---------------------------------------|
| 35.8  | 2451.290588 | -0.002876 | <a href="#">QTQVSVLPEGGETPLFK</a>     |
| 1.8   | 2451.277130 | 0.010582  | <a href="#">GFPSDTQLLDLRRNHFPSVPR</a> |



**Peptide View**

MS/MS Fragmentation of **DPDQTDGLGLSYLSSHIANVER**  
 Found in **GELS\_HUMAN**, Gelsolin OS=Homo sapiens GN=GSN PE=1 SV=1

Match to Query 50349: 2697.338442 from(900.120090,3+) rtinseconds(2604) index(8137)  
 Title: Locus:1.1.1.3426.8 File:"2013-07-02 CLN FXIII 180 min 3rd F 1.wiff"  
 Data file C:\Program Files (x86)\Matrix Science\Mascot Daemon\mgf9 FXIII 180 min 3rd\mascot\_daemon\_merge.mgf

Click mouse within plot area to zoom in by factor of two about that point

Or, Plot from  to  Da

Label all possible matches  Label matches used for scoring

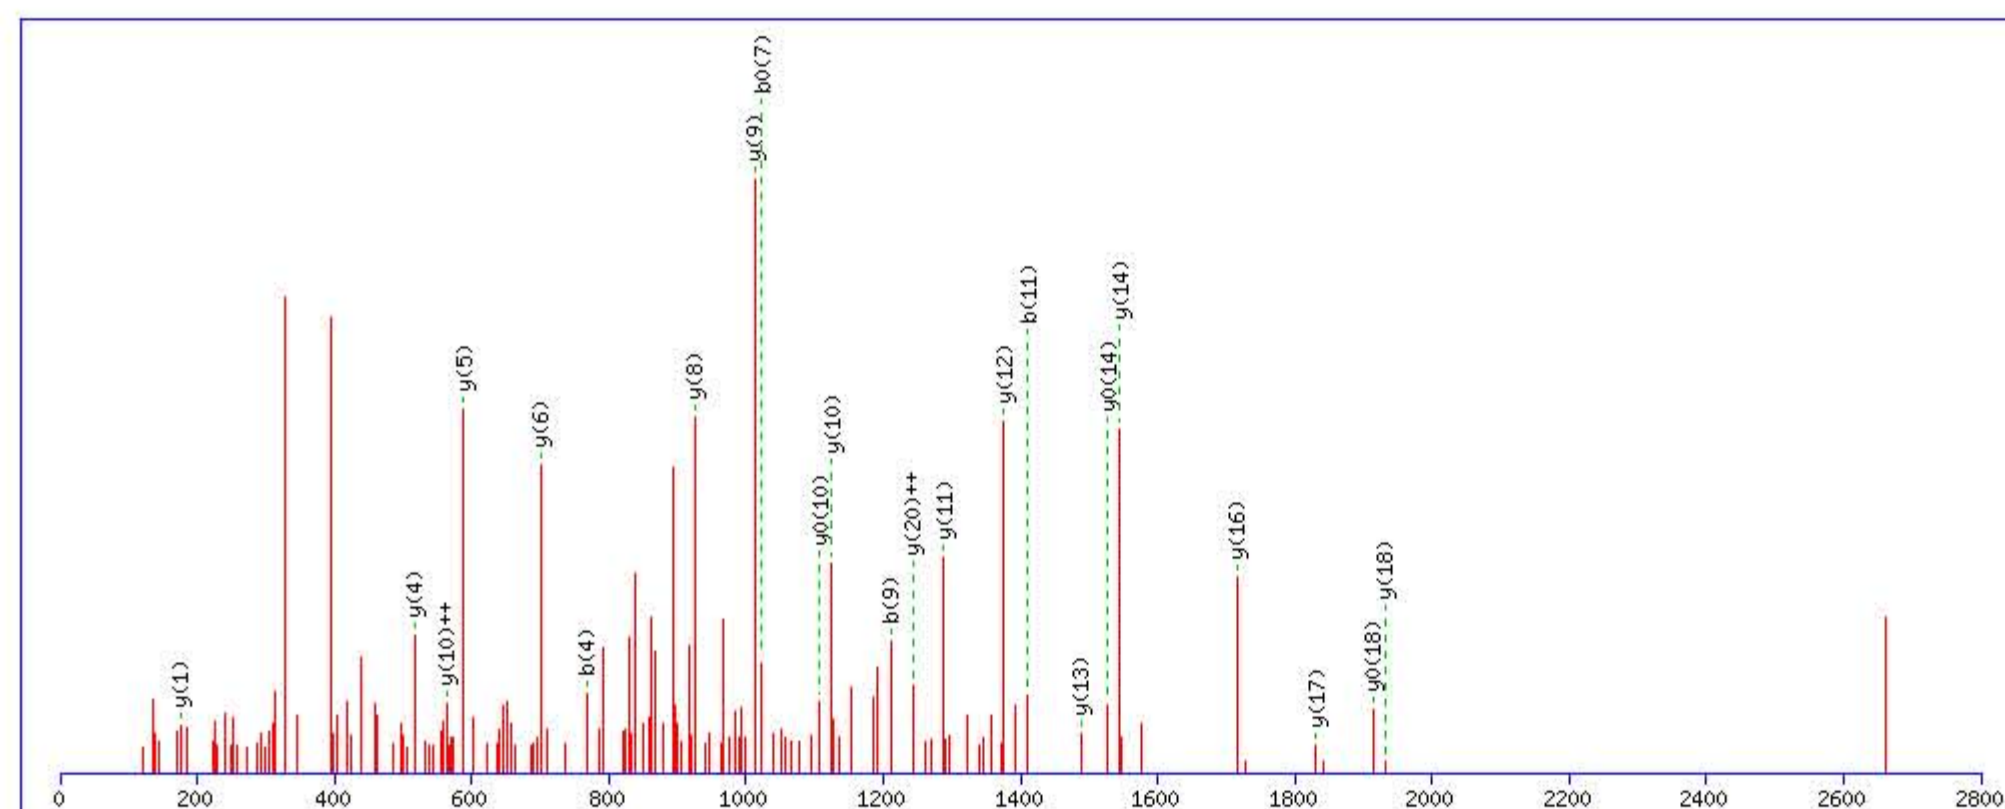

Monoisotopic mass of neutral peptide Mr(calc): 2697.306824  
 Fixed modifications: Carbamidomethyl (C) (apply to specified residues or termini only)  
 Variable modifications:  
 Q4 : Biotin:Thermo-21345 (Q)  
 Ions Score: 103 Expect: 1.5e-009  
 Matches : 23/244 fragment ions using 35 most intense peaks [\(help\)](#)

| #  | b                  | b <sup>++</sup> | b <sup>*</sup> | b <sup>*++</sup> | b <sup>0</sup>     | b <sup>0++</sup> | Seq. | y                  | y <sup>++</sup>    | y <sup>*</sup> | y <sup>*++</sup> | y <sup>0</sup>     | y <sup>0++</sup> | #  |
|----|--------------------|-----------------|----------------|------------------|--------------------|------------------|------|--------------------|--------------------|----------------|------------------|--------------------|------------------|----|
| 1  | 116.034219         | 58.520748       |                |                  | 98.023654          | 49.515465        | D    |                    |                    |                |                  |                    |                  | 22 |
| 2  | 213.086983         | 107.047129      |                |                  | 195.076418         | 98.041847        | P    | 2583.287164        | 1292.147220        | 2566.260615    | 1283.633945      | 2565.276599        | 1283.141937      | 21 |
| 3  | 328.113926         | 164.560601      |                |                  | 310.103361         | 155.555319       | D    | 2486.234400        | <b>1243.620838</b> | 2469.207851    | 1235.107563      | 2468.223835        | 1234.615555      | 20 |
| 4  | <b>767.339252</b>  | 384.173264      | 750.312703     | 375.659989       | 749.328687         | 375.167982       | Q    | 2371.207457        | 1186.107366        | 2354.180908    | 1177.594092      | 2353.196892        | 1177.102084      | 19 |
| 5  | 868.386931         | 434.697104      | 851.360382     | 426.183829       | 850.376366         | 425.691821       | T    | <b>1931.982131</b> | 966.494704         | 1914.955582    | 957.981429       | <b>1913.971566</b> | 957.489421       | 18 |
| 6  | 983.413874         | 492.210575      | 966.387325     | 483.697300       | 965.403309         | 483.205292       | D    | <b>1830.934452</b> | 915.970864         | 1813.907903    | 907.457590       | 1812.923887        | 906.965581       | 17 |
| 7  | 1040.435338        | 520.721307      | 1023.408789    | 512.208032       | <b>1022.424773</b> | 511.716025       | G    | <b>1715.907509</b> | 858.457392         | 1698.880960    | 849.944118       | 1697.896944        | 849.452110       | 16 |
| 8  | 1153.519402        | 577.263339      | 1136.492853    | 568.750065       | 1135.508837        | 568.258056       | L    | 1658.886045        | 829.946661         | 1641.859496    | 821.433386       | 1640.875480        | 820.941378       | 15 |
| 9  | <b>1210.540866</b> | 605.774071      | 1193.514317    | 597.260796       | 1192.530301        | 596.768788       | G    | <b>1545.801981</b> | 773.404629         | 1528.775432    | 764.891354       | <b>1527.791416</b> | 764.399346       | 14 |
| 10 | 1323.624930        | 662.316103      | 1306.598381    | 653.802828       | 1305.614365        | 653.310820       | L    | <b>1488.780517</b> | 744.893897         | 1471.753968    | 736.380622       | 1470.769952        | 735.888614       | 13 |
| 11 | <b>1410.656958</b> | 705.832117      | 1393.630409    | 697.318842       | 1392.646393        | 696.826834       | S    | <b>1375.696453</b> | 688.351865         | 1358.669904    | 679.838590       | 1357.685888        | 679.346582       | 12 |
| 12 | 1573.720287        | 787.363781      | 1556.693738    | 778.850507       | 1555.709722        | 778.358499       | Y    | <b>1288.664425</b> | 644.835851         | 1271.637876    | 636.322576       | 1270.653860        | 635.830568       | 11 |
| 13 | 1686.804351        | 843.905813      | 1669.777802    | 835.392539       | 1668.793786        | 834.900531       | L    | <b>1125.601096</b> | <b>563.304186</b>  | 1108.574547    | 554.790912       | <b>1107.590531</b> | 554.298904       | 10 |
| 14 | 1773.836379        | 887.421827      | 1756.809830    | 878.908553       | 1755.825814        | 878.416545       | S    | <b>1012.517032</b> | 506.762154         | 995.490483     | 498.248880       | 994.506467         | 497.756872       | 9  |
| 15 | 1860.868407        | 930.937841      | 1843.841858    | 922.424567       | 1842.857842        | 921.932559       | S    | <b>925.485004</b>  | 463.246140         | 908.458455     | 454.732866       | 907.474439         | 454.240858       | 8  |
| 16 | 1997.927319        | 999.467297      | 1980.900770    | 990.954023       | 1979.916754        | 990.462015       | H    | 838.452976         | 419.730126         | 821.426427     | 411.216852       | 820.442411         | 410.724844       | 7  |
| 17 | 2111.011383        | 1056.009329     | 2093.984834    | 1047.496055      | 2093.000818        | 1047.004047      | I    | <b>701.394064</b>  | 351.200670         | 684.367515     | 342.687396       | 683.383499         | 342.195388       | 6  |
| 18 | 2182.048497        | 1091.527886     | 2165.021948    | 1083.014612      | 2164.037932        | 1082.522604      | A    | <b>588.310000</b>  | 294.658638         | 571.283451     | 286.145364       | 570.299435         | 285.653356       | 5  |
| 19 | 2296.091424        | 1148.549350     | 2279.064875    | 1140.036075      | 2278.080859        | 1139.544067      | N    | <b>517.272886</b>  | 259.140081         | 500.246337     | 250.626806       | 499.262321         | 250.134798       | 4  |
| 20 | 2395.159838        | 1198.083557     | 2378.133289    | 1189.570282      | 2377.149273        | 1189.078274      | V    | 403.229959         | 202.118617         | 386.203410     | 193.605343       | 385.219394         | 193.113335       | 3  |
| 21 | 2524.202431        | 1262.604853     | 2507.175882    | 1254.091579      | 2506.191866        | 1253.599571      | E    | 304.161545         | 152.584411         | 287.134996     | 144.071136       | 286.150980         | 143.579128       | 2  |
| 22 |                    |                 |                |                  |                    |                  | R    | <b>175.118952</b>  | 88.063114          | 158.092403     | 79.549839        |                    |                  | 1  |

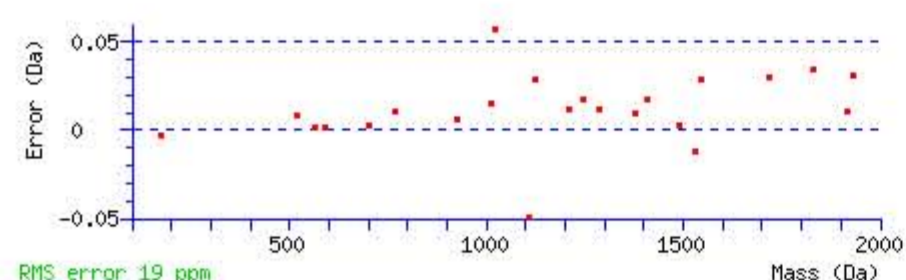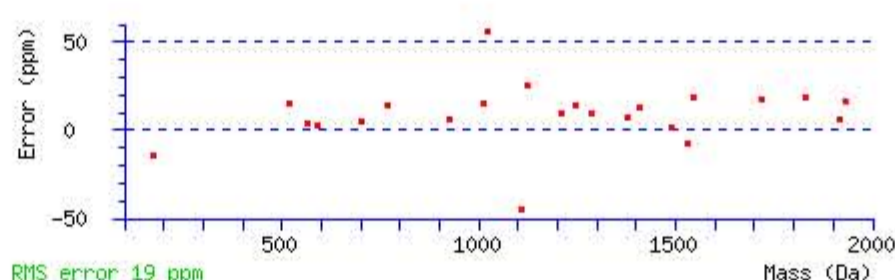

NCBI BLAST search of **DPDQTDGLGLSYLSSHIANVER**  
 (Parameters: blastp, nr protein database, expect=20000, no filter, PAM30)  
 Other BLAST [web gateways](#)

**All matches to this query**

| Score | Mr(calc):   | Delta    | Sequence                      |
|-------|-------------|----------|-------------------------------|
| 102.8 | 2697.306824 | 0.031618 | <b>DPDQTDGLGLSYLSSHIANVER</b> |

# MASCOT Search Results

## Peptide View

MS/MS Fragmentation of **VPFDAQTLHTSTAMAAQHGMDDDDGTGQK**  
 Found in **GELS\_HUMAN**, Gelsolin OS=Homo sapiens GN=GSN PE=1 SV=1

Match to Query 55377: 3183.462856 from(796.872990,4+) rtinseconds(2018) index(5045)  
 Title: Locus:1.1.1.3222.23 File:"2013-07-02 CLN FXIII 180 min 3rd F 1.wiff"  
 Data file C:\Program Files (x86)\Matrix Science\Mascot Daemon\mgf9 FXIII 180 min 3rd\mascot\_daemon\_merge.mgf

Click mouse within plot area to zoom in by factor of two about that point  
 Or, Plot from  to  Da   
 Label all possible matches  Label matches used for scoring

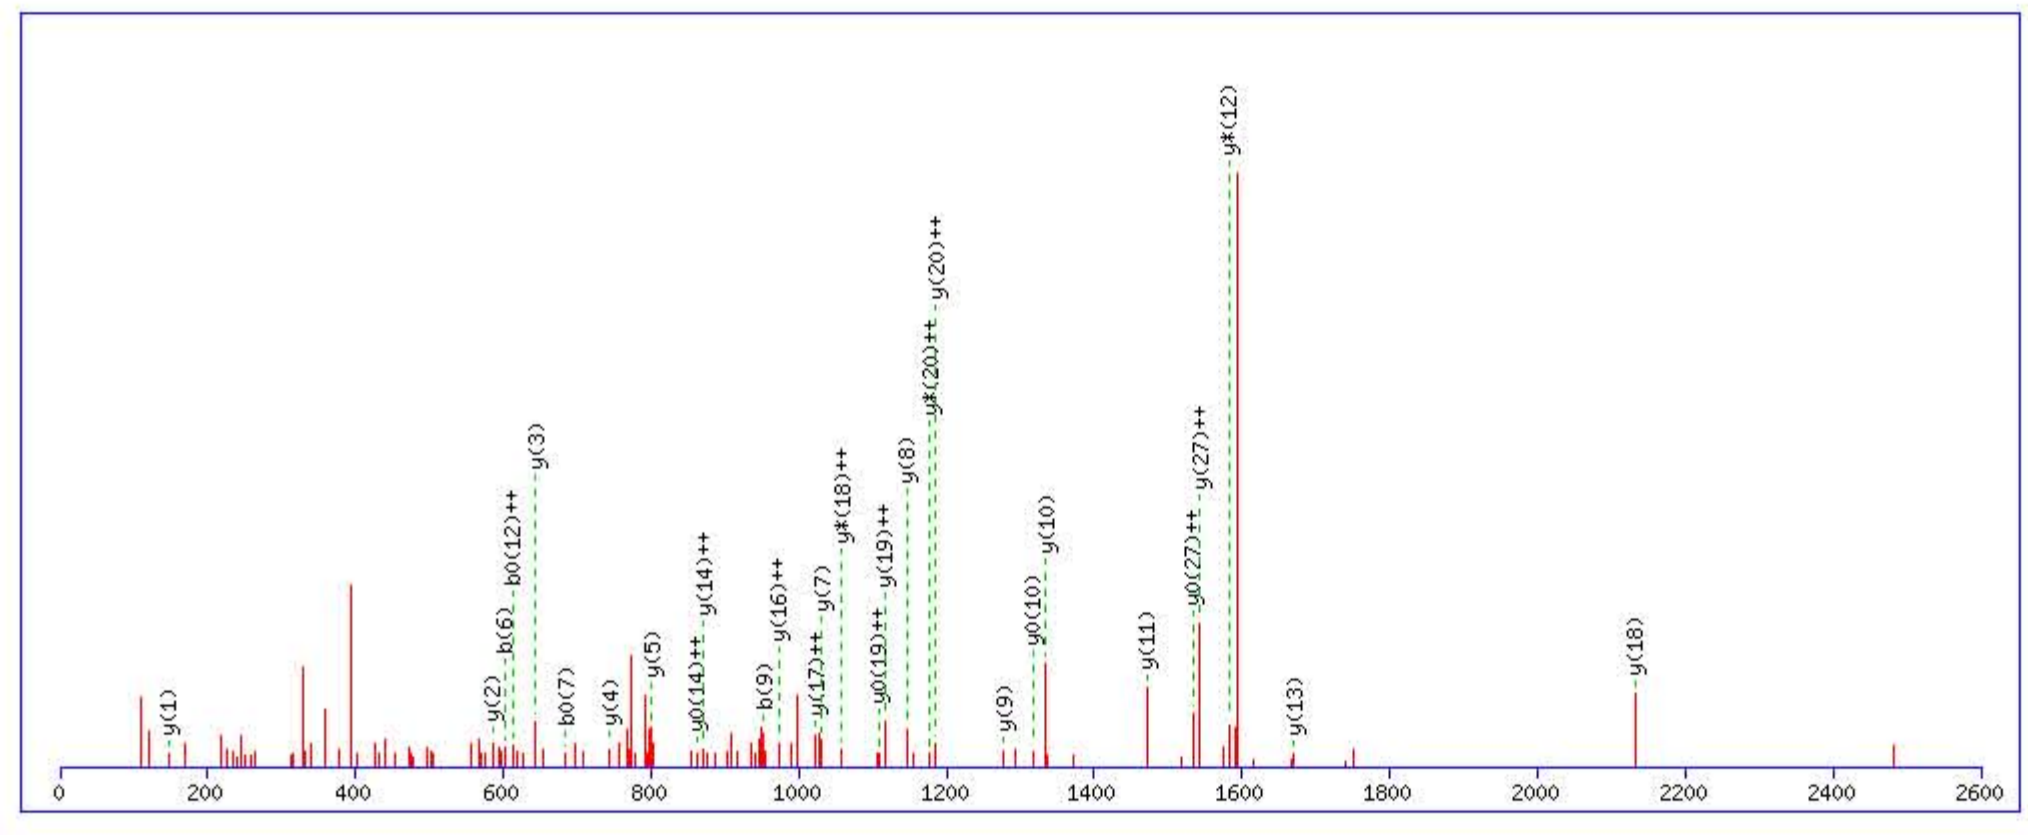

Monoisotopic mass of neutral peptide Mr(calc): 3183.442383  
 Fixed modifications: Carbamidomethyl (C) (apply to specified residues or termini only)  
 Variable modifications:  
 Q27 : Biotin:Thermo-21345 (Q)  
 Ions Score: 35 Expect: 0.0044  
 Matches : 29/280 fragment ions using 105 most intense peaks [\(help\)](#)

| #  | b           | b <sup>++</sup> | b <sup>*</sup> | b <sup>*++</sup> | b <sup>0</sup> | b <sup>0++</sup> | Seq. | y           | y <sup>++</sup> | y <sup>*</sup> | y <sup>*++</sup> | y <sup>0</sup> | y <sup>0++</sup> | #  |
|----|-------------|-----------------|----------------|------------------|----------------|------------------|------|-------------|-----------------|----------------|------------------|----------------|------------------|----|
| 1  | 100.075690  | 50.541483       |                |                  |                |                  | V    |             |                 |                |                  |                |                  | 28 |
| 2  | 197.128454  | 99.067865       |                |                  |                |                  | P    | 3085.381222 | 1543.194249     | 3068.354673    | 1534.680974      | 3067.370657    | 1534.188966      | 27 |
| 3  | 344.196868  | 172.602072      |                |                  |                |                  | F    | 2988.328458 | 1494.667867     | 2971.301909    | 1486.154592      | 2970.317893    | 1485.662584      | 26 |
| 4  | 459.223811  | 230.115543      |                |                  | 441.213246     | 221.110261       | D    | 2841.260044 | 1421.133660     | 2824.233495    | 1412.620385      | 2823.249479    | 1412.128377      | 25 |
| 5  | 530.260925  | 265.634101      |                |                  | 512.250360     | 256.628818       | A    | 2726.233101 | 1363.620188     | 2709.206552    | 1355.106914      | 2708.222536    | 1354.614906      | 24 |
| 6  | 601.298039  | 301.152658      |                |                  | 583.287474     | 292.147375       | A    | 2655.195987 | 1328.101631     | 2638.169438    | 1319.588357      | 2637.185422    | 1319.096349      | 23 |
| 7  | 702.345718  | 351.676497      |                |                  | 684.335153     | 342.671215       | T    | 2584.158873 | 1292.583074     | 2567.132324    | 1284.069800      | 2566.148308    | 1283.577792      | 22 |
| 8  | 815.429782  | 408.218529      |                |                  | 797.419217     | 399.213247       | L    | 2483.111194 | 1242.059235     | 2466.084645    | 1233.545960      | 2465.100629    | 1233.053952      | 21 |
| 9  | 952.488694  | 476.747985      |                |                  | 934.478129     | 467.742703       | H    | 2370.027130 | 1185.517203     | 2353.000581    | 1177.003928      | 2352.016565    | 1176.511920      | 20 |
| 10 | 1053.536373 | 527.271824      |                |                  | 1035.525808    | 518.266542       | T    | 2232.968218 | 1116.987747     | 2215.941669    | 1108.474472      | 2214.957653    | 1107.982464      | 19 |
| 11 | 1140.568401 | 570.787839      |                |                  | 1122.557836    | 561.782556       | S    | 2131.920539 | 1066.463907     | 2114.893990    | 1057.950633      | 2113.909974    | 1057.458625      | 18 |
| 12 | 1241.616080 | 621.311678      |                |                  | 1223.605515    | 612.306396       | T    | 2044.888511 | 1022.947893     | 2027.861962    | 1014.434619      | 2026.877946    | 1013.942611      | 17 |
| 13 | 1312.653194 | 656.830235      |                |                  | 1294.642629    | 647.824952       | A    | 1943.840832 | 972.424054      | 1926.814283    | 963.910779       | 1925.830267    | 963.418771       | 16 |
| 14 | 1443.693679 | 722.350478      |                |                  | 1425.683114    | 713.345195       | M    | 1872.803718 | 936.905497      | 1855.777169    | 928.392222       | 1854.793153    | 927.900214       | 15 |
| 15 | 1514.730793 | 757.869035      |                |                  | 1496.720228    | 748.863752       | A    | 1741.763233 | 871.385254      | 1724.736684    | 862.871980       | 1723.752668    | 862.379972       | 14 |
| 16 | 1585.767907 | 793.387591      |                |                  | 1567.757342    | 784.382309       | A    | 1670.726119 | 835.866697      | 1653.699570    | 827.353423       | 1652.715554    | 826.861415       | 13 |
| 17 | 1713.826485 | 857.416880      | 1696.799936    | 848.903606       | 1695.815920    | 848.411598       | Q    | 1599.689005 | 800.348140      | 1582.662456    | 791.834866       | 1581.678440    | 791.342858       | 12 |
| 18 | 1850.885397 | 925.946336      | 1833.858848    | 917.433062       | 1832.874832    | 916.941054       | H    | 1471.630427 | 736.318851      | 1454.603878    | 727.805577       | 1453.619862    | 727.313569       | 11 |
| 19 | 1907.906861 | 954.457068      | 1890.880312    | 945.943794       | 1889.896296    | 945.451786       | G    | 1334.571515 | 667.789395      | 1317.544966    | 659.276121       | 1316.560950    | 658.784113       | 10 |
| 20 | 2038.947346 | 1019.977311     | 2021.920797    | 1011.464036      | 2020.936781    | 1010.972028      | M    | 1277.550051 | 639.278663      | 1260.523502    | 630.765389       | 1259.539486    | 630.273381       | 9  |
| 21 | 2153.974289 | 1077.490782     | 2136.947740    | 1068.977508      | 2135.963724    | 1068.485500      | D    | 1146.509566 | 573.758421      | 1129.483017    | 565.245146       | 1128.499001    | 564.753138       | 8  |
| 22 | 2269.001232 | 1135.004254     | 2251.974683    | 1126.490979      | 2250.990667    | 1125.998971      | D    | 1031.482623 | 516.244949      | 1014.456074    | 507.731675       | 1013.472058    | 507.239667       | 7  |
| 23 | 2384.028175 | 1192.517725     | 2367.001626    | 1184.004451      | 2366.017610    | 1183.512443      | D    | 916.455680  | 458.731478      | 899.429131     | 450.218203       | 898.445115     | 449.726195       | 6  |
| 24 | 2441.049639 | 1221.028457     | 2424.023090    | 1212.515183      | 2423.039074    | 1212.023175      | G    | 801.428737  | 401.218007      | 784.402188     | 392.704732       | 783.418172     | 392.212724       | 5  |
| 25 | 2542.097318 | 1271.552297     | 2525.070769    | 1263.039022      | 2524.086753    | 1262.547014      | T    | 744.407273  | 372.707275      | 727.380724     | 364.194000       | 726.396708     | 363.701992       | 4  |
| 26 | 2599.118782 | 1300.063029     | 2582.092233    | 1291.549754      | 2581.108217    | 1291.057746      | G    | 643.359594  | 322.183435      | 626.333045     | 313.670161       |                |                  | 3  |
| 27 | 3038.344108 | 1519.675692     | 3021.317559    | 1511.162417      | 3020.333543    | 1510.670409      | Q    | 586.338130  | 293.672703      | 569.311581     | 285.159429       |                |                  | 2  |
| 28 |             |                 |                |                  |                |                  | K    | 147.112804  | 74.060040       | 130.086255     | 65.546765        |                |                  | 1  |

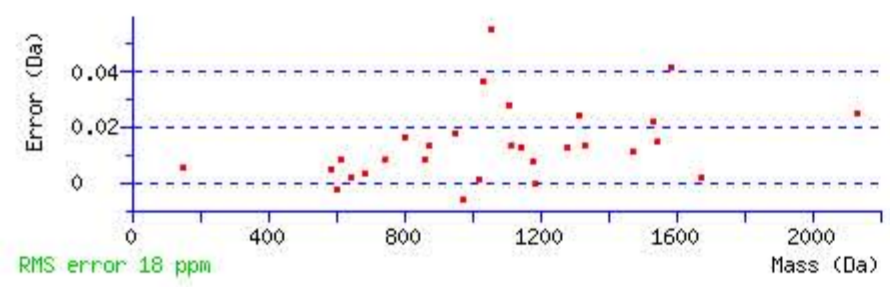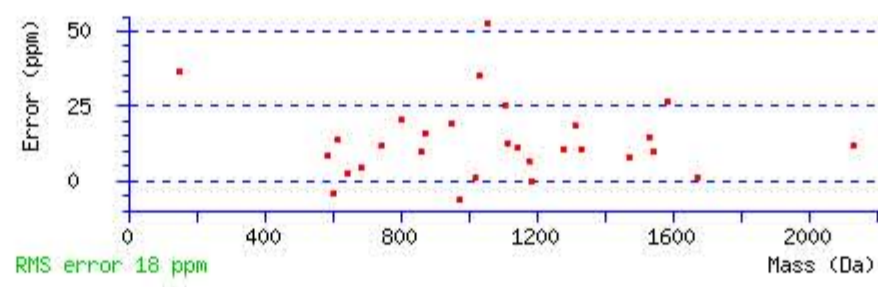

NCBI BLAST search of **VPFDAQTLHTSTAMAAQHGMDDDDGTGQK**  
 (Parameters: blastp, nr protein database, expect=20000, no filter, PAM30)  
 Other BLAST [web gateways](#)

### All matches to this query

| Score | Mr(calc):   | Delta    | Sequence                                      |
|-------|-------------|----------|-----------------------------------------------|
| 34.7  | 3183.442383 | 0.020473 | <a href="#">VPFDAQTLHTSTAMAAQHGMDDDDGTGQK</a> |
| 6.8   | 3183.442383 | 0.020473 | <a href="#">VPFDAQTLHTSTAMAAQHGMDDDDGTGQK</a> |

Mascot: <http://www.matrixscience.com/>

**MATRIX SCIENCE Mascot Search Results**

**Peptide View**

MS/MS Fragmentation of **VIHDNFGIVEGLMTTVHAITATQK**  
 Found in **G3P\_HUMAN**, Glyceraldehyde-3-phosphate dehydrogenase OS=Homo sapiens GN=GAPDH PE=1 SV=3

Match to Query 53060: 2905.532696 from(727.390450,4+) rtinseconds(3130) index(53064)  
 Title: Locus:1.1.1.3798.8 File:"2013-07-02 CLN FXIII 180 min 3rd F 4.wiff"  
 Data file C:\Program Files (x86)\Matrix Science\Mascot Daemon\mgf\9 FXIII 180 min 3rd\mascot\_daemon\_merge.mgf

Click mouse within plot area to zoom in by factor of two about that point  
 Or, Plot from  to  Da   
 Label all possible matches  Label matches used for scoring

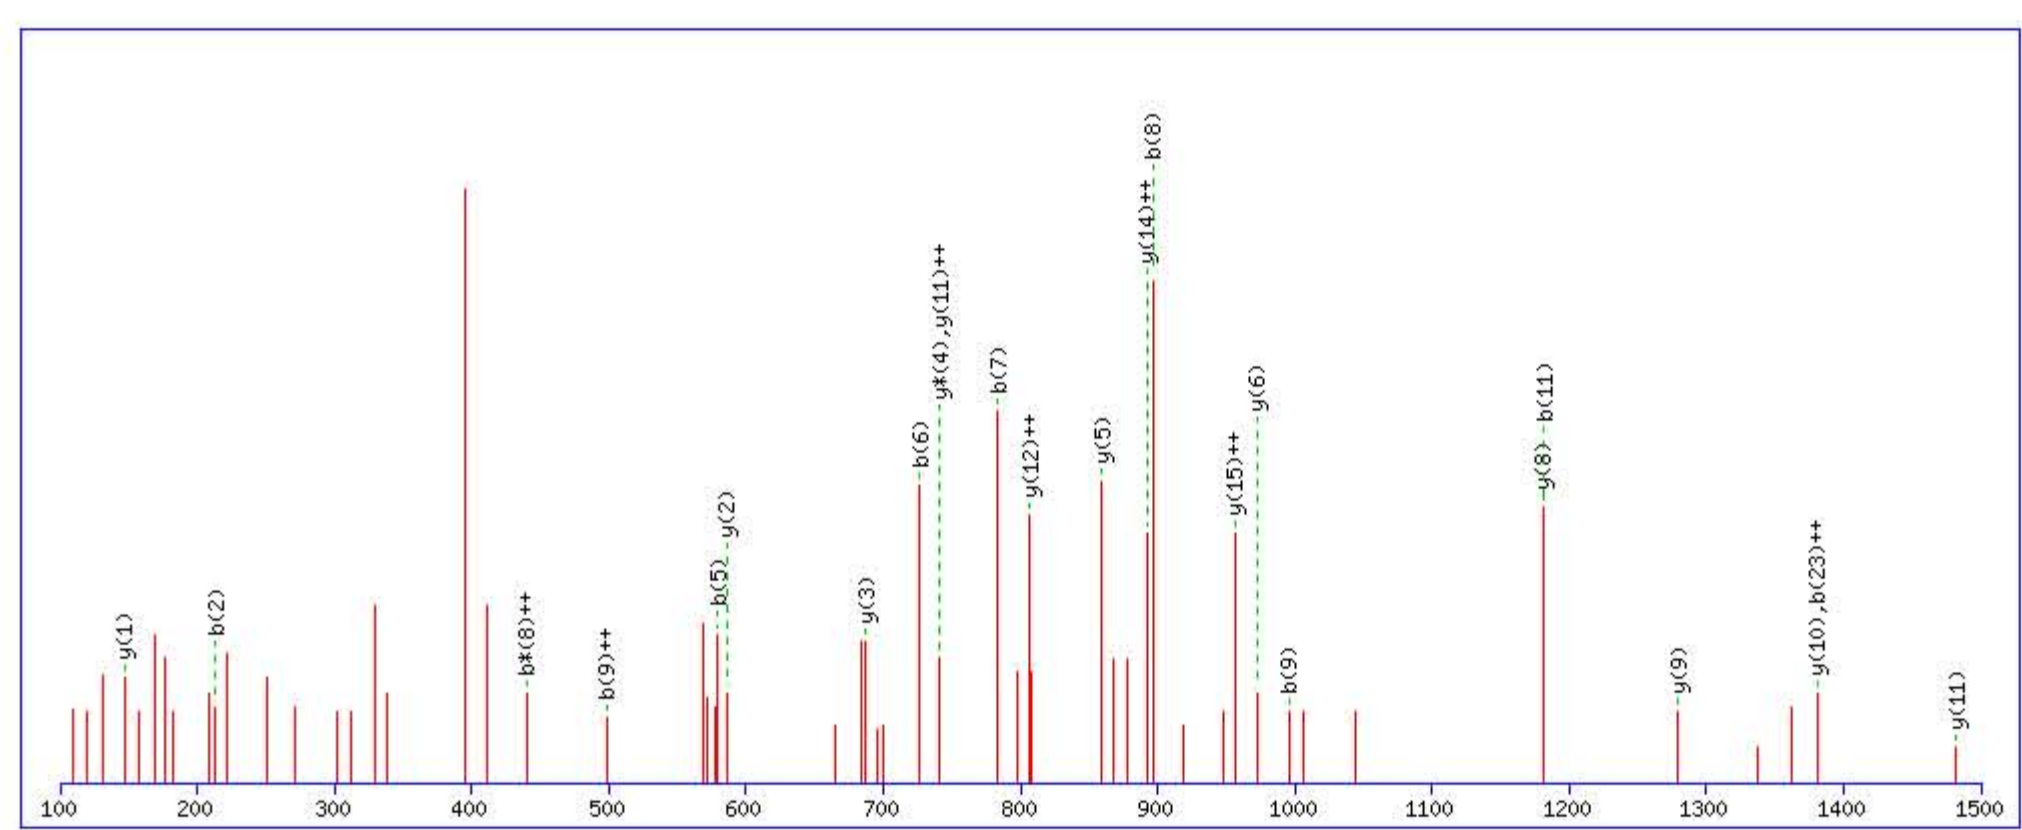

Monoisotopic mass of neutral peptide  $M_r(\text{calc})$ : 2905.519424  
 Fixed modifications: Carbamidomethyl (C) (apply to specified residues or termini only)  
 Variable modifications:  
 Q23 : Biotin:Thermo-21345 (Q)  
 Ions Score: 52 Expect: 0.00013  
 Matches : 24/258 fragment ions using 44 most intense peaks [\(help\)](#)

| #  | b                  | b <sup>++</sup>    | b <sup>*</sup> | b <sup>*++</sup>  | b <sup>0</sup> | b <sup>0++</sup> | Seq. | y                  | y <sup>++</sup>   | y <sup>*</sup>    | y <sup>*++</sup> | y <sup>0</sup> | y <sup>0++</sup> | #  |
|----|--------------------|--------------------|----------------|-------------------|----------------|------------------|------|--------------------|-------------------|-------------------|------------------|----------------|------------------|----|
| 1  | 100.075690         | 50.541483          |                |                   |                |                  | V    |                    |                   |                   |                  |                |                  | 24 |
| 2  | <b>213.159754</b>  | 107.083515         |                |                   |                |                  | I    | 2807.458272        | 1404.232774       | 2790.431723       | 1395.719499      | 2789.447707    | 1395.227491      | 23 |
| 3  | 350.218666         | 175.612971         |                |                   |                |                  | H    | 2694.374208        | 1347.690742       | 2677.347659       | 1339.177467      | 2676.363643    | 1338.685459      | 22 |
| 4  | 465.245609         | 233.126443         |                |                   | 447.235044     | 224.121160       | D    | 2557.315296        | 1279.161286       | 2540.288747       | 1270.648011      | 2539.304731    | 1270.156003      | 21 |
| 5  | <b>579.288536</b>  | 290.147906         | 562.261987     | 281.634632        | 561.277971     | 281.142624       | N    | 2442.288353        | 1221.647814       | 2425.261804       | 1213.134540      | 2424.277788    | 1212.642532      | 20 |
| 6  | <b>726.356950</b>  | 363.682113         | 709.330401     | 355.168838        | 708.346385     | 354.676830       | F    | 2328.245426        | 1164.626351       | 2311.218877       | 1156.113076      | 2310.234861    | 1155.621068      | 19 |
| 7  | <b>783.378414</b>  | 392.192845         | 766.351865     | 383.679571        | 765.367849     | 383.187563       | G    | 2181.177012        | 1091.092144       | 2164.150463       | 1082.578869      | 2163.166447    | 1082.086861      | 18 |
| 8  | <b>896.462478</b>  | 448.734877         | 879.435929     | <b>440.221603</b> | 878.451913     | 439.729595       | I    | 2124.155548        | 1062.581412       | 2107.128999       | 1054.068137      | 2106.144983    | 1053.576129      | 17 |
| 9  | <b>995.530892</b>  | <b>498.269084</b>  | 978.504343     | 489.755810        | 977.520327     | 489.263802       | V    | 2011.071484        | 1006.039380       | 1994.044935       | 997.526105       | 1993.060919    | 997.034097       | 16 |
| 10 | 1124.573485        | 562.790381         | 1107.546936    | 554.277106        | 1106.562920    | 553.785098       | E    | 1912.003070        | <b>956.505173</b> | 1894.976521       | 947.991899       | 1893.992505    | 947.499890       | 15 |
| 11 | <b>1181.594949</b> | 591.301113         | 1164.568400    | 582.787838        | 1163.584384    | 582.295830       | G    | 1782.960477        | <b>891.983876</b> | 1765.933928       | 883.470602       | 1764.949912    | 882.978594       | 14 |
| 12 | 1294.679013        | 647.843144         | 1277.652464    | 639.329870        | 1276.668448    | 638.837862       | L    | 1725.939013        | 863.473144        | 1708.912464       | 854.959870       | 1707.928448    | 854.467862       | 13 |
| 13 | 1425.719498        | 713.363387         | 1408.692949    | 704.850113        | 1407.708933    | 704.358104       | M    | 1612.854949        | <b>806.931113</b> | 1595.828400       | 798.417838       | 1594.844384    | 797.925830       | 12 |
| 14 | 1526.767177        | 763.887227         | 1509.740628    | 755.373952        | 1508.756612    | 754.881944       | T    | <b>1481.814464</b> | <b>741.410870</b> | 1464.787915       | 732.897596       | 1463.803899    | 732.405588       | 11 |
| 15 | 1627.814856        | 814.411066         | 1610.788307    | 805.897792        | 1609.804291    | 805.405783       | T    | <b>1380.766785</b> | 690.887031        | 1363.740236       | 682.373756       | 1362.756220    | 681.881748       | 10 |
| 16 | 1726.883270        | 863.945273         | 1709.856721    | 855.431999        | 1708.872705    | 854.939991       | V    | <b>1279.719106</b> | 640.363191        | 1262.692557       | 631.849917       | 1261.708541    | 631.357909       | 9  |
| 17 | 1863.942182        | 932.474729         | 1846.915633    | 923.961455        | 1845.931617    | 923.469447       | H    | <b>1180.650692</b> | 590.828984        | 1163.624143       | 582.315710       | 1162.640127    | 581.823701       | 8  |
| 18 | 1934.979296        | 967.993286         | 1917.952747    | 959.480012        | 1916.968731    | 958.988003       | A    | 1043.591780        | 522.299528        | 1026.565231       | 513.786254       | 1025.581215    | 513.294245       | 7  |
| 19 | 2048.063360        | 1024.535318        | 2031.036811    | 1016.022044       | 2030.052795    | 1015.530036      | I    | <b>972.554666</b>  | 486.780971        | 955.528117        | 478.267697       | 954.544101     | 477.775689       | 6  |
| 20 | 2149.111039        | 1075.059157        | 2132.084490    | 1066.545883       | 2131.100474    | 1066.053875      | T    | <b>859.470602</b>  | 430.238939        | 842.444053        | 421.725665       | 841.460037     | 421.233657       | 5  |
| 21 | 2220.148153        | 1110.577714        | 2203.121604    | 1102.064440       | 2202.137588    | 1101.572432      | A    | 758.422923         | 379.715100        | <b>741.396374</b> | 371.201825       | 740.412358     | 370.709817       | 4  |
| 22 | 2321.195832        | 1161.101554        | 2304.169283    | 1152.588279       | 2303.185267    | 1152.096271      | T    | <b>687.385809</b>  | 344.196543        | 670.359260        | 335.683268       | 669.375244     | 335.191260       | 3  |
| 23 | 2760.421158        | <b>1380.714217</b> | 2743.394609    | 1372.200942       | 2742.410593    | 1371.708934      | Q    | <b>586.338130</b>  | 293.672703        | 569.311581        | 285.159429       |                |                  | 2  |
| 24 |                    |                    |                |                   |                |                  | K    | <b>147.112804</b>  | 74.060040         | 130.086255        | 65.546765        |                |                  | 1  |

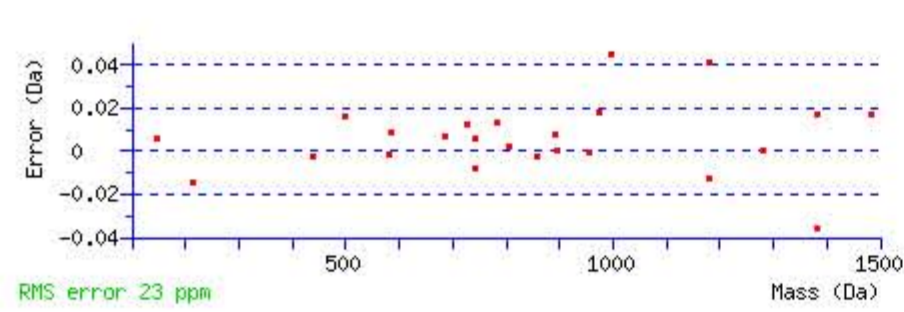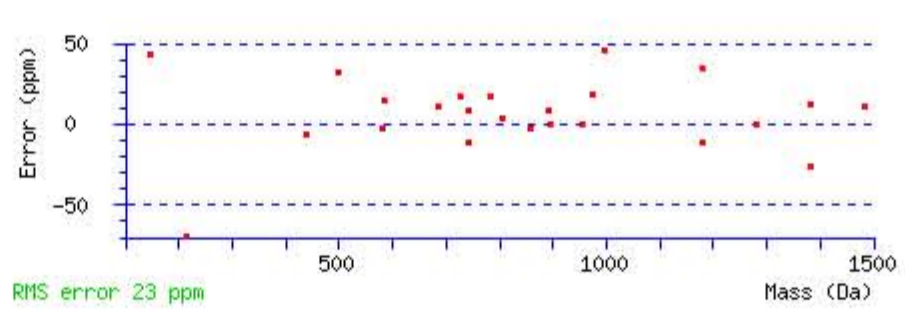

NCBI BLAST search of **VIHDNFGIVEGLMTTVHAITATQK**  
 (Parameters: blastp, nr protein database, expect=20000, no filter, PAM30)  
 Other BLAST [web gateways](#)

**All matches to this query**

| Score | $M_r(\text{calc})$ : | Delta    | Sequence                                 |
|-------|----------------------|----------|------------------------------------------|
| 52.0  | 2905.519424          | 0.013272 | <a href="#">VIHDNFGIVEGLMTTVHAITATQK</a> |

# MASCOT Search Results

## Peptide View

MS/MS Fragmentation of **YVMLPVADQDQCIR**

Found in **HPT\_HUMAN**, Haptoglobin OS=Homo sapiens GN=HP PE=1 SV=1

Match to Query 40169: 2018.005028 from(1010.009790,2+) rtinseconds(2336) index(6725)

Title: Locus:1.1.1.3333.11 File:"2013-07-02 CLN FXIII 180 min 3rd F 1.wiff"

Data file C:\Program Files (x86)\Matrix Science\Mascot Daemon\mgf9 FXIII 180 min 3rd\mascot\_daemon\_merge.mgf

Click mouse within plot area to zoom in by factor of two about that point

Or, Plot from  to  Da

Label all possible matches  Label matches used for scoring

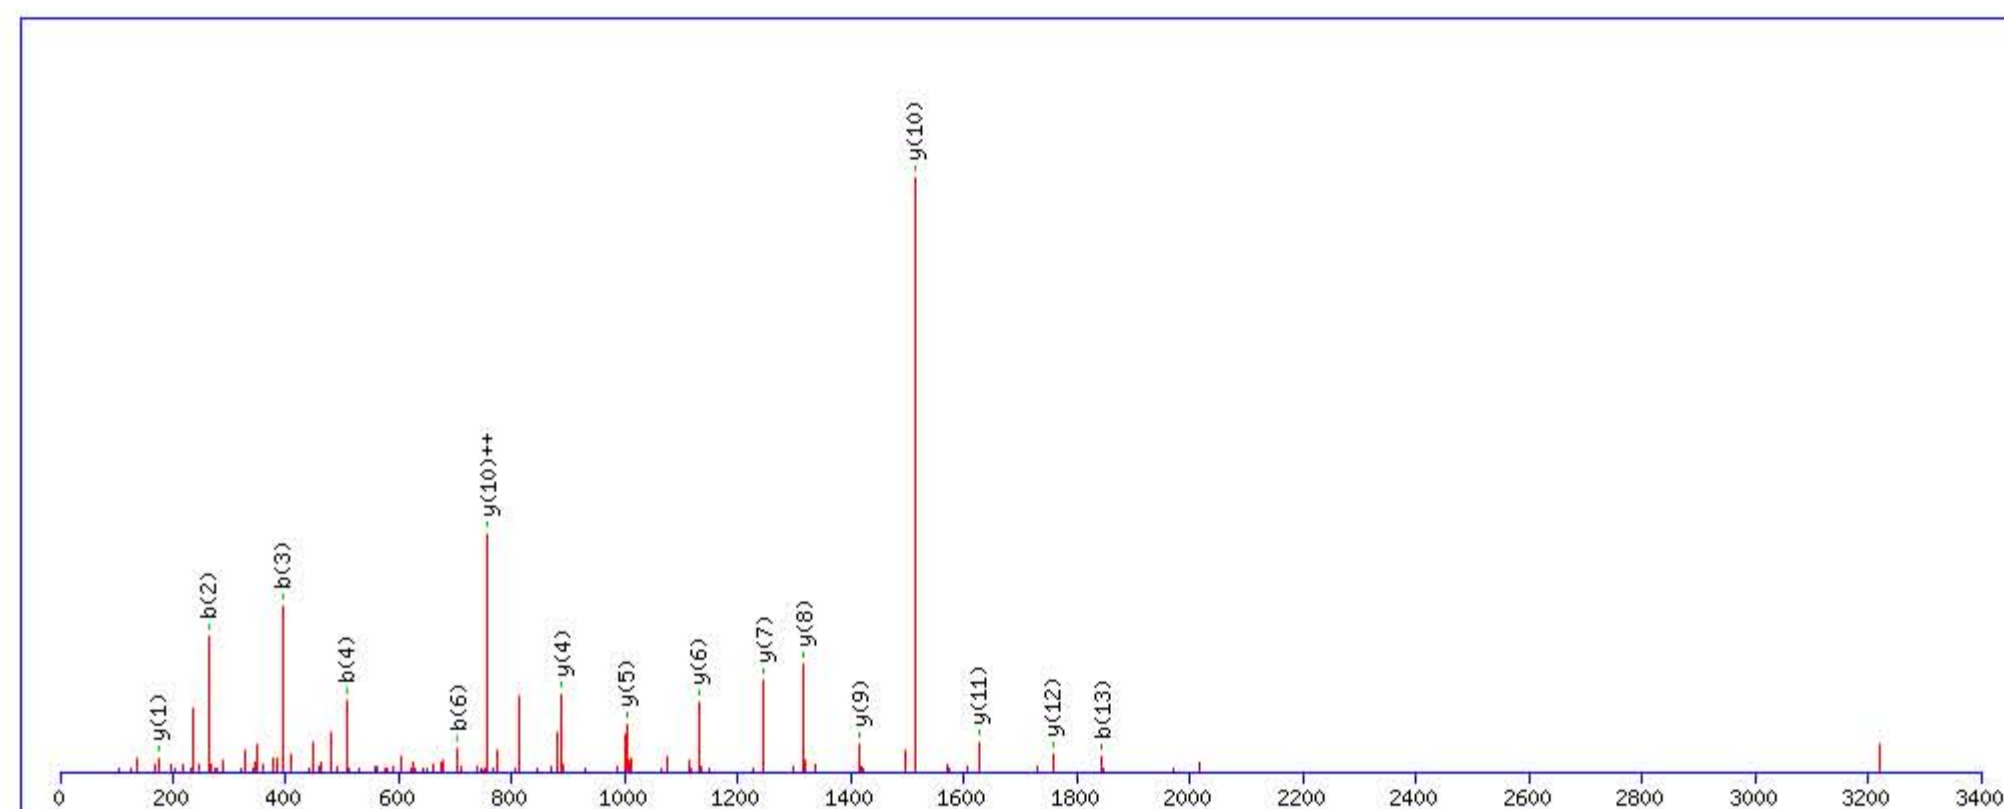

Monoisotopic mass of neutral peptide Mr(calc): 2017.978760

Fixed modifications: Carbamidomethyl (C) (apply to specified residues or termini only)

Variable modifications:

Q11 : Biotin:Thermo-21345 (Q)

Ions Score: 85 Expect: 1.3e-008

Matches : 16/118 fragment ions using 19 most intense peaks [\(help\)](#)

| #  | b                  | b <sup>++</sup> | b <sup>*</sup> | b <sup>*++</sup> | b <sup>0</sup> | b <sup>0++</sup> | Seq. | y                  | y <sup>++</sup>   | y <sup>*</sup> | y <sup>*++</sup> | y <sup>0</sup> | y <sup>0++</sup> | #  |
|----|--------------------|-----------------|----------------|------------------|----------------|------------------|------|--------------------|-------------------|----------------|------------------|----------------|------------------|----|
| 1  | 164.070605         | 82.538940       |                |                  |                |                  | Y    |                    |                   |                |                  |                |                  | 14 |
| 2  | <b>263.139019</b>  | 132.073148      |                |                  |                |                  | V    | 1855.922710        | 928.464993        | 1838.896161    | 919.951719       | 1837.912145    | 919.459711       | 13 |
| 3  | <b>394.179504</b>  | 197.593390      |                |                  |                |                  | M    | <b>1756.854296</b> | 878.930786        | 1739.827747    | 870.417512       | 1738.843731    | 869.925504       | 12 |
| 4  | <b>507.263568</b>  | 254.135422      |                |                  |                |                  | L    | <b>1625.813811</b> | 813.410544        | 1608.787262    | 804.897269       | 1607.803246    | 804.405261       | 11 |
| 5  | 604.316332         | 302.661804      |                |                  |                |                  | P    | <b>1512.729747</b> | <b>756.868512</b> | 1495.703198    | 748.355237       | 1494.719182    | 747.863229       | 10 |
| 6  | <b>703.384746</b>  | 352.196011      |                |                  |                |                  | V    | <b>1415.676983</b> | 708.342130        | 1398.650434    | 699.828855       | 1397.666418    | 699.336847       | 9  |
| 7  | 774.421860         | 387.714568      |                |                  |                |                  | A    | <b>1316.608569</b> | 658.807923        | 1299.582020    | 650.294648       | 1298.598004    | 649.802640       | 8  |
| 8  | 889.448803         | 445.228040      |                |                  | 871.438238     | 436.222757       | D    | <b>1245.571455</b> | 623.289366        | 1228.544906    | 614.776091       | 1227.560890    | 614.284083       | 7  |
| 9  | 1017.507381        | 509.257329      | 1000.480832    | 500.744054       | 999.496816     | 500.252046       | Q    | <b>1130.544512</b> | 565.775894        | 1113.517963    | 557.262620       | 1112.533947    | 556.770612       | 6  |
| 10 | 1132.534324        | 566.770800      | 1115.507775    | 558.257526       | 1114.523759    | 557.765517       | D    | <b>1002.485934</b> | 501.746605        | 985.459385     | 493.233331       | 984.475369     | 492.741323       | 5  |
| 11 | 1571.759650        | 786.383463      | 1554.733101    | 777.870189       | 1553.749085    | 777.378181       | Q    | <b>887.458991</b>  | 444.233134        | 870.432442     | 435.719859       |                |                  | 4  |
| 12 | 1731.790299        | 866.398788      | 1714.763750    | 857.885513       | 1713.779734    | 857.393505       | C    | 448.233665         | 224.620470        | 431.207116     | 216.107196       |                |                  | 3  |
| 13 | <b>1844.874363</b> | 922.940820      | 1827.847814    | 914.427545       | 1826.863798    | 913.935537       | I    | 288.203016         | 144.605146        | 271.176467     | 136.091871       |                |                  | 2  |
| 14 |                    |                 |                |                  |                |                  | R    | <b>175.118952</b>  | 88.063114         | 158.092403     | 79.549839        |                |                  | 1  |

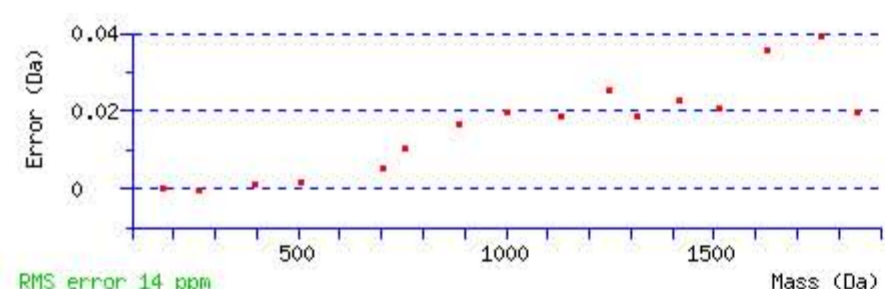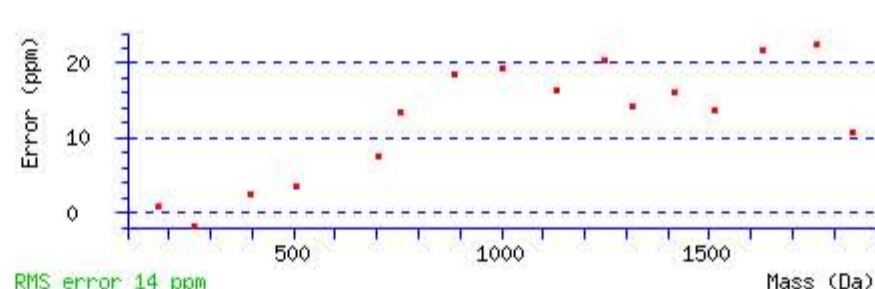

NCBI BLAST search of **YVMLPVADQDQCIR**

(Parameters: blastp, nr protein database, expect=20000, no filter, PAM30)

Other BLAST [web gateways](#)

All matches to this query

| Score | Mr(calc):   | Delta    | Sequence                           |
|-------|-------------|----------|------------------------------------|
| 84.6  | 2017.978760 | 0.026268 | <a href="#">YVMLPVADQDQCIR</a>     |
| 55.6  | 2017.978760 | 0.026268 | <a href="#">YVMLPVADQDQCIR</a>     |
| 0.5   | 2017.977875 | 0.027153 | <a href="#">ITLTDLFENAYGSSMKGR</a> |

Mascot: <http://www.matrixscience.com/>

# MASCOT Search Results

## Peptide View

MS/MS Fragmentation of **YVMLPVADQYDCITHYEGSTCPK**  
 Found in **HPTR\_HUMAN**, Haptoglobin-related protein OS=Homo sapiens GN=HPR PE=1 SV=2

Match to Query 54426: 3057.368096 from(765.349300,4+) rtinseconds(2469) index(34376)  
 Title: Locus:1.1.1.3523.9 File:"2013-07-02 CLN FXIII 180 min 3rd F 3.wiff"  
 Data file C:\Program Files (x86)\Matrix Science\Mascot Daemon\mgf9 FXIII 180 min 3rd\mascot\_daemon\_merge.mgf

Click mouse within plot area to zoom in by factor of two about that point  
 Or, Plot from  to  Da   
 Label all possible matches  Label matches used for scoring

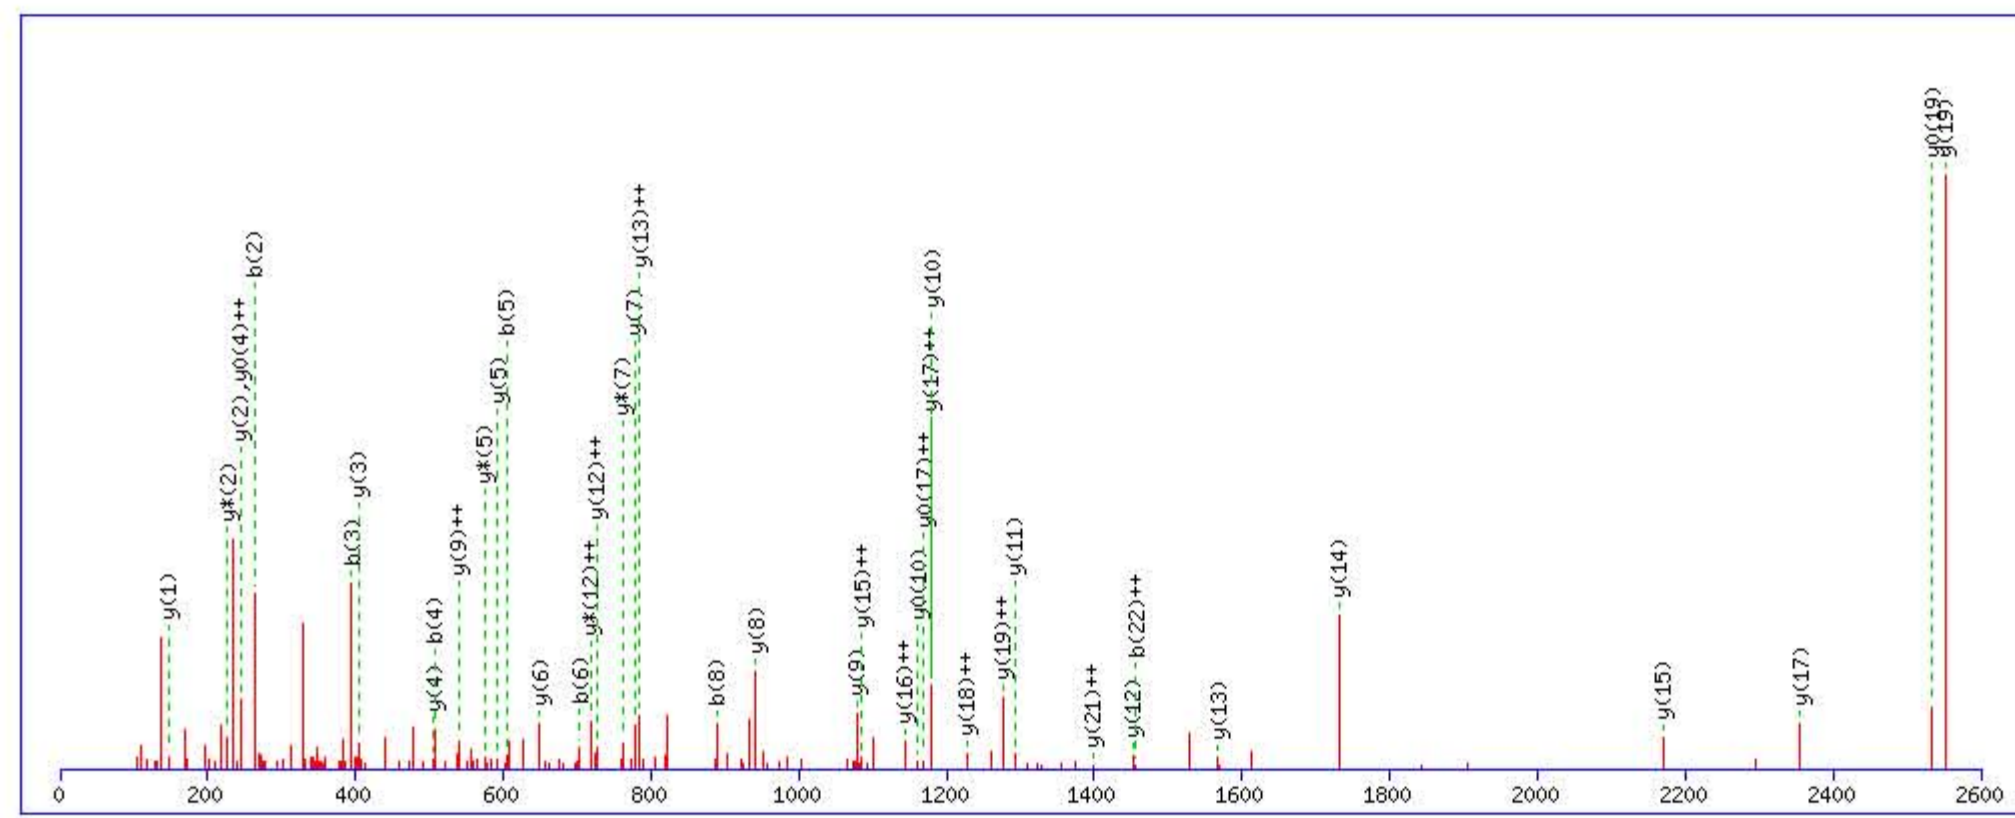

Monoisotopic mass of neutral peptide Mr(calc): 3057.374466  
 Fixed modifications: Carbamidomethyl (C) (apply to specified residues or termini only)  
 Variable modifications:  
 Q9 : Biotin:Thermo-21345 (Q)  
 Ions Score: 71 Expect: 5.7e-007  
 Matches : 41/228 fragment ions using 104 most intense peaks [\(help\)](#)

| #  | b                 | b <sup>++</sup>    | b <sup>*</sup> | b <sup>*++</sup> | b <sup>0</sup> | b <sup>0++</sup> | Seq. | y                  | y <sup>++</sup>    | y <sup>*</sup>    | y <sup>*++</sup>  | y <sup>0</sup>     | y <sup>0++</sup>   | #  |
|----|-------------------|--------------------|----------------|------------------|----------------|------------------|------|--------------------|--------------------|-------------------|-------------------|--------------------|--------------------|----|
| 1  | 164.070605        | 82.538940          |                |                  |                |                  | Y    |                    |                    |                   |                   |                    |                    | 23 |
| 2  | <b>263.139019</b> | 132.073148         |                |                  |                |                  | V    | 2895.318410        | 1448.162843        | 2878.291861       | 1439.649568       | 2877.307845        | 1439.157560        | 22 |
| 3  | <b>394.179504</b> | 197.593390         |                |                  |                |                  | M    | 2796.249996        | <b>1398.628636</b> | 2779.223447       | 1390.115361       | 2778.239431        | 1389.623353        | 21 |
| 4  | <b>507.263568</b> | 254.135422         |                |                  |                |                  | L    | 2665.209511        | 1333.108393        | 2648.182962       | 1324.595119       | 2647.198946        | 1324.103111        | 20 |
| 5  | <b>604.316332</b> | 302.661804         |                |                  |                |                  | P    | <b>2552.125447</b> | <b>1276.566361</b> | 2535.098898       | 1268.053087       | <b>2534.114882</b> | 1267.561079        | 19 |
| 6  | <b>703.384746</b> | 352.196011         |                |                  |                |                  | V    | 2455.072683        | <b>1228.039979</b> | 2438.046134       | 1219.526705       | 2437.062118        | 1219.034697        | 18 |
| 7  | 774.421860        | 387.714568         |                |                  |                |                  | A    | <b>2356.004269</b> | <b>1178.505772</b> | 2338.977720       | 1169.992498       | 2337.993704        | <b>1169.500490</b> | 17 |
| 8  | <b>889.448803</b> | 445.228040         |                |                  | 871.438238     | 436.222757       | D    | 2284.967155        | <b>1142.987215</b> | 2267.940606       | 1134.473941       | 2266.956590        | 1133.981933        | 16 |
| 9  | 1328.674129       | 664.840703         | 1311.647580    | 656.327428       | 1310.663564    | 655.835420       | Q    | <b>2169.940212</b> | <b>1085.473744</b> | 2152.913663       | 1076.960469       | 2151.929647        | 1076.468461        | 15 |
| 10 | 1491.737458       | 746.372367         | 1474.710909    | 737.859093       | 1473.726893    | 737.367085       | Y    | <b>1730.714886</b> | 865.861081         | 1713.688337       | 857.347807        | 1712.704321        | 856.855799         | 14 |
| 11 | 1606.764401       | 803.885839         | 1589.737852    | 795.372564       | 1588.753836    | 794.880556       | D    | <b>1567.651557</b> | <b>784.329417</b>  | 1550.625008       | 775.816142        | 1549.640992        | 775.324134         | 13 |
| 12 | 1766.795050       | 883.901163         | 1749.768501    | 875.387889       | 1748.784485    | 874.895881       | C    | <b>1452.624614</b> | <b>726.815945</b>  | 1435.598065       | <b>718.302671</b> | 1434.614049        | 717.810663         | 12 |
| 13 | 1879.879114       | 940.443195         | 1862.852565    | 931.929921       | 1861.868549    | 931.437913       | I    | <b>1292.593965</b> | 646.800621         | 1275.567416       | 638.287346        | 1274.583400        | 637.795338         | 11 |
| 14 | 1980.926793       | 990.967035         | 1963.900244    | 982.453760       | 1962.916228    | 981.961752       | T    | <b>1179.509901</b> | 590.258589         | 1162.483352       | 581.745314        | <b>1161.499336</b> | 581.253306         | 10 |
| 15 | 2117.985705       | 1059.496490        | 2100.959156    | 1050.983216      | 2099.975140    | 1050.491208      | H    | <b>1078.462222</b> | <b>539.734749</b>  | 1061.435673       | 531.221475        | 1060.451657        | 530.729467         | 9  |
| 16 | 2281.049034       | 1141.028155        | 2264.022485    | 1132.514880      | 2263.038469    | 1132.022872      | Y    | <b>941.403310</b>  | 471.205293         | 924.376761        | 462.692018        | 923.392745         | 462.200010         | 8  |
| 17 | 2410.091627       | 1205.549452        | 2393.065078    | 1197.036177      | 2392.081062    | 1196.544169      | E    | <b>778.339981</b>  | 389.673628         | <b>761.313432</b> | 381.160354        | 760.329416         | 380.668346         | 7  |
| 18 | 2467.113091       | 1234.060184        | 2450.086542    | 1225.546909      | 2449.102526    | 1225.054901      | G    | <b>649.297388</b>  | 325.152332         | 632.270839        | 316.639057        | 631.286823         | 316.147049         | 6  |
| 19 | 2554.145119       | 1277.576198        | 2537.118570    | 1269.062923      | 2536.134554    | 1268.570915      | S    | <b>592.275924</b>  | 296.641600         | <b>575.249375</b> | 288.128325        | 574.265359         | 287.636317         | 5  |
| 20 | 2655.192798       | 1328.100037        | 2638.166249    | 1319.586762      | 2637.182233    | 1319.094754      | T    | <b>505.243896</b>  | 253.125586         | 488.217347        | 244.612311        | 487.233331         | <b>244.120303</b>  | 4  |
| 21 | 2815.223447       | 1408.115361        | 2798.196898    | 1399.602087      | 2797.212882    | 1399.110079      | C    | <b>404.196217</b>  | 202.601746         | 387.169668        | 194.088472        |                    |                    | 3  |
| 22 | 2912.276211       | <b>1456.641743</b> | 2895.249662    | 1448.128469      | 2894.265646    | 1447.636461      | P    | <b>244.165568</b>  | 122.586422         | <b>227.139019</b> | 114.073148        |                    |                    | 2  |
| 23 |                   |                    |                |                  |                |                  | K    | <b>147.112804</b>  | 74.060040          | 130.086255        | 65.546765         |                    |                    | 1  |

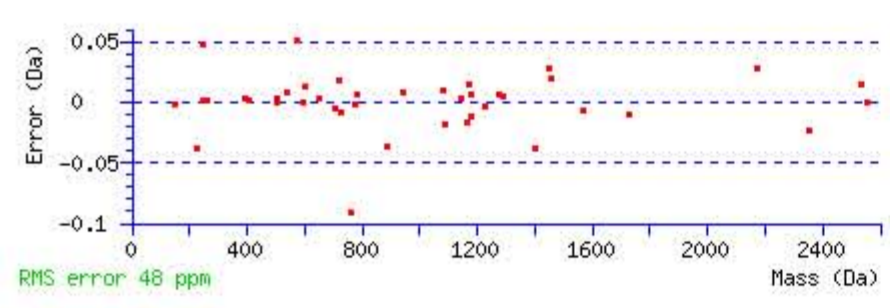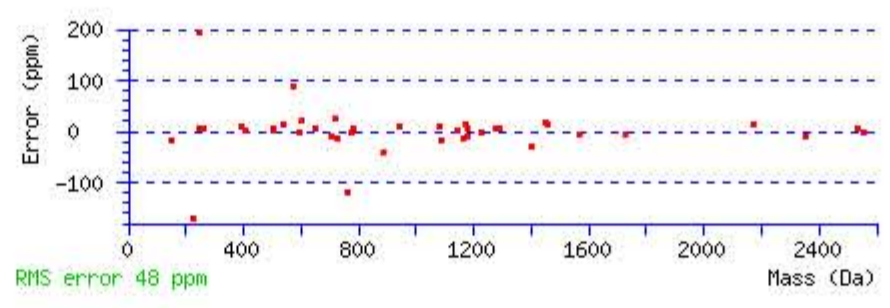

NCBI BLAST search of **YVMLPVADQYDCITHYEGSTCPK**  
 (Parameters: blastp, nr protein database, expect=20000, no filter, PAM30)  
 Other BLAST [web gateways](#)

### All matches to this query

| Score | Mr(calc):   | Delta     | Sequence                                |
|-------|-------------|-----------|-----------------------------------------|
| 71.1  | 3057.374466 | -0.006370 | <a href="#">YVMLPVADQYDCITHYEGSTCPK</a> |

# MASCOT Search Results

## Peptide View

MS/MS Fragmentation of **NQVAMNPQNTVFDAK**

Found in **HS71L\_HUMAN**, Heat shock 70 kDa protein 1-like OS=Homo sapiens GN=HSPA1L PE=1 SV=2

Match to Query 39065: 1986.965208 from(994.489880,2+) rtinseconds(2174) index(20059)

Title: Locus:1.1.1.3322.24 File:"2013-07-02 CLN FXIII 180 min 3rd F 2.wiff"

Data file C:\Program Files (x86)\Matrix Science\Mascot Daemon\mgf\9 FXIII 180 min 3rd\mascot\_daemon\_merge.mgf

Click mouse within plot area to zoom in by factor of two about that point

Or, Plot from  to  Da

Label all possible matches  Label matches used for scoring

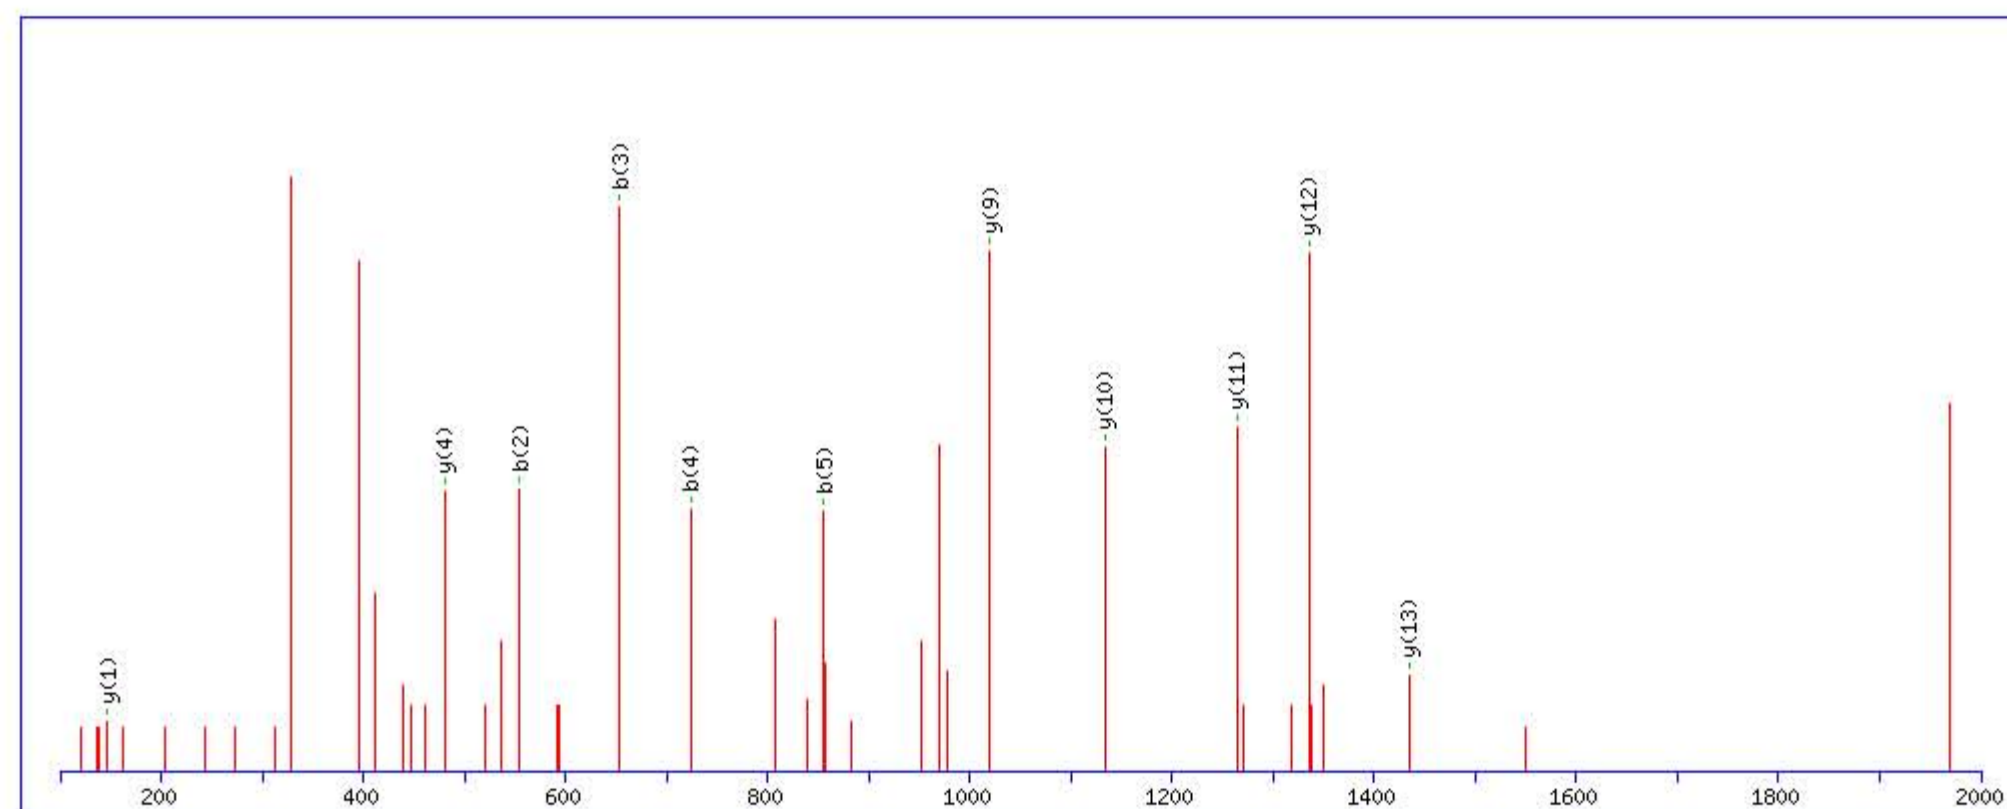

Monoisotopic mass of neutral peptide Mr(calc): 1986.965546

Fixed modifications: Carbamidomethyl (C) (apply to specified residues or termini only)

Variable modifications:

Q2 : Biotin:Thermo-21345 (Q)

Ions Score: 54 Expect: 2.1e-005

Matches : 11/146 fragment ions using 15 most intense peaks [\(help\)](#)

| #  | b                 | b <sup>++</sup> | b <sup>*</sup> | b <sup>*++</sup> | b <sup>0</sup> | b <sup>0++</sup> | Seq. | y                  | y <sup>++</sup> | y <sup>*</sup> | y <sup>*++</sup> | y <sup>0</sup> | y <sup>0++</sup> | #  |
|----|-------------------|-----------------|----------------|------------------|----------------|------------------|------|--------------------|-----------------|----------------|------------------|----------------|------------------|----|
| 1  | 115.050203        | 58.028740       | 98.023654      | 49.515465        |                |                  | N    |                    |                 |                |                  |                |                  | 15 |
| 2  | <b>554.275529</b> | 277.641403      | 537.248980     | 269.128128       |                |                  | Q    | 1873.929903        | 937.468590      | 1856.903354    | 928.955315       | 1855.919338    | 928.463307       | 14 |
| 3  | <b>653.343943</b> | 327.175610      | 636.317394     | 318.662335       |                |                  | V    | <b>1434.704577</b> | 717.855927      | 1417.678028    | 709.342652       | 1416.694012    | 708.850644       | 13 |
| 4  | <b>724.381057</b> | 362.694166      | 707.354508     | 354.180892       |                |                  | A    | <b>1335.636163</b> | 668.321720      | 1318.609614    | 659.808445       | 1317.625598    | 659.316437       | 12 |
| 5  | <b>855.421542</b> | 428.214409      | 838.394993     | 419.701134       |                |                  | M    | <b>1264.599049</b> | 632.803163      | 1247.572500    | 624.289888       | 1246.588484    | 623.797880       | 11 |
| 6  | 969.464469        | 485.235872      | 952.437920     | 476.722598       |                |                  | N    | <b>1133.558564</b> | 567.282920      | 1116.532015    | 558.769646       | 1115.547999    | 558.277638       | 10 |
| 7  | 1066.517233       | 533.762254      | 1049.490684    | 525.248980       |                |                  | P    | <b>1019.515637</b> | 510.261457      | 1002.489088    | 501.748182       | 1001.505072    | 501.256174       | 9  |
| 8  | 1194.575811       | 597.791543      | 1177.549262    | 589.278269       |                |                  | Q    | 922.462873         | 461.735075      | 905.436324     | 453.221800       | 904.452308     | 452.729792       | 8  |
| 9  | 1308.618738       | 654.813007      | 1291.592189    | 646.299733       |                |                  | N    | 794.404295         | 397.705786      | 777.377746     | 389.192511       | 776.393730     | 388.700503       | 7  |
| 10 | 1409.666417       | 705.336846      | 1392.639868    | 696.823572       | 1391.655852    | 696.331564       | T    | 680.361368         | 340.684322      | 663.334819     | 332.171048       | 662.350803     | 331.679040       | 6  |
| 11 | 1508.734831       | 754.871054      | 1491.708282    | 746.357779       | 1490.724266    | 745.865771       | V    | 579.313689         | 290.160483      | 562.287140     | 281.647208       | 561.303124     | 281.155200       | 5  |
| 12 | 1655.803245       | 828.405261      | 1638.776696    | 819.891986       | 1637.792680    | 819.399978       | F    | <b>480.245275</b>  | 240.626276      | 463.218726     | 232.113001       | 462.234710     | 231.620993       | 4  |
| 13 | 1770.830188       | 885.918732      | 1753.803639    | 877.405458       | 1752.819623    | 876.913450       | D    | 333.176861         | 167.092069      | 316.150312     | 158.578794       | 315.166296     | 158.086786       | 3  |
| 14 | 1841.867302       | 921.437289      | 1824.840753    | 912.924015       | 1823.856737    | 912.432007       | A    | 218.149918         | 109.578597      | 201.123369     | 101.065322       |                |                  | 2  |
| 15 |                   |                 |                |                  |                |                  | K    | <b>147.112804</b>  | 74.060040       | 130.086255     | 65.546765        |                |                  | 1  |

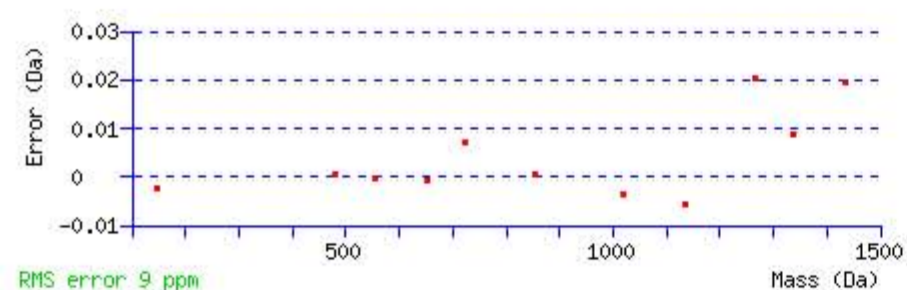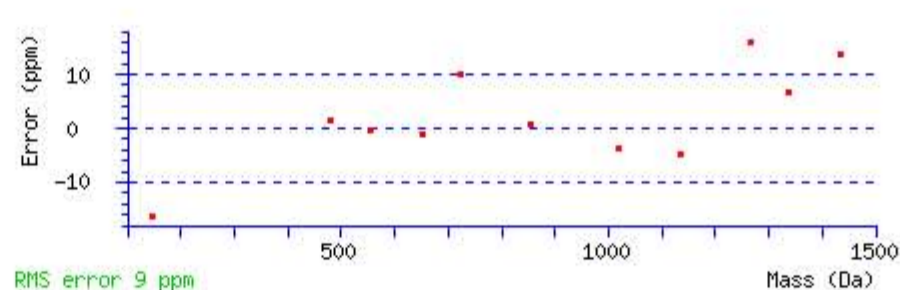

NCBI BLAST search of **NQVAMNPQNTVFDAK**

(Parameters: blastp, nr protein database, expect=20000, no filter, PAM30)

Other BLAST [web gateways](#)

## All matches to this query

| Score | Mr(calc):   | Delta     | Sequence                           |
|-------|-------------|-----------|------------------------------------|
| 53.8  | 1986.965546 | -0.000338 | <a href="#">NQVAMNPQNTVFDAK</a>    |
| 3.5   | 1986.961700 | 0.003508  | <a href="#">DFQYVLKMETQMK</a>      |
| 3.5   | 1986.961700 | 0.003508  | <a href="#">DFQYVLKMETQMK</a>      |
| 0.1   | 1986.987152 | -0.021944 | <a href="#">QHSSGQENTVKNPTHVPK</a> |

# MASCOT Search Results

## Peptide View

MS/MS Fragmentation of **SQIHDIVLVGGSTR**

Found in **HSP7C\_HUMAN**, Heat shock cognate 71 kDa protein OS=Homo sapiens GN=HSPA8 PE=1 SV=1

Match to Query 35560: 1791.968952 from(598.330260,3+) rtinseconds(2011) index(19137)

Title: Locus:1.1.1.3266.5 File:"2013-07-02 CLN FXIII 180 min 3rd F 2.wiff"

Data file C:\Program Files (x86)\Matrix Science\Mascot Daemon\mgf9 FXIII 180 min 3rd\mascot\_daemon\_merge.mgf

Click mouse within plot area to zoom in by factor of two about that point

Or, Plot from  to  Da

Label all possible matches  Label matches used for scoring

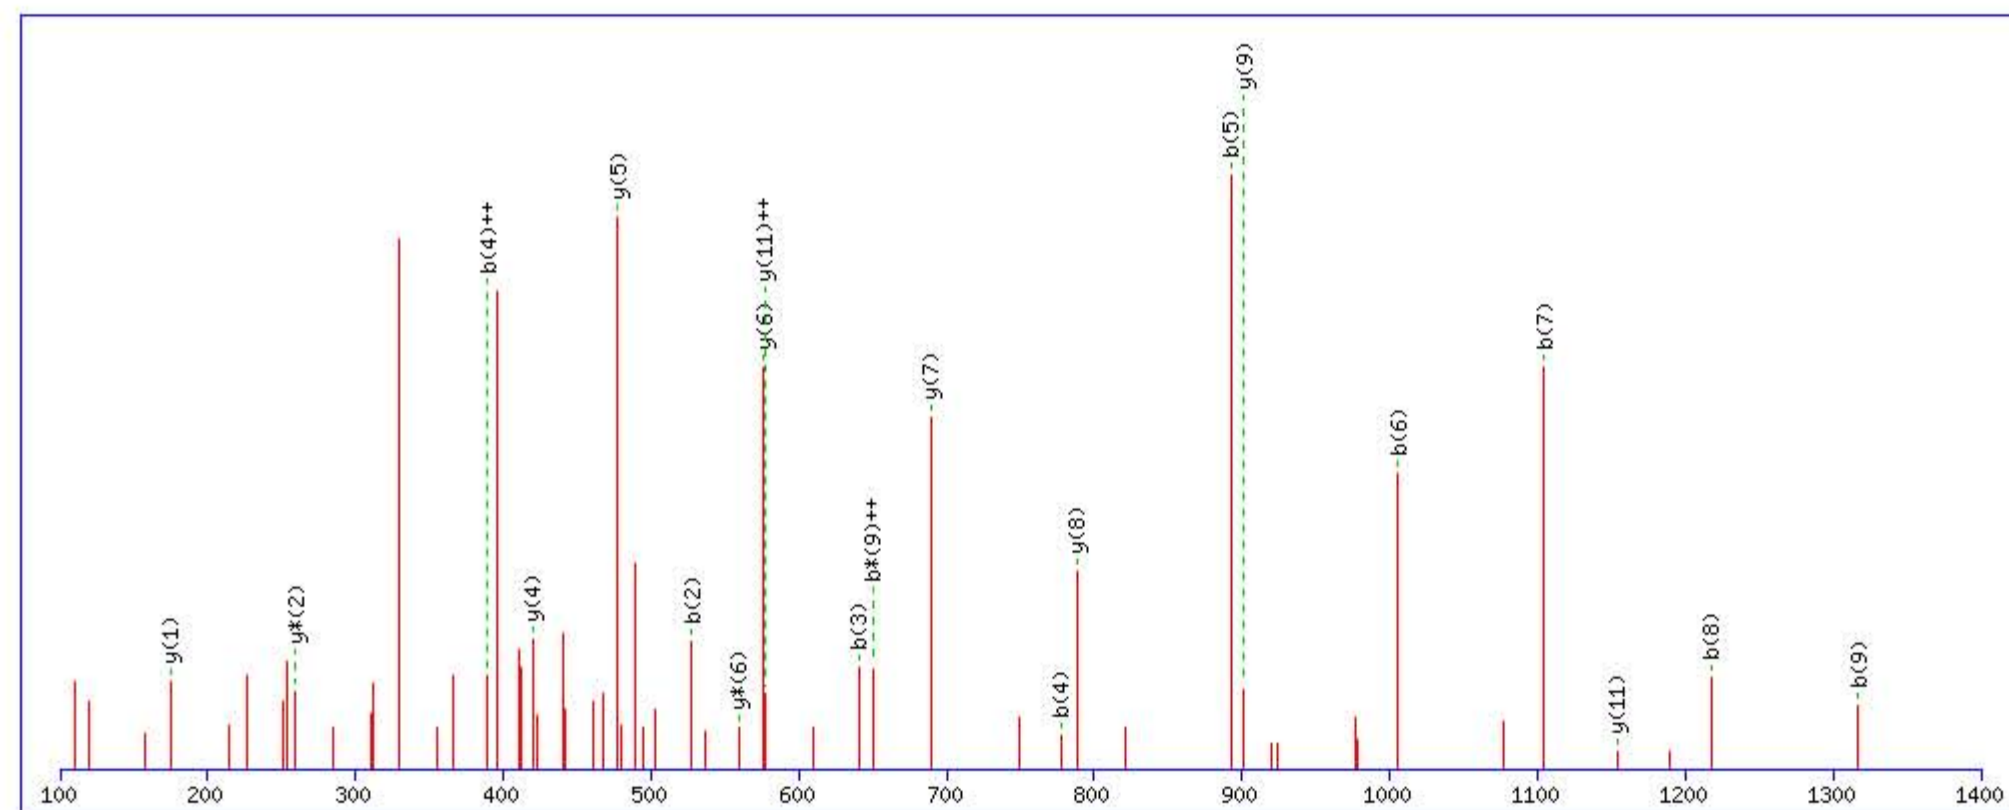

Monoisotopic mass of neutral peptide Mr(calc): 1791.966553

Fixed modifications: Carbamidomethyl (C) (apply to specified residues or termini only)

Variable modifications:

Q2 : Biotin:Thermo-21345 (Q)

Ions Score: 46 Expect: 7.3e-005

Matches : 21/152 fragment ions using 39 most intense peaks [\(help\)](#)

| #  | b                  | b <sup>++</sup>   | b <sup>*</sup> | b <sup>*++</sup>  | b <sup>0</sup> | b <sup>0++</sup> | Seq. | y                  | y <sup>++</sup>   | y <sup>*</sup>    | y <sup>*++</sup> | y <sup>0</sup> | y <sup>0++</sup> | #  |
|----|--------------------|-------------------|----------------|-------------------|----------------|------------------|------|--------------------|-------------------|-------------------|------------------|----------------|------------------|----|
| 1  | 88.039304          | 44.523290         |                |                   | 70.028739      | 35.518008        | S    |                    |                   |                   |                  |                |                  | 14 |
| 2  | <b>527.264630</b>  | 264.135953        | 510.238081     | 255.622679        | 509.254065     | 255.130671       | Q    | 1705.941788        | 853.474532        | 1688.915239       | 844.961257       | 1687.931223    | 844.469249       | 13 |
| 3  | <b>640.348694</b>  | 320.677985        | 623.322145     | 312.164711        | 622.338129     | 311.672703       | I    | 1266.716462        | 633.861869        | 1249.689913       | 625.348595       | 1248.705897    | 624.856587       | 12 |
| 4  | <b>777.407606</b>  | <b>389.207441</b> | 760.381057     | 380.694166        | 759.397041     | 380.202159       | H    | <b>1153.632398</b> | <b>577.319837</b> | 1136.605849       | 568.806563       | 1135.621833    | 568.314554       | 11 |
| 5  | <b>892.434549</b>  | 446.720913        | 875.408000     | 438.207638        | 874.423984     | 437.715630       | D    | 1016.573486        | 508.790381        | 999.546937        | 500.277107       | 998.562921     | 499.785099       | 10 |
| 6  | <b>1005.518613</b> | 503.262945        | 988.492064     | 494.749670        | 987.508048     | 494.257662       | I    | <b>901.546543</b>  | 451.276910        | 884.519994        | 442.763635       | 883.535978     | 442.271627       | 9  |
| 7  | <b>1104.587027</b> | 552.797152        | 1087.560478    | 544.283877        | 1086.576462    | 543.791869       | V    | <b>788.462479</b>  | 394.734878        | 771.435930        | 386.221603       | 770.451914     | 385.729595       | 8  |
| 8  | <b>1217.671091</b> | 609.339183        | 1200.644542    | 600.825909        | 1199.660526    | 600.333901       | L    | <b>689.394065</b>  | 345.200671        | 672.367516        | 336.687396       | 671.383500     | 336.195388       | 7  |
| 9  | <b>1316.739505</b> | 658.873391        | 1299.712956    | <b>650.360116</b> | 1298.728940    | 649.868108       | V    | <b>576.310001</b>  | 288.658639        | <b>559.283452</b> | 280.145364       | 558.299436     | 279.653356       | 6  |
| 10 | 1373.760969        | 687.384122        | 1356.734420    | 678.870848        | 1355.750404    | 678.378840       | G    | <b>477.241587</b>  | 239.124431        | 460.215038        | 230.611157       | 459.231022     | 230.119149       | 5  |
| 11 | 1430.782433        | 715.894854        | 1413.755884    | 707.381580        | 1412.771868    | 706.889572       | G    | <b>420.220123</b>  | 210.613699        | 403.193574        | 202.100425       | 402.209558     | 201.608417       | 4  |
| 12 | 1517.814461        | 759.410868        | 1500.787912    | 750.897594        | 1499.803896    | 750.405586       | S    | 363.198659         | 182.102968        | 346.172110        | 173.589693       | 345.188094     | 173.097685       | 3  |
| 13 | 1618.862140        | 809.934708        | 1601.835591    | 801.421434        | 1600.851575    | 800.929425       | T    | 276.166631         | 138.586953        | <b>259.140082</b> | 130.073679       | 258.156066     | 129.581671       | 2  |
| 14 |                    |                   |                |                   |                |                  | R    | <b>175.118952</b>  | 88.063114         | 158.092403        | 79.549839        |                |                  | 1  |

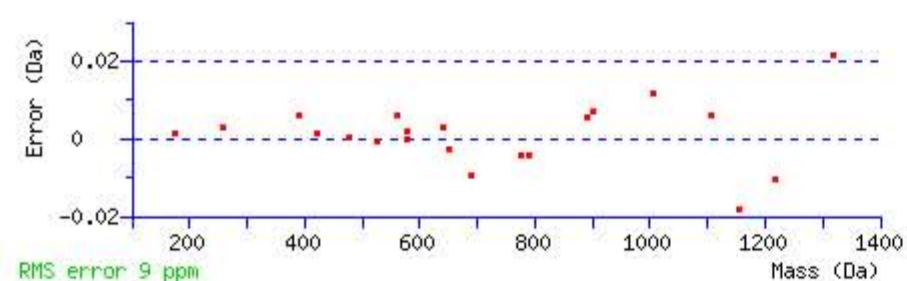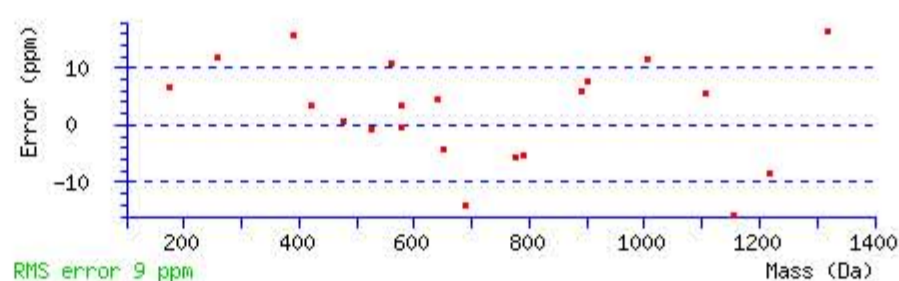

NCBI BLAST search of **SQIHDIVLVGGSTR**

(Parameters: blastp, nr protein database, expect=20000, no filter, PAM30)

Other BLAST [web gateways](#)

All matches to this query

| Score | Mr(calc):   | Delta    | Sequence                         |
|-------|-------------|----------|----------------------------------|
| 46.2  | 1791.966553 | 0.002399 | <a href="#">SQIHDIVLVGGSTR</a>   |
| 2.1   | 1791.947891 | 0.021061 | <a href="#">LGYKNSDVINTVLSNR</a> |

Mascot: <http://www.matrixscience.com/>

# MASCOT SCIENCE Mascot Search Results

## Peptide View

MS/MS Fragmentation of **TYFPHFDSLHGSAQVK**  
 Found in **HBA\_HUMAN**, Hemoglobin subunit alpha OS=Homo sapiens GN=HBA1 PE=1 SV=2

Match to Query 42230: 2144.054976 from(537.021020,4+) rtinseconds(2146) index(5700)  
 Title: Locus:1.1.1.3267.7 File:"2013-07-02 CLN FXIII 180 min 3rd F 1.wiff"  
 Data file C:\Program Files (x86)\Matrix Science\Mascot Daemon\mgf\9 FXIII 180 min 3rd\mascot\_daemon\_merge.mgf

Click mouse within plot area to zoom in by factor of two about that point  
 Or, Plot from  to  Da   
 Label all possible matches  Label matches used for scoring

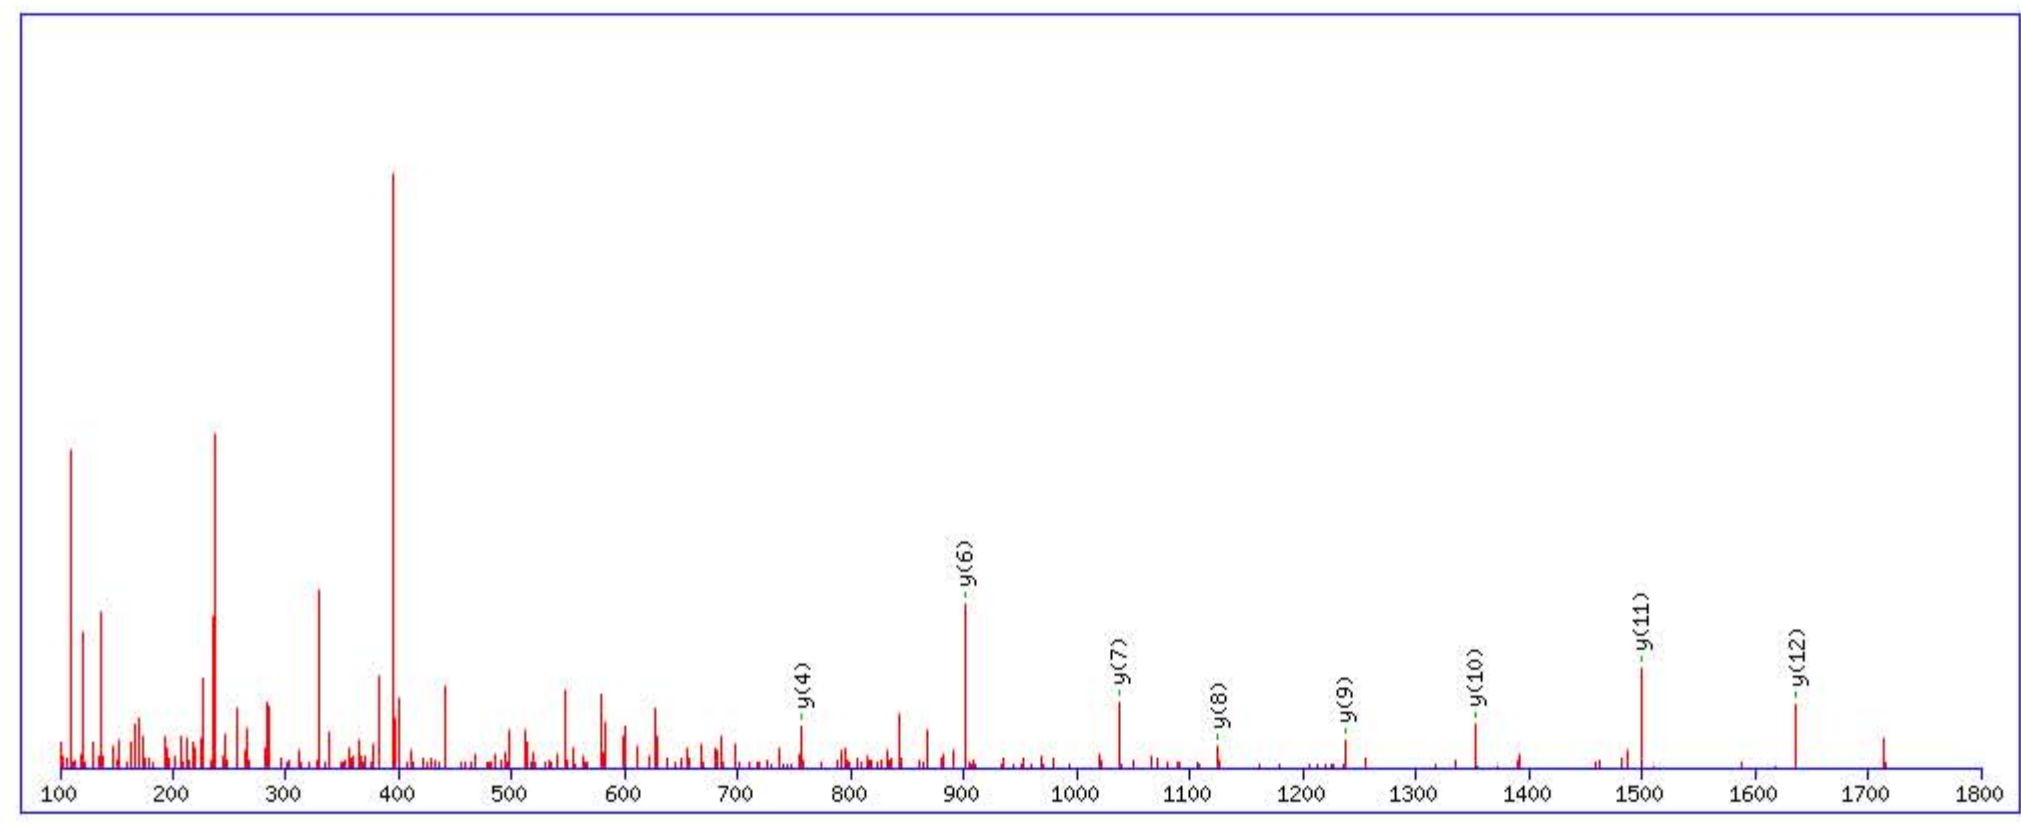

Monoisotopic mass of neutral peptide Mr(calc): 2144.051346  
 Fixed modifications: Carbamidomethyl (C) (apply to specified residues or termini only)  
 Variable modifications:  
 Q14 : Biotin:Thermo-21345 (Q)  
 Ions Score: 38 Expect: 0.0042  
 Matches : 8/146 fragment ions using 17 most intense peaks [\(help\)](#)

| #  | b           | b <sup>++</sup> | b <sup>*</sup> | b <sup>*++</sup> | b <sup>0</sup> | b <sup>0++</sup> | Seq. | y                  | y <sup>++</sup> | y <sup>*</sup> | y <sup>*++</sup> | y <sup>0</sup> | y <sup>0++</sup> | #  |
|----|-------------|-----------------|----------------|------------------|----------------|------------------|------|--------------------|-----------------|----------------|------------------|----------------|------------------|----|
| 1  | 102.054955  | 51.531116       |                |                  | 84.044390      | 42.525833        | T    |                    |                 |                |                  |                |                  | 16 |
| 2  | 265.118284  | 133.062780      |                |                  | 247.107719     | 124.057498       | Y    | 2044.010930        | 1022.509103     | 2026.984381    | 1013.995829      | 2026.000365    | 1013.503821      | 15 |
| 3  | 412.186698  | 206.596987      |                |                  | 394.176133     | 197.591705       | F    | 1880.947601        | 940.977438      | 1863.921052    | 932.464164       | 1862.937036    | 931.972156       | 14 |
| 4  | 509.239462  | 255.123369      |                |                  | 491.228897     | 246.118087       | P    | 1733.879187        | 867.443231      | 1716.852638    | 858.929957       | 1715.868622    | 858.437949       | 13 |
| 5  | 646.298374  | 323.652825      |                |                  | 628.287809     | 314.647543       | H    | <b>1636.826423</b> | 818.916849      | 1619.799874    | 810.403575       | 1618.815858    | 809.911567       | 12 |
| 6  | 793.366788  | 397.187032      |                |                  | 775.356223     | 388.181750       | F    | <b>1499.767511</b> | 750.387393      | 1482.740962    | 741.874119       | 1481.756946    | 741.382111       | 11 |
| 7  | 908.393731  | 454.700504      |                |                  | 890.383166     | 445.695221       | D    | <b>1352.699097</b> | 676.853186      | 1335.672548    | 668.339912       | 1334.688532    | 667.847904       | 10 |
| 8  | 1021.477795 | 511.242536      |                |                  | 1003.467230    | 502.237253       | L    | <b>1237.672154</b> | 619.339715      | 1220.645605    | 610.826441       | 1219.661589    | 610.334433       | 9  |
| 9  | 1108.509823 | 554.758550      |                |                  | 1090.499258    | 545.753267       | S    | <b>1124.588090</b> | 562.797683      | 1107.561541    | 554.284409       | 1106.577525    | 553.792400       | 8  |
| 10 | 1245.568735 | 623.288006      |                |                  | 1227.558170    | 614.282723       | H    | <b>1037.556062</b> | 519.281669      | 1020.529513    | 510.768394       | 1019.545497    | 510.276386       | 7  |
| 11 | 1302.590199 | 651.798738      |                |                  | 1284.579634    | 642.793455       | G    | <b>900.497150</b>  | 450.752213      | 883.470601     | 442.238938       | 882.486585     | 441.746930       | 6  |
| 12 | 1389.622227 | 695.314752      |                |                  | 1371.611662    | 686.309469       | S    | 843.475686         | 422.241481      | 826.449137     | 413.728207       | 825.465121     | 413.236199       | 5  |
| 13 | 1460.659341 | 730.833309      |                |                  | 1442.648776    | 721.828026       | A    | <b>756.443658</b>  | 378.725467      | 739.417109     | 370.212192       |                |                  | 4  |
| 14 | 1899.884667 | 950.445972      | 1882.858118    | 941.932697       | 1881.874102    | 941.440689       | Q    | 685.406544         | 343.206910      | 668.379995     | 334.693635       |                |                  | 3  |
| 15 | 1998.953081 | 999.980179      | 1981.926532    | 991.466904       | 1980.942516    | 990.974896       | V    | 246.181218         | 123.594247      | 229.154669     | 115.080972       |                |                  | 2  |
| 16 |             |                 |                |                  |                |                  | K    | 147.112804         | 74.060040       | 130.086255     | 65.546765        |                |                  | 1  |

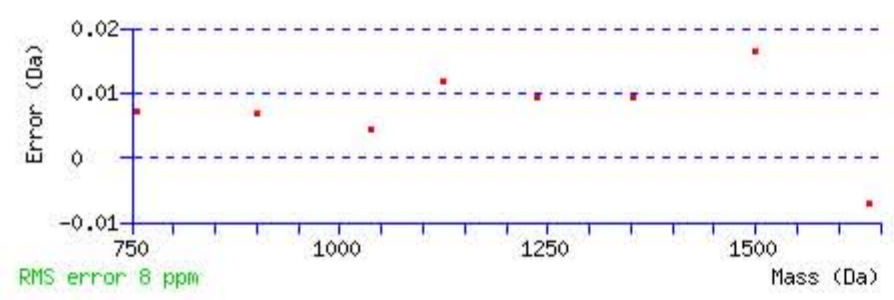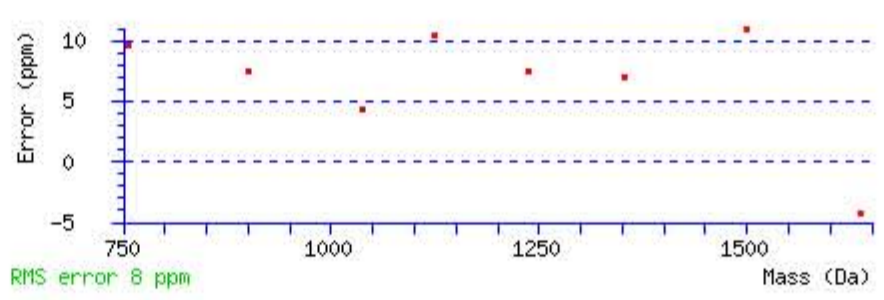

NCBI BLAST search of [TYFPHFDSLHGSAQVK](#)  
 (Parameters: blastp, nr protein database, expect=20000, no filter, PAM30)  
 Other BLAST [web gateways](#)

### All matches to this query

| Score | Mr(calc):   | Delta    | Sequence                         |
|-------|-------------|----------|----------------------------------|
| 37.8  | 2144.051346 | 0.003630 | <a href="#">TYFPHFDSLHGSAQVK</a> |



# MASCOT Search Results

## Peptide View

MS/MS Fragmentation of **EFTPPVQAAYQK**

Found in **HBB\_HUMAN**, Hemoglobin subunit beta OS=Homo sapiens GN=HBB PE=1 SV=2

Match to Query 33465: 1688.876348 from(845.445450,2+) rtinseconds(2057) index(5252)

Title: Locus:1.1.1.3236.10 File:"2013-07-02 CLN FXIII 180 min 3rd F 1.wiff"

Data file C:\Program Files (x86)\Matrix Science\Mascot Daemon\mgf\9 FXIII 180 min 3rd\mascot\_daemon\_merge.mgf

Click mouse within plot area to zoom in by factor of two about that point

Or, Plot from  to  Da

Label all possible matches  Label matches used for scoring

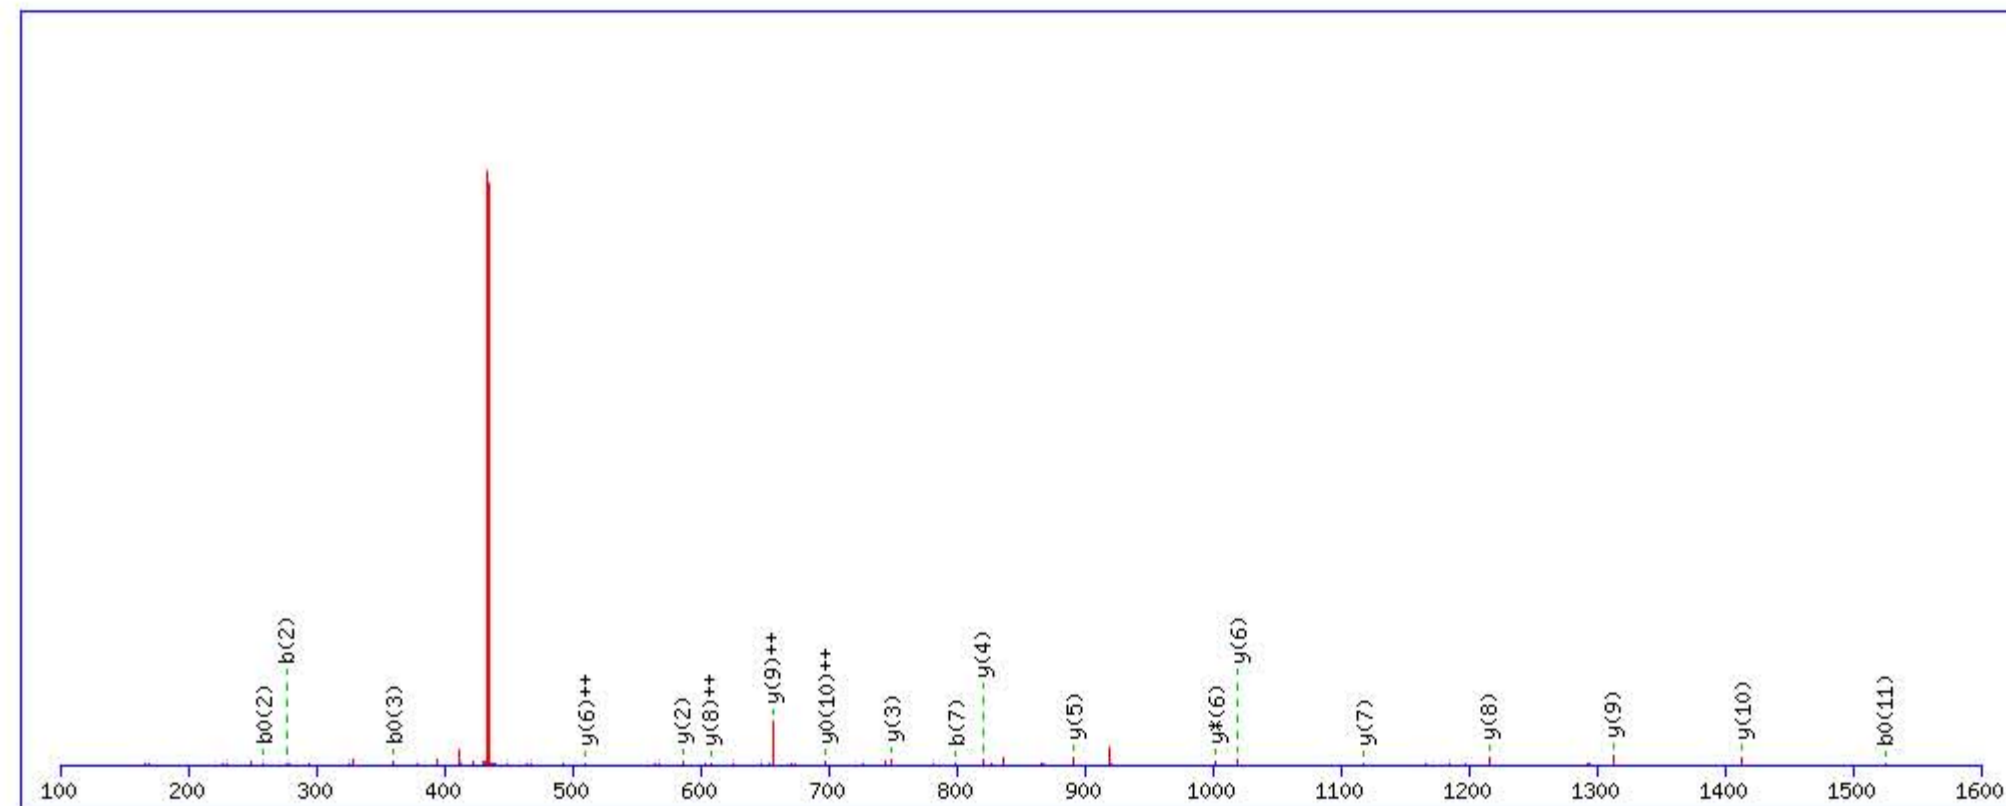

Monoisotopic mass of neutral peptide Mr(calc): 1688.859604

Fixed modifications: Carbamidomethyl (C) (apply to specified residues or termini only)

Variable modifications:

Q11 : Biotin:Thermo-21345 (Q)

Ions Score: 33 Expect: 0.00084

Matches : 19/102 fragment ions using 50 most intense peaks [\(help\)](#)

| #  | b                 | b <sup>++</sup> | b <sup>+</sup> | b <sup>+++</sup> | b <sup>0</sup>     | b <sup>0++</sup> | Seq. | y                  | y <sup>++</sup>   | y <sup>+</sup>     | y <sup>+++</sup> | y <sup>0</sup> | y <sup>0++</sup>  | #  |
|----|-------------------|-----------------|----------------|------------------|--------------------|------------------|------|--------------------|-------------------|--------------------|------------------|----------------|-------------------|----|
| 1  | 130.049869        | 65.528572       |                |                  | 112.039304         | 56.523290        | E    |                    |                   |                    |                  |                |                   | 12 |
| 2  | <b>277.118283</b> | 139.062779      |                |                  | <b>259.107718</b>  | 130.057497       | F    | 1560.824300        | 780.915788        | 1543.797751        | 772.402514       | 1542.813735    | 771.910506        | 11 |
| 3  | 378.165962        | 189.586619      |                |                  | <b>360.155397</b>  | 180.581336       | T    | <b>1413.755886</b> | 707.381581        | 1396.729337        | 698.868307       | 1395.745321    | <b>698.376299</b> | 10 |
| 4  | 475.218726        | 238.113001      |                |                  | 457.208161         | 229.107719       | P    | <b>1312.708207</b> | <b>656.857742</b> | 1295.681658        | 648.344467       |                |                   | 9  |
| 5  | 572.271490        | 286.639383      |                |                  | 554.260925         | 277.634101       | P    | <b>1215.655443</b> | <b>608.331360</b> | 1198.628894        | 599.818085       |                |                   | 8  |
| 6  | 671.339904        | 336.173590      |                |                  | 653.329339         | 327.168308       | V    | <b>1118.602679</b> | 559.804978        | 1101.576130        | 551.291703       |                |                   | 7  |
| 7  | <b>799.398482</b> | 400.202879      | 782.371933     | 391.689605       | 781.387917         | 391.197597       | Q    | <b>1019.534265</b> | <b>510.270771</b> | <b>1002.507716</b> | 501.757496       |                |                   | 6  |
| 8  | 870.435596        | 435.721436      | 853.409047     | 427.208162       | 852.425031         | 426.716154       | A    | <b>891.475687</b>  | 446.241482        | 874.449138         | 437.728207       |                |                   | 5  |
| 9  | 941.472710        | 471.239993      | 924.446161     | 462.726719       | 923.462145         | 462.234711       | A    | <b>820.438573</b>  | 410.722925        | 803.412024         | 402.209650       |                |                   | 4  |
| 10 | 1104.536039       | 552.771658      | 1087.509490    | 544.258383       | 1086.525474        | 543.766375       | Y    | <b>749.401459</b>  | 375.204368        | 732.374910         | 366.691093       |                |                   | 3  |
| 11 | 1543.761365       | 772.384321      | 1526.734816    | 763.871046       | <b>1525.750800</b> | 763.379038       | Q    | <b>586.338130</b>  | 293.672703        | 569.311581         | 285.159429       |                |                   | 2  |
| 12 |                   |                 |                |                  |                    |                  | K    | 147.112804         | 74.060040         | 130.086255         | 65.546765        |                |                   | 1  |

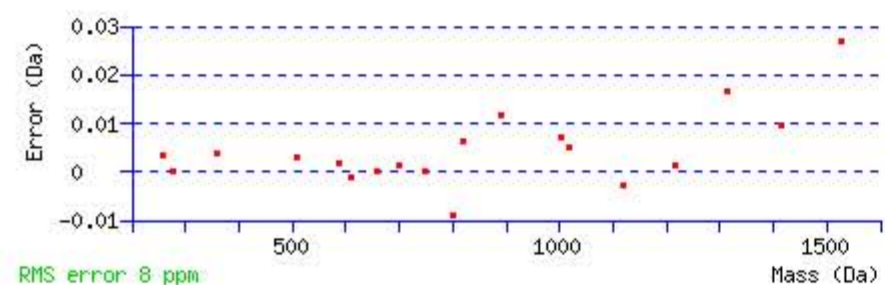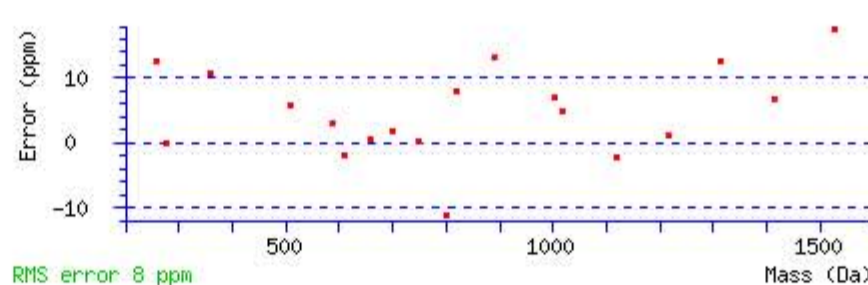

NCBI BLAST search of **EFTPPVQAAYQK**

(Parameters: blastp, nr protein database, expect=20000, no filter, PAM30)

Other BLAST [web gateways](#)

All matches to this query

| Score | Mr(calc):   | Delta     | Sequence                        |
|-------|-------------|-----------|---------------------------------|
| 33.2  | 1688.859604 | 0.016744  | <a href="#">EFTPPVQAAYQK</a>    |
| 14.6  | 1688.859604 | 0.016744  | <a href="#">EFTPPVQAAYQK</a>    |
| 0.4   | 1688.874008 | 0.002340  | <a href="#">MSSQKGNVARSRPQK</a> |
| 0.0   | 1688.877563 | -0.001215 | <a href="#">TEMAMLVTQARK</a>    |

# **MASCOT** Mascot Search Results

## Peptide View

MS/MS Fragmentation of **YYCFQGNQFLR**

Found in **HEMO\_HUMAN**, Hemopexin OS=Homo sapiens GN=HPX PE=1 SV=2

Match to Query 35819: 1805.852468 from(903.933510,2+) rtinseconds(2314) index(62292)

Title: Locus:1.1.1.1717.12 File:"2013-07-02 CLN FXIII 180 min 3rd FT.wiff"

Data file C:\Program Files (x86)\Matrix Science\Mascot Daemon\mgf9 FXIII 180 min 3rd\mascot\_daemon\_merge.mgf

Click mouse within plot area to zoom in by factor of two about that point

Or, Plot from  to  Da

Label all possible matches  Label matches used for scoring

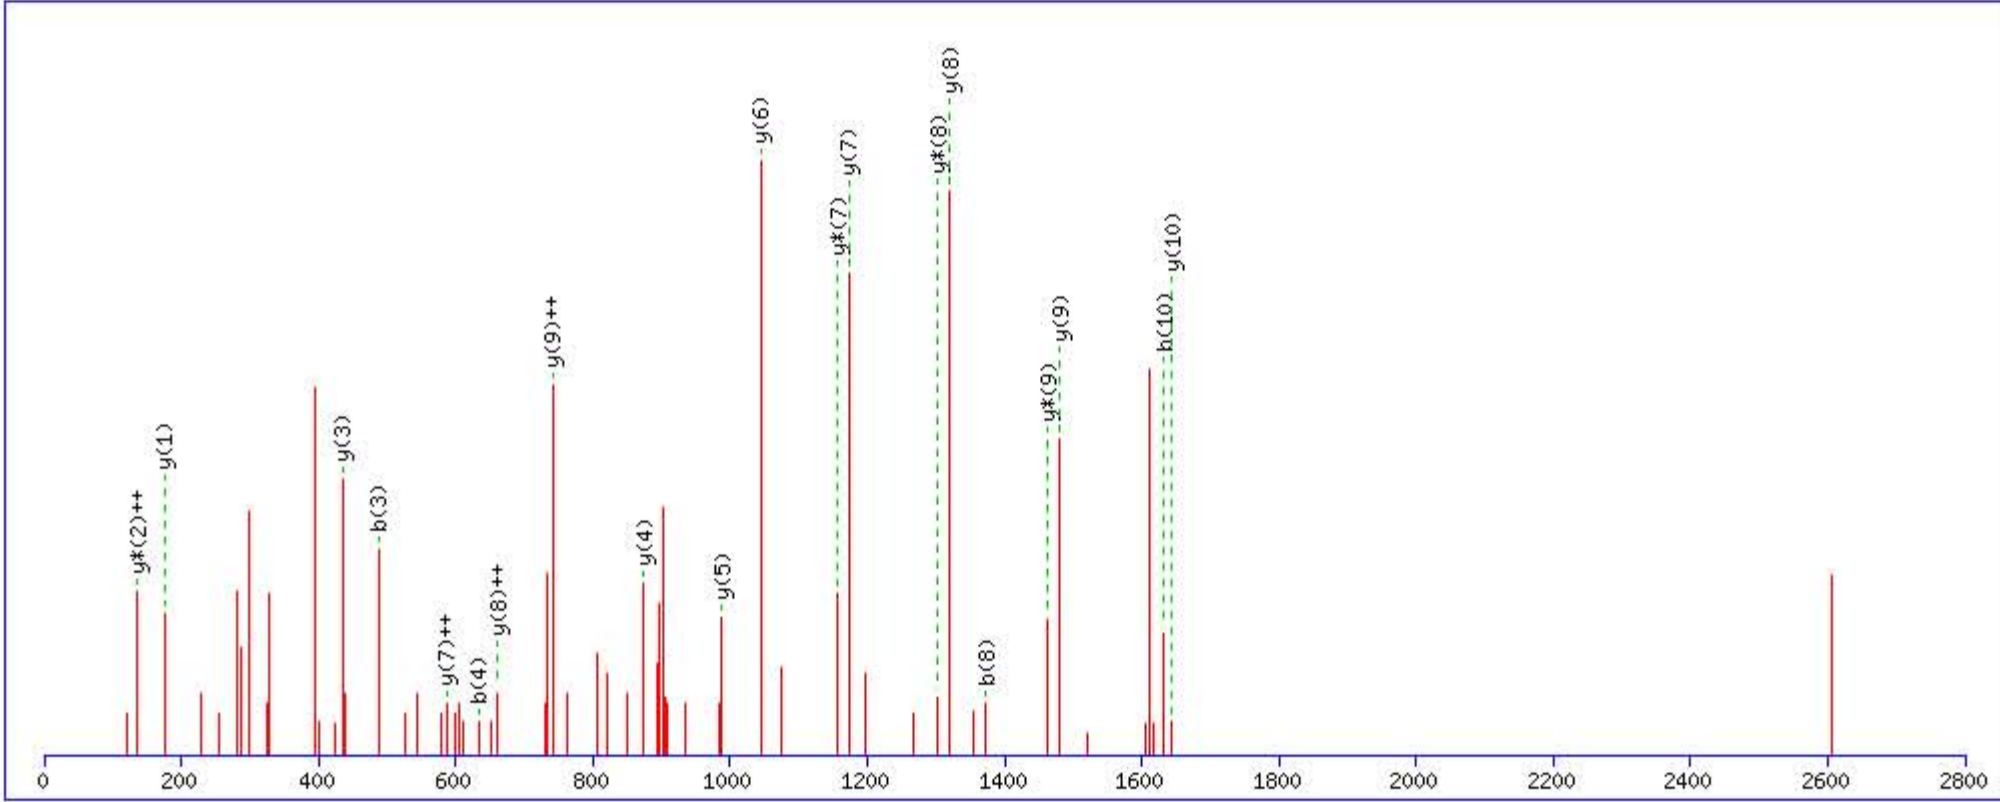

Monoisotopic mass of neutral peptide Mr(calc): 1805.838165

Fixed modifications: Carbamidomethyl (C) (apply to specified residues or termini only)

Variable modifications:

Q8 : Biotin:Thermo-21345 (Q)

Ions Score: 58 Expect: 8.2e-006

Matches : 20/72 fragment ions using 32 most intense peaks [\(help\)](#)

| #  | b           | b <sup>++</sup> | b <sup>*</sup> | b <sup>***</sup> | Seq. | y           | y <sup>++</sup> | y <sup>*</sup> | y <sup>***</sup> | #  |
|----|-------------|-----------------|----------------|------------------|------|-------------|-----------------|----------------|------------------|----|
| 1  | 164.070605  | 82.538940       |                |                  | Y    |             |                 |                |                  | 11 |
| 2  | 327.133934  | 164.070605      |                |                  | Y    | 1643.782117 | 822.394697      | 1626.755568    | 813.881422       | 10 |
| 3  | 487.164583  | 244.085930      |                |                  | C    | 1480.718788 | 740.863032      | 1463.692239    | 732.349758       | 9  |
| 4  | 634.232997  | 317.620137      |                |                  | F    | 1320.688139 | 660.847708      | 1303.661590    | 652.334433       | 8  |
| 5  | 762.291575  | 381.649426      | 745.265026     | 373.136151       | Q    | 1173.619725 | 587.313501      | 1156.593176    | 578.800226       | 7  |
| 6  | 819.313039  | 410.160158      | 802.286490     | 401.646883       | G    | 1045.561147 | 523.284212      | 1028.534598    | 514.770937       | 6  |
| 7  | 933.355966  | 467.181621      | 916.329417     | 458.668347       | N    | 988.539683  | 494.773480      | 971.513134     | 486.260205       | 5  |
| 8  | 1372.581292 | 686.794284      | 1355.554743    | 678.281010       | Q    | 874.496756  | 437.752016      | 857.470207     | 429.238742       | 4  |
| 9  | 1519.649706 | 760.328491      | 1502.623157    | 751.815217       | F    | 435.271430  | 218.139353      | 418.244881     | 209.626078       | 3  |
| 10 | 1632.733770 | 816.870523      | 1615.707221    | 808.357249       | L    | 288.203016  | 144.605146      | 271.176467     | 136.091871       | 2  |
| 11 |             |                 |                |                  | R    | 175.118952  | 88.063114       | 158.092403     | 79.549839        | 1  |

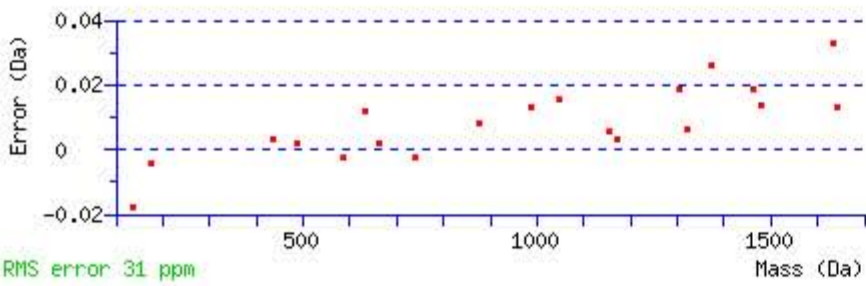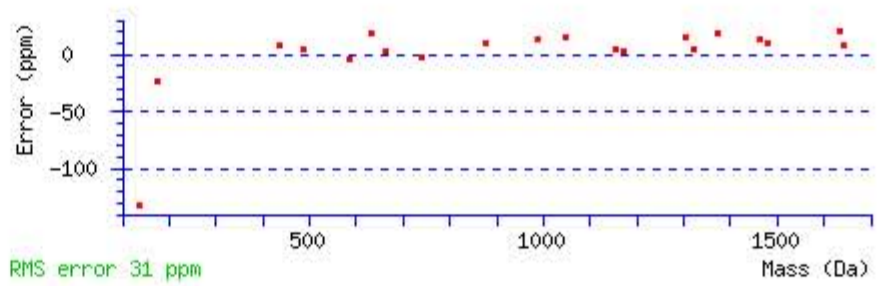

NCBI BLAST search of [YYCFQGNQFLR](#)

(Parameters: blastp, nr protein database, expect=20000, no filter, PAM30)

Other BLAST [web gateways](#)

## All matches to this query

| Score | Mr(calc):   | Delta     | Sequence                         |
|-------|-------------|-----------|----------------------------------|
| 58.1  | 1805.838165 | 0.014303  | <a href="#">YYCFQGNQFLR</a>      |
| 35.0  | 1805.838165 | 0.014303  | <a href="#">YYCFQGNQFLR</a>      |
| 3.7   | 1805.873886 | -0.021418 | <a href="#">QMFQERSSR</a>        |
| 2.3   | 1805.873032 | -0.020564 | <a href="#">VSTGDNWNGIMKDTLR</a> |

# MASCOT Search Results

## Peptide View

MS/MS Fragmentation of **GECQAEGVLFFQGDR**

Found in **HEMO\_HUMAN**, Hemopexin OS=Homo sapiens GN=HPX PE=1 SV=2

Match to Query 40252: 2022.937528 from(1012.476040,2+) rtinseconds(2426) index(62845)

Title: Locus:1.1.1.1756.12 File:"2013-07-02 CLN FXIII 180 min 3rd FT.wiff"

Data file C:\Program Files (x86)\Matrix Science\Mascot Daemon\mgf\9 FXIII 180 min 3rd\mascot\_daemon\_merge.mgf

Click mouse within plot area to zoom in by factor of two about that point

Or, Plot from  to  Da

Label all possible matches  Label matches used for scoring

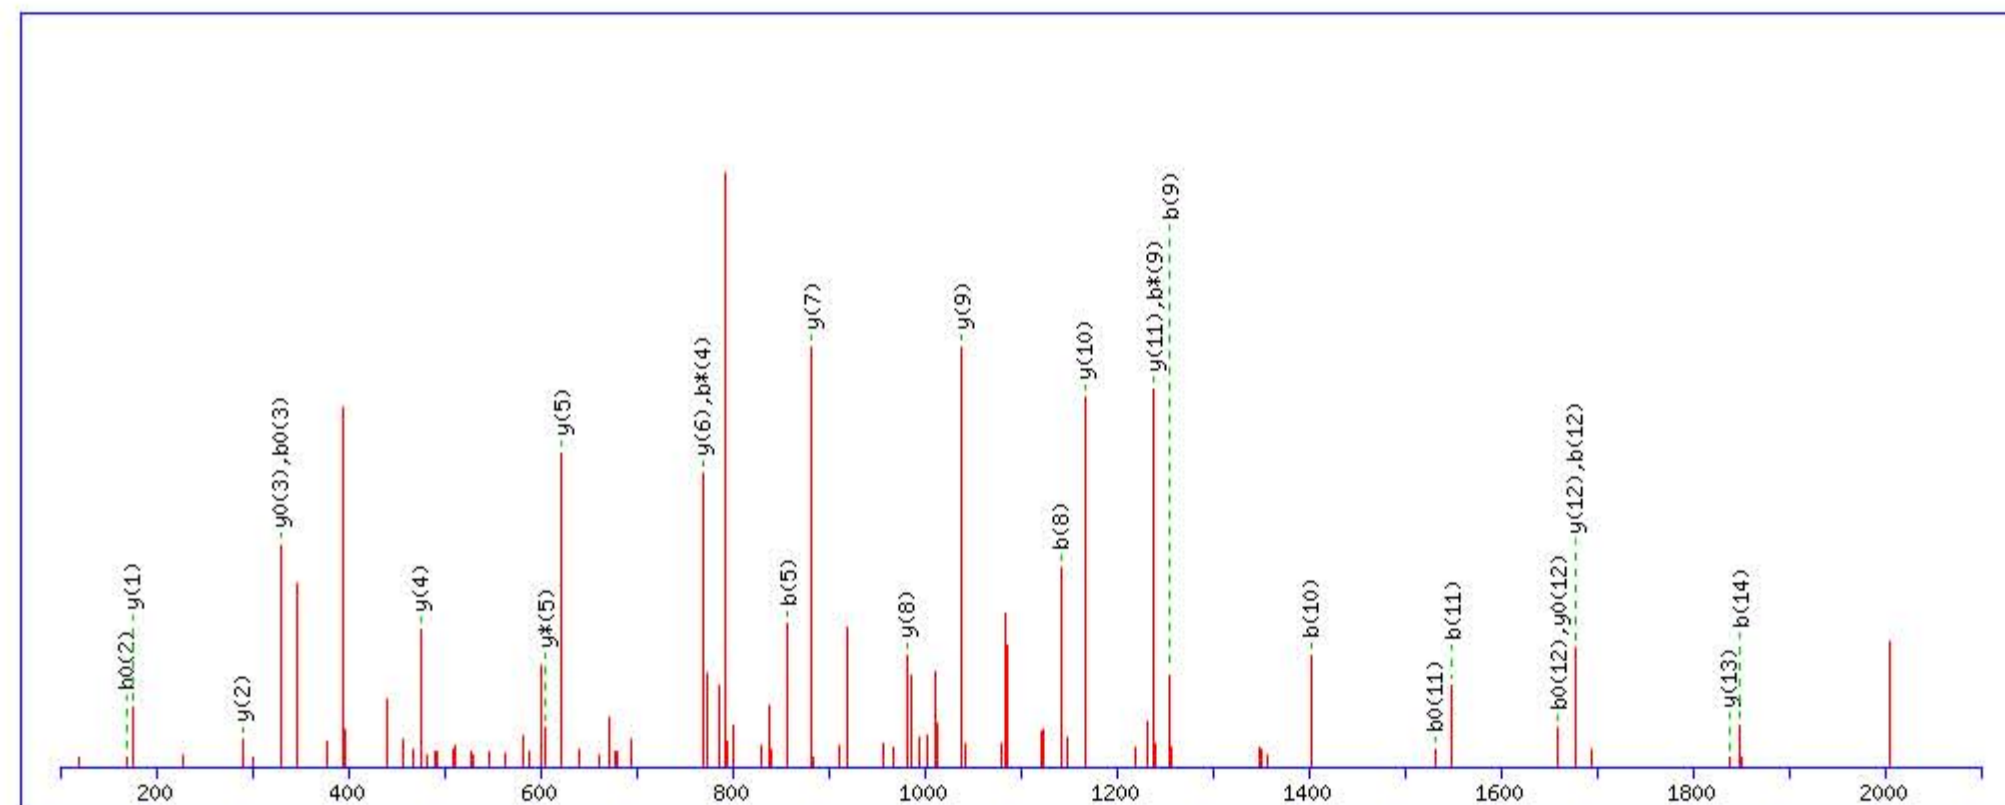

Monoisotopic mass of neutral peptide Mr(calc): 2022.929184

Fixed modifications: Carbamidomethyl (C) (apply to specified residues or termini only)

Variable modifications:

Q4 : Biotin:Thermo-21345 (Q)

Ions Score: 96 Expect: 1.9e-009

Matches : 28/158 fragment ions using 33 most intense peaks [\(help\)](#)

| #  | b           | b <sup>++</sup> | b <sup>*</sup> | b <sup>*++</sup> | b <sup>0</sup> | b <sup>0++</sup> | Seq. | y           | y <sup>++</sup> | y <sup>*</sup> | y <sup>*++</sup> | y <sup>0</sup> | y <sup>0++</sup> | #  |
|----|-------------|-----------------|----------------|------------------|----------------|------------------|------|-------------|-----------------|----------------|------------------|----------------|------------------|----|
| 1  | 58.028740   | 29.518008       |                |                  |                |                  | G    |             |                 |                |                  |                |                  | 15 |
| 2  | 187.071333  | 94.039305       |                |                  | 169.060768     | 85.034022        | E    | 1966.914982 | 983.961129      | 1949.888433    | 975.447855       | 1948.904417    | 974.955847       | 14 |
| 3  | 347.101982  | 174.054629      |                |                  | 329.091417     | 165.049347       | C    | 1837.872389 | 919.439833      | 1820.845840    | 910.926558       | 1819.861824    | 910.434550       | 13 |
| 4  | 786.327308  | 393.667292      | 769.300759     | 385.154018       | 768.316743     | 384.662010       | Q    | 1677.841740 | 839.424508      | 1660.815191    | 830.911234       | 1659.831175    | 830.419226       | 12 |
| 5  | 857.364422  | 429.185849      | 840.337873     | 420.672575       | 839.353857     | 420.180567       | A    | 1238.616414 | 619.811845      | 1221.589865    | 611.298571       | 1220.605849    | 610.806563       | 11 |
| 6  | 986.407015  | 493.707146      | 969.380466     | 485.193871       | 968.396450     | 484.701863       | E    | 1167.579300 | 584.293288      | 1150.552751    | 575.780014       | 1149.568735    | 575.288006       | 10 |
| 7  | 1043.428479 | 522.217878      | 1026.401930    | 513.704603       | 1025.417914    | 513.212595       | G    | 1038.536707 | 519.771992      | 1021.510158    | 511.258717       | 1020.526142    | 510.766709       | 9  |
| 8  | 1142.496893 | 571.752085      | 1125.470344    | 563.238810       | 1124.486328    | 562.746802       | V    | 981.515243  | 491.261260      | 964.488694     | 482.747985       | 963.504678     | 482.255977       | 8  |
| 9  | 1255.580957 | 628.294117      | 1238.554408    | 619.780842       | 1237.570392    | 619.288834       | L    | 882.446829  | 441.727053      | 865.420280     | 433.213778       | 864.436264     | 432.721770       | 7  |
| 10 | 1402.649371 | 701.828324      | 1385.622822    | 693.315049       | 1384.638806    | 692.823041       | F    | 769.362765  | 385.185021      | 752.336216     | 376.671746       | 751.352200     | 376.179738       | 6  |
| 11 | 1549.717785 | 775.362531      | 1532.691236    | 766.849256       | 1531.707220    | 766.357248       | F    | 622.294351  | 311.650814      | 605.267802     | 303.137539       | 604.283786     | 302.645531       | 5  |
| 12 | 1677.776363 | 839.391820      | 1660.749814    | 830.878545       | 1659.765798    | 830.386537       | Q    | 475.225937  | 238.116606      | 458.199388     | 229.603332       | 457.215372     | 229.111324       | 4  |
| 13 | 1734.797827 | 867.902552      | 1717.771278    | 859.389277       | 1716.787262    | 858.897269       | G    | 347.167359  | 174.087317      | 330.140810     | 165.574043       | 329.156794     | 165.082035       | 3  |
| 14 | 1849.824770 | 925.416023      | 1832.798221    | 916.902749       | 1831.814205    | 916.410741       | D    | 290.145895  | 145.576585      | 273.119346     | 137.063311       | 272.135330     | 136.571303       | 2  |
| 15 |             |                 |                |                  |                |                  | R    | 175.118952  | 88.063114       | 158.092403     | 79.549839        |                |                  | 1  |

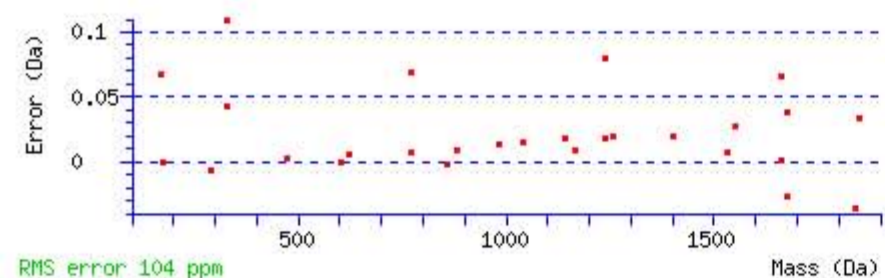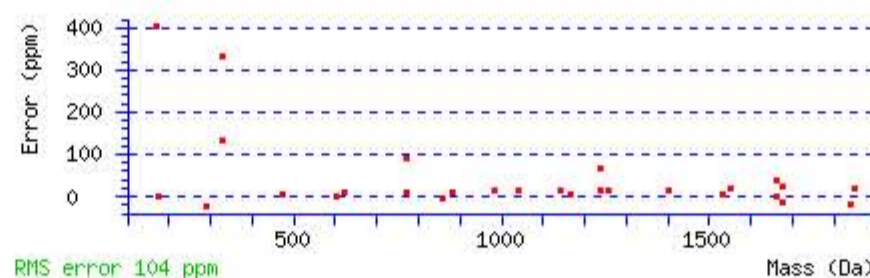

NCBI BLAST search of **GECQAEGVLFFQGDR**

(Parameters: blastp, nr protein database, expect=20000, no filter, PAM30)

Other BLAST [web gateways](#)

All matches to this query

| Score | Mr(calc):   | Delta     | Sequence                        |
|-------|-------------|-----------|---------------------------------|
| 95.9  | 2022.929184 | 0.008344  | <a href="#">GECQAEGVLFFQGDR</a> |
| 20.4  | 2022.929184 | 0.008344  | <a href="#">GECQAEGVLFFQGDR</a> |
| 2.8   | 2022.950317 | -0.012789 | <a href="#">NMSFVNDLTVTQDGR</a> |

Mascot: <http://www.matrixscience.com/>

# MASCOT Search Results

## Peptide View

MS/MS Fragmentation of **SGAQATWTLPWPHEK**

Found in **HEMO\_HUMAN**, Hemopexin OS=Homo sapiens GN=HPX PE=1 SV=2

Match to Query 42288: 2148.056742 from(717.026190,3+) rtinseconds(2317) index(62305)

Title: Locus:1.1.1.1718.12 File:"2013-07-02 CLN FXIII 180 min 3rd FT.wiff"

Data file C:\Program Files (x86)\Matrix Science\Mascot Daemon\mgf9 FXIII 180 min 3rd\mascot\_daemon\_merge.mgf

Click mouse within plot area to zoom in by factor of two about that point

Or, Plot from  to  Da

Label all possible matches  Label matches used for scoring

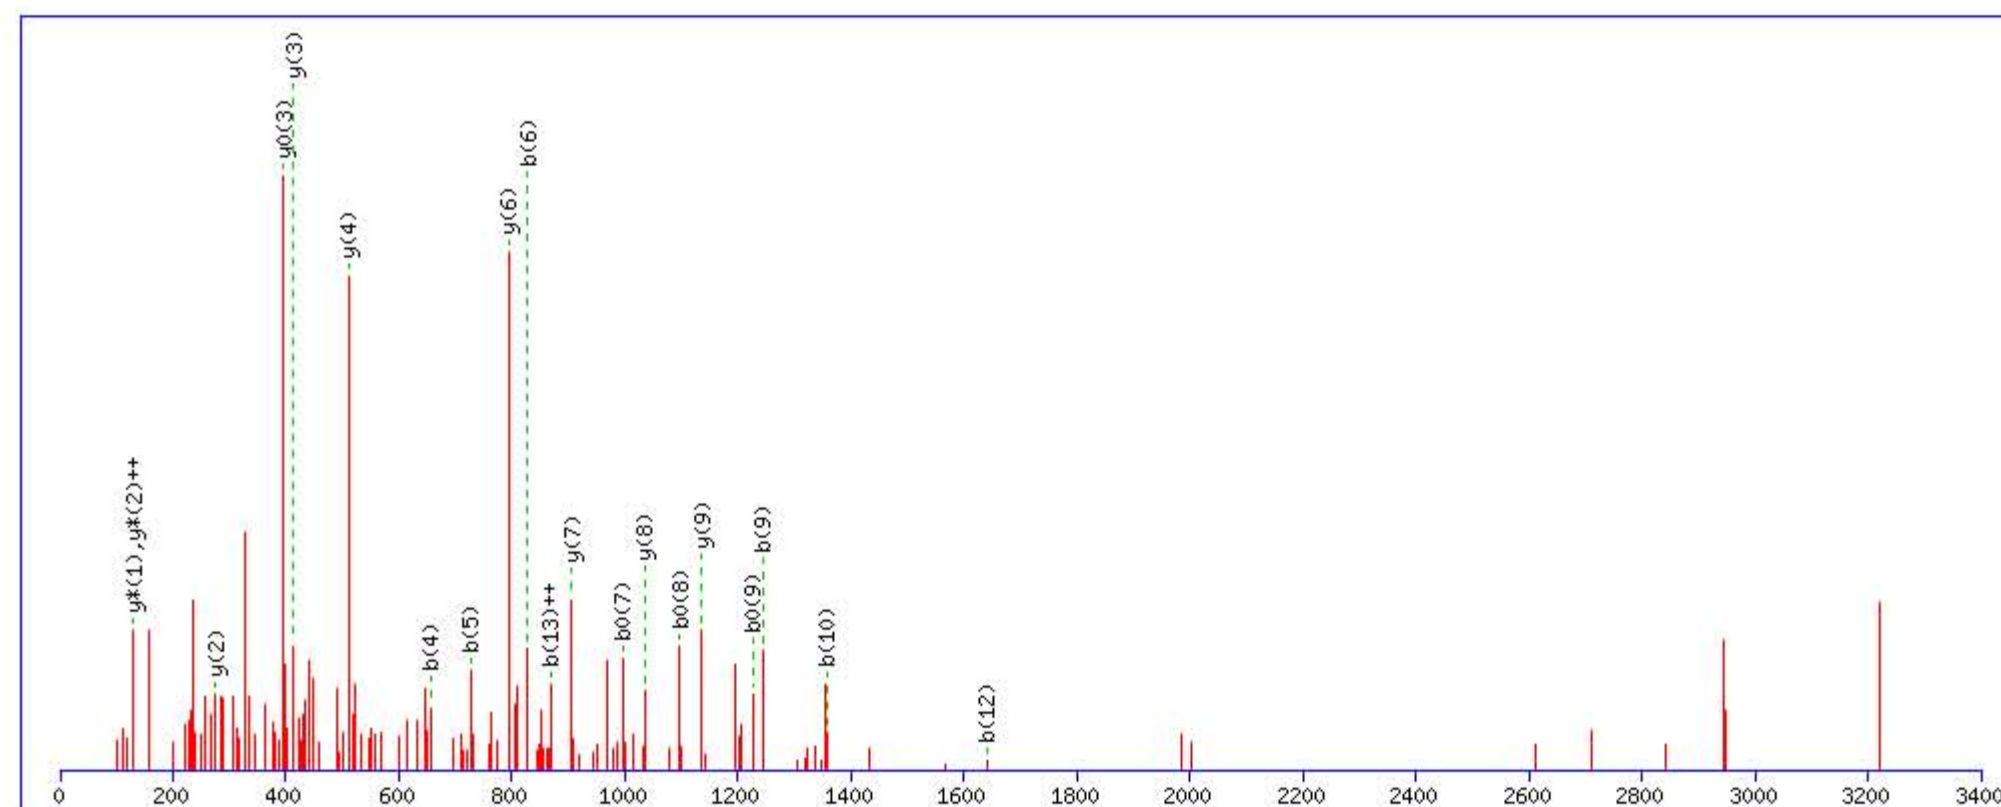

Monoisotopic mass of neutral peptide Mr(calc): 2148.046234

Fixed modifications: Carbamidomethyl (C) (apply to specified residues or termini only)

Variable modifications:

Q4 : Biotin:Thermo-21345 (Q)

Ions Score: 43 Expect: 0.00012

Matches : 20/172 fragment ions using 31 most intense peaks [\(help\)](#)

| #  | b                  | b <sup>++</sup>   | b <sup>*</sup> | b <sup>+++</sup> | b <sup>0</sup>     | b <sup>0++</sup> | Seq. | y                  | y <sup>++</sup> | y <sup>*</sup>    | y <sup>+++</sup>  | y <sup>0</sup>    | y <sup>0++</sup> | #  |
|----|--------------------|-------------------|----------------|------------------|--------------------|------------------|------|--------------------|-----------------|-------------------|-------------------|-------------------|------------------|----|
| 1  | 88.039304          | 44.523290         |                |                  | 70.028739          | 35.518008        | S    |                    |                 |                   |                   |                   |                  | 16 |
| 2  | 145.060768         | 73.034022         |                |                  | 127.050203         | 64.028740        | G    | 2062.021496        | 1031.514386     | 2044.994947       | 1023.001111       | 2044.010931       | 1022.509103      | 15 |
| 3  | 216.097882         | 108.552579        |                |                  | 198.087317         | 99.547296        | A    | 2005.000032        | 1003.003654     | 1987.973483       | 994.490380        | 1986.989467       | 993.998372       | 14 |
| 4  | <b>655.323208</b>  | 328.165242        | 638.296659     | 319.651968       | 637.312643         | 319.159960       | Q    | 1933.962918        | 967.485097      | 1916.936369       | 958.971823        | 1915.952353       | 958.479815       | 13 |
| 5  | <b>726.360322</b>  | 363.683799        | 709.333773     | 355.170525       | 708.349757         | 354.678517       | A    | 1494.737592        | 747.872434      | 1477.711043       | 739.359160        | 1476.727027       | 738.867152       | 12 |
| 6  | <b>827.408001</b>  | 414.207639        | 810.381452     | 405.694364       | 809.397436         | 405.202356       | T    | 1423.700478        | 712.353877      | 1406.673929       | 703.840603        | 1405.689913       | 703.348595       | 11 |
| 7  | 1013.487314        | 507.247295        | 996.460765     | 498.734020       | <b>995.476749</b>  | 498.242012       | W    | 1322.652799        | 661.830038      | 1305.626250       | 653.316763        | 1304.642234       | 652.824755       | 10 |
| 8  | 1114.534993        | 557.771135        | 1097.508444    | 549.257860       | <b>1096.524428</b> | 548.765852       | T    | <b>1136.573486</b> | 568.790381      | 1119.546937       | 560.277107        | 1118.562921       | 559.785099       | 9  |
| 9  | <b>1243.577586</b> | 622.292431        | 1226.551037    | 613.779157       | <b>1225.567021</b> | 613.287149       | E    | <b>1035.525807</b> | 518.266542      | 1018.499258       | 509.753267        | 1017.515242       | 509.261259       | 8  |
| 10 | <b>1356.661650</b> | 678.834463        | 1339.635101    | 670.321189       | 1338.651085        | 669.829181       | L    | <b>906.483214</b>  | 453.745245      | 889.456665        | 445.231971        | 888.472649        | 444.739963       | 7  |
| 11 | 1453.714414        | 727.360845        | 1436.687865    | 718.847571       | 1435.703849        | 718.355563       | P    | <b>793.399150</b>  | 397.203213      | 776.372601        | 388.689939        | 775.388585        | 388.197931       | 6  |
| 12 | <b>1639.793727</b> | 820.400502        | 1622.767178    | 811.887227       | 1621.783162        | 811.395219       | W    | 696.346386         | 348.676831      | 679.319837        | 340.163557        | 678.335821        | 339.671549       | 5  |
| 13 | 1736.846491        | <b>868.926884</b> | 1719.819942    | 860.413609       | 1718.835926        | 859.921601       | P    | <b>510.267073</b>  | 255.637175      | 493.240524        | 247.123900        | 492.256508        | 246.631892       | 4  |
| 14 | 1873.905403        | 937.456340        | 1856.878854    | 928.943065       | 1855.894838        | 928.451057       | H    | <b>413.214309</b>  | 207.110793      | 396.187760        | 198.597518        | <b>395.203744</b> | 198.105510       | 3  |
| 15 | 2002.947996        | 1001.977636       | 1985.921447    | 993.464362       | 1984.937431        | 992.972354       | E    | <b>276.155397</b>  | 138.581337      | 259.128848        | <b>130.068062</b> | 258.144832        | 129.576054       | 2  |
| 16 |                    |                   |                |                  |                    |                  | K    | 147.112804         | 74.060040       | <b>130.086255</b> | 65.546765         |                   |                  | 1  |

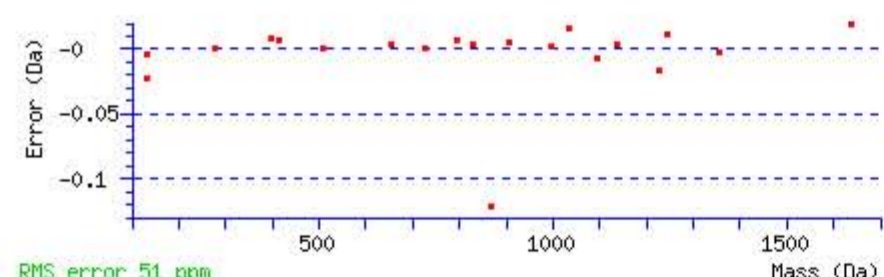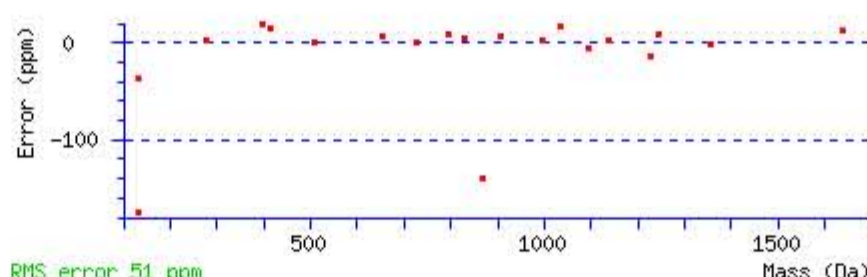

NCBI BLAST search of **SGAQATWTLPWPHEK**

(Parameters: blastp, nr protein database, expect=20000, no filter, PAM30)

Other BLAST [web gateways](#)

## All matches to this query

| Score | Mr(calc):   | Delta    | Sequence                               |
|-------|-------------|----------|----------------------------------------|
| 42.5  | 2148.046234 | 0.010508 | <a href="#">SGAQATWTLPWPHEK</a>        |
| 0.5   | 2148.049408 | 0.007334 | <a href="#">EPEGPAQA AVASGCLTRHAAR</a> |

# Mascot Search Results

## Peptide View

MS/MS Fragmentation of **LLQDEFPGIPSPLDAAVECHR**  
Found in **HEMO\_HUMAN**, Hemopexin OS=Homo sapiens GN=HPX PE=1 SV=2

Match to Query 50162: 2674.346472 from(892.456100,3+) rtinseconds(2693) index(64372)  
Title: Locus:1.1.1.1848.9 File:"2013-07-02 CLN FXIII 180 min 3rd FT.wiff"  
Data file C:\Program Files (x86)\Matrix Science\Mascot Daemon\mgf\9 FXIII 180 min 3rd\mascot\_daemon\_merge.mgf

Click mouse within plot area to zoom in by factor of two about that point  
Or, Plot from 0 to 2800 Da Full range  
Label all possible matches  Label matches used for scoring

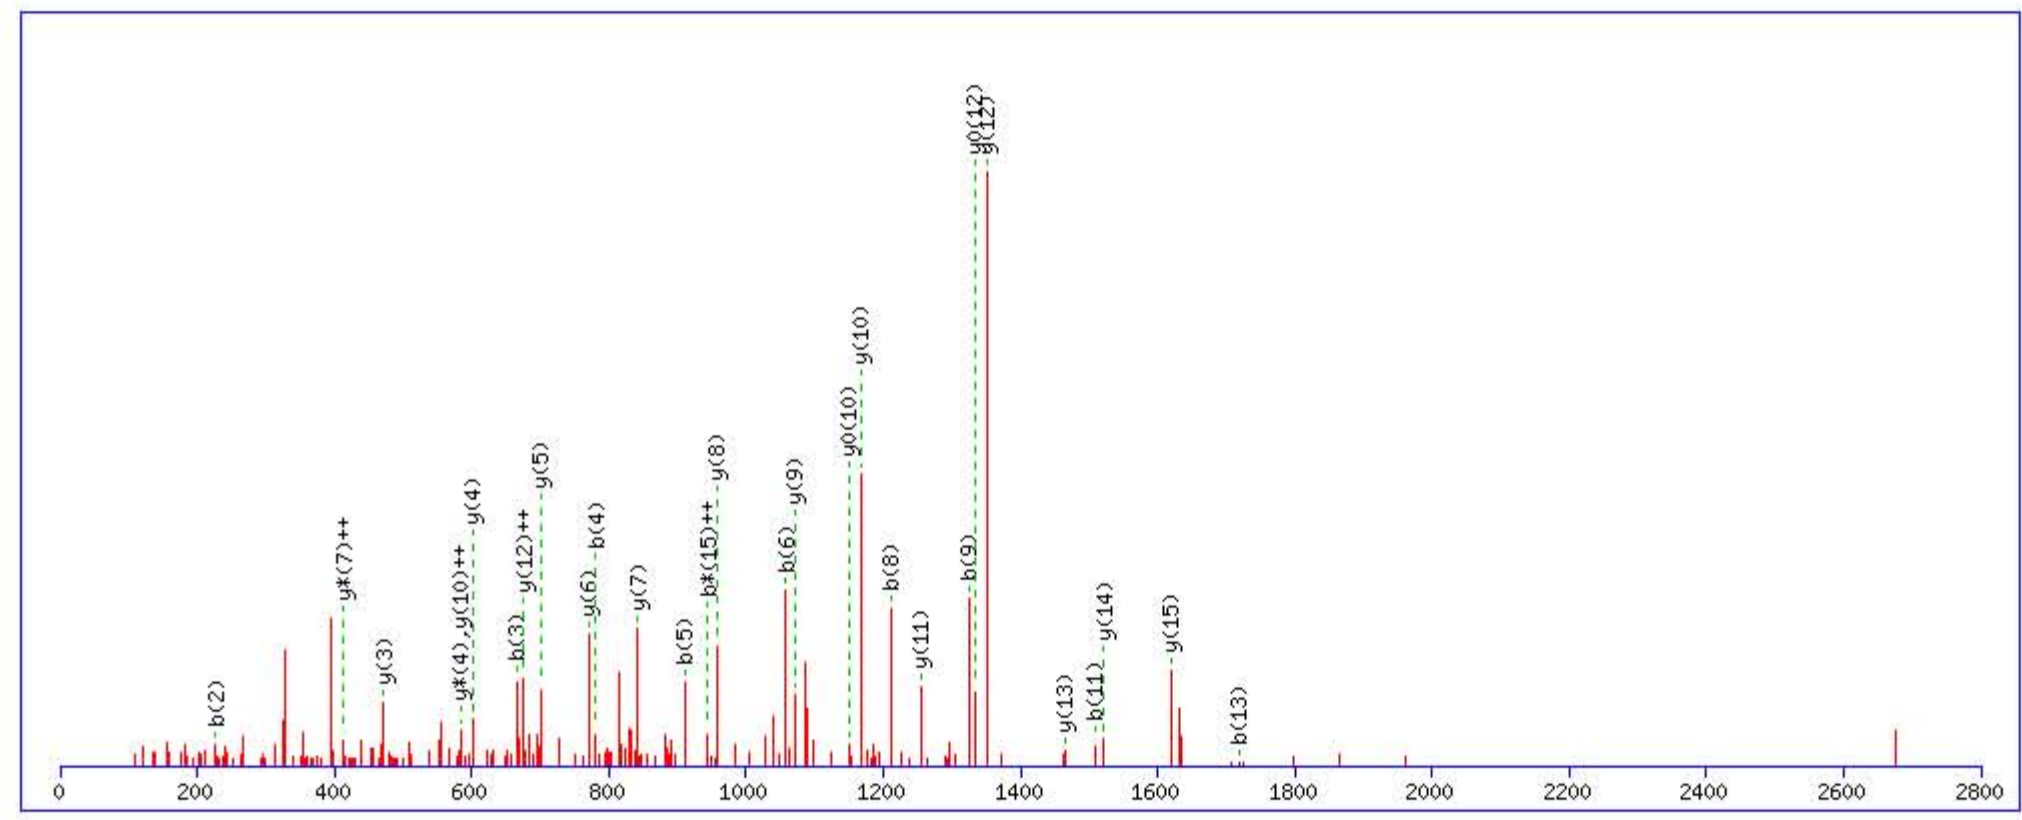

Monoisotopic mass of neutral peptide Mr(calc): 2674.324722  
Fixed modifications: Carbamidomethyl (C) (apply to specified residues or termini only)  
Variable modifications:  
Q3 : Biotin:Thermo-21345 (Q)  
Ions Score: 80 Expect: 2.8e-007  
Matches : 29/224 fragment ions using 51 most intense peaks (help)

| #  | b                  | b <sup>++</sup> | b <sup>*</sup> | b <sup>*++</sup>  | b <sup>0</sup> | b <sup>0++</sup> | Seq. | y                  | y <sup>++</sup>   | y <sup>*</sup>    | y <sup>*++</sup>  | y <sup>0</sup>     | y <sup>0++</sup> | #  |
|----|--------------------|-----------------|----------------|-------------------|----------------|------------------|------|--------------------|-------------------|-------------------|-------------------|--------------------|------------------|----|
| 1  | 114.091340         | 57.549308       |                |                   |                |                  | L    |                    |                   |                   |                   |                    |                  | 21 |
| 2  | <b>227.175404</b>  | 114.091340      |                |                   |                |                  | L    | 2562.247943        | 1281.627609       | 2545.221394       | 1273.114335       | 2544.237378        | 1272.622327      | 20 |
| 3  | <b>666.400730</b>  | 333.704003      | 649.374181     | 325.190729        |                |                  | Q    | 2449.163879        | 1225.085577       | 2432.137330       | 1216.572303       | 2431.153314        | 1216.080295      | 19 |
| 4  | <b>781.427673</b>  | 391.217475      | 764.401124     | 382.704200        | 763.417108     | 382.212192       | D    | 2009.938553        | 1005.472914       | 1992.912004       | 996.959640        | 1991.927988        | 996.467632       | 18 |
| 5  | <b>910.470266</b>  | 455.738771      | 893.443717     | 447.225497        | 892.459701     | 446.733489       | E    | 1894.911610        | 947.959443        | 1877.885061       | 939.446169        | 1876.901045        | 938.954160       | 17 |
| 6  | <b>1057.538680</b> | 529.272978      | 1040.512131    | 520.759704        | 1039.528115    | 520.267696       | F    | 1765.869017        | 883.438146        | 1748.842468       | 874.924872        | 1747.858452        | 874.432864       | 16 |
| 7  | 1154.591444        | 577.799360      | 1137.564895    | 569.286086        | 1136.580879    | 568.794078       | P    | <b>1618.800603</b> | 809.903939        | 1601.774054       | 801.390665        | 1600.790038        | 800.898657       | 15 |
| 8  | <b>1211.612908</b> | 606.310092      | 1194.586359    | 597.796818        | 1193.602343    | 597.304810       | G    | <b>1521.747839</b> | 761.377557        | 1504.721290       | 752.864283        | 1503.737274        | 752.372275       | 14 |
| 9  | <b>1324.696972</b> | 662.852124      | 1307.670423    | 654.338850        | 1306.686407    | 653.846841       | I    | <b>1464.726375</b> | 732.866825        | 1447.699826       | 724.353551        | 1446.715810        | 723.861543       | 13 |
| 10 | 1421.749736        | 711.378506      | 1404.723187    | 702.865232        | 1403.739171    | 702.373223       | P    | <b>1351.642311</b> | <b>676.324793</b> | 1334.615762       | 667.811519        | <b>1333.631746</b> | 667.319511       | 12 |
| 11 | <b>1508.781764</b> | 754.894520      | 1491.755215    | 746.381246        | 1490.771199    | 745.889238       | S    | <b>1254.589547</b> | 627.798411        | 1237.562998       | 619.285137        | 1236.578982        | 618.793129       | 11 |
| 12 | 1605.834528        | 803.420902      | 1588.807979    | 794.907628        | 1587.823963    | 794.415620       | P    | <b>1167.557519</b> | <b>584.282397</b> | 1150.530970       | 575.769123        | <b>1149.546954</b> | 575.277115       | 10 |
| 13 | <b>1718.918592</b> | 859.962934      | 1701.892043    | 851.449660        | 1700.908027    | 850.957652       | L    | <b>1070.504755</b> | 535.756015        | 1053.478206       | 527.242741        | 1052.494190        | 526.750733       | 9  |
| 14 | 1833.945535        | 917.476406      | 1816.918986    | 908.963131        | 1815.934970    | 908.471123       | D    | <b>957.420691</b>  | 479.213983        | 940.394142        | 470.700709        | 939.410126         | 470.208701       | 8  |
| 15 | 1904.982649        | 952.994963      | 1887.956100    | <b>944.481688</b> | 1886.972084    | 943.989680       | A    | <b>842.393748</b>  | 421.700512        | 825.367199        | <b>413.187237</b> | 824.383183         | 412.695229       | 7  |
| 16 | 1976.019763        | 988.513520      | 1958.993214    | 980.000245        | 1958.009198    | 979.508237       | A    | <b>771.356634</b>  | 386.181955        | 754.330085        | 377.668680        | 753.346069         | 377.176672       | 6  |
| 17 | 2075.088177        | 1038.047726     | 2058.061628    | 1029.534452       | 2057.077612    | 1029.042444      | V    | <b>700.319520</b>  | 350.663398        | 683.292971        | 342.150123        | 682.308955         | 341.658115       | 5  |
| 18 | 2204.130770        | 1102.569023     | 2187.104221    | 1094.055748       | 2186.120205    | 1093.563740      | E    | <b>601.251106</b>  | 301.129191        | <b>584.224557</b> | 292.615916        | 583.240541         | 292.123908       | 4  |
| 19 | 2364.161419        | 1182.584347     | 2347.134870    | 1174.071073       | 2346.150854    | 1173.579065      | C    | <b>472.208513</b>  | 236.607894        | 455.181964        | 228.094620        |                    |                  | 3  |
| 20 | 2501.220331        | 1251.113803     | 2484.193782    | 1242.600529       | 2483.209766    | 1242.108521      | H    | 312.177864         | 156.592570        | 295.151315        | 148.079295        |                    |                  | 2  |
| 21 |                    |                 |                |                   |                |                  | R    | 175.118952         | 88.063114         | 158.092403        | 79.549839         |                    |                  | 1  |

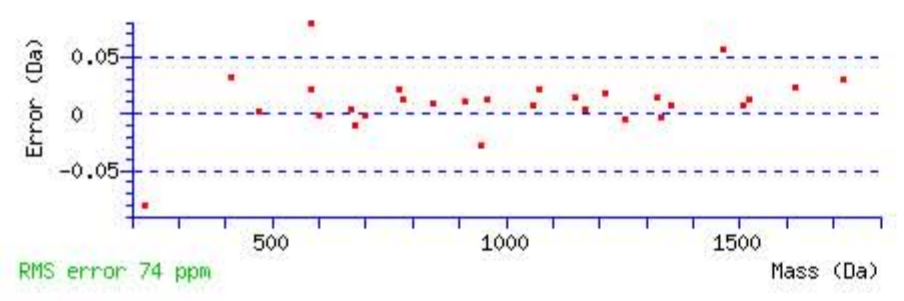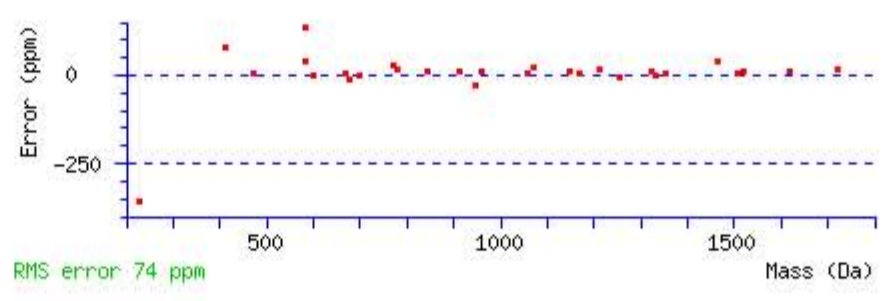

NCBI BLAST search of **LLQDEFPGIPSPLDAAVECHR**  
(Parameters: blastp, nr protein database, expect=20000, no filter, PAM30)  
Other BLAST [web gateways](#)

### All matches to this query

| Score | Mr(calc):   | Delta    | Sequence                              |
|-------|-------------|----------|---------------------------------------|
| 80.0  | 2674.324722 | 0.021750 | <a href="#">LLQDEFPGIPSPLDAAVECHR</a> |

# MASCOT Search Results

## Peptide View

MS/MS Fragmentation of **GPLDQLEK**

Found in **HEP2\_HUMAN**, Heparin cofactor 2 OS=Homo sapiens GN=SERPIND1 PE=1 SV=3

Match to Query 17960: 1209.640928 from(605.827740,2+) rtinseconds(2104) index(32473)

Title: Locus:1.1.1.3396.10 File:"2013-07-02 CLN FXIII 180 min 3rd F 3.wiff"

Data file C:\Program Files (x86)\Matrix Science\Mascot Daemon\mgf9 FXIII 180 min 3rd\mascot\_daemon\_merge.mgf

Click mouse within plot area to zoom in by factor of two about that point

Or, Plot from  to  Da

Label all possible matches  Label matches used for scoring

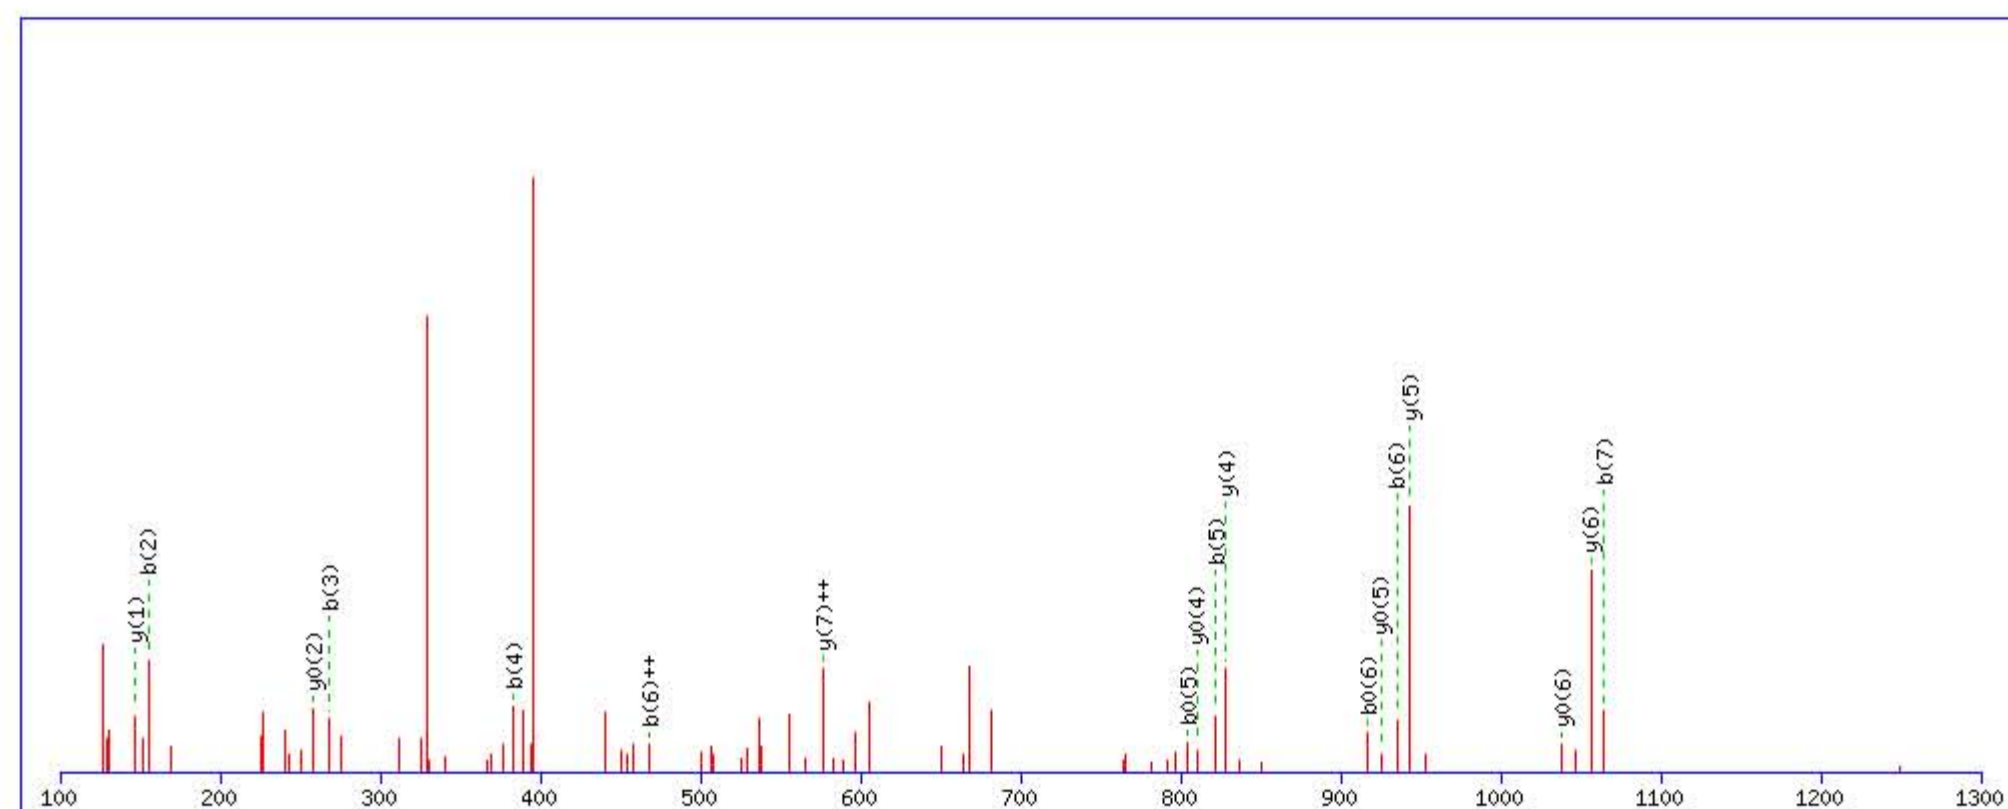

Monoisotopic mass of neutral peptide Mr(calc): 1209.642731

Fixed modifications: Carbamidomethyl (C) (apply to specified residues or termini only)

Variable modifications:

Q5 : Biotin:Thermo-21345 (Q)

Ions Score: 32 Expect: 0.009

Matches : 18/68 fragment ions using 30 most intense peaks [\(help\)](#)

| # | b                  | b <sup>++</sup>   | b <sup>*</sup> | b <sup>*++</sup> | b <sup>0</sup>    | b <sup>0++</sup> | Seq.     | y                  | y <sup>++</sup>   | y <sup>*</sup> | y <sup>*++</sup> | y <sup>0</sup>     | y <sup>0++</sup> | # |
|---|--------------------|-------------------|----------------|------------------|-------------------|------------------|----------|--------------------|-------------------|----------------|------------------|--------------------|------------------|---|
| 1 | 58.028740          | 29.518008         |                |                  |                   |                  | <b>G</b> |                    |                   |                |                  |                    |                  | 8 |
| 2 | <b>155.081504</b>  | 78.044390         |                |                  |                   |                  | <b>P</b> | 1153.628558        | <b>577.317917</b> | 1136.602009    | 568.804643       | 1135.617993        | 568.312635       | 7 |
| 3 | <b>268.165568</b>  | 134.586422        |                |                  |                   |                  | <b>L</b> | <b>1056.575794</b> | 528.791535        | 1039.549245    | 520.278261       | <b>1038.565229</b> | 519.786253       | 6 |
| 4 | <b>383.192511</b>  | 192.099894        |                |                  | 365.181946        | 183.094611       | <b>D</b> | <b>943.491730</b>  | 472.249503        | 926.465181     | 463.736228       | <b>925.481165</b>  | 463.244220       | 5 |
| 5 | <b>822.417837</b>  | 411.712557        | 805.391288     | 403.199282       | <b>804.407272</b> | 402.707274       | <b>Q</b> | <b>828.464787</b>  | 414.736032        | 811.438238     | 406.222757       | <b>810.454222</b>  | 405.730749       | 4 |
| 6 | <b>935.501901</b>  | <b>468.254589</b> | 918.475352     | 459.741314       | <b>917.491336</b> | 459.249306       | <b>L</b> | 389.239461         | 195.123368        | 372.212912     | 186.610094       | 371.228896         | 186.118086       | 3 |
| 7 | <b>1064.544494</b> | 532.775885        | 1047.517945    | 524.262611       | 1046.533929       | 523.770603       | <b>E</b> | 276.155397         | 138.581336        | 259.128848     | 130.068062       | <b>258.144832</b>  | 129.576054       | 2 |
| 8 |                    |                   |                |                  |                   |                  | <b>K</b> | <b>147.112804</b>  | 74.060040         | 130.086255     | 65.546765        |                    |                  | 1 |

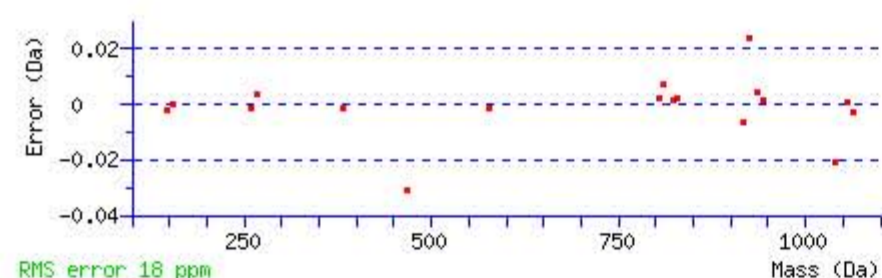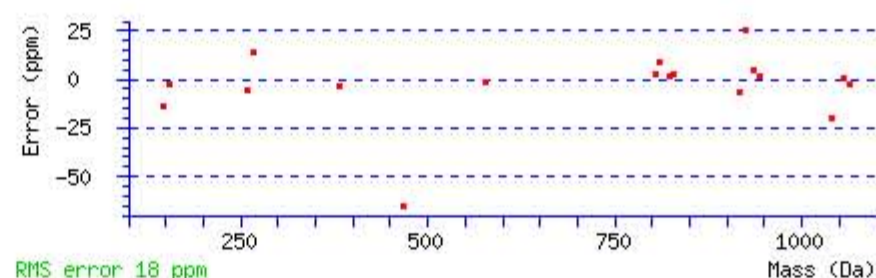

NCBI BLAST search of [GPLDQLEK](#)

(Parameters: blastp, nr protein database, expect=20000, no filter, PAM30)

Other BLAST [web gateways](#)

All matches to this query

| Score | Mr(calc):   | Delta     | Sequence                    |
|-------|-------------|-----------|-----------------------------|
| 31.5  | 1209.642731 | -0.001803 | <a href="#">GPLDQLEK</a>    |
| 9.1   | 1209.646545 | -0.005617 | <a href="#">EHNRLATELK</a>  |
| 9.0   | 1209.628799 | 0.012129  | <a href="#">TRFRIEMNK</a>   |
| 4.3   | 1209.628815 | 0.012113  | <a href="#">GLGHMPRAVEK</a> |
| 2.0   | 1209.642731 | -0.001803 | <a href="#">GTGEFIKALMK</a> |
| 0.4   | 1209.635330 | 0.005598  | <a href="#">GPLAIREDPK</a>  |

Mascot: <http://www.matrixscience.com/>

# MASCOT Search Results

## Peptide View

MS/MS Fragmentation of **TLEAQLTPR**

Found in **HEP2\_HUMAN**, Heparin cofactor 2 OS=Homo sapiens GN=SERPIND1 PE=1 SV=3

Match to Query 21093: 1338.722428 from(670.368490,2+) rtinseconds(1974) index(31671)

Title: Locus:1.1.1.3351.11 File:"2013-07-02 CLN FXIII 180 min 3rd F 3.wiff"

Data file C:\Program Files (x86)\Matrix Science\Mascot Daemon\mgf\9 FXIII 180 min 3rd\mascot\_daemon\_merge.mgf

Click mouse within plot area to zoom in by factor of two about that point

Or, Plot from  to  Da

Label all possible matches  Label matches used for scoring

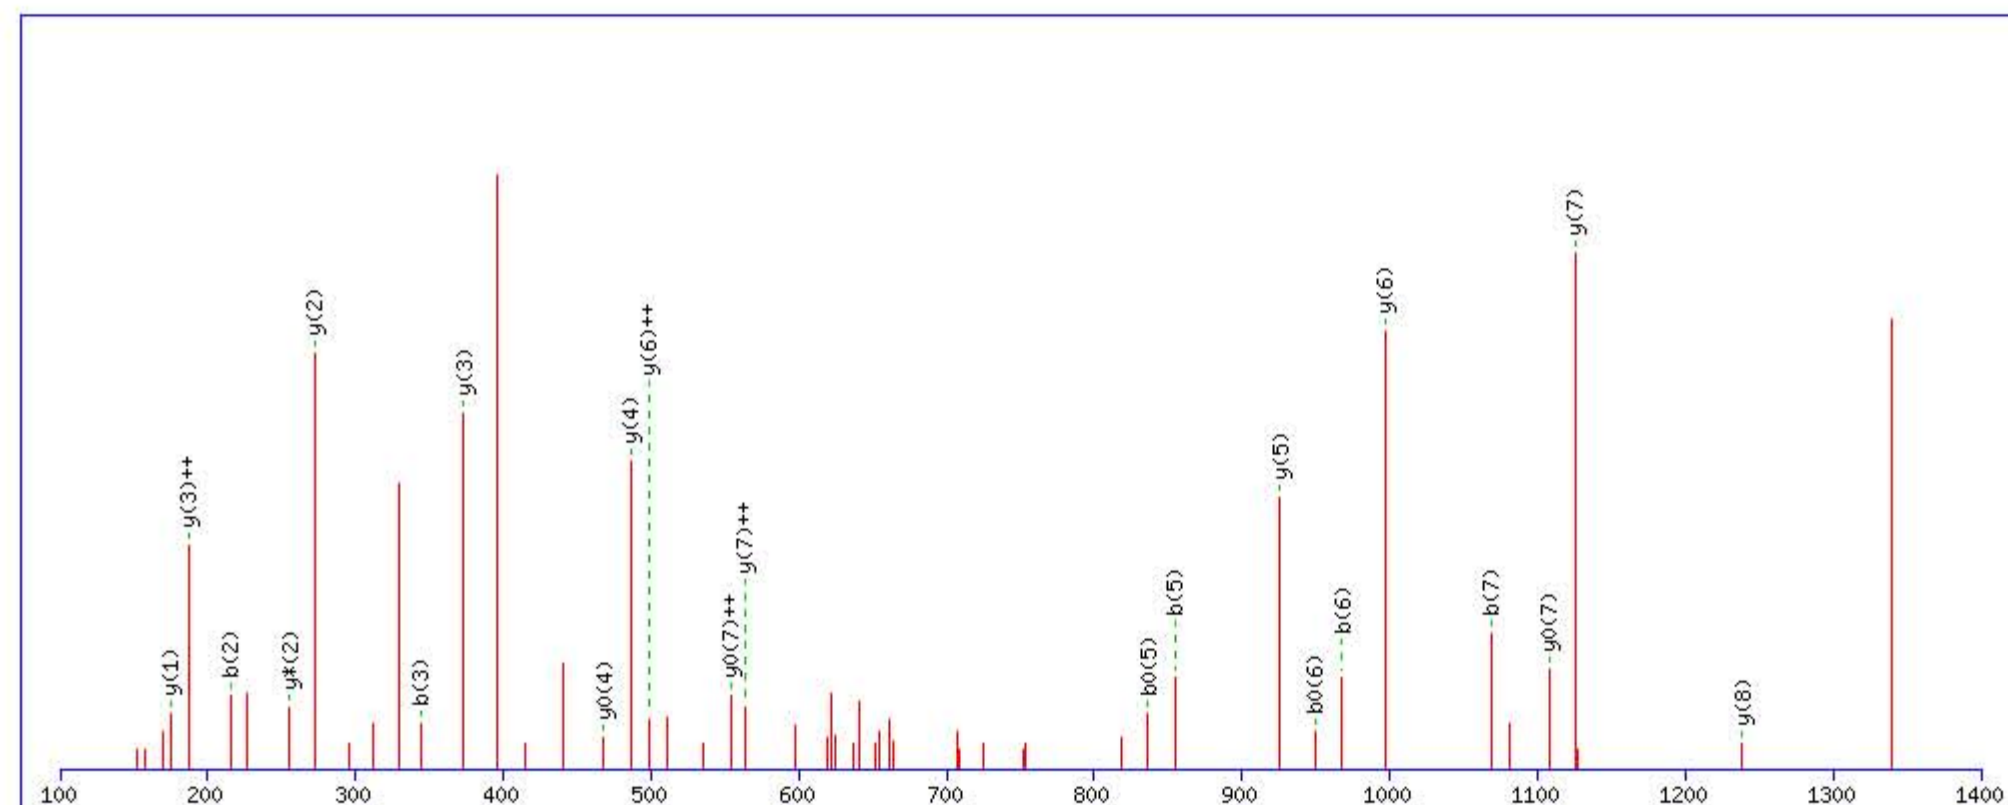

Monoisotopic mass of neutral peptide Mr(calc): 1338.732941

Fixed modifications: Carbamidomethyl (C) (apply to specified residues or termini only)

Variable modifications:

Q5 : Biotin:Thermo-21345 (Q)

Ions Score: 53 Expect: 8.8e-005

Matches : 22/84 fragment ions using 37 most intense peaks [\(help\)](#)

| # | b                  | b <sup>++</sup> | b <sup>+</sup> | b <sup>+++</sup> | b <sup>0</sup>    | b <sup>0++</sup> | Seq. | y                  | y <sup>++</sup>   | y <sup>+</sup>    | y <sup>+++</sup> | y <sup>0</sup>     | y <sup>0++</sup>  | # |
|---|--------------------|-----------------|----------------|------------------|-------------------|------------------|------|--------------------|-------------------|-------------------|------------------|--------------------|-------------------|---|
| 1 | 102.054955         | 51.531116       |                |                  | 84.044390         | 42.525833        | T    |                    |                   |                   |                  |                    |                   | 9 |
| 2 | <b>215.139019</b>  | 108.073147      |                |                  | 197.128454        | 99.067865        | L    | <b>1238.692556</b> | 619.849916        | 1221.666007       | 611.336642       | 1220.681991        | 610.844633        | 8 |
| 3 | <b>344.181612</b>  | 172.594444      |                |                  | 326.171047        | 163.589162       | E    | <b>1125.608492</b> | <b>563.307884</b> | 1108.581943       | 554.794610       | <b>1107.597927</b> | <b>554.302602</b> | 7 |
| 4 | 415.218726         | 208.113001      |                |                  | 397.208161        | 199.107719       | A    | <b>996.565899</b>  | <b>498.786588</b> | 979.539350        | 490.273313       | 978.555334         | 489.781305        | 6 |
| 5 | <b>854.444052</b>  | 427.725664      | 837.417503     | 419.212390       | <b>836.433487</b> | 418.720382       | Q    | <b>925.528785</b>  | 463.268031        | 908.502236        | 454.754756       | 907.518220         | 454.262748        | 5 |
| 6 | <b>967.528116</b>  | 484.267696      | 950.501567     | 475.754422       | <b>949.517551</b> | 475.262414       | L    | <b>486.303459</b>  | 243.655367        | 469.276910        | 235.142093       | <b>468.292894</b>  | 234.650085        | 4 |
| 7 | <b>1068.575795</b> | 534.791536      | 1051.549246    | 526.278261       | 1050.565230       | 525.786253       | T    | <b>373.219395</b>  | <b>187.113335</b> | 356.192846        | 178.600061       | 355.208830         | 178.108053        | 3 |
| 8 | 1165.628559        | 583.317918      | 1148.602010    | 574.804643       | 1147.617994       | 574.312635       | P    | <b>272.171716</b>  | 136.589496        | <b>255.145167</b> | 128.076221       |                    |                   | 2 |
| 9 |                    |                 |                |                  |                   |                  | R    | <b>175.118952</b>  | 88.063114         | 158.092403        | 79.549839        |                    |                   | 1 |

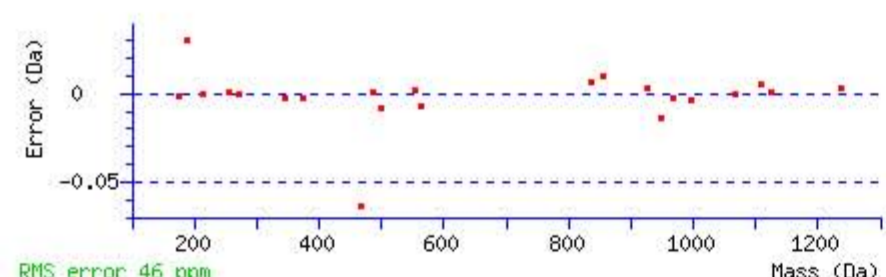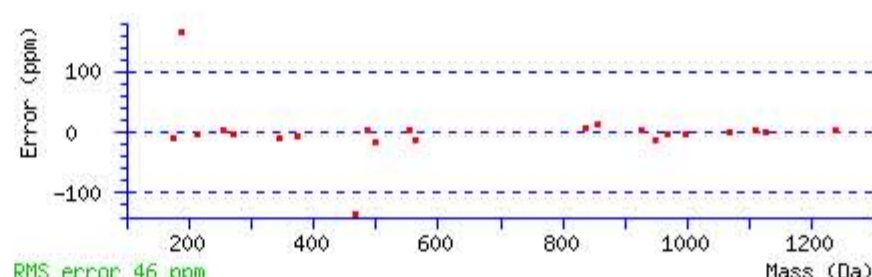

NCBI BLAST search of **TLEAQLTPR**

(Parameters: blastp, nr protein database, expect=20000, no filter, PAM30)

Other BLAST [web gateways](#)

All matches to this query

| Score | Mr(calc):   | Delta     | Sequence                     |
|-------|-------------|-----------|------------------------------|
| 53.2  | 1338.732941 | -0.010513 | <a href="#">TLEAQLTPR</a>    |
| 10.4  | 1338.711639 | 0.010789  | <a href="#">DVPQAEVGRGR</a>  |
| 9.9   | 1338.732956 | -0.010528 | <a href="#">VDLQSLPTR</a>    |
| 9.6   | 1338.725555 | -0.003127 | <a href="#">VDTVAEHLTRK</a>  |
| 5.4   | 1338.707809 | 0.014619  | <a href="#">TLRPSLCPGGGK</a> |
| 2.9   | 1338.715179 | 0.007249  | <a href="#">QISTLAMHK</a>    |
| 0.3   | 1338.732941 | -0.010513 | <a href="#">TDRIYAMKVVK</a>  |

# MASCOT Search Results

## Peptide View

MS/MS Fragmentation of **SVNDLYIQK**

Found in **HEP2\_HUMAN**, Heparin cofactor 2 OS=Homo sapiens GN=SERPIND1 PE=1 SV=3

Match to Query 23260: 1389.727548 from(695.871050,2+) rtinseconds(1978) index(31697)

Title: Locus:1.1.1.3352.17 File:"2013-07-02 CLN FXIII 180 min 3rd F 3.wiff"

Data file C:\Program Files (x86)\Matrix Science\Mascot Daemon\mgf\9 FXIII 180 min 3rd\mascot\_daemon\_merge.mgf

Click mouse within plot area to zoom in by factor of two about that point

Or, Plot from  to  Da

Label all possible matches  Label matches used for scoring

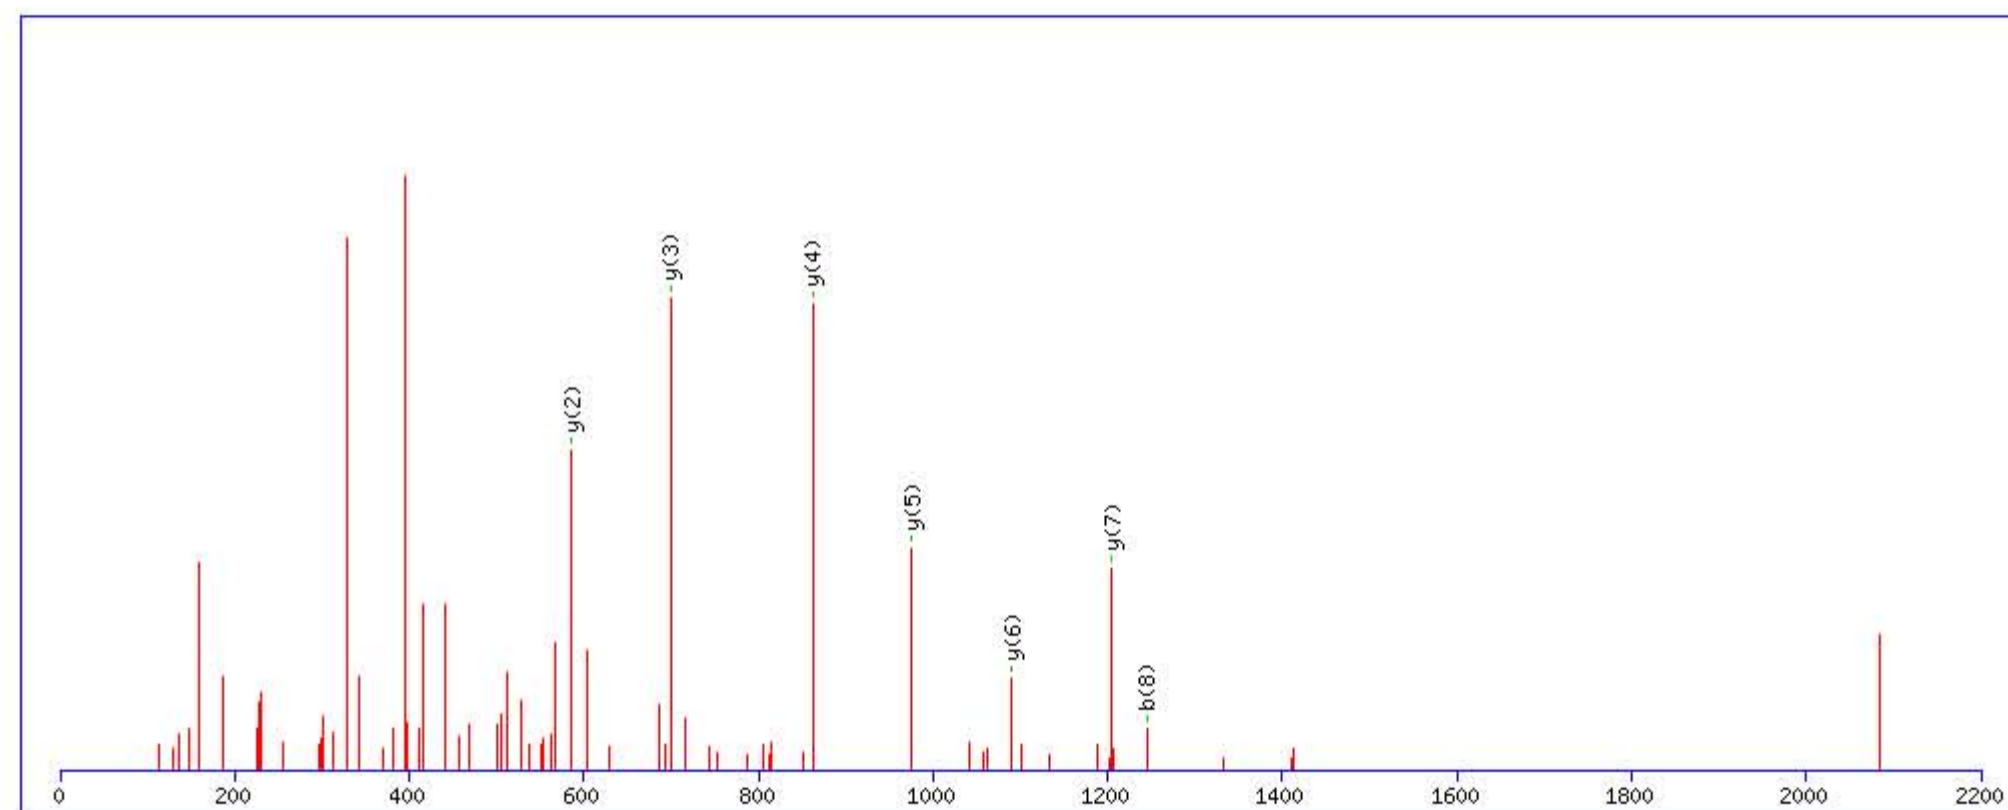

Monoisotopic mass of neutral peptide Mr(calc): 1389.732605

Fixed modifications: Carbamidomethyl (C) (apply to specified residues or termini only)

Variable modifications:

Q8 : Biotin:Thermo-21345 (Q)

Ions Score: 36 Expect: 0.00099

Matches : 7/82 fragment ions using 13 most intense peaks [\(help\)](#)

| # | b                  | b <sup>++</sup> | b <sup>*</sup> | b <sup>*++</sup> | b <sup>0</sup> | b <sup>0++</sup> | Seq. | y                  | y <sup>++</sup> | y <sup>*</sup> | y <sup>*++</sup> | y <sup>0</sup> | y <sup>0++</sup> | # |
|---|--------------------|-----------------|----------------|------------------|----------------|------------------|------|--------------------|-----------------|----------------|------------------|----------------|------------------|---|
| 1 | 88.039304          | 44.523290       |                |                  | 70.028739      | 35.518008        | S    |                    |                 |                |                  |                |                  | 9 |
| 2 | 187.107718         | 94.057497       |                |                  | 169.097153     | 85.052214        | V    | 1303.707871        | 652.357573      | 1286.681322    | 643.844299       | 1285.697306    | 643.352291       | 8 |
| 3 | 301.150645         | 151.078960      | 284.124096     | 142.565686       | 283.140080     | 142.073678       | N    | <b>1204.639457</b> | 602.823367      | 1187.612908    | 594.310092       | 1186.628892    | 593.818084       | 7 |
| 4 | 416.177588         | 208.592432      | 399.151039     | 200.079158       | 398.167023     | 199.587150       | D    | <b>1090.596530</b> | 545.801903      | 1073.569981    | 537.288629       | 1072.585965    | 536.796621       | 6 |
| 5 | 529.261652         | 265.134464      | 512.235103     | 256.621190       | 511.251087     | 256.129182       | L    | <b>975.569587</b>  | 488.288432      | 958.543038     | 479.775157       |                |                  | 5 |
| 6 | 692.324981         | 346.666129      | 675.298432     | 338.152854       | 674.314416     | 337.660846       | Y    | <b>862.485523</b>  | 431.746400      | 845.458974     | 423.233125       |                |                  | 4 |
| 7 | 805.409045         | 403.208161      | 788.382496     | 394.694886       | 787.398480     | 394.202878       | I    | <b>699.422194</b>  | 350.214735      | 682.395645     | 341.701461       |                |                  | 3 |
| 8 | <b>1244.634371</b> | 622.820823      | 1227.607822    | 614.307549       | 1226.623806    | 613.815541       | Q    | <b>586.338130</b>  | 293.672703      | 569.311581     | 285.159428       |                |                  | 2 |
| 9 |                    |                 |                |                  |                |                  | K    | 147.112804         | 74.060040       | 130.086255     | 65.546765        |                |                  | 1 |

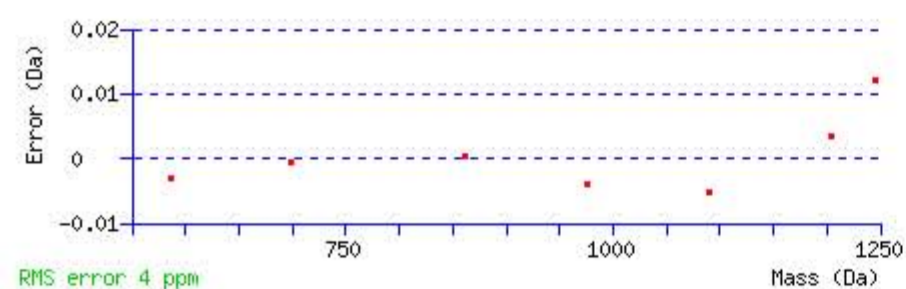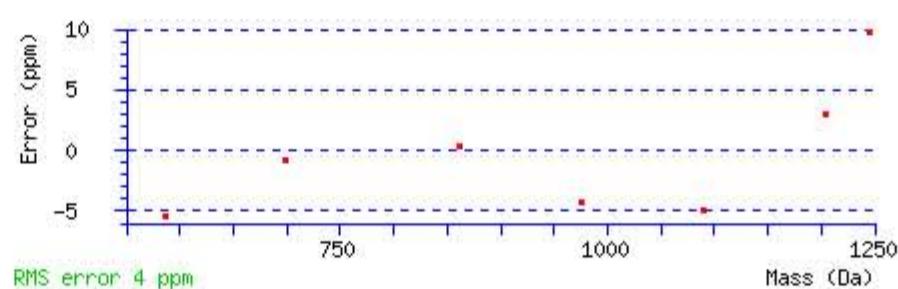

NCBI BLAST search of **SVNDLYIQK**

(Parameters: blastp, nr protein database, expect=20000, no filter, PAM30)

Other BLAST [web gateways](#)

## All matches to this query

| Score | Mr(calc):   | Delta     | Sequence                       |
|-------|-------------|-----------|--------------------------------|
| 36.2  | 1389.732605 | -0.005057 | <a href="#">SVNDLYIQK</a>      |
| 3.9   | 1389.707458 | 0.020090  | <a href="#">TKSMFQRITYK</a>    |
| 1.9   | 1389.735062 | -0.007514 | <a href="#">ISEAKEELKESK</a>   |
| 1.7   | 1389.746323 | -0.018775 | <a href="#">TAKATLEQDSAkk</a>  |
| 1.6   | 1389.713989 | 0.013559  | <a href="#">LLPEPGPSDSPGPK</a> |
| 0.6   | 1389.728577 | -0.001029 | <a href="#">NMLTESLVALQR</a>   |



# MASCOT Search Results

## Peptide View

MS/MS Fragmentation of **GGETAQSADPQWEQLNKK**

Found in **HEP2\_HUMAN**, Heparin cofactor 2 OS=Homo sapiens GN=SERPIND1 PE=1 SV=3

Match to Query 44775: 2283.047412 from(762.023080,3+) rtinseconds(1944) index(31422)

Title: Locus:1.1.1.3340.23 File:"2013-07-02 CLN FXIII 180 min 3rd F 3.wiff"

Data file C:\Program Files (x86)\Matrix Science\Mascot Daemon\mgf9 FXIII 180 min 3rd\mascot\_daemon\_merge.mgf

Click mouse within plot area to zoom in by factor of two about that point

Or, Plot from  to  Da

Label all possible matches  Label matches used for scoring

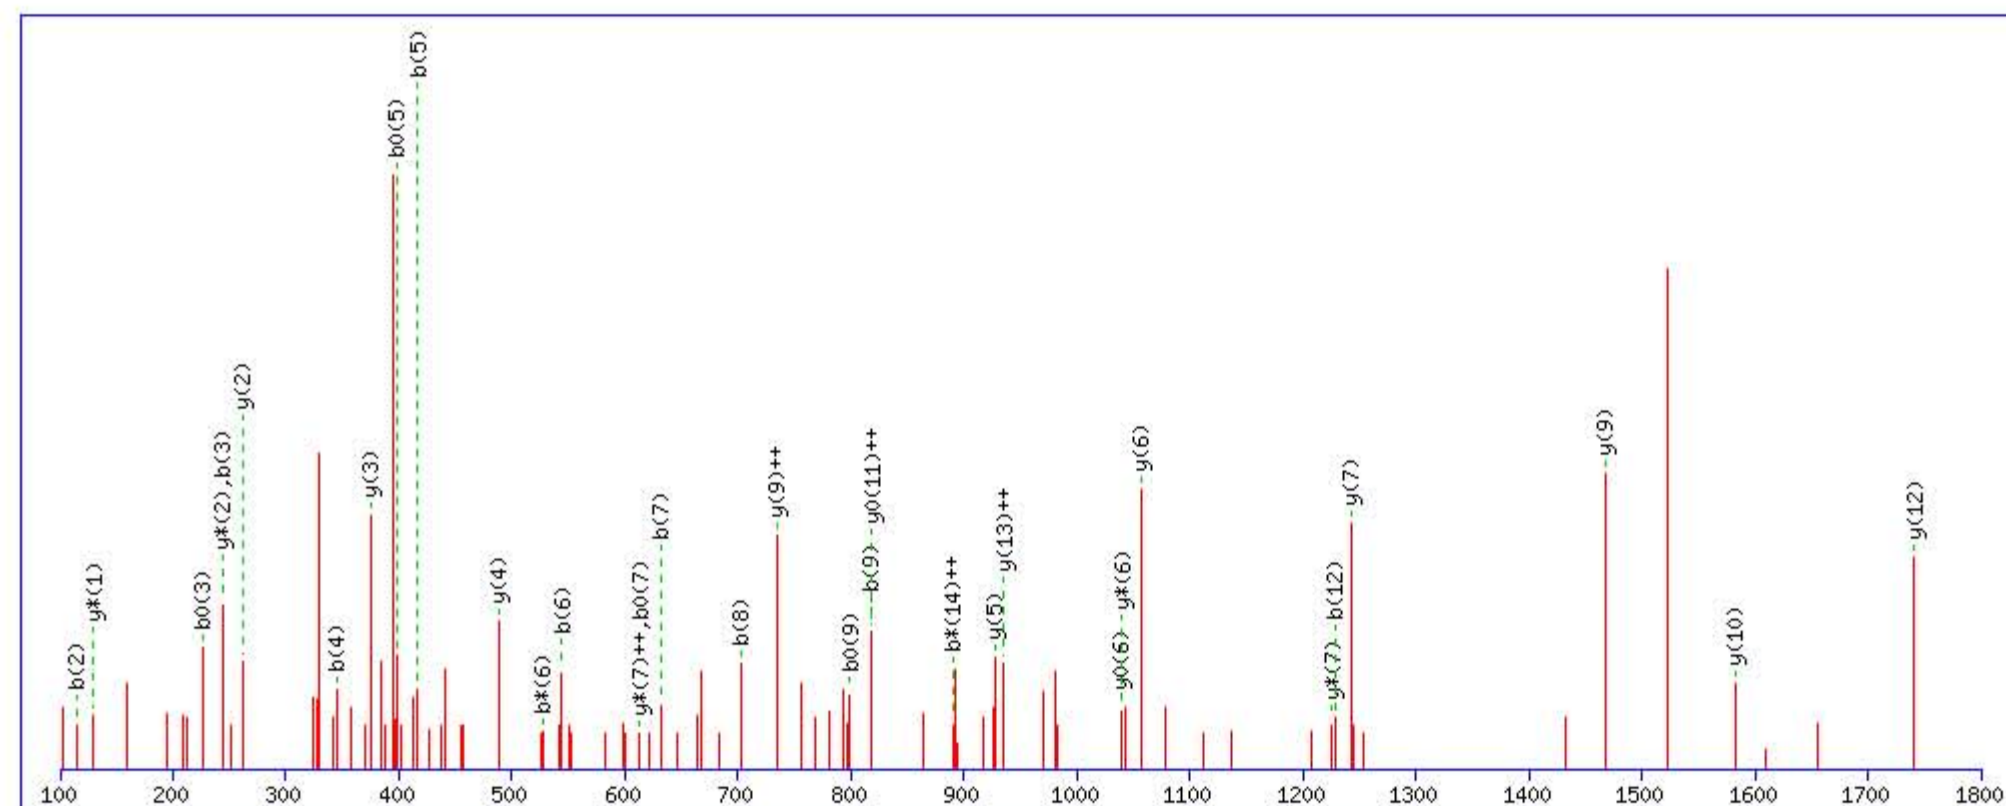

Monoisotopic mass of neutral peptide Mr(calc): 2283.058975  
 Fixed modifications: Carbamidomethyl (C) (apply to specified residues or termini only)  
 Variable modifications:  
 Q14 : Biotin:Thermo-21345 (Q)  
 Ions Score: 43 Expect: 0.00052  
 Matches : 33/180 fragment ions using 75 most intense peaks [\(help\)](#)

| #  | b                  | b <sup>++</sup> | b <sup>*</sup>    | b <sup>*++</sup>  | b <sup>0</sup>    | b <sup>0++</sup> | Seq. | y                  | y <sup>++</sup>   | y <sup>*</sup>     | y <sup>*++</sup>  | y <sup>0</sup>     | y <sup>0++</sup>  | #  |
|----|--------------------|-----------------|-------------------|-------------------|-------------------|------------------|------|--------------------|-------------------|--------------------|-------------------|--------------------|-------------------|----|
| 1  | 58.028740          | 29.518008       |                   |                   |                   |                  | G    |                    |                   |                    |                   |                    |                   | 18 |
| 2  | <b>115.050204</b>  | 58.028740       |                   |                   |                   |                  | G    | 2227.044809        | 1114.026042       | 2210.018260        | 1105.512768       | 2209.034244        | 1105.020760       | 17 |
| 3  | <b>244.092797</b>  | 122.550037      |                   |                   | <b>226.082232</b> | 113.544754       | E    | 2170.023345        | 1085.515310       | 2152.996796        | 1077.002036       | 2152.012780        | 1076.510028       | 16 |
| 4  | <b>345.140476</b>  | 173.073876      |                   |                   | 327.129911        | 164.068594       | T    | 2040.980752        | 1020.994014       | 2023.954203        | 1012.480740       | 2022.970187        | 1011.988732       | 15 |
| 5  | <b>416.177590</b>  | 208.592433      |                   |                   | <b>398.167025</b> | 199.587151       | A    | 1939.933073        | 970.470175        | 1922.906524        | 961.956900        | 1921.922508        | 961.464892        | 14 |
| 6  | <b>544.236168</b>  | 272.621722      | <b>527.209619</b> | 264.108448        | 526.225603        | 263.616440       | Q    | 1868.895959        | <b>934.951618</b> | 1851.869410        | 926.438343        | 1850.885394        | 925.946335        | 13 |
| 7  | <b>631.268196</b>  | 316.137736      | 614.241647        | 307.624462        | <b>613.257631</b> | 307.132454       | S    | <b>1740.837381</b> | 870.922329        | 1723.810832        | 862.409054        | 1722.826816        | 861.917046        | 12 |
| 8  | <b>702.305310</b>  | 351.656293      | 685.278761        | 343.143019        | 684.294745        | 342.651011       | A    | 1653.805353        | 827.406315        | 1636.778804        | 818.893040        | 1635.794788        | <b>818.401032</b> | 11 |
| 9  | <b>817.332253</b>  | 409.169765      | 800.305704        | 400.656490        | <b>799.321688</b> | 400.164482       | D    | <b>1582.768239</b> | 791.887758        | 1565.741690        | 783.374483        | 1564.757674        | 782.882475        | 10 |
| 10 | 914.385017         | 457.696147      | 897.358468        | 449.182872        | 896.374452        | 448.690864       | P    | <b>1467.741296</b> | <b>734.374286</b> | 1450.714747        | 725.861012        | 1449.730731        | 725.369004        | 9  |
| 11 | 1042.443595        | 521.725436      | 1025.417046       | 513.212161        | 1024.433030       | 512.720153       | Q    | 1370.688532        | 685.847904        | 1353.661983        | 677.334630        | 1352.677967        | 676.842622        | 8  |
| 12 | <b>1228.522908</b> | 614.765092      | 1211.496359       | 606.251818        | 1210.512343       | 605.759809       | W    | <b>1242.629954</b> | 621.818615        | <b>1225.603405</b> | <b>613.305341</b> | 1224.619389        | 612.813333        | 7  |
| 13 | 1357.565501        | 679.286388      | 1340.538952       | 670.773114        | 1339.554936       | 670.281106       | E    | <b>1056.550641</b> | 528.778959        | <b>1039.524092</b> | 520.265684        | <b>1038.540076</b> | 519.773676        | 6  |
| 14 | 1796.790827        | 898.899052      | 1779.764278       | <b>890.385777</b> | 1778.780262       | 889.893769       | Q    | <b>927.508048</b>  | 464.257662        | 910.481499         | 455.744388        |                    |                   | 5  |
| 15 | 1909.874891        | 955.441083      | 1892.848342       | 946.927809        | 1891.864326       | 946.435801       | L    | <b>488.282722</b>  | 244.644999        | 471.256173         | 236.131725        |                    |                   | 4  |
| 16 | 2023.917818        | 1012.462547     | 2006.891269       | 1003.949273       | 2005.907253       | 1003.457265      | N    | <b>375.198658</b>  | 188.102967        | 358.172109         | 179.589693        |                    |                   | 3  |
| 17 | 2137.960745        | 1069.484010     | 2120.934196       | 1060.970736       | 2119.950180       | 1060.478728      | N    | <b>261.155731</b>  | 131.081504        | <b>244.129182</b>  | 122.568229        |                    |                   | 2  |
| 18 |                    |                 |                   |                   |                   |                  | K    | 147.112804         | 74.060040         | <b>130.086255</b>  | 65.546765         |                    |                   | 1  |

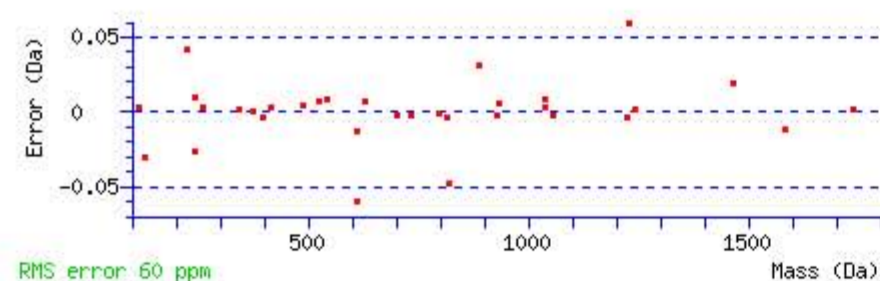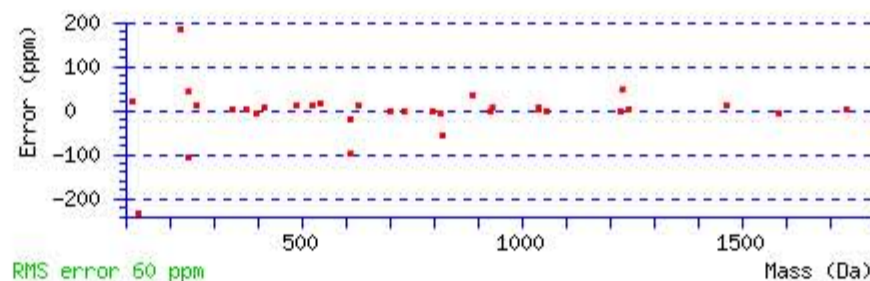

NCBI BLAST search of **GGETAQSADPQWEQLNKK**  
 (Parameters: blastp, nr protein database, expect=20000, no filter, PAM30)  
 Other BLAST [web gateways](#)

### All matches to this query

| Score | Mr(calc):   | Delta     | Sequence                           |
|-------|-------------|-----------|------------------------------------|
| 43.3  | 2283.058975 | -0.011563 | <a href="#">GGETAQSADPQWEQLNKK</a> |
| 20.9  | 2283.058975 | -0.011563 | <a href="#">GGETAQSADPQWEQLNKK</a> |

# MASCOT Search Results

## Peptide View

MS/MS Fragmentation of **GGETAQSADPQWEQLNNK**

Found in **HEP2\_HUMAN**, Heparin cofactor 2 OS=Homo sapiens GN=SERPIND1 PE=1 SV=3

Match to Query 44777: 2283.055422 from(762.025750,3+) rtinseconds(1927) index(31288)

Title: Locus:1.1.1.3334.24 File:"2013-07-02 CLN FXIII 180 min 3rd F 3.wiff"

Data file C:\Program Files (x86)\Matrix Science\Mascot Daemon\mgf9 FXIII 180 min 3rd\mascot\_daemon\_merge.mgf

Click mouse within plot area to zoom in by factor of two about that point

Or, Plot from  to  Da

Label all possible matches  Label matches used for scoring

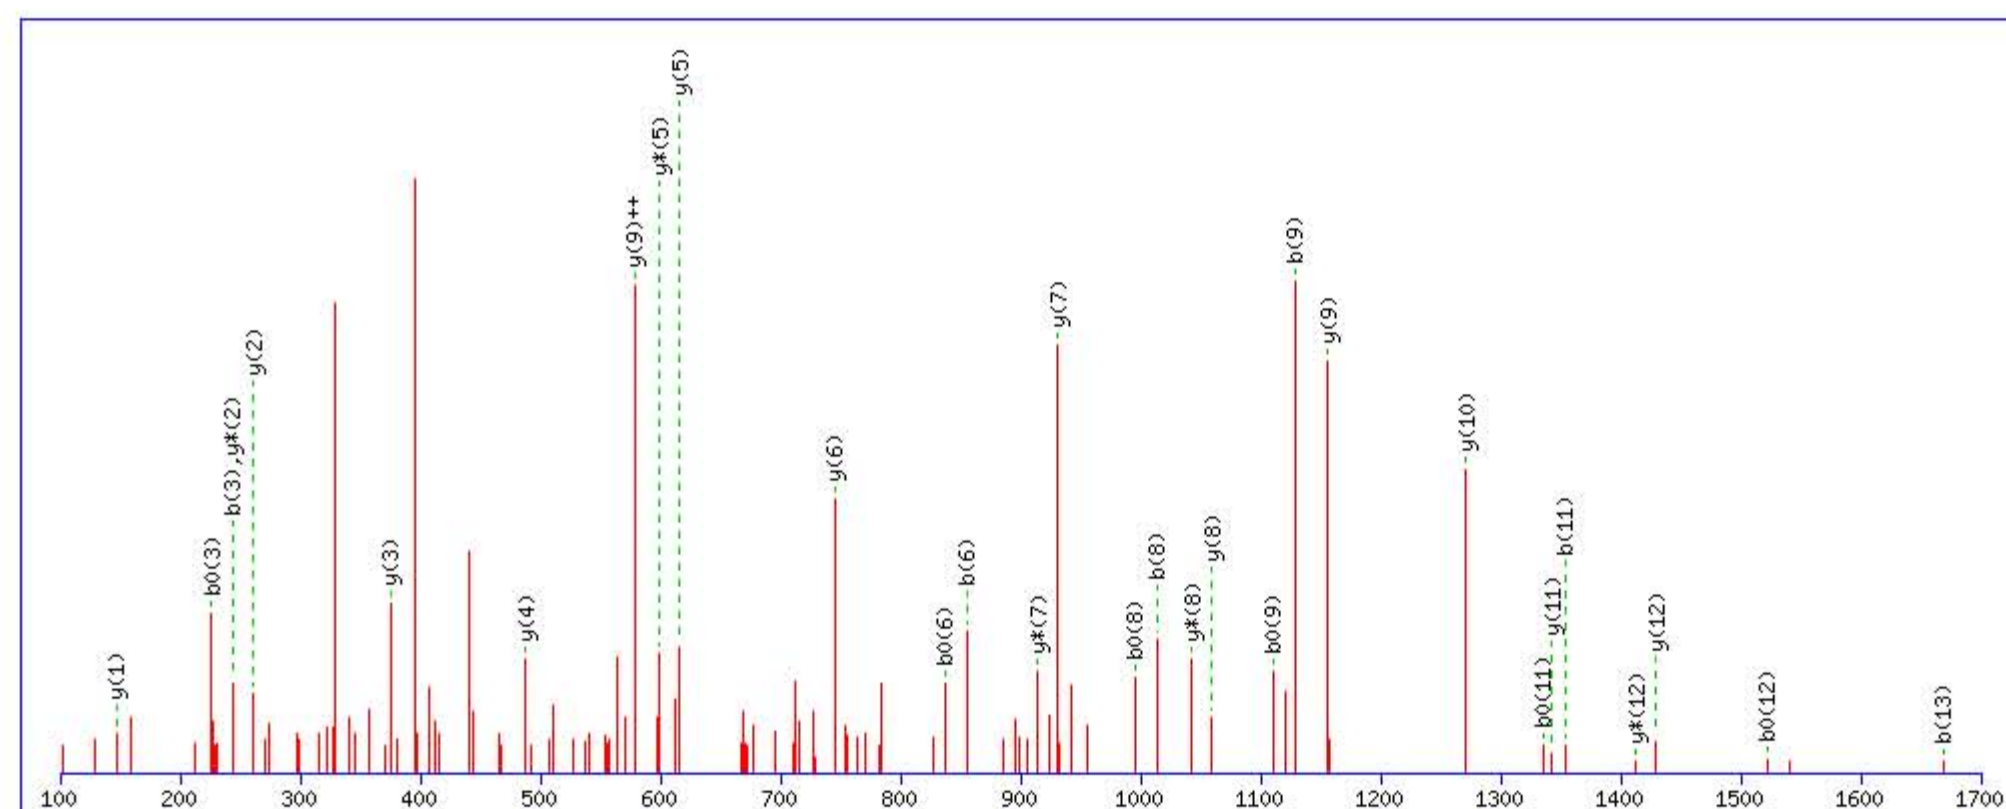

Monoisotopic mass of neutral peptide Mr(calc): 2283.058975

Fixed modifications: Carbamidomethyl (C) (apply to specified residues or termini only)

Variable modifications:

Q6 : Biotin:Thermo-21345 (Q)

Ions Score: 83 Expect: 5.9e-008

Matches : 30/180 fragment ions using 42 most intense peaks [\(help\)](#)

| #  | b                  | b <sup>++</sup> | b <sup>*</sup> | b <sup>*++</sup> | b <sup>0</sup>     | b <sup>0++</sup> | Seq. | y                  | y <sup>++</sup>   | y <sup>*</sup>     | y <sup>*++</sup> | y <sup>0</sup> | y <sup>0++</sup> | #  |
|----|--------------------|-----------------|----------------|------------------|--------------------|------------------|------|--------------------|-------------------|--------------------|------------------|----------------|------------------|----|
| 1  | 58.028740          | 29.518008       |                |                  |                    |                  | G    |                    |                   |                    |                  |                |                  | 18 |
| 2  | 115.050204         | 58.028740       |                |                  |                    |                  | G    | 2227.044809        | 1114.026042       | 2210.018260        | 1105.512768      | 2209.034244    | 1105.020760      | 17 |
| 3  | <b>244.092797</b>  | 122.550037      |                |                  | <b>226.082232</b>  | 113.544754       | E    | 2170.023345        | 1085.515310       | 2152.996796        | 1077.002036      | 2152.012780    | 1076.510028      | 16 |
| 4  | 345.140476         | 173.073876      |                |                  | 327.129911         | 164.068594       | T    | 2040.980752        | 1020.994014       | 2023.954203        | 1012.480740      | 2022.970187    | 1011.988732      | 15 |
| 5  | 416.177590         | 208.592433      |                |                  | 398.167025         | 199.587151       | A    | 1939.933073        | 970.470175        | 1922.906524        | 961.956900       | 1921.922508    | 961.464892       | 14 |
| 6  | <b>855.402916</b>  | 428.205096      | 838.376367     | 419.691822       | <b>837.392351</b>  | 419.199814       | Q    | 1868.895959        | 934.951618        | 1851.869410        | 926.438343       | 1850.885394    | 925.946335       | 13 |
| 7  | 942.434944         | 471.721110      | 925.408395     | 463.207836       | 924.424379         | 462.715828       | S    | <b>1429.670633</b> | 715.338955        | <b>1412.644084</b> | 706.825680       | 1411.660068    | 706.333672       | 12 |
| 8  | <b>1013.472058</b> | 507.239667      | 996.445509     | 498.726393       | <b>995.461493</b>  | 498.234385       | A    | <b>1342.638605</b> | 671.822941        | 1325.612056        | 663.309666       | 1324.628040    | 662.817658       | 11 |
| 9  | <b>1128.499001</b> | 564.753139      | 1111.472452    | 556.239864       | <b>1110.488436</b> | 555.747856       | D    | <b>1271.601491</b> | 636.304384        | 1254.574942        | 627.791109       | 1253.590926    | 627.299101       | 10 |
| 10 | 1225.551765        | 613.279521      | 1208.525216    | 604.766246       | 1207.541200        | 604.274238       | P    | <b>1156.574548</b> | <b>578.790912</b> | 1139.547999        | 570.277638       | 1138.563983    | 569.785630       | 9  |
| 11 | <b>1353.610343</b> | 677.308810      | 1336.583794    | 668.795535       | <b>1335.599778</b> | 668.303527       | Q    | <b>1059.521784</b> | 530.264530        | <b>1042.495235</b> | 521.751256       | 1041.511219    | 521.259248       | 8  |
| 12 | 1539.689656        | 770.348466      | 1522.663107    | 761.835192       | <b>1521.679091</b> | 761.343184       | W    | <b>931.463206</b>  | 466.235241        | <b>914.436657</b>  | 457.721967       | 913.452641     | 457.229959       | 7  |
| 13 | <b>1668.732249</b> | 834.869762      | 1651.705700    | 826.356488       | 1650.721684        | 825.864480       | E    | <b>745.383893</b>  | 373.195585        | 728.357344         | 364.682310       | 727.373328     | 364.190302       | 6  |
| 14 | 1796.790827        | 898.899052      | 1779.764278    | 890.385777       | 1778.780262        | 889.893769       | Q    | <b>616.341300</b>  | 308.674288        | <b>599.314751</b>  | 300.161014       |                |                  | 5  |
| 15 | 1909.874891        | 955.441083      | 1892.848342    | 946.927809       | 1891.864326        | 946.435801       | L    | <b>488.282722</b>  | 244.644999        | 471.256173         | 236.131725       |                |                  | 4  |
| 16 | 2023.917818        | 1012.462547     | 2006.891269    | 1003.949273      | 2005.907253        | 1003.457265      | N    | <b>375.198658</b>  | 188.102967        | 358.172109         | 179.589693       |                |                  | 3  |
| 17 | 2137.960745        | 1069.484010     | 2120.934196    | 1060.970736      | 2119.950180        | 1060.478728      | N    | <b>261.155731</b>  | 131.081504        | <b>244.129182</b>  | 122.568229       |                |                  | 2  |
| 18 |                    |                 |                |                  |                    |                  | K    | <b>147.112804</b>  | 74.060040         | 130.086255         | 65.546765        |                |                  | 1  |

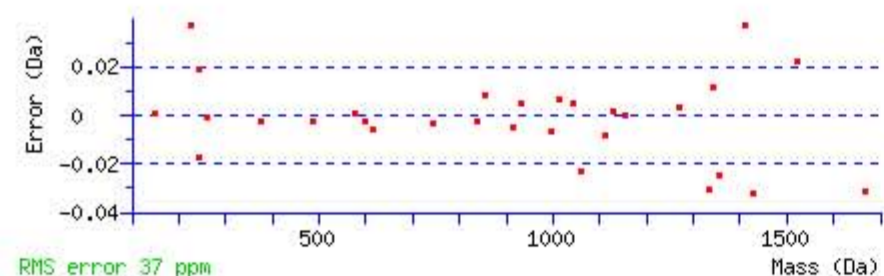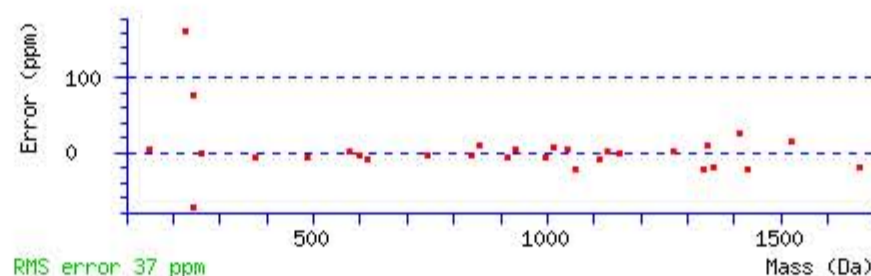

NCBI BLAST search of **GGETAQSADPQWEQLNNK**

(Parameters: blastp, nr protein database, expect=20000, no filter, PAM30)

Other BLAST [web gateways](#)

All matches to this query

| Score | Mr(calc):   | Delta     | Sequence                           |
|-------|-------------|-----------|------------------------------------|
| 83.2  | 2283.058975 | -0.003553 | <a href="#">GGETAQSADPQWEQLNNK</a> |
| 18.6  | 2283.058975 | -0.003553 | <a href="#">GGETAQSADPQWEQLNNK</a> |
| 0.6   | 2283.058975 | -0.003553 | <a href="#">GGETAQSADPQWEQLNNK</a> |

# MASCOT Search Results

## Peptide View

MS/MS Fragmentation of **VQLSPDLLATLPEPASPGR**

Found in **HGFA\_HUMAN**, Hepatocyte growth factor activator OS=Homo sapiens GN=HGFA PE=1 SV=1

Match to Query 44546: 2271.231852 from(758.084560,3+) rtinseconds(2691) index(35753)  
 Title: Locus:1.1.1.3600.16 File:"2013-07-02 CLN FXIII 180 min 3rd F 3.wiff"  
 Data file C:\Program Files (x86)\Matrix Science\Mascot Daemon\mgf9 FXIII 180 min 3rd\mascot\_daemon\_merge.mgf

Click mouse within plot area to zoom in by factor of two about that point  
 Or, Plot from  to  Da   
 Label all possible matches  Label matches used for scoring

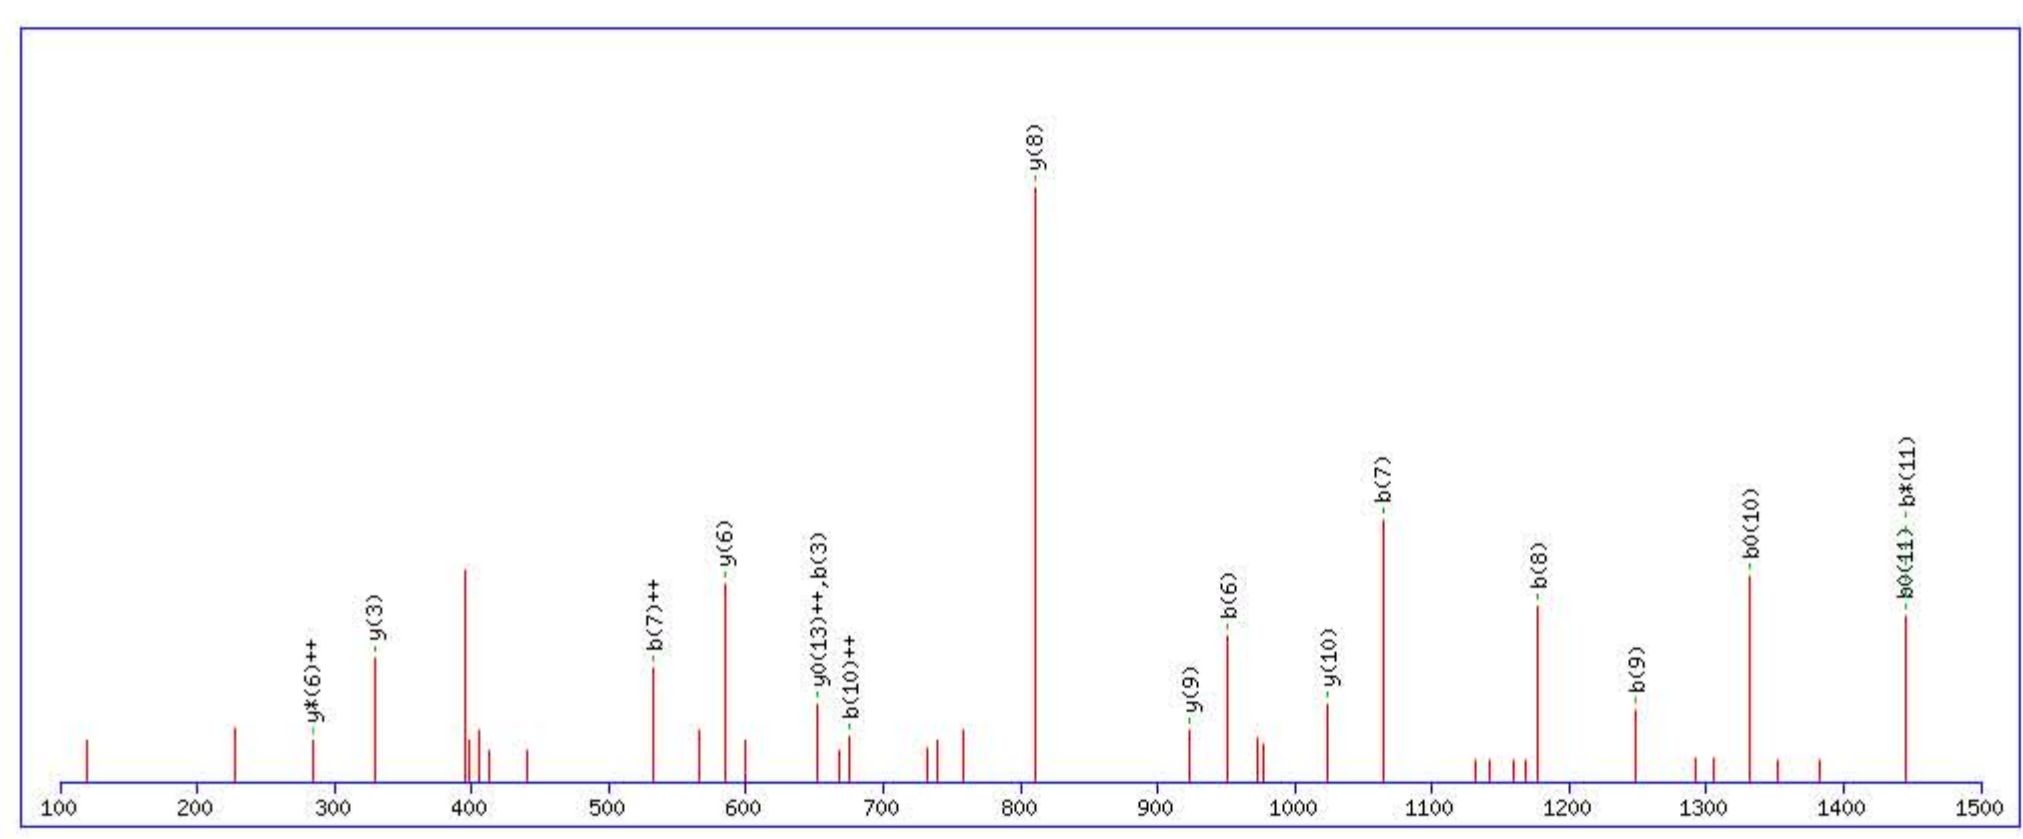

Monoisotopic mass of neutral peptide Mr(calc): 2271.229675  
 Fixed modifications: Carbamidomethyl (C) (apply to specified residues or termini only)  
 Variable modifications:  
 Q2 : Biotin:Thermo-21345 (Q)  
 Ions Score: 39 Expect: 0.0023  
 Matches : 17/202 fragment ions using 24 most intense peaks [\(help\)](#)

| #  | b                  | b <sup>++</sup>   | b <sup>*</sup>     | b <sup>*++</sup> | b <sup>0</sup>     | b <sup>0++</sup> | Seq. | y                  | y <sup>++</sup> | y <sup>*</sup> | y <sup>*++</sup>  | y <sup>0</sup> | y <sup>0++</sup>  | #  |
|----|--------------------|-------------------|--------------------|------------------|--------------------|------------------|------|--------------------|-----------------|----------------|-------------------|----------------|-------------------|----|
| 1  | 100.075690         | 50.541483         |                    |                  |                    |                  | V    |                    |                 |                |                   |                |                   | 19 |
| 2  | 539.301016         | 270.154146        | 522.274467         | 261.640872       |                    |                  | Q    | 2173.168553        | 1087.087914     | 2156.142004    | 1078.574640       | 2155.157988    | 1078.082632       | 18 |
| 3  | <b>652.385080</b>  | 326.696178        | 635.358531         | 318.182904       |                    |                  | L    | 1733.943227        | 867.475252      | 1716.916678    | 858.961977        | 1715.932662    | 858.469969        | 17 |
| 4  | 739.417108         | 370.212192        | 722.390559         | 361.698918       | 721.406543         | 361.206910       | S    | 1620.859163        | 810.933219      | 1603.832614    | 802.419945        | 1602.848598    | 801.927937        | 16 |
| 5  | 836.469872         | 418.738574        | 819.443323         | 410.225300       | 818.459307         | 409.733292       | P    | 1533.827135        | 767.417206      | 1516.800586    | 758.903931        | 1515.816570    | 758.411923        | 15 |
| 6  | <b>951.496815</b>  | 476.252046        | 934.470266         | 467.738771       | 933.486250         | 467.246763       | D    | 1436.774371        | 718.890824      | 1419.747822    | 710.377549        | 1418.763806    | 709.885541        | 14 |
| 7  | <b>1064.580879</b> | <b>532.794078</b> | 1047.554330        | 524.280803       | 1046.570314        | 523.788795       | L    | 1321.747428        | 661.377352      | 1304.720879    | 652.864078        | 1303.736863    | <b>652.372069</b> | 13 |
| 8  | <b>1177.664943</b> | 589.336110        | 1160.638394        | 580.822835       | 1159.654378        | 580.330827       | L    | 1208.663364        | 604.835320      | 1191.636815    | 596.322046        | 1190.652799    | 595.830038        | 12 |
| 9  | <b>1248.702057</b> | 624.854667        | 1231.675508        | 616.341392       | 1230.691492        | 615.849384       | A    | 1095.579300        | 548.293288      | 1078.552751    | 539.780014        | 1077.568735    | 539.288006        | 11 |
| 10 | 1349.749736        | <b>675.378506</b> | 1332.723187        | 666.865232       | <b>1331.739171</b> | 666.373223       | T    | <b>1024.542186</b> | 512.774731      | 1007.515637    | 504.261456        | 1006.531621    | 503.769448        | 10 |
| 11 | 1462.833800        | 731.920538        | <b>1445.807251</b> | 723.407264       | <b>1444.823235</b> | 722.915255       | L    | <b>923.494507</b>  | 462.250892      | 906.467958     | 453.737617        | 905.483942     | 453.245609        | 9  |
| 12 | 1559.886564        | 780.446920        | 1542.860015        | 771.933646       | 1541.875999        | 771.441637       | P    | <b>810.410443</b>  | 405.708860      | 793.383894     | 397.195585        | 792.399878     | 396.703577        | 8  |
| 13 | 1688.929157        | 844.968216        | 1671.902608        | 836.454942       | 1670.918592        | 835.962934       | E    | 713.357679         | 357.182478      | 696.331130     | 348.669203        | 695.347114     | 348.177195        | 7  |
| 14 | 1785.981921        | 893.494598        | 1768.955372        | 884.981324       | 1767.971356        | 884.489316       | P    | <b>584.315086</b>  | 292.661181      | 567.288537     | <b>284.147907</b> | 566.304521     | 283.655899        | 6  |
| 15 | 1857.019035        | 929.013155        | 1839.992486        | 920.499881       | 1839.008470        | 920.007873       | A    | 487.262322         | 244.134799      | 470.235773     | 235.621525        | 469.251757     | 235.129517        | 5  |
| 16 | 1944.051063        | 972.529169        | 1927.024514        | 964.015895       | 1926.040498        | 963.523887       | S    | 416.225208         | 208.616242      | 399.198659     | 200.102968        | 398.214643     | 199.610960        | 4  |
| 17 | 2041.103827        | 1021.055552       | 2024.077278        | 1012.542277      | 2023.093262        | 1012.050269      | P    | <b>329.193180</b>  | 165.100228      | 312.166631     | 156.586954        |                |                   | 3  |
| 18 | 2098.125291        | 1049.566283       | 2081.098742        | 1041.053009      | 2080.114726        | 1040.561001      | G    | 232.140416         | 116.573846      | 215.113867     | 108.060572        |                |                   | 2  |
| 19 |                    |                   |                    |                  |                    |                  | R    | 175.118952         | 88.063114       | 158.092403     | 79.549839         |                |                   | 1  |

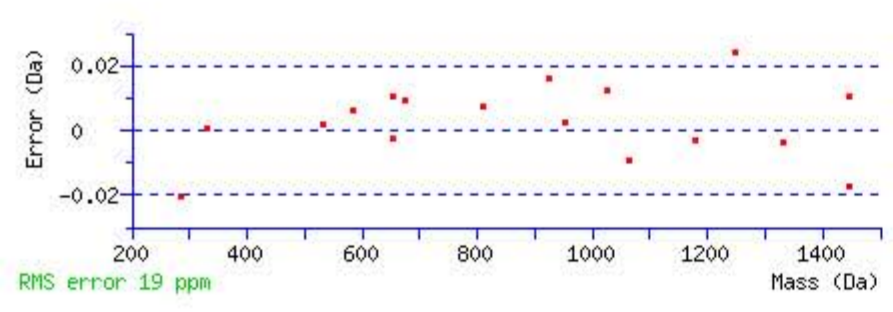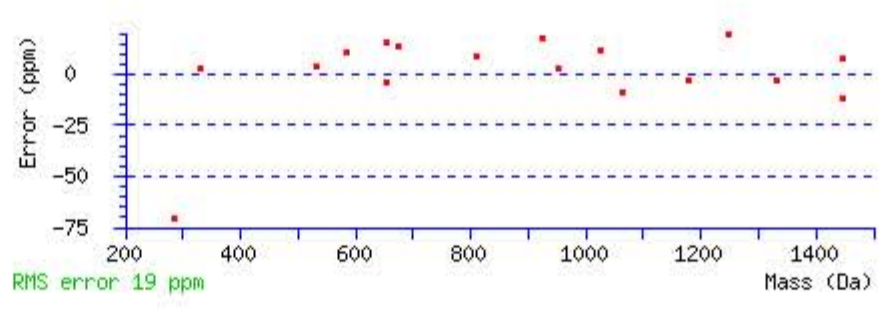

NCBI BLAST search of **VQLSPDLLATLPEPASPGR**  
 (Parameters: blastp, nr protein database, expect=20000, no filter, PAM30)  
 Other BLAST [web gateways](#)

### All matches to this query

| Score | Mr(calc):   | Delta    | Sequence                            |
|-------|-------------|----------|-------------------------------------|
| 39.0  | 2271.229675 | 0.002177 | <a href="#">VQLSPDLLATLPEPASPGR</a> |

# MASCOT SCIENCE Mascot Search Results

## Peptide View

MS/MS Fragmentation of **AAFCYQIR**

Found in **HGFL\_HUMAN**, Hepatocyte growth factor-like protein OS=Homo sapiens GN=MST1 PE=1 SV=2

Match to Query 21088: 1338.669708 from(670.342130,2+) rtinseconds(2035) index(60809)

Title: Locus:1.1.1.1620.8 File:"2013-07-02 CLN FXIII 180 min 3rd FT.wiff"

Data file C:\Program Files (x86)\Matrix Science\Mascot Daemon\mgf9 FXIII 180 min 3rd\mascot\_daemon\_merge.mgf

Click mouse within plot area to zoom in by factor of two about that point

Or, Plot from  to  Da

Label all possible matches  Label matches used for scoring

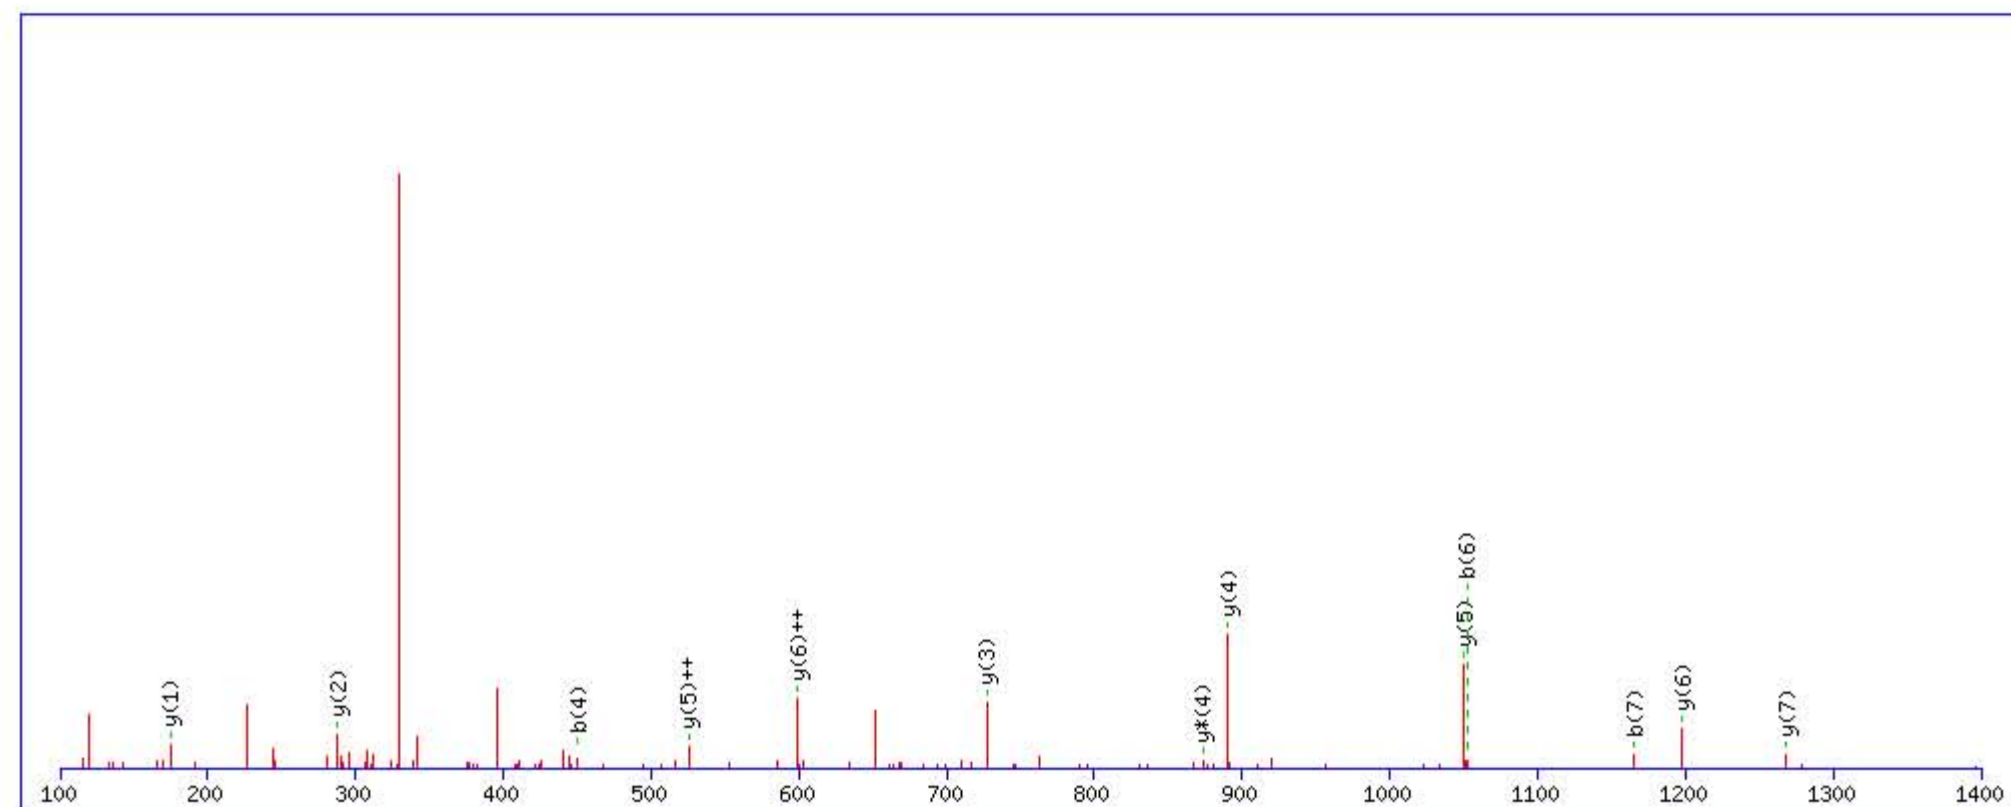

Monoisotopic mass of neutral peptide Mr(calc): 1338.657669

Fixed modifications: Carbamidomethyl (C) (apply to specified residues or termini only)

Variable modifications:

Q6 : Biotin:Thermo-21345 (Q)

Ions Score: 28 Expect: 0.0049

Matches : 13/46 fragment ions using 35 most intense peaks [\(help\)](#)

| # | b                  | b <sup>++</sup> | b <sup>*</sup> | b <sup>***</sup> | Seq. | y                  | y <sup>++</sup>   | y <sup>*</sup>    | y <sup>***</sup> | # |
|---|--------------------|-----------------|----------------|------------------|------|--------------------|-------------------|-------------------|------------------|---|
| 1 | 72.044390          | 36.525833       |                |                  | A    |                    |                   |                   |                  | 8 |
| 2 | 143.081504         | 72.044390       |                |                  | A    | <b>1268.627848</b> | 634.817562        | 1251.601299       | 626.304288       | 7 |
| 3 | 290.149918         | 145.578597      |                |                  | F    | <b>1197.590734</b> | <b>599.299005</b> | 1180.564185       | 590.785731       | 6 |
| 4 | <b>450.180567</b>  | 225.593922      |                |                  | C    | <b>1050.522320</b> | <b>525.764798</b> | 1033.495771       | 517.251524       | 5 |
| 5 | 613.243896         | 307.125586      |                |                  | Y    | <b>890.491671</b>  | 445.749474        | <b>873.465122</b> | 437.236199       | 4 |
| 6 | <b>1052.469222</b> | 526.738249      | 1035.442673    | 518.224975       | Q    | <b>727.428342</b>  | 364.217809        | 710.401793        | 355.704534       | 3 |
| 7 | <b>1165.553286</b> | 583.280281      | 1148.526737    | 574.767007       | I    | <b>288.203016</b>  | 144.605146        | 271.176467        | 136.091871       | 2 |
| 8 |                    |                 |                |                  | R    | <b>175.118952</b>  | 88.063114         | 158.092403        | 79.549839        | 1 |

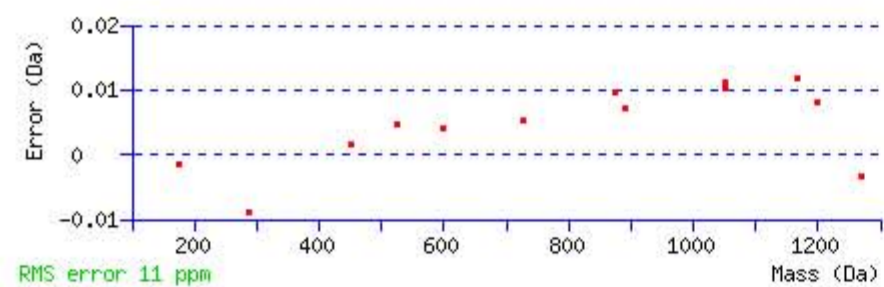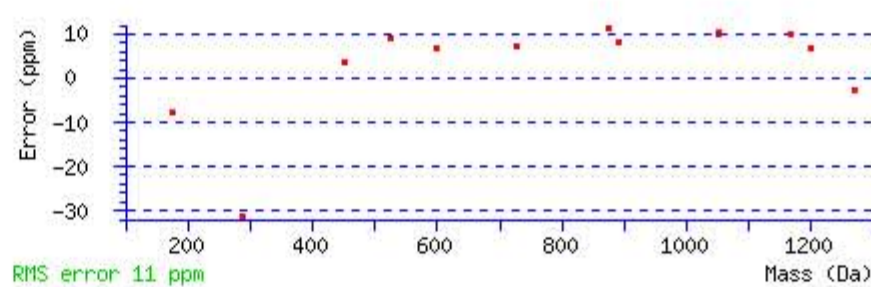

NCBI BLAST search of [AAFCYQIR](#)

(Parameters: blastp, nr protein database, expect=20000, no filter, PAM30)

Other BLAST [web gateways](#)

## All matches to this query

| Score | Mr(calc):   | Delta     | Sequence                     |
|-------|-------------|-----------|------------------------------|
| 27.8  | 1338.657669 | 0.012039  | <a href="#">AAFCYQIR</a>     |
| 2.1   | 1338.686661 | -0.016953 | <a href="#">QPQAWKDR</a>     |
| 1.2   | 1338.678802 | -0.009094 | <a href="#">ALAMGFQSMVIR</a> |

Mascot: <http://www.matrixscience.com/>

# MASCOT Search Results

## Peptide View

MS/MS Fragmentation of **SPLNDFQVLR**

Found in **HGFL\_HUMAN**, Hepatocyte growth factor-like protein OS=Homo sapiens GN=MST1 PE=1 SV=2

Match to Query 27082: 1498.806248 from(750.410400,2+) rtinseconds(2388) index(62663)

Title: Locus:1.1.1.1743.13 File:"2013-07-02 CLN FXIII 180 min 3rd FT.wiff"

Data file C:\Program Files (x86)\Matrix Science\Mascot Daemon\mgf\9 FXIII 180 min 3rd\mascot\_daemon\_merge.mgf

Click mouse within plot area to zoom in by factor of two about that point

Or, Plot from  to  Da

Label all possible matches  Label matches used for scoring

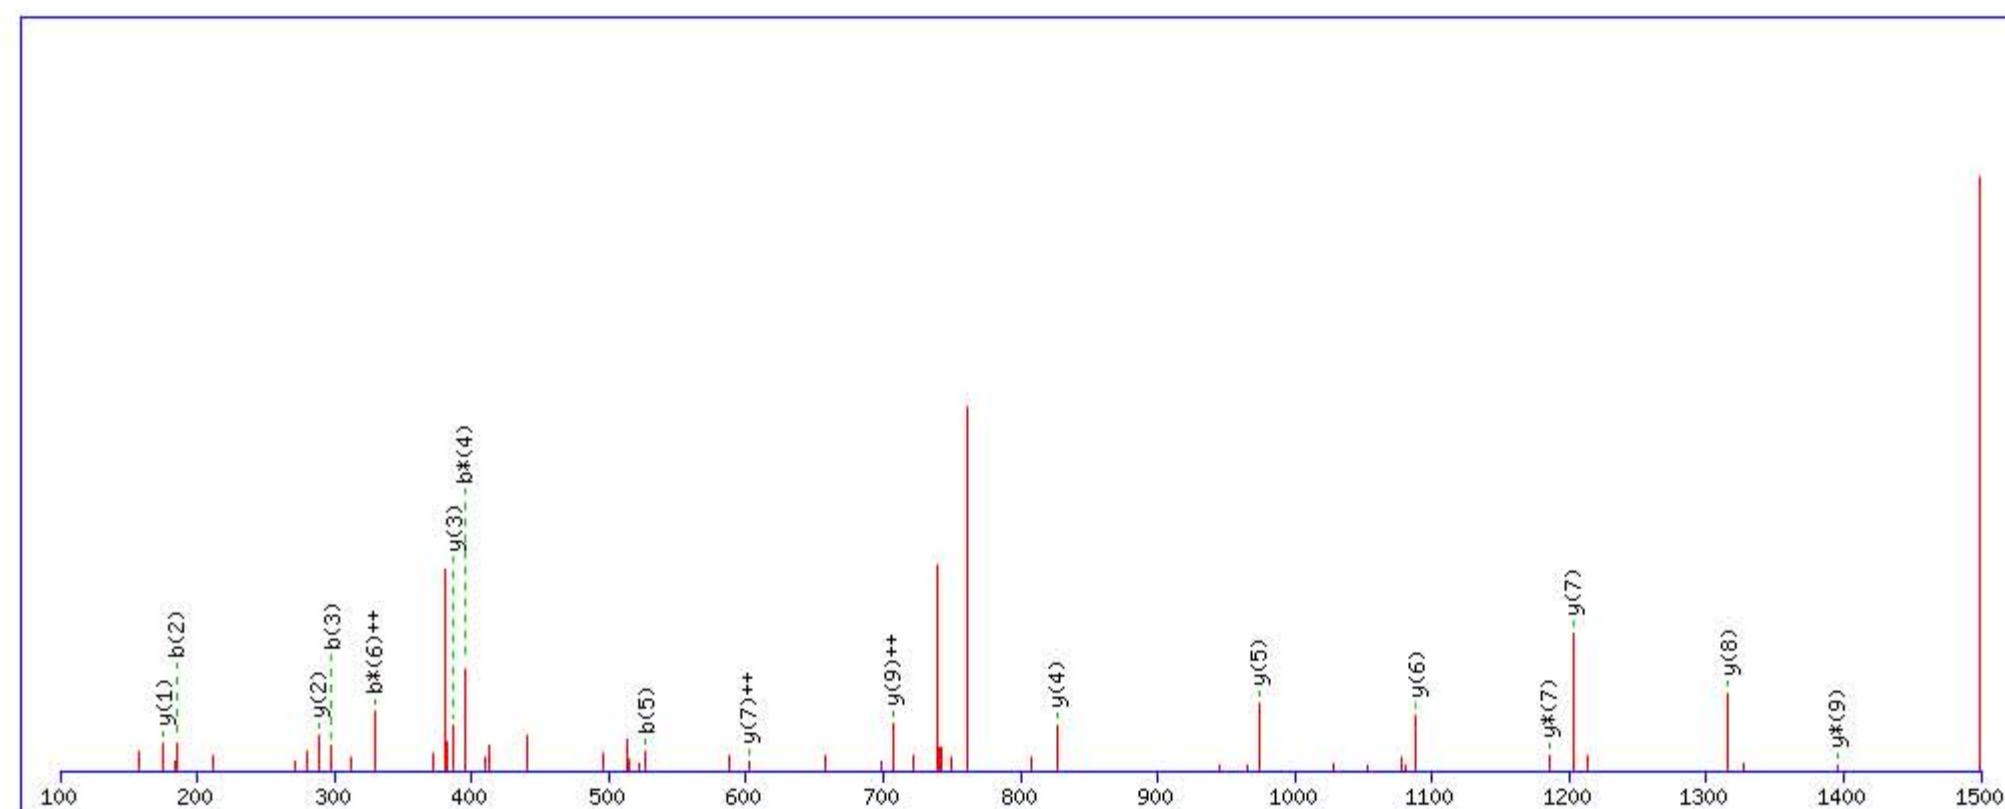

Monoisotopic mass of neutral peptide  $M_r(\text{calc})$ : 1498.796616

Fixed modifications: Carbamidomethyl (C) (apply to specified residues or termini only)

Variable modifications:

Q7 : Biotin:Thermo-21345 (Q)

Ions Score: 46 Expect: 0.00016

Matches : 17/92 fragment ions using 33 most intense peaks [\(help\)](#)

| #  | b                 | b <sup>++</sup> | b <sup>*</sup>    | b <sup>*++</sup>  | b <sup>0</sup> | b <sup>0++</sup> | Seq. | y                  | y <sup>++</sup>   | y <sup>*</sup>     | y <sup>*++</sup> | y <sup>0</sup> | y <sup>0++</sup> | #  |
|----|-------------------|-----------------|-------------------|-------------------|----------------|------------------|------|--------------------|-------------------|--------------------|------------------|----------------|------------------|----|
| 1  | 88.039304         | 44.523290       |                   |                   | 70.028739      | 35.518008        | S    |                    |                   |                    |                  |                |                  | 10 |
| 2  | <b>185.092068</b> | 93.049672       |                   |                   | 167.081503     | 84.044389        | P    | 1412.771868        | <b>706.889572</b> | <b>1395.745319</b> | 698.376298       | 1394.761303    | 697.884290       | 9  |
| 3  | <b>298.176132</b> | 149.591704      |                   |                   | 280.165567     | 140.586422       | L    | <b>1315.719104</b> | 658.363190        | 1298.692555        | 649.849916       | 1297.708539    | 649.357908       | 8  |
| 4  | 412.219059        | 206.613168      | <b>395.192510</b> | 198.099893        | 394.208494     | 197.607885       | N    | <b>1202.635040</b> | <b>601.821158</b> | <b>1185.608491</b> | 593.307884       | 1184.624475    | 592.815876       | 7  |
| 5  | <b>527.246002</b> | 264.126639      | 510.219453        | 255.613365        | 509.235437     | 255.121357       | D    | <b>1088.592113</b> | 544.799695        | 1071.565564        | 536.286420       | 1070.581548    | 535.794412       | 6  |
| 6  | 674.314416        | 337.660846      | 657.287867        | <b>329.147572</b> | 656.303851     | 328.655564       | F    | <b>973.565170</b>  | 487.286223        | 956.538621         | 478.772949       |                |                  | 5  |
| 7  | 1113.539742       | 557.273509      | 1096.513193       | 548.760235        | 1095.529177    | 548.268227       | Q    | <b>826.496756</b>  | 413.752016        | 809.470207         | 405.238742       |                |                  | 4  |
| 8  | 1212.608156       | 606.807716      | 1195.581607       | 598.294442        | 1194.597591    | 597.802434       | V    | <b>387.271430</b>  | 194.139353        | 370.244881         | 185.626078       |                |                  | 3  |
| 9  | 1325.692220       | 663.349748      | 1308.665671       | 654.836474        | 1307.681655    | 654.344466       | L    | <b>288.203016</b>  | 144.605146        | 271.176467         | 136.091871       |                |                  | 2  |
| 10 |                   |                 |                   |                   |                |                  | R    | <b>175.118952</b>  | 88.063114         | 158.092403         | 79.549839        |                |                  | 1  |

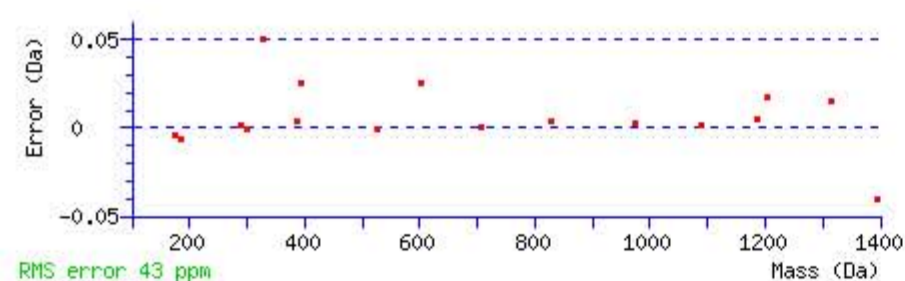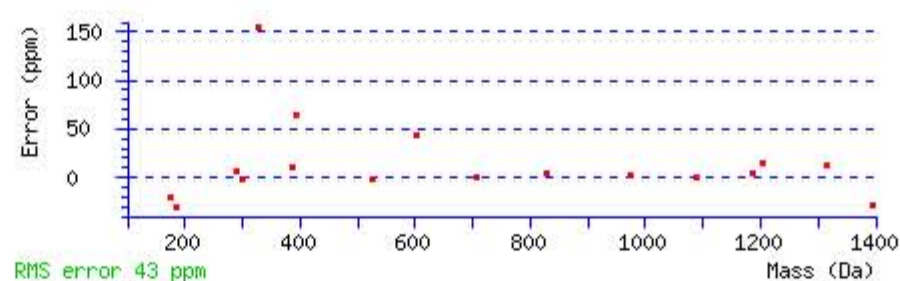

NCBI BLAST search of **SPLNDFQVLR**

(Parameters: blastp, nr protein database, expect=20000, no filter, PAM30)

Other BLAST [web gateways](#)

## All matches to this query

| Score | $M_r(\text{calc})$ : | Delta     | Sequence                        |
|-------|----------------------|-----------|---------------------------------|
| 46.5  | 1498.796616          | 0.009632  | <a href="#">SPLNDFQVLR</a>      |
| 5.7   | 1498.792572          | 0.013676  | <a href="#">ALNITSLQMHS LR</a>  |
| 2.6   | 1498.817749          | -0.011501 | <a href="#">LQGLPIVAGTMDIR</a>  |
| 1.4   | 1498.787888          | 0.018360  | <a href="#">ALSTTTSVDVSYKK</a>  |
| 1.3   | 1498.796585          | 0.009663  | <a href="#">LSLPTRAWEPAMK</a>   |
| 1.1   | 1498.807846          | -0.001598 | <a href="#">ISGERVPQFR</a>      |
| 0.8   | 1498.799103          | 0.007145  | <a href="#">ALLNLPGTQTSGEAK</a> |
| 0.4   | 1498.799973          | 0.006275  | <a href="#">ALLDQLMG TAR</a>    |

# MASCOT Search Results

## Peptide View

MS/MS Fragmentation of **QEATTVSCFR**

Found in **HGFL\_HUMAN**, Hepatocyte growth factor-like protein OS=Homo sapiens GN=MST1 PE=1 SV=2

Match to Query 27453: 1508.714808 from(755.364680,2+) rtinseconds(1766) index(59275)

Title: Locus:1.1.1.1526.19 File:"2013-07-02 CLN FXIII 180 min 3rd FT.wiff"

Data file C:\Program Files (x86)\Matrix Science\Mascot Daemon\mgf9 FXIII 180 min 3rd\mascot\_daemon\_merge.mgf

Click mouse within plot area to zoom in by factor of two about that point

Or, Plot from  to  Da

Label all possible matches  Label matches used for scoring

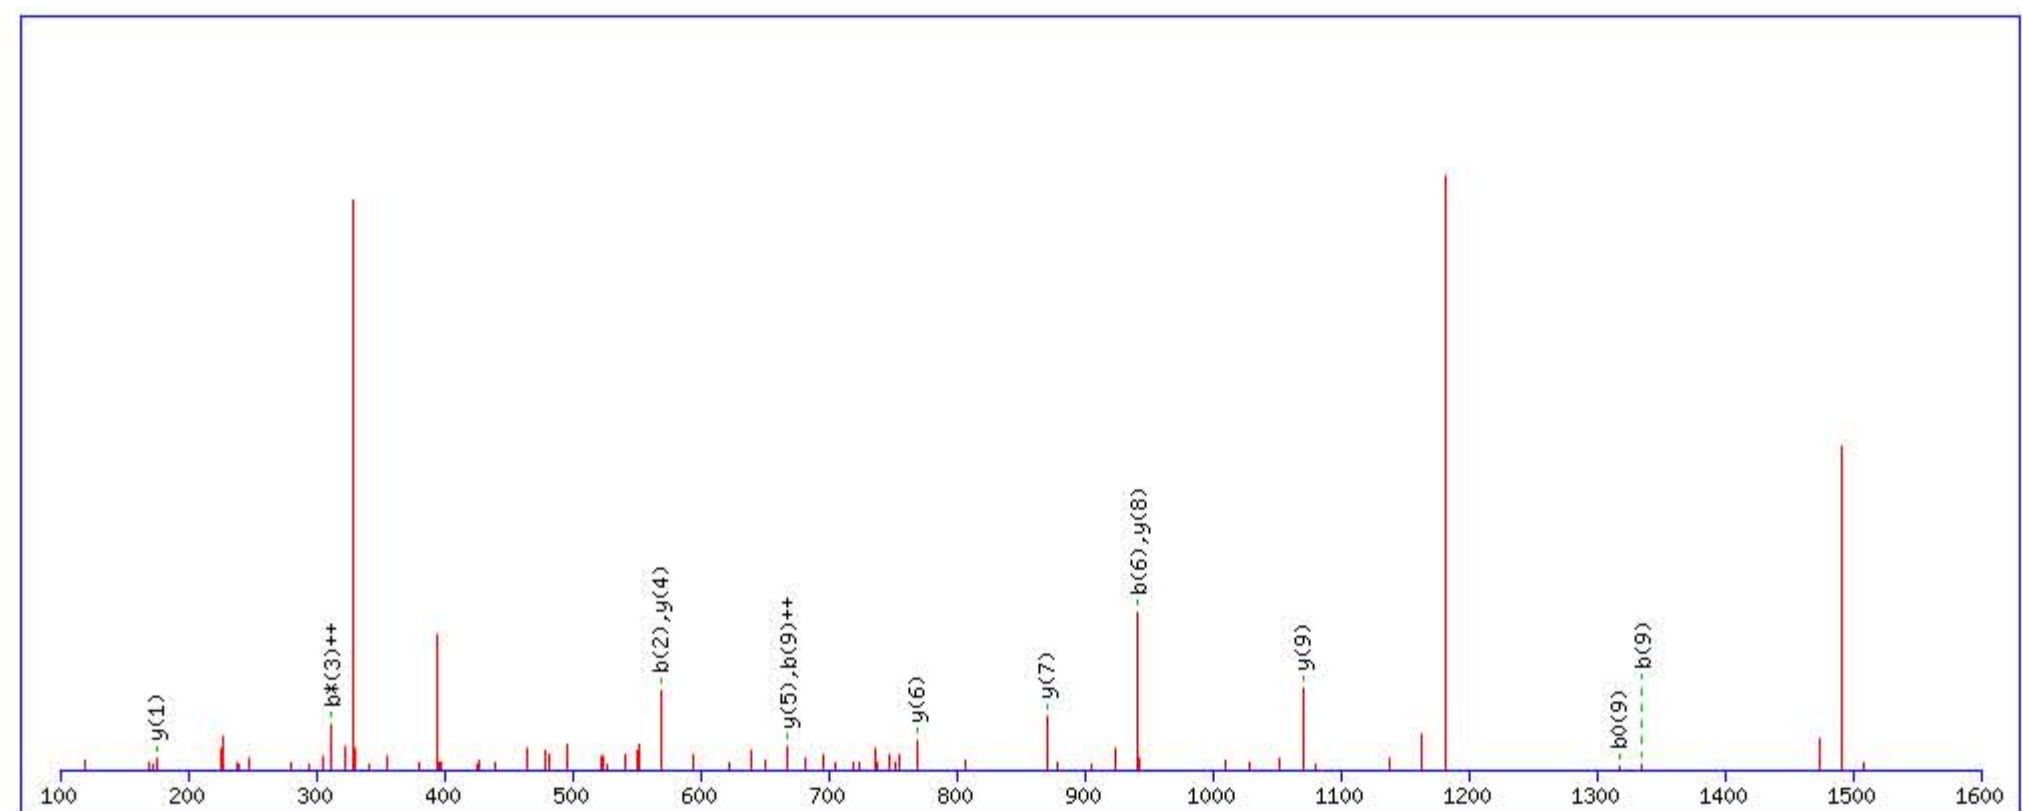

Monoisotopic mass of neutral peptide Mr(calc): 1508.711578

Fixed modifications: Carbamidomethyl (C) (apply to specified residues or termini only)

Variable modifications:

Q1 : Biotin:Thermo-21345 (Q)

Ions Score: 55 Expect: 5.4e-005

Matches : 13/100 fragment ions using 14 most intense peaks [\(help\)](#)

| #  | b                  | b <sup>++</sup>   | b <sup>+</sup> | b <sup>+++</sup>  | b <sup>0</sup>     | b <sup>0++</sup> | Seq. | y                  | y <sup>++</sup> | y <sup>+</sup> | y <sup>+++</sup> | y <sup>0</sup> | y <sup>0++</sup> | #  |
|----|--------------------|-------------------|----------------|-------------------|--------------------|------------------|------|--------------------|-----------------|----------------|------------------|----------------|------------------|----|
| 1  | 440.232602         | 220.619939        | 423.206053     | 212.106664        |                    |                  | Q    |                    |                 |                |                  |                |                  | 10 |
| 2  | <b>569.275195</b>  | 285.141236        | 552.248646     | 276.627961        | 551.264630         | 276.135953       | E    | <b>1070.493522</b> | 535.750399      | 1053.466973    | 527.237125       | 1052.482957    | 526.745117       | 9  |
| 3  | 640.312309         | 320.659793        | 623.285760     | <b>312.146518</b> | 622.301744         | 311.654510       | A    | <b>941.450929</b>  | 471.229103      | 924.424380     | 462.715828       | 923.440364     | 462.223820       | 8  |
| 4  | 741.359988         | 371.183632        | 724.333439     | 362.670358        | 723.349423         | 362.178350       | T    | <b>870.413815</b>  | 435.710546      | 853.387266     | 427.197271       | 852.403250     | 426.705263       | 7  |
| 5  | 842.407667         | 421.707472        | 825.381118     | 413.194197        | 824.397102         | 412.702189       | T    | <b>769.366136</b>  | 385.186706      | 752.339587     | 376.673432       | 751.355571     | 376.181424       | 6  |
| 6  | <b>941.476081</b>  | 471.241679        | 924.449532     | 462.728404        | 923.465516         | 462.236396       | V    | <b>668.318457</b>  | 334.662867      | 651.291908     | 326.149592       | 650.307892     | 325.657584       | 5  |
| 7  | 1028.508109        | 514.757693        | 1011.481560    | 506.244418        | 1010.497544        | 505.752410       | S    | <b>569.250043</b>  | 285.128660      | 552.223494     | 276.615385       | 551.239478     | 276.123377       | 4  |
| 8  | 1188.538758        | 594.773017        | 1171.512209    | 586.259743        | 1170.528193        | 585.767735       | C    | 482.218015         | 241.612646      | 465.191466     | 233.099371       |                |                  | 3  |
| 9  | <b>1335.607172</b> | <b>668.307224</b> | 1318.580623    | 659.793950        | <b>1317.596607</b> | 659.301942       | F    | 322.187366         | 161.597321      | 305.160817     | 153.084047       |                |                  | 2  |
| 10 |                    |                   |                |                   |                    |                  | R    | <b>175.118952</b>  | 88.063114       | 158.092403     | 79.549839        |                |                  | 1  |

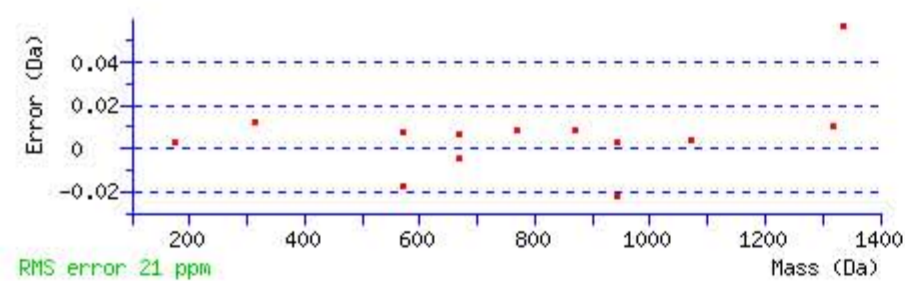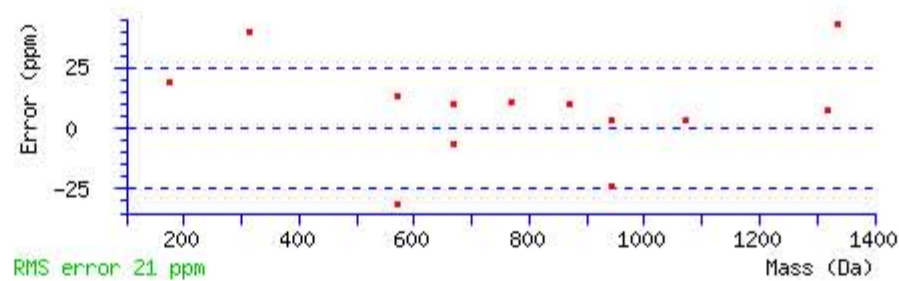

NCBI BLAST search of **QEATTVSCFR**

(Parameters: blastp, nr protein database, expect=20000, no filter, PAM30)

Other BLAST [web gateways](#)

## All matches to this query

| Score | Mr(calc):   | Delta     | Sequence                        |
|-------|-------------|-----------|---------------------------------|
| 55.0  | 1508.711578 | 0.003230  | <a href="#">QEATTVSCFR</a>      |
| 9.8   | 1508.726624 | -0.011816 | <a href="#">RDGQLQRMNYGR</a>    |
| 6.7   | 1508.711380 | 0.003428  | <a href="#">RTASGGRTAQMSR</a>   |
| 5.9   | 1508.708191 | 0.006617  | <a href="#">EYGSMTVHLGPR</a>    |
| 3.7   | 1508.733154 | -0.018346 | <a href="#">APGSRLSSGGTNYSR</a> |
| 2.9   | 1508.736710 | -0.021902 | <a href="#">LKSSQMEQFT</a>      |
| 2.0   | 1508.732681 | -0.017873 | <a href="#">KEAMKVSSQPCTK</a>   |
| 1.4   | 1508.711548 | 0.003260  | <a href="#">QMSKYPSGER</a>      |
| 1.4   | 1508.715408 | -0.000600 | <a href="#">DHKSVDECKVHR</a>    |
| 1.4   | 1508.701660 | 0.013148  | <a href="#">MGAAWQEPHR</a>      |

# MASCOT Search Results

## Peptide View

MS/MS Fragmentation of **NPDGSERPWCYTTDPQIER**

Found in **HGFL\_HUMAN**, Hepatocyte growth factor-like protein OS=Homo sapiens GN=MST1 PE=1 SV=2

Match to Query 49800: 2631.196632 from(878.072820,3+) rtinseconds(2034) index(60802)  
Title: Locus:1.1.1.1619.10 File:"2013-07-02 CLN FXIII 180 min 3rd FT.wiff"  
Data file C:\Program Files (x86)\Matrix Science\Mascot Daemon\mgf9 FXIII 180 min 3rd\mascot\_daemon\_merge.mgf

Click mouse within plot area to zoom in by factor of two about that point

Or, Plot from  to  Da

Label all possible matches  Label matches used for scoring

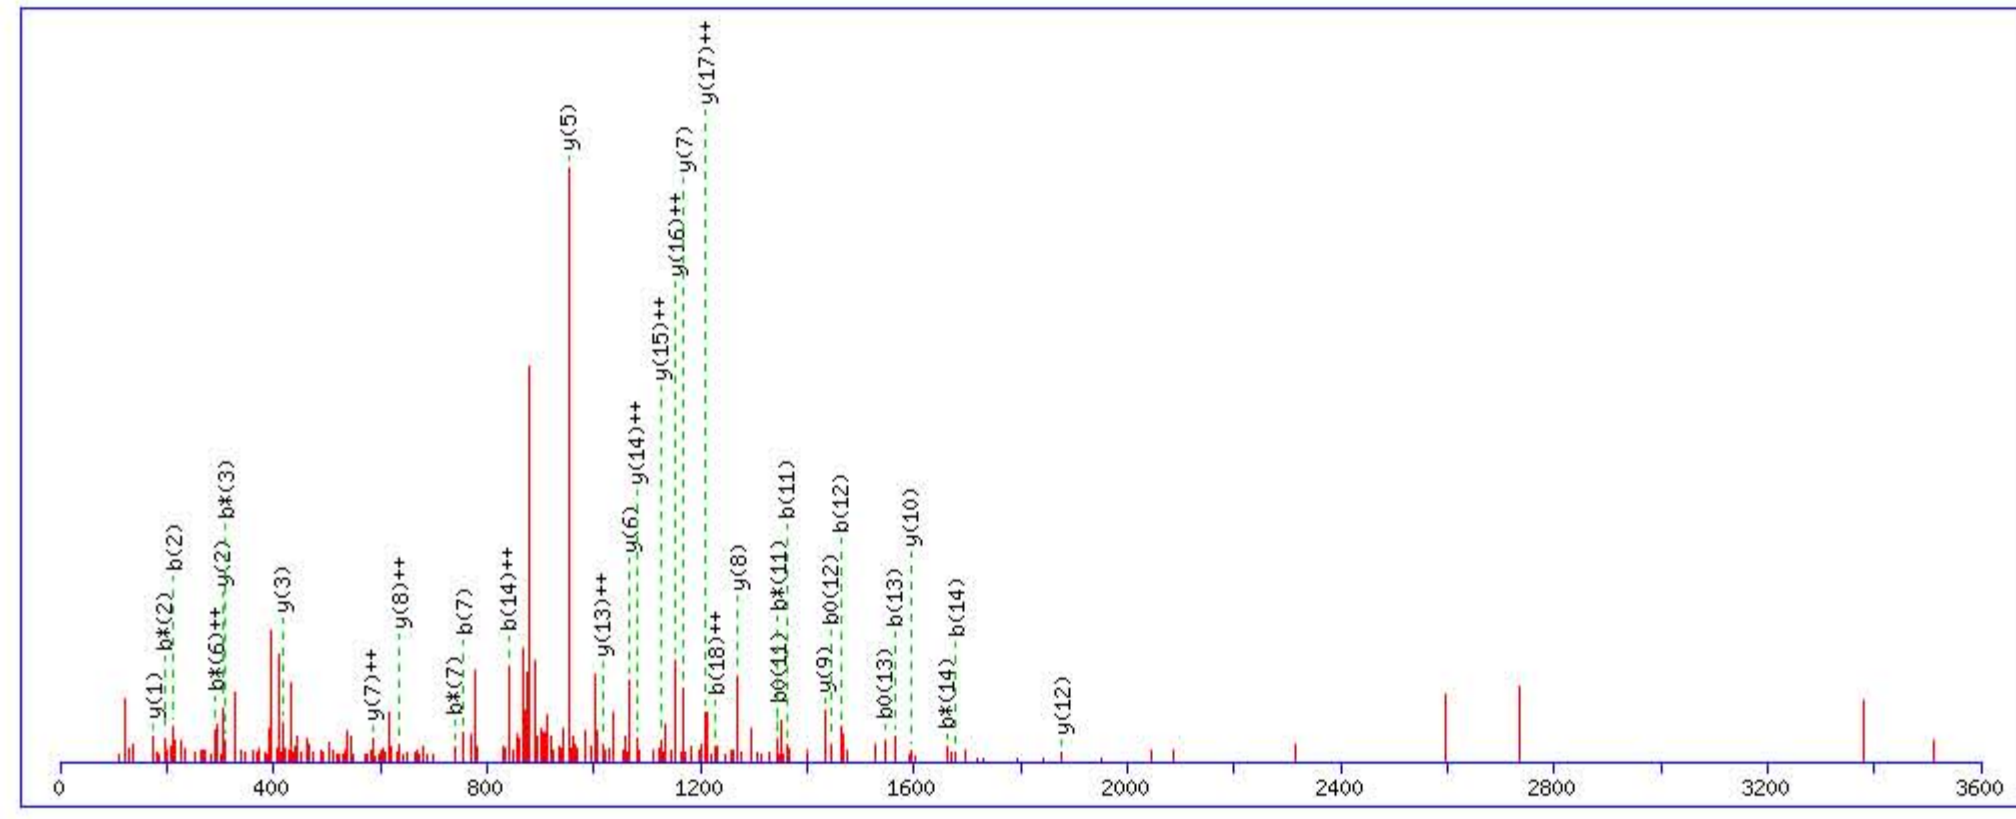

Monoisotopic mass of neutral peptide Mr(calc): 2631.184601  
Fixed modifications: Carbamidomethyl (C) (apply to specified residues or termini only)  
Variable modifications:  
Q16 : Biotin:Thermo-21345 (Q)  
Ions Score: 37 Expect: 0.0025  
Matches : 34/210 fragment ions using 90 most intense peaks [\(help\)](#)

| #  | b                  | b <sup>++</sup>    | b <sup>+</sup>     | b <sup>+++</sup>  | b <sup>0</sup>     | b <sup>0++</sup> | Seq. | y                  | y <sup>++</sup>    | y <sup>+</sup> | y <sup>+++</sup> | y <sup>0</sup> | y <sup>0++</sup> | #  |
|----|--------------------|--------------------|--------------------|-------------------|--------------------|------------------|------|--------------------|--------------------|----------------|------------------|----------------|------------------|----|
| 1  | 115.050203         | 58.028740          | 98.023654          | 49.515465         |                    |                  | N    |                    |                    |                |                  |                |                  | 19 |
| 2  | <b>212.102967</b>  | 106.555121         | <b>195.076418</b>  | 98.041847         |                    |                  | P    | 2518.148958        | 1259.578117        | 2501.122409    | 1251.064842      | 2500.138393    | 1250.572834      | 18 |
| 3  | 327.129910         | 164.068593         | <b>310.103361</b>  | 155.555319        | 309.119345         | 155.063311       | D    | 2421.096194        | <b>1211.051735</b> | 2404.069645    | 1202.538460      | 2403.085629    | 1202.046452      | 17 |
| 4  | 384.151374         | 192.579325         | 367.124825         | 184.066050        | 366.140809         | 183.574042       | G    | 2306.069251        | <b>1153.538263</b> | 2289.042702    | 1145.024989      | 2288.058686    | 1144.532981      | 16 |
| 5  | 471.183402         | 236.095339         | 454.156853         | 227.582064        | 453.172837         | 227.090056       | S    | 2249.047787        | <b>1125.027531</b> | 2232.021238    | 1116.514257      | 2231.037222    | 1116.022249      | 15 |
| 6  | 600.225995         | 300.616636         | 583.199446         | <b>292.103361</b> | 582.215430         | 291.611353       | E    | 2162.015759        | <b>1081.511517</b> | 2144.989210    | 1072.998243      | 2144.005194    | 1072.506235      | 14 |
| 7  | <b>756.327106</b>  | 378.667191         | <b>739.300557</b>  | 370.153916        | 738.316541         | 369.661908       | R    | 2032.973166        | <b>1016.990221</b> | 2015.946617    | 1008.476947      | 2014.962601    | 1007.984939      | 13 |
| 8  | 853.379870         | 427.193573         | 836.353321         | 418.680298        | 835.369305         | 418.188290       | P    | <b>1876.872055</b> | 938.939666         | 1859.845506    | 930.426391       | 1858.861490    | 929.934383       | 12 |
| 9  | 1039.459183        | 520.233229         | 1022.432634        | 511.719955        | 1021.448618        | 511.227947       | W    | 1779.819291        | 890.413284         | 1762.792742    | 881.900009       | 1761.808726    | 881.408001       | 11 |
| 10 | 1199.489832        | 600.248554         | 1182.463283        | 591.735280        | 1181.479267        | 591.243271       | C    | <b>1593.739978</b> | 797.373627         | 1576.713429    | 788.860353       | 1575.729413    | 788.368345       | 10 |
| 11 | <b>1362.553161</b> | 681.780219         | <b>1345.526612</b> | 673.266944        | <b>1344.542596</b> | 672.774936       | Y    | <b>1433.709329</b> | 717.358303         | 1416.682780    | 708.845028       | 1415.698764    | 708.353020       | 9  |
| 12 | <b>1463.600840</b> | 732.304058         | 1446.574291        | 723.790784        | <b>1445.590275</b> | 723.298776       | T    | <b>1270.646000</b> | <b>635.826638</b>  | 1253.619451    | 627.313364       | 1252.635435    | 626.821356       | 8  |
| 13 | <b>1564.648519</b> | 782.827898         | 1547.621970        | 774.314623        | <b>1546.637954</b> | 773.822615       | T    | <b>1169.598321</b> | <b>585.302799</b>  | 1152.571772    | 576.789524       | 1151.587756    | 576.297516       | 7  |
| 14 | <b>1679.675462</b> | <b>840.341369</b>  | <b>1662.648913</b> | 831.828095        | 1661.664897        | 831.336087       | D    | <b>1068.550642</b> | 534.778959         | 1051.524093    | 526.265685       | 1050.540077    | 525.773677       | 6  |
| 15 | 1776.728226        | 888.867751         | 1759.701677        | 880.354477        | 1758.717661        | 879.862469       | P    | <b>953.523699</b>  | 477.265488         | 936.497150     | 468.752213       | 935.513134     | 468.260205       | 5  |
| 16 | 2215.953552        | 1108.480414        | 2198.927003        | 1099.967139       | 2197.942987        | 1099.475131      | Q    | 856.470935         | 428.739106         | 839.444386     | 420.225831       | 838.460370     | 419.733823       | 4  |
| 17 | 2329.037616        | 1165.022446        | 2312.011067        | 1156.509171       | 2311.027051        | 1156.017163      | I    | <b>417.245609</b>  | 209.126443         | 400.219060     | 200.613168       | 399.235044     | 200.121160       | 3  |
| 18 | 2458.080209        | <b>1229.543743</b> | 2441.053660        | 1221.030468       | 2440.069644        | 1220.538460      | E    | <b>304.161545</b>  | 152.584411         | 287.134996     | 144.071136       | 286.150980     | 143.579128       | 2  |
| 19 |                    |                    |                    |                   |                    |                  | R    | <b>175.118952</b>  | 88.063114          | 158.092403     | 79.549839        |                |                  | 1  |

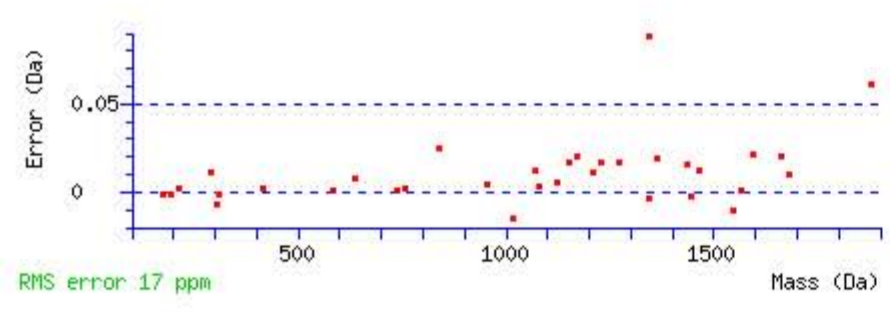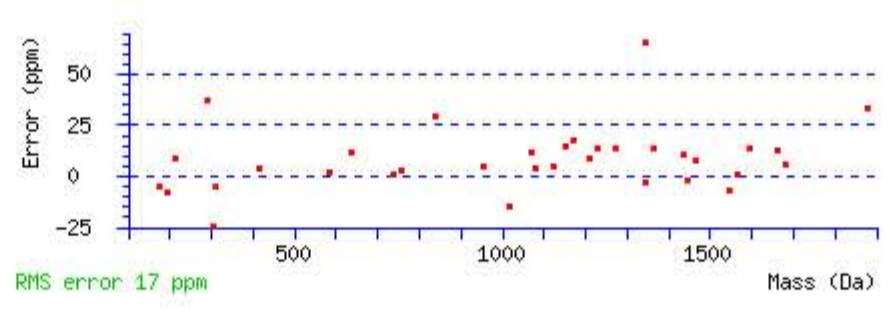

NCBI BLAST search of **NPDGSERPWCYTTDPQIER**  
(Parameters: blastp, nr protein database, expect=20000, no filter, PAM30)  
Other BLAST [web gateways](#)

### All matches to this query

| Score | Mr(calc):   | Delta    | Sequence                            |
|-------|-------------|----------|-------------------------------------|
| 36.7  | 2631.184601 | 0.012031 | <a href="#">NPDGSERPWCYTTDPQIER</a> |

**MASCOT SEARCH RESULTS**

Peptide View

MS/MS Fragmentation of **GTELQHLLHAVVPGPWQEDVADAEECAGR**  
 Found in **HGFL\_HUMAN**, Hepatocyte growth factor-like protein OS=Homo sapiens GN=MST1 PE=1 SV=2

Match to Query 59523: 3494.699376 from(874.682120,4+) rtinseconds(2830) index(65484)  
 Title: Locus:1.1.1.1895.16 File:"2013-07-02 CLN FXIII 180 min 3rd FT.wiff"  
 Data file C:\Program Files (x86)\Matrix Science\Mascot Daemon\mgf\9 FXIII 180 min 3rd\mascot\_daemon\_merge.mgf

Click mouse within plot area to zoom in by factor of two about that point  
 Or, Plot from 200 to 2600 Da Full range  
 Label all possible matches  Label matches used for scoring

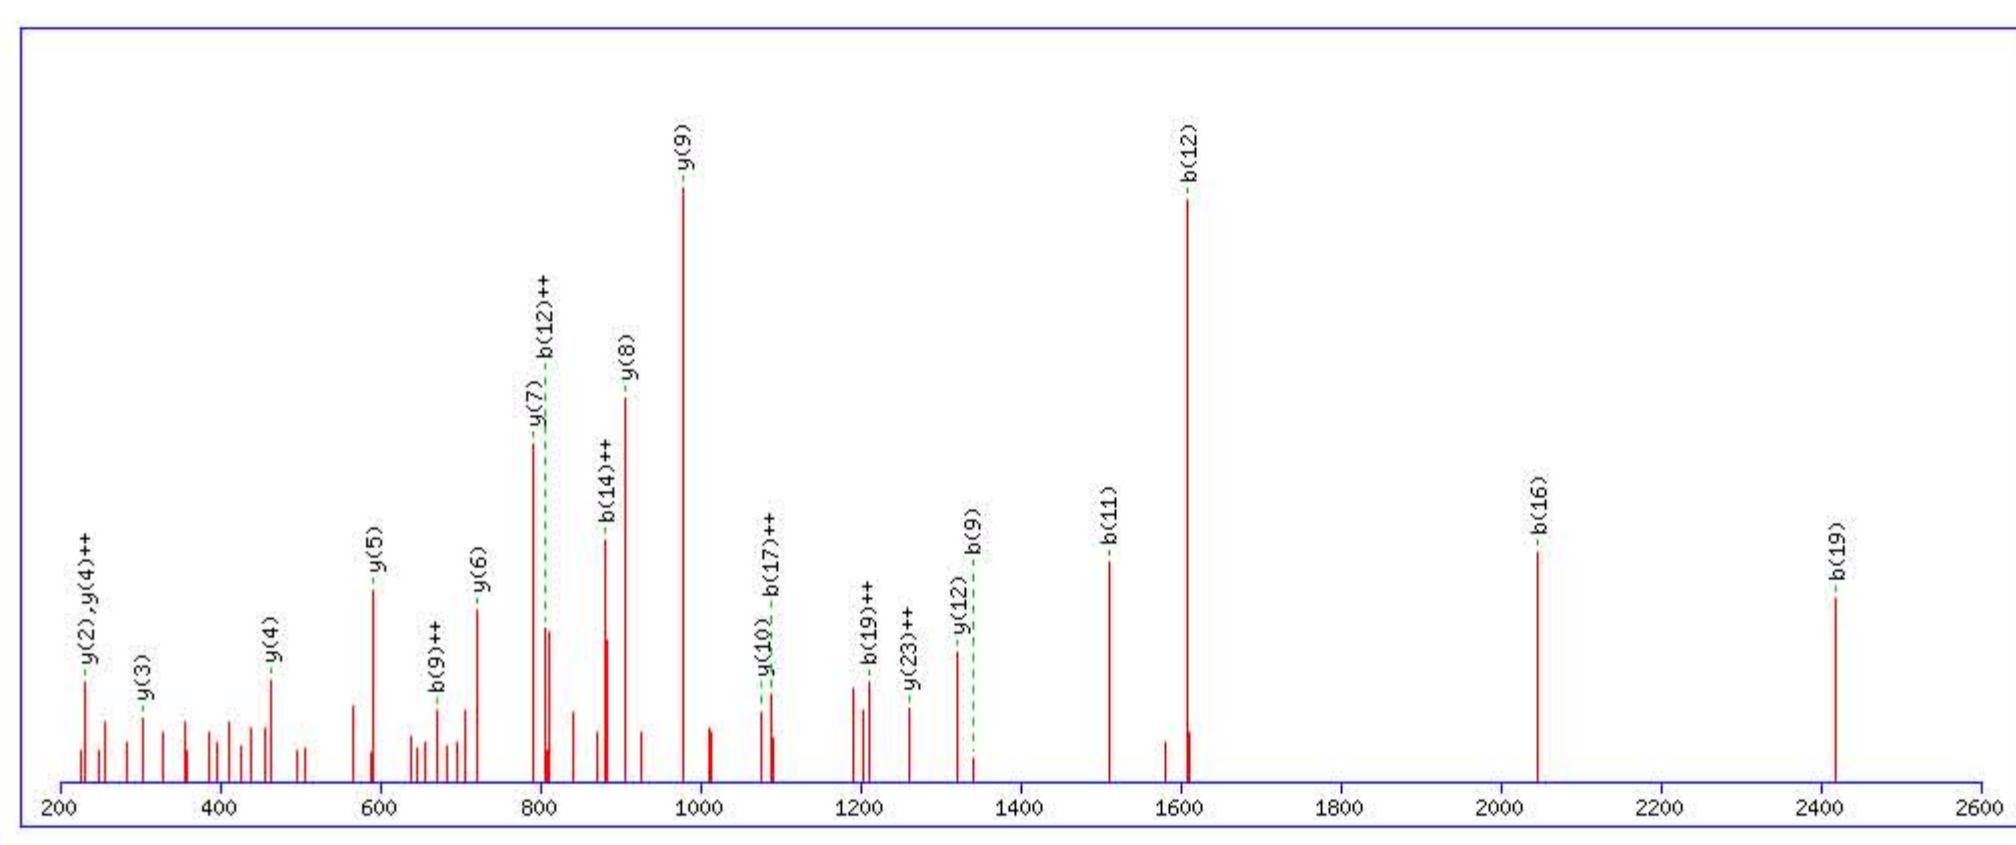

Monoisotopic mass of neutral peptide  $M_r(\text{calc})$ : 3494.671112  
 Fixed modifications: Carbamidomethyl (C) (apply to specified residues or termini only)  
 Variable modifications:  
 Q5 : Biotin:Thermo-21345 (Q)  
 Ions Score: 65 Expect: 7e-006  
 Matches : 22/318 fragment ions using 28 most intense peaks ([help](#))

| #  | b                  | b <sup>++</sup>    | b <sup>*</sup> | b <sup>*++</sup> | b <sup>0</sup> | b <sup>0++</sup> | Seq. | y                  | y <sup>++</sup>    | y <sup>*</sup> | y <sup>*++</sup> | y <sup>0</sup> | y <sup>0++</sup> | #  |
|----|--------------------|--------------------|----------------|------------------|----------------|------------------|------|--------------------|--------------------|----------------|------------------|----------------|------------------|----|
| 1  | 58.028740          | 29.518008          |                |                  |                |                  | G    |                    |                    |                |                  |                |                  | 29 |
| 2  | 159.076419         | 80.041847          |                |                  | 141.065854     | 71.036565        | T    | 3438.656925        | 1719.832100        | 3421.630376    | 1711.318826      | 3420.646360    | 1710.826818      | 28 |
| 3  | 288.119012         | 144.563144         |                |                  | 270.108447     | 135.557862       | E    | 3337.609246        | 1669.308261        | 3320.582697    | 1660.794986      | 3319.598681    | 1660.302978      | 27 |
| 4  | 401.203076         | 201.105176         |                |                  | 383.192511     | 192.099894       | L    | 3208.566653        | 1604.786964        | 3191.540104    | 1596.273690      | 3190.556088    | 1595.781682      | 26 |
| 5  | 840.428402         | 420.717839         | 823.401853     | 412.204565       | 822.417837     | 411.712557       | Q    | 3095.482589        | 1548.244932        | 3078.456040    | 1539.731658      | 3077.472024    | 1539.239650      | 25 |
| 6  | 977.487314         | 489.247295         | 960.460765     | 480.734021       | 959.476749     | 480.242013       | H    | 2656.257263        | 1328.632269        | 2639.230714    | 1320.118995      | 2638.246698    | 1319.626987      | 24 |
| 7  | 1090.571378        | 545.789327         | 1073.544829    | 537.276053       | 1072.560813    | 536.784045       | L    | 2519.198351        | <b>1260.102813</b> | 2502.171802    | 1251.589539      | 2501.187786    | 1251.097531      | 23 |
| 8  | 1203.655442        | 602.331359         | 1186.628893    | 593.818085       | 1185.644877    | 593.326077       | L    | 2406.114287        | 1203.560781        | 2389.087738    | 1195.047507      | 2388.103722    | 1194.555499      | 22 |
| 9  | <b>1340.714354</b> | <b>670.860815</b>  | 1323.687805    | 662.347541       | 1322.703789    | 661.855532       | H    | 2293.030223        | 1147.018749        | 2276.003674    | 1138.505475      | 2275.019658    | 1138.013467      | 21 |
| 10 | 1411.751468        | 706.379372         | 1394.724919    | 697.866098       | 1393.740903    | 697.374089       | A    | 2155.971311        | 1078.489293        | 2138.944762    | 1069.976019      | 2137.960746    | 1069.484011      | 20 |
| 11 | <b>1510.819882</b> | 755.913579         | 1493.793333    | 747.400305       | 1492.809317    | 746.908297       | V    | 2084.934197        | 1042.970736        | 2067.907648    | 1034.457462      | 2066.923632    | 1033.965454      | 19 |
| 12 | <b>1609.888296</b> | <b>805.447786</b>  | 1592.861747    | 796.934512       | 1591.877731    | 796.442504       | V    | 1985.865783        | 993.436530         | 1968.839234    | 984.923255       | 1967.855218    | 984.431247       | 18 |
| 13 | 1706.941060        | 853.974168         | 1689.914511    | 845.460894       | 1688.930495    | 844.968886       | P    | 1886.797369        | 943.902323         | 1869.770820    | 935.389048       | 1868.786804    | 934.897040       | 17 |
| 14 | 1763.962524        | <b>882.484900</b>  | 1746.935975    | 873.971626       | 1745.951959    | 873.479618       | G    | 1789.744605        | 895.375941         | 1772.718056    | 886.862666       | 1771.734040    | 886.370658       | 16 |
| 15 | 1861.015288        | 931.011282         | 1843.988739    | 922.498008       | 1843.004723    | 922.006000       | P    | 1732.723141        | 866.865209         | 1715.696592    | 858.351934       | 1714.712576    | 857.859926       | 15 |
| 16 | <b>2047.094601</b> | 1024.050939        | 2030.068052    | 1015.537664      | 2029.084036    | 1015.045656      | W    | 1635.670377        | 818.338827         | 1618.643828    | 809.825552       | 1617.659812    | 809.333544       | 14 |
| 17 | 2175.153179        | <b>1088.080227</b> | 2158.126630    | 1079.566953      | 2157.142614    | 1079.074945      | Q    | 1449.591064        | 725.299170         | 1432.564515    | 716.785896       | 1431.580499    | 716.293888       | 13 |
| 18 | 2304.195772        | 1152.601524        | 2287.169223    | 1144.088249      | 2286.185207    | 1143.596241      | E    | <b>1321.532486</b> | 661.269881         | 1304.505937    | 652.756607       | 1303.521921    | 652.264599       | 12 |
| 19 | <b>2419.222715</b> | <b>1210.114995</b> | 2402.196166    | 1201.601721      | 2401.212150    | 1201.109713      | D    | 1192.489893        | 596.748585         | 1175.463344    | 588.235310       | 1174.479328    | 587.743302       | 11 |
| 20 | 2518.291129        | 1259.649202        | 2501.264580    | 1251.135928      | 2500.280564    | 1250.643920      | V    | <b>1077.462950</b> | 539.235113         | 1060.436401    | 530.721839       | 1059.452385    | 530.229831       | 10 |
| 21 | 2589.328243        | 1295.167759        | 2572.301694    | 1286.654485      | 2571.317678    | 1286.162477      | A    | <b>978.394536</b>  | 489.700906         | 961.367987     | 481.187632       | 960.383971     | 480.695624       | 9  |
| 22 | 2704.355186        | 1352.681231        | 2687.328637    | 1344.167956      | 2686.344621    | 1343.675948      | D    | <b>907.357422</b>  | 454.182349         | 890.330873     | 445.669075       | 889.346857     | 445.177067       | 8  |
| 23 | 2775.392300        | 1388.199788        | 2758.365751    | 1379.686513      | 2757.381735    | 1379.194505      | A    | <b>792.330479</b>  | 396.668878         | 775.303930     | 388.155603       | 774.319914     | 387.663595       | 7  |
| 24 | 2904.434893        | 1452.721085        | 2887.408344    | 1444.207810      | 2886.424328    | 1443.715802      | E    | <b>721.293365</b>  | 361.150321         | 704.266816     | 352.637046       | 703.282800     | 352.145038       | 6  |
| 25 | 3033.477486        | 1517.242381        | 3016.450937    | 1508.729106      | 3015.466921    | 1508.237099      | E    | <b>592.250772</b>  | 296.629024         | 575.224223     | 288.115750       | 574.240207     | 287.623742       | 5  |
| 26 | 3193.508135        | 1597.257705        | 3176.481586    | 1588.744431      | 3175.497570    | 1588.252423      | C    | <b>463.208179</b>  | <b>232.107727</b>  | 446.181630     | 223.594453       |                |                  | 4  |
| 27 | 3264.545249        | 1632.776263        | 3247.518700    | 1624.262988      | 3246.534684    | 1623.770980      | A    | <b>303.177530</b>  | 152.092403         | 286.150981     | 143.579129       |                |                  | 3  |
| 28 | 3321.566713        | 1661.286995        | 3304.540164    | 1652.773720      | 3303.556148    | 1652.281712      | G    | <b>232.140416</b>  | 116.573846         | 215.113867     | 108.060571       |                |                  | 2  |
| 29 |                    |                    |                |                  |                |                  | R    | 175.118952         | 88.063114          | 158.092403     | 79.549839        |                |                  | 1  |

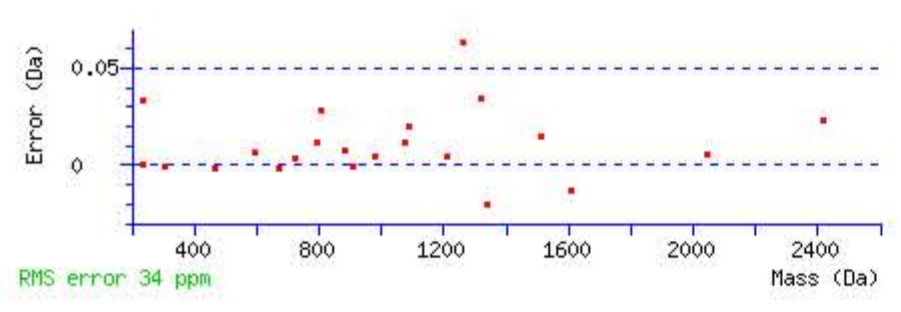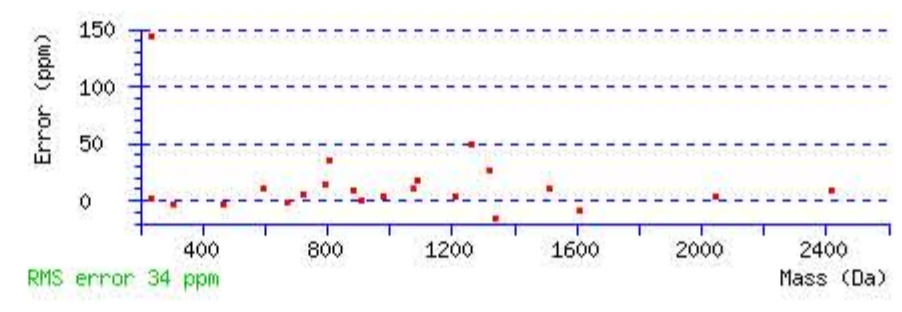

NCBI BLAST search of [GTELQHLLHAVVPGPWQEDVADAEECAGR](#)  
 (Parameters: blastp, nr protein database, expect=20000, no filter, PAM30)  
 Other BLAST [web gateways](#)

All matches to this query

| Score | Mr(calc):   | Delta    | Sequence                                      |
|-------|-------------|----------|-----------------------------------------------|
| 65.3  | 3494.671112 | 0.028264 | <a href="#">GTELQHLLHAVVPGPWQEDVADAEECAGR</a> |
| 42.5  | 3494.671112 | 0.028264 | <a href="#">GTELQHLLHAVVPGPWQEDVADAEECAGR</a> |



**MASCOT** Mascot Search Results

Peptide View

MS/MS Fragmentation of **WSAETPHKQQTFTSEPHAQLEENFCR**  
 Found in **HGFL\_HUMAN**, Hepatocyte growth factor-like protein OS=Homo sapiens GN=MST1 PE=1 SV=2

Match to Query 60354: 3584.680296 from(897.177350,4+) rtinseconds(2048) index(60855)  
 Title: Locus:1.1.1.1624.11 File:"2013-07-02 CLN FXIII 180 min 3rd FT.wiff"  
 Data file C:\Program Files (x86)\Matrix Science\Mascot Daemon\mgf9 FXIII 180 min 3rd\mascot\_daemon\_merge.mgf

Click mouse within plot area to zoom in by factor of two about that point  
 Or, Plot from [0] to [3400] Da Full range  
 Label all possible matches  Label matches used for scoring

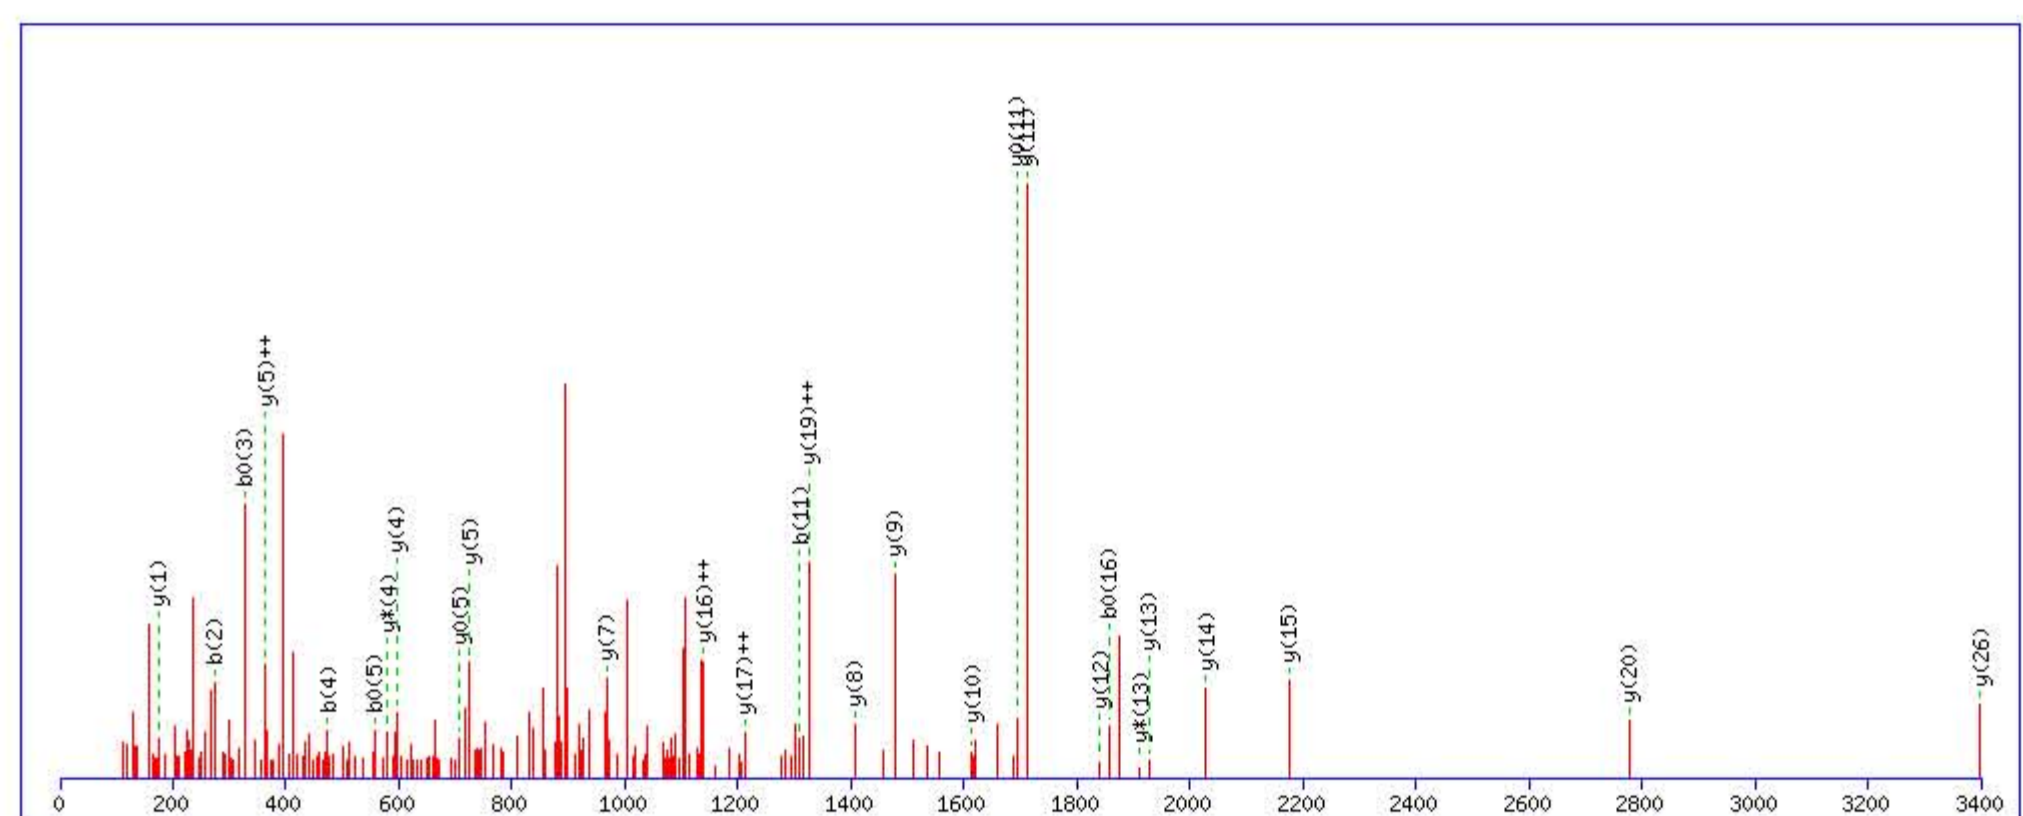

Monoisotopic mass of neutral peptide  $M_r(\text{calc})$ : 3584.660538  
 Fixed modifications: Carbamidomethyl (C) (apply to specified residues or termini only)  
 Variable modifications:  
 Q20 : Biotin:Thermo-21345 (Q)  
 Ions Score: 46 Expect: 0.00042  
 Matches : 28/288 fragment ions using 75 most intense peaks ([help](#))

| #  | b                  | b <sup>++</sup> | b <sup>*</sup> | b <sup>+++</sup> | b <sup>0</sup>     | b <sup>0++</sup> | Seq. | y                  | y <sup>++</sup>    | y <sup>*</sup>     | y <sup>+++</sup> | y <sup>0</sup>     | y <sup>0++</sup> | #  |
|----|--------------------|-----------------|----------------|------------------|--------------------|------------------|------|--------------------|--------------------|--------------------|------------------|--------------------|------------------|----|
| 1  | 187.086589         | 94.046932       |                |                  |                    |                  | W    |                    |                    |                    |                  |                    |                  | 27 |
| 2  | <b>274.118617</b>  | 137.562947      |                |                  | 256.108052         | 128.557664       | S    | <b>3399.588510</b> | 1700.297893        | 3382.561961        | 1691.784618      | 3381.577945        | 1691.292610      | 26 |
| 3  | 345.155731         | 173.081504      |                |                  | <b>327.145166</b>  | 164.076221       | A    | 3312.556482        | 1656.781879        | 3295.529933        | 1648.268605      | 3294.545917        | 1647.776597      | 25 |
| 4  | <b>474.198324</b>  | 237.602800      |                |                  | 456.187759         | 228.597518       | E    | 3241.519368        | 1621.263322        | 3224.492819        | 1612.750047      | 3223.508803        | 1612.258040      | 24 |
| 5  | 575.246003         | 288.126640      |                |                  | <b>557.235438</b>  | 279.121357       | T    | 3112.476775        | 1556.742026        | 3095.450226        | 1548.228751      | 3094.466210        | 1547.736743      | 23 |
| 6  | 672.298767         | 336.653022      |                |                  | 654.288202         | 327.647739       | P    | 3011.429096        | 1506.218186        | 2994.402547        | 1497.704912      | 2993.418531        | 1497.212904      | 22 |
| 7  | 809.357679         | 405.182478      |                |                  | 791.347114         | 396.177195       | H    | 2914.376332        | 1457.691804        | 2897.349783        | 1449.178530      | 2896.365767        | 1448.686522      | 21 |
| 8  | 937.452642         | 469.229959      | 920.426093     | 460.716685       | 919.442077         | 460.224677       | K    | <b>2777.317420</b> | 1389.162348        | 2760.290871        | 1380.649074      | 2759.306855        | 1380.157066      | 20 |
| 9  | 1034.505406        | 517.756341      | 1017.478857    | 509.243067       | 1016.494841        | 508.751059       | P    | 2649.222457        | <b>1325.114867</b> | 2632.195908        | 1316.601592      | 2631.211892        | 1316.109584      | 19 |
| 10 | 1162.563984        | 581.785630      | 1145.537435    | 573.272356       | 1144.553419        | 572.780348       | Q    | 2552.169693        | 1276.588485        | 2535.143144        | 1268.075210      | 2534.159128        | 1267.583202      | 18 |
| 11 | <b>1309.632398</b> | 655.319837      | 1292.605849    | 646.806563       | 1291.621833        | 646.314555       | F    | 2424.111115        | <b>1212.559196</b> | 2407.084566        | 1204.045921      | 2406.100550        | 1203.553913      | 17 |
| 12 | 1410.680077        | 705.843677      | 1393.653528    | 697.330402       | 1392.669512        | 696.838394       | T    | 2277.042701        | <b>1139.024988</b> | 2260.016152        | 1130.511714      | 2259.032136        | 1130.019706      | 16 |
| 13 | 1557.748491        | 779.377884      | 1540.721942    | 770.864609       | 1539.737926        | 770.372601       | F    | <b>2175.995022</b> | 1088.501149        | 2158.968473        | 1079.987874      | 2157.984457        | 1079.495866      | 15 |
| 14 | 1658.796170        | 829.901723      | 1641.769621    | 821.388449       | 1640.785605        | 820.896441       | T    | <b>2028.926608</b> | 1014.966942        | 2011.900059        | 1006.453668      | 2010.916043        | 1005.961660      | 14 |
| 15 | 1745.828198        | 873.417737      | 1728.801649    | 864.904463       | 1727.817633        | 864.412455       | S    | <b>1927.878929</b> | 964.443103         | <b>1910.852380</b> | 955.929828       | 1909.868364        | 955.437820       | 13 |
| 16 | 1874.870791        | 937.939034      | 1857.844242    | 929.425759       | <b>1856.860226</b> | 928.933751       | E    | <b>1840.846901</b> | 920.927089         | 1823.820352        | 912.413814       | 1822.836336        | 911.921806       | 12 |
| 17 | 1971.923555        | 986.465416      | 1954.897006    | 977.952141       | 1953.912990        | 977.460133       | P    | <b>1711.804308</b> | 856.405792         | 1694.777759        | 847.892518       | <b>1693.793743</b> | 847.400510       | 11 |
| 18 | 2108.982467        | 1054.994872     | 2091.955918    | 1046.481597      | 2090.971902        | 1045.989589      | H    | <b>1614.751544</b> | 807.879410         | 1597.724995        | 799.366136       | 1596.740979        | 798.874128       | 10 |
| 19 | 2180.019581        | 1090.513429     | 2162.993032    | 1082.000154      | 2162.009016        | 1081.508146      | A    | <b>1477.692632</b> | 739.349954         | 1460.666083        | 730.836680       | 1459.682067        | 730.344672       | 9  |
| 20 | 2619.244907        | 1310.126092     | 2602.218358    | 1301.612817      | 2601.234342        | 1301.120809      | Q    | <b>1406.655518</b> | 703.831397         | 1389.628969        | 695.318123       | 1388.644953        | 694.826115       | 8  |
| 21 | 2732.328971        | 1366.668124     | 2715.302422    | 1358.154849      | 2714.318406        | 1357.662841      | L    | <b>967.430192</b>  | 484.218734         | 950.403643         | 475.705460       | 949.419627         | 475.213452       | 7  |
| 22 | 2861.371564        | 1431.189420     | 2844.345015    | 1422.676146      | 2843.360999        | 1422.184138      | E    | 854.346128         | 427.676702         | 837.319579         | 419.163427       | 836.335563         | 418.671419       | 6  |
| 23 | 2990.414157        | 1495.710717     | 2973.387608    | 1487.197442      | 2972.403592        | 1486.705434      | E    | <b>725.303535</b>  | <b>363.155405</b>  | 708.276986         | 354.642131       | <b>707.292970</b>  | 354.150123       | 5  |
| 24 | 3104.457084        | 1552.732180     | 3087.430535    | 1544.218906      | 3086.446519        | 1543.726898      | N    | <b>596.260942</b>  | 298.634109         | <b>579.234393</b>  | 290.120834       |                    |                  | 4  |
| 25 | 3251.525498        | 1626.266387     | 3234.498949    | 1617.753113      | 3233.514933        | 1617.261105      | F    | 482.218015         | 241.612645         | 465.191466         | 233.099371       |                    |                  | 3  |
| 26 | 3411.556147        | 1706.281712     | 3394.529598    | 1697.768437      | 3393.545582        | 1697.276429      | C    | 335.149601         | 168.078438         | 318.123052         | 159.565164       |                    |                  | 2  |
| 27 |                    |                 |                |                  |                    |                  | R    | <b>175.118952</b>  | 88.063114          | 158.092403         | 79.549839        |                    |                  | 1  |

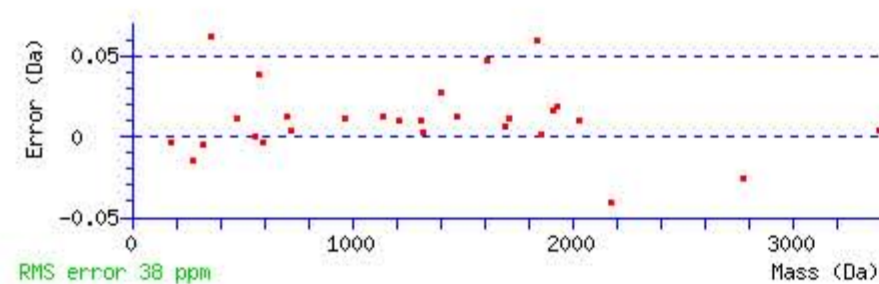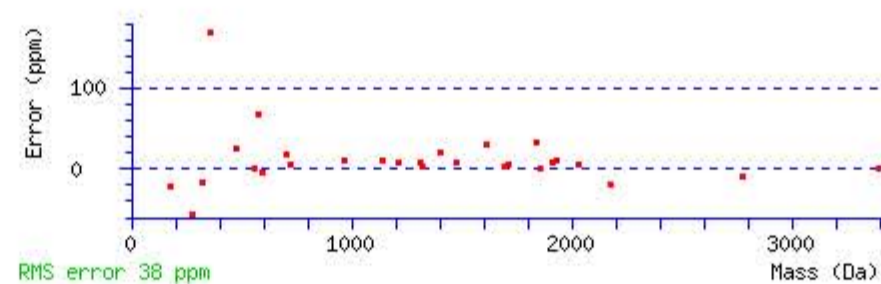

NCBI BLAST search of **WSAETPHKQQTFTSEPHAQLEENFCR**  
 (Parameters: blastp, nr protein database, expect=20000, no filter, PAM30)  
 Other BLAST [web gateways](#)

All matches to this query

| Score | $M_r(\text{calc})$ : | Delta    | Sequence                                   |
|-------|----------------------|----------|--------------------------------------------|
| 45.9  | 3584.660538          | 0.019758 | <a href="#">WSAETPHKQQTFTSEPHAQLEENFCR</a> |

# MASCOT Search Results

## Peptide View

MS/MS Fragmentation of **VVLGDQDLK**

Found in **HABP2\_HUMAN**, Hyaluronan-binding protein 2 OS=Homo sapiens GN=HABP2 PE=1 SV=1

Match to Query 20283: 1296.711088 from(649.362820,2+) rtinseconds(1992) index(46005)

Title: Locus:1.1.1.3406.16 File:"2013-07-02 CLN FXIII 180 min 3rd F 4.wiff"

Data file C:\Program Files (x86)\Matrix Science\Mascot Daemon\mgf\9 FXIII 180 min 3rd\mascot\_daemon\_merge.mgf

Click mouse within plot area to zoom in by factor of two about that point

Or, Plot from  to  Da

Label all possible matches  Label matches used for scoring

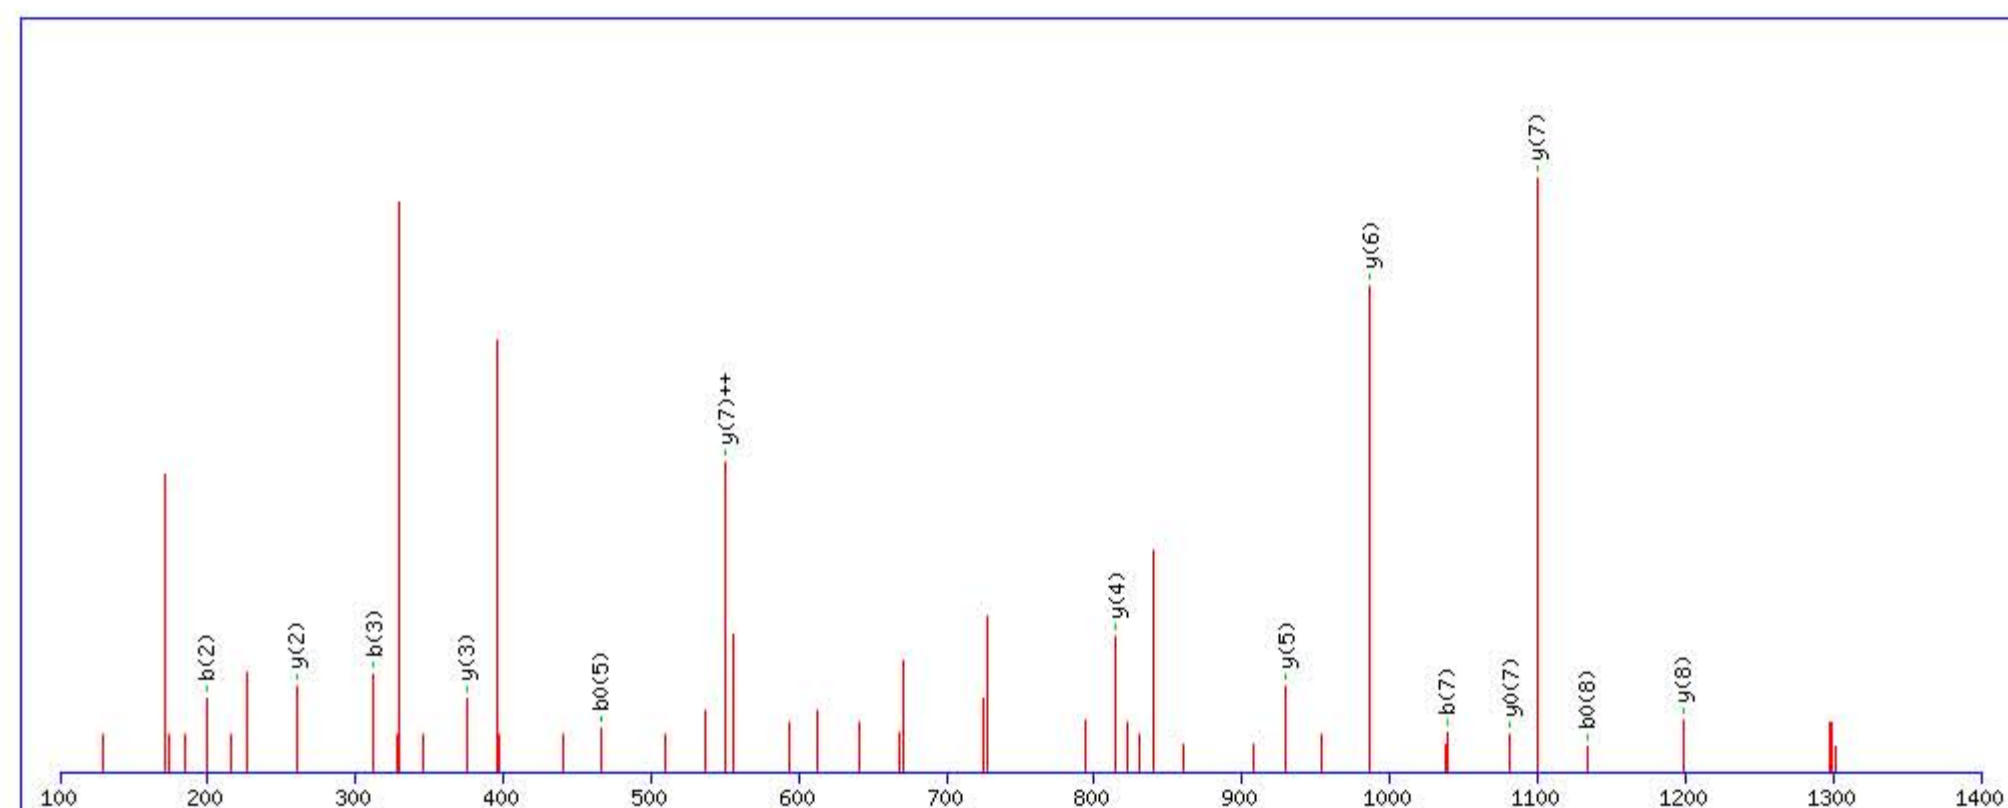

Monoisotopic mass of neutral peptide Mr(calc): 1296.711166

Fixed modifications: Carbamidomethyl (C) (apply to specified residues or termini only)

Variable modifications:

Q6 : Biotin:Thermo-21345 (Q)

Ions Score: 33 Expect: 0.00092

Matches : 14/74 fragment ions using 32 most intense peaks [\(help\)](#)

| # | b                  | b <sup>++</sup> | b <sup>*</sup> | b <sup>*++</sup> | b <sup>0</sup>     | b <sup>0++</sup> | Seq. | y                  | y <sup>++</sup>   | y <sup>*</sup> | y <sup>*++</sup> | y <sup>0</sup>     | y <sup>0++</sup> | # |
|---|--------------------|-----------------|----------------|------------------|--------------------|------------------|------|--------------------|-------------------|----------------|------------------|--------------------|------------------|---|
| 1 | 100.075690         | 50.541483       |                |                  |                    |                  | V    |                    |                   |                |                  |                    |                  | 9 |
| 2 | <b>199.144104</b>  | 100.075690      |                |                  |                    |                  | V    | <b>1198.650022</b> | 599.828649        | 1181.623473    | 591.315374       | 1180.639457        | 590.823366       | 8 |
| 3 | <b>312.228168</b>  | 156.617722      |                |                  |                    |                  | L    | <b>1099.581608</b> | <b>550.294442</b> | 1082.555059    | 541.781168       | <b>1081.571043</b> | 541.289159       | 7 |
| 4 | 369.249632         | 185.128454      |                |                  |                    |                  | G    | <b>986.497544</b>  | 493.752410        | 969.470995     | 485.239135       | 968.486979         | 484.747127       | 6 |
| 5 | 484.276575         | 242.641925      |                |                  | <b>466.266010</b>  | 233.636643       | D    | <b>929.476080</b>  | 465.241678        | 912.449531     | 456.728403       | 911.465515         | 456.236395       | 5 |
| 6 | 923.501901         | 462.254589      | 906.475352     | 453.741314       | 905.491336         | 453.249306       | Q    | <b>814.449137</b>  | 407.728206        | 797.422588     | 399.214932       | 796.438572         | 398.722924       | 4 |
| 7 | <b>1038.528844</b> | 519.768060      | 1021.502295    | 511.254785       | 1020.518279        | 510.762777       | D    | <b>375.223811</b>  | 188.115543        | 358.197262     | 179.602269       | 357.213246         | 179.110261       | 3 |
| 8 | 1151.612908        | 576.310092      | 1134.586359    | 567.796817       | <b>1133.602343</b> | 567.304809       | L    | <b>260.196868</b>  | 130.602072        | 243.170319     | 122.088797       |                    |                  | 2 |
| 9 |                    |                 |                |                  |                    |                  | K    | 147.112804         | 74.060040         | 130.086255     | 65.546765        |                    |                  | 1 |

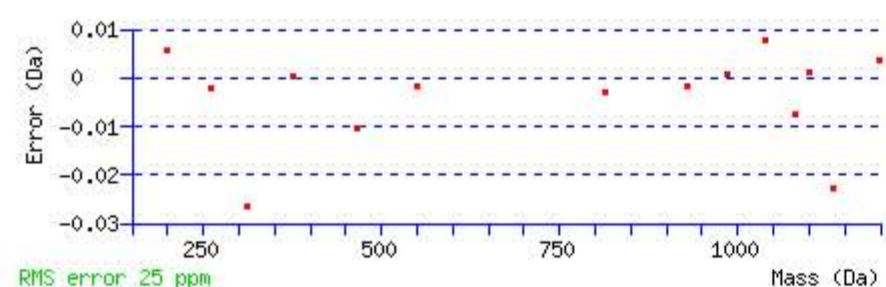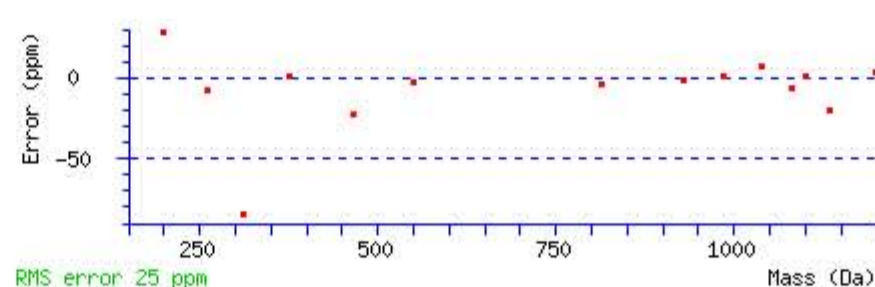

NCBI BLAST search of **VVLGDQDLK**

(Parameters: blastp, nr protein database, expect=20000, no filter, PAM30)

Other BLAST [web gateways](#)

All matches to this query

| Score | Mr(calc):   | Delta     | Sequence                     |
|-------|-------------|-----------|------------------------------|
| 33.5  | 1296.711166 | -0.000078 | <a href="#">VVLGDQDLK</a>    |
| 1.0   | 1296.692520 | 0.018568  | <a href="#">EVDATNLPPTLK</a> |
| 0.1   | 1296.719025 | -0.007937 | <a href="#">VVSIHQDPKFK</a>  |

Mascot: <http://www.matrixscience.com/>

# MASCOT Search Results

## Peptide View

MS/MS Fragmentation of **FTCACPDQFK**

Found in **HABP2\_HUMAN**, Hyaluronan-binding protein 2 OS=Homo sapiens GN=HABP2 PE=1 SV=1

Match to Query 29876: 1583.693808 from(792.854180,2+) rtinseconds(1891) index(45236)

Title: Locus:1.1.1.3371.14 File:"2013-07-02 CLN FXIII 180 min 3rd F 4.wiff"

Data file C:\Program Files (x86)\Matrix Science\Mascot Daemon\mgf\9 FXIII 180 min 3rd\mascot\_daemon\_merge.mgf

Click mouse within plot area to zoom in by factor of two about that point

Or, Plot from  to  Da

Label all possible matches  Label matches used for scoring

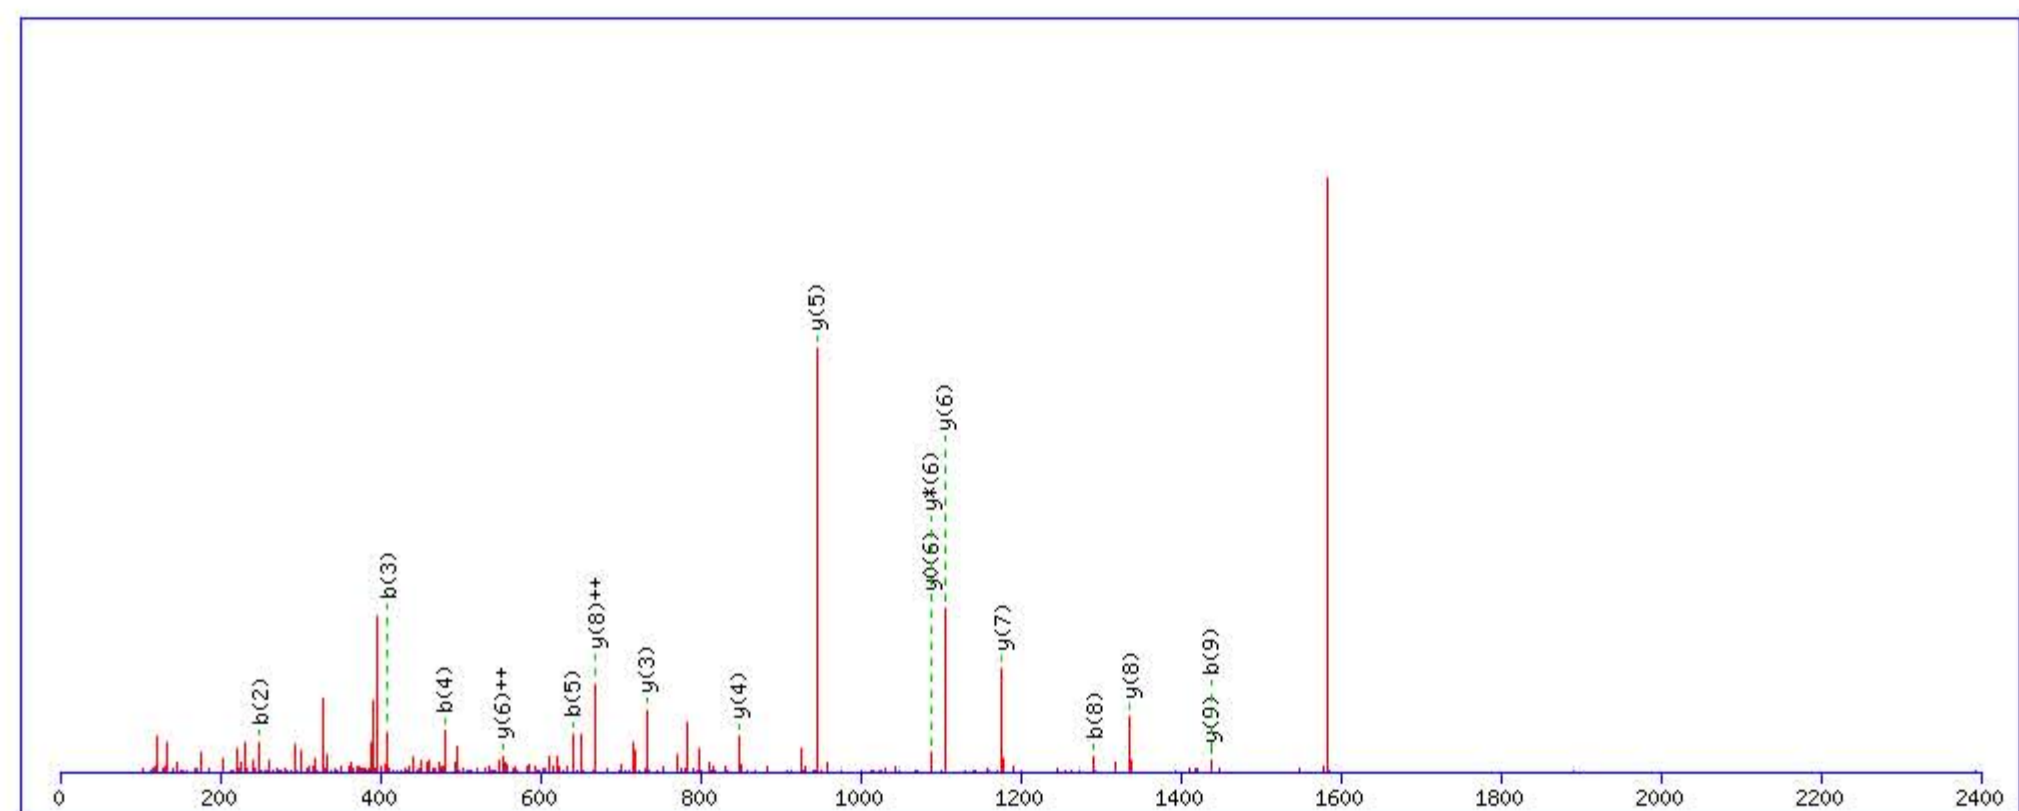

Monoisotopic mass of neutral peptide  $M_r(\text{calc})$ : 1583.693497

Fixed modifications: Carbamidomethyl (C) (apply to specified residues or termini only)

Variable modifications:

Q8 : Biotin:Thermo-21345 (Q)

Ions Score: 48 Expect: 5.1e-005

Matches : 17/86 fragment ions using 30 most intense peaks ([help](#))

| #  | b                  | b <sup>++</sup> | b <sup>*</sup> | b <sup>*++</sup> | b <sup>0</sup> | b <sup>0++</sup> | Seq. | y                  | y <sup>++</sup>   | y <sup>*</sup>     | y <sup>*++</sup> | y <sup>0</sup>     | y <sup>0++</sup> | #  |
|----|--------------------|-----------------|----------------|------------------|----------------|------------------|------|--------------------|-------------------|--------------------|------------------|--------------------|------------------|----|
| 1  | 148.075690         | 74.541483       |                |                  |                |                  | F    |                    |                   |                    |                  |                    |                  | 10 |
| 2  | <b>249.123369</b>  | 125.065322      |                |                  | 231.112804     | 116.060040       | T    | <b>1437.632342</b> | 719.319809        | 1420.605793        | 710.806535       | 1419.621777        | 710.314527       | 9  |
| 3  | <b>409.154018</b>  | 205.080647      |                |                  | 391.143453     | 196.075365       | C    | <b>1336.584663</b> | <b>668.795970</b> | 1319.558114        | 660.282695       | 1318.574098        | 659.790687       | 8  |
| 4  | <b>480.191132</b>  | 240.599204      |                |                  | 462.180567     | 231.593921       | A    | <b>1176.554014</b> | 588.780645        | 1159.527465        | 580.267371       | 1158.543449        | 579.775363       | 7  |
| 5  | <b>640.221781</b>  | 320.614529      |                |                  | 622.211216     | 311.609246       | C    | <b>1105.516900</b> | <b>553.262088</b> | <b>1088.490351</b> | 544.748814       | <b>1087.506335</b> | 544.256806       | 6  |
| 6  | 737.274545         | 369.140911      |                |                  | 719.263980     | 360.135628       | P    | <b>945.486251</b>  | 473.246764        | 928.459702         | 464.733489       | 927.475686         | 464.241481       | 5  |
| 7  | 852.301488         | 426.654382      |                |                  | 834.290923     | 417.649100       | D    | <b>848.433487</b>  | 424.720382        | 831.406938         | 416.207107       | 830.422922         | 415.715099       | 4  |
| 8  | <b>1291.526814</b> | 646.267045      | 1274.500265    | 637.753771       | 1273.516249    | 637.261763       | Q    | <b>733.406544</b>  | 367.206910        | 716.379995         | 358.693636       |                    |                  | 3  |
| 9  | <b>1438.595228</b> | 719.801252      | 1421.568679    | 711.287978       | 1420.584663    | 710.795970       | F    | 294.181218         | 147.594247        | 277.154669         | 139.080973       |                    |                  | 2  |
| 10 |                    |                 |                |                  |                |                  | K    | 147.112804         | 74.060040         | 130.086255         | 65.546765        |                    |                  | 1  |

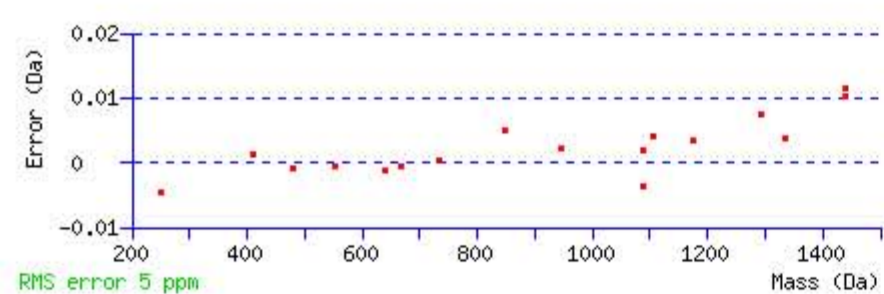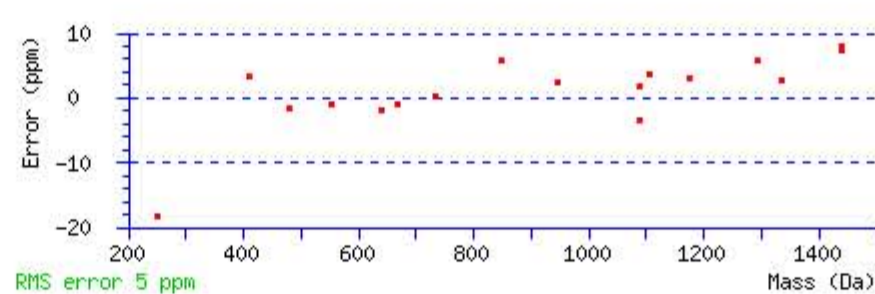

NCBI BLAST search of **FTCACPDQFK**

(Parameters: blastp, nr protein database, expect=20000, no filter, PAM30)

Other BLAST [web gateways](#)

## All matches to this query

| Score | $M_r(\text{calc})$ : | Delta     | Sequence                      |
|-------|----------------------|-----------|-------------------------------|
| 47.5  | 1583.693497          | 0.000311  | <a href="#">FTCACPDQFK</a>    |
| 1.8   | 1583.700470          | -0.006662 | <a href="#">FGEYHKDDPSSFR</a> |

# MASCOT SEARCH RESULTS

## Peptide View

MS/MS Fragmentation of **KEEFHEQSFR**

Found in **HABP2\_HUMAN**, Hyaluronan-binding protein 2 OS=Homo sapiens GN=HABP2 PE=1 SV=1

Match to Query 32617: 1646.782722 from(549.934850,3+) rtinseconds(1569) index(43295)

Title: Locus:1.1.1.3259.10 File:"2013-07-02 CLN FXIII 180 min 3rd F 4.wiff"

Data file C:\Program Files (x86)\Matrix Science\Mascot Daemon\mgf\9 FXIII 180 min 3rd\mascot\_daemon\_merge.mgf

Click mouse within plot area to zoom in by factor of two about that point

Or, Plot from  to  Da

Label all possible matches  Label matches used for scoring

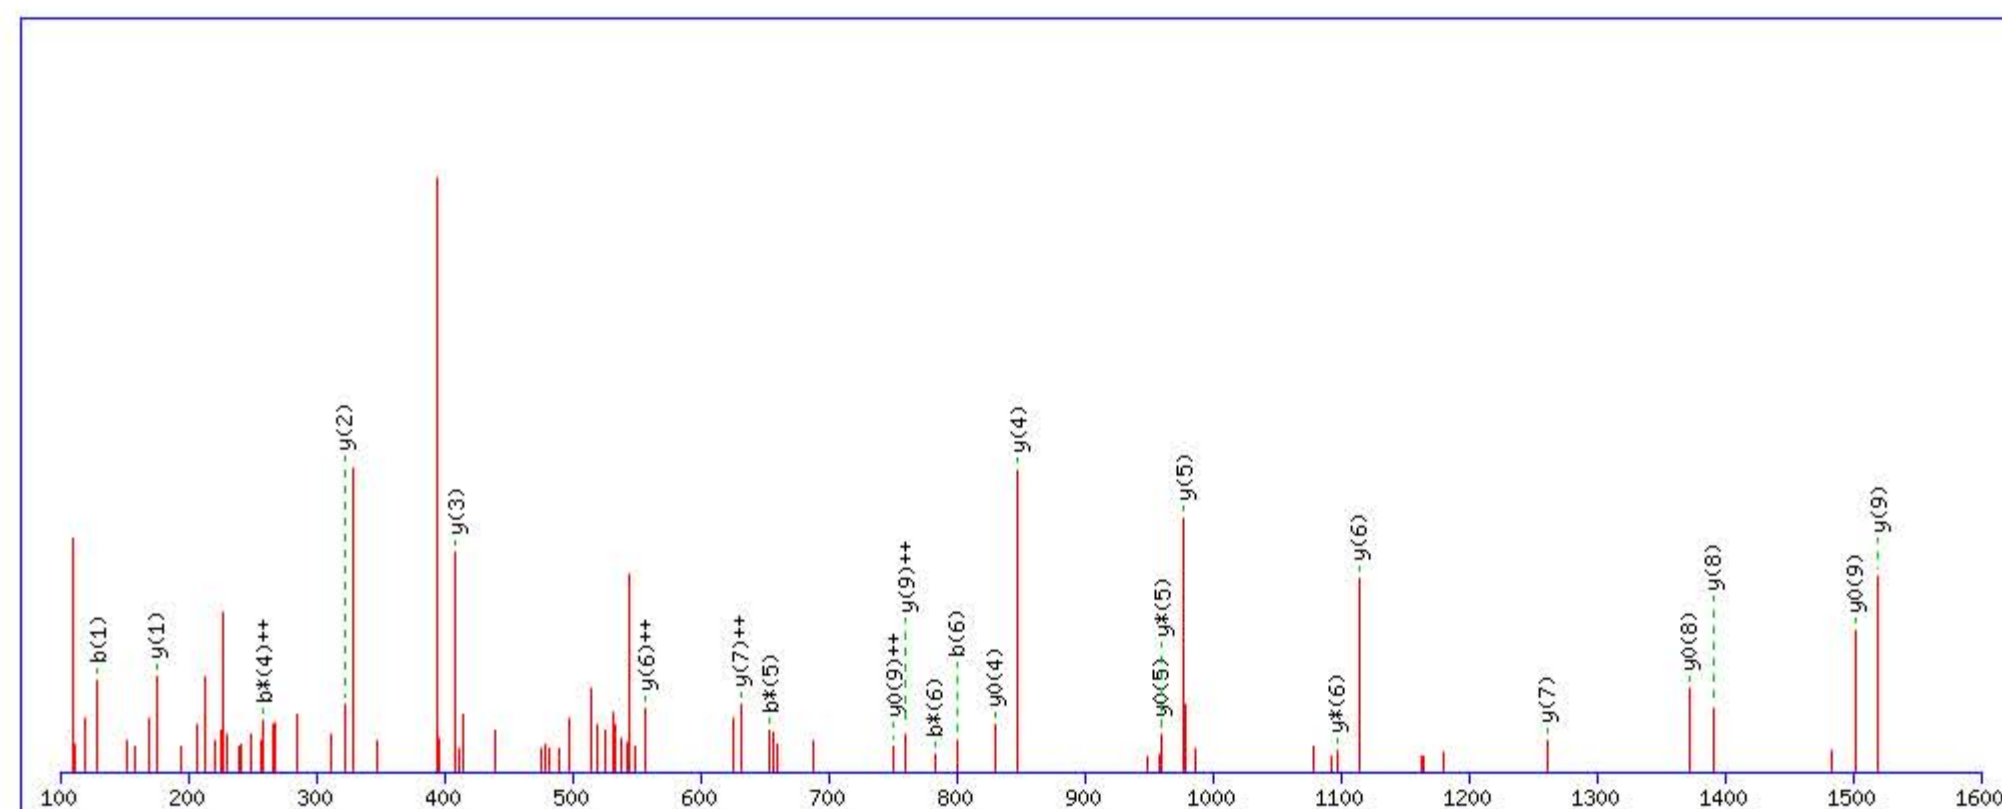

Monoisotopic mass of neutral peptide Mr(calc): 1646.787491

Fixed modifications: Carbamidomethyl (C) (apply to specified residues or termini only)

Variable modifications:

Q7 : Biotin:Thermo-21345 (Q)

Ions Score: 48 Expect: 0.00014

Matches : 24/102 fragment ions using 47 most intense peaks [\(help\)](#)

| #  | b                 | b <sup>++</sup> | b <sup>*</sup>    | b <sup>*++</sup>  | b <sup>0</sup> | b <sup>0++</sup> | Seq.     | y                  | y <sup>++</sup>   | y <sup>*</sup>     | y <sup>*++</sup> | y <sup>0</sup>     | y <sup>0++</sup>  | #         |
|----|-------------------|-----------------|-------------------|-------------------|----------------|------------------|----------|--------------------|-------------------|--------------------|------------------|--------------------|-------------------|-----------|
| 1  | <b>129.102239</b> | 65.054757       | 112.075690        | 56.541483         |                |                  | <b>K</b> |                    |                   |                    |                  |                    |                   | <b>10</b> |
| 2  | 258.144832        | 129.576054      | 241.118283        | 121.062780        | 240.134267     | 120.570772       | <b>E</b> | <b>1519.699825</b> | <b>760.353551</b> | 1502.673276        | 751.840276       | <b>1501.689260</b> | <b>751.348268</b> | <b>9</b>  |
| 3  | 387.187425        | 194.097351      | 370.160876        | 185.584076        | 369.176860     | 185.092068       | <b>E</b> | <b>1390.657232</b> | 695.832254        | 1373.630683        | 687.318980       | <b>1372.646667</b> | 686.826972        | <b>8</b>  |
| 4  | 534.255839        | 267.631558      | 517.229290        | <b>259.118283</b> | 516.245274     | 258.626275       | <b>F</b> | <b>1261.614639</b> | <b>631.310958</b> | 1244.588090        | 622.797683       | 1243.604074        | 622.305675        | <b>7</b>  |
| 5  | 671.314751        | 336.161014      | <b>654.288202</b> | 327.647739        | 653.304186     | 327.155731       | <b>H</b> | <b>1114.546225</b> | <b>557.776751</b> | <b>1097.519676</b> | 549.263476       | 1096.535660        | 548.771468        | <b>6</b>  |
| 6  | <b>800.357344</b> | 400.682310      | <b>783.330795</b> | 392.169036        | 782.346779     | 391.677028       | <b>E</b> | <b>977.487313</b>  | 489.247295        | <b>960.460764</b>  | 480.734020       | <b>959.476748</b>  | 480.242012        | <b>5</b>  |
| 7  | 1239.582670       | 620.294973      | 1222.556121       | 611.781699        | 1221.572105    | 611.289691       | <b>Q</b> | <b>848.444720</b>  | 424.725998        | 831.418171         | 416.212724       | <b>830.434155</b>  | 415.720716        | <b>4</b>  |
| 8  | 1326.614698       | 663.810987      | 1309.588149       | 655.297713        | 1308.604133    | 654.805705       | <b>S</b> | <b>409.219394</b>  | 205.113335        | 392.192845         | 196.600061       | 391.208829         | 196.108053        | <b>3</b>  |
| 9  | 1473.683112       | 737.345194      | 1456.656563       | 728.831920        | 1455.672547    | 728.339912       | <b>F</b> | <b>322.187366</b>  | 161.597321        | 305.160817         | 153.084047       |                    |                   | <b>2</b>  |
| 10 |                   |                 |                   |                   |                |                  | <b>R</b> | <b>175.118952</b>  | 88.063114         | 158.092403         | 79.549839        |                    |                   | <b>1</b>  |

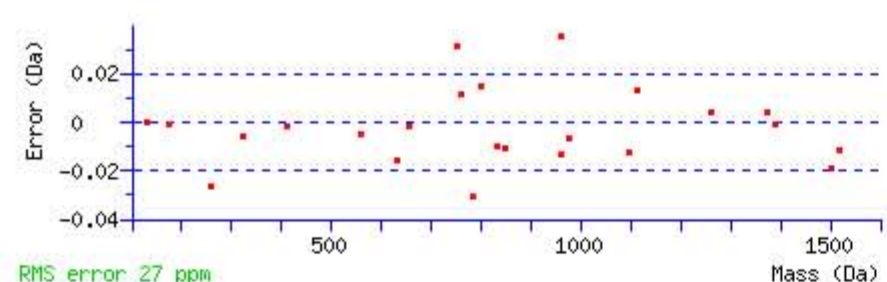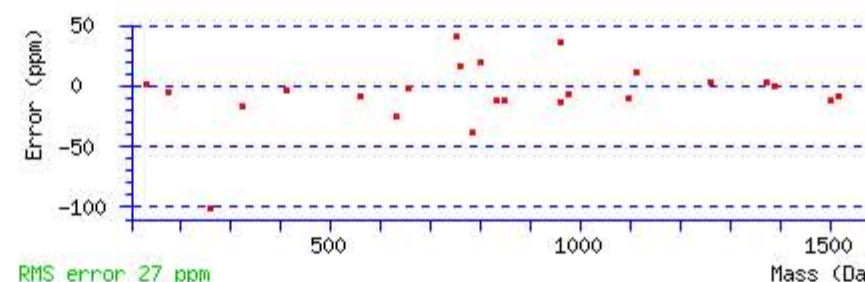

NCBI BLAST search of [KEEFHEQSFR](#)

(Parameters: blastp, nr protein database, expect=20000, no filter, PAM30)

Other BLAST [web gateways](#)

All matches to this query

| Score | Mr(calc):   | Delta     | Sequence                        |
|-------|-------------|-----------|---------------------------------|
| 48.1  | 1646.787491 | -0.004769 | <a href="#">KEEFHEQSFR</a>      |
| 6.6   | 1646.763474 | 0.019248  | <a href="#">KQEQLDDEEEK</a>     |
| 2.8   | 1646.804596 | -0.021874 | <a href="#">QEILTALDRDASCR</a>  |
| 1.8   | 1646.775589 | 0.007133  | <a href="#">KPGLEEAVESACAMR</a> |

# MASCOT Search Results

## Peptide View

MS/MS Fragmentation of **GQCLITQSPYYR**

Found in **HABP2\_HUMAN**, Hyaluronan-binding protein 2 OS=Homo sapiens GN=HABP2 PE=1 SV=1

Match to Query 37316: 1892.929032 from(631.983620,3+) rtinseconds(2109) index(46656)

Title: Locus:1.1.1.3447.5 File:"2013-07-02 CLN FXIII 180 min 3rd F 4.wiff"

Data file C:\Program Files (x86)\Matrix Science\Mascot Daemon\mgf\9 FXIII 180 min 3rd\mascot\_daemon\_merge.mgf

Click mouse within plot area to zoom in by factor of two about that point

Or, Plot from  to  Da

Label all possible matches  Label matches used for scoring

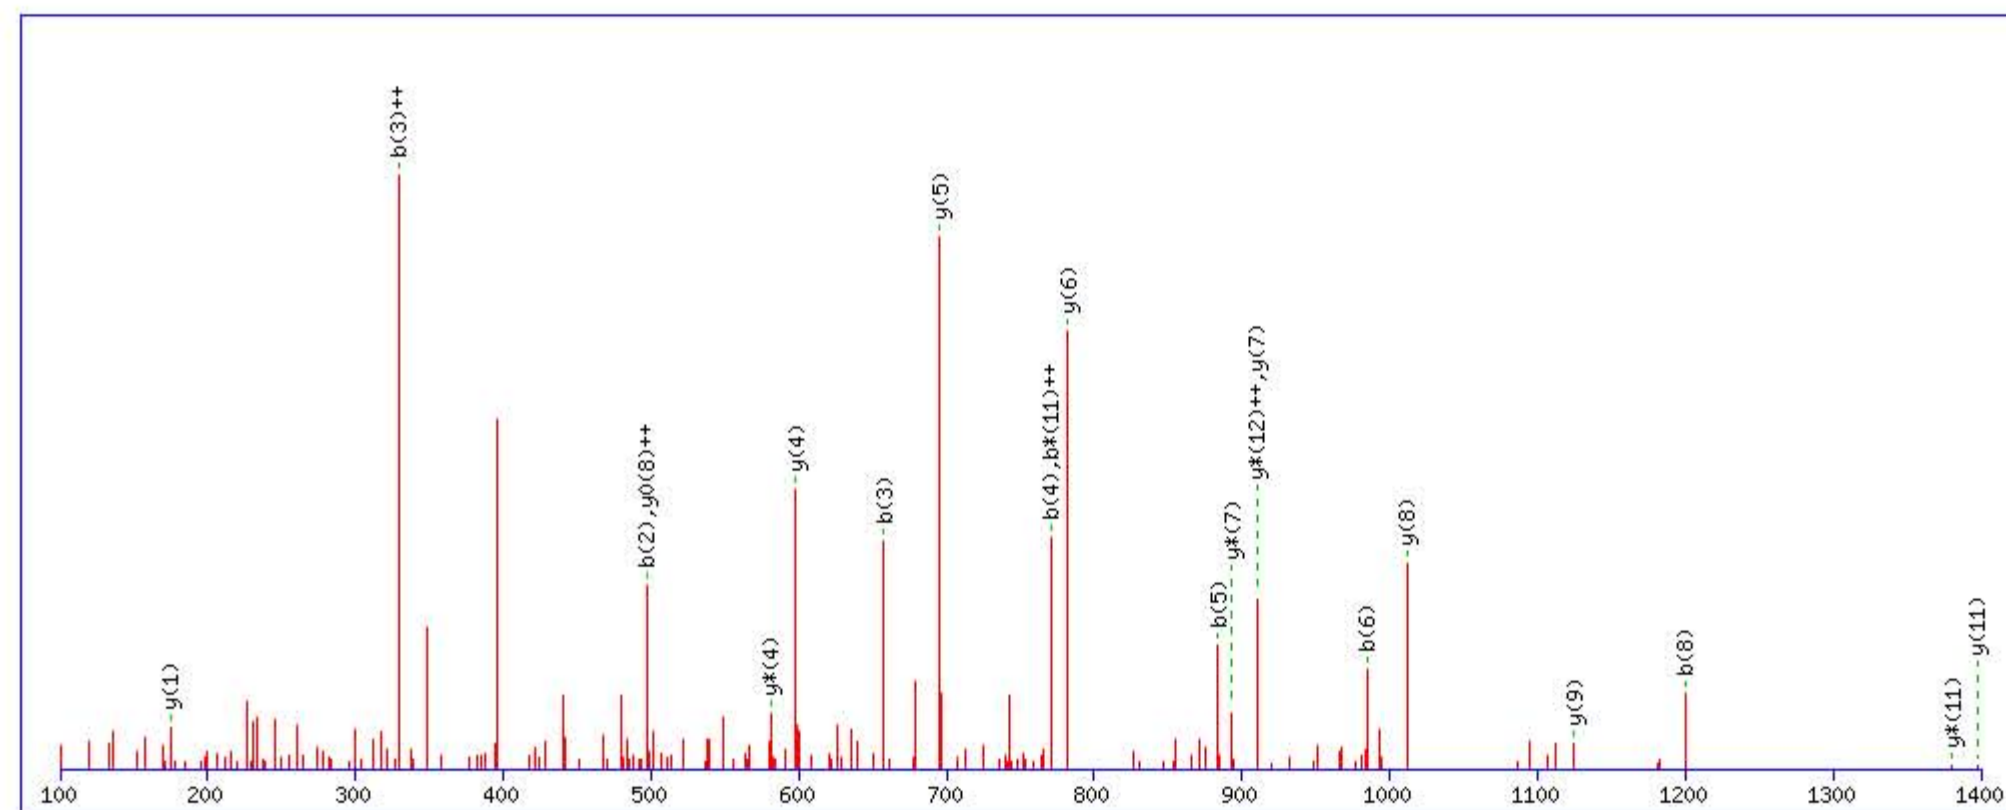

Monoisotopic mass of neutral peptide Mr(calc): 1892.927704

Fixed modifications: Carbamidomethyl (C) (apply to specified residues or termini only)

Variable modifications:

Q2 : Biotin:Thermo-21345 (Q)

Ions Score: 55 Expect: 8e-006

Matches : 21/122 fragment ions using 24 most intense peaks [\(help\)](#)

| #  | b                  | b <sup>++</sup>   | b <sup>+</sup> | b <sup>+++</sup>  | b <sup>0</sup> | b <sup>0++</sup> | Seq. | y                  | y <sup>++</sup> | y <sup>+</sup>     | y <sup>+++</sup>  | y <sup>0</sup> | y <sup>0++</sup>  | #  |
|----|--------------------|-------------------|----------------|-------------------|----------------|------------------|------|--------------------|-----------------|--------------------|-------------------|----------------|-------------------|----|
| 1  | 58.028740          | 29.518008         |                |                   |                |                  | G    |                    |                 |                    |                   |                |                   | 13 |
| 2  | <b>497.254066</b>  | 249.130671        | 480.227517     | 240.617397        |                |                  | Q    | 1836.913526        | 918.960401      | 1819.886977        | <b>910.447127</b> | 1818.902961    | 909.955119        | 12 |
| 3  | <b>657.284715</b>  | <b>329.145996</b> | 640.258166     | 320.632721        |                |                  | C    | <b>1397.688200</b> | 699.347738      | <b>1380.661651</b> | 690.834464        | 1379.677635    | 690.342456        | 11 |
| 4  | <b>770.368779</b>  | 385.688028        | 753.342230     | 377.174753        |                |                  | L    | 1237.657551        | 619.332414      | 1220.631002        | 610.819139        | 1219.646986    | 610.327131        | 10 |
| 5  | <b>883.452843</b>  | 442.230060        | 866.426294     | 433.716785        |                |                  | I    | <b>1124.573487</b> | 562.790382      | 1107.546938        | 554.277107        | 1106.562922    | 553.785099        | 9  |
| 6  | <b>984.500522</b>  | 492.753899        | 967.473973     | 484.240625        | 966.489957     | 483.748617       | T    | <b>1011.489423</b> | 506.248350      | 994.462874         | 497.735075        | 993.478858     | <b>497.243067</b> | 8  |
| 7  | 1112.559100        | 556.783188        | 1095.532551    | 548.269914        | 1094.548535    | 547.777906       | Q    | <b>910.441744</b>  | 455.724510      | <b>893.415195</b>  | 447.211236        | 892.431179     | 446.719228        | 7  |
| 8  | <b>1199.591128</b> | 600.299202        | 1182.564579    | 591.785928        | 1181.580563    | 591.293920       | S    | <b>782.383166</b>  | 391.695221      | 765.356617         | 383.181947        | 764.372601     | 382.689939        | 6  |
| 9  | 1296.643892        | 648.825584        | 1279.617343    | 640.312310        | 1278.633327    | 639.820302       | P    | <b>695.351138</b>  | 348.179207      | 678.324589         | 339.665933        |                |                   | 5  |
| 10 | 1393.696656        | 697.351966        | 1376.670107    | 688.838692        | 1375.686091    | 688.346684       | P    | <b>598.298374</b>  | 299.652825      | <b>581.271825</b>  | 291.139551        |                |                   | 4  |
| 11 | 1556.759985        | 778.883631        | 1539.733436    | <b>770.370356</b> | 1538.749420    | 769.878348       | Y    | 501.245610         | 251.126443      | 484.219061         | 242.613169        |                |                   | 3  |
| 12 | 1719.823314        | 860.415295        | 1702.796765    | 851.902021        | 1701.812749    | 851.410013       | Y    | 338.182281         | 169.594778      | 321.155732         | 161.081504        |                |                   | 2  |
| 13 |                    |                   |                |                   |                |                  | R    | <b>175.118952</b>  | 88.063114       | 158.092403         | 79.549839         |                |                   | 1  |

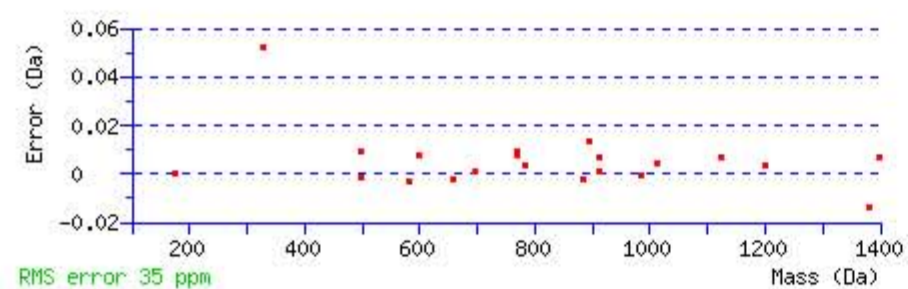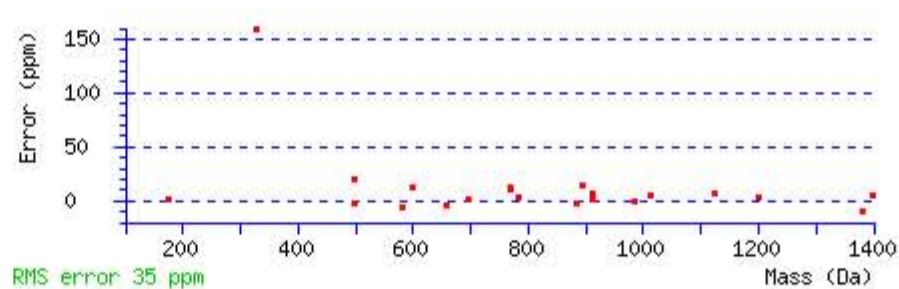

NCBI BLAST search of [GQCLITQSPYYR](#)

(Parameters: blastp, nr protein database, expect=20000, no filter, PAM30)

Other BLAST [web gateways](#)

All matches to this query

| Score | Mr(calc):   | Delta     | Sequence                            |
|-------|-------------|-----------|-------------------------------------|
| 55.4  | 1892.927704 | 0.001328  | <a href="#">GQCLITQSPYYR</a>        |
| 18.0  | 1892.927704 | 0.001328  | <a href="#">GQCLITQSPYYR</a>        |
| 1.1   | 1892.942764 | -0.013732 | <a href="#">CLLLHPAGHAEPAAAGSHR</a> |

# MASCOT SEARCH RESULTS

## Peptide View

MS/MS Fragmentation of **QEPSQGTTTFAVTSILR**

Found in **IGHA1\_HUMAN**, Ig alpha-1 chain C region OS=Homo sapiens GN=IGHA1 PE=1 SV=2

Match to Query 42252: 2146.103442 from(716.375090,3+) rtinseconds(2469) index(34375)

Title: Locus:1.1.1.3523.8 File:"2013-07-02 CLN FXIII 180 min 3rd F 3.wiff"

Data file C:\Program Files (x86)\Matrix Science\Mascot Daemon\mgf9 FXIII 180 min 3rd\mascot\_daemon\_merge.mgf

Click mouse within plot area to zoom in by factor of two about that point

Or, Plot from  to  Da

Label all possible matches  Label matches used for scoring

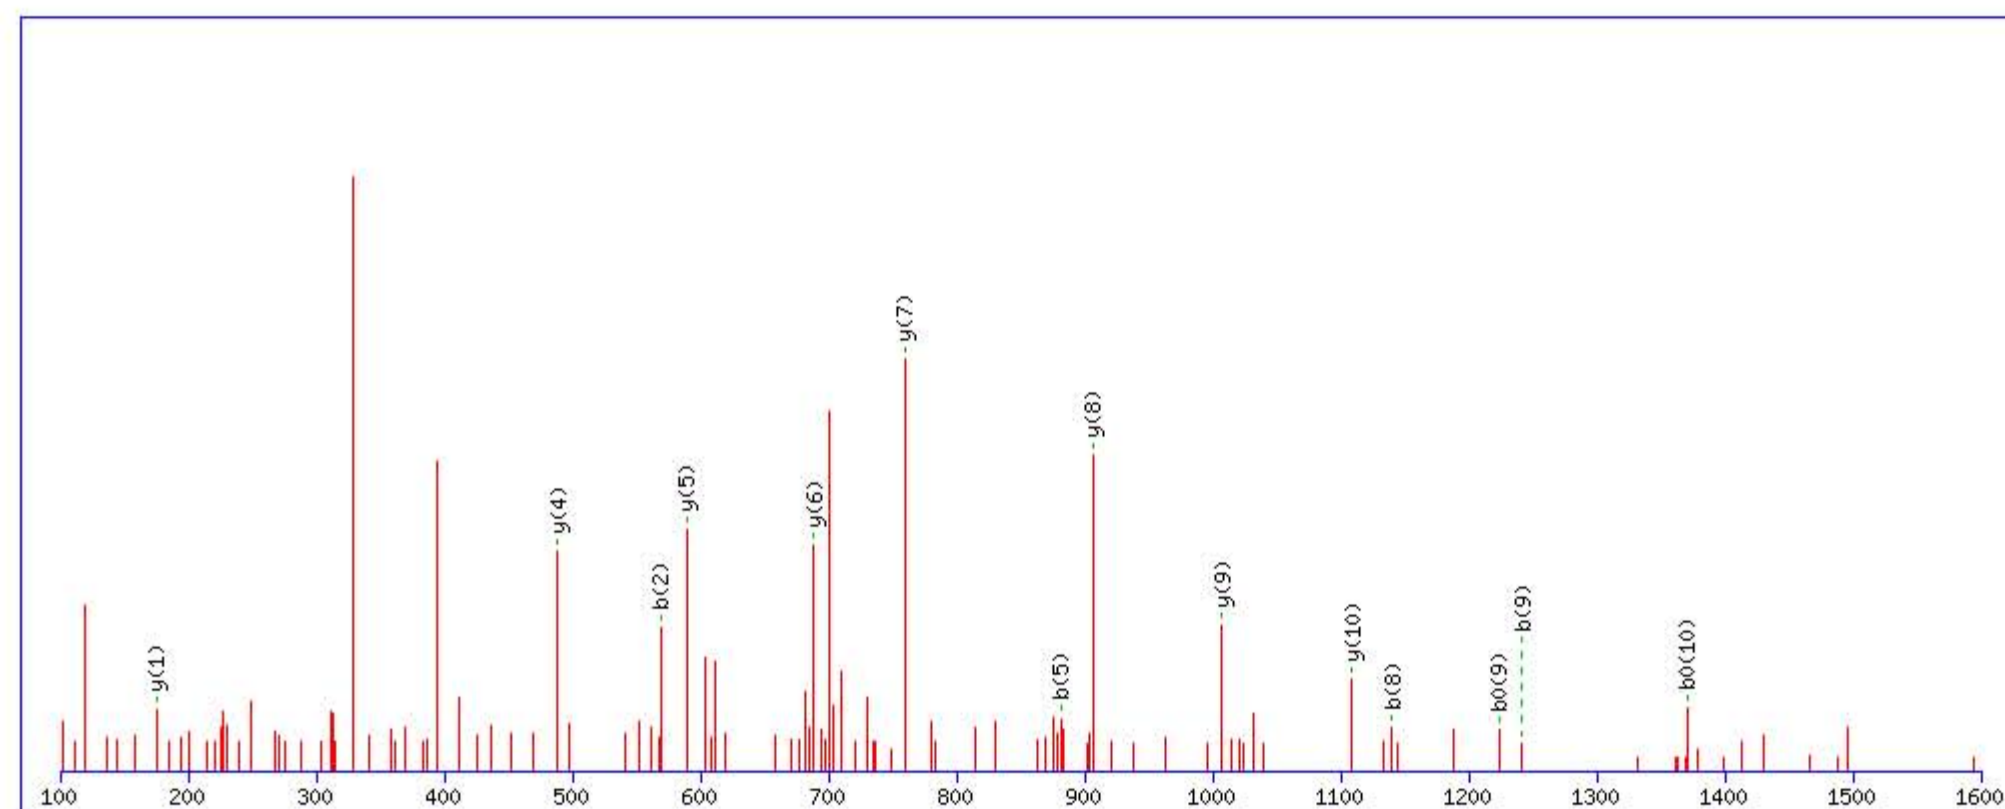

Monoisotopic mass of neutral peptide Mr(calc): 2146.109253

Fixed modifications: Carbamidomethyl (C) (apply to specified residues or termini only)

Variable modifications:

Q1 : Biotin:Thermo-21345 (Q)

Ions Score: 37 Expect: 0.006

Matches : 14/184 fragment ions using 29 most intense peaks [\(help\)](#)

| #  | b                  | b <sup>++</sup> | b <sup>*</sup> | b <sup>*++</sup> | b <sup>0</sup>     | b <sup>0++</sup> | Seq. | y                  | y <sup>++</sup> | y <sup>*</sup> | y <sup>*++</sup> | y <sup>0</sup> | y <sup>0++</sup> | #  |
|----|--------------------|-----------------|----------------|------------------|--------------------|------------------|------|--------------------|-----------------|----------------|------------------|----------------|------------------|----|
| 1  | 440.232602         | 220.619939      | 423.206053     | 212.106664       |                    |                  | Q    |                    |                 |                |                  |                |                  | 17 |
| 2  | <b>569.275195</b>  | 285.141236      | 552.248646     | 276.627961       | 551.264630         | 276.135953       | E    | 1707.891193        | 854.449235      | 1690.864644    | 845.935960       | 1689.880628    | 845.443952       | 16 |
| 3  | 666.327959         | 333.667618      | 649.301410     | 325.154343       | 648.317394         | 324.662335       | P    | 1578.848600        | 789.927938      | 1561.822051    | 781.414664       | 1560.838035    | 780.922656       | 15 |
| 4  | 753.359987         | 377.183632      | 736.333438     | 368.670357       | 735.349422         | 368.178349       | S    | 1481.795836        | 741.401556      | 1464.769287    | 732.888282       | 1463.785271    | 732.396274       | 14 |
| 5  | <b>881.418565</b>  | 441.212921      | 864.392016     | 432.699646       | 863.408000         | 432.207638       | Q    | 1394.763808        | 697.885542      | 1377.737259    | 689.372268       | 1376.753243    | 688.880260       | 13 |
| 6  | 938.440029         | 469.723653      | 921.413480     | 461.210378       | 920.429464         | 460.718370       | G    | 1266.705230        | 633.856253      | 1249.678681    | 625.342979       | 1248.694665    | 624.850971       | 12 |
| 7  | 1039.487708        | 520.247492      | 1022.461159    | 511.734218       | 1021.477143        | 511.242210       | T    | 1209.683766        | 605.345521      | 1192.657217    | 596.832247       | 1191.673201    | 596.340239       | 11 |
| 8  | <b>1140.535387</b> | 570.771332      | 1123.508838    | 562.258057       | 1122.524822        | 561.766049       | T    | <b>1108.636087</b> | 554.821682      | 1091.609538    | 546.308407       | 1090.625522    | 545.816399       | 10 |
| 9  | <b>1241.583066</b> | 621.295171      | 1224.556517    | 612.781897       | <b>1223.572501</b> | 612.289889       | T    | <b>1007.588408</b> | 504.297842      | 990.561859     | 495.784568       | 989.577843     | 495.292560       | 9  |
| 10 | 1388.651480        | 694.829378      | 1371.624931    | 686.316104       | <b>1370.640915</b> | 685.824096       | F    | <b>906.540729</b>  | 453.774003      | 889.514180     | 445.260728       | 888.530164     | 444.768720       | 8  |
| 11 | 1459.688594        | 730.347935      | 1442.662045    | 721.834661       | 1441.678029        | 721.342653       | A    | <b>759.472315</b>  | 380.239796      | 742.445766     | 371.726521       | 741.461750     | 371.234513       | 7  |
| 12 | 1558.757008        | 779.882142      | 1541.730459    | 771.368868       | 1540.746443        | 770.876860       | V    | <b>688.435201</b>  | 344.721239      | 671.408652     | 336.207964       | 670.424636     | 335.715956       | 6  |
| 13 | 1659.804687        | 830.405982      | 1642.778138    | 821.892707       | 1641.794122        | 821.400699       | T    | <b>589.366787</b>  | 295.187032      | 572.340238     | 286.673757       | 571.356222     | 286.181749       | 5  |
| 14 | 1746.836715        | 873.921996      | 1729.810166    | 865.408721       | 1728.826150        | 864.916713       | S    | <b>488.319108</b>  | 244.663192      | 471.292559     | 236.149918       | 470.308543     | 235.657910       | 4  |
| 15 | 1859.920779        | 930.464028      | 1842.894230    | 921.950753       | 1841.910214        | 921.458745       | I    | 401.287080         | 201.147178      | 384.260531     | 192.633903       |                |                  | 3  |
| 16 | 1973.004843        | 987.006060      | 1955.978294    | 978.492785       | 1954.994278        | 978.000777       | L    | 288.203016         | 144.605146      | 271.176467     | 136.091872       |                |                  | 2  |
| 17 |                    |                 |                |                  |                    |                  | R    | <b>175.118952</b>  | 88.063114       | 158.092403     | 79.549840        |                |                  | 1  |

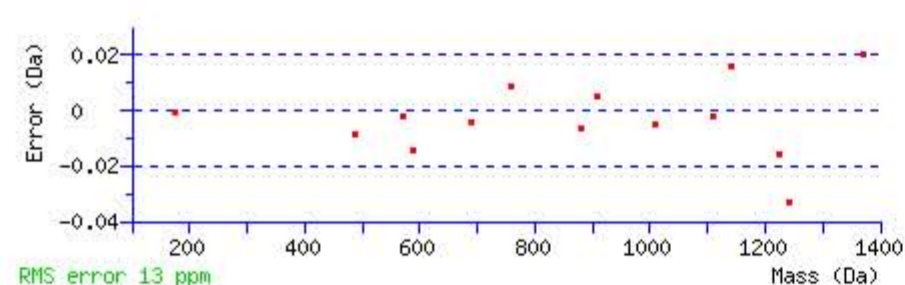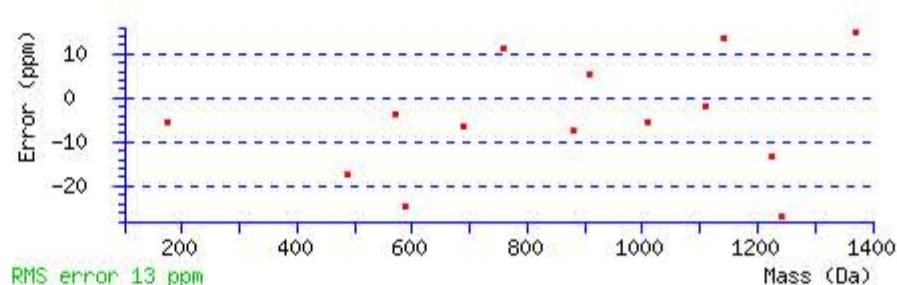

NCBI BLAST search of **QEPSQGTTTFAVTSILR**

(Parameters: blastp, nr protein database, expect=20000, no filter, PAM30)

Other BLAST [web gateways](#)

All matches to this query

| Score | Mr(calc):   | Delta     | Sequence                          |
|-------|-------------|-----------|-----------------------------------|
| 36.7  | 2146.109253 | -0.005811 | <a href="#">QEPSQGTTTFAVTSILR</a> |
| 34.6  | 2146.109253 | -0.005811 | <a href="#">QEPSQGTTTFAVTSILR</a> |

# Mascot Search Results

## Peptide View

MS/MS Fragmentation of **QEPSQGTTFVAVTSILR**

Found in **IGHA1\_HUMAN**, Ig alpha-1 chain C region OS=Homo sapiens GN=IGHA1 PE=1 SV=2

Match to Query 42253: 2146.106202 from(716.376010,3+) rtinseconds(2503) index(34614)

Title: Locus:1.1.1.3535.18 File:"2013-07-02 CLN FXIII 180 min 3rd F 3.wiff"

Data file C:\Program Files (x86)\Matrix Science\Mascot Daemon\mgf9 FXIII 180 min 3rd\mascot\_daemon\_merge.mgf

Click mouse within plot area to zoom in by factor of two about that point

Or, Plot from 100 to 1700 Da Full range

Label all possible matches  Label matches used for scoring

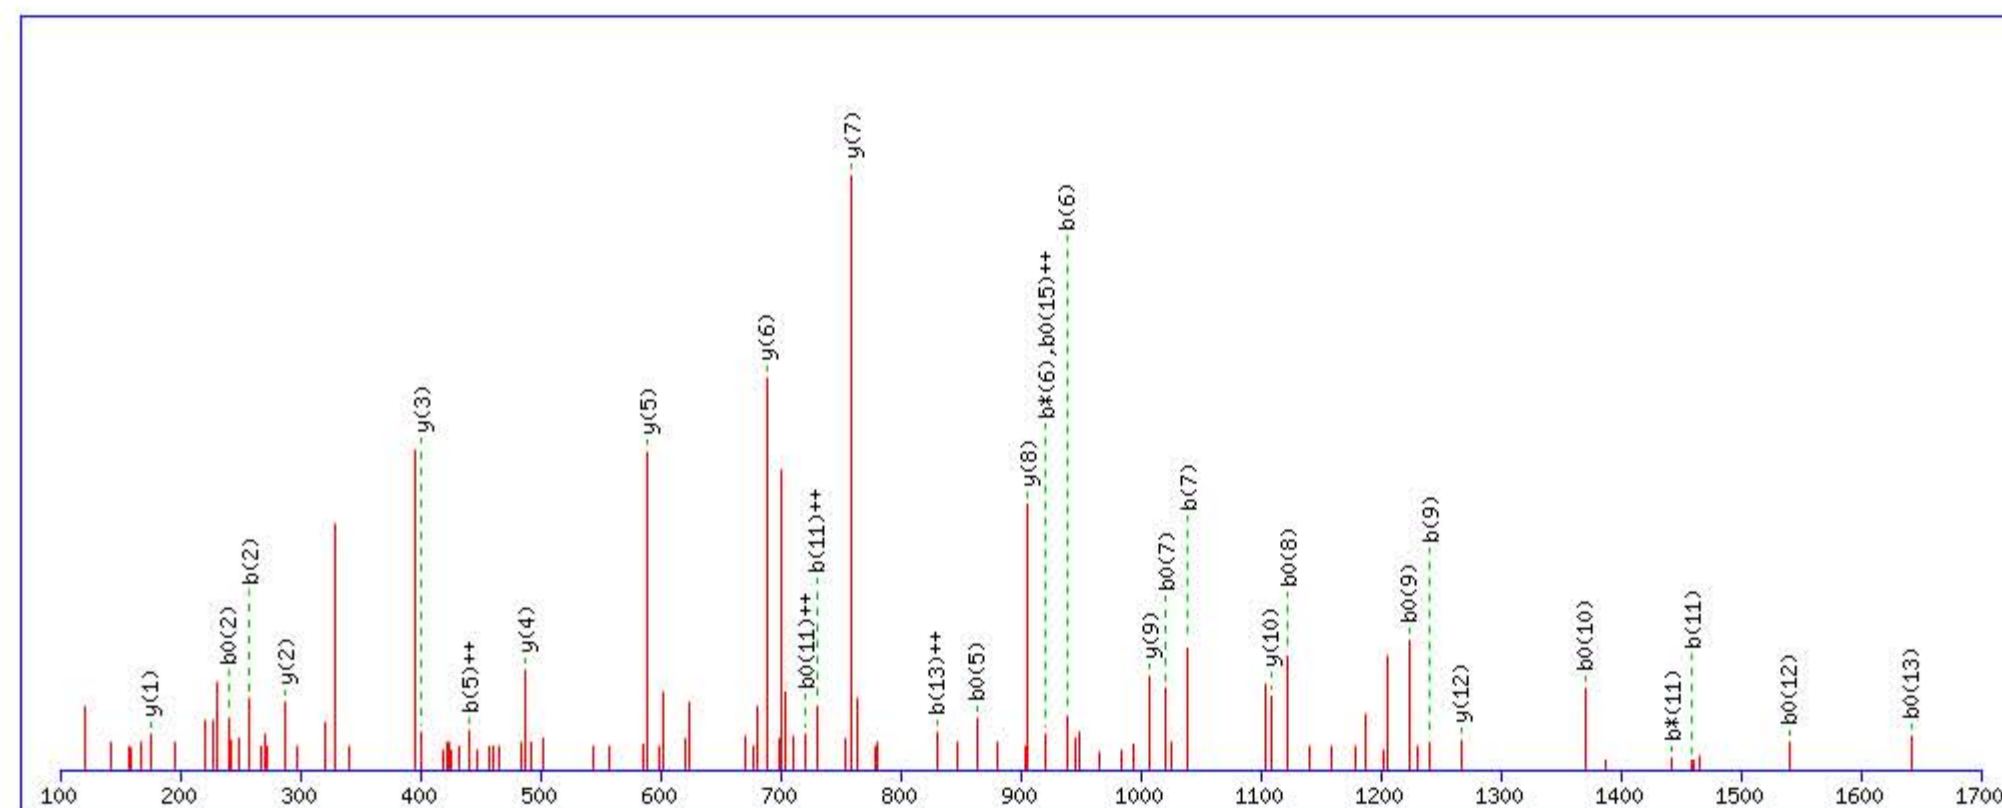

Monoisotopic mass of neutral peptide Mr(calc): 2146.109253

Fixed modifications: Carbamidomethyl (C) (apply to specified residues or termini only)

Variable modifications:

Q5 : Biotin:Thermo-21345 (Q)

Ions Score: 59 Expect: 3.5e-005

Matches : 31/184 fragment ions using 56 most intense peaks [\(help\)](#)

| #  | b           | b <sup>++</sup> | b <sup>*</sup> | b <sup>+++</sup> | b <sup>0</sup> | b <sup>0++</sup> | Seq. | y           | y <sup>++</sup> | y <sup>*</sup> | y <sup>+++</sup> | y <sup>0</sup> | y <sup>0++</sup> | #  |
|----|-------------|-----------------|----------------|------------------|----------------|------------------|------|-------------|-----------------|----------------|------------------|----------------|------------------|----|
| 1  | 129.065854  | 65.036565       | 112.039305     | 56.523291        |                |                  | Q    |             |                 |                |                  |                |                  | 17 |
| 2  | 258.108447  | 129.557862      | 241.081898     | 121.044587       | 240.097882     | 120.552579       | E    | 2019.057941 | 1010.032609     | 2002.031392    | 1001.519334      | 2001.047376    | 1001.027326      | 16 |
| 3  | 355.161211  | 178.084244      | 338.134662     | 169.570969       | 337.150646     | 169.078961       | P    | 1890.015348 | 945.511312      | 1872.988799    | 936.998038       | 1872.004783    | 936.506030       | 15 |
| 4  | 442.193239  | 221.600258      | 425.166690     | 213.086983       | 424.182674     | 212.594975       | S    | 1792.962584 | 896.984930      | 1775.936035    | 888.471656       | 1774.952019    | 887.979648       | 14 |
| 5  | 881.418565  | 441.212921      | 864.392016     | 432.699646       | 863.408000     | 432.207638       | Q    | 1705.930556 | 853.468916      | 1688.904007    | 844.955642       | 1687.919991    | 844.463634       | 13 |
| 6  | 938.440029  | 469.723653      | 921.413480     | 461.210378       | 920.429464     | 460.718370       | G    | 1266.705230 | 633.856253      | 1249.678681    | 625.342979       | 1248.694665    | 624.850971       | 12 |
| 7  | 1039.487708 | 520.247492      | 1022.461159    | 511.734218       | 1021.477143    | 511.242210       | T    | 1209.683766 | 605.345521      | 1192.657217    | 596.832247       | 1191.673201    | 596.340239       | 11 |
| 8  | 1140.535387 | 570.771332      | 1123.508838    | 562.258057       | 1122.524822    | 561.766049       | T    | 1108.636087 | 554.821682      | 1091.609538    | 546.308407       | 1090.625522    | 545.816399       | 10 |
| 9  | 1241.583066 | 621.295171      | 1224.556517    | 612.781897       | 1223.572501    | 612.289889       | T    | 1007.588408 | 504.297842      | 990.561859     | 495.784568       | 989.577843     | 495.292560       | 9  |
| 10 | 1388.651480 | 694.829378      | 1371.624931    | 686.316104       | 1370.640915    | 685.824096       | F    | 906.540729  | 453.774003      | 889.514180     | 445.260728       | 888.530164     | 444.768720       | 8  |
| 11 | 1459.688594 | 730.347935      | 1442.662045    | 721.834661       | 1441.678029    | 721.342653       | A    | 759.472315  | 380.239796      | 742.445766     | 371.726521       | 741.461750     | 371.234513       | 7  |
| 12 | 1558.757008 | 779.882142      | 1541.730459    | 771.368868       | 1540.746443    | 770.876860       | V    | 688.435201  | 344.721239      | 671.408652     | 336.207964       | 670.424636     | 335.715956       | 6  |
| 13 | 1659.804687 | 830.405982      | 1642.778138    | 821.892707       | 1641.794122    | 821.400699       | T    | 589.366787  | 295.187032      | 572.340238     | 286.673757       | 571.356222     | 286.181749       | 5  |
| 14 | 1746.836715 | 873.921996      | 1729.810166    | 865.408721       | 1728.826150    | 864.916713       | S    | 488.319108  | 244.663192      | 471.292559     | 236.149918       | 470.308543     | 235.657910       | 4  |
| 15 | 1859.920779 | 930.464028      | 1842.894230    | 921.950753       | 1841.910214    | 921.458745       | I    | 401.287080  | 201.147178      | 384.260531     | 192.633903       |                |                  | 3  |
| 16 | 1973.004843 | 987.006060      | 1955.978294    | 978.492785       | 1954.994278    | 978.000777       | L    | 288.203016  | 144.605146      | 271.176467     | 136.091872       |                |                  | 2  |
| 17 |             |                 |                |                  |                |                  | R    | 175.118952  | 88.063114       | 158.092403     | 79.549840        |                |                  | 1  |

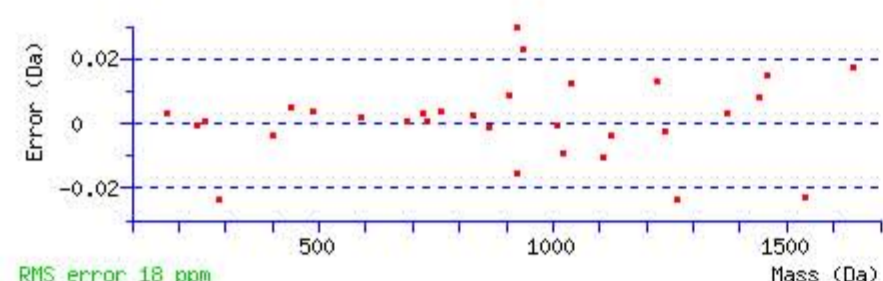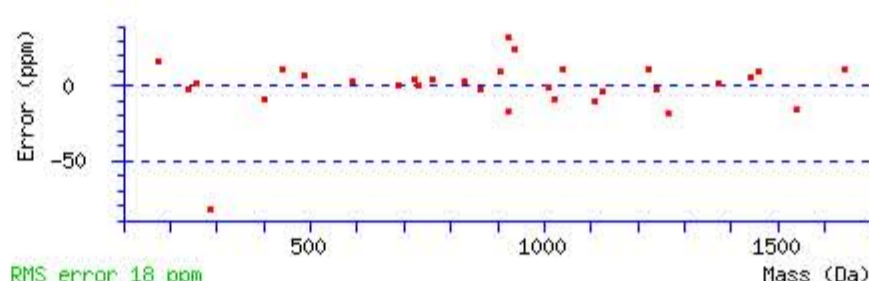

NCBI BLAST search of **QEPSQGTTFVAVTSILR**

(Parameters: blastp, nr protein database, expect=20000, no filter, PAM30)

Other BLAST [web gateways](#)

All matches to this query

| Score | Mr(calc):   | Delta     | Sequence                          |
|-------|-------------|-----------|-----------------------------------|
| 59.1  | 2146.109253 | -0.003051 | <a href="#">QEPSQGTTFVAVTSILR</a> |
| 56.2  | 2146.109253 | -0.003051 | <a href="#">QEPSQGTTFVAVTSILR</a> |

Mascot: <http://www.matrixscience.com/>

**Mascot Search Results**

**Peptide View**

MS/MS Fragmentation of **NFPPSQDASGDLYTTSSQLTLPATQCLAGK**

Found in **IGHA1\_HUMAN**, Ig alpha-1 chain C region OS=Homo sapiens GN=IGHA1 PE=1 SV=2

Match to Query 45404: 3478.661652 from(1160.561160,3+) rtinseconds(2582) index(35043)  
 Title: Locus:1.1.1.3562.24 File:"2013-07-02 CLN FXIII 180 min 3rd F 3.wiff"  
 Data file C:\Program Files (x86)\Matrix Science\Mascot Daemon\mgf9 FXIII 180 min 3rd\mascot\_daemon\_merge.mgf

Click mouse within plot area to zoom in by factor of two about that point

Or, Plot from [0] to [2600] Da

Label all possible matches  Label matches used for scoring

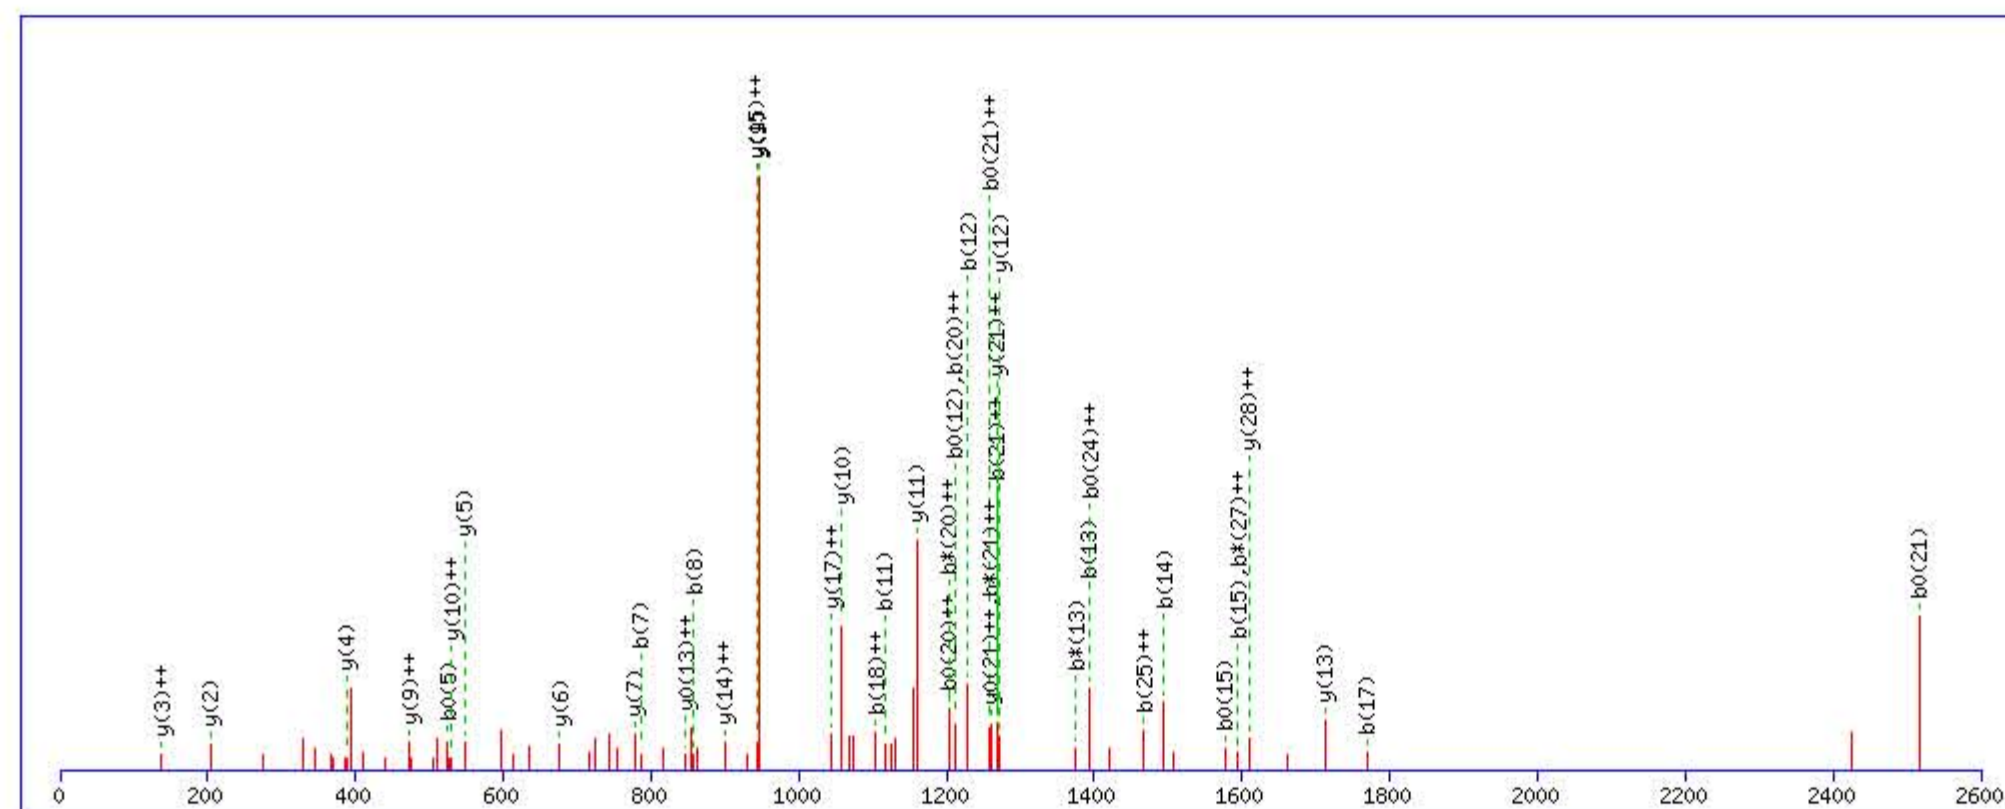

Monoisotopic mass of neutral peptide  $M_r(\text{calc})$ : 3478.674866  
 Fixed modifications: Carbamidomethyl (C) (apply to specified residues or termini only)  
 Variable modifications:  
 Q18 : Biotin:Thermo-21345 (Q)  
 Ions Score: 57 Expect: 8.6e-006  
 Matches : 43/328 fragment ions using 78 most intense peaks [\(help\)](#)

| #  | b                  | b <sup>++</sup>    | b <sup>*</sup>     | b <sup>++</sup> * | b <sup>0</sup>     | b <sup>0++</sup>   | Seq.     | y                  | y <sup>++</sup>    | y <sup>*</sup> | y <sup>++</sup> * | y <sup>0</sup> | y <sup>0++</sup>   | #         |
|----|--------------------|--------------------|--------------------|-------------------|--------------------|--------------------|----------|--------------------|--------------------|----------------|-------------------|----------------|--------------------|-----------|
| 1  | 115.050203         | 58.028740          | 98.023654          | 49.515465         |                    |                    | <b>N</b> |                    |                    |                |                   |                |                    | <b>30</b> |
| 2  | 262.118617         | 131.562946         | 245.092068         | 123.049672        |                    |                    | <b>F</b> | 3365.639210        | 1683.323243        | 3348.612661    | 1674.809968       | 3347.628645    | 1674.317960        | <b>29</b> |
| 3  | 359.171381         | 180.089328         | 342.144832         | 171.576054        |                    |                    | <b>P</b> | 3218.570796        | <b>1609.789036</b> | 3201.544247    | 1601.275761       | 3200.560231    | 1600.783753        | <b>28</b> |
| 4  | 456.224145         | 228.615710         | 439.197596         | 220.102436        |                    |                    | <b>P</b> | 3121.518032        | 1561.262654        | 3104.491483    | 1552.749379       | 3103.507467    | 1552.257371        | <b>27</b> |
| 5  | 543.256173         | 272.131725         | 526.229624         | 263.618450        | <b>525.245608</b>  | 263.126442         | <b>S</b> | 3024.465268        | 1512.736272        | 3007.438719    | 1504.222997       | 3006.454703    | 1503.730989        | <b>26</b> |
| 6  | 671.314751         | 336.161014         | 654.288202         | 327.647739        | 653.304186         | 327.155731         | <b>Q</b> | 2937.433240        | 1469.220258        | 2920.406691    | 1460.706983       | 2919.422675    | 1460.214975        | <b>25</b> |
| 7  | <b>786.341694</b>  | 393.674485         | 769.315145         | 385.161210        | 768.331129         | 384.669202         | <b>D</b> | 2809.374662        | 1405.190969        | 2792.348113    | 1396.677694       | 2791.364097    | 1396.185686        | <b>24</b> |
| 8  | <b>857.378808</b>  | 429.193042         | 840.352259         | 420.679767        | 839.368243         | 420.187759         | <b>A</b> | 2694.347719        | 1347.677497        | 2677.321170    | 1339.164223       | 2676.337154    | 1338.672215        | <b>23</b> |
| 9  | 944.410836         | 472.709056         | 927.384287         | 464.195781        | 926.400271         | 463.703773         | <b>S</b> | 2623.310605        | 1312.158941        | 2606.284056    | 1303.645666       | 2605.300040    | 1303.153658        | <b>22</b> |
| 10 | 1001.432300        | 501.219788         | 984.405751         | 492.706513        | 983.421735         | 492.214505         | <b>G</b> | 2536.278577        | <b>1268.642926</b> | 2519.252028    | 1260.129652       | 2518.268012    | <b>1259.637644</b> | <b>21</b> |
| 11 | <b>1116.459243</b> | 558.733260         | 1099.432694        | 550.219985        | 1098.448678        | 549.727977         | <b>D</b> | 2479.257113        | 1240.132195        | 2462.230564    | 1231.618920       | 2461.246548    | 1231.126912        | <b>20</b> |
| 12 | <b>1229.543307</b> | 615.275291         | 1212.516758        | 606.762017        | <b>1211.532742</b> | 606.270009         | <b>L</b> | 2364.230170        | 1182.618723        | 2347.203621    | 1174.105448       | 2346.219605    | 1173.613440        | <b>19</b> |
| 13 | <b>1392.606636</b> | 696.806956         | <b>1375.580087</b> | 688.293682        | 1374.596071        | 687.801673         | <b>Y</b> | 2251.146106        | 1126.076691        | 2234.119557    | 1117.563416       | 2233.135541    | 1117.071408        | <b>18</b> |
| 14 | <b>1493.654315</b> | 747.330796         | 1476.627766        | 738.817521        | 1475.643750        | 738.325513         | <b>T</b> | 2088.082777        | <b>1044.545026</b> | 2071.056228    | 1036.031752       | 2070.072212    | 1035.539744        | <b>17</b> |
| 15 | <b>1594.701994</b> | 797.854635         | 1577.675445        | 789.341361        | <b>1576.691429</b> | 788.849353         | <b>T</b> | 1987.035098        | 994.021187         | 1970.008549    | 985.507913        | 1969.024533    | 985.015905         | <b>16</b> |
| 16 | 1681.734022        | 841.370649         | 1664.707473        | 832.857375        | 1663.723457        | 832.365367         | <b>S</b> | 1885.987419        | <b>943.497348</b>  | 1868.960870    | 934.984073        | 1867.976854    | 934.492065         | <b>15</b> |
| 17 | <b>1768.766050</b> | 884.886663         | 1751.739501        | 876.373389        | 1750.755485        | 875.881381         | <b>S</b> | 1798.955391        | <b>899.981334</b>  | 1781.928842    | 891.468059        | 1780.944826    | 890.976051         | <b>14</b> |
| 18 | 2207.991376        | <b>1104.499326</b> | 2190.964827        | 1095.986051       | 2189.980811        | 1095.494043        | <b>Q</b> | <b>1711.923363</b> | 856.465320         | 1694.896814    | 847.952045        | 1693.912798    | <b>847.460037</b>  | <b>13</b> |
| 19 | 2321.075440        | 1161.041358        | 2304.048891        | 1152.528083       | 2303.064875        | 1152.036075        | <b>L</b> | <b>1272.698037</b> | 636.852657         | 1255.671488    | 628.339382        | 1254.687472    | 627.847374         | <b>12</b> |
| 20 | 2422.123119        | <b>1211.565197</b> | 2405.096570        | 1203.051923       | 2404.112554        | 1202.559915        | <b>T</b> | <b>1159.613973</b> | 580.310625         | 1142.587424    | 571.797350        | 1141.603408    | 571.305342         | <b>11</b> |
| 21 | 2535.207183        | <b>1268.107229</b> | 2518.180634        | 1259.593955       | <b>2517.196618</b> | <b>1259.101947</b> | <b>L</b> | <b>1058.566294</b> | <b>529.786785</b>  | 1041.539745    | 521.273511        | 1040.555729    | 520.781503         | <b>10</b> |
| 22 | 2632.259947        | 1316.633611        | 2615.233398        | 1308.120337       | 2614.249382        | 1307.628329        | <b>P</b> | <b>945.482230</b>  | <b>473.244753</b>  | 928.455681     | 464.731479        | 927.471665     | 464.239471         | <b>9</b>  |
| 23 | 2703.297061        | 1352.152169        | 2686.270512        | 1343.638894       | 2685.286496        | 1343.146886        | <b>A</b> | 848.429466         | 424.718371         | 831.402917     | 416.205097        | 830.418901     | 415.713089         | <b>8</b>  |
| 24 | 2804.344740        | 1402.676008        | 2787.318191        | 1394.162733       | 2786.334175        | <b>1393.670725</b> | <b>T</b> | <b>777.392352</b>  | 389.199814         | 760.365803     | 380.686540        | 759.381787     | 380.194532         | <b>7</b>  |
| 25 | 2932.403318        | <b>1466.705297</b> | 2915.376769        | 1458.192022       | 2914.392753        | 1457.700015        | <b>Q</b> | <b>676.344673</b>  | 338.675975         | 659.318124     | 330.162700        |                |                    | <b>6</b>  |
| 26 | 3092.433967        | 1546.720621        | 3075.407418        | 1538.207347       | 3074.423402        | 1537.715339        | <b>C</b> | <b>548.286095</b>  | 274.646686         | 531.259546     | 266.133411        |                |                    | <b>5</b>  |
| 27 | 3205.518031        | 1603.262653        | 3188.491482        | 1594.749379       | 3187.507466        | 1594.257371        | <b>L</b> | <b>388.255446</b>  | 194.631361         | 371.228897     | 186.118087        |                |                    | <b>4</b>  |
| 28 | 3276.555145        | 1638.781211        | 3259.528596        | 1630.267936       | 3258.544580        | 1629.775928        | <b>A</b> | 275.171382         | <b>138.089329</b>  | 258.144833     | 129.576055        |                |                    | <b>3</b>  |
| 29 | 3333.576609        | 1667.291943        | 3316.550060        | 1658.778668       | 3315.566044        | 1658.286660        | <b>G</b> | <b>204.134268</b>  | 102.570772         | 187.107719     | 94.057497         |                |                    | <b>2</b>  |
| 30 |                    |                    |                    |                   |                    |                    | <b>K</b> | 147.112804         | 74.060040          | 130.086255     | 65.546765         |                |                    | <b>1</b>  |

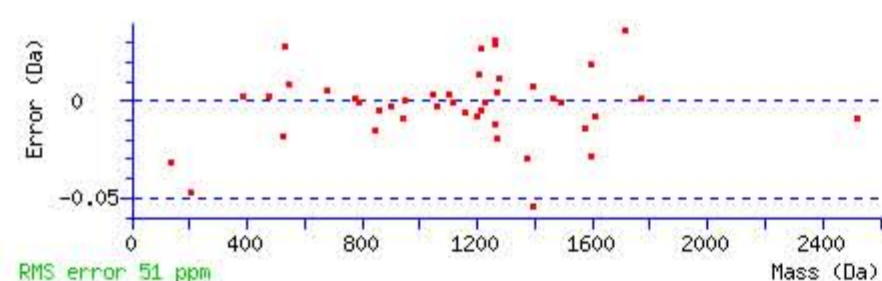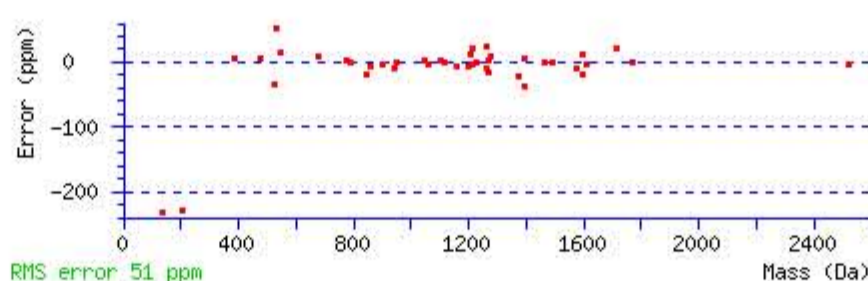

NCBI BLAST search of **NFPPSQDASGDLYTTSSQLTLPATQCLAGK**

(Parameters: blastp, nr protein database, expect=20000, no filter, PAM30)

Other BLAST [web gateways](#)

**All matches to this query**

| Score | $M_r(\text{calc})$ : | Delta     | Sequence                                       |
|-------|----------------------|-----------|------------------------------------------------|
| 56.6  | 3478.674866          | -0.013214 | <a href="#">NFPPSQDASGDLYTTSSQLTLPATQCLAGK</a> |
| 20.2  | 3478.674866          | -0.013214 | <a href="#">NFPPSQDASGDLYTTSSQLTLPATQCLAGK</a> |
| 17.4  | 3478.674866          | -0.013214 | <a href="#">NFPPSQDASGDLYTTSSQLTLPATQCLAGK</a> |
| 0.5   | 3478.617325          | 0.044327  | <a href="#">INRDPSTFLLSYSEYVILNEDCQTSR</a>     |



**Peptide View**

MS/MS Fragmentation of **GDTFSCMVGHEALPLAFTQK**

Found in **IGHA1\_HUMAN**, Ig alpha-1 chain C region OS=Homo sapiens GN=IGHA1 PE=1 SV=2

Match to Query 48765: 2519.197392 from(840.739740,3+) rtinseconds(2568) index(34971)

Title: Locus:1.1.1.3557.7 File:"2013-07-02 CLN FXIII 180 min 3rd F 3.wiff"

Data file C:\Program Files (x86)\Matrix Science\Mascot Daemon\mgf9 FXIII 180 min 3rd\mascot\_daemon\_merge.mgf

Click mouse within plot area to zoom in by factor of two about that point

Or, Plot from  to  Da

Label all possible matches  Label matches used for scoring

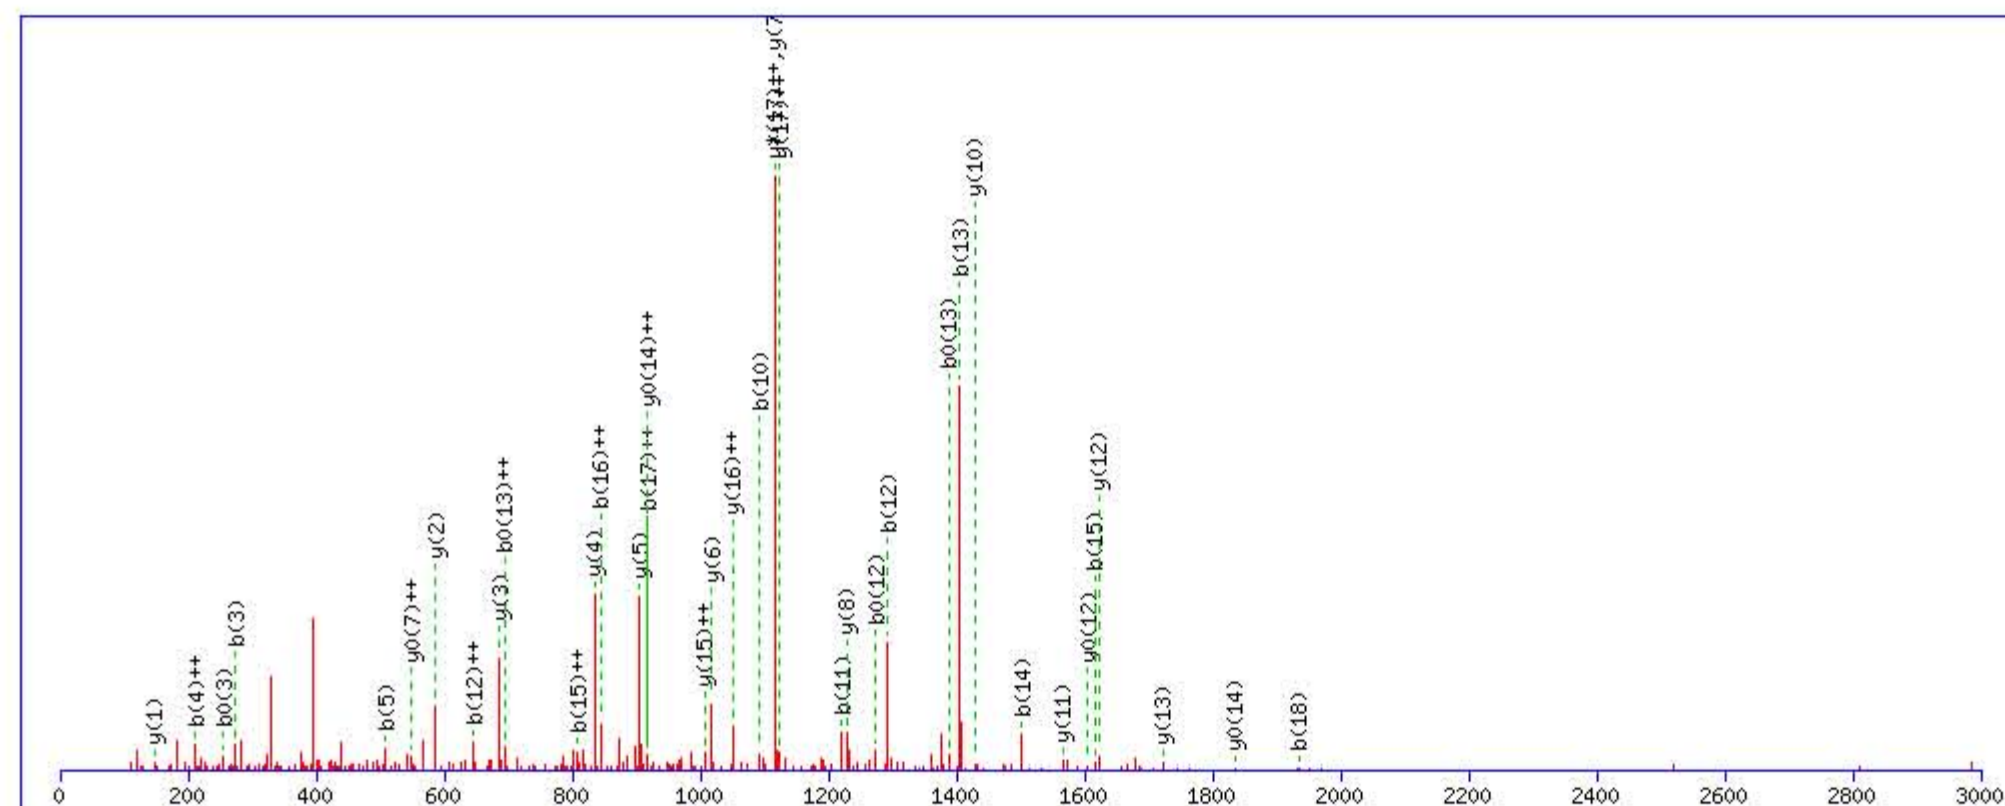

Monoisotopic mass of neutral peptide Mr(calc): 2519.201126  
 Fixed modifications: Carbamidomethyl (C) (apply to specified residues or termini only)  
 Variable modifications:  
 Q19 : Biotin:Thermo-21345 (Q)  
 Ions Score: 62 Expect: 2e-006  
 Matches : 38/186 fragment ions using 72 most intense peaks [\(help\)](#)

| #  | b                  | b <sup>++</sup>   | b <sup>*</sup> | b <sup>*++</sup> | b <sup>0</sup>     | b <sup>0++</sup>  | Seq.     | y                  | y <sup>++</sup>    | y <sup>*</sup> | y <sup>*++</sup>   | y <sup>0</sup>     | y <sup>0++</sup>  | #  |
|----|--------------------|-------------------|----------------|------------------|--------------------|-------------------|----------|--------------------|--------------------|----------------|--------------------|--------------------|-------------------|----|
| 1  | 58.028740          | 29.518008         |                |                  |                    |                   | <b>G</b> |                    |                    |                |                    |                    |                   | 20 |
| 2  | 173.055683         | 87.031479         |                |                  | 155.045118         | 78.026197         | <b>D</b> | 2463.186924        | 1232.097100        | 2446.160375    | 1223.583825        | 2445.176359        | 1223.091817       | 19 |
| 3  | <b>274.103362</b>  | 137.555319        |                |                  | <b>256.092797</b>  | 128.550037        | <b>T</b> | 2348.159981        | 1174.583628        | 2331.133432    | 1166.070354        | 2330.149416        | 1165.578346       | 18 |
| 4  | 421.171776         | <b>211.089526</b> |                |                  | 403.161211         | 202.084243        | <b>F</b> | 2247.112302        | <b>1124.059789</b> | 2230.085753    | <b>1115.546514</b> | 2229.101737        | 1115.054506       | 17 |
| 5  | <b>508.203804</b>  | 254.605540        |                |                  | 490.193239         | 245.600257        | <b>S</b> | 2100.043888        | <b>1050.525582</b> | 2083.017339    | 1042.012307        | 2082.033323        | 1041.520299       | 16 |
| 6  | 668.234453         | 334.620865        |                |                  | 650.223888         | 325.615582        | <b>C</b> | 2013.011860        | <b>1007.009568</b> | 1995.985311    | 998.496294         | 1995.001295        | 998.004286        | 15 |
| 7  | 799.274938         | 400.141107        |                |                  | 781.264373         | 391.135825        | <b>M</b> | 1852.981211        | 926.994244         | 1835.954662    | 918.480969         | <b>1834.970646</b> | <b>917.988961</b> | 14 |
| 8  | 898.343352         | 449.675314        |                |                  | 880.332787         | 440.670031        | <b>V</b> | <b>1721.940726</b> | 861.474001         | 1704.914177    | 852.960727         | 1703.930161        | 852.468719        | 13 |
| 9  | 955.364816         | 478.186046        |                |                  | 937.354251         | 469.180764        | <b>G</b> | <b>1622.872312</b> | 811.939794         | 1605.845763    | 803.426520         | <b>1604.861747</b> | 802.934512        | 12 |
| 10 | <b>1092.423728</b> | 546.715502        |                |                  | 1074.413163        | 537.710219        | <b>H</b> | <b>1565.850848</b> | 783.429062         | 1548.824299    | 774.915788         | 1547.840283        | 774.423780        | 11 |
| 11 | <b>1221.466321</b> | 611.236799        |                |                  | 1203.455756        | 602.231516        | <b>E</b> | <b>1428.791936</b> | 714.899606         | 1411.765387    | 706.386332         | 1410.781371        | 705.894324        | 10 |
| 12 | <b>1292.503435</b> | <b>646.755356</b> |                |                  | <b>1274.492870</b> | 637.750073        | <b>A</b> | 1299.749343        | 650.378310         | 1282.722794    | 641.865035         | 1281.738778        | 641.373027        | 9  |
| 13 | <b>1405.587499</b> | 703.297388        |                |                  | <b>1387.576934</b> | <b>694.292105</b> | <b>L</b> | <b>1228.712229</b> | 614.859753         | 1211.685680    | 606.346478         | 1210.701664        | 605.854470        | 8  |
| 14 | <b>1502.640263</b> | 751.823770        |                |                  | 1484.629698        | 742.818487        | <b>P</b> | <b>1115.628165</b> | 558.317721         | 1098.601616    | 549.804446         | 1097.617600        | <b>549.312438</b> | 7  |
| 15 | <b>1615.724327</b> | <b>808.365801</b> |                |                  | 1597.713762        | 799.360519        | <b>L</b> | <b>1018.575401</b> | 509.791339         | 1001.548852    | 501.278064         | 1000.564836        | 500.786056        | 6  |
| 16 | 1686.761441        | <b>843.884358</b> |                |                  | 1668.750876        | 834.879076        | <b>A</b> | <b>905.491337</b>  | 453.249307         | 888.464788     | 444.736032         | 887.480772         | 444.244024        | 5  |
| 17 | 1833.829855        | <b>917.418566</b> |                |                  | 1815.819290        | 908.413283        | <b>F</b> | <b>834.454223</b>  | 417.730750         | 817.427674     | 409.217475         | 816.443658         | 408.725467        | 4  |
| 18 | <b>1934.877534</b> | 967.942405        |                |                  | 1916.866969        | 958.937122        | <b>T</b> | <b>687.385809</b>  | 344.196543         | 670.359260     | 335.683268         | 669.375244         | 335.191260        | 3  |
| 19 | 2374.102860        | 1187.555068       | 2357.076311    | 1179.041793      | 2356.092295        | 1178.549785       | <b>Q</b> | <b>586.338130</b>  | 293.672703         | 569.311581     | 285.159429         |                    |                   | 2  |
| 20 |                    |                   |                |                  |                    |                   | <b>K</b> | <b>147.112804</b>  | 74.060040          | 130.086255     | 65.546765          |                    |                   | 1  |

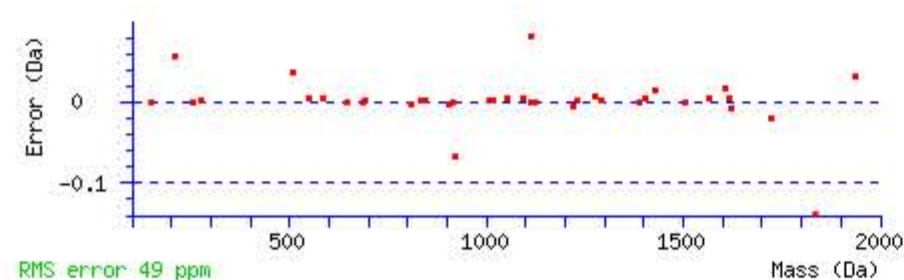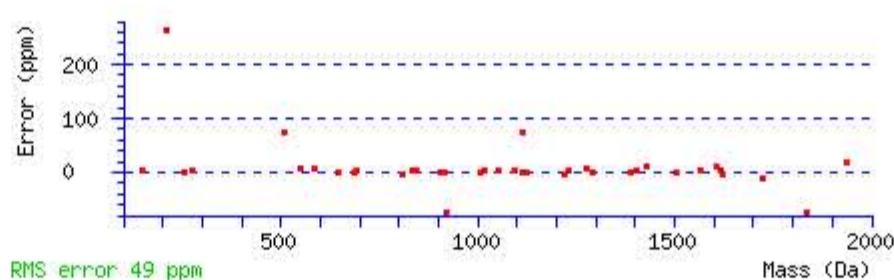

NCBI BLAST search of **GDTFSCMVGHEALPLAFTQK**  
 (Parameters: blastp, nr protein database, expect=20000, no filter, PAM30)  
 Other BLAST [web gateways](#)

**All matches to this query**

| Score | Mr(calc):   | Delta     | Sequence                                |
|-------|-------------|-----------|-----------------------------------------|
| 61.6  | 2519.201126 | -0.003734 | <a href="#">GDTFSCMVGHEALPLAFTQK</a>    |
| 0.9   | 2519.214783 | -0.017391 | <a href="#">KMQQENMKPQEQLTLEPYER</a>    |
| 0.2   | 2519.196243 | 0.001149  | <a href="#">EGSPHDNPTVQQIVQLSPVMQDT</a> |

# MASCOT SEARCH RESULTS

## Peptide View

MS/MS Fragmentation of **QEPSQGTTTFAVTSILR**

Found in **IGHA1\_HUMAN**, Ig alpha-1 chain C region OS=Homo sapiens GN=IGHA1 PE=1 SV=2

Match to Query 42252: 2146.103442 from(716.375090,3+) rtinseconds(2469) index(34375)

Title: Locus:1.1.1.3523.8 File:"2013-07-02 CLN FXIII 180 min 3rd F 3.wiff"

Data file C:\Program Files (x86)\Matrix Science\Mascot Daemon\mgf9 FXIII 180 min 3rd\mascot\_daemon\_merge.mgf

Click mouse within plot area to zoom in by factor of two about that point

Or, Plot from  to  Da

Label all possible matches  Label matches used for scoring

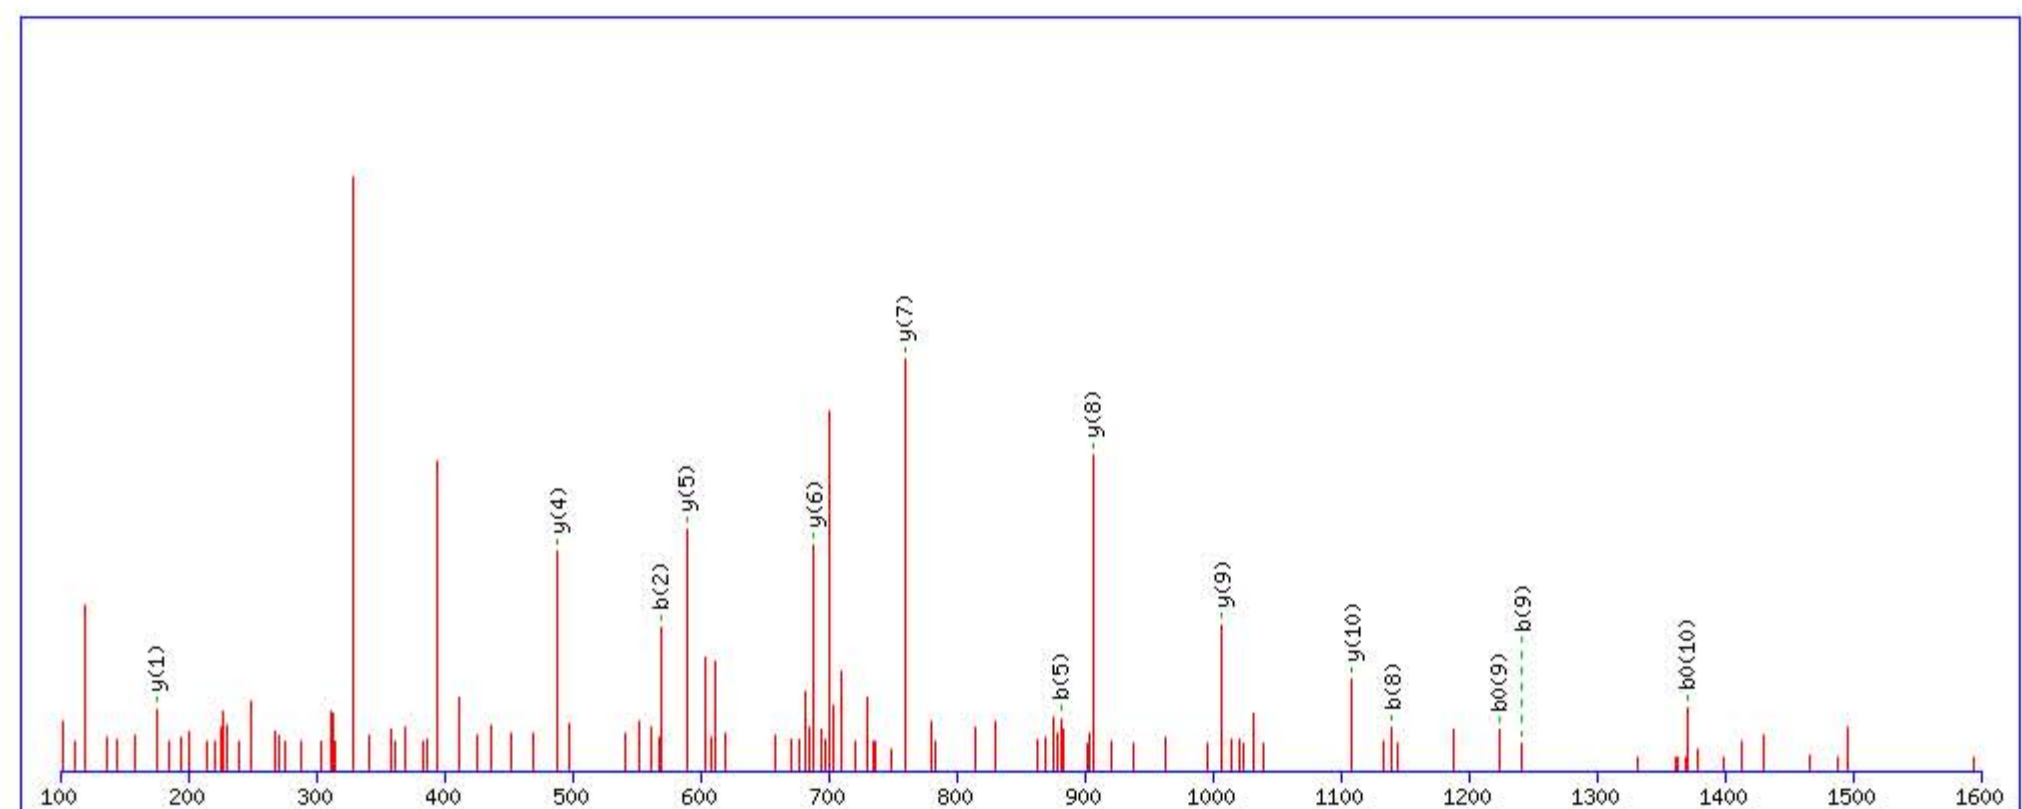

Monoisotopic mass of neutral peptide Mr(calc): 2146.109253

Fixed modifications: Carbamidomethyl (C) (apply to specified residues or termini only)

Variable modifications:

Q1 : Biotin:Thermo-21345 (Q)

Ions Score: 37 Expect: 0.006

Matches : 14/184 fragment ions using 29 most intense peaks [\(help\)](#)

| #  | b                  | b <sup>++</sup> | b <sup>*</sup> | b <sup>*++</sup> | b <sup>0</sup>     | b <sup>0++</sup> | Seq. | y                  | y <sup>++</sup> | y <sup>*</sup> | y <sup>*++</sup> | y <sup>0</sup> | y <sup>0++</sup> | #  |
|----|--------------------|-----------------|----------------|------------------|--------------------|------------------|------|--------------------|-----------------|----------------|------------------|----------------|------------------|----|
| 1  | 440.232602         | 220.619939      | 423.206053     | 212.106664       |                    |                  | Q    |                    |                 |                |                  |                |                  | 17 |
| 2  | <b>569.275195</b>  | 285.141236      | 552.248646     | 276.627961       | 551.264630         | 276.135953       | E    | 1707.891193        | 854.449235      | 1690.864644    | 845.935960       | 1689.880628    | 845.443952       | 16 |
| 3  | 666.327959         | 333.667618      | 649.301410     | 325.154343       | 648.317394         | 324.662335       | P    | 1578.848600        | 789.927938      | 1561.822051    | 781.414664       | 1560.838035    | 780.922656       | 15 |
| 4  | 753.359987         | 377.183632      | 736.333438     | 368.670357       | 735.349422         | 368.178349       | S    | 1481.795836        | 741.401556      | 1464.769287    | 732.888282       | 1463.785271    | 732.396274       | 14 |
| 5  | <b>881.418565</b>  | 441.212921      | 864.392016     | 432.699646       | 863.408000         | 432.207638       | Q    | 1394.763808        | 697.885542      | 1377.737259    | 689.372268       | 1376.753243    | 688.880260       | 13 |
| 6  | 938.440029         | 469.723653      | 921.413480     | 461.210378       | 920.429464         | 460.718370       | G    | 1266.705230        | 633.856253      | 1249.678681    | 625.342979       | 1248.694665    | 624.850971       | 12 |
| 7  | 1039.487708        | 520.247492      | 1022.461159    | 511.734218       | 1021.477143        | 511.242210       | T    | 1209.683766        | 605.345521      | 1192.657217    | 596.832247       | 1191.673201    | 596.340239       | 11 |
| 8  | <b>1140.535387</b> | 570.771332      | 1123.508838    | 562.258057       | 1122.524822        | 561.766049       | T    | <b>1108.636087</b> | 554.821682      | 1091.609538    | 546.308407       | 1090.625522    | 545.816399       | 10 |
| 9  | <b>1241.583066</b> | 621.295171      | 1224.556517    | 612.781897       | <b>1223.572501</b> | 612.289889       | T    | <b>1007.588408</b> | 504.297842      | 990.561859     | 495.784568       | 989.577843     | 495.292560       | 9  |
| 10 | 1388.651480        | 694.829378      | 1371.624931    | 686.316104       | <b>1370.640915</b> | 685.824096       | F    | <b>906.540729</b>  | 453.774003      | 889.514180     | 445.260728       | 888.530164     | 444.768720       | 8  |
| 11 | 1459.688594        | 730.347935      | 1442.662045    | 721.834661       | 1441.678029        | 721.342653       | A    | <b>759.472315</b>  | 380.239796      | 742.445766     | 371.726521       | 741.461750     | 371.234513       | 7  |
| 12 | 1558.757008        | 779.882142      | 1541.730459    | 771.368868       | 1540.746443        | 770.876860       | V    | <b>688.435201</b>  | 344.721239      | 671.408652     | 336.207964       | 670.424636     | 335.715956       | 6  |
| 13 | 1659.804687        | 830.405982      | 1642.778138    | 821.892707       | 1641.794122        | 821.400699       | T    | <b>589.366787</b>  | 295.187032      | 572.340238     | 286.673757       | 571.356222     | 286.181749       | 5  |
| 14 | 1746.836715        | 873.921996      | 1729.810166    | 865.408721       | 1728.826150        | 864.916713       | S    | <b>488.319108</b>  | 244.663192      | 471.292559     | 236.149918       | 470.308543     | 235.657910       | 4  |
| 15 | 1859.920779        | 930.464028      | 1842.894230    | 921.950753       | 1841.910214        | 921.458745       | I    | 401.287080         | 201.147178      | 384.260531     | 192.633903       |                |                  | 3  |
| 16 | 1973.004843        | 987.006060      | 1955.978294    | 978.492785       | 1954.994278        | 978.000777       | L    | 288.203016         | 144.605146      | 271.176467     | 136.091872       |                |                  | 2  |
| 17 |                    |                 |                |                  |                    |                  | R    | <b>175.118952</b>  | 88.063114       | 158.092403     | 79.549840        |                |                  | 1  |

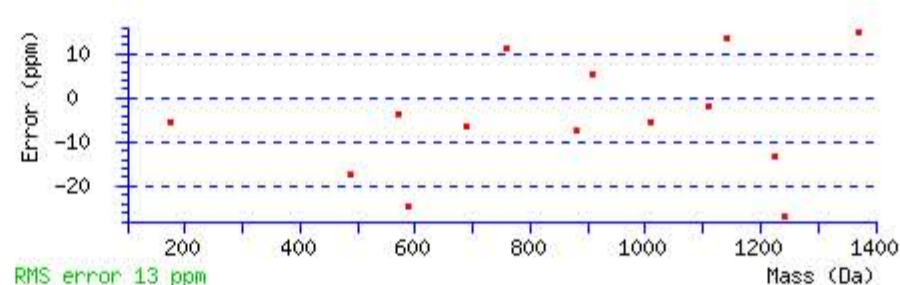

NCBI BLAST search of **QEPSQGTTTFAVTSILR**

(Parameters: blastp, nr protein database, expect=20000, no filter, PAM30)

Other BLAST [web gateways](#)

All matches to this query

| Score | Mr(calc):   | Delta     | Sequence                          |
|-------|-------------|-----------|-----------------------------------|
| 36.7  | 2146.109253 | -0.005811 | <a href="#">QEPSQGTTTFAVTSILR</a> |
| 34.6  | 2146.109253 | -0.005811 | <a href="#">QEPSQGTTTFAVTSILR</a> |

# MASCOT Search Results

## Peptide View

MS/MS Fragmentation of **QEPSQGTTTFAVTSILR**

Found in **IGHA1\_HUMAN**, Ig alpha-1 chain C region OS=Homo sapiens GN=IGHA1 PE=1 SV=2

Match to Query 42253: 2146.106202 from(716.376010,3+) rtinseconds(2503) index(34614)

Title: Locus:1.1.1.3535.18 File:"2013-07-02 CLN FXIII 180 min 3rd F 3.wiff"

Data file C:\Program Files (x86)\Matrix Science\Mascot Daemon\mgf9 FXIII 180 min 3rd\mascot\_daemon\_merge.mgf

Click mouse within plot area to zoom in by factor of two about that point

Or, Plot from  to  Da

Label all possible matches  Label matches used for scoring

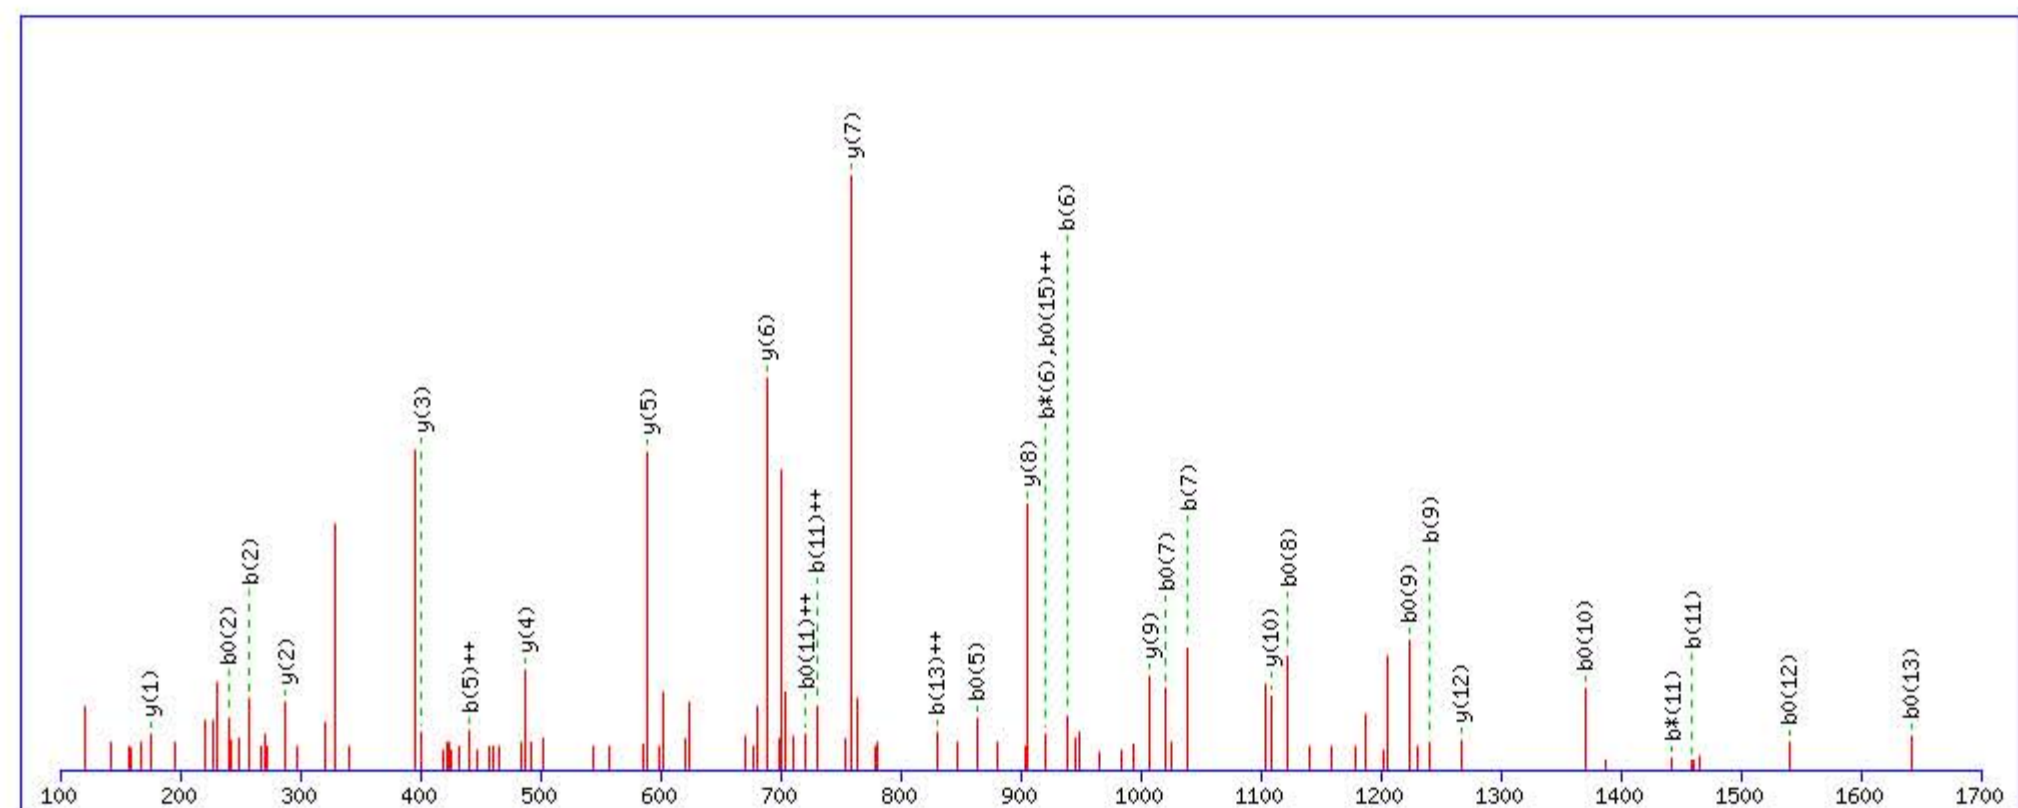

Monoisotopic mass of neutral peptide Mr(calc): 2146.109253

Fixed modifications: Carbamidomethyl (C) (apply to specified residues or termini only)

Variable modifications:

Q5 : Biotin:Thermo-21345 (Q)

Ions Score: 59 Expect: 3.5e-005

Matches : 31/184 fragment ions using 56 most intense peaks ([help](#))

| #  | b                  | b <sup>++</sup>   | b <sup>*</sup>     | b <sup>+++</sup> | b <sup>0</sup>     | b <sup>0++</sup>  | Seq. | y                  | y <sup>++</sup> | y <sup>*</sup> | y <sup>+++</sup> | y <sup>0</sup> | y <sup>0++</sup> | #  |
|----|--------------------|-------------------|--------------------|------------------|--------------------|-------------------|------|--------------------|-----------------|----------------|------------------|----------------|------------------|----|
| 1  | 129.065854         | 65.036565         | 112.039305         | 56.523291        |                    |                   | Q    |                    |                 |                |                  |                |                  | 17 |
| 2  | <b>258.108447</b>  | 129.557862        | 241.081898         | 121.044587       | <b>240.097882</b>  | 120.552579        | E    | 2019.057941        | 1010.032609     | 2002.031392    | 1001.519334      | 2001.047376    | 1001.027326      | 16 |
| 3  | 355.161211         | 178.084244        | 338.134662         | 169.570969       | 337.150646         | 169.078961        | P    | 1890.015348        | 945.511312      | 1872.988799    | 936.998038       | 1872.004783    | 936.506030       | 15 |
| 4  | 442.193239         | 221.600258        | 425.166690         | 213.086983       | 424.182674         | 212.594975        | S    | 1792.962584        | 896.984930      | 1775.936035    | 888.471656       | 1774.952019    | 887.979648       | 14 |
| 5  | 881.418565         | <b>441.212921</b> | 864.392016         | 432.699646       | <b>863.408000</b>  | 432.207638        | Q    | 1705.930556        | 853.468916      | 1688.904007    | 844.955642       | 1687.919991    | 844.463634       | 13 |
| 6  | <b>938.440029</b>  | 469.723653        | <b>921.413480</b>  | 461.210378       | 920.429464         | 460.718370        | G    | <b>1266.705230</b> | 633.856253      | 1249.678681    | 625.342979       | 1248.694665    | 624.850971       | 12 |
| 7  | <b>1039.487708</b> | 520.247492        | 1022.461159        | 511.734218       | <b>1021.477143</b> | 511.242210        | T    | 1209.683766        | 605.345521      | 1192.657217    | 596.832247       | 1191.673201    | 596.340239       | 11 |
| 8  | 1140.535387        | 570.771332        | 1123.508838        | 562.258057       | <b>1122.524822</b> | 561.766049        | T    | <b>1108.636087</b> | 554.821682      | 1091.609538    | 546.308407       | 1090.625522    | 545.816399       | 10 |
| 9  | <b>1241.583066</b> | 621.295171        | 1224.556517        | 612.781897       | <b>1223.572501</b> | 612.289889        | T    | <b>1007.588408</b> | 504.297842      | 990.561859     | 495.784568       | 989.577843     | 495.292560       | 9  |
| 10 | 1388.651480        | 694.829378        | 1371.624931        | 686.316104       | <b>1370.640915</b> | 685.824096        | F    | <b>906.540729</b>  | 453.774003      | 889.514180     | 445.260728       | 888.530164     | 444.768720       | 8  |
| 11 | <b>1459.688594</b> | <b>730.347935</b> | <b>1442.662045</b> | 721.834661       | 1441.678029        | <b>721.342653</b> | A    | <b>759.472315</b>  | 380.239796      | 742.445766     | 371.726521       | 741.461750     | 371.234513       | 7  |
| 12 | 1558.757008        | 779.882142        | 1541.730459        | 771.368868       | <b>1540.746443</b> | 770.876860        | V    | <b>688.435201</b>  | 344.721239      | 671.408652     | 336.207964       | 670.424636     | 335.715956       | 6  |
| 13 | 1659.804687        | <b>830.405982</b> | 1642.778138        | 821.892707       | <b>1641.794122</b> | 821.400699        | T    | <b>589.366787</b>  | 295.187032      | 572.340238     | 286.673757       | 571.356222     | 286.181749       | 5  |
| 14 | 1746.836715        | 873.921996        | 1729.810166        | 865.408721       | 1728.826150        | 864.916713        | S    | <b>488.319108</b>  | 244.663192      | 471.292559     | 236.149918       | 470.308543     | 235.657910       | 4  |
| 15 | 1859.920779        | 930.464028        | 1842.894230        | 921.950753       | 1841.910214        | <b>921.458745</b> | I    | <b>401.287080</b>  | 201.147178      | 384.260531     | 192.633903       |                |                  | 3  |
| 16 | 1973.004843        | 987.006060        | 1955.978294        | 978.492785       | 1954.994278        | 978.000777        | L    | <b>288.203016</b>  | 144.605146      | 271.176467     | 136.091872       |                |                  | 2  |
| 17 |                    |                   |                    |                  |                    |                   | R    | <b>175.118952</b>  | 88.063114       | 158.092403     | 79.549840        |                |                  | 1  |

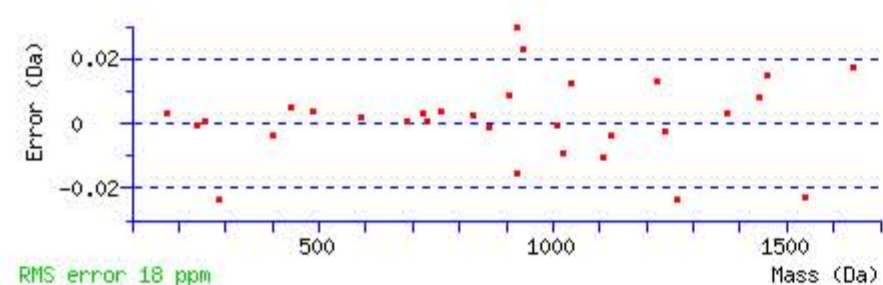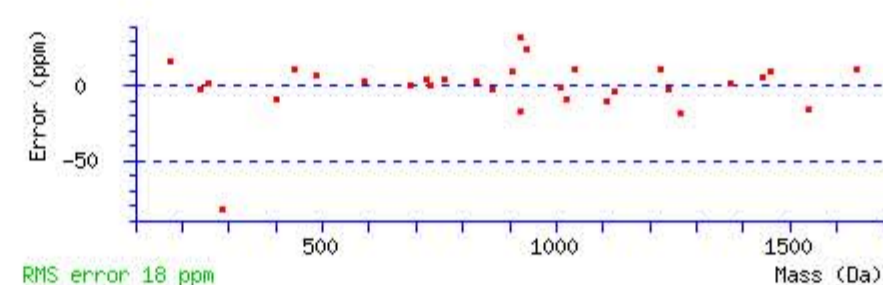

NCBI BLAST search of **QEPSQGTTTFAVTSILR**

(Parameters: blastp, nr protein database, expect=20000, no filter, PAM30)

Other BLAST [web gateways](#)

All matches to this query

| Score | Mr(calc):   | Delta     | Sequence                          |
|-------|-------------|-----------|-----------------------------------|
| 59.1  | 2146.109253 | -0.003051 | <a href="#">QEPSQGTTTFAVTSILR</a> |
| 56.2  | 2146.109253 | -0.003051 | <a href="#">QEPSQGTTTFAVTSILR</a> |

Mascot: <http://www.matrixscience.com/>

**Mascot Search Results**

**Peptide View**

MS/MS Fragmentation of **GDTFSCMVGHEALPLAFTQK**

Found in **IGHA1\_HUMAN**, Ig alpha-1 chain C region OS=Homo sapiens GN=IGHA1 PE=1 SV=2

Match to Query 48765: 2519.197392 from(840.739740,3+) rtinseconds(2568) index(34971)

Title: Locus:1.1.1.3557.7 File:"2013-07-02 CLN FXIII 180 min 3rd F 3.wiff"

Data file C:\Program Files (x86)\Matrix Science\Mascot Daemon\mgf9 FXIII 180 min 3rd\mascot\_daemon\_merge.mgf

Click mouse within plot area to zoom in by factor of two about that point

Or, Plot from  to  Da

Label all possible matches  Label matches used for scoring

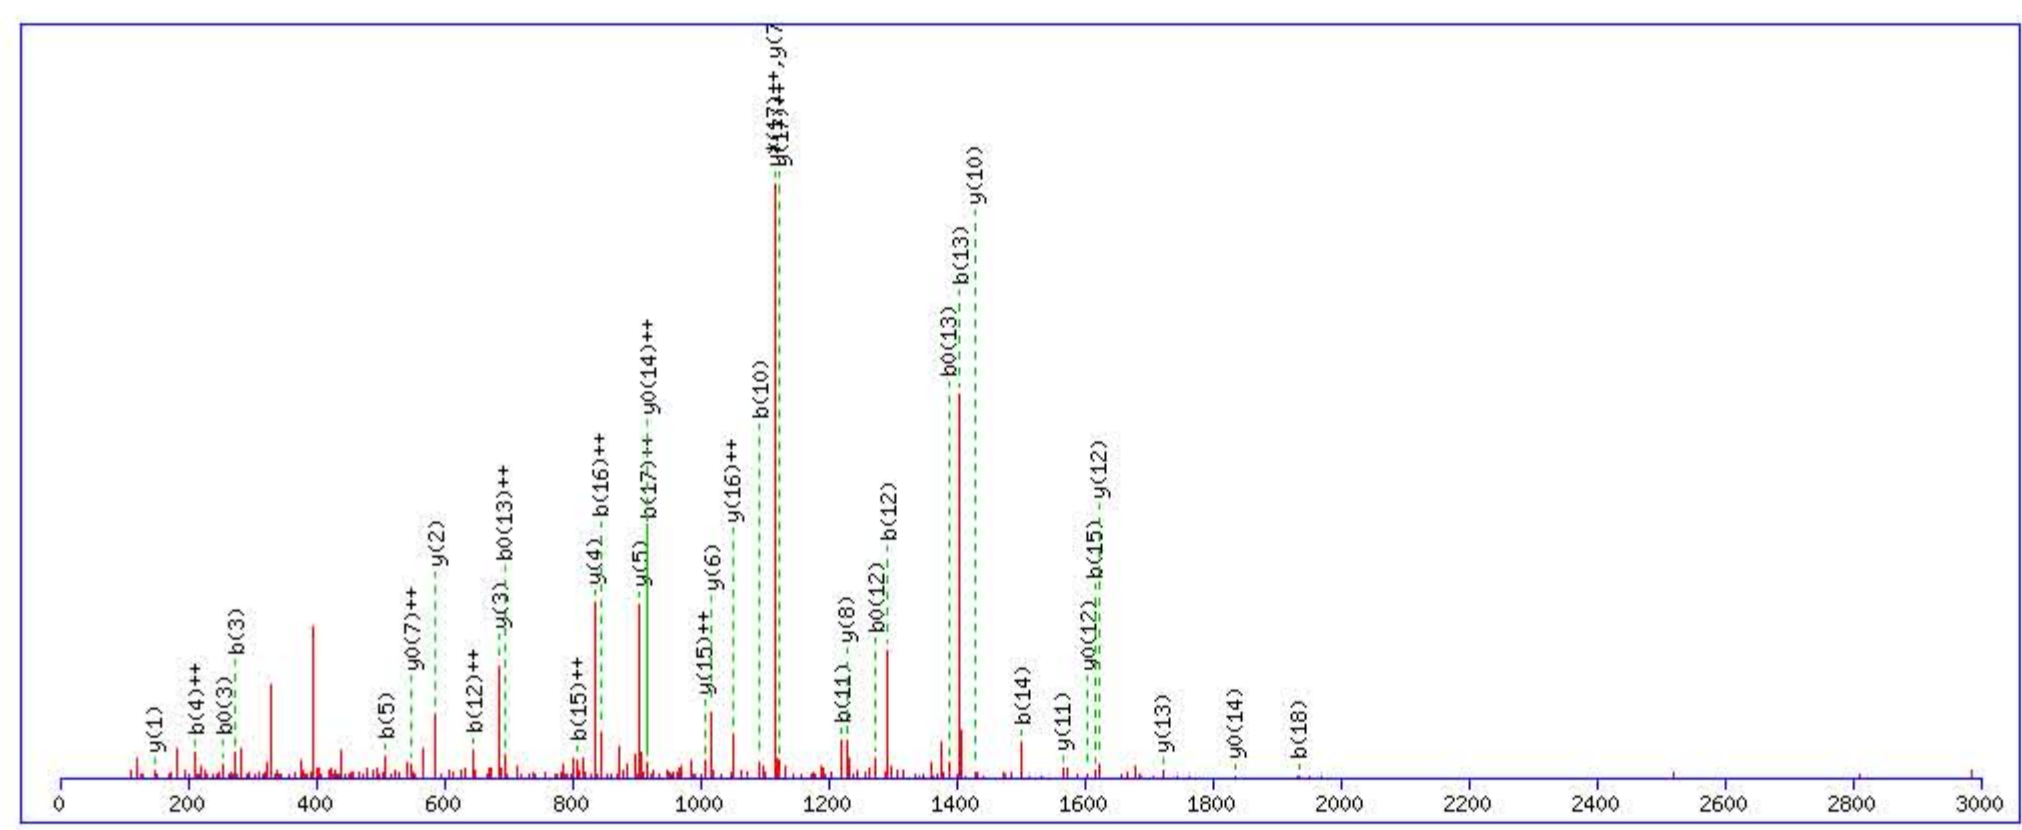

Monoisotopic mass of neutral peptide Mr(calc): 2519.201126

Fixed modifications: Carbamidomethyl (C) (apply to specified residues or termini only)

Variable modifications:

Q19 : Biotin:Thermo-21345 (Q)

Ions Score: 62 Expect: 2e-006

Matches : 38/186 fragment ions using 72 most intense peaks [\(help\)](#)

| #  | b                  | b <sup>++</sup>   | b <sup>*</sup> | b <sup>*++</sup> | b <sup>0</sup>     | b <sup>0++</sup>  | Seq. | y                  | y <sup>++</sup>    | y <sup>*</sup> | y <sup>*++</sup>   | y <sup>0</sup>     | y <sup>0++</sup>  | #  |
|----|--------------------|-------------------|----------------|------------------|--------------------|-------------------|------|--------------------|--------------------|----------------|--------------------|--------------------|-------------------|----|
| 1  | 58.028740          | 29.518008         |                |                  |                    |                   | G    |                    |                    |                |                    |                    |                   | 20 |
| 2  | 173.055683         | 87.031479         |                |                  | 155.045118         | 78.026197         | D    | 2463.186924        | 1232.097100        | 2446.160375    | 1223.583825        | 2445.176359        | 1223.091817       | 19 |
| 3  | <b>274.103362</b>  | 137.555319        |                |                  | <b>256.092797</b>  | 128.550037        | T    | 2348.159981        | 1174.583628        | 2331.133432    | 1166.070354        | 2330.149416        | 1165.578346       | 18 |
| 4  | 421.171776         | <b>211.089526</b> |                |                  | 403.161211         | 202.084243        | F    | 2247.112302        | <b>1124.059789</b> | 2230.085753    | <b>1115.546514</b> | 2229.101737        | 1115.054506       | 17 |
| 5  | <b>508.203804</b>  | 254.605540        |                |                  | 490.193239         | 245.600257        | S    | 2100.043888        | <b>1050.525582</b> | 2083.017339    | 1042.012307        | 2082.033323        | 1041.520299       | 16 |
| 6  | 668.234453         | 334.620865        |                |                  | 650.223888         | 325.615582        | C    | 2013.011860        | <b>1007.009568</b> | 1995.985311    | 998.496294         | 1995.001295        | 998.004286        | 15 |
| 7  | 799.274938         | 400.141107        |                |                  | 781.264373         | 391.135825        | M    | 1852.981211        | 926.994244         | 1835.954662    | 918.480969         | <b>1834.970646</b> | <b>917.988961</b> | 14 |
| 8  | 898.343352         | 449.675314        |                |                  | 880.332787         | 440.670031        | V    | <b>1721.940726</b> | 861.474001         | 1704.914177    | 852.960727         | 1703.930161        | 852.468719        | 13 |
| 9  | 955.364816         | 478.186046        |                |                  | 937.354251         | 469.180764        | G    | <b>1622.872312</b> | 811.939794         | 1605.845763    | 803.426520         | <b>1604.861747</b> | 802.934512        | 12 |
| 10 | <b>1092.423728</b> | 546.715502        |                |                  | 1074.413163        | 537.710219        | H    | <b>1565.850848</b> | 783.429062         | 1548.824299    | 774.915788         | 1547.840283        | 774.423780        | 11 |
| 11 | <b>1221.466321</b> | 611.236799        |                |                  | 1203.455756        | 602.231516        | E    | <b>1428.791936</b> | 714.899606         | 1411.765387    | 706.386332         | 1410.781371        | 705.894324        | 10 |
| 12 | <b>1292.503435</b> | <b>646.755356</b> |                |                  | <b>1274.492870</b> | 637.750073        | A    | 1299.749343        | 650.378310         | 1282.722794    | 641.865035         | 1281.738778        | 641.373027        | 9  |
| 13 | <b>1405.587499</b> | 703.297388        |                |                  | <b>1387.576934</b> | <b>694.292105</b> | L    | <b>1228.712229</b> | 614.859753         | 1211.685680    | 606.346478         | 1210.701664        | 605.854470        | 8  |
| 14 | <b>1502.640263</b> | 751.823770        |                |                  | 1484.629698        | 742.818487        | P    | <b>1115.628165</b> | 558.317721         | 1098.601616    | 549.804446         | 1097.617600        | <b>549.312438</b> | 7  |
| 15 | <b>1615.724327</b> | <b>808.365801</b> |                |                  | 1597.713762        | 799.360519        | L    | <b>1018.575401</b> | 509.791339         | 1001.548852    | 501.278064         | 1000.564836        | 500.786056        | 6  |
| 16 | 1686.761441        | <b>843.884358</b> |                |                  | 1668.750876        | 834.879076        | A    | <b>905.491337</b>  | 453.249307         | 888.464788     | 444.736032         | 887.480772         | 444.244024        | 5  |
| 17 | 1833.829855        | <b>917.418566</b> |                |                  | 1815.819290        | 908.413283        | F    | <b>834.454223</b>  | 417.730750         | 817.427674     | 409.217475         | 816.443658         | 408.725467        | 4  |
| 18 | <b>1934.877534</b> | 967.942405        |                |                  | 1916.866969        | 958.937122        | T    | <b>687.385809</b>  | 344.196543         | 670.359260     | 335.683268         | 669.375244         | 335.191260        | 3  |
| 19 | 2374.102860        | 1187.555068       | 2357.076311    | 1179.041793      | 2356.092295        | 1178.549785       | Q    | <b>586.338130</b>  | 293.672703         | 569.311581     | 285.159429         |                    |                   | 2  |
| 20 |                    |                   |                |                  |                    |                   | K    | <b>147.112804</b>  | 74.060040          | 130.086255     | 65.546765          |                    |                   | 1  |

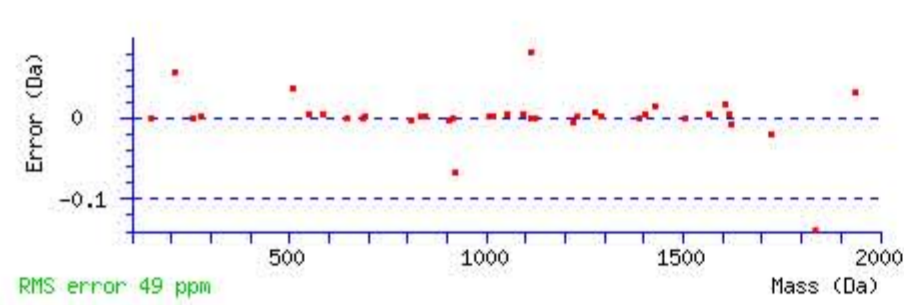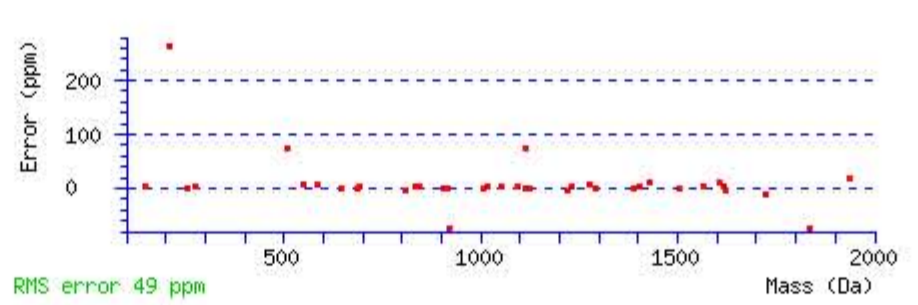

NCBI BLAST search of [GDTFSCMVGHEALPLAFTQK](#)  
(Parameters: blastp, nr protein database, expect=20000, no filter, PAM30)

Other BLAST [web gateways](#)

**All matches to this query**

| Score | Mr(calc):   | Delta     | Sequence                                |
|-------|-------------|-----------|-----------------------------------------|
| 61.6  | 2519.201126 | -0.003734 | <a href="#">GDTFSCMVGHEALPLAFTQK</a>    |
| 0.9   | 2519.214783 | -0.017391 | <a href="#">KMQQENMKPQEQLTLEPYER</a>    |
| 0.2   | 2519.196243 | 0.001149  | <a href="#">EGSPHDNPTVQQIVQLSPVMQDT</a> |

# {MATRIX} {SCIENCE} Mascot Search Results

## Peptide View

MS/MS Fragmentation of **HYTNPSQDVTVPCPVPPPPPCCHPR**  
 Found in **IGHA2\_HUMAN**, Ig alpha-2 chain C region OS=Homo sapiens GN=IGHA2 PE=1 SV=3

Match to Query 56325: 3219.465896 from(805.873750,4+) rtinseconds(1836) index(17931)  
 Title: Locus:1.1.1.3205.8 File:"2013-07-02 CLN FXIII 180 min 3rd F 2.wiff"  
 Data file C:\Program Files (x86)\Matrix Science\Mascot Daemon\mgf9 FXIII 180 min 3rd\mascot\_daemon\_merge.mgf

Click mouse within plot area to zoom in by factor of two about that point

Or, Plot from  to  Da

Label all possible matches  Label matches used for scoring

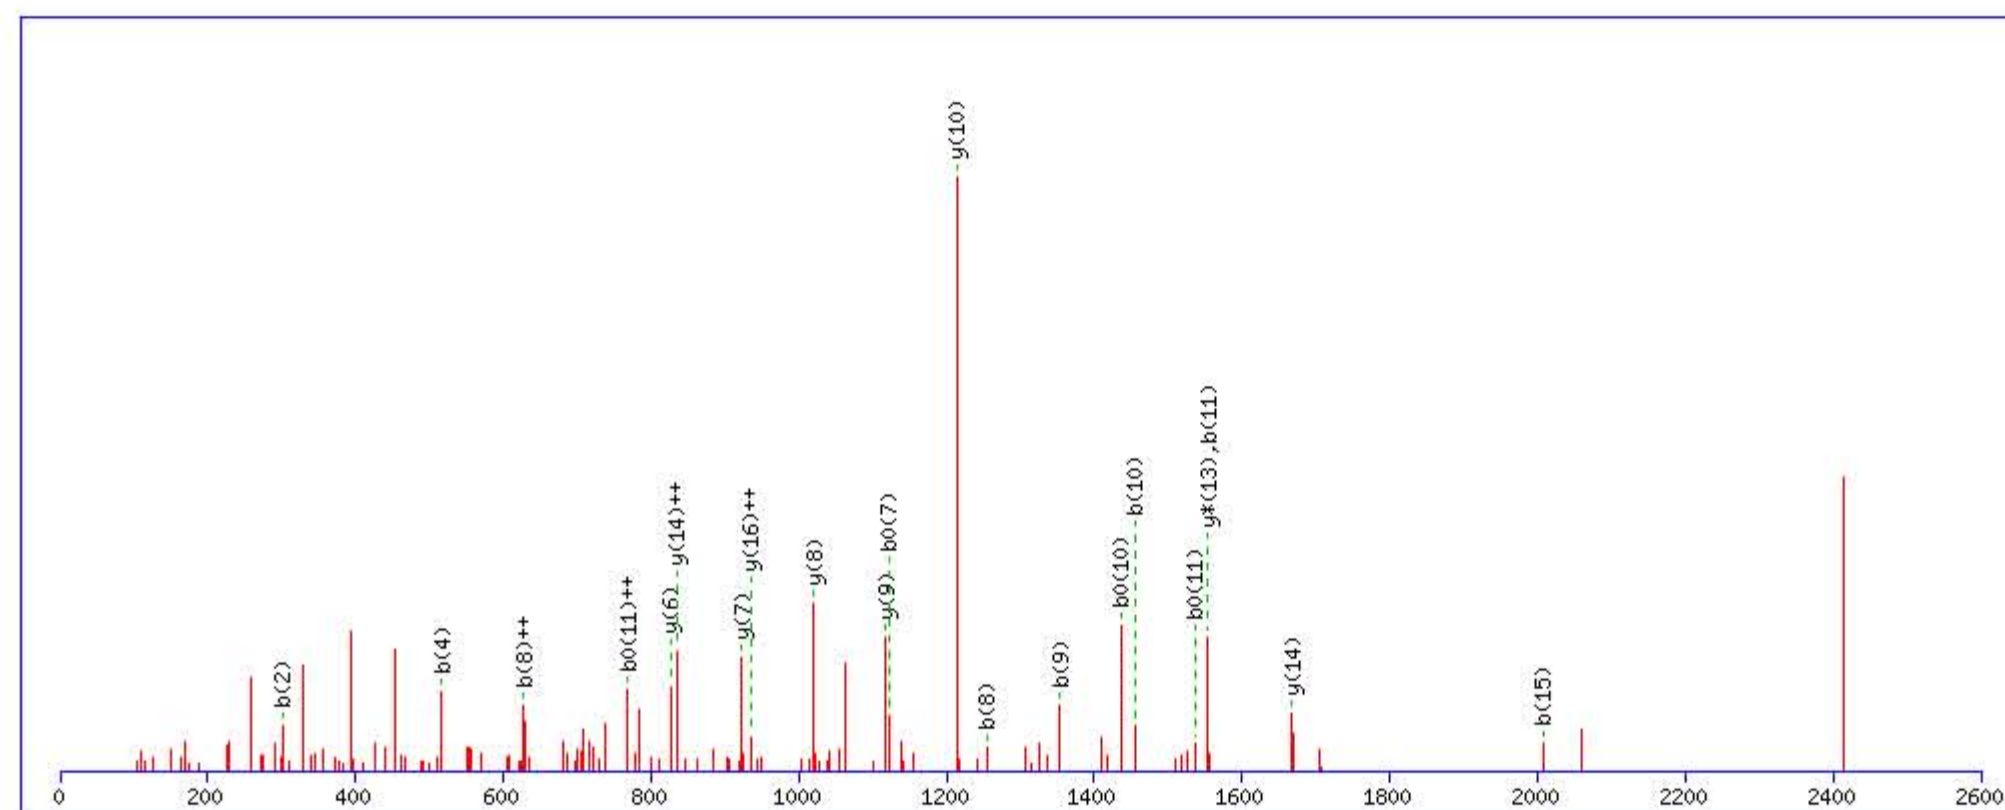

Monoisotopic mass of neutral peptide Mr(calc): 3219.487518  
 Fixed modifications: Carbamidomethyl (C) (apply to specified residues or termini only)  
 Variable modifications:  
 Q7 : Biotin:Thermo-21345 (Q)  
 Ions Score: 33 Expect: 0.0049  
 Matches : 21/248 fragment ions using 37 most intense peaks [\(help\)](#)

| #  | b                  | b <sup>++</sup>   | b <sup>+</sup> | b <sup>+++</sup> | b <sup>0</sup>     | b <sup>0++</sup>  | Seq. | y                  | y <sup>++</sup>   | y <sup>+</sup>     | y <sup>+++</sup> | y <sup>0</sup> | y <sup>0++</sup> | #  |
|----|--------------------|-------------------|----------------|------------------|--------------------|-------------------|------|--------------------|-------------------|--------------------|------------------|----------------|------------------|----|
| 1  | 138.066188         | 69.536732         |                |                  |                    |                   | H    |                    |                   |                    |                  |                |                  | 25 |
| 2  | <b>301.129517</b>  | 151.068397        |                |                  |                    |                   | Y    | 3083.435840        | 1542.221558       | 3066.409291        | 1533.708283      | 3065.425275    | 1533.216275      | 24 |
| 3  | 402.177196         | 201.592236        |                |                  | 384.166631         | 192.586954        | T    | 2920.372511        | 1460.689893       | 2903.345962        | 1452.176619      | 2902.361946    | 1451.684611      | 23 |
| 4  | <b>516.220123</b>  | 258.613700        | 499.193574     | 250.100425       | 498.209558         | 249.608417        | N    | 2819.324832        | 1410.166054       | 2802.298283        | 1401.652779      | 2801.314267    | 1401.160771      | 22 |
| 5  | 613.272887         | 307.140082        | 596.246338     | 298.626807       | 595.262322         | 298.134799        | P    | 2705.281905        | 1353.144590       | 2688.255356        | 1344.631316      | 2687.271340    | 1344.139308      | 21 |
| 6  | 700.304915         | 350.656096        | 683.278366     | 342.142821       | 682.294350         | 341.650813        | S    | 2608.229141        | 1304.618208       | 2591.202592        | 1296.104934      | 2590.218576    | 1295.612926      | 20 |
| 7  | 1139.530241        | 570.268759        | 1122.503692    | 561.755484       | <b>1121.519676</b> | 561.263476        | Q    | 2521.197113        | 1261.102194       | 2504.170564        | 1252.588920      | 2503.186548    | 1252.096912      | 19 |
| 8  | <b>1254.557184</b> | <b>627.782230</b> | 1237.530635    | 619.268956       | 1236.546619        | 618.776948        | D    | 2081.971787        | 1041.489531       | 2064.945238        | 1032.976257      | 2063.961222    | 1032.484249      | 18 |
| 9  | <b>1353.625598</b> | 677.316437        | 1336.599049    | 668.803163       | 1335.615033        | 668.311155        | V    | 1966.944844        | 983.976060        | 1949.918295        | 975.462786       | 1948.934279    | 974.970778       | 17 |
| 10 | <b>1454.673277</b> | 727.840277        | 1437.646728    | 719.327002       | <b>1436.662712</b> | 718.834994        | T    | 1867.876430        | <b>934.441853</b> | 1850.849881        | 925.928579       | 1849.865865    | 925.436571       | 16 |
| 11 | <b>1553.741691</b> | 777.374484        | 1536.715142    | 768.861209       | <b>1535.731126</b> | <b>768.369201</b> | V    | 1766.828751        | 883.918014        | 1749.802202        | 875.404739       |                |                  | 15 |
| 12 | 1650.794455        | 825.900866        | 1633.767906    | 817.387591       | 1632.783890        | 816.895583        | P    | <b>1667.760337</b> | <b>834.383806</b> | 1650.733788        | 825.870532       |                |                  | 14 |
| 13 | 1810.825104        | 905.916190        | 1793.798555    | 897.402916       | 1792.814539        | 896.910908        | C    | 1570.707573        | 785.857424        | <b>1553.681024</b> | 777.344150       |                |                  | 13 |
| 14 | 1907.877868        | 954.442572        | 1890.851319    | 945.929298       | 1889.867303        | 945.437290        | P    | 1410.676924        | 705.842100        | 1393.650375        | 697.328825       |                |                  | 12 |
| 15 | <b>2006.946282</b> | 1003.976779       | 1989.919733    | 995.463505       | 1988.935717        | 994.971497        | V    | 1313.624160        | 657.315718        | 1296.597611        | 648.802443       |                |                  | 11 |
| 16 | 2103.999046        | 1052.503161       | 2086.972497    | 1043.989887      | 2085.988481        | 1043.497879       | P    | <b>1214.555746</b> | 607.781511        | 1197.529197        | 599.268236       |                |                  | 10 |
| 17 | 2201.051810        | 1101.029543       | 2184.025261    | 1092.516269      | 2183.041245        | 1092.024261       | P    | <b>1117.502982</b> | 559.255129        | 1100.476433        | 550.741854       |                |                  | 9  |
| 18 | 2298.104574        | 1149.555925       | 2281.078025    | 1141.042651      | 2280.094009        | 1140.550643       | P    | <b>1020.450218</b> | 510.728747        | 1003.423669        | 502.215472       |                |                  | 8  |
| 19 | 2395.157338        | 1198.082307       | 2378.130789    | 1189.569033      | 2377.146773        | 1189.077025       | P    | <b>923.397454</b>  | 462.202365        | 906.370905         | 453.689090       |                |                  | 7  |
| 20 | 2492.210102        | 1246.608689       | 2475.183553    | 1238.095415      | 2474.199537        | 1237.603407       | P    | <b>826.344690</b>  | 413.675983        | 809.318141         | 405.162708       |                |                  | 6  |
| 21 | 2652.240751        | 1326.624014       | 2635.214202    | 1318.110739      | 2634.230186        | 1317.618731       | C    | 729.291926         | 365.149601        | 712.265377         | 356.636326       |                |                  | 5  |
| 22 | 2812.271400        | 1406.639338       | 2795.244851    | 1398.126063      | 2794.260835        | 1397.634055       | C    | 569.261277         | 285.134276        | 552.234728         | 276.621002       |                |                  | 4  |
| 23 | 2949.330312        | 1475.168794       | 2932.303763    | 1466.655519      | 2931.319747        | 1466.163511       | H    | 409.230628         | 205.118952        | 392.204079         | 196.605677       |                |                  | 3  |
| 24 | 3046.383076        | 1523.695176       | 3029.356527    | 1515.181901      | 3028.372511        | 1514.689893       | P    | 272.171716         | 136.589496        | 255.145167         | 128.076221       |                |                  | 2  |
| 25 |                    |                   |                |                  |                    |                   | R    | 175.118952         | 88.063114         | 158.092403         | 79.549839        |                |                  | 1  |

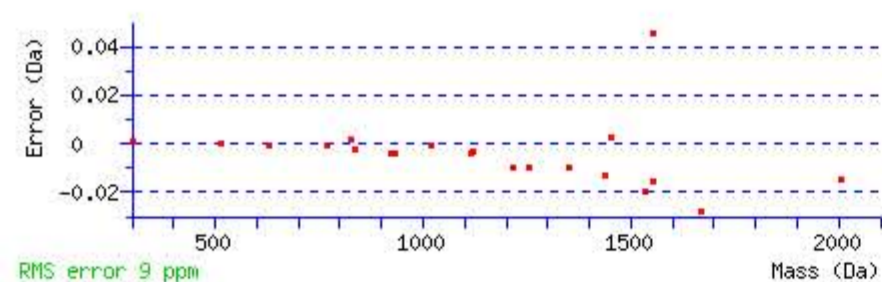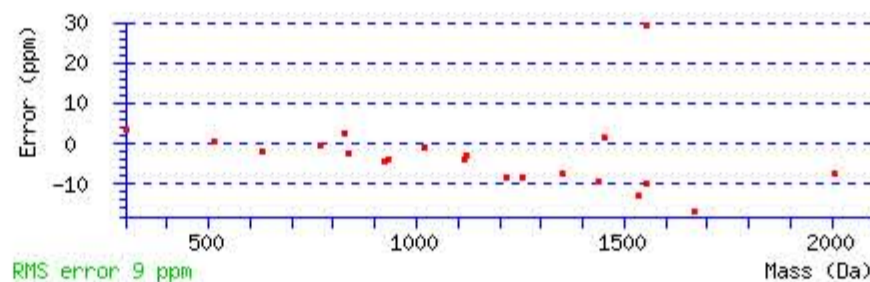

NCBI BLAST search of **HYTNPSQDVTVPCPVPPPPPCCHPR**  
 (Parameters: blastp, nr protein database, expect=20000, no filter, PAM30)  
 Other BLAST [web gateways](#)

## All matches to this query

| Score | Mr(calc):   | Delta     | Sequence                                  |
|-------|-------------|-----------|-------------------------------------------|
| 33.4  | 3219.487518 | -0.021622 | <a href="#">HYTNPSQDVTVPCPVPPPPPCCHPR</a> |

# **MASCOT** Mascot Search Results

## Peptide View

MS/MS Fragmentation of **TFPEIQR**

Found in **IGHD\_HUMAN**, Ig delta chain C region OS=Homo sapiens GN=IGHD PE=1 SV=2

Match to Query 17764: 1200.631168 from(601.322860,2+) rtinseconds(1967) index(60398)

Title: Locus:1.1.1.1596.18 File:"2013-07-02 CLN FXIII 180 min 3rd FT.wiff"

Data file C:\Program Files (x86)\Matrix Science\Mascot Daemon\mgf9 FXIII 180 min 3rd\mascot\_daemon\_merge.mgf

Click mouse within plot area to zoom in by factor of two about that point

Or, Plot from  to  Da

Label all possible matches  Label matches used for scoring

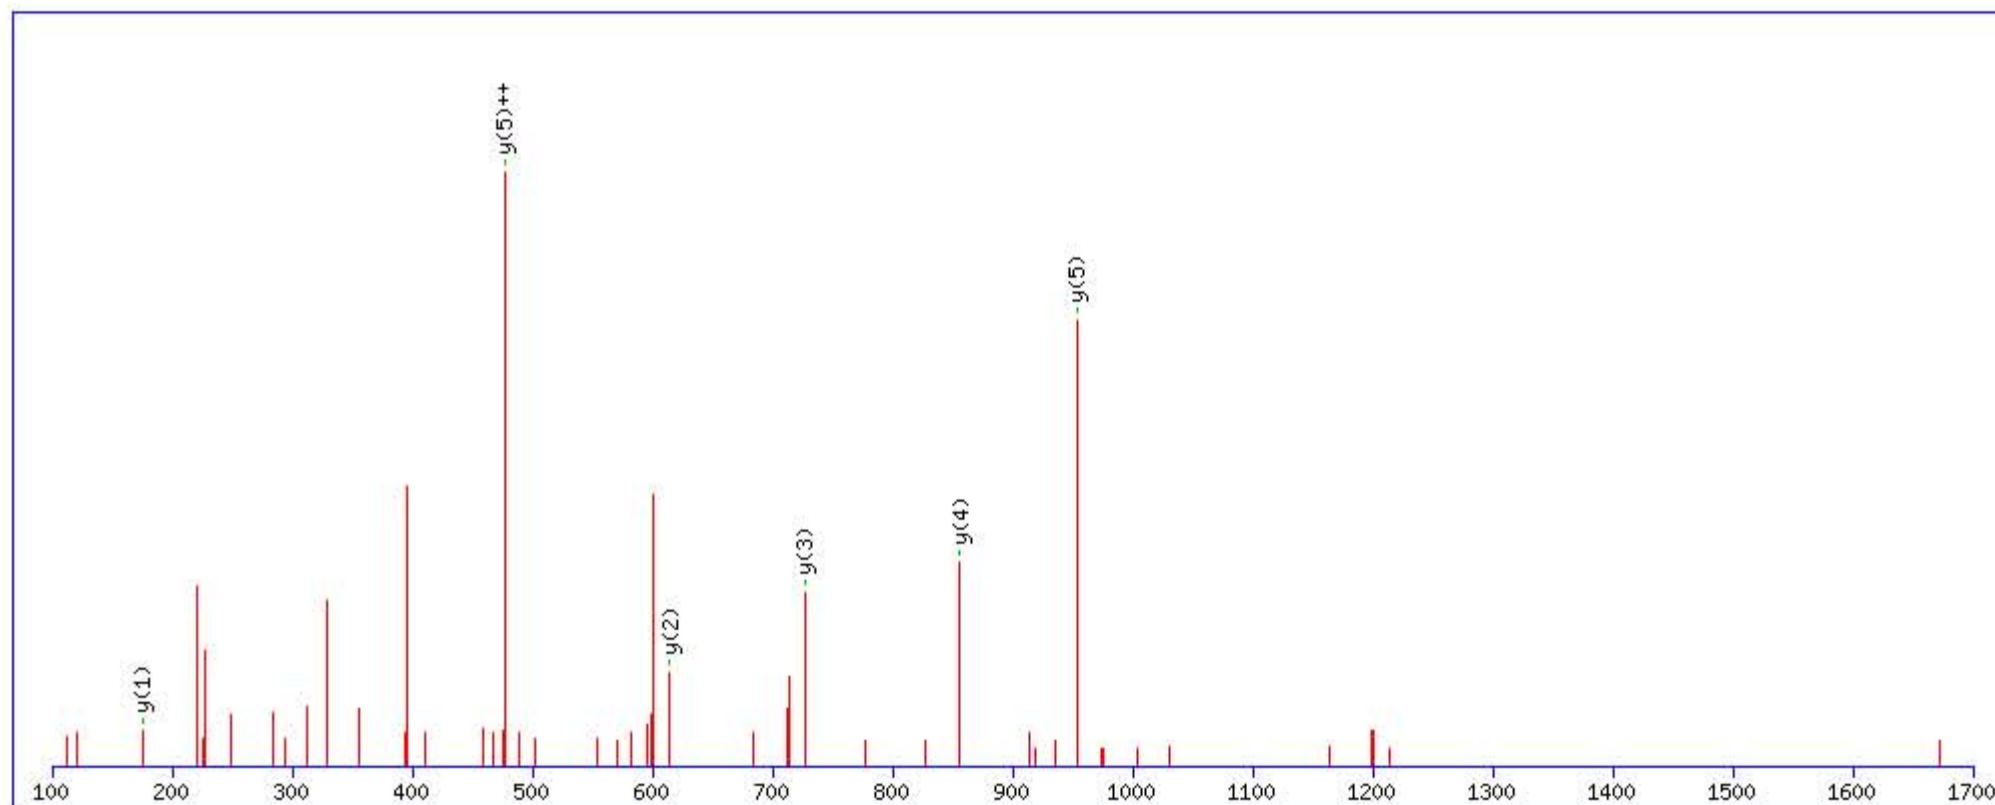

Monoisotopic mass of neutral peptide Mr(calc): 1200.632507

Fixed modifications: Carbamidomethyl (C) (apply to specified residues or termini only)

Variable modifications:

Q6 : Biotin:Thermo-21345 (Q)

Ions Score: 31 Expect: 0.0053

Matches : 6/56 fragment ions using 11 most intense peaks [\(help\)](#)

| # | b           | b <sup>++</sup> | b <sup>*</sup> | b <sup>*++</sup> | b <sup>0</sup> | b <sup>0++</sup> | Seq. | y           | y <sup>++</sup> | y <sup>*</sup> | y <sup>*++</sup> | y <sup>0</sup> | y <sup>0++</sup> | # |
|---|-------------|-----------------|----------------|------------------|----------------|------------------|------|-------------|-----------------|----------------|------------------|----------------|------------------|---|
| 1 | 102.054955  | 51.531116       |                |                  | 84.044390      | 42.525833        | T    |             |                 |                |                  |                |                  | 7 |
| 2 | 249.123369  | 125.065322      |                |                  | 231.112804     | 116.060040       | F    | 1100.592113 | 550.799695      | 1083.565564    | 542.286420       | 1082.581548    | 541.794412       | 6 |
| 3 | 346.176133  | 173.591704      |                |                  | 328.165568     | 164.586422       | P    | 953.523699  | 477.265488      | 936.497150     | 468.752213       | 935.513134     | 468.260205       | 5 |
| 4 | 475.218726  | 238.113001      |                |                  | 457.208161     | 229.107719       | E    | 856.470935  | 428.739106      | 839.444386     | 420.225831       | 838.460370     | 419.733823       | 4 |
| 5 | 588.302790  | 294.655033      |                |                  | 570.292225     | 285.649751       | I    | 727.428342  | 364.217809      | 710.401793     | 355.704535       |                |                  | 3 |
| 6 | 1027.528116 | 514.267696      | 1010.501567    | 505.754422       | 1009.517551    | 505.262414       | Q    | 614.344278  | 307.675777      | 597.317729     | 299.162503       |                |                  | 2 |
| 7 |             |                 |                |                  |                |                  | R    | 175.118952  | 88.063114       | 158.092403     | 79.549839        |                |                  | 1 |

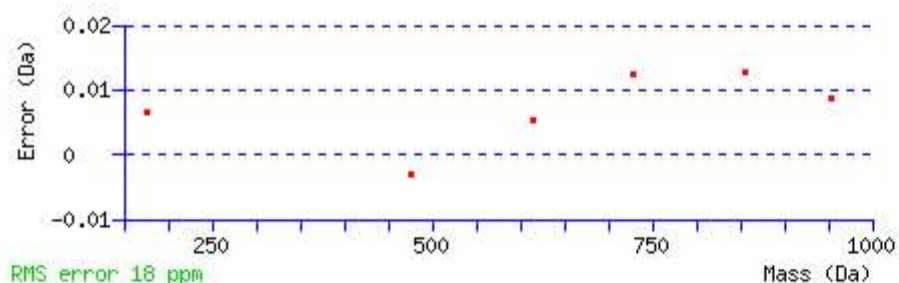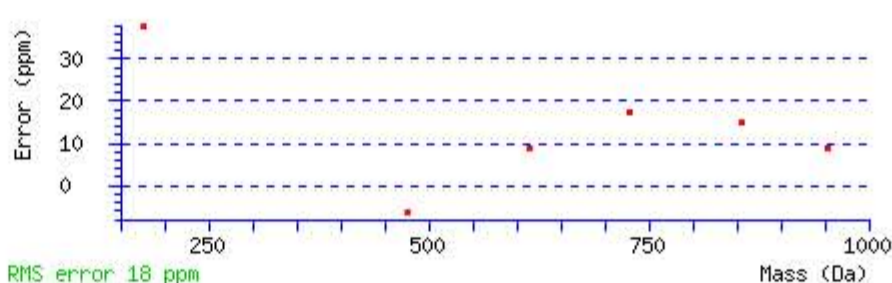

NCBI BLAST search of **TFPEIQR**

(Parameters: blastp, nr protein database, expect=20000, no filter, PAM30)

Other BLAST [web gateways](#)

## All matches to this query

| Score | Mr(calc):   | Delta     | Sequence                   |
|-------|-------------|-----------|----------------------------|
| 31.1  | 1200.632507 | -0.001339 | <a href="#">TFPEIQR</a>    |
| 6.4   | 1200.628464 | 0.002704  | <a href="#">LLQLQEMGNR</a> |
| 0.2   | 1200.636353 | -0.005185 | <a href="#">TFTQKGNLHR</a> |

# **MASCOT** Mascot Search Results

## Peptide View

MS/MS Fragmentation of **EPAAQAPVK**

Found in **IGHD\_HUMAN**, Ig delta chain C region OS=Homo sapiens GN=IGHD PE=1 SV=2

Match to Query 18169: 1220.656608 from(611.335580,2+) rtinseconds(1478) index(15719)

Title: Locus:1.1.1.3080.8 File:"2013-07-02 CLN FXIII 180 min 3rd F 2.wiff"

Data file C:\Program Files (x86)\Matrix Science\Mascot Daemon\mgf9 FXIII 180 min 3rd\mascot\_daemon\_merge.mgf

Click mouse within plot area to zoom in by factor of two about that point

Or, Plot from  to  Da

Label all possible matches  Label matches used for scoring

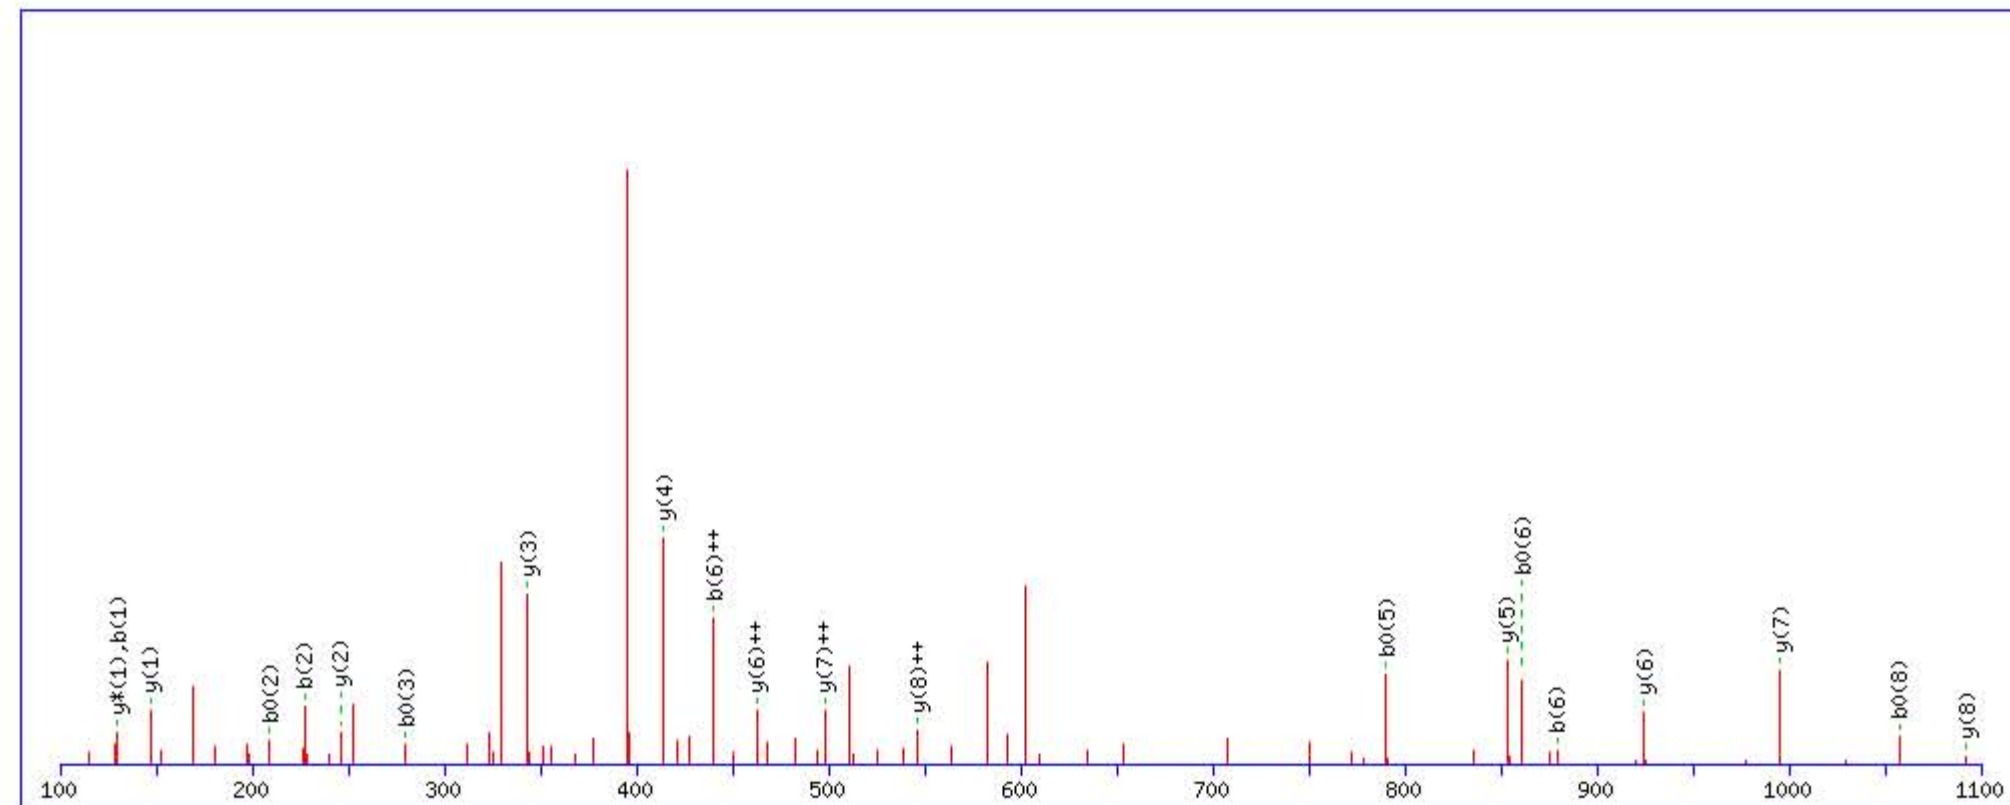

Monoisotopic mass of neutral peptide  $M_r(\text{calc})$ : 1220.658707

Fixed modifications: Carbamidomethyl (C) (apply to specified residues or termini only)

Variable modifications:

Q5 : Biotin:Thermo-21345 (Q)

Ions Score: 52 Expect: 0.00012

Matches : 21/72 fragment ions using 38 most intense peaks [\(help\)](#)

| # | b           | b <sup>++</sup> | b <sup>*</sup> | b <sup>+++</sup> | b <sup>0</sup> | b <sup>0++</sup> | Seq. | y           | y <sup>++</sup> | y <sup>*</sup> | y <sup>+++</sup> | # |
|---|-------------|-----------------|----------------|------------------|----------------|------------------|------|-------------|-----------------|----------------|------------------|---|
| 1 | 130.049869  | 65.528572       |                |                  | 112.039304     | 56.523290        | E    |             |                 |                |                  | 9 |
| 2 | 227.102633  | 114.054954      |                |                  | 209.092068     | 105.049672       | P    | 1092.623414 | 546.815345      | 1075.596865    | 538.302071       | 8 |
| 3 | 298.139747  | 149.573512      |                |                  | 280.129182     | 140.568229       | A    | 995.570650  | 498.288963      | 978.544101     | 489.775689       | 7 |
| 4 | 369.176861  | 185.092068      |                |                  | 351.166296     | 176.086786       | A    | 924.533536  | 462.770406      | 907.506987     | 454.257132       | 6 |
| 5 | 808.402187  | 404.704732      | 791.375638     | 396.191457       | 790.391622     | 395.699449       | Q    | 853.496422  | 427.251849      | 836.469873     | 418.738575       | 5 |
| 6 | 879.439301  | 440.223289      | 862.412752     | 431.710014       | 861.428736     | 431.218006       | A    | 414.271096  | 207.639186      | 397.244547     | 199.125911       | 4 |
| 7 | 976.492065  | 488.749671      | 959.465516     | 480.236396       | 958.481500     | 479.744388       | P    | 343.233982  | 172.120629      | 326.207433     | 163.607354       | 3 |
| 8 | 1075.560479 | 538.283878      | 1058.533930    | 529.770603       | 1057.549914    | 529.278595       | V    | 246.181218  | 123.594247      | 229.154669     | 115.080972       | 2 |
| 9 |             |                 |                |                  |                |                  | K    | 147.112804  | 74.060040       | 130.086255     | 65.546765        | 1 |

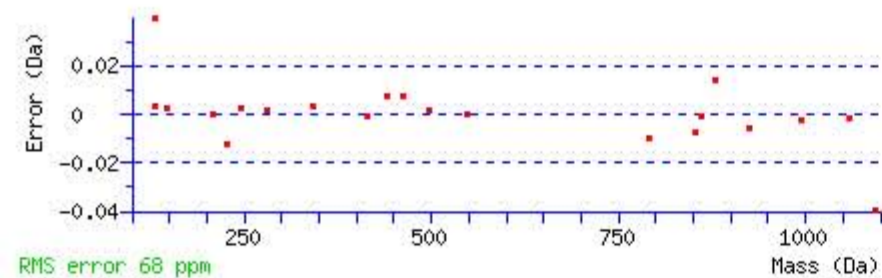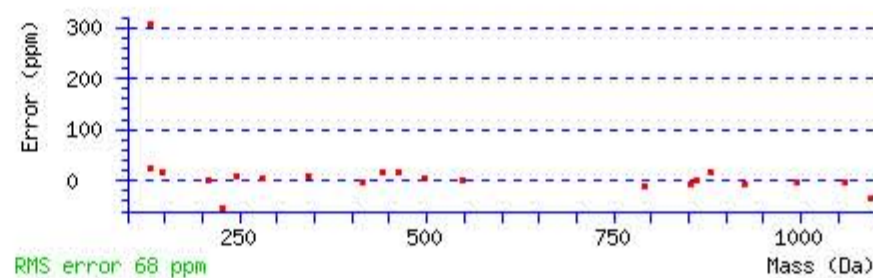

NCBI BLAST search of **EPAAQAPVK**

(Parameters: blastp, nr protein database, expect=20000, no filter, PAM30)

Other BLAST [web gateways](#)

All matches to this query

| Score | $M_r(\text{calc})$ : | Delta     | Sequence                    |
|-------|----------------------|-----------|-----------------------------|
| 51.7  | 1220.658707          | -0.002099 | <a href="#">EPAAQAPVK</a>   |
| 12.2  | 1220.658722          | -0.002114 | <a href="#">EQNVPVPK</a>    |
| 2.3   | 1220.651321          | 0.005287  | <a href="#">GQVLIASSYGR</a> |
| 1.9   | 1220.666580          | -0.009972 | <a href="#">EPAIVRFFSR</a>  |
| 0.9   | 1220.640076          | 0.016532  | <a href="#">LLAEYTGAAQK</a> |

# Mascot Search Results

## Peptide View

MS/MS Fragmentation of **SLWNAGTSVTCTLNHPSSLPPQR**  
 Found in **IGHD\_HUMAN**, Ig delta chain C region OS=Homo sapiens GN=IGHD PE=1 SV=2

Match to Query 50896: 2746.385952 from(916.469260,3+) rtinseconds(2257) index(62050)  
 Title: Locus:1.1.1.1697.25 File:"2013-07-02 CLN FXIII 180 min 3rd FT.wiff"  
 Data file C:\Program Files (x86)\Matrix Science\Mascot Daemon\mgf9 FXIII 180 min 3rd\mascot\_daemon\_merge.mgf

Click mouse within plot area to zoom in by factor of two about that point  
 Or, Plot from 0 to 2600 Da Full range  
 Label all possible matches  Label matches used for scoring

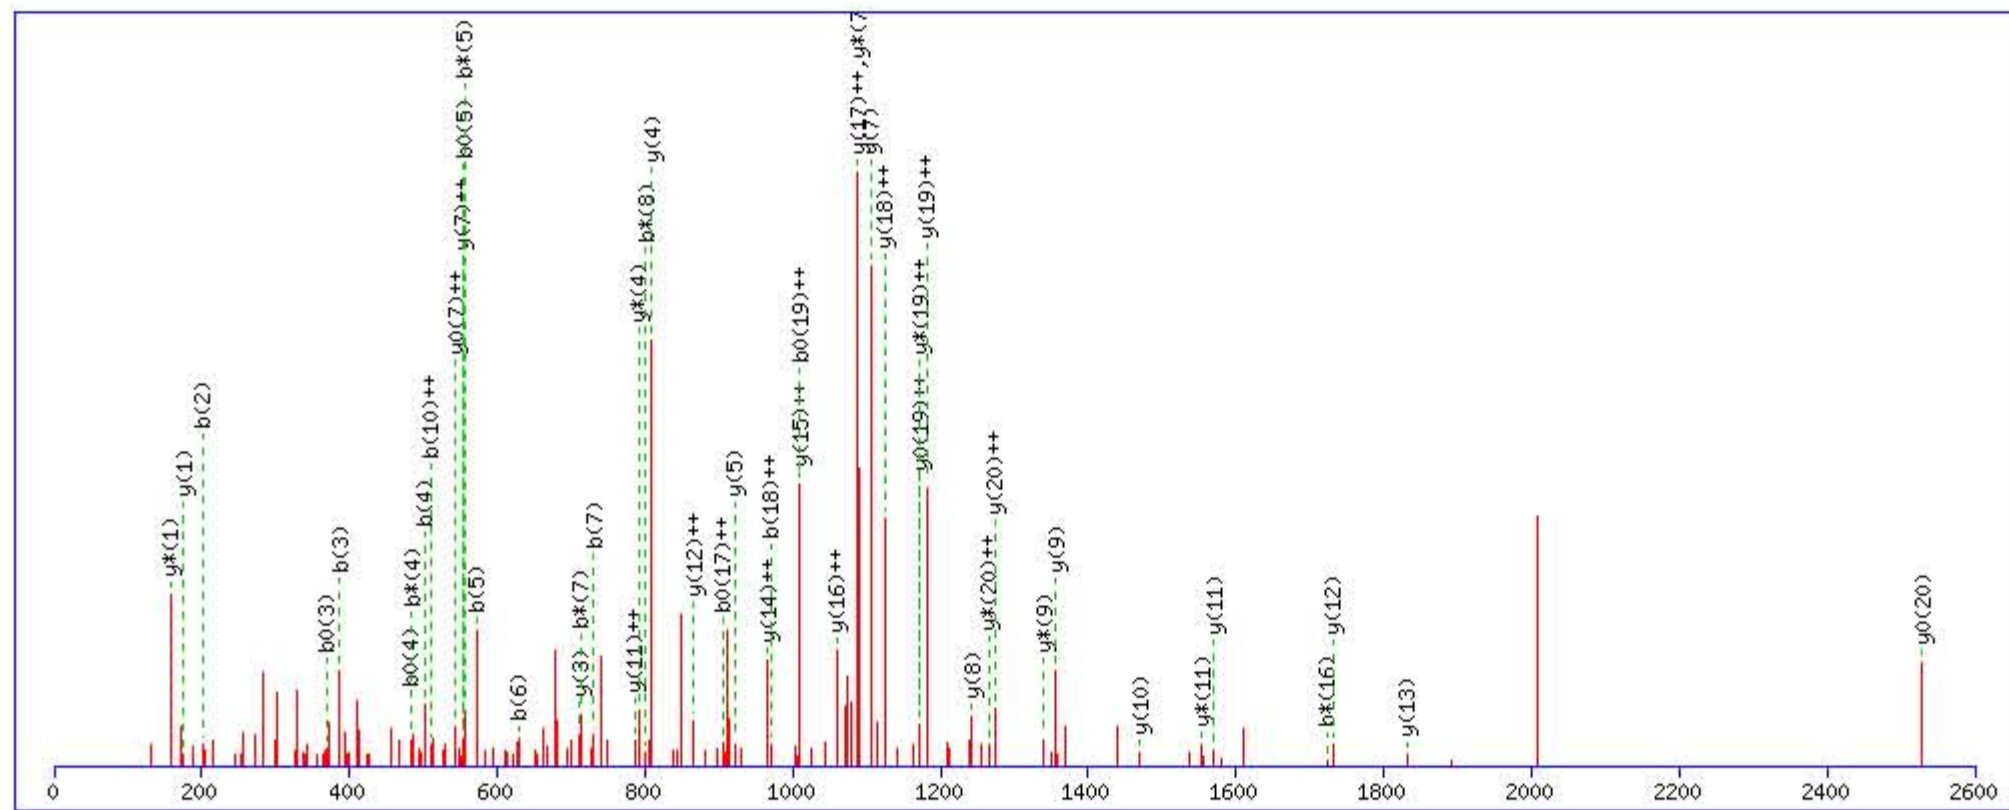

Monoisotopic mass of neutral peptide Mr(calc): 2746.368332  
 Fixed modifications: Carbamidomethyl (C) (apply to specified residues or termini only)  
 Variable modifications:  
 Q21 : Biotin:Thermo-21345 (Q)  
 Ions Score: 42 Expect: 0.0017  
 Matches : 49/236 fragment ions using 136 most intense peaks [\(help\)](#)

| #  | b                 | b <sup>++</sup>   | b <sup>*</sup>     | b <sup>*++</sup> | b <sup>0</sup>    | b <sup>0++</sup>   | Seq. | y                  | y <sup>++</sup>    | y <sup>*</sup>     | y <sup>*++</sup>   | y <sup>0</sup>     | y <sup>0++</sup>   | #  |
|----|-------------------|-------------------|--------------------|------------------|-------------------|--------------------|------|--------------------|--------------------|--------------------|--------------------|--------------------|--------------------|----|
| 1  | 88.039304         | 44.523290         |                    |                  | 70.028739         | 35.518008          | S    |                    |                    |                    |                    |                    |                    | 22 |
| 2  | <b>201.123368</b> | 101.065322        |                    |                  | 183.112803        | 92.060039          | L    | 2660.343575        | 1330.675425        | 2643.317026        | 1322.162151        | 2642.333010        | 1321.670143        | 21 |
| 3  | <b>387.202681</b> | 194.104978        |                    |                  | <b>369.192116</b> | 185.099696         | W    | 2547.259511        | <b>1274.133393</b> | 2530.232962        | <b>1265.620119</b> | <b>2529.248946</b> | 1265.128111        | 20 |
| 4  | <b>501.245608</b> | 251.126442        | <b>484.219059</b>  | 242.613168       | <b>483.235043</b> | 242.121160         | N    | 2361.180198        | <b>1181.093737</b> | 2344.153649        | <b>1172.580462</b> | 2343.169633        | <b>1172.088454</b> | 19 |
| 5  | <b>572.282722</b> | 286.644999        | <b>555.256173</b>  | 278.131725       | <b>554.272157</b> | 277.639717         | A    | 2247.137271        | <b>1124.072273</b> | 2230.110722        | 1115.558999        | 2229.126706        | 1115.066991        | 18 |
| 6  | <b>629.304186</b> | 315.155731        | 612.277637         | 306.642457       | 611.293621        | 306.150449         | G    | 2176.100157        | <b>1088.553716</b> | 2159.073608        | 1080.040442        | 2158.089592        | 1079.548434        | 17 |
| 7  | <b>730.351865</b> | 365.679571        | <b>713.325316</b>  | 357.166296       | 712.341300        | 356.674288         | T    | 2119.078693        | <b>1060.042984</b> | 2102.052144        | 1051.529710        | 2101.068128        | 1051.037702        | 16 |
| 8  | 817.383893        | 409.195585        | <b>800.357344</b>  | 400.682310       | 799.373328        | 400.190302         | S    | 2018.031014        | <b>1009.519145</b> | 2001.004465        | 1001.005871        | 2000.020449        | 1000.513863        | 15 |
| 9  | 916.452307        | 458.729792        | 899.425758         | 450.216517       | 898.441742        | 449.724509         | V    | 1930.998986        | <b>966.003131</b>  | 1913.972437        | 957.489857         | 1912.988421        | 956.997849         | 14 |
| 10 | 1017.499986       | <b>509.253631</b> | 1000.473437        | 500.740357       | 999.489421        | 500.248349         | T    | <b>1831.930572</b> | 916.468924         | 1814.904023        | 907.955650         | 1813.920007        | 907.463642         | 13 |
| 11 | 1177.530635       | 589.268956        | 1160.504086        | 580.755681       | 1159.520070       | 580.263673         | C    | <b>1730.882893</b> | <b>865.945085</b>  | 1713.856344        | 857.431810         | 1712.872328        | 856.939802         | 12 |
| 12 | 1278.578314       | 639.792795        | 1261.551765        | 631.279521       | 1260.567749       | 630.787513         | T    | <b>1570.852244</b> | <b>785.929760</b>  | <b>1553.825695</b> | 777.416486         | 1552.841679        | 776.924478         | 11 |
| 13 | 1391.662378       | 696.334827        | 1374.635829        | 687.821553       | 1373.651813       | 687.329545         | L    | <b>1469.804565</b> | 735.405921         | 1452.778016        | 726.892646         | 1451.794000        | 726.400638         | 10 |
| 14 | 1505.705305       | 753.356291        | 1488.678756        | 744.843016       | 1487.694740       | 744.351008         | N    | <b>1356.720501</b> | 678.863889         | <b>1339.693952</b> | 670.350614         | 1338.709936        | 669.858606         | 9  |
| 15 | 1642.764217       | 821.885746        | 1625.737668        | 813.372472       | 1624.753652       | 812.880464         | H    | <b>1242.677574</b> | 621.842425         | 1225.651025        | 613.329151         | 1224.667009        | 612.837143         | 8  |
| 16 | 1739.816981       | 870.412128        | <b>1722.790432</b> | 861.898854       | 1721.806416       | 861.406846         | P    | <b>1105.618662</b> | <b>553.312969</b>  | <b>1088.592113</b> | 544.799695         | 1087.608097        | <b>544.307687</b>  | 7  |
| 17 | 1826.849009       | 913.928143        | 1809.822460        | 905.414868       | 1808.838444       | 904.922860         | S    | 1008.565898        | 504.786587         | 991.539349         | 496.273313         | 990.555333         | 495.781305         | 6  |
| 18 | 1939.933073       | <b>970.470174</b> | 1922.906524        | 961.956900       | 1921.922508       | 961.464892         | L    | <b>921.533870</b>  | 461.270573         | 904.507321         | 452.757299         |                    |                    | 5  |
| 19 | 2036.985837       | 1018.996557       | 2019.959288        | 1010.483282      | 2018.975272       | <b>1009.991274</b> | P    | <b>808.449806</b>  | 404.728541         | <b>791.423257</b>  | 396.215267         |                    |                    | 4  |
| 20 | 2134.038601       | 1067.522938       | 2117.012052        | 1059.009664      | 2116.028036       | 1058.517656        | P    | <b>711.397042</b>  | 356.202159         | 694.370493         | 347.688885         |                    |                    | 3  |
| 21 | 2573.263927       | 1287.135601       | 2556.237378        | 1278.622327      | 2555.253362       | 1278.130319        | Q    | 614.344278         | 307.675777         | 597.317729         | 299.162503         |                    |                    | 2  |
| 22 |                   |                   |                    |                  |                   |                    | R    | <b>175.118952</b>  | 88.063114          | <b>158.092403</b>  | 79.549839          |                    |                    | 1  |

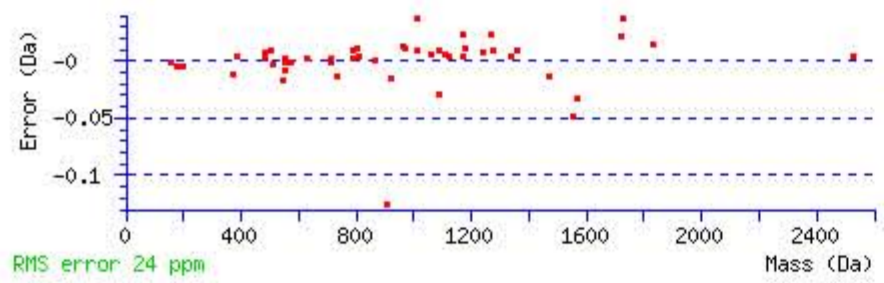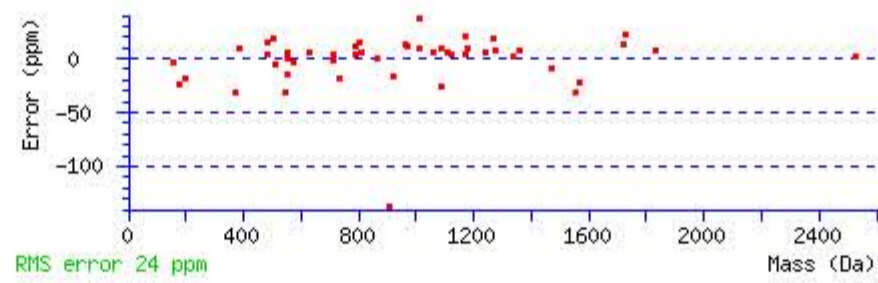

NCBI BLAST search of **SLWNAGTSVTCTLNHPSSLPPQR**  
 (Parameters: blastp, nr protein database, expect=20000, no filter, PAM30)  
 Other BLAST [web gateways](#)

### All matches to this query

| Score | Mr(calc):   | Delta    | Sequence                       |
|-------|-------------|----------|--------------------------------|
| 42.4  | 2746.368332 | 0.017620 | <b>SLWNAGTSVTCTLNHPSSLPPQR</b> |



# MASCOT Search Results

## Peptide View

MS/MS Fragmentation of **NQVSLTCLVK**

Found in **IGHG1\_HUMAN**, Ig gamma-1 chain C region OS=Homo sapiens GN=IGHG1 PE=1 SV=1

Match to Query 26441: 1471.795828 from(736.905190,2+) rtinseconds(2245) index(61966)

Title: Locus:1.1.1.1693.20 File:"2013-07-02 CLN FXIII 180 min 3rd FT.wiff"

Data file C:\Program Files (x86)\Matrix Science\Mascot Daemon\mgf9 FXIII 180 min 3rd\mascot\_daemon\_merge.mgf

Click mouse within plot area to zoom in by factor of two about that point

Or, Plot from  to  Da

Label all possible matches  Label matches used for scoring

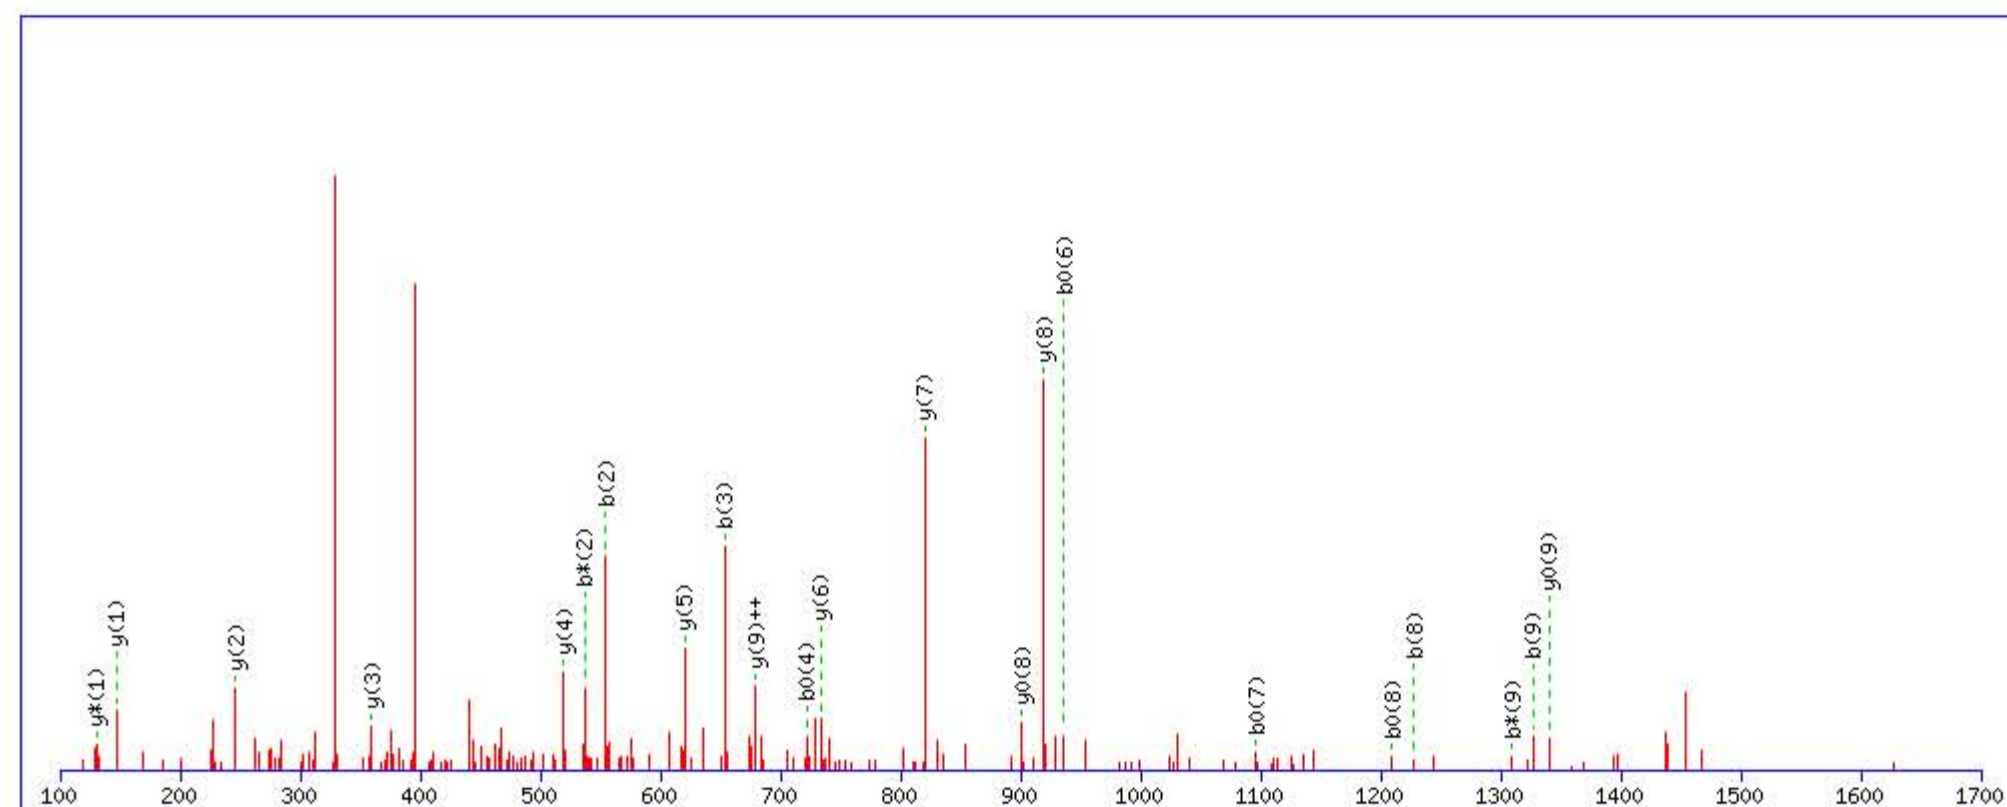

Monoisotopic mass of neutral peptide Mr(calc): 1471.789093

Fixed modifications: Carbamidomethyl (C) (apply to specified residues or termini only)

Variable modifications:

Q2 : Biotin:Thermo-21345 (Q)

Ions Score: 46 Expect: 0.00024

Matches : 22/94 fragment ions using 42 most intense peaks [\(help\)](#)

| #  | b                  | b <sup>++</sup> | b <sup>+</sup>     | b <sup>+++</sup> | b <sup>0</sup>     | b <sup>0++</sup> | Seq. | y                 | y <sup>++</sup>   | y <sup>+</sup>    | y <sup>+++</sup> | y <sup>0</sup>     | y <sup>0++</sup> | #  |
|----|--------------------|-----------------|--------------------|------------------|--------------------|------------------|------|-------------------|-------------------|-------------------|------------------|--------------------|------------------|----|
| 1  | 115.050203         | 58.028740       | 98.023654          | 49.515465        |                    |                  | N    |                   |                   |                   |                  |                    |                  | 10 |
| 2  | <b>554.275529</b>  | 277.641403      | <b>537.248980</b>  | 269.128128       |                    |                  | Q    | 1358.753442       | <b>679.880359</b> | 1341.726893       | 671.367085       | <b>1340.742877</b> | 670.875076       | 9  |
| 3  | <b>653.343943</b>  | 327.175610      | 636.317394         | 318.662335       |                    |                  | V    | <b>919.528116</b> | 460.267696        | 902.501567        | 451.754421       | <b>901.517551</b>  | 451.262413       | 8  |
| 4  | 740.375971         | 370.691623      | 723.349422         | 362.178349       | <b>722.365406</b>  | 361.686341       | S    | <b>820.459702</b> | 410.733489        | 803.433153        | 402.220215       | 802.449137         | 401.728207       | 7  |
| 5  | 853.460035         | 427.233656      | 836.433486         | 418.720381       | 835.449470         | 418.228373       | L    | <b>733.427674</b> | 367.217475        | 716.401125        | 358.704201       | 715.417109         | 358.212193       | 6  |
| 6  | 954.507714         | 477.757495      | 937.481165         | 469.244220       | <b>936.497149</b>  | 468.752212       | T    | <b>620.343610</b> | 310.675443        | 603.317061        | 302.162169       | 602.333045         | 301.670161       | 5  |
| 7  | 1114.538363        | 557.772819      | 1097.511814        | 549.259545       | <b>1096.527798</b> | 548.767537       | C    | <b>519.295931</b> | 260.151604        | 502.269382        | 251.638329       |                    |                  | 4  |
| 8  | <b>1227.622427</b> | 614.314851      | 1210.595878        | 605.801577       | <b>1209.611862</b> | 605.309569       | L    | <b>359.265282</b> | 180.136279        | 342.238733        | 171.623004       |                    |                  | 3  |
| 9  | <b>1326.690841</b> | 663.849058      | <b>1309.664292</b> | 655.335784       | 1308.680276        | 654.843776       | V    | <b>246.181218</b> | 123.594247        | 229.154669        | 115.080973       |                    |                  | 2  |
| 10 |                    |                 |                    |                  |                    |                  | K    | <b>147.112804</b> | 74.060040         | <b>130.086255</b> | 65.546765        |                    |                  | 1  |

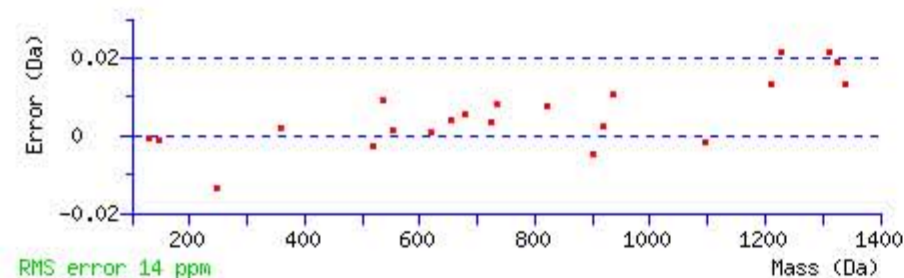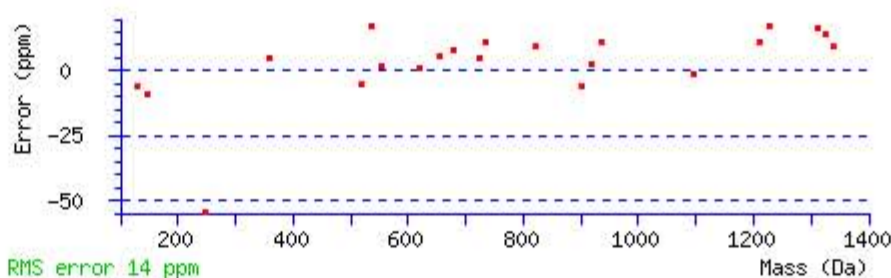

NCBI BLAST search of **NQVSLTCLVK**

(Parameters: blastp, nr protein database, expect=20000, no filter, PAM30)

Other BLAST [web gateways](#)

## All matches to this query

| Score | Mr(calc):   | Delta     | Sequence                      |
|-------|-------------|-----------|-------------------------------|
| 45.5  | 1471.789093 | 0.006735  | <a href="#">NQVSLTCLVK</a>    |
| 6.4   | 1471.803467 | -0.007639 | <a href="#">EKQGPLLDLFGQK</a> |
| 5.1   | 1471.796921 | -0.001093 | <a href="#">YLIAACQHLQKK</a>  |
| 4.1   | 1471.797592 | -0.001764 | <a href="#">KYFWDRAFLVK</a>   |
| 3.8   | 1471.777847 | 0.017981  | <a href="#">QLDMELVSVK</a>    |
| 3.0   | 1471.806808 | -0.010980 | <a href="#">ESLLQIPRIEMK</a>  |
| 2.8   | 1471.793106 | 0.002722  | <a href="#">QPFMVDILAK</a>    |
| 2.5   | 1471.799438 | -0.003610 | <a href="#">EVELDRLRDTVK</a>  |
| 2.2   | 1471.814713 | -0.018885 | <a href="#">RQVIVGTWGESLK</a> |
| 0.1   | 1471.788162 | 0.007666  | <a href="#">ELEAEKLQKEQK</a>  |

# MASCOT SEARCH RESULTS

## Peptide View

MS/MS Fragmentation of **EPQVYTLPPSR**

Found in **IGHG1\_HUMAN**, Ig gamma-1 chain C region OS=Homo sapiens GN=IGHG1 PE=1 SV=1

Match to Query 30487: 1596.834408 from(799.424480,2+) rtinseconds(2036) index(60816)  
 Title: Locus:1.1.1.1620.15 File:"2013-07-02 CLN FXIII 180 min 3rd FT.wiff"  
 Data file C:\Program Files (x86)\Matrix Science\Mascot Daemon\mgf\9 FXIII 180 min 3rd\mascot\_daemon\_merge.mgf

Click mouse within plot area to zoom in by factor of two about that point  
 Or, Plot from  to  Da   
 Label all possible matches  Label matches used for scoring

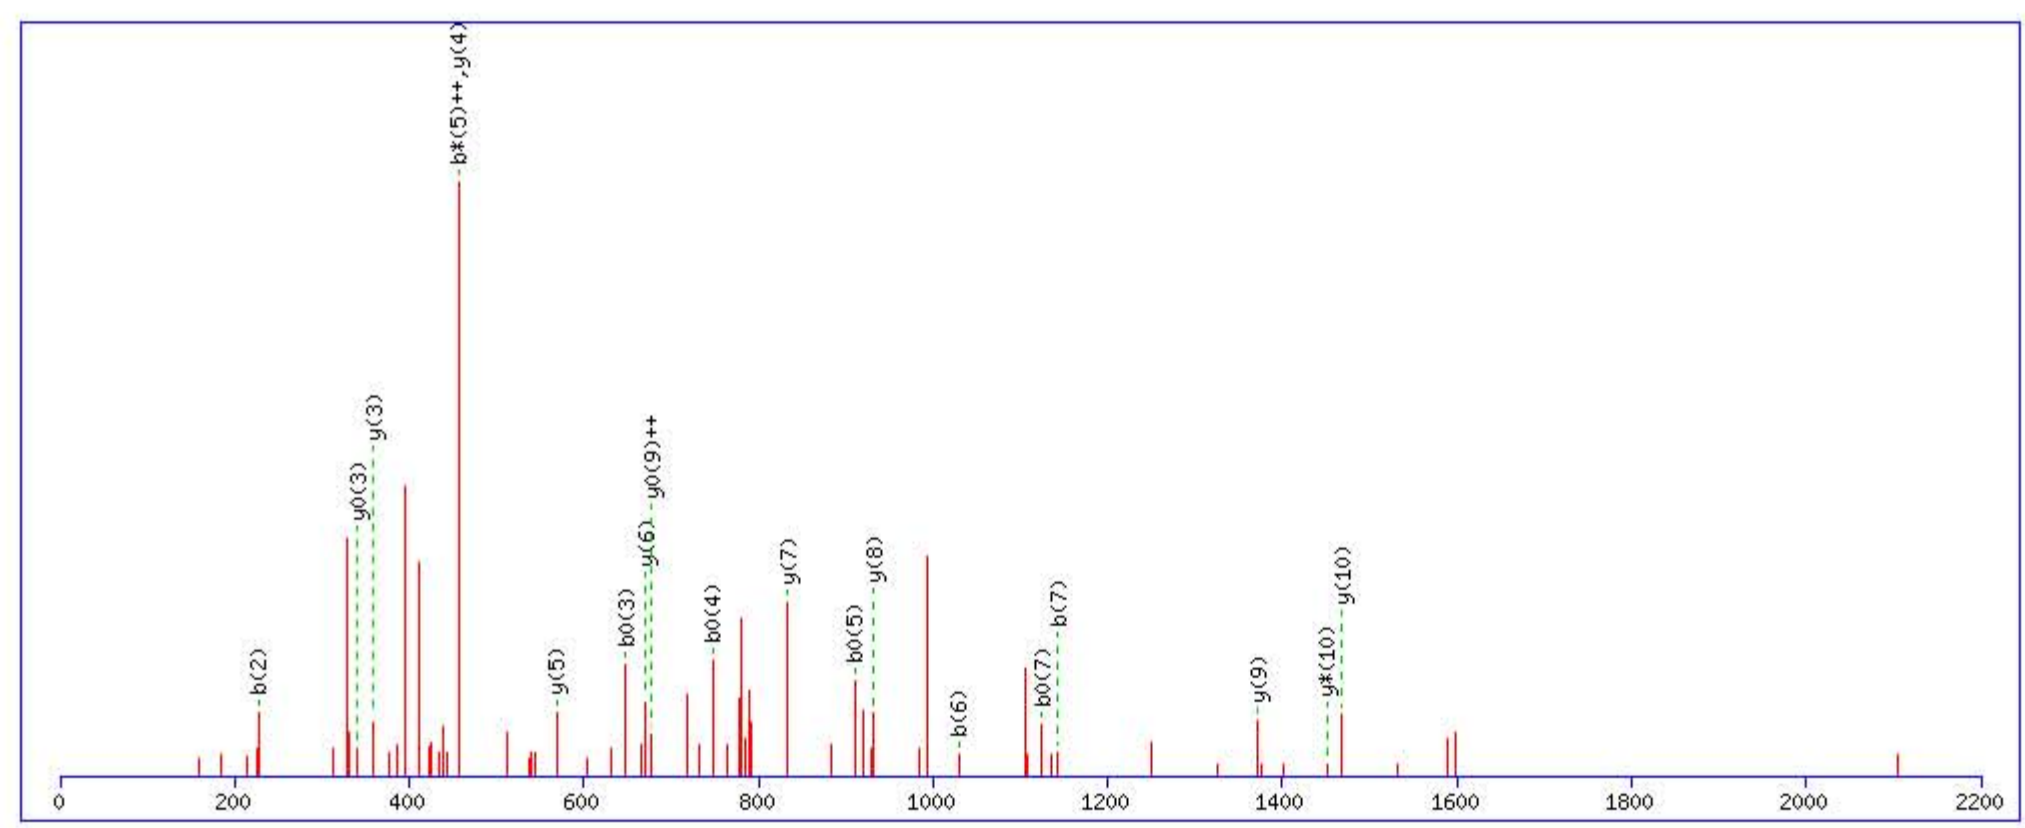

Monoisotopic mass of neutral peptide Mr(calc): 1596.833389  
 Fixed modifications: Carbamidomethyl (C) (apply to specified residues or termini only)  
 Variable modifications:  
 Q3 : Biotin:Thermo-21345 (Q)  
 Ions Score: 33 Expect: 0.0012  
 Matches : 19/114 fragment ions using 49 most intense peaks [\(help\)](#)

| #  | b                  | b <sup>++</sup> | b <sup>*</sup> | b <sup>*++</sup>  | b <sup>0</sup>     | b <sup>0++</sup> | Seq. | y                  | y <sup>++</sup> | y <sup>*</sup>     | y <sup>*++</sup> | y <sup>0</sup>    | y <sup>0++</sup>  | #  |
|----|--------------------|-----------------|----------------|-------------------|--------------------|------------------|------|--------------------|-----------------|--------------------|------------------|-------------------|-------------------|----|
| 1  | 130.049869         | 65.528572       |                |                   | 112.039304         | 56.523290        | E    |                    |                 |                    |                  |                   |                   | 11 |
| 2  | <b>227.102633</b>  | 114.054954      |                |                   | 209.092068         | 105.049672       | P    | <b>1468.798084</b> | 734.902680      | <b>1451.771535</b> | 726.389406       | 1450.787519       | 725.897398        | 10 |
| 3  | 666.327959         | 333.667618      | 649.301410     | 325.154343        | <b>648.317394</b>  | 324.662335       | Q    | <b>1371.745320</b> | 686.376298      | 1354.718771        | 677.863024       | 1353.734755       | <b>677.371016</b> | 9  |
| 4  | 765.396373         | 383.201825      | 748.369824     | 374.688550        | <b>747.385808</b>  | 374.196542       | V    | <b>932.519994</b>  | 466.763635      | 915.493445         | 458.250361       | 914.509429        | 457.758353        | 8  |
| 5  | 928.459702         | 464.733489      | 911.433153     | <b>456.220215</b> | <b>910.449137</b>  | 455.728207       | Y    | <b>833.451580</b>  | 417.229428      | 816.425031         | 408.716154       | 815.441015        | 408.224146        | 7  |
| 6  | <b>1029.507381</b> | 515.257329      | 1012.480832    | 506.744054        | 1011.496816        | 506.252046       | T    | <b>670.388251</b>  | 335.697764      | 653.361702         | 327.184489       | 652.377686        | 326.692481        | 6  |
| 7  | <b>1142.591445</b> | 571.799361      | 1125.564896    | 563.286086        | <b>1124.580880</b> | 562.794078       | L    | <b>569.340572</b>  | 285.173924      | 552.314023         | 276.660650       | 551.330007        | 276.168642        | 5  |
| 8  | 1239.644209        | 620.325743      | 1222.617660    | 611.812468        | 1221.633644        | 611.320460       | P    | <b>456.256508</b>  | 228.631892      | 439.229959         | 220.118618       | 438.245943        | 219.626610        | 4  |
| 9  | 1336.696973        | 668.852125      | 1319.670424    | 660.338850        | 1318.686408        | 659.846842       | P    | <b>359.203744</b>  | 180.105510      | 342.177195         | 171.592236       | <b>341.193179</b> | 171.100228        | 3  |
| 10 | 1423.729001        | 712.368139      | 1406.702452    | 703.854864        | 1405.718436        | 703.362856       | S    | 262.150980         | 131.579128      | 245.124431         | 123.065854       | 244.140415        | 122.573846        | 2  |
| 11 |                    |                 |                |                   |                    |                  | R    | 175.118952         | 88.063114       | 158.092403         | 79.549839        |                   |                   | 1  |

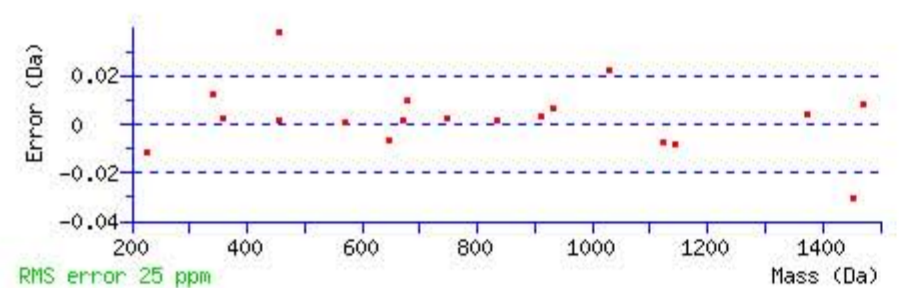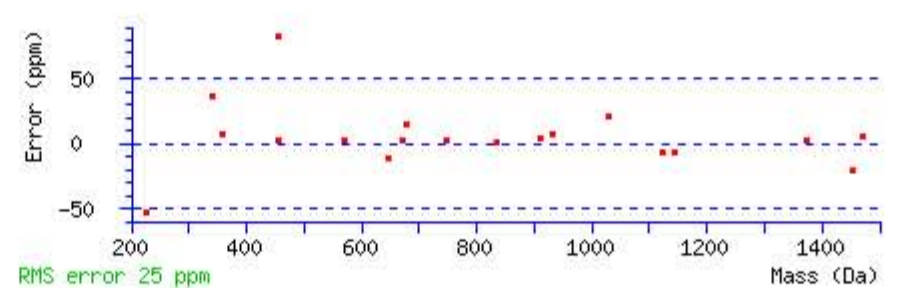

NCBI BLAST search of **EPQVYTLPPSR**  
 (Parameters: blastp, nr protein database, expect=20000, no filter, PAM30)  
 Other BLAST [web gateways](#)

### All matches to this query

| Score | Mr(calc):   | Delta     | Sequence                      |
|-------|-------------|-----------|-------------------------------|
| 33.3  | 1596.833389 | 0.001019  | <a href="#">EPQVYTLPPSR</a>   |
| 2.3   | 1596.818115 | 0.016293  | <a href="#">QEPEEKVVSNK</a>   |
| 0.7   | 1596.851135 | -0.016727 | <a href="#">LLFHGENEALDKV</a> |

# Mascot Search Results

## Peptide View

MS/MS Fragmentation of **WQQGNVFSCSVMEALHNHYTQK**

Found in **IGHG1\_HUMAN**, Ig gamma-1 chain C region OS=Homo sapiens GN=IGHG1 PE=1 SV=1

Match to Query 54772: 3111.419220 from(623.291120,5+) rtinseconds(2066) index(32261)

Title: Locus:1.1.1.3383.10 File:"2013-07-02 CLN FXIII 180 min 3rd F 3.wiff"

Data file C:\Program Files (x86)\Matrix Science\Mascot Daemon\mgf9 FXIII 180 min 3rd\mascot\_daemon\_merge.mgf

Click mouse within plot area to zoom in by factor of two about that point

Or, Plot from  to  Da

Label all possible matches  Label matches used for scoring

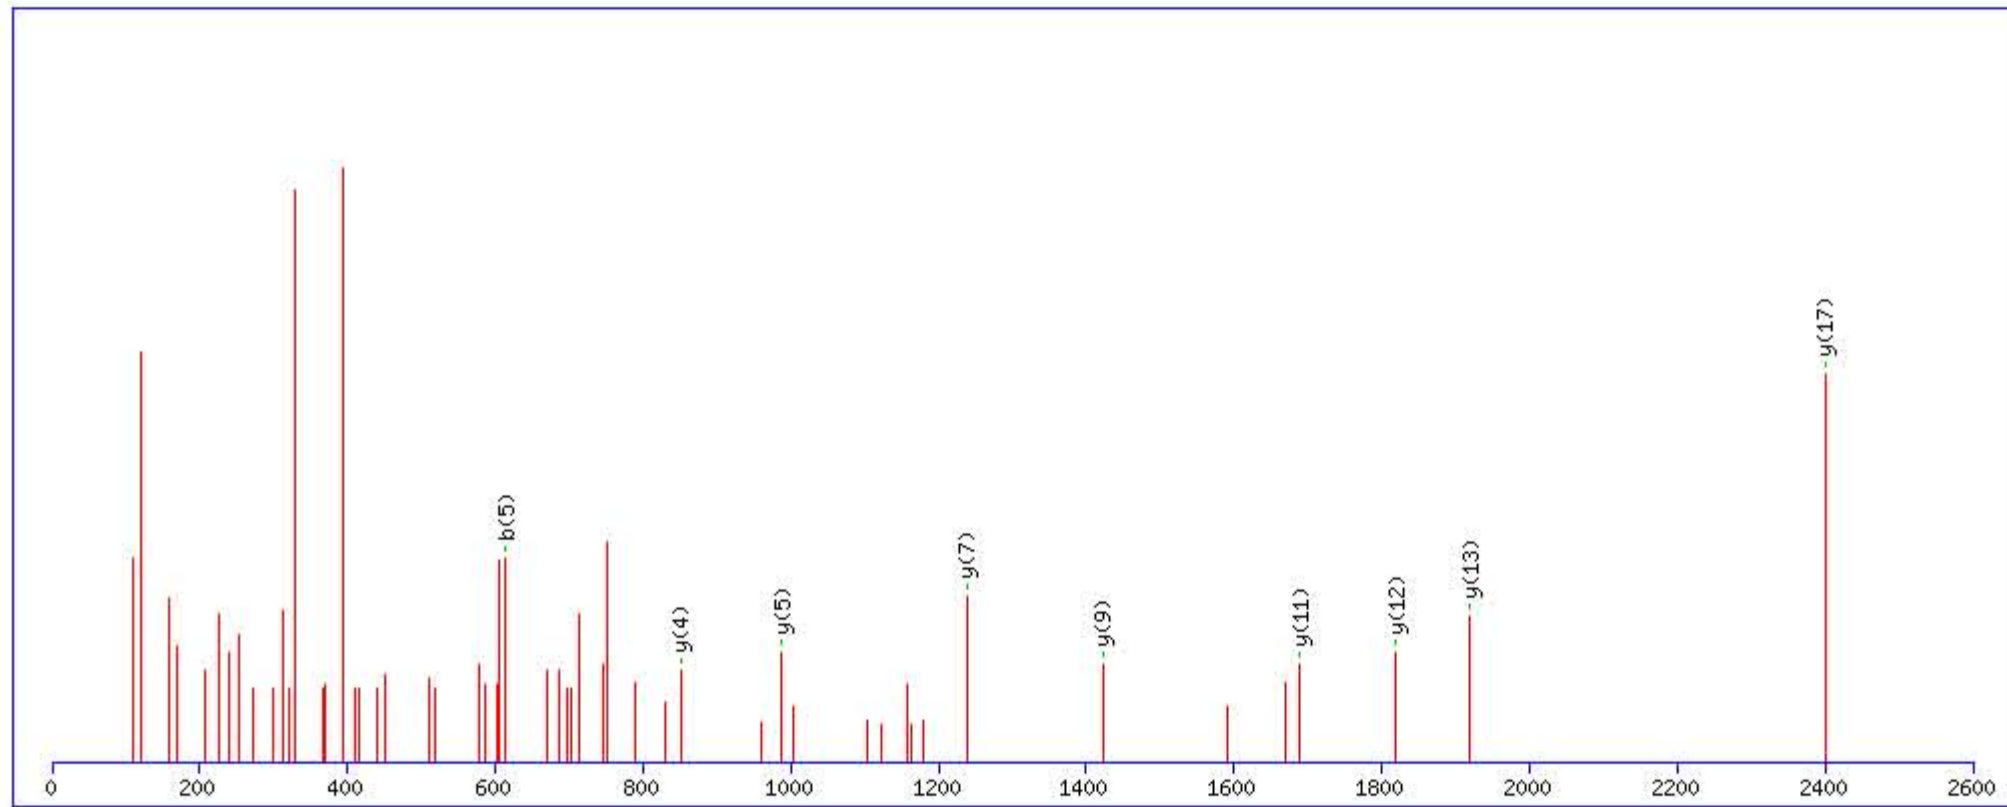

Monoisotopic mass of neutral peptide Mr(calc): 3111.426590

Fixed modifications: Carbamidomethyl (C) (apply to specified residues or termini only)

Variable modifications:

Q22 : Biotin:Thermo-21345 (Q)

Ions Score: 33 Expect: 0.0061

Matches : 9/244 fragment ions using 18 most intense peaks [\(help\)](#)

| #  | b                 | b <sup>++</sup> | b <sup>*</sup> | b <sup>*++</sup> | b <sup>0</sup> | b <sup>0++</sup> | Seq. | y                  | y <sup>++</sup> | y <sup>*</sup> | y <sup>*++</sup> | y <sup>0</sup> | y <sup>0++</sup> | #  |
|----|-------------------|-----------------|----------------|------------------|----------------|------------------|------|--------------------|-----------------|----------------|------------------|----------------|------------------|----|
| 1  | 187.086589        | 94.046932       |                |                  |                |                  | W    |                    |                 |                |                  |                |                  | 23 |
| 2  | 315.145167        | 158.076222      | 298.118618     | 149.562947       |                |                  | Q    | 2926.354551        | 1463.680913     | 2909.328002    | 1455.167639      | 2908.343986    | 1454.675631      | 22 |
| 3  | 443.203745        | 222.105511      | 426.177196     | 213.592236       |                |                  | Q    | 2798.295973        | 1399.651624     | 2781.269424    | 1391.138350      | 2780.285408    | 1390.646342      | 21 |
| 4  | 500.225209        | 250.616243      | 483.198660     | 242.102968       |                |                  | G    | 2670.237395        | 1335.622335     | 2653.210846    | 1327.109061      | 2652.226830    | 1326.617053      | 20 |
| 5  | <b>614.268136</b> | 307.637706      | 597.241587     | 299.124432       |                |                  | N    | 2613.215931        | 1307.111603     | 2596.189382    | 1298.598329      | 2595.205366    | 1298.106321      | 19 |
| 6  | 713.336550        | 357.171913      | 696.310001     | 348.658639       |                |                  | V    | 2499.173004        | 1250.090140     | 2482.146455    | 1241.576865      | 2481.162439    | 1241.084857      | 18 |
| 7  | 860.404964        | 430.706120      | 843.378415     | 422.192845       |                |                  | F    | <b>2400.104590</b> | 1200.555933     | 2383.078041    | 1192.042658      | 2382.094025    | 1191.550650      | 17 |
| 8  | 947.436992        | 474.222134      | 930.410443     | 465.708859       | 929.426427     | 465.216851       | S    | 2253.036176        | 1127.021726     | 2236.009627    | 1118.508451      | 2235.025611    | 1118.016443      | 16 |
| 9  | 1107.467641       | 554.237459      | 1090.441092    | 545.724184       | 1089.457076    | 545.232176       | C    | 2166.004148        | 1083.505712     | 2148.977599    | 1074.992437      | 2147.993583    | 1074.500429      | 15 |
| 10 | 1194.499669       | 597.753473      | 1177.473120    | 589.240198       | 1176.489104    | 588.748190       | S    | 2005.973499        | 1003.490388     | 1988.946950    | 994.977113       | 1987.962934    | 994.485105       | 14 |
| 11 | 1293.568083       | 647.287680      | 1276.541534    | 638.774405       | 1275.557518    | 638.282397       | V    | <b>1918.941471</b> | 959.974373      | 1901.914922    | 951.461099       | 1900.930906    | 950.969091       | 13 |
| 12 | 1424.608568       | 712.807922      | 1407.582019    | 704.294648       | 1406.598003    | 703.802640       | M    | <b>1819.873057</b> | 910.440166      | 1802.846508    | 901.926892       | 1801.862492    | 901.434884       | 12 |
| 13 | 1561.667480       | 781.337378      | 1544.640931    | 772.824104       | 1543.656915    | 772.332096       | H    | <b>1688.832572</b> | 844.919924      | 1671.806023    | 836.406649       | 1670.822007    | 835.914641       | 11 |
| 14 | 1690.710073       | 845.858675      | 1673.683524    | 837.345400       | 1672.699508    | 836.853392       | E    | 1551.773660        | 776.390468      | 1534.747111    | 767.877193       | 1533.763095    | 767.385185       | 10 |
| 15 | 1761.747187       | 881.377231      | 1744.720638    | 872.863957       | 1743.736622    | 872.371949       | A    | <b>1422.731067</b> | 711.869171      | 1405.704518    | 703.355897       | 1404.720502    | 702.863889       | 9  |
| 16 | 1874.831251       | 937.919263      | 1857.804702    | 929.405989       | 1856.820686    | 928.913981       | L    | 1351.693953        | 676.350615      | 1334.667404    | 667.837340       | 1333.683388    | 667.345332       | 8  |
| 17 | 2011.890163       | 1006.448719     | 1994.863614    | 997.935445       | 1993.879598    | 997.443437       | H    | <b>1238.609889</b> | 619.808583      | 1221.583340    | 611.295308       | 1220.599324    | 610.803300       | 7  |
| 18 | 2125.933090       | 1063.470183     | 2108.906541    | 1054.956908      | 2107.922525    | 1054.464900      | N    | 1101.550977        | 551.279127      | 1084.524428    | 542.765852       | 1083.540412    | 542.273844       | 6  |
| 19 | 2262.992002       | 1131.999639     | 2245.965453    | 1123.486364      | 2244.981437    | 1122.994356      | H    | <b>987.508050</b>  | 494.257663      | 970.481501     | 485.744389       | 969.497485     | 485.252381       | 5  |
| 20 | 2426.055331       | 1213.531303     | 2409.028782    | 1205.018029      | 2408.044766    | 1204.526021      | Y    | <b>850.449138</b>  | 425.728207      | 833.422589     | 417.214933       | 832.438573     | 416.722925       | 4  |
| 21 | 2527.103010       | 1264.055143     | 2510.076461    | 1255.541868      | 2509.092445    | 1255.049860      | T    | 687.385809         | 344.196543      | 670.359260     | 335.683268       | 669.375244     | 335.191260       | 3  |
| 22 | 2966.328336       | 1483.667806     | 2949.301787    | 1475.154531      | 2948.317771    | 1474.662523      | Q    | 586.338130         | 293.672703      | 569.311581     | 285.159429       |                |                  | 2  |
| 23 |                   |                 |                |                  |                |                  | K    | 147.112804         | 74.060040       | 130.086255     | 65.546765        |                |                  | 1  |

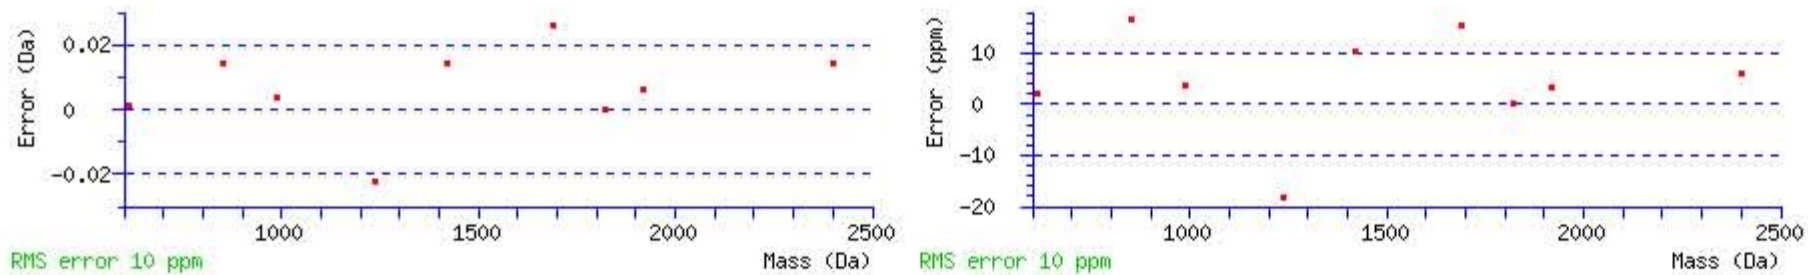

NCBI BLAST search of **WQQGNVFSCSVMEALHNHYTQK**

(Parameters: blastp, nr protein database, expect=20000, no filter, PAM30)

Other BLAST [web gateways](#)

### All matches to this query

| Score | Mr(calc):   | Delta     | Sequence                      |
|-------|-------------|-----------|-------------------------------|
| 33.0  | 3111.426590 | -0.007370 | <u>WQQGNVFSCSVMEALHNHYTQK</u> |

Mascot: <http://www.matrixscience.com/>

# MASCOT Search Results

## Peptide View

MS/MS Fragmentation of **NQVSLTCLVK**

Found in **IGHG1\_HUMAN**, Ig gamma-1 chain C region OS=Homo sapiens GN=IGHG1 PE=1 SV=1

Match to Query 26441: 1471.795828 from(736.905190,2+) rtinseconds(2245) index(61966)

Title: Locus:1.1.1.1693.20 File:"2013-07-02 CLN FXIII 180 min 3rd FT.wiff"

Data file C:\Program Files (x86)\Matrix Science\Mascot Daemon\mgf9 FXIII 180 min 3rd\mascot\_daemon\_merge.mgf

Click mouse within plot area to zoom in by factor of two about that point

Or, Plot from  to  Da

Label all possible matches  Label matches used for scoring

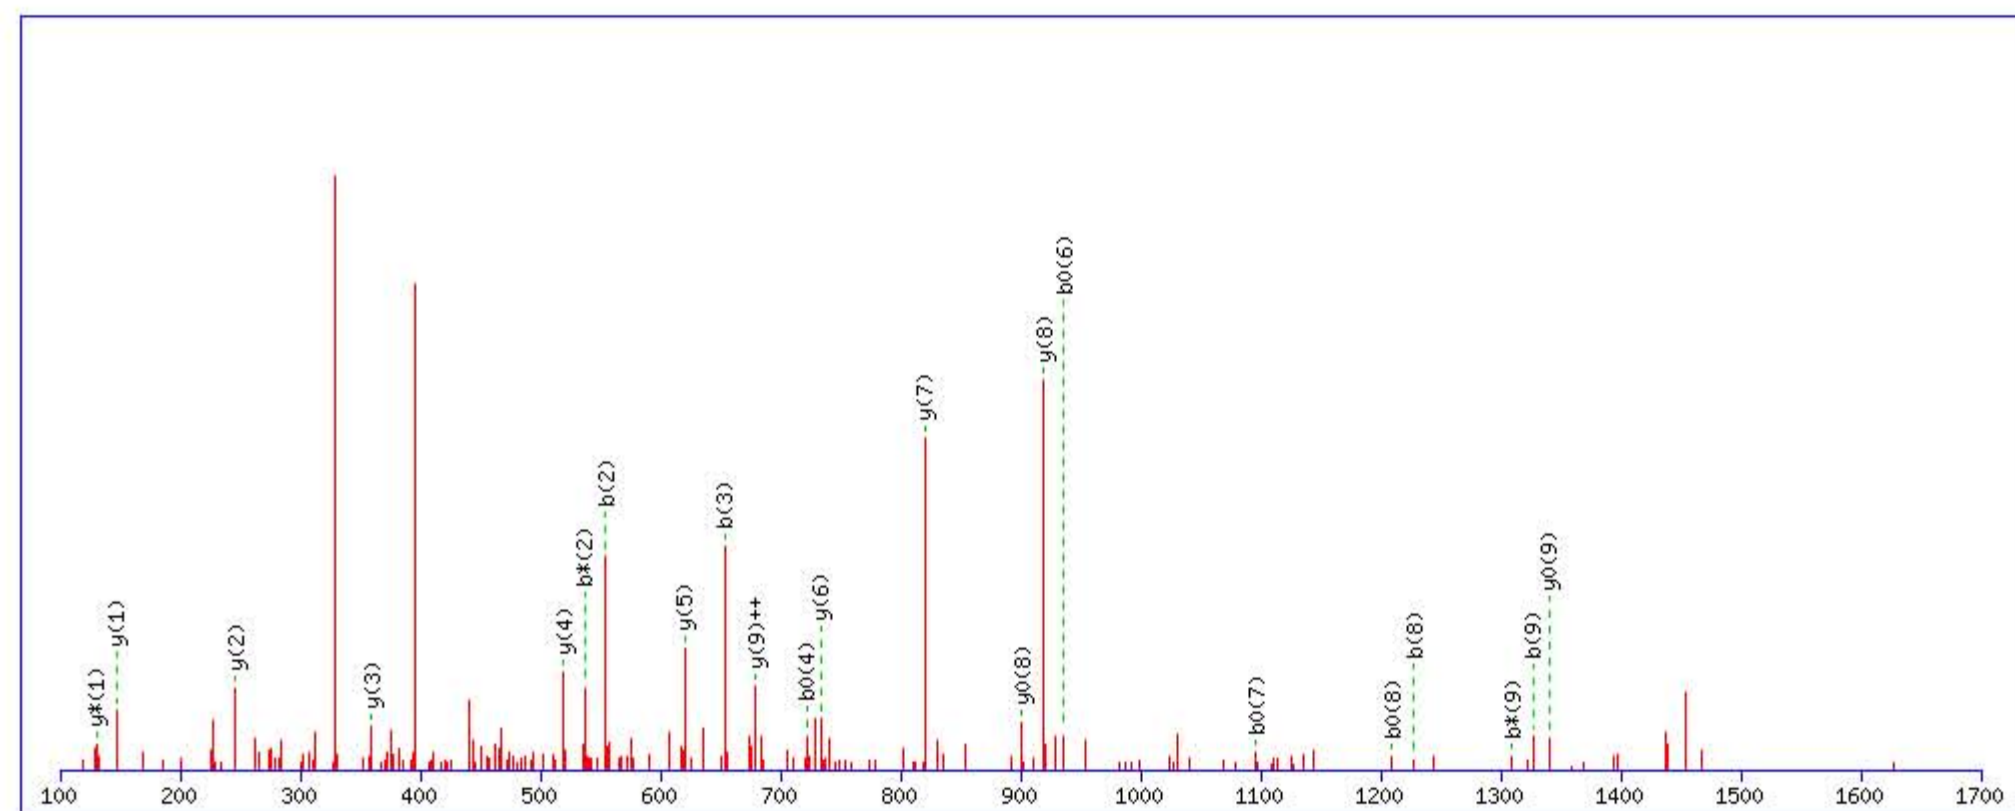

Monoisotopic mass of neutral peptide Mr(calc): 1471.789093

Fixed modifications: Carbamidomethyl (C) (apply to specified residues or termini only)

Variable modifications:

Q2 : Biotin:Thermo-21345 (Q)

Ions Score: 46 Expect: 0.00024

Matches : 22/94 fragment ions using 42 most intense peaks [\(help\)](#)

| #  | b                  | b <sup>++</sup> | b <sup>+</sup>     | b <sup>+++</sup> | b <sup>0</sup>     | b <sup>0++</sup> | Seq. | y                 | y <sup>++</sup>   | y <sup>+</sup>    | y <sup>+++</sup> | y <sup>0</sup>     | y <sup>0++</sup> | #  |
|----|--------------------|-----------------|--------------------|------------------|--------------------|------------------|------|-------------------|-------------------|-------------------|------------------|--------------------|------------------|----|
| 1  | 115.050203         | 58.028740       | 98.023654          | 49.515465        |                    |                  | N    |                   |                   |                   |                  |                    |                  | 10 |
| 2  | <b>554.275529</b>  | 277.641403      | <b>537.248980</b>  | 269.128128       |                    |                  | Q    | 1358.753442       | <b>679.880359</b> | 1341.726893       | 671.367085       | <b>1340.742877</b> | 670.875076       | 9  |
| 3  | <b>653.343943</b>  | 327.175610      | 636.317394         | 318.662335       |                    |                  | V    | <b>919.528116</b> | 460.267696        | 902.501567        | 451.754421       | <b>901.517551</b>  | 451.262413       | 8  |
| 4  | 740.375971         | 370.691623      | 723.349422         | 362.178349       | <b>722.365406</b>  | 361.686341       | S    | <b>820.459702</b> | 410.733489        | 803.433153        | 402.220215       | 802.449137         | 401.728207       | 7  |
| 5  | 853.460035         | 427.233656      | 836.433486         | 418.720381       | 835.449470         | 418.228373       | L    | <b>733.427674</b> | 367.217475        | 716.401125        | 358.704201       | 715.417109         | 358.212193       | 6  |
| 6  | 954.507714         | 477.757495      | 937.481165         | 469.244220       | <b>936.497149</b>  | 468.752212       | T    | <b>620.343610</b> | 310.675443        | 603.317061        | 302.162169       | 602.333045         | 301.670161       | 5  |
| 7  | 1114.538363        | 557.772819      | 1097.511814        | 549.259545       | <b>1096.527798</b> | 548.767537       | C    | <b>519.295931</b> | 260.151604        | 502.269382        | 251.638329       |                    |                  | 4  |
| 8  | <b>1227.622427</b> | 614.314851      | 1210.595878        | 605.801577       | <b>1209.611862</b> | 605.309569       | L    | <b>359.265282</b> | 180.136279        | 342.238733        | 171.623004       |                    |                  | 3  |
| 9  | <b>1326.690841</b> | 663.849058      | <b>1309.664292</b> | 655.335784       | 1308.680276        | 654.843776       | V    | <b>246.181218</b> | 123.594247        | 229.154669        | 115.080973       |                    |                  | 2  |
| 10 |                    |                 |                    |                  |                    |                  | K    | <b>147.112804</b> | 74.060040         | <b>130.086255</b> | 65.546765        |                    |                  | 1  |

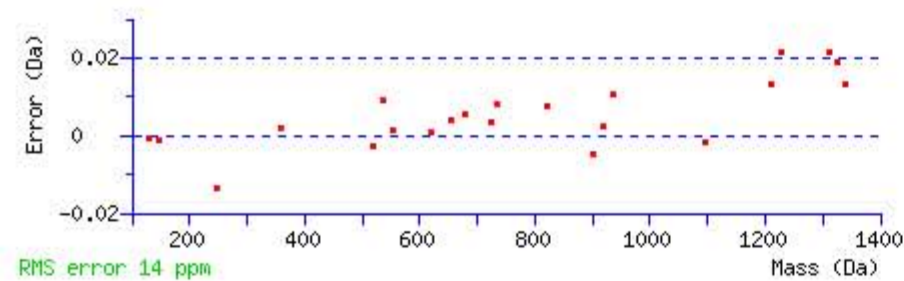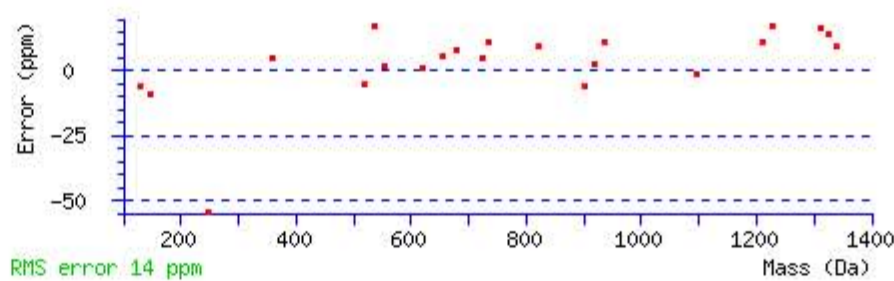

NCBI BLAST search of **NQVSLTCLVK**

(Parameters: blastp, nr protein database, expect=20000, no filter, PAM30)

Other BLAST [web gateways](#)

## All matches to this query

| Score | Mr(calc):   | Delta     | Sequence                      |
|-------|-------------|-----------|-------------------------------|
| 45.5  | 1471.789093 | 0.006735  | <a href="#">NQVSLTCLVK</a>    |
| 6.4   | 1471.803467 | -0.007639 | <a href="#">EKQGPLLDLFGQK</a> |
| 5.1   | 1471.796921 | -0.001093 | <a href="#">YLIAACQHLQKK</a>  |
| 4.1   | 1471.797592 | -0.001764 | <a href="#">KYFWDRAFLVK</a>   |
| 3.8   | 1471.777847 | 0.017981  | <a href="#">QLDMELVSVK</a>    |
| 3.0   | 1471.806808 | -0.010980 | <a href="#">ESLLQIPRIEMK</a>  |
| 2.8   | 1471.793106 | 0.002722  | <a href="#">QPFMVDILAK</a>    |
| 2.5   | 1471.799438 | -0.003610 | <a href="#">EVELDRLRDTVK</a>  |
| 2.2   | 1471.814713 | -0.018885 | <a href="#">RQVIVGTWGESLK</a> |
| 0.1   | 1471.788162 | 0.007666  | <a href="#">ELEAEKLQKEQK</a>  |

# MASCOT SEARCH RESULTS

## Peptide View

MS/MS Fragmentation of **EPQVYTLPPSR**

Found in **IGHG1\_HUMAN**, Ig gamma-1 chain C region OS=Homo sapiens GN=IGHG1 PE=1 SV=1

Match to Query 30487: 1596.834408 from(799.424480,2+) rtinseconds(2036) index(60816)  
 Title: Locus:1.1.1.1620.15 File:"2013-07-02 CLN FXIII 180 min 3rd FT.wiff"  
 Data file C:\Program Files (x86)\Matrix Science\Mascot Daemon\mgf\9 FXIII 180 min 3rd\mascot\_daemon\_merge.mgf

Click mouse within plot area to zoom in by factor of two about that point  
 Or, Plot from  to  Da   
 Label all possible matches  Label matches used for scoring



Monoisotopic mass of neutral peptide Mr(calc): 1596.833389  
 Fixed modifications: Carbamidomethyl (C) (apply to specified residues or termini only)  
 Variable modifications:  
 Q3 : Biotin:Thermo-21345 (Q)  
 Ions Score: 33 Expect: 0.0012  
 Matches : 19/114 fragment ions using 49 most intense peaks [\(help\)](#)

| #  | b                  | b <sup>++</sup> | b <sup>*</sup> | b <sup>*++</sup>  | b <sup>0</sup>     | b <sup>0++</sup> | Seq. | y                  | y <sup>++</sup> | y <sup>*</sup>     | y <sup>*++</sup> | y <sup>0</sup>    | y <sup>0++</sup>  | #  |
|----|--------------------|-----------------|----------------|-------------------|--------------------|------------------|------|--------------------|-----------------|--------------------|------------------|-------------------|-------------------|----|
| 1  | 130.049869         | 65.528572       |                |                   | 112.039304         | 56.523290        | E    |                    |                 |                    |                  |                   |                   | 11 |
| 2  | <b>227.102633</b>  | 114.054954      |                |                   | 209.092068         | 105.049672       | P    | <b>1468.798084</b> | 734.902680      | <b>1451.771535</b> | 726.389406       | 1450.787519       | 725.897398        | 10 |
| 3  | 666.327959         | 333.667618      | 649.301410     | 325.154343        | <b>648.317394</b>  | 324.662335       | Q    | <b>1371.745320</b> | 686.376298      | 1354.718771        | 677.863024       | 1353.734755       | <b>677.371016</b> | 9  |
| 4  | 765.396373         | 383.201825      | 748.369824     | 374.688550        | <b>747.385808</b>  | 374.196542       | V    | <b>932.519994</b>  | 466.763635      | 915.493445         | 458.250361       | 914.509429        | 457.758353        | 8  |
| 5  | 928.459702         | 464.733489      | 911.433153     | <b>456.220215</b> | <b>910.449137</b>  | 455.728207       | Y    | <b>833.451580</b>  | 417.229428      | 816.425031         | 408.716154       | 815.441015        | 408.224146        | 7  |
| 6  | <b>1029.507381</b> | 515.257329      | 1012.480832    | 506.744054        | 1011.496816        | 506.252046       | T    | <b>670.388251</b>  | 335.697764      | 653.361702         | 327.184489       | 652.377686        | 326.692481        | 6  |
| 7  | <b>1142.591445</b> | 571.799361      | 1125.564896    | 563.286086        | <b>1124.580880</b> | 562.794078       | L    | <b>569.340572</b>  | 285.173924      | 552.314023         | 276.660650       | 551.330007        | 276.168642        | 5  |
| 8  | 1239.644209        | 620.325743      | 1222.617660    | 611.812468        | 1221.633644        | 611.320460       | P    | <b>456.256508</b>  | 228.631892      | 439.229959         | 220.118618       | 438.245943        | 219.626610        | 4  |
| 9  | 1336.696973        | 668.852125      | 1319.670424    | 660.338850        | 1318.686408        | 659.846842       | P    | <b>359.203744</b>  | 180.105510      | 342.177195         | 171.592236       | <b>341.193179</b> | 171.100228        | 3  |
| 10 | 1423.729001        | 712.368139      | 1406.702452    | 703.854864        | 1405.718436        | 703.362856       | S    | 262.150980         | 131.579128      | 245.124431         | 123.065854       | 244.140415        | 122.573846        | 2  |
| 11 |                    |                 |                |                   |                    |                  | R    | 175.118952         | 88.063114       | 158.092403         | 79.549839        |                   |                   | 1  |



NCBI BLAST search of **EPQVYTLPPSR**  
 (Parameters: blastp, nr protein database, expect=20000, no filter, PAM30)  
 Other BLAST [web gateways](#)

### All matches to this query

| Score | Mr(calc):   | Delta     | Sequence                      |
|-------|-------------|-----------|-------------------------------|
| 33.3  | 1596.833389 | 0.001019  | <a href="#">EPQVYTLPPSR</a>   |
| 2.3   | 1596.818115 | 0.016293  | <a href="#">QEPEEKVVS NK</a>  |
| 0.7   | 1596.851135 | -0.016727 | <a href="#">LLFHGENEALDKV</a> |

# MASCOT Search Results

## Peptide View

MS/MS Fragmentation of **WQQGNVFSCSVMEALHNHYTQK**

Found in **IGHG1\_HUMAN**, Ig gamma-1 chain C region OS=Homo sapiens GN=IGHG1 PE=1 SV=1

Match to Query 54772: 3111.419220 from(623.291120,5+) rtinseconds(2066) index(32261)

Title: Locus:1.1.1.3383.10 File:"2013-07-02 CLN FXIII 180 min 3rd F 3.wiff"

Data file C:\Program Files (x86)\Matrix Science\Mascot Daemon\mgf9 FXIII 180 min 3rd\mascot\_daemon\_merge.mgf

Click mouse within plot area to zoom in by factor of two about that point

Or, Plot from  to  Da

Label all possible matches  Label matches used for scoring

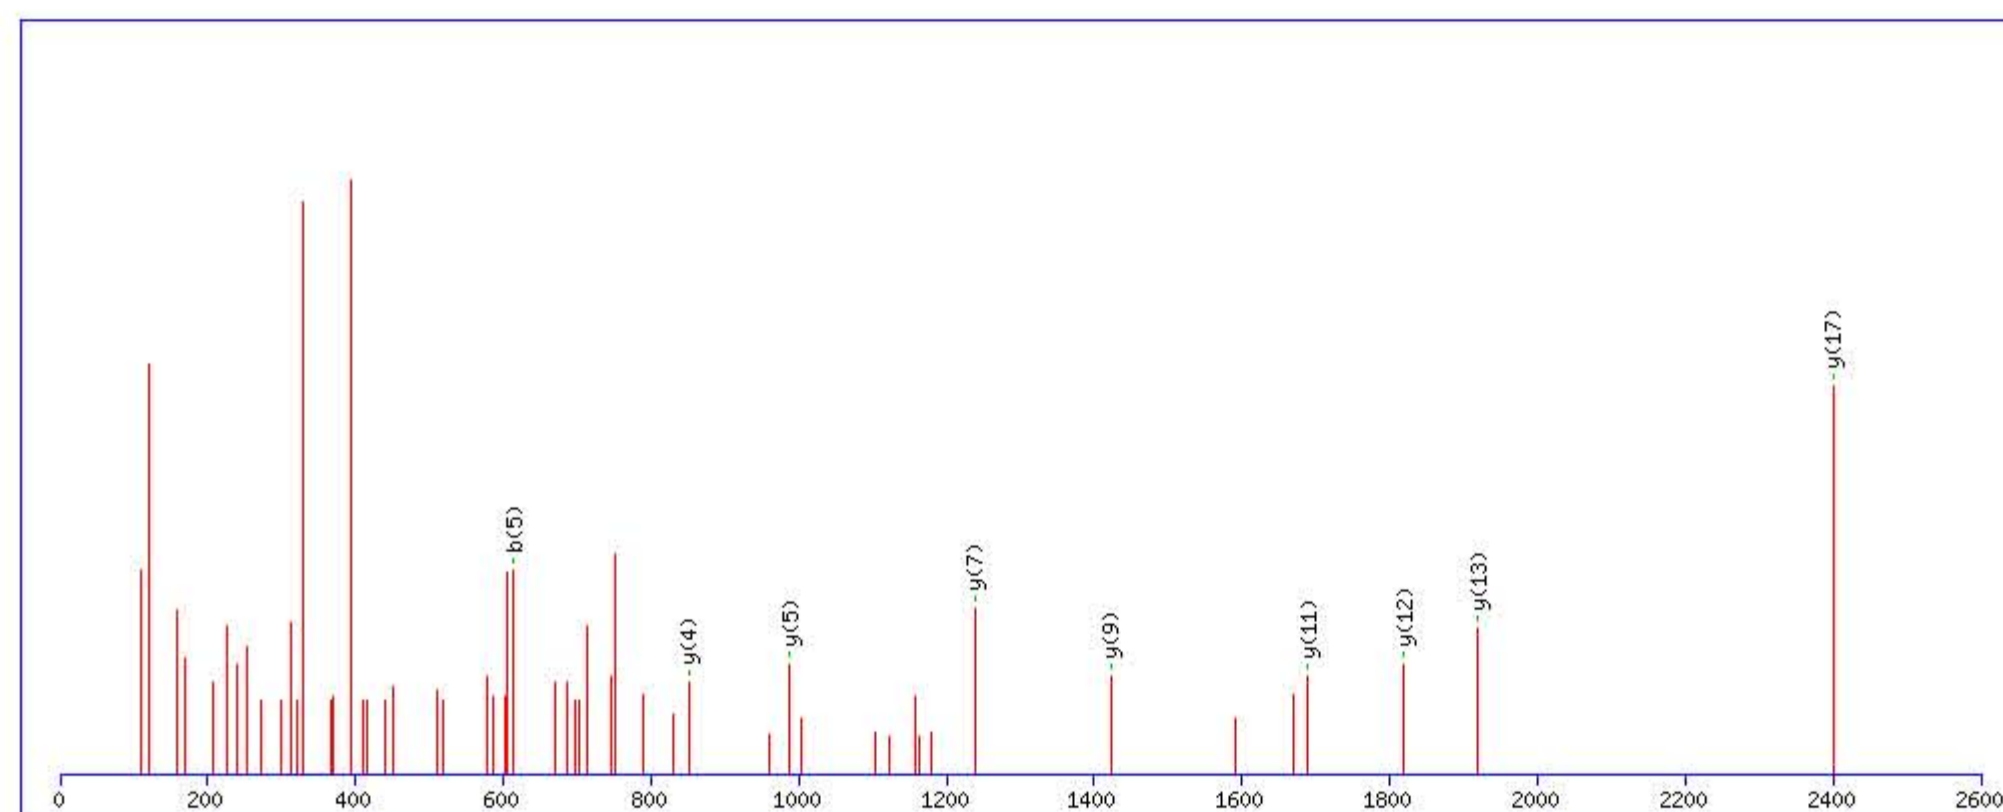

Monoisotopic mass of neutral peptide Mr(calc): 3111.426590

Fixed modifications: Carbamidomethyl (C) (apply to specified residues or termini only)

Variable modifications:

Q22 : Biotin:Thermo-21345 (Q)

Ions Score: 33 Expect: 0.0061

Matches : 9/244 fragment ions using 18 most intense peaks [\(help\)](#)

| #  | b                 | b <sup>++</sup> | b <sup>*</sup> | b <sup>*++</sup> | b <sup>0</sup> | b <sup>0++</sup> | Seq. | y                  | y <sup>++</sup> | y <sup>*</sup> | y <sup>*++</sup> | y <sup>0</sup> | y <sup>0++</sup> | #  |
|----|-------------------|-----------------|----------------|------------------|----------------|------------------|------|--------------------|-----------------|----------------|------------------|----------------|------------------|----|
| 1  | 187.086589        | 94.046932       |                |                  |                |                  | W    |                    |                 |                |                  |                |                  | 23 |
| 2  | 315.145167        | 158.076222      | 298.118618     | 149.562947       |                |                  | Q    | 2926.354551        | 1463.680913     | 2909.328002    | 1455.167639      | 2908.343986    | 1454.675631      | 22 |
| 3  | 443.203745        | 222.105511      | 426.177196     | 213.592236       |                |                  | Q    | 2798.295973        | 1399.651624     | 2781.269424    | 1391.138350      | 2780.285408    | 1390.646342      | 21 |
| 4  | 500.225209        | 250.616243      | 483.198660     | 242.102968       |                |                  | G    | 2670.237395        | 1335.622335     | 2653.210846    | 1327.109061      | 2652.226830    | 1326.617053      | 20 |
| 5  | <b>614.268136</b> | 307.637706      | 597.241587     | 299.124432       |                |                  | N    | 2613.215931        | 1307.111603     | 2596.189382    | 1298.598329      | 2595.205366    | 1298.106321      | 19 |
| 6  | 713.336550        | 357.171913      | 696.310001     | 348.658639       |                |                  | V    | 2499.173004        | 1250.090140     | 2482.146455    | 1241.576865      | 2481.162439    | 1241.084857      | 18 |
| 7  | 860.404964        | 430.706120      | 843.378415     | 422.192845       |                |                  | F    | <b>2400.104590</b> | 1200.555933     | 2383.078041    | 1192.042658      | 2382.094025    | 1191.550650      | 17 |
| 8  | 947.436992        | 474.222134      | 930.410443     | 465.708859       | 929.426427     | 465.216851       | S    | 2253.036176        | 1127.021726     | 2236.009627    | 1118.508451      | 2235.025611    | 1118.016443      | 16 |
| 9  | 1107.467641       | 554.237459      | 1090.441092    | 545.724184       | 1089.457076    | 545.232176       | C    | 2166.004148        | 1083.505712     | 2148.977599    | 1074.992437      | 2147.993583    | 1074.500429      | 15 |
| 10 | 1194.499669       | 597.753473      | 1177.473120    | 589.240198       | 1176.489104    | 588.748190       | S    | 2005.973499        | 1003.490388     | 1988.946950    | 994.977113       | 1987.962934    | 994.485105       | 14 |
| 11 | 1293.568083       | 647.287680      | 1276.541534    | 638.774405       | 1275.557518    | 638.282397       | V    | <b>1918.941471</b> | 959.974373      | 1901.914922    | 951.461099       | 1900.930906    | 950.969091       | 13 |
| 12 | 1424.608568       | 712.807922      | 1407.582019    | 704.294648       | 1406.598003    | 703.802640       | M    | <b>1819.873057</b> | 910.440166      | 1802.846508    | 901.926892       | 1801.862492    | 901.434884       | 12 |
| 13 | 1561.667480       | 781.337378      | 1544.640931    | 772.824104       | 1543.656915    | 772.332096       | H    | <b>1688.832572</b> | 844.919924      | 1671.806023    | 836.406649       | 1670.822007    | 835.914641       | 11 |
| 14 | 1690.710073       | 845.858675      | 1673.683524    | 837.345400       | 1672.699508    | 836.853392       | E    | 1551.773660        | 776.390468      | 1534.747111    | 767.877193       | 1533.763095    | 767.385185       | 10 |
| 15 | 1761.747187       | 881.377231      | 1744.720638    | 872.863957       | 1743.736622    | 872.371949       | A    | <b>1422.731067</b> | 711.869171      | 1405.704518    | 703.355897       | 1404.720502    | 702.863889       | 9  |
| 16 | 1874.831251       | 937.919263      | 1857.804702    | 929.405989       | 1856.820686    | 928.913981       | L    | 1351.693953        | 676.350615      | 1334.667404    | 667.837340       | 1333.683388    | 667.345332       | 8  |
| 17 | 2011.890163       | 1006.448719     | 1994.863614    | 997.935445       | 1993.879598    | 997.443437       | H    | <b>1238.609889</b> | 619.808583      | 1221.583340    | 611.295308       | 1220.599324    | 610.803300       | 7  |
| 18 | 2125.933090       | 1063.470183     | 2108.906541    | 1054.956908      | 2107.922525    | 1054.464900      | N    | 1101.550977        | 551.279127      | 1084.524428    | 542.765852       | 1083.540412    | 542.273844       | 6  |
| 19 | 2262.992002       | 1131.999639     | 2245.965453    | 1123.486364      | 2244.981437    | 1122.994356      | H    | <b>987.508050</b>  | 494.257663      | 970.481501     | 485.744389       | 969.497485     | 485.252381       | 5  |
| 20 | 2426.055331       | 1213.531303     | 2409.028782    | 1205.018029      | 2408.044766    | 1204.526021      | Y    | <b>850.449138</b>  | 425.728207      | 833.422589     | 417.214933       | 832.438573     | 416.722925       | 4  |
| 21 | 2527.103010       | 1264.055143     | 2510.076461    | 1255.541868      | 2509.092445    | 1255.049860      | T    | 687.385809         | 344.196543      | 670.359260     | 335.683268       | 669.375244     | 335.191260       | 3  |
| 22 | 2966.328336       | 1483.667806     | 2949.301787    | 1475.154531      | 2948.317771    | 1474.662523      | Q    | 586.338130         | 293.672703      | 569.311581     | 285.159429       |                |                  | 2  |
| 23 |                   |                 |                |                  |                |                  | K    | 147.112804         | 74.060040       | 130.086255     | 65.546765        |                |                  | 1  |

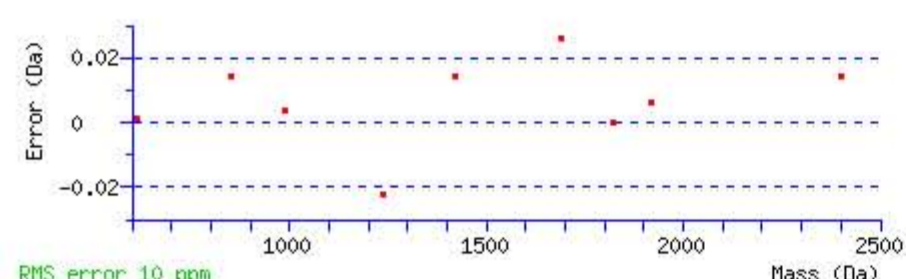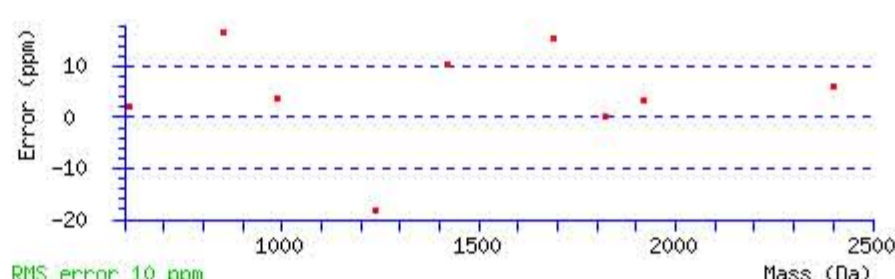

NCBI BLAST search of **WQQGNVFSCSVMEALHNHYTQK**  
(Parameters: blastp, nr protein database, expect=20000, no filter, PAM30)  
Other BLAST [web gateways](#)

### All matches to this query

| Score | Mr(calc):   | Delta     | Sequence                      |
|-------|-------------|-----------|-------------------------------|
| 33.0  | 3111.426590 | -0.007370 | <b>WQQGNVFSCSVMEALHNHYTQK</b> |

# MASCOT Search Results

## Peptide View

MS/MS Fragmentation of **NQVSLTCLVK**

Found in **IGHG1\_HUMAN**, Ig gamma-1 chain C region OS=Homo sapiens GN=IGHG1 PE=1 SV=1

Match to Query 26441: 1471.795828 from(736.905190,2+) rtinseconds(2245) index(61966)

Title: Locus:1.1.1.1693.20 File:"2013-07-02 CLN FXIII 180 min 3rd FT.wiff"

Data file C:\Program Files (x86)\Matrix Science\Mascot Daemon\mgf9 FXIII 180 min 3rd\mascot\_daemon\_merge.mgf

Click mouse within plot area to zoom in by factor of two about that point

Or, Plot from  to  Da

Label all possible matches  Label matches used for scoring



Monoisotopic mass of neutral peptide Mr(calc): 1471.789093

Fixed modifications: Carbamidomethyl (C) (apply to specified residues or termini only)

Variable modifications:

Q2 : Biotin:Thermo-21345 (Q)

Ions Score: 46 Expect: 0.00024

Matches : 22/94 fragment ions using 42 most intense peaks [\(help\)](#)

| #  | b                  | b <sup>++</sup> | b <sup>+</sup>     | b <sup>+++</sup> | b <sup>0</sup>     | b <sup>0++</sup> | Seq. | y                 | y <sup>++</sup>   | y <sup>+</sup>    | y <sup>+++</sup> | y <sup>0</sup>     | y <sup>0++</sup> | #  |
|----|--------------------|-----------------|--------------------|------------------|--------------------|------------------|------|-------------------|-------------------|-------------------|------------------|--------------------|------------------|----|
| 1  | 115.050203         | 58.028740       | 98.023654          | 49.515465        |                    |                  | N    |                   |                   |                   |                  |                    |                  | 10 |
| 2  | <b>554.275529</b>  | 277.641403      | <b>537.248980</b>  | 269.128128       |                    |                  | Q    | 1358.753442       | <b>679.880359</b> | 1341.726893       | 671.367085       | <b>1340.742877</b> | 670.875076       | 9  |
| 3  | <b>653.343943</b>  | 327.175610      | 636.317394         | 318.662335       |                    |                  | V    | <b>919.528116</b> | 460.267696        | 902.501567        | 451.754421       | <b>901.517551</b>  | 451.262413       | 8  |
| 4  | 740.375971         | 370.691623      | 723.349422         | 362.178349       | <b>722.365406</b>  | 361.686341       | S    | <b>820.459702</b> | 410.733489        | 803.433153        | 402.220215       | 802.449137         | 401.728207       | 7  |
| 5  | 853.460035         | 427.233656      | 836.433486         | 418.720381       | 835.449470         | 418.228373       | L    | <b>733.427674</b> | 367.217475        | 716.401125        | 358.704201       | 715.417109         | 358.212193       | 6  |
| 6  | 954.507714         | 477.757495      | 937.481165         | 469.244220       | <b>936.497149</b>  | 468.752212       | T    | <b>620.343610</b> | 310.675443        | 603.317061        | 302.162169       | 602.333045         | 301.670161       | 5  |
| 7  | 1114.538363        | 557.772819      | 1097.511814        | 549.259545       | <b>1096.527798</b> | 548.767537       | C    | <b>519.295931</b> | 260.151604        | 502.269382        | 251.638329       |                    |                  | 4  |
| 8  | <b>1227.622427</b> | 614.314851      | 1210.595878        | 605.801577       | <b>1209.611862</b> | 605.309569       | L    | <b>359.265282</b> | 180.136279        | 342.238733        | 171.623004       |                    |                  | 3  |
| 9  | <b>1326.690841</b> | 663.849058      | <b>1309.664292</b> | 655.335784       | 1308.680276        | 654.843776       | V    | <b>246.181218</b> | 123.594247        | 229.154669        | 115.080973       |                    |                  | 2  |
| 10 |                    |                 |                    |                  |                    |                  | K    | <b>147.112804</b> | 74.060040         | <b>130.086255</b> | 65.546765        |                    |                  | 1  |

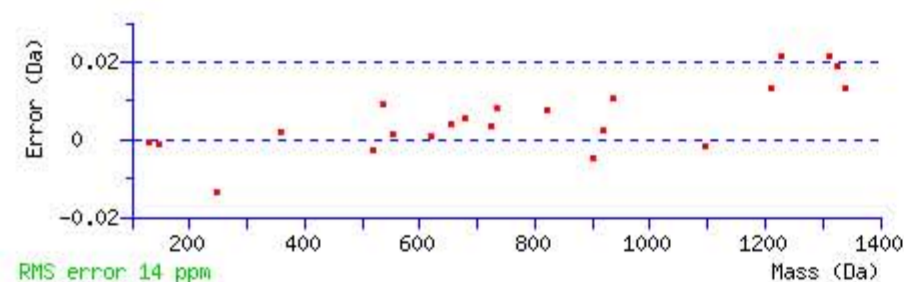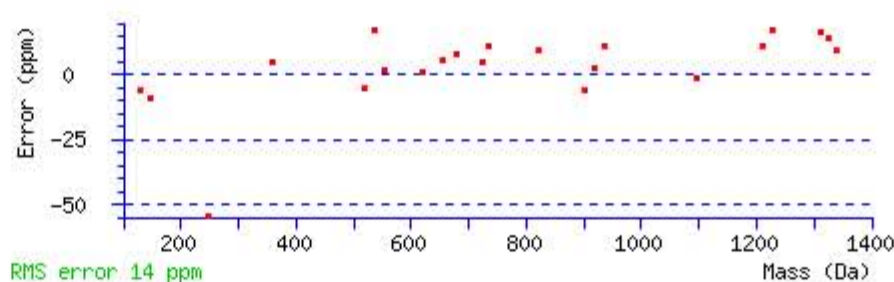

NCBI BLAST search of **NQVSLTCLVK**

(Parameters: blastp, nr protein database, expect=20000, no filter, PAM30)

Other BLAST [web gateways](#)

## All matches to this query

| Score | Mr(calc):   | Delta     | Sequence                      |
|-------|-------------|-----------|-------------------------------|
| 45.5  | 1471.789093 | 0.006735  | <a href="#">NQVSLTCLVK</a>    |
| 6.4   | 1471.803467 | -0.007639 | <a href="#">EKQGPLLDLFGQK</a> |
| 5.1   | 1471.796921 | -0.001093 | <a href="#">YLIAACQHLQKK</a>  |
| 4.1   | 1471.797592 | -0.001764 | <a href="#">KYFWDR AFLVK</a>  |
| 3.8   | 1471.777847 | 0.017981  | <a href="#">QLDMELVSVK</a>    |
| 3.0   | 1471.806808 | -0.010980 | <a href="#">ESLLQIPRIEMK</a>  |
| 2.8   | 1471.793106 | 0.002722  | <a href="#">QPFMVDILAK</a>    |
| 2.5   | 1471.799438 | -0.003610 | <a href="#">EVELDRLRDTVK</a>  |
| 2.2   | 1471.814713 | -0.018885 | <a href="#">RQVIVGTWGESLK</a> |
| 0.1   | 1471.788162 | 0.007666  | <a href="#">ELEAEKLQKEQK</a>  |

# MASCOT Search Results

## Peptide View

MS/MS Fragmentation of **EPQVYTLPPSR**

Found in **IGHG1\_HUMAN**, Ig gamma-1 chain C region OS=Homo sapiens GN=IGHG1 PE=1 SV=1

Match to Query 30487: 1596.834408 from(799.424480,2+) rtinseconds(2036) index(60816)

Title: Locus:1.1.1.1620.15 File:"2013-07-02 CLN FXIII 180 min 3rd FT.wiff"

Data file C:\Program Files (x86)\Matrix Science\Mascot Daemon\mgf\9 FXIII 180 min 3rd\mascot\_daemon\_merge.mgf

Click mouse within plot area to zoom in by factor of two about that point

Or, Plot from  to  Da

Label all possible matches  Label matches used for scoring

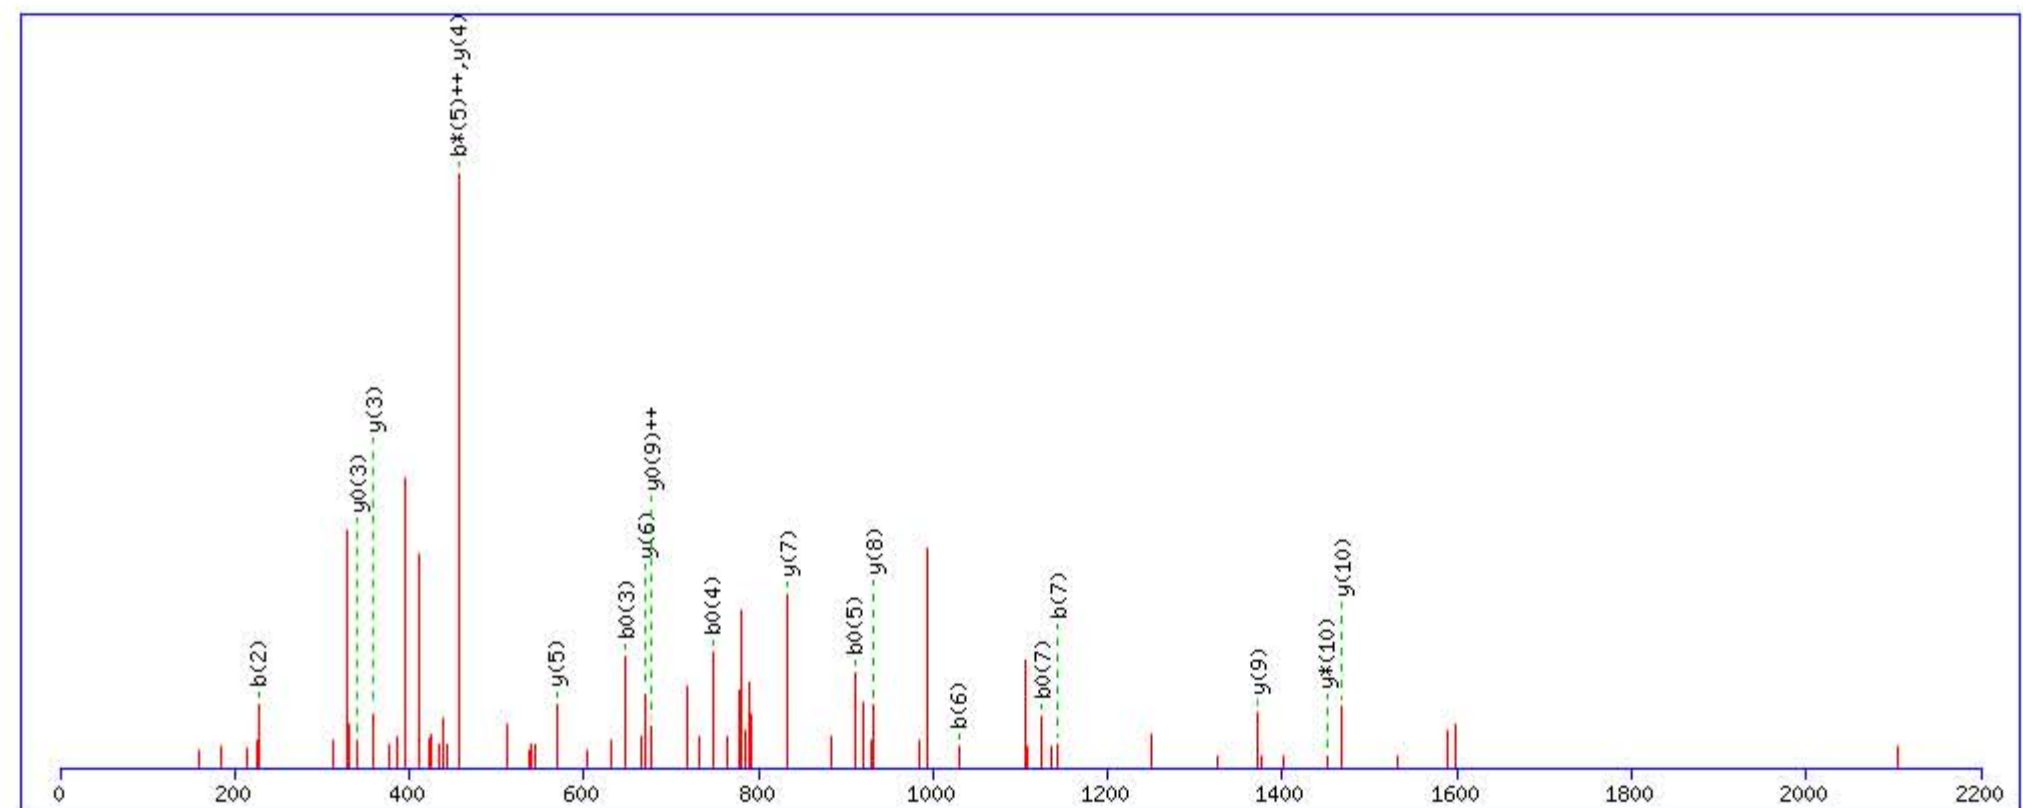

Monoisotopic mass of neutral peptide Mr(calc): 1596.833389

Fixed modifications: Carbamidomethyl (C) (apply to specified residues or termini only)

Variable modifications:

Q3 : Biotin:Thermo-21345 (Q)

Ions Score: 33 Expect: 0.0012

Matches : 19/114 fragment ions using 49 most intense peaks [\(help\)](#)

| #  | b                  | b <sup>++</sup> | b <sup>*</sup> | b <sup>*++</sup>  | b <sup>0</sup>     | b <sup>0++</sup> | Seq. | y                  | y <sup>++</sup> | y <sup>*</sup>     | y <sup>*++</sup> | y <sup>0</sup>    | y <sup>0++</sup>  | #  |
|----|--------------------|-----------------|----------------|-------------------|--------------------|------------------|------|--------------------|-----------------|--------------------|------------------|-------------------|-------------------|----|
| 1  | 130.049869         | 65.528572       |                |                   | 112.039304         | 56.523290        | E    |                    |                 |                    |                  |                   |                   | 11 |
| 2  | <b>227.102633</b>  | 114.054954      |                |                   | 209.092068         | 105.049672       | P    | <b>1468.798084</b> | 734.902680      | <b>1451.771535</b> | 726.389406       | 1450.787519       | 725.897398        | 10 |
| 3  | 666.327959         | 333.667618      | 649.301410     | 325.154343        | <b>648.317394</b>  | 324.662335       | Q    | <b>1371.745320</b> | 686.376298      | 1354.718771        | 677.863024       | 1353.734755       | <b>677.371016</b> | 9  |
| 4  | 765.396373         | 383.201825      | 748.369824     | 374.688550        | <b>747.385808</b>  | 374.196542       | V    | <b>932.519994</b>  | 466.763635      | 915.493445         | 458.250361       | 914.509429        | 457.758353        | 8  |
| 5  | 928.459702         | 464.733489      | 911.433153     | <b>456.220215</b> | <b>910.449137</b>  | 455.728207       | Y    | <b>833.451580</b>  | 417.229428      | 816.425031         | 408.716154       | 815.441015        | 408.224146        | 7  |
| 6  | <b>1029.507381</b> | 515.257329      | 1012.480832    | 506.744054        | 1011.496816        | 506.252046       | T    | <b>670.388251</b>  | 335.697764      | 653.361702         | 327.184489       | 652.377686        | 326.692481        | 6  |
| 7  | <b>1142.591445</b> | 571.799361      | 1125.564896    | 563.286086        | <b>1124.580880</b> | 562.794078       | L    | <b>569.340572</b>  | 285.173924      | 552.314023         | 276.660650       | 551.330007        | 276.168642        | 5  |
| 8  | 1239.644209        | 620.325743      | 1222.617660    | 611.812468        | 1221.633644        | 611.320460       | P    | <b>456.256508</b>  | 228.631892      | 439.229959         | 220.118618       | 438.245943        | 219.626610        | 4  |
| 9  | 1336.696973        | 668.852125      | 1319.670424    | 660.338850        | 1318.686408        | 659.846842       | P    | <b>359.203744</b>  | 180.105510      | 342.177195         | 171.592236       | <b>341.193179</b> | 171.100228        | 3  |
| 10 | 1423.729001        | 712.368139      | 1406.702452    | 703.854864        | 1405.718436        | 703.362856       | S    | 262.150980         | 131.579128      | 245.124431         | 123.065854       | 244.140415        | 122.573846        | 2  |
| 11 |                    |                 |                |                   |                    |                  | R    | 175.118952         | 88.063114       | 158.092403         | 79.549839        |                   |                   | 1  |

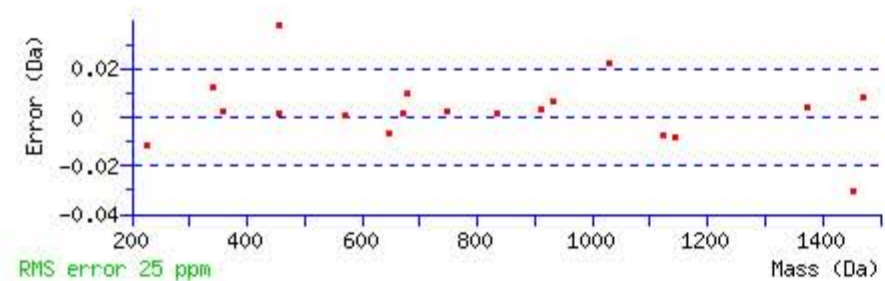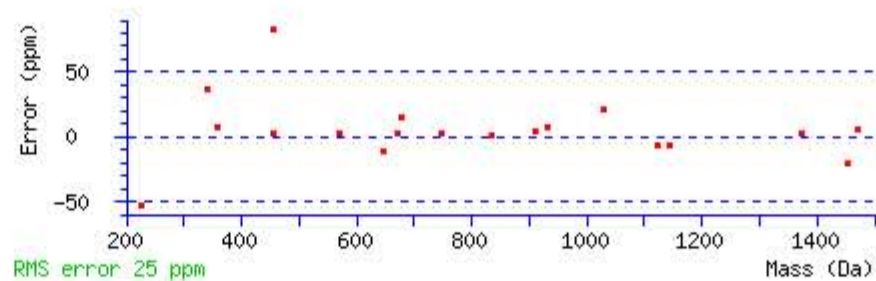

NCBI BLAST search of **EPQVYTLPPSR**

(Parameters: blastp, nr protein database, expect=20000, no filter, PAM30)

Other BLAST [web gateways](#)

All matches to this query

| Score | Mr(calc):   | Delta     | Sequence                      |
|-------|-------------|-----------|-------------------------------|
| 33.3  | 1596.833389 | 0.001019  | <a href="#">EPQVYTLPPSR</a>   |
| 2.3   | 1596.818115 | 0.016293  | <a href="#">QEPEEKVVS NK</a>  |
| 0.7   | 1596.851135 | -0.016727 | <a href="#">LLFHGENEALDKV</a> |

Mascot: <http://www.matrixscience.com/>



# MASCOT Search Results

## Peptide View

MS/MS Fragmentation of **NQVSLTCLVK**

Found in **IGHG1\_HUMAN**, Ig gamma-1 chain C region OS=Homo sapiens GN=IGHG1 PE=1 SV=1

Match to Query 26441: 1471.795828 from(736.905190,2+) rtinseconds(2245) index(61966)

Title: Locus:1.1.1.1693.20 File:"2013-07-02 CLN FXIII 180 min 3rd FT.wiff"

Data file C:\Program Files (x86)\Matrix Science\Mascot Daemon\mgf9 FXIII 180 min 3rd\mascot\_daemon\_merge.mgf

Click mouse within plot area to zoom in by factor of two about that point

Or, Plot from  to  Da

Label all possible matches  Label matches used for scoring



Monoisotopic mass of neutral peptide Mr(calc): 1471.789093

Fixed modifications: Carbamidomethyl (C) (apply to specified residues or termini only)

Variable modifications:

Q2 : Biotin:Thermo-21345 (Q)

Ions Score: 46 Expect: 0.00024

Matches : 22/94 fragment ions using 42 most intense peaks [\(help\)](#)

| #  | b                  | b <sup>++</sup> | b <sup>+</sup>     | b <sup>+++</sup> | b <sup>0</sup>     | b <sup>0++</sup> | Seq. | y                 | y <sup>++</sup>   | y <sup>+</sup>    | y <sup>+++</sup> | y <sup>0</sup>     | y <sup>0++</sup> | #  |
|----|--------------------|-----------------|--------------------|------------------|--------------------|------------------|------|-------------------|-------------------|-------------------|------------------|--------------------|------------------|----|
| 1  | 115.050203         | 58.028740       | 98.023654          | 49.515465        |                    |                  | N    |                   |                   |                   |                  |                    |                  | 10 |
| 2  | <b>554.275529</b>  | 277.641403      | <b>537.248980</b>  | 269.128128       |                    |                  | Q    | 1358.753442       | <b>679.880359</b> | 1341.726893       | 671.367085       | <b>1340.742877</b> | 670.875076       | 9  |
| 3  | <b>653.343943</b>  | 327.175610      | 636.317394         | 318.662335       |                    |                  | V    | <b>919.528116</b> | 460.267696        | 902.501567        | 451.754421       | <b>901.517551</b>  | 451.262413       | 8  |
| 4  | 740.375971         | 370.691623      | 723.349422         | 362.178349       | <b>722.365406</b>  | 361.686341       | S    | <b>820.459702</b> | 410.733489        | 803.433153        | 402.220215       | 802.449137         | 401.728207       | 7  |
| 5  | 853.460035         | 427.233656      | 836.433486         | 418.720381       | 835.449470         | 418.228373       | L    | <b>733.427674</b> | 367.217475        | 716.401125        | 358.704201       | 715.417109         | 358.212193       | 6  |
| 6  | 954.507714         | 477.757495      | 937.481165         | 469.244220       | <b>936.497149</b>  | 468.752212       | T    | <b>620.343610</b> | 310.675443        | 603.317061        | 302.162169       | 602.333045         | 301.670161       | 5  |
| 7  | 1114.538363        | 557.772819      | 1097.511814        | 549.259545       | <b>1096.527798</b> | 548.767537       | C    | <b>519.295931</b> | 260.151604        | 502.269382        | 251.638329       |                    |                  | 4  |
| 8  | <b>1227.622427</b> | 614.314851      | 1210.595878        | 605.801577       | <b>1209.611862</b> | 605.309569       | L    | <b>359.265282</b> | 180.136279        | 342.238733        | 171.623004       |                    |                  | 3  |
| 9  | <b>1326.690841</b> | 663.849058      | <b>1309.664292</b> | 655.335784       | 1308.680276        | 654.843776       | V    | <b>246.181218</b> | 123.594247        | 229.154669        | 115.080973       |                    |                  | 2  |
| 10 |                    |                 |                    |                  |                    |                  | K    | <b>147.112804</b> | 74.060040         | <b>130.086255</b> | 65.546765        |                    |                  | 1  |



NCBI BLAST search of **NQVSLTCLVK**

(Parameters: blastp, nr protein database, expect=20000, no filter, PAM30)

Other BLAST [web gateways](#)

## All matches to this query

| Score | Mr(calc):   | Delta     | Sequence                      |
|-------|-------------|-----------|-------------------------------|
| 45.5  | 1471.789093 | 0.006735  | <a href="#">NQVSLTCLVK</a>    |
| 6.4   | 1471.803467 | -0.007639 | <a href="#">EKQGPLLDLFGQK</a> |
| 5.1   | 1471.796921 | -0.001093 | <a href="#">YLIAACQHLQKK</a>  |
| 4.1   | 1471.797592 | -0.001764 | <a href="#">KYFWDRAFLVK</a>   |
| 3.8   | 1471.777847 | 0.017981  | <a href="#">QLDMELVSVK</a>    |
| 3.0   | 1471.806808 | -0.010980 | <a href="#">ESLLQIPRIEMK</a>  |
| 2.8   | 1471.793106 | 0.002722  | <a href="#">QPFMVDILAK</a>    |
| 2.5   | 1471.799438 | -0.003610 | <a href="#">EVELDRLRDTVK</a>  |
| 2.2   | 1471.814713 | -0.018885 | <a href="#">RQVIVGTWGESLK</a> |
| 0.1   | 1471.788162 | 0.007666  | <a href="#">ELEAEKLQKEQK</a>  |

# MASCOT Search Results

## Peptide View

MS/MS Fragmentation of **EVQLVESGGGLVQPGGSLR**  
 Found in **HV305\_HUMAN**, Ig heavy chain V-III region BRO OS=Homo sapiens PE=1 SV=1

Match to Query 43131: 2192.151792 from(731.724540,3+) rtinseconds(2236) index(33283)  
 Title: Locus:1.1.1.3442.12 File:"2013-07-02 CLN FXIII 180 min 3rd F 3.wiff"  
 Data file C:\Program Files (x86)\Matrix Science\Mascot Daemon\mgf\9 FXIII 180 min 3rd\mascot\_daemon\_merge.mgf

Click mouse within plot area to zoom in by factor of two about that point  
 Or, Plot from  to  Da   
 Label all possible matches  Label matches used for scoring

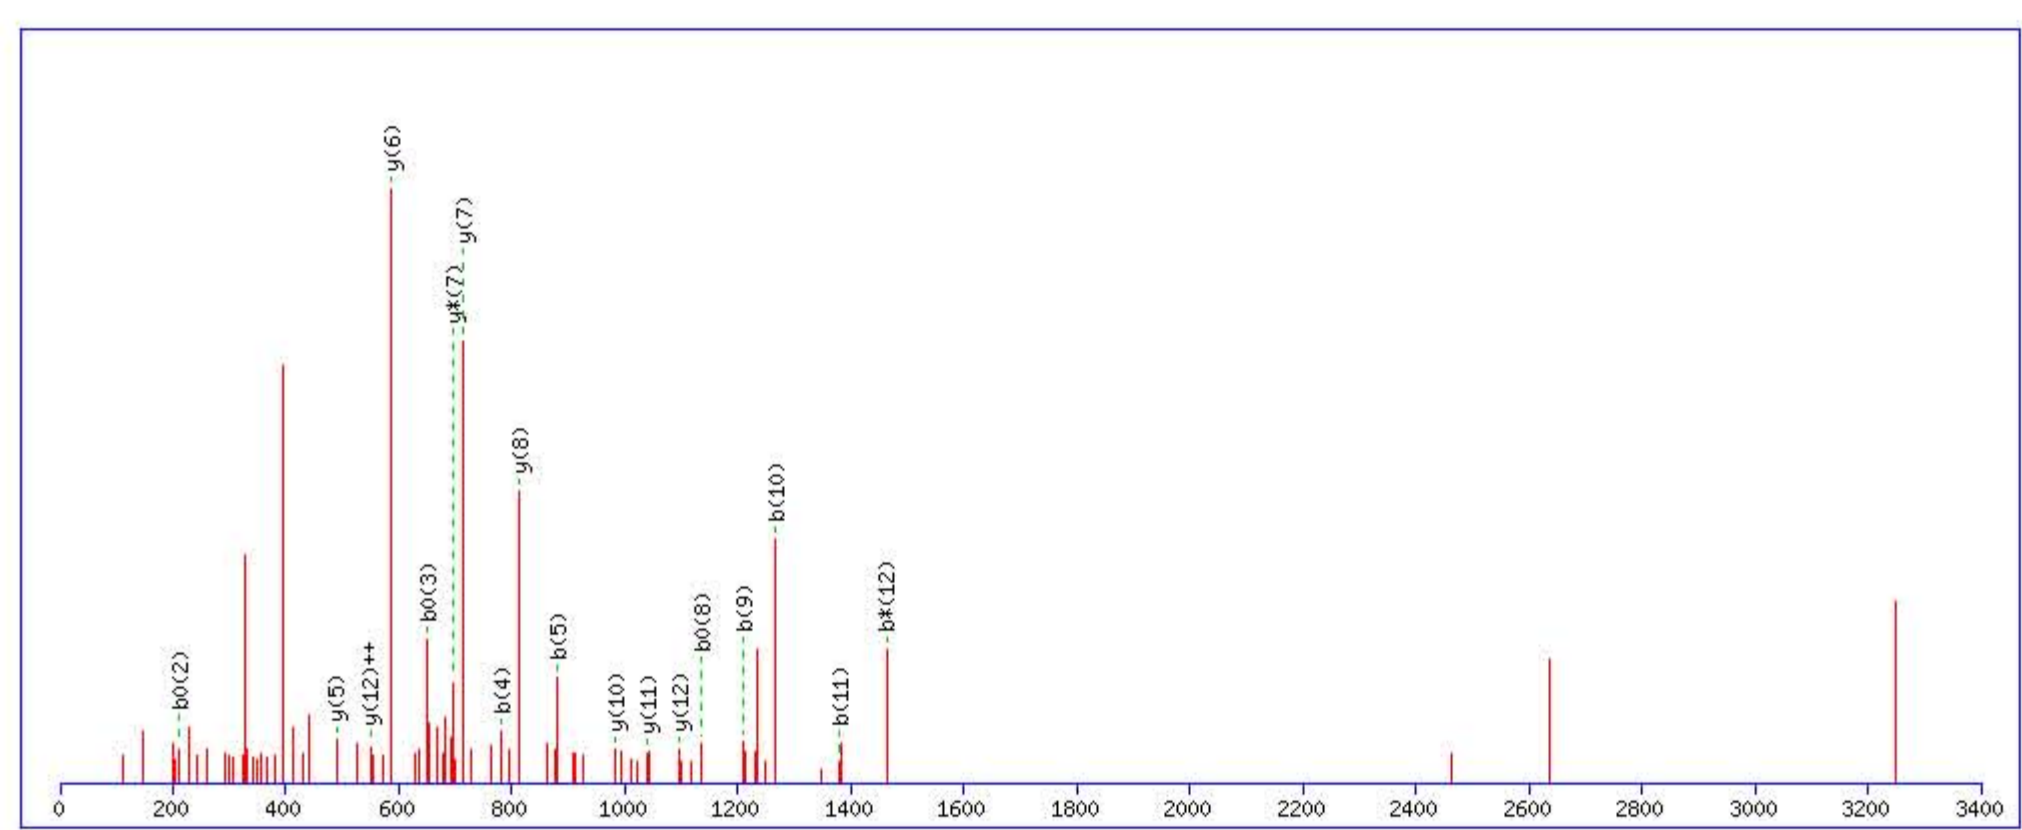

Monoisotopic mass of neutral peptide Mr(calc): 2192.162354  
 Fixed modifications: Carbamidomethyl (C) (apply to specified residues or termini only)  
 Variable modifications:  
 Q3 : Biotin:Thermo-21345 (Q)  
 Ions Score: 30 Expect: 0.0018  
 Matches : 18/208 fragment ions using 39 most intense peaks [\(help\)](#)

| #  | b           | b <sup>++</sup> | b <sup>*</sup> | b <sup>*++</sup> | b <sup>0</sup> | b <sup>0++</sup> | Seq. | y           | y <sup>++</sup> | y <sup>*</sup> | y <sup>*++</sup> | y <sup>0</sup> | y <sup>0++</sup> | #  |
|----|-------------|-----------------|----------------|------------------|----------------|------------------|------|-------------|-----------------|----------------|------------------|----------------|------------------|----|
| 1  | 130.049869  | 65.528572       |                |                  | 112.039304     | 56.523290        | E    |             |                 |                |                  |                |                  | 19 |
| 2  | 229.118283  | 115.062780      |                |                  | 211.107718     | 106.057497       | V    | 2064.127023 | 1032.567149     | 2047.100474    | 1024.053875      | 2046.116458    | 1023.561867      | 18 |
| 3  | 668.343609  | 334.675443      | 651.317060     | 326.162168       | 650.333044     | 325.670160       | Q    | 1965.058609 | 983.032942      | 1948.032060    | 974.519668       | 1947.048044    | 974.027660       | 17 |
| 4  | 781.427673  | 391.217475      | 764.401124     | 382.704200       | 763.417108     | 382.212192       | L    | 1525.833283 | 763.420279      | 1508.806734    | 754.907005       | 1507.822718    | 754.414997       | 16 |
| 5  | 880.496087  | 440.751682      | 863.469538     | 432.238407       | 862.485522     | 431.746399       | V    | 1412.749219 | 706.878248      | 1395.722670    | 698.364973       | 1394.738654    | 697.872965       | 15 |
| 6  | 1009.538680 | 505.272978      | 992.512131     | 496.759704       | 991.528115     | 496.267696       | E    | 1313.680805 | 657.344041      | 1296.654256    | 648.830766       | 1295.670240    | 648.338758       | 14 |
| 7  | 1096.570708 | 548.788992      | 1079.544159    | 540.275718       | 1078.560143    | 539.783709       | S    | 1184.638212 | 592.822744      | 1167.611663    | 584.309470       | 1166.627647    | 583.817462       | 13 |
| 8  | 1153.592172 | 577.299724      | 1136.565623    | 568.786450       | 1135.581607    | 568.294441       | G    | 1097.606184 | 549.306730      | 1080.579635    | 540.793456       | 1079.595619    | 540.301447       | 12 |
| 9  | 1210.613636 | 605.810456      | 1193.587087    | 597.297181       | 1192.603071    | 596.805173       | G    | 1040.584720 | 520.795998      | 1023.558171    | 512.282723       | 1022.574155    | 511.790716       | 11 |
| 10 | 1267.635100 | 634.321188      | 1250.608551    | 625.807913       | 1249.624535    | 625.315905       | G    | 983.563256  | 492.285266      | 966.536707     | 483.771992       | 965.552691     | 483.279984       | 10 |
| 11 | 1380.719164 | 690.863220      | 1363.692615    | 682.349945       | 1362.708599    | 681.857937       | L    | 926.541792  | 463.774534      | 909.515243     | 455.261260       | 908.531227     | 454.769252       | 9  |
| 12 | 1479.787578 | 740.397427      | 1462.761029    | 731.884152       | 1461.777013    | 731.392144       | V    | 813.457728  | 407.232502      | 796.431179     | 398.719228       | 795.447163     | 398.227220       | 8  |
| 13 | 1607.846156 | 804.426716      | 1590.819607    | 795.913441       | 1589.835591    | 795.421433       | Q    | 714.389314  | 357.698295      | 697.362765     | 349.185021       | 696.378749     | 348.693013       | 7  |
| 14 | 1704.898920 | 852.953098      | 1687.872371    | 844.439823       | 1686.888355    | 843.947815       | P    | 586.330736  | 293.669006      | 569.304187     | 285.155732       | 568.320171     | 284.663724       | 6  |
| 15 | 1761.920384 | 881.463830      | 1744.893835    | 872.950555       | 1743.909819    | 872.458547       | G    | 489.277972  | 245.142624      | 472.251423     | 236.629349       | 471.267407     | 236.137341       | 5  |
| 16 | 1818.941848 | 909.974562      | 1801.915299    | 901.461287       | 1800.931283    | 900.969279       | G    | 432.256508  | 216.631892      | 415.229959     | 208.118618       | 414.245943     | 207.626610       | 4  |
| 17 | 1905.973876 | 953.490576      | 1888.947327    | 944.977301       | 1887.963311    | 944.485293       | S    | 375.235044  | 188.121160      | 358.208495     | 179.607886       | 357.224479     | 179.115878       | 3  |
| 18 | 2019.057940 | 1010.032608     | 2002.031391    | 1001.519333      | 2001.047375    | 1001.027325      | L    | 288.203016  | 144.605146      | 271.176467     | 136.091872       |                |                  | 2  |
| 19 |             |                 |                |                  |                |                  | R    | 175.118952  | 88.063114       | 158.092403     | 79.549840        |                |                  | 1  |

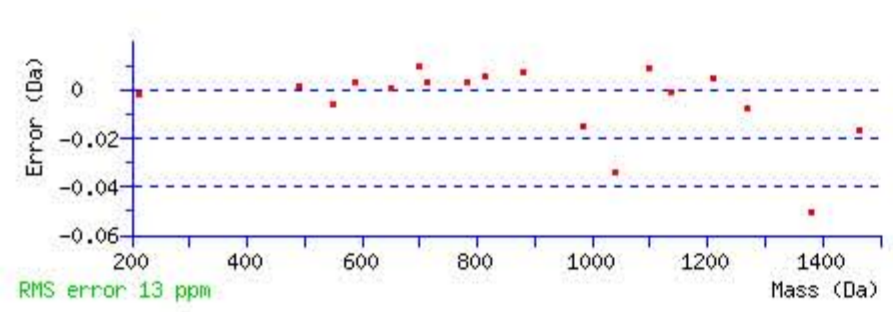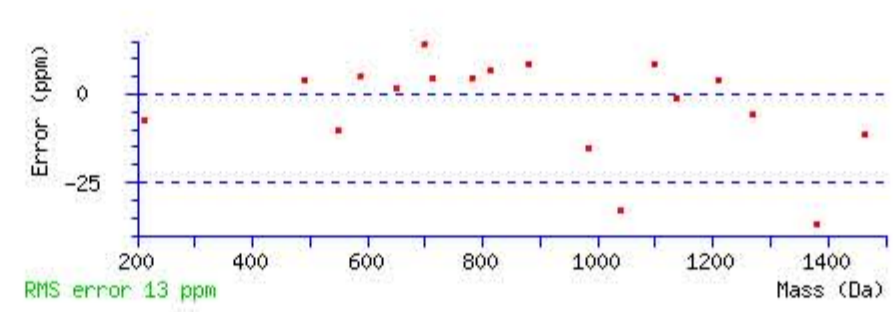

NCBI BLAST search of **EVQLVESGGGLVQPGGSLR**  
 (Parameters: blastp, nr protein database, expect=20000, no filter, PAM30)  
 Other BLAST [web gateways](#)

### All matches to this query

| Score | Mr(calc):   | Delta     | Sequence                            |
|-------|-------------|-----------|-------------------------------------|
| 30.4  | 2192.162354 | -0.010562 | <a href="#">EVQLVESGGGLVQPGGSLR</a> |
| 1.0   | 2192.131516 | 0.020276  | <a href="#">CRQQRQQQK</a>           |
| 1.0   | 2192.131516 | 0.020276  | <a href="#">CRQQRQQQK</a>           |
| 1.0   | 2192.131516 | 0.020276  | <a href="#">CRQQRQQQK</a>           |
| 1.0   | 2192.138031 | 0.013761  | <a href="#">NQQTNDRKQK</a>          |
| 0.2   | 2192.180908 | -0.029116 | <a href="#">IEEERLRLEQQK</a>        |

# MASCOT Search Results

## Peptide View

MS/MS Fragmentation of **VYACEVTHQGLSSPVTK**

Found in **IGKC\_HUMAN**, Ig kappa chain C region OS=Homo sapiens GN=IGKC PE=1 SV=1

Match to Query 43031: 2186.080152 from(729.700660,3+) rtinseconds(1798) index(30587)

Title: Locus:1.1.1.3289.13 File:"2013-07-02 CLN FXIII 180 min 3rd F 3.wiff"

Data file C:\Program Files (x86)\Matrix Science\Mascot Daemon\mgf\9 FXIII 180 min 3rd\mascot\_daemon\_merge.mgf

Click mouse within plot area to zoom in by factor of two about that point

Or, Plot from  to  Da

Label all possible matches  Label matches used for scoring

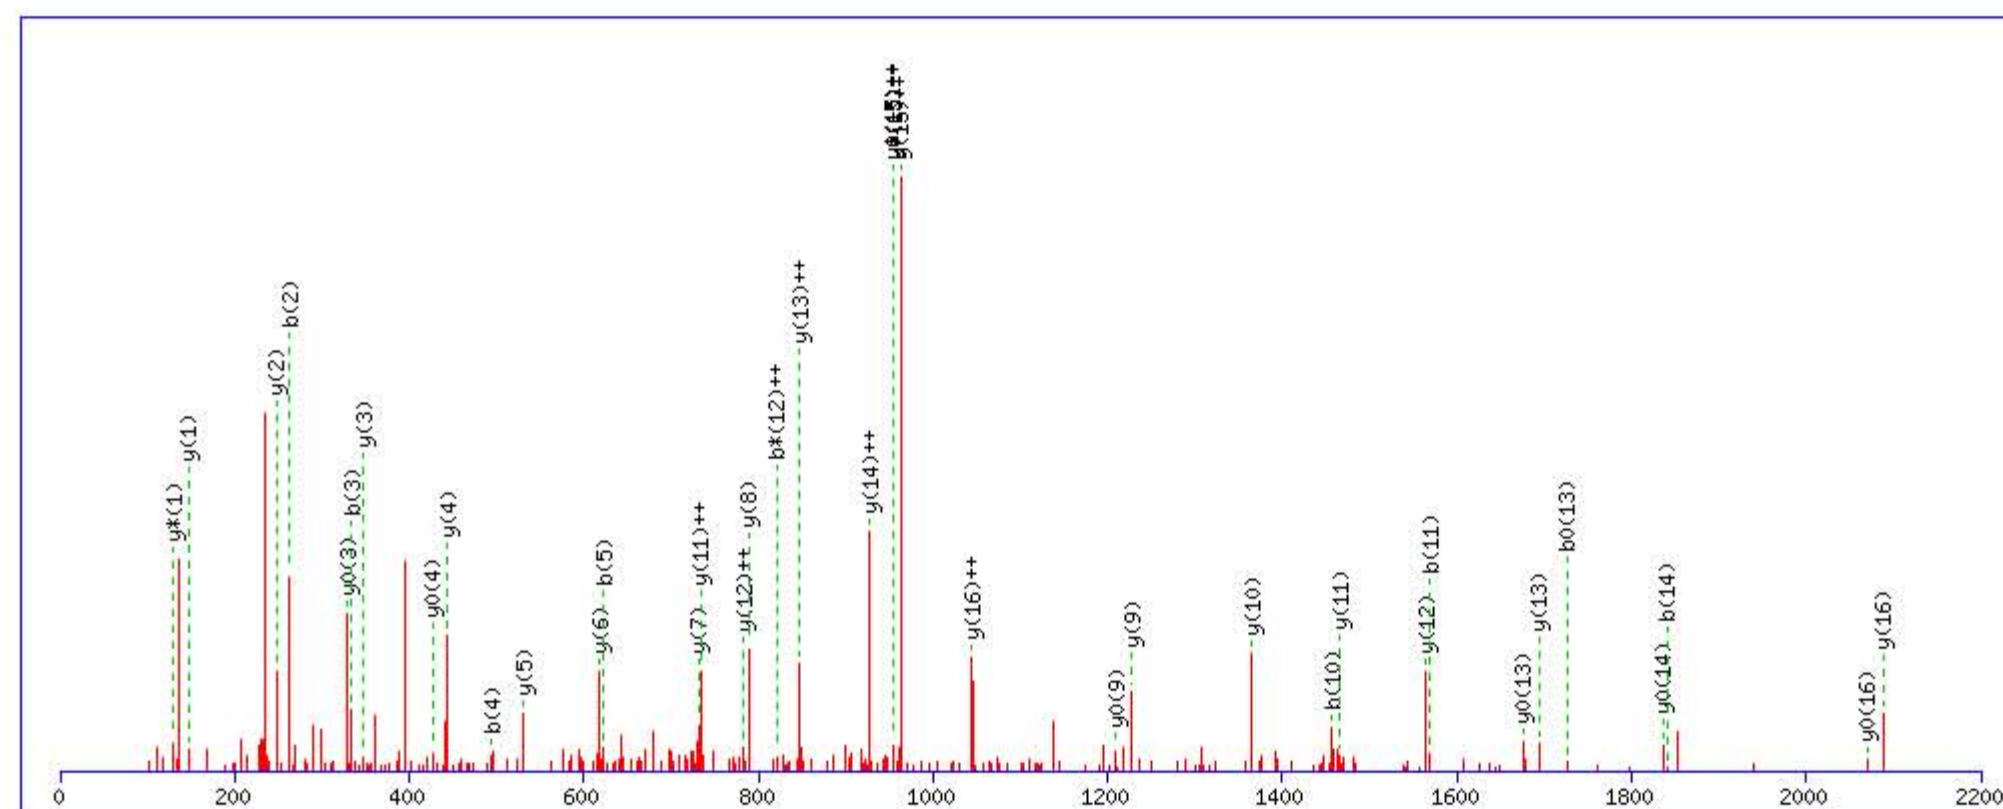

Monoisotopic mass of neutral peptide Mr(calc): 2186.086411

Fixed modifications: Carbamidomethyl (C) (apply to specified residues or termini only)

Variable modifications:

Q9 : Biotin:Thermo-21345 (Q)

Ions Score: 58 Expect: 4.2e-005

Matches : 38/166 fragment ions using 105 most intense peaks [\(help\)](#)

| #  | b                  | b <sup>++</sup> | b <sup>*</sup> | b <sup>*++</sup>  | b <sup>0</sup>     | b <sup>0++</sup> | Seq. | y                  | y <sup>++</sup>    | y <sup>*</sup>    | y <sup>*++</sup>  | y <sup>0</sup>     | y <sup>0++</sup>  | #  |
|----|--------------------|-----------------|----------------|-------------------|--------------------|------------------|------|--------------------|--------------------|-------------------|-------------------|--------------------|-------------------|----|
| 1  | 100.075690         | 50.541483       |                |                   |                    |                  | V    |                    |                    |                   |                   |                    |                   | 17 |
| 2  | <b>263.139019</b>  | 132.073148      |                |                   |                    |                  | Y    | <b>2088.025261</b> | <b>1044.516268</b> | 2070.998712       | 1036.002994       | <b>2070.014696</b> | 1035.510986       | 16 |
| 3  | <b>334.176133</b>  | 167.591704      |                |                   |                    |                  | A    | 1924.961932        | <b>962.984604</b>  | 1907.935383       | <b>954.471330</b> | 1906.951367        | <b>953.979322</b> | 15 |
| 4  | <b>494.206782</b>  | 247.607029      |                |                   |                    |                  | C    | 1853.924818        | <b>927.466047</b>  | 1836.898269       | 918.952773        | <b>1835.914253</b> | 918.460765        | 14 |
| 5  | <b>623.249375</b>  | 312.128326      |                |                   | 605.238810         | 303.123043       | E    | <b>1693.894169</b> | <b>847.450723</b>  | 1676.867620       | 838.937448        | <b>1675.883604</b> | 838.445440        | 13 |
| 6  | 722.317789         | 361.662533      |                |                   | 704.307224         | 352.657250       | V    | <b>1564.851576</b> | <b>782.929426</b>  | 1547.825027       | 774.416152        | 1546.841011        | 773.924144        | 12 |
| 7  | 823.365468         | 412.186372      |                |                   | 805.354903         | 403.181090       | T    | <b>1465.783162</b> | <b>733.395219</b>  | 1448.756613       | 724.881945        | 1447.772597        | 724.389937        | 11 |
| 8  | 960.424380         | 480.715828      |                |                   | 942.413815         | 471.710546       | H    | <b>1364.735483</b> | 682.871380         | 1347.708934       | 674.358105        | 1346.724918        | 673.866097        | 10 |
| 9  | 1399.649706        | 700.328491      | 1382.623157    | 691.815217        | 1381.639141        | 691.323208       | Q    | <b>1227.676571</b> | 614.341924         | 1210.650022       | 605.828649        | <b>1209.666006</b> | 605.336641        | 9  |
| 10 | <b>1456.671170</b> | 728.839223      | 1439.644621    | 720.325948        | 1438.660605        | 719.833940       | G    | <b>788.451245</b>  | 394.729261         | 771.424696        | 386.215986        | 770.440680         | 385.723978        | 8  |
| 11 | <b>1569.755234</b> | 785.381255      | 1552.728685    | 776.867980        | 1551.744669        | 776.375972       | L    | <b>731.429781</b>  | 366.218529         | 714.403232        | 357.705254        | 713.419216         | 357.213246        | 7  |
| 12 | 1656.787262        | 828.897269      | 1639.760713    | <b>820.383994</b> | 1638.776697        | 819.891986       | S    | <b>618.345717</b>  | 309.676497         | 601.319168        | 301.163222        | 600.335152         | 300.671214        | 6  |
| 13 | 1743.819290        | 872.413283      | 1726.792741    | 863.900009        | <b>1725.808725</b> | 863.408000       | S    | <b>531.313689</b>  | 266.160483         | 514.287140        | 257.647208        | 513.303124         | 257.155200        | 5  |
| 14 | <b>1840.872054</b> | 920.939665      | 1823.845505    | 912.426391        | 1822.861489        | 911.934382       | P    | <b>444.281661</b>  | 222.644469         | 427.255112        | 214.131194        | <b>426.271096</b>  | 213.639186        | 4  |
| 15 | 1939.940468        | 970.473872      | 1922.913919    | 961.960598        | 1921.929903        | 961.468590       | V    | <b>347.228897</b>  | 174.118087         | 330.202348        | 165.604812        | <b>329.218332</b>  | 165.112804        | 3  |
| 16 | 2040.988147        | 1020.997712     | 2023.961598    | 1012.484437       | 2022.977582        | 1011.992429      | T    | <b>248.160483</b>  | 124.583880         | 231.133934        | 116.070605        | 230.149918         | 115.578597        | 2  |
| 17 |                    |                 |                |                   |                    |                  | K    | <b>147.112804</b>  | 74.060040          | <b>130.086255</b> | 65.546766         |                    |                   | 1  |

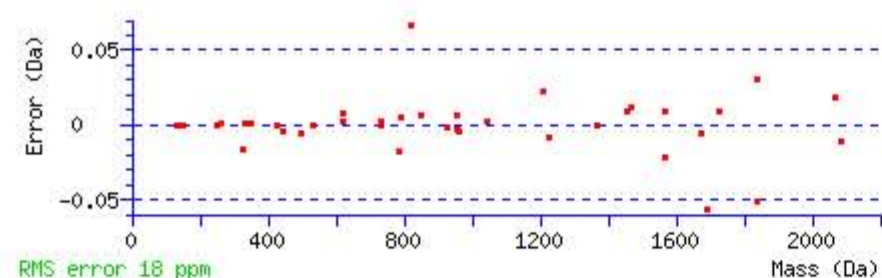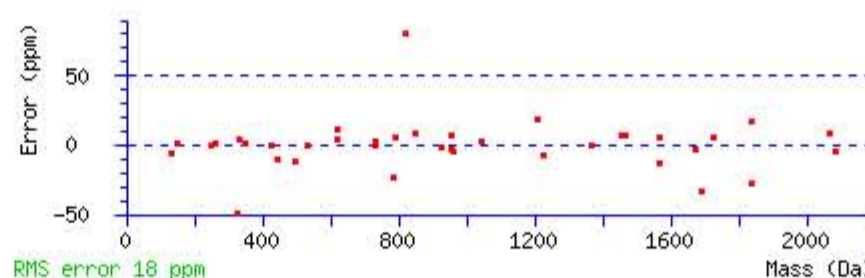

NCBI BLAST search of [VYACEVTHQGLSSPVTK](#)

(Parameters: blastp, nr protein database, expect=20000, no filter, PAM30)

Other BLAST [web gateways](#)

All matches to this query

| Score | Mr(calc):   | Delta     | Sequence                          |
|-------|-------------|-----------|-----------------------------------|
| 58.1  | 2186.086411 | -0.006259 | <a href="#">VYACEVTHQGLSSPVTK</a> |

Mascot: <http://www.matrixscience.com/>

# MASCOT Search Results

## Peptide View

MS/MS Fragmentation of **TVAAPSVFIFPPSDEQLK**

Found in **IGKC\_HUMAN**, Ig kappa chain C region OS=Homo sapiens GN=IGKC PE=1 SV=1

Match to Query 44190: 2256.185472 from(753.069100,3+) rtinseconds(2683) index(35694)

Title: Locus:1.1.1.3597.9 File:"2013-07-02 CLN FXIII 180 min 3rd F 3.wiff"

Data file C:\Program Files (x86)\Matrix Science\Mascot Daemon\mgf\9 FXIII 180 min 3rd\mascot\_daemon\_merge.mgf

Click mouse within plot area to zoom in by factor of two about that point

Or, Plot from  to  Da

Label all possible matches  Label matches used for scoring

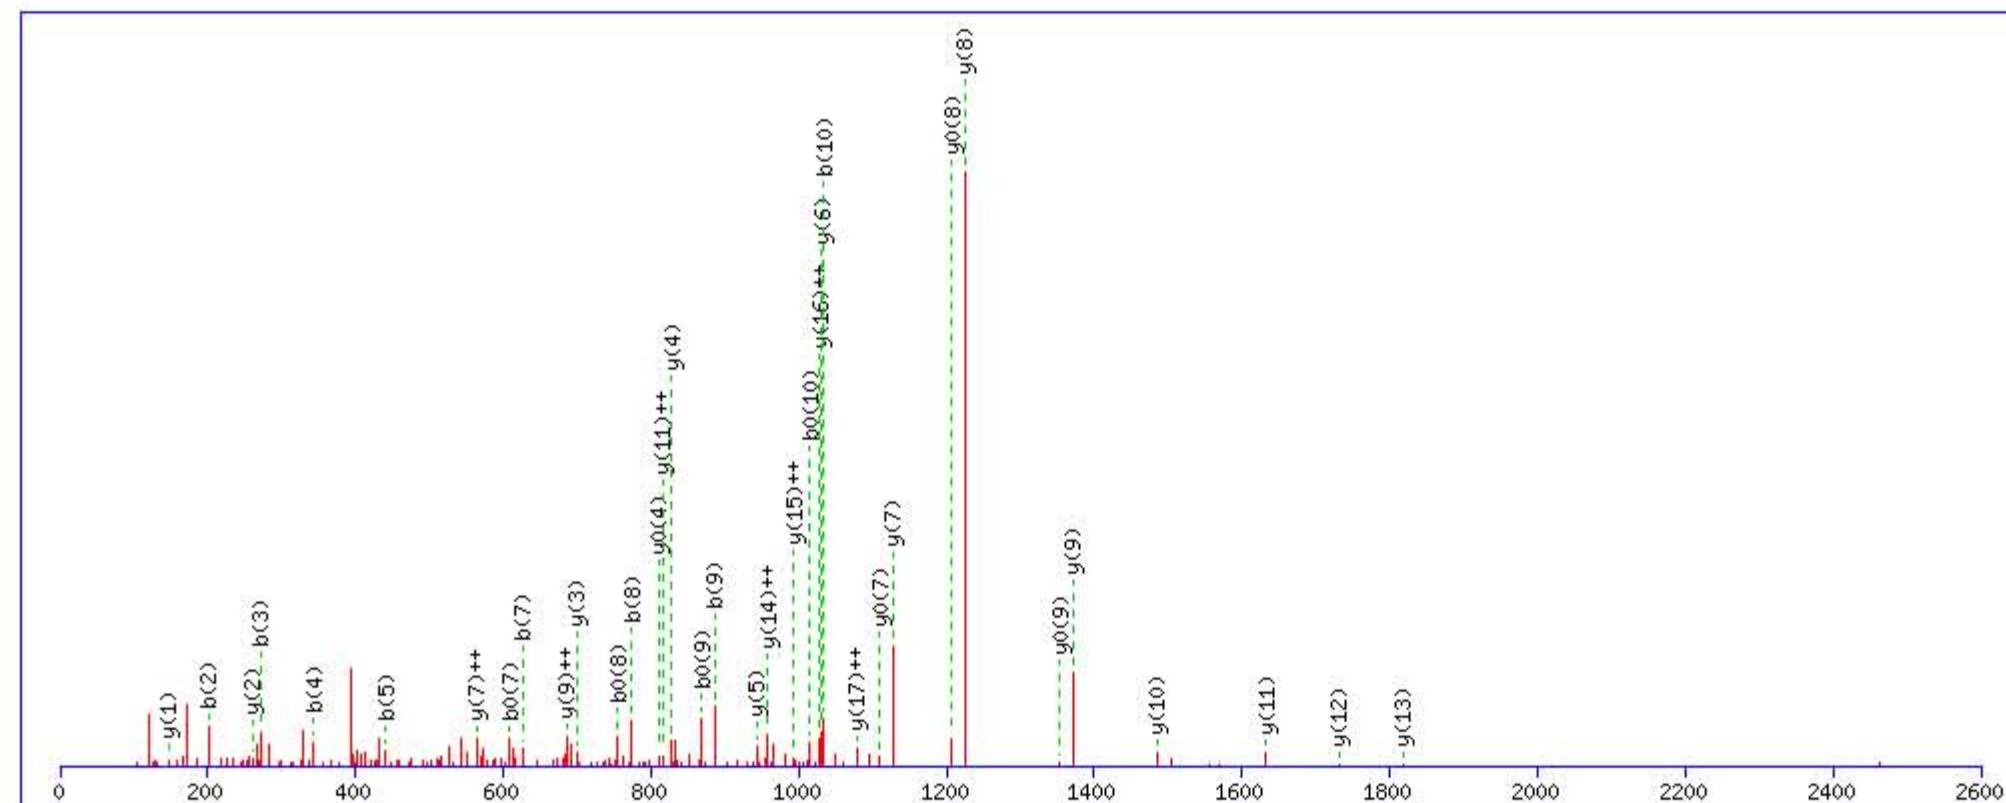

Monoisotopic mass of neutral peptide Mr(calc): 2256.186432

Fixed modifications: Carbamidomethyl (C) (apply to specified residues or termini only)

Variable modifications:

Q16 : Biotin:Thermo-21345 (Q)

Ions Score: 54 Expect: 8e-006

Matches : 36/168 fragment ions using 97 most intense peaks [\(help\)](#)

| #  | b                  | b <sup>++</sup> | b <sup>+</sup> | b <sup>+++</sup> | b <sup>0</sup>     | b <sup>0++</sup> | Seq. | y                  | y <sup>++</sup>    | y <sup>+</sup> | y <sup>+++</sup> | y <sup>0</sup>     | y <sup>0++</sup> | #  |
|----|--------------------|-----------------|----------------|------------------|--------------------|------------------|------|--------------------|--------------------|----------------|------------------|--------------------|------------------|----|
| 1  | 102.054955         | 51.531116       |                |                  | 84.044390          | 42.525833        | T    |                    |                    |                |                  |                    |                  | 18 |
| 2  | <b>201.123369</b>  | 101.065322      |                |                  | 183.112804         | 92.060040        | V    | 2156.146026        | <b>1078.576651</b> | 2139.119477    | 1070.063377      | 2138.135461        | 1069.571369      | 17 |
| 3  | <b>272.160483</b>  | 136.583879      |                |                  | 254.149918         | 127.578597       | A    | 2057.077612        | <b>1029.042444</b> | 2040.051063    | 1020.529170      | 2039.067047        | 1020.037162      | 16 |
| 4  | <b>343.197597</b>  | 172.102437      |                |                  | 325.187032         | 163.097154       | A    | 1986.040498        | <b>993.523887</b>  | 1969.013949    | 985.010613       | 1968.029933        | 984.518605       | 15 |
| 5  | <b>440.250361</b>  | 220.628819      |                |                  | 422.239796         | 211.623536       | P    | 1915.003384        | <b>958.005330</b>  | 1897.976835    | 949.492056       | 1896.992819        | 949.000048       | 14 |
| 6  | 527.282389         | 264.144833      |                |                  | 509.271824         | 255.139550       | S    | <b>1817.950620</b> | 909.478948         | 1800.924071    | 900.965674       | 1799.940055        | 900.473666       | 13 |
| 7  | <b>626.350803</b>  | 313.679040      |                |                  | <b>608.340238</b>  | 304.673757       | V    | <b>1730.918592</b> | 865.962934         | 1713.892043    | 857.449660       | 1712.908027        | 856.957652       | 12 |
| 8  | <b>773.419217</b>  | 387.213247      |                |                  | <b>755.408652</b>  | 378.207964       | F    | <b>1631.850178</b> | <b>816.428727</b>  | 1614.823629    | 807.915453       | 1613.839613        | 807.423445       | 11 |
| 9  | <b>886.503281</b>  | 443.755279      |                |                  | <b>868.492716</b>  | 434.749996       | I    | <b>1484.781764</b> | 742.894520         | 1467.755215    | 734.381246       | 1466.771199        | 733.889238       | 10 |
| 10 | <b>1033.571695</b> | 517.289486      |                |                  | <b>1015.561130</b> | 508.284203       | F    | <b>1371.697700</b> | <b>686.352488</b>  | 1354.671151    | 677.839214       | <b>1353.687135</b> | 677.347206       | 9  |
| 11 | 1130.624459        | 565.815868      |                |                  | 1112.613894        | 556.810585       | P    | <b>1224.629286</b> | 612.818281         | 1207.602737    | 604.305007       | <b>1206.618721</b> | 603.812999       | 8  |
| 12 | 1227.677223        | 614.342250      |                |                  | 1209.666658        | 605.336967       | P    | <b>1127.576522</b> | <b>564.291899</b>  | 1110.549973    | 555.778625       | <b>1109.565957</b> | 555.286617       | 7  |
| 13 | 1314.709251        | 657.858264      |                |                  | 1296.698686        | 648.852981       | S    | <b>1030.523758</b> | 515.765517         | 1013.497209    | 507.252243       | 1012.513193        | 506.760235       | 6  |
| 14 | 1429.736194        | 715.371735      |                |                  | 1411.725629        | 706.366453       | D    | <b>943.491730</b>  | 472.249503         | 926.465181     | 463.736229       | 925.481165         | 463.244221       | 5  |
| 15 | 1558.778787        | 779.893032      |                |                  | 1540.768222        | 770.887749       | E    | <b>828.464787</b>  | 414.736032         | 811.438238     | 406.222757       | <b>810.454222</b>  | 405.730749       | 4  |
| 16 | 1998.004113        | 999.505695      | 1980.977564    | 990.992420       | 1979.993548        | 990.500412       | Q    | <b>699.422194</b>  | 350.214735         | 682.395645     | 341.701461       |                    |                  | 3  |
| 17 | 2111.088177        | 1056.047727     | 2094.061628    | 1047.534452      | 2093.077612        | 1047.042444      | L    | <b>260.196868</b>  | 130.602072         | 243.170319     | 122.088798       |                    |                  | 2  |
| 18 |                    |                 |                |                  |                    |                  | K    | <b>147.112804</b>  | 74.060040          | 130.086255     | 65.546765        |                    |                  | 1  |

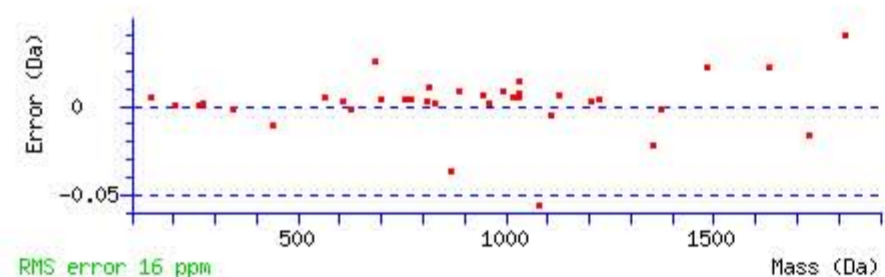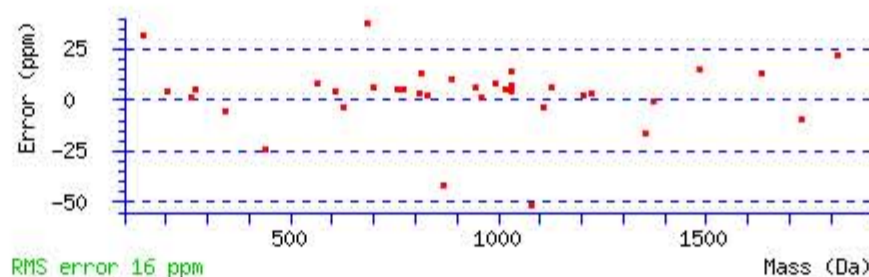

NCBI BLAST search of [TVAAPSVFIFPPSDEQLK](#)

(Parameters: blastp, nr protein database, expect=20000, no filter, PAM30)

Other BLAST [web gateways](#)

All matches to this query

| Score | Mr(calc):   | Delta     | Sequence                              |
|-------|-------------|-----------|---------------------------------------|
| 54.5  | 2256.186432 | -0.000960 | <a href="#">TVAAPSVFIFPPSDEQLK</a>    |
| 0.1   | 2256.171860 | 0.013612  | <a href="#">QVVCDLGNPMKAGTQLLAGLR</a> |

Mascot: <http://www.matrixscience.com/>

# MASCOT Search Results

## Peptide View

MS/MS Fragmentation of **SYSCQVTHEGSTVEK**

Found in **I<sub>GLL5</sub>\_HUMAN**, Immunoglobulin lambda-like polypeptide 5 OS=Homo sapiens GN=IGLL5 PE=2 SV=2

Match to Query 40228: 2021.908932 from(674.976920,3+) rtinseconds(1453) index(15568)

Title: Locus:1.1.1.3071.7 File:"2013-07-02 CLN FXIII 180 min 3rd F 2.wiff"

Data file C:\Program Files (x86)\Matrix Science\Mascot Daemon\mgf9 FXIII 180 min 3rd\mascot\_daemon\_merge.mgf

Click mouse within plot area to zoom in by factor of two about that point

Or, Plot from  to  Da

Label all possible matches  Label matches used for scoring

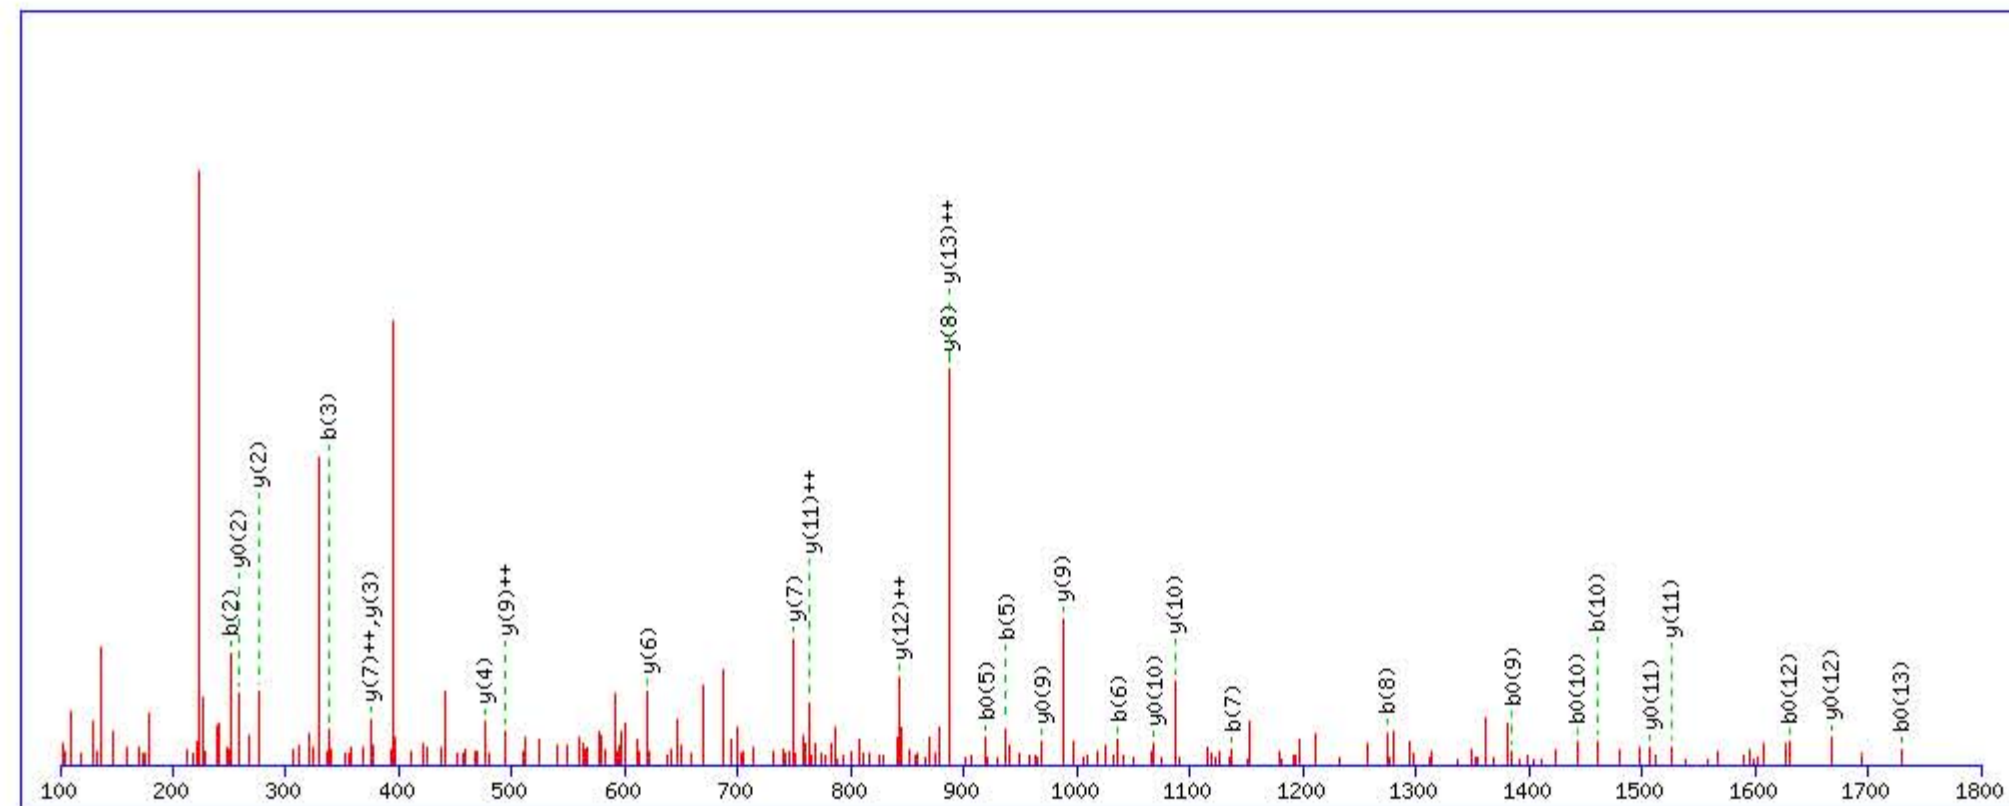

Monoisotopic mass of neutral peptide Mr(calc): 2021.918671

Fixed modifications: Carbamidomethyl (C) (apply to specified residues or termini only)

Variable modifications:

Q5 : Biotin:Thermo-21345 (Q)

Ions Score: 35 Expect: 0.0026

Matches : 31/158 fragment ions using 65 most intense peaks [\(help\)](#)

| #  | b                  | b <sup>++</sup> | b <sup>+</sup> | b <sup>+++</sup> | b <sup>0</sup>     | b <sup>0++</sup> | Seq. | y                  | y <sup>++</sup>   | y <sup>+</sup> | y <sup>+++</sup> | y <sup>0</sup>     | y <sup>0++</sup> | #  |
|----|--------------------|-----------------|----------------|------------------|--------------------|------------------|------|--------------------|-------------------|----------------|------------------|--------------------|------------------|----|
| 1  | 88.039304          | 44.523290       |                |                  | 70.028739          | 35.518008        | S    |                    |                   |                |                  |                    |                  | 15 |
| 2  | <b>251.102633</b>  | 126.054954      |                |                  | 233.092068         | 117.049672       | Y    | 1935.893912        | 968.450594        | 1918.867363    | 959.937320       | 1917.883347        | 959.445312       | 14 |
| 3  | <b>338.134661</b>  | 169.570968      |                |                  | 320.124096         | 160.565686       | S    | 1772.830583        | <b>886.918930</b> | 1755.804034    | 878.405655       | 1754.820018        | 877.913647       | 13 |
| 4  | 498.165310         | 249.586293      |                |                  | 480.154745         | 240.581011       | C    | 1685.798555        | <b>843.402916</b> | 1668.772006    | 834.889641       | <b>1667.787990</b> | 834.397633       | 12 |
| 5  | <b>937.390636</b>  | 469.198956      | 920.364087     | 460.685682       | <b>919.380071</b>  | 460.193674       | Q    | <b>1525.767906</b> | <b>763.387591</b> | 1508.741357    | 754.874317       | <b>1507.757341</b> | 754.382309       | 11 |
| 6  | <b>1036.459050</b> | 518.733163      | 1019.432501    | 510.219889       | 1018.448485        | 509.727881       | V    | <b>1086.542580</b> | 543.774928        | 1069.516031    | 535.261654       | <b>1068.532015</b> | 534.769646       | 10 |
| 7  | <b>1137.506729</b> | 569.257003      | 1120.480180    | 560.743728       | 1119.496164        | 560.251720       | T    | <b>987.474166</b>  | <b>494.240721</b> | 970.447617     | 485.727447       | <b>969.463601</b>  | 485.235439       | 9  |
| 8  | <b>1274.565641</b> | 637.786459      | 1257.539092    | 629.273184       | 1256.555076        | 628.781176       | H    | <b>886.426487</b>  | 443.716882        | 869.399938     | 435.203607       | 868.415922         | 434.711599       | 8  |
| 9  | 1403.608234        | 702.307755      | 1386.581685    | 693.794481       | <b>1385.597669</b> | 693.302473       | E    | <b>749.367575</b>  | <b>375.187426</b> | 732.341026     | 366.674151       | 731.357010         | 366.182143       | 7  |
| 10 | <b>1460.629698</b> | 730.818487      | 1443.603149    | 722.305213       | <b>1442.619133</b> | 721.813204       | G    | <b>620.324982</b>  | 310.666129        | 603.298433     | 302.152855       | 602.314417         | 301.660847       | 6  |
| 11 | 1547.661726        | 774.334501      | 1530.635177    | 765.821227       | 1529.651161        | 765.329219       | S    | 563.303518         | 282.155397        | 546.276969     | 273.642123       | 545.292953         | 273.150115       | 5  |
| 12 | 1648.709405        | 824.858341      | 1631.682856    | 816.345066       | <b>1630.698840</b> | 815.853058       | T    | <b>476.271490</b>  | 238.639383        | 459.244941     | 230.126109       | 458.260925         | 229.634101       | 4  |
| 13 | 1747.777819        | 874.392548      | 1730.751270    | 865.879273       | <b>1729.767254</b> | 865.387265       | V    | <b>375.223811</b>  | 188.115544        | 358.197262     | 179.602269       | 357.213246         | 179.110261       | 3  |
| 14 | 1876.820412        | 938.913844      | 1859.793863    | 930.400570       | 1858.809847        | 929.908562       | E    | <b>276.155397</b>  | 138.581337        | 259.128848     | 130.068062       | <b>258.144832</b>  | 129.576054       | 2  |
| 15 |                    |                 |                |                  |                    |                  | K    | 147.112804         | 74.060040         | 130.086255     | 65.546765        |                    |                  | 1  |

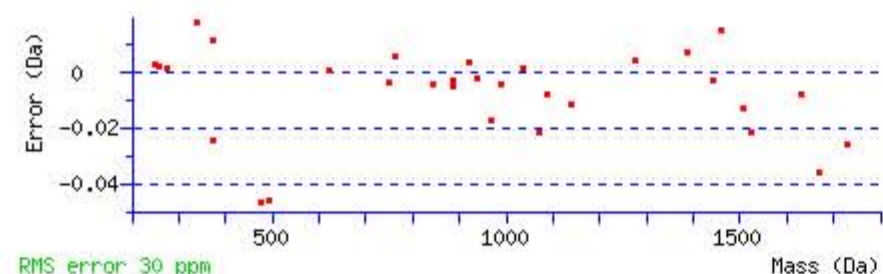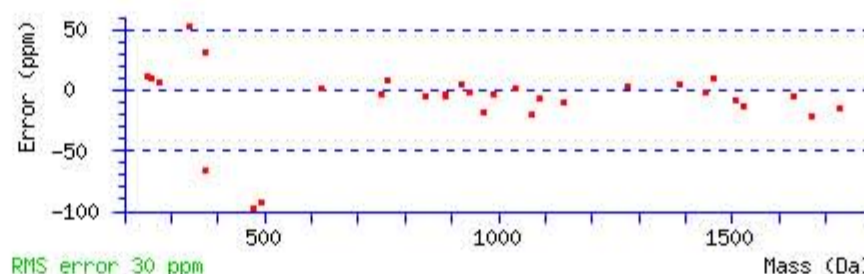

NCBI BLAST search of [SYSCQVTHEGSTVEK](#)

(Parameters: blastp, nr protein database, expect=20000, no filter, PAM30)

Other BLAST [web gateways](#)

All matches to this query

| Score | Mr(calc):   | Delta     | Sequence                        |
|-------|-------------|-----------|---------------------------------|
| 35.4  | 2021.918671 | -0.009739 | <a href="#">SYSCQVTHEGSTVEK</a> |

Mascot: <http://www.matrixscience.com/>

# MASCOT SEARCH RESULTS

## Peptide View

MS/MS Fragmentation of **QIQVSWLR**

Found in **IGHM\_HUMAN**, Ig mu chain C region OS=Homo sapiens GN=IGHM PE=1 SV=3

Match to Query 21116: 1339.740388 from(670.877470,2+) rtinseconds(2362) index(33882)

Title: Locus:1.1.1.3486.9 File:"2013-07-02 CLN FXIII 180 min 3rd F 3.wiff"

Data file C:\Program Files (x86)\Matrix Science\Mascot Daemon\mgf9 FXIII 180 min 3rd\mascot\_daemon\_merge.mgf

Click mouse within plot area to zoom in by factor of two about that point

Or, Plot from  to  Da

Label all possible matches  Label matches used for scoring

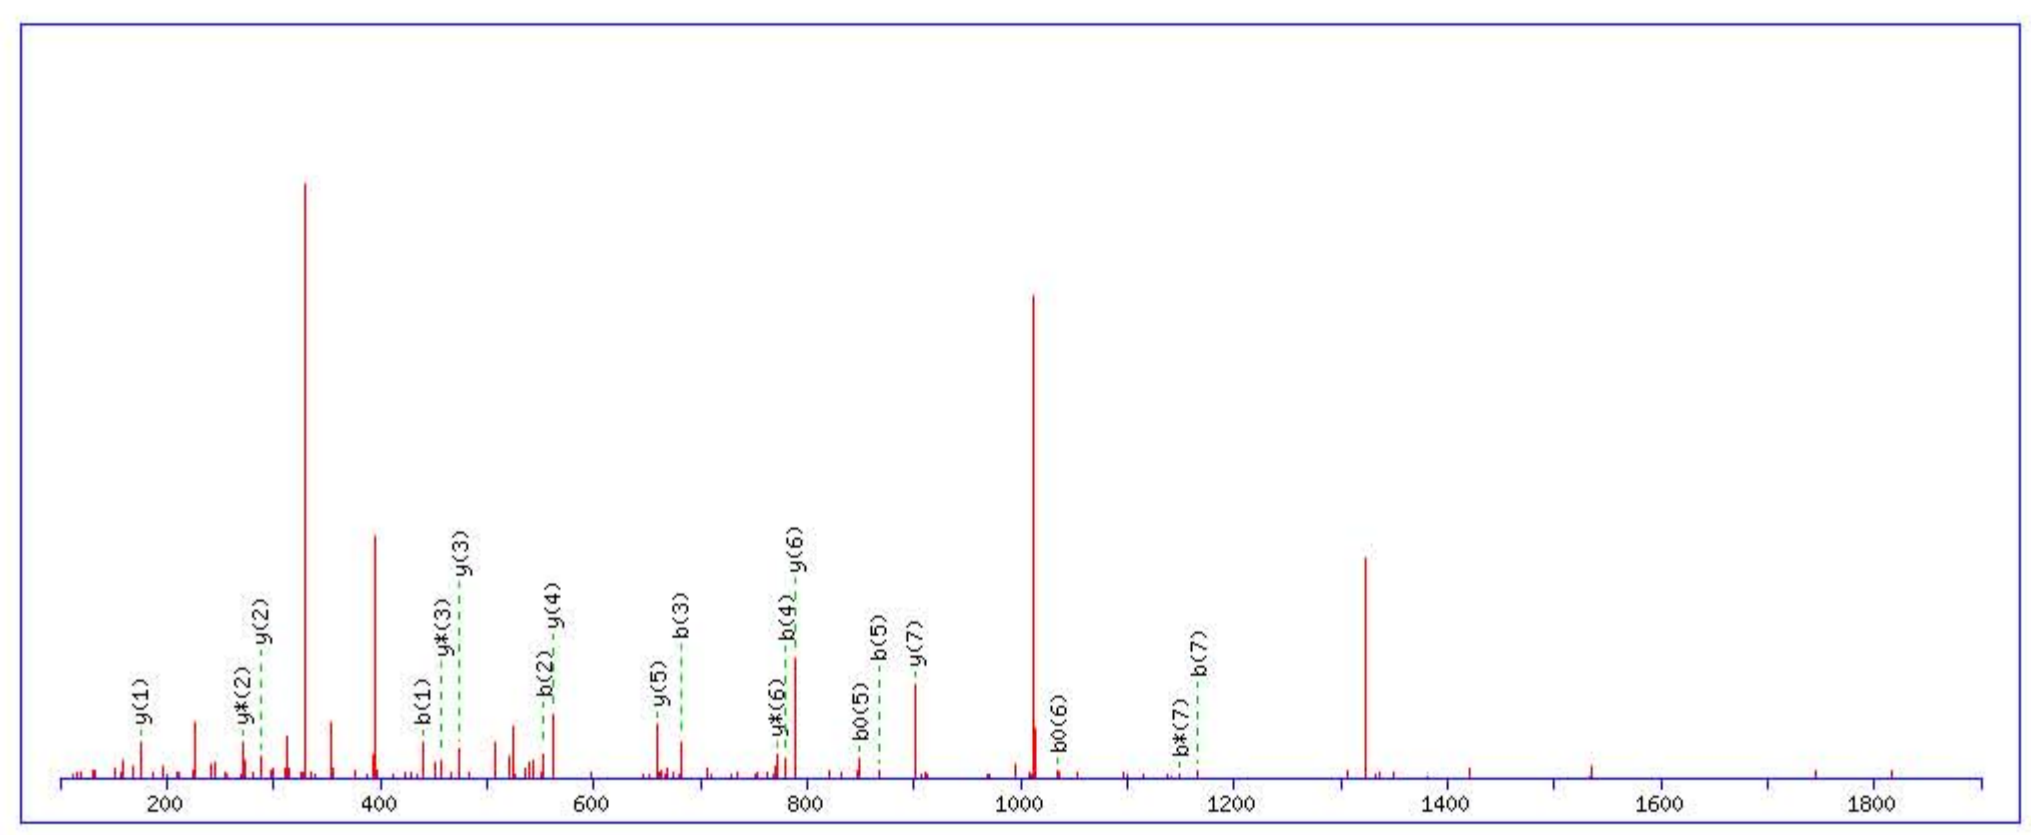

Monoisotopic mass of neutral peptide Mr(calc): 1339.743454

Fixed modifications: Carbamidomethyl (C) (apply to specified residues or termini only)

Variable modifications:

Q1 : Biotin:Thermo-21345 (Q)

Ions Score: 28 Expect: 0.035

Matches : 19/70 fragment ions using 48 most intense peaks [\(help\)](#)

| # | b           | b <sup>++</sup> | b*          | b <sup>+++</sup> | b <sup>0</sup> | b <sup>0++</sup> | Seq. | y          | y <sup>++</sup> | y*         | y <sup>+++</sup> | y <sup>0</sup> | y <sup>0++</sup> | # |
|---|-------------|-----------------|-------------|------------------|----------------|------------------|------|------------|-----------------|------------|------------------|----------------|------------------|---|
| 1 | 440.232602  | 220.619939      | 423.206053  | 212.106664       |                |                  | Q    |            |                 |            |                  |                |                  | 8 |
| 2 | 553.316666  | 277.161971      | 536.290117  | 268.648697       |                |                  | I    | 901.525413 | 451.266344      | 884.498864 | 442.753070       | 883.514848     | 442.261062       | 7 |
| 3 | 681.375244  | 341.191260      | 664.348695  | 332.677986       |                |                  | Q    | 788.441349 | 394.724312      | 771.414800 | 386.211038       | 770.430784     | 385.719030       | 6 |
| 4 | 780.443658  | 390.725467      | 763.417109  | 382.212193       |                |                  | V    | 660.382771 | 330.695023      | 643.356222 | 322.181749       | 642.372206     | 321.689741       | 5 |
| 5 | 867.475686  | 434.241481      | 850.449137  | 425.728207       | 849.465121     | 425.236199       | S    | 561.314357 | 281.160816      | 544.287808 | 272.647542       | 543.303792     | 272.155534       | 4 |
| 6 | 1053.554999 | 527.281138      | 1036.528450 | 518.767863       | 1035.544434    | 518.275855       | W    | 474.282329 | 237.644802      | 457.255780 | 229.131528       |                |                  | 3 |
| 7 | 1166.639063 | 583.823169      | 1149.612514 | 575.309895       | 1148.628498    | 574.817887       | L    | 288.203016 | 144.605146      | 271.176467 | 136.091871       |                |                  | 2 |
| 8 |             |                 |             |                  |                |                  | R    | 175.118952 | 88.063114       | 158.092403 | 79.549839        |                |                  | 1 |

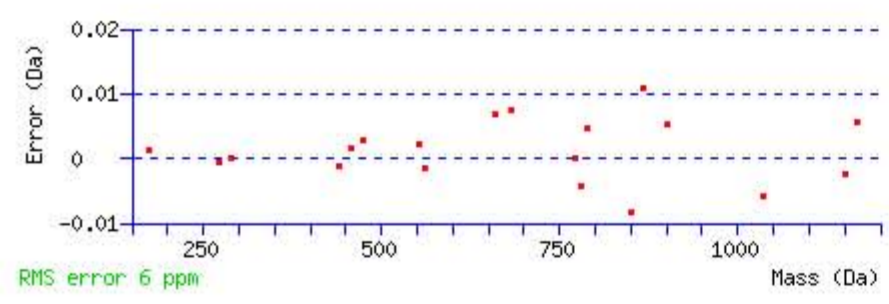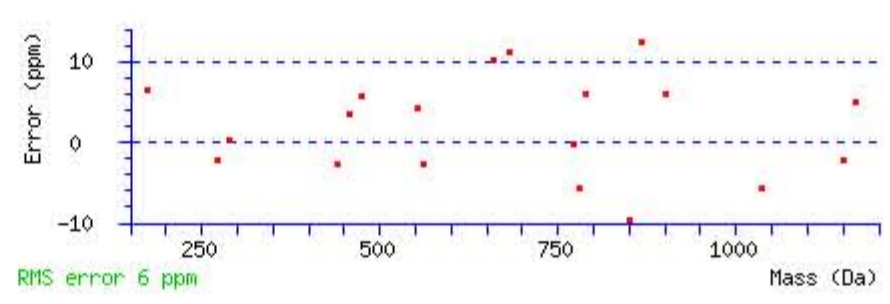

NCBI BLAST search of **QIQVSWLR**

(Parameters: blastp, nr protein database, expect=20000, no filter, PAM30)

Other BLAST [web gateways](#)

### All matches to this query

| Score | Mr(calc):   | Delta     | Sequence                  |
|-------|-------------|-----------|---------------------------|
| 27.8  | 1339.743454 | -0.003066 | <a href="#">QIQVSWLR</a>  |
| 11.4  | 1339.753326 | -0.012938 | <a href="#">QLQISIAEK</a> |
| 11.3  | 1339.739426 | 0.000962  | <a href="#">QLLRDQR</a>   |
| 11.3  | 1339.739410 | 0.000978  | <a href="#">QLNRLETR</a>  |
| 10.3  | 1339.735596 | 0.004792  | <a href="#">QLQVAMPVK</a> |
| 8.8   | 1339.743454 | -0.003066 | <a href="#">QIQVSWLR</a>  |
| 6.5   | 1339.739395 | 0.000993  | <a href="#">QLAEKERR</a>  |
| 6.5   | 1339.743439 | -0.003051 | <a href="#">QLSWLINR</a>  |
| 6.5   | 1339.743454 | -0.003066 | <a href="#">QLTWLVNR</a>  |
| 6.2   | 1339.728180 | 0.012208  | <a href="#">IQQIEKDR</a>  |

# MASCOT SCIENCE Mascot Search Results

## Peptide View

MS/MS Fragmentation of **LICQATGFSPR**

Found in **IGHM\_HUMAN**, Ig mu chain C region OS=Homo sapiens GN=IGHM PE=1 SV=3

Match to Query 28738: 1559.793348 from(780.903950,2+) rtinseconds(2012) index(31987)

Title: Locus:1.1.1.3364.9 File:"2013-07-02 CLN FXIII 180 min 3rd F 3.wiff"

Data file C:\Program Files (x86)\Matrix Science\Mascot Daemon\mgf\9 FXIII 180 min 3rd\mascot\_daemon\_merge.mgf

Click mouse within plot area to zoom in by factor of two about that point

Or, Plot from  to  Da

Label all possible matches  Label matches used for scoring

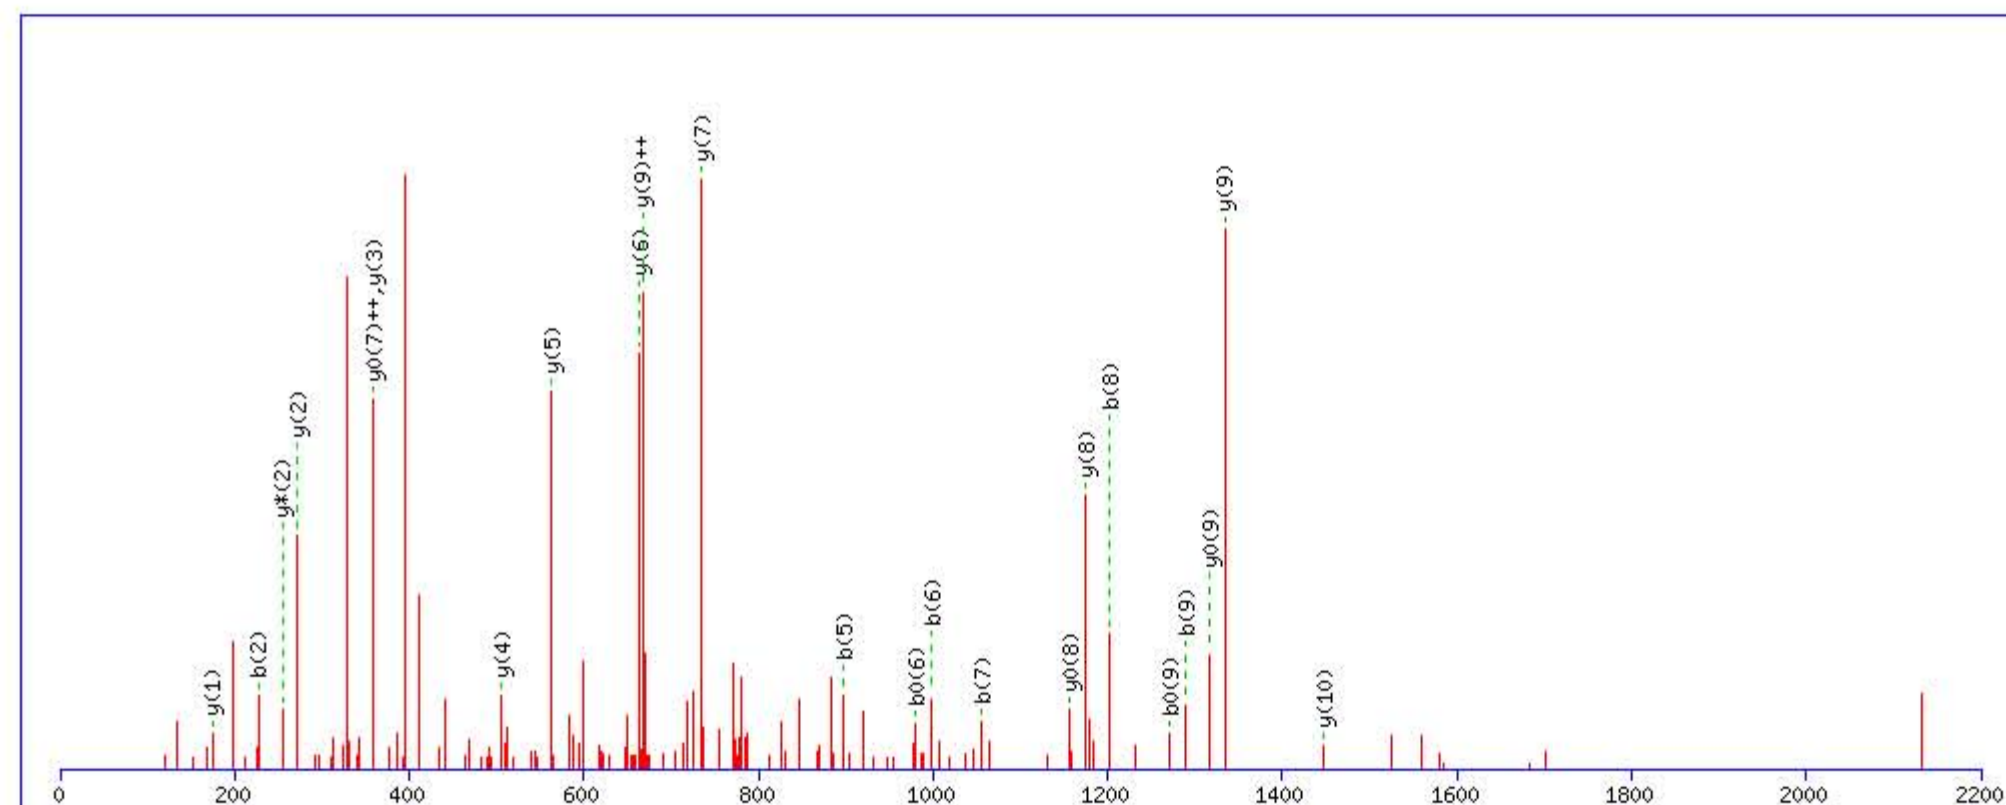

Monoisotopic mass of neutral peptide Mr(calc): 1559.795242

Fixed modifications: Carbamidomethyl (C) (apply to specified residues or termini only)

Variable modifications:

Q4 : Biotin:Thermo-21345 (Q)

Ions Score: 66 Expect: 4.8e-006

Matches : 23/100 fragment ions using 40 most intense peaks [\(help\)](#)

| #  | b                  | b <sup>++</sup> | b <sup>+</sup> | b <sup>+++</sup> | b <sup>0</sup>     | b <sup>0++</sup> | Seq. | y                  | y <sup>++</sup>   | y <sup>+</sup>    | y <sup>+++</sup> | y <sup>0</sup>     | y <sup>0++</sup>  | #  |
|----|--------------------|-----------------|----------------|------------------|--------------------|------------------|------|--------------------|-------------------|-------------------|------------------|--------------------|-------------------|----|
| 1  | 114.091340         | 57.549308       |                |                  |                    |                  | L    |                    |                   |                   |                  |                    |                   | 11 |
| 2  | <b>227.175404</b>  | 114.091340      |                |                  |                    |                  | I    | <b>1447.718454</b> | 724.362865        | 1430.691905       | 715.849591       | 1429.707889        | 715.357583        | 10 |
| 3  | 387.206053         | 194.106664      |                |                  |                    |                  | C    | <b>1334.634390</b> | <b>667.820833</b> | 1317.607841       | 659.307559       | <b>1316.623825</b> | 658.815551        | 9  |
| 4  | 826.431379         | 413.719328      | 809.404830     | 405.206053       |                    |                  | Q    | <b>1174.603741</b> | 587.805509        | 1157.577192       | 579.292234       | <b>1156.593176</b> | 578.800226        | 8  |
| 5  | <b>897.468493</b>  | 449.237885      | 880.441944     | 440.724610       |                    |                  | A    | <b>735.378415</b>  | 368.192846        | 718.351866        | 359.679571       | 717.367850         | <b>359.187563</b> | 7  |
| 6  | <b>998.516172</b>  | 499.761724      | 981.489623     | 491.248449       | <b>980.505607</b>  | 490.756441       | T    | <b>664.341301</b>  | 332.674289        | 647.314752        | 324.161014       | 646.330736         | 323.669006        | 6  |
| 7  | <b>1055.537636</b> | 528.272456      | 1038.511087    | 519.759182       | 1037.527071        | 519.267174       | G    | <b>563.293622</b>  | 282.150449        | 546.267073        | 273.637175       | 545.283057         | 273.145167        | 5  |
| 8  | <b>1202.606050</b> | 601.806663      | 1185.579501    | 593.293389       | 1184.595485        | 592.801381       | F    | <b>506.272158</b>  | 253.639717        | 489.245609        | 245.126443       | 488.261593         | 244.634435        | 4  |
| 9  | <b>1289.638078</b> | 645.322677      | 1272.611529    | 636.809403       | <b>1271.627513</b> | 636.317395       | S    | <b>359.203744</b>  | 180.105510        | 342.177195        | 171.592236       | 341.193179         | 171.100228        | 3  |
| 10 | 1386.690842        | 693.849059      | 1369.664293    | 685.335785       | 1368.680277        | 684.843777       | P    | <b>272.171716</b>  | 136.589496        | <b>255.145167</b> | 128.076221       |                    |                   | 2  |
| 11 |                    |                 |                |                  |                    |                  | R    | <b>175.118952</b>  | 88.063114         | 158.092403        | 79.549839        |                    |                   | 1  |

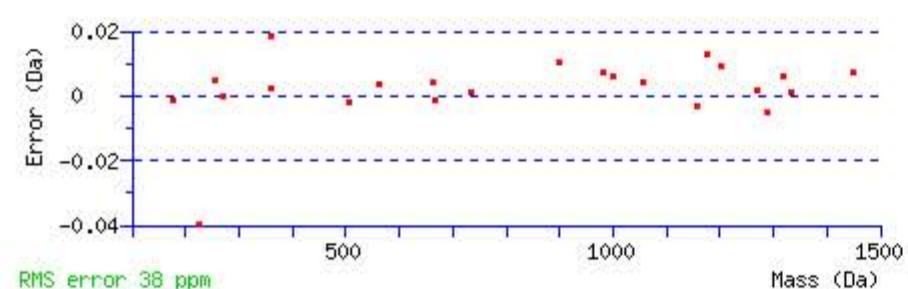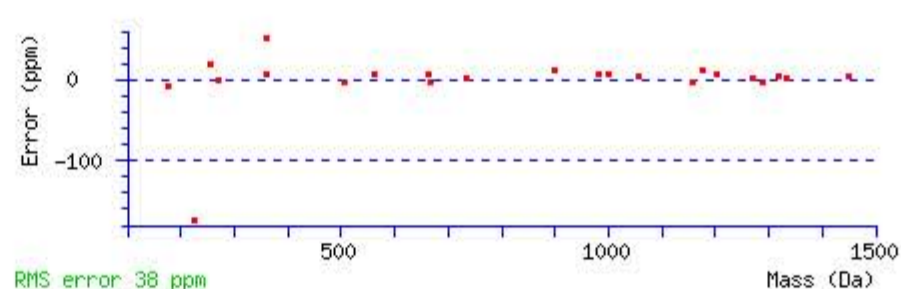

NCBI BLAST search of **LICQATGFSPR**

(Parameters: blastp, nr protein database, expect=20000, no filter, PAM30)

Other BLAST [web gateways](#)

All matches to this query

| Score | Mr(calc):   | Delta     | Sequence                         |
|-------|-------------|-----------|----------------------------------|
| 66.1  | 1559.795242 | -0.001894 | <a href="#">LICQATGFSPR</a>      |
| 8.9   | 1559.808960 | -0.015612 | <a href="#">LDRLSGLADQMVAR</a>   |
| 3.3   | 1559.770081 | 0.023267  | <a href="#">ARCEVQFSPR</a>       |
| 2.5   | 1559.808975 | -0.015627 | <a href="#">LLDRDACDTRVK</a>     |
| 1.7   | 1559.787827 | 0.005521  | <a href="#">SLHPAMLPAADGAGPR</a> |

Mascot: <http://www.matrixscience.com/>

# MASCOT SEARCH RESULTS

## Peptide View

MS/MS Fragmentation of **YAATSQVLLPSK**

Found in **IGHM\_HUMAN**, Ig mu chain C region OS=Homo sapiens GN=IGHM PE=1 SV=3

Match to Query 30020: 1587.867628 from(794.941090,2+) rtinseconds(2059) index(32220)

Title: Locus:1.1.1.3380.16 File:"2013-07-02 CLN FXIII 180 min 3rd F 3.wiff"

Data file C:\Program Files (x86)\Matrix Science\Mascot Daemon\mgf\9 FXIII 180 min 3rd\mascot\_daemon\_merge.mgf

Click mouse within plot area to zoom in by factor of two about that point

Or, Plot from 100 to 1900 Da Full range

Label all possible matches  Label matches used for scoring

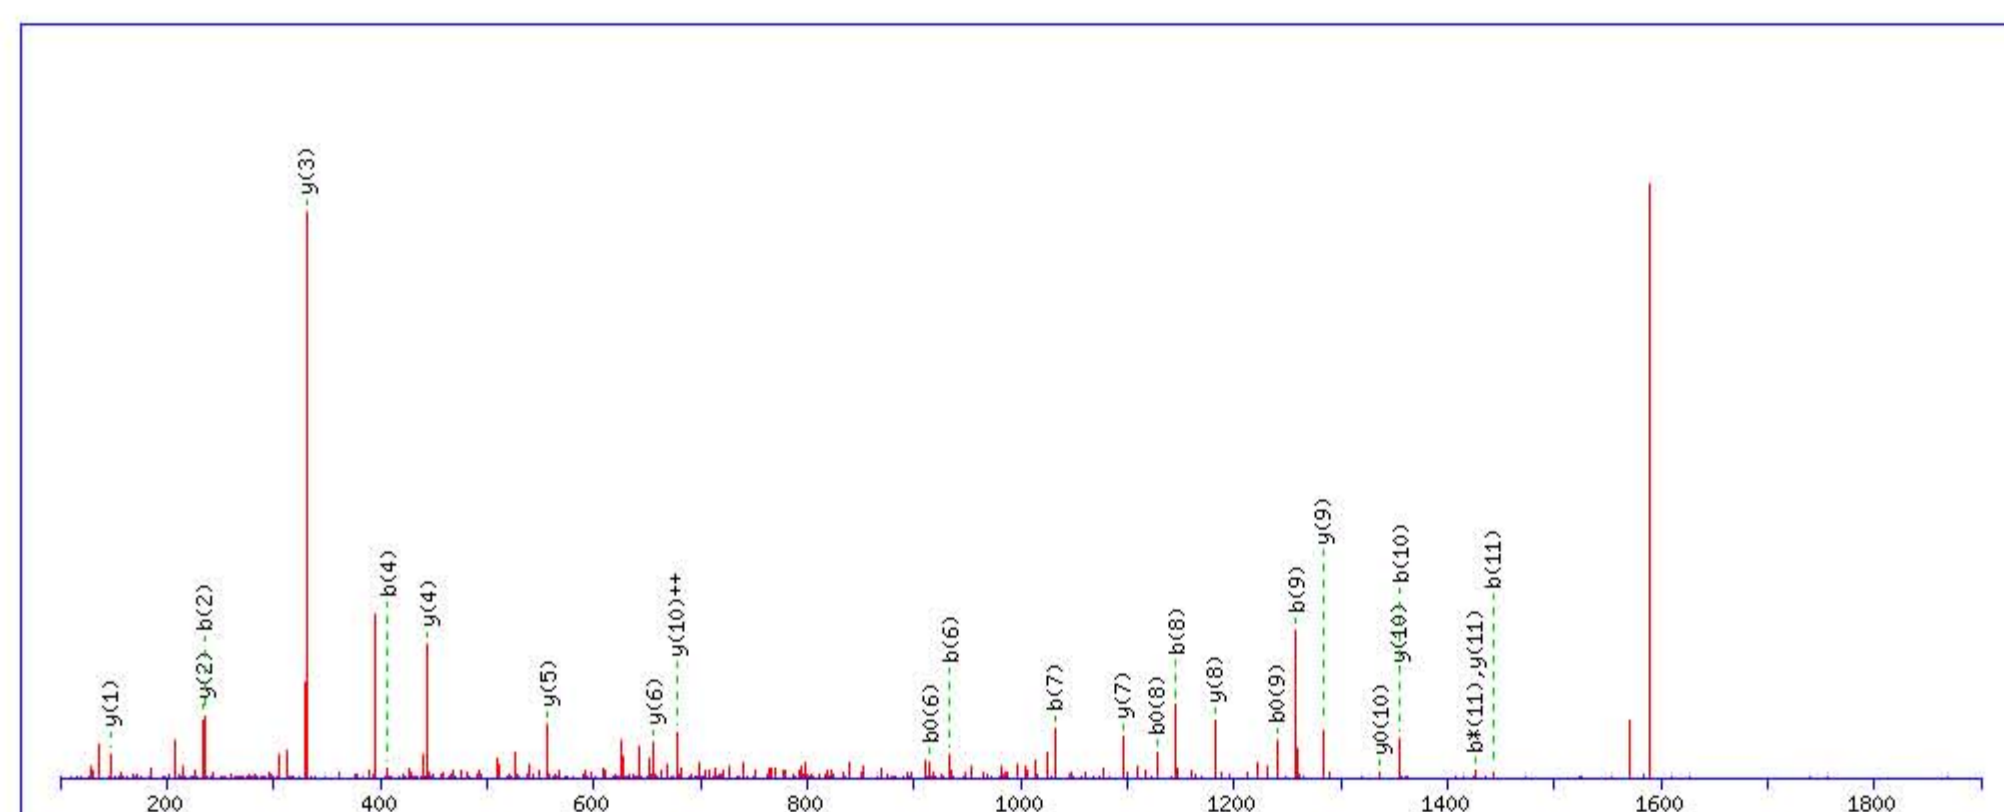

Monoisotopic mass of neutral peptide Mr(calc): 1587.869431

Fixed modifications: Carbamidomethyl (C) (apply to specified residues or termini only)

Variable modifications:

Q6 : Biotin:Thermo-21345 (Q)

Ions Score: 72 Expect: 1.3e-006

Matches : 25/114 fragment ions using 45 most intense peaks [\(help\)](#)

| #  | b                  | b <sup>++</sup> | b <sup>*</sup>     | b <sup>+++</sup> | b <sup>0</sup>     | b <sup>0++</sup> | Seq. | y                  | y <sup>++</sup>   | y <sup>*</sup> | y <sup>+++</sup> | y <sup>0</sup>     | y <sup>0++</sup> | #  |
|----|--------------------|-----------------|--------------------|------------------|--------------------|------------------|------|--------------------|-------------------|----------------|------------------|--------------------|------------------|----|
| 1  | 164.070605         | 82.538940       |                    |                  |                    |                  | Y    |                    |                   |                |                  |                    |                  | 12 |
| 2  | <b>235.107719</b>  | 118.057498      |                    |                  |                    |                  | A    | <b>1425.813399</b> | 713.410337        | 1408.786850    | 704.897063       | 1407.802834        | 704.405055       | 11 |
| 3  | 306.144833         | 153.576055      |                    |                  |                    |                  | A    | <b>1354.776285</b> | <b>677.891780</b> | 1337.749736    | 669.378506       | <b>1336.765720</b> | 668.886498       | 10 |
| 4  | <b>407.192512</b>  | 204.099894      |                    |                  | 389.181947         | 195.094612       | T    | <b>1283.739171</b> | 642.373223        | 1266.712622    | 633.859949       | 1265.728606        | 633.367941       | 9  |
| 5  | 494.224540         | 247.615908      |                    |                  | 476.213975         | 238.610626       | S    | <b>1182.691492</b> | 591.849384        | 1165.664943    | 583.336110       | 1164.680927        | 582.844101       | 8  |
| 6  | <b>933.449866</b>  | 467.228571      | 916.423317         | 458.715297       | <b>915.439301</b>  | 458.223289       | Q    | <b>1095.659464</b> | 548.333370        | 1078.632915    | 539.820096       | 1077.648899        | 539.328088       | 7  |
| 7  | <b>1032.518280</b> | 516.762778      | 1015.491731        | 508.249504       | 1014.507715        | 507.757496       | V    | <b>656.434138</b>  | 328.720707        | 639.407589     | 320.207432       | 638.423573         | 319.715424       | 6  |
| 8  | <b>1145.602344</b> | 573.304810      | 1128.575795        | 564.791536       | <b>1127.591779</b> | 564.299527       | L    | <b>557.365724</b>  | 279.186500        | 540.339175     | 270.673226       | 539.355159         | 270.181218       | 5  |
| 9  | <b>1258.686408</b> | 629.846842      | 1241.659859        | 621.333567       | <b>1240.675843</b> | 620.841559       | L    | <b>444.281660</b>  | 222.644468        | 427.255111     | 214.131193       | 426.271095         | 213.639186       | 4  |
| 10 | <b>1355.739172</b> | 678.373224      | 1338.712623        | 669.859949       | 1337.728607        | 669.367941       | P    | <b>331.197596</b>  | 166.102436        | 314.171047     | 157.589162       | 313.187031         | 157.097154       | 3  |
| 11 | <b>1442.771200</b> | 721.889238      | <b>1425.744651</b> | 713.375964       | 1424.760635        | 712.883955       | S    | <b>234.144832</b>  | 117.576054        | 217.118283     | 109.062780       | 216.134267         | 108.570772       | 2  |
| 12 |                    |                 |                    |                  |                    |                  | K    | <b>147.112804</b>  | 74.060040         | 130.086255     | 65.546765        |                    |                  | 1  |

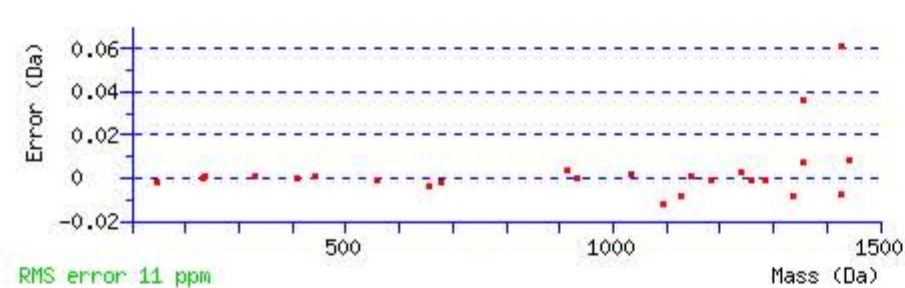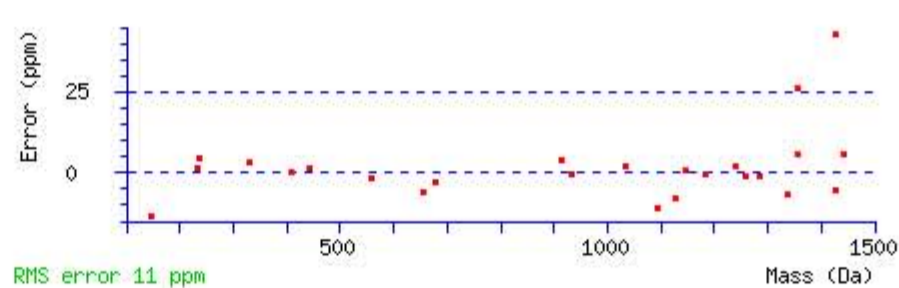

NCBI BLAST search of [YAATSQVLLPSK](#)

(Parameters: blastp, nr protein database, expect=20000, no filter, PAM30)

Other BLAST [web gateways](#)

All matches to this query

| Score | Mr(calc):   | Delta     | Sequence                        |
|-------|-------------|-----------|---------------------------------|
| 72.4  | 1587.869431 | -0.001803 | <a href="#">YAATSQVLLPSK</a>    |
| 14.9  | 1587.862045 | 0.005583  | <a href="#">VTGQNQEQFLLAK</a>   |
| 10.4  | 1587.862045 | 0.005583  | <a href="#">DGASLSPATLFIQIR</a> |
| 5.5   | 1587.874603 | -0.006975 | <a href="#">SFAFRSAIQHRR</a>    |
| 4.8   | 1587.891220 | -0.023592 | <a href="#">TIQTIVFLYSLYK</a>   |
| 4.8   | 1587.862030 | 0.005598  | <a href="#">EDAKLSFKHVSSLK</a>  |
| 4.6   | 1587.858002 | 0.009626  | <a href="#">LSQEQTLQALRSSK</a>  |
| 4.5   | 1587.846802 | 0.020826  | <a href="#">KSDIDEIVLVGGSTR</a> |
| 3.7   | 1587.890533 | -0.022905 | <a href="#">EPTTKAEMLKIIISK</a> |
| 3.5   | 1587.865402 | 0.002226  | <a href="#">ENGLRDILAVLTMK</a>  |



# MASCOT SEARCH RESULTS

## Peptide View

MS/MS Fragmentation of **DVMQGTDEHVVCK**

Found in **IGHM\_HUMAN**, Ig mu chain C region OS=Homo sapiens GN=IGHM PE=1 SV=3

Match to Query 36287: 1827.822822 from(610.281550,3+) rtinseconds(1652) index(29794)

Title: Locus:1.1.1.3238.12 File:"2013-07-02 CLN FXIII 180 min 3rd F 3.wiff"

Data file C:\Program Files (x86)\Matrix Science\Mascot Daemon\mgf\9 FXIII 180 min 3rd\mascot\_daemon\_merge.mgf

Click mouse within plot area to zoom in by factor of two about that point

Or, Plot from  to  Da

Label all possible matches  Label matches used for scoring

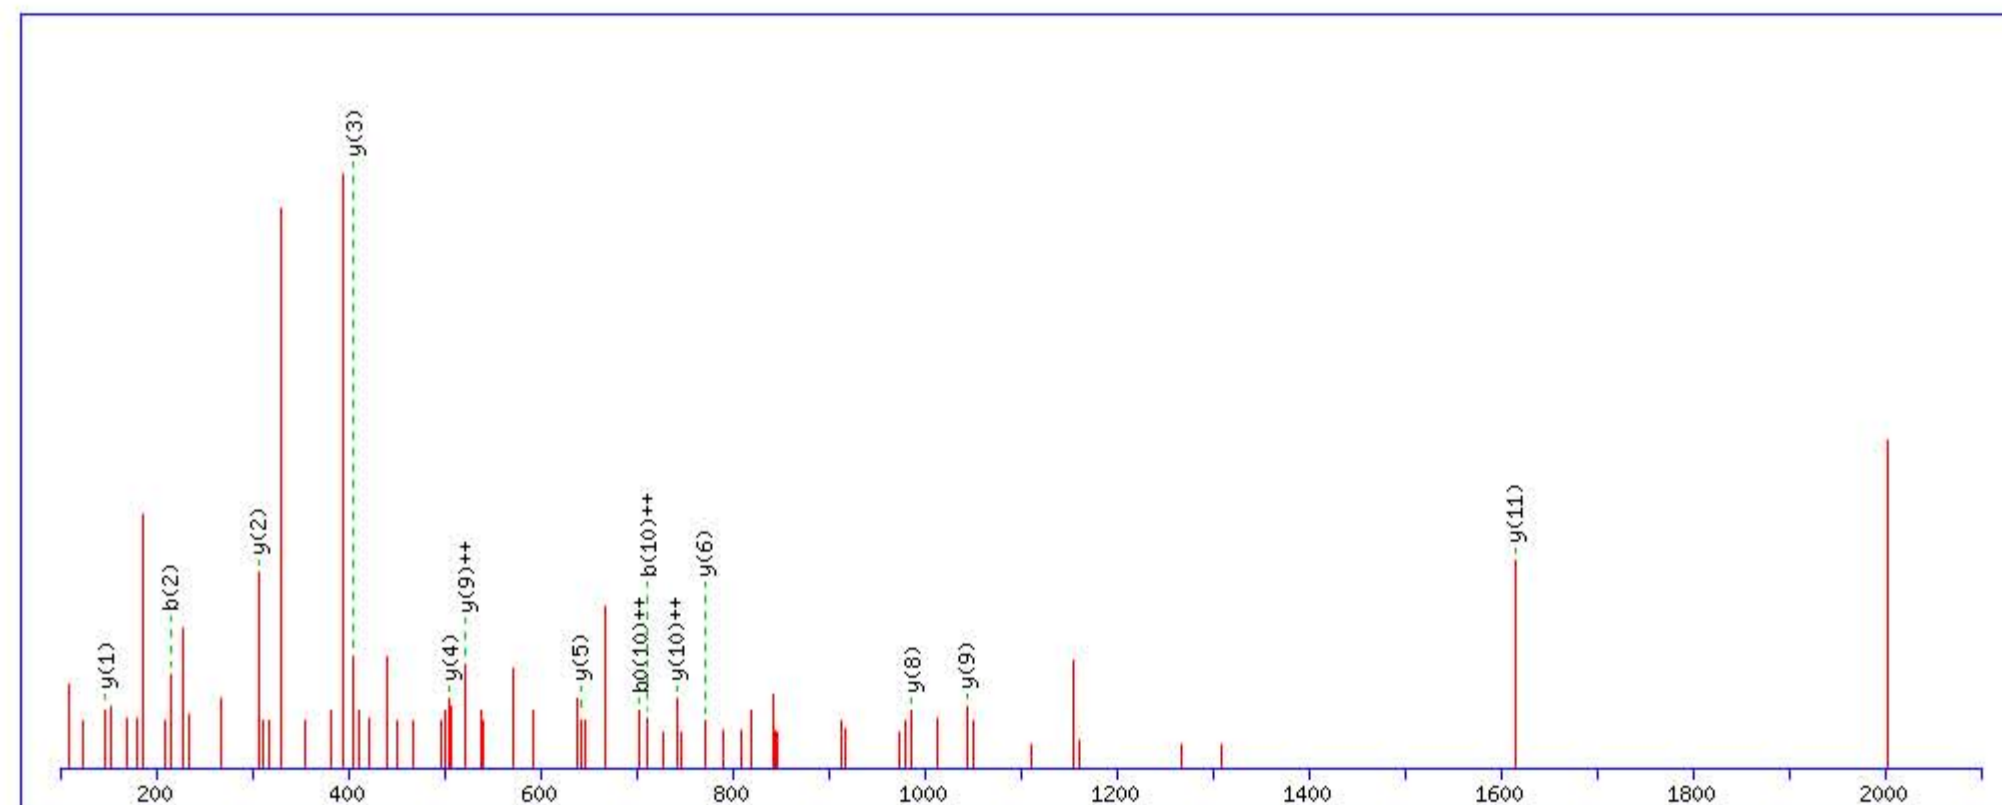

Monoisotopic mass of neutral peptide Mr(calc): 1827.831787

Fixed modifications: Carbamidomethyl (C) (apply to specified residues or termini only)

Variable modifications:

Q4 : Biotin:Thermo-21345 (Q)

Ions Score: 25 Expect: 0.029

Matches : 14/128 fragment ions using 45 most intense peaks [\(help\)](#)

| #  | b                 | b <sup>++</sup>   | b <sup>*</sup> | b <sup>*++</sup> | b <sup>0</sup> | b <sup>0++</sup>  | Seq. | y                  | y <sup>++</sup>   | y <sup>*</sup> | y <sup>*++</sup> | y <sup>0</sup> | y <sup>0++</sup> | #  |
|----|-------------------|-------------------|----------------|------------------|----------------|-------------------|------|--------------------|-------------------|----------------|------------------|----------------|------------------|----|
| 1  | 116.034219        | 58.520748         |                |                  | 98.023654      | 49.515465         | D    |                    |                   |                |                  |                |                  | 13 |
| 2  | <b>215.102633</b> | 108.054954        |                |                  | 197.092068     | 99.049672         | V    | 1713.812097        | 857.409687        | 1696.785548    | 848.896412       | 1695.801532    | 848.404404       | 12 |
| 3  | 346.143118        | 173.575197        |                |                  | 328.132553     | 164.569915        | M    | <b>1614.743683</b> | 807.875480        | 1597.717134    | 799.362205       | 1596.733118    | 798.870197       | 11 |
| 4  | 785.368444        | 393.187860        | 768.341895     | 384.674586       | 767.357879     | 384.182578        | Q    | 1483.703198        | <b>742.355237</b> | 1466.676649    | 733.841963       | 1465.692633    | 733.349955       | 10 |
| 5  | 842.389908        | 421.698592        | 825.363359     | 413.185318       | 824.379343     | 412.693310        | G    | <b>1044.477872</b> | <b>522.742574</b> | 1027.451323    | 514.229300       | 1026.467307    | 513.737292       | 9  |
| 6  | 943.437587        | 472.222432        | 926.411038     | 463.709157       | 925.427022     | 463.217149        | T    | <b>987.456408</b>  | 494.231842        | 970.429859     | 485.718568       | 969.445843     | 485.226560       | 8  |
| 7  | 1058.464530       | 529.735903        | 1041.437981    | 521.222629       | 1040.453965    | 520.730621        | D    | 886.408729         | 443.708003        | 869.382180     | 435.194728       | 868.398164     | 434.702720       | 7  |
| 8  | 1187.507123       | 594.257200        | 1170.480574    | 585.743925       | 1169.496558    | 585.251917        | E    | <b>771.381786</b>  | 386.194531        | 754.355237     | 377.681257       | 753.371221     | 377.189249       | 6  |
| 9  | 1324.566035       | 662.786656        | 1307.539486    | 654.273381       | 1306.555470    | 653.781373        | H    | <b>642.339193</b>  | 321.673235        | 625.312644     | 313.159960       |                |                  | 5  |
| 10 | 1423.634449       | <b>712.320863</b> | 1406.607900    | 703.807588       | 1405.623884    | <b>703.315580</b> | V    | <b>505.280281</b>  | 253.143779        | 488.253732     | 244.630504       |                |                  | 4  |
| 11 | 1522.702863       | 761.855070        | 1505.676314    | 753.341795       | 1504.692298    | 752.849787        | V    | <b>406.211867</b>  | 203.609572        | 389.185318     | 195.096297       |                |                  | 3  |
| 12 | 1682.733512       | 841.870394        | 1665.706963    | 833.357120       | 1664.722947    | 832.865112        | C    | <b>307.143453</b>  | 154.075365        | 290.116904     | 145.562090       |                |                  | 2  |
| 13 |                   |                   |                |                  |                |                   | K    | <b>147.112804</b>  | 74.060040         | 130.086255     | 65.546765        |                |                  | 1  |

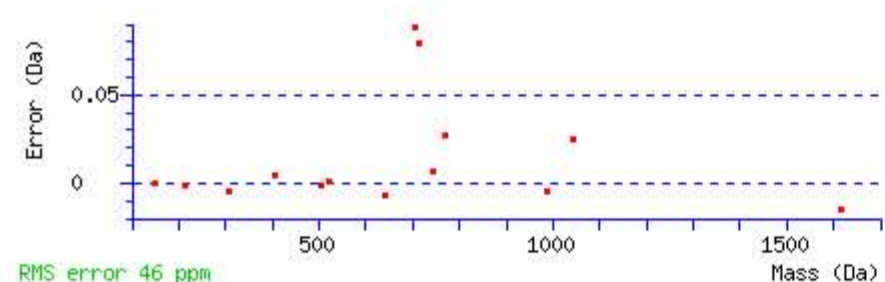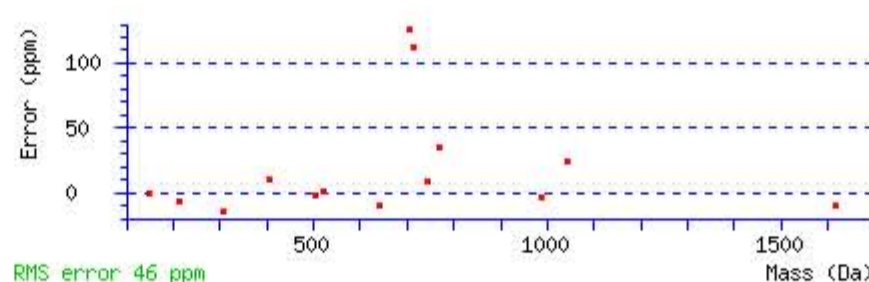

NCBI BLAST search of [DVMQGTDEHVVCK](#)

(Parameters: blastp, nr protein database, expect=20000, no filter, PAM30)

Other BLAST [web gateways](#)

## All matches to this query

| Score | Mr(calc):   | Delta     | Sequence                      |
|-------|-------------|-----------|-------------------------------|
| 25.0  | 1827.831787 | -0.008965 | <a href="#">DVMQGTDEHVVCK</a> |

Mascot: <http://www.matrixscience.com/>

# MASCOT Search Results

## Peptide View

MS/MS Fragmentation of **YVTSAPMPEPQAPGR**

Found in **IGHM\_HUMAN**, Ig mu chain C region OS=Homo sapiens GN=IGHM PE=1 SV=3

Match to Query 37641: 1910.930802 from(637.984210,3+) rtinseconds(1900) index(31109)

Title: Locus:1.1.1.3325.18 File:"2013-07-02 CLN FXIII 180 min 3rd F 3.wiff"

Data file C:\Program Files (x86)\Matrix Science\Mascot Daemon\mgf\9 FXIII 180 min 3rd\mascot\_daemon\_merge.mgf

Click mouse within plot area to zoom in by factor of two about that point

Or, Plot from  to  Da

Label all possible matches  Label matches used for scoring

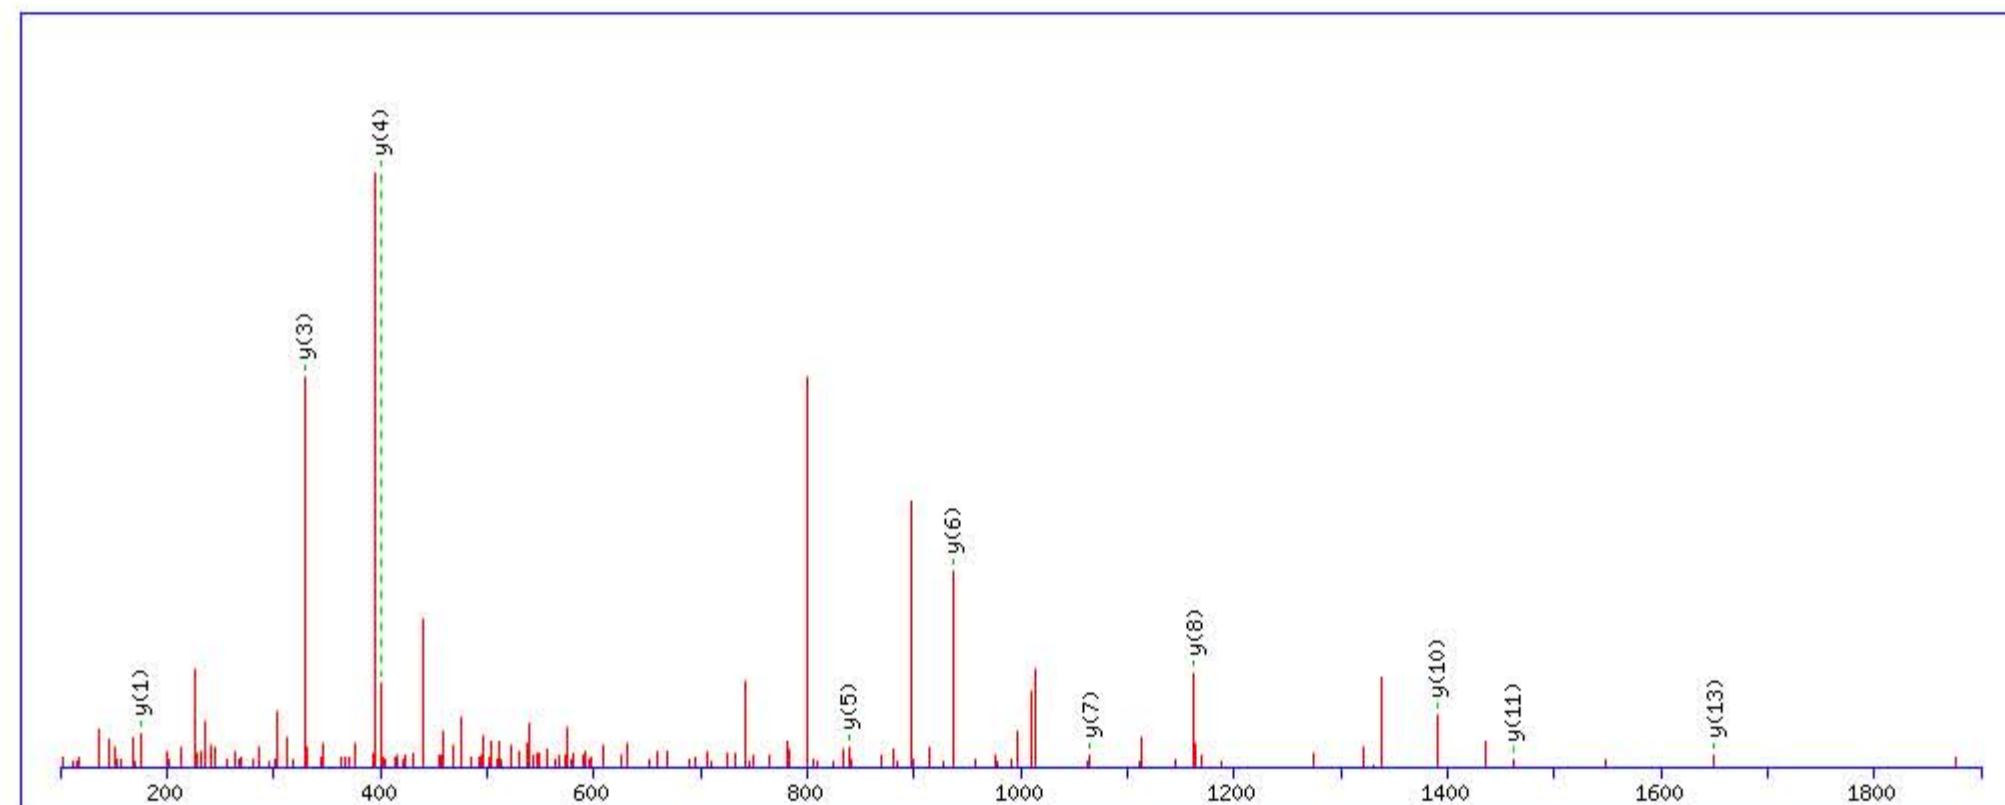

Monoisotopic mass of neutral peptide Mr(calc): 1910.938263

Fixed modifications: Carbamidomethyl (C) (apply to specified residues or termini only)

Variable modifications:

Q11 : Biotin:Thermo-21345 (Q)

Ions Score: 31 Expect: 0.02

Matches : 10/132 fragment ions using 42 most intense peaks [\(help\)](#)

| #  | b           | b <sup>++</sup> | b <sup>*</sup> | b <sup>*++</sup> | b <sup>0</sup> | b <sup>0++</sup> | Seq. | y                  | y <sup>++</sup> | y <sup>*</sup> | y <sup>*++</sup> | y <sup>0</sup> | y <sup>0++</sup> | #  |
|----|-------------|-----------------|----------------|------------------|----------------|------------------|------|--------------------|-----------------|----------------|------------------|----------------|------------------|----|
| 1  | 164.070605  | 82.538940       |                |                  |                |                  | Y    |                    |                 |                |                  |                |                  | 15 |
| 2  | 263.139019  | 132.073148      |                |                  |                |                  | V    | 1748.882225        | 874.944750      | 1731.855676    | 866.431476       | 1730.871660    | 865.939468       | 14 |
| 3  | 364.186698  | 182.596987      |                |                  | 346.176133     | 173.591705       | T    | <b>1649.813811</b> | 825.410543      | 1632.787262    | 816.897269       | 1631.803246    | 816.405261       | 13 |
| 4  | 451.218726  | 226.113001      |                |                  | 433.208161     | 217.107719       | S    | 1548.766132        | 774.886704      | 1531.739583    | 766.373430       | 1530.755567    | 765.881421       | 12 |
| 5  | 522.255840  | 261.631558      |                |                  | 504.245275     | 252.626276       | A    | <b>1461.734104</b> | 731.370690      | 1444.707555    | 722.857416       | 1443.723539    | 722.365407       | 11 |
| 6  | 619.308604  | 310.157940      |                |                  | 601.298039     | 301.152658       | P    | <b>1390.696990</b> | 695.852133      | 1373.670441    | 687.338859       | 1372.686425    | 686.846850       | 10 |
| 7  | 750.349089  | 375.678183      |                |                  | 732.338524     | 366.672900       | M    | 1293.644226        | 647.325751      | 1276.617677    | 638.812477       | 1275.633661    | 638.320468       | 9  |
| 8  | 847.401853  | 424.204565      |                |                  | 829.391288     | 415.199282       | P    | <b>1162.603741</b> | 581.805508      | 1145.577192    | 573.292234       | 1144.593176    | 572.800226       | 8  |
| 9  | 976.444446  | 488.725861      |                |                  | 958.433881     | 479.720579       | E    | <b>1065.550977</b> | 533.279126      | 1048.524428    | 524.765852       | 1047.540412    | 524.273844       | 7  |
| 10 | 1073.497210 | 537.252243      |                |                  | 1055.486645    | 528.246961       | P    | <b>936.508384</b>  | 468.757830      | 919.481835     | 460.244555       |                |                  | 6  |
| 11 | 1512.722536 | 756.864906      | 1495.695987    | 748.351632       | 1494.711971    | 747.859624       | Q    | <b>839.455620</b>  | 420.231448      | 822.429071     | 411.718173       |                |                  | 5  |
| 12 | 1583.759650 | 792.383463      | 1566.733101    | 783.870189       | 1565.749085    | 783.378180       | A    | <b>400.230294</b>  | 200.618785      | 383.203745     | 192.105510       |                |                  | 4  |
| 13 | 1680.812414 | 840.909845      | 1663.785865    | 832.396571       | 1662.801849    | 831.904563       | P    | <b>329.193180</b>  | 165.100228      | 312.166631     | 156.586953       |                |                  | 3  |
| 14 | 1737.833878 | 869.420577      | 1720.807329    | 860.907303       | 1719.823313    | 860.415294       | G    | 232.140416         | 116.573846      | 215.113867     | 108.060571       |                |                  | 2  |
| 15 |             |                 |                |                  |                |                  | R    | <b>175.118952</b>  | 88.063114       | 158.092403     | 79.549839        |                |                  | 1  |

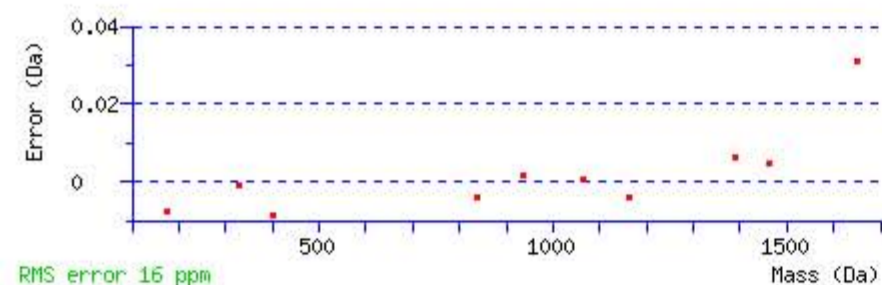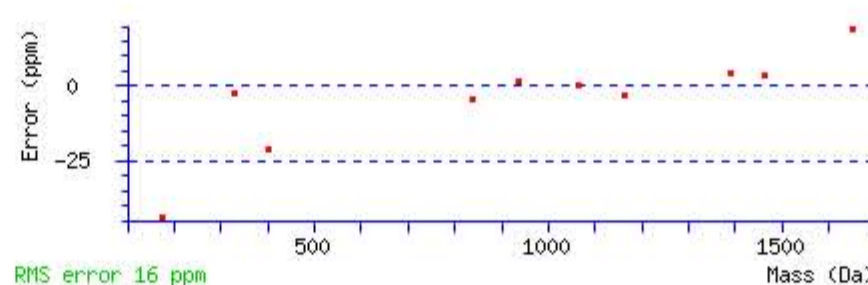

NCBI BLAST search of [YVTSAPMPEPQAPGR](#)

(Parameters: blastp, nr protein database, expect=20000, no filter, PAM30)

Other BLAST [web gateways](#)

## All matches to this query

| Score | Mr(calc):   | Delta     | Sequence                        |
|-------|-------------|-----------|---------------------------------|
| 30.6  | 1910.938263 | -0.007461 | <a href="#">YVTSAPMPEPQAPGR</a> |
| 22.6  | 1910.934265 | -0.003463 | <a href="#">SGSDEVQVGQQR</a>    |
| 22.6  | 1910.934265 | -0.003463 | <a href="#">SGSDEVQVGQQR</a>    |

# MASCOT Search Results

## Peptide View

MS/MS Fragmentation of **YVTSAPMPEPQAPGR**

Found in **IGHM\_HUMAN**, Ig mu chain C region OS=Homo sapiens GN=IGHM PE=1 SV=3

Match to Query 37642: 1910.930802 from(637.984210,3+) rtinseconds(1891) index(31052)

Title: Locus:1.1.1.3322.9 File:"2013-07-02 CLN FXIII 180 min 3rd F 3.wiff"

Data file C:\Program Files (x86)\Matrix Science\Mascot Daemon\mgf9 FXIII 180 min 3rd\mascot\_daemon\_merge.mgf

Click mouse within plot area to zoom in by factor of two about that point

Or, Plot from  to  Da

Label all possible matches  Label matches used for scoring

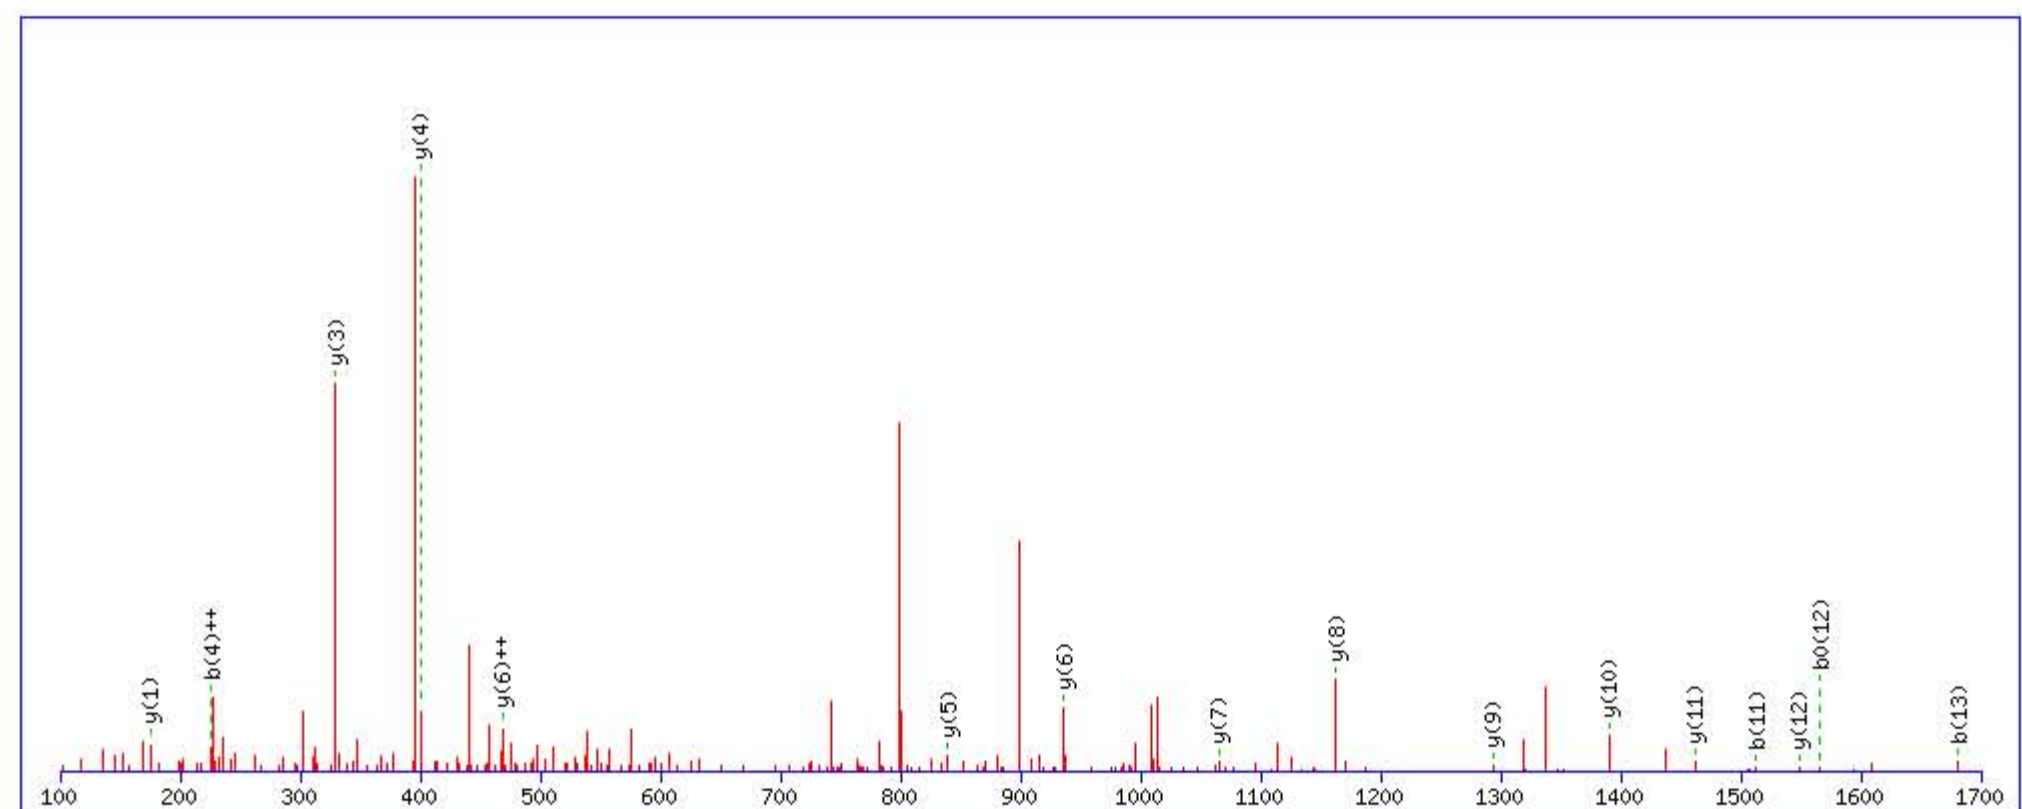

Monoisotopic mass of neutral peptide Mr(calc): 1910.938263

Fixed modifications: Carbamidomethyl (C) (apply to specified residues or termini only)

Variable modifications:

Q11 : Biotin:Thermo-21345 (Q)

Ions Score: 33 Expect: 0.012

Matches : 16/132 fragment ions using 58 most intense peaks [\(help\)](#)

| #  | b                  | b <sup>++</sup>   | b <sup>*</sup> | b <sup>*++</sup> | b <sup>0</sup>     | b <sup>0++</sup> | Seq. | y                  | y <sup>++</sup>   | y <sup>*</sup> | y <sup>*++</sup> | y <sup>0</sup> | y <sup>0++</sup> | #  |
|----|--------------------|-------------------|----------------|------------------|--------------------|------------------|------|--------------------|-------------------|----------------|------------------|----------------|------------------|----|
| 1  | 164.070605         | 82.538940         |                |                  |                    |                  | Y    |                    |                   |                |                  |                |                  | 15 |
| 2  | 263.139019         | 132.073148        |                |                  |                    |                  | V    | 1748.882225        | 874.944750        | 1731.855676    | 866.431476       | 1730.871660    | 865.939468       | 14 |
| 3  | 364.186698         | 182.596987        |                |                  | 346.176133         | 173.591705       | T    | 1649.813811        | 825.410543        | 1632.787262    | 816.897269       | 1631.803246    | 816.405261       | 13 |
| 4  | 451.218726         | <b>226.113001</b> |                |                  | 433.208161         | 217.107719       | S    | <b>1548.766132</b> | 774.886704        | 1531.739583    | 766.373430       | 1530.755567    | 765.881421       | 12 |
| 5  | 522.255840         | 261.631558        |                |                  | 504.245275         | 252.626276       | A    | <b>1461.734104</b> | 731.370690        | 1444.707555    | 722.857416       | 1443.723539    | 722.365407       | 11 |
| 6  | 619.308604         | 310.157940        |                |                  | 601.298039         | 301.152658       | P    | <b>1390.696990</b> | 695.852133        | 1373.670441    | 687.338859       | 1372.686425    | 686.846850       | 10 |
| 7  | 750.349089         | 375.678183        |                |                  | 732.338524         | 366.672900       | M    | <b>1293.644226</b> | 647.325751        | 1276.617677    | 638.812477       | 1275.633661    | 638.320468       | 9  |
| 8  | 847.401853         | 424.204565        |                |                  | 829.391288         | 415.199282       | P    | <b>1162.603741</b> | 581.805508        | 1145.577192    | 573.292234       | 1144.593176    | 572.800226       | 8  |
| 9  | 976.444446         | 488.725861        |                |                  | 958.433881         | 479.720579       | E    | <b>1065.550977</b> | 533.279126        | 1048.524428    | 524.765852       | 1047.540412    | 524.273844       | 7  |
| 10 | 1073.497210        | 537.252243        |                |                  | 1055.486645        | 528.246961       | P    | <b>936.508384</b>  | <b>468.757830</b> | 919.481835     | 460.244555       |                |                  | 6  |
| 11 | <b>1512.722536</b> | 756.864906        | 1495.695987    | 748.351632       | 1494.711971        | 747.859624       | Q    | <b>839.455620</b>  | 420.231448        | 822.429071     | 411.718173       |                |                  | 5  |
| 12 | 1583.759650        | 792.383463        | 1566.733101    | 783.870189       | <b>1565.749085</b> | 783.378180       | A    | <b>400.230294</b>  | 200.618785        | 383.203745     | 192.105510       |                |                  | 4  |
| 13 | <b>1680.812414</b> | 840.909845        | 1663.785865    | 832.396571       | 1662.801849        | 831.904563       | P    | <b>329.193180</b>  | 165.100228        | 312.166631     | 156.586953       |                |                  | 3  |
| 14 | 1737.833878        | 869.420577        | 1720.807329    | 860.907303       | 1719.823313        | 860.415294       | G    | 232.140416         | 116.573846        | 215.113867     | 108.060571       |                |                  | 2  |
| 15 |                    |                   |                |                  |                    |                  | R    | <b>175.118952</b>  | 88.063114         | 158.092403     | 79.549839        |                |                  | 1  |

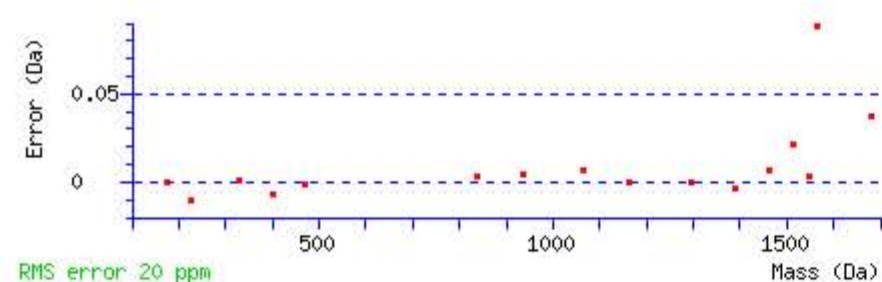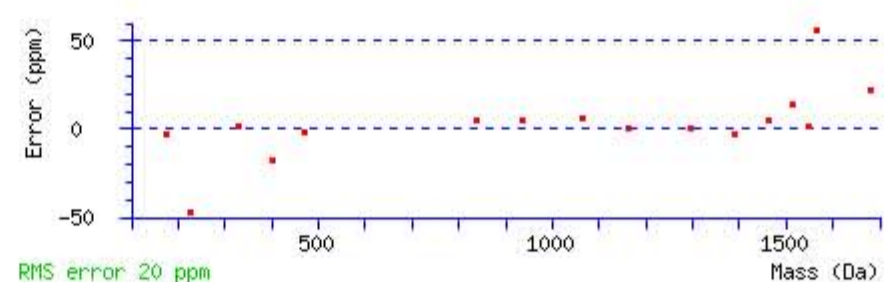

NCBI BLAST search of **YVTSAPMPEPQAPGR**

(Parameters: blastp, nr protein database, expect=20000, no filter, PAM30)

Other BLAST [web gateways](#)

All matches to this query

| Score | Mr(calc):   | Delta     | Sequence                        |
|-------|-------------|-----------|---------------------------------|
| 40.4  | 1910.934265 | -0.003463 | <a href="#">SGSDEVQVGQQR</a>    |
| 38.6  | 1910.934265 | -0.003463 | <a href="#">SGSDEVQVGQQR</a>    |
| 32.7  | 1910.938263 | -0.007461 | <a href="#">YVTSAPMPEPQAPGR</a> |
| 1.6   | 1910.934265 | -0.003463 | <a href="#">SGSDEVQVGQQR</a>    |

# MASCOT SCIENCE Mascot Search Results

## Peptide View

MS/MS Fragmentation of **LICQATGFSPR**

Found in **IGHM\_HUMAN**, Ig mu chain C region OS=Homo sapiens GN=IGHM PE=1 SV=3

Match to Query 28738: 1559.793348 from(780.903950,2+) rtinseconds(2012) index(31987)

Title: Locus:1.1.1.3364.9 File:"2013-07-02 CLN FXIII 180 min 3rd F 3.wiff"

Data file C:\Program Files (x86)\Matrix Science\Mascot Daemon\mgf\9 FXIII 180 min 3rd\mascot\_daemon\_merge.mgf

Click mouse within plot area to zoom in by factor of two about that point

Or, Plot from  to  Da

Label all possible matches  Label matches used for scoring

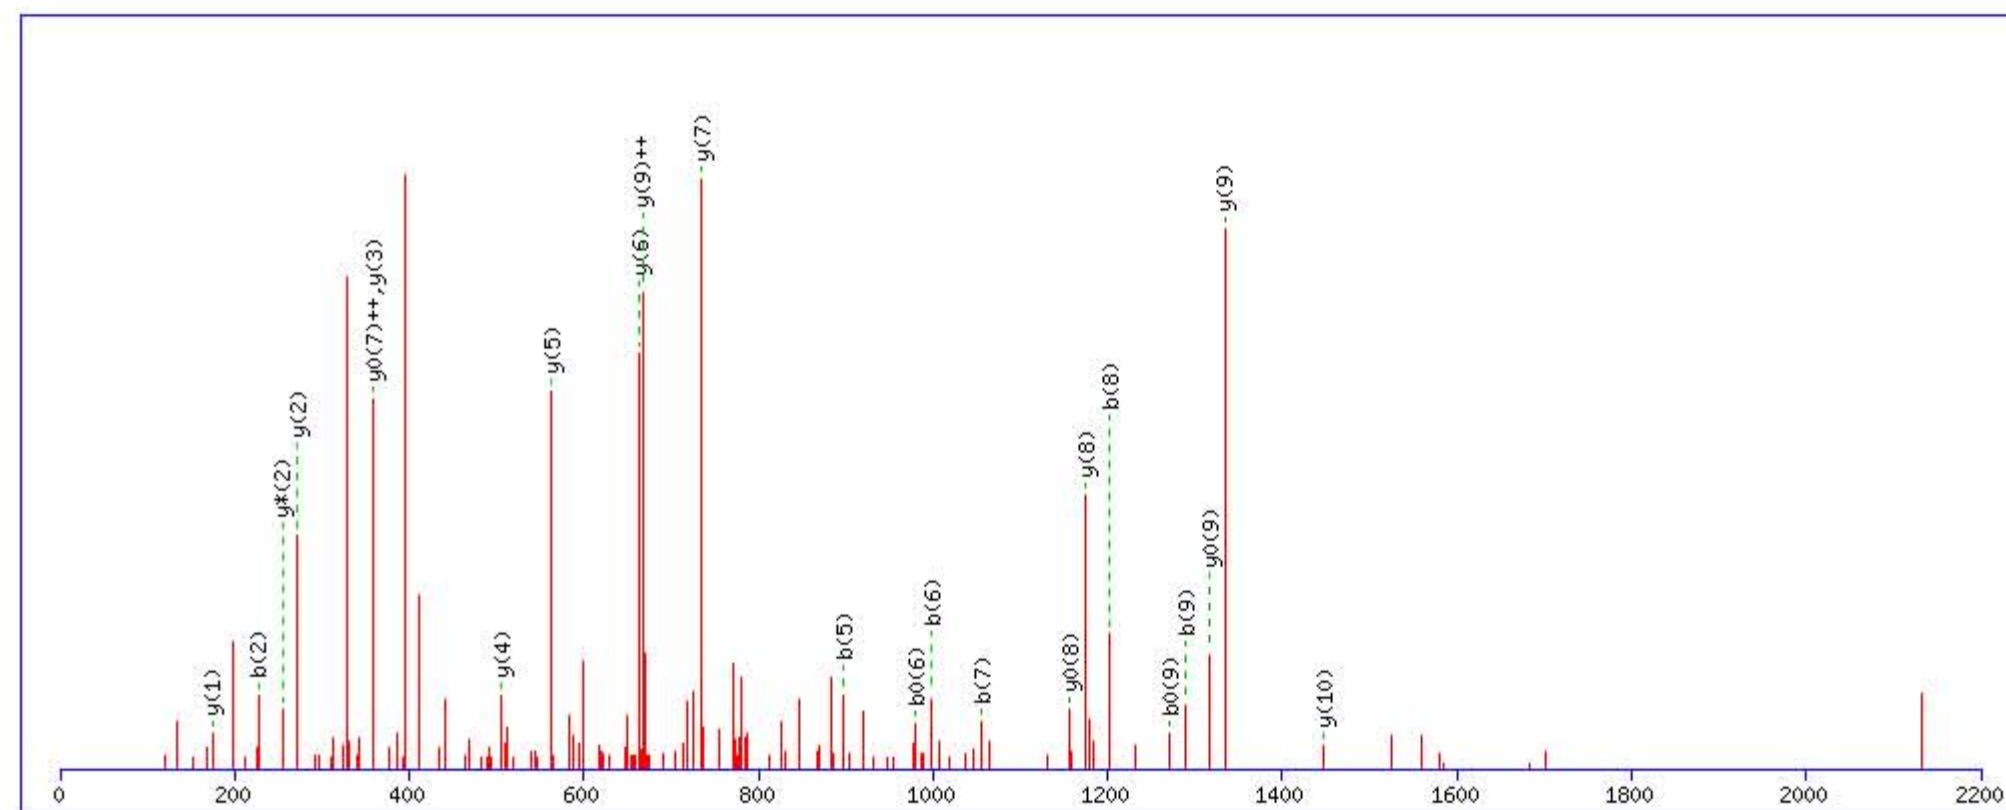

Monoisotopic mass of neutral peptide Mr(calc): 1559.795242

Fixed modifications: Carbamidomethyl (C) (apply to specified residues or termini only)

Variable modifications:

Q4 : Biotin:Thermo-21345 (Q)

Ions Score: 66 Expect: 4.8e-006

Matches : 23/100 fragment ions using 40 most intense peaks [\(help\)](#)

| #  | b                  | b <sup>++</sup> | b <sup>+</sup> | b <sup>+++</sup> | b <sup>0</sup>     | b <sup>0++</sup> | Seq. | y                  | y <sup>++</sup>   | y <sup>+</sup>    | y <sup>+++</sup> | y <sup>0</sup>     | y <sup>0++</sup>  | #  |
|----|--------------------|-----------------|----------------|------------------|--------------------|------------------|------|--------------------|-------------------|-------------------|------------------|--------------------|-------------------|----|
| 1  | 114.091340         | 57.549308       |                |                  |                    |                  | L    |                    |                   |                   |                  |                    |                   | 11 |
| 2  | <b>227.175404</b>  | 114.091340      |                |                  |                    |                  | I    | <b>1447.718454</b> | 724.362865        | 1430.691905       | 715.849591       | 1429.707889        | 715.357583        | 10 |
| 3  | 387.206053         | 194.106664      |                |                  |                    |                  | C    | <b>1334.634390</b> | <b>667.820833</b> | 1317.607841       | 659.307559       | <b>1316.623825</b> | 658.815551        | 9  |
| 4  | 826.431379         | 413.719328      | 809.404830     | 405.206053       |                    |                  | Q    | <b>1174.603741</b> | 587.805509        | 1157.577192       | 579.292234       | <b>1156.593176</b> | 578.800226        | 8  |
| 5  | <b>897.468493</b>  | 449.237885      | 880.441944     | 440.724610       |                    |                  | A    | <b>735.378415</b>  | 368.192846        | 718.351866        | 359.679571       | 717.367850         | <b>359.187563</b> | 7  |
| 6  | <b>998.516172</b>  | 499.761724      | 981.489623     | 491.248449       | <b>980.505607</b>  | 490.756441       | T    | <b>664.341301</b>  | 332.674289        | 647.314752        | 324.161014       | 646.330736         | 323.669006        | 6  |
| 7  | <b>1055.537636</b> | 528.272456      | 1038.511087    | 519.759182       | 1037.527071        | 519.267174       | G    | <b>563.293622</b>  | 282.150449        | 546.267073        | 273.637175       | 545.283057         | 273.145167        | 5  |
| 8  | <b>1202.606050</b> | 601.806663      | 1185.579501    | 593.293389       | 1184.595485        | 592.801381       | F    | <b>506.272158</b>  | 253.639717        | 489.245609        | 245.126443       | 488.261593         | 244.634435        | 4  |
| 9  | <b>1289.638078</b> | 645.322677      | 1272.611529    | 636.809403       | <b>1271.627513</b> | 636.317395       | S    | <b>359.203744</b>  | 180.105510        | 342.177195        | 171.592236       | 341.193179         | 171.100228        | 3  |
| 10 | 1386.690842        | 693.849059      | 1369.664293    | 685.335785       | 1368.680277        | 684.843777       | P    | <b>272.171716</b>  | 136.589496        | <b>255.145167</b> | 128.076221       |                    |                   | 2  |
| 11 |                    |                 |                |                  |                    |                  | R    | <b>175.118952</b>  | 88.063114         | 158.092403        | 79.549839        |                    |                   | 1  |

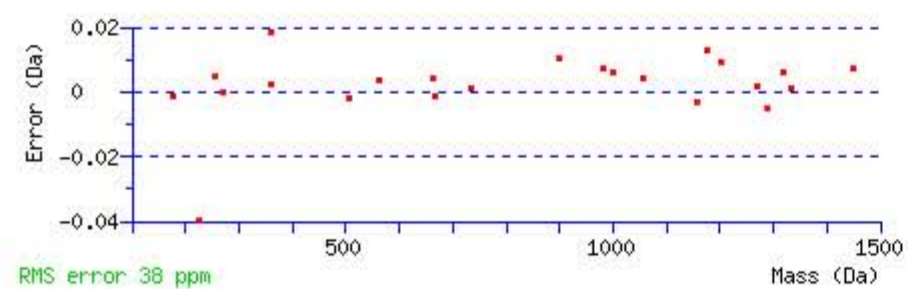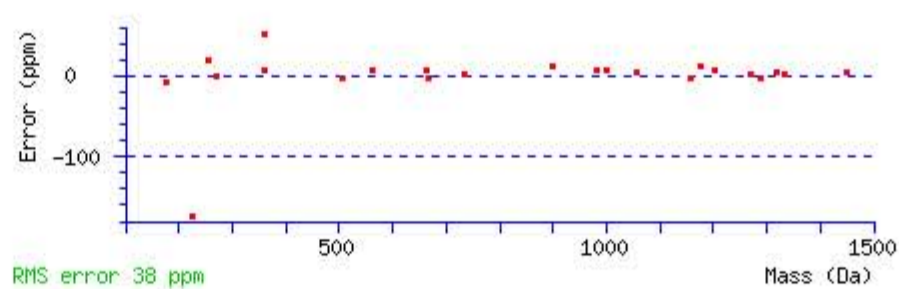

NCBI BLAST search of **LICQATGFSPR**

(Parameters: blastp, nr protein database, expect=20000, no filter, PAM30)

Other BLAST [web gateways](#)

All matches to this query

| Score | Mr(calc):   | Delta     | Sequence                         |
|-------|-------------|-----------|----------------------------------|
| 66.1  | 1559.795242 | -0.001894 | <a href="#">LICQATGFSPR</a>      |
| 8.9   | 1559.808960 | -0.015612 | <a href="#">LDRLSGLADQMVAR</a>   |
| 3.3   | 1559.770081 | 0.023267  | <a href="#">ARCEVQFSPR</a>       |
| 2.5   | 1559.808975 | -0.015627 | <a href="#">LLDRDACDTRVK</a>     |
| 1.7   | 1559.787827 | 0.005521  | <a href="#">SLHPAMLPAADGAGPR</a> |

Mascot: <http://www.matrixscience.com/>

# MASCOT Search Results

## Peptide View

MS/MS Fragmentation of **YVTSAPMPEPQAPGR**

Found in **IGHM\_HUMAN**, Ig mu chain C region OS=Homo sapiens GN=IGHM PE=1 SV=3

Match to Query 37641: 1910.930802 from(637.984210,3+) rtinseconds(1900) index(31109)

Title: Locus:1.1.1.3325.18 File:"2013-07-02 CLN FXIII 180 min 3rd F 3.wiff"

Data file C:\Program Files (x86)\Matrix Science\Mascot Daemon\mgf\9 FXIII 180 min 3rd\mascot\_daemon\_merge.mgf

Click mouse within plot area to zoom in by factor of two about that point

Or, Plot from  to  Da

Label all possible matches  Label matches used for scoring



Monoisotopic mass of neutral peptide  $M_r(\text{calc})$ : 1910.938263

Fixed modifications: Carbamidomethyl (C) (apply to specified residues or termini only)

Variable modifications:

Q11 : Biotin:Thermo-21345 (Q)

Ions Score: 31 Expect: 0.02

Matches : 10/132 fragment ions using 42 most intense peaks [\(help\)](#)

| #  | b           | b <sup>++</sup> | b <sup>*</sup> | b <sup>*++</sup> | b <sup>0</sup> | b <sup>0++</sup> | Seq. | y                  | y <sup>++</sup> | y <sup>*</sup> | y <sup>*++</sup> | y <sup>0</sup> | y <sup>0++</sup> | #  |
|----|-------------|-----------------|----------------|------------------|----------------|------------------|------|--------------------|-----------------|----------------|------------------|----------------|------------------|----|
| 1  | 164.070605  | 82.538940       |                |                  |                |                  | Y    |                    |                 |                |                  |                |                  | 15 |
| 2  | 263.139019  | 132.073148      |                |                  |                |                  | V    | 1748.882225        | 874.944750      | 1731.855676    | 866.431476       | 1730.871660    | 865.939468       | 14 |
| 3  | 364.186698  | 182.596987      |                |                  | 346.176133     | 173.591705       | T    | <b>1649.813811</b> | 825.410543      | 1632.787262    | 816.897269       | 1631.803246    | 816.405261       | 13 |
| 4  | 451.218726  | 226.113001      |                |                  | 433.208161     | 217.107719       | S    | 1548.766132        | 774.886704      | 1531.739583    | 766.373430       | 1530.755567    | 765.881421       | 12 |
| 5  | 522.255840  | 261.631558      |                |                  | 504.245275     | 252.626276       | A    | <b>1461.734104</b> | 731.370690      | 1444.707555    | 722.857416       | 1443.723539    | 722.365407       | 11 |
| 6  | 619.308604  | 310.157940      |                |                  | 601.298039     | 301.152658       | P    | <b>1390.696990</b> | 695.852133      | 1373.670441    | 687.338859       | 1372.686425    | 686.846850       | 10 |
| 7  | 750.349089  | 375.678183      |                |                  | 732.338524     | 366.672900       | M    | 1293.644226        | 647.325751      | 1276.617677    | 638.812477       | 1275.633661    | 638.320468       | 9  |
| 8  | 847.401853  | 424.204565      |                |                  | 829.391288     | 415.199282       | P    | <b>1162.603741</b> | 581.805508      | 1145.577192    | 573.292234       | 1144.593176    | 572.800226       | 8  |
| 9  | 976.444446  | 488.725861      |                |                  | 958.433881     | 479.720579       | E    | <b>1065.550977</b> | 533.279126      | 1048.524428    | 524.765852       | 1047.540412    | 524.273844       | 7  |
| 10 | 1073.497210 | 537.252243      |                |                  | 1055.486645    | 528.246961       | P    | <b>936.508384</b>  | 468.757830      | 919.481835     | 460.244555       |                |                  | 6  |
| 11 | 1512.722536 | 756.864906      | 1495.695987    | 748.351632       | 1494.711971    | 747.859624       | Q    | <b>839.455620</b>  | 420.231448      | 822.429071     | 411.718173       |                |                  | 5  |
| 12 | 1583.759650 | 792.383463      | 1566.733101    | 783.870189       | 1565.749085    | 783.378180       | A    | <b>400.230294</b>  | 200.618785      | 383.203745     | 192.105510       |                |                  | 4  |
| 13 | 1680.812414 | 840.909845      | 1663.785865    | 832.396571       | 1662.801849    | 831.904563       | P    | <b>329.193180</b>  | 165.100228      | 312.166631     | 156.586953       |                |                  | 3  |
| 14 | 1737.833878 | 869.420577      | 1720.807329    | 860.907303       | 1719.823313    | 860.415294       | G    | 232.140416         | 116.573846      | 215.113867     | 108.060571       |                |                  | 2  |
| 15 |             |                 |                |                  |                |                  | R    | <b>175.118952</b>  | 88.063114       | 158.092403     | 79.549839        |                |                  | 1  |

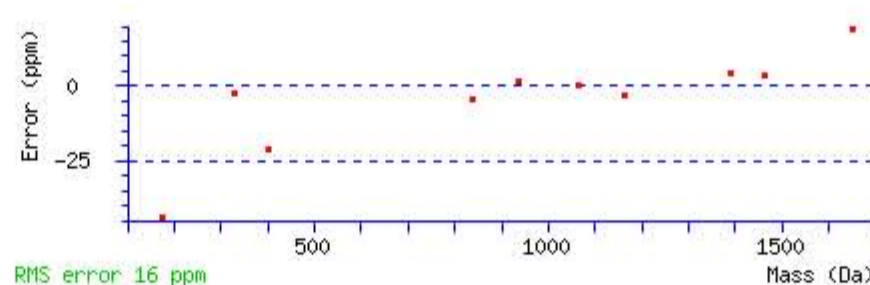

NCBI BLAST search of [YVTSAPMPEPQAPGR](#)

(Parameters: blastp, nr protein database, expect=20000, no filter, PAM30)

Other BLAST [web gateways](#)

## All matches to this query

| Score | $M_r(\text{calc})$ : | Delta     | Sequence                        |
|-------|----------------------|-----------|---------------------------------|
| 30.6  | 1910.938263          | -0.007461 | <a href="#">YVTSAPMPEPQAPGR</a> |
| 22.6  | 1910.934265          | -0.003463 | <a href="#">SGSDEVQVGQQR</a>    |
| 22.6  | 1910.934265          | -0.003463 | <a href="#">SGSDEVQVGQQR</a>    |

# MASCOT Search Results

## Peptide View

MS/MS Fragmentation of **YVTSAPMPEPQAPGR**

Found in **IGHM\_HUMAN**, Ig mu chain C region OS=Homo sapiens GN=IGHM PE=1 SV=3

Match to Query 37642: 1910.930802 from(637.984210,3+) rtinseconds(1891) index(31052)

Title: Locus:1.1.1.3322.9 File:"2013-07-02 CLN FXIII 180 min 3rd F 3.wiff"

Data file C:\Program Files (x86)\Matrix Science\Mascot Daemon\mgf9 FXIII 180 min 3rd\mascot\_daemon\_merge.mgf

Click mouse within plot area to zoom in by factor of two about that point

Or, Plot from  to  Da

Label all possible matches  Label matches used for scoring



Monoisotopic mass of neutral peptide Mr(calc): 1910.938263

Fixed modifications: Carbamidomethyl (C) (apply to specified residues or termini only)

Variable modifications:

Q11 : Biotin:Thermo-21345 (Q)

Ions Score: 33 Expect: 0.012

Matches : 16/132 fragment ions using 58 most intense peaks [\(help\)](#)

| #  | b                  | b <sup>++</sup>   | b <sup>*</sup> | b <sup>*++</sup> | b <sup>0</sup>     | b <sup>0++</sup> | Seq. | y                  | y <sup>++</sup>   | y <sup>*</sup> | y <sup>*++</sup> | y <sup>0</sup> | y <sup>0++</sup> | #  |
|----|--------------------|-------------------|----------------|------------------|--------------------|------------------|------|--------------------|-------------------|----------------|------------------|----------------|------------------|----|
| 1  | 164.070605         | 82.538940         |                |                  |                    |                  | Y    |                    |                   |                |                  |                |                  | 15 |
| 2  | 263.139019         | 132.073148        |                |                  |                    |                  | V    | 1748.882225        | 874.944750        | 1731.855676    | 866.431476       | 1730.871660    | 865.939468       | 14 |
| 3  | 364.186698         | 182.596987        |                |                  | 346.176133         | 173.591705       | T    | 1649.813811        | 825.410543        | 1632.787262    | 816.897269       | 1631.803246    | 816.405261       | 13 |
| 4  | 451.218726         | <b>226.113001</b> |                |                  | 433.208161         | 217.107719       | S    | <b>1548.766132</b> | 774.886704        | 1531.739583    | 766.373430       | 1530.755567    | 765.881421       | 12 |
| 5  | 522.255840         | 261.631558        |                |                  | 504.245275         | 252.626276       | A    | <b>1461.734104</b> | 731.370690        | 1444.707555    | 722.857416       | 1443.723539    | 722.365407       | 11 |
| 6  | 619.308604         | 310.157940        |                |                  | 601.298039         | 301.152658       | P    | <b>1390.696990</b> | 695.852133        | 1373.670441    | 687.338859       | 1372.686425    | 686.846850       | 10 |
| 7  | 750.349089         | 375.678183        |                |                  | 732.338524         | 366.672900       | M    | <b>1293.644226</b> | 647.325751        | 1276.617677    | 638.812477       | 1275.633661    | 638.320468       | 9  |
| 8  | 847.401853         | 424.204565        |                |                  | 829.391288         | 415.199282       | P    | <b>1162.603741</b> | 581.805508        | 1145.577192    | 573.292234       | 1144.593176    | 572.800226       | 8  |
| 9  | 976.444446         | 488.725861        |                |                  | 958.433881         | 479.720579       | E    | <b>1065.550977</b> | 533.279126        | 1048.524428    | 524.765852       | 1047.540412    | 524.273844       | 7  |
| 10 | 1073.497210        | 537.252243        |                |                  | 1055.486645        | 528.246961       | P    | <b>936.508384</b>  | <b>468.757830</b> | 919.481835     | 460.244555       |                |                  | 6  |
| 11 | <b>1512.722536</b> | 756.864906        | 1495.695987    | 748.351632       | 1494.711971        | 747.859624       | Q    | <b>839.455620</b>  | 420.231448        | 822.429071     | 411.718173       |                |                  | 5  |
| 12 | 1583.759650        | 792.383463        | 1566.733101    | 783.870189       | <b>1565.749085</b> | 783.378180       | A    | <b>400.230294</b>  | 200.618785        | 383.203745     | 192.105510       |                |                  | 4  |
| 13 | <b>1680.812414</b> | 840.909845        | 1663.785865    | 832.396571       | 1662.801849        | 831.904563       | P    | <b>329.193180</b>  | 165.100228        | 312.166631     | 156.586953       |                |                  | 3  |
| 14 | 1737.833878        | 869.420577        | 1720.807329    | 860.907303       | 1719.823313        | 860.415294       | G    | 232.140416         | 116.573846        | 215.113867     | 108.060571       |                |                  | 2  |
| 15 |                    |                   |                |                  |                    |                  | R    | <b>175.118952</b>  | 88.063114         | 158.092403     | 79.549839        |                |                  | 1  |

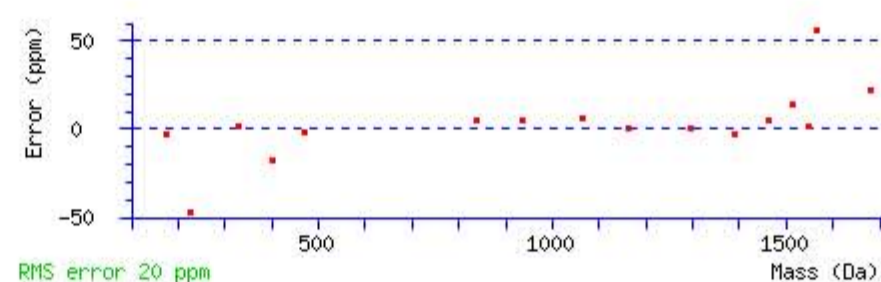

NCBI BLAST search of **YVTSAPMPEPQAPGR**

(Parameters: blastp, nr protein database, expect=20000, no filter, PAM30)

Other BLAST [web gateways](#)

All matches to this query

| Score | Mr(calc):   | Delta     | Sequence                        |
|-------|-------------|-----------|---------------------------------|
| 40.4  | 1910.934265 | -0.003463 | <a href="#">SGSDEVQVGQQR</a>    |
| 38.6  | 1910.934265 | -0.003463 | <a href="#">SGSDEVQVGQQR</a>    |
| 32.7  | 1910.938263 | -0.007461 | <a href="#">YVTSAPMPEPQAPGR</a> |
| 1.6   | 1910.934265 | -0.003463 | <a href="#">SGSDEVQVGQQR</a>    |

# MASCOT Search Results

## Peptide View

MS/MS Fragmentation of **LVDPQGPLK**

Found in **FCGBP\_HUMAN**, IgGFc-binding protein OS=Homo sapiens GN=FCGBP PE=1 SV=3

Match to Query 19711: 1276.716068 from(639.365310,2+) rtinseconds(1909) index(31157)

Title: Locus:1.1.1.3328.15 File:"2013-07-02 CLN FXIII 180 min 3rd F 3.wiff"

Data file C:\Program Files (x86)\Matrix Science\Mascot Daemon\mgf\9 FXIII 180 min 3rd\mascot\_daemon\_merge.mgf

Click mouse within plot area to zoom in by factor of two about that point

Or, Plot from  to  Da

Label all possible matches  Label matches used for scoring

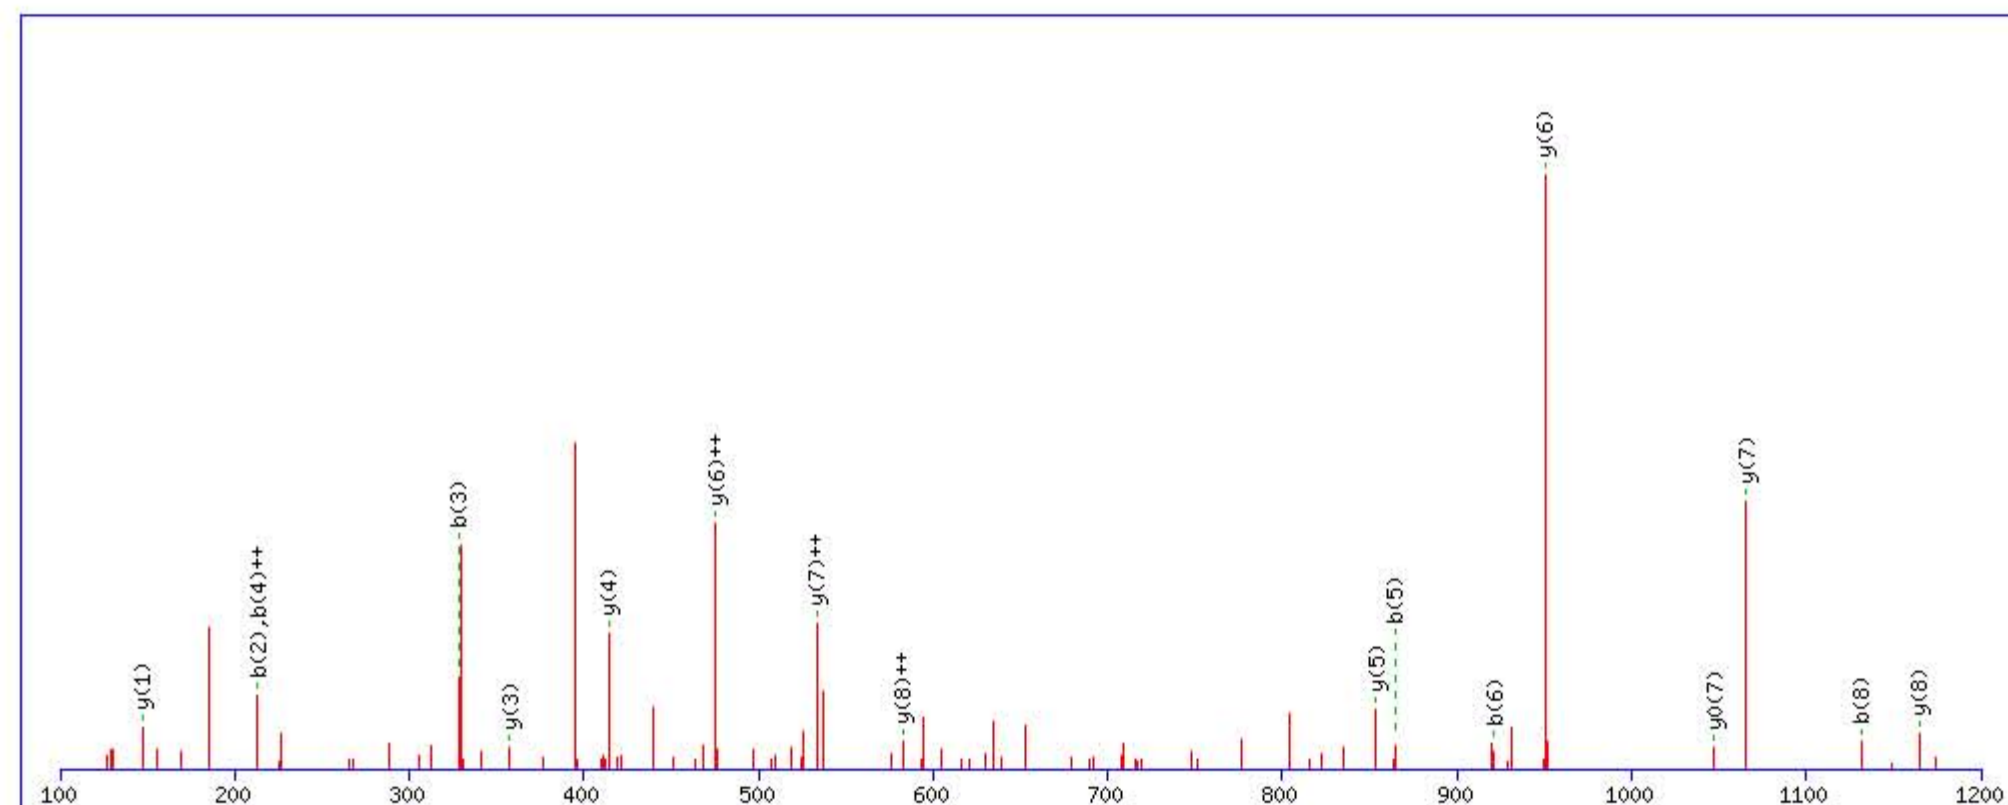

Monoisotopic mass of neutral peptide Mr(calc): 1276.721329

Fixed modifications: Carbamidomethyl (C) (apply to specified residues or termini only)

Variable modifications:

Q5 : Biotin:Thermo-21345 (Q)

Ions Score: 26 Expect: 0.041

Matches : 17/72 fragment ions using 51 most intense peaks ([help](#))

| # | b                  | b <sup>++</sup>   | b <sup>+</sup> | b <sup>+++</sup> | b <sup>0</sup> | b <sup>0++</sup> | Seq. | y                  | y <sup>++</sup>   | y <sup>+</sup> | y <sup>+++</sup> | y <sup>0</sup>     | y <sup>0++</sup> | # |
|---|--------------------|-------------------|----------------|------------------|----------------|------------------|------|--------------------|-------------------|----------------|------------------|--------------------|------------------|---|
| 1 | 114.091340         | 57.549308         |                |                  |                |                  | L    |                    |                   |                |                  |                    |                  | 9 |
| 2 | <b>213.159754</b>  | 107.083515        |                |                  |                |                  | V    | <b>1164.644543</b> | <b>582.825910</b> | 1147.617994    | 574.312635       | 1146.633978        | 573.820627       | 8 |
| 3 | <b>328.186697</b>  | 164.596986        |                |                  | 310.176132     | 155.591704       | D    | <b>1065.576129</b> | <b>533.291703</b> | 1048.549580    | 524.778428       | <b>1047.565564</b> | 524.286420       | 7 |
| 4 | 425.239461         | <b>213.123368</b> |                |                  | 407.228896     | 204.118086       | P    | <b>950.549186</b>  | <b>475.778231</b> | 933.522637     | 467.264956       |                    |                  | 6 |
| 5 | <b>864.464787</b>  | 432.736032        | 847.438238     | 424.222757       | 846.454222     | 423.730749       | Q    | <b>853.496422</b>  | 427.251849        | 836.469873     | 418.738575       |                    |                  | 5 |
| 6 | <b>921.486251</b>  | 461.246764        | 904.459702     | 452.733489       | 903.475686     | 452.241481       | G    | <b>414.271096</b>  | 207.639186        | 397.244547     | 199.125911       |                    |                  | 4 |
| 7 | 1018.539015        | 509.773146        | 1001.512466    | 501.259871       | 1000.528450    | 500.767863       | P    | <b>357.249632</b>  | 179.128454        | 340.223083     | 170.615179       |                    |                  | 3 |
| 8 | <b>1131.623079</b> | 566.315178        | 1114.596530    | 557.801903       | 1113.612514    | 557.309895       | L    | 260.196868         | 130.602072        | 243.170319     | 122.088797       |                    |                  | 2 |
| 9 |                    |                   |                |                  |                |                  | K    | <b>147.112804</b>  | 74.060040         | 130.086255     | 65.546765        |                    |                  | 1 |

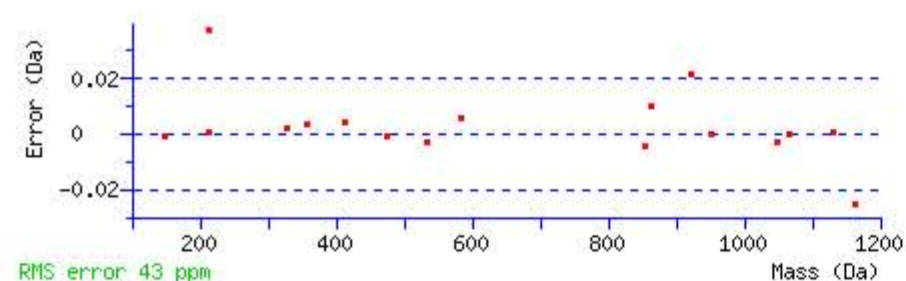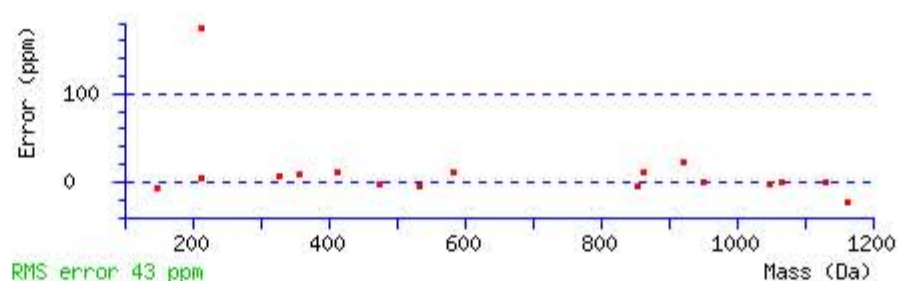

NCBI BLAST search of **LVDPQGPLK**

(Parameters: blastp, nr protein database, expect=20000, no filter, PAM30)

Other BLAST [web gateways](#)

All matches to this query

| Score | Mr(calc):   | Delta     | Sequence                      |
|-------|-------------|-----------|-------------------------------|
| 25.6  | 1276.721329 | -0.005261 | <a href="#">LVDPQGPLK</a>     |
| 13.6  | 1276.706039 | 0.010029  | <a href="#">IVKDLMSKA EK</a>  |
| 12.7  | 1276.706726 | 0.009342  | <a href="#">LVPDSL YVPFK</a>  |
| 5.2   | 1276.713913 | 0.002155  | <a href="#">VIDAKFETKAR</a>   |
| 3.9   | 1276.717941 | -0.001873 | <a href="#">VLLYQPFELR</a>    |
| 2.6   | 1276.698669 | 0.017399  | <a href="#">KTGKSATTALGDK</a> |
| 0.8   | 1276.725128 | -0.009060 | <a href="#">QSL SRLAAYLR</a>  |

# MASCOT Search Results

## Peptide View

MS/MS Fragmentation of **LEDGVQACHATGCGR**

Found in **FCGBP\_HUMAN**, IgGfC-binding protein OS=Homo sapiens GN=FCGBP PE=1 SV=3

Match to Query 38176: 1940.862552 from(647.961460,3+) rtinseconds(1454) index(28510)

Title: Locus:1.1.1.3169.10 File:"2013-07-02 CLN FXIII 180 min 3rd F 3.wiff"

Data file C:\Program Files (x86)\Matrix Science\Mascot Daemon\mgf\9 FXIII 180 min 3rd\mascot\_daemon\_merge.mgf

Click mouse within plot area to zoom in by factor of two about that point

Or, Plot from  to  Da

Label all possible matches  Label matches used for scoring

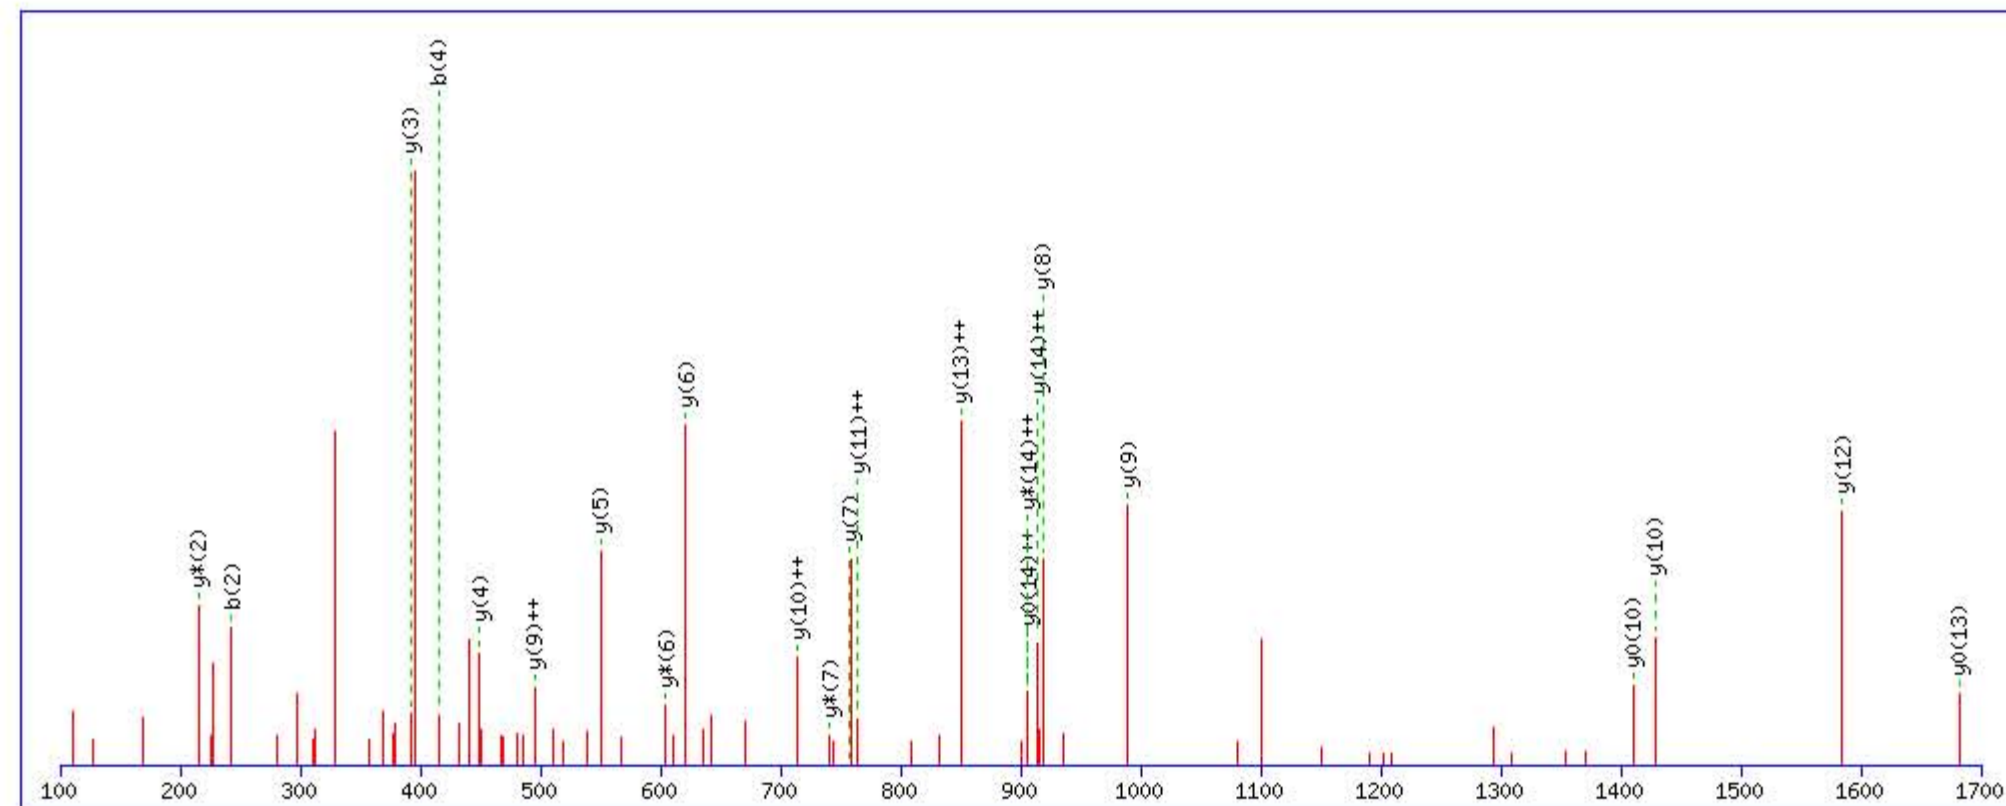

Monoisotopic mass of neutral peptide Mr(calc): 1940.865540

Fixed modifications: Carbamidomethyl (C) (apply to specified residues or termini only)

Variable modifications:

Q6 : Biotin:Thermo-21345 (Q)

Ions Score: 44 Expect: 0.00025

Matches : 23/148 fragment ions using 49 most intense peaks [\(help\)](#)

| #  | b                 | b <sup>++</sup> | b <sup>+</sup> | b <sup>+++</sup> | b <sup>0</sup> | b <sup>0++</sup> | Seq. | y                  | y <sup>++</sup>   | y <sup>+</sup>    | y <sup>+++</sup>  | y <sup>0</sup>     | y <sup>0++</sup>  | #  |
|----|-------------------|-----------------|----------------|------------------|----------------|------------------|------|--------------------|-------------------|-------------------|-------------------|--------------------|-------------------|----|
| 1  | 114.091340        | 57.549308       |                |                  |                |                  | L    |                    |                   |                   |                   |                    |                   | 15 |
| 2  | <b>243.133933</b> | 122.070605      |                |                  | 225.123368     | 113.065322       | E    | 1828.788737        | <b>914.898006</b> | 1811.762188       | <b>906.384732</b> | 1810.778172        | <b>905.892724</b> | 14 |
| 3  | 358.160876        | 179.584076      |                |                  | 340.150311     | 170.578794       | D    | 1699.746144        | <b>850.376710</b> | 1682.719595       | 841.863435        | <b>1681.735579</b> | 841.371427        | 13 |
| 4  | <b>415.182340</b> | 208.094808      |                |                  | 397.171775     | 199.089526       | G    | <b>1584.719201</b> | 792.863238        | 1567.692652       | 784.349964        | 1566.708636        | 783.857956        | 12 |
| 5  | 514.250754        | 257.629015      |                |                  | 496.240189     | 248.623733       | V    | 1527.697737        | <b>764.352506</b> | 1510.671188       | 755.839232        | 1509.687172        | 755.347224        | 11 |
| 6  | 953.476080        | 477.241678      | 936.449531     | 468.728404       | 935.465515     | 468.236396       | Q    | <b>1428.629323</b> | <b>714.818299</b> | 1411.602774       | 706.305025        | <b>1410.618758</b> | 705.813017        | 10 |
| 7  | 1024.513194       | 512.760235      | 1007.486645    | 504.246960       | 1006.502629    | 503.754952       | A    | <b>989.403997</b>  | <b>495.205636</b> | 972.377448        | 486.692362        | 971.393432         | 486.200354        | 9  |
| 8  | 1184.543843       | 592.775559      | 1167.517294    | 584.262285       | 1166.533278    | 583.770277       | C    | <b>918.366883</b>  | 459.687079        | 901.340334        | 451.173805        | 900.356318         | 450.681797        | 8  |
| 9  | 1321.602755       | 661.305015      | 1304.576206    | 652.791741       | 1303.592190    | 652.299733       | H    | <b>758.336234</b>  | 379.671755        | <b>741.309685</b> | 371.158480        | 740.325669         | 370.666472        | 7  |
| 10 | 1392.639869       | 696.823572      | 1375.613320    | 688.310298       | 1374.629304    | 687.818290       | A    | <b>621.277322</b>  | 311.142299        | <b>604.250773</b> | 302.629024        | 603.266757         | 302.137016        | 6  |
| 11 | 1493.687548       | 747.347412      | 1476.660999    | 738.834138       | 1475.676983    | 738.342129       | T    | <b>550.240208</b>  | 275.623742        | 533.213659        | 267.110467        | 532.229643         | 266.618459        | 5  |
| 12 | 1550.709012       | 775.858144      | 1533.682463    | 767.344869       | 1532.698447    | 766.852861       | G    | <b>449.192529</b>  | 225.099902        | 432.165980        | 216.586628        |                    |                   | 4  |
| 13 | 1710.739661       | 855.873468      | 1693.713112    | 847.360194       | 1692.729096    | 846.868186       | C    | <b>392.171065</b>  | 196.589170        | 375.144516        | 188.075896        |                    |                   | 3  |
| 14 | 1767.761125       | 884.384200      | 1750.734576    | 875.870926       | 1749.750560    | 875.378918       | G    | 232.140416         | 116.573846        | <b>215.113867</b> | 108.060571        |                    |                   | 2  |
| 15 |                   |                 |                |                  |                |                  | R    | 175.118952         | 88.063114         | 158.092403        | 79.549839         |                    |                   | 1  |

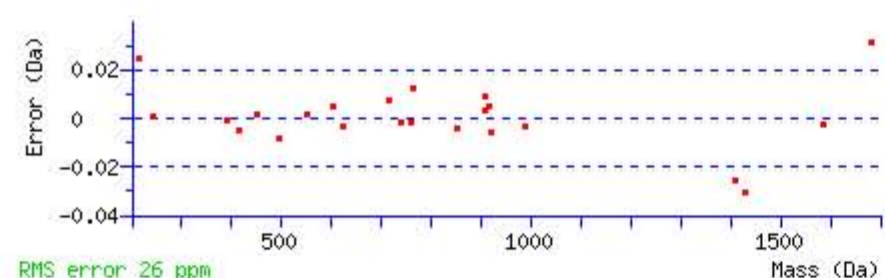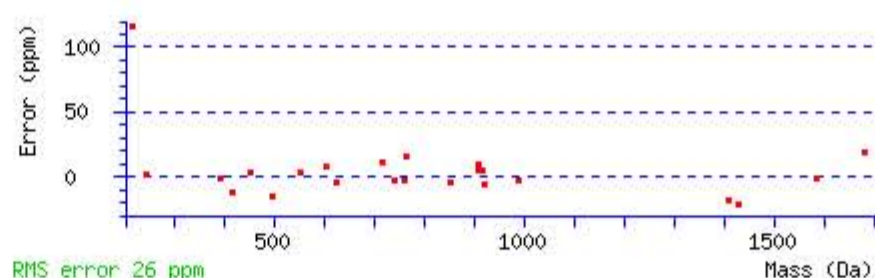

NCBI BLAST search of **LEDGVQACHATGCGR**

(Parameters: blastp, nr protein database, expect=20000, no filter, PAM30)

Other BLAST [web gateways](#)

All matches to this query

| Score | Mr(calc):   | Delta     | Sequence                        |
|-------|-------------|-----------|---------------------------------|
| 43.8  | 1940.865540 | -0.002988 | <a href="#">LEDGVQACHATGCGR</a> |

Mascot: <http://www.matrixscience.com/>



**MASCOT SEARCH RESULTS**

Peptide View

MS/MS Fragmentation of **VVVCQEHSCKPGQVCQPSGGILSCVTK**  
 Found in **FCGBP\_HUMAN**, IgGfC-binding protein OS=Homo sapiens GN=FCGBP PE=1 SV=3

Match to Query 60612: 3635.747496 from(909.944150,4+) rtinseconds(2010) index(31976)  
 Title: Locus:1.1.1.3363.23 File:"2013-07-02 CLN FXIII 180 min 3rd F 3.wiff"  
 Data file C:\Program Files (x86)\Matrix Science\Mascot Daemon\mgf\9 FXIII 180 min 3rd\mascot\_daemon\_merge.mgf

Click mouse within plot area to zoom in by factor of two about that point

Or, Plot from 0 to 3600 Da Full range

Label all possible matches  Label matches used for scoring

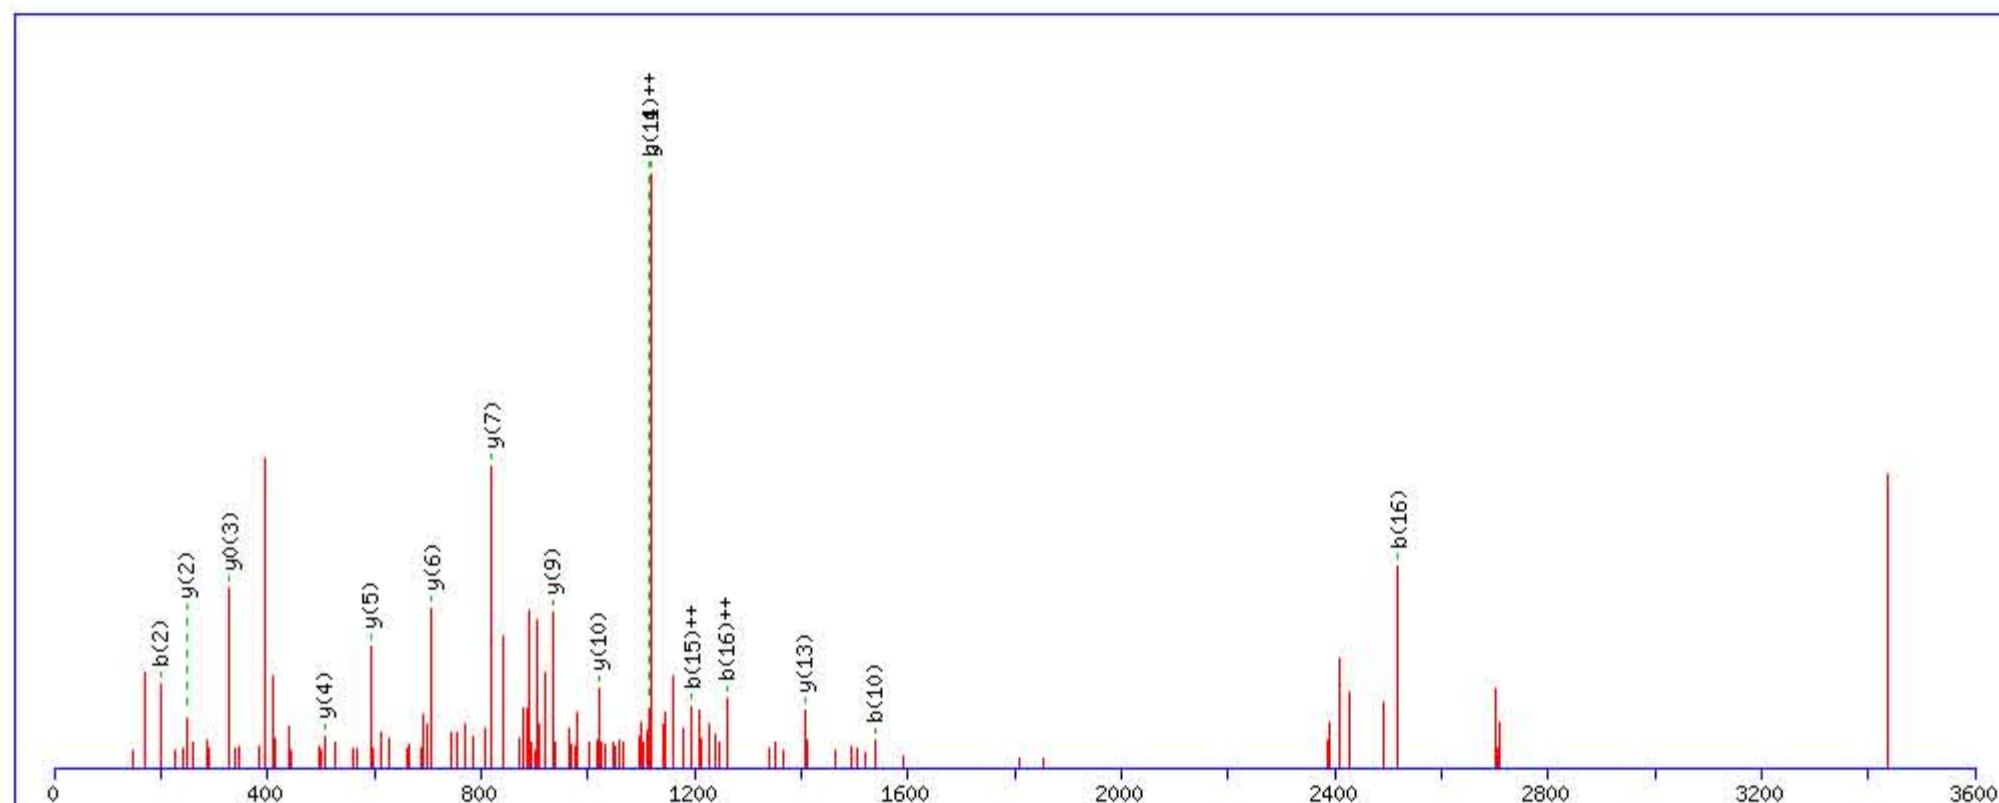

Monoisotopic mass of neutral peptide Mr(calc): 3635.757751  
 Fixed modifications: Carbamidomethyl (C) (apply to specified residues or termini only)  
 Variable modifications:  
 Q5 : Biotin:Thermo-21345 (Q)  
 Q13 : Biotin:Thermo-21345 (Q)  
 Ions Score: 31 Expect: 0.016  
 Matches : 16/292 fragment ions using 38 most intense peaks [\(help\)](#)

| #  | b                  | b <sup>++</sup>    | b <sup>*</sup> | b <sup>*++</sup> | b <sup>0</sup> | b <sup>0++</sup> | Seq. | y                  | y <sup>++</sup> | y <sup>*</sup> | y <sup>*++</sup> | y <sup>0</sup>    | y <sup>0++</sup> | #  |
|----|--------------------|--------------------|----------------|------------------|----------------|------------------|------|--------------------|-----------------|----------------|------------------|-------------------|------------------|----|
| 1  | 100.075690         | 50.541483          |                |                  |                |                  | V    |                    |                 |                |                  |                   |                  | 27 |
| 2  | <b>199.144104</b>  | 100.075690         |                |                  |                |                  | V    | 3537.696565        | 1769.351920     | 3520.670016    | 1760.838646      | 3519.686000       | 1760.346638      | 26 |
| 3  | 298.212518         | 149.609897         |                |                  |                |                  | V    | 3438.628151        | 1719.817713     | 3421.601602    | 1711.304439      | 3420.617586       | 1710.812431      | 25 |
| 4  | 458.243167         | 229.625222         |                |                  |                |                  | C    | 3339.559737        | 1670.283506     | 3322.533188    | 1661.770232      | 3321.549172       | 1661.278224      | 24 |
| 5  | 897.468493         | 449.237885         | 880.441944     | 440.724610       |                |                  | Q    | 3179.529088        | 1590.268182     | 3162.502539    | 1581.754907      | 3161.518523       | 1581.262899      | 23 |
| 6  | 1026.511086        | 513.759181         | 1009.484537    | 505.245907       | 1008.500521    | 504.753899       | E    | 2740.303762        | 1370.655519     | 2723.277213    | 1362.142244      | 2722.293197       | 1361.650236      | 22 |
| 7  | 1163.569998        | 582.288637         | 1146.543449    | 573.775363       | 1145.559433    | 573.283355       | H    | 2611.261169        | 1306.134222     | 2594.234620    | 1297.620948      | 2593.250604       | 1297.128940      | 21 |
| 8  | 1250.602026        | 625.804651         | 1233.575477    | 617.291377       | 1232.591461    | 616.799369       | S    | 2474.202257        | 1237.604766     | 2457.175708    | 1229.091492      | 2456.191692       | 1228.599484      | 20 |
| 9  | 1410.632675        | 705.819976         | 1393.606126    | 697.306701       | 1392.622110    | 696.814693       | C    | 2387.170229        | 1194.088752     | 2370.143680    | 1185.575478      | 2369.159664       | 1185.083470      | 19 |
| 10 | <b>1538.727638</b> | 769.867457         | 1521.701089    | 761.354183       | 1520.717073    | 760.862175       | K    | 2227.139580        | 1114.073428     | 2210.113031    | 1105.560153      | 2209.129015       | 1105.068145      | 18 |
| 11 | 1635.780402        | 818.393839         | 1618.753853    | 809.880565       | 1617.769837    | 809.388557       | P    | 2099.044617        | 1050.025946     | 2082.018068    | 1041.512672      | 2081.034052       | 1041.020664      | 17 |
| 12 | 1692.801866        | 846.904571         | 1675.775317    | 838.391297       | 1674.791301    | 837.899289       | G    | 2001.991853        | 1001.499564     | 1984.965304    | 992.986290       | 1983.981288       | 992.494282       | 16 |
| 13 | 2132.027192        | 1066.517234        | 2115.000643    | 1058.003959      | 2114.016627    | 1057.511951      | Q    | 1944.970389        | 972.988832      | 1927.943840    | 964.475558       | 1926.959824       | 963.983550       | 15 |
| 14 | 2231.095606        | <b>1116.051441</b> | 2214.069057    | 1107.538166      | 2213.085041    | 1107.046158      | V    | 1505.745063        | 753.376169      | 1488.718514    | 744.862895       | 1487.734498       | 744.370887       | 14 |
| 15 | 2391.126255        | <b>1196.066765</b> | 2374.099706    | 1187.553491      | 2373.115690    | 1187.061483      | C    | <b>1406.676649</b> | 703.841962      | 1389.650100    | 695.328688       | 1388.666084       | 694.836680       | 13 |
| 16 | <b>2519.184833</b> | <b>1260.096054</b> | 2502.158284    | 1251.582780      | 2501.174268    | 1251.090772      | Q    | 1246.646000        | 623.826638      | 1229.619451    | 615.313364       | 1228.635435       | 614.821355       | 12 |
| 17 | 2616.237597        | 1308.622436        | 2599.211048    | 1300.109162      | 2598.227032    | 1299.617154      | P    | <b>1118.587422</b> | 559.797349      | 1101.560873    | 551.284074       | 1100.576857       | 550.792066       | 11 |
| 18 | 2703.269625        | 1352.138450        | 2686.243076    | 1343.625176      | 2685.259060    | 1343.133168      | S    | <b>1021.534658</b> | 511.270967      | 1004.508109    | 502.757692       | 1003.524093       | 502.265684       | 10 |
| 19 | 2760.291089        | 1380.649182        | 2743.264540    | 1372.135908      | 2742.280524    | 1371.643900      | G    | <b>934.502630</b>  | 467.754953      | 917.476081     | 459.241678       | 916.492065        | 458.749670       | 9  |
| 20 | 2817.312553        | 1409.159914        | 2800.286004    | 1400.646640      | 2799.301988    | 1400.154632      | G    | 877.481166         | 439.244221      | 860.454617     | 430.730946       | 859.470601        | 430.238938       | 8  |
| 21 | 2930.396617        | 1465.701946        | 2913.370068    | 1457.188672      | 2912.386052    | 1456.696664      | I    | <b>820.459702</b>  | 410.733489      | 803.433153     | 402.220214       | 802.449137        | 401.728206       | 7  |
| 22 | 3043.480681        | 1522.243978        | 3026.454132    | 1513.730704      | 3025.470116    | 1513.238696      | L    | <b>707.375638</b>  | 354.191457      | 690.349089     | 345.678182       | 689.365073        | 345.186174       | 6  |
| 23 | 3130.512709        | 1565.759993        | 3113.486160    | 1557.246718      | 3112.502144    | 1556.754710      | S    | <b>594.291574</b>  | 297.649425      | 577.265025     | 289.136150       | 576.281009        | 288.644142       | 5  |
| 24 | 3290.543358        | 1645.775317        | 3273.516809    | 1637.262042      | 3272.532793    | 1636.770034      | C    | <b>507.259546</b>  | 254.133411      | 490.232997     | 245.620136       | 489.248981        | 245.128128       | 4  |
| 25 | 3389.611772        | 1695.309524        | 3372.585223    | 1686.796249      | 3371.601207    | 1686.304241      | V    | 347.228897         | 174.118086      | 330.202348     | 165.604812       | <b>329.218332</b> | 165.112804       | 3  |
| 26 | 3490.659451        | 1745.833363        | 3473.632902    | 1737.320089      | 3472.648886    | 1736.828081      | T    | <b>248.160483</b>  | 124.583879      | 231.133934     | 116.070605       | 230.149918        | 115.578597       | 2  |
| 27 |                    |                    |                |                  |                |                  | K    | 147.112804         | 74.060040       | 130.086255     | 65.546765        |                   |                  | 1  |

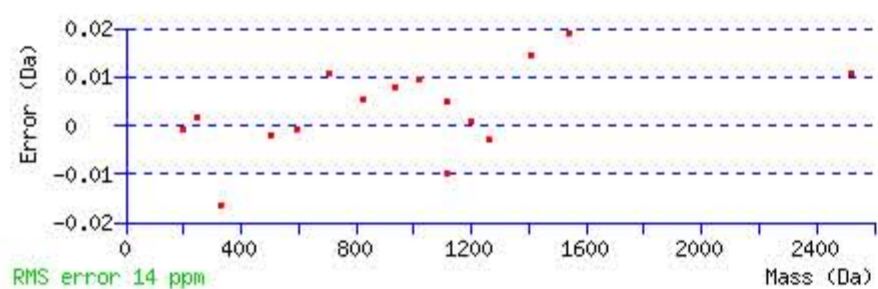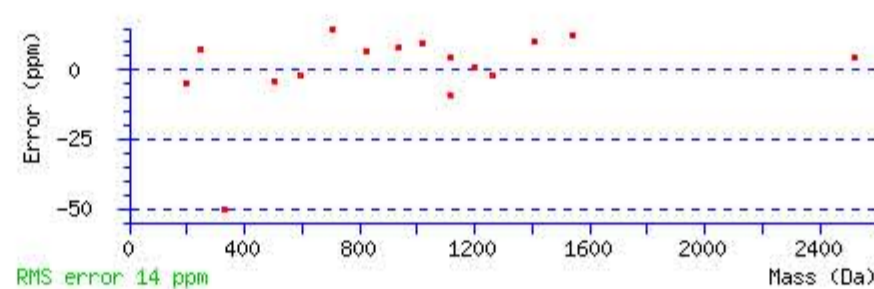

NCBI BLAST search of **VVVCQEHSCKPGQVCQPSGGILSCVTK**  
 (Parameters: blastp, nr protein database, expect=20000, no filter, PAM30)  
 Other BLAST [web gateways](#)

All matches to this query

| Score | Mr(calc):   | Delta     | Sequence                                    |
|-------|-------------|-----------|---------------------------------------------|
| 31.4  | 3635.757751 | -0.010255 | <a href="#">VVVCQEHSCKPGQVCQPSGGILSCVTK</a> |
| 20.4  | 3635.757751 | -0.010255 | <a href="#">VVVCQEHSCKPGQVCQPSGGILSCVTK</a> |
| 20.3  | 3635.757751 | -0.010255 | <a href="#">VVVCQEHSCKPGQVCQPSGGILSCVTK</a> |

# *MATRIX* SCIENCE Mascot Search Results

## Peptide View

MS/MS Fragmentation of **LEQYEGPGFCGPLAPGTGGPFTTCHAHVPPESFFK**

Found in **FCGBP\_HUMAN**, IgGfC-binding protein OS=Homo sapiens GN=FCGBP PE=1 SV=3

Match to Query 63728: 4099.908136 from(1025.984310,4+) rtinseconds(2513) index(34697)

Title: Locus:1.1.1.3538.26 File:"2013-07-02 CLN FXIII 180 min 3rd F 3.wiff"

Data file C:\Program Files (x86)\Matrix Science\Mascot Daemon\mgf\9 FXIII 180 min 3rd\mascot\_daemon\_merge.mgf

Click mouse within plot area to zoom in by factor of two about that point

Or, Plot from  to  Da

Label all possible matches  Label matches used for scoring

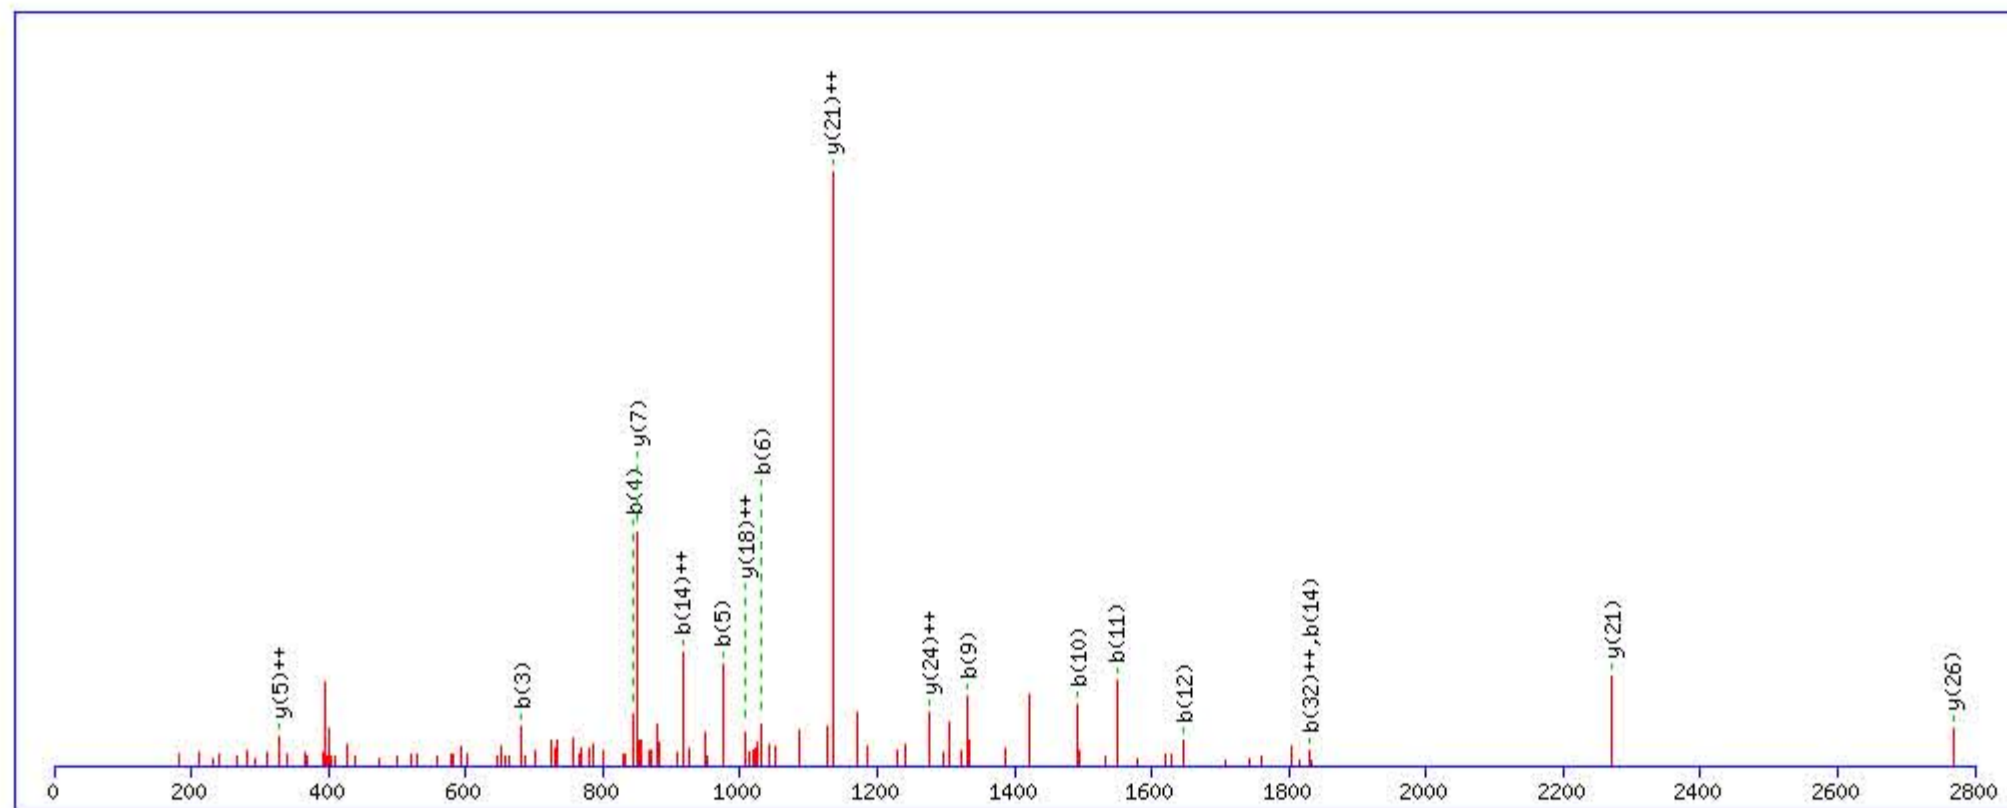

Monoisotopic mass of neutral peptide Mr(calc): 4099.905991

Fixed modifications: Carbamidomethyl (C) (apply to specified residues or termini only)

Variable modifications:

Q3 : Biotin:Thermo-21345 (Q)

Ions Score: 32 Expect: 0.0089

Matches : 18/396 fragment ions using 37 most intense peaks [\(help\)](#)

| #  | b                  | b <sup>++</sup>    | b*          | b <sup>+++</sup> | b <sup>0</sup> | b <sup>0++</sup> | Seq. | y                  | y <sup>++</sup>    | y*          | y <sup>+++</sup> | y <sup>0</sup> | y <sup>0++</sup> | #  |
|----|--------------------|--------------------|-------------|------------------|----------------|------------------|------|--------------------|--------------------|-------------|------------------|----------------|------------------|----|
| 1  | 114.091340         | 57.549308          |             |                  |                |                  | L    |                    |                    |             |                  |                |                  | 35 |
| 2  | 243.133933         | 122.070605         |             |                  | 225.123368     | 113.065322       | E    | 3987.829155        | 1994.418215        | 3970.802606 | 1985.904941      | 3969.818590    | 1985.412933      | 34 |
| 3  | <b>682.359259</b>  | 341.683268         | 665.332710  | 333.169993       | 664.348694     | 332.677985       | Q    | 3858.786562        | 1929.896919        | 3841.760013 | 1921.383644      | 3840.775997    | 1920.891636      | 33 |
| 4  | <b>845.422588</b>  | 423.214932         | 828.396039  | 414.701658       | 827.412023     | 414.209650       | Y    | 3419.561236        | 1710.284256        | 3402.534687 | 1701.770981      | 3401.550671    | 1701.278973      | 32 |
| 5  | <b>974.465181</b>  | 487.736229         | 957.438632  | 479.222954       | 956.454616     | 478.730946       | E    | 3256.497907        | 1628.752591        | 3239.471358 | 1620.239317      | 3238.487342    | 1619.747309      | 31 |
| 6  | <b>1031.486645</b> | 516.246961         | 1014.460096 | 507.733686       | 1013.476080    | 507.241678       | G    | 3127.455314        | 1564.231295        | 3110.428765 | 1555.718020      | 3109.444749    | 1555.226012      | 30 |
| 7  | 1128.539409        | 564.773343         | 1111.512860 | 556.260068       | 1110.528844    | 555.768060       | P    | 3070.433850        | 1535.720563        | 3053.407301 | 1527.207288      | 3052.423285    | 1526.715280      | 29 |
| 8  | 1185.560873        | 593.284075         | 1168.534324 | 584.770800       | 1167.550308    | 584.278792       | G    | 2973.381086        | 1487.194181        | 2956.354537 | 1478.680906      | 2955.370521    | 1478.188898      | 28 |
| 9  | <b>1332.629287</b> | 666.818282         | 1315.602738 | 658.305007       | 1314.618722    | 657.812999       | F    | 2916.359622        | 1458.683449        | 2899.333073 | 1450.170174      | 2898.349057    | 1449.678166      | 27 |
| 10 | <b>1492.659936</b> | 746.833606         | 1475.633387 | 738.320332       | 1474.649371    | 737.828324       | C    | <b>2769.291208</b> | 1385.149242        | 2752.264659 | 1376.635967      | 2751.280643    | 1376.143959      | 26 |
| 11 | <b>1549.681400</b> | 775.344338         | 1532.654851 | 766.831064       | 1531.670835    | 766.339056       | G    | 2609.260559        | 1305.133917        | 2592.234010 | 1296.620643      | 2591.249994    | 1296.128635      | 25 |
| 12 | <b>1646.734164</b> | 823.870720         | 1629.707615 | 815.357446       | 1628.723599    | 814.865438       | P    | 2552.239095        | <b>1276.623185</b> | 2535.212546 | 1268.109911      | 2534.228530    | 1267.617903      | 24 |
| 13 | 1759.818228        | 880.412752         | 1742.791679 | 871.899478       | 1741.807663    | 871.407470       | L    | 2455.186331        | 1228.096803        | 2438.159782 | 1219.583529      | 2437.175766    | 1219.091521      | 23 |
| 14 | <b>1830.855342</b> | <b>915.931309</b>  | 1813.828793 | 907.418035       | 1812.844777    | 906.926027       | A    | 2342.102267        | 1171.554771        | 2325.075718 | 1163.041497      | 2324.091702    | 1162.549489      | 22 |
| 15 | 1927.908106        | 964.457691         | 1910.881557 | 955.944417       | 1909.897541    | 955.452409       | P    | <b>2271.065153</b> | <b>1136.036214</b> | 2254.038604 | 1127.522940      | 2253.054588    | 1127.030932      | 21 |
| 16 | 1984.929570        | 992.968423         | 1967.903021 | 984.455149       | 1966.919005    | 983.963141       | G    | 2174.012389        | 1087.509832        | 2156.985840 | 1078.996558      | 2156.001824    | 1078.504550      | 20 |
| 17 | 2085.977249        | 1043.492262        | 2068.950700 | 1034.978988      | 2067.966684    | 1034.486980      | T    | 2116.990925        | 1058.999100        | 2099.964376 | 1050.485826      | 2098.980360    | 1049.993818      | 19 |
| 18 | 2142.998713        | 1072.002994        | 2125.972164 | 1063.489720      | 2124.988148    | 1062.997712      | G    | 2015.943246        | <b>1008.475261</b> | 1998.916697 | 999.961986       | 1997.932681    | 999.469978       | 18 |
| 19 | 2200.020177        | 1100.513726        | 2182.993628 | 1092.000452      | 2182.009612    | 1091.508444      | G    | 1958.921782        | 979.964529         | 1941.895233 | 971.451254       | 1940.911217    | 970.959246       | 17 |
| 20 | 2297.072941        | 1149.040108        | 2280.046392 | 1140.526834      | 2279.062376    | 1140.034826      | P    | 1901.900318        | 951.453797         | 1884.873769 | 942.940522       | 1883.889753    | 942.448514       | 16 |
| 21 | 2444.141355        | 1222.574315        | 2427.114806 | 1214.061041      | 2426.130790    | 1213.569033      | F    | 1804.847554        | 902.927415         | 1787.821005 | 894.414140       | 1786.836989    | 893.922132       | 15 |
| 22 | 2545.189034        | 1273.098155        | 2528.162485 | 1264.584880      | 2527.178469    | 1264.092872      | T    | 1657.779140        | 829.393208         | 1640.752591 | 820.879933       | 1639.768575    | 820.387925       | 14 |
| 23 | 2646.236713        | 1323.621994        | 2629.210164 | 1315.108720      | 2628.226148    | 1314.616712      | T    | 1556.731461        | 778.869368         | 1539.704912 | 770.356094       | 1538.720896    | 769.864086       | 13 |
| 24 | 2806.267362        | 1403.637319        | 2789.240813 | 1395.124044      | 2788.256797    | 1394.632036      | C    | 1455.683782        | 728.345529         | 1438.657233 | 719.832254       | 1437.673217    | 719.340246       | 12 |
| 25 | 2943.326274        | 1472.166775        | 2926.299725 | 1463.653500      | 2925.315709    | 1463.161492      | H    | 1295.653133        | 648.330205         | 1278.626584 | 639.816930       | 1277.642568    | 639.324922       | 11 |
| 26 | 3014.363388        | 1507.685332        | 2997.336839 | 1499.172057      | 2996.352823    | 1498.680049      | A    | 1158.594221        | 579.800749         | 1141.567672 | 571.287474       | 1140.583656    | 570.795466       | 10 |
| 27 | 3151.422300        | 1576.214788        | 3134.395751 | 1567.701513      | 3133.411735    | 1567.209505      | H    | 1087.557107        | 544.282191         | 1070.530558 | 535.768917       | 1069.546542    | 535.276909       | 9  |
| 28 | 3250.490714        | 1625.748995        | 3233.464165 | 1617.235720      | 3232.480149    | 1616.743712      | V    | 950.498195         | 475.752735         | 933.471646  | 467.239461       | 932.487630     | 466.747453       | 8  |
| 29 | 3347.543478        | 1674.275377        | 3330.516929 | 1665.762102      | 3329.532913    | 1665.270094      | P    | <b>851.429781</b>  | 426.218529         | 834.403232  | 417.705254       | 833.419216     | 417.213246       | 7  |
| 30 | 3444.596242        | 1722.801759        | 3427.569693 | 1714.288484      | 3426.585677    | 1713.796476      | P    | 754.377017         | 377.692147         | 737.350468  | 369.178872       | 736.366452     | 368.686864       | 6  |
| 31 | 3573.638835        | 1787.323055        | 3556.612286 | 1778.809781      | 3555.628270    | 1778.317773      | E    | 657.324253         | <b>329.165765</b>  | 640.297704  | 320.652490       | 639.313688     | 320.160482       | 5  |
| 32 | 3660.670863        | <b>1830.839069</b> | 3643.644314 | 1822.325795      | 3642.660298    | 1821.833787      | S    | 528.281660         | 264.644468         | 511.255111  | 256.131193       | 510.271095     | 255.639185       | 4  |
| 33 | 3807.739277        | 1904.373276        | 3790.712728 | 1895.860002      | 3789.728712    | 1895.367994      | F    | 441.249632         | 221.128454         | 424.223083  | 212.615179       |                |                  | 3  |
| 34 | 3954.807691        | 1977.907483        | 3937.781142 | 1969.394209      | 3936.797126    | 1968.902201      | F    | 294.181218         | 147.594247         | 277.154669  | 139.080972       |                |                  | 2  |
| 35 |                    |                    |             |                  |                |                  | K    | 147.112804         | 74.060040          | 130.086255  | 65.546765        |                |                  | 1  |

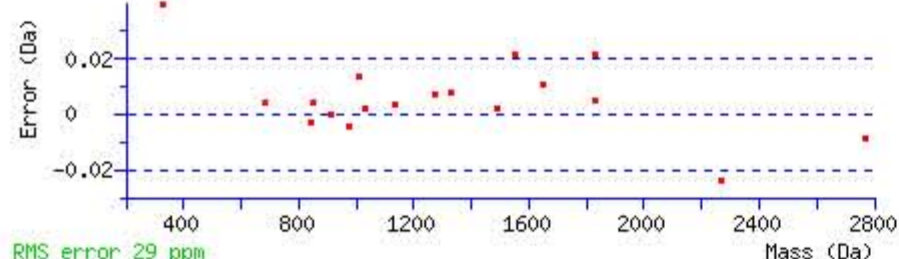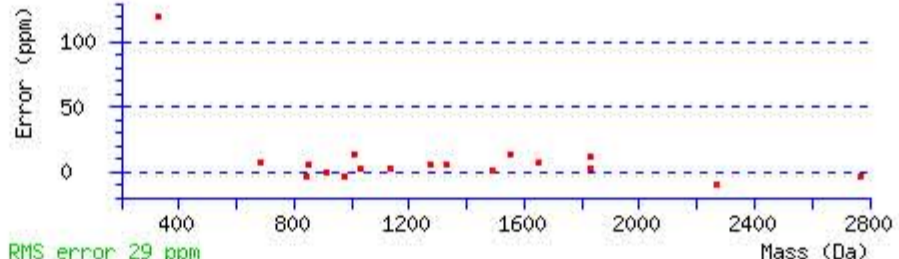

NCBI BLAST search of [LEQYEGPGFCGPLAPGTGGPFTTCHAHVPPESFFK](#)

(Parameters: blastp, nr protein database, expect=20000, no filter, PAM30)

Other BLAST [web gateways](#)

## All matches to this query

| Score | Mr(calc):   | Delta    | Sequence                                            |
|-------|-------------|----------|-----------------------------------------------------|
| 32.0  | 4099.905991 | 0.002145 | <a href="#">LEQYEGPGFCGPLAPGTGGPFTTCHAHVPPESFFK</a> |

# MASCOT Search Results

## Peptide View

MS/MS Fragmentation of **DFALQNPSAVPR**

Found in **ALS\_HUMAN**, Insulin-like growth factor-binding protein complex acid labile subunit OS=Homo sapiens GN=IGFALS PE=1 SV=1

Match to Query 31602: 1624.832108 from(813.423330,2+) rtinseconds(2181) index(32936)

Title: Locus:1.1.1.3423.9 File:"2013-07-02 CLN FXIII 180 min 3rd F 3.wiff"

Data file C:\Program Files (x86)\Matrix Science\Mascot Daemon\mgf9 FXIII 180 min 3rd\mascot\_daemon\_merge.mgf

Click mouse within plot area to zoom in by factor of two about that point

Or, Plot from  to  Da

Label all possible matches  Label matches used for scoring

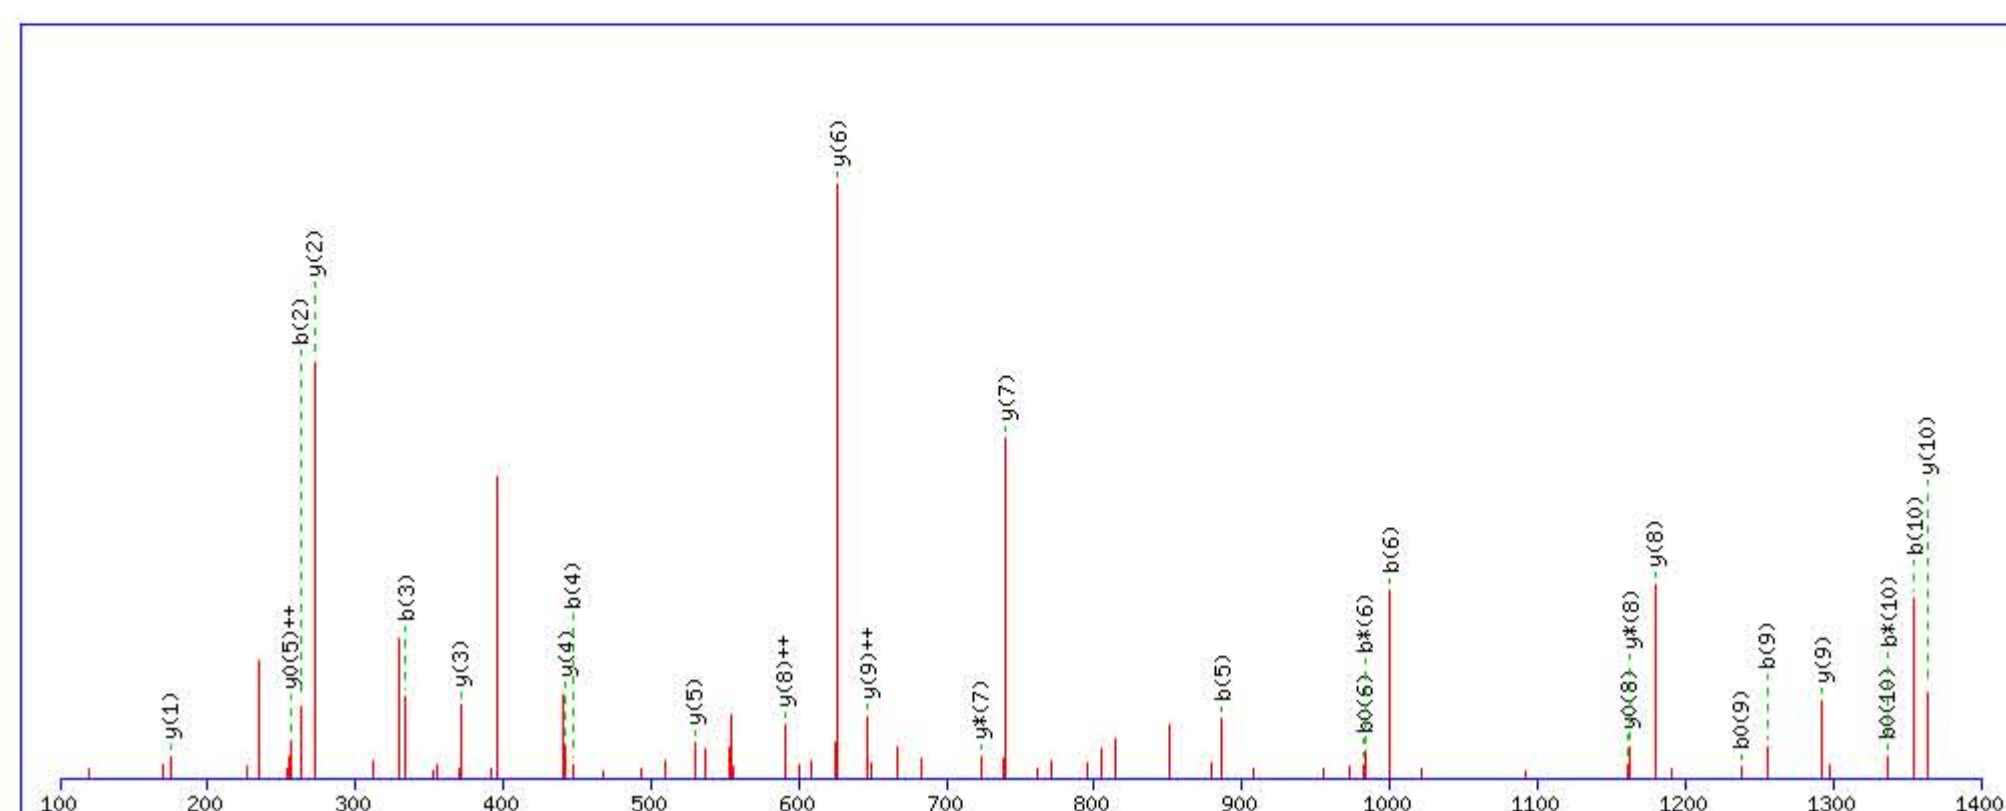

Monoisotopic mass of neutral peptide Mr(calc): 1624.839539

Fixed modifications: Carbamidomethyl (C) (apply to specified residues or termini only)

Variable modifications:

Q5 : Biotin:Thermo-21345 (Q)

Ions Score: 65 Expect: 7e-006

Matches : 28/116 fragment ions using 49 most intense peaks [\(help\)](#)

| #  | b                  | b <sup>++</sup> | b <sup>*</sup>     | b <sup>***</sup> | b <sup>0</sup>     | b <sup>0++</sup> | Seq. | y                  | y <sup>++</sup>   | y <sup>*</sup>     | y <sup>***</sup> | y <sup>0</sup>     | y <sup>0++</sup>  | #  |
|----|--------------------|-----------------|--------------------|------------------|--------------------|------------------|------|--------------------|-------------------|--------------------|------------------|--------------------|-------------------|----|
| 1  | 116.034219         | 58.520748       |                    |                  | 98.023654          | 49.515465        | D    |                    |                   |                    |                  |                    |                   | 12 |
| 2  | <b>263.102633</b>  | 132.054954      |                    |                  | 245.092068         | 123.049672       | F    | 1510.819881        | 755.913579        | 1493.793332        | 747.400304       | 1492.809316        | 746.908296        | 11 |
| 3  | <b>334.139747</b>  | 167.573512      |                    |                  | 316.129182         | 158.568229       | A    | <b>1363.751467</b> | 682.379372        | 1346.724918        | 673.866097       | 1345.740902        | 673.374089        | 10 |
| 4  | <b>447.223811</b>  | 224.115544      |                    |                  | 429.213246         | 215.110261       | L    | <b>1292.714353</b> | <b>646.860815</b> | 1275.687804        | 638.347540       | 1274.703788        | 637.855532        | 9  |
| 5  | <b>886.449137</b>  | 443.728207      | 869.422588         | 435.214932       | 868.438572         | 434.722924       | Q    | <b>1179.630289</b> | <b>590.318783</b> | <b>1162.603740</b> | 581.805508       | <b>1161.619724</b> | 581.313500        | 8  |
| 6  | <b>1000.492064</b> | 500.749670      | <b>983.465515</b>  | 492.236396       | <b>982.481499</b>  | 491.744388       | N    | <b>740.404963</b>  | 370.706120        | <b>723.378414</b>  | 362.192845       | 722.394398         | 361.700837        | 7  |
| 7  | 1097.544828        | 549.276052      | 1080.518279        | 540.762778       | 1079.534263        | 540.270770       | P    | <b>626.362036</b>  | 313.684656        | 609.335487         | 305.171382       | 608.351471         | 304.679374        | 6  |
| 8  | 1184.576856        | 592.792066      | 1167.550307        | 584.278792       | 1166.566291        | 583.786784       | S    | <b>529.309272</b>  | 265.158274        | 512.282723         | 256.645000       | 511.298707         | <b>256.152992</b> | 5  |
| 9  | <b>1255.613970</b> | 628.310623      | 1238.587421        | 619.797349       | <b>1237.603405</b> | 619.305341       | A    | <b>442.277244</b>  | 221.642260        | 425.250695         | 213.128986       |                    |                   | 4  |
| 10 | <b>1354.682384</b> | 677.844830      | <b>1337.655835</b> | 669.331556       | <b>1336.671819</b> | 668.839548       | V    | <b>371.240130</b>  | 186.123703        | 354.213581         | 177.610429       |                    |                   | 3  |
| 11 | 1451.735148        | 726.371212      | 1434.708599        | 717.857938       | 1433.724583        | 717.365930       | P    | <b>272.171716</b>  | 136.589496        | 255.145167         | 128.076221       |                    |                   | 2  |
| 12 |                    |                 |                    |                  |                    |                  | R    | <b>175.118952</b>  | 88.063114         | 158.092403         | 79.549839        |                    |                   | 1  |

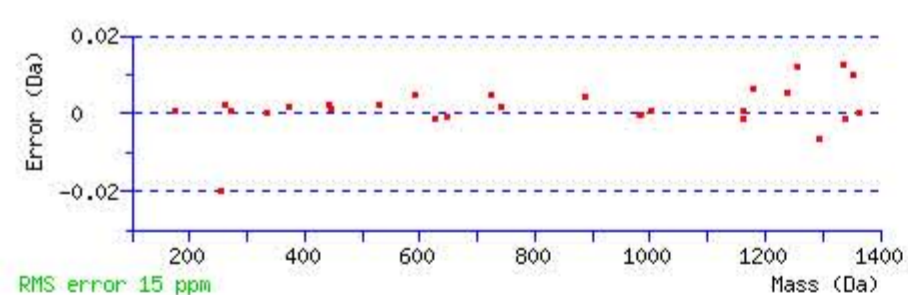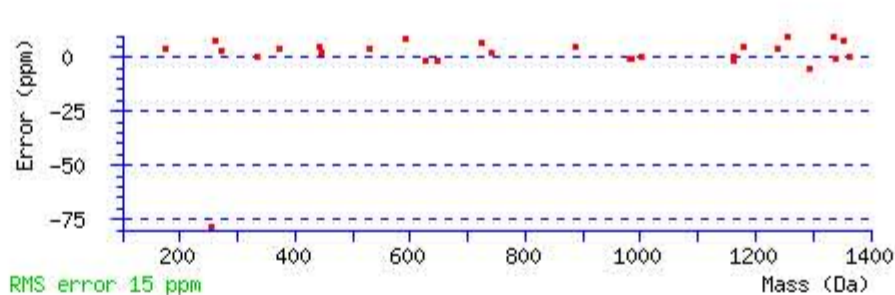

NCBI BLAST search of **DFALQNPSAVPR**

(Parameters: blastp, nr protein database, expect=20000, no filter, PAM30)

Other BLAST [web gateways](#)

All matches to this query

| Score | Mr(calc):   | Delta     | Sequence                          |
|-------|-------------|-----------|-----------------------------------|
| 65.3  | 1624.839539 | -0.007431 | <a href="#">DFALQNPSAVPR</a>      |
| 13.8  | 1624.853271 | -0.021163 | <a href="#">ASDPVRTGSEGLALPR</a>  |
| 9.2   | 1624.816406 | 0.015702  | <a href="#">SVMIGTALNTSEMKK</a>   |
| 5.5   | 1624.854813 | -0.022705 | <a href="#">QWVAAGGHITFK</a>      |
| 3.8   | 1624.832092 | 0.000016  | <a href="#">AAAAAAALESWQAAAPR</a> |
| 2.4   | 1624.820892 | 0.011216  | <a href="#">SSISNNYLNLTFFPR</a>   |
| 2.3   | 1624.829636 | 0.002472  | <a href="#">NVDKWLWMLGAHR</a>     |
| 2.2   | 1624.850296 | -0.018188 | <a href="#">QQLQMEVK</a>          |
| 1.6   | 1624.817062 | 0.015046  | <a href="#">GYYLEMLIGTPPOK</a>    |
| 0.5   | 1624.850784 | -0.018676 | <a href="#">FCSFLQTSKVRPR</a>     |

Mascot: <http://www.matrixscience.com/>

# MASCOT Search Results

## Peptide View

MS/MS Fragmentation of **LAELPADALGPLQR**

Found in **ALS\_HUMAN**, Insulin-like growth factor-binding protein complex acid labile subunit OS=Homo sapiens GN=IGFALS PE=1 SV=1

Match to Query 35240: 1773.978348 from(887.996450,2+) rtinseconds(2483) index(34445)

Title: Locus:1.1.1.3528.20 File:"2013-07-02 CLN FXIII 180 min 3rd F 3.wiff"

Data file C:\Program Files (x86)\Matrix Science\Mascot Daemon\mgf\9 FXIII 180 min 3rd\mascot\_daemon\_merge.mgf

Click mouse within plot area to zoom in by factor of two about that point

Or, Plot from  to  Da

Label all possible matches  Label matches used for scoring

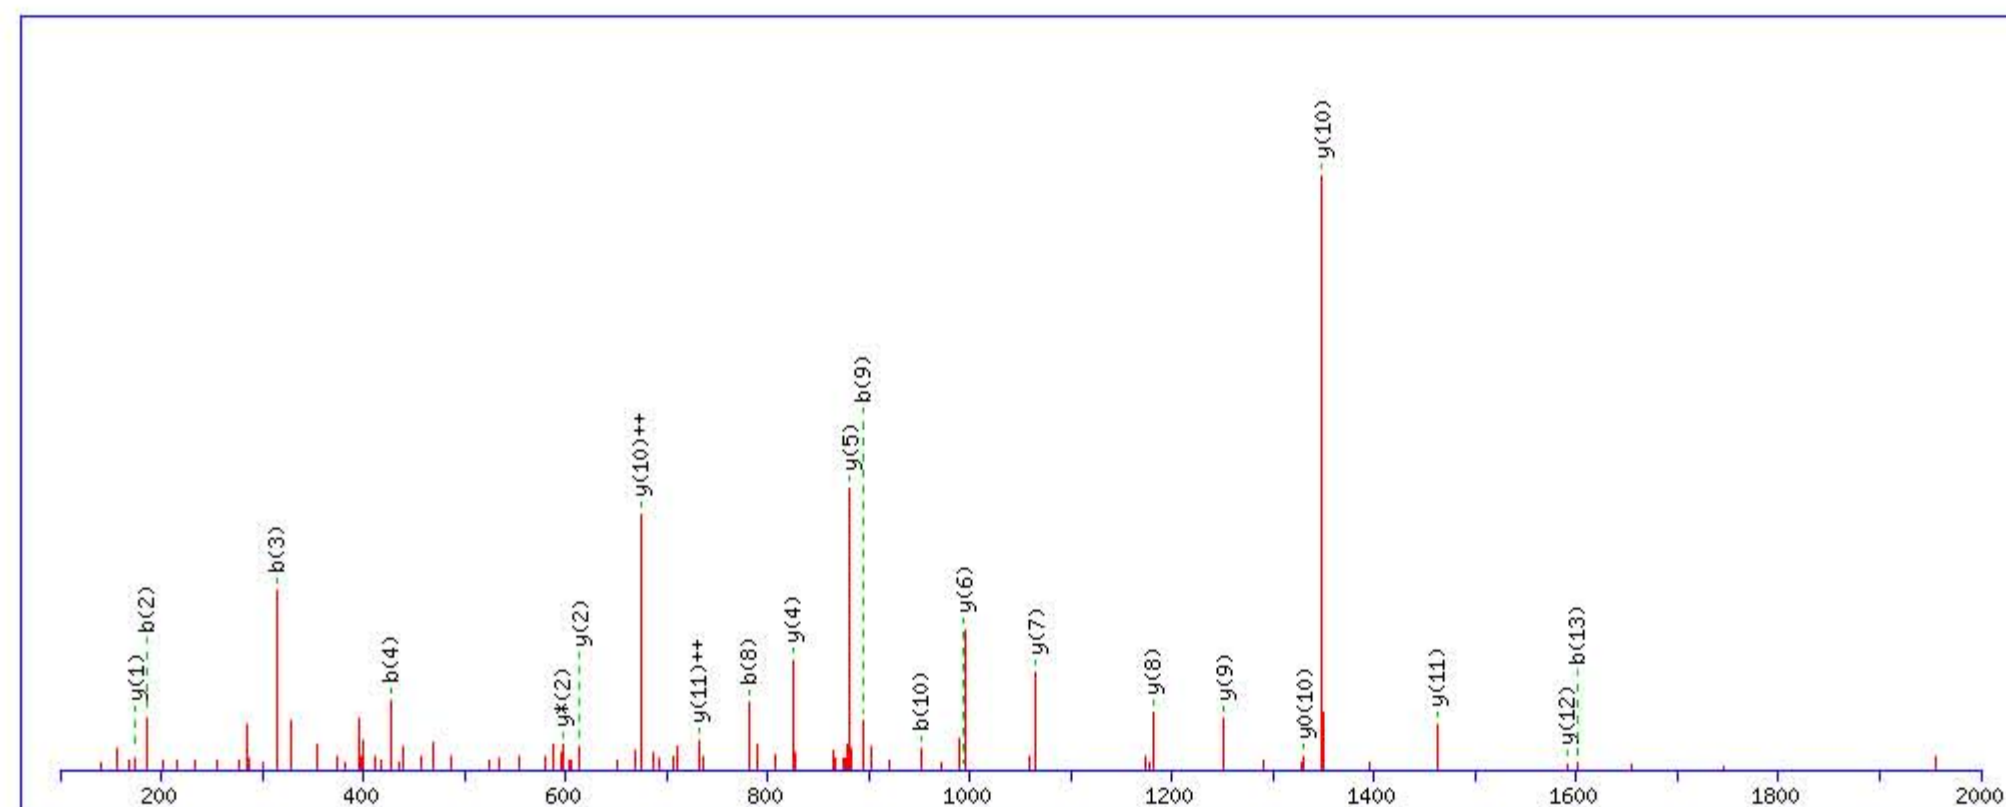

Monoisotopic mass of neutral peptide Mr(calc): 1773.981094

Fixed modifications: Carbamidomethyl (C) (apply to specified residues or termini only)

Variable modifications:

Q13 : Biotin:Thermo-21345 (Q)

Ions Score: 70 Expect: 4.4e-007

Matches : 22/114 fragment ions using 44 most intense peaks [\(help\)](#)

| #  | b                  | b <sup>++</sup> | b <sup>+</sup> | b <sup>+++</sup> | b <sup>0</sup> | b <sup>0++</sup> | Seq. | y                  | y <sup>++</sup>   | y <sup>+</sup>    | y <sup>+++</sup> | y <sup>0</sup>     | y <sup>0++</sup> | #  |
|----|--------------------|-----------------|----------------|------------------|----------------|------------------|------|--------------------|-------------------|-------------------|------------------|--------------------|------------------|----|
| 1  | 114.091340         | 57.549308       |                |                  |                |                  | L    |                    |                   |                   |                  |                    |                  | 14 |
| 2  | <b>185.128454</b>  | 93.067865       |                |                  |                |                  | A    | 1661.904340        | 831.455808        | 1644.877791       | 822.942534       | 1643.893775        | 822.450526       | 13 |
| 3  | <b>314.171047</b>  | 157.589161      |                |                  | 296.160482     | 148.583879       | E    | <b>1590.867226</b> | 795.937251        | 1573.840677       | 787.423977       | 1572.856661        | 786.931969       | 12 |
| 4  | <b>427.255111</b>  | 214.131193      |                |                  | 409.244546     | 205.125911       | L    | <b>1461.824633</b> | <b>731.415955</b> | 1444.798084       | 722.902680       | 1443.814068        | 722.410672       | 11 |
| 5  | 524.307875         | 262.657576      |                |                  | 506.297310     | 253.652293       | P    | <b>1348.740569</b> | <b>674.873922</b> | 1331.714020       | 666.360648       | <b>1330.730004</b> | 665.868640       | 10 |
| 6  | 595.344989         | 298.176133      |                |                  | 577.334424     | 289.170850       | A    | <b>1251.687805</b> | 626.347540        | 1234.661256       | 617.834266       | 1233.677240        | 617.342258       | 9  |
| 7  | 710.371932         | 355.689604      |                |                  | 692.361367     | 346.684322       | D    | <b>1180.650691</b> | 590.828984        | 1163.624142       | 582.315709       | 1162.640126        | 581.823701       | 8  |
| 8  | <b>781.409046</b>  | 391.208161      |                |                  | 763.398481     | 382.202879       | A    | <b>1065.623748</b> | 533.315512        | 1048.597199       | 524.802238       |                    |                  | 7  |
| 9  | <b>894.493110</b>  | 447.750193      |                |                  | 876.482545     | 438.744911       | L    | <b>994.586634</b>  | 497.796955        | 977.560085        | 489.283681       |                    |                  | 6  |
| 10 | <b>951.514574</b>  | 476.260925      |                |                  | 933.504009     | 467.255643       | G    | <b>881.502570</b>  | 441.254923        | 864.476021        | 432.741649       |                    |                  | 5  |
| 11 | 1048.567338        | 524.787307      |                |                  | 1030.556773    | 515.782025       | P    | <b>824.481106</b>  | 412.744191        | 807.454557        | 404.230916       |                    |                  | 4  |
| 12 | 1161.651402        | 581.329339      |                |                  | 1143.640837    | 572.324056       | L    | 727.428342         | 364.217809        | 710.401793        | 355.704534       |                    |                  | 3  |
| 13 | <b>1600.876728</b> | 800.942002      | 1583.850179    | 792.428728       | 1582.866163    | 791.936719       | Q    | <b>614.344278</b>  | 307.675777        | <b>597.317729</b> | 299.162503       |                    |                  | 2  |
| 14 |                    |                 |                |                  |                |                  | R    | <b>175.118952</b>  | 88.063114         | 158.092403        | 79.549839        |                    |                  | 1  |

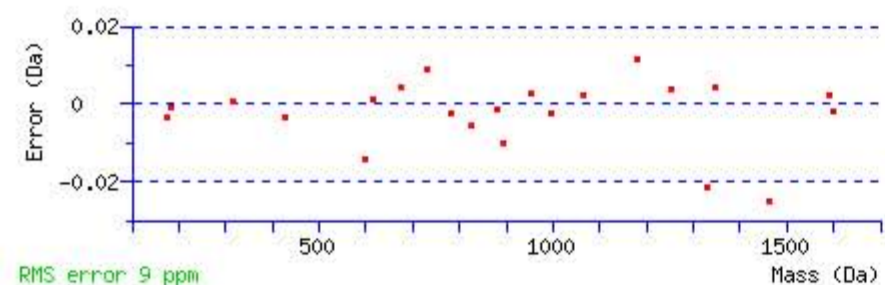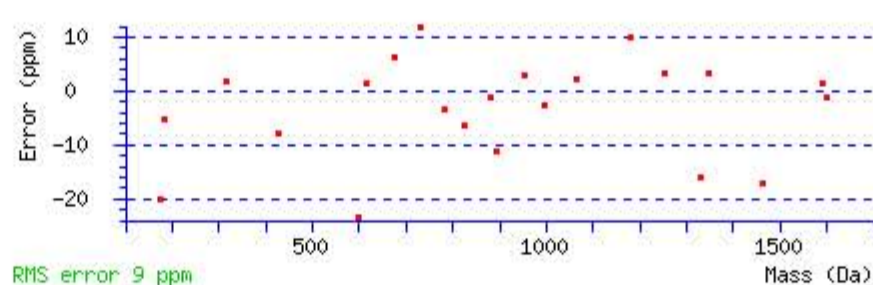

NCBI BLAST search of [LAELPADALGPLQR](#)

(Parameters: blastp, nr protein database, expect=20000, no filter, PAM30)

Other BLAST [web gateways](#)

All matches to this query

| Score | Mr(calc):   | Delta     | Sequence                         |
|-------|-------------|-----------|----------------------------------|
| 70.5  | 1773.981094 | -0.002746 | <a href="#">LAELPADALGPLQR</a>   |
| 2.7   | 1773.963821 | 0.014527  | <a href="#">ALEPPSGVLHFQPRAR</a> |

Mascot: <http://www.matrixscience.com/>

# MASCOT Search Results

## Peptide View

MS/MS Fragmentation of **SFEGLGQLEVLTLTDHNLQLEVK**

Found in **ALS\_HUMAN**, Insulin-like growth factor-binding protein complex acid labile subunit OS=Homo sapiens GN=IGFALS PE=1 SV=1

Match to Query 51637: 2807.452332 from(936.824720,3+) rtinseconds(2721) index(36005)

Title: Locus:1.1.1.3610.18 File:"2013-07-02 CLN FXIII 180 min 3rd F 3.wiff"

Data file C:\Program Files (x86)\Matrix Science\Mascot Daemon\mgf\9 FXIII 180 min 3rd\mascot\_daemon\_merge.mgf

Click mouse within plot area to zoom in by factor of two about that point

Or, Plot from 0 to 3000 Da Full range

Label all possible matches  Label matches used for scoring

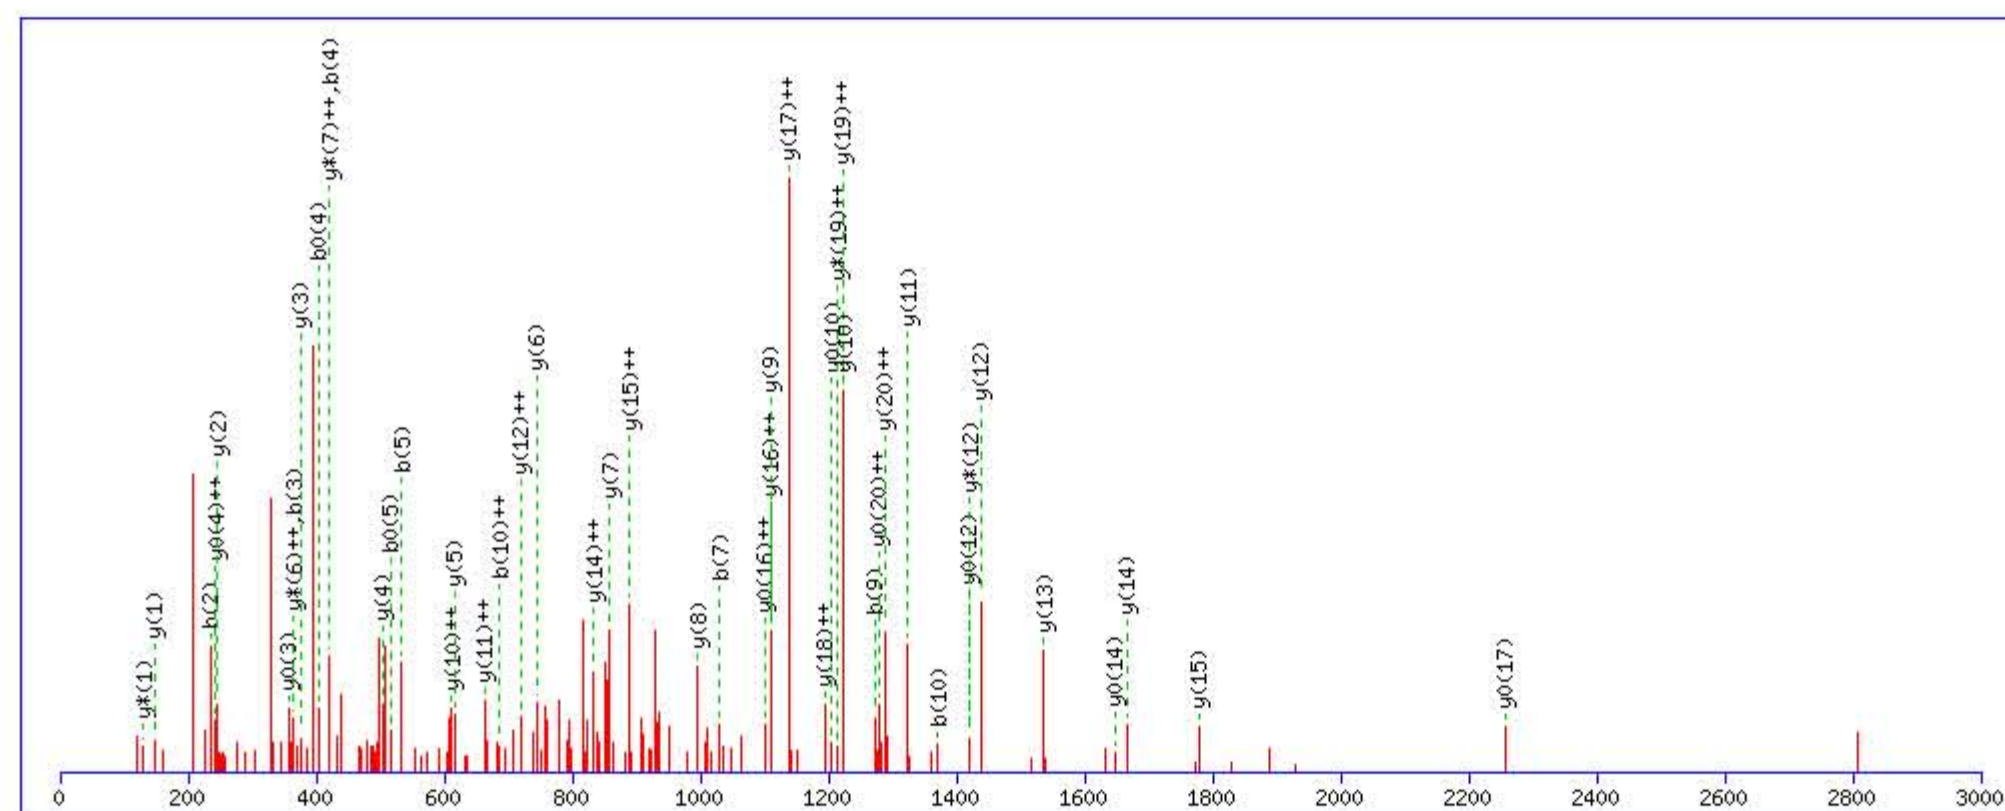

Monoisotopic mass of neutral peptide Mr(calc): 2807.452759

Fixed modifications: Carbamidomethyl (C) (apply to specified residues or termini only)

Variable modifications:

Q7 : Biotin:Thermo-21345 (Q)

Ions Score: 77 Expect: 4.6e-007

Matches : 48/236 fragment ions using 94 most intense peaks [\(help\)](#)

| #  | b                  | b <sup>++</sup>   | b <sup>*</sup> | b <sup>*++</sup> | b <sup>0</sup>    | b <sup>0++</sup> | Seq. | y                  | y <sup>++</sup>    | y <sup>*</sup>     | y <sup>*++</sup>   | y <sup>0</sup>     | y <sup>0++</sup>   | #  |
|----|--------------------|-------------------|----------------|------------------|-------------------|------------------|------|--------------------|--------------------|--------------------|--------------------|--------------------|--------------------|----|
| 1  | 88.039304          | 44.523290         |                |                  | 70.028739         | 35.518008        | S    |                    |                    |                    |                    |                    |                    | 22 |
| 2  | <b>235.107718</b>  | 118.057497        |                |                  | 217.097153        | 109.052214       | F    | 2721.428016        | 1361.217646        | 2704.401467        | 1352.704371        | 2703.417451        | 1352.212363        | 21 |
| 3  | <b>364.150311</b>  | 182.578793        |                |                  | 346.139746        | 173.573511       | E    | 2574.359602        | <b>1287.683439</b> | 2557.333053        | 1279.170164        | 2556.349037        | <b>1278.678156</b> | 20 |
| 4  | <b>421.171775</b>  | 211.089525        |                |                  | <b>403.161210</b> | 202.084243       | G    | 2445.317009        | <b>1223.162142</b> | 2428.290460        | <b>1214.648868</b> | 2427.306444        | 1214.156860        | 19 |
| 5  | <b>534.255839</b>  | 267.631558        |                |                  | <b>516.245274</b> | 258.626275       | L    | 2388.295545        | <b>1194.651410</b> | 2371.268996        | 1186.138136        | 2370.284980        | 1185.646128        | 18 |
| 6  | 591.277303         | 296.142290        |                |                  | 573.266738        | 287.137007       | G    | 2275.211481        | <b>1138.109378</b> | 2258.184932        | 1129.596104        | <b>2257.200916</b> | 1129.104096        | 17 |
| 7  | <b>1030.502629</b> | 515.754953        | 1013.476080    | 507.241678       | 1012.492064       | 506.749670       | Q    | 2218.190017        | <b>1109.598646</b> | 2201.163468        | 1101.085372        | 2200.179452        | <b>1100.593364</b> | 16 |
| 8  | 1143.586693        | 572.296985        | 1126.560144    | 563.783710       | 1125.576128       | 563.291702       | L    | <b>1778.964691</b> | <b>889.985984</b>  | 1761.938142        | 881.472709         | 1760.954126        | 880.980701         | 15 |
| 9  | <b>1272.629286</b> | 636.818281        | 1255.602737    | 628.305007       | 1254.618721       | 627.812999       | E    | <b>1665.880627</b> | <b>833.443952</b>  | 1648.854078        | 824.930677         | <b>1647.870062</b> | 824.438669         | 14 |
| 10 | <b>1371.697700</b> | <b>686.352488</b> | 1354.671151    | 677.839214       | 1353.687135       | 677.347206       | V    | <b>1536.838034</b> | 768.922655         | 1519.811485        | 760.409381         | 1518.827469        | 759.917373         | 13 |
| 11 | 1484.781764        | 742.894520        | 1467.755215    | 734.381246       | 1466.771199       | 733.889238       | L    | <b>1437.769620</b> | <b>719.388448</b>  | <b>1420.743071</b> | 710.875174         | <b>1419.759055</b> | 710.383166         | 12 |
| 12 | 1585.829443        | 793.418360        | 1568.802894    | 784.905085       | 1567.818878       | 784.413077       | T    | <b>1324.685556</b> | <b>662.846416</b>  | 1307.659007        | 654.333142         | 1306.674991        | 653.841134         | 11 |
| 13 | 1698.913507        | 849.960392        | 1681.886958    | 841.447117       | 1680.902942       | 840.955109       | L    | <b>1223.637877</b> | <b>612.322577</b>  | 1206.611328        | 603.809302         | <b>1205.627312</b> | 603.317294         | 10 |
| 14 | 1813.940450        | 907.473863        | 1796.913901    | 898.960589       | 1795.929885       | 898.468581       | D    | <b>1110.553813</b> | 555.780545         | 1093.527264        | 547.267270         | 1092.543248        | 546.775262         | 9  |
| 15 | 1950.999362        | 976.003319        | 1933.972813    | 967.490045       | 1932.988797       | 966.998037       | H    | <b>995.526870</b>  | 498.267073         | 978.500321         | 489.753799         | 977.516305         | 489.261791         | 8  |
| 16 | 2065.042289        | 1033.024782       | 2048.015740    | 1024.511508      | 2047.031724       | 1024.019500      | N    | <b>858.467958</b>  | 429.737617         | 841.441409         | <b>421.224343</b>  | 840.457393         | 420.732335         | 7  |
| 17 | 2193.100867        | 1097.054072       | 2176.074318    | 1088.540797      | 2175.090302       | 1088.048789      | Q    | <b>744.425031</b>  | 372.716154         | 727.398482         | <b>364.202879</b>  | 726.414466         | 363.710871         | 6  |
| 18 | 2306.184931        | 1153.596104       | 2289.158382    | 1145.082829      | 2288.174366       | 1144.590821      | L    | <b>616.366453</b>  | 308.686865         | 599.339904         | 300.173590         | 598.355888         | 299.681582         | 5  |
| 19 | 2434.243509        | 1217.625393       | 2417.216960    | 1209.112118      | 2416.232944       | 1208.620110      | Q    | <b>503.282389</b>  | 252.144833         | 486.255840         | 243.631558         | 485.271824         | <b>243.139550</b>  | 4  |
| 20 | 2563.286102        | 1282.146689       | 2546.259553    | 1273.633415      | 2545.275537       | 1273.141407      | E    | <b>375.223811</b>  | 188.115543         | 358.197262         | 179.602269         | <b>357.213246</b>  | 179.110261         | 3  |
| 21 | 2662.354516        | 1331.680896       | 2645.327967    | 1323.167622      | 2644.343951       | 1322.675614      | V    | <b>246.181218</b>  | 123.594247         | 229.154669         | 115.080972         |                    |                    | 2  |
| 22 |                    |                   |                |                  |                   |                  | K    | <b>147.112804</b>  | 74.060040          | <b>130.086255</b>  | 65.546765          |                    |                    | 1  |

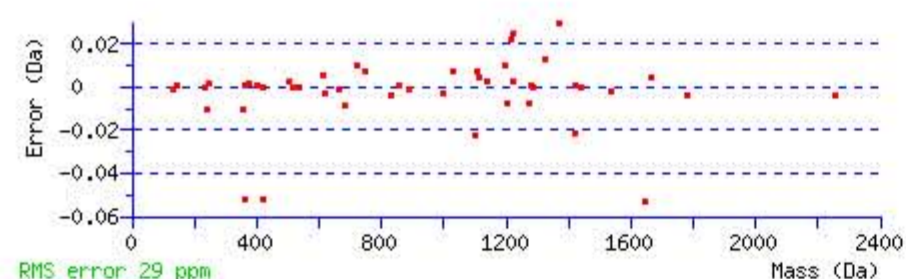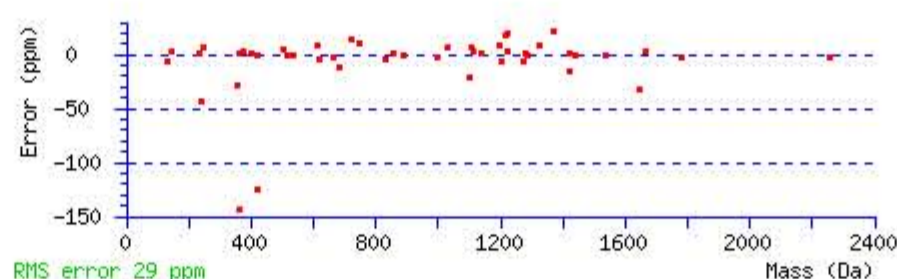

NCBI BLAST search of **SFEGLGQLEVLTLTDHNLQLEVK**

(Parameters: blastp, nr protein database, expect=20000, no filter, PAM30)

Other BLAST [web gateways](#)

All matches to this query

| Score | Mr(calc):   | Delta     | Sequence                                |
|-------|-------------|-----------|-----------------------------------------|
| 77.3  | 2807.452759 | -0.000427 | <a href="#">SFEGLGQLEVLTLTDHNLQLEVK</a> |
| 6.9   | 2807.452759 | -0.000427 | <a href="#">SFEGLGQLEVLTLTDHNLQLEVK</a> |

# MASCOT Search Results

## Peptide View

MS/MS Fragmentation of **ELAAQTIK**

Found in **ITIH1\_HUMAN**, Inter-alpha-trypsin inhibitor heavy chain H1 OS=Homo sapiens GN=ITIH1 PE=1 SV=3

Match to Query 17365: 1183.662388 from(592.838470,2+) rtinseconds(1752) index(44431)

Title: Locus:1.1.1.3323.5 File:"2013-07-02 CLN FXIII 180 min 3rd F 4.wiff"

Data file C:\Program Files (x86)\Matrix Science\Mascot Daemon\mgf9 FXIII 180 min 3rd\mascot\_daemon\_merge.mgf

Click mouse within plot area to zoom in by factor of two about that point

Or, Plot from  to  Da

Label all possible matches  Label matches used for scoring

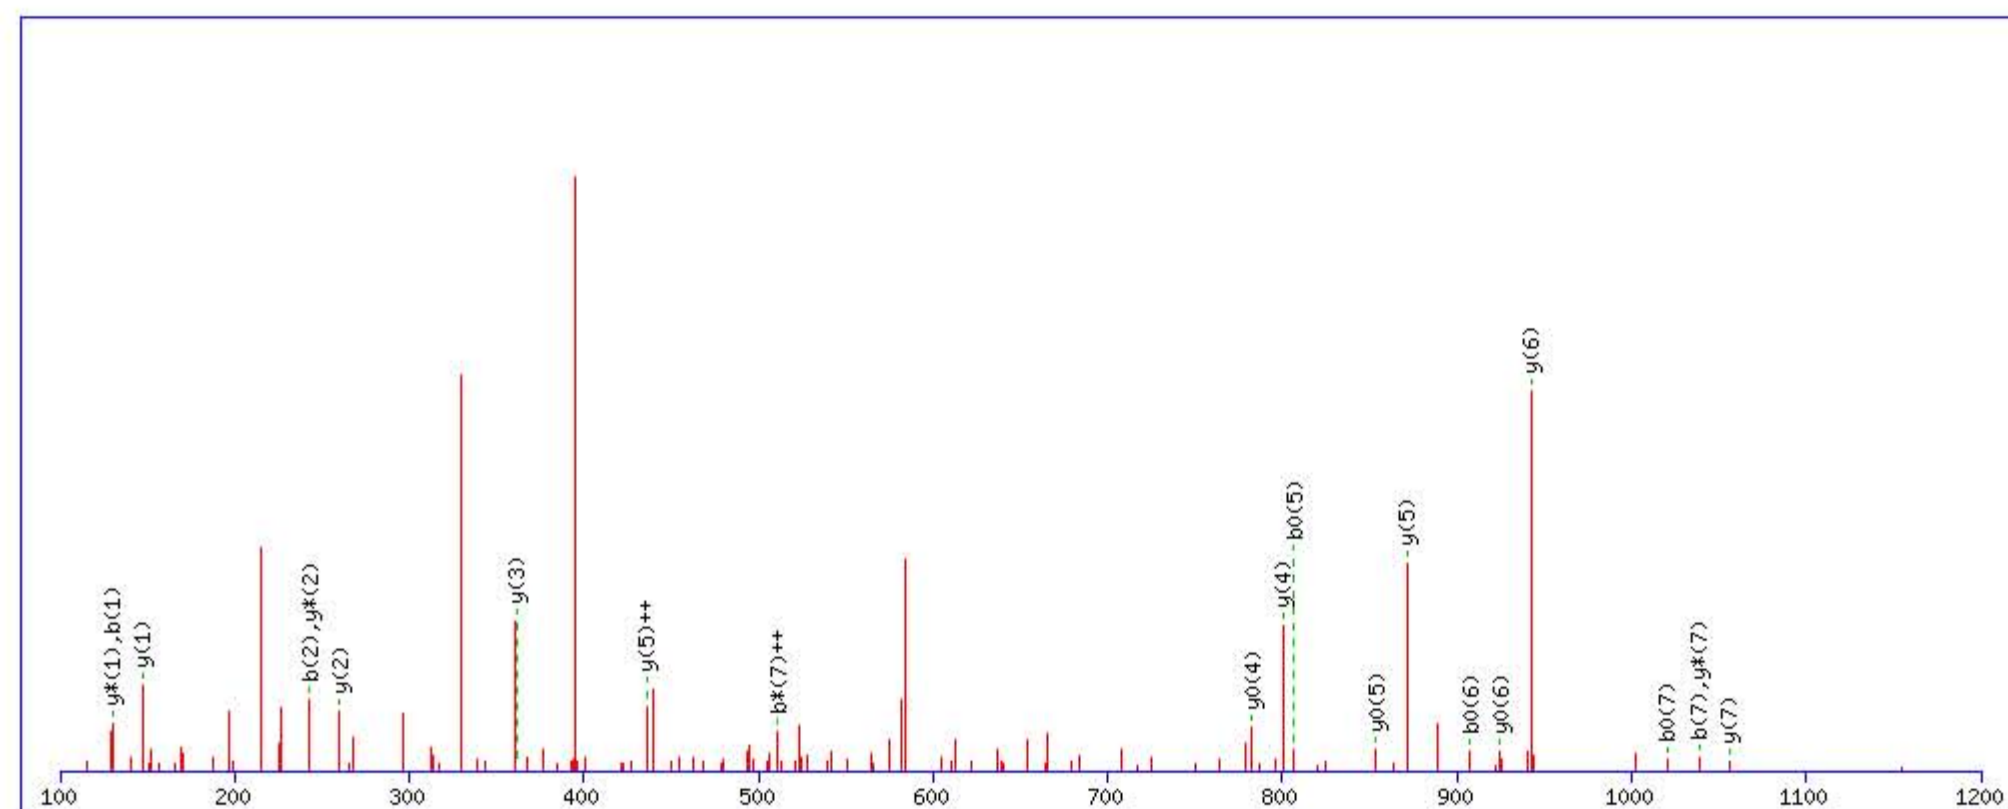

Monoisotopic mass of neutral peptide Mr(calc): 1183.663452

Fixed modifications: Carbamidomethyl (C) (apply to specified residues or termini only)

Variable modifications:

Q5 : Biotin:Thermo-21345 (Q)

Ions Score: 36 Expect: 0.0056

Matches : 21/72 fragment ions using 40 most intense peaks [\(help\)](#)

| # | b           | b <sup>++</sup> | b <sup>*</sup> | b <sup>+++</sup> | b <sup>0</sup> | b <sup>0++</sup> | Seq. | y           | y <sup>++</sup> | y <sup>*</sup> | y <sup>+++</sup> | y <sup>0</sup> | y <sup>0++</sup> | # |
|---|-------------|-----------------|----------------|------------------|----------------|------------------|------|-------------|-----------------|----------------|------------------|----------------|------------------|---|
| 1 | 130.049869  | 65.528572       |                |                  | 112.039304     | 56.523290        | E    |             |                 |                |                  |                |                  | 8 |
| 2 | 243.133933  | 122.070605      |                |                  | 225.123368     | 113.065322       | L    | 1055.628165 | 528.317720      | 1038.601616    | 519.804446       | 1037.617600    | 519.312438       | 7 |
| 3 | 314.171047  | 157.589161      |                |                  | 296.160482     | 148.583879       | A    | 942.544101  | 471.775689      | 925.517552     | 463.262414       | 924.533536     | 462.770406       | 6 |
| 4 | 385.208161  | 193.107718      |                |                  | 367.197596     | 184.102436       | A    | 871.506987  | 436.257132      | 854.480438     | 427.743857       | 853.496422     | 427.251849       | 5 |
| 5 | 824.433487  | 412.720382      | 807.406938     | 404.207107       | 806.422922     | 403.715099       | Q    | 800.469873  | 400.738575      | 783.443324     | 392.225300       | 782.459308     | 391.733292       | 4 |
| 6 | 925.481166  | 463.244221      | 908.454617     | 454.730947       | 907.470601     | 454.238939       | T    | 361.244547  | 181.125911      | 344.217998     | 172.612637       | 343.233982     | 172.120629       | 3 |
| 7 | 1038.565230 | 519.786253      | 1021.538681    | 511.272978       | 1020.554665    | 510.780970       | I    | 260.196868  | 130.602072      | 243.170319     | 122.088797       |                |                  | 2 |
| 8 |             |                 |                |                  |                |                  | K    | 147.112804  | 74.060040       | 130.086255     | 65.546765        |                |                  | 1 |

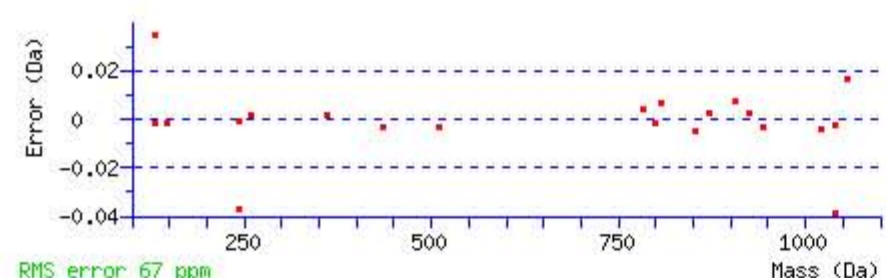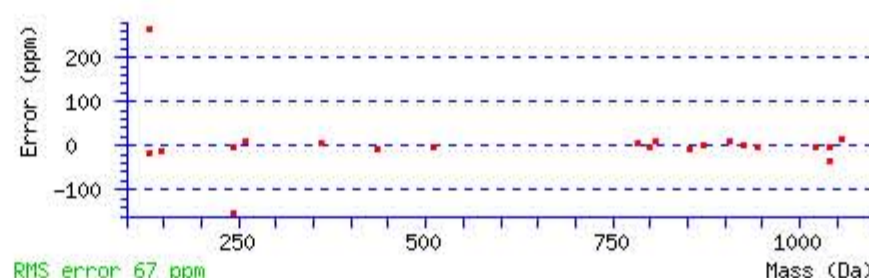

NCBI BLAST search of [ELAAQTIK](#)

(Parameters: blastp, nr protein database, expect=20000, no filter, PAM30)

Other BLAST [web gateways](#)

All matches to this query

| Score | Mr(calc):   | Delta     | Sequence                    |
|-------|-------------|-----------|-----------------------------|
| 36.0  | 1183.663452 | -0.001064 | <a href="#">ELAAQTIK</a>    |
| 29.4  | 1183.663452 | -0.001064 | <a href="#">ELAAQITK</a>    |
| 8.6   | 1183.663452 | -0.001064 | <a href="#">LEQAATLK</a>    |
| 7.8   | 1183.660080 | 0.002308  | <a href="#">AIEVAISPWK</a>  |
| 7.8   | 1183.667282 | -0.004894 | <a href="#">GKQASEPALRK</a> |
| 5.5   | 1183.667297 | -0.004909 | <a href="#">EPTGRVEIRK</a>  |
| 5.1   | 1183.656937 | 0.005451  | <a href="#">MRPQILK</a>     |
| 5.0   | 1183.674683 | -0.012295 | <a href="#">ELRQLSK</a>     |
| 4.8   | 1183.663452 | -0.001064 | <a href="#">EDLQKLK</a>     |
| 4.6   | 1183.674698 | -0.012310 | <a href="#">TQVRELK</a>     |

# MASCOT Search Results

## Peptide View

MS/MS Fragmentation of **LDAQASFLPK**

Found in **ITIH1\_HUMAN**, Inter-alpha-trypsin inhibitor heavy chain H1 OS=Homo sapiens GN=ITIH1 PE=1 SV=3

Match to Query 23605: 1399.755108 from(700.884830,2+) rtinseconds(2240) index(47481)

Title: Locus:1.1.1.3492.15 File:"2013-07-02 CLN FXIII 180 min 3rd F 4.wiff"

Data file C:\Program Files (x86)\Matrix Science\Mascot Daemon\mgf\9 FXIII 180 min 3rd\mascot\_daemon\_merge.mgf

Click mouse within plot area to zoom in by factor of two about that point

Or, Plot from  to  Da

Label all possible matches  Label matches used for scoring

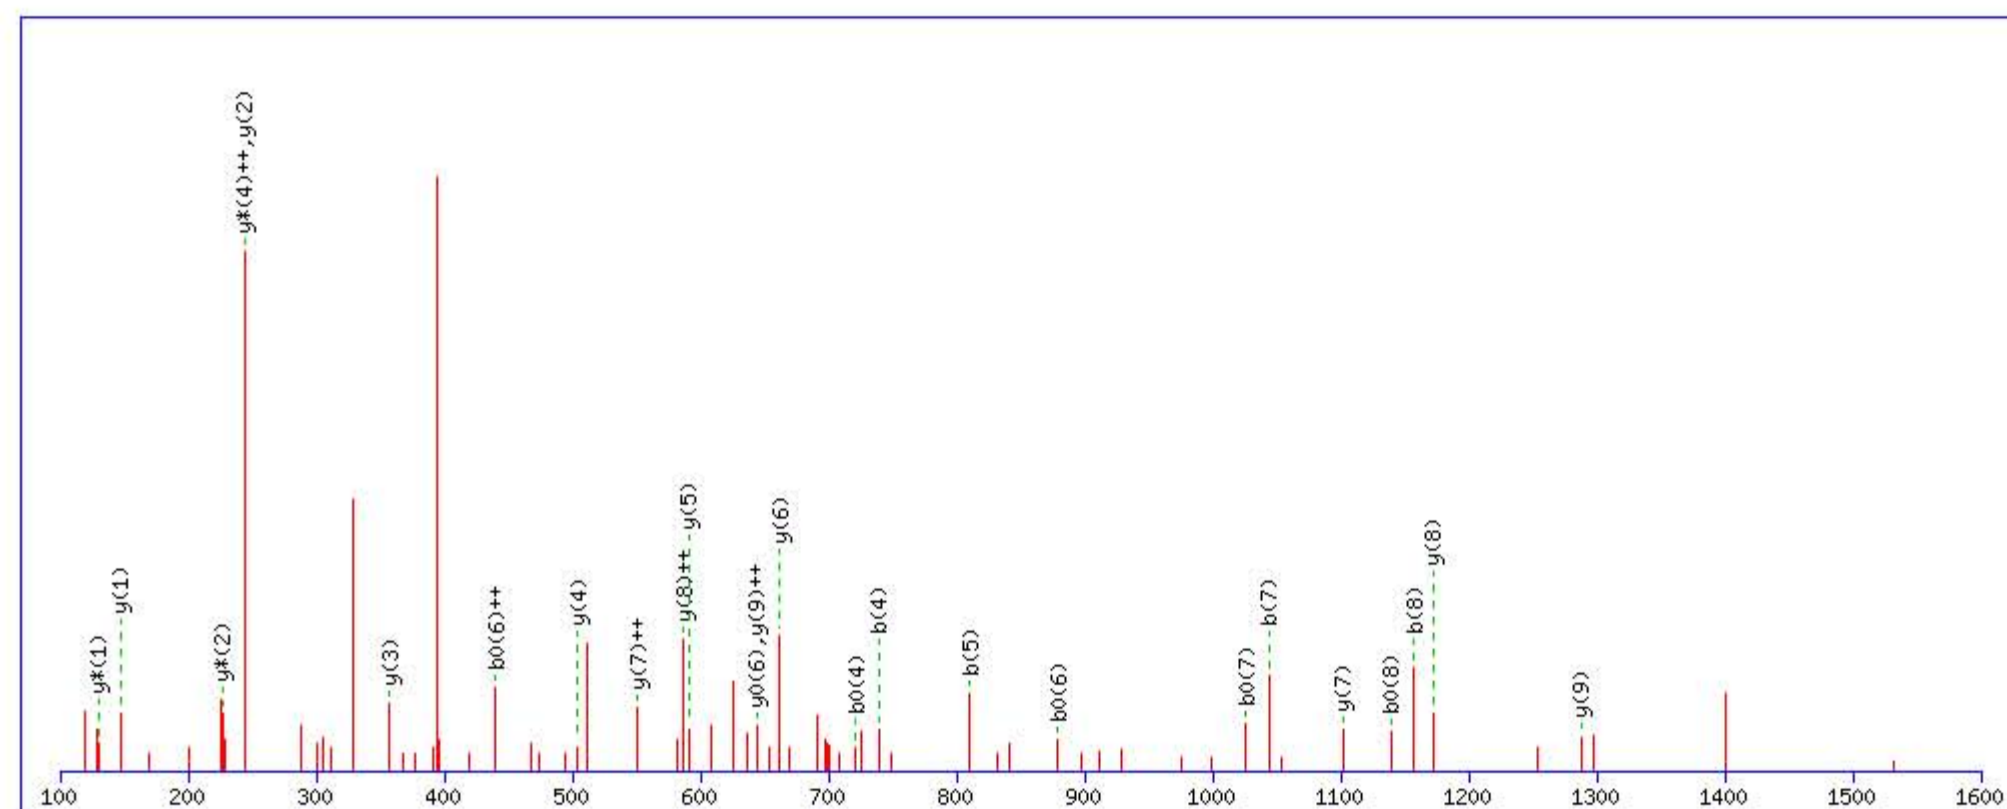

Monoisotopic mass of neutral peptide Mr(calc): 1399.753342

Fixed modifications: Carbamidomethyl (C) (apply to specified residues or termini only)

Variable modifications:

Q4 : Biotin:Thermo-21345 (Q)

Ions Score: 55 Expect: 5.1e-005

Matches : 25/92 fragment ions using 45 most intense peaks [\(help\)](#)

| #  | b           | b <sup>++</sup> | b <sup>*</sup> | b <sup>*++</sup> | b <sup>0</sup> | b <sup>0++</sup> | Seq. | y           | y <sup>++</sup> | y <sup>*</sup> | y <sup>*++</sup> | y <sup>0</sup> | y <sup>0++</sup> | #  |
|----|-------------|-----------------|----------------|------------------|----------------|------------------|------|-------------|-----------------|----------------|------------------|----------------|------------------|----|
| 1  | 114.091340  | 57.549308       |                |                  |                |                  | L    |             |                 |                |                  |                |                  | 10 |
| 2  | 229.118283  | 115.062779      |                |                  | 211.107718     | 106.057497       | D    | 1287.676571 | 644.341924      | 1270.650022    | 635.828649       | 1269.666006    | 635.336641       | 9  |
| 3  | 300.155397  | 150.581336      |                |                  | 282.144832     | 141.576054       | A    | 1172.649628 | 586.828452      | 1155.623079    | 578.315178       | 1154.639063    | 577.823169       | 8  |
| 4  | 739.380723  | 370.194000      | 722.354174     | 361.680725       | 721.370158     | 361.188717       | Q    | 1101.612514 | 551.309895      | 1084.585965    | 542.796621       | 1083.601949    | 542.304612       | 7  |
| 5  | 810.417837  | 405.712557      | 793.391288     | 397.199282       | 792.407272     | 396.707274       | A    | 662.387188  | 331.697232      | 645.360639     | 323.183957       | 644.376623     | 322.691949       | 6  |
| 6  | 897.449865  | 449.228570      | 880.423316     | 440.715296       | 879.439300     | 440.223288       | S    | 591.350074  | 296.178675      | 574.323525     | 287.665400       | 573.339509     | 287.173392       | 5  |
| 7  | 1044.518279 | 522.762777      | 1027.491730    | 514.249503       | 1026.507714    | 513.757495       | F    | 504.318046  | 252.662661      | 487.291497     | 244.149386       |                |                  | 4  |
| 8  | 1157.602343 | 579.304809      | 1140.575794    | 570.791535       | 1139.591778    | 570.299527       | L    | 357.249632  | 179.128454      | 340.223083     | 170.615179       |                |                  | 3  |
| 9  | 1254.655107 | 627.831191      | 1237.628558    | 619.317917       | 1236.644542    | 618.825909       | P    | 244.165568  | 122.586422      | 227.139019     | 114.073148       |                |                  | 2  |
| 10 |             |                 |                |                  |                |                  | K    | 147.112804  | 74.060040       | 130.086255     | 65.546765        |                |                  | 1  |

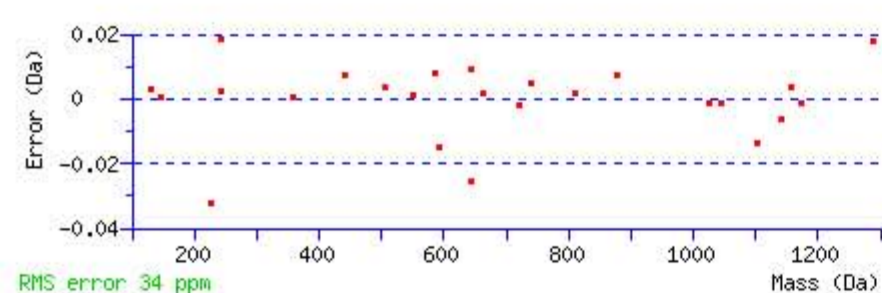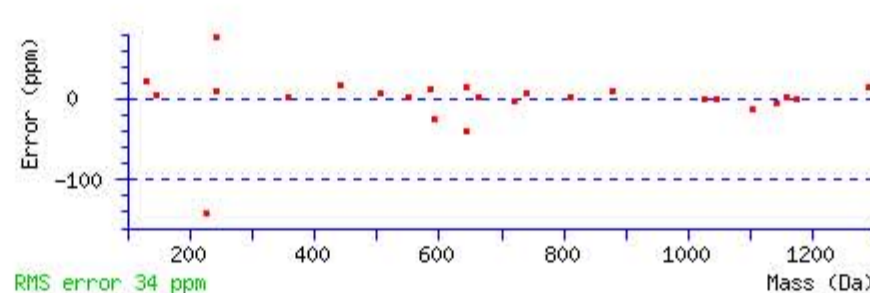

NCBI BLAST search of [LDAQASFLPK](#)

(Parameters: blastp, nr protein database, expect=20000, no filter, PAM30)

Other BLAST [web gateways](#)

All matches to this query

| Score | Mr(calc):   | Delta     | Sequence                      |
|-------|-------------|-----------|-------------------------------|
| 54.6  | 1399.753342 | 0.001766  | <a href="#">LDAQASFLPK</a>    |
| 8.3   | 1399.753342 | 0.001766  | <a href="#">LLDFAASQPK</a>    |
| 7.3   | 1399.745972 | 0.009136  | <a href="#">IDAATGIPVTTWR</a> |
| 3.0   | 1399.746811 | 0.008297  | <a href="#">FKMPKIHMSGPK</a>  |
| 2.6   | 1399.771103 | -0.015995 | <a href="#">QKEPSVLFVDPK</a>  |
| 2.4   | 1399.755814 | -0.000706 | <a href="#">KTELGPLKEEEK</a>  |
| 1.4   | 1399.757156 | -0.002048 | <a href="#">IIGEKYHALNSR</a>  |
| 1.2   | 1399.771973 | -0.016865 | <a href="#">IWQGMLTIK</a>     |

# MASCOT Search Results

## Peptide View

MS/MS Fragmentation of **QAVDTAVDGVFIR**

Found in **ITIH1\_HUMAN**, Inter-alpha-trypsin inhibitor heavy chain H1 OS=Homo sapiens GN=ITIH1 PE=1 SV=3

Match to Query 33655: 1700.888868 from(851.451710,2+) rtinseconds(2327) index(47970)

Title: Locus:1.1.1.3522.16 File:"2013-07-02 CLN FXIII 180 min 3rd F 4.wiff"

Data file C:\Program Files (x86)\Matrix Science\Mascot Daemon\mgf9 FXIII 180 min 3rd\mascot\_daemon\_merge.mgf

Click mouse within plot area to zoom in by factor of two about that point

Or, Plot from  to  Da

Label all possible matches  Label matches used for scoring

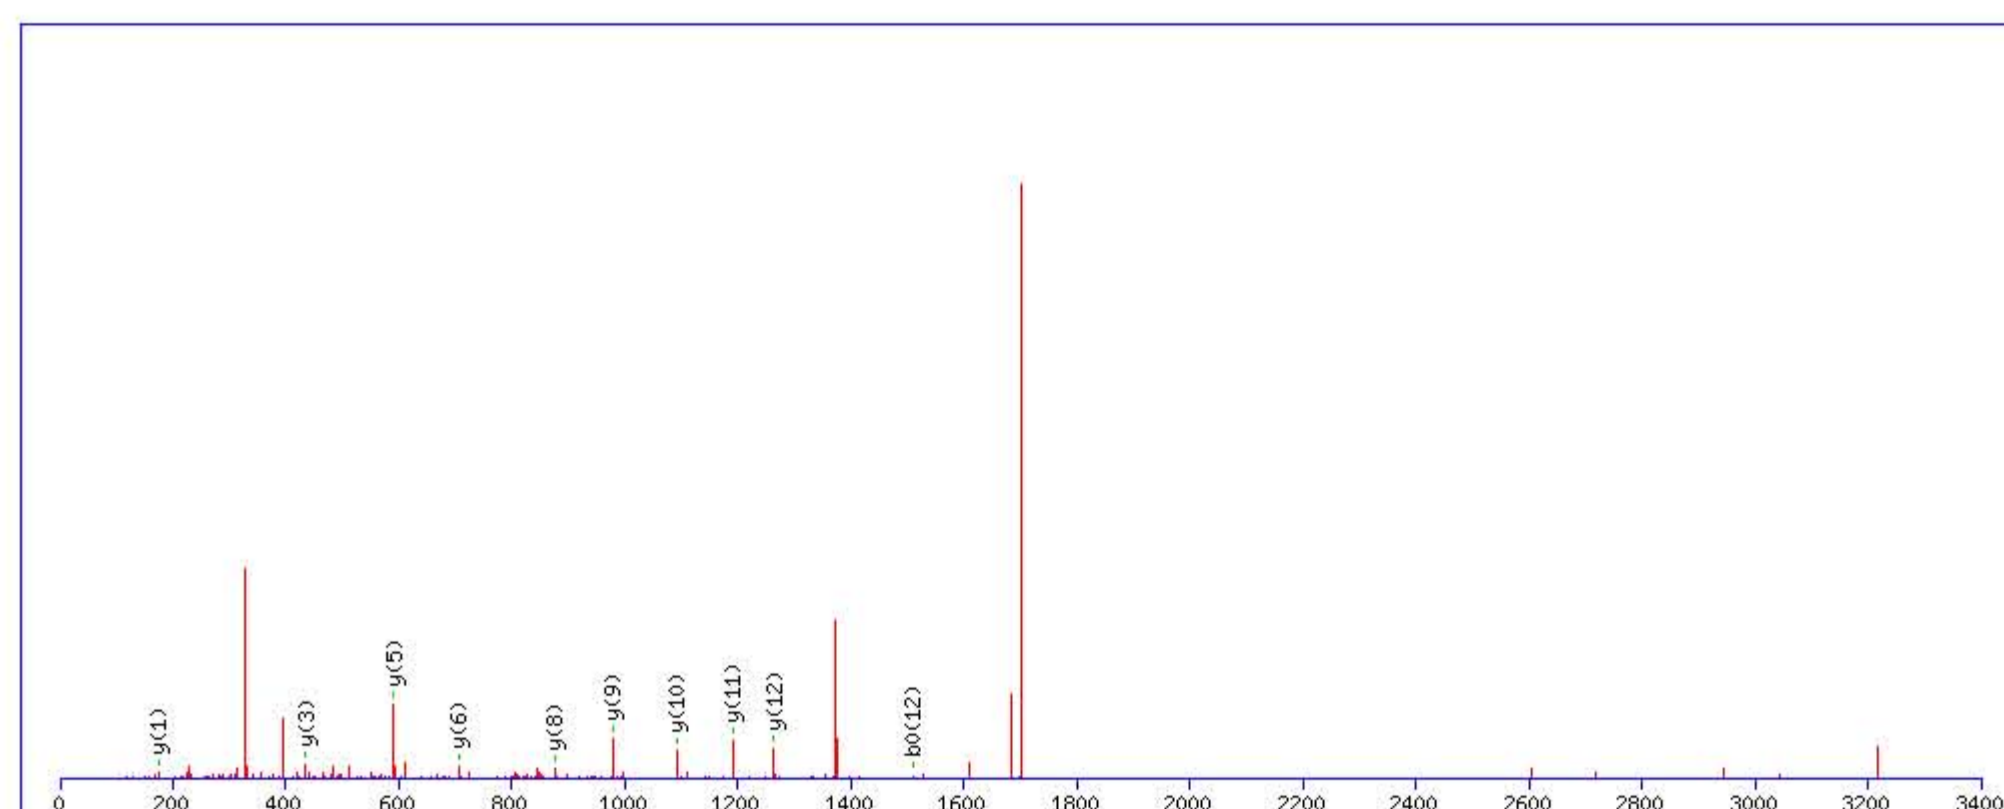

Monoisotopic mass of neutral peptide Mr(calc): 1700.891998

Fixed modifications: Carbamidomethyl (C) (apply to specified residues or termini only)

Variable modifications:

Q1 : Biotin:Thermo-21345 (Q)

Ions Score: 66 Expect: 4.6e-006

Matches : 10/128 fragment ions using 16 most intense peaks [\(help\)](#)

| #  | b           | b <sup>++</sup> | b <sup>*</sup> | b <sup>+++</sup> | b <sup>0</sup>     | b <sup>0++</sup> | Seq. | y                  | y <sup>++</sup> | y <sup>*</sup> | y <sup>+++</sup> | y <sup>0</sup> | y <sup>0++</sup> | #  |
|----|-------------|-----------------|----------------|------------------|--------------------|------------------|------|--------------------|-----------------|----------------|------------------|----------------|------------------|----|
| 1  | 440.232602  | 220.619939      | 423.206053     | 212.106664       |                    |                  | Q    |                    |                 |                |                  |                |                  | 13 |
| 2  | 511.269716  | 256.138496      | 494.243167     | 247.625221       |                    |                  | A    | <b>1262.673929</b> | 631.840602      | 1245.647380    | 623.327328       | 1244.663364    | 622.835320       | 12 |
| 3  | 610.338130  | 305.672703      | 593.311581     | 297.159428       |                    |                  | V    | <b>1191.636815</b> | 596.322045      | 1174.610266    | 587.808771       | 1173.626250    | 587.316763       | 11 |
| 4  | 725.365073  | 363.186174      | 708.338524     | 354.672900       | 707.354508         | 354.180892       | D    | <b>1092.568401</b> | 546.787838      | 1075.541852    | 538.274564       | 1074.557836    | 537.782556       | 10 |
| 5  | 826.412752  | 413.710014      | 809.386203     | 405.196739       | 808.402187         | 404.704731       | T    | <b>977.541458</b>  | 489.274367      | 960.514909     | 480.761092       | 959.530893     | 480.269084       | 9  |
| 6  | 897.449866  | 449.228571      | 880.423317     | 440.715296       | 879.439301         | 440.223288       | A    | <b>876.493779</b>  | 438.750527      | 859.467230     | 430.237253       | 858.483214     | 429.745245       | 8  |
| 7  | 996.518280  | 498.762778      | 979.491731     | 490.249503       | 978.507715         | 489.757495       | V    | 805.456665         | 403.231970      | 788.430116     | 394.718696       | 787.446100     | 394.226688       | 7  |
| 8  | 1111.545223 | 556.276249      | 1094.518674    | 547.762975       | 1093.534658        | 547.270967       | D    | <b>706.388251</b>  | 353.697764      | 689.361702     | 345.184489       | 688.377686     | 344.692481       | 6  |
| 9  | 1168.566687 | 584.786981      | 1151.540138    | 576.273707       | 1150.556122        | 575.781699       | G    | <b>591.361308</b>  | 296.184292      | 574.334759     | 287.671018       |                |                  | 5  |
| 10 | 1267.635101 | 634.321188      | 1250.608552    | 625.807914       | 1249.624536        | 625.315906       | V    | 534.339844         | 267.673560      | 517.313295     | 259.160286       |                |                  | 4  |
| 11 | 1414.703515 | 707.855395      | 1397.676966    | 699.342121       | 1396.692950        | 698.850113       | F    | <b>435.271430</b>  | 218.139353      | 418.244881     | 209.626078       |                |                  | 3  |
| 12 | 1527.787579 | 764.397427      | 1510.761030    | 755.884153       | <b>1509.777014</b> | 755.392145       | I    | 288.203016         | 144.605146      | 271.176467     | 136.091871       |                |                  | 2  |
| 13 |             |                 |                |                  |                    |                  | R    | <b>175.118952</b>  | 88.063114       | 158.092403     | 79.549839        |                |                  | 1  |

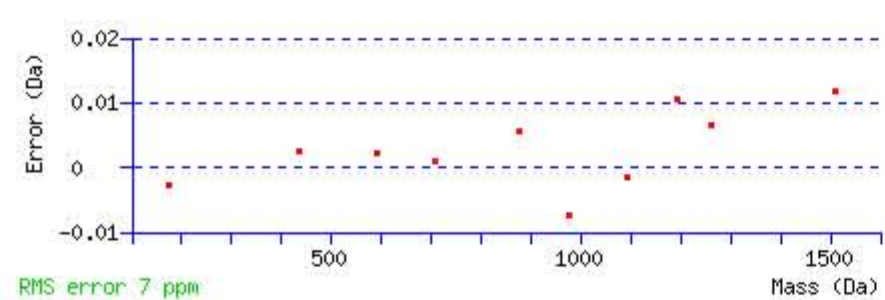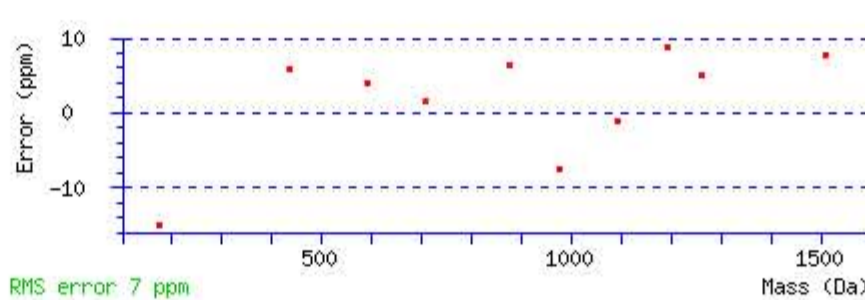

NCBI BLAST search of **QAVDTAVDGVFIR**

(Parameters: blastp, nr protein database, expect=20000, no filter, PAM30)

Other BLAST [web gateways](#)

All matches to this query

| Score | Mr(calc):   | Delta     | Sequence                           |
|-------|-------------|-----------|------------------------------------|
| 65.6  | 1700.891998 | -0.003130 | <a href="#">QAVDTAVDGVFIR</a>      |
| 8.1   | 1700.884109 | 0.004759  | <a href="#">QALITCDDILIK</a>       |
| 3.1   | 1700.881424 | 0.007444  | <a href="#">QAAVMGQKGGSKGR</a>     |
| 0.8   | 1700.881882 | 0.006986  | <a href="#">DNVGP RAPGRAPNQPR</a>  |
| 0.7   | 1700.895813 | -0.006945 | <a href="#">VNPSVNPSISP AHGVAR</a> |
| 0.7   | 1700.863449 | 0.025419  | <a href="#">GSKWEVYPAQVQGP R</a>   |
| 0.5   | 1700.883224 | 0.005644  | <a href="#">QLSLPETGELDSATLK</a>   |
| 0.4   | 1700.880539 | 0.008329  | <a href="#">KSLRINSTATPDQDR</a>    |
| 0.4   | 1700.864120 | 0.024748  | <a href="#">RENVNPRHPCLGPR</a>     |
| 0.4   | 1700.905670 | -0.016802 | <a href="#">SLQEELSLARGTIER</a>    |



# Mascot Search Results

## Peptide View

MS/MS Fragmentation of **GSLVQASEANLQAAQDFVR**

Found in **ITIH1\_HUMAN**, Inter-alpha-trypsin inhibitor heavy chain H1 OS=Homo sapiens GN=ITIH1 PE=1 SV=3

Match to Query 45325: 2314.180032 from(772.400620,3+) rtinseconds(2657) index(49707)

Title: Locus:1.1.1.3637.14 File:"2013-07-02 CLN FXIII 180 min 3rd F 4.wiff"

Data file C:\Program Files (x86)\Matrix Science\Mascot Daemon\mgf9 FXIII 180 min 3rd\mascot\_daemon\_merge.mgf

Click mouse within plot area to zoom in by factor of two about that point

Or, Plot from  to  Da

Label all possible matches  Label matches used for scoring

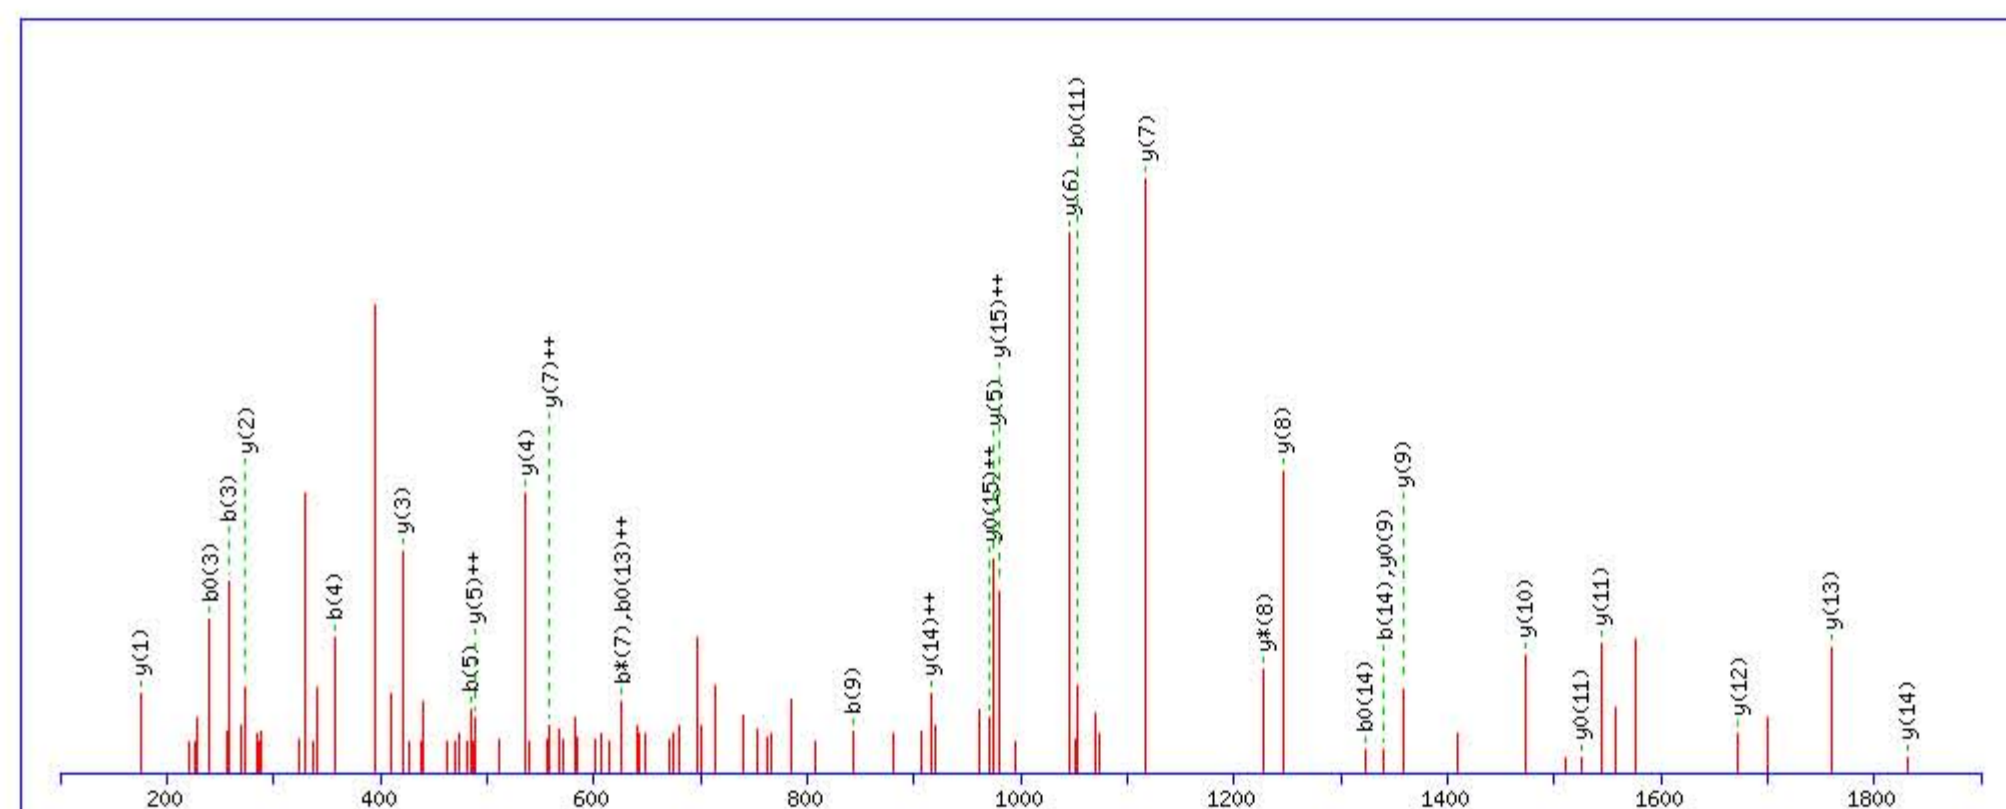

Monoisotopic mass of neutral peptide Mr(calc): 2314.173950

Fixed modifications: Carbamidomethyl (C) (apply to specified residues or termini only)

Variable modifications:

Q15 : Biotin:Thermo-21345 (Q)

Ions Score: 92 Expect: 1.9e-008

Matches : 32/200 fragment ions using 53 most intense peaks [\(help\)](#)

| #  | b                  | b <sup>++</sup> | b <sup>*</sup>    | b <sup>*++</sup> | b <sup>0</sup>     | b <sup>0++</sup> | Seq.     | y                  | y <sup>++</sup>   | y <sup>*</sup>     | y <sup>*++</sup> | y <sup>0</sup>     | y <sup>0++</sup>  | #  |
|----|--------------------|-----------------|-------------------|------------------|--------------------|------------------|----------|--------------------|-------------------|--------------------|------------------|--------------------|-------------------|----|
| 1  | 58.028740          | 29.518008       |                   |                  |                    |                  | <b>G</b> |                    |                   |                    |                  |                    |                   | 19 |
| 2  | 145.060768         | 73.034022       |                   |                  | 127.050203         | 64.028740        | <b>S</b> | 2258.159779        | 1129.583527       | 2241.133230        | 1121.070253      | 2240.149214        | 1120.578245       | 18 |
| 3  | <b>258.144832</b>  | 129.576054      |                   |                  | <b>240.134267</b>  | 120.570772       | <b>L</b> | 2171.127751        | 1086.067513       | 2154.101202        | 1077.554239      | 2153.117186        | 1077.062231       | 17 |
| 4  | <b>357.213246</b>  | 179.110261      |                   |                  | 339.202681         | 170.104979       | <b>V</b> | 2058.043687        | 1029.525481       | 2041.017138        | 1021.012207      | 2040.033122        | 1020.520199       | 16 |
| 5  | <b>485.271824</b>  | 243.139550      | 468.245275        | 234.626276       | 467.261259         | 234.134268       | <b>Q</b> | 1958.975273        | <b>979.991275</b> | 1941.948724        | 971.478000       | 1940.964708        | <b>970.985992</b> | 15 |
| 6  | 556.308938         | 278.658107      | 539.282389        | 270.144833       | 538.298373         | 269.652825       | <b>A</b> | <b>1830.916695</b> | <b>915.961986</b> | 1813.890146        | 907.448711       | 1812.906130        | 906.956703        | 14 |
| 7  | 643.340966         | 322.174121      | <b>626.314417</b> | 313.660847       | 625.330401         | 313.168839       | <b>S</b> | <b>1759.879581</b> | 880.443429        | 1742.853032        | 871.930154       | 1741.869016        | 871.438146        | 13 |
| 8  | 772.383559         | 386.695418      | 755.357010        | 378.182143       | 754.372994         | 377.690135       | <b>E</b> | <b>1672.847553</b> | 836.927415        | 1655.821004        | 828.414140       | 1654.836988        | 827.922132        | 12 |
| 9  | <b>843.420673</b>  | 422.213975      | 826.394124        | 413.700700       | 825.410108         | 413.208692       | <b>A</b> | <b>1543.804960</b> | 772.406118        | 1526.778411        | 763.892844       | <b>1525.794395</b> | 763.400836        | 11 |
| 10 | 957.463600         | 479.235438      | 940.437051        | 470.722164       | 939.453035         | 470.230156       | <b>N</b> | <b>1472.767846</b> | 736.887561        | 1455.741297        | 728.374287       | 1454.757281        | 727.882279        | 10 |
| 11 | 1070.547664        | 535.777470      | 1053.521115       | 527.264196       | <b>1052.537099</b> | 526.772187       | <b>L</b> | <b>1358.724919</b> | 679.866098        | 1341.698370        | 671.352823       | <b>1340.714354</b> | 670.860815        | 9  |
| 12 | 1198.606242        | 599.806759      | 1181.579693       | 591.293485       | 1180.595677        | 590.801477       | <b>Q</b> | <b>1245.640855</b> | 623.324066        | <b>1228.614306</b> | 614.810791       | 1227.630290        | 614.318783        | 8  |
| 13 | 1269.643356        | 635.325316      | 1252.616807       | 626.812042       | 1251.632791        | 626.320034       | <b>A</b> | <b>1117.582277</b> | <b>559.294777</b> | 1100.555728        | 550.781502       | 1099.571712        | 550.289494        | 7  |
| 14 | <b>1340.680470</b> | 670.843873      | 1323.653921       | 662.330599       | <b>1322.669905</b> | 661.838591       | <b>A</b> | <b>1046.545163</b> | 523.776220        | 1029.518614        | 515.262945       | 1028.534598        | 514.770937        | 6  |
| 15 | 1779.905796        | 890.456536      | 1762.879247       | 881.943262       | 1761.895231        | 881.451254       | <b>Q</b> | <b>975.508049</b>  | <b>488.257663</b> | 958.481500         | 479.744388       | 957.497484         | 479.252380        | 5  |
| 16 | 1894.932739        | 947.970008      | 1877.906190       | 939.456733       | 1876.922174        | 938.964725       | <b>D</b> | <b>536.282723</b>  | 268.645000        | 519.256174         | 260.131725       | 518.272158         | 259.639717        | 4  |
| 17 | 2042.001153        | 1021.504215     | 2024.974604       | 1012.990940      | 2023.990588        | 1012.498932      | <b>F</b> | <b>421.255780</b>  | 211.131528        | 404.229231         | 202.618253       |                    |                   | 3  |
| 18 | 2141.069567        | 1071.038421     | 2124.043018       | 1062.525147      | 2123.059002        | 1062.033139      | <b>V</b> | <b>274.187366</b>  | 137.597321        | 257.160817         | 129.084046       |                    |                   | 2  |
| 19 |                    |                 |                   |                  |                    |                  | <b>R</b> | <b>175.118952</b>  | 88.063114         | 158.092403         | 79.549839        |                    |                   | 1  |

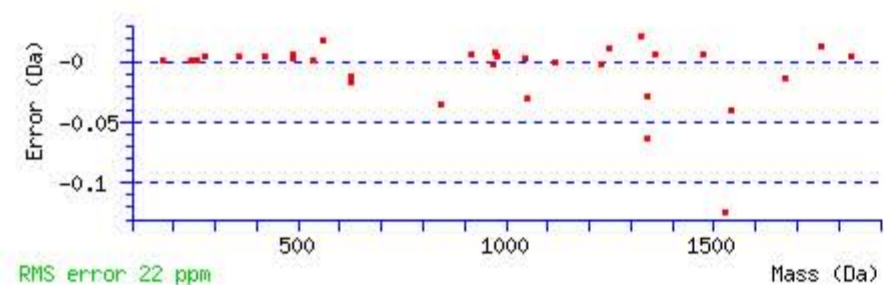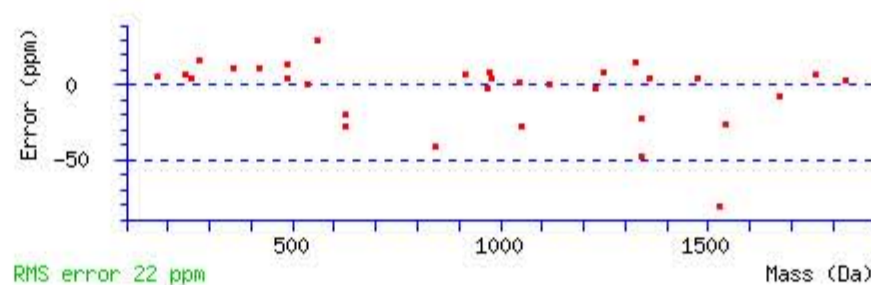

NCBI BLAST search of **GSLVQASEANLQAAQDFVR**

(Parameters: blastp, nr protein database, expect=20000, no filter, PAM30)

Other BLAST [web gateways](#)

All matches to this query

| Score | Mr(calc):   | Delta    | Sequence                            |
|-------|-------------|----------|-------------------------------------|
| 91.7  | 2314.173950 | 0.006082 | <a href="#">GSLVQASEANLQAAQDFVR</a> |
| 52.9  | 2314.173950 | 0.006082 | <a href="#">GSLVQASEANLQAAQDFVR</a> |

# MASCOT Search Results

## Peptide View

MS/MS Fragmentation of **GSLVQASEANLQAAQDFVR**

Found in **ITIH1\_HUMAN**, Inter-alpha-trypsin inhibitor heavy chain H1 OS=Homo sapiens GN=ITIH1 PE=1 SV=3

Match to Query 45326: 2314.181502 from(772.401110,3+) rtinseconds(2510) index(48884)

Title: Locus:1.1.1.3586.15 File:"2013-07-02 CLN FXIII 180 min 3rd F 4.wiff"

Data file C:\Program Files (x86)\Matrix Science\Mascot Daemon\mgf\9 FXIII 180 min 3rd\mascot\_daemon\_merge.mgf

Click mouse within plot area to zoom in by factor of two about that point

Or, Plot from  to  Da

Label all possible matches  Label matches used for scoring

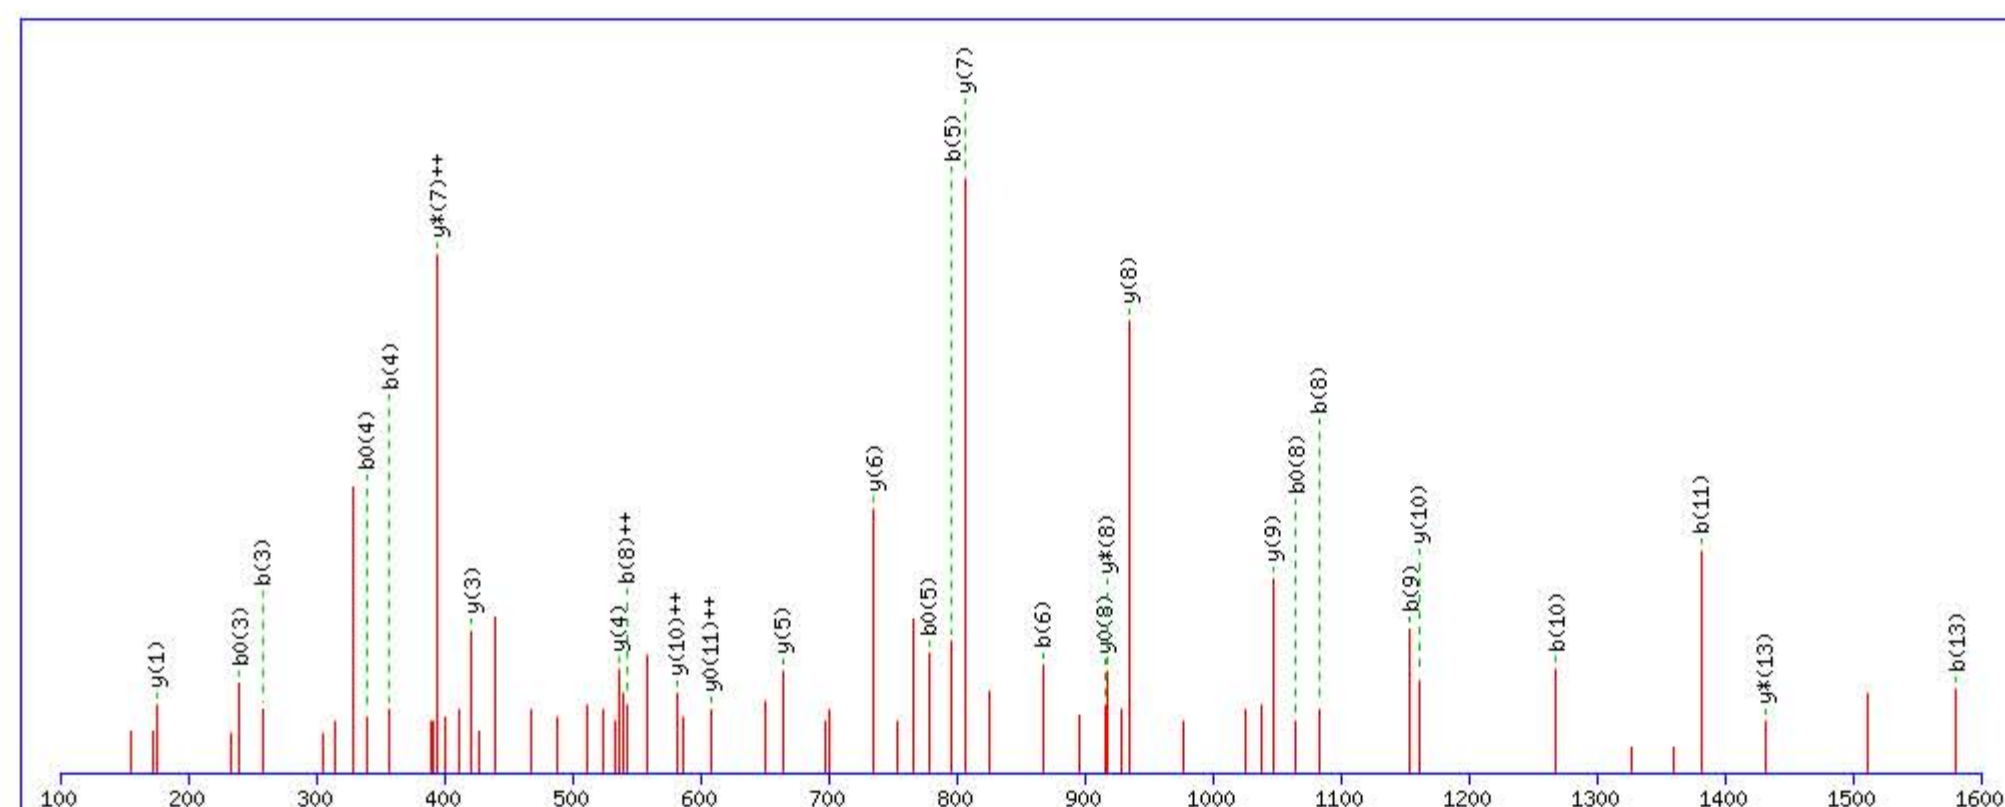

Monoisotopic mass of neutral peptide Mr(calc): 2314.173950

Fixed modifications: Carbamidomethyl (C) (apply to specified residues or termini only)

Variable modifications:

Q5 : Biotin:Thermo-21345 (Q)

Ions Score: 66 Expect: 1.1e-006

Matches : 29/200 fragment ions using 47 most intense peaks [\(help\)](#)

| #  | b                  | b <sup>++</sup>   | b <sup>*</sup> | b <sup>*++</sup> | b <sup>0</sup>     | b <sup>0++</sup> | Seq. | y                  | y <sup>++</sup>   | y <sup>*</sup>     | y <sup>*++</sup>  | y <sup>0</sup>    | y <sup>0++</sup>  | #  |
|----|--------------------|-------------------|----------------|------------------|--------------------|------------------|------|--------------------|-------------------|--------------------|-------------------|-------------------|-------------------|----|
| 1  | 58.028740          | 29.518008         |                |                  |                    |                  | G    |                    |                   |                    |                   |                   |                   | 19 |
| 2  | 145.060768         | 73.034022         |                |                  | 127.050203         | 64.028740        | S    | 2258.159779        | 1129.583527       | 2241.133230        | 1121.070253       | 2240.149214       | 1120.578245       | 18 |
| 3  | <b>258.144832</b>  | 129.576054        |                |                  | <b>240.134267</b>  | 120.570772       | L    | 2171.127751        | 1086.067513       | 2154.101202        | 1077.554239       | 2153.117186       | 1077.062231       | 17 |
| 4  | <b>357.213246</b>  | 179.110261        |                |                  | <b>339.202681</b>  | 170.104979       | V    | 2058.043687        | 1029.525481       | 2041.017138        | 1021.012207       | 2040.033122       | 1020.520199       | 16 |
| 5  | <b>796.438572</b>  | 398.722924        | 779.412023     | 390.209650       | <b>778.428007</b>  | 389.717642       | Q    | 1958.975273        | 979.991274        | 1941.948724        | 971.478000        | 1940.964708       | 970.985992        | 15 |
| 6  | <b>867.475686</b>  | 434.241481        | 850.449137     | 425.728207       | 849.465121         | 425.236199       | A    | 1519.749947        | 760.378611        | 1502.723398        | 751.865337        | 1501.739382       | 751.373329        | 14 |
| 7  | 954.507714         | 477.757495        | 937.481165     | 469.244220       | 936.497149         | 468.752212       | S    | 1448.712833        | 724.860054        | <b>1431.686284</b> | 716.346780        | 1430.702268       | 715.854772        | 13 |
| 8  | <b>1083.550307</b> | <b>542.278792</b> | 1066.523758    | 533.765517       | <b>1065.539742</b> | 533.273509       | E    | 1361.680805        | 681.344040        | 1344.654256        | 672.830766        | 1343.670240       | 672.338758        | 12 |
| 9  | <b>1154.587421</b> | 577.797349        | 1137.560872    | 569.284074       | 1136.576856        | 568.792066       | A    | 1232.638212        | 616.822744        | 1215.611663        | 608.309469        | 1214.627647       | <b>607.817461</b> | 11 |
| 10 | <b>1268.630348</b> | 634.818812        | 1251.603799    | 626.305538       | 1250.619783        | 625.813529       | N    | <b>1161.601098</b> | <b>581.304187</b> | 1144.574549        | 572.790912        | 1143.590533       | 572.298904        | 10 |
| 11 | <b>1381.714412</b> | 691.360844        | 1364.687863    | 682.847569       | 1363.703847        | 682.355561       | L    | <b>1047.558171</b> | 524.282723        | 1030.531622        | 515.769449        | 1029.547606       | 515.277441        | 9  |
| 12 | 1509.772990        | 755.390133        | 1492.746441    | 746.876858       | 1491.762425        | 746.384850       | Q    | <b>934.474107</b>  | 467.740692        | <b>917.447558</b>  | 459.227417        | <b>916.463542</b> | 458.735409        | 8  |
| 13 | <b>1580.810104</b> | 790.908690        | 1563.783555    | 782.395415       | 1562.799539        | 781.903407       | A    | <b>806.415529</b>  | 403.711403        | 789.388980         | <b>395.198128</b> | 788.404964        | 394.706120        | 7  |
| 14 | 1651.847218        | 826.427247        | 1634.820669    | 817.913972       | 1633.836653        | 817.421964       | A    | <b>735.378415</b>  | 368.192846        | 718.351866         | 359.679571        | 717.367850        | 359.187563        | 6  |
| 15 | 1779.905796        | 890.456536        | 1762.879247    | 881.943261       | 1761.895231        | 881.451253       | Q    | <b>664.341301</b>  | 332.674289        | 647.314752         | 324.161014        | 646.330736        | 323.669006        | 5  |
| 16 | 1894.932739        | 947.970007        | 1877.906190    | 939.456733       | 1876.922174        | 938.964725       | D    | <b>536.282723</b>  | 268.645000        | 519.256174         | 260.131725        | 518.272158        | 259.639717        | 4  |
| 17 | 2042.001153        | 1021.504215       | 2024.974604    | 1012.990940      | 2023.990588        | 1012.498932      | F    | <b>421.255780</b>  | 211.131528        | 404.229231         | 202.618253        |                   |                   | 3  |
| 18 | 2141.069567        | 1071.038421       | 2124.043018    | 1062.525147      | 2123.059002        | 1062.033139      | V    | 274.187366         | 137.597321        | 257.160817         | 129.084046        |                   |                   | 2  |
| 19 |                    |                   |                |                  |                    |                  | R    | <b>175.118952</b>  | 88.063114         | 158.092403         | 79.549839         |                   |                   | 1  |

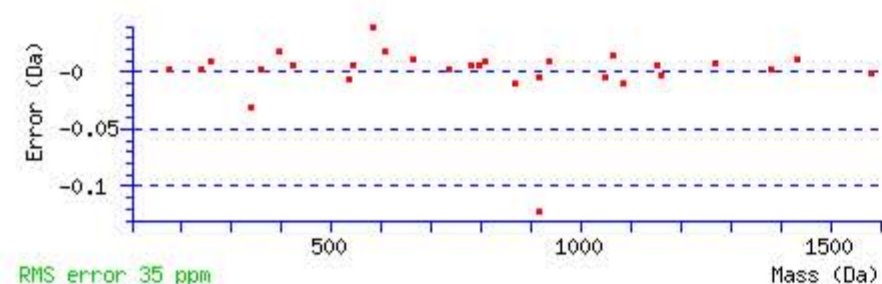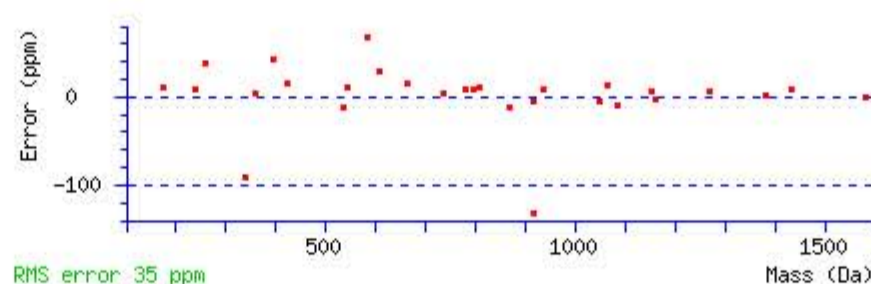

NCBI BLAST search of [GSLVQASEANLQAAQDFVR](#)

(Parameters: blastp, nr protein database, expect=20000, no filter, PAM30)

Other BLAST [web gateways](#)

All matches to this query

| Score | Mr(calc):   | Delta    | Sequence                              |
|-------|-------------|----------|---------------------------------------|
| 65.7  | 2314.173950 | 0.007552 | <a href="#">GSLVQASEANLQAAQDFVR</a>   |
| 13.1  | 2314.173950 | 0.007552 | <a href="#">GSLVQASEANLQAAQDFVR</a>   |
| 2.3   | 2314.156662 | 0.024840 | <a href="#">GPALTPIRDEEWGGHSPRSPR</a> |

# MASCOT SEARCH RESULTS

## Peptide View

MS/MS Fragmentation of **GSLVQASEANLQAAQDFVR**

Found in **ITIH1\_HUMAN**, Inter-alpha-trypsin inhibitor heavy chain H1 OS=Homo sapiens GN=ITIH1 PE=1 SV=3

Match to Query 45327: 2314.188102 from(772.403310,3+) rtinseconds(2561) index(49081)

Title: Locus:1.1.1.3604.6 File:"2013-07-02 CLN FXIII 180 min 3rd F 4.wiff"

Data file C:\Program Files (x86)\Matrix Science\Mascot Daemon\mgf9 FXIII 180 min 3rd\mascot\_daemon\_merge.mgf

Click mouse within plot area to zoom in by factor of two about that point

Or, Plot from  to  Da

Label all possible matches  Label matches used for scoring

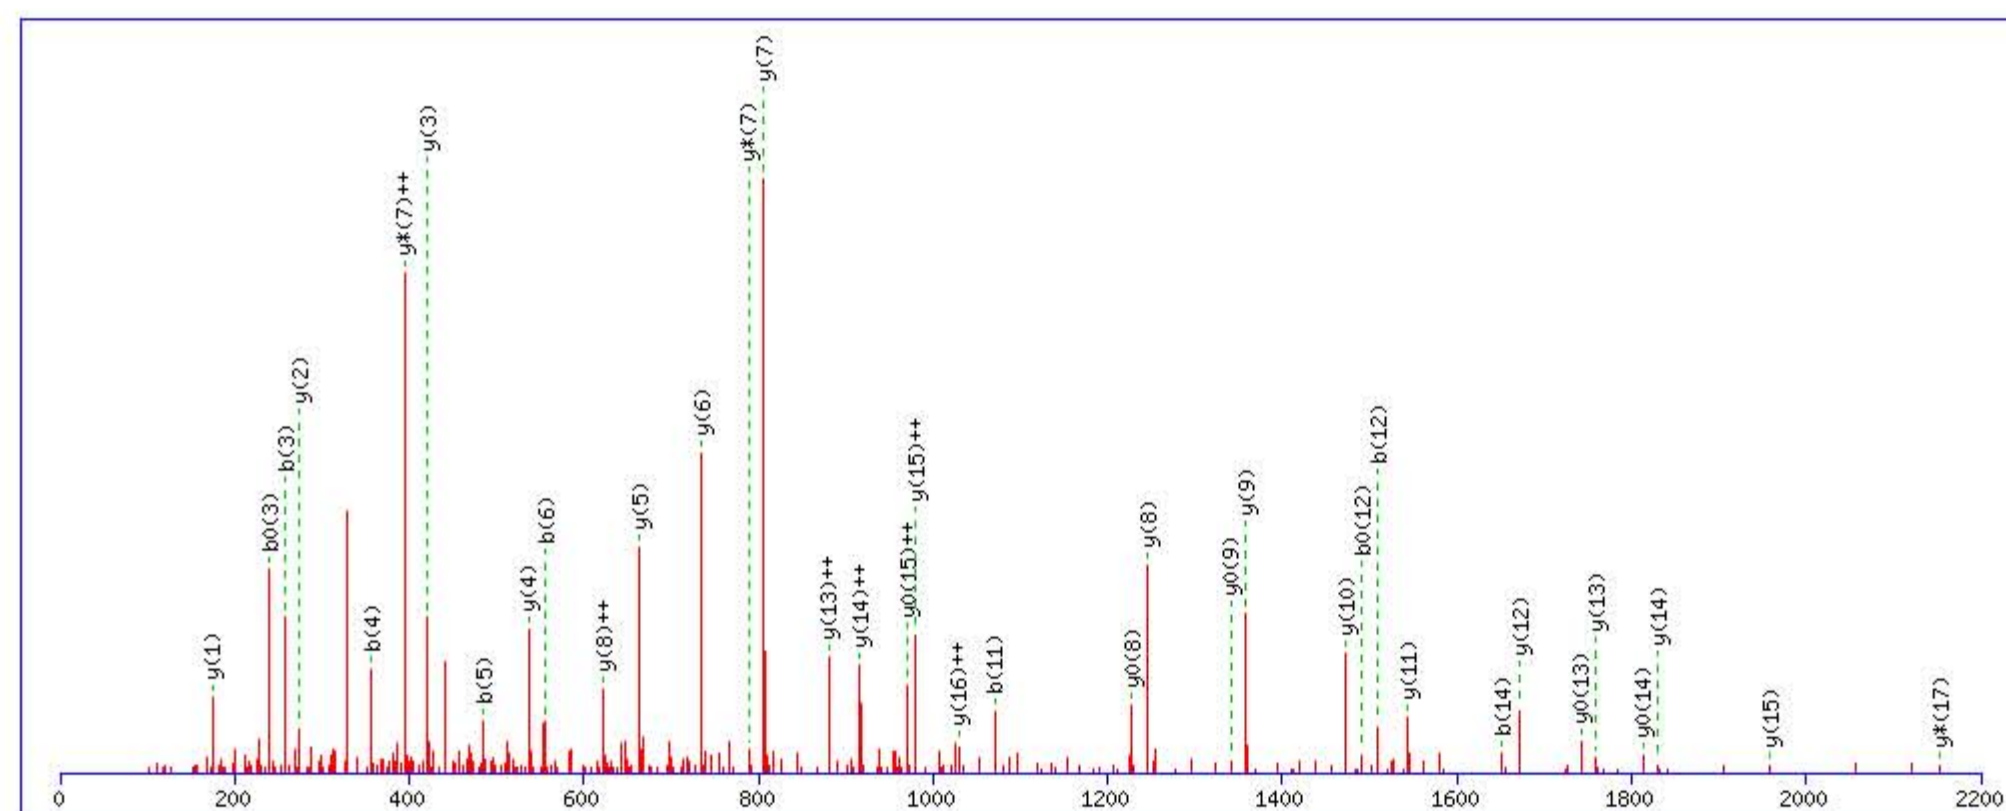

Monoisotopic mass of neutral peptide Mr(calc): 2314.173950

Fixed modifications: Carbamidomethyl (C) (apply to specified residues or termini only)

Variable modifications:

Q12 : Biotin:Thermo-21345 (Q)

Ions Score: 108 Expect: 5e-010

Matches : 37/200 fragment ions using 59 most intense peaks [\(help\)](#)

| #  | b                  | b <sup>++</sup> | b*          | b <sup>+++</sup> | b <sup>0</sup>     | b <sup>0++</sup> | Seq.     | y                  | y <sup>++</sup>    | y*                 | y <sup>+++</sup>  | y <sup>0</sup>     | y <sup>0++</sup>  | #  |
|----|--------------------|-----------------|-------------|------------------|--------------------|------------------|----------|--------------------|--------------------|--------------------|-------------------|--------------------|-------------------|----|
| 1  | 58.028740          | 29.518008       |             |                  |                    |                  | <b>G</b> |                    |                    |                    |                   |                    |                   | 19 |
| 2  | 145.060768         | 73.034022       |             |                  | 127.050203         | 64.028740        | <b>S</b> | 2258.159779        | 1129.583527        | 2241.133230        | 1121.070253       | 2240.149214        | 1120.578245       | 18 |
| 3  | <b>258.144832</b>  | 129.576054      |             |                  | <b>240.134267</b>  | 120.570772       | <b>L</b> | 2171.127751        | 1086.067513        | <b>2154.101202</b> | 1077.554239       | 2153.117186        | 1077.062231       | 17 |
| 4  | <b>357.213246</b>  | 179.110261      |             |                  | 339.202681         | 170.104979       | <b>V</b> | 2058.043687        | <b>1029.525481</b> | 2041.017138        | 1021.012207       | 2040.033122        | 1020.520199       | 16 |
| 5  | <b>485.271824</b>  | 243.139550      | 468.245275  | 234.626276       | 467.261259         | 234.134268       | <b>Q</b> | <b>1958.975273</b> | <b>979.991275</b>  | 1941.948724        | 971.478000        | 1940.964708        | <b>970.985992</b> | 15 |
| 6  | <b>556.308938</b>  | 278.658107      | 539.282389  | 270.144833       | 538.298373         | 269.652825       | <b>A</b> | <b>1830.916695</b> | <b>915.961986</b>  | 1813.890146        | 907.448711        | <b>1812.906130</b> | 906.956703        | 14 |
| 7  | 643.340966         | 322.174121      | 626.314417  | 313.660847       | 625.330401         | 313.168839       | <b>S</b> | <b>1759.879581</b> | <b>880.443429</b>  | 1742.853032        | 871.930154        | <b>1741.869016</b> | 871.438146        | 13 |
| 8  | 772.383559         | 386.695418      | 755.357010  | 378.182143       | 754.372994         | 377.690135       | <b>E</b> | <b>1672.847553</b> | 836.927415         | 1655.821004        | 828.414140        | 1654.836988        | 827.922132        | 12 |
| 9  | 843.420673         | 422.213975      | 826.394124  | 413.700700       | 825.410108         | 413.208692       | <b>A</b> | <b>1543.804960</b> | 772.406118         | 1526.778411        | 763.892844        | 1525.794395        | 763.400836        | 11 |
| 10 | 957.463600         | 479.235438      | 940.437051  | 470.722164       | 939.453035         | 470.230156       | <b>N</b> | <b>1472.767846</b> | 736.887561         | 1455.741297        | 728.374287        | 1454.757281        | 727.882279        | 10 |
| 11 | <b>1070.547664</b> | 535.777470      | 1053.521115 | 527.264196       | 1052.537099        | 526.772187       | <b>L</b> | <b>1358.724919</b> | 679.866098         | 1341.698370        | 671.352823        | <b>1340.714354</b> | 670.860815        | 9  |
| 12 | <b>1509.772990</b> | 755.390133      | 1492.746441 | 746.876859       | <b>1491.762425</b> | 746.384851       | <b>Q</b> | <b>1245.640855</b> | <b>623.324066</b>  | 1228.614306        | 614.810791        | <b>1227.630290</b> | 614.318783        | 8  |
| 13 | 1580.810104        | 790.908690      | 1563.783555 | 782.395416       | 1562.799539        | 781.903408       | <b>A</b> | <b>806.415529</b>  | 403.711403         | <b>789.388980</b>  | <b>395.198128</b> | 788.404964         | 394.706120        | 7  |
| 14 | <b>1651.847218</b> | 826.427247      | 1634.820669 | 817.913973       | 1633.836653        | 817.421965       | <b>A</b> | <b>735.378415</b>  | 368.192846         | 718.351866         | 359.679571        | 717.367850         | 359.187563        | 6  |
| 15 | 1779.905796        | 890.456536      | 1762.879247 | 881.943262       | 1761.895231        | 881.451254       | <b>Q</b> | <b>664.341301</b>  | 332.674289         | 647.314752         | 324.161014        | 646.330736         | 323.669006        | 5  |
| 16 | 1894.932739        | 947.970008      | 1877.906190 | 939.456733       | 1876.922174        | 938.964725       | <b>D</b> | <b>536.282723</b>  | 268.645000         | 519.256174         | 260.131725        | 518.272158         | 259.639717        | 4  |
| 17 | 2042.001153        | 1021.504215     | 2024.974604 | 1012.990940      | 2023.990588        | 1012.498932      | <b>F</b> | <b>421.255780</b>  | 211.131528         | 404.229231         | 202.618253        |                    |                   | 3  |
| 18 | 2141.069567        | 1071.038421     | 2124.043018 | 1062.525147      | 2123.059002        | 1062.033139      | <b>V</b> | <b>274.187366</b>  | 137.597321         | 257.160817         | 129.084046        |                    |                   | 2  |
| 19 |                    |                 |             |                  |                    |                  | <b>R</b> | <b>175.118952</b>  | 88.063114          | 158.092403         | 79.549839         |                    |                   | 1  |

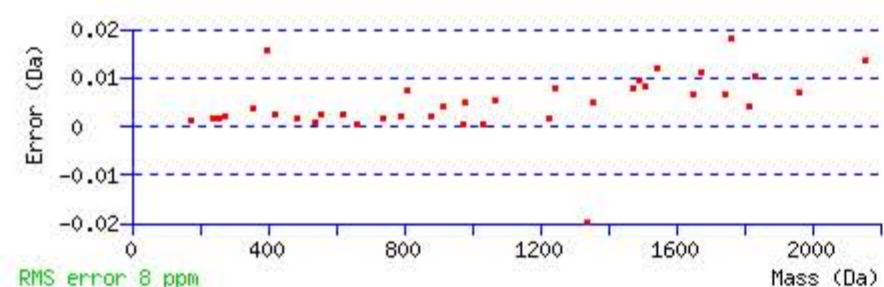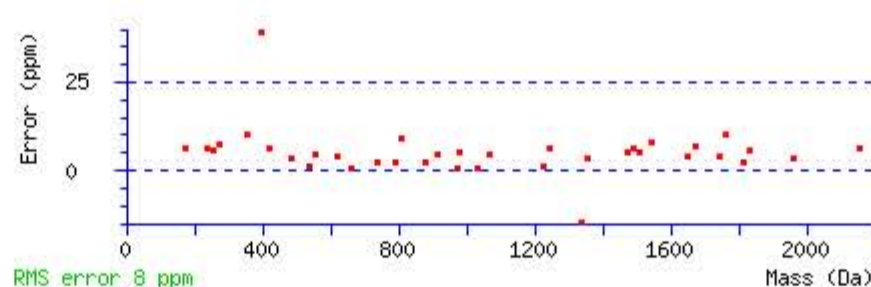

NCBI BLAST search of **GSLVQASEANLQAAQDFVR**

(Parameters: blastp, nr protein database, expect=20000, no filter, PAM30)

Other BLAST [web gateways](#)

All matches to this query

| Score | Mr(calc):   | Delta    | Sequence                            |
|-------|-------------|----------|-------------------------------------|
| 107.5 | 2314.173950 | 0.014152 | <a href="#">GSLVQASEANLQAAQDFVR</a> |
| 60.7  | 2314.173950 | 0.014152 | <a href="#">GSLVQASEANLQAAQDFVR</a> |
| 27.6  | 2314.173950 | 0.014152 | <a href="#">GSLVQASEANLQAAQDFVR</a> |

Mascot: <http://www.matrixscience.com/>

# MASCOT Search Results

## Peptide View

MS/MS Fragmentation of **FAHYVVTSQVVNTANEAR**

Found in **ITIH1\_HUMAN**, Inter-alpha-trypsin inhibitor heavy chain H1 OS=Homo sapiens GN=ITIH1 PE=1 SV=3

Match to Query 45358: 2316.167982 from(773.063270,3+) rtinseconds(1970) index(45811)

Title: Locus:1.1.1.3398.22 File:"2013-07-02 CLN FXIII 180 min 3rd F 4.wiff"

Data file C:\Program Files (x86)\Matrix Science\Mascot Daemon\mgf\9 FXIII 180 min 3rd\mascot\_daemon\_merge.mgf

Click mouse within plot area to zoom in by factor of two about that point

Or, Plot from  to  Da

Label all possible matches  Label matches used for scoring

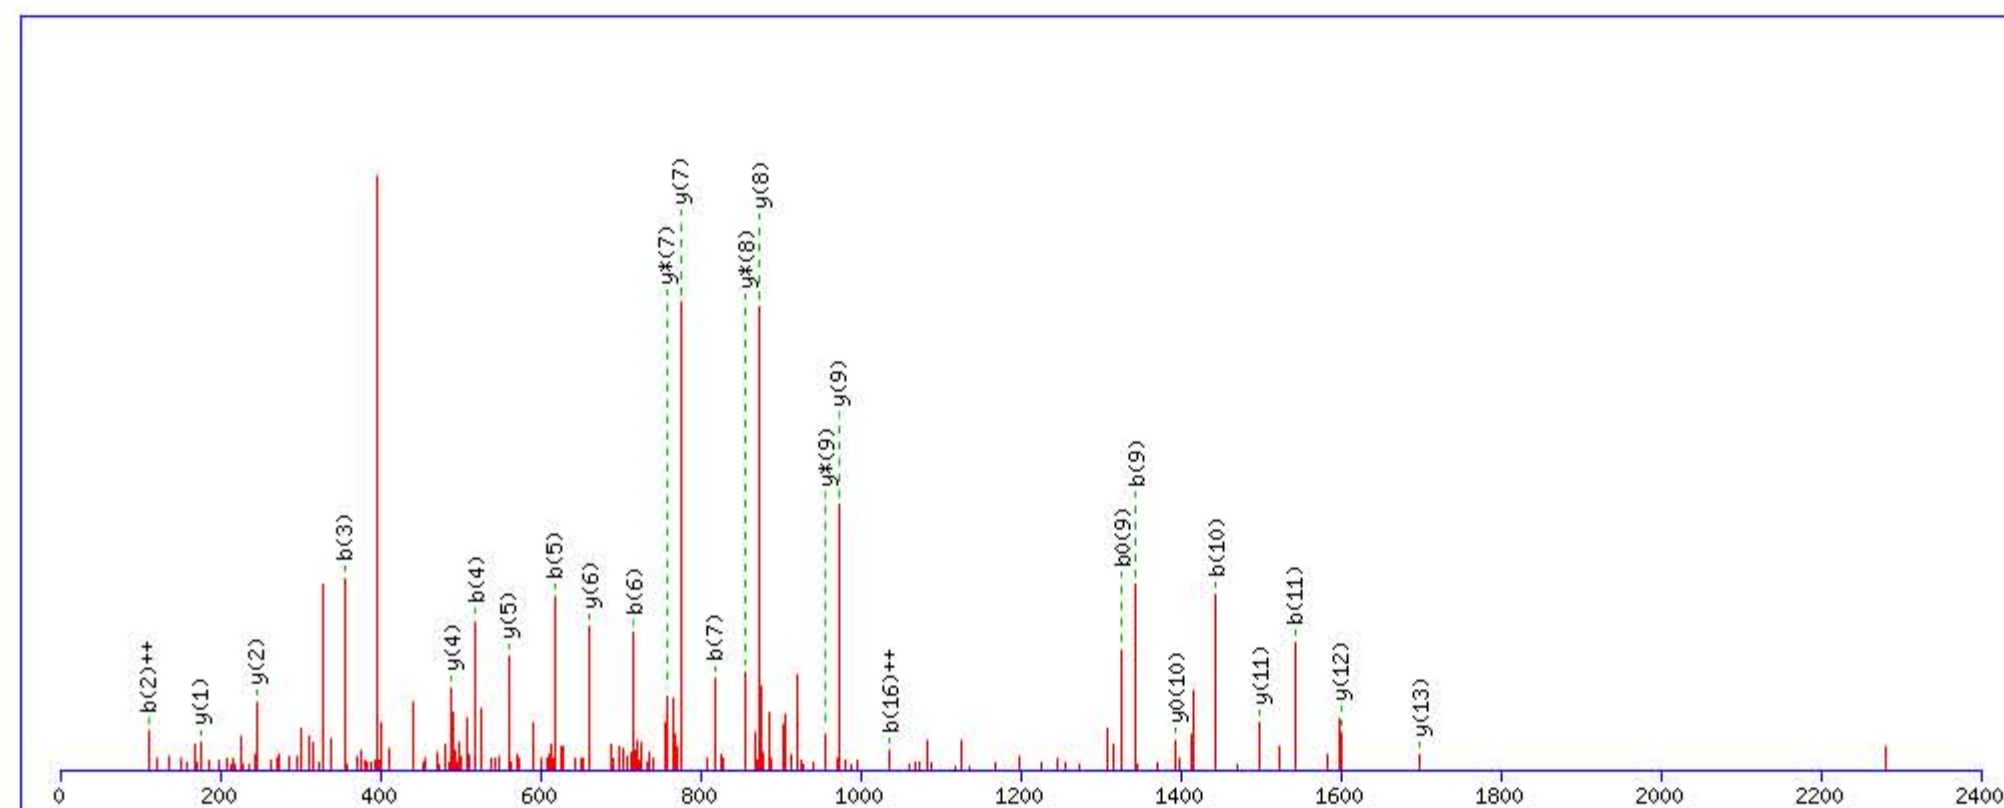

Monoisotopic mass of neutral peptide Mr(calc): 2316.168488

Fixed modifications: Carbamidomethyl (C) (apply to specified residues or termini only)

Variable modifications:

Q9 : Biotin:Thermo-21345 (Q)

Ions Score: 64 Expect: 1.1e-005

Matches : 26/172 fragment ions using 47 most intense peaks [\(help\)](#)

| #  | b                  | b <sup>++</sup>    | b <sup>*</sup> | b <sup>***</sup> | b <sup>0</sup>     | b <sup>0++</sup> | Seq. | y                  | y <sup>++</sup> | y <sup>*</sup>    | y <sup>***</sup> | y <sup>0</sup>     | y <sup>0++</sup> | #  |
|----|--------------------|--------------------|----------------|------------------|--------------------|------------------|------|--------------------|-----------------|-------------------|------------------|--------------------|------------------|----|
| 1  | 148.075690         | 74.541483          |                |                  |                    |                  | F    |                    |                 |                   |                  |                    |                  | 18 |
| 2  | 219.112804         | <b>110.060040</b>  |                |                  |                    |                  | A    | 2170.107350        | 1085.557313     | 2153.080801       | 1077.044038      | 2152.096785        | 1076.552030      | 17 |
| 3  | <b>356.171716</b>  | 178.589496         |                |                  |                    |                  | H    | 2099.070236        | 1050.038756     | 2082.043687       | 1041.525481      | 2081.059671        | 1041.033473      | 16 |
| 4  | <b>519.235045</b>  | 260.121161         |                |                  |                    |                  | Y    | 1962.011324        | 981.509300      | 1944.984775       | 972.996026       | 1944.000759        | 972.504018       | 15 |
| 5  | <b>618.303459</b>  | 309.655368         |                |                  |                    |                  | V    | 1798.947995        | 899.977636      | 1781.921446       | 891.464361       | 1780.937430        | 890.972353       | 14 |
| 6  | <b>717.371873</b>  | 359.189575         |                |                  |                    |                  | V    | <b>1699.879581</b> | 850.443429      | 1682.853032       | 841.930154       | 1681.869016        | 841.438146       | 13 |
| 7  | <b>818.419552</b>  | 409.713414         |                |                  | 800.408987         | 400.708132       | T    | <b>1600.811167</b> | 800.909222      | 1583.784618       | 792.395947       | 1582.800602        | 791.903939       | 12 |
| 8  | 905.451580         | 453.229428         |                |                  | 887.441015         | 444.224146       | S    | <b>1499.763488</b> | 750.385382      | 1482.736939       | 741.872108       | 1481.752923        | 741.380100       | 11 |
| 9  | <b>1344.676906</b> | 672.842091         | 1327.650357    | 664.328817       | <b>1326.666341</b> | 663.836808       | Q    | 1412.731460        | 706.869368      | 1395.704911       | 698.356094       | <b>1394.720895</b> | 697.864086       | 10 |
| 10 | <b>1443.745320</b> | 722.376298         | 1426.718771    | 713.863024       | 1425.734755        | 713.371016       | V    | <b>973.506134</b>  | 487.256705      | <b>956.479585</b> | 478.743431       | 955.495569         | 478.251423       | 9  |
| 11 | <b>1542.813734</b> | 771.910505         | 1525.787185    | 763.397231       | 1524.803169        | 762.905223       | V    | <b>874.437720</b>  | 437.722498      | <b>857.411171</b> | 429.209224       | 856.427155         | 428.717216       | 8  |
| 12 | 1656.856661        | 828.931969         | 1639.830112    | 820.418694       | 1638.846096        | 819.926686       | N    | <b>775.369306</b>  | 388.188291      | <b>758.342757</b> | 379.675017       | 757.358741         | 379.183009       | 7  |
| 13 | 1757.904340        | 879.455808         | 1740.877791    | 870.942534       | 1739.893775        | 870.450526       | T    | <b>661.326379</b>  | 331.166828      | 644.299830        | 322.653553       | 643.315814         | 322.161545       | 6  |
| 14 | 1828.941454        | 914.974365         | 1811.914905    | 906.461091       | 1810.930889        | 905.969083       | A    | <b>560.278700</b>  | 280.642988      | 543.252151        | 272.129714       | 542.268135         | 271.637706       | 5  |
| 15 | 1942.984381        | 971.995829         | 1925.957832    | 963.482554       | 1924.973816        | 962.990546       | N    | <b>489.241586</b>  | 245.124431      | 472.215037        | 236.611157       | 471.231021         | 236.119149       | 4  |
| 16 | 2072.026974        | <b>1036.517125</b> | 2055.000425    | 1028.003850      | 2054.016409        | 1027.511842      | E    | 375.198659         | 188.102968      | 358.172110        | 179.589693       | 357.188094         | 179.097685       | 3  |
| 17 | 2143.064088        | 1072.035682        | 2126.037539    | 1063.522407      | 2125.053523        | 1063.030399      | A    | <b>246.156066</b>  | 123.581671      | 229.129517        | 115.068397       |                    |                  | 2  |
| 18 |                    |                    |                |                  |                    |                  | R    | <b>175.118952</b>  | 88.063114       | 158.092403        | 79.549839        |                    |                  | 1  |

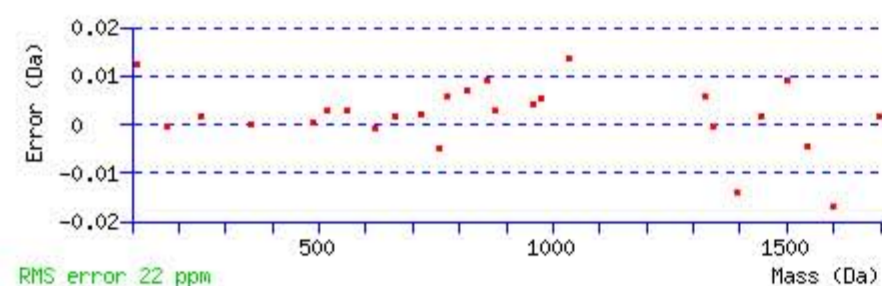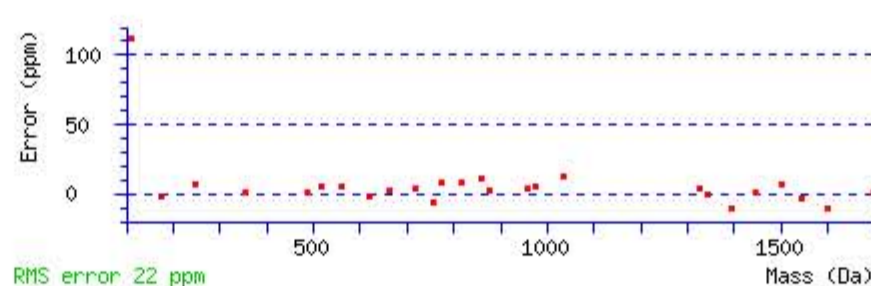

NCBI BLAST search of **FAHYVVTSQVVNTANEAR**

(Parameters: blastp, nr protein database, expect=20000, no filter, PAM30)

Other BLAST [web gateways](#)

All matches to this query

| Score | Mr(calc):   | Delta     | Sequence                           |
|-------|-------------|-----------|------------------------------------|
| 63.7  | 2316.168488 | -0.000506 | <a href="#">FAHYVVTSQVVNTANEAR</a> |

Mascot: <http://www.matrixscience.com/>

# Mascot Search Results

## Peptide View

MS/MS Fragmentation of **ADVQAHGEGQEFSTICLVDEEEMK**  
 Found in **ITIH1\_HUMAN**, Inter-alpha-trypsin inhibitor heavy chain H1 OS=Homo sapiens GN=ITIH1 PE=1 SV=3

Match to Query 54231: 3032.359152 from(1011.793660,3+) rtinseconds(2519) index(48957)  
 Title: Locus:1.1.1.3589.13 File:"2013-07-02 CLN FXIII 180 min 3rd F 4.wiff"  
 Data file C:\Program Files (x86)\Matrix Science\Mascot Daemon\mgf\9 FXIII 180 min 3rd\mascot\_daemon\_merge.mgf

Click mouse within plot area to zoom in by factor of two about that point  
 Or, Plot from  to  Da   
 Label all possible matches  Label matches used for scoring

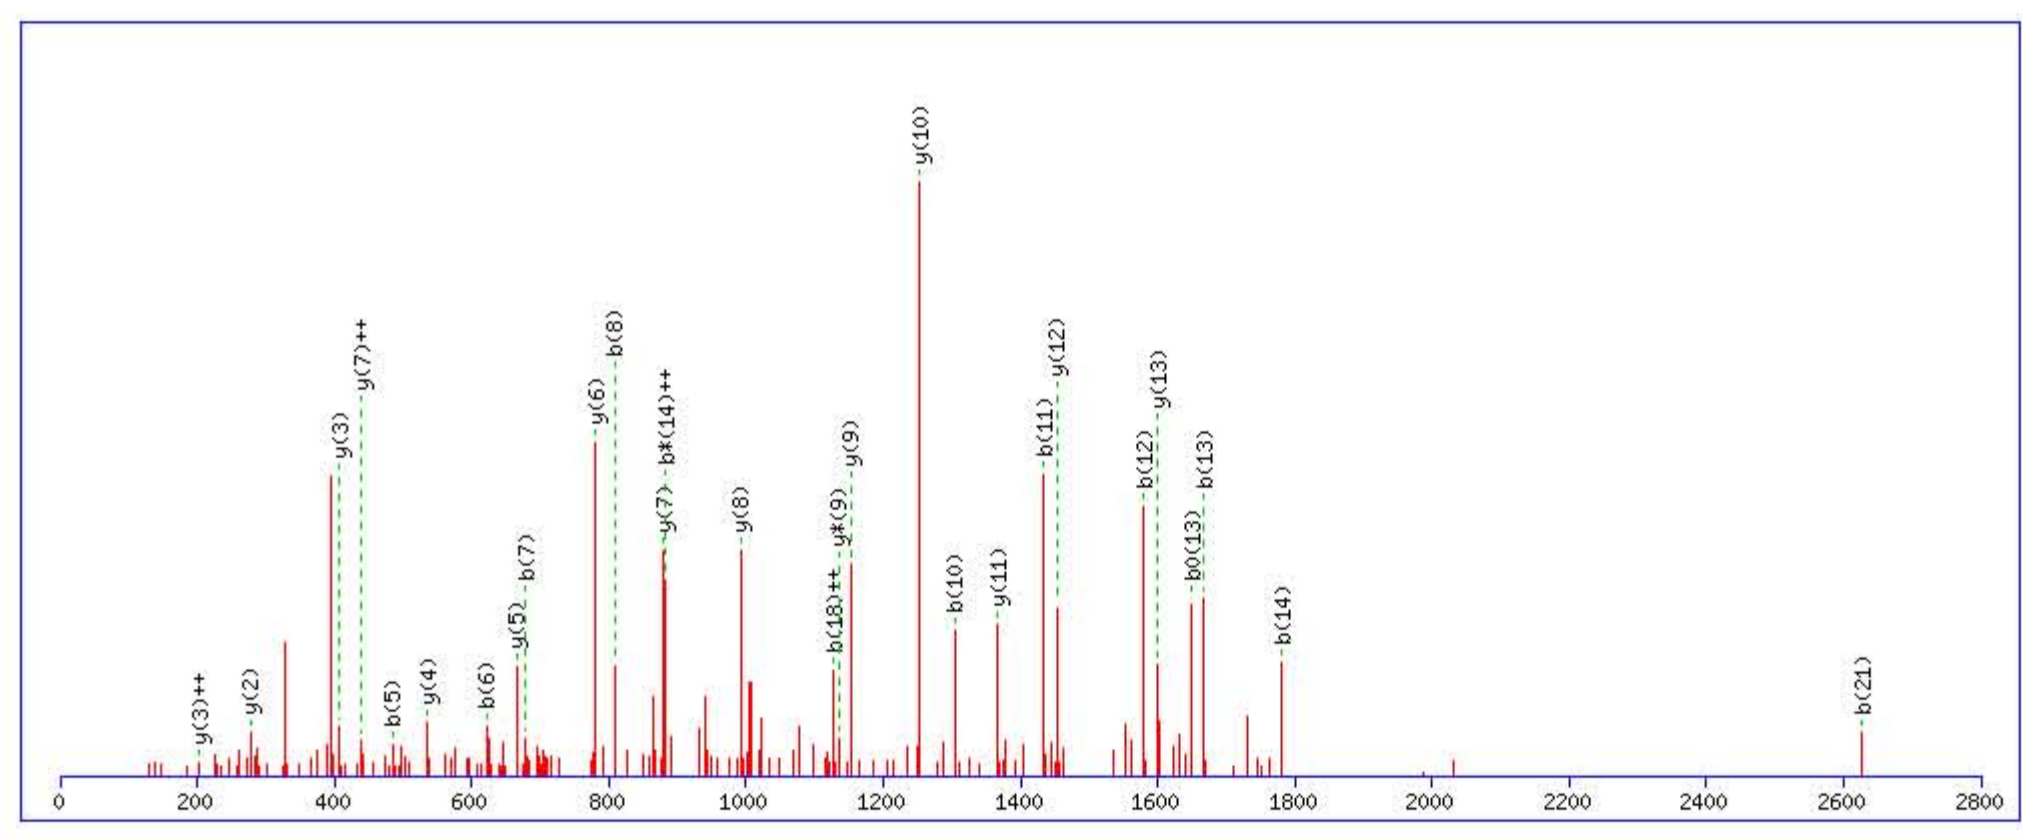

Monoisotopic mass of neutral peptide Mr(calc): 3032.356552  
 Fixed modifications: Carbamidomethyl (C) (apply to specified residues or termini only)  
 Variable modifications:  
 Q10 : Biotin:Thermo-21345 (Q)  
 Ions Score: 100 Expect: 7.5e-010  
 Matches : 28/264 fragment ions using 37 most intense peaks [\(help\)](#)

| #  | b                  | b <sup>++</sup>    | b <sup>+</sup> | b <sup>+++</sup>  | b <sup>0</sup>     | b <sup>0++</sup> | Seq. | y                  | y <sup>++</sup>   | y <sup>+</sup>     | y <sup>+++</sup> | y <sup>0</sup> | y <sup>0++</sup> | #  |
|----|--------------------|--------------------|----------------|-------------------|--------------------|------------------|------|--------------------|-------------------|--------------------|------------------|----------------|------------------|----|
| 1  | 72.044390          | 36.525833          |                |                   |                    |                  | A    |                    |                   |                    |                  |                |                  | 24 |
| 2  | 187.071333         | 94.039304          |                |                   | 169.060768         | 85.034022        | D    | 2962.326724        | 1481.667000       | 2945.300175        | 1473.153725      | 2944.316159    | 1472.661717      | 23 |
| 3  | 286.139747         | 143.573512         |                |                   | 268.129182         | 134.568229       | V    | 2847.299781        | 1424.153528       | 2830.273232        | 1415.640254      | 2829.289216    | 1415.148246      | 22 |
| 4  | 414.198325         | 207.602801         | 397.171776     | 199.089526        | 396.187760         | 198.597518       | Q    | 2748.231367        | 1374.619321       | 2731.204818        | 1366.106047      | 2730.220802    | 1365.614039      | 21 |
| 5  | <b>485.235439</b>  | 243.121357         | 468.208890     | 234.608083        | 467.224874         | 234.116075       | A    | 2620.172789        | 1310.590032       | 2603.146240        | 1302.076758      | 2602.162224    | 1301.584750      | 20 |
| 6  | <b>622.294351</b>  | 311.650814         | 605.267802     | 303.137539        | 604.283786         | 302.645531       | H    | 2549.135675        | 1275.071475       | 2532.109126        | 1266.558201      | 2531.125110    | 1266.066193      | 19 |
| 7  | <b>679.315815</b>  | 340.161546         | 662.289266     | 331.648271        | 661.305250         | 331.156263       | G    | 2412.076763        | 1206.542019       | 2395.050214        | 1198.028745      | 2394.066198    | 1197.536737      | 18 |
| 8  | <b>808.358408</b>  | 404.682842         | 791.331859     | 396.169568        | 790.347843         | 395.677560       | E    | 2355.055299        | 1178.031287       | 2338.028750        | 1169.518013      | 2337.044734    | 1169.026005      | 17 |
| 9  | 865.379872         | 433.193574         | 848.353323     | 424.680300        | 847.369307         | 424.188292       | G    | 2226.012706        | 1113.509991       | 2208.986157        | 1104.996716      | 2208.002141    | 1104.504708      | 16 |
| 10 | <b>1304.605198</b> | 652.806237         | 1287.578649    | 644.292963        | 1286.594633        | 643.800954       | Q    | 2168.991242        | 1084.999259       | 2151.964693        | 1076.485984      | 2150.980677    | 1075.993976      | 15 |
| 11 | <b>1433.647791</b> | 717.327534         | 1416.621242    | 708.814259        | 1415.637226        | 708.322251       | E    | 1729.765916        | 865.386596        | 1712.739367        | 856.873322       | 1711.755351    | 856.381314       | 14 |
| 12 | <b>1580.716205</b> | 790.861741         | 1563.689656    | 782.348466        | 1562.705640        | 781.856458       | F    | <b>1600.723323</b> | 800.865300        | 1583.696774        | 792.352025       | 1582.712758    | 791.860017       | 13 |
| 13 | <b>1667.748233</b> | 834.377755         | 1650.721684    | 825.864480        | <b>1649.737668</b> | 825.372472       | S    | <b>1453.654909</b> | 727.331093        | 1436.628360        | 718.817818       | 1435.644344    | 718.325810       | 12 |
| 14 | <b>1780.832297</b> | 890.919787         | 1763.805748    | <b>882.406512</b> | 1762.821732        | 881.914504       | I    | <b>1366.622881</b> | 683.815079        | 1349.596332        | 675.301804       | 1348.612316    | 674.809796       | 11 |
| 15 | 1881.879976        | 941.443626         | 1864.853427    | 932.930352        | 1863.869411        | 932.438344       | T    | <b>1253.538817</b> | 627.273047        | 1236.512268        | 618.759772       | 1235.528252    | 618.267764       | 10 |
| 16 | 2041.910625        | 1021.458951        | 2024.884076    | 1012.945676       | 2023.900060        | 1012.453668      | C    | <b>1152.491138</b> | 576.749207        | <b>1135.464589</b> | 568.235933       | 1134.480573    | 567.743925       | 9  |
| 17 | 2154.994689        | 1078.000983        | 2137.968140    | 1069.487708       | 2136.984124        | 1068.995700      | L    | <b>992.460489</b>  | 496.733883        | 975.433940         | 488.220608       | 974.449924     | 487.728600       | 8  |
| 18 | 2254.063103        | <b>1127.535189</b> | 2237.036554    | 1119.021915       | 2236.052538        | 1118.529907      | V    | <b>879.376425</b>  | <b>440.191851</b> | 862.349876         | 431.678576       | 861.365860     | 431.186568       | 7  |
| 19 | 2369.090046        | 1185.048661        | 2352.063497    | 1176.535386       | 2351.079481        | 1176.043378      | D    | <b>780.308011</b>  | 390.657644        | 763.281462         | 382.144369       | 762.297446     | 381.652361       | 6  |
| 20 | 2498.132639        | 1249.569957        | 2481.106090    | 1241.056683       | 2480.122074        | 1240.564675      | E    | <b>665.281068</b>  | 333.144172        | 648.254519         | 324.630898       | 647.270503     | 324.138890       | 5  |
| 21 | <b>2627.175232</b> | 1314.091254        | 2610.148683    | 1305.577979       | 2609.164667        | 1305.085971      | E    | <b>536.238475</b>  | 268.622876        | 519.211926         | 260.109601       | 518.227910     | 259.617593       | 4  |
| 22 | 2756.217825        | 1378.612551        | 2739.191276    | 1370.099276       | 2738.207260        | 1369.607268      | E    | <b>407.195882</b>  | <b>204.101579</b> | 390.169333         | 195.588305       | 389.185317     | 195.096297       | 3  |
| 23 | 2887.258310        | 1444.132793        | 2870.231761    | 1435.619518       | 2869.247745        | 1435.127511      | M    | <b>278.153289</b>  | 139.580282        | 261.126740         | 131.067008       |                |                  | 2  |
| 24 |                    |                    |                |                   |                    |                  | K    | 147.112804         | 74.060040         | 130.086255         | 65.546765        |                |                  | 1  |

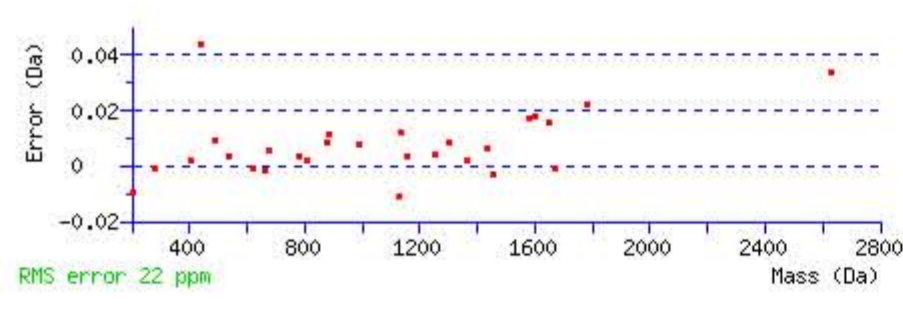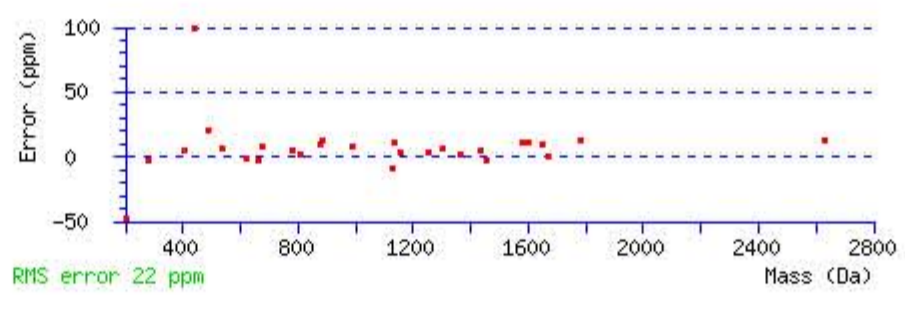

NCBI BLAST search of **ADVQAHGEGQEFSTICLVDEEEMK**  
 (Parameters: blastp, nr protein database, expect=20000, no filter, PAM30)  
 Other BLAST [web gateways](#)

### All matches to this query

| Score | Mr(calc):   | Delta    | Sequence                                 |
|-------|-------------|----------|------------------------------------------|
| 99.8  | 3032.356552 | 0.002600 | <a href="#">ADVQAHGEGQEFSTICLVDEEEMK</a> |
| 73.3  | 3032.356552 | 0.002600 | <a href="#">ADVQAHGEGQEFSTICLVDEEEMK</a> |

# MASCOT Search Results

## Peptide View

MS/MS Fragmentation of **GMADQDGLKPTIDKPSDPSPPLEMLGPR**

Found in **ITIH1\_HUMAN**, Inter-alpha-trypsin inhibitor heavy chain H1 OS=Homo sapiens GN=ITIH1 PE=1 SV=3

Match to Query 58186: 3304.619896 from(827.162250,4+) rtinseconds(2240) index(47487)

Title: Locus:1.1.1.3492.21 File:"2013-07-02 CLN FXIII 180 min 3rd F 4.wiff"

Data file C:\Program Files (x86)\Matrix Science\Mascot Daemon\mgf9 FXIII 180 min 3rd\mascot\_daemon\_merge.mgf

Click mouse within plot area to zoom in by factor of two about that point

Or, Plot from  to  Da

Label all possible matches  Label matches used for scoring

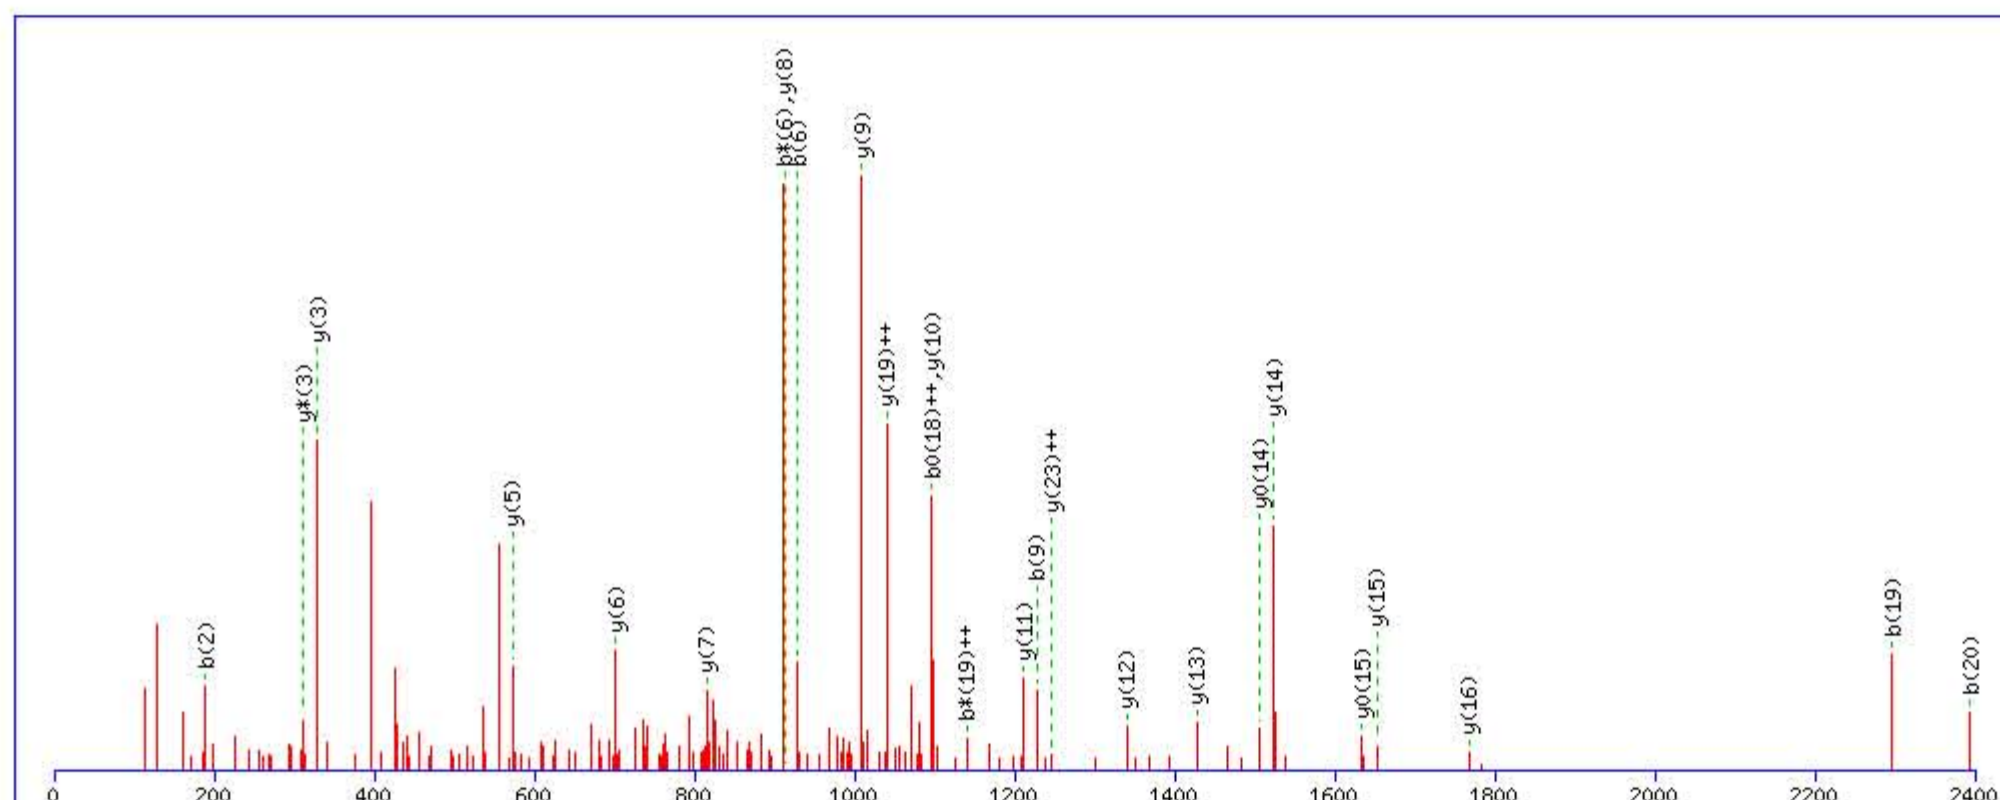

Monoisotopic mass of neutral peptide Mr(calc): 3304.614151

Fixed modifications: Carbamidomethyl (C) (apply to specified residues or termini only)

Variable modifications:

Q5 : Biotin:Thermo-21345 (Q)

Ions Score: 85 Expect: 8.5e-008

Matches : 26/300 fragment ions using 36 most intense peaks [\(help\)](#)

| #  | b                  | b <sup>++</sup> | b <sup>*</sup>    | b <sup>***</sup>   | b <sup>0</sup> | b <sup>0++</sup>   | Seq. | y                  | y <sup>++</sup>    | y <sup>*</sup>    | y <sup>***</sup> | y <sup>0</sup>     | y <sup>0++</sup> | #  |
|----|--------------------|-----------------|-------------------|--------------------|----------------|--------------------|------|--------------------|--------------------|-------------------|------------------|--------------------|------------------|----|
| 1  | 58.028740          | 29.518008       |                   |                    |                |                    | G    |                    |                    |                   |                  |                    |                  | 28 |
| 2  | <b>189.069225</b>  | 95.038250       |                   |                    |                |                    | M    | 3248.599985        | 1624.803630        | 3231.573436       | 1616.290356      | 3230.589420        | 1615.798348      | 27 |
| 3  | 260.106339         | 130.556807      |                   |                    |                |                    | A    | 3117.559500        | 1559.283388        | 3100.532951       | 1550.770113      | 3099.548935        | 1550.278105      | 26 |
| 4  | 375.133282         | 188.070279      |                   |                    | 357.122717     | 179.064997         | D    | 3046.522386        | 1523.764831        | 3029.495837       | 1515.251556      | 3028.511821        | 1514.759548      | 25 |
| 5  | 814.358608         | 407.682942      | 797.332059        | 399.169668         | 796.348043     | 398.677660         | Q    | 2931.495443        | 1466.251359        | 2914.468894       | 1457.738085      | 2913.484878        | 1457.246077      | 24 |
| 6  | <b>929.385551</b>  | 465.196414      | <b>912.359002</b> | 456.683139         | 911.374986     | 456.191131         | D    | 2492.270117        | <b>1246.638696</b> | 2475.243568       | 1238.125422      | 2474.259552        | 1237.633414      | 23 |
| 7  | 986.407015         | 493.707146      | 969.380466        | 485.193871         | 968.396450     | 484.701863         | G    | 2377.243174        | 1189.125225        | 2360.216625       | 1180.611950      | 2359.232609        | 1180.119942      | 22 |
| 8  | 1099.491079        | 550.249177      | 1082.464530       | 541.735903         | 1081.480514    | 541.243895         | L    | 2320.221710        | 1160.614493        | 2303.195161       | 1152.101218      | 2302.211145        | 1151.609210      | 21 |
| 9  | <b>1227.586042</b> | 614.296659      | 1210.559493       | 605.783385         | 1209.575477    | 605.291376         | K    | 2207.137646        | 1104.072461        | 2190.111097       | 1095.559186      | 2189.127081        | 1095.067178      | 20 |
| 10 | 1324.638806        | 662.823041      | 1307.612257       | 654.309767         | 1306.628241    | 653.817758         | P    | 2079.042683        | <b>1040.024980</b> | 2062.016134       | 1031.511705      | 2061.032118        | 1031.019697      | 19 |
| 11 | 1425.686485        | 713.346881      | 1408.659936       | 704.833606         | 1407.675920    | 704.341598         | T    | 1981.989919        | 991.498598         | 1964.963370       | 982.985323       | 1963.979354        | 982.493315       | 18 |
| 12 | 1538.770549        | 769.888912      | 1521.744000       | 761.375638         | 1520.759984    | 760.883630         | I    | 1880.942240        | 940.974758         | 1863.915691       | 932.461484       | 1862.931675        | 931.969476       | 17 |
| 13 | 1653.797492        | 827.402384      | 1636.770943       | 818.889110         | 1635.786927    | 818.397101         | D    | <b>1767.858176</b> | 884.432726         | 1750.831627       | 875.919452       | 1749.847611        | 875.427444       | 16 |
| 14 | 1781.892455        | 891.449865      | 1764.865906       | 882.936591         | 1763.881890    | 882.444583         | K    | <b>1652.831233</b> | 826.919255         | 1635.804684       | 818.405980       | <b>1634.820668</b> | 817.913972       | 15 |
| 15 | 1878.945219        | 939.976248      | 1861.918670       | 931.462973         | 1860.934654    | 930.970965         | P    | <b>1524.736270</b> | 762.871773         | 1507.709721       | 754.358499       | <b>1506.725705</b> | 753.866491       | 14 |
| 16 | 1965.977247        | 983.492262      | 1948.950698       | 974.978987         | 1947.966682    | 974.486979         | S    | <b>1427.683506</b> | 714.345391         | 1410.656957       | 705.832117       | 1409.672941        | 705.340109       | 13 |
| 17 | 2095.019840        | 1048.013558     | 2077.993291       | 1039.500283        | 2077.009275    | 1039.008275        | E    | <b>1340.651478</b> | 670.829377         | 1323.624929       | 662.316103       | 1322.640913        | 661.824095       | 12 |
| 18 | 2210.046783        | 1105.527029     | 2193.020234       | 1097.013755        | 2192.036218    | <b>1096.521747</b> | D    | <b>1211.608885</b> | 606.308081         | 1194.582336       | 597.794806       | 1193.598320        | 597.302798       | 11 |
| 19 | <b>2297.078811</b> | 1149.043043     | 2280.052262       | <b>1140.529769</b> | 2279.068246    | 1140.037761        | S    | <b>1096.581942</b> | 548.794609         | 1079.555393       | 540.281335       | 1078.571377        | 539.789327       | 10 |
| 20 | <b>2394.131575</b> | 1197.569425     | 2377.105026       | 1189.056151        | 2376.121010    | 1188.564143        | P    | <b>1009.549914</b> | 505.278595         | 992.523365        | 496.765321       | 991.539349         | 496.273313       | 9  |
| 21 | 2491.184339        | 1246.095807     | 2474.157790       | 1237.582533        | 2473.173774    | 1237.090525        | P    | <b>912.497150</b>  | 456.752213         | 895.470601        | 448.238939       | 894.486585         | 447.746931       | 8  |
| 22 | 2604.268403        | 1302.637839     | 2587.241854       | 1294.124565        | 2586.257838    | 1293.632557        | L    | <b>815.444386</b>  | 408.225831         | 798.417837        | 399.712557       | 797.433821         | 399.220549       | 7  |
| 23 | 2733.310996        | 1367.159136     | 2716.284447       | 1358.645861        | 2715.300431    | 1358.153854        | E    | <b>702.360322</b>  | 351.683799         | 685.333773        | 343.170525       | 684.349757         | 342.678517       | 6  |
| 24 | 2864.351481        | 1432.679379     | 2847.324932       | 1424.166104        | 2846.340916    | 1423.674096        | M    | <b>573.317729</b>  | 287.162503         | 556.291180        | 278.649228       |                    |                  | 5  |
| 25 | 2977.435545        | 1489.221411     | 2960.408996       | 1480.708136        | 2959.424980    | 1480.216128        | L    | 442.277244         | 221.642260         | 425.250695        | 213.128986       |                    |                  | 4  |
| 26 | 3034.457009        | 1517.732143     | 3017.430460       | 1509.218868        | 3016.446444    | 1508.726860        | G    | <b>329.193180</b>  | 165.100228         | <b>312.166631</b> | 156.586953       |                    |                  | 3  |
| 27 | 3131.509773        | 1566.258525     | 3114.483224       | 1557.745250        | 3113.499208    | 1557.253242        | P    | 272.171716         | 136.589496         | 255.145167        | 128.076221       |                    |                  | 2  |
| 28 |                    |                 |                   |                    |                |                    | R    | 175.118952         | 88.063114          | 158.092403        | 79.549839        |                    |                  | 1  |

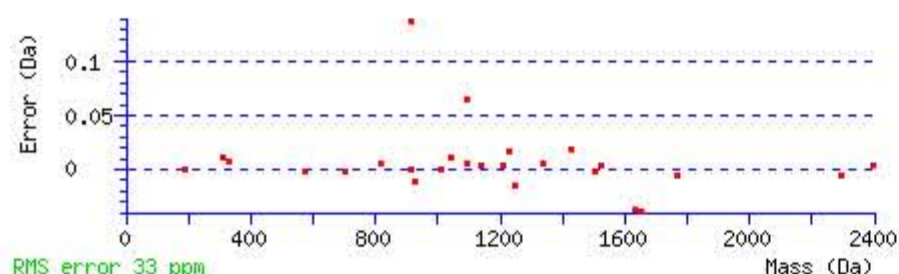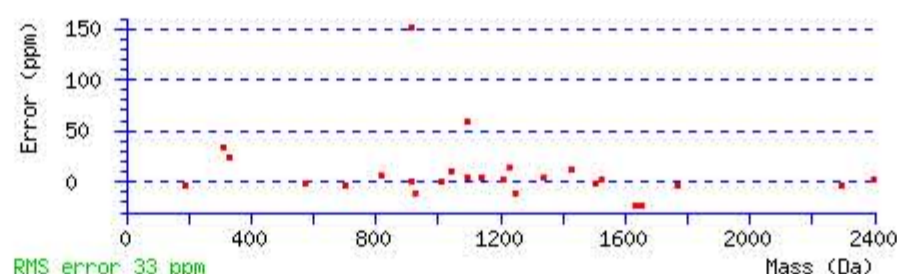

NCBI BLAST search of **GMADQDGLKPTIDKPSDPSPPLEMLGPR**  
(Parameters: blastp, nr protein database, expect=20000, no filter, PAM30)

Other BLAST [web gateways](#)

## All matches to this query

| Score | Mr(calc):   | Delta    | Sequence                            |
|-------|-------------|----------|-------------------------------------|
| 84.8  | 3304.614151 | 0.005745 | <b>GMADQDGLKPTIDKPSDPSPPLEMLGPR</b> |

Mascot: <http://www.matrixscience.com/>

# MASCOT SCIENCE Mascot Search Results

## Peptide View

### MS/MS Fragmentation of TQVADAK

Found in **ITIH2\_HUMAN**, Inter-alpha-trypsin inhibitor heavy chain H2 OS=Homo sapiens GN=ITIH2 PE=1 SV=2

Match to Query 12688: 1042.544688 from(522.279620,2+) rtinseconds(1317) index(41902)

Title: Locus:1.1.1.3171.10 File:"2013-07-02 CLN FXIII 180 min 3rd F 4.wiff"

Data file C:\Program Files (x86)\Matrix Science\Mascot Daemon\mgf9 FXIII 180 min 3rd\mascot\_daemon\_merge.mgf

Click mouse within plot area to zoom in by factor of two about that point

Or, Plot from  to  Da

Label all possible matches  Label matches used for scoring

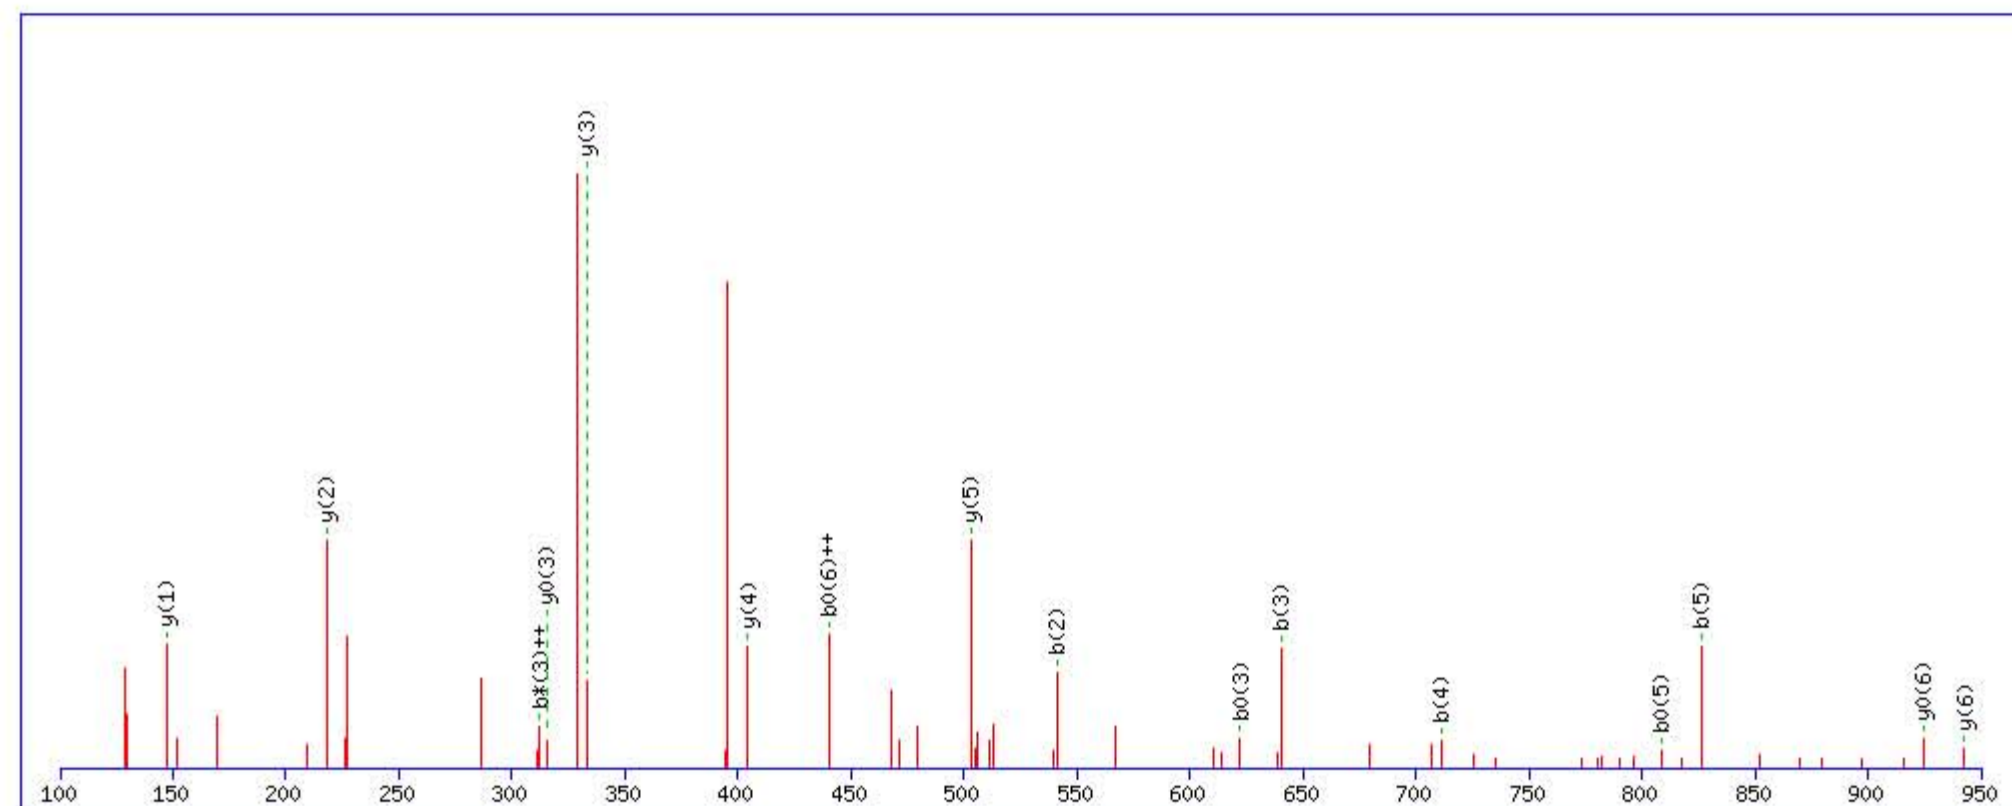

Monoisotopic mass of neutral peptide Mr(calc): 1042.548111

Fixed modifications: Carbamidomethyl (C) (apply to specified residues or termini only)

Variable modifications:

Q2 : Biotin:Thermo-21345 (Q)

Ions Score: 32 Expect: 0.016

Matches : 16/66 fragment ions using 33 most intense peaks [\(help\)](#)

| # | b                 | b <sup>++</sup> | b <sup>*</sup> | b <sup>+++</sup>  | b <sup>0</sup>    | b <sup>0++</sup>  | Seq. | y                 | y <sup>++</sup> | y <sup>*</sup> | y <sup>+++</sup> | y <sup>0</sup>    | y <sup>0++</sup> | # |
|---|-------------------|-----------------|----------------|-------------------|-------------------|-------------------|------|-------------------|-----------------|----------------|------------------|-------------------|------------------|---|
| 1 | 102.054955        | 51.531116       |                |                   | 84.044390         | 42.525833         | T    |                   |                 |                |                  |                   |                  | 7 |
| 2 | <b>541.280281</b> | 271.143779      | 524.253732     | 262.630504        | 523.269716        | 262.138496        | Q    | <b>942.507715</b> | 471.757496      | 925.481166     | 463.244221       | <b>924.497150</b> | 462.752213       | 6 |
| 3 | <b>640.348695</b> | 320.677986      | 623.322146     | <b>312.164711</b> | <b>622.338130</b> | 311.672703        | V    | <b>503.282389</b> | 252.144832      | 486.255840     | 243.631558       | 485.271824        | 243.139550       | 5 |
| 4 | <b>711.385809</b> | 356.196543      | 694.359260     | 347.683268        | 693.375244        | 347.191260        | A    | <b>404.213975</b> | 202.610625      | 387.187426     | 194.097351       | 386.203410        | 193.605343       | 4 |
| 5 | <b>826.412752</b> | 413.710014      | 809.386203     | 405.196739        | <b>808.402187</b> | 404.704731        | D    | <b>333.176861</b> | 167.092068      | 316.150312     | 158.578794       | <b>315.166296</b> | 158.086786       | 3 |
| 6 | 897.449866        | 449.228571      | 880.423317     | 440.715296        | 879.439301        | <b>440.223288</b> | A    | <b>218.149918</b> | 109.578597      | 201.123369     | 101.065322       |                   |                  | 2 |
| 7 |                   |                 |                |                   |                   |                   | K    | <b>147.112804</b> | 74.060040       | 130.086255     | 65.546765        |                   |                  | 1 |

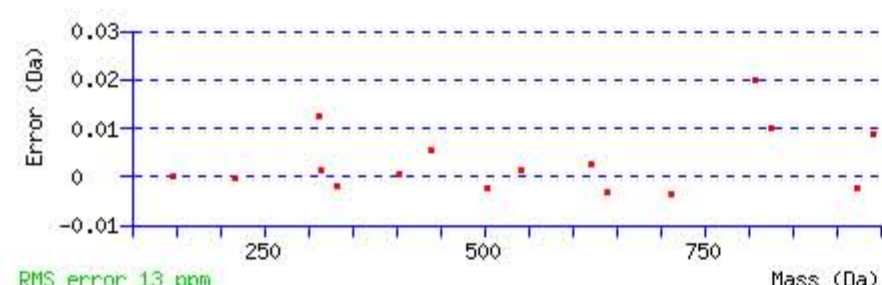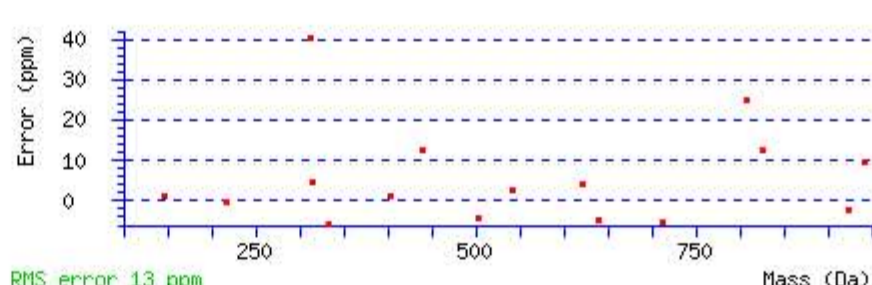

### NCBI BLAST search of TQVADAK

(Parameters: blastp, nr protein database, expect=20000, no filter, PAM30)

Other BLAST [web gateways](#)

### All matches to this query

| Score | Mr(calc):   | Delta     | Sequence                   |
|-------|-------------|-----------|----------------------------|
| 32.2  | 1042.548111 | -0.003423 | <a href="#">TQVADAK</a>    |
| 16.7  | 1042.540726 | 0.003962  | <a href="#">KPVSEVGDGR</a> |
| 11.1  | 1042.548096 | -0.003408 | <a href="#">SLQADAK</a>    |
| 9.4   | 1042.540680 | 0.004008  | <a href="#">EAEKRPADK</a>  |
| 6.1   | 1042.559357 | -0.014669 | <a href="#">KTVPPCVSR</a>  |
| 5.8   | 1042.529480 | 0.015208  | <a href="#">TSPQPESGIK</a> |
| 4.9   | 1042.548080 | -0.003392 | <a href="#">KEQEAK</a>     |
| 4.9   | 1042.548080 | -0.003392 | <a href="#">KQEEAK</a>     |
| 4.2   | 1042.540710 | 0.003978  | <a href="#">SLKSPPGSDR</a> |
| 3.8   | 1042.544724 | -0.000036 | <a href="#">WKGIEPGEK</a>  |

# **MASCOT** Mascot Search Results

## Peptide View

MS/MS Fragmentation of **ALYAQAR**

Found in **ITIH2\_HUMAN**, Inter-alpha-trypsin inhibitor heavy chain H2 OS=Homo sapiens GN=ITIH2 PE=1 SV=2

Match to Query 13868: 1102.592188 from(552.303370,2+) rtinseconds(1695) index(44115)  
 Title: Locus:1.1.1.3303.5 File:"2013-07-02 CLN FXIII 180 min 3rd F 4.wiff"  
 Data file C:\Program Files (x86)\Matrix Science\Mascot Daemon\mgf\9 FXIII 180 min 3rd\mascot\_daemon\_merge.mgf

Click mouse within plot area to zoom in by factor of two about that point

Or, Plot from  to  Da

Label all possible matches  Label matches used for scoring

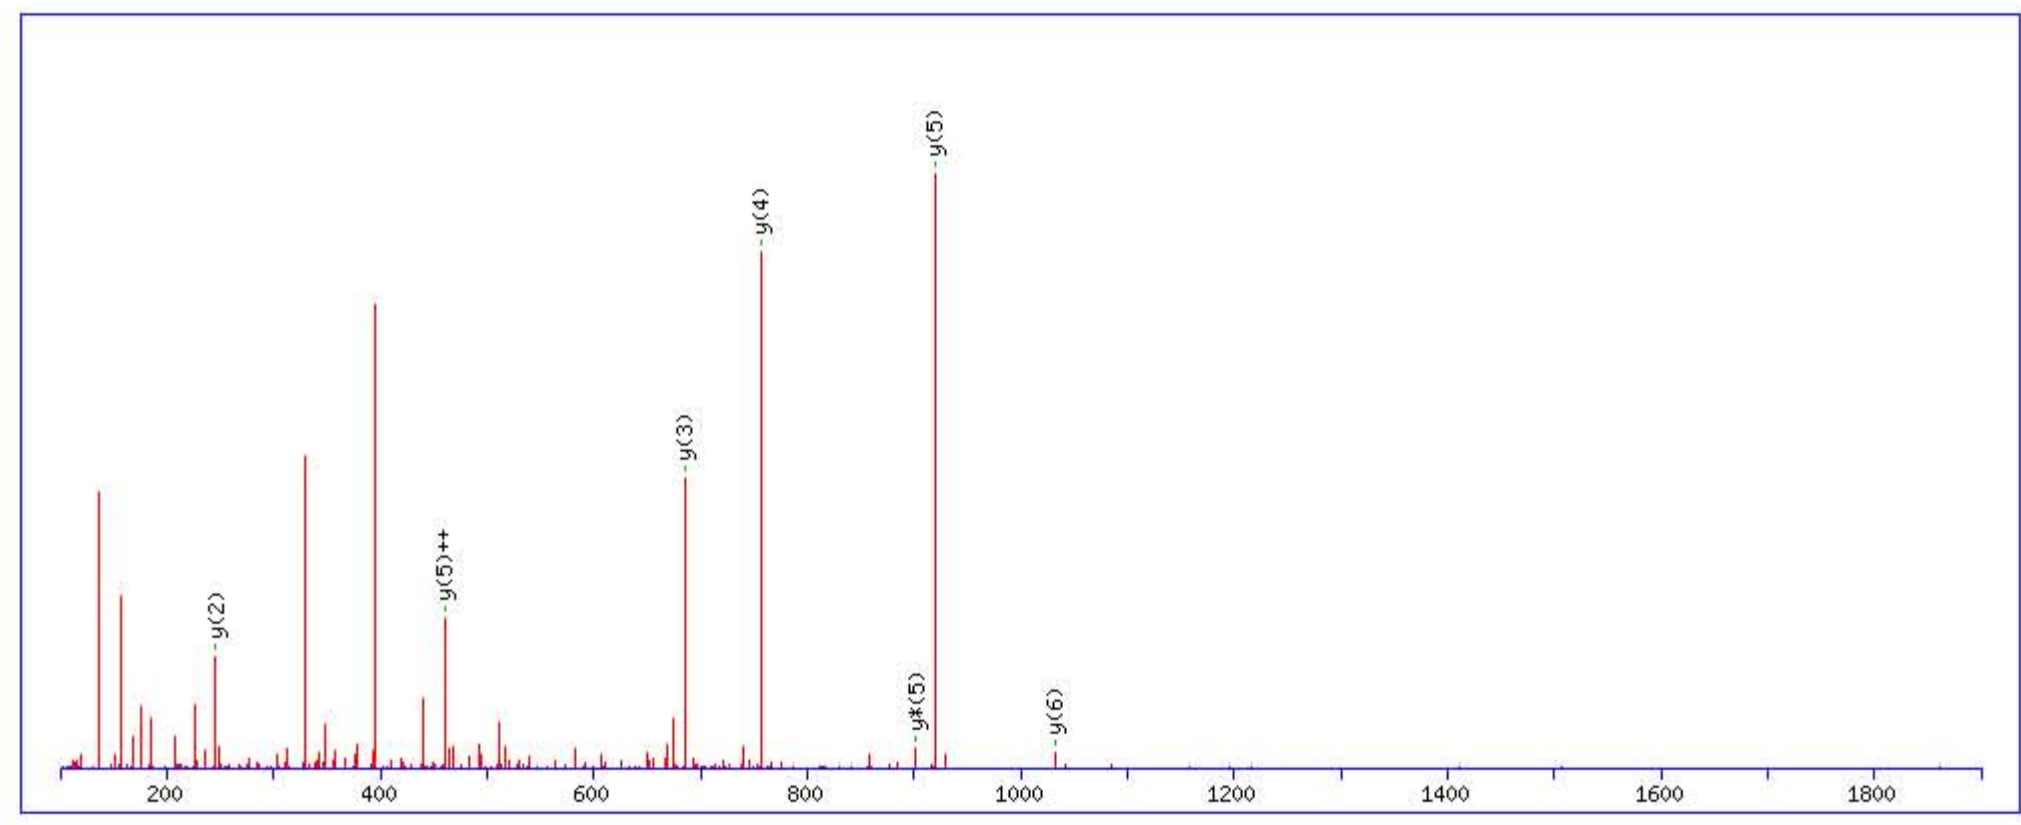

Monoisotopic mass of neutral peptide Mr(calc): 1102.595703  
 Fixed modifications: Carbamidomethyl (C) (apply to specified residues or termini only)  
 Variable modifications:  
 Q5 : Biotin:Thermo-21345 (Q)  
 Ions Score: 38 Expect: 0.004  
 Matches : 7/40 fragment ions using 10 most intense peaks [\(help\)](#)

| # | b          | b <sup>++</sup> | b <sup>*</sup> | b <sup>*++</sup> | Seq. | y                  | y <sup>++</sup>   | y <sup>*</sup>    | y <sup>*++</sup> | # |
|---|------------|-----------------|----------------|------------------|------|--------------------|-------------------|-------------------|------------------|---|
| 1 | 72.044390  | 36.525833       |                |                  | A    |                    |                   |                   |                  | 7 |
| 2 | 185.128454 | 93.067865       |                |                  | L    | <b>1032.565899</b> | 516.786588        | 1015.539350       | 508.273313       | 6 |
| 3 | 348.191783 | 174.599529      |                |                  | Y    | <b>919.481835</b>  | <b>460.244556</b> | <b>902.455286</b> | 451.731281       | 5 |
| 4 | 419.228897 | 210.118087      |                |                  | A    | <b>756.418506</b>  | 378.712891        | 739.391957        | 370.199617       | 4 |
| 5 | 858.454223 | 429.730750      | 841.427674     | 421.217475       | Q    | <b>685.381392</b>  | 343.194334        | 668.354843        | 334.681060       | 3 |
| 6 | 929.491337 | 465.249307      | 912.464788     | 456.736032       | A    | <b>246.156066</b>  | 123.581671        | 229.129517        | 115.068397       | 2 |
| 7 |            |                 |                |                  | R    | 175.118952         | 88.063114         | 158.092403        | 79.549840        | 1 |

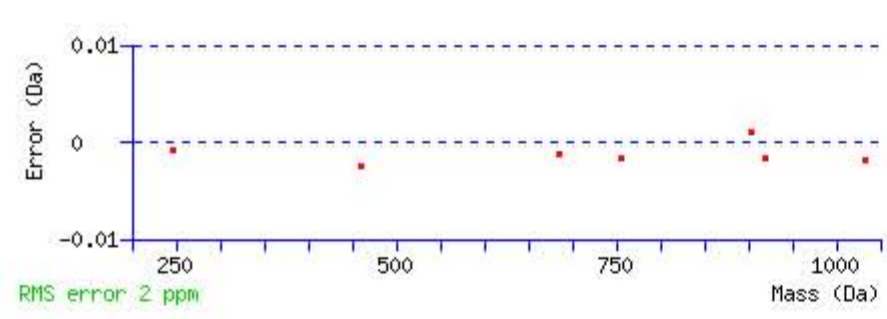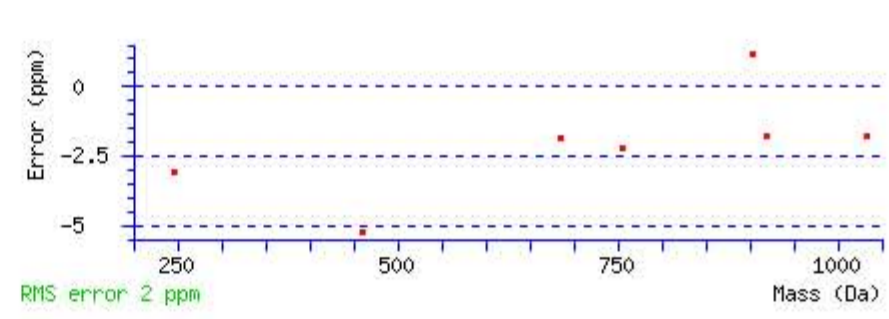

NCBI BLAST search of **ALYAQAR**  
 (Parameters: blastp, nr protein database, expect=20000, no filter, PAM30)  
 Other BLAST [web gateways](#)

### All matches to this query

| Score | Mr(calc):   | Delta     | Sequence                   |
|-------|-------------|-----------|----------------------------|
| 37.8  | 1102.595703 | -0.003515 | <a href="#">ALYAQAR</a>    |
| 11.8  | 1102.580460 | 0.011728  | <a href="#">AMVENVTLAR</a> |
| 10.9  | 1102.602234 | -0.010046 | <a href="#">AIELGYNPVK</a> |
| 6.0   | 1102.591660 | 0.000528  | <a href="#">AMKRLEEAR</a>  |
| 5.0   | 1102.591690 | 0.000498  | <a href="#">NMEVSLVRR</a>  |
| 4.8   | 1102.588333 | 0.003855  | <a href="#">SPYGLTPRGR</a> |
| 2.3   | 1102.580475 | 0.011713  | <a href="#">SPQMVSAIVR</a> |
| 2.2   | 1102.580475 | 0.011713  | <a href="#">ALSLVIGDCR</a> |
| 2.2   | 1102.602249 | -0.010061 | <a href="#">AIVLFNPDSK</a> |
| 1.8   | 1102.584305 | 0.007883  | <a href="#">QSSQRGLTAR</a> |



# MASCOT Search Results

## Peptide View

MS/MS Fragmentation of **VQSTITSR**

Found in **ITIH2\_HUMAN**, Inter-alpha-trypsin inhibitor heavy chain H2 OS=Homo sapiens GN=ITIH2 PE=1 SV=2

Match to Query 17787: 1201.644968 from(601.829760,2+) rtinseconds(1526) index(43051)

Title: Locus:1.1.1.3244.9 File:"2013-07-02 CLN FXIII 180 min 3rd F 4.wiff"

Data file C:\Program Files (x86)\Matrix Science\Mascot Daemon\mgf\9 FXIII 180 min 3rd\mascot\_daemon\_merge.mgf

Click mouse within plot area to zoom in by factor of two about that point

Or, Plot from  to  Da

Label all possible matches  Label matches used for scoring

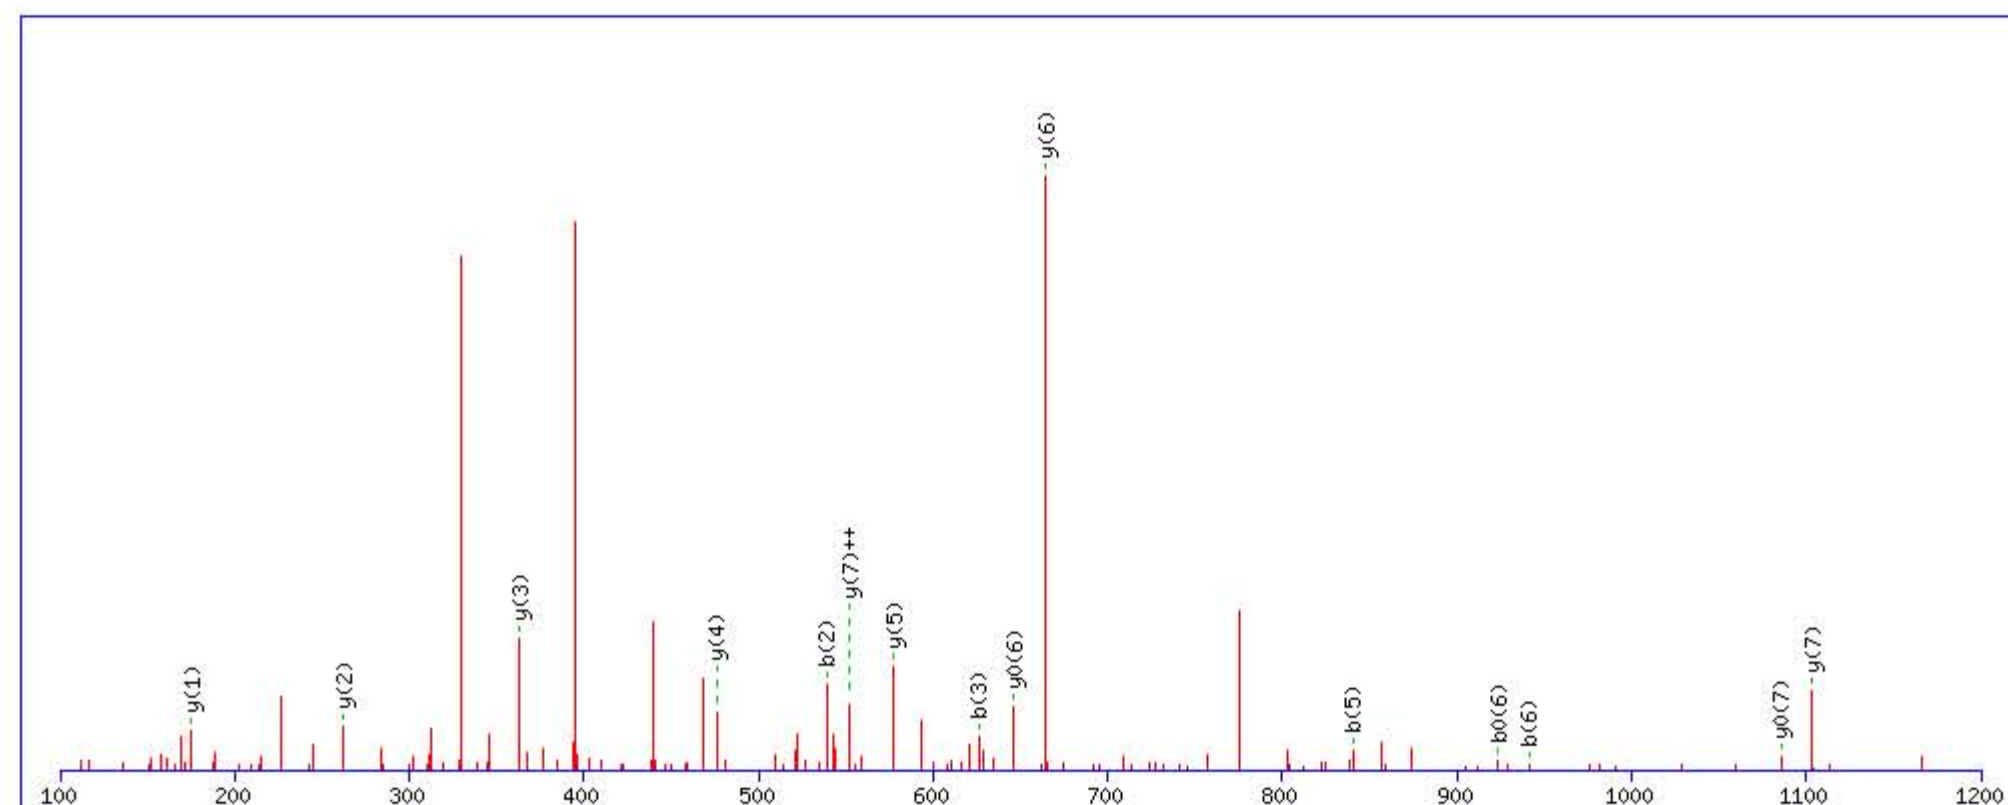

Monoisotopic mass of neutral peptide Mr(calc): 1201.648895

Fixed modifications: Carbamidomethyl (C) (apply to specified residues or termini only)

Variable modifications:

Q2 : Biotin:Thermo-21345 (Q)

Ions Score: 38 Expect: 0.0016

Matches : 15/76 fragment ions using 32 most intense peaks [\(help\)](#)

| # | b                 | b <sup>++</sup> | b <sup>+</sup> | b <sup>*++</sup> | b <sup>0</sup>    | b <sup>0++</sup> | Seq. | y                  | y <sup>++</sup>   | y <sup>+</sup> | y <sup>*++</sup> | y <sup>0</sup>     | y <sup>0++</sup> | # |
|---|-------------------|-----------------|----------------|------------------|-------------------|------------------|------|--------------------|-------------------|----------------|------------------|--------------------|------------------|---|
| 1 | 100.075690        | 50.541483       |                |                  |                   |                  | V    |                    |                   |                |                  |                    |                  | 8 |
| 2 | <b>539.301016</b> | 270.154146      | 522.274467     | 261.640872       |                   |                  | Q    | <b>1103.587756</b> | <b>552.297516</b> | 1086.561207    | 543.784242       | <b>1085.577191</b> | 543.292234       | 7 |
| 3 | <b>626.333044</b> | 313.670160      | 609.306495     | 305.156886       | 608.322479        | 304.664878       | S    | <b>664.362430</b>  | 332.684853        | 647.335881     | 324.171579       | <b>646.351865</b>  | 323.679571       | 6 |
| 4 | 727.380723        | 364.194000      | 710.354174     | 355.680725       | 709.370158        | 355.188717       | T    | <b>577.330402</b>  | 289.168839        | 560.303853     | 280.655565       | 559.319837         | 280.163557       | 5 |
| 5 | <b>840.464787</b> | 420.736032      | 823.438238     | 412.222757       | 822.454222        | 411.730749       | I    | <b>476.282723</b>  | 238.645000        | 459.256174     | 230.131725       | 458.272158         | 229.639717       | 4 |
| 6 | <b>941.512466</b> | 471.259871      | 924.485917     | 462.746597       | <b>923.501901</b> | 462.254589       | T    | <b>363.198659</b>  | 182.102968        | 346.172110     | 173.589693       | 345.188094         | 173.097685       | 3 |
| 7 | 1028.544494       | 514.775885      | 1011.517945    | 506.262611       | 1010.533929       | 505.770603       | S    | <b>262.150980</b>  | 131.579128        | 245.124431     | 123.065854       | 244.140415         | 122.573846       | 2 |
| 8 |                   |                 |                |                  |                   |                  | R    | <b>175.118952</b>  | 88.063114         | 158.092403     | 79.549839        |                    |                  | 1 |

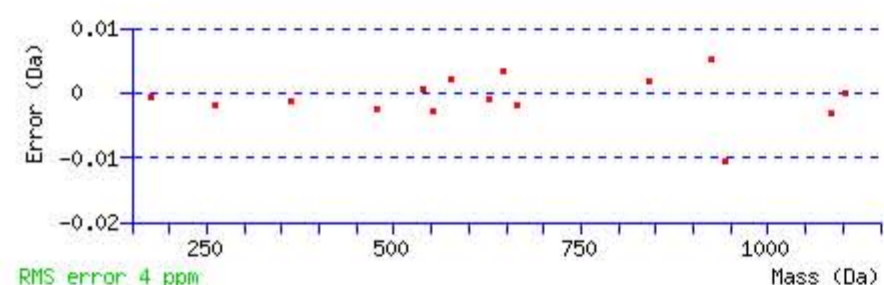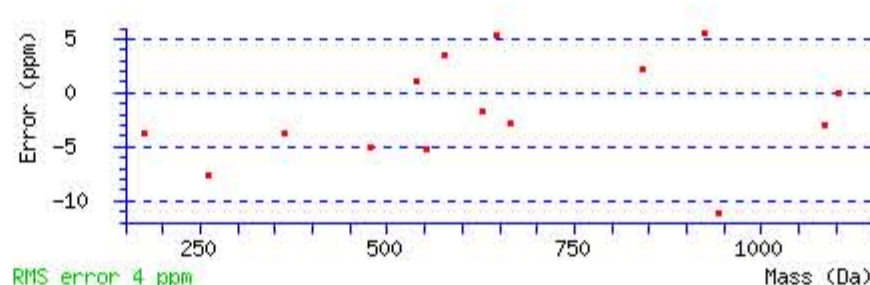

NCBI BLAST search of **VQSTITSR**

(Parameters: blastp, nr protein database, expect=20000, no filter, PAM30)

Other BLAST [web gateways](#)

All matches to this query

| Score | Mr(calc):   | Delta     | Sequence                     |
|-------|-------------|-----------|------------------------------|
| 37.6  | 1201.648895 | -0.003927 | <a href="#">VQSTITSR</a>     |
| 7.5   | 1201.638992 | 0.005976  | <a href="#">VQPPSHAR</a>     |
| 3.7   | 1201.641495 | 0.003473  | <a href="#">NLTNVLGTQSR</a>  |
| 3.5   | 1201.630249 | 0.014719  | <a href="#">KLD AEDVIGSR</a> |
| 2.2   | 1201.638992 | 0.005976  | <a href="#">VQGREFR</a>      |

Mascot: <http://www.matrixscience.com/>

# MASCOT Search Results

## Peptide View

MS/MS Fragmentation of **MATTMIQSK**

Found in **ITIH2\_HUMAN**, Inter-alpha-trypsin inhibitor heavy chain H2 OS=Homo sapiens GN=ITIH2 PE=1 SV=2

Match to Query 21042: 1336.652948 from(669.333750,2+) rtinseconds(1561) index(43255)

Title: Locus:1.1.1.3256.8 File:"2013-07-02 CLN FXIII 180 min 3rd F 4.wiff"

Data file C:\Program Files (x86)\Matrix Science\Mascot Daemon\mgf\9 FXIII 180 min 3rd\mascot\_daemon\_merge.mgf

Click mouse within plot area to zoom in by factor of two about that point

Or, Plot from  to  Da

Label all possible matches  Label matches used for scoring

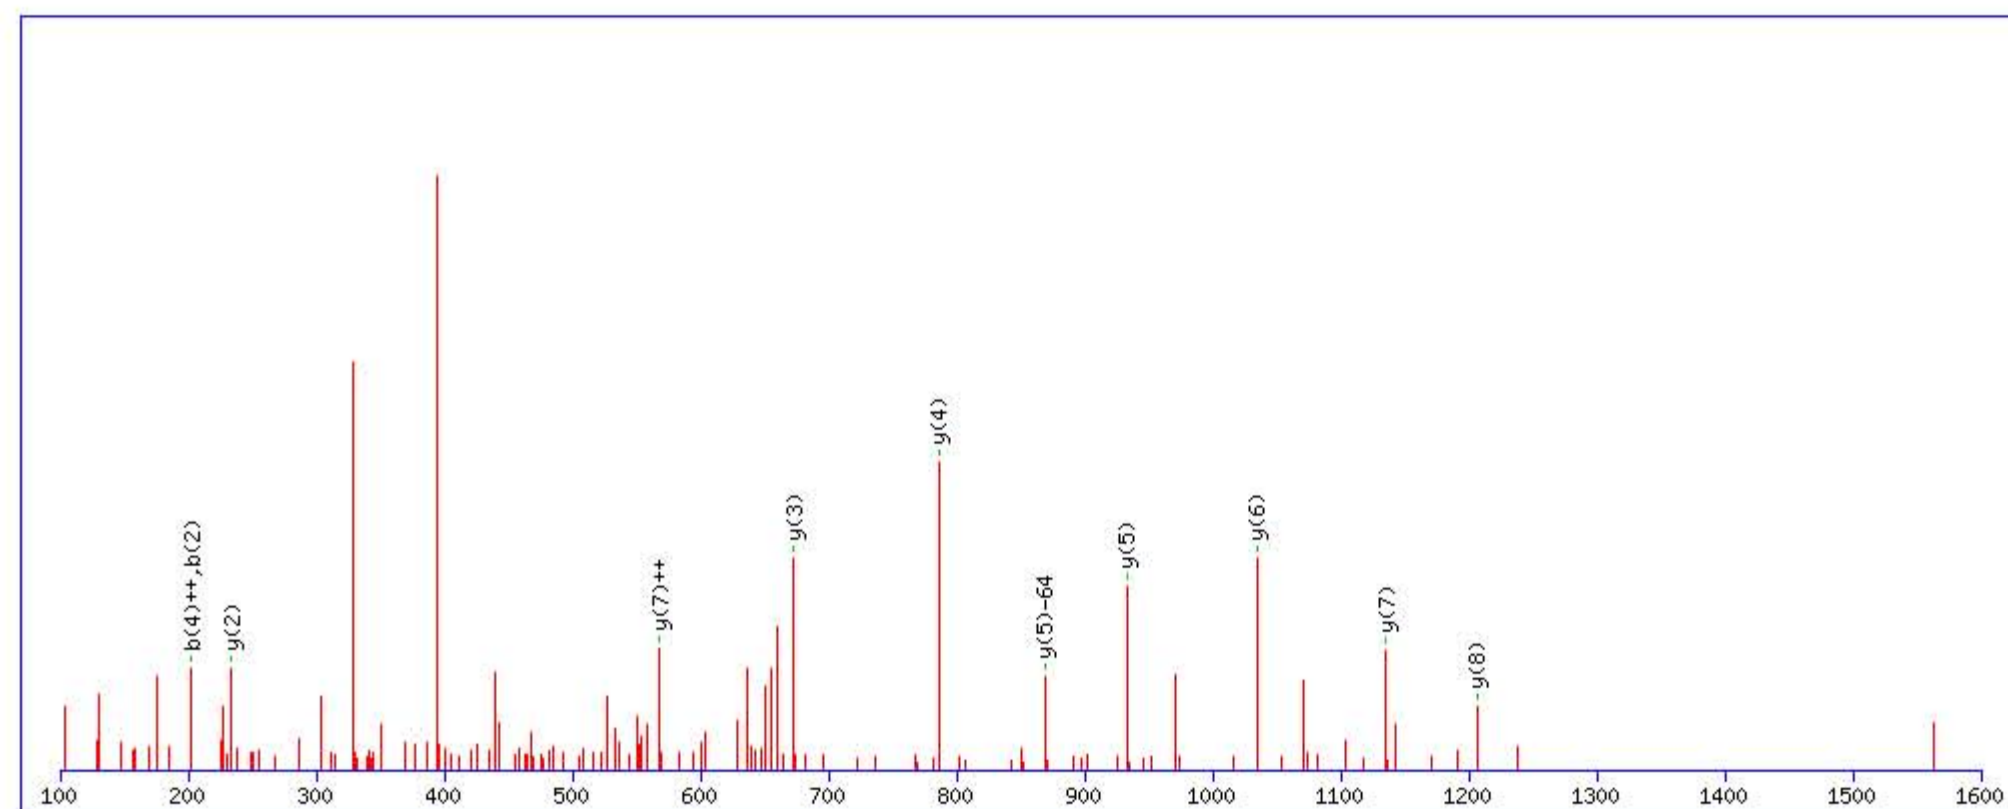

Monoisotopic mass of neutral peptide Mr(calc): 1336.655289

Fixed modifications: Carbamidomethyl (C) (apply to specified residues or termini only)

Variable modifications:

M5 : Oxidation (M), with neutral losses 0.000000 (shown in table), 63.998285

Q7 : Biotin:Thermo-21345 (Q)

Ions Score: 60 Expect: 1.5e-005

Matches : 11/122 fragment ions using 12 most intense peaks [\(help\)](#)

| # | b                 | b <sup>++</sup>   | b <sup>*</sup> | b <sup>*++</sup> | b <sup>0</sup> | b <sup>0++</sup> | Seq. | y                  | y <sup>++</sup>   | y <sup>*</sup> | y <sup>*++</sup> | y <sup>0</sup> | y <sup>0++</sup> | # |
|---|-------------------|-------------------|----------------|------------------|----------------|------------------|------|--------------------|-------------------|----------------|------------------|----------------|------------------|---|
| 1 | 132.047761        | 66.527518         |                |                  |                |                  | M    |                    |                   |                |                  |                |                  | 9 |
| 2 | <b>203.084875</b> | 102.046075        |                |                  |                |                  | A    | <b>1206.622094</b> | 603.814685        | 1189.595545    | 595.301411       | 1188.611529    | 594.809403       | 8 |
| 3 | 304.132554        | 152.569915        |                |                  | 286.121989     | 143.564632       | T    | <b>1135.584980</b> | <b>568.296128</b> | 1118.558431    | 559.782854       | 1117.574415    | 559.290846       | 7 |
| 4 | 405.180233        | <b>203.093754</b> |                |                  | 387.169668     | 194.088472       | T    | <b>1034.537301</b> | 517.772289        | 1017.510752    | 509.259014       | 1016.526736    | 508.767006       | 6 |
| 5 | 552.215633        | 276.611455        |                |                  | 534.205068     | 267.606172       | M    | <b>933.489622</b>  | 467.248449        | 916.463073     | 458.735175       | 915.479057     | 458.243167       | 5 |
| 6 | 665.299697        | 333.153487        |                |                  | 647.289132     | 324.148204       | I    | <b>786.454222</b>  | 393.730749        | 769.427673     | 385.217475       | 768.443657     | 384.725467       | 4 |
| 7 | 1104.525023       | 552.766149        | 1087.498474    | 544.252875       | 1086.514458    | 543.760867       | Q    | <b>673.370158</b>  | 337.188717        | 656.343609     | 328.675443       | 655.359593     | 328.183435       | 3 |
| 8 | 1191.557051       | 596.282164        | 1174.530502    | 587.768889       | 1173.546486    | 587.276881       | S    | <b>234.144832</b>  | 117.576054        | 217.118283     | 109.062780       | 216.134267     | 108.570772       | 2 |
| 9 |                   |                   |                |                  |                |                  | K    | 147.112804         | 74.060040         | 130.086255     | 65.546765        |                |                  | 1 |

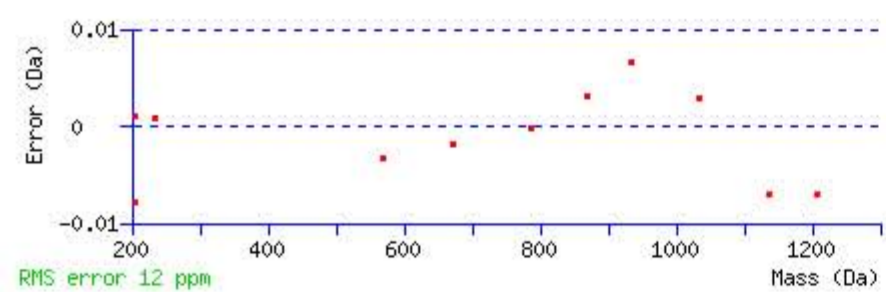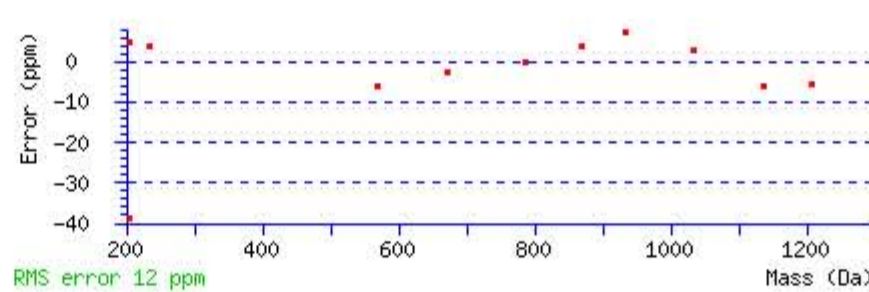

NCBI BLAST search of [MATTMIQSK](#)

(Parameters: blastp, nr protein database, expect=20000, no filter, PAM30)

Other BLAST [web gateways](#)

All matches to this query

| Score | Mr(calc):   | Delta     | Sequence                      |
|-------|-------------|-----------|-------------------------------|
| 59.8  | 1336.655289 | -0.002341 | <a href="#">MATTMIQSK</a>     |
| 9.5   | 1336.647018 | 0.005930  | <a href="#">SDSELVSKSTER</a>  |
| 5.6   | 1336.662247 | -0.009299 | <a href="#">KAEELQATYER</a>   |
| 3.8   | 1336.662308 | -0.009360 | <a href="#">KDTWGVVSSGSSK</a> |
| 1.5   | 1336.655289 | -0.002341 | <a href="#">MATTMIQSK</a>     |

# MASCOT Search Results

## Peptide View

MS/MS Fragmentation of **LSNENHGIAQR**

Found in **ITIH2\_HUMAN**, Inter-alpha-trypsin inhibitor heavy chain H2 OS=Homo sapiens GN=ITIH2 PE=1 SV=2

Match to Query 28465: 1548.775782 from(517.265870,3+) rtinseconds(1451) index(42582)

Title: Locus:1.1.1.3218.11 File:"2013-07-02 CLN FXIII 180 min 3rd F 4.wiff"

Data file C:\Program Files (x86)\Matrix Science\Mascot Daemon\mgf9 FXIII 180 min 3rd\mascot\_daemon\_merge.mgf

Click mouse within plot area to zoom in by factor of two about that point

Or, Plot from  to  Da

Label all possible matches  Label matches used for scoring

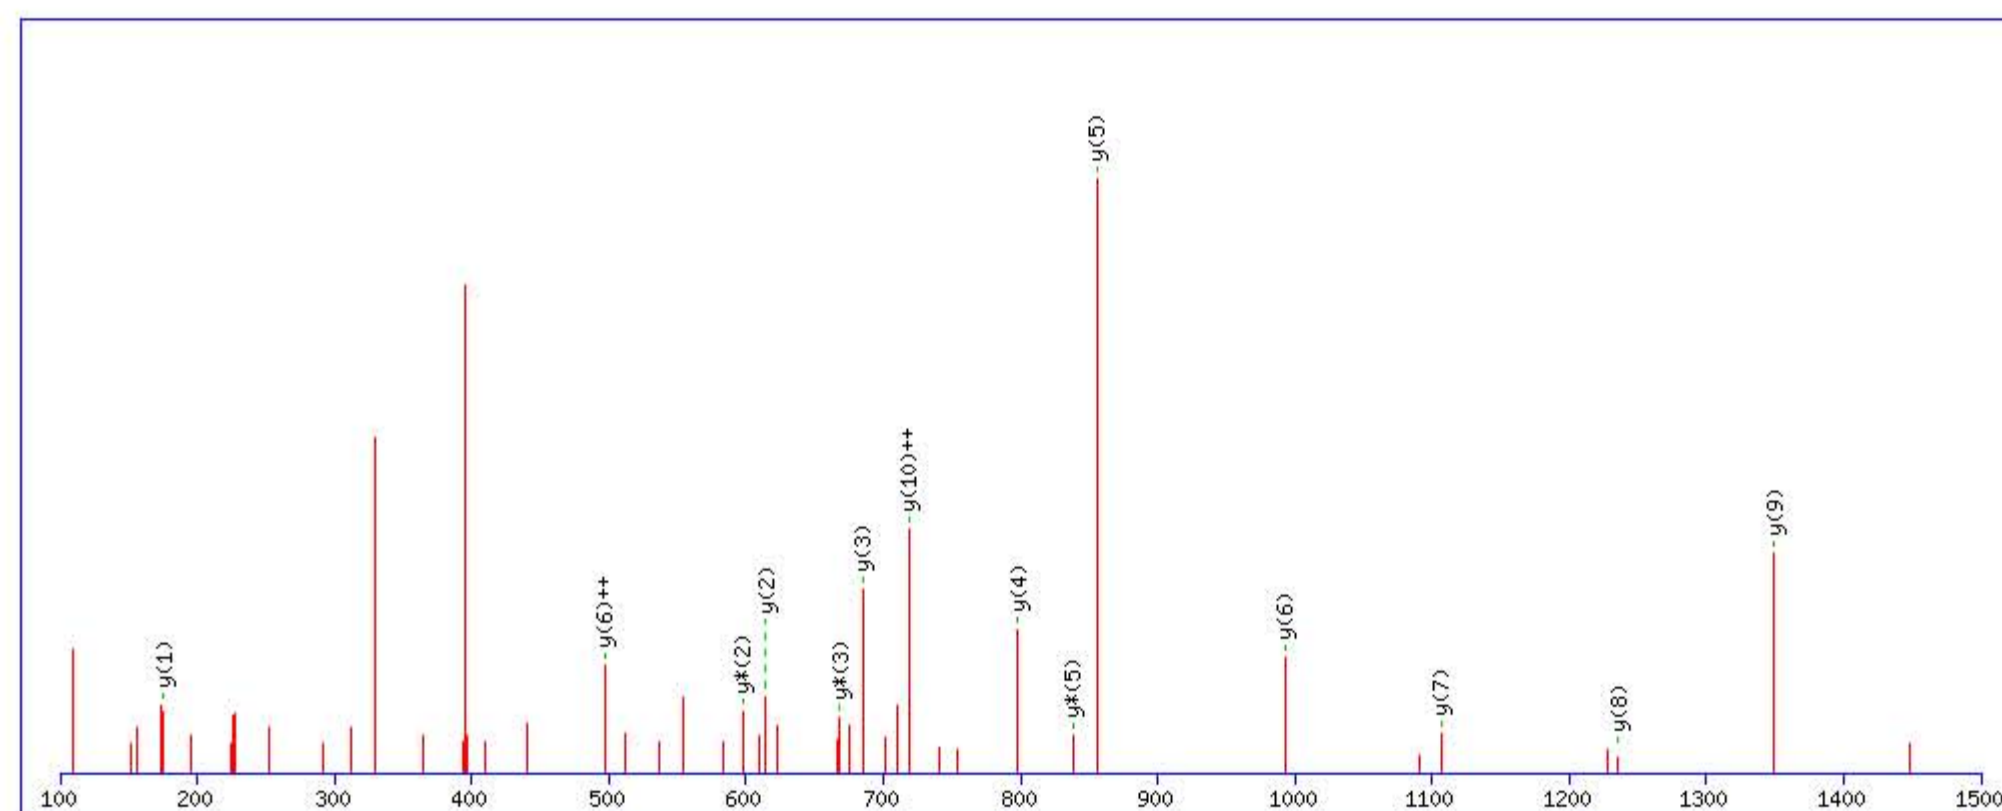

Monoisotopic mass of neutral peptide Mr(calc): 1548.783066

Fixed modifications: Carbamidomethyl (C) (apply to specified residues or termini only)

Variable modifications:

Q10 : Biotin:Thermo-21345 (Q)

Ions Score: 52 Expect: 2.5e-005

Matches : 14/100 fragment ions using 31 most intense peaks [\(help\)](#)

| #  | b           | b <sup>++</sup> | b <sup>+</sup> | b <sup>*++</sup> | b <sup>0</sup> | b <sup>0++</sup> | Seq. | y           | y <sup>++</sup> | y <sup>+</sup> | y <sup>*++</sup> | y <sup>0</sup> | y <sup>0++</sup> | #  |
|----|-------------|-----------------|----------------|------------------|----------------|------------------|------|-------------|-----------------|----------------|------------------|----------------|------------------|----|
| 1  | 114.091340  | 57.549308       |                |                  |                |                  | L    |             |                 |                |                  |                |                  | 11 |
| 2  | 201.123368  | 101.065322      |                |                  | 183.112803     | 92.060039        | S    | 1436.706307 | 718.856792      | 1419.679758    | 710.343517       | 1418.695742    | 709.851509       | 10 |
| 3  | 315.166295  | 158.086785      | 298.139746     | 149.573511       | 297.155730     | 149.081503       | N    | 1349.674279 | 675.340778      | 1332.647730    | 666.827503       | 1331.663714    | 666.335495       | 9  |
| 4  | 444.208888  | 222.608082      | 427.182339     | 214.094808       | 426.198323     | 213.602800       | E    | 1235.631352 | 618.319314      | 1218.604803    | 609.806040       | 1217.620787    | 609.314032       | 8  |
| 5  | 558.251815  | 279.629546      | 541.225266     | 271.116271       | 540.241250     | 270.624263       | N    | 1106.588759 | 553.798018      | 1089.562210    | 545.284743       |                |                  | 7  |
| 6  | 695.310727  | 348.159002      | 678.284178     | 339.645727       | 677.300162     | 339.153719       | H    | 992.545832  | 496.776554      | 975.519283     | 488.263280       |                |                  | 6  |
| 7  | 752.332191  | 376.669734      | 735.305642     | 368.156459       | 734.321626     | 367.664451       | G    | 855.486920  | 428.247098      | 838.460371     | 419.733824       |                |                  | 5  |
| 8  | 865.416255  | 433.211766      | 848.389706     | 424.698491       | 847.405690     | 424.206483       | I    | 798.465456  | 399.736366      | 781.438907     | 391.223092       |                |                  | 4  |
| 9  | 936.453369  | 468.730323      | 919.426820     | 460.217048       | 918.442804     | 459.725040       | A    | 685.381392  | 343.194334      | 668.354843     | 334.681060       |                |                  | 3  |
| 10 | 1375.678695 | 688.342986      | 1358.652146    | 679.829711       | 1357.668130    | 679.337703       | Q    | 614.344278  | 307.675777      | 597.317729     | 299.162503       |                |                  | 2  |
| 11 |             |                 |                |                  |                |                  | R    | 175.118952  | 88.063114       | 158.092403     | 79.549839        |                |                  | 1  |

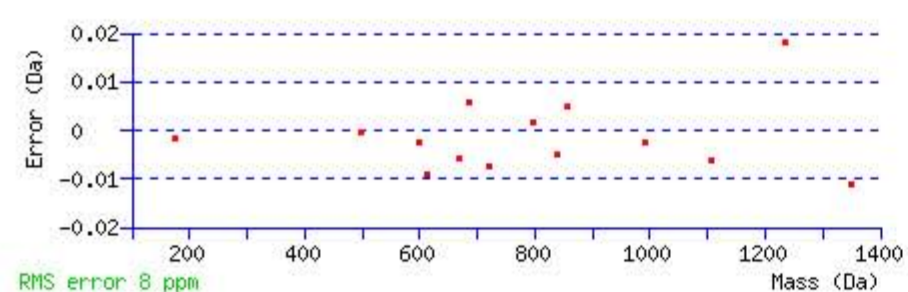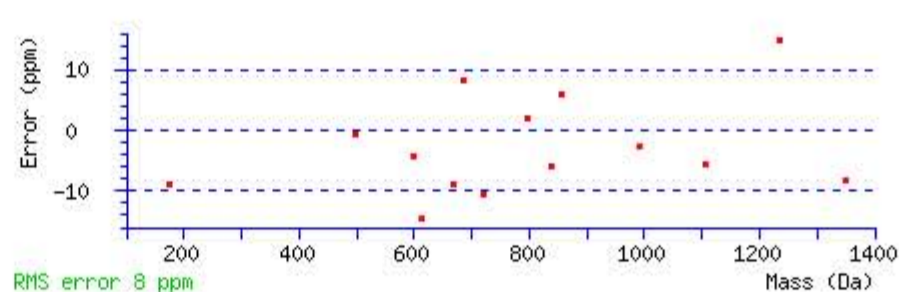

NCBI BLAST search of **LSNENHGIAQR**

(Parameters: blastp, nr protein database, expect=20000, no filter, PAM30)

Other BLAST [web gateways](#)

All matches to this query

| Score | Mr(calc):   | Delta     | Sequence                      |
|-------|-------------|-----------|-------------------------------|
| 52.2  | 1548.783066 | -0.007284 | <a href="#">LSNENHGIAQR</a>   |
| 3.1   | 1548.798340 | -0.022558 | <a href="#">LSALRCGHLFGYR</a> |

Mascot: <http://www.matrixscience.com/>

# MASCOT Search Results

## Peptide View

MS/MS Fragmentation of **FYNQVSTPLLR**

Found in **ITIH2\_HUMAN**, Inter-alpha-trypsin inhibitor heavy chain H2 OS=Homo sapiens GN=ITIH2 PE=1 SV=2

Match to Query 32647: 1647.873668 from(824.944110,2+) rtinseconds(2300) index(33613)

Title: Locus:1.1.1.3464.13 File:"2013-07-02 CLN FXIII 180 min 3rd F 3.wiff"

Data file C:\Program Files (x86)\Matrix Science\Mascot Daemon\mgf9 FXIII 180 min 3rd\mascot\_daemon\_merge.mgf

Click mouse within plot area to zoom in by factor of two about that point

Or, Plot from  to  Da

Label all possible matches  Label matches used for scoring

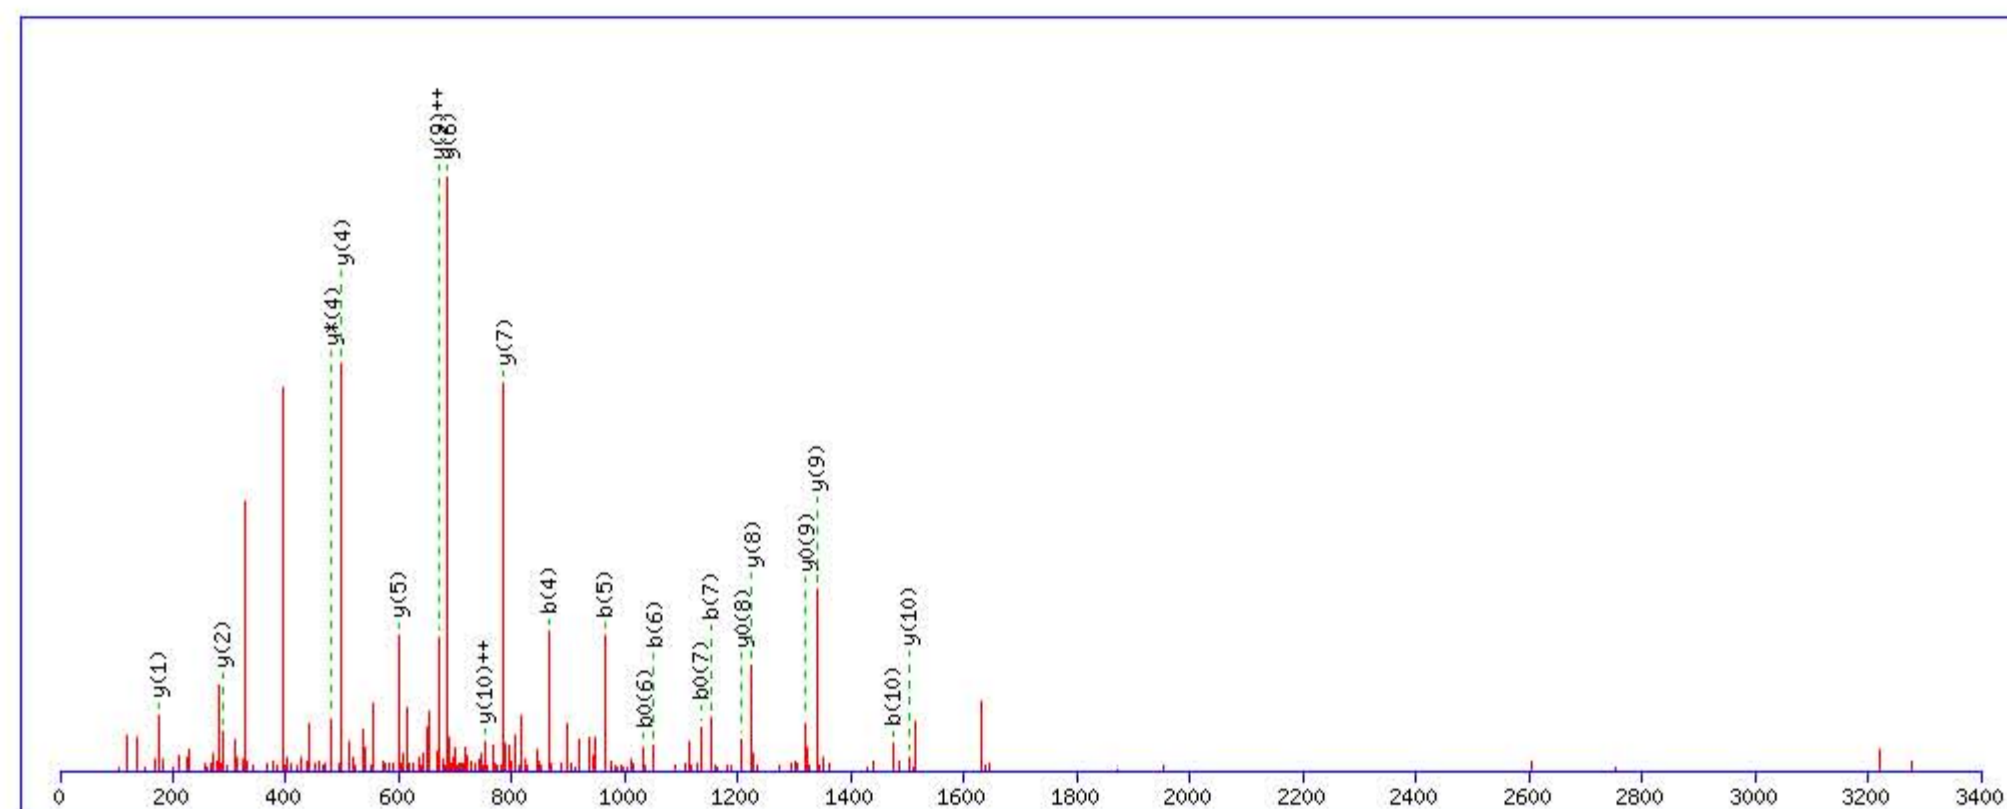

Monoisotopic mass of neutral peptide Mr(calc): 1647.880676

Fixed modifications: Carbamidomethyl (C) (apply to specified residues or termini only)

Variable modifications:

Q4 : Biotin:Thermo-21345 (Q)

Ions Score: 68 Expect: 3.2e-006

Matches : 21/98 fragment ions using 32 most intense peaks [\(help\)](#)

| #  | b           | b <sup>++</sup> | b <sup>*</sup> | b <sup>*++</sup> | b <sup>0</sup> | b <sup>0++</sup> | Seq. | y           | y <sup>++</sup> | y <sup>*</sup> | y <sup>*++</sup> | y <sup>0</sup> | y <sup>0++</sup> | #  |
|----|-------------|-----------------|----------------|------------------|----------------|------------------|------|-------------|-----------------|----------------|------------------|----------------|------------------|----|
| 1  | 148.075690  | 74.541483       |                |                  |                |                  | F    |             |                 |                |                  |                |                  | 11 |
| 2  | 311.139019  | 156.073148      |                |                  |                |                  | Y    | 1501.819547 | 751.413411      | 1484.792998    | 742.900137       | 1483.808982    | 742.408129       | 10 |
| 3  | 425.181946  | 213.094611      | 408.155397     | 204.581337       |                |                  | N    | 1338.756218 | 669.881747      | 1321.729669    | 661.368472       | 1320.745653    | 660.876464       | 9  |
| 4  | 864.407272  | 432.707274      | 847.380723     | 424.194000       |                |                  | Q    | 1224.713291 | 612.860283      | 1207.686742    | 604.347009       | 1206.702726    | 603.855001       | 8  |
| 5  | 963.475686  | 482.241481      | 946.449137     | 473.728207       |                |                  | V    | 785.487965  | 393.247620      | 768.461416     | 384.734346       | 767.477400     | 384.242338       | 7  |
| 6  | 1050.507714 | 525.757495      | 1033.481165    | 517.244221       | 1032.497149    | 516.752213       | S    | 686.419551  | 343.713414      | 669.393002     | 335.200139       | 668.408986     | 334.708131       | 6  |
| 7  | 1151.555393 | 576.281335      | 1134.528844    | 567.768060       | 1133.544828    | 567.276052       | T    | 599.387523  | 300.197399      | 582.360974     | 291.684125       | 581.376958     | 291.192117       | 5  |
| 8  | 1248.608157 | 624.807717      | 1231.581608    | 616.294442       | 1230.597592    | 615.802434       | P    | 498.339844  | 249.673560      | 481.313295     | 241.160285       |                |                  | 4  |
| 9  | 1361.692221 | 681.349749      | 1344.665672    | 672.836474       | 1343.681656    | 672.344466       | L    | 401.287080  | 201.147178      | 384.260531     | 192.633903       |                |                  | 3  |
| 10 | 1474.776285 | 737.891780      | 1457.749736    | 729.378506       | 1456.765720    | 728.886498       | L    | 288.203016  | 144.605146      | 271.176467     | 136.091871       |                |                  | 2  |
| 11 |             |                 |                |                  |                |                  | R    | 175.118952  | 88.063114       | 158.092403     | 79.549839        |                |                  | 1  |

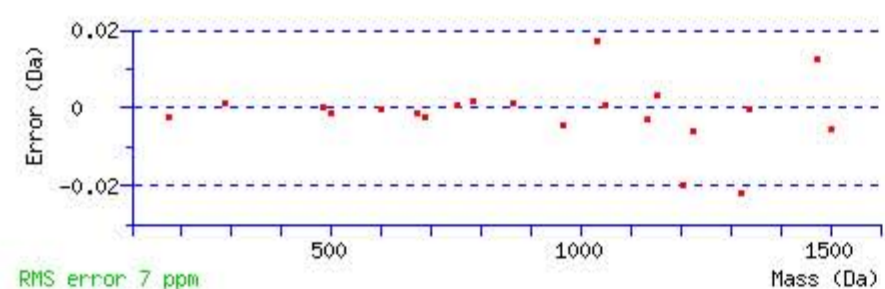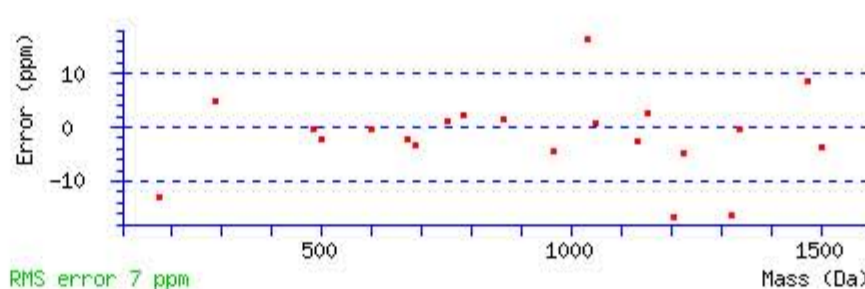

NCBI BLAST search of **FYNQVSTPLLR**

(Parameters: blastp, nr protein database, expect=20000, no filter, PAM30)

Other BLAST [web gateways](#)

All matches to this query

| Score | Mr(calc):   | Delta     | Sequence                       |
|-------|-------------|-----------|--------------------------------|
| 67.8  | 1647.880676 | -0.007008 | <a href="#">FYNQVSTPLLR</a>    |
| 8.7   | 1647.873260 | 0.000408  | <a href="#">AFKELPVNAQNYVR</a> |
| 6.1   | 1647.895264 | -0.021596 | <a href="#">MKPILLQGHHER</a>   |
| 4.5   | 1647.887878 | -0.014210 | <a href="#">TLNQQLTNHIR</a>    |
| 2.8   | 1647.887878 | -0.014210 | <a href="#">TLNQQLTNHIR</a>    |
| 1.6   | 1647.862015 | 0.011653  | <a href="#">LSKQHLEKYPDYK</a>  |
| 0.6   | 1647.894394 | -0.020726 | <a href="#">LSDNIQNVVLKSYR</a> |
| 0.0   | 1647.873260 | 0.000408  | <a href="#">RQWQSELLQKYGL</a>  |

# MASCOT Search Results

## Peptide View

MS/MS Fragmentation of **IYGNQDTSSQLK**

Found in **ITIH2\_HUMAN**, Inter-alpha-trypsin inhibitor heavy chain H2 OS=Homo sapiens GN=ITIH2 PE=1 SV=2

Match to Query 32956: 1663.819548 from(832.917050,2+) rtinseconds(1691) index(44094)

Title: Locus:1.1.1.3301.11 File:"2013-07-02 CLN FXIII 180 min 3rd F 4.wiff"

Data file C:\Program Files (x86)\Matrix Science\Mascot Daemon\mgf9 FXIII 180 min 3rd\mascot\_daemon\_merge.mgf

Click mouse within plot area to zoom in by factor of two about that point

Or, Plot from  to  Da

Label all possible matches  Label matches used for scoring

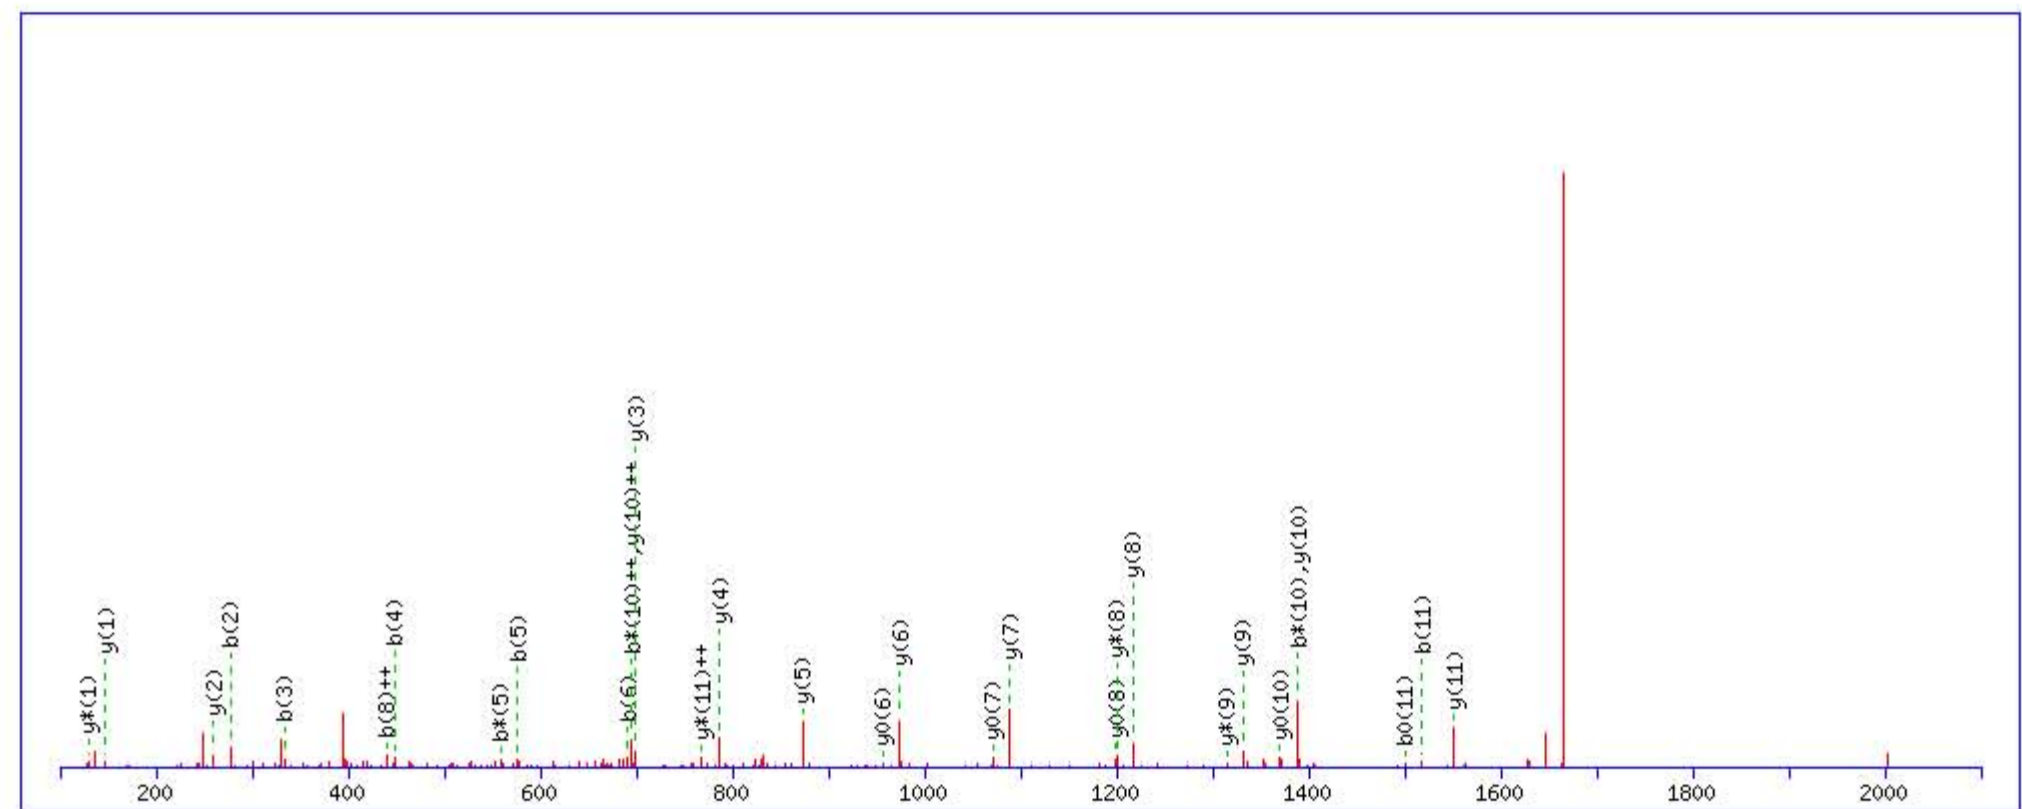

Monoisotopic mass of neutral peptide Mr(calc): 1663.823944

Fixed modifications: Carbamidomethyl (C) (apply to specified residues or termini only)

Variable modifications:

Q10 : Biotin:Thermo-21345 (Q)

Ions Score: 84 Expect: 7.2e-008

Matches : 31/110 fragment ions using 47 most intense peaks [\(help\)](#)

| #  | b                  | b <sup>++</sup>   | b <sup>*</sup>     | b <sup>*++</sup>  | b <sup>0</sup>     | b <sup>0++</sup> | Seq. | y                  | y <sup>++</sup>   | y <sup>*</sup>     | y <sup>*++</sup>  | y <sup>0</sup>     | y <sup>0++</sup> | #  |
|----|--------------------|-------------------|--------------------|-------------------|--------------------|------------------|------|--------------------|-------------------|--------------------|-------------------|--------------------|------------------|----|
| 1  | 114.091340         | 57.549308         |                    |                   |                    |                  | I    |                    |                   |                    |                   |                    |                  | 12 |
| 2  | <b>277.154669</b>  | 139.080973        |                    |                   |                    |                  | Y    | <b>1551.747170</b> | 776.377223        | 1534.720621        | <b>767.863948</b> | 1533.736605        | 767.371940       | 11 |
| 3  | <b>334.176133</b>  | 167.591704        |                    |                   |                    |                  | G    | <b>1388.683841</b> | <b>694.845558</b> | 1371.657292        | 686.332284        | <b>1370.673276</b> | 685.840276       | 10 |
| 4  | <b>448.219060</b>  | 224.613168        | 431.192511         | 216.099894        |                    |                  | N    | <b>1331.662377</b> | 666.334826        | <b>1314.635828</b> | 657.821552        | 1313.651812        | 657.329544       | 9  |
| 5  | <b>576.277638</b>  | 288.642457        | <b>559.251089</b>  | 280.129183        |                    |                  | Q    | <b>1217.619450</b> | 609.313363        | <b>1200.592901</b> | 600.800088        | <b>1199.608885</b> | 600.308080       | 8  |
| 6  | <b>691.304581</b>  | 346.155929        | 674.278032         | 337.642654        | 673.294016         | 337.150646       | D    | <b>1089.560872</b> | 545.284074        | 1072.534323        | 536.770799        | <b>1071.550307</b> | 536.278791       | 7  |
| 7  | 792.352260         | 396.679768        | 775.325711         | 388.166494        | 774.341695         | 387.674486       | T    | <b>974.533929</b>  | 487.770602        | 957.507380         | 479.257328        | <b>956.523364</b>  | 478.765320       | 6  |
| 8  | 879.384288         | <b>440.195782</b> | 862.357739         | 431.682507        | 861.373723         | 431.190499       | S    | <b>873.486250</b>  | 437.246763        | 856.459701         | 428.733488        | 855.475685         | 428.241480       | 5  |
| 9  | 966.416316         | 483.711796        | 949.389767         | 475.198521        | 948.405751         | 474.706513       | S    | <b>786.454222</b>  | 393.730749        | 769.427673         | 385.217474        | 768.443657         | 384.725466       | 4  |
| 10 | 1405.641642        | 703.324459        | <b>1388.615093</b> | <b>694.811184</b> | 1387.631077        | 694.319176       | Q    | <b>699.422194</b>  | 350.214735        | 682.395645         | 341.701460        |                    |                  | 3  |
| 11 | <b>1518.725706</b> | 759.866491        | 1501.699157        | 751.353216        | <b>1500.715141</b> | 750.861208       | L    | <b>260.196868</b>  | 130.602072        | 243.170319         | 122.088797        |                    |                  | 2  |
| 12 |                    |                   |                    |                   |                    |                  | K    | <b>147.112804</b>  | 74.060040         | <b>130.086255</b>  | 65.546765         |                    |                  | 1  |

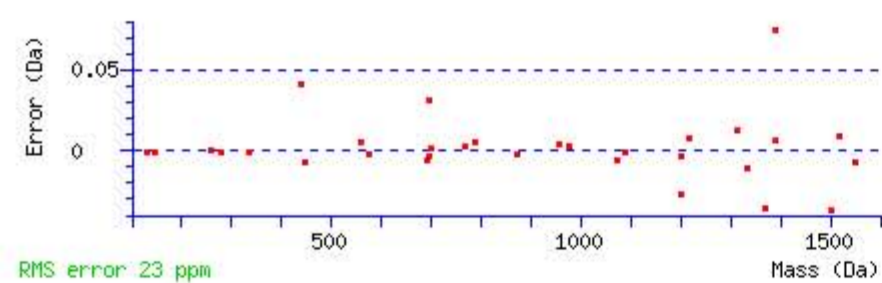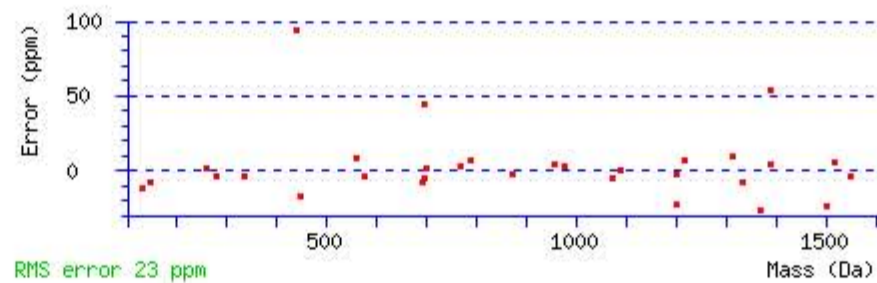

NCBI BLAST search of **IYGNQDTSSQLK**

(Parameters: blastp, nr protein database, expect=20000, no filter, PAM30)

Other BLAST [web gateways](#)

All matches to this query

| Score | Mr(calc):   | Delta     | Sequence                      |
|-------|-------------|-----------|-------------------------------|
| 83.5  | 1663.823944 | -0.004396 | <a href="#">IYGNQDTSSQLK</a>  |
| 20.4  | 1663.823944 | -0.004396 | <a href="#">IYGNQDTSSQLK</a>  |
| 7.0   | 1663.821442 | -0.001894 | <a href="#">LYGCFLRVYMQSK</a> |
| 3.1   | 1663.806183 | 0.013365  | <a href="#">DLSMFSQNMTHIK</a> |
| 2.1   | 1663.835175 | -0.015627 | <a href="#">DCSIKWSVESGRK</a> |
| 2.0   | 1663.831345 | -0.011797 | <a href="#">QLTDCISEFLK</a>   |

# MASCOT SEARCH RESULTS

## Peptide View

MS/MS Fragmentation of **AHVSFKPTVAQQR**

Found in **ITIH2\_HUMAN**, Inter-alpha-trypsin inhibitor heavy chain H2 OS=Homo sapiens GN=ITIH2 PE=1 SV=2

Match to Query 35306: 1778.956842 from(593.992890,3+) rtinseconds(1549) index(43194)

Title: Locus:1.1.1.3252.12 File:"2013-07-02 CLN FXIII 180 min 3rd F 4.wiff"

Data file C:\Program Files (x86)\Matrix Science\Mascot Daemon\mgf\9 FXIII 180 min 3rd\mascot\_daemon\_merge.mgf

Click mouse within plot area to zoom in by factor of two about that point

Or, Plot from  to  Da

Label all possible matches  Label matches used for scoring

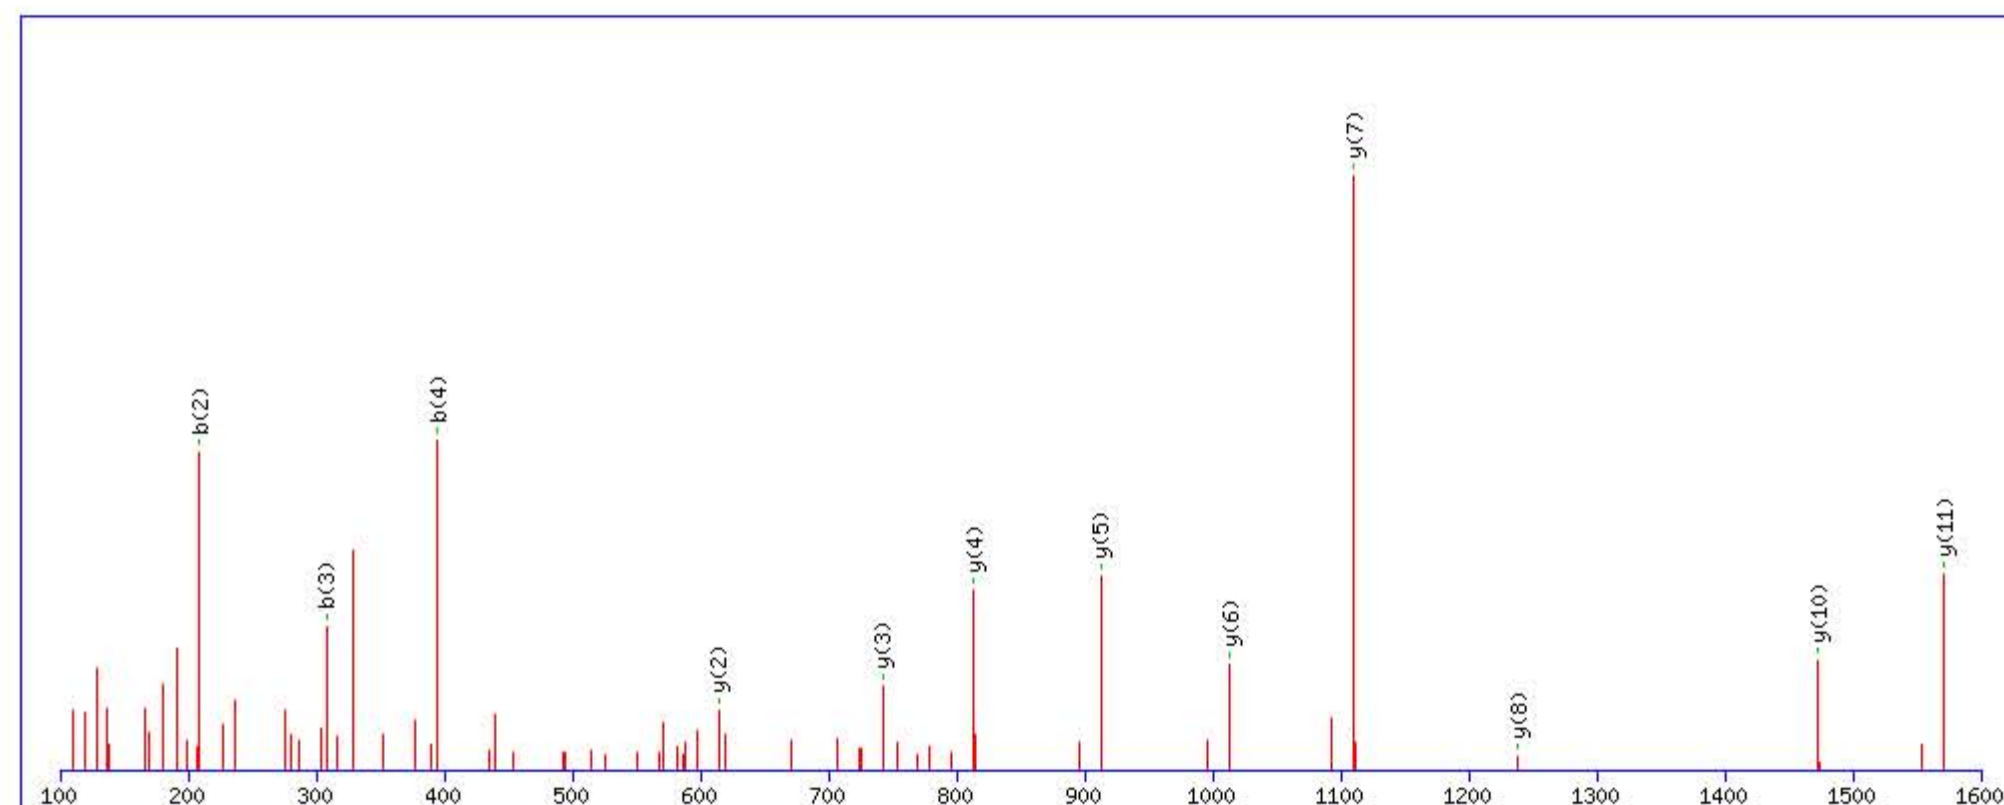

Monoisotopic mass of neutral peptide Mr(calc): 1778.961395

Fixed modifications: Carbamidomethyl (C) (apply to specified residues or termini only)

Variable modifications:

Q12 : Biotin:Thermo-21345 (Q)

Ions Score: 82 Expect: 1.4e-007

Matches : 12/118 fragment ions using 14 most intense peaks [\(help\)](#)

| #  | b                 | b <sup>++</sup> | b <sup>*</sup> | b <sup>*++</sup> | b <sup>0</sup> | b <sup>0++</sup> | Seq. | y                  | y <sup>++</sup> | y <sup>*</sup> | y <sup>*++</sup> | y <sup>0</sup> | y <sup>0++</sup> | #  |
|----|-------------------|-----------------|----------------|------------------|----------------|------------------|------|--------------------|-----------------|----------------|------------------|----------------|------------------|----|
| 1  | 72.044390         | 36.525833       |                |                  |                |                  | A    |                    |                 |                |                  |                |                  | 13 |
| 2  | <b>209.103302</b> | 105.055289      |                |                  |                |                  | H    | 1708.931558        | 854.969417      | 1691.905009    | 846.456143       | 1690.920993    | 845.964135       | 12 |
| 3  | <b>308.171716</b> | 154.589496      |                |                  |                |                  | V    | <b>1571.872646</b> | 786.439961      | 1554.846097    | 777.926687       | 1553.862081    | 777.434679       | 11 |
| 4  | <b>395.203744</b> | 198.105510      |                |                  | 377.193179     | 189.100227       | S    | <b>1472.804232</b> | 736.905754      | 1455.777683    | 728.392480       | 1454.793667    | 727.900472       | 10 |
| 5  | 542.272158        | 271.639717      |                |                  | 524.261593     | 262.634435       | F    | 1385.772204        | 693.389740      | 1368.745655    | 684.876466       | 1367.761639    | 684.384458       | 9  |
| 6  | 670.367121        | 335.687199      | 653.340572     | 327.173924       | 652.356556     | 326.681916       | K    | <b>1238.703790</b> | 619.855533      | 1221.677241    | 611.342259       | 1220.693225    | 610.850251       | 8  |
| 7  | 767.419885        | 384.213581      | 750.393336     | 375.700306       | 749.409320     | 375.208298       | P    | <b>1110.608827</b> | 555.808052      | 1093.582278    | 547.294777       | 1092.598262    | 546.802769       | 7  |
| 8  | 868.467564        | 434.737420      | 851.441015     | 426.224146       | 850.456999     | 425.732138       | T    | <b>1013.556063</b> | 507.281670      | 996.529514     | 498.768395       | 995.545498     | 498.276387       | 6  |
| 9  | 967.535978        | 484.271627      | 950.509429     | 475.758353       | 949.525413     | 475.266345       | V    | <b>912.508384</b>  | 456.757830      | 895.481835     | 448.244556       |                |                  | 5  |
| 10 | 1038.573092       | 519.790184      | 1021.546543    | 511.276910       | 1020.562527    | 510.784902       | A    | <b>813.439970</b>  | 407.223623      | 796.413421     | 398.710349       |                |                  | 4  |
| 11 | 1166.631670       | 583.819473      | 1149.605121    | 575.306199       | 1148.621105    | 574.814191       | Q    | <b>742.402856</b>  | 371.705066      | 725.376307     | 363.191792       |                |                  | 3  |
| 12 | 1605.856996       | 803.432136      | 1588.830447    | 794.918862       | 1587.846431    | 794.426854       | Q    | <b>614.344278</b>  | 307.675777      | 597.317729     | 299.162503       |                |                  | 2  |
| 13 |                   |                 |                |                  |                |                  | R    | 175.118952         | 88.063114       | 158.092403     | 79.549839        |                |                  | 1  |

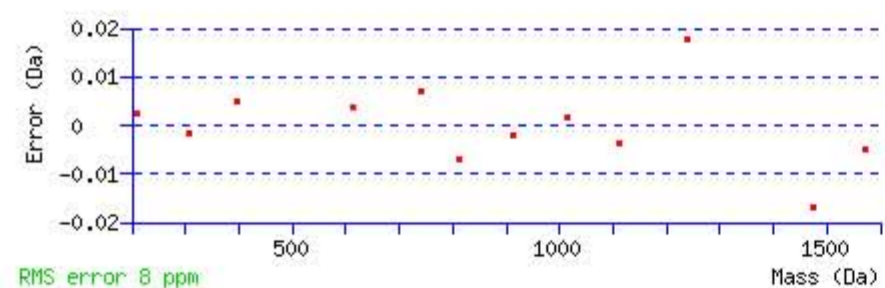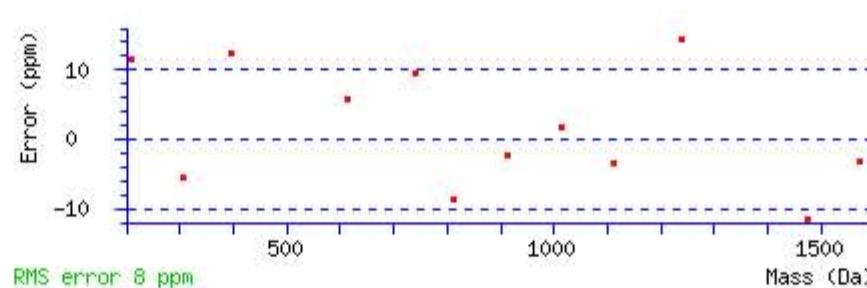

NCBI BLAST search of **AHVSFKPTVAQQR**

(Parameters: blastp, nr protein database, expect=20000, no filter, PAM30)

Other BLAST [web gateways](#)

All matches to this query

| Score | Mr(calc):   | Delta     | Sequence                      |
|-------|-------------|-----------|-------------------------------|
| 81.8  | 1778.961395 | -0.004553 | <a href="#">AHVSFKPTVAQQR</a> |
| 65.5  | 1778.961395 | -0.004553 | <a href="#">AHVSFKPTVAQQR</a> |

Mascot: <http://www.matrixscience.com/>

# MASCOT SEARCH RESULTS

## Peptide View

MS/MS Fragmentation of **AHVSFKPTVAQQR**

Found in **ITIH2\_HUMAN**, Inter-alpha-trypsin inhibitor heavy chain H2 OS=Homo sapiens GN=ITIH2 PE=1 SV=2

Match to Query 35307: 1778.956842 from(593.992890,3+) rtinseconds(1564) index(43268)

Title: Locus:1.1.1.3257.10 File:"2013-07-02 CLN FXIII 180 min 3rd F 4.wiff"

Data file C:\Program Files (x86)\Matrix Science\Mascot Daemon\mgf\9 FXIII 180 min 3rd\mascot\_daemon\_merge.mgf

Click mouse within plot area to zoom in by factor of two about that point

Or, Plot from  to  Da

Label all possible matches  Label matches used for scoring

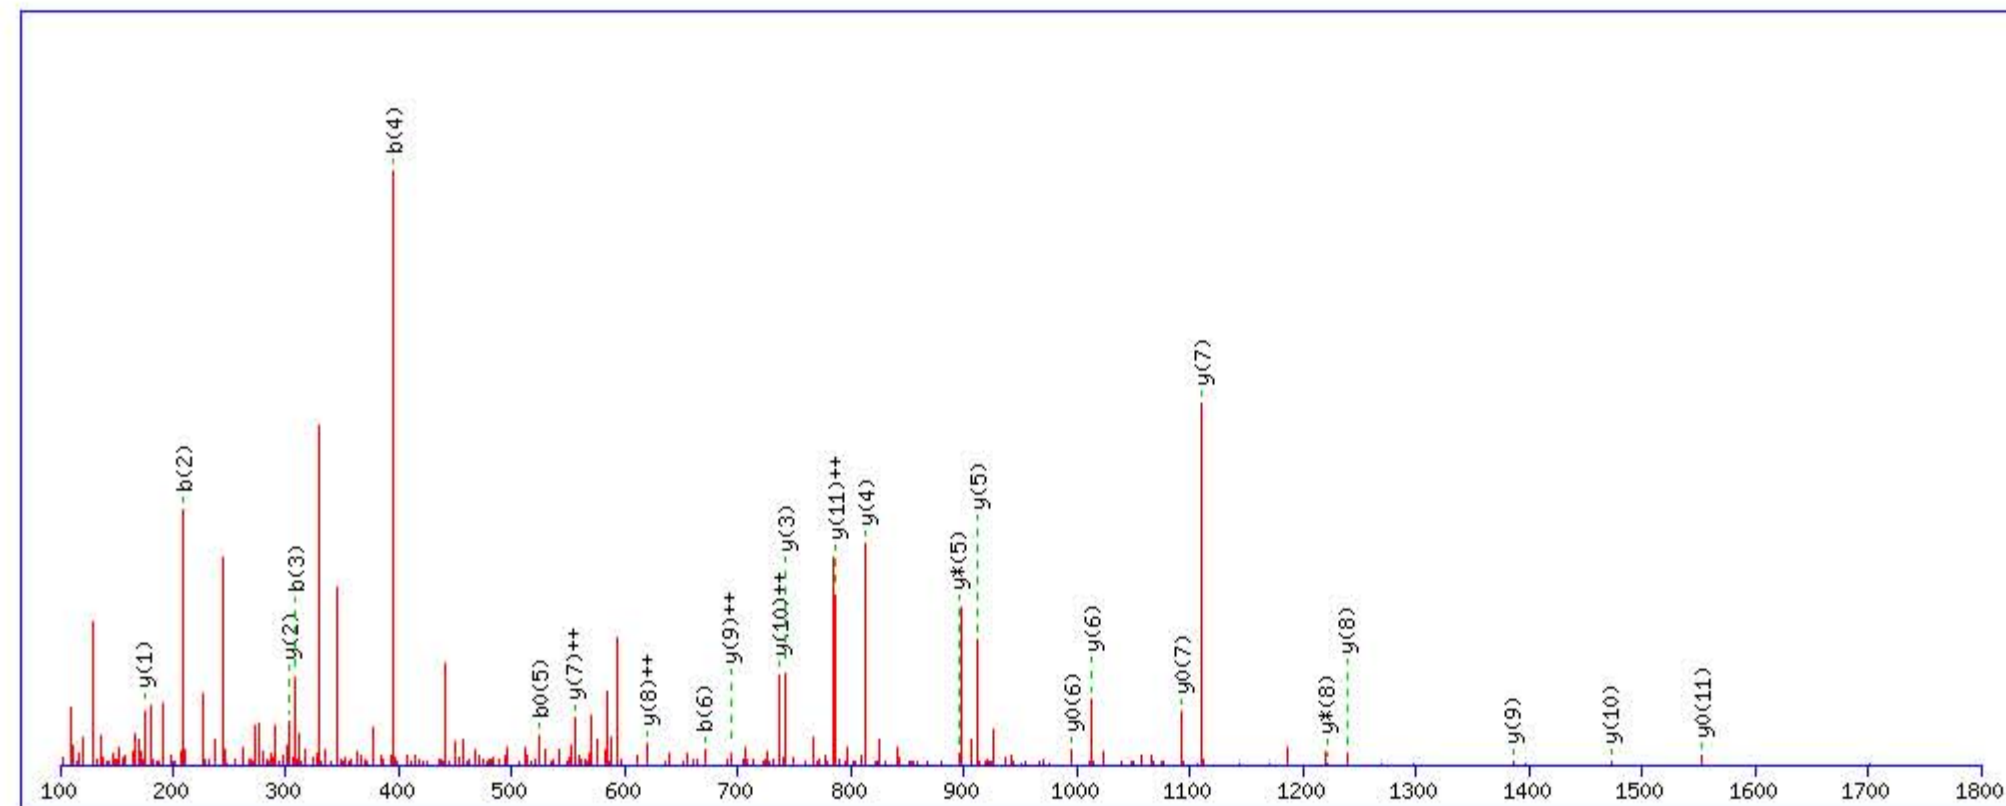

Monoisotopic mass of neutral peptide Mr(calc): 1778.961395

Fixed modifications: Carbamidomethyl (C) (apply to specified residues or termini only)

Variable modifications:

Q11 : Biotin:Thermo-21345 (Q)

Ions Score: 41 Expect: 0.00038

Matches : 25/118 fragment ions using 65 most intense peaks [\(help\)](#)

| #  | b                 | b <sup>++</sup> | b <sup>+</sup> | b <sup>+++</sup> | b <sup>0</sup>    | b <sup>0++</sup> | Seq. | y                  | y <sup>++</sup>   | y <sup>+</sup>     | y <sup>+++</sup> | y <sup>0</sup>     | y <sup>0++</sup> | #  |
|----|-------------------|-----------------|----------------|------------------|-------------------|------------------|------|--------------------|-------------------|--------------------|------------------|--------------------|------------------|----|
| 1  | 72.044390         | 36.525833       |                |                  |                   |                  | A    |                    |                   |                    |                  |                    |                  | 13 |
| 2  | <b>209.103302</b> | 105.055289      |                |                  |                   |                  | H    | 1708.931558        | 854.969417        | 1691.905009        | 846.456143       | 1690.920993        | 845.964135       | 12 |
| 3  | <b>308.171716</b> | 154.589496      |                |                  |                   |                  | V    | 1571.872646        | <b>786.439961</b> | 1554.846097        | 777.926687       | <b>1553.862081</b> | 777.434679       | 11 |
| 4  | <b>395.203744</b> | 198.105510      |                |                  | 377.193179        | 189.100227       | S    | <b>1472.804232</b> | <b>736.905754</b> | 1455.777683        | 728.392480       | 1454.793667        | 727.900472       | 10 |
| 5  | 542.272158        | 271.639717      |                |                  | <b>524.261593</b> | 262.634435       | F    | <b>1385.772204</b> | <b>693.389740</b> | 1368.745655        | 684.876466       | 1367.761639        | 684.384458       | 9  |
| 6  | <b>670.367121</b> | 335.687199      | 653.340572     | 327.173924       | 652.356556        | 326.681916       | K    | <b>1238.703790</b> | <b>619.855533</b> | <b>1221.677241</b> | 611.342259       | 1220.693225        | 610.850251       | 8  |
| 7  | 767.419885        | 384.213581      | 750.393336     | 375.700306       | 749.409320        | 375.208298       | P    | <b>1110.608827</b> | <b>555.808052</b> | 1093.582278        | 547.294777       | <b>1092.598262</b> | 546.802769       | 7  |
| 8  | 868.467564        | 434.737420      | 851.441015     | 426.224146       | 850.456999        | 425.732138       | T    | <b>1013.556063</b> | 507.281670        | 996.529514         | 498.768395       | <b>995.545498</b>  | 498.276387       | 6  |
| 9  | 967.535978        | 484.271627      | 950.509429     | 475.758353       | 949.525413        | 475.266345       | V    | <b>912.508384</b>  | 456.757830        | <b>895.481835</b>  | 448.244556       |                    |                  | 5  |
| 10 | 1038.573092       | 519.790184      | 1021.546543    | 511.276910       | 1020.562527       | 510.784902       | A    | <b>813.439970</b>  | 407.223623        | 796.413421         | 398.710349       |                    |                  | 4  |
| 11 | 1477.798418       | 739.402847      | 1460.771869    | 730.889573       | 1459.787853       | 730.397565       | Q    | <b>742.402856</b>  | 371.705066        | 725.376307         | 363.191792       |                    |                  | 3  |
| 12 | 1605.856996       | 803.432136      | 1588.830447    | 794.918862       | 1587.846431       | 794.426854       | Q    | <b>303.177530</b>  | 152.092403        | 286.150981         | 143.579129       |                    |                  | 2  |
| 13 |                   |                 |                |                  |                   |                  | R    | <b>175.118952</b>  | 88.063114         | 158.092403         | 79.549839        |                    |                  | 1  |

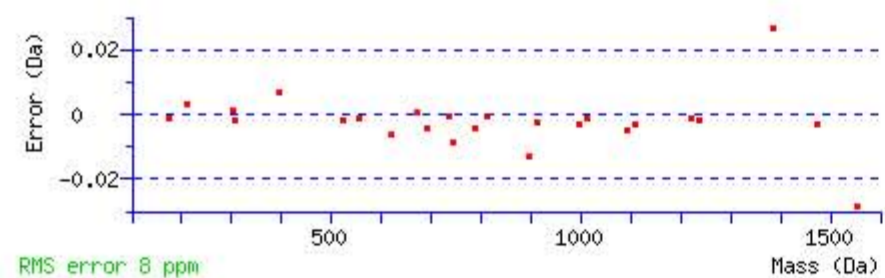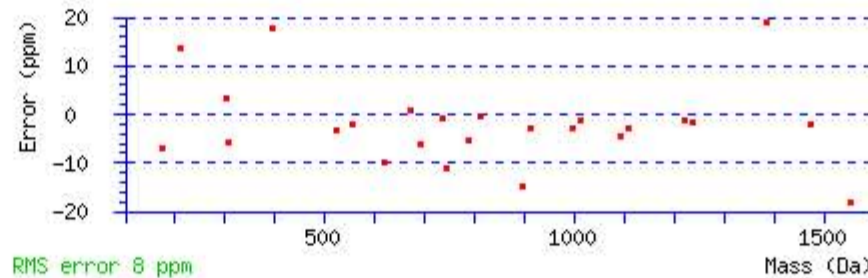

NCBI BLAST search of **AHVSFKPTVAQQR**

(Parameters: blastp, nr protein database, expect=20000, no filter, PAM30)

Other BLAST [web gateways](#)

All matches to this query

| Score | Mr(calc):   | Delta     | Sequence                         |
|-------|-------------|-----------|----------------------------------|
| 40.9  | 1778.961395 | -0.004553 | <a href="#">AHVSFKPTVAQQR</a>    |
| 32.2  | 1778.961395 | -0.004553 | <a href="#">AHVSFKPTVAQQR</a>    |
| 4.3   | 1778.982498 | -0.025656 | <a href="#">SRDAKLVLLNMPGPPR</a> |

Mascot: <http://www.matrixscience.com/>

# MASCOT SEARCH RESULTS

## Peptide View

MS/MS Fragmentation of **IYGNQDTSSQLK**

Found in **ITIH2\_HUMAN**, Inter-alpha-trypsin inhibitor heavy chain H2 OS=Homo sapiens GN=ITIH2 PE=1 SV=2

Match to Query 38876: 1974.993372 from(659.338400,3+) rtinseconds(2012) index(46169)

Title: Locus:1.1.1.3413.5 File:"2013-07-02 CLN FXIII 180 min 3rd F 4.wiff"

Data file C:\Program Files (x86)\Matrix Science\Mascot Daemon\mgf\9 FXIII 180 min 3rd\mascot\_daemon\_merge.mgf

Click mouse within plot area to zoom in by factor of two about that point

Or, Plot from  to  Da

Label all possible matches  Label matches used for scoring

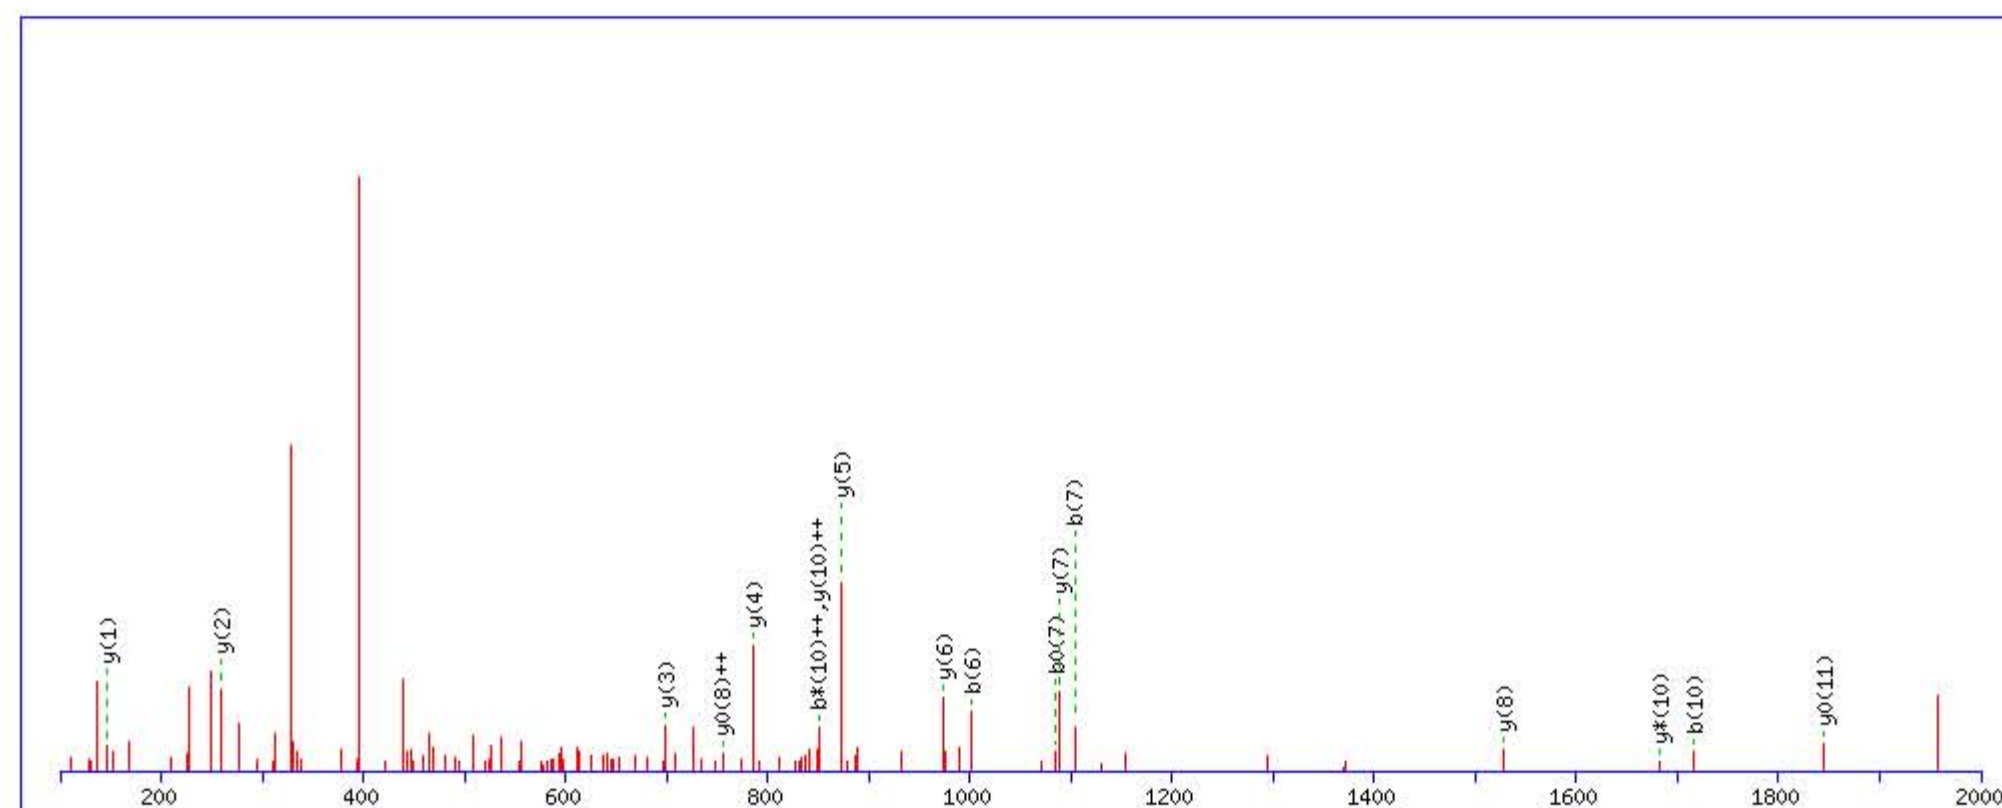

Monoisotopic mass of neutral peptide Mr(calc): 1974.990692

Fixed modifications: Carbamidomethyl (C) (apply to specified residues or termini only)

Variable modifications:

Q5 : Biotin:Thermo-21345 (Q)

Q10 : Biotin:Thermo-21345 (Q)

Ions Score: 31 Expect: 0.02

Matches : 17/110 fragment ions using 40 most intense peaks [\(help\)](#)

| #  | b           | b <sup>++</sup> | b <sup>*</sup> | b <sup>*++</sup> | b <sup>0</sup> | b <sup>0++</sup> | Seq. | y           | y <sup>++</sup> | y <sup>*</sup> | y <sup>*++</sup> | y <sup>0</sup> | y <sup>0++</sup> | #  |
|----|-------------|-----------------|----------------|------------------|----------------|------------------|------|-------------|-----------------|----------------|------------------|----------------|------------------|----|
| 1  | 114.091340  | 57.549308       |                |                  |                |                  | I    |             |                 |                |                  |                |                  | 12 |
| 2  | 277.154669  | 139.080973      |                |                  |                |                  | Y    | 1862.913918 | 931.960597      | 1845.887369    | 923.447323       | 1844.903353    | 922.955315       | 11 |
| 3  | 334.176133  | 167.591704      |                |                  |                |                  | G    | 1699.850589 | 850.428933      | 1682.824040    | 841.915658       | 1681.840024    | 841.423650       | 10 |
| 4  | 448.219060  | 224.613168      | 431.192511     | 216.099894       |                |                  | N    | 1642.829125 | 821.918201      | 1625.802576    | 813.404926       | 1624.818560    | 812.912918       | 9  |
| 5  | 887.444386  | 444.225831      | 870.417837     | 435.712557       |                |                  | Q    | 1528.786198 | 764.896737      | 1511.759649    | 756.383463       | 1510.775633    | 755.891455       | 8  |
| 6  | 1002.471329 | 501.739303      | 985.444780     | 493.226028       | 984.460764     | 492.734020       | D    | 1089.560872 | 545.284074      | 1072.534323    | 536.770800       | 1071.550307    | 536.278792       | 7  |
| 7  | 1103.519008 | 552.263142      | 1086.492459    | 543.749868       | 1085.508443    | 543.257860       | T    | 974.533929  | 487.770603      | 957.507380     | 479.257328       | 956.523364     | 478.765320       | 6  |
| 8  | 1190.551036 | 595.779156      | 1173.524487    | 587.265882       | 1172.540471    | 586.773874       | S    | 873.486250  | 437.246763      | 856.459701     | 428.733489       | 855.475685     | 428.241481       | 5  |
| 9  | 1277.583064 | 639.295170      | 1260.556515    | 630.781896       | 1259.572499    | 630.289888       | S    | 786.454222  | 393.730749      | 769.427673     | 385.217475       | 768.443657     | 384.725467       | 4  |
| 10 | 1716.808390 | 858.907833      | 1699.781841    | 850.394559       | 1698.797825    | 849.902551       | Q    | 699.422194  | 350.214735      | 682.395645     | 341.701461       |                |                  | 3  |
| 11 | 1829.892454 | 915.449865      | 1812.865905    | 906.936591       | 1811.881889    | 906.444583       | L    | 260.196868  | 130.602072      | 243.170319     | 122.088797       |                |                  | 2  |
| 12 |             |                 |                |                  |                |                  | K    | 147.112804  | 74.060040       | 130.086255     | 65.546765        |                |                  | 1  |

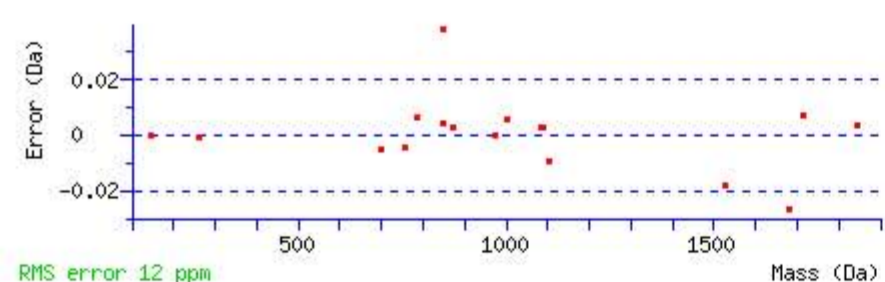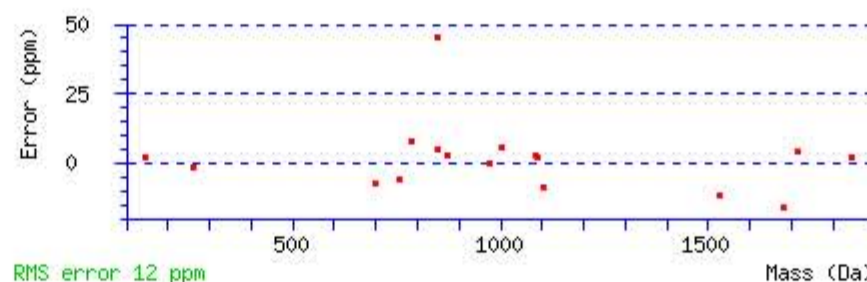

NCBI BLAST search of **IYGNQDTSSQLK**

(Parameters: blastp, nr protein database, expect=20000, no filter, PAM30)

Other BLAST [web gateways](#)

All matches to this query

| Score | Mr(calc):   | Delta    | Sequence                     |
|-------|-------------|----------|------------------------------|
| 31.1  | 1974.990692 | 0.002680 | <a href="#">IYGNQDTSSQLK</a> |

Mascot: <http://www.matrixscience.com/>



# MASCOT SEARCH RESULTS

## Peptide View

MS/MS Fragmentation of **AHVSFKPTVAQQR**

Found in **ITIH2\_HUMAN**, Inter-alpha-trypsin inhibitor heavy chain H2 OS=Homo sapiens GN=ITIH2 PE=1 SV=2

Match to Query 41448: 2090.128542 from(697.716790,3+) rtinseconds(1811) index(44829)

Title: Locus:1.1.1.3343.10 File:"2013-07-02 CLN FXIII 180 min 3rd F 4.wiff"

Data file C:\Program Files (x86)\Matrix Science\Mascot Daemon\mgf9 FXIII 180 min 3rd\mascot\_daemon\_merge.mgf

Click mouse within plot area to zoom in by factor of two about that point

Or, Plot from  to  Da

Label all possible matches  Label matches used for scoring

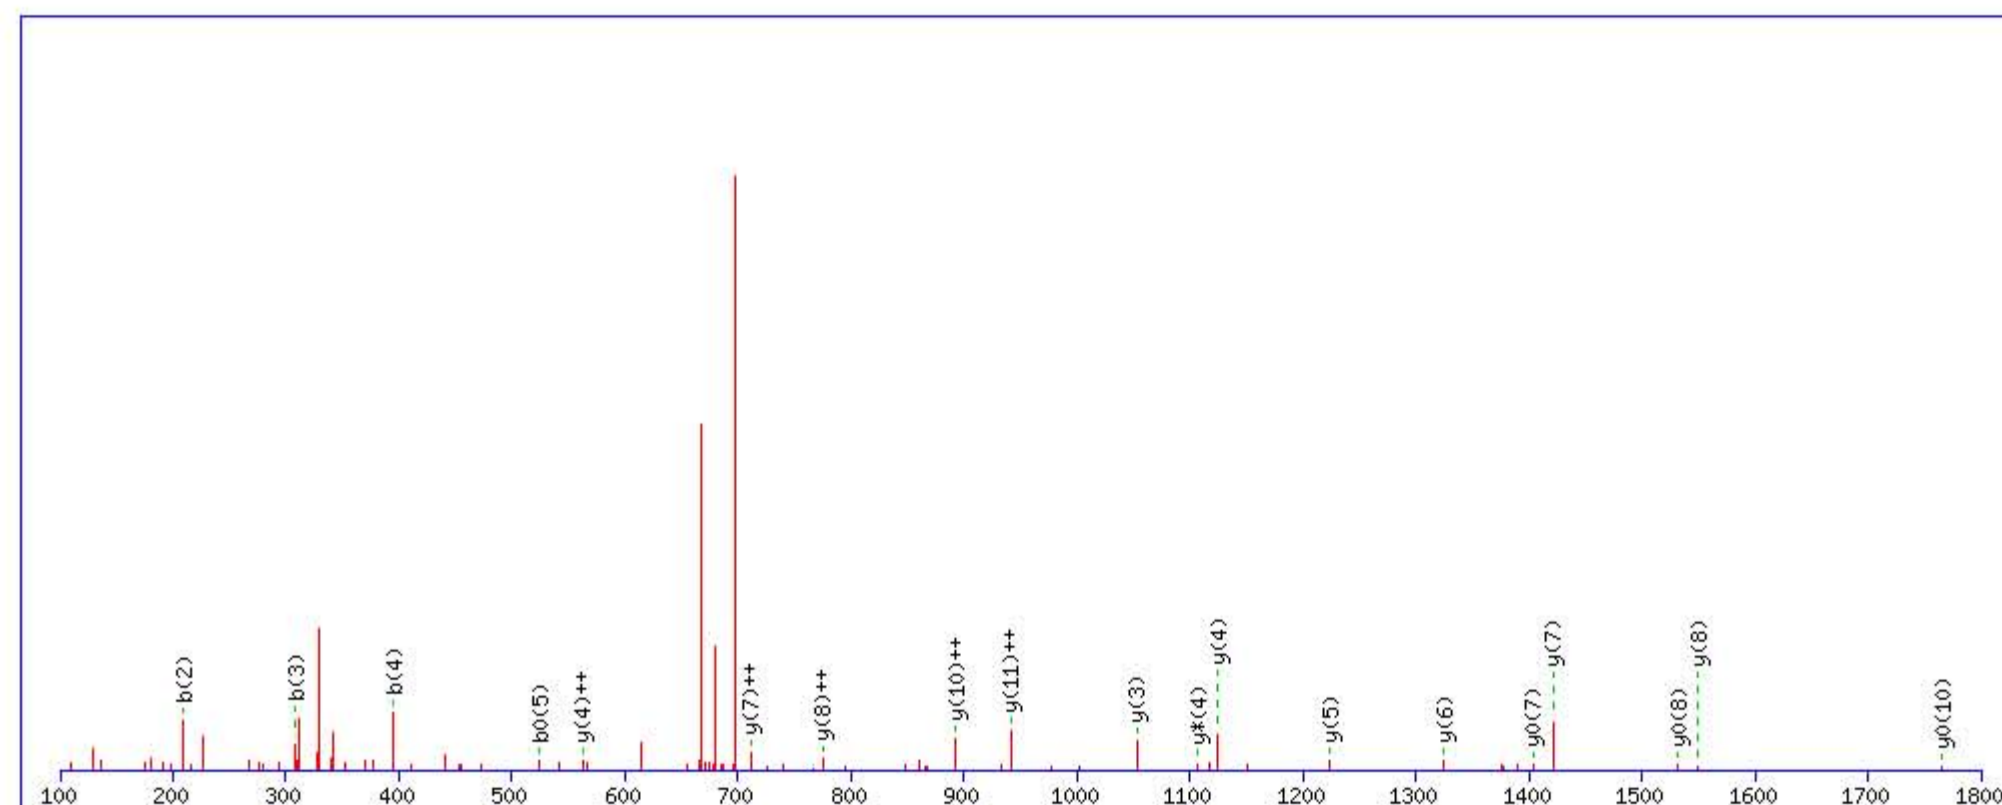

Monoisotopic mass of neutral peptide Mr(calc): 2090.128143

Fixed modifications: Carbamidomethyl (C) (apply to specified residues or termini only)

Variable modifications:

Q11 : Biotin:Thermo-21345 (Q)

Q12 : Biotin:Thermo-21345 (Q)

Ions Score: 31 Expect: 0.018

Matches : 19/118 fragment ions using 30 most intense peaks ([help](#))

| #  | b                 | b <sup>++</sup> | b <sup>*</sup> | b <sup>+++</sup> | b <sup>0</sup>    | b <sup>0++</sup> | Seq. | y                  | y <sup>++</sup>   | y <sup>*</sup>     | y <sup>+++</sup> | y <sup>0</sup>     | y <sup>0++</sup> | #  |
|----|-------------------|-----------------|----------------|------------------|-------------------|------------------|------|--------------------|-------------------|--------------------|------------------|--------------------|------------------|----|
| 1  | 72.044390         | 36.525833       |                |                  |                   |                  | A    |                    |                   |                    |                  |                    |                  | 13 |
| 2  | <b>209.103302</b> | 105.055289      |                |                  |                   |                  | H    | 2020.098306        | 1010.552791       | 2003.071757        | 1002.039517      | 2002.087741        | 1001.547509      | 12 |
| 3  | <b>308.171716</b> | 154.589496      |                |                  |                   |                  | V    | 1883.039394        | <b>942.023335</b> | 1866.012845        | 933.510061       | 1865.028829        | 933.018053       | 11 |
| 4  | <b>395.203744</b> | 198.105510      |                |                  | 377.193179        | 189.100227       | S    | 1783.970980        | <b>892.489128</b> | 1766.944431        | 883.975854       | <b>1765.960415</b> | 883.483846       | 10 |
| 5  | 542.272158        | 271.639717      |                |                  | <b>524.261593</b> | 262.634435       | F    | 1696.938952        | 848.973114        | 1679.912403        | 840.459840       | 1678.928387        | 839.967832       | 9  |
| 6  | 670.367121        | 335.687199      | 653.340572     | 327.173924       | 652.356556        | 326.681916       | K    | <b>1549.870538</b> | <b>775.438907</b> | 1532.843989        | 766.925633       | <b>1531.859973</b> | 766.433625       | 8  |
| 7  | 767.419885        | 384.213581      | 750.393336     | 375.700306       | 749.409320        | 375.208298       | P    | <b>1421.775575</b> | <b>711.391426</b> | 1404.749026        | 702.878151       | <b>1403.765010</b> | 702.386143       | 7  |
| 8  | 868.467564        | 434.737420      | 851.441015     | 426.224146       | 850.456999        | 425.732138       | T    | <b>1324.722811</b> | 662.865044        | 1307.696262        | 654.351769       | 1306.712246        | 653.859761       | 6  |
| 9  | 967.535978        | 484.271627      | 950.509429     | 475.758353       | 949.525413        | 475.266345       | V    | <b>1223.675132</b> | 612.341204        | 1206.648583        | 603.827930       |                    |                  | 5  |
| 10 | 1038.573092       | 519.790184      | 1021.546543    | 511.276910       | 1020.562527       | 510.784902       | A    | <b>1124.606718</b> | <b>562.806997</b> | <b>1107.580169</b> | 554.293723       |                    |                  | 4  |
| 11 | 1477.798418       | 739.402847      | 1460.771869    | 730.889573       | 1459.787853       | 730.397565       | Q    | <b>1053.569604</b> | 527.288440        | 1036.543055        | 518.775166       |                    |                  | 3  |
| 12 | 1917.023744       | 959.015510      | 1899.997195    | 950.502236       | 1899.013179       | 950.010228       | Q    | 614.344278         | 307.675777        | 597.317729         | 299.162503       |                    |                  | 2  |
| 13 |                   |                 |                |                  |                   |                  | R    | 175.118952         | 88.063114         | 158.092403         | 79.549839        |                    |                  | 1  |

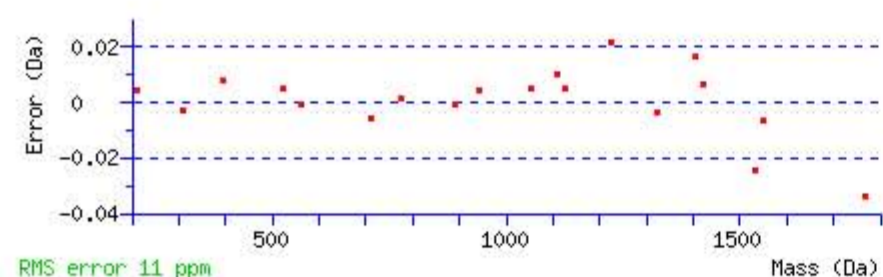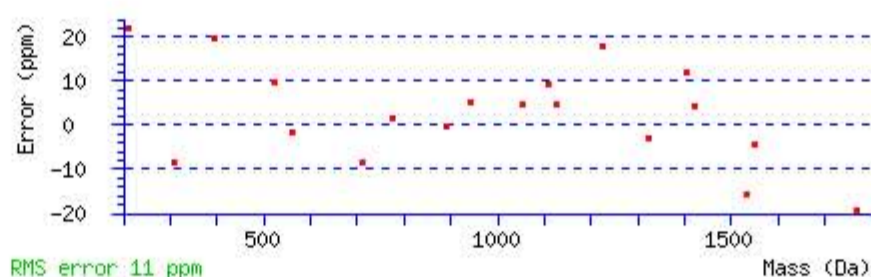

NCBI BLAST search of **AHVSFKPTVAQQR**

(Parameters: blastp, nr protein database, expect=20000, no filter, PAM30)

Other BLAST [web gateways](#)

All matches to this query

| Score | Mr(calc):   | Delta    | Sequence                      |
|-------|-------------|----------|-------------------------------|
| 30.6  | 2090.128143 | 0.000399 | <a href="#">AHVSFKPTVAQQR</a> |

Mascot: <http://www.matrixscience.com/>

# MASCOT SCIENCE Mascot Search Results

## Peptide View

MS/MS Fragmentation of **AEDHFSVIDFNQIR**

Found in **ITIH2\_HUMAN**, Inter-alpha-trypsin inhibitor heavy chain H2 OS=Homo sapiens GN=ITIH2 PE=1 SV=2

Match to Query 41805: 2115.013392 from(706.011740,3+) rtinseconds(2302) index(33623)

Title: Locus:1.1.1.3465.10 File:"2013-07-02 CLN FXIII 180 min 3rd F 3.wiff"

Data file C:\Program Files (x86)\Matrix Science\Mascot Daemon\mgf9 FXIII 180 min 3rd\mascot\_daemon\_merge.mgf

Click mouse within plot area to zoom in by factor of two about that point

Or, Plot from  to  Da

Label all possible matches  Label matches used for scoring

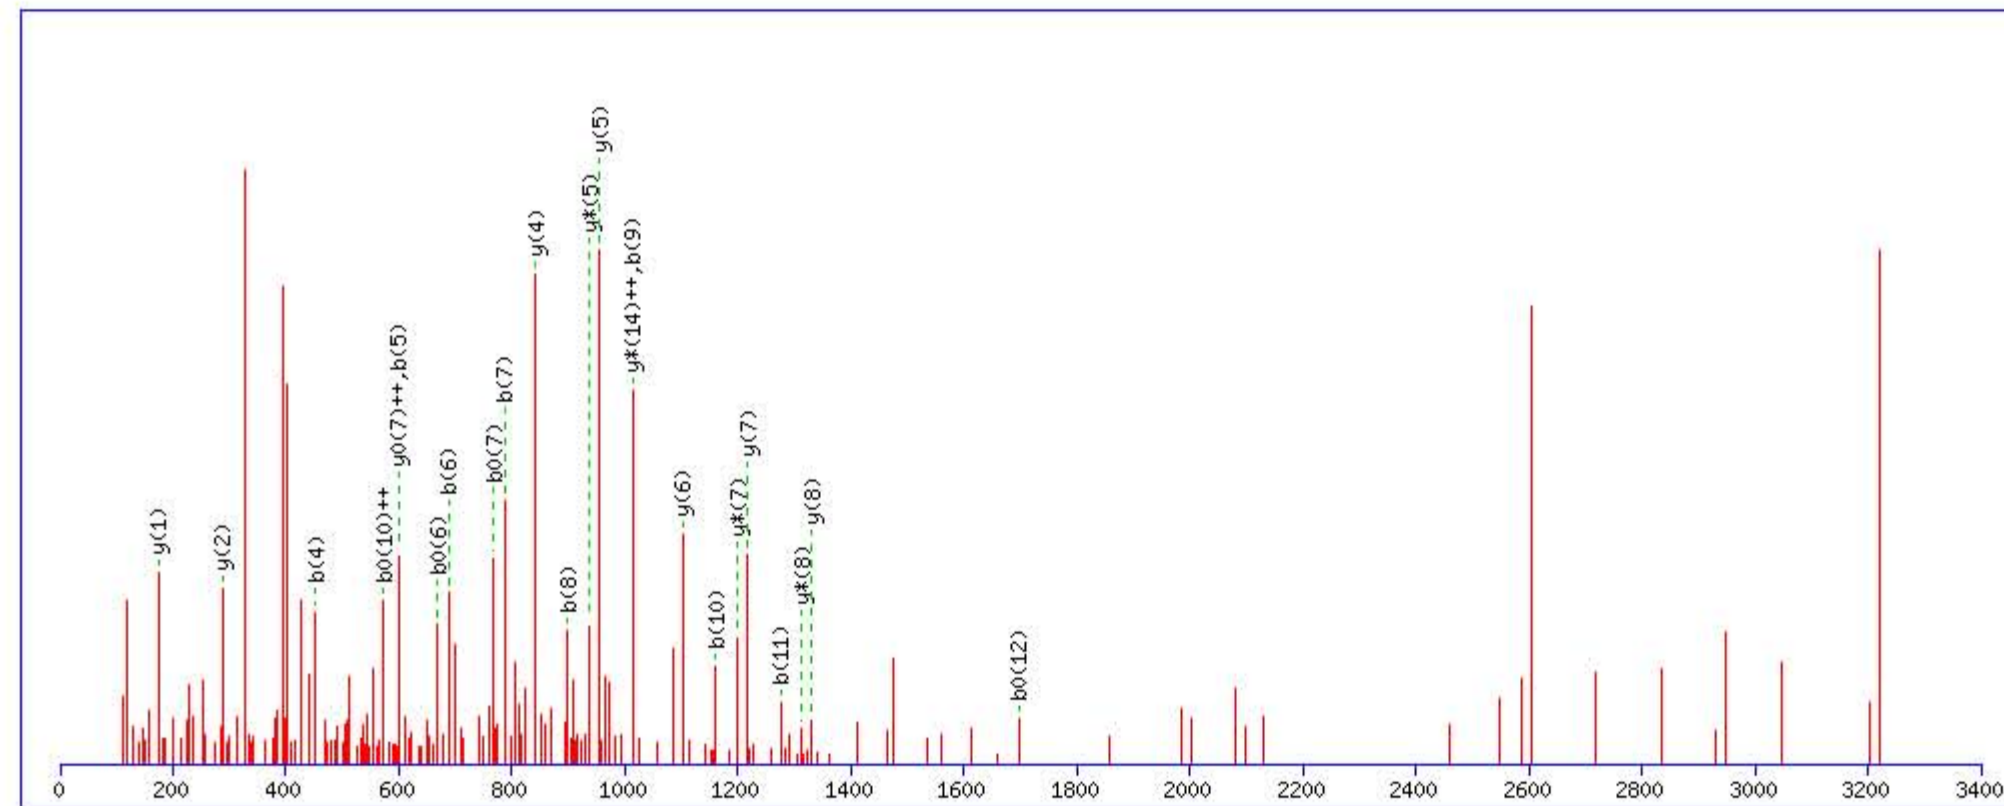

Monoisotopic mass of neutral peptide Mr(calc): 2115.020752

Fixed modifications: Carbamidomethyl (C) (apply to specified residues or termini only)

Variable modifications:

Q12 : Biotin:Thermo-21345 (Q)

Ions Score: 50 Expect: 5.1e-005

Matches : 24/134 fragment ions using 37 most intense peaks [\(help\)](#)

| #  | b           | b <sup>++</sup> | b <sup>*</sup> | b <sup>+++</sup> | b <sup>0</sup> | b <sup>0++</sup> | Seq. | y           | y <sup>++</sup> | y <sup>*</sup> | y <sup>+++</sup> | y <sup>0</sup> | y <sup>0++</sup> | #  |
|----|-------------|-----------------|----------------|------------------|----------------|------------------|------|-------------|-----------------|----------------|------------------|----------------|------------------|----|
| 1  | 72.044390   | 36.525833       |                |                  |                |                  | A    |             |                 |                |                  |                |                  | 15 |
| 2  | 201.086983  | 101.047130      |                |                  | 183.076418     | 92.041847        | E    | 2044.990921 | 1022.999099     | 2027.964372    | 1014.485824      | 2026.980356    | 1013.993816      | 14 |
| 3  | 316.113926  | 158.560601      |                |                  | 298.103361     | 149.555319       | D    | 1915.948328 | 958.477802      | 1898.921779    | 949.964528       | 1897.937763    | 949.472519       | 13 |
| 4  | 453.172838  | 227.090057      |                |                  | 435.162273     | 218.084775       | H    | 1800.921385 | 900.964331      | 1783.894836    | 892.451056       | 1782.910820    | 891.959048       | 12 |
| 5  | 600.241252  | 300.624264      |                |                  | 582.230687     | 291.618982       | F    | 1663.862473 | 832.434874      | 1646.835924    | 823.921600       | 1645.851908    | 823.429592       | 11 |
| 6  | 687.273280  | 344.140278      |                |                  | 669.262715     | 335.134996       | S    | 1516.794059 | 758.900668      | 1499.767510    | 750.387393       | 1498.783494    | 749.895385       | 10 |
| 7  | 786.341694  | 393.674485      |                |                  | 768.331129     | 384.669202       | V    | 1429.762031 | 715.384654      | 1412.735482    | 706.871379       | 1411.751466    | 706.379371       | 9  |
| 8  | 899.425758  | 450.216517      |                |                  | 881.415193     | 441.211234       | I    | 1330.693617 | 665.850447      | 1313.667068    | 657.337172       | 1312.683052    | 656.845164       | 8  |
| 9  | 1014.452701 | 507.729988      |                |                  | 996.442136     | 498.724706       | D    | 1217.609553 | 609.308415      | 1200.583004    | 600.795140       | 1199.598988    | 600.303132       | 7  |
| 10 | 1161.521115 | 581.264196      |                |                  | 1143.510550    | 572.258913       | F    | 1102.582610 | 551.794943      | 1085.556061    | 543.281669       |                |                  | 6  |
| 11 | 1275.564042 | 638.285659      | 1258.537493    | 629.772385       | 1257.553477    | 629.280376       | N    | 955.514196  | 478.260736      | 938.487647     | 469.747462       |                |                  | 5  |
| 12 | 1714.789368 | 857.898322      | 1697.762819    | 849.385048       | 1696.778803    | 848.893039       | Q    | 841.471269  | 421.239273      | 824.444720     | 412.725998       |                |                  | 4  |
| 13 | 1828.832295 | 914.919785      | 1811.805746    | 906.406511       | 1810.821730    | 905.914503       | N    | 402.245943  | 201.626610      | 385.219394     | 193.113335       |                |                  | 3  |
| 14 | 1941.916359 | 971.461817      | 1924.889810    | 962.948543       | 1923.905794    | 962.456535       | I    | 288.203016  | 144.605146      | 271.176467     | 136.091872       |                |                  | 2  |
| 15 |             |                 |                |                  |                |                  | R    | 175.118952  | 88.063114       | 158.092403     | 79.549840        |                |                  | 1  |

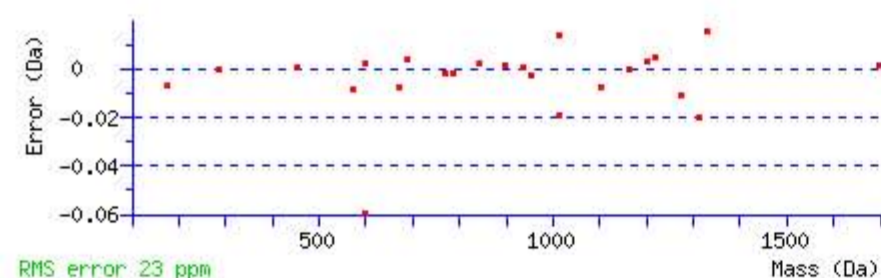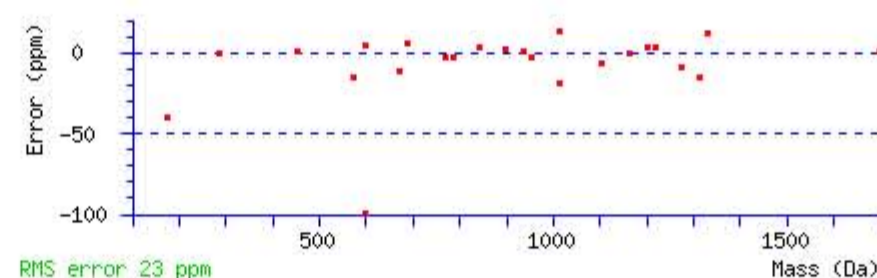

NCBI BLAST search of **AEDHFSVIDFNQIR**

(Parameters: blastp, nr protein database, expect=20000, no filter, PAM30)

Other BLAST [web gateways](#)

All matches to this query

| Score | Mr(calc):   | Delta     | Sequence                       |
|-------|-------------|-----------|--------------------------------|
| 49.7  | 2115.020752 | -0.007360 | <a href="#">AEDHFSVIDFNQIR</a> |
| 3.9   | 2115.033981 | -0.020589 | <a href="#">ESADRQVLMQEEIK</a> |

# MASCOT Search Results

## Peptide View

MS/MS Fragmentation of **VVNNSPQPQNVVFDVQIPK**

Found in **ITIH2\_HUMAN**, Inter-alpha-trypsin inhibitor heavy chain H2 OS=Homo sapiens GN=ITIH2 PE=1 SV=2

Match to Query 47015: 2432.289792 from(811.770540,3+) rtinseconds(2464) index(48631)

Title: Locus:1.1.1.3570.21 File:"2013-07-02 CLN FXIII 180 min 3rd F 4.wiff"

Data file C:\Program Files (x86)\Matrix Science\Mascot Daemon\mgf9 FXIII 180 min 3rd\mascot\_daemon\_merge.mgf

Click mouse within plot area to zoom in by factor of two about that point

Or, Plot from  to  Da

Label all possible matches  Label matches used for scoring

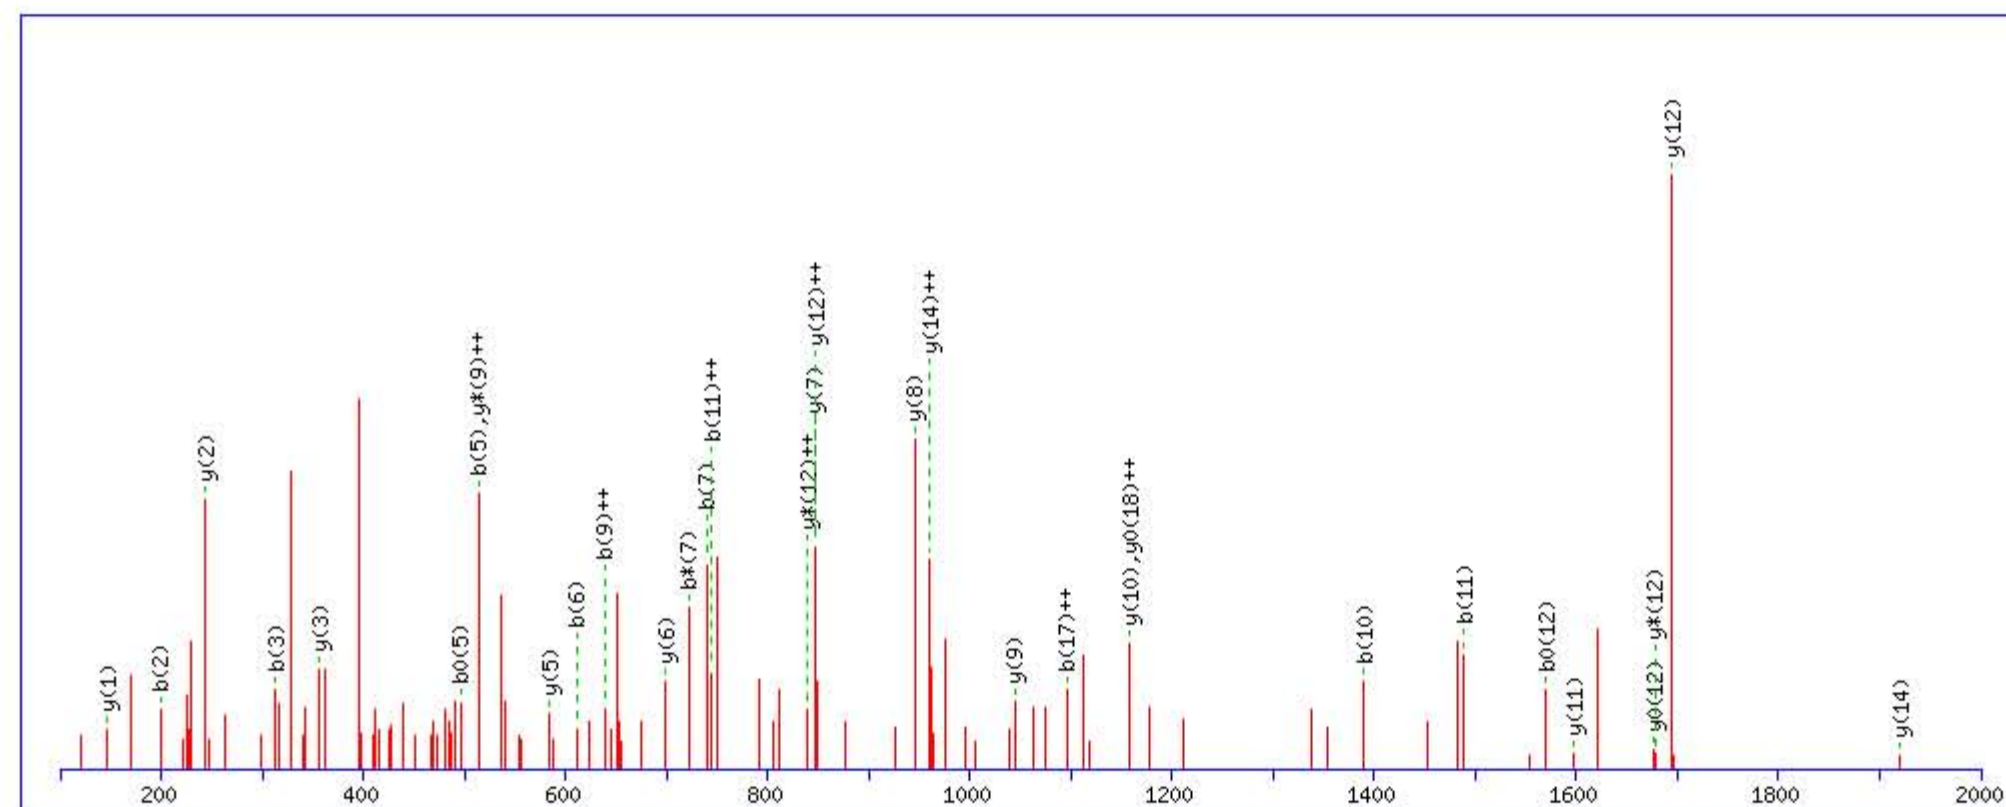

Monoisotopic mass of neutral peptide Mr(calc): 2432.288620

Fixed modifications: Carbamidomethyl (C) (apply to specified residues or termini only)

Variable modifications:

Q9 : Biotin:Thermo-21345 (Q)

Ions Score: 62 Expect: 1.6e-005

Matches : 32/194 fragment ions using 59 most intense peaks [\(help\)](#)

| #  | b                  | b <sup>++</sup>    | b <sup>*</sup>    | b <sup>*++</sup> | b <sup>0</sup>     | b <sup>0++</sup> | Seq. | y                  | y <sup>++</sup>   | y <sup>*</sup>     | y <sup>*++</sup>  | y <sup>0</sup>     | y <sup>0++</sup>   | #  |
|----|--------------------|--------------------|-------------------|------------------|--------------------|------------------|------|--------------------|-------------------|--------------------|-------------------|--------------------|--------------------|----|
| 1  | 100.075690         | 50.541483          |                   |                  |                    |                  | V    |                    |                   |                    |                   |                    |                    | 19 |
| 2  | <b>199.144104</b>  | 100.075690         |                   |                  |                    |                  | V    | 2334.227464        | 1167.617370       | 2317.200915        | 1159.104095       | 2316.216899        | <b>1158.612087</b> | 18 |
| 3  | <b>313.187031</b>  | 157.097153         | 296.160482        | 148.583879       |                    |                  | N    | 2235.159050        | 1118.083163       | 2218.132501        | 1109.569888       | 2217.148485        | 1109.077880        | 17 |
| 4  | 427.229958         | 214.118617         | 410.203409        | 205.605343       |                    |                  | N    | 2121.116123        | 1061.061699       | 2104.089574        | 1052.548425       | 2103.105558        | 1052.056417        | 16 |
| 5  | <b>514.261986</b>  | 257.634631         | 497.235437        | 249.121357       | <b>496.251421</b>  | 248.629349       | S    | 2007.073196        | 1004.040236       | 1990.046647        | 995.526962        | 1989.062631        | 995.034954         | 15 |
| 6  | <b>611.314750</b>  | 306.161013         | 594.288201        | 297.647739       | 593.304185         | 297.155731       | P    | <b>1920.041168</b> | <b>960.524222</b> | 1903.014619        | 952.010948        | 1902.030603        | 951.518940         | 14 |
| 7  | <b>739.373328</b>  | 370.190302         | <b>722.346779</b> | 361.677028       | 721.362763         | 361.185020       | Q    | 1822.988404        | 911.997840        | 1805.961855        | 903.484566        | 1804.977839        | 902.992558         | 13 |
| 8  | 836.426092         | 418.716684         | 819.399543        | 410.203410       | 818.415527         | 409.711402       | P    | <b>1694.929826</b> | <b>847.968551</b> | <b>1677.903277</b> | <b>839.455277</b> | <b>1676.919261</b> | 838.963269         | 12 |
| 9  | 1275.651418        | <b>638.329347</b>  | 1258.624869       | 629.816073       | 1257.640853        | 629.324065       | Q    | <b>1597.877062</b> | 799.442169        | 1580.850513        | 790.928895        | 1579.866497        | 790.436887         | 11 |
| 10 | <b>1389.694345</b> | 695.350811         | 1372.667796       | 686.837536       | 1371.683780        | 686.345528       | N    | <b>1158.651736</b> | 579.829506        | 1141.625187        | 571.316232        | 1140.641171        | 570.824224         | 10 |
| 11 | <b>1488.762759</b> | <b>744.885018</b>  | 1471.736210       | 736.371743       | 1470.752194        | 735.879735       | V    | <b>1044.608809</b> | 522.808043        | 1027.582260        | <b>514.294768</b> | 1026.598244        | 513.802760         | 9  |
| 12 | 1587.831173        | 794.419225         | 1570.804624       | 785.905950       | <b>1569.820608</b> | 785.413942       | V    | <b>945.540395</b>  | 473.273836        | 928.513846         | 464.760561        | 927.529830         | 464.268553         | 8  |
| 13 | 1734.899587        | 867.953432         | 1717.873038       | 859.440157       | 1716.889022        | 858.948149       | F    | <b>846.471981</b>  | 423.739629        | 829.445432         | 415.226354        | 828.461416         | 414.734346         | 7  |
| 14 | 1849.926530        | 925.466903         | 1832.899981       | 916.953629       | 1831.915965        | 916.461621       | D    | <b>699.403567</b>  | 350.205422        | 682.377018         | 341.692147        | 681.393002         | 341.200139         | 6  |
| 15 | 1948.994944        | 975.001110         | 1931.968395       | 966.487836       | 1930.984379        | 965.995828       | V    | <b>584.376624</b>  | 292.691950        | 567.350075         | 284.178676        |                    |                    | 5  |
| 16 | 2077.053522        | 1039.030399        | 2060.026973       | 1030.517124      | 2059.042957        | 1030.025117      | Q    | 485.308210         | 243.157743        | 468.281661         | 234.644469        |                    |                    | 4  |
| 17 | 2190.137586        | <b>1095.572431</b> | 2173.111037       | 1087.059157      | 2172.127021        | 1086.567149      | I    | <b>357.249632</b>  | 179.128454        | 340.223083         | 170.615180        |                    |                    | 3  |
| 18 | 2287.190350        | 1144.098813        | 2270.163801       | 1135.585539      | 2269.179785        | 1135.093531      | P    | <b>244.165568</b>  | 122.586422        | 227.139019         | 114.073148        |                    |                    | 2  |
| 19 |                    |                    |                   |                  |                    |                  | K    | <b>147.112804</b>  | 74.060040         | 130.086255         | 65.546765         |                    |                    | 1  |

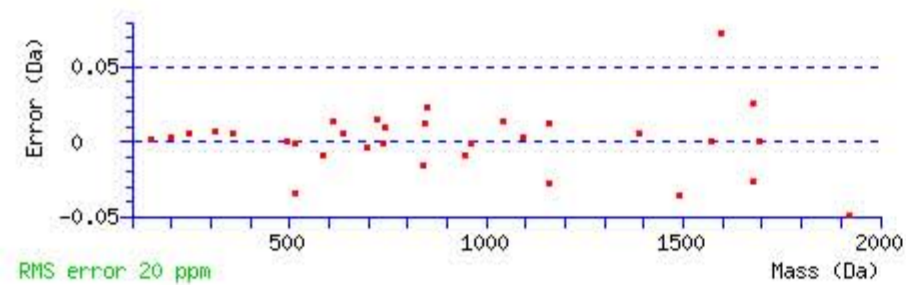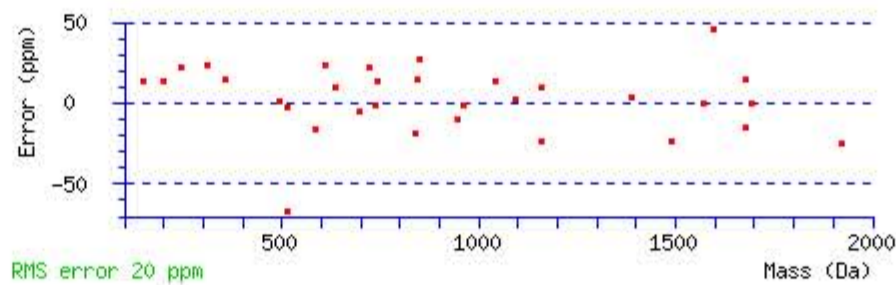

NCBI BLAST search of **VVNNSPQPQNVVFDVQIPK**

(Parameters: blastp, nr protein database, expect=20000, no filter, PAM30)

Other BLAST [web gateways](#)

## All matches to this query

| Score | Mr(calc):   | Delta    | Sequence                            |
|-------|-------------|----------|-------------------------------------|
| 61.6  | 2432.288620 | 0.001172 | <a href="#">VVNNSPQPQNVVFDVQIPK</a> |
| 33.9  | 2432.288620 | 0.001172 | <a href="#">VVNNSPQPQNVVFDVQIPK</a> |
| 24.7  | 2432.288620 | 0.001172 | <a href="#">VVNNSPQPQNVVFDVQIPK</a> |

# Mascot Search Results

## Peptide View

MS/MS Fragmentation of **VVNNSPQPQNVVFDVQIPK**

Found in **ITIH2\_HUMAN**, Inter-alpha-trypsin inhibitor heavy chain H2 OS=Homo sapiens GN=ITIH2 PE=1 SV=2

Match to Query 47016: 2432.290722 from(811.770850,3+) rtinseconds(2437) index(48521)

Title: Locus:1.1.1.3561.4 File:"2013-07-02 CLN FXIII 180 min 3rd F 4.wiff"

Data file C:\Program Files (x86)\Matrix Science\Mascot Daemon\mgf\9 FXIII 180 min 3rd\mascot\_daemon\_merge.mgf

Click mouse within plot area to zoom in by factor of two about that point

Or, Plot from  to  Da

Label all possible matches  Label matches used for scoring

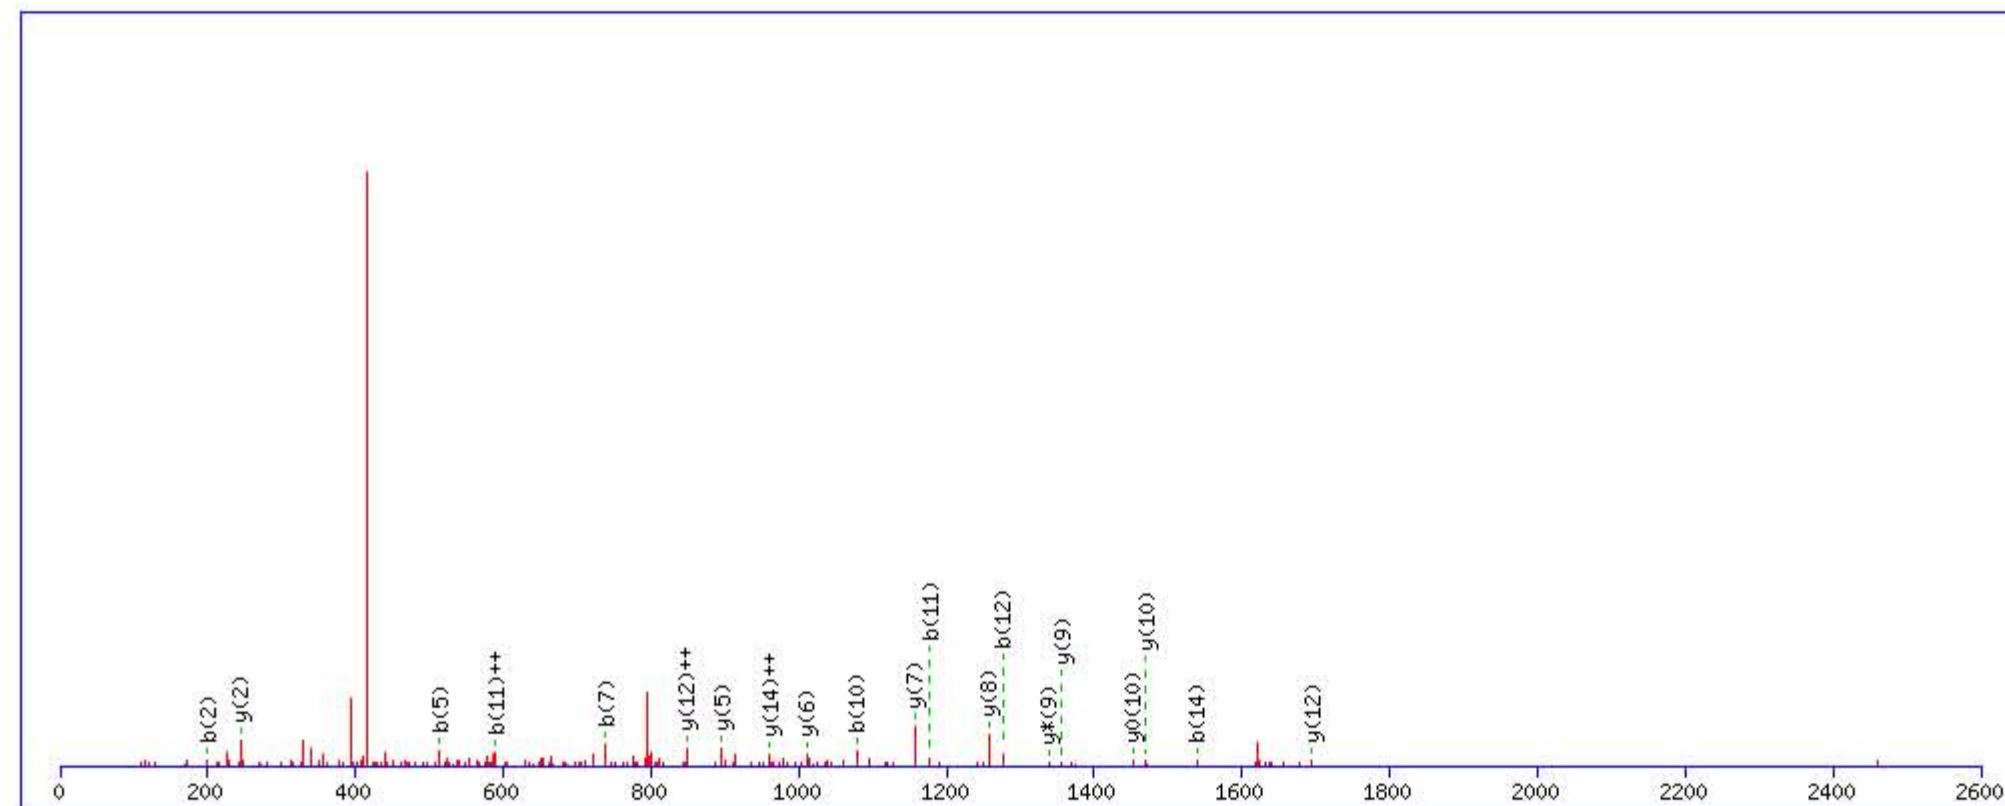

Monoisotopic mass of neutral peptide Mr(calc): 2432.288620

Fixed modifications: Carbamidomethyl (C) (apply to specified residues or termini only)

Variable modifications:

Q16 : Biotin:Thermo-21345 (Q)

Ions Score: 45 Expect: 0.00079

Matches : 20/194 fragment ions using 31 most intense peaks [\(help\)](#)

| #  | b                  | b <sup>++</sup>   | b <sup>*</sup> | b <sup>+++</sup> | b <sup>0</sup> | b <sup>0++</sup> | Seq. | y                  | y <sup>++</sup>   | y <sup>*</sup>     | y <sup>+++</sup> | y <sup>0</sup>     | y <sup>0++</sup> | #  |
|----|--------------------|-------------------|----------------|------------------|----------------|------------------|------|--------------------|-------------------|--------------------|------------------|--------------------|------------------|----|
| 1  | 100.075690         | 50.541483         |                |                  |                |                  | V    |                    |                   |                    |                  |                    |                  | 19 |
| 2  | <b>199.144104</b>  | 100.075690        |                |                  |                |                  | V    | 2334.227464        | 1167.617370       | 2317.200915        | 1159.104096      | 2316.216899        | 1158.612088      | 18 |
| 3  | 313.187031         | 157.097153        | 296.160482     | 148.583879       |                |                  | N    | 2235.159050        | 1118.083163       | 2218.132501        | 1109.569888      | 2217.148485        | 1109.077881      | 17 |
| 4  | 427.229958         | 214.118617        | 410.203409     | 205.605343       |                |                  | N    | 2121.116123        | 1061.061700       | 2104.089574        | 1052.548425      | 2103.105558        | 1052.056417      | 16 |
| 5  | <b>514.261986</b>  | 257.634631        | 497.235437     | 249.121357       | 496.251421     | 248.629349       | S    | 2007.073196        | 1004.040236       | 1990.046647        | 995.526962       | 1989.062631        | 995.034954       | 15 |
| 6  | 611.314750         | 306.161013        | 594.288201     | 297.647739       | 593.304185     | 297.155731       | P    | 1920.041168        | <b>960.524222</b> | 1903.014619        | 952.010948       | 1902.030603        | 951.518940       | 14 |
| 7  | <b>739.373328</b>  | 370.190302        | 722.346779     | 361.677028       | 721.362763     | 361.185020       | Q    | 1822.988404        | 911.997840        | 1805.961855        | 903.484566       | 1804.977839        | 902.992558       | 13 |
| 8  | 836.426092         | 418.716684        | 819.399543     | 410.203410       | 818.415527     | 409.711402       | P    | <b>1694.929826</b> | <b>847.968551</b> | 1677.903277        | 839.455277       | 1676.919261        | 838.963269       | 12 |
| 9  | 964.484670         | 482.745973        | 947.458121     | 474.232699       | 946.474105     | 473.740691       | Q    | 1597.877062        | 799.442169        | 1580.850513        | 790.928895       | 1579.866497        | 790.436887       | 11 |
| 10 | <b>1078.527597</b> | 539.767437        | 1061.501048    | 531.254162       | 1060.517032    | 530.762154       | N    | <b>1469.818484</b> | 735.412880        | 1452.791935        | 726.899606       | <b>1451.807919</b> | 726.407598       | 10 |
| 11 | <b>1177.596011</b> | <b>589.301644</b> | 1160.569462    | 580.788369       | 1159.585446    | 580.296361       | V    | <b>1355.775557</b> | 678.391417        | <b>1338.749008</b> | 669.878142       | 1337.764992        | 669.386134       | 9  |
| 12 | <b>1276.664425</b> | 638.835851        | 1259.637876    | 630.322576       | 1258.653860    | 629.830568       | V    | <b>1256.707143</b> | 628.857210        | 1239.680594        | 620.343935       | 1238.696578        | 619.851927       | 8  |
| 13 | 1423.732839        | 712.370058        | 1406.706290    | 703.856783       | 1405.722274    | 703.364775       | F    | <b>1157.638729</b> | 579.323003        | 1140.612180        | 570.809728       | 1139.628164        | 570.317720       | 7  |
| 14 | <b>1538.759782</b> | 769.883529        | 1521.733233    | 761.370255       | 1520.749217    | 760.878247       | D    | <b>1010.570315</b> | 505.788796        | 993.543766         | 497.275521       | 992.559750         | 496.783513       | 6  |
| 15 | 1637.828196        | 819.417736        | 1620.801647    | 810.904462       | 1619.817631    | 810.412454       | V    | <b>895.543372</b>  | 448.275324        | 878.516823         | 439.762050       |                    |                  | 5  |
| 16 | 2077.053522        | 1039.030399       | 2060.026973    | 1030.517125      | 2059.042957    | 1030.025117      | Q    | 796.474958         | 398.741117        | 779.448409         | 390.227843       |                    |                  | 4  |
| 17 | 2190.137586        | 1095.572431       | 2173.111037    | 1087.059157      | 2172.127021    | 1086.567149      | I    | 357.249632         | 179.128454        | 340.223083         | 170.615180       |                    |                  | 3  |
| 18 | 2287.190350        | 1144.098813       | 2270.163801    | 1135.585539      | 2269.179785    | 1135.093531      | P    | <b>244.165568</b>  | 122.586422        | 227.139019         | 114.073148       |                    |                  | 2  |
| 19 |                    |                   |                |                  |                |                  | K    | 147.112804         | 74.060040         | 130.086255         | 65.546765        |                    |                  | 1  |

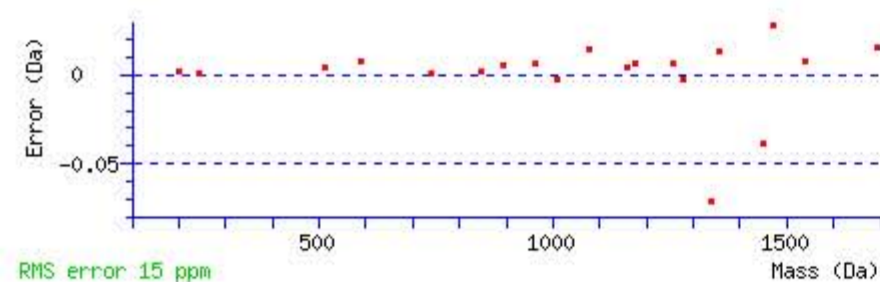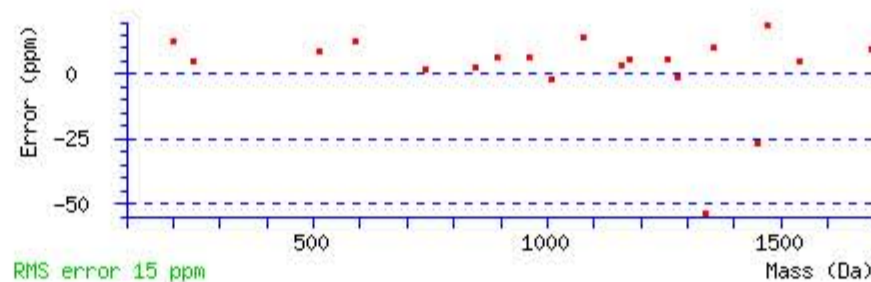

NCBI BLAST search of [VVNNSPQPQNVVFDVQIPK](#)

(Parameters: blastp, nr protein database, expect=20000, no filter, PAM30)

Other BLAST [web gateways](#)

All matches to this query

| Score | Mr(calc):   | Delta    | Sequence                            |
|-------|-------------|----------|-------------------------------------|
| 44.6  | 2432.288620 | 0.002102 | <a href="#">VVNNSPQPQNVVFDVQIPK</a> |
| 1.3   | 2432.288620 | 0.002102 | <a href="#">VVNNSPQPQNVVFDVQIPK</a> |

# Mascot Search Results

## Peptide View

MS/MS Fragmentation of **MLADAPPQDPSCCSGALYYGSK**

Found in **ITIH2\_HUMAN**, Inter-alpha-trypsin inhibitor heavy chain H2 OS=Homo sapiens GN=ITIH2 PE=1 SV=2

Match to Query 50354: 2698.196412 from(900.406080,3+) rtinseconds(2128) index(46774)

Title: Locus:1.1.1.3453.15 File:"2013-07-02 CLN FXIII 180 min 3rd F 4.wiff"

Data file C:\Program Files (x86)\Matrix Science\Mascot Daemon\mgf9 FXIII 180 min 3rd\mascot\_daemon\_merge.mgf

Click mouse within plot area to zoom in by factor of two about that point

Or, Plot from  to  Da

Label all possible matches  Label matches used for scoring

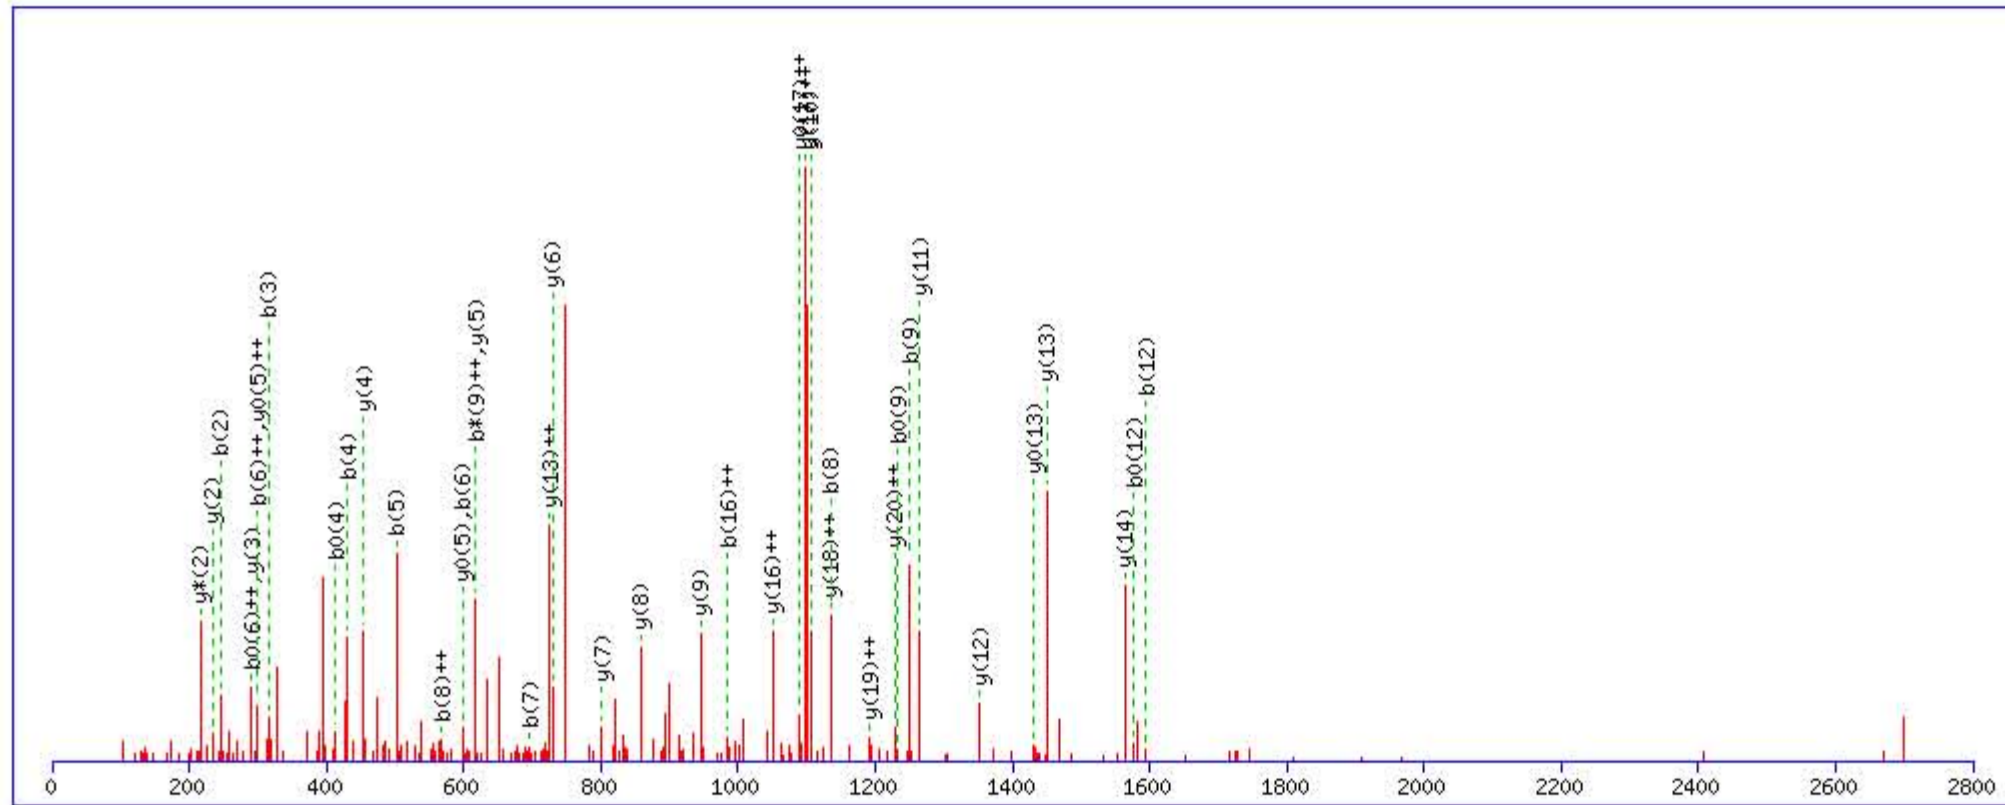

Monoisotopic mass of neutral peptide Mr(calc): 2698.189941

Fixed modifications: Carbamidomethyl (C) (apply to specified residues or termini only)

Variable modifications:

Q8 : Biotin:Thermo-21345 (Q)

Ions Score: 58 Expect: 1.2e-005

Matches : 41/230 fragment ions using 99 most intense peaks [\(help\)](#)

| #  | b                  | b <sup>++</sup>   | b <sup>*</sup> | b <sup>*++</sup>  | b <sup>0</sup>     | b <sup>0++</sup>  | Seq. | y                  | y <sup>++</sup>    | y <sup>*</sup>    | y <sup>*++</sup> | y <sup>0</sup>     | y <sup>0++</sup>   | #  |
|----|--------------------|-------------------|----------------|-------------------|--------------------|-------------------|------|--------------------|--------------------|-------------------|------------------|--------------------|--------------------|----|
| 1  | 132.047761         | 66.527518         |                |                   |                    |                   | M    |                    |                    |                   |                  |                    |                    | 22 |
| 2  | <b>245.131825</b>  | 123.069550        |                |                   |                    |                   | L    | 2568.156746        | 1284.582011        | 2551.130197       | 1276.068736      | 2550.146181        | 1275.576728        | 21 |
| 3  | <b>316.168939</b>  | 158.588107        |                |                   |                    |                   | A    | 2455.072682        | <b>1228.039979</b> | 2438.046133       | 1219.526704      | 2437.062117        | 1219.034696        | 20 |
| 4  | <b>431.195882</b>  | 216.101579        |                |                   | <b>413.185317</b>  | 207.096296        | D    | 2384.035568        | <b>1192.521422</b> | 2367.009019       | 1184.008148      | 2366.025003        | 1183.516140        | 19 |
| 5  | <b>502.232996</b>  | 251.620136        |                |                   | 484.222431         | 242.614854        | A    | 2269.008625        | <b>1135.007950</b> | 2251.982076       | 1126.494676      | 2250.998060        | 1126.002668        | 18 |
| 6  | <b>599.285760</b>  | <b>300.146518</b> |                |                   | 581.275195         | <b>291.141236</b> | P    | 2197.971511        | <b>1099.489394</b> | 2180.944962       | 1090.976119      | 2179.960946        | <b>1090.484111</b> | 17 |
| 7  | <b>696.338524</b>  | 348.672900        |                |                   | 678.327959         | 339.667618        | P    | 2100.918747        | <b>1050.963012</b> | 2083.892198       | 1042.449737      | 2082.908182        | 1041.957729        | 16 |
| 8  | <b>1135.563850</b> | <b>568.285563</b> | 1118.537301    | 559.772289        | 1117.553285        | 559.280281        | Q    | 2003.865983        | 1002.436630        | 1986.839434       | 993.923355       | 1985.855418        | 993.431347         | 15 |
| 9  | <b>1250.590793</b> | 625.799035        | 1233.564244    | <b>617.285760</b> | <b>1232.580228</b> | 616.793752        | D    | <b>1564.640657</b> | 782.823967         | 1547.614108       | 774.310692       | 1546.630092        | 773.818684         | 14 |
| 10 | 1347.643557        | 674.325417        | 1330.617008    | 665.812142        | 1329.632992        | 665.320134        | P    | <b>1449.613714</b> | <b>725.310495</b>  | 1432.587165       | 716.797221       | <b>1431.603149</b> | 716.305213         | 13 |
| 11 | 1434.675585        | 717.841431        | 1417.649036    | 709.328156        | 1416.665020        | 708.836148        | S    | <b>1352.560950</b> | 676.784113         | 1335.534401       | 668.270839       | 1334.550385        | 667.778831         | 12 |
| 12 | <b>1594.706234</b> | 797.856755        | 1577.679685    | 789.343481        | <b>1576.695669</b> | 788.851473        | C    | <b>1265.528922</b> | 633.268099         | 1248.502373       | 624.754825       | 1247.518357        | 624.262817         | 11 |
| 13 | 1754.736883        | 877.872080        | 1737.710334    | 869.358805        | 1736.726318        | 868.866797        | C    | <b>1105.498273</b> | 553.252775         | 1088.471724       | 544.739500       | 1087.487708        | 544.247492         | 10 |
| 14 | 1841.768911        | 921.388094        | 1824.742362    | 912.874819        | 1823.758346        | 912.382811        | S    | <b>945.467624</b>  | 473.237450         | 928.441075        | 464.724176       | 927.457059         | 464.232168         | 9  |
| 15 | 1898.790375        | 949.898826        | 1881.763826    | 941.385551        | 1880.779810        | 940.893543        | G    | <b>858.435596</b>  | 429.721436         | 841.409047        | 421.208162       | 840.425031         | 420.716154         | 8  |
| 16 | 1969.827489        | <b>985.417383</b> | 1952.800940    | 976.904108        | 1951.816924        | 976.412100        | A    | <b>801.414132</b>  | 401.210704         | 784.387583        | 392.697430       | 783.403567         | 392.205422         | 7  |
| 17 | 2082.911553        | 1041.959415       | 2065.885004    | 1033.446140       | 2064.900988        | 1032.954132       | L    | <b>730.377018</b>  | 365.692147         | 713.350469        | 357.178873       | 712.366453         | 356.686865         | 6  |
| 18 | 2245.974882        | 1123.491079       | 2228.948333    | 1114.977805       | 2227.964317        | 1114.485797       | Y    | <b>617.292954</b>  | 309.150115         | 600.266405        | 300.636841       | <b>599.282389</b>  | <b>300.144833</b>  | 5  |
| 19 | 2409.038211        | 1205.022744       | 2392.011662    | 1196.509469       | 2391.027646        | 1196.017461       | Y    | <b>454.229625</b>  | 227.618451         | 437.203076        | 219.105176       | 436.219060         | 218.613168         | 4  |
| 20 | 2466.059675        | 1233.533476       | 2449.033126    | 1225.020201       | 2448.049110        | 1224.528193       | G    | <b>291.166296</b>  | 146.086786         | 274.139747        | 137.573512       | 273.155731         | 137.081504         | 3  |
| 21 | 2553.091703        | 1277.049490       | 2536.065154    | 1268.536215       | 2535.081138        | 1268.044207       | S    | <b>234.144832</b>  | 117.576054         | <b>217.118283</b> | 109.062780       | 216.134267         | 108.570772         | 2  |
| 22 |                    |                   |                |                   |                    |                   | K    | 147.112804         | 74.060040          | 130.086255        | 65.546765        |                    |                    | 1  |

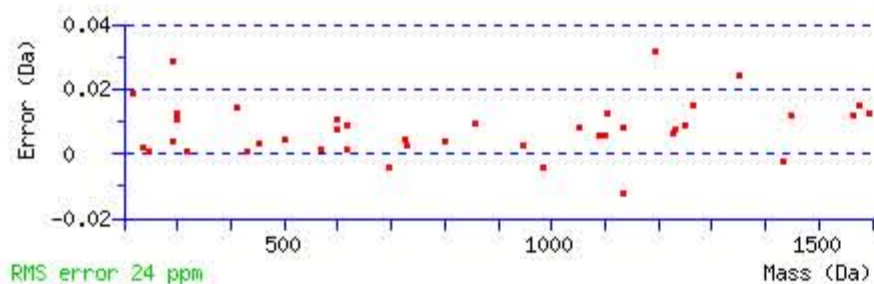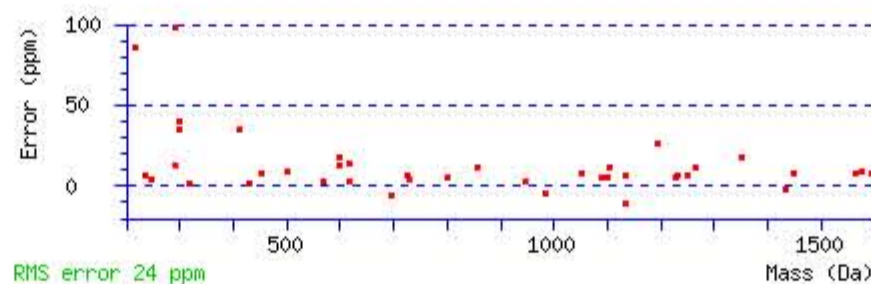

NCBI BLAST search of **MLADAPPQDPSCCSGALYYGSK**  
 (Parameters: blastp, nr protein database, expect=20000, no filter, PAM30)  
 Other BLAST [web gateways](#)

## All matches to this query

| Score | Mr(calc):   | Delta    | Sequence                      |
|-------|-------------|----------|-------------------------------|
| 57.6  | 2698.189941 | 0.006471 | <b>MLADAPPQDPSCCSGALYYGSK</b> |

# Mascot Search Results

## Peptide View

MS/MS Fragmentation of **SILQMSLDHHIVTPLTSLVIENEAGDER**

Found in **ITIH2\_HUMAN**, Inter-alpha-trypsin inhibitor heavy chain H2 OS=Homo sapiens GN=ITIH2 PE=1 SV=2

Match to Query 59131: 3443.751576 from(861.945170,4+) rtinseconds(2670) index(49816)

Title: Locus:1.1.1.3641.23 File:"2013-07-02 CLN FXIII 180 min 3rd F 4.wiff"

Data file C:\Program Files (x86)\Matrix Science\Mascot Daemon\mgf9 FXIII 180 min 3rd\mascot\_daemon\_merge.mgf

Click mouse within plot area to zoom in by factor of two about that point

Or, Plot from 0 to 4000 Da Full range

Label all possible matches  Label matches used for scoring

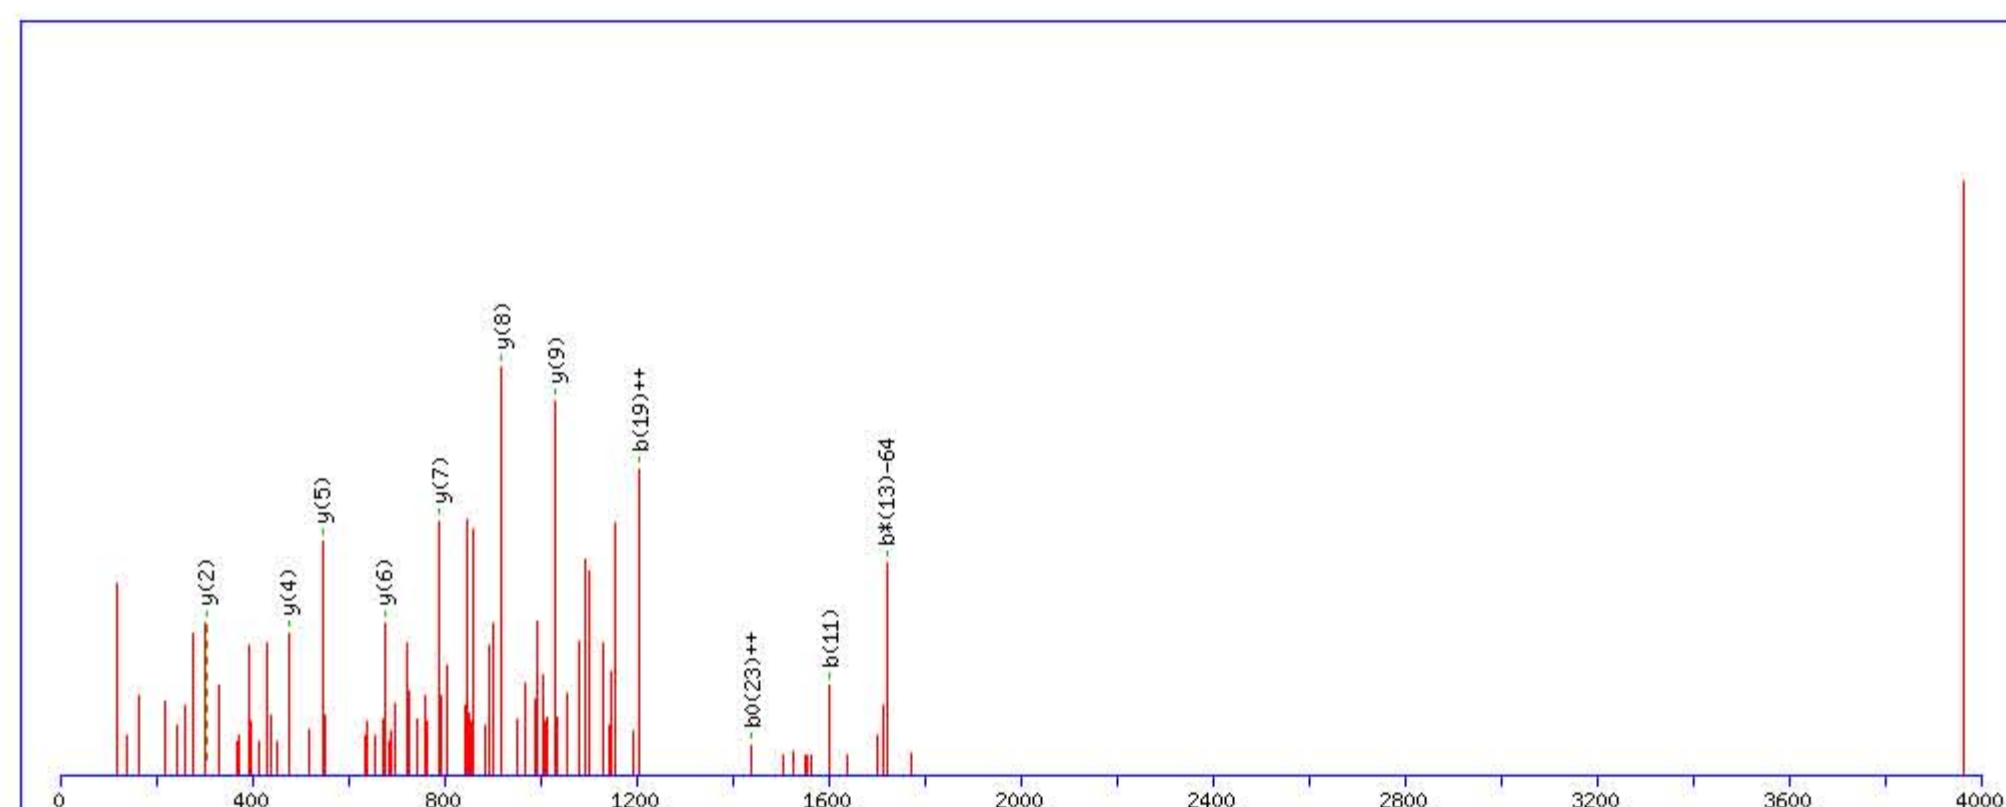

Monoisotopic mass of neutral peptide Mr(calc): 3443.742859

Fixed modifications: Carbamidomethyl (C) (apply to specified residues or termini only)

Variable modifications:

Q4 : Biotin:Thermo-21345 (Q)

M5 : Oxidation (M), with neutral losses 0.000000 (shown in table), 63.998285

Ions Score: 31 Expect: 0.02

Matches : 11/478 fragment ions using 15 most intense peaks [\(help\)](#)

| #  | b                  | b <sup>++</sup>    | b <sup>*</sup> | b <sup>*++</sup> | b <sup>0</sup> | b <sup>0++</sup> | Seq. | y                  | y <sup>++</sup> | y <sup>*</sup> | y <sup>*++</sup> | y <sup>0</sup> | y <sup>0++</sup> | #  |
|----|--------------------|--------------------|----------------|------------------|----------------|------------------|------|--------------------|-----------------|----------------|------------------|----------------|------------------|----|
| 1  | 88.039304          | 44.523290          |                |                  | 70.028739      | 35.518008        | S    |                    |                 |                |                  |                |                  | 28 |
| 2  | 201.123368         | 101.065322         |                |                  | 183.112803     | 92.060039        | I    | 3357.718126        | 1679.362701     | 3340.691577    | 1670.849426      | 3339.707561    | 1670.357418      | 27 |
| 3  | 314.207432         | 157.607354         |                |                  | 296.196867     | 148.602071       | L    | 3244.634062        | 1622.820669     | 3227.607513    | 1614.307394      | 3226.623497    | 1613.815386      | 26 |
| 4  | 753.432758         | 377.220017         | 736.406209     | 368.706743       | 735.422193     | 368.214735       | Q    | 3131.549998        | 1566.278637     | 3114.523449    | 1557.765362      | 3113.539433    | 1557.273354      | 25 |
| 5  | 900.468158         | 450.737717         | 883.441609     | 442.224443       | 882.457593     | 441.732435       | M    | 2692.324672        | 1346.665974     | 2675.298123    | 1338.152699      | 2674.314107    | 1337.660691      | 24 |
| 6  | 987.500186         | 494.253731         | 970.473637     | 485.740456       | 969.489621     | 485.248448       | S    | 2545.289272        | 1273.148274     | 2528.262723    | 1264.634999      | 2527.278707    | 1264.142991      | 23 |
| 7  | 1100.584250        | 550.795763         | 1083.557701    | 542.282489       | 1082.573685    | 541.790480       | L    | 2458.257244        | 1229.632260     | 2441.230695    | 1221.118985      | 2440.246679    | 1220.626977      | 22 |
| 8  | 1215.611193        | 608.309235         | 1198.584644    | 599.795960       | 1197.600628    | 599.303952       | D    | 2345.173180        | 1173.090228     | 2328.146631    | 1164.576953      | 2327.162615    | 1164.084945      | 21 |
| 9  | 1352.670105        | 676.838690         | 1335.643556    | 668.325416       | 1334.659540    | 667.833408       | H    | 2230.146237        | 1115.576756     | 2213.119688    | 1107.063482      | 2212.135672    | 1106.571474      | 20 |
| 10 | 1489.729017        | 745.368146         | 1472.702468    | 736.854872       | 1471.718452    | 736.362864       | H    | 2093.087325        | 1047.047300     | 2076.060776    | 1038.534026      | 2075.076760    | 1038.042018      | 19 |
| 11 | <b>1602.813081</b> | 801.910178         | 1585.786532    | 793.396904       | 1584.802516    | 792.904896       | I    | 1956.028413        | 978.517845      | 1939.001864    | 970.004570       | 1938.017848    | 969.512562       | 18 |
| 12 | 1701.881495        | 851.444385         | 1684.854946    | 842.931111       | 1683.870930    | 842.439103       | V    | 1842.944349        | 921.975813      | 1825.917800    | 913.462538       | 1824.933784    | 912.970530       | 17 |
| 13 | 1802.929174        | 901.968225         | 1785.902625    | 893.454951       | 1784.918609    | 892.962942       | T    | 1743.875935        | 872.441606      | 1726.849386    | 863.928331       | 1725.865370    | 863.436323       | 16 |
| 14 | 1899.981938        | 950.494607         | 1882.955389    | 941.981333       | 1881.971373    | 941.489324       | P    | 1642.828256        | 821.917766      | 1625.801707    | 813.404492       | 1624.817691    | 812.912484       | 15 |
| 15 | 2013.066002        | 1007.036639        | 1996.039453    | 998.523364       | 1995.055437    | 998.031356       | L    | 1545.775492        | 773.391384      | 1528.748943    | 764.878110       | 1527.764927    | 764.386102       | 14 |
| 16 | 2114.113681        | 1057.560478        | 2097.087132    | 1049.047204      | 2096.103116    | 1048.555196      | T    | 1432.691428        | 716.849352      | 1415.664879    | 708.336078       | 1414.680863    | 707.844070       | 13 |
| 17 | 2201.145709        | 1101.076492        | 2184.119160    | 1092.563218      | 2183.135144    | 1092.071210      | S    | 1331.643749        | 666.325513      | 1314.617200    | 657.812238       | 1313.633184    | 657.320230       | 12 |
| 18 | 2314.229773        | 1157.618524        | 2297.203224    | 1149.105250      | 2296.219208    | 1148.613242      | L    | 1244.611721        | 622.809499      | 1227.585172    | 614.296224       | 1226.601156    | 613.804216       | 11 |
| 19 | 2413.298187        | <b>1207.152731</b> | 2396.271638    | 1198.639457      | 2395.287622    | 1198.147449      | V    | 1131.527657        | 566.267467      | 1114.501108    | 557.754192       | 1113.517092    | 557.262184       | 10 |
| 20 | 2526.382251        | 1263.694763        | 2509.355702    | 1255.181489      | 2508.371686    | 1254.689481      | I    | <b>1032.459243</b> | 516.733260      | 1015.432694    | 508.219985       | 1014.448678    | 507.727977       | 9  |
| 21 | 2655.424844        | 1328.216060        | 2638.398295    | 1319.702785      | 2637.414279    | 1319.210777      | E    | <b>919.375179</b>  | 460.191228      | 902.348630     | 451.677953       | 901.364614     | 451.185945       | 8  |
| 22 | 2769.467771        | 1385.237523        | 2752.441222    | 1376.724249      | 2751.457206    | 1376.232241      | N    | <b>790.332586</b>  | 395.669931      | 773.306037     | 387.156657       | 772.322021     | 386.664649       | 7  |
| 23 | 2898.510364        | 1449.758820        | 2881.483815    | 1441.245545      | 2880.499799    | 1440.753537      | E    | <b>676.289659</b>  | 338.648468      | 659.263110     | 330.135193       | 658.279094     | 329.643185       | 6  |
| 24 | 2969.547478        | 1485.277377        | 2952.520929    | 1476.764102      | 2951.536913    | 1476.272094      | A    | <b>547.247066</b>  | 274.127171      | 530.220517     | 265.613897       | 529.236501     | 265.121889       | 5  |
| 25 | 3026.568942        | 1513.788109        | 3009.542393    | 1505.274834      | 3008.558377    | 1504.782826      | G    | <b>476.209952</b>  | 238.608614      | 459.183403     | 230.095339       | 458.199387     | 229.603331       | 4  |
| 26 | 3141.595885        | 1571.301580        | 3124.569336    | 1562.788306      | 3123.585320    | 1562.296298      | D    | 419.188488         | 210.097882      | 402.161939     | 201.584607       | 401.177923     | 201.092599       | 3  |
| 27 | 3270.638478        | 1635.822877        | 3253.611929    | 1627.309602      | 3252.627913    | 1626.817594      | E    | <b>304.161545</b>  | 152.584411      | 287.134996     | 144.071136       | 286.150980     | 143.579128       | 2  |
| 28 |                    |                    |                |                  |                |                  | R    | 175.118952         | 88.063114       | 158.092403     | 79.549839        |                |                  | 1  |

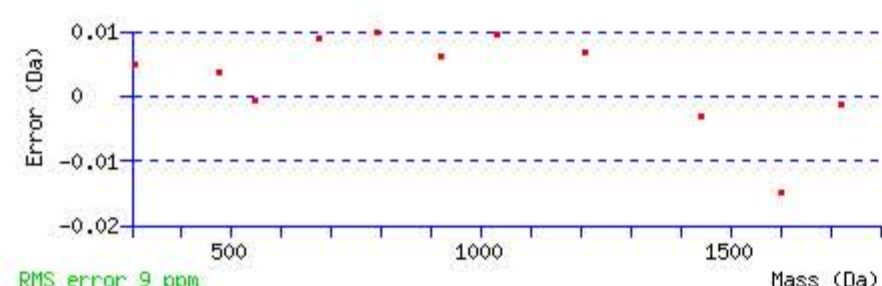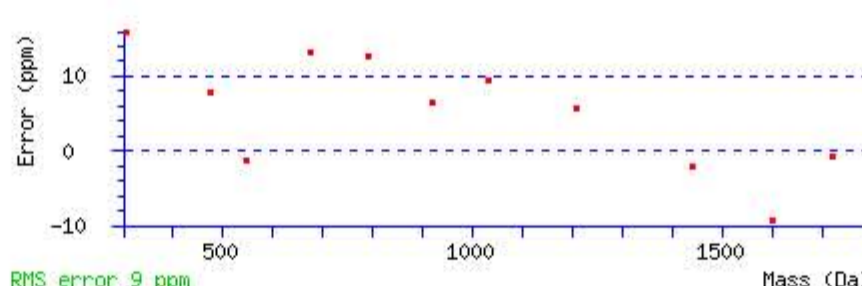

NCBI BLAST search of **SILQMSLDHHIVTPLTSLVIENEAGDER**

(Parameters: blastp, nr protein database, expect=20000, no filter, PAM30)

Other BLAST [web gateways](#)

All matches to this query

| Score | Mr(calc):   | Delta    | Sequence                                     |
|-------|-------------|----------|----------------------------------------------|
| 31.3  | 3443.742859 | 0.008717 | <a href="#">SILQMSLDHHIVTPLTSLVIENEAGDER</a> |

Mascot: <http://www.matrixscience.com/>

**Peptide View**

MS/MS Fragmentation of **NVQFNYPHTSVTDVTDVTQNNFHNHNYFGGSEIVVAGK**  
 Found in **ITIH2\_HUMAN**, Inter-alpha-trypsin inhibitor heavy chain H2 OS=Homo sapiens GN=ITIH2 PE=1 SV=2

Match to Query 62282: 3993.921936 from(999.487760,4+) rtinseconds(2410) index(48416)  
 Title: Locus:1.1.1.3551.13 File:"2013-07-02 CLN FXIII 180 min 3rd F 4.wiff"  
 Data file C:\Program Files (x86)\Matrix Science\Mascot Daemon\mgf9 FXIII 180 min 3rd\mascot\_daemon\_merge.mgf

Click mouse within plot area to zoom in by factor of two about that point

Or, Plot from 0 to 3400 Da Full range

Label all possible matches  Label matches used for scoring

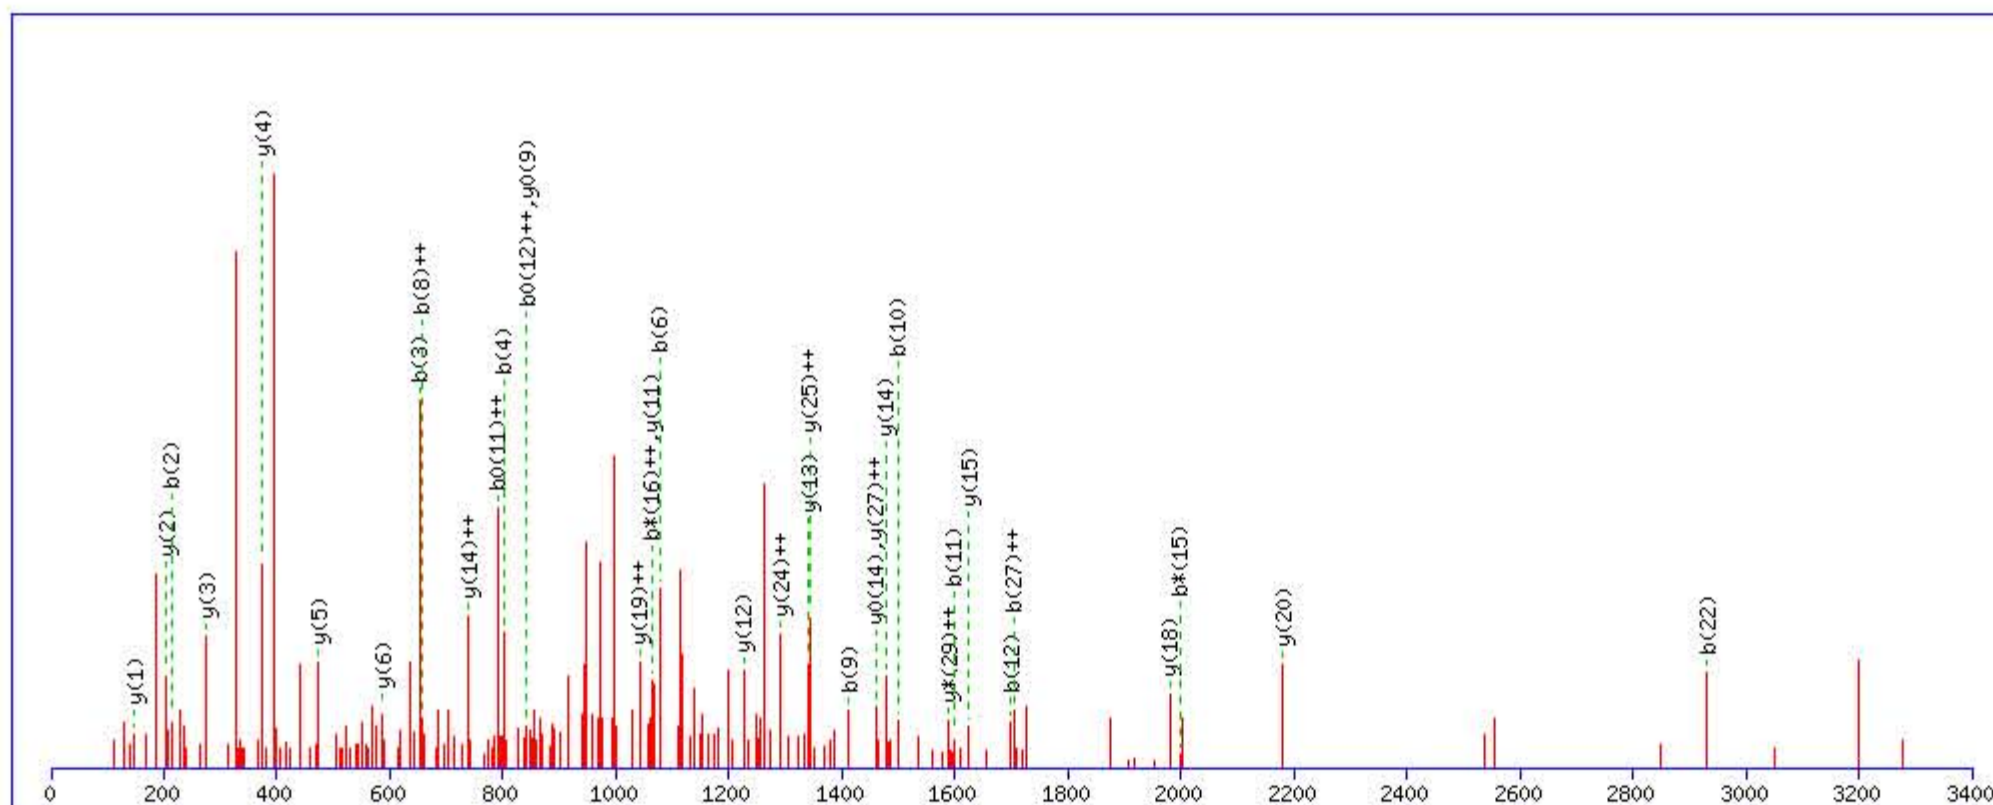

Monoisotopic mass of neutral peptide Mr(calc): 3993.910858  
 Fixed modifications: Carbamidomethyl (C) (apply to specified residues or termini only)  
 Variable modifications:  
 Q3 : Biotin:Thermo-21345 (Q)  
 Ions Score: 42 Expect: 0.0013  
 Matches : 36/356 fragment ions using 100 most intense peaks ([help](#))

| #  | b                  | b <sup>++</sup>    | b <sup>*</sup>     | b <sup>+++</sup>   | b <sup>0</sup> | b <sup>0++</sup>  | Seq. | y                  | y <sup>++</sup>    | y <sup>*</sup> | y <sup>+++</sup>   | y <sup>0</sup>     | y <sup>0++</sup> | #  |
|----|--------------------|--------------------|--------------------|--------------------|----------------|-------------------|------|--------------------|--------------------|----------------|--------------------|--------------------|------------------|----|
| 1  | 115.050203         | 58.028740          | 98.023654          | 49.515465          |                |                   | N    |                    |                    |                |                    |                    |                  | 33 |
| 2  | <b>214.118617</b>  | 107.562947         | 197.092068         | 99.049672          |                |                   | V    | 3880.875173        | 1940.941224        | 3863.848624    | 1932.427950        | 3862.864608        | 1931.935942      | 32 |
| 3  | <b>653.343943</b>  | 327.175610         | 636.317394         | 318.662335         |                |                   | Q    | 3781.806759        | 1891.407017        | 3764.780210    | 1882.893743        | 3763.796194        | 1882.401735      | 31 |
| 4  | <b>800.412357</b>  | 400.709817         | 783.385808         | 392.196542         |                |                   | F    | 3342.581433        | 1671.794354        | 3325.554884    | 1663.281080        | 3324.570868        | 1662.789072      | 30 |
| 5  | 914.455284         | 457.731280         | 897.428735         | 449.218006         |                |                   | N    | 3195.513019        | 1598.260147        | 3178.486470    | <b>1589.746873</b> | 3177.502454        | 1589.254865      | 29 |
| 6  | <b>1077.518613</b> | 539.262945         | 1060.492064        | 530.749670         |                |                   | Y    | 3081.470092        | 1541.238684        | 3064.443543    | 1532.725409        | 3063.459527        | 1532.233401      | 28 |
| 7  | 1174.571377        | 587.789327         | 1157.544828        | 579.276052         |                |                   | P    | 2918.406763        | <b>1459.707019</b> | 2901.380214    | 1451.193745        | 2900.396198        | 1450.701737      | 27 |
| 8  | 1311.630289        | <b>656.318783</b>  | 1294.603740        | 647.805508         |                |                   | H    | 2821.353999        | 1411.180637        | 2804.327450    | 1402.667363        | 2803.343434        | 1402.175355      | 26 |
| 9  | <b>1412.677968</b> | 706.842622         | 1395.651419        | 698.329348         | 1394.667403    | 697.837339        | T    | 2684.295087        | <b>1342.651181</b> | 2667.268538    | 1334.137907        | 2666.284522        | 1333.645899      | 25 |
| 10 | <b>1499.709996</b> | 750.358636         | 1482.683447        | 741.845362         | 1481.699431    | 741.353354        | S    | 2583.247408        | <b>1292.127342</b> | 2566.220859    | 1283.614067        | 2565.236843        | 1283.122059      | 24 |
| 11 | <b>1598.778410</b> | 799.892843         | 1581.751861        | 791.379569         | 1580.767845    | <b>790.887561</b> | V    | 2496.215380        | 1248.611328        | 2479.188831    | 1240.098053        | 2478.204815        | 1239.606045      | 23 |
| 12 | <b>1699.826089</b> | 850.416683         | 1682.799540        | 841.903408         | 1681.815524    | <b>841.411400</b> | T    | 2397.146966        | 1199.077121        | 2380.120417    | 1190.563846        | 2379.136401        | 1190.071838      | 22 |
| 13 | 1814.853032        | 907.930154         | 1797.826483        | 899.416880         | 1796.842467    | 898.924872        | D    | 2296.099287        | 1148.553281        | 2279.072738    | 1140.040007        | 2278.088722        | 1139.547999      | 21 |
| 14 | 1913.921446        | 957.464361         | 1896.894897        | 948.951087         | 1895.910881    | 948.459079        | V    | <b>2181.072344</b> | 1091.039810        | 2164.045795    | 1082.526535        | 2163.061779        | 1082.034527      | 20 |
| 15 | 2014.969125        | 1007.988201        | <b>1997.942576</b> | 999.474926         | 1996.958560    | 998.982918        | T    | 2082.003930        | <b>1041.505603</b> | 2064.977381    | 1032.992328        | 2063.993365        | 1032.500320      | 19 |
| 16 | 2143.027703        | 1072.017490        | 2126.001154        | <b>1063.504215</b> | 2125.017138    | 1063.012207       | Q    | <b>1980.956251</b> | 990.981763         | 1963.929702    | 982.468489         | 1962.945686        | 981.976481       | 18 |
| 17 | 2257.070630        | 1129.038953        | 2240.044081        | 1120.525678        | 2239.060065    | 1120.033671       | N    | 1852.897673        | 926.952474         | 1835.871124    | 918.439200         | 1834.887108        | 917.947192       | 17 |
| 18 | 2371.113557        | 1186.060417        | 2354.087008        | 1177.547142        | 2353.102992    | 1177.055134       | N    | 1738.854746        | 869.931011         | 1721.828197    | 861.417736         | 1720.844181        | 860.925728       | 16 |
| 19 | 2518.181971        | 1259.594623        | 2501.155422        | 1251.081349        | 2500.171406    | 1250.589341       | F    | <b>1624.811819</b> | 812.909547         | 1607.785270    | 804.396273         | 1606.801254        | 803.904265       | 15 |
| 20 | 2655.240883        | 1328.124079        | 2638.214334        | 1319.610805        | 2637.230318    | 1319.118797       | H    | <b>1477.743405</b> | <b>739.375340</b>  | 1460.716856    | 730.862066         | <b>1459.732840</b> | 730.370058       | 14 |
| 21 | 2769.283810        | 1385.145543        | 2752.257261        | 1376.632268        | 2751.273245    | 1376.140260       | N    | <b>1340.684493</b> | 670.845885         | 1323.657944    | 662.332610         | 1322.673928        | 661.840602       | 13 |
| 22 | <b>2932.347139</b> | 1466.677207        | 2915.320590        | 1458.163933        | 2914.336574    | 1457.671925       | Y    | <b>1226.641566</b> | 613.824421         | 1209.615017    | 605.311147         | 1208.631001        | 604.819139       | 12 |
| 23 | 3079.415553        | 1540.211414        | 3062.389004        | 1531.698140        | 3061.404988    | 1531.206132       | F    | <b>1063.578237</b> | 532.292757         | 1046.551688    | 523.779482         | 1045.567672        | 523.287474       | 11 |
| 24 | 3136.437017        | 1568.722146        | 3119.410468        | 1560.208872        | 3118.426452    | 1559.716864       | G    | 916.509823         | 458.758550         | 899.483274     | 450.245275         | 898.499258         | 449.753267       | 10 |
| 25 | 3193.458481        | 1597.232878        | 3176.431932        | 1588.719604        | 3175.447916    | 1588.227596       | G    | 859.488359         | 430.247818         | 842.461810     | 421.734543         | <b>841.477794</b>  | 421.242535       | 9  |
| 26 | 3280.490509        | 1640.748892        | 3263.463960        | 1632.235618        | 3262.479944    | 1631.743610       | S    | 802.466895         | 401.737086         | 785.440346     | 393.223811         | 784.456330         | 392.731803       | 8  |
| 27 | 3409.533102        | <b>1705.270189</b> | 3392.506553        | 1696.756914        | 3391.522537    | 1696.264906       | E    | 715.434867         | 358.221072         | 698.408318     | 349.707797         | 697.424302         | 349.215789       | 7  |
| 28 | 3522.617166        | 1761.812221        | 3505.590617        | 1753.298946        | 3504.606601    | 1752.806938       | I    | <b>586.392274</b>  | 293.699775         | 569.365725     | 285.186501         |                    |                  | 6  |
| 29 | 3621.685580        | 1811.346428        | 3604.659031        | 1802.833153        | 3603.675015    | 1802.341145       | V    | <b>473.308210</b>  | 237.157743         | 456.281661     | 228.644468         |                    |                  | 5  |
| 30 | 3720.753994        | 1860.880635        | 3703.727445        | 1852.367360        | 3702.743429    | 1851.875352       | V    | <b>374.239796</b>  | 187.623536         | 357.213247     | 179.110261         |                    |                  | 4  |
| 31 | 3791.791108        | 1896.399192        | 3774.764559        | 1887.885917        | 3773.780543    | 1887.393909       | A    | <b>275.171382</b>  | 138.089329         | 258.144833     | 129.576055         |                    |                  | 3  |
| 32 | 3848.812572        | 1924.909924        | 3831.786023        | 1916.396649        | 3830.802007    | 1915.904641       | G    | <b>204.134268</b>  | 102.570772         | 187.107719     | 94.057497          |                    |                  | 2  |
| 33 |                    |                    |                    |                    |                |                   | K    | <b>147.112804</b>  | 74.060040          | 130.086255     | 65.546765          |                    |                  | 1  |

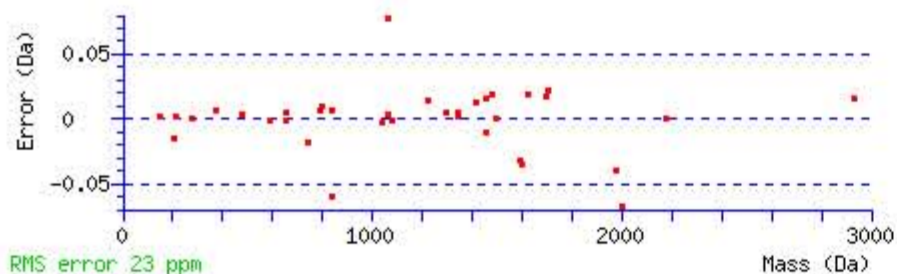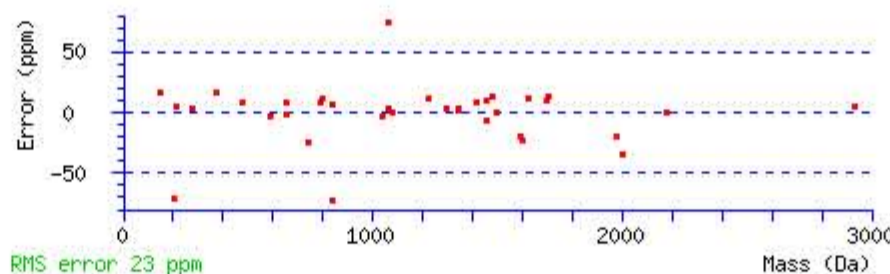

NCBI BLAST search of **NVQFNYPHTSVTDVTDVTQNNFHNHNYFGGSEIVVAGK**  
 (Parameters: blastp, nr protein database, expect=20000, no filter, PAM30)  
 Other BLAST [web gateways](#)

**All matches to this query**

| Score | Mr(calc):   | Delta    | Sequence                                               |
|-------|-------------|----------|--------------------------------------------------------|
| 42.2  | 3993.910858 | 0.011078 | <a href="#">NVQFNYPHTSVTDVTDVTQNNFHNHNYFGGSEIVVAGK</a> |
| 2.6   | 3993.910858 | 0.011078 | <a href="#">NVQFNYPHTSVTDVTDVTQNNFHNHNYFGGSEIVVAGK</a> |

# MASCOT Search Results

## Peptide View

MS/MS Fragmentation of **GHVSFKPSLDQQR**

Found in **ITIH3\_HUMAN**, Inter-alpha-trypsin inhibitor heavy chain H3 OS=Homo sapiens GN=ITIH3 PE=1 SV=2

Match to Query 35900: 1808.928656 from(453.239440,4+) rtinseconds(1626) index(43698)

Title: Locus:1.1.1.3279.8 File:"2013-07-02 CLN FXIII 180 min 3rd F 4.wiff"

Data file C:\Program Files (x86)\Matrix Science\Mascot Daemon\mgf\9 FXIII 180 min 3rd\mascot\_daemon\_merge.mgf

Click mouse within plot area to zoom in by factor of two about that point

Or, Plot from  to  Da

Label all possible matches  Label matches used for scoring

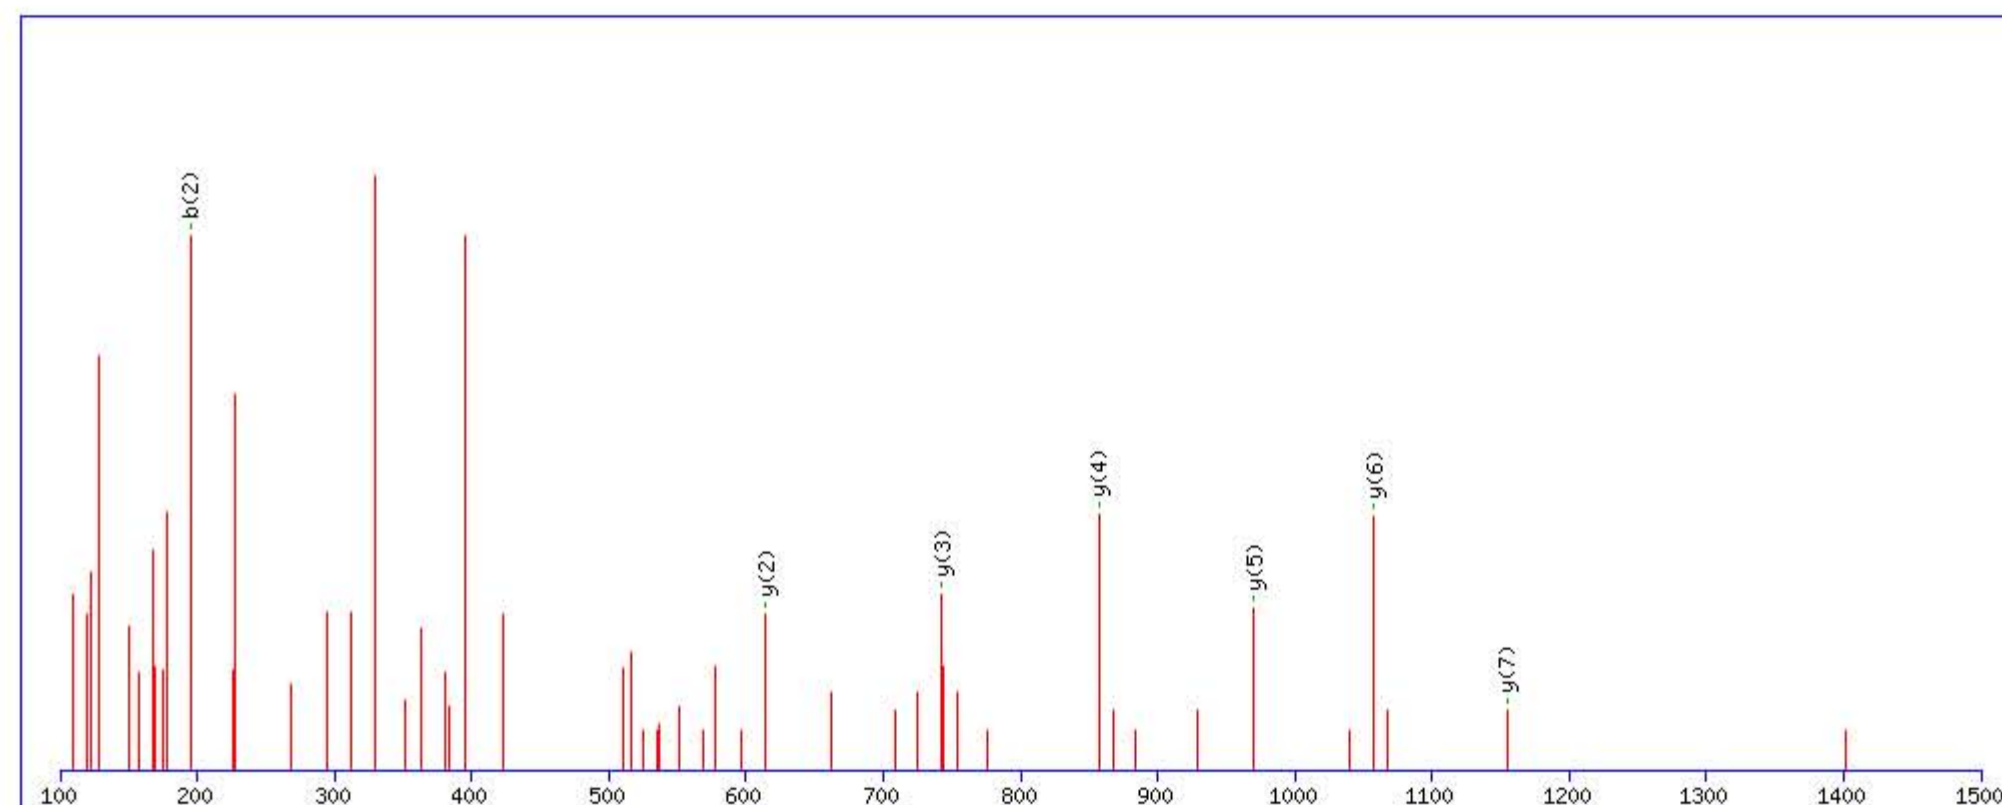

Monoisotopic mass of neutral peptide Mr(calc): 1808.935577

Fixed modifications: Carbamidomethyl (C) (apply to specified residues or termini only)

Variable modifications:

Q12 : Biotin:Thermo-21345 (Q)

Ions Score: 33 Expect: 0.012

Matches : 7/122 fragment ions using 12 most intense peaks [\(help\)](#)

| #  | b                 | b <sup>++</sup> | b <sup>*</sup> | b <sup>*++</sup> | b <sup>0</sup> | b <sup>0++</sup> | Seq. | y                  | y <sup>++</sup> | y <sup>*</sup> | y <sup>*++</sup> | y <sup>0</sup> | y <sup>0++</sup> | #  |
|----|-------------------|-----------------|----------------|------------------|----------------|------------------|------|--------------------|-----------------|----------------|------------------|----------------|------------------|----|
| 1  | 58.028740         | 29.518008       |                |                  |                |                  | G    |                    |                 |                |                  |                |                  | 13 |
| 2  | <b>195.087652</b> | 98.047464       |                |                  |                |                  | H    | 1752.921386        | 876.964331      | 1735.894837    | 868.451057       | 1734.910821    | 867.959049       | 12 |
| 3  | 294.156066        | 147.581671      |                |                  |                |                  | V    | 1615.862474        | 808.434875      | 1598.835925    | 799.921601       | 1597.851909    | 799.429593       | 11 |
| 4  | 381.188094        | 191.097685      |                |                  | 363.177529     | 182.092403       | S    | 1516.794060        | 758.900668      | 1499.767511    | 750.387394       | 1498.783495    | 749.895386       | 10 |
| 5  | 528.256508        | 264.631892      |                |                  | 510.245943     | 255.626610       | F    | 1429.762032        | 715.384654      | 1412.735483    | 706.871380       | 1411.751467    | 706.379372       | 9  |
| 6  | 656.351471        | 328.679374      | 639.324922     | 320.166099       | 638.340906     | 319.674091       | K    | 1282.693618        | 641.850447      | 1265.667069    | 633.337173       | 1264.683053    | 632.845165       | 8  |
| 7  | 753.404235        | 377.205756      | 736.377686     | 368.692481       | 735.393670     | 368.200473       | P    | <b>1154.598655</b> | 577.802966      | 1137.572106    | 569.289691       | 1136.588090    | 568.797683       | 7  |
| 8  | 840.436263        | 420.721770      | 823.409714     | 412.208495       | 822.425698     | 411.716487       | S    | <b>1057.545891</b> | 529.276584      | 1040.519342    | 520.763309       | 1039.535326    | 520.271301       | 6  |
| 9  | 953.520327        | 477.263802      | 936.493778     | 468.750527       | 935.509762     | 468.258519       | L    | <b>970.513863</b>  | 485.760570      | 953.487314     | 477.247295       | 952.503298     | 476.755287       | 5  |
| 10 | 1068.547270       | 534.777273      | 1051.520721    | 526.263999       | 1050.536705    | 525.771991       | D    | <b>857.429799</b>  | 429.218538      | 840.403250     | 420.705263       | 839.419234     | 420.213255       | 4  |
| 11 | 1196.605848       | 598.806562      | 1179.579299    | 590.293288       | 1178.595283    | 589.801279       | Q    | <b>742.402856</b>  | 371.705066      | 725.376307     | 363.191792       |                |                  | 3  |
| 12 | 1635.831174       | 818.419225      | 1618.804625    | 809.905951       | 1617.820609    | 809.413943       | Q    | <b>614.344278</b>  | 307.675777      | 597.317729     | 299.162503       |                |                  | 2  |
| 13 |                   |                 |                |                  |                |                  | R    | 175.118952         | 88.063114       | 158.092403     | 79.549839        |                |                  | 1  |

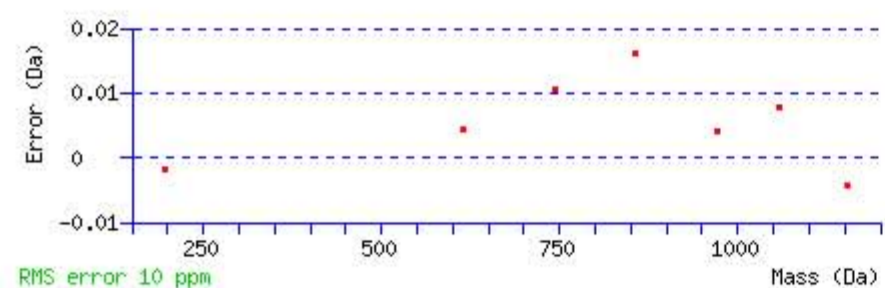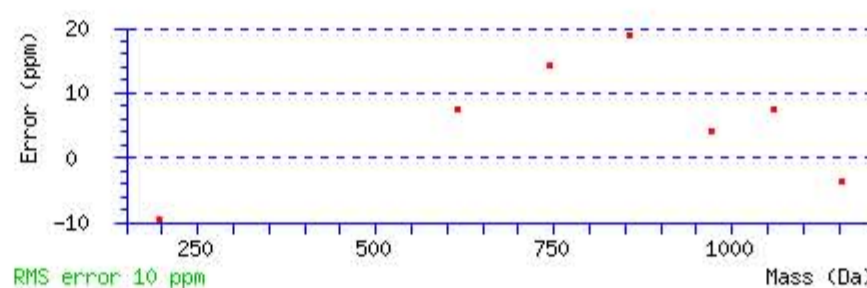

NCBI BLAST search of **GHVSFKPSLDQQR**

(Parameters: blastp, nr protein database, expect=20000, no filter, PAM30)

Other BLAST [web gateways](#)

All matches to this query

| Score | Mr(calc):   | Delta     | Sequence                      |
|-------|-------------|-----------|-------------------------------|
| 33.3  | 1808.935577 | -0.006921 | <a href="#">GHVSFKPSLDQQR</a> |
| 21.5  | 1808.935577 | -0.006921 | <a href="#">GHVSFKPSLDQQR</a> |

Mascot: <http://www.matrixscience.com/>



# MASCOT SEARCH RESULTS

## Peptide View

MS/MS Fragmentation of **KGHVSFKPSLDQQR**

Found in **ITIH3\_HUMAN**, Inter-alpha-trypsin inhibitor heavy chain H3 OS=Homo sapiens GN=ITIH3 PE=1 SV=2

Match to Query 38130: 1937.024456 from(485.263390,4+) rtinseconds(1525) index(43047)

Title: Locus:1.1.1.3244.5 File:"2013-07-02 CLN FXIII 180 min 3rd F 4.wiff"

Data file C:\Program Files (x86)\Matrix Science\Mascot Daemon\mgf\9 FXIII 180 min 3rd\mascot\_daemon\_merge.mgf

Click mouse within plot area to zoom in by factor of two about that point

Or, Plot from  to  Da

Label all possible matches  Label matches used for scoring

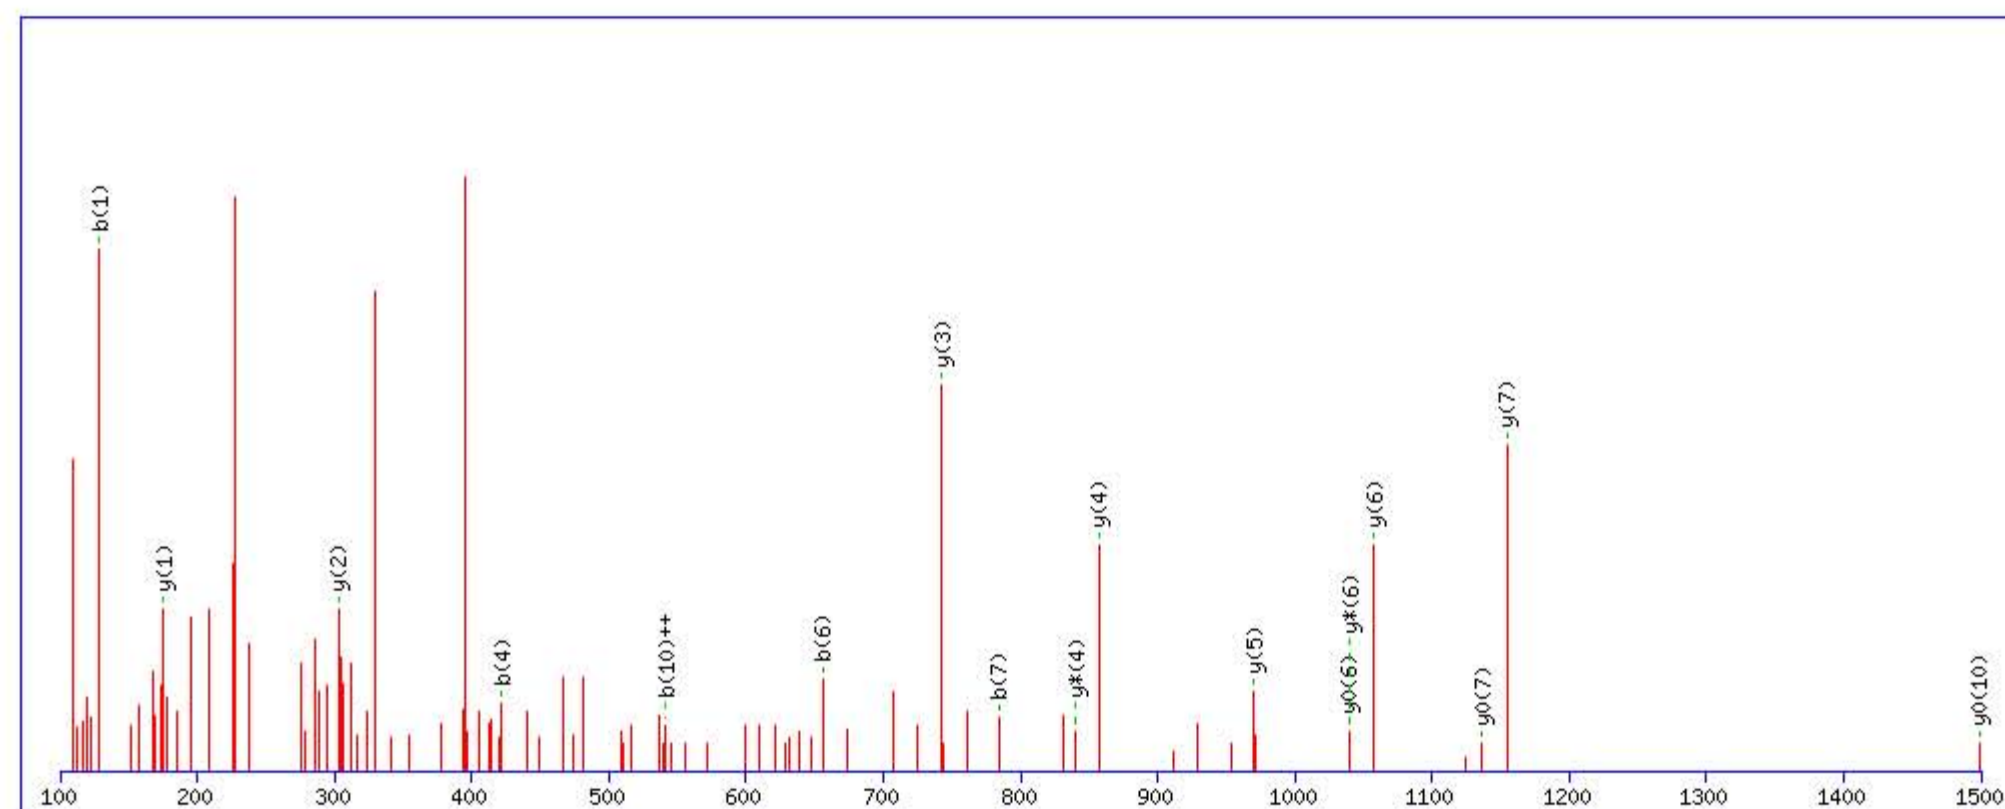

Monoisotopic mass of neutral peptide Mr(calc): 1937.030533

Fixed modifications: Carbamidomethyl (C) (apply to specified residues or termini only)

Variable modifications:

Q12 : Biotin:Thermo-21345 (Q)

Ions Score: 32 Expect: 0.0032

Matches : 17/142 fragment ions using 34 most intense peaks [\(help\)](#)

| #  | b                 | b <sup>++</sup>   | b <sup>*</sup> | b <sup>*++</sup> | b <sup>0</sup> | b <sup>0++</sup> | Seq.     | y                  | y <sup>++</sup> | y <sup>*</sup>     | y <sup>*++</sup> | y <sup>0</sup>     | y <sup>0++</sup> | #  |
|----|-------------------|-------------------|----------------|------------------|----------------|------------------|----------|--------------------|-----------------|--------------------|------------------|--------------------|------------------|----|
| 1  | <b>129.102239</b> | 65.054757         | 112.075690     | 56.541483        |                |                  | <b>K</b> |                    |                 |                    |                  |                    |                  | 14 |
| 2  | 186.123703        | 93.565489         | 169.097154     | 85.052215        |                |                  | <b>G</b> | 1809.942850        | 905.475063      | 1792.916301        | 896.961789       | 1791.932285        | 896.469781       | 13 |
| 3  | 323.182615        | 162.094945        | 306.156066     | 153.581671       |                |                  | <b>H</b> | 1752.921386        | 876.964331      | 1735.894837        | 868.451057       | 1734.910821        | 867.959049       | 12 |
| 4  | <b>422.251029</b> | 211.629153        | 405.224480     | 203.115878       |                |                  | <b>V</b> | 1615.862474        | 808.434875      | 1598.835925        | 799.921601       | 1597.851909        | 799.429593       | 11 |
| 5  | 509.283057        | 255.145167        | 492.256508     | 246.631892       | 491.272492     | 246.139884       | <b>S</b> | 1516.794060        | 758.900668      | 1499.767511        | 750.387394       | <b>1498.783495</b> | 749.895386       | 10 |
| 6  | <b>656.351471</b> | 328.679374        | 639.324922     | 320.166099       | 638.340906     | 319.674091       | <b>F</b> | 1429.762032        | 715.384654      | 1412.735483        | 706.871380       | 1411.751467        | 706.379372       | 9  |
| 7  | <b>784.446434</b> | 392.726855        | 767.419885     | 384.213581       | 766.435869     | 383.721573       | <b>K</b> | 1282.693618        | 641.850447      | 1265.667069        | 633.337173       | 1264.683053        | 632.845165       | 8  |
| 8  | 881.499198        | 441.253237        | 864.472649     | 432.739963       | 863.488633     | 432.247955       | <b>P</b> | <b>1154.598655</b> | 577.802966      | 1137.572106        | 569.289691       | <b>1136.588090</b> | 568.797683       | 7  |
| 9  | 968.531226        | 484.769251        | 951.504677     | 476.255977       | 950.520661     | 475.763969       | <b>S</b> | <b>1057.545891</b> | 529.276584      | <b>1040.519342</b> | 520.763309       | <b>1039.535326</b> | 520.271301       | 6  |
| 10 | 1081.615290       | <b>541.311283</b> | 1064.588741    | 532.798009       | 1063.604725    | 532.306000       | <b>L</b> | <b>970.513863</b>  | 485.760570      | 953.487314         | 477.247295       | 952.503298         | 476.755287       | 5  |
| 11 | 1196.642233       | 598.824755        | 1179.615684    | 590.311480       | 1178.631668    | 589.819472       | <b>D</b> | <b>857.429799</b>  | 429.218538      | <b>840.403250</b>  | 420.705263       | 839.419234         | 420.213255       | 4  |
| 12 | 1635.867559       | 818.437418        | 1618.841010    | 809.924143       | 1617.856994    | 809.432135       | <b>Q</b> | <b>742.402856</b>  | 371.705066      | 725.376307         | 363.191792       |                    |                  | 3  |
| 13 | 1763.926137       | 882.466707        | 1746.899588    | 873.953432       | 1745.915572    | 873.461424       | <b>Q</b> | <b>303.177530</b>  | 152.092403      | 286.150981         | 143.579129       |                    |                  | 2  |
| 14 |                   |                   |                |                  |                |                  | <b>R</b> | <b>175.118952</b>  | 88.063114       | 158.092403         | 79.549839        |                    |                  | 1  |

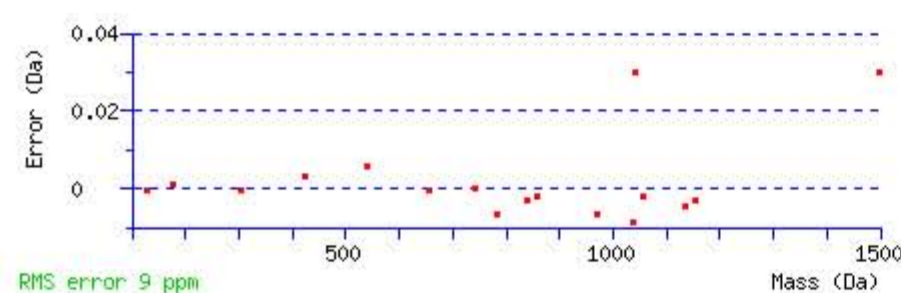

RMS error 9 ppm

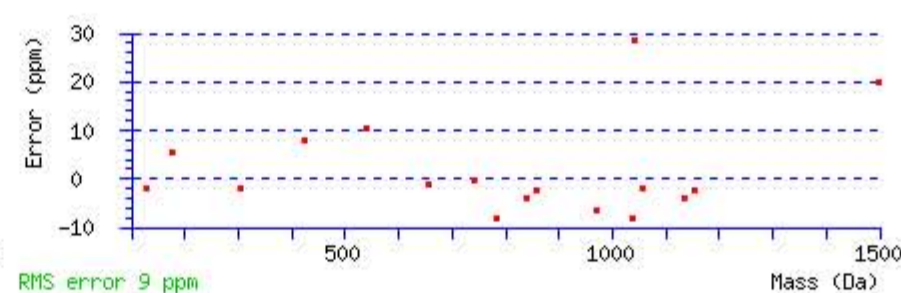

RMS error 9 ppm

NCBI BLAST search of **KGHVSFKPSLDQQR**

(Parameters: blastp, nr protein database, expect=20000, no filter, PAM30)

Other BLAST [web gateways](#)

All matches to this query

| Score | Mr(calc):   | Delta     | Sequence                          |
|-------|-------------|-----------|-----------------------------------|
| 31.7  | 1937.030533 | -0.006077 | <a href="#">KGHVSFKPSLDQQR</a>    |
| 26.8  | 1937.030533 | -0.006077 | <a href="#">KGHVSFKPSLDQQR</a>    |
| 4.9   | 1937.051620 | -0.027164 | <a href="#">QPLEREQCLALLALGAR</a> |
| 0.8   | 1937.008057 | 0.016399  | <a href="#">QSKETPVGWQELPK</a>    |

Mascot: <http://www.matrixscience.com/>

# MASCOT Search Results

## Peptide View

MS/MS Fragmentation of **EHLVQATPENLQEAR**

Found in **ITIH3\_HUMAN**, Inter-alpha-trypsin inhibitor heavy chain H3 OS=Homo sapiens GN=ITIH3 PE=1 SV=2

Match to Query 40718: 2045.035182 from(682.685670,3+) rtinseconds(1784) index(44651)

Title: Locus:1.1.1.3334.7 File:"2013-07-02 CLN FXIII 180 min 3rd F 4.wiff"

Data file C:\Program Files (x86)\Matrix Science\Mascot Daemon\mgf\9 FXIII 180 min 3rd\mascot\_daemon\_merge.mgf

Click mouse within plot area to zoom in by factor of two about that point

Or, Plot from 0 to 2200 Da Full range

Label all possible matches  Label matches used for scoring

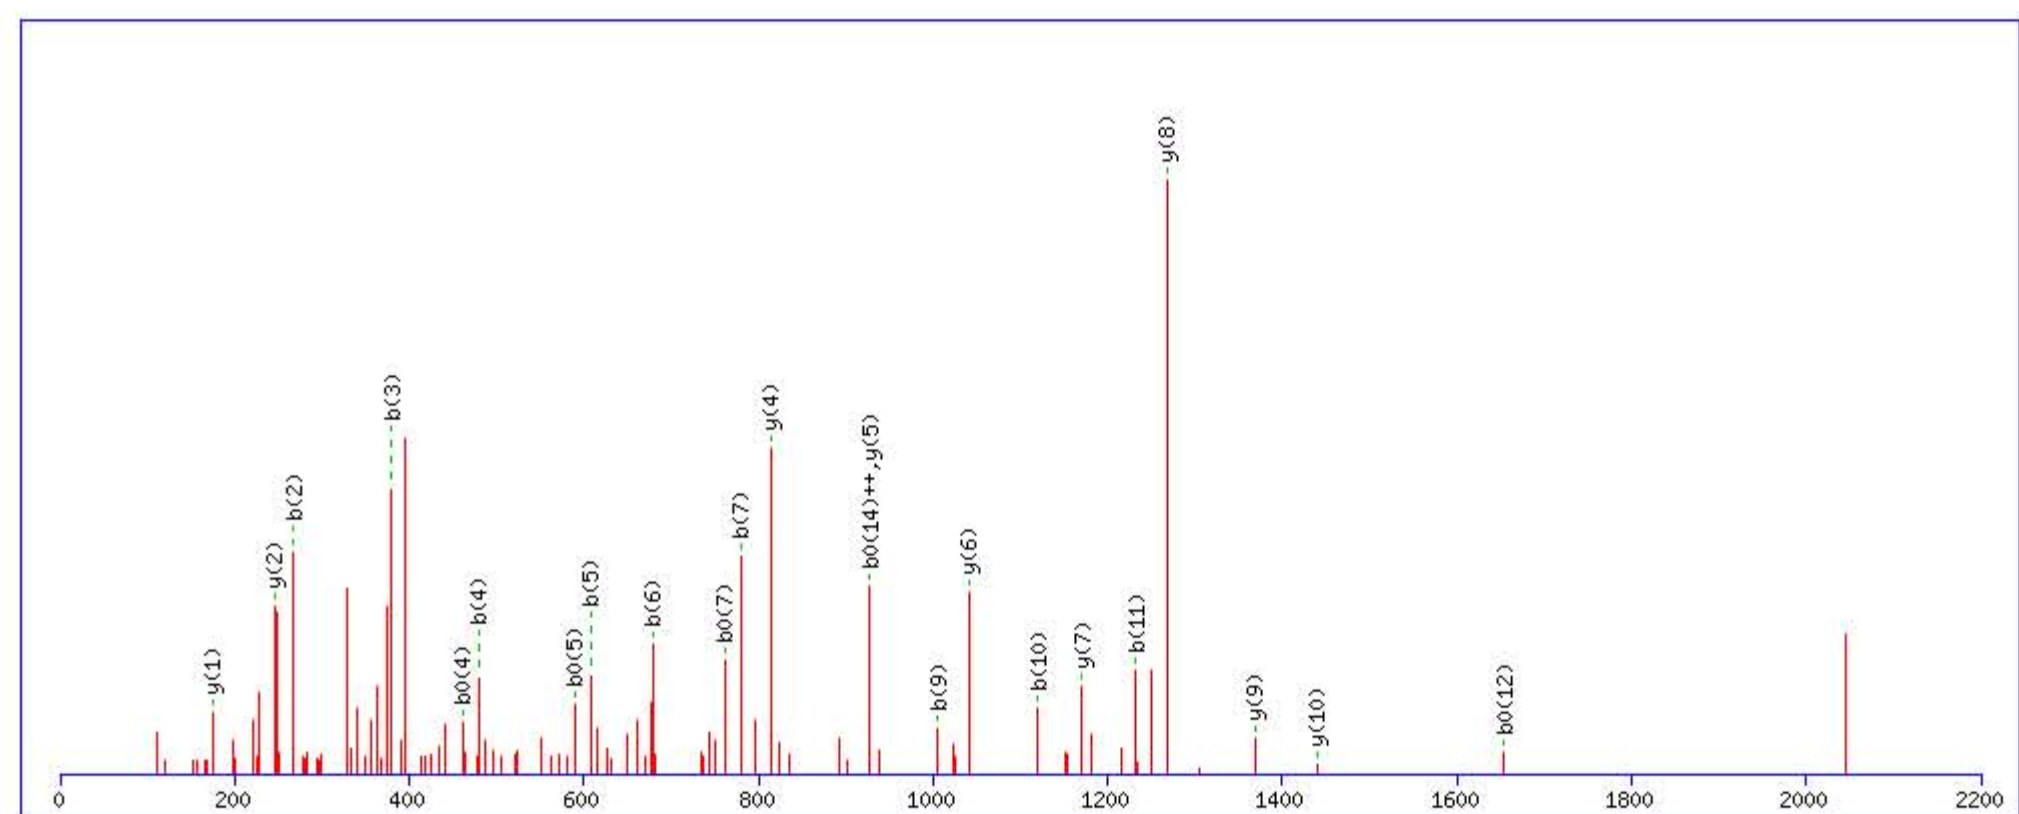

Monoisotopic mass of neutral peptide Mr(calc): 2045.036377

Fixed modifications: Carbamidomethyl (C) (apply to specified residues or termini only)

Variable modifications:

Q12 : Biotin:Thermo-21345 (Q)

Ions Score: 84 Expect: 3.2e-008

Matches : 23/156 fragment ions using 28 most intense peaks (help)

| #  | b                  | b <sup>++</sup> | b <sup>*</sup> | b <sup>+++</sup> | b <sup>0</sup>     | b <sup>0++</sup>  | Seq. | y                  | y <sup>++</sup> | y <sup>*</sup> | y <sup>+++</sup> | y <sup>0</sup> | y <sup>0++</sup> | #  |
|----|--------------------|-----------------|----------------|------------------|--------------------|-------------------|------|--------------------|-----------------|----------------|------------------|----------------|------------------|----|
| 1  | 130.049869         | 65.528572       |                |                  | 112.039304         | 56.523290         | E    |                    |                 |                |                  |                |                  | 15 |
| 2  | <b>267.108781</b>  | 134.058028      |                |                  | 249.098216         | 125.052746        | H    | 1917.001094        | 959.004185      | 1899.974545    | 950.490911       | 1898.990529    | 949.998903       | 14 |
| 3  | <b>380.192845</b>  | 190.600060      |                |                  | 362.182280         | 181.594778        | L    | 1779.942182        | 890.474729      | 1762.915633    | 881.961455       | 1761.931617    | 881.469447       | 13 |
| 4  | <b>479.261259</b>  | 240.134267      |                |                  | <b>461.250694</b>  | 231.128985        | V    | 1666.858118        | 833.932697      | 1649.831569    | 825.419423       | 1648.847553    | 824.927415       | 12 |
| 5  | <b>607.319837</b>  | 304.163557      | 590.293288     | 295.650282       | <b>589.309272</b>  | 295.158274        | Q    | 1567.789704        | 784.398490      | 1550.763155    | 775.885216       | 1549.779139    | 775.393208       | 11 |
| 6  | <b>678.356951</b>  | 339.682114      | 661.330402     | 331.168839       | 660.346386         | 330.676831        | A    | <b>1439.731126</b> | 720.369201      | 1422.704577    | 711.855927       | 1421.720561    | 711.363919       | 10 |
| 7  | <b>779.404630</b>  | 390.205953      | 762.378081     | 381.692679       | <b>761.394065</b>  | 381.200671        | T    | <b>1368.694012</b> | 684.850644      | 1351.667463    | 676.337370       | 1350.683447    | 675.845362       | 9  |
| 8  | 876.457394         | 438.732335      | 859.430845     | 430.219061       | 858.446829         | 429.727053        | P    | <b>1267.646333</b> | 634.326805      | 1250.619784    | 625.813530       | 1249.635768    | 625.321522       | 8  |
| 9  | <b>1005.499987</b> | 503.253632      | 988.473438     | 494.740357       | 987.489422         | 494.248349        | E    | <b>1170.593569</b> | 585.800423      | 1153.567020    | 577.287148       | 1152.583004    | 576.795140       | 7  |
| 10 | <b>1119.542914</b> | 560.275095      | 1102.516365    | 551.761821       | 1101.532349        | 551.269813        | N    | <b>1041.550976</b> | 521.279126      | 1024.524427    | 512.765852       | 1023.540411    | 512.273844       | 6  |
| 11 | <b>1232.626978</b> | 616.817127      | 1215.600429    | 608.303853       | 1214.616413        | 607.811845        | L    | <b>927.508049</b>  | 464.257663      | 910.481500     | 455.744388       | 909.497484     | 455.252380       | 5  |
| 12 | 1671.852304        | 836.429790      | 1654.825755    | 827.916516       | <b>1653.841739</b> | 827.424508        | Q    | <b>814.423985</b>  | 407.715631      | 797.397436     | 399.202356       | 796.413420     | 398.710348       | 4  |
| 13 | 1800.894897        | 900.951087      | 1783.868348    | 892.437812       | 1782.884332        | 891.945804        | E    | 375.198659         | 188.102968      | 358.172110     | 179.589693       | 357.188094     | 179.097685       | 3  |
| 14 | 1871.932011        | 936.469644      | 1854.905462    | 927.956369       | 1853.921446        | <b>927.464361</b> | A    | <b>246.156066</b>  | 123.581671      | 229.129517     | 115.068396       |                |                  | 2  |
| 15 |                    |                 |                |                  |                    |                   | R    | <b>175.118952</b>  | 88.063114       | 158.092403     | 79.549839        |                |                  | 1  |

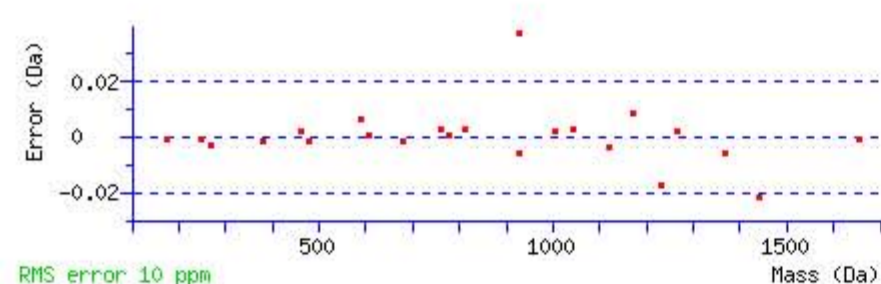

RMS error 10 ppm

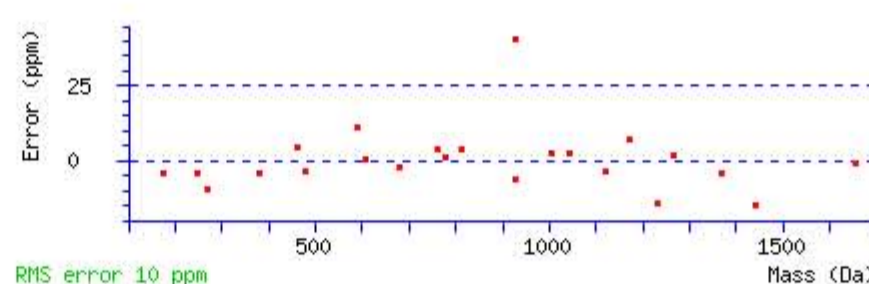

RMS error 10 ppm

NCBI BLAST search of **EHLVQATPENLQEAR**

(Parameters: blastp, nr protein database, expect=20000, no filter, PAM30)

Other BLAST [web gateways](#)

All matches to this query

| Score | Mr(calc):   | Delta     | Sequence                            |
|-------|-------------|-----------|-------------------------------------|
| 84.2  | 2045.036377 | -0.001195 | <a href="#">EHLVQATPENLQEAR</a>     |
| 5.5   | 2045.036377 | -0.001195 | <a href="#">EHLVQATPENLQEAR</a>     |
| 4.0   | 2045.064941 | -0.029759 | <a href="#">ASFVSVGMVKSLTRSSMVK</a> |
| 3.4   | 2045.035889 | -0.000707 | <a href="#">LNMEQLLSASMEK</a>       |
| 0.8   | 2045.014603 | 0.020579  | <a href="#">GPRRMTVIIPGMSAENER</a>  |
| 0.6   | 2045.022446 | 0.012736  | <a href="#">EHNENMLRNILPSHVAR</a>   |

Mascot: <http://www.matrixscience.com/>

# MASCOT Search Results

## Peptide View

MS/MS Fragmentation of **EKAEAQAQYSAAVAK**

Found in **ITIH4\_HUMAN**, Inter-alpha-trypsin inhibitor heavy chain H4 OS=Homo sapiens GN=ITIH4 PE=1 SV=4

Match to Query 37130: 1874.947542 from(625.989790,3+) rtinseconds(1517) index(15964)

Title: Locus:1.1.1.3094.11 File:"2013-07-02 CLN FXIII 180 min 3rd F 2.wiff"

Data file C:\Program Files (x86)\Matrix Science\Mascot Daemon\mgf9 FXIII 180 min 3rd\mascot\_daemon\_merge.mgf

Click mouse within plot area to zoom in by factor of two about that point

Or, Plot from  to  Da

Label all possible matches  Label matches used for scoring

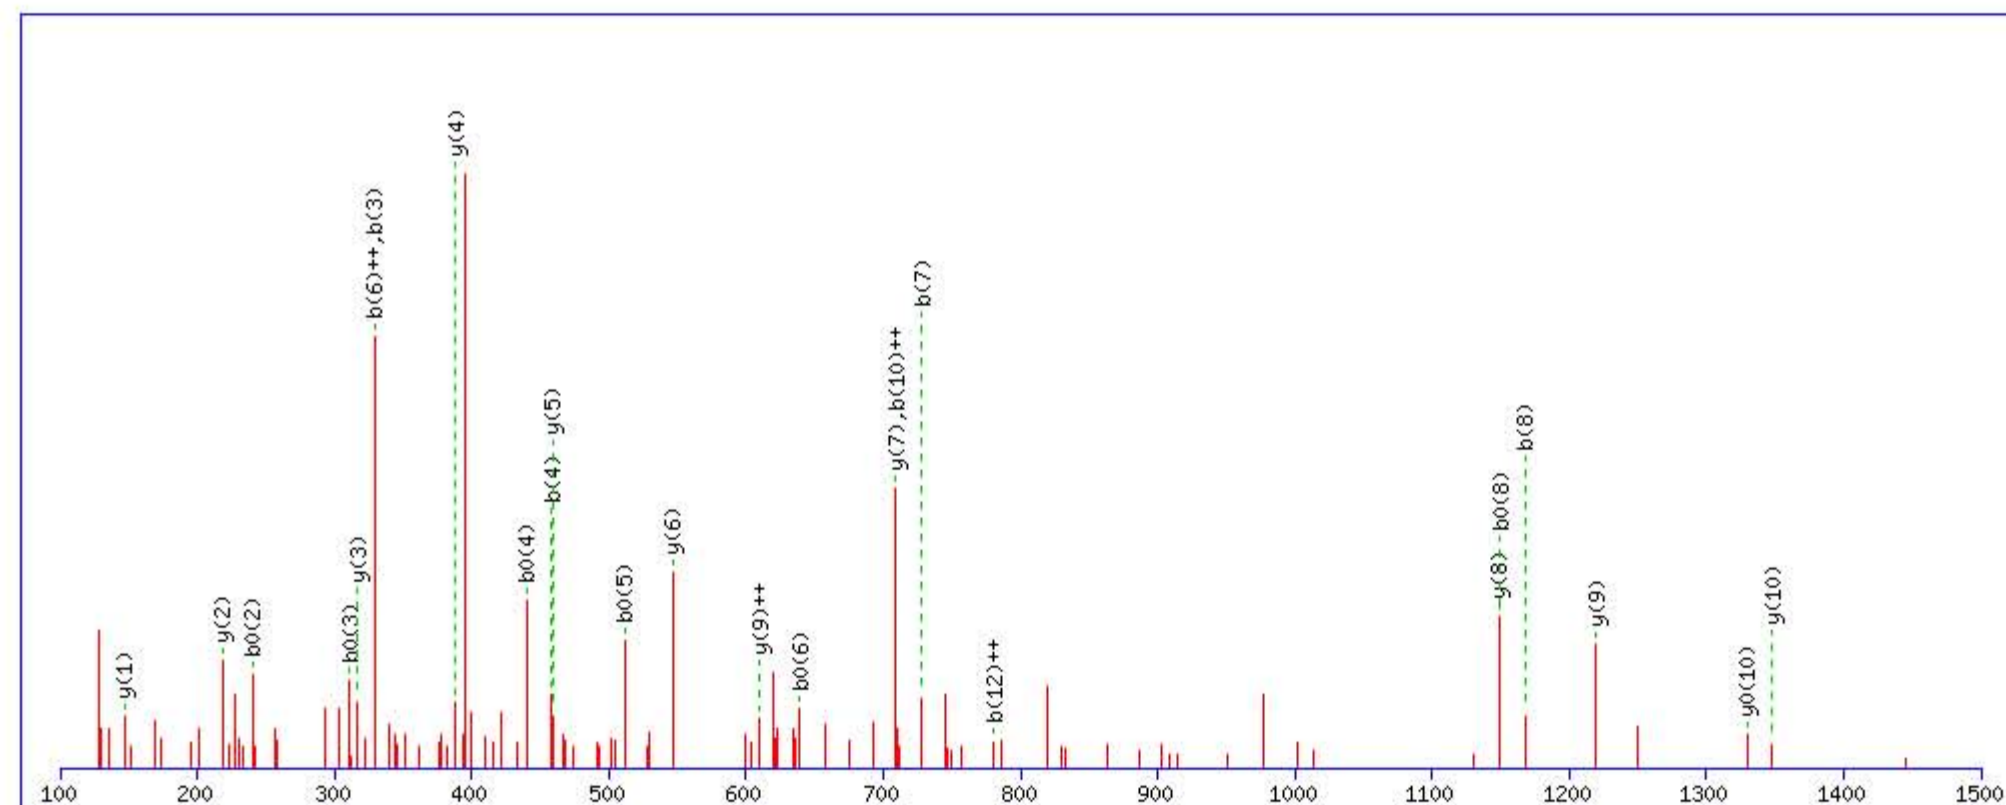

Monoisotopic mass of neutral peptide Mr(calc): 1874.955978

Fixed modifications: Carbamidomethyl (C) (apply to specified residues or termini only)

Variable modifications:

Q8 : Biotin:Thermo-21345 (Q)

Ions Score: 55 Expect: 8.4e-005

Matches : 25/156 fragment ions using 44 most intense peaks [\(help\)](#)

| #  | b           | b <sup>++</sup> | b <sup>+</sup> | b <sup>+++</sup> | b <sup>0</sup> | b <sup>0++</sup> | Seq. | y           | y <sup>++</sup> | y <sup>+</sup> | y <sup>+++</sup> | y <sup>0</sup> | y <sup>0++</sup> | #  |
|----|-------------|-----------------|----------------|------------------|----------------|------------------|------|-------------|-----------------|----------------|------------------|----------------|------------------|----|
| 1  | 130.049869  | 65.528572       |                |                  | 112.039304     | 56.523290        | E    |             |                 |                |                  |                |                  | 15 |
| 2  | 258.144832  | 129.576054      | 241.118283     | 121.062780       | 240.134267     | 120.570772       | K    | 1746.920719 | 873.963998      | 1729.894170    | 865.450723       | 1728.910154    | 864.958715       | 14 |
| 3  | 329.181946  | 165.094611      | 312.155397     | 156.581336       | 311.171381     | 156.089328       | A    | 1618.825756 | 809.916516      | 1601.799207    | 801.403242       | 1600.815191    | 800.911233       | 13 |
| 4  | 458.224539  | 229.615907      | 441.197990     | 221.102633       | 440.213974     | 220.610625       | E    | 1547.788642 | 774.397959      | 1530.762093    | 765.884685       | 1529.778077    | 765.392677       | 12 |
| 5  | 529.261653  | 265.134465      | 512.235104     | 256.621190       | 511.251088     | 256.129182       | A    | 1418.746049 | 709.876663      | 1401.719500    | 701.363388       | 1400.735484    | 700.871380       | 11 |
| 6  | 657.320231  | 329.163754      | 640.293682     | 320.650479       | 639.309666     | 320.158471       | Q    | 1347.708935 | 674.358106      | 1330.682386    | 665.844831       | 1329.698370    | 665.352823       | 10 |
| 7  | 728.357345  | 364.682311      | 711.330796     | 356.169036       | 710.346780     | 355.677028       | A    | 1219.650357 | 610.328817      | 1202.623808    | 601.815542       | 1201.639792    | 601.323534       | 9  |
| 8  | 1167.582671 | 584.294973      | 1150.556122    | 575.781699       | 1149.572106    | 575.289691       | Q    | 1148.613243 | 574.810260      | 1131.586694    | 566.296985       | 1130.602678    | 565.804977       | 8  |
| 9  | 1330.646000 | 665.826638      | 1313.619451    | 657.313364       | 1312.635435    | 656.821355       | Y    | 709.387917  | 355.197597      | 692.361368     | 346.684322       | 691.377352     | 346.192314       | 7  |
| 10 | 1417.678028 | 709.342652      | 1400.651479    | 700.829378       | 1399.667463    | 700.337370       | S    | 546.324588  | 273.665932      | 529.298039     | 265.152658       | 528.314023     | 264.660650       | 6  |
| 11 | 1488.715142 | 744.861209      | 1471.688593    | 736.347935       | 1470.704577    | 735.855927       | A    | 459.292560  | 230.149918      | 442.266011     | 221.636643       |                |                  | 5  |
| 12 | 1559.752256 | 780.379766      | 1542.725707    | 771.866492       | 1541.741691    | 771.374484       | A    | 388.255446  | 194.631361      | 371.228897     | 186.118087       |                |                  | 4  |
| 13 | 1658.820670 | 829.913973      | 1641.794121    | 821.400699       | 1640.810105    | 820.908691       | V    | 317.218332  | 159.112804      | 300.191783     | 150.599530       |                |                  | 3  |
| 14 | 1729.857784 | 865.432530      | 1712.831235    | 856.919256       | 1711.847219    | 856.427248       | A    | 218.149918  | 109.578597      | 201.123369     | 101.065322       |                |                  | 2  |
| 15 |             |                 |                |                  |                |                  | K    | 147.112804  | 74.060040       | 130.086255     | 65.546765        |                |                  | 1  |

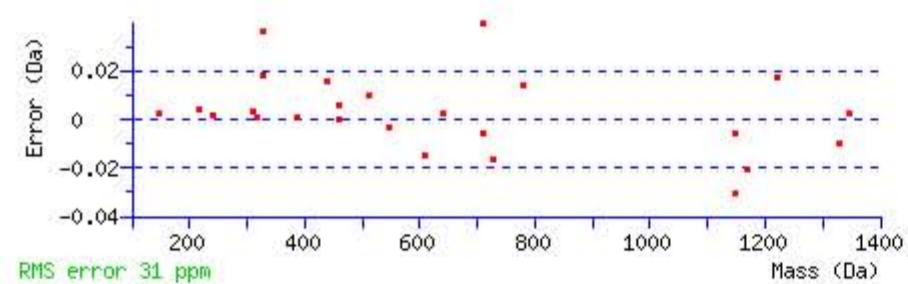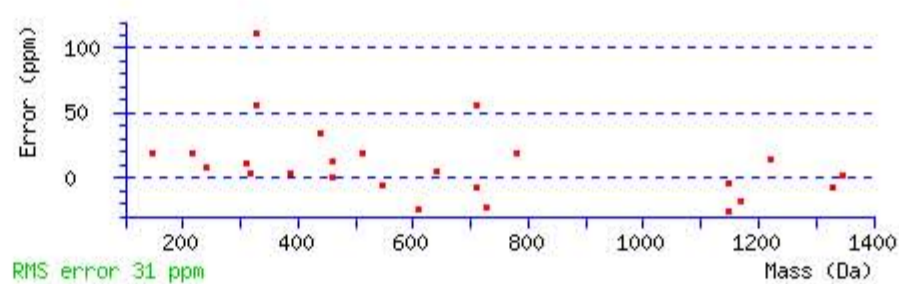

NCBI BLAST search of **EKAEAQAQYSAAVAK**

(Parameters: blastp, nr protein database, expect=20000, no filter, PAM30)

Other BLAST [web gateways](#)

All matches to this query

| Score | Mr(calc):   | Delta     | Sequence                        |
|-------|-------------|-----------|---------------------------------|
| 55.1  | 1874.955978 | -0.008436 | <a href="#">EKAEAQAQYSAAVAK</a> |
| 38.8  | 1874.955978 | -0.008436 | <a href="#">EKAEAQAQYSAAVAK</a> |

Mascot: <http://www.matrixscience.com/>

# MASCOT SEARCH RESULTS

## Peptide View

MS/MS Fragmentation of **EKAEAAQYSAAVAK**

Found in **ITIH4\_HUMAN**, Inter-alpha-trypsin inhibitor heavy chain H4 OS=Homo sapiens GN=ITIH4 PE=1 SV=4

Match to Query 37131: 1874.966622 from(625.996150,3+) rtinseconds(1547) index(2323)

Title: Locus:1.1.1.3058.5 File:"2013-07-02 CLN FXIII 180 min 3rd F 1.wiff"

Data file C:\Program Files (x86)\Matrix Science\Mascot Daemon\mgf9 FXIII 180 min 3rd\mascot\_daemon\_merge.mgf

Click mouse within plot area to zoom in by factor of two about that point

Or, Plot from  to  Da

Label all possible matches  Label matches used for scoring

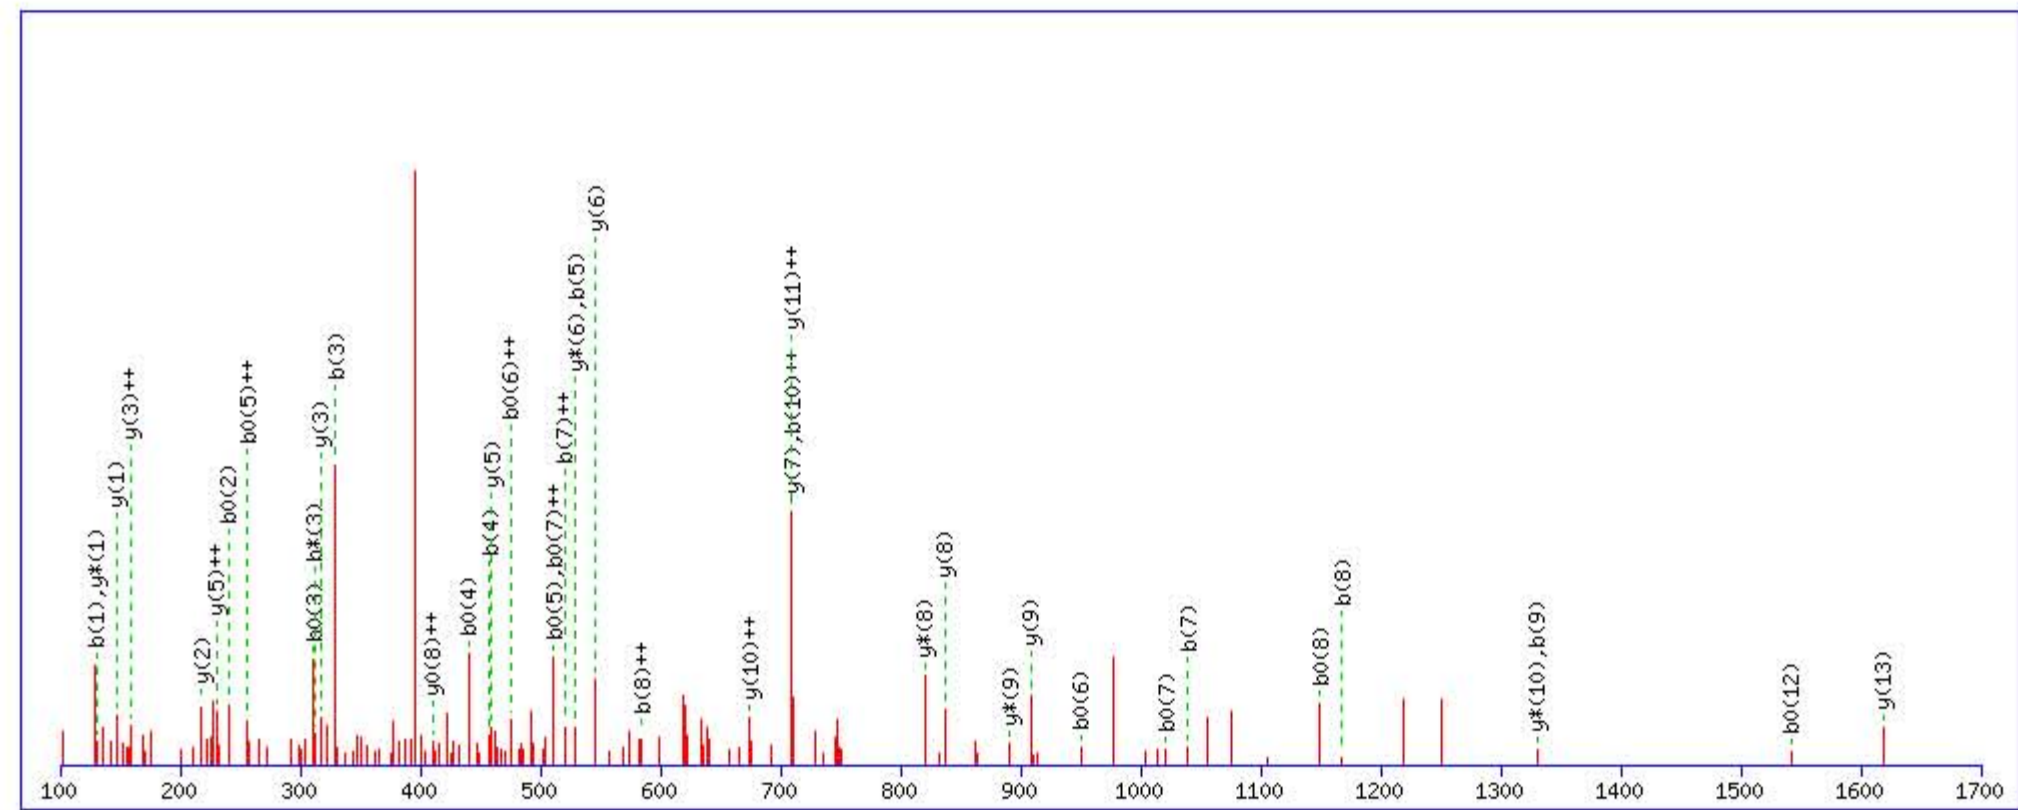

Monoisotopic mass of neutral peptide Mr(calc): 1874.955978

Fixed modifications: Carbamidomethyl (C) (apply to specified residues or termini only)

Variable modifications:

Q6 : Biotin:Thermo-21345 (Q)

Ions Score: 43 Expect: 0.0013

Matches : 41/156 fragment ions using 82 most intense peaks [\(help\)](#)

| #  | b                  | b <sup>++</sup>   | b <sup>*</sup>    | b <sup>*++</sup> | b <sup>0</sup>     | b <sup>0++</sup>  | Seq. | y                  | y <sup>++</sup>   | y <sup>*</sup>     | y <sup>*++</sup> | y <sup>0</sup> | y <sup>0++</sup>  | #  |
|----|--------------------|-------------------|-------------------|------------------|--------------------|-------------------|------|--------------------|-------------------|--------------------|------------------|----------------|-------------------|----|
| 1  | <b>130.049869</b>  | 65.528572         |                   |                  | 112.039304         | 56.523290         | E    |                    |                   |                    |                  |                |                   | 15 |
| 2  | 258.144832         | 129.576054        | 241.118283        | 121.062780       | <b>240.134267</b>  | 120.570772        | K    | 1746.920719        | 873.963998        | 1729.894170        | 865.450723       | 1728.910154    | 864.958715        | 14 |
| 3  | <b>329.181946</b>  | 165.094611        | <b>312.155397</b> | 156.581336       | <b>311.171381</b>  | 156.089328        | A    | <b>1618.825756</b> | 809.916516        | 1601.799207        | 801.403242       | 1600.815191    | 800.911233        | 13 |
| 4  | <b>458.224539</b>  | 229.615907        | 441.197990        | 221.102633       | <b>440.213974</b>  | 220.610625        | E    | 1547.788642        | 774.397959        | 1530.762093        | 765.884685       | 1529.778077    | 765.392677        | 12 |
| 5  | <b>529.261653</b>  | 265.134465        | 512.235104        | 256.621190       | <b>511.251088</b>  | <b>256.129182</b> | A    | 1418.746049        | <b>709.876663</b> | 1401.719500        | 701.363388       | 1400.735484    | 700.871380        | 11 |
| 6  | 968.486979         | 484.747128        | 951.460430        | 476.233853       | <b>950.476414</b>  | <b>475.741845</b> | Q    | 1347.708935        | <b>674.358106</b> | <b>1330.682386</b> | 665.844831       | 1329.698370    | 665.352823        | 10 |
| 7  | <b>1039.524093</b> | <b>520.265685</b> | 1022.497544       | 511.752410       | <b>1021.513528</b> | <b>511.260402</b> | A    | <b>908.483609</b>  | 454.745443        | <b>891.457060</b>  | 446.232168       | 890.473044     | 445.740160        | 9  |
| 8  | <b>1167.582671</b> | <b>584.294973</b> | 1150.556122       | 575.781699       | <b>1149.572106</b> | 575.289691        | Q    | <b>837.446495</b>  | 419.226886        | <b>820.419946</b>  | 410.713611       | 819.435930     | <b>410.221603</b> | 8  |
| 9  | <b>1330.646000</b> | 665.826638        | 1313.619451       | 657.313364       | 1312.635435        | 656.821355        | Y    | <b>709.387917</b>  | 355.197597        | 692.361368         | 346.684322       | 691.377352     | 346.192314        | 7  |
| 10 | 1417.678028        | <b>709.342652</b> | 1400.651479       | 700.829378       | 1399.667463        | 700.337370        | S    | <b>546.324588</b>  | 273.665932        | <b>529.298039</b>  | 265.152658       | 528.314023     | 264.660650        | 6  |
| 11 | 1488.715142        | 744.861209        | 1471.688593       | 736.347935       | 1470.704577        | 735.855927        | A    | <b>459.292560</b>  | <b>230.149918</b> | 442.266011         | 221.636643       |                |                   | 5  |
| 12 | 1559.752256        | 780.379766        | 1542.725707       | 771.866492       | <b>1541.741691</b> | 771.374484        | A    | 388.255446         | 194.631361        | 371.228897         | 186.118087       |                |                   | 4  |
| 13 | 1658.820670        | 829.913973        | 1641.794121       | 821.400699       | 1640.810105        | 820.908691        | V    | <b>317.218332</b>  | <b>159.112804</b> | 300.191783         | 150.599530       |                |                   | 3  |
| 14 | 1729.857784        | 865.432530        | 1712.831235       | 856.919256       | 1711.847219        | 856.427248        | A    | <b>218.149918</b>  | 109.578597        | 201.123369         | 101.065322       |                |                   | 2  |
| 15 |                    |                   |                   |                  |                    |                   | K    | <b>147.112804</b>  | 74.060040         | <b>130.086255</b>  | 65.546765        |                |                   | 1  |

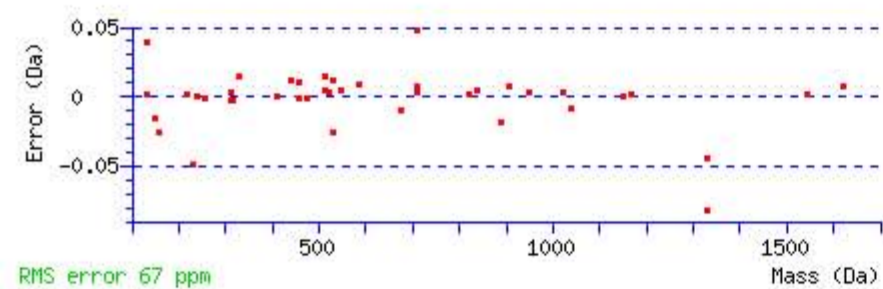

RMS error 67 ppm

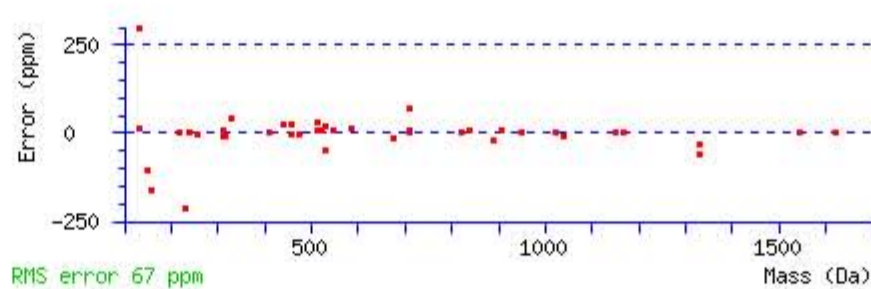

RMS error 67 ppm

NCBI BLAST search of [EKAEAAQYSAAVAK](#)

(Parameters: blastp, nr protein database, expect=20000, no filter, PAM30)

Other BLAST [web gateways](#)

All matches to this query

| Score | Mr(calc):   | Delta    | Sequence                       |
|-------|-------------|----------|--------------------------------|
| 43.0  | 1874.955978 | 0.010644 | <a href="#">EKAEAAQYSAAVAK</a> |
| 38.5  | 1874.955978 | 0.010644 | <a href="#">EKAEAAQYSAAVAK</a> |

Mascot: <http://www.matrixscience.com/>

# Mascot Search Results

## Peptide View

### MS/MS Fragmentation of **SPEQQETVLDGNLIIR**

Found in **ITIH4\_HUMAN**, Inter-alpha-trypsin inhibitor heavy chain H4 OS=Homo sapiens GN=ITIH4 PE=1 SV=4

Match to Query 41897: 2122.128102 from(708.383310,3+) rtinseconds(2416) index(7144)

Title: Locus:1.1.1.3361.20 File:"2013-07-02 CLN FXIII 180 min 3rd F 1.wiff"

Data file C:\Program Files (x86)\Matrix Science\Mascot Daemon\mgf\9 FXIII 180 min 3rd\mascot\_daemon\_merge.mgf

Click mouse within plot area to zoom in by factor of two about that point

Or, Plot from  to  Da

Label all possible matches  Label matches used for scoring

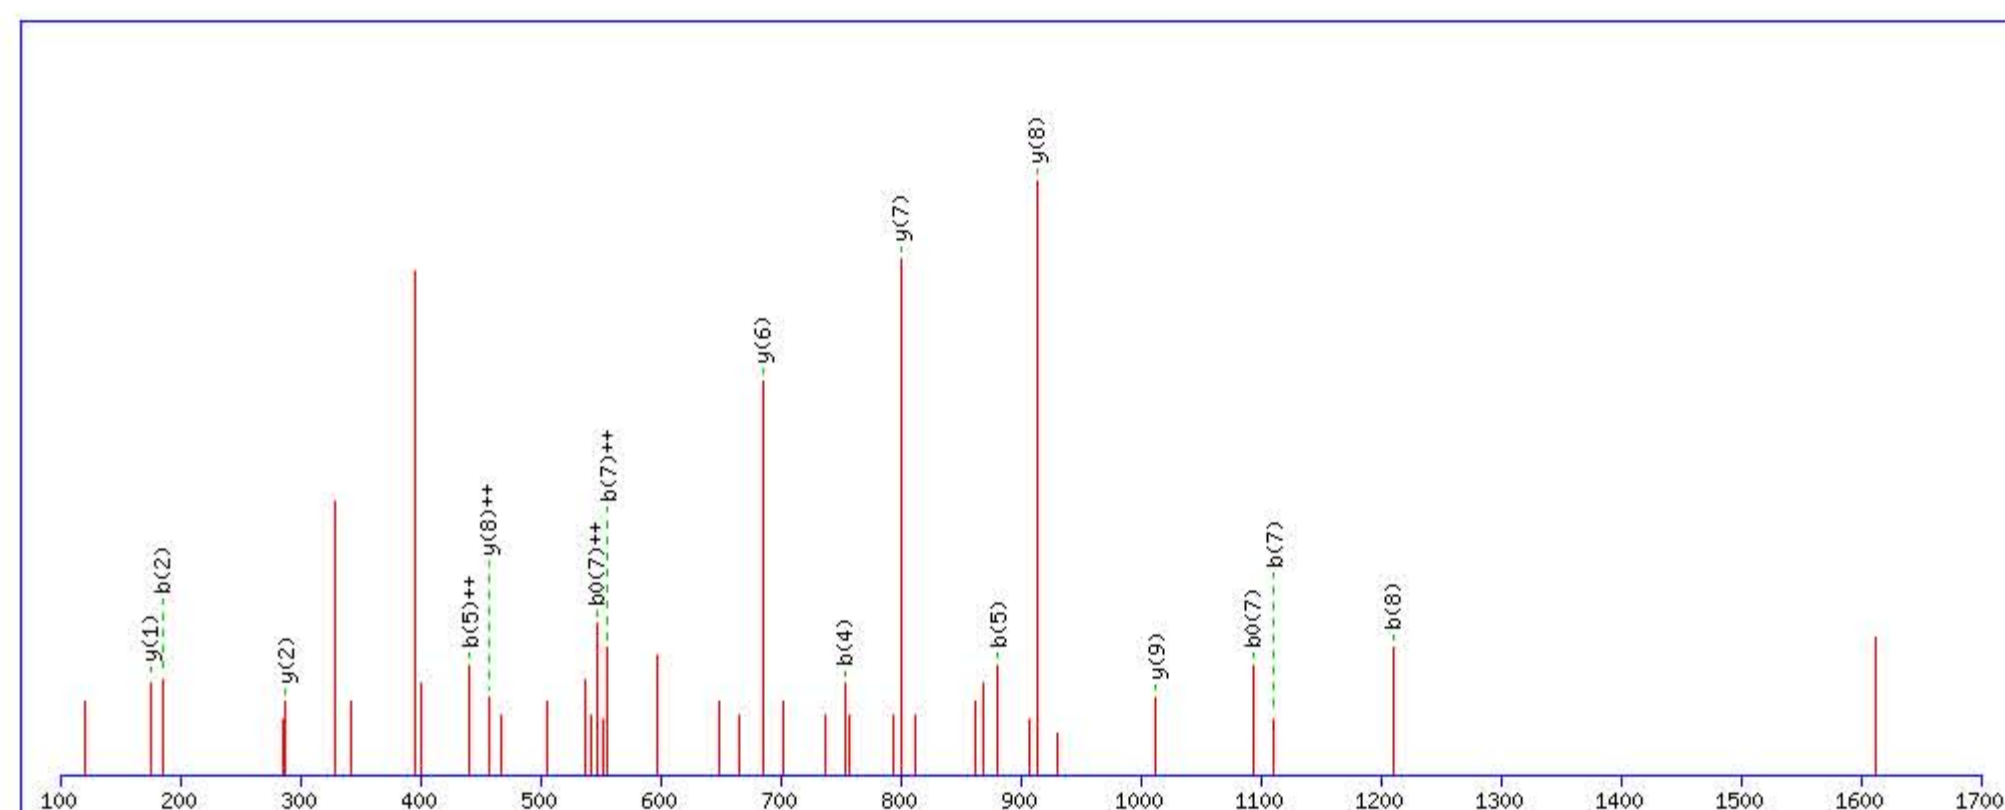

Monoisotopic mass of neutral peptide  $M_r(\text{calc})$ : 2122.109222

Fixed modifications: Carbamidomethyl (C) (apply to specified residues or termini only)

Variable modifications:

Q4 : Biotin:Thermo-21345 (Q)

Ions Score: 43 Expect: 0.00025

Matches : 16/162 fragment ions using 22 most intense peaks [\(help\)](#)

| #  | b                  | b <sup>++</sup>   | b <sup>*</sup> | b <sup>+++</sup> | b <sup>0</sup>     | b <sup>0++</sup>  | Seq. | y                  | y <sup>++</sup>   | y <sup>*</sup> | y <sup>+++</sup> | y <sup>0</sup> | y <sup>0++</sup> | #  |
|----|--------------------|-------------------|----------------|------------------|--------------------|-------------------|------|--------------------|-------------------|----------------|------------------|----------------|------------------|----|
| 1  | 88.039304          | 44.523290         |                |                  | 70.028739          | 35.518008         | S    |                    |                   |                |                  |                |                  | 16 |
| 2  | <b>185.092068</b>  | 93.049672         |                |                  | 167.081503         | 84.044389         | P    | 2036.084489        | 1018.545882       | 2019.057940    | 1010.032608      | 2018.073924    | 1009.540600      | 15 |
| 3  | 314.134661         | 157.570968        |                |                  | 296.124096         | 148.565686        | E    | 1939.031725        | 970.019500        | 1922.005176    | 961.506226       | 1921.021160    | 961.014218       | 14 |
| 4  | <b>753.359987</b>  | 377.183632        | 736.333438     | 368.670357       | 735.349422         | 368.178349        | Q    | 1809.989132        | 905.498204        | 1792.962583    | 896.984929       | 1791.978567    | 896.492921       | 13 |
| 5  | <b>881.418565</b>  | <b>441.212921</b> | 864.392016     | 432.699646       | 863.408000         | 432.207638        | Q    | 1370.763806        | 685.885541        | 1353.737257    | 677.372266       | 1352.753241    | 676.880258       | 12 |
| 6  | 1010.461158        | 505.734217        | 993.434609     | 497.220943       | 992.450593         | 496.728935        | E    | 1242.705228        | 621.856252        | 1225.678679    | 613.342977       | 1224.694663    | 612.850969       | 11 |
| 7  | <b>1111.508837</b> | <b>556.258057</b> | 1094.482288    | 547.744782       | <b>1093.498272</b> | <b>547.252774</b> | T    | 1113.662635        | 557.334955        | 1096.636086    | 548.821681       | 1095.652070    | 548.329673       | 10 |
| 8  | <b>1210.577251</b> | 605.792264        | 1193.550702    | 597.278989       | 1192.566686        | 596.786981        | V    | <b>1012.614956</b> | 506.811116        | 995.588407     | 498.297841       | 994.604391     | 497.805833       | 9  |
| 9  | 1323.661315        | 662.334296        | 1306.634766    | 653.821021       | 1305.650750        | 653.329013        | L    | <b>913.546542</b>  | <b>457.276909</b> | 896.519993     | 448.763634       | 895.535977     | 448.271626       | 8  |
| 10 | 1438.688258        | 719.847767        | 1421.661709    | 711.334493       | 1420.677693        | 710.842485        | D    | <b>800.462478</b>  | 400.734877        | 783.435929     | 392.221602       | 782.451913     | 391.729594       | 7  |
| 11 | 1495.709722        | 748.358499        | 1478.683173    | 739.845225       | 1477.699157        | 739.353217        | G    | <b>685.435535</b>  | 343.221405        | 668.408986     | 334.708131       |                |                  | 6  |
| 12 | 1609.752649        | 805.379963        | 1592.726100    | 796.866688       | 1591.742084        | 796.374680        | N    | 628.414071         | 314.710673        | 611.387522     | 306.197399       |                |                  | 5  |
| 13 | 1722.836713        | 861.921994        | 1705.810164    | 853.408720       | 1704.826148        | 852.916712        | L    | 514.371144         | 257.689210        | 497.344595     | 249.175935       |                |                  | 4  |
| 14 | 1835.920777        | 918.464026        | 1818.894228    | 909.950752       | 1817.910212        | 909.458744        | I    | 401.287080         | 201.147178        | 384.260531     | 192.633903       |                |                  | 3  |
| 15 | 1949.004841        | 975.006058        | 1931.978292    | 966.492784       | 1930.994276        | 966.000776        | I    | <b>288.203016</b>  | 144.605146        | 271.176467     | 136.091871       |                |                  | 2  |
| 16 |                    |                   |                |                  |                    |                   | R    | <b>175.118952</b>  | 88.063114         | 158.092403     | 79.549839        |                |                  | 1  |

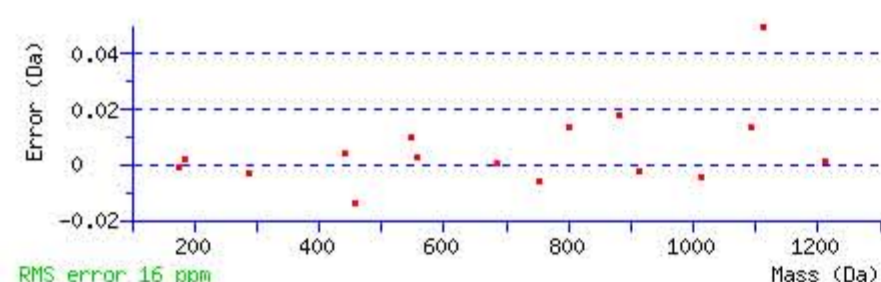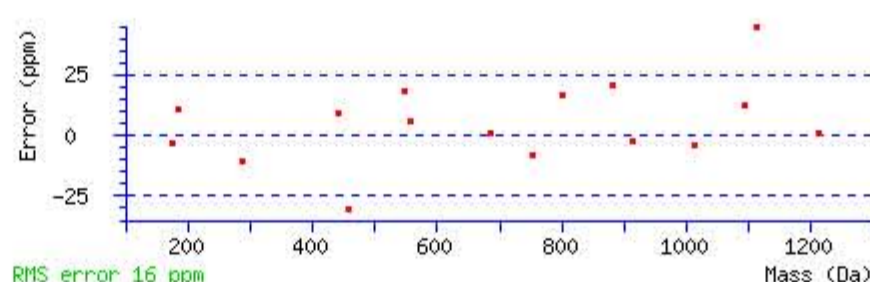

### NCBI BLAST search of **SPEQQETVLDGNLIIR**

(Parameters: blastp, nr protein database, expect=20000, no filter, PAM30)

Other BLAST [web gateways](#)

### All matches to this query

| Score | $M_r(\text{calc})$ : | Delta     | Sequence                           |
|-------|----------------------|-----------|------------------------------------|
| 43.3  | 2122.109222          | 0.018880  | <a href="#">SPEQQETVLDGNLIIR</a>   |
| 34.9  | 2122.109222          | 0.018880  | <a href="#">SPEQQETVLDGNLIIR</a>   |
| 4.6   | 2122.099350          | 0.028752  | <a href="#">IDLAVGDVVKTWRFNMR</a>  |
| 4.2   | 2122.100189          | 0.027913  | <a href="#">MIAPQRWIDAQR</a>       |
| 4.1   | 2122.139053          | -0.010951 | <a href="#">RRVYDALNVLAMNIISK</a>  |
| 4.1   | 2122.139053          | -0.010951 | <a href="#">RRVYDALNVLAMNIISK</a>  |
| 2.1   | 2122.135742          | -0.007640 | <a href="#">TQVSLTAVWIGAQQQR</a>   |
| 1.9   | 2122.120453          | 0.007649  | <a href="#">TELLPGDRDNLAIQTR</a>   |
| 1.5   | 2122.149612          | -0.021510 | <a href="#">LPALRLMNATITEELFFK</a> |
| 0.7   | 2122.100204          | 0.027898  | <a href="#">QQGQCLLLWQAR</a>       |

**Peptide View**

MS/MS Fragmentation of **QLGLPGPPDVPDHAAYHPFR**

Found in **ITIH4\_HUMAN**, Inter-alpha-trypsin inhibitor heavy chain H4 OS=Homo sapiens GN=ITIH4 PE=1 SV=4

Match to Query 48392: 2494.244896 from(624.568500,4+) rtinseconds(2175) index(20073)  
 Title: Locus:1.1.1.3323.13 File:"2013-07-02 CLN FXIII 180 min 3rd F 2.wiff"  
 Data file C:\Program Files (x86)\Matrix Science\Mascot Daemon\mgf9 FXIII 180 min 3rd\mascot\_daemon\_merge.mgf

Click mouse within plot area to zoom in by factor of two about that point  
 Or, Plot from  to  Da   
 Label all possible matches  Label matches used for scoring

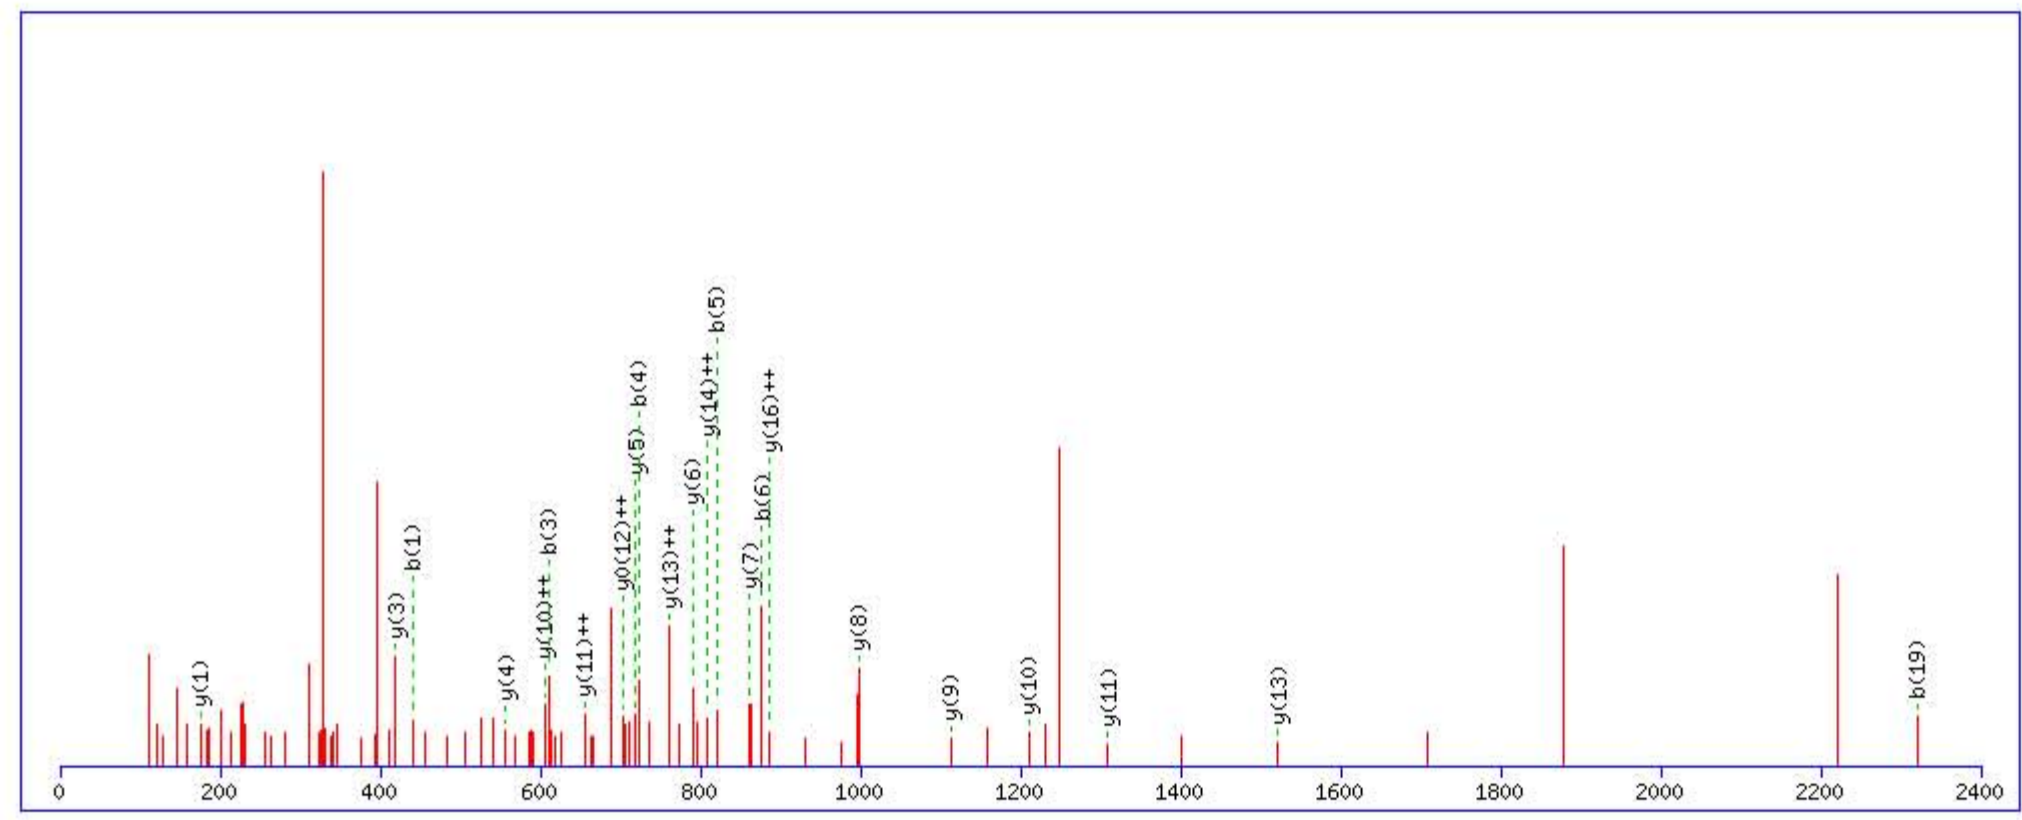

Monoisotopic mass of neutral peptide Mr(calc): 2494.257980  
 Fixed modifications: Carbamidomethyl (C) (apply to specified residues or termini only)  
 Variable modifications:  
 Q1 : Biotin:Thermo-21345 (Q)  
 Ions Score: 50 Expect: 2.3e-005  
 Matches : 23/196 fragment ions using 58 most intense peaks ([help](#))

| #  | b                  | b <sup>++</sup> | b <sup>*</sup> | b <sup>*++</sup> | b <sup>0</sup> | b <sup>0++</sup> | Seq. | y                  | y <sup>++</sup>   | y <sup>*</sup> | y <sup>*++</sup> | y <sup>0</sup> | y <sup>0++</sup>  | #  |
|----|--------------------|-----------------|----------------|------------------|----------------|------------------|------|--------------------|-------------------|----------------|------------------|----------------|-------------------|----|
| 1  | <b>440.232602</b>  | 220.619939      | 423.206053     | 212.106664       |                |                  | Q    |                    |                   |                |                  |                |                   | 20 |
| 2  | 553.316666         | 277.161971      | 536.290117     | 268.648697       |                |                  | L    | 2056.039923        | 1028.523599       | 2039.013374    | 1020.010325      | 2038.029358    | 1019.518317       | 19 |
| 3  | <b>610.338130</b>  | 305.672703      | 593.311581     | 297.159429       |                |                  | G    | 1942.955859        | 971.981568        | 1925.929310    | 963.468293       | 1924.945294    | 962.976285        | 18 |
| 4  | <b>723.422194</b>  | 362.214735      | 706.395645     | 353.701461       |                |                  | L    | 1885.934395        | 943.470836        | 1868.907846    | 934.957561       | 1867.923830    | 934.465553        | 17 |
| 5  | <b>820.474958</b>  | 410.741117      | 803.448409     | 402.227843       |                |                  | P    | 1772.850331        | <b>886.928804</b> | 1755.823782    | 878.415529       | 1754.839766    | 877.923521        | 16 |
| 6  | <b>877.496422</b>  | 439.251849      | 860.469873     | 430.738575       |                |                  | G    | 1675.797567        | 838.402422        | 1658.771018    | 829.889147       | 1657.787002    | 829.397139        | 15 |
| 7  | 974.549186         | 487.778231      | 957.522637     | 479.264957       |                |                  | P    | 1618.776103        | <b>809.891690</b> | 1601.749554    | 801.378415       | 1600.765538    | 800.886407        | 14 |
| 8  | 1071.601950        | 536.304613      | 1054.575401    | 527.791339       |                |                  | P    | <b>1521.723339</b> | <b>761.365308</b> | 1504.696790    | 752.852033       | 1503.712774    | 752.360025        | 13 |
| 9  | 1186.628893        | 593.818085      | 1169.602344    | 585.304810       | 1168.618328    | 584.812802       | D    | 1424.670575        | 712.838926        | 1407.644026    | 704.325651       | 1406.660010    | <b>703.833643</b> | 12 |
| 10 | 1285.697307        | 643.352292      | 1268.670758    | 634.839017       | 1267.686742    | 634.347009       | V    | <b>1309.643632</b> | <b>655.325454</b> | 1292.617083    | 646.812180       | 1291.633067    | 646.320172        | 11 |
| 11 | 1382.750071        | 691.878674      | 1365.723522    | 683.365399       | 1364.739506    | 682.873391       | P    | <b>1210.575218</b> | <b>605.791247</b> | 1193.548669    | 597.277973       | 1192.564653    | 596.785964        | 10 |
| 12 | 1497.777014        | 749.392145      | 1480.750465    | 740.878871       | 1479.766449    | 740.386863       | D    | <b>1113.522454</b> | 557.264865        | 1096.495905    | 548.751591       | 1095.511889    | 548.259582        | 9  |
| 13 | 1634.835926        | 817.921601      | 1617.809377    | 809.408327       | 1616.825361    | 808.916319       | H    | <b>998.495511</b>  | 499.751393        | 981.468962     | 491.238119       |                |                   | 8  |
| 14 | 1705.873040        | 853.440158      | 1688.846491    | 844.926884       | 1687.862475    | 844.434876       | A    | <b>861.436599</b>  | 431.221937        | 844.410050     | 422.708663       |                |                   | 7  |
| 15 | 1776.910154        | 888.958715      | 1759.883605    | 880.445441       | 1758.899589    | 879.953433       | A    | <b>790.399485</b>  | 395.703380        | 773.372936     | 387.190106       |                |                   | 6  |
| 16 | 1939.973483        | 970.490380      | 1922.946934    | 961.977105       | 1921.962918    | 961.485097       | Y    | <b>719.362371</b>  | 360.184823        | 702.335822     | 351.671549       |                |                   | 5  |
| 17 | 2077.032395        | 1039.019836     | 2060.005846    | 1030.506561      | 2059.021830    | 1030.014553      | H    | <b>556.299042</b>  | 278.653159        | 539.272493     | 270.139884       |                |                   | 4  |
| 18 | 2174.085159        | 1087.546218     | 2157.058610    | 1079.032943      | 2156.074594    | 1078.540935      | P    | <b>419.240130</b>  | 210.123703        | 402.213581     | 201.610428       |                |                   | 3  |
| 19 | <b>2321.153573</b> | 1161.080424     | 2304.127024    | 1152.567150      | 2303.143008    | 1152.075142      | F    | 322.187366         | 161.597321        | 305.160817     | 153.084046       |                |                   | 2  |
| 20 |                    |                 |                |                  |                |                  | R    | <b>175.118952</b>  | 88.063114         | 158.092403     | 79.549839        |                |                   | 1  |

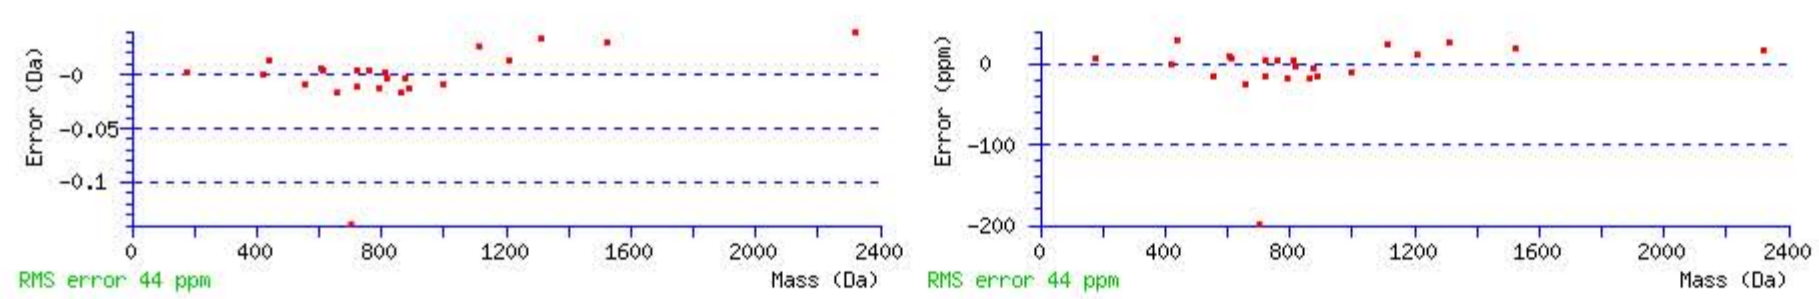

NCBI BLAST search of **QLGLPGPPDVPDHAAYHPFR**  
 (Parameters: blastp, nr protein database, expect=20000, no filter, PAM30)  
 Other BLAST [web gateways](#)

**All matches to this query**

| Score | Mr(calc):   | Delta     | Sequence                               |
|-------|-------------|-----------|----------------------------------------|
| 49.9  | 2494.257980 | -0.013084 | <a href="#">QLGLPGPPDVPDHAAYHPFR</a>   |
| 0.6   | 2494.270370 | -0.025474 | <a href="#">LLEVSDDPQVLAVAHDVGEYVR</a> |

# MASCOT Search Results

## Peptide View

MS/MS Fragmentation of **QVILTLQPTLVAVGK**

Found in **ICAM2\_HUMAN**, Intercellular adhesion molecule 2 OS=Homo sapiens GN=ICAM2 PE=1 SV=2

Match to Query 37285: 1890.157448 from(946.086000,2+) rtinseconds(2684) index(8620)

Title: Locus:1.1.1.3454.7 File:"2013-07-02 CLN FXIII 180 min 3rd F 1.wiff"

Data file C:\Program Files (x86)\Matrix Science\Mascot Daemon\mgf9 FXIII 180 min 3rd\mascot\_daemon\_merge.mgf

Click mouse within plot area to zoom in by factor of two about that point

Or, Plot from  to  Da

Label all possible matches  Label matches used for scoring

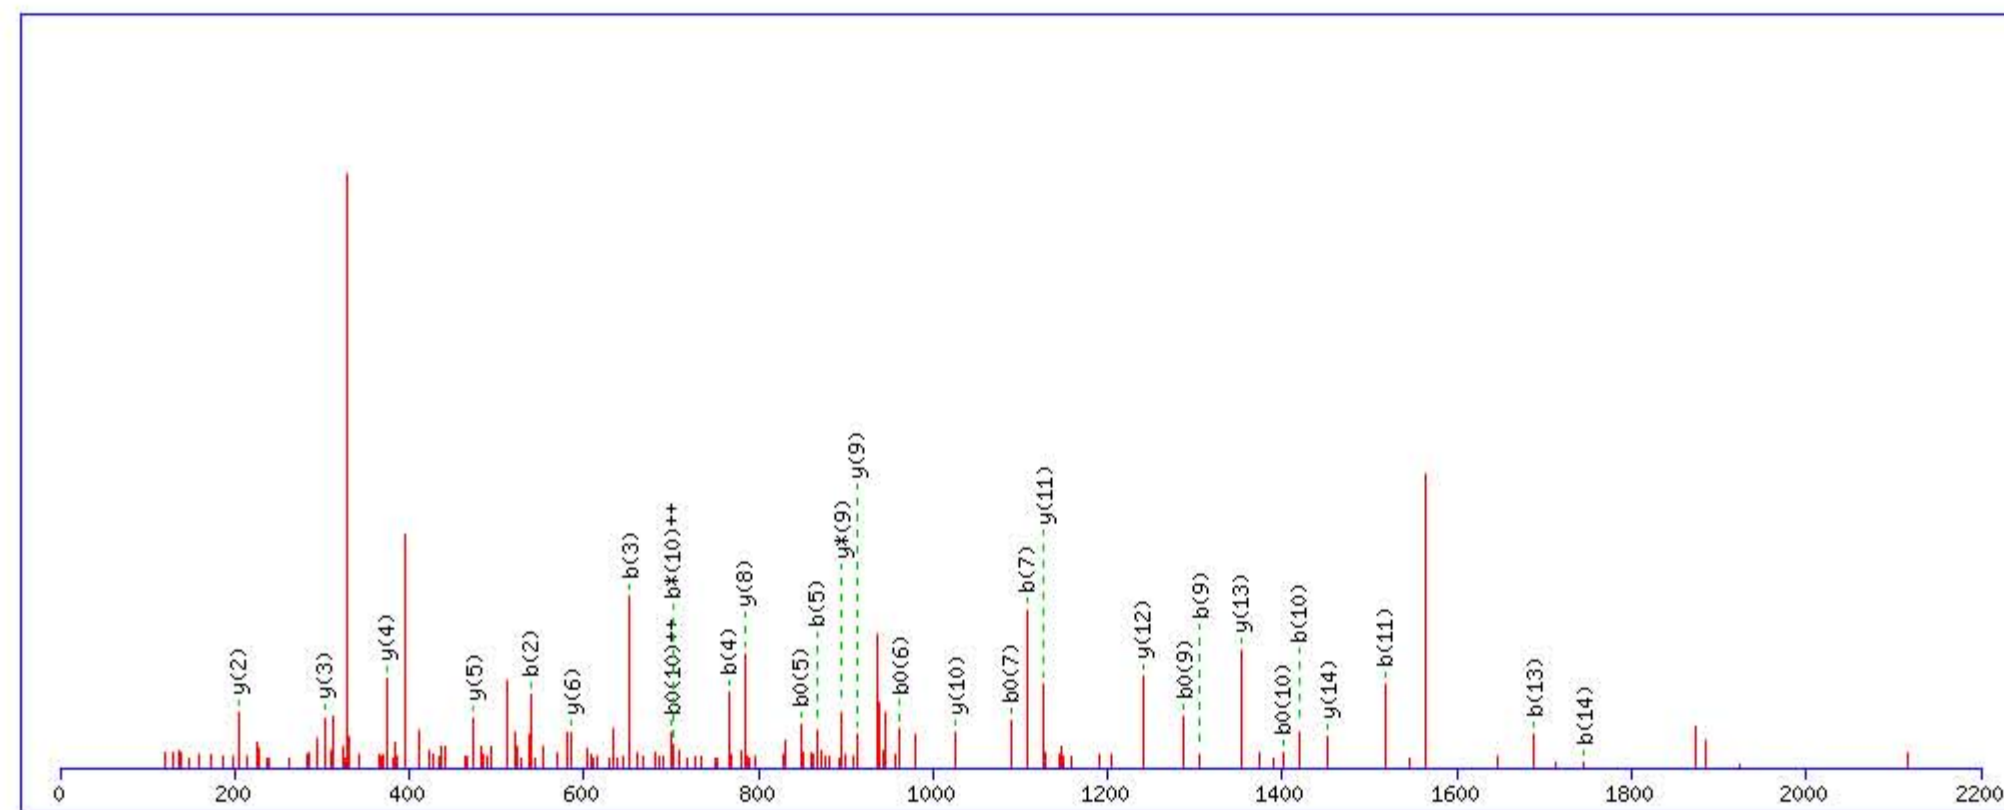

Monoisotopic mass of neutral peptide Mr(calc): 1890.137634

Fixed modifications: Carbamidomethyl (C) (apply to specified residues or termini only)

Variable modifications:

Q1 : Biotin:Thermo-21345 (Q)

Ions Score: 71 Expect: 8.8e-008

Matches : 30/148 fragment ions using 61 most intense peaks [\(help\)](#)

| #  | b           | b <sup>++</sup> | b <sup>*</sup> | b <sup>*++</sup> | b <sup>0</sup> | b <sup>0++</sup> | Seq. | y           | y <sup>++</sup> | y <sup>*</sup> | y <sup>*++</sup> | y <sup>0</sup> | y <sup>0++</sup> | #  |
|----|-------------|-----------------|----------------|------------------|----------------|------------------|------|-------------|-----------------|----------------|------------------|----------------|------------------|----|
| 1  | 440.232602  | 220.619939      | 423.206053     | 212.106664       |                |                  | Q    |             |                 |                |                  |                |                  | 15 |
| 2  | 539.301016  | 270.154146      | 522.274467     | 261.640872       |                |                  | V    | 1451.919580 | 726.463428      | 1434.893031    | 717.950154       | 1433.909015    | 717.458146       | 14 |
| 3  | 652.385080  | 326.696178      | 635.358531     | 318.182904       |                |                  | I    | 1352.851166 | 676.929221      | 1335.824617    | 668.415947       | 1334.840601    | 667.923939       | 13 |
| 4  | 765.469144  | 383.238210      | 748.442595     | 374.724936       |                |                  | L    | 1239.767102 | 620.387189      | 1222.740553    | 611.873915       | 1221.756537    | 611.381907       | 12 |
| 5  | 866.516823  | 433.762050      | 849.490274     | 425.248775       | 848.506258     | 424.756767       | T    | 1126.683038 | 563.845157      | 1109.656489    | 555.331883       | 1108.672473    | 554.839874       | 11 |
| 6  | 979.600887  | 490.304082      | 962.574338     | 481.790807       | 961.590322     | 481.298799       | L    | 1025.635359 | 513.321318      | 1008.608810    | 504.808043       | 1007.624794    | 504.316035       | 10 |
| 7  | 1107.659465 | 554.333371      | 1090.632916    | 545.820096       | 1089.648900    | 545.328088       | Q    | 912.551295  | 456.779286      | 895.524746     | 448.266011       | 894.540730     | 447.774003       | 9  |
| 8  | 1204.712229 | 602.859753      | 1187.685680    | 594.346478       | 1186.701664    | 593.854470       | P    | 784.492717  | 392.749997      | 767.466168     | 384.236722       | 766.482152     | 383.744714       | 8  |
| 9  | 1305.759908 | 653.383592      | 1288.733359    | 644.870318       | 1287.749343    | 644.378310       | T    | 687.439953  | 344.223615      | 670.413404     | 335.710340       | 669.429388     | 335.218332       | 7  |
| 10 | 1418.843972 | 709.925624      | 1401.817423    | 701.412350       | 1400.833407    | 700.920341       | L    | 586.392274  | 293.699775      | 569.365725     | 285.186501       |                |                  | 6  |
| 11 | 1517.912386 | 759.459831      | 1500.885837    | 750.946557       | 1499.901821    | 750.454548       | V    | 473.308210  | 237.157743      | 456.281661     | 228.644469       |                |                  | 5  |
| 12 | 1588.949500 | 794.978388      | 1571.922951    | 786.465114       | 1570.938935    | 785.973105       | A    | 374.239796  | 187.623536      | 357.213247     | 179.110261       |                |                  | 4  |
| 13 | 1688.017914 | 844.512595      | 1670.991365    | 835.999321       | 1670.007349    | 835.507313       | V    | 303.202682  | 152.104979      | 286.176133     | 143.591704       |                |                  | 3  |
| 14 | 1745.039378 | 873.023327      | 1728.012829    | 864.510053       | 1727.028813    | 864.018044       | G    | 204.134268  | 102.570772      | 187.107719     | 94.057497        |                |                  | 2  |
| 15 |             |                 |                |                  |                |                  | K    | 147.112804  | 74.060040       | 130.086255     | 65.546765        |                |                  | 1  |

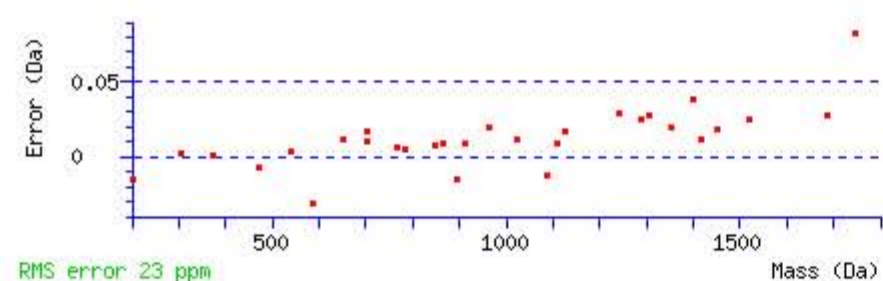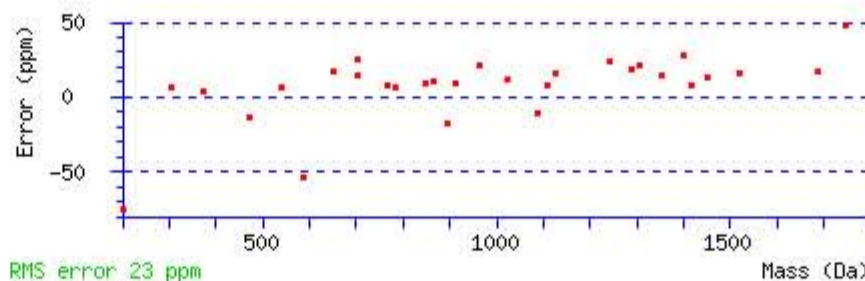

NCBI BLAST search of **QVILTLQPTLVAVGK**

(Parameters: blastp, nr protein database, expect=20000, no filter, PAM30)

Other BLAST [web gateways](#)

All matches to this query

| Score | Mr(calc):   | Delta    | Sequence                        |
|-------|-------------|----------|---------------------------------|
| 70.6  | 1890.137634 | 0.019814 | <a href="#">QVILTLQPTLVAVGK</a> |
| 15.6  | 1890.137634 | 0.019814 | <a href="#">QVILTLQPTLVAVGK</a> |

Mascot: <http://www.matrixscience.com/>

# MASCOT Search Results

## Peptide View

MS/MS Fragmentation of **QVVAGLNFR**

Found in **KNG1\_HUMAN**, Kininogen-1 OS=Homo sapiens GN=KNG1 PE=1 SV=2

Match to Query 20595: 1313.729408 from(657.871980,2+) rtinseconds(2233) index(20403)

Title: Locus:1.1.1.3343.12 File:"2013-07-02 CLN FXIII 180 min 3rd F 2.wiff"

Data file C:\Program Files (x86)\Matrix Science\Mascot Daemon\mgf9 FXIII 180 min 3rd\mascot\_daemon\_merge.mgf

Click mouse within plot area to zoom in by factor of two about that point

Or, Plot from  to  Da

Label all possible matches  Label matches used for scoring

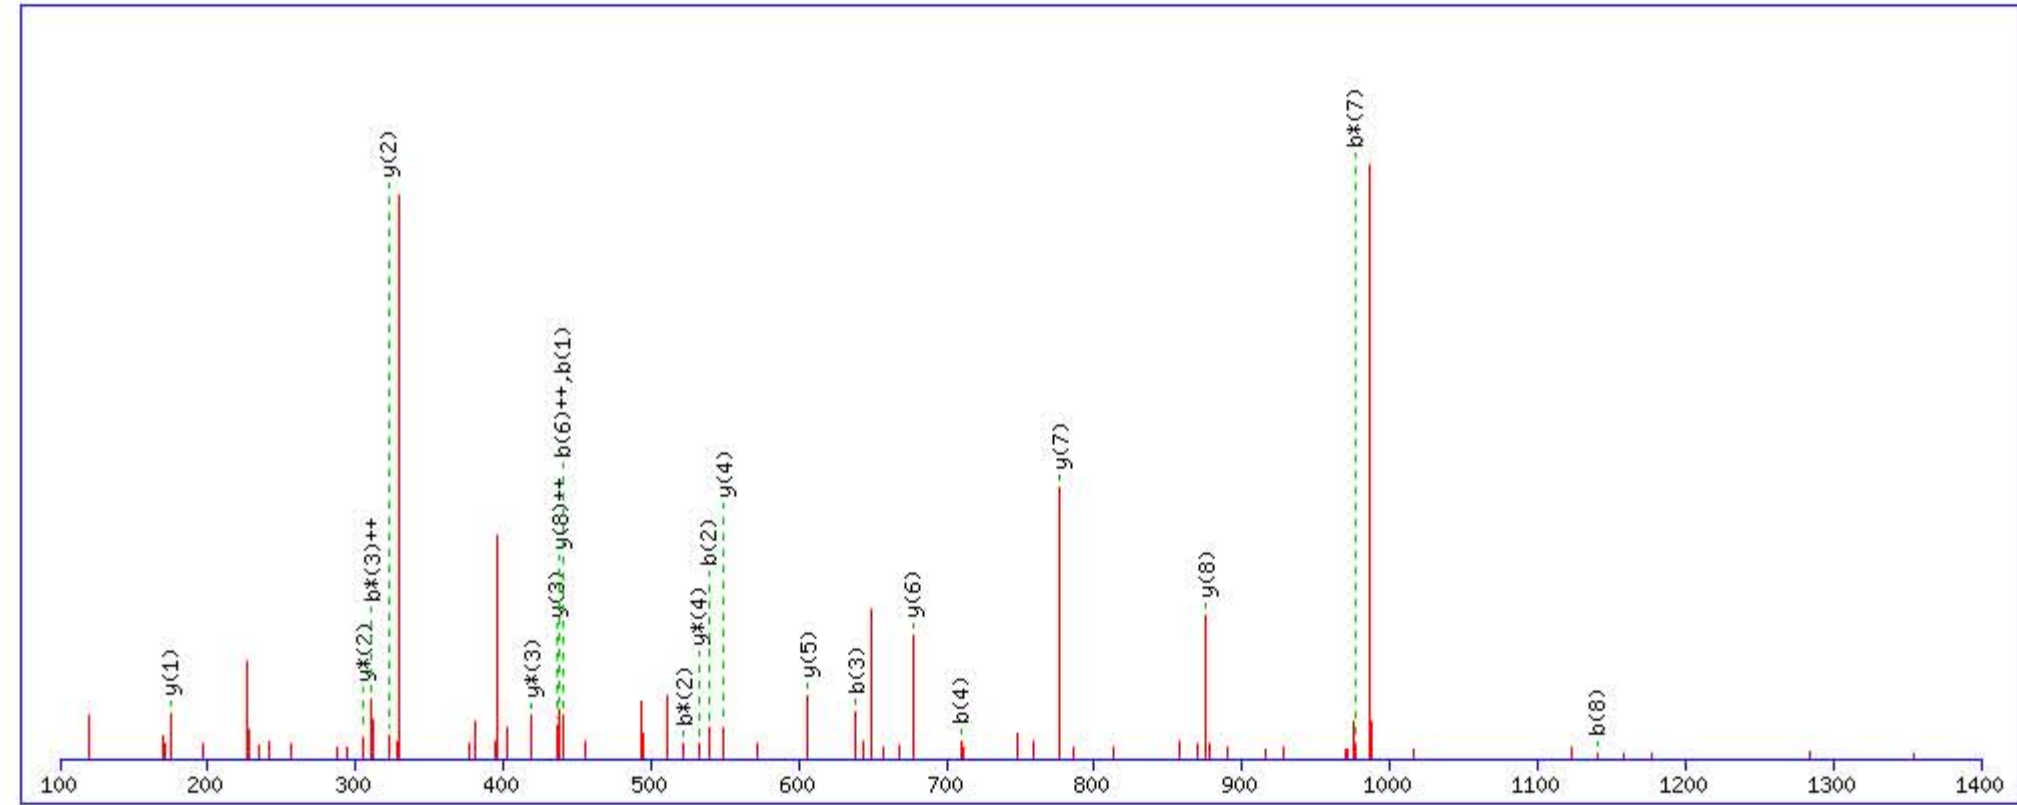

Monoisotopic mass of neutral peptide Mr(calc): 1313.727814

Fixed modifications: Carbamidomethyl (C) (apply to specified residues or termini only)

Variable modifications:

Q1 : Biotin:Thermo-21345 (Q)

Ions Score: 28 Expect: 0.007

Matches : 21/64 fragment ions using 64 most intense peaks [\(help\)](#)

| # | b           | b <sup>++</sup> | b <sup>*</sup> | b <sup>*++</sup> | Seq. | y          | y <sup>++</sup> | y <sup>*</sup> | y <sup>*++</sup> | # |
|---|-------------|-----------------|----------------|------------------|------|------------|-----------------|----------------|------------------|---|
| 1 | 440.232602  | 220.619939      | 423.206053     | 212.106664       | Q    |            |                 |                |                  | 9 |
| 2 | 539.301016  | 270.154146      | 522.274467     | 261.640872       | V    | 875.509763 | 438.258520      | 858.483214     | 429.745245       | 8 |
| 3 | 638.369430  | 319.688353      | 621.342881     | 311.175078       | V    | 776.441349 | 388.724313      | 759.414800     | 380.211038       | 7 |
| 4 | 709.406544  | 355.206910      | 692.379995     | 346.693635       | A    | 677.372935 | 339.190106      | 660.346386     | 330.676831       | 6 |
| 5 | 766.428008  | 383.717642      | 749.401459     | 375.204367       | G    | 606.335821 | 303.671549      | 589.309272     | 295.158274       | 5 |
| 6 | 879.512072  | 440.259674      | 862.485523     | 431.746400       | L    | 549.314357 | 275.160817      | 532.287808     | 266.647542       | 4 |
| 7 | 993.554999  | 497.281138      | 976.528450     | 488.767863       | N    | 436.230293 | 218.618784      | 419.203744     | 210.105510       | 3 |
| 8 | 1140.623413 | 570.815345      | 1123.596864    | 562.302070       | F    | 322.187366 | 161.597321      | 305.160817     | 153.084047       | 2 |
| 9 |             |                 |                |                  | R    | 175.118952 | 88.063114       | 158.092403     | 79.549839        | 1 |

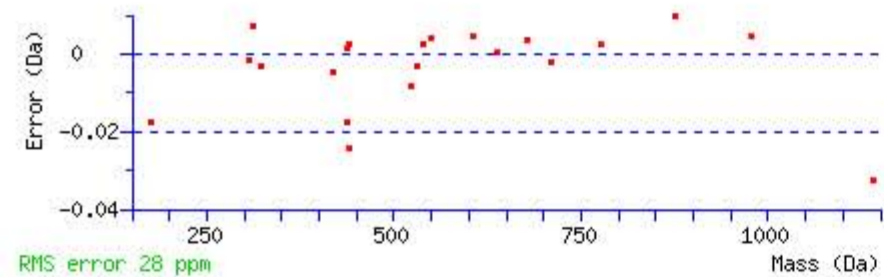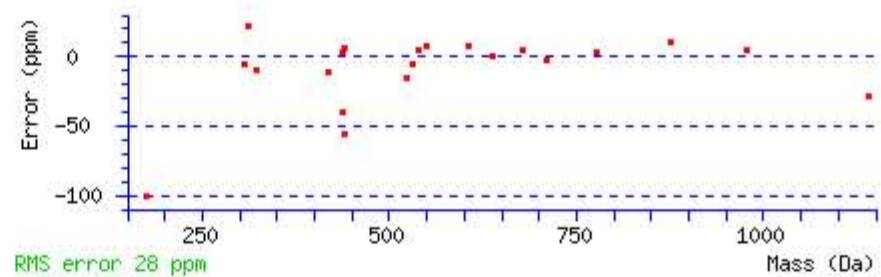

NCBI BLAST search of **QVVAGLNFR**

(Parameters: blastp, nr protein database, expect=20000, no filter, PAM30)

Other BLAST [web gateways](#)

## All matches to this query

| Score | Mr(calc):   | Delta     | Sequence                      |
|-------|-------------|-----------|-------------------------------|
| 27.7  | 1313.727814 | 0.001594  | <a href="#">QVVAGLNFR</a>     |
| 4.4   | 1313.748947 | -0.019539 | <a href="#">VLVQSVCIQIR</a>   |
| 2.0   | 1313.730286 | -0.000878 | <a href="#">AKEDVLQKEVR</a>   |
| 2.0   | 1313.731644 | -0.002236 | <a href="#">GEP PPPVRRPGR</a> |
| 2.0   | 1313.745575 | -0.016167 | <a href="#">GSLALQPFLVGGR</a> |
| 2.0   | 1313.727798 | 0.001610  | <a href="#">KLSLSVWQR</a>     |
| 2.0   | 1313.730301 | -0.000893 | <a href="#">LSQTLQVQLER</a>   |
| 2.0   | 1313.741516 | -0.012108 | <a href="#">NLTRLDSLNR</a>    |
| 2.0   | 1313.730286 | -0.000878 | <a href="#">QVTKEEGLALAR</a>  |
| 2.0   | 1313.723755 | 0.005653  | <a href="#">SLKMLPERGQR</a>   |



# MASCOT SEARCH RESULTS

## Peptide View

MS/MS Fragmentation of **EGDCPVQSGK**

Found in **KNG1\_HUMAN**, Kininogen-1 OS=Homo sapiens GN=KNG1 PE=1 SV=2

Match to Query 23067: 1386.620748 from(694.317650,2+) rtinseconds(1421) index(15369)

Title: Locus:1.1.1.3060.24 File:"2013-07-02 CLN FXIII 180 min 3rd F 2.wiff"

Data file C:\Program Files (x86)\Matrix Science\Mascot Daemon\mgf\9 FXIII 180 min 3rd\mascot\_daemon\_merge.mgf

Click mouse within plot area to zoom in by factor of two about that point

Or, Plot from  to  Da

Label all possible matches  Label matches used for scoring

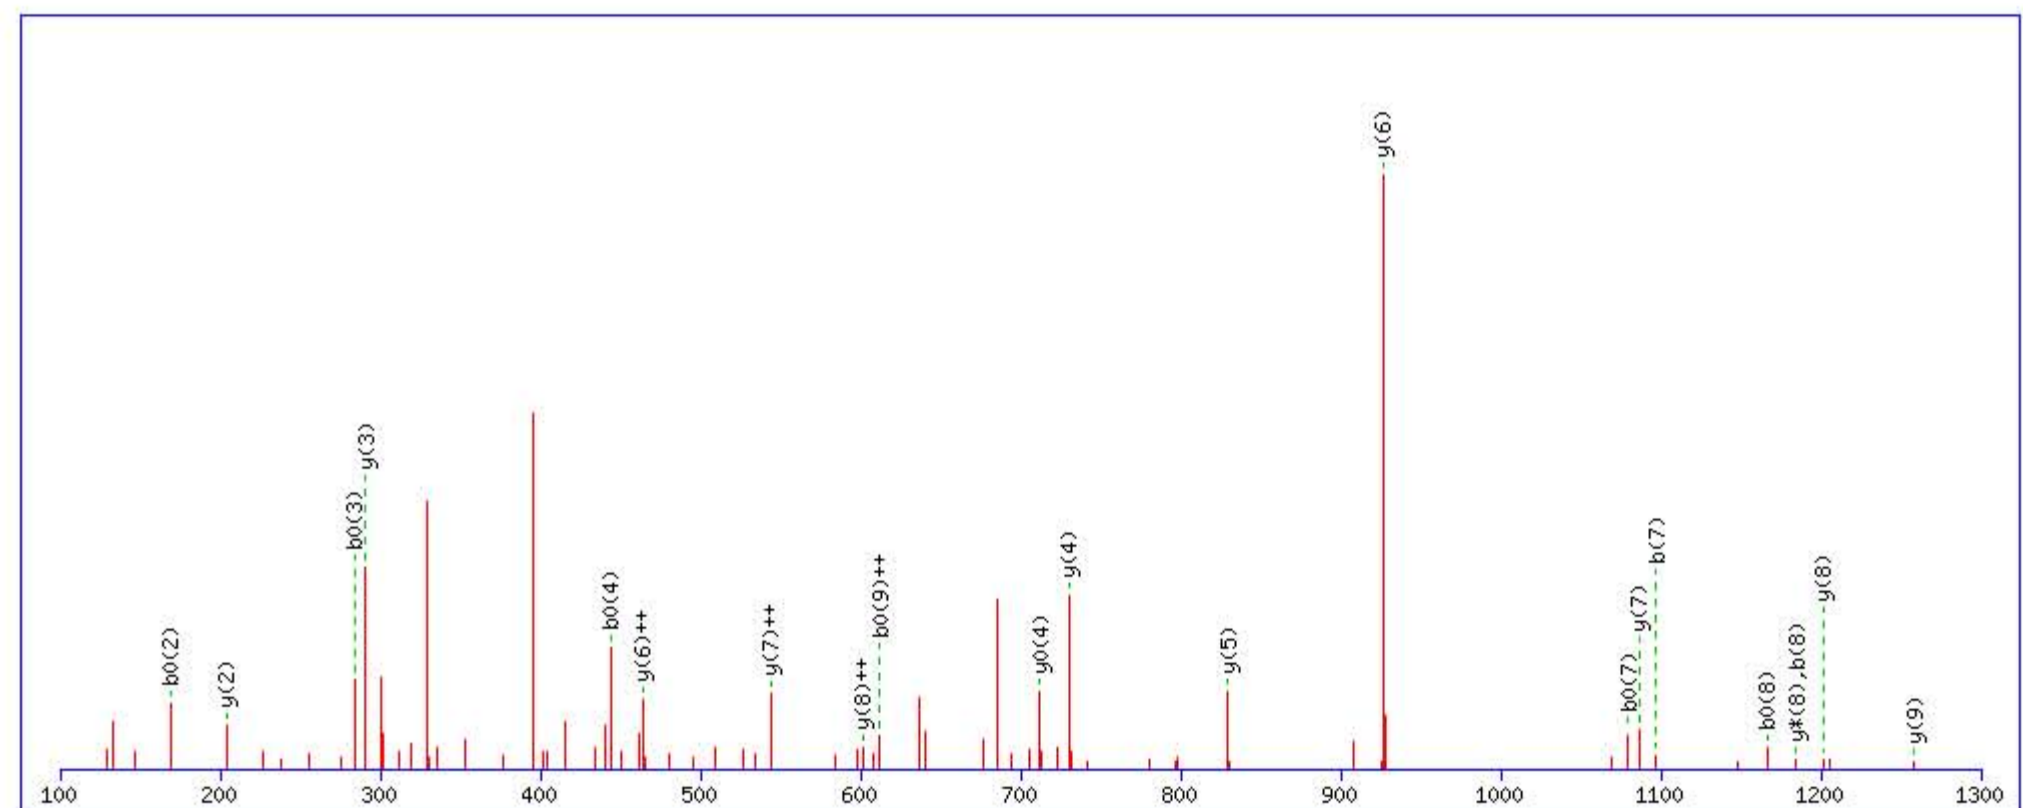

Monoisotopic mass of neutral peptide Mr(calc): 1386.627182

Fixed modifications: Carbamidomethyl (C) (apply to specified residues or termini only)

Variable modifications:

Q7 : Biotin:Thermo-21345 (Q)

Ions Score: 58 Expect: 9.7e-006

Matches : 21/92 fragment ions using 31 most intense peaks [\(help\)](#)

| #  | b           | b <sup>++</sup> | b <sup>*</sup> | b <sup>*++</sup> | b <sup>0</sup> | b <sup>0++</sup> | Seq. | y           | y <sup>++</sup> | y <sup>*</sup> | y <sup>*++</sup> | y <sup>0</sup> | y <sup>0++</sup> | #  |
|----|-------------|-----------------|----------------|------------------|----------------|------------------|------|-------------|-----------------|----------------|------------------|----------------|------------------|----|
| 1  | 130.049869  | 65.528572       |                |                  | 112.039304     | 56.523290        | E    |             |                 |                |                  |                |                  | 10 |
| 2  | 187.071333  | 94.039305       |                |                  | 169.060768     | 85.034022        | G    | 1258.591856 | 629.799566      | 1241.565307    | 621.286292       | 1240.581291    | 620.794284       | 9  |
| 3  | 302.098276  | 151.552776      |                |                  | 284.087711     | 142.547494       | D    | 1201.570392 | 601.288834      | 1184.543843    | 592.775560       | 1183.559827    | 592.283552       | 8  |
| 4  | 462.128925  | 231.568101      |                |                  | 444.118360     | 222.562818       | C    | 1086.543449 | 543.775363      | 1069.516900    | 535.262088       | 1068.532884    | 534.770080       | 7  |
| 5  | 559.181689  | 280.094483      |                |                  | 541.171124     | 271.089200       | P    | 926.512800  | 463.760038      | 909.486251     | 455.246764       | 908.502235     | 454.754756       | 6  |
| 6  | 658.250103  | 329.628690      |                |                  | 640.239538     | 320.623407       | V    | 829.460036  | 415.233656      | 812.433487     | 406.720382       | 811.449471     | 406.228374       | 5  |
| 7  | 1097.475429 | 549.241353      | 1080.448880    | 540.728078       | 1079.464864    | 540.236070       | Q    | 730.391622  | 365.699449      | 713.365073     | 357.186175       | 712.381057     | 356.694167       | 4  |
| 8  | 1184.507457 | 592.757367      | 1167.480908    | 584.244092       | 1166.496892    | 583.752084       | S    | 291.166296  | 146.086786      | 274.139747     | 137.573512       | 273.155731     | 137.081504       | 3  |
| 9  | 1241.528921 | 621.268099      | 1224.502372    | 612.754824       | 1223.518356    | 612.262816       | G    | 204.134268  | 102.570772      | 187.107719     | 94.057497        |                |                  | 2  |
| 10 |             |                 |                |                  |                |                  | K    | 147.112804  | 74.060040       | 130.086255     | 65.546765        |                |                  | 1  |

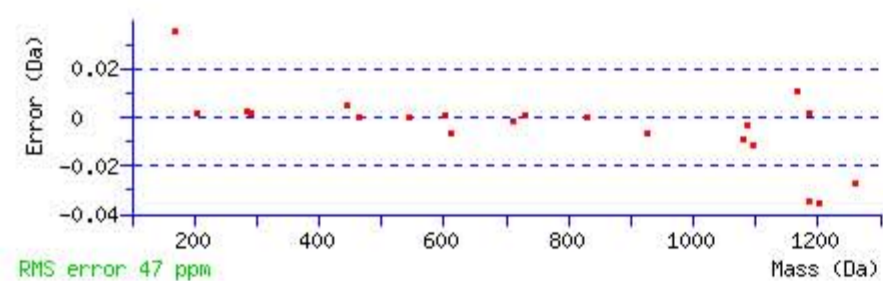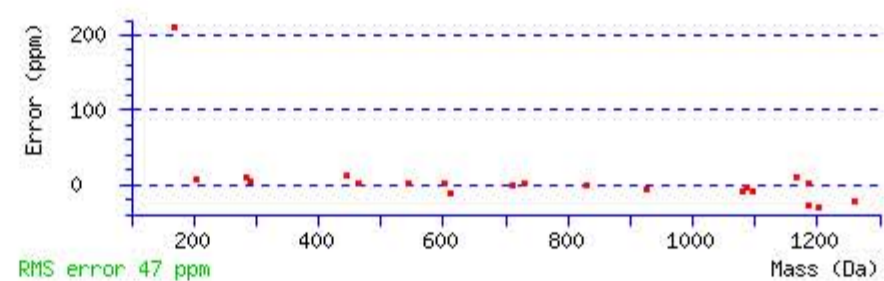

NCBI BLAST search of **EGDCPVQSGK**

(Parameters: blastp, nr protein database, expect=20000, no filter, PAM30)

Other BLAST [web gateways](#)

All matches to this query

| Score | Mr(calc):   | Delta     | Sequence                    |
|-------|-------------|-----------|-----------------------------|
| 57.6  | 1386.627182 | -0.006434 | <a href="#">EGDCPVQSGK</a>  |
| 5.4   | 1386.619766 | 0.000982  | <a href="#">QMQQQEHDSLK</a> |

# Mascot Search Results

## Peptide View

MS/MS Fragmentation of **TWQDCEYK**

Found in **KNG1\_HUMAN**, Kininogen-1 OS=Homo sapiens GN=KNG1 PE=1 SV=2

Match to Query 25574: 1439.615508 from(720.815030,2+) rtinseconds(1799) index(17731)

Title: Locus:1.1.1.3192.8 File:"2013-07-02 CLN FXIII 180 min 3rd F 2.wiff"

Data file C:\Program Files (x86)\Matrix Science\Mascot Daemon\mgf9 FXIII 180 min 3rd\mascot\_daemon\_merge.mgf

Click mouse within plot area to zoom in by factor of two about that point

Or, Plot from  to  Da

Label all possible matches  Label matches used for scoring

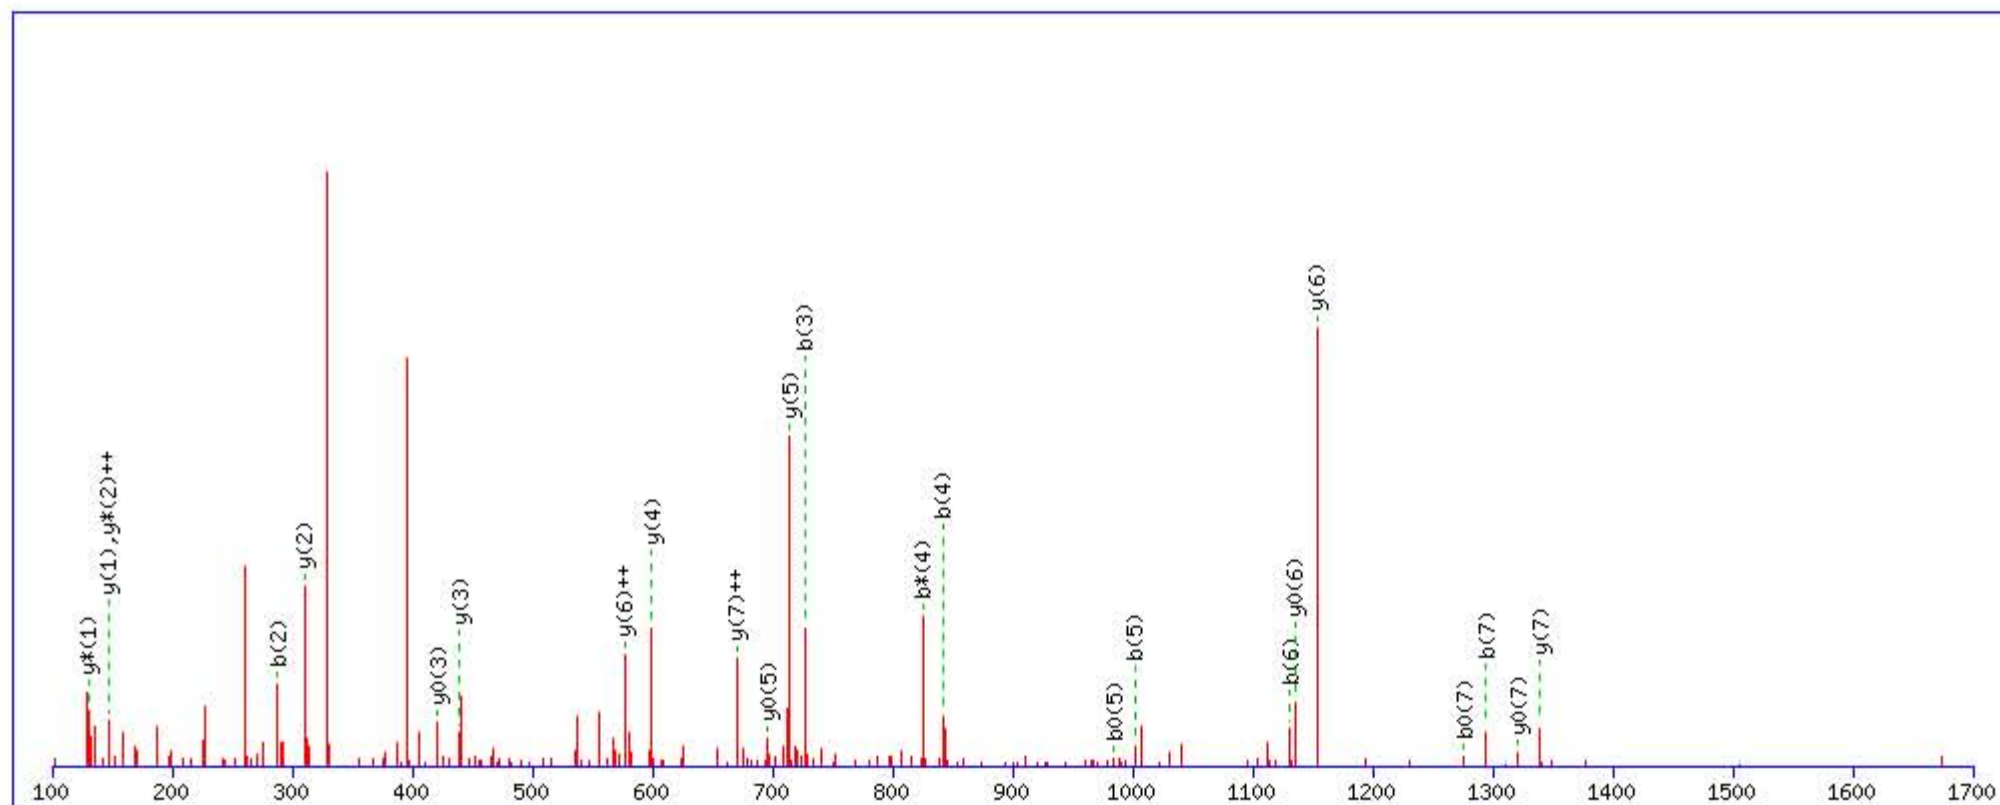

Monoisotopic mass of neutral peptide Mr(calc): 1439.621353

Fixed modifications: Carbamidomethyl (C) (apply to specified residues or termini only)

Variable modifications:

Q3 : Biotin:Thermo-21345 (Q)

Ions Score: 30 Expect: 0.0036

Matches : 24/76 fragment ions using 52 most intense peaks [\(help\)](#)

| # | b                  | b <sup>++</sup> | b <sup>*</sup>    | b <sup>*++</sup> | b <sup>0</sup>     | b <sup>0++</sup> | Seq. | y                  | y <sup>++</sup>   | y <sup>*</sup>    | y <sup>*++</sup>  | y <sup>0</sup>     | y <sup>0++</sup> | # |
|---|--------------------|-----------------|-------------------|------------------|--------------------|------------------|------|--------------------|-------------------|-------------------|-------------------|--------------------|------------------|---|
| 1 | 102.054955         | 51.531116       |                   |                  | 84.044390          | 42.525833        | T    |                    |                   |                   |                   |                    |                  | 8 |
| 2 | <b>288.134268</b>  | 144.570772      |                   |                  | 270.123703         | 135.565490       | W    | <b>1339.580957</b> | <b>670.294117</b> | 1322.554408       | 661.780842        | <b>1321.570392</b> | 661.288834       | 7 |
| 3 | <b>727.359594</b>  | 364.183435      | 710.333045        | 355.670161       | 709.349029         | 355.178153       | Q    | <b>1153.501644</b> | <b>577.254460</b> | 1136.475095       | 568.741186        | <b>1135.491079</b> | 568.249178       | 6 |
| 4 | <b>842.386537</b>  | 421.696907      | <b>825.359988</b> | 413.183632       | 824.375972         | 412.691624       | D    | <b>714.276318</b>  | 357.641797        | 697.249769        | 349.128523        | <b>696.265753</b>  | 348.636515       | 5 |
| 5 | <b>1002.417186</b> | 501.712231      | 985.390637        | 493.198957       | <b>984.406621</b>  | 492.706949       | C    | <b>599.249375</b>  | 300.128326        | 582.222826        | 291.615051        | 581.238810         | 291.123043       | 4 |
| 6 | <b>1131.459779</b> | 566.233528      | 1114.433230       | 557.720253       | 1113.449214        | 557.228245       | E    | <b>439.218726</b>  | 220.113001        | 422.192177        | 211.599727        | <b>421.208161</b>  | 211.107719       | 3 |
| 7 | <b>1294.523108</b> | 647.765192      | 1277.496559       | 639.251918       | <b>1276.512543</b> | 638.759910       | Y    | <b>310.176133</b>  | 155.591705        | 293.149584        | <b>147.078430</b> |                    |                  | 2 |
| 8 |                    |                 |                   |                  |                    |                  | K    | <b>147.112804</b>  | 74.060040         | <b>130.086255</b> | 65.546765         |                    |                  | 1 |

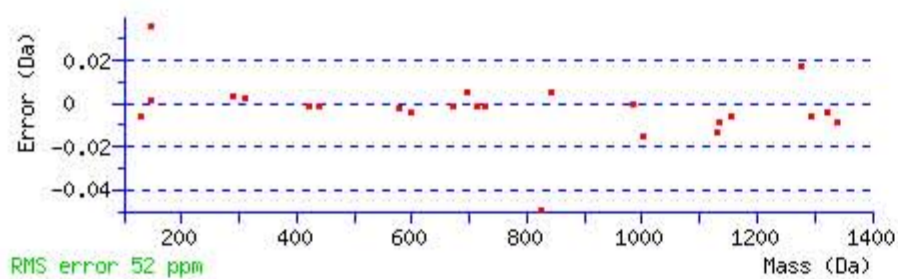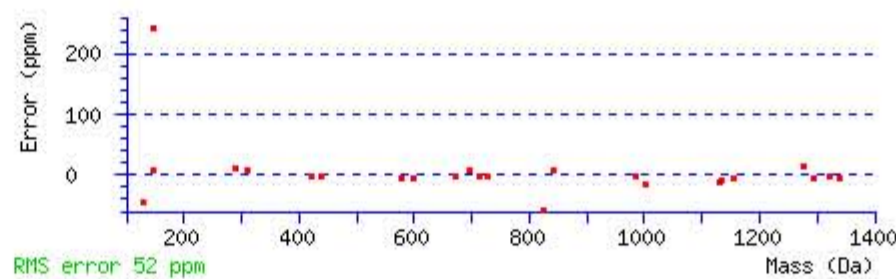

NCBI BLAST search of **TWQDCEYK**

(Parameters: blastp, nr protein database, expect=20000, no filter, PAM30)

Other BLAST [web gateways](#)

All matches to this query

| Score | Mr(calc):   | Delta     | Sequence                    |
|-------|-------------|-----------|-----------------------------|
| 30.1  | 1439.621353 | -0.005845 | <a href="#">TWQDCEYK</a>    |
| 5.0   | 1439.602036 | 0.013472  | <a href="#">EQMEEEQKAMR</a> |

Mascot: <http://www.matrixscience.com/>

# MASCOT SEARCH RESULTS

## Peptide View

MS/MS Fragmentation of **IASFSQNCDIYPGK**

Found in **KNG1\_HUMAN**, Kininogen-1 OS=Homo sapiens GN=KNG1 PE=1 SV=2

Match to Query 37614: 1909.890968 from(955.952760,2+) rtinseconds(2064) index(19397)

Title: Locus:1.1.1.3284.13 File:"2013-07-02 CLN FXIII 180 min 3rd F 2.wiff"

Data file C:\Program Files (x86)\Matrix Science\Mascot Daemon\mgf\9 FXIII 180 min 3rd\mascot\_daemon\_merge.mgf

Click mouse within plot area to zoom in by factor of two about that point

Or, Plot from  to  Da

Label all possible matches  Label matches used for scoring

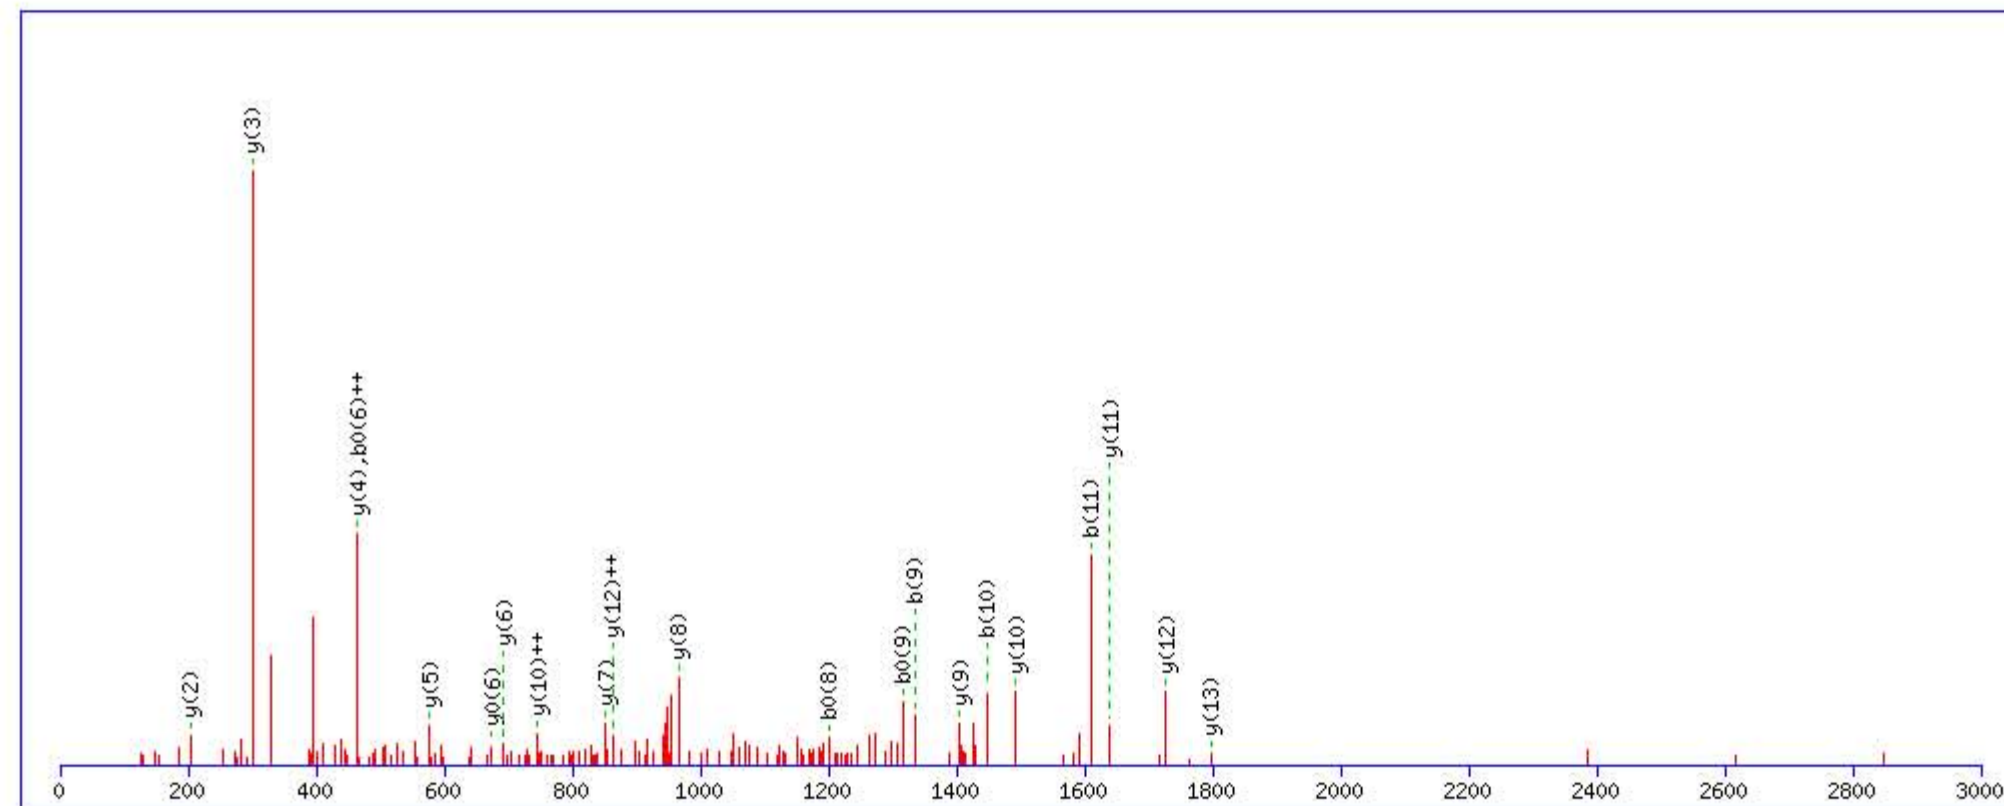

Monoisotopic mass of neutral peptide Mr(calc): 1909.906631

Fixed modifications: Carbamidomethyl (C) (apply to specified residues or termini only)

Variable modifications:

Q6 : Biotin:Thermo-21345 (Q)

Ions Score: 85 Expect: 4.6e-008

Matches : 21/132 fragment ions using 34 most intense peaks [\(help\)](#)

| #  | b                  | b <sup>++</sup> | b <sup>+</sup> | b <sup>+++</sup> | b <sup>0</sup>     | b <sup>0++</sup>  | Seq. | y                  | y <sup>++</sup>   | y <sup>+</sup> | y <sup>+++</sup> | y <sup>0</sup>    | y <sup>0++</sup> | #  |
|----|--------------------|-----------------|----------------|------------------|--------------------|-------------------|------|--------------------|-------------------|----------------|------------------|-------------------|------------------|----|
| 1  | 114.091340         | 57.549308       |                |                  |                    |                   | I    |                    |                   |                |                  |                   |                  | 14 |
| 2  | 185.128454         | 93.067865       |                |                  |                    |                   | A    | <b>1797.829854</b> | 899.418565        | 1780.803305    | 890.905291       | 1779.819289       | 890.413283       | 13 |
| 3  | 272.160482         | 136.583879      |                |                  | 254.149917         | 127.578596        | S    | <b>1726.792740</b> | <b>863.900008</b> | 1709.766191    | 855.386734       | 1708.782175       | 854.894726       | 12 |
| 4  | 419.228896         | 210.118086      |                |                  | 401.218331         | 201.112803        | F    | <b>1639.760712</b> | 820.383994        | 1622.734163    | 811.870720       | 1621.750147       | 811.378712       | 11 |
| 5  | 506.260924         | 253.634100      |                |                  | 488.250359         | 244.628817        | S    | <b>1492.692298</b> | <b>746.849787</b> | 1475.665749    | 738.336513       | 1474.681733       | 737.844505       | 10 |
| 6  | 945.486250         | 473.246763      | 928.459701     | 464.733488       | 927.475685         | <b>464.241480</b> | Q    | <b>1405.660270</b> | 703.333773        | 1388.633721    | 694.820499       | 1387.649705       | 694.328491       | 9  |
| 7  | 1059.529177        | 530.268226      | 1042.502628    | 521.754952       | 1041.518612        | 521.262944        | N    | <b>966.434944</b>  | 483.721110        | 949.408395     | 475.207836       | 948.424379        | 474.715828       | 8  |
| 8  | 1219.559826        | 610.283551      | 1202.533277    | 601.770277       | <b>1201.549261</b> | 601.278268        | C    | <b>852.392017</b>  | 426.699647        | 835.365468     | 418.186372       | 834.381452        | 417.694364       | 7  |
| 9  | <b>1334.586769</b> | 667.797023      | 1317.560220    | 659.283748       | <b>1316.576204</b> | 658.791740        | D    | <b>692.361368</b>  | 346.684322        | 675.334819     | 338.171048       | <b>674.350803</b> | 337.679040       | 6  |
| 10 | <b>1447.670833</b> | 724.339054      | 1430.644284    | 715.825780       | 1429.660268        | 715.333772        | I    | <b>577.334425</b>  | 289.170851        | 560.307876     | 280.657576       |                   |                  | 5  |
| 11 | <b>1610.734162</b> | 805.870719      | 1593.707613    | 797.357445       | 1592.723597        | 796.865436        | Y    | <b>464.250361</b>  | 232.628818        | 447.223812     | 224.115544       |                   |                  | 4  |
| 12 | 1707.786926        | 854.397101      | 1690.760377    | 845.883827       | 1689.776361        | 845.391819        | P    | <b>301.187032</b>  | 151.097154        | 284.160483     | 142.583879       |                   |                  | 3  |
| 13 | 1764.808390        | 882.907833      | 1747.781841    | 874.394559       | 1746.797825        | 873.902550        | G    | <b>204.134268</b>  | 102.570772        | 187.107719     | 94.057497        |                   |                  | 2  |
| 14 |                    |                 |                |                  |                    |                   | K    | 147.112804         | 74.060040         | 130.086255     | 65.546765        |                   |                  | 1  |

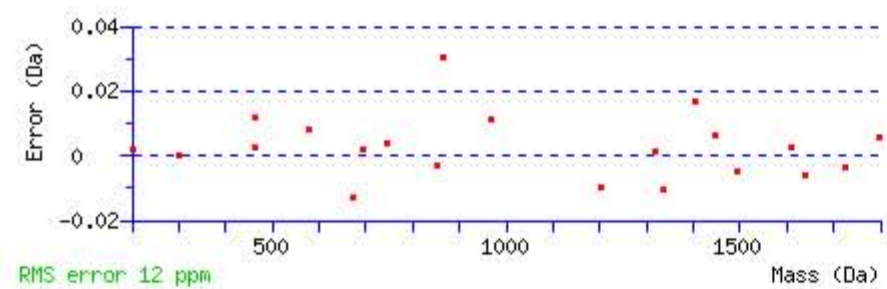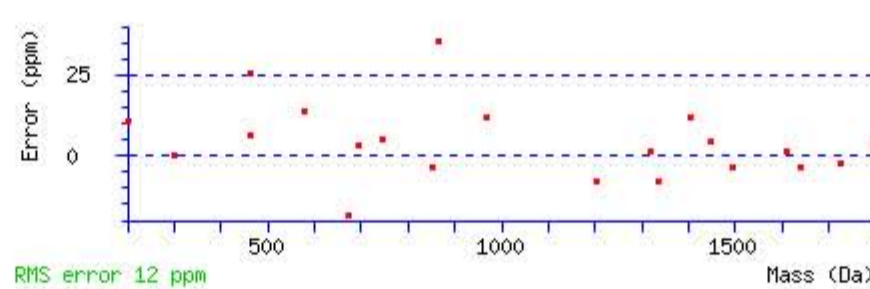

NCBI BLAST search of **IASFSQNCDIYPGK**

(Parameters: blastp, nr protein database, expect=20000, no filter, PAM30)

Other BLAST [web gateways](#)

All matches to this query

| Score | Mr(calc):   | Delta     | Sequence                            |
|-------|-------------|-----------|-------------------------------------|
| 85.1  | 1909.906631 | -0.015663 | <a href="#">IASFSQNCDIYPGK</a>      |
| 6.9   | 1909.877441 | 0.013527  | <a href="#">IAREAPSECNCPPAGPPGK</a> |

Mascot: <http://www.matrixscience.com/>

# MASCOT Search Results

## Peptide View

MS/MS Fragmentation of **YNSQNQSNNQFVLYR**

Found in **KNG1\_HUMAN**, Kininogen-1 OS=Homo sapiens GN=KNG1 PE=1 SV=2

Match to Query 43004: 2185.020628 from(1093.517590,2+) rtinseconds(2145) index(32713)

Title: Locus:1.1.1.3410.18 File:"2013-07-02 CLN FXIII 180 min 3rd F 3.wiff"

Data file C:\Program Files (x86)\Matrix Science\Mascot Daemon\mgf\9 FXIII 180 min 3rd\mascot\_daemon\_merge.mgf

Click mouse within plot area to zoom in by factor of two about that point

Or, Plot from  to  Da

Label all possible matches  Label matches used for scoring

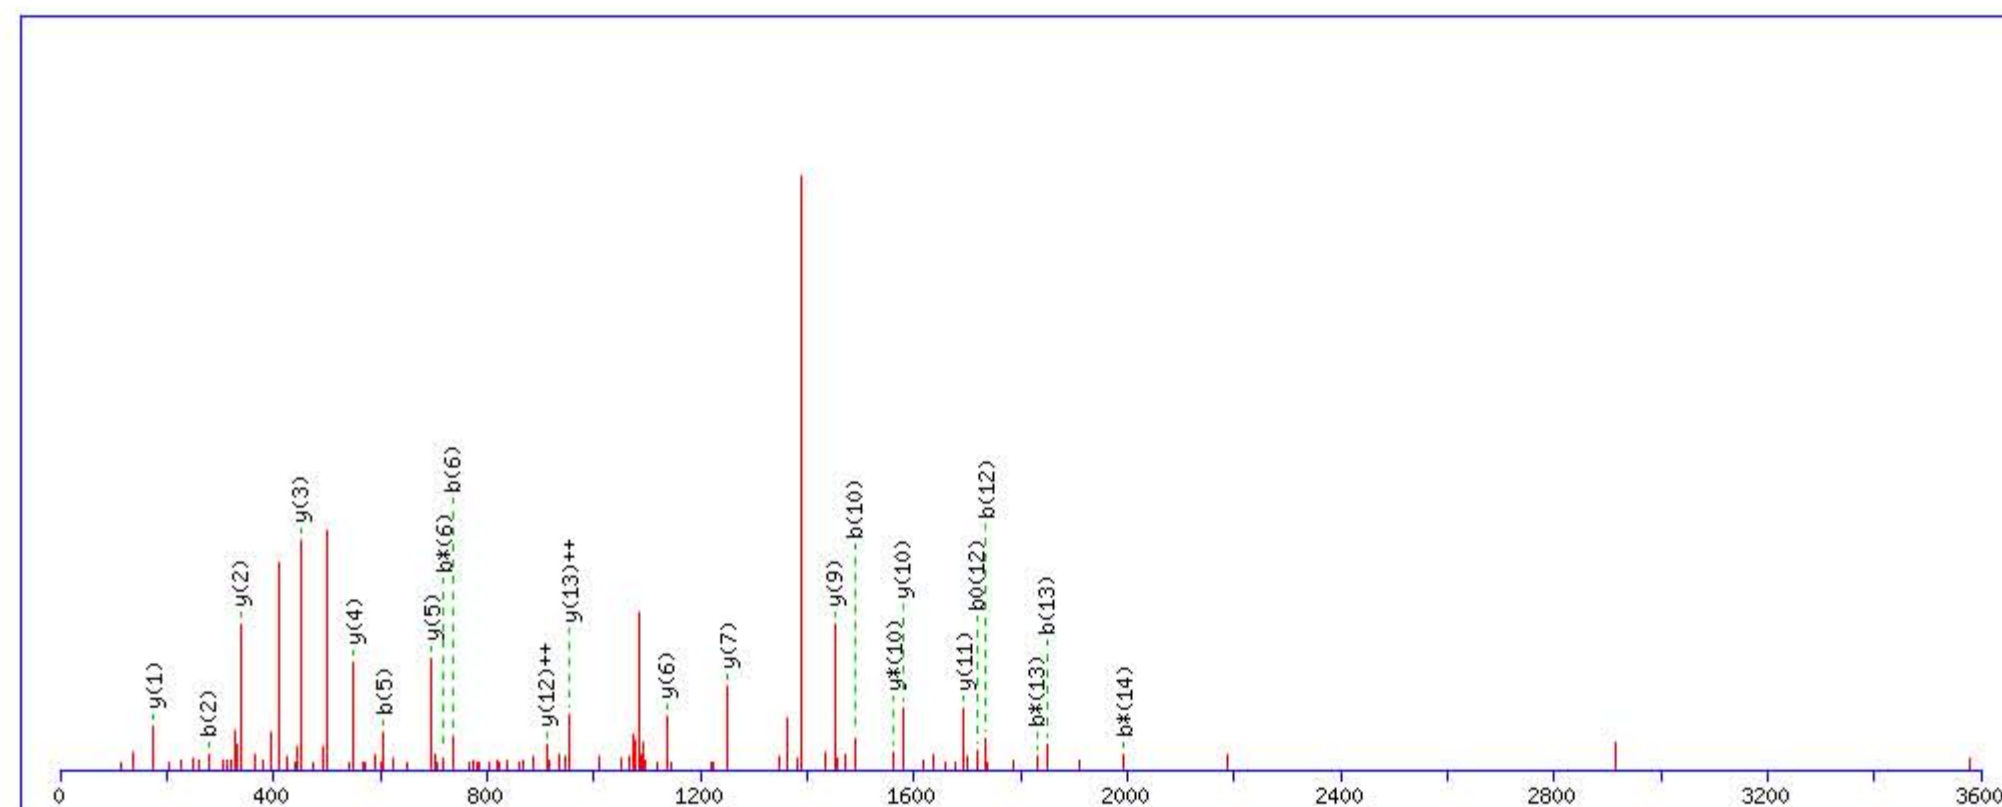

Monoisotopic mass of neutral peptide Mr(calc): 2185.037445

Fixed modifications: Carbamidomethyl (C) (apply to specified residues or termini only)

Variable modifications:

Q10 : Biotin:Thermo-21345 (Q)

Ions Score: 65 Expect: 1.3e-006

Matches : 23/146 fragment ions using 37 most intense peaks [\(help\)](#)

| #  | b                  | b <sup>++</sup> | b <sup>*</sup>     | b <sup>+++</sup> | b <sup>0</sup>     | b <sup>0++</sup> | Seq. | y                  | y <sup>++</sup>   | y <sup>*</sup>     | y <sup>+++</sup> | y <sup>0</sup> | y <sup>0++</sup> | #  |
|----|--------------------|-----------------|--------------------|------------------|--------------------|------------------|------|--------------------|-------------------|--------------------|------------------|----------------|------------------|----|
| 1  | 164.070605         | 82.538940       |                    |                  |                    |                  | Y    |                    |                   |                    |                  |                |                  | 15 |
| 2  | <b>278.113532</b>  | 139.560404      | 261.086983         | 131.047130       |                    |                  | N    | 2022.981419        | 1011.994348       | 2005.954870        | 1003.481073      | 2004.970854    | 1002.989065      | 14 |
| 3  | 365.145560         | 183.076418      | 348.119011         | 174.563144       | 347.134995         | 174.071136       | S    | 1908.938492        | <b>954.972884</b> | 1891.911943        | 946.459610       | 1890.927927    | 945.967602       | 13 |
| 4  | 493.204138         | 247.105707      | 476.177589         | 238.592433       | 475.193573         | 238.100425       | Q    | 1821.906464        | <b>911.456870</b> | 1804.879915        | 902.943596       | 1803.895899    | 902.451588       | 12 |
| 5  | <b>607.247065</b>  | 304.127171      | 590.220516         | 295.613896       | 589.236500         | 295.121888       | N    | <b>1693.847886</b> | 847.427581        | 1676.821337        | 838.914307       | 1675.837321    | 838.422299       | 11 |
| 6  | <b>735.305643</b>  | 368.156460      | <b>718.279094</b>  | 359.643185       | 717.295078         | 359.151177       | Q    | <b>1579.804959</b> | 790.406118        | <b>1562.778410</b> | 781.892843       | 1561.794394    | 781.400835       | 10 |
| 7  | 822.337671         | 411.672474      | 805.311122         | 403.159199       | 804.327106         | 402.667191       | S    | <b>1451.746381</b> | 726.376829        | 1434.719832        | 717.863554       | 1433.735816    | 717.371546       | 9  |
| 8  | 936.380598         | 468.693937      | 919.354049         | 460.180662       | 918.370033         | 459.688654       | N    | 1364.714353        | 682.860815        | 1347.687804        | 674.347540       |                |                  | 8  |
| 9  | 1050.423525        | 525.715400      | 1033.396976        | 517.202126       | 1032.412960        | 516.710118       | N    | <b>1250.671426</b> | 625.839351        | 1233.644877        | 617.326077       |                |                  | 7  |
| 10 | <b>1489.648851</b> | 745.328064      | 1472.622302        | 736.814789       | 1471.638286        | 736.322781       | Q    | <b>1136.628499</b> | 568.817888        | 1119.601950        | 560.304613       |                |                  | 6  |
| 11 | 1636.717265        | 818.862271      | 1619.690716        | 810.348996       | 1618.706700        | 809.856988       | F    | <b>697.403173</b>  | 349.205225        | 680.376624         | 340.691950       |                |                  | 5  |
| 12 | <b>1735.785679</b> | 868.396478      | 1718.759130        | 859.883203       | <b>1717.775114</b> | 859.391195       | V    | <b>550.334759</b>  | 275.671018        | 533.308210         | 267.157743       |                |                  | 4  |
| 13 | <b>1848.869743</b> | 924.938510      | <b>1831.843194</b> | 916.425235       | 1830.859178        | 915.933227       | L    | <b>451.266345</b>  | 226.136811        | 434.239796         | 217.623536       |                |                  | 3  |
| 14 | 2011.933072        | 1006.470174     | <b>1994.906523</b> | 997.956900       | 1993.922507        | 997.464892       | Y    | <b>338.182281</b>  | 169.594779        | 321.155732         | 161.081504       |                |                  | 2  |
| 15 |                    |                 |                    |                  |                    |                  | R    | <b>175.118952</b>  | 88.063114         | 158.092403         | 79.549840        |                |                  | 1  |

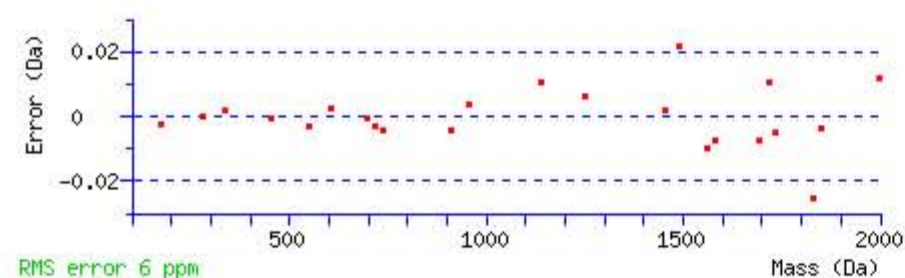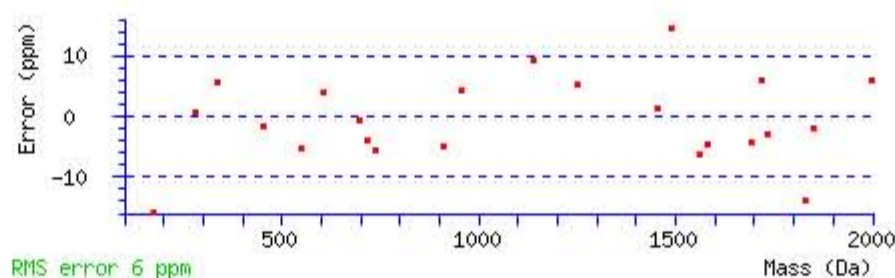

NCBI BLAST search of **YNSQNQSNNQFVLYR**

(Parameters: blastp, nr protein database, expect=20000, no filter, PAM30)

Other BLAST [web gateways](#)

All matches to this query

| Score | Mr(calc):   | Delta     | Sequence                        |
|-------|-------------|-----------|---------------------------------|
| 64.8  | 2185.037445 | -0.016817 | <a href="#">YNSQNQSNNQFVLYR</a> |
| 28.8  | 2185.037445 | -0.016817 | <a href="#">YNSQNQSNNQFVLYR</a> |
| 13.4  | 2185.037445 | -0.016817 | <a href="#">YNSQNQSNNQFVLYR</a> |

# MASCOT Search Results

## Peptide View

MS/MS Fragmentation of **YNSQNQSNNQFVLYR**

Found in **KNG1\_HUMAN**, Kininogen-1 OS=Homo sapiens GN=KNG1 PE=1 SV=2

Match to Query 43005: 2185.031248 from(1093.522900,2+) rtinseconds(2062) index(19385)

Title: Locus:1.1.1.3283.14 File:"2013-07-02 CLN FXIII 180 min 3rd F 2.wiff"

Data file C:\Program Files (x86)\Matrix Science\Mascot Daemon\mgf9 FXIII 180 min 3rd\mascot\_daemon\_merge.mgf

Click mouse within plot area to zoom in by factor of two about that point

Or, Plot from  to  Da

Label all possible matches  Label matches used for scoring

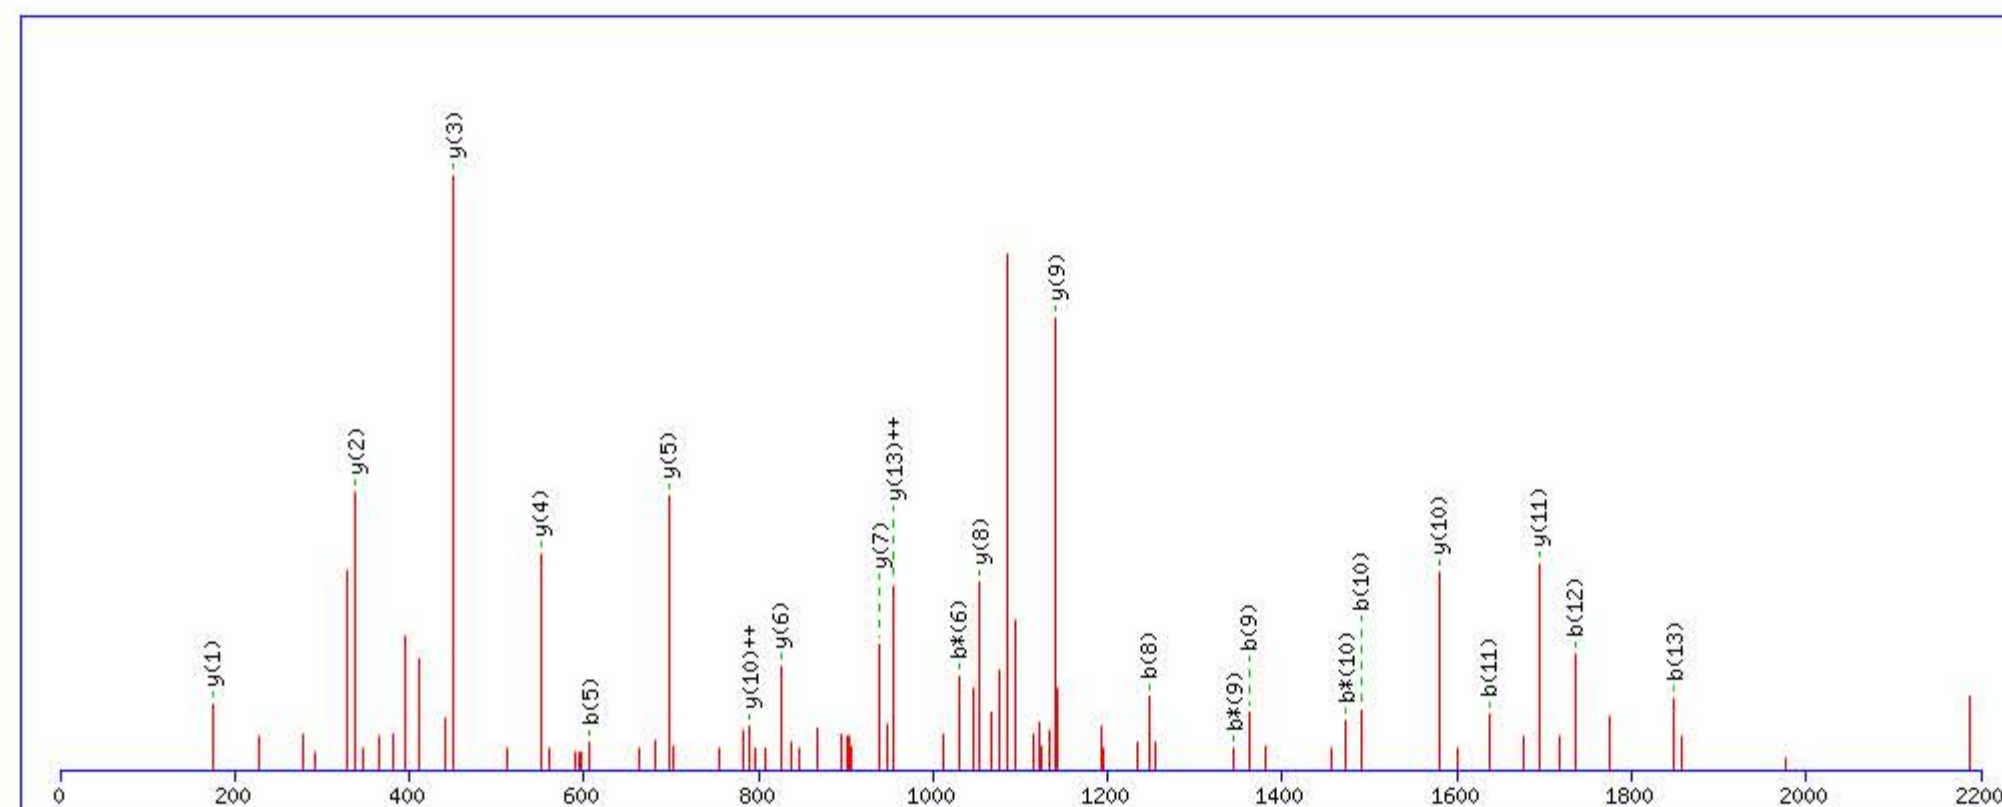

Monoisotopic mass of neutral peptide Mr(calc): 2185.037445

Fixed modifications: Carbamidomethyl (C) (apply to specified residues or termini only)

Variable modifications:

Q6 : Biotin:Thermo-21345 (Q)

Ions Score: 81 Expect: 2.8e-008

Matches : 23/146 fragment ions using 34 most intense peaks [\(help\)](#)

| #  | b           | b <sup>++</sup> | b <sup>+</sup> | b <sup>+++</sup> | b <sup>0</sup> | b <sup>0++</sup> | Seq. | y           | y <sup>++</sup> | y <sup>+</sup> | y <sup>+++</sup> | y <sup>0</sup> | y <sup>0++</sup> | #  |
|----|-------------|-----------------|----------------|------------------|----------------|------------------|------|-------------|-----------------|----------------|------------------|----------------|------------------|----|
| 1  | 164.070605  | 82.538940       |                |                  |                |                  | Y    |             |                 |                |                  |                |                  | 15 |
| 2  | 278.113532  | 139.560404      | 261.086983     | 131.047130       |                |                  | N    | 2022.981419 | 1011.994348     | 2005.954870    | 1003.481073      | 2004.970854    | 1002.989065      | 14 |
| 3  | 365.145560  | 183.076418      | 348.119011     | 174.563144       | 347.134995     | 174.071136       | S    | 1908.938492 | 954.972884      | 1891.911943    | 946.459610       | 1890.927927    | 945.967602       | 13 |
| 4  | 493.204138  | 247.105707      | 476.177589     | 238.592433       | 475.193573     | 238.100425       | Q    | 1821.906464 | 911.456870      | 1804.879915    | 902.943596       | 1803.895899    | 902.451588       | 12 |
| 5  | 607.247065  | 304.127171      | 590.220516     | 295.613896       | 589.236500     | 295.121888       | N    | 1693.847886 | 847.427581      | 1676.821337    | 838.914307       | 1675.837321    | 838.422299       | 11 |
| 6  | 1046.472391 | 523.739834      | 1029.445842    | 515.226559       | 1028.461826    | 514.734551       | Q    | 1579.804959 | 790.406118      | 1562.778410    | 781.892843       | 1561.794394    | 781.400835       | 10 |
| 7  | 1133.504419 | 567.255848      | 1116.477870    | 558.742573       | 1115.493854    | 558.250565       | S    | 1140.579633 | 570.793455      | 1123.553084    | 562.280180       | 1122.569068    | 561.788172       | 9  |
| 8  | 1247.547346 | 624.277311      | 1230.520797    | 615.764037       | 1229.536781    | 615.272029       | N    | 1053.547605 | 527.277441      | 1036.521056    | 518.764166       |                |                  | 8  |
| 9  | 1361.590273 | 681.298775      | 1344.563724    | 672.785500       | 1343.579708    | 672.293492       | N    | 939.504678  | 470.255977      | 922.478129     | 461.742703       |                |                  | 7  |
| 10 | 1489.648851 | 745.328064      | 1472.622302    | 736.814789       | 1471.638286    | 736.322781       | Q    | 825.461751  | 413.234514      | 808.435202     | 404.721239       |                |                  | 6  |
| 11 | 1636.717265 | 818.862271      | 1619.690716    | 810.348996       | 1618.706700    | 809.856988       | F    | 697.403173  | 349.205225      | 680.376624     | 340.691950       |                |                  | 5  |
| 12 | 1735.785679 | 868.396478      | 1718.759130    | 859.883203       | 1717.775114    | 859.391195       | V    | 550.334759  | 275.671018      | 533.308210     | 267.157743       |                |                  | 4  |
| 13 | 1848.869743 | 924.938510      | 1831.843194    | 916.425235       | 1830.859178    | 915.933227       | L    | 451.266345  | 226.136811      | 434.239796     | 217.623536       |                |                  | 3  |
| 14 | 2011.933072 | 1006.470174     | 1994.906523    | 997.956900       | 1993.922507    | 997.464892       | Y    | 338.182281  | 169.594779      | 321.155732     | 161.081504       |                |                  | 2  |
| 15 |             |                 |                |                  |                |                  | R    | 175.118952  | 88.063114       | 158.092403     | 79.549840        |                |                  | 1  |

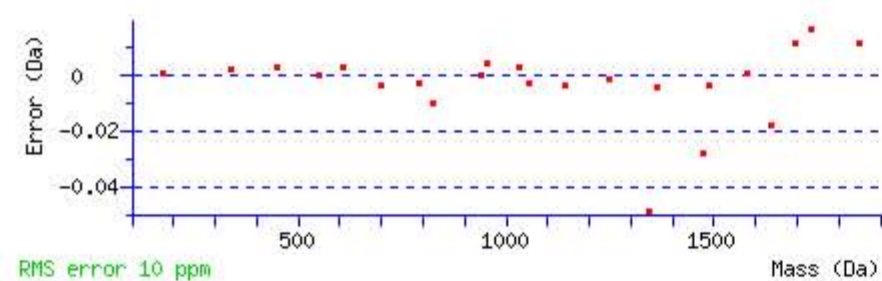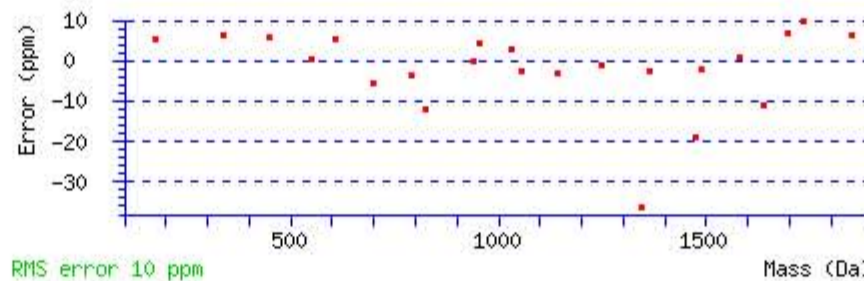

NCBI BLAST search of **YNSQNQSNNQFVLYR**

(Parameters: blastp, nr protein database, expect=20000, no filter, PAM30)

Other BLAST [web gateways](#)

### All matches to this query

| Score | Mr(calc):   | Delta     | Sequence                                |
|-------|-------------|-----------|-----------------------------------------|
| 81.1  | 2185.037445 | -0.006197 | <a href="#">YNSQNQSNNQFVLYR</a>         |
| 50.0  | 2185.037445 | -0.006197 | <a href="#">YNSQNQSNNQFVLYR</a>         |
| 43.1  | 2185.037445 | -0.006197 | <a href="#">YNSQNQSNNQFVLYR</a>         |
| 0.6   | 2185.040604 | -0.009356 | <a href="#">ERAAAAAAAAQMHAKNNGGSSSR</a> |
| 0.5   | 2185.047348 | -0.016100 | <a href="#">HLSSLTDNEQADIFER</a>        |

# MASCOT Search Results

## Peptide View

MS/MS Fragmentation of **LGQSLDCNAEVYVVPWEK**

Found in **KNG1\_HUMAN**, Kininogen-1 OS=Homo sapiens GN=KNG1 PE=1 SV=2

Match to Query 46747: 2417.172252 from(806.731360,3+) rtinseconds(2581) index(35035)

Title: Locus:1.1.1.3562.16 File:"2013-07-02 CLN FXIII 180 min 3rd F 3.wiff"

Data file C:\Program Files (x86)\Matrix Science\Mascot Daemon\mgf\9 FXIII 180 min 3rd\mascot\_daemon\_merge.mgf

Click mouse within plot area to zoom in by factor of two about that point

Or, Plot from  to  Da

Label all possible matches  Label matches used for scoring

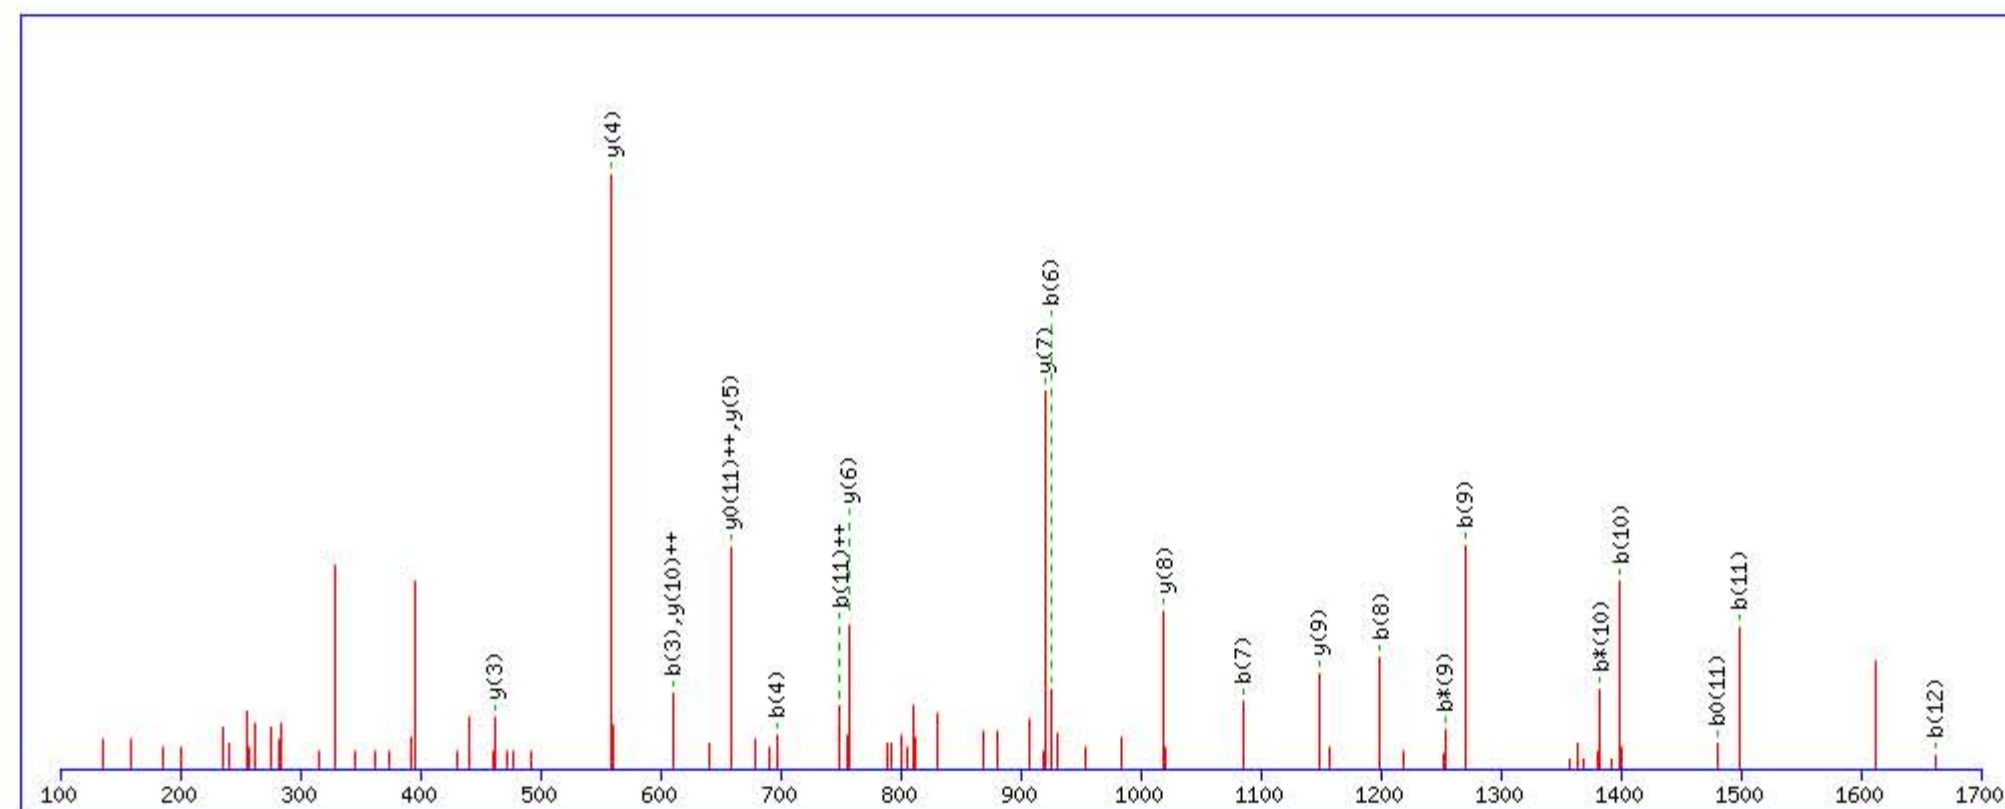

Monoisotopic mass of neutral peptide Mr(calc): 2417.175934

Fixed modifications: Carbamidomethyl (C) (apply to specified residues or termini only)

Variable modifications:

Q3 : Biotin:Thermo-21345 (Q)

Ions Score: 60 Expect: 3.1e-006

Matches : 22/192 fragment ions using 29 most intense peaks [\(help\)](#)

| #  | b                  | b <sup>++</sup>   | b <sup>+</sup>     | b <sup>+++</sup> | b <sup>0</sup>     | b <sup>0++</sup> | Seq. | y                  | y <sup>++</sup>   | y <sup>+</sup> | y <sup>+++</sup> | y <sup>0</sup> | y <sup>0++</sup>  | #  |
|----|--------------------|-------------------|--------------------|------------------|--------------------|------------------|------|--------------------|-------------------|----------------|------------------|----------------|-------------------|----|
| 1  | 114.091340         | 57.549308         |                    |                  |                    |                  | L    |                    |                   |                |                  |                |                   | 18 |
| 2  | 171.112804         | 86.060040         |                    |                  |                    |                  | G    | 2305.099153        | 1153.053214       | 2288.072604    | 1144.539940      | 2287.088588    | 1144.047932       | 17 |
| 3  | <b>610.338130</b>  | 305.672703        | 593.311581         | 297.159429       |                    |                  | Q    | 2248.077689        | 1124.542482       | 2231.051140    | 1116.029208      | 2230.067124    | 1115.537200       | 16 |
| 4  | <b>697.370158</b>  | 349.188717        | 680.343609         | 340.675443       | 679.359593         | 340.183435       | S    | 1808.852363        | 904.929820        | 1791.825814    | 896.416545       | 1790.841798    | 895.924537        | 15 |
| 5  | 810.454222         | 405.730749        | 793.427673         | 397.217475       | 792.443657         | 396.725467       | L    | 1721.820335        | 861.413806        | 1704.793786    | 852.900531       | 1703.809770    | 852.408523        | 14 |
| 6  | <b>925.481165</b>  | 463.244221        | 908.454616         | 454.730946       | 907.470600         | 454.238938       | D    | 1608.736271        | 804.871774        | 1591.709722    | 796.358499       | 1590.725706    | 795.866491        | 13 |
| 7  | <b>1085.511814</b> | 543.259545        | 1068.485265        | 534.746271       | 1067.501249        | 534.254262       | C    | 1493.709328        | 747.358302        | 1476.682779    | 738.845028       | 1475.698763    | 738.353020        | 12 |
| 8  | <b>1199.554741</b> | 600.281008        | 1182.528192        | 591.767734       | 1181.544176        | 591.275726       | N    | 1333.678679        | 667.342978        | 1316.652130    | 658.829703       | 1315.668114    | <b>658.337695</b> | 11 |
| 9  | <b>1270.591855</b> | 635.799565        | <b>1253.565306</b> | 627.286291       | 1252.581290        | 626.794283       | A    | 1219.635752        | <b>610.321514</b> | 1202.609203    | 601.808240       | 1201.625187    | 601.316232        | 10 |
| 10 | <b>1399.634448</b> | 700.320862        | <b>1382.607899</b> | 691.807588       | 1381.623883        | 691.315580       | E    | <b>1148.598638</b> | 574.802957        | 1131.572089    | 566.289683       | 1130.588073    | 565.797675        | 9  |
| 11 | <b>1498.702862</b> | <b>749.855069</b> | 1481.676313        | 741.341795       | <b>1480.692297</b> | 740.849787       | V    | <b>1019.556045</b> | 510.281661        | 1002.529496    | 501.768386       | 1001.545480    | 501.276378        | 8  |
| 12 | <b>1661.766191</b> | 831.386734        | 1644.739642        | 822.873459       | 1643.755626        | 822.381451       | Y    | <b>920.487631</b>  | 460.747454        | 903.461082     | 452.234179       | 902.477066     | 451.742171        | 7  |
| 13 | 1760.834605        | 880.920941        | 1743.808056        | 872.407666       | 1742.824040        | 871.915658       | V    | <b>757.424302</b>  | 379.215789        | 740.397753     | 370.702515       | 739.413737     | 370.210507        | 6  |
| 14 | 1859.903019        | 930.455148        | 1842.876470        | 921.941873       | 1841.892454        | 921.449865       | V    | <b>658.355888</b>  | 329.681582        | 641.329339     | 321.168308       | 640.345323     | 320.676300        | 5  |
| 15 | 1956.955783        | 978.981530        | 1939.929234        | 970.468255       | 1938.945218        | 969.976247       | P    | <b>559.287474</b>  | 280.147375        | 542.260925     | 271.634101       | 541.276909     | 271.142093        | 4  |
| 16 | 2143.035096        | 1072.021186       | 2126.008547        | 1063.507911      | 2125.024531        | 1063.015903      | W    | <b>462.234710</b>  | 231.620993        | 445.208161     | 223.107719       | 444.224145     | 222.615711        | 3  |
| 17 | 2272.077689        | 1136.542483       | 2255.051140        | 1128.029208      | 2254.067124        | 1127.537200      | E    | 276.155397         | 138.581337        | 259.128848     | 130.068062       | 258.144832     | 129.576054        | 2  |
| 18 |                    |                   |                    |                  |                    |                  | K    | 147.112804         | 74.060040         | 130.086255     | 65.546765        |                |                   | 1  |

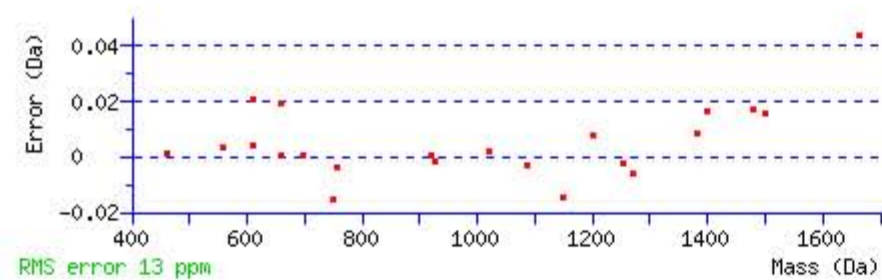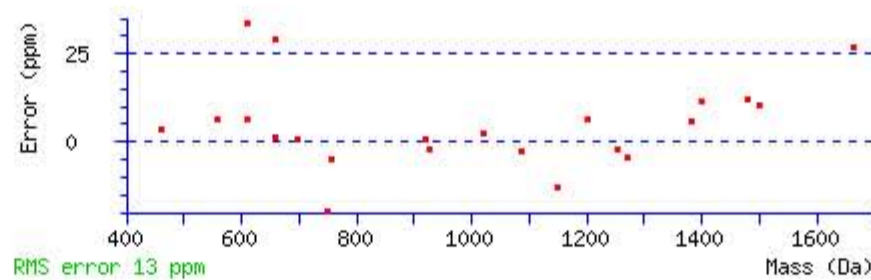

NCBI BLAST search of **LGQSLDCNAEVYVVPWEK**

(Parameters: blastp, nr protein database, expect=20000, no filter, PAM30)

Other BLAST [web gateways](#)

### All matches to this query

| Score | Mr(calc):   | Delta     | Sequence                                |
|-------|-------------|-----------|-----------------------------------------|
| 60.2  | 2417.175934 | -0.003682 | <a href="#">LGQSLDCNAEVYVVPWEK</a>      |
| 1.4   | 2417.149246 | 0.023006  | <a href="#">DEVSGAQMNSSLPLQDAVSSNLR</a> |
| 1.1   | 2417.146713 | 0.025539  | <a href="#">AMSIREQIGHDPDYILEEMNR</a>   |

# MASCOT Search Results

## Peptide View

MS/MS Fragmentation of **FKLDDDDLEHQQGGHVLDDHGHK**  
 Found in **KNG1\_HUMAN**, Kininogen-1 OS=Homo sapiens GN=KNG1 PE=1 SV=2

Match to Query 49613: 2607.260496 from(652.822400,4+) rtinseconds(1760) index(30334)  
 Title: Locus:1.1.1.3276.12 File:"2013-07-02 CLN FXIII 180 min 3rd F 3.wiff"  
 Data file C:\Program Files (x86)\Matrix Science\Mascot Daemon\mgf9 FXIII 180 min 3rd\mascot\_daemon\_merge.mgf

Click mouse within plot area to zoom in by factor of two about that point  
 Or, Plot from  to  Da   
 Label all possible matches  Label matches used for scoring

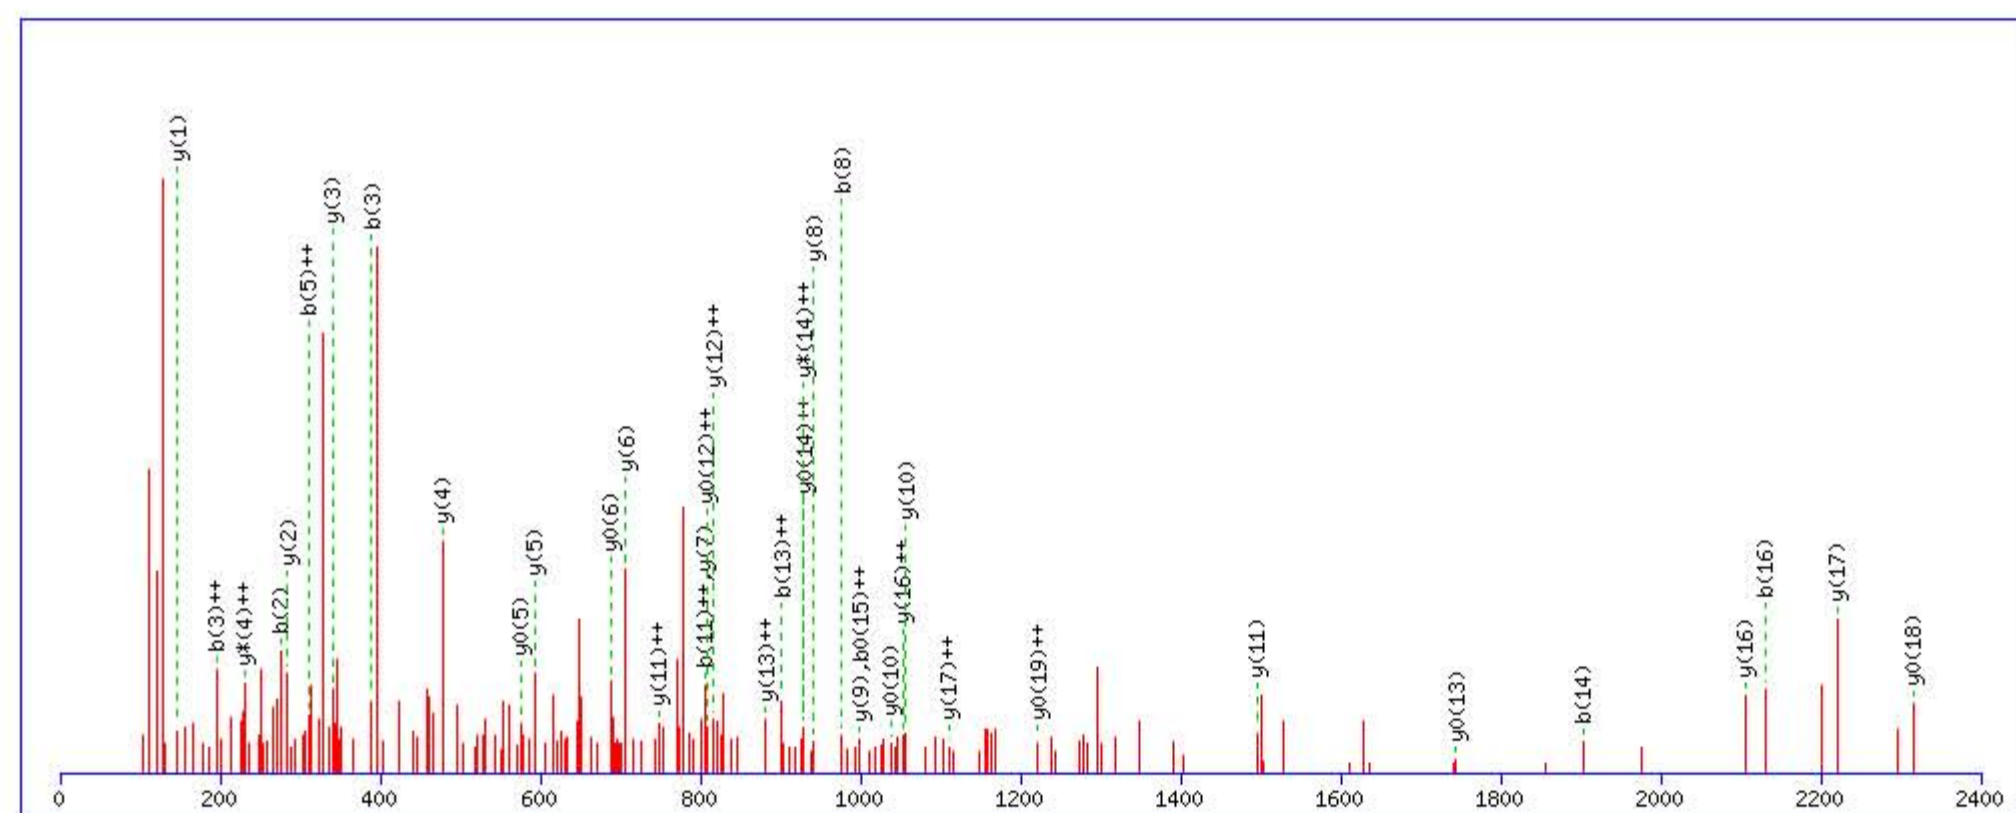

Monoisotopic mass of neutral peptide Mr(calc): 2607.265259  
 Fixed modifications: Carbamidomethyl (C) (apply to specified residues or termini only)  
 Variable modifications:  
 Q10 : Biotin:Thermo-21345 (Q)  
 Ions Score: 39 Expect: 0.003  
 Matches : 38/212 fragment ions using 108 most intense peaks ([help](#))

| #  | b                  | b <sup>++</sup>   | b <sup>*</sup> | b <sup>*++</sup> | b <sup>0</sup> | b <sup>0++</sup>  | Seq.     | y                  | y <sup>++</sup>    | y <sup>*</sup> | y <sup>*++</sup>  | y <sup>0</sup>     | y <sup>0++</sup>   | #         |
|----|--------------------|-------------------|----------------|------------------|----------------|-------------------|----------|--------------------|--------------------|----------------|-------------------|--------------------|--------------------|-----------|
| 1  | 148.075690         | 74.541483         |                |                  |                |                   | <b>F</b> |                    |                    |                |                   |                    |                    | <b>20</b> |
| 2  | <b>276.170653</b>  | 138.588964        | 259.144104     | 130.075690       |                |                   | <b>K</b> | 2461.204104        | 1231.105690        | 2444.177555    | 1222.592415       | 2443.193539        | <b>1222.100407</b> | <b>19</b> |
| 3  | <b>389.254717</b>  | <b>195.130996</b> | 372.228168     | 186.617722       |                |                   | <b>L</b> | 2333.109141        | 1167.058208        | 2316.082592    | 1158.544934       | <b>2315.098576</b> | 1158.052926        | <b>18</b> |
| 4  | 504.281660         | 252.644468        | 487.255111     | 244.131193       | 486.271095     | 243.639186        | <b>D</b> | <b>2220.025077</b> | <b>1110.516176</b> | 2202.998528    | 1102.002902       | 2202.014512        | 1101.510894        | <b>17</b> |
| 5  | 619.308603         | <b>310.157940</b> | 602.282054     | 301.644665       | 601.298038     | 301.152657        | <b>D</b> | <b>2104.998134</b> | <b>1053.002705</b> | 2087.971585    | 1044.489430       | 2086.987569        | 1043.997422        | <b>16</b> |
| 6  | 734.335546         | 367.671411        | 717.308997     | 359.158137       | 716.324981     | 358.666129        | <b>D</b> | 1989.971191        | 995.489233         | 1972.944642    | 986.975959        | 1971.960626        | 986.483951         | <b>15</b> |
| 7  | 847.419610         | 424.213443        | 830.393061     | 415.700169       | 829.409045     | 415.208161        | <b>L</b> | 1874.944248        | 937.975762         | 1857.917699    | <b>929.462487</b> | 1856.933683        | <b>928.970479</b>  | <b>14</b> |
| 8  | <b>976.462203</b>  | 488.734740        | 959.435654     | 480.221465       | 958.451638     | 479.729457        | <b>E</b> | 1761.860184        | <b>881.433730</b>  | 1744.833635    | 872.920455        | <b>1743.849619</b> | 872.428447         | <b>13</b> |
| 9  | 1113.521115        | 557.264196        | 1096.494566    | 548.750921       | 1095.510550    | 548.258913        | <b>H</b> | 1632.817591        | <b>816.912433</b>  | 1615.791042    | 808.399159        | 1614.807026        | <b>807.907151</b>  | <b>12</b> |
| 10 | 1552.746441        | 776.876859        | 1535.719892    | 768.363584       | 1534.735876    | 767.871576        | <b>Q</b> | <b>1495.758679</b> | <b>748.382977</b>  | 1478.732130    | 739.869703        | 1477.748114        | 739.377695         | <b>11</b> |
| 11 | 1609.767905        | <b>805.387590</b> | 1592.741356    | 796.874316       | 1591.757340    | 796.382308        | <b>G</b> | <b>1056.533353</b> | 528.770314         | 1039.506804    | 520.257040        | <b>1038.522788</b> | 519.765032         | <b>10</b> |
| 12 | 1666.789369        | 833.898322        | 1649.762820    | 825.385048       | 1648.778804    | 824.893040        | <b>G</b> | <b>999.511889</b>  | 500.259582         | 982.485340     | 491.746308        | 981.501324         | 491.254300         | <b>9</b>  |
| 13 | 1803.848281        | <b>902.427778</b> | 1786.821732    | 893.914504       | 1785.837716    | 893.422496        | <b>H</b> | <b>942.490425</b>  | 471.748850         | 925.463876     | 463.235576        | 924.479860         | 462.743568         | <b>8</b>  |
| 14 | <b>1902.916695</b> | 951.961985        | 1885.890146    | 943.448711       | 1884.906130    | 942.956703        | <b>V</b> | <b>805.431513</b>  | 403.219394         | 788.404964     | 394.706120        | 787.420948         | 394.214112         | <b>7</b>  |
| 15 | 2016.000759        | 1008.504017       | 1998.974210    | 999.990743       | 1997.990194    | <b>999.498735</b> | <b>L</b> | <b>706.363099</b>  | 353.685187         | 689.336550     | 345.171913        | <b>688.352534</b>  | 344.679905         | <b>6</b>  |
| 16 | <b>2131.027702</b> | 1066.017489       | 2114.001153    | 1057.504214      | 2113.017137    | 1057.012206       | <b>D</b> | <b>593.279035</b>  | 297.143155         | 576.252486     | 288.629881        | <b>575.268470</b>  | 288.137873         | <b>5</b>  |
| 17 | 2268.086614        | 1134.546945       | 2251.060065    | 1126.033670      | 2250.076049    | 1125.541662       | <b>H</b> | <b>478.252092</b>  | 239.629684         | 461.225543     | <b>231.116409</b> |                    |                    | <b>4</b>  |
| 18 | 2325.108078        | 1163.057677       | 2308.081529    | 1154.544402      | 2307.097513    | 1154.052394       | <b>G</b> | <b>341.193180</b>  | 171.100228         | 324.166631     | 162.586953        |                    |                    | <b>3</b>  |
| 19 | 2462.166990        | 1231.587133       | 2445.140441    | 1223.073858      | 2444.156425    | 1222.581850       | <b>H</b> | <b>284.171716</b>  | 142.589496         | 267.145167     | 134.076221        |                    |                    | <b>2</b>  |
| 20 |                    |                   |                |                  |                |                   | <b>K</b> | <b>147.112804</b>  | 74.060040          | 130.086255     | 65.546765         |                    |                    | <b>1</b>  |

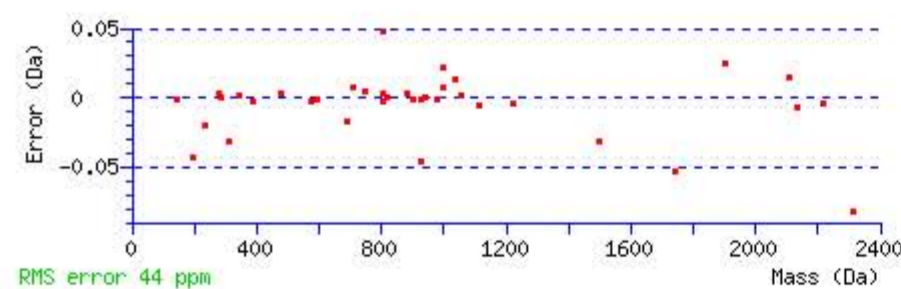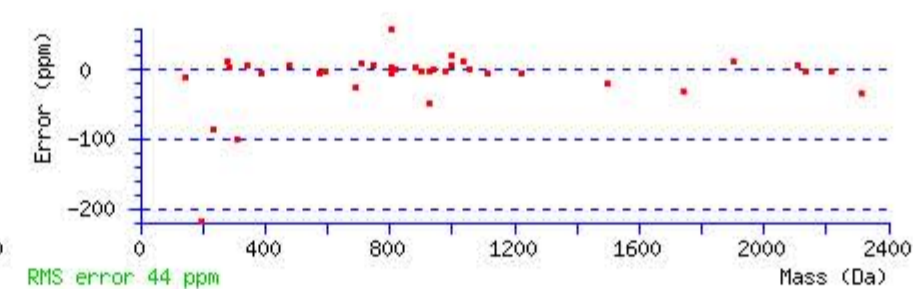

NCBI BLAST search of **FKLDDDDLEHQQGGHVLDDHGHK**  
 (Parameters: blastp, nr protein database, expect=20000, no filter, PAM30)  
 Other BLAST [web gateways](#)

## All matches to this query

| Score | Mr(calc):   | Delta     | Sequence                                |
|-------|-------------|-----------|-----------------------------------------|
| 38.8  | 2607.265259 | -0.004763 | <a href="#">FKLDDDDLEHQQGGHVLDDHGHK</a> |

# MASCOT Search Results

## Peptide View

MS/MS Fragmentation of **FSVATQTCQITPAEGPVVTAQYDCLGCVHPISTQSPDLEPILR**  
Found in **KNG1\_HUMAN**, Kininogen-1 OS=Homo sapiens GN=KNG1 PE=1 SV=2

Match to Query 67670: 5066.469570 from(1014.301190,5+) rtinseconds(2672) index(35656)  
Title: Locus:1.1.1.3593.15 File:"2013-07-02 CLN FXIII 180 min 3rd F 3.wiff"  
Data file C:\Program Files (x86)\Matrix Science\Mascot Daemon\mgf\9 FXIII 180 min 3rd\mascot\_daemon\_merge.mgf

Click mouse within plot area to zoom in by factor of two about that point

Or, Plot from  to  Da Full range

Label all possible matches  Label matches used for scoring

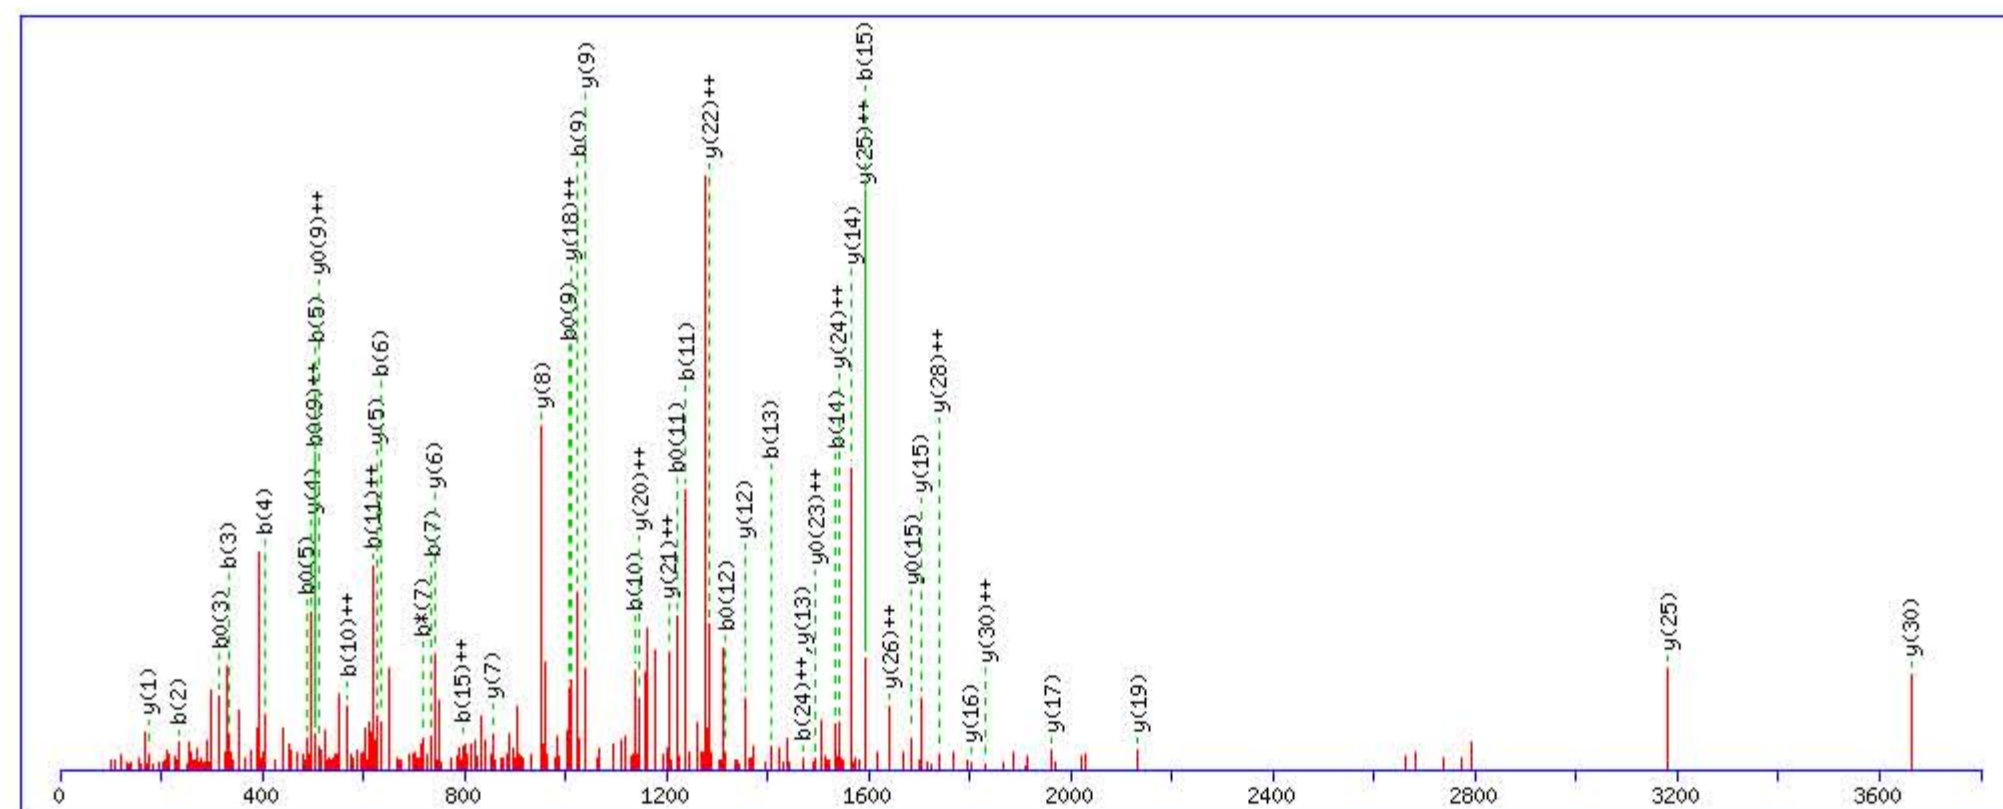

Monoisotopic mass of neutral peptide Mr(calc): 5066.465057  
Fixed modifications: Carbamidomethyl (C) (apply to specified residues or termini only)  
Variable modifications:  
Q21 : Biotin:Thermo-21345 (Q)  
Ions Score: 59 Expect: 2.5e-005  
Matches : 51/484 fragment ions using 140 most intense peaks (help)

| #  | b                  | b <sup>++</sup>    | b <sup>*</sup>    | b <sup>*++</sup> | b <sup>0</sup>     | b <sup>0++</sup>  | Seq.     | y                  | y <sup>++</sup>    | y <sup>*</sup> | y <sup>*++</sup> | y <sup>0</sup>     | y <sup>0++</sup>   | #         |
|----|--------------------|--------------------|-------------------|------------------|--------------------|-------------------|----------|--------------------|--------------------|----------------|------------------|--------------------|--------------------|-----------|
| 1  | 148.075690         | 74.541483          |                   |                  |                    |                   | <b>F</b> |                    |                    |                |                  |                    |                    | <b>43</b> |
| 2  | <b>235.107718</b>  | 118.057497         |                   |                  | 217.097153         | 109.052214        | <b>S</b> | 4920.403881        | 2460.705578        | 4903.377332    | 2452.192304      | 4902.393316        | 2451.700296        | <b>42</b> |
| 3  | <b>334.176132</b>  | 167.591704         |                   |                  | <b>316.165567</b>  | 158.586422        | <b>V</b> | 4833.371853        | 2417.189565        | 4816.345304    | 2408.676290      | 4815.361288        | 2408.184282        | <b>41</b> |
| 4  | <b>405.213246</b>  | 203.110261         |                   |                  | 387.202681         | 194.104978        | <b>A</b> | 4734.303439        | 2367.655357        | 4717.276890    | 2359.142083      | 4716.292874        | 2358.650075        | <b>40</b> |
| 5  | <b>506.260925</b>  | 253.634100         |                   |                  | <b>488.250360</b>  | 244.628818        | <b>T</b> | 4663.266325        | 2332.136800        | 4646.239776    | 2323.623526      | 4645.255760        | 2323.131518        | <b>39</b> |
| 6  | <b>634.319503</b>  | 317.663390         | 617.292954        | 309.150115       | 616.308938         | 308.658107        | <b>Q</b> | 4562.218646        | 2281.612961        | 4545.192097    | 2273.099686      | 4544.208081        | 2272.607679        | <b>38</b> |
| 7  | <b>735.367182</b>  | 368.187229         | <b>718.340633</b> | 359.673955       | 717.356617         | 359.181947        | <b>T</b> | 4434.160068        | 2217.583672        | 4417.133519    | 2209.070397      | 4416.149503        | 2208.578390        | <b>37</b> |
| 8  | 895.397831         | 448.202554         | 878.371282        | 439.689279       | 877.387266         | 439.197271        | <b>C</b> | 4333.112389        | 2167.059833        | 4316.085840    | 2158.546558      | 4315.101824        | 2158.054550        | <b>36</b> |
| 9  | <b>1023.456409</b> | 512.231843         | 1006.429860       | 503.718568       | <b>1005.445844</b> | <b>503.226560</b> | <b>Q</b> | 4173.081740        | 2087.044508        | 4156.055191    | 2078.531233      | 4155.071175        | 2078.039226        | <b>35</b> |
| 10 | <b>1136.540473</b> | <b>568.773875</b>  | 1119.513924       | 560.260600       | 1118.529908        | 559.768592        | <b>I</b> | 4045.023162        | 2023.015219        | 4027.996613    | 2014.501944      | 4027.012597        | 2014.009936        | <b>34</b> |
| 11 | <b>1237.588152</b> | <b>619.297714</b>  | 1220.561603       | 610.784440       | <b>1219.577587</b> | 610.292432        | <b>T</b> | 3931.939098        | 1966.473187        | 3914.912549    | 1957.959912      | 3913.928533        | 1957.467904        | <b>33</b> |
| 12 | 1334.640916        | 667.824096         | 1317.614367       | 659.310822       | <b>1316.630351</b> | 658.818814        | <b>P</b> | 3830.891419        | 1915.949347        | 3813.864870    | 1907.436073      | 3812.880854        | 1906.944065        | <b>32</b> |
| 13 | <b>1405.678030</b> | 703.342653         | 1388.651481       | 694.829379       | 1387.667465        | 694.337371        | <b>A</b> | 3733.838655        | 1867.422965        | 3716.812106    | 1858.909691      | 3715.828090        | 1858.417683        | <b>31</b> |
| 14 | <b>1534.720623</b> | 767.863949         | 1517.694074       | 759.350675       | 1516.710058        | 758.858667        | <b>E</b> | <b>3662.801541</b> | <b>1831.904408</b> | 3645.774992    | 1823.391134      | 3644.790976        | 1822.899126        | <b>30</b> |
| 15 | <b>1591.742087</b> | <b>796.374681</b>  | 1574.715538       | 787.861407       | 1573.731522        | 787.369399        | <b>G</b> | 3533.758948        | 1767.383112        | 3516.732399    | 1758.869837      | 3515.748383        | 1758.377829        | <b>29</b> |
| 16 | 1688.794851        | 844.901063         | 1671.768302       | 836.387789       | 1670.784286        | 835.895781        | <b>P</b> | 3476.737484        | <b>1738.872380</b> | 3459.710935    | 1730.359105      | 3458.726919        | 1729.867097        | <b>28</b> |
| 17 | 1787.863265        | 894.435271         | 1770.836716       | 885.921996       | 1769.852700        | 885.429988        | <b>V</b> | 3379.684720        | 1690.345998        | 3362.658171    | 1681.832723      | 3361.674155        | 1681.340715        | <b>27</b> |
| 18 | 1886.931679        | 943.969478         | 1869.905130       | 935.456203       | 1868.921114        | 934.964195        | <b>V</b> | 3280.616306        | <b>1640.811791</b> | 3263.589757    | 1632.298516      | 3262.605741        | 1631.806508        | <b>26</b> |
| 19 | 1987.979358        | 994.493317         | 1970.952809       | 985.980043       | 1969.968793        | 985.488035        | <b>T</b> | <b>3181.547892</b> | <b>1591.277584</b> | 3164.521343    | 1582.764309      | 3163.537327        | 1582.272301        | <b>25</b> |
| 20 | 2059.016472        | 1030.011874        | 2041.989923       | 1021.498600      | 2041.005907        | 1021.006591       | <b>A</b> | 3080.500213        | <b>1540.753744</b> | 3063.473664    | 1532.240470      | 3062.489648        | 1531.748462        | <b>24</b> |
| 21 | 2498.241798        | 1249.624537        | 2481.215249       | 1241.111262      | 2480.231233        | 1240.619254       | <b>Q</b> | 3009.463099        | 1505.235187        | 2992.436550    | 1496.721913      | 2991.452534        | <b>1496.229905</b> | <b>23</b> |
| 22 | 2661.305127        | 1331.156202        | 2644.278578       | 1322.642927      | 2643.294562        | 1322.150919       | <b>Y</b> | 2570.237773        | <b>1285.622524</b> | 2553.211224    | 1277.109250      | 2552.227208        | 1276.617242        | <b>22</b> |
| 23 | 2776.332070        | 1388.669673        | 2759.305521       | 1380.156398      | 2758.321505        | 1379.664390       | <b>D</b> | 2407.174444        | <b>1204.090860</b> | 2390.147895    | 1195.577585      | 2389.163879        | 1195.085577        | <b>21</b> |
| 24 | 2936.362719        | <b>1468.684997</b> | 2919.336170       | 1460.171723      | 2918.352154        | 1459.679715       | <b>C</b> | 2292.147501        | <b>1146.577388</b> | 2275.120952    | 1138.064114      | 2274.136936        | 1137.572106        | <b>20</b> |
| 25 | 3049.446783        | 1525.227029        | 3032.420234       | 1516.713755      | 3031.436218        | 1516.221747       | <b>L</b> | <b>2132.116852</b> | 1066.562064        | 2115.090303    | 1058.048789      | 2114.106287        | 1057.556781        | <b>19</b> |
| 26 | 3106.468247        | 1553.737761        | 3089.441698       | 1545.224487      | 3088.457682        | 1544.732479       | <b>G</b> | 2019.032788        | <b>1010.020032</b> | 2002.006239    | 1001.506757      | 2001.022223        | 1001.014749        | <b>18</b> |
| 27 | 3266.498896        | 1633.753086        | 3249.472347       | 1625.239811      | 3248.488331        | 1624.747803       | <b>C</b> | <b>1962.011324</b> | 981.509300         | 1944.984775    | 972.996025       | 1944.000759        | 972.504017         | <b>17</b> |
| 28 | 3365.567310        | 1683.287293        | 3348.540761       | 1674.774018      | 3347.556745        | 1674.282010       | <b>V</b> | <b>1801.980675</b> | 901.493975         | 1784.954126    | 892.980701       | 1783.970110        | 892.488693         | <b>16</b> |
| 29 | 3502.626222        | 1751.816749        | 3485.599673       | 1743.303474      | 3484.615657        | 1742.811466       | <b>H</b> | <b>1702.912261</b> | 851.959768         | 1685.885712    | 843.446494       | <b>1684.901696</b> | 842.954486         | <b>15</b> |
| 30 | 3599.678986        | 1800.343131        | 3582.652437       | 1791.829856      | 3581.668421        | 1791.337848       | <b>P</b> | <b>1565.853349</b> | 783.430312         | 1548.826800    | 774.917038       | 1547.842784        | 774.425030         | <b>14</b> |
| 31 | 3712.763050        | 1856.885163        | 3695.736501       | 1848.371888      | 3694.752485        | 1847.879880       | <b>I</b> | <b>1468.800585</b> | 734.903930         | 1451.774036    | 726.390656       | 1450.790020        | 725.898648         | <b>13</b> |
| 32 | 3799.795078        | 1900.401177        | 3782.768529       | 1891.887902      | 3781.784513        | 1891.395894       | <b>S</b> | <b>1355.716521</b> | 678.361898         | 1338.689972    | 669.848624       | 1337.705956        | 669.356616         | <b>12</b> |
| 33 | 3900.842757        | 1950.925016        | 3883.816208       | 1942.411742      | 3882.832192        | 1941.919734       | <b>T</b> | 1268.684493        | 634.845884         | 1251.657944    | 626.332610       | 1250.673928        | 625.840602         | <b>11</b> |
| 34 | 4028.901335        | 2014.954305        | 4011.874786       | 2006.441031      | 4010.890770        | 2005.949023       | <b>Q</b> | 1167.636814        | 584.322045         | 1150.610265    | 575.808770       | 1149.626249        | 575.316762         | <b>10</b> |
| 35 | 4115.933363        | 2058.470320        | 4098.906814       | 2049.957045      | 4097.922798        | 2049.465037       | <b>S</b> | <b>1039.578236</b> | 520.292756         | 1022.551687    | 511.779481       | 1021.567671        | <b>511.287473</b>  | <b>9</b>  |
| 36 | 4212.986127        | 2106.996702        | 4195.959578       | 2098.483427      | 4194.975562        | 2097.991419       | <b>P</b> | <b>952.546208</b>  | 476.776742         | 935.519659     | 468.263467       | 934.535643         | 467.771459         | <b>8</b>  |
| 37 | 4328.013070        | 2164.510173        | 4310.986521       | 2155.996899      | 4310.002505        | 2155.504891       | <b>D</b> | <b>855.493444</b>  | 428.250360         | 838.466895     | 419.737085       | 837.482879         | 419.245077         | <b>7</b>  |
| 38 | 4441.097134        | 2221.052205        | 4424.070585       | 2212.538930      | 4423.086569        | 2212.046923       | <b>L</b> | <b>740.466501</b>  | 370.736888         | 723.439952     | 362.223614       | 722.455936         | 361.731606         | <b>6</b>  |
| 39 | 4570.139727        | 2285.573502        | 4553.113178       | 2277.060227      | 4552.129162        | 2276.568219       | <b>E</b> | <b>627.382437</b>  | 314.194856         | 610.355888     | 305.681582       | 609.371872         | 305.189574         | <b>5</b>  |
| 40 | 4667.192491        | 2334.099884        | 4650.165942       | 2325.586609      | 4649.181926        | 2325.094601       | <b>P</b> | <b>498.339844</b>  | 249.673560         | 481.313295     | 241.160285       |                    |                    | <b>4</b>  |
| 41 | 4780.276555        | 2390.641915        | 4763.250006       | 2382.128641      | 4762.265990        | 2381.636633       | <b>I</b> | 401.287080         | 201.147178         | 384.260531     | 192.633903       |                    |                    | <b>3</b>  |
| 42 | 4893.360619        | 2447.183947        | 4876.334070       | 2438.670673      | 4875.350054        | 2438.178665       | <b>L</b> | 288.203016         | 144.605146         | 271.176467     | 136.091871       |                    |                    | <b>2</b>  |
| 43 |                    |                    |                   |                  |                    |                   | <b>R</b> | <b>175.118952</b>  | 88.063114          | 158.092403     | 79.549839        |                    |                    | <b>1</b>  |

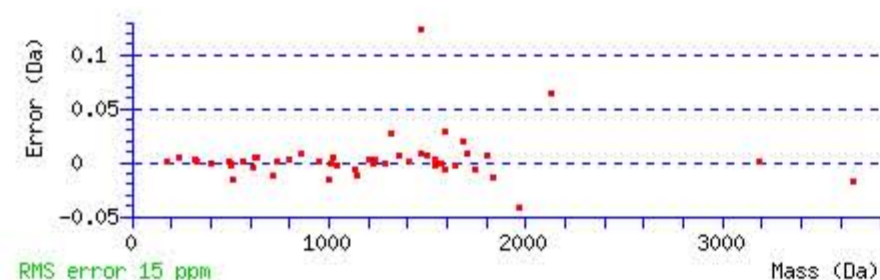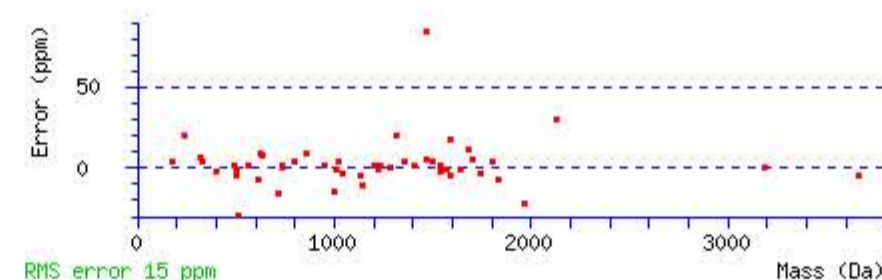

NCBI BLAST search of **FSVATQTCQITPAEGPVVTAQYDCLGCVHPISTQSPDLEPILR**  
(Parameters: blastp, nr protein database, expect=20000, no filter, PAM30)  
Other BLAST [web gateways](#)

### All matches to this query

| Score | Mr(calc):   | Delta    | Sequence                                                    |
|-------|-------------|----------|-------------------------------------------------------------|
| 58.6  | 5066.465057 | 0.004513 | <a href="#">FSVATQTCQITPAEGPVVTAQYDCLGCVHPISTQSPDLEPILR</a> |
| 21.8  | 5066.465057 | 0.004513 | <a href="#">FSVATQTCQITPAEGPVVTAQYDCLGCVHPISTQSPDLEPILR</a> |
| 21.8  | 5066.465057 | 0.004513 | <a href="#">FSVATQTCQITPAEGPVVTAQYDCLGCVHPISTQSPDLEPILR</a> |
| 21.1  | 5066.465057 | 0.004513 | <a href="#">FSVATQTCQITPAEGPVVTAQYDCLGCVHPISTQSPDLEPILR</a> |



# MASCOT SCIENCE Mascot Search Results

## Peptide View

MS/MS Fragmentation of **SLEYLDLSFNQIAR**

Found in **LUM\_HUMAN**, Lumican OS=Homo sapiens GN=LUM PE=1 SV=2

Match to Query 38944: 1979.026212 from(660.682680,3+) rtinseconds(2763) index(50466)

Title: Locus:1.1.1.3673.9 File:"2013-07-02 CLN FXIII 180 min 3rd F 4.wiff"

Data file C:\Program Files (x86)\Matrix Science\Mascot Daemon\mgf\9 FXIII 180 min 3rd\mascot\_daemon\_merge.mgf

Click mouse within plot area to zoom in by factor of two about that point

Or, Plot from  to  Da

Label all possible matches  Label matches used for scoring

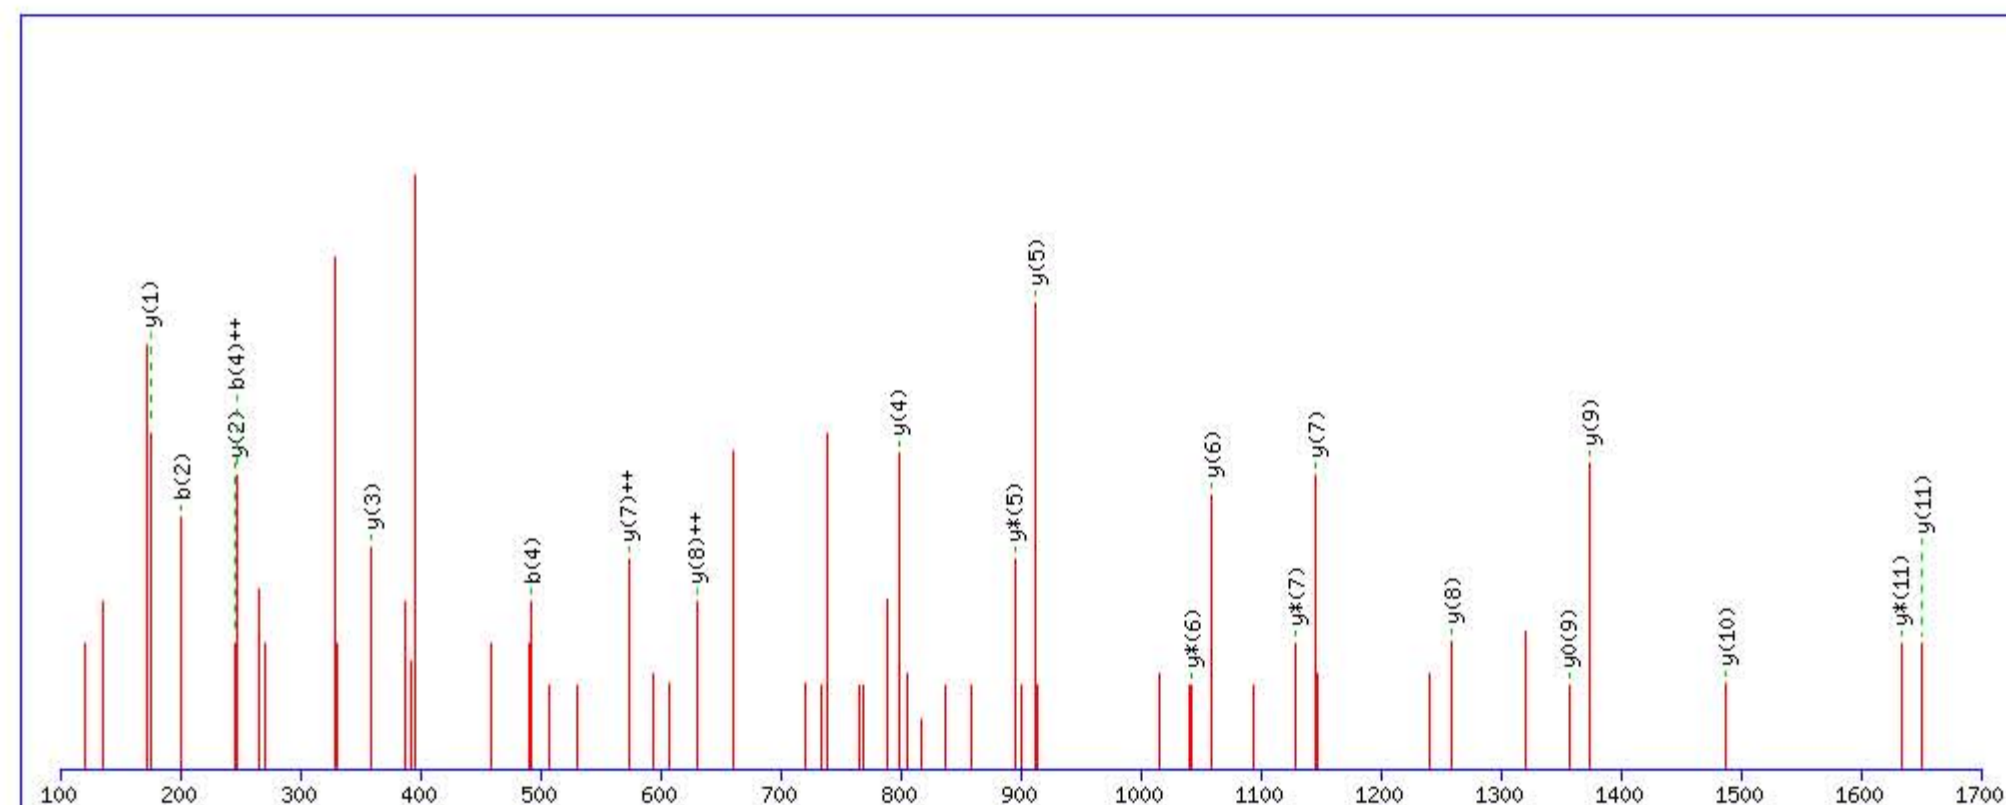

Monoisotopic mass of neutral peptide Mr(calc): 1979.018600

Fixed modifications: Carbamidomethyl (C) (apply to specified residues or termini only)

Variable modifications:

Q11 : Biotin:Thermo-21345 (Q)

Ions Score: 68 Expect: 6.9e-007

Matches : 21/126 fragment ions using 38 most intense peaks [\(help\)](#)

| #  | b                 | b <sup>++</sup>   | b <sup>*</sup> | b <sup>*++</sup> | b <sup>0</sup> | b <sup>0++</sup> | Seq. | y                  | y <sup>++</sup>   | y <sup>*</sup>     | y <sup>*++</sup> | y <sup>0</sup>     | y <sup>0++</sup> | #  |
|----|-------------------|-------------------|----------------|------------------|----------------|------------------|------|--------------------|-------------------|--------------------|------------------|--------------------|------------------|----|
| 1  | 88.039304         | 44.523290         |                |                  | 70.028739      | 35.518008        | S    |                    |                   |                    |                  |                    |                  | 14 |
| 2  | <b>201.123368</b> | 101.065322        |                |                  | 183.112803     | 92.060039        | L    | 1892.993882        | 947.000579        | 1875.967333        | 938.487305       | 1874.983317        | 937.995296       | 13 |
| 3  | 330.165961        | 165.586618        |                |                  | 312.155396     | 156.581336       | E    | 1779.909818        | 890.458547        | 1762.883269        | 881.945273       | 1761.899253        | 881.453265       | 12 |
| 4  | <b>493.229290</b> | <b>247.118283</b> |                |                  | 475.218725     | 238.113001       | Y    | <b>1650.867225</b> | 825.937251        | <b>1633.840676</b> | 817.423976       | 1632.856660        | 816.931968       | 11 |
| 5  | 606.313354        | 303.660315        |                |                  | 588.302789     | 294.655033       | L    | <b>1487.803896</b> | 744.405586        | 1470.777347        | 735.892312       | 1469.793331        | 735.400304       | 10 |
| 6  | 721.340297        | 361.173787        |                |                  | 703.329732     | 352.168504       | D    | <b>1374.719832</b> | 687.863554        | 1357.693283        | 679.350280       | <b>1356.709267</b> | 678.858272       | 9  |
| 7  | 834.424361        | 417.715819        |                |                  | 816.413796     | 408.710536       | L    | <b>1259.692889</b> | <b>630.350083</b> | 1242.666340        | 621.836808       | 1241.682324        | 621.344800       | 8  |
| 8  | 921.456389        | 461.231833        |                |                  | 903.445824     | 452.226550       | S    | <b>1146.608825</b> | <b>573.808051</b> | <b>1129.582276</b> | 565.294776       | 1128.598260        | 564.802768       | 7  |
| 9  | 1068.524803       | 534.766040        |                |                  | 1050.514238    | 525.760757       | F    | <b>1059.576797</b> | 530.292037        | <b>1042.550248</b> | 521.778762       |                    |                  | 6  |
| 10 | 1182.567730       | 591.787503        | 1165.541181    | 583.274229       | 1164.557165    | 582.782220       | N    | <b>912.508383</b>  | 456.757830        | <b>895.481834</b>  | 448.244555       |                    |                  | 5  |
| 11 | 1621.793056       | 811.400166        | 1604.766507    | 802.886892       | 1603.782491    | 802.394884       | Q    | <b>798.465456</b>  | 399.736366        | 781.438907         | 391.223092       |                    |                  | 4  |
| 12 | 1734.877120       | 867.942198        | 1717.850571    | 859.428924       | 1716.866555    | 858.936916       | I    | <b>359.240130</b>  | 180.123703        | 342.213581         | 171.610428       |                    |                  | 3  |
| 13 | 1805.914234       | 903.460755        | 1788.887685    | 894.947481       | 1787.903669    | 894.455473       | A    | <b>246.156066</b>  | 123.581671        | 229.129517         | 115.068396       |                    |                  | 2  |
| 14 |                   |                   |                |                  |                |                  | R    | <b>175.118952</b>  | 88.063114         | 158.092403         | 79.549839        |                    |                  | 1  |

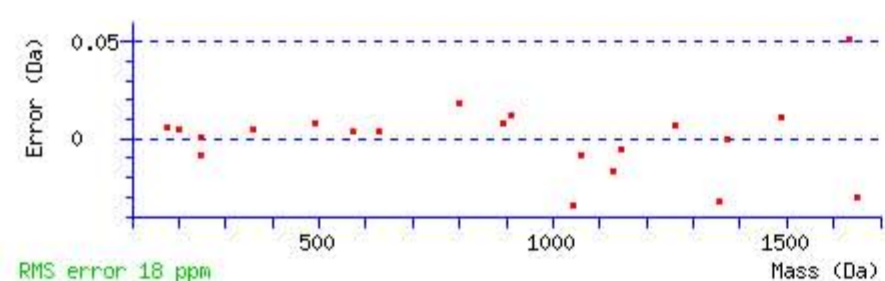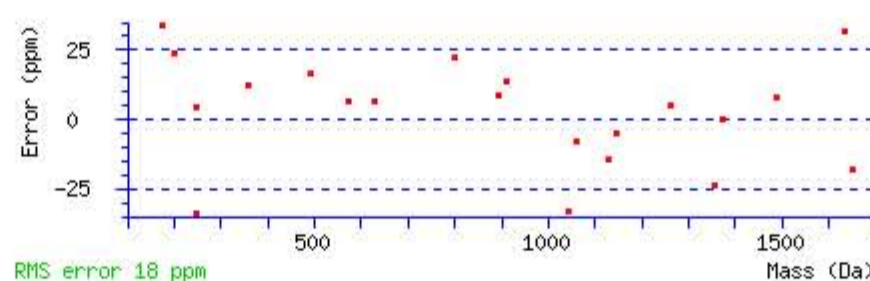

NCBI BLAST search of [SLEYLDLSFNQIAR](#)

(Parameters: blastp, nr protein database, expect=20000, no filter, PAM30)

Other BLAST [web gateways](#)

All matches to this query

| Score | Mr(calc):   | Delta    | Sequence                          |
|-------|-------------|----------|-----------------------------------|
| 67.5  | 1979.018600 | 0.007612 | <a href="#">SLEYLDLSFNQIAR</a>    |
| 1.8   | 1979.025787 | 0.000425 | <a href="#">HQNLQEKLAEEMLGLAR</a> |

Mascot: <http://www.matrixscience.com/>

**Peptide View**

MS/MS Fragmentation of **NIPTVNENLENYYLEVNQLEK**  
 Found in **LUM\_HUMAN**, Lumican OS=Homo sapiens GN=LUM PE=1 SV=2

Match to Query 52172: 2846.425182 from(949.815670,3+) rtinseconds(2694) index(50015)  
 Title: Locus:1.1.1.3649.22 File:"2013-07-02 CLN FXIII 180 min 3rd F 4.wiff"  
 Data file C:\Program Files (x86)\Matrix Science\Mascot Daemon\mgf9 FXIII 180 min 3rd\mascot\_daemon\_merge.mgf

Click mouse within plot area to zoom in by factor of two about that point  
 Or, Plot from 0 to 2800 Da Full range  
 Label all possible matches  Label matches used for scoring

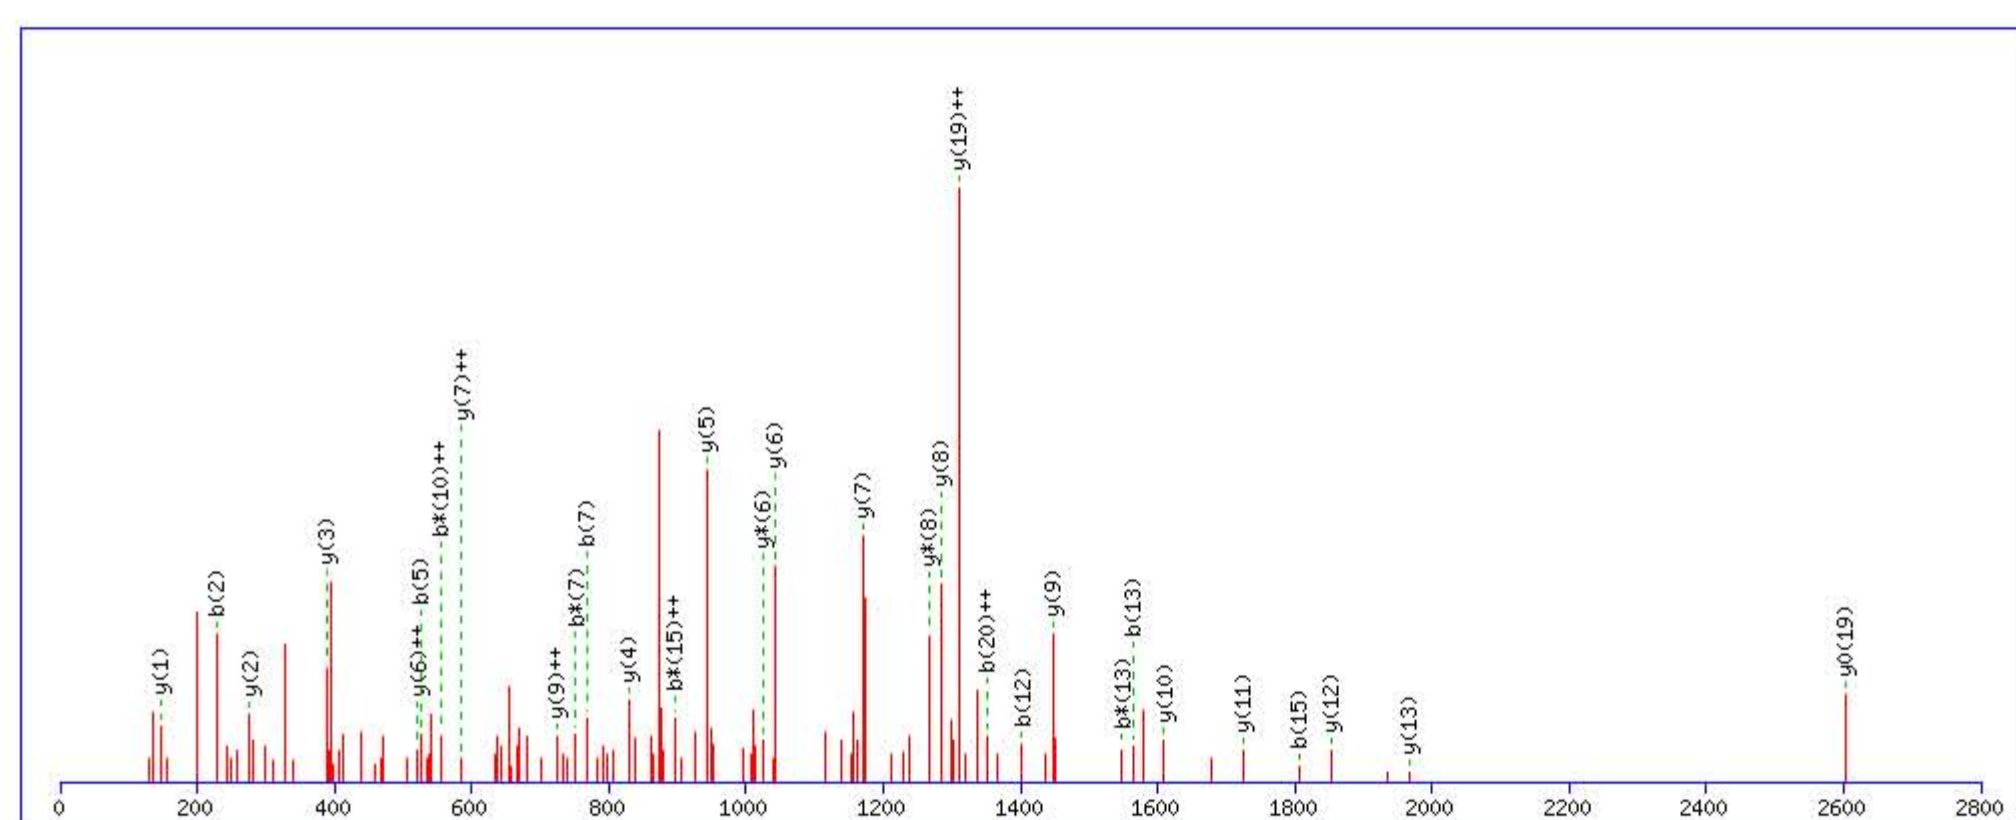

Monoisotopic mass of neutral peptide Mr(calc): 2846.415985  
 Fixed modifications: Carbamidomethyl (C) (apply to specified residues or termini only)  
 Variable modifications:  
 Q18 : Biotin:Thermo-21345 (Q)  
 Ions Score: 58 Expect: 4.6e-005  
 Matches : 31/232 fragment ions using 66 most intense peaks ([help](#))

| #  | b                  | b <sup>++</sup>    | b <sup>*</sup>     | b <sup>*++</sup>  | b <sup>0</sup> | b <sup>0++</sup> | Seq. | y                  | y <sup>++</sup>    | y <sup>*</sup>     | y <sup>*++</sup> | y <sup>0</sup>     | y <sup>0++</sup> | #  |
|----|--------------------|--------------------|--------------------|-------------------|----------------|------------------|------|--------------------|--------------------|--------------------|------------------|--------------------|------------------|----|
| 1  | 115.050203         | 58.028740          | 98.023654          | 49.515465         |                |                  | N    |                    |                    |                    |                  |                    |                  | 21 |
| 2  | <b>228.134267</b>  | 114.570771         | 211.107718         | 106.057497        |                |                  | I    | 2733.380395        | 1367.193835        | 2716.353846        | 1358.680561      | 2715.369830        | 1358.188553      | 20 |
| 3  | 325.187031         | 163.097153         | 308.160482         | 154.583879        |                |                  | P    | 2620.296331        | <b>1310.651803</b> | 2603.269782        | 1302.138529      | <b>2602.285766</b> | 1301.646521      | 19 |
| 4  | 426.234710         | 213.620993         | 409.208161         | 205.107719        | 408.224145     | 204.615711       | T    | 2523.243567        | 1262.125421        | 2506.217018        | 1253.612147      | 2505.233002        | 1253.120139      | 18 |
| 5  | <b>525.303124</b>  | 263.155200         | 508.276575         | 254.641926        | 507.292559     | 254.149918       | V    | 2422.195888        | 1211.601582        | 2405.169339        | 1203.088307      | 2404.185323        | 1202.596299      | 17 |
| 6  | 639.346051         | 320.176664         | 622.319502         | 311.663389        | 621.335486     | 311.171381       | N    | 2323.127474        | 1162.067375        | 2306.100925        | 1153.554100      | 2305.116909        | 1153.062092      | 16 |
| 7  | <b>768.388644</b>  | 384.697960         | <b>751.362095</b>  | 376.184686        | 750.378079     | 375.692678       | E    | 2209.084547        | 1105.045911        | 2192.057998        | 1096.532637      | 2191.073982        | 1096.040629      | 15 |
| 8  | 882.431571         | 441.719424         | 865.405022         | 433.206149        | 864.421006     | 432.714141       | N    | 2080.041954        | 1040.524615        | 2063.015405        | 1032.011340      | 2062.031389        | 1031.519332      | 14 |
| 9  | 995.515635         | 498.261456         | 978.489086         | 489.748181        | 977.505070     | 489.256173       | L    | <b>1965.999027</b> | 983.503152         | 1948.972478        | 974.989877       | 1947.988462        | 974.497869       | 13 |
| 10 | 1124.558228        | 562.782752         | 1107.531679        | <b>554.269478</b> | 1106.547663    | 553.777470       | E    | <b>1852.914963</b> | 926.961120         | 1835.888414        | 918.447845       | 1834.904398        | 917.955837       | 12 |
| 11 | 1238.601155        | 619.804216         | 1221.574606        | 611.290941        | 1220.590590    | 610.798933       | N    | <b>1723.872370</b> | 862.439823         | 1706.845821        | 853.926549       | 1705.861805        | 853.434541       | 11 |
| 12 | <b>1401.664484</b> | 701.335880         | 1384.637935        | 692.822606        | 1383.653919    | 692.330598       | Y    | <b>1609.829443</b> | 805.418360         | 1592.802894        | 796.905085       | 1591.818878        | 796.413077       | 10 |
| 13 | <b>1564.727813</b> | 782.867545         | <b>1547.701264</b> | 774.354270        | 1546.717248    | 773.862262       | Y    | <b>1446.766114</b> | <b>723.886695</b>  | 1429.739565        | 715.373421       | 1428.755549        | 714.881413       | 9  |
| 14 | 1677.811877        | 839.409577         | 1660.785328        | 830.896302        | 1659.801312    | 830.404294       | L    | <b>1283.702785</b> | 642.355031         | <b>1266.676236</b> | 633.841756       | 1265.692220        | 633.349748       | 8  |
| 15 | <b>1806.854470</b> | 903.930873         | 1789.827921        | <b>895.417599</b> | 1788.843905    | 894.925591       | E    | <b>1170.618721</b> | <b>585.812999</b>  | 1153.592172        | 577.299724       | 1152.608156        | 576.807716       | 7  |
| 16 | 1905.922884        | 953.465080         | 1888.896335        | 944.951806        | 1887.912319    | 944.459798       | V    | <b>1041.576128</b> | <b>521.291702</b>  | <b>1024.549579</b> | 512.778428       | 1023.565563        | 512.286420       | 6  |
| 17 | 2019.965811        | 1010.486544        | 2002.939262        | 1001.973269       | 2001.955246    | 1001.481261      | N    | <b>942.507714</b>  | 471.757495         | 925.481165         | 463.244221       | 924.497149         | 462.752213       | 5  |
| 18 | 2459.191137        | 1230.099206        | 2442.164588        | 1221.585932       | 2441.180572    | 1221.093924      | Q    | <b>828.464787</b>  | 414.736032         | 811.438238         | 406.222757       | 810.454222         | 405.730749       | 4  |
| 19 | 2572.275201        | 1286.641238        | 2555.248652        | 1278.127964       | 2554.264636    | 1277.635956      | L    | <b>389.239461</b>  | 195.123369         | 372.212912         | 186.610094       | 371.228896         | 186.118086       | 3  |
| 20 | 2701.317794        | <b>1351.162535</b> | 2684.291245        | 1342.649260       | 2683.307229    | 1342.157252      | E    | <b>276.155397</b>  | 138.581337         | 259.128848         | 130.068062       | 258.144832         | 129.576054       | 2  |
| 21 |                    |                    |                    |                   |                |                  | K    | <b>147.112804</b>  | 74.060040          | 130.086255         | 65.546765        |                    |                  | 1  |

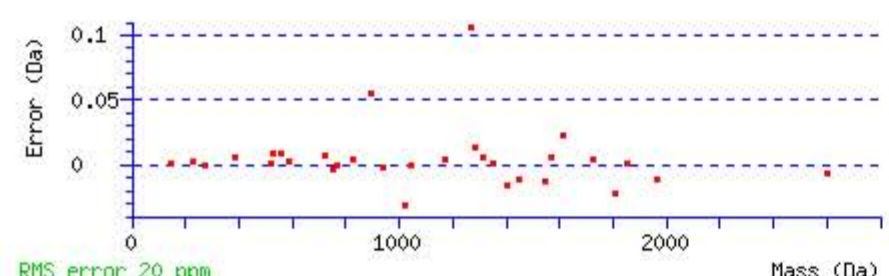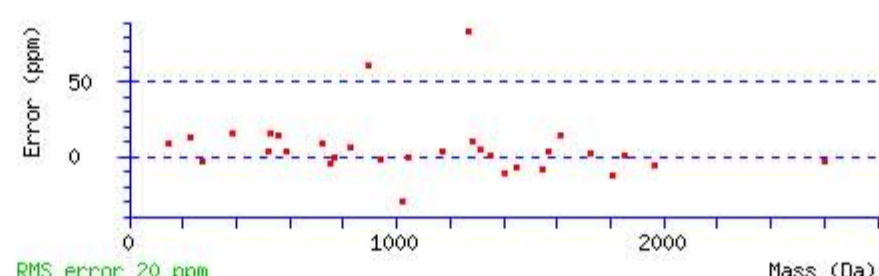

NCBI BLAST search of [NIPTVNENLENYYLEVNQLEK](#)  
 (Parameters: blastp, nr protein database, expect=20000, no filter, PAM30)  
 Other BLAST [web gateways](#)

**All matches to this query**

| Score | Mr(calc):   | Delta    | Sequence                              |
|-------|-------------|----------|---------------------------------------|
| 57.7  | 2846.415985 | 0.009197 | <a href="#">NIPTVNENLENYYLEVNQLEK</a> |

# MASCOT Search Results

## Peptide View

MS/MS Fragmentation of **VECSDNLFTQR**

Found in **MASP1\_HUMAN**, Mannan-binding lectin serine protease 1 OS=Homo sapiens GN=MASP1 PE=1 SV=3

Match to Query 33272: 1678.780212 from(560.600680,3+) rtinseconds(2115) index(46685)

Title: Locus:1.1.1.3449.3 File:"2013-07-02 CLN FXIII 180 min 3rd F 4.wiff"

Data file C:\Program Files (x86)\Matrix Science\Mascot Daemon\mgf9 FXIII 180 min 3rd\mascot\_daemon\_merge.mgf

Click mouse within plot area to zoom in by factor of two about that point

Or, Plot from  to  Da

Label all possible matches  Label matches used for scoring

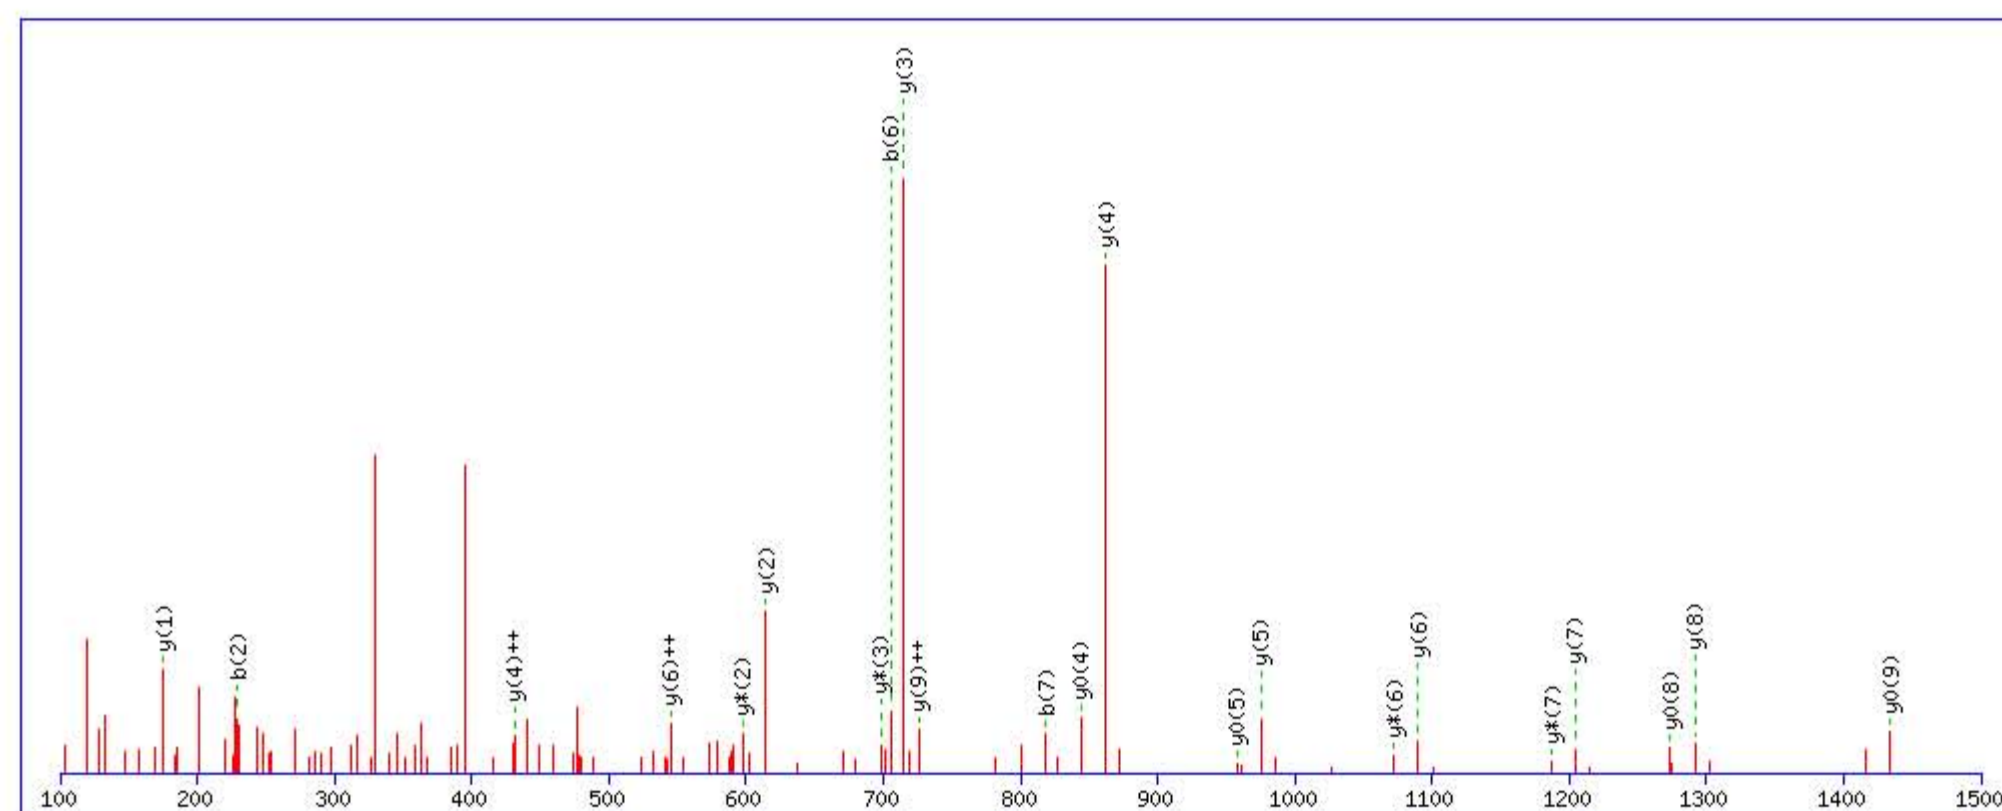

Monoisotopic mass of neutral peptide Mr(calc): 1678.780716

Fixed modifications: Carbamidomethyl (C) (apply to specified residues or termini only)

Variable modifications:

Q10 : Biotin:Thermo-21345 (Q)

Ions Score: 47 Expect: 7.4e-005

Matches : 22/104 fragment ions using 36 most intense peaks [\(help\)](#)

| #  | b                 | b <sup>++</sup> | b <sup>+</sup> | b <sup>*++</sup> | b <sup>0</sup> | b <sup>0++</sup> | Seq. | y                  | y <sup>++</sup>   | y <sup>+</sup>     | y <sup>*++</sup> | y <sup>0</sup>     | y <sup>0++</sup> | #  |
|----|-------------------|-----------------|----------------|------------------|----------------|------------------|------|--------------------|-------------------|--------------------|------------------|--------------------|------------------|----|
| 1  | 100.075690        | 50.541483       |                |                  |                |                  | V    |                    |                   |                    |                  |                    |                  | 11 |
| 2  | <b>229.118283</b> | 115.062780      |                |                  | 211.107718     | 106.057497       | E    | 1580.719575        | 790.863426        | 1563.693026        | 782.350151       | 1562.709010        | 781.858143       | 10 |
| 3  | 389.148932        | 195.078104      |                |                  | 371.138367     | 186.072822       | C    | 1451.676982        | <b>726.342129</b> | 1434.650433        | 717.828855       | <b>1433.666417</b> | 717.336847       | 9  |
| 4  | 476.180960        | 238.594118      |                |                  | 458.170395     | 229.588835       | S    | <b>1291.646333</b> | 646.326805        | 1274.619784        | 637.813530       | <b>1273.635768</b> | 637.321522       | 8  |
| 5  | 591.207903        | 296.107590      |                |                  | 573.197338     | 287.102307       | D    | <b>1204.614305</b> | 602.810791        | <b>1187.587756</b> | 594.297516       | 1186.603740        | 593.805508       | 7  |
| 6  | <b>705.250830</b> | 353.129053      | 688.224281     | 344.615778       | 687.240265     | 344.123770       | N    | <b>1089.587362</b> | <b>545.297319</b> | <b>1072.560813</b> | 536.784045       | 1071.576797        | 536.292037       | 6  |
| 7  | <b>818.334894</b> | 409.671085      | 801.308345     | 401.157810       | 800.324329     | 400.665802       | L    | <b>975.544435</b>  | 488.275856        | 958.517886         | 479.762581       | <b>957.533870</b>  | 479.270573       | 5  |
| 8  | 965.403308        | 483.205292      | 948.376759     | 474.692017       | 947.392743     | 474.200009       | F    | <b>862.460371</b>  | <b>431.733824</b> | 845.433822         | 423.220549       | <b>844.449806</b>  | 422.728541       | 4  |
| 9  | 1066.450987       | 533.729131      | 1049.424438    | 525.215857       | 1048.440422    | 524.723849       | T    | <b>715.391957</b>  | 358.199617        | <b>698.365408</b>  | 349.686342       | 697.381392         | 349.194334       | 3  |
| 10 | 1505.676313       | 753.341795      | 1488.649764    | 744.828520       | 1487.665748    | 744.336512       | Q    | <b>614.344278</b>  | 307.675777        | <b>597.317729</b>  | 299.162503       |                    |                  | 2  |
| 11 |                   |                 |                |                  |                |                  | R    | <b>175.118952</b>  | 88.063114         | 158.092403         | 79.549839        |                    |                  | 1  |

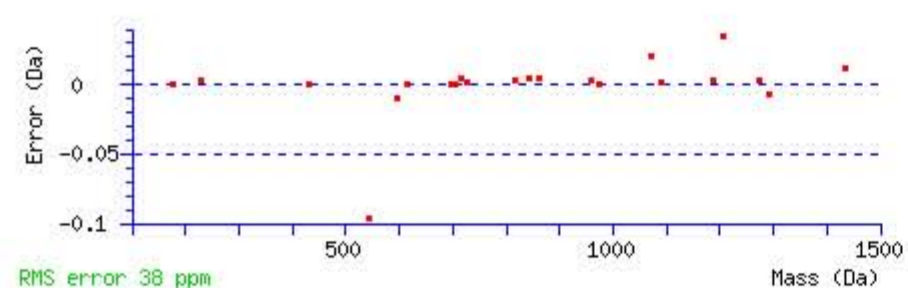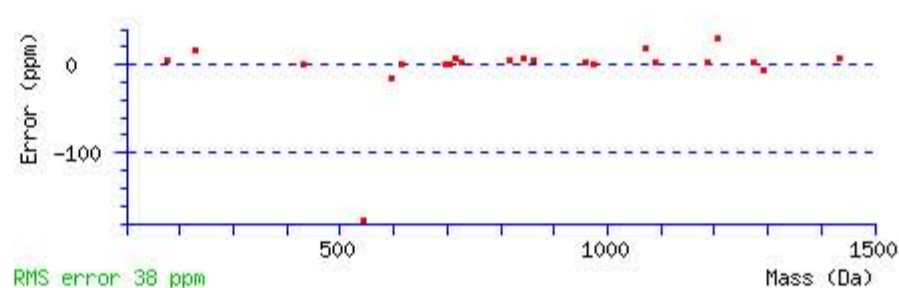

NCBI BLAST search of **VECSDNLFTQR**

(Parameters: blastp, nr protein database, expect=20000, no filter, PAM30)

Other BLAST [web gateways](#)

All matches to this query

| Score | Mr(calc):   | Delta     | Sequence                       |
|-------|-------------|-----------|--------------------------------|
| 47.0  | 1678.780716 | -0.000504 | <a href="#">VECSDNLFTQR</a>    |
| 3.0   | 1678.769455 | 0.010757  | <a href="#">VWDKEGEMEVAMQK</a> |

Mascot: <http://www.matrixscience.com/>

# MASCOT Search Results

## Peptide View

MS/MS Fragmentation of **FPETLMEIEIPIVDHSTCQK**

Found in **MASP1\_HUMAN**, Mannan-binding lectin serine protease 1 OS=Homo sapiens GN=MASP1 PE=1 SV=3

Match to Query 50346: 2697.328992 from(900.116940,3+) rtinseconds(2770) index(50523)

Title: Locus:1.1.1.3675.22 File:"2013-07-02 CLN FXIII 180 min 3rd F 4.wiff"

Data file C:\Program Files (x86)\Matrix Science\Mascot Daemon\mgf\9 FXIII 180 min 3rd\mascot\_daemon\_merge.mgf

Click mouse within plot area to zoom in by factor of two about that point

Or, Plot from  to  Da

Label all possible matches  Label matches used for scoring

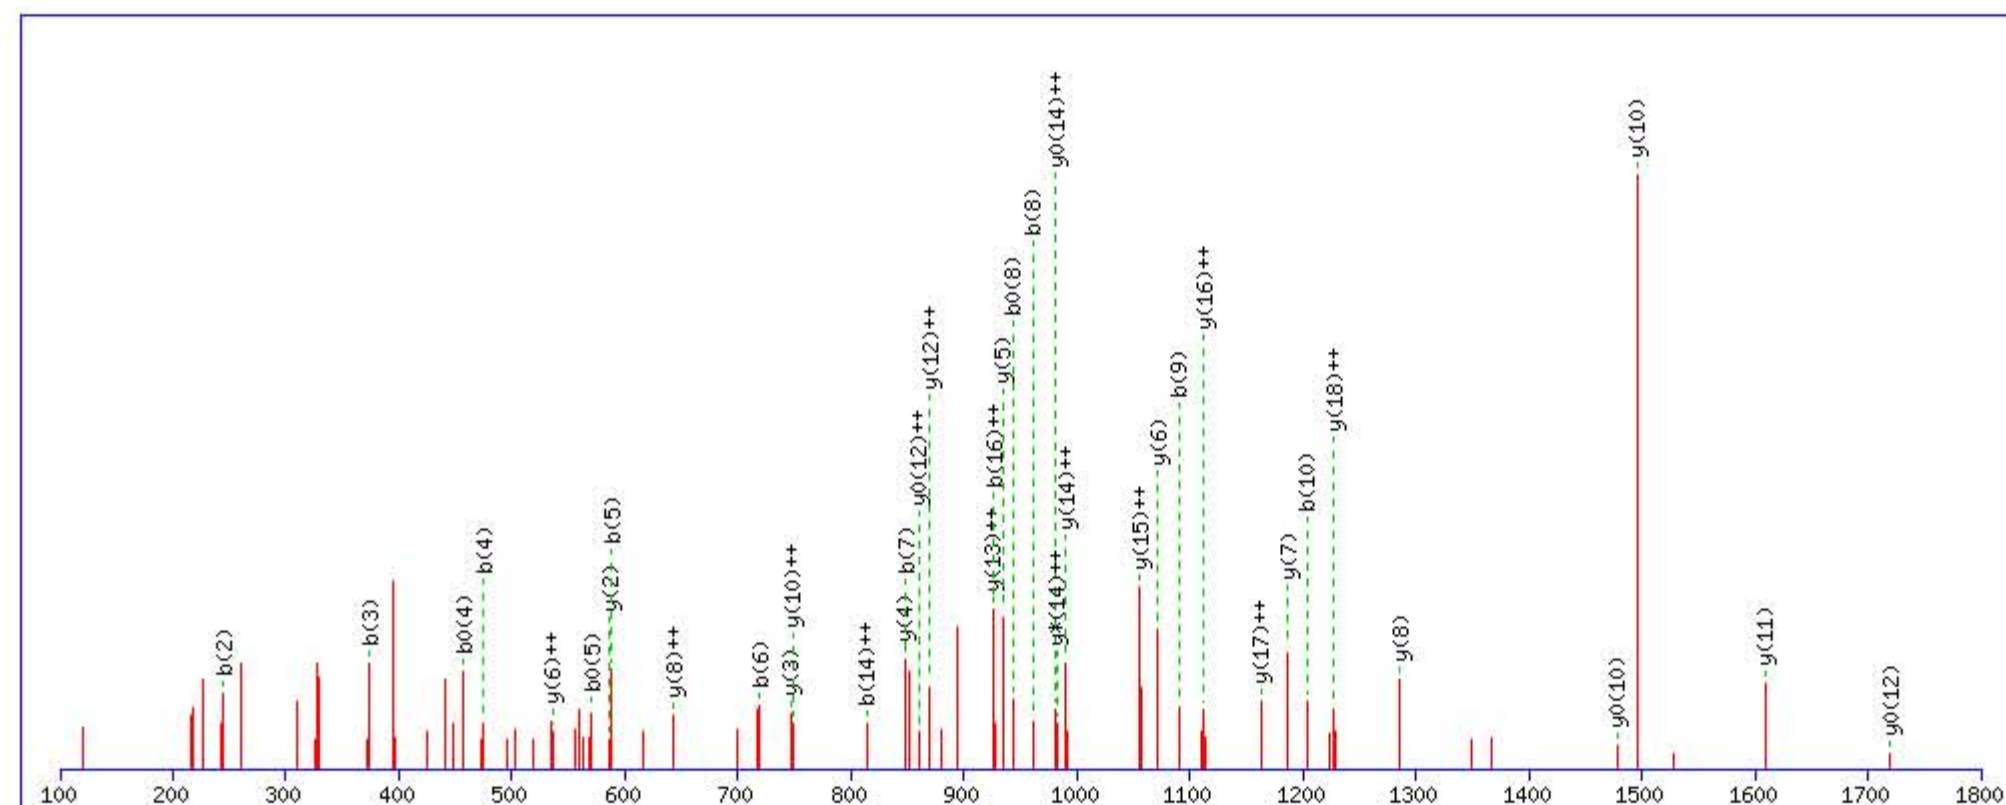

Monoisotopic mass of neutral peptide Mr(calc): 2697.321609

Fixed modifications: Carbamidomethyl (C) (apply to specified residues or termini only)

Variable modifications:

Q19 : Biotin:Thermo-21345 (Q)

Ions Score: 51 Expect: 0.00021

Matches : 38/182 fragment ions using 84 most intense peaks [\(help\)](#)

| #  | b                  | b <sup>++</sup>   | b <sup>*</sup> | b <sup>*++</sup> | b <sup>0</sup>    | b <sup>0++</sup> | Seq. | y                  | y <sup>++</sup>    | y <sup>*</sup> | y <sup>*++</sup>  | y <sup>0</sup>     | y <sup>0++</sup>  | #  |
|----|--------------------|-------------------|----------------|------------------|-------------------|------------------|------|--------------------|--------------------|----------------|-------------------|--------------------|-------------------|----|
| 1  | 148.075690         | 74.541483         |                |                  |                   |                  | F    |                    |                    |                |                   |                    |                   | 20 |
| 2  | <b>245.128454</b>  | 123.067865        |                |                  |                   |                  | P    | 2551.260482        | 1276.133879        | 2534.233933    | 1267.620604       | 2533.249917        | 1267.128596       | 19 |
| 3  | <b>374.171047</b>  | 187.589161        |                |                  | 356.160482        | 178.583879       | E    | 2454.207718        | <b>1227.607497</b> | 2437.181169    | 1219.094222       | 2436.197153        | 1218.602214       | 18 |
| 4  | <b>475.218726</b>  | 238.113001        |                |                  | <b>457.208161</b> | 229.107719       | T    | 2325.165125        | <b>1163.086200</b> | 2308.138576    | 1154.572926       | 2307.154560        | 1154.080918       | 17 |
| 5  | <b>588.302790</b>  | 294.655033        |                |                  | <b>570.292225</b> | 285.649751       | L    | 2224.117446        | <b>1112.562361</b> | 2207.090897    | 1104.049086       | 2206.106881        | 1103.557078       | 16 |
| 6  | <b>719.343275</b>  | 360.175276        |                |                  | 701.332710        | 351.169993       | M    | 2111.033382        | <b>1056.020329</b> | 2094.006833    | 1047.507054       | 2093.022817        | 1047.015046       | 15 |
| 7  | <b>848.385868</b>  | 424.696572        |                |                  | 830.375303        | 415.691290       | E    | 1979.992897        | <b>990.500087</b>  | 1962.966348    | <b>981.986812</b> | 1961.982332        | <b>981.494804</b> | 14 |
| 8  | <b>961.469932</b>  | 481.238604        |                |                  | <b>943.459367</b> | 472.233322       | I    | 1850.950304        | <b>925.978790</b>  | 1833.923755    | 917.465516        | 1832.939739        | 916.973508        | 13 |
| 9  | <b>1090.512525</b> | 545.759901        |                |                  | 1072.501960       | 536.754618       | E    | 1737.866240        | <b>869.436758</b>  | 1720.839691    | 860.923484        | <b>1719.855675</b> | <b>860.431476</b> | 12 |
| 10 | <b>1203.596589</b> | 602.301933        |                |                  | 1185.586024       | 593.296650       | I    | <b>1608.823647</b> | 804.915462         | 1591.797098    | 796.402187        | 1590.813082        | 795.910179        | 11 |
| 11 | 1300.649353        | 650.828315        |                |                  | 1282.638788       | 641.823032       | P    | <b>1495.739583</b> | <b>748.373430</b>  | 1478.713034    | 739.860155        | <b>1477.729018</b> | 739.368147        | 10 |
| 12 | 1413.733417        | 707.370346        |                |                  | 1395.722852       | 698.365064       | I    | 1398.686819        | 699.847048         | 1381.660270    | 691.333773        | 1380.676254        | 690.841765        | 9  |
| 13 | 1512.801831        | 756.904554        |                |                  | 1494.791266       | 747.899271       | V    | <b>1285.602755</b> | <b>643.305016</b>  | 1268.576206    | 634.791741        | 1267.592190        | 634.299733        | 8  |
| 14 | 1627.828774        | <b>814.418025</b> |                |                  | 1609.818209       | 805.412743       | D    | <b>1186.534341</b> | 593.770809         | 1169.507792    | 585.257534        | 1168.523776        | 584.765526        | 7  |
| 15 | 1764.887686        | 882.947481        |                |                  | 1746.877121       | 873.942199       | H    | <b>1071.507398</b> | <b>536.257337</b>  | 1054.480849    | 527.744063        | 1053.496833        | 527.252055        | 6  |
| 16 | 1851.919714        | <b>926.463495</b> |                |                  | 1833.909149       | 917.458213       | S    | <b>934.448486</b>  | 467.727881         | 917.421937     | 459.214607        | 916.437921         | 458.722599        | 5  |
| 17 | 1952.967393        | 976.987335        |                |                  | 1934.956828       | 967.982052       | T    | <b>847.416458</b>  | 424.211867         | 830.389909     | 415.698593        | 829.405893         | 415.206585        | 4  |
| 18 | 2112.998042        | 1057.002659       |                |                  | 2094.987477       | 1047.997376      | C    | <b>746.368779</b>  | 373.688028         | 729.342230     | 365.174753        |                    |                   | 3  |
| 19 | 2552.223368        | 1276.615322       | 2535.196819    | 1268.102047      | 2534.212803       | 1267.610039      | Q    | <b>586.338130</b>  | 293.672703         | 569.311581     | 285.159429        |                    |                   | 2  |
| 20 |                    |                   |                |                  |                   |                  | K    | 147.112804         | 74.060040          | 130.086255     | 65.546765         |                    |                   | 1  |

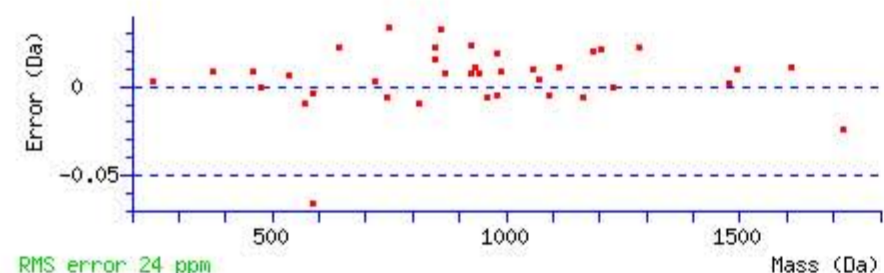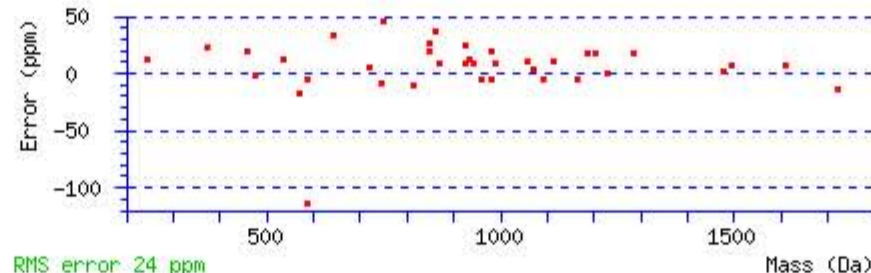

NCBI BLAST search of **FPETLMEIEIPIVDHSTCQK**

(Parameters: blastp, nr protein database, expect=20000, no filter, PAM30)

Other BLAST [web gateways](#)

All matches to this query

| Score | Mr(calc):   | Delta    | Sequence                             |
|-------|-------------|----------|--------------------------------------|
| 51.3  | 2697.321609 | 0.007383 | <a href="#">FPETLMEIEIPIVDHSTCQK</a> |

# MASCOT Search Results

## Peptide View

MS/MS Fragmentation of **APEPISTQSHSVLILFHSDNSGENR**

Found in **MASPI\_HUMAN**, Mannan-binding lectin serine protease 1 OS=Homo sapiens GN=MASPI PE=1 SV=3

Match to Query 54365: 3045.503456 from(762.383140,4+) rtinseconds(2289) index(47792)

Title: Locus:1.1.1.3509.16 File:"2013-07-02 CLN FXIII 180 min 3rd F 4.wiff"

Data file C:\Program Files (x86)\Matrix Science\Mascot Daemon\mgf9 FXIII 180 min 3rd\mascot\_daemon\_merge.mgf

Click mouse within plot area to zoom in by factor of two about that point

Or, Plot from 0 to 3000 Da Full range

Label all possible matches  Label matches used for scoring

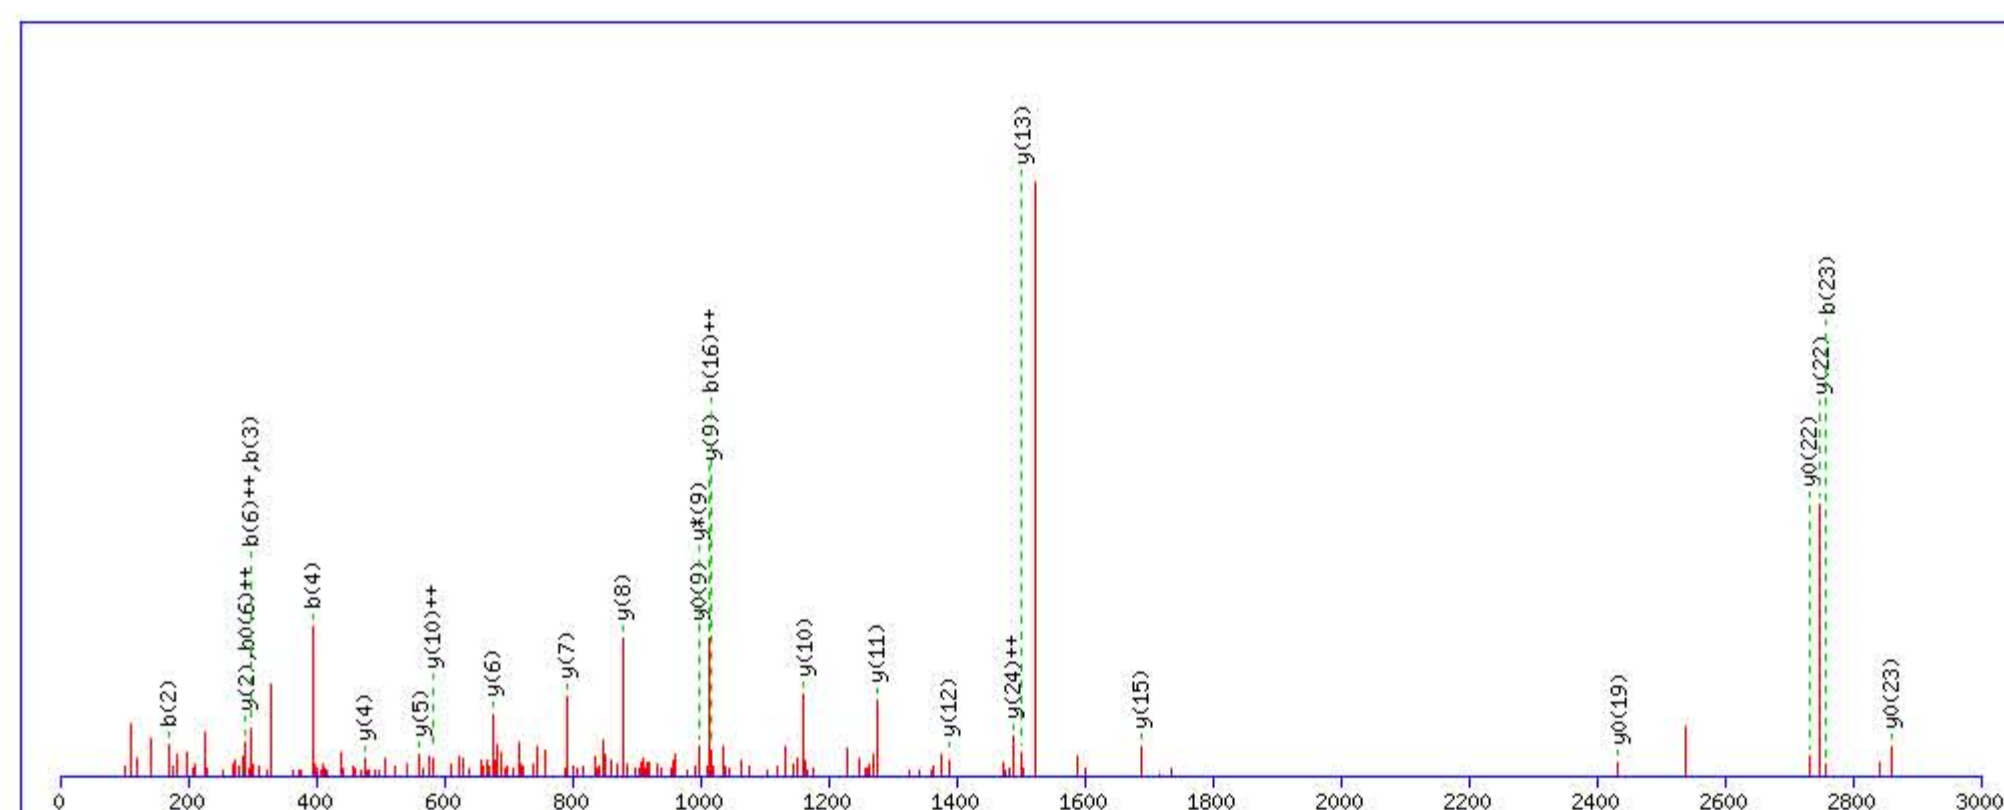

Monoisotopic mass of neutral peptide Mr(calc): 3045.497803

Fixed modifications: Carbamidomethyl (C) (apply to specified residues or termini only)

Variable modifications:

Q8 : Biotin:Thermo-21345 (Q)

Ions Score: 60 Expect: 2.9e-005

Matches : 27/266 fragment ions using 57 most intense peaks [\(help\)](#)

| #  | b                  | b <sup>++</sup>    | b <sup>+</sup> | b <sup>+++</sup> | b <sup>0</sup> | b <sup>0++</sup>  | Seq. | y                  | y <sup>++</sup>    | y <sup>+</sup>    | y <sup>+++</sup> | y <sup>0</sup>     | y <sup>0++</sup> | #  |
|----|--------------------|--------------------|----------------|------------------|----------------|-------------------|------|--------------------|--------------------|-------------------|------------------|--------------------|------------------|----|
| 1  | 72.044390          | 36.525833          |                |                  |                |                   | A    |                    |                    |                   |                  |                    |                  | 25 |
| 2  | <b>169.097154</b>  | 85.052215          |                |                  |                |                   | P    | 2975.467980        | <b>1488.237628</b> | 2958.441431       | 1479.724353      | 2957.457415        | 1479.232345      | 24 |
| 3  | <b>298.139747</b>  | 149.573512         |                |                  | 280.129182     | 140.568229        | E    | 2878.415216        | 1439.711246        | 2861.388667       | 1431.197971      | <b>2860.404651</b> | 1430.705963      | 23 |
| 4  | <b>395.192511</b>  | 198.099894         |                |                  | 377.181946     | 189.094611        | P    | <b>2749.372623</b> | 1375.189949        | 2732.346074       | 1366.676675      | <b>2731.362058</b> | 1366.184667      | 22 |
| 5  | 508.276575         | 254.641926         |                |                  | 490.266010     | 245.636643        | I    | 2652.319859        | 1326.663567        | 2635.293310       | 1318.150293      | 2634.309294        | 1317.658285      | 21 |
| 6  | 595.308603         | <b>298.157940</b>  |                |                  | 577.298038     | <b>289.152657</b> | S    | 2539.235795        | 1270.121535        | 2522.209246       | 1261.608261      | 2521.225230        | 1261.116253      | 20 |
| 7  | 696.356282         | 348.681779         |                |                  | 678.345717     | 339.676497        | T    | 2452.203767        | 1226.605521        | 2435.177218       | 1218.092247      | <b>2434.193202</b> | 1217.600239      | 19 |
| 8  | 1135.581608        | 568.294442         | 1118.555059    | 559.781168       | 1117.571043    | 559.289160        | Q    | 2351.156088        | 1176.081682        | 2334.129539       | 1167.568407      | 2333.145523        | 1167.076399      | 18 |
| 9  | 1222.613636        | 611.810456         | 1205.587087    | 603.297182       | 1204.603071    | 602.805174        | S    | 1911.930762        | 956.469019         | 1894.904213       | 947.955745       | 1893.920197        | 947.463737       | 17 |
| 10 | 1359.672548        | 680.339912         | 1342.645999    | 671.826638       | 1341.661983    | 671.334630        | H    | 1824.898734        | 912.953005         | 1807.872185       | 904.439731       | 1806.888169        | 903.947723       | 16 |
| 11 | 1446.704576        | 723.855926         | 1429.678027    | 715.342652       | 1428.694011    | 714.850644        | S    | <b>1687.839822</b> | 844.423549         | 1670.813273       | 835.910275       | 1669.829257        | 835.418267       | 15 |
| 12 | 1545.772990        | 773.390133         | 1528.746441    | 764.876859       | 1527.762425    | 764.384851        | V    | 1600.807794        | 800.907535         | 1583.781245       | 792.394261       | 1582.797229        | 791.902253       | 14 |
| 13 | 1658.857054        | 829.932165         | 1641.830505    | 821.418891       | 1640.846489    | 820.926883        | L    | <b>1501.739380</b> | 751.373328         | 1484.712831       | 742.860054       | 1483.728815        | 742.368045       | 13 |
| 14 | 1771.941118        | 886.474197         | 1754.914569    | 877.960923       | 1753.930553    | 877.468915        | I    | <b>1388.655316</b> | 694.831296         | 1371.628767       | 686.318022       | 1370.644751        | 685.826014       | 12 |
| 15 | 1885.025182        | 943.016229         | 1867.998633    | 934.502955       | 1867.014617    | 934.010947        | L    | <b>1275.571252</b> | 638.289264         | 1258.544703       | 629.775990       | 1257.560687        | 629.283982       | 11 |
| 16 | 2032.093596        | <b>1016.550436</b> | 2015.067047    | 1008.037162      | 2014.083031    | 1007.545154       | F    | <b>1162.487188</b> | <b>581.747232</b>  | 1145.460639       | 573.233958       | 1144.476623        | 572.741950       | 10 |
| 17 | 2169.152508        | 1085.079892        | 2152.125959    | 1076.566617      | 2151.141943    | 1076.074610       | H    | <b>1015.418774</b> | 508.213025         | <b>998.392225</b> | 499.699751       | <b>997.408209</b>  | 499.207743       | 9  |
| 18 | 2256.184536        | 1128.595906        | 2239.157987    | 1120.082631      | 2238.173971    | 1119.590624       | S    | <b>878.359862</b>  | 439.683569         | 861.333313        | 431.170295       | 860.349297         | 430.678287       | 8  |
| 19 | 2371.211479        | 1186.109377        | 2354.184930    | 1177.596103      | 2353.200914    | 1177.104095       | D    | <b>791.327834</b>  | 396.167555         | 774.301285        | 387.654280       | 773.317269         | 387.162272       | 7  |
| 20 | 2485.254406        | 1243.130841        | 2468.227857    | 1234.617566      | 2467.243841    | 1234.125558       | N    | <b>676.300891</b>  | 338.654084         | 659.274342        | 330.140809       | 658.290326         | 329.648801       | 6  |
| 21 | 2572.286434        | 1286.646855        | 2555.259885    | 1278.133580      | 2554.275869    | 1277.641572       | S    | <b>562.257964</b>  | 281.632620         | 545.231415        | 273.119346       | 544.247399         | 272.627338       | 5  |
| 22 | 2629.307898        | 1315.157587        | 2612.281349    | 1306.644312      | 2611.297333    | 1306.152304       | G    | <b>475.225936</b>  | 238.116606         | 458.199387        | 229.603331       | 457.215371         | 229.111323       | 4  |
| 23 | <b>2758.350491</b> | 1379.678884        | 2741.323942    | 1371.165609      | 2740.339926    | 1370.673601       | E    | 418.204472         | 209.605874         | 401.177923        | 201.092600       | 400.193907         | 200.600592       | 3  |
| 24 | 2872.393418        | 1436.700347        | 2855.366869    | 1428.187072      | 2854.382853    | 1427.695064       | N    | <b>289.161879</b>  | 145.084577         | 272.135330        | 136.571303       |                    |                  | 2  |
| 25 |                    |                    |                |                  |                |                   | R    | 175.118952         | 88.063114          | 158.092403        | 79.549839        |                    |                  | 1  |

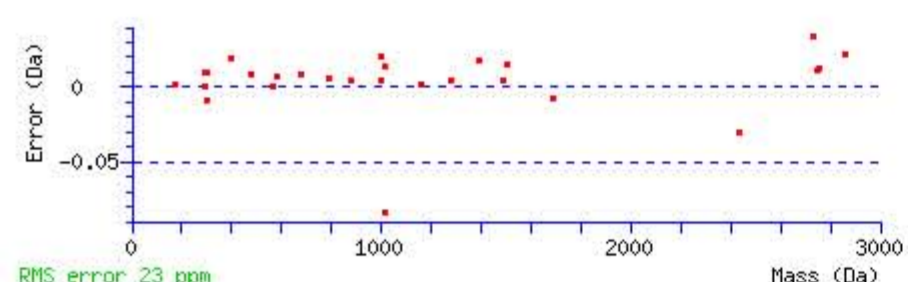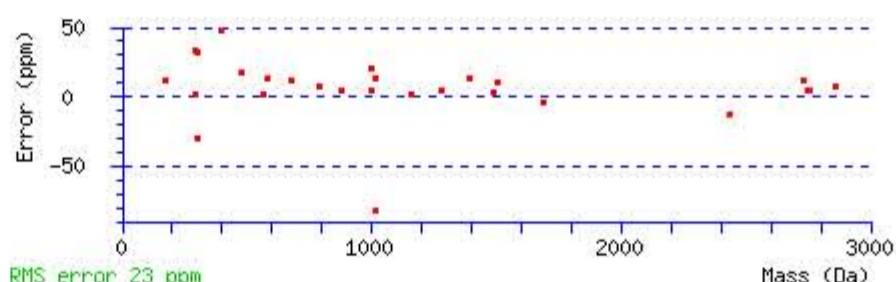

NCBI BLAST search of [APEPISTQSHSVLILFHSDNSGENR](#)

(Parameters: blastp, nr protein database, expect=20000, no filter, PAM30)

Other BLAST [web gateways](#)

All matches to this query

| Score | Mr(calc):   | Delta    | Sequence                                  |
|-------|-------------|----------|-------------------------------------------|
| 59.9  | 3045.497803 | 0.005653 | <a href="#">APEPISTQSHSVLILFHSDNSGENR</a> |

# MASCOT Search Results

## Peptide View

MS/MS Fragmentation of **VLSIAQAHSPAFSCEQVR**

Found in **CD14\_HUMAN**, Monocyte differentiation antigen CD14 OS=Homo sapiens GN=CD14 PE=1 SV=2

Match to Query 45272: 2310.156132 from(771.059320,3+) rtinseconds(2001) index(31897)

Title: Locus:1.1.1.3360.19 File:"2013-07-02 CLN FXIII 180 min 3rd F 3.wiff"

Data file C:\Program Files (x86)\Matrix Science\Mascot Daemon\mgf9 FXIII 180 min 3rd\mascot\_daemon\_merge.mgf

Click mouse within plot area to zoom in by factor of two about that point

Or, Plot from  to  Da

Label all possible matches  Label matches used for scoring

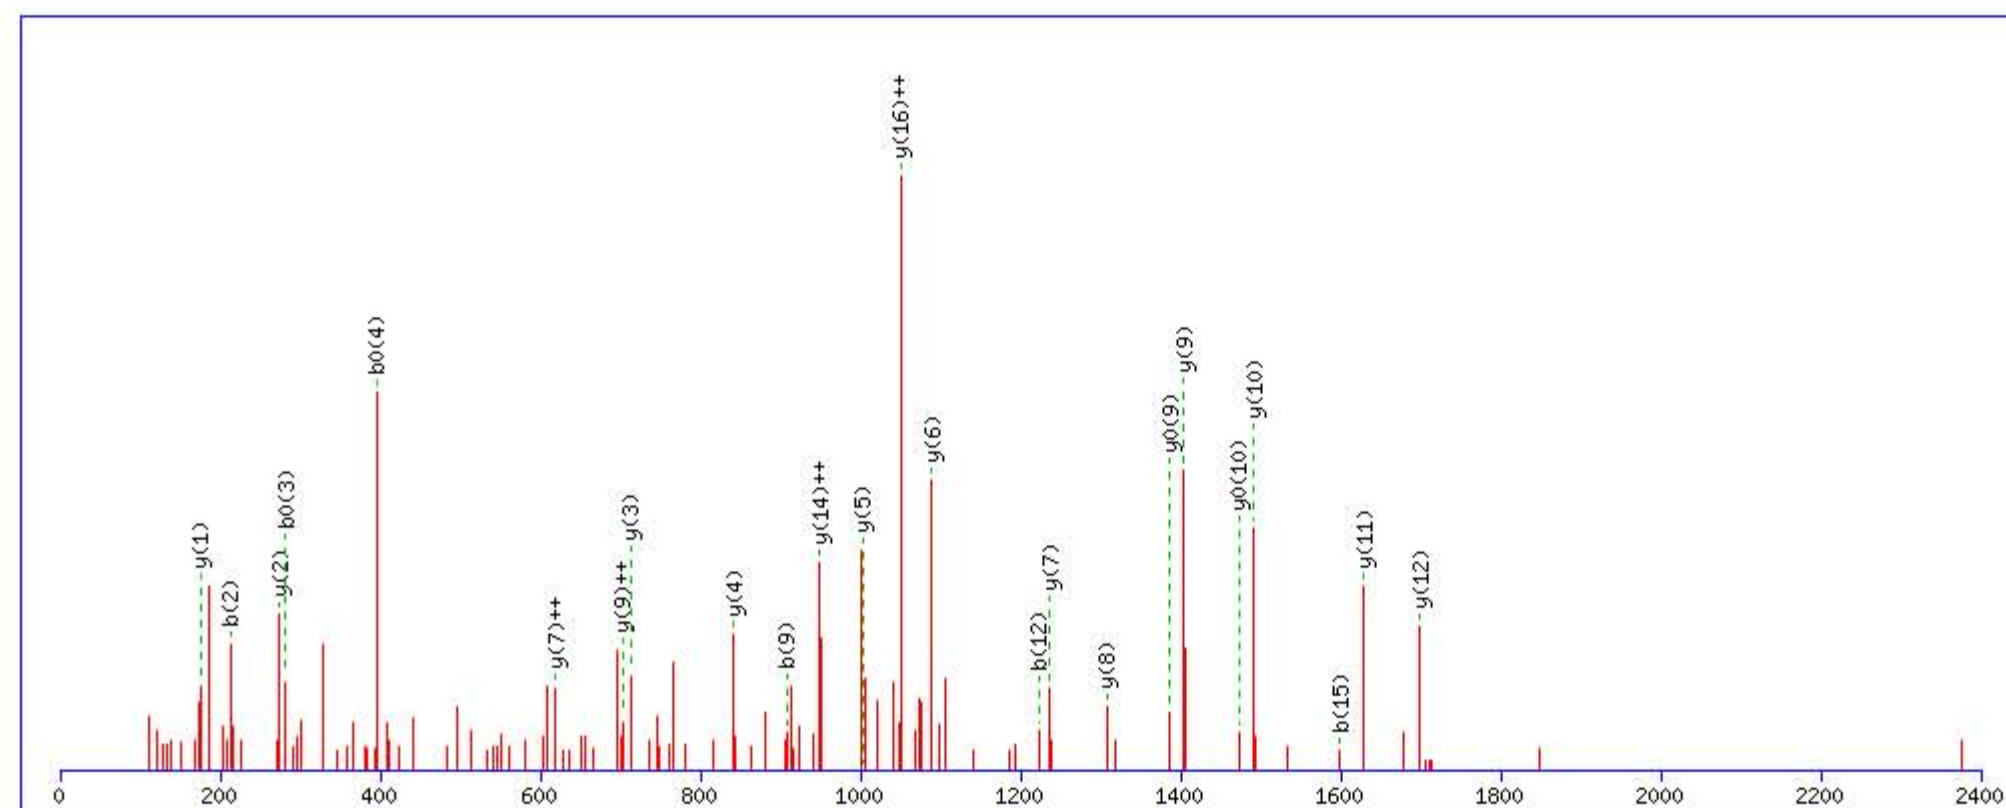

Monoisotopic mass of neutral peptide Mr(calc): 2310.161285

Fixed modifications: Carbamidomethyl (C) (apply to specified residues or termini only)

Variable modifications:

Q16 : Biotin:Thermo-21345 (Q)

Ions Score: 64 Expect: 1.1e-005

Matches : 24/184 fragment ions using 50 most intense peaks [\(help\)](#)

| #  | b                  | b <sup>++</sup> | b <sup>*</sup> | b <sup>*++</sup> | b <sup>0</sup>    | b <sup>0++</sup> | Seq. | y                  | y <sup>++</sup>    | y <sup>*</sup> | y <sup>*++</sup> | y <sup>0</sup>     | y <sup>0++</sup> | #  |
|----|--------------------|-----------------|----------------|------------------|-------------------|------------------|------|--------------------|--------------------|----------------|------------------|--------------------|------------------|----|
| 1  | 100.075690         | 50.541483       |                |                  |                   |                  | V    |                    |                    |                |                  |                    |                  | 18 |
| 2  | <b>213.159754</b>  | 107.083515      |                |                  |                   |                  | L    | 2212.100156        | 1106.553716        | 2195.073607    | 1098.040441      | 2194.089591        | 1097.548433      | 17 |
| 3  | 300.191782         | 150.599529      |                |                  | <b>282.181217</b> | 141.594247       | S    | 2099.016092        | <b>1050.011684</b> | 2081.989543    | 1041.498409      | 2081.005527        | 1041.006401      | 16 |
| 4  | 413.275846         | 207.141561      |                |                  | <b>395.265281</b> | 198.136279       | I    | 2011.984064        | 1006.495670        | 1994.957515    | 997.982396       | 1993.973499        | 997.490388       | 15 |
| 5  | 484.312960         | 242.660118      |                |                  | 466.302395        | 233.654836       | A    | 1898.900000        | <b>949.953638</b>  | 1881.873451    | 941.440364       | 1880.889435        | 940.948356       | 14 |
| 6  | 612.371538         | 306.689407      | 595.344989     | 298.176133       | 594.360973        | 297.684125       | Q    | 1827.862886        | 914.435081         | 1810.836337    | 905.921807       | 1809.852321        | 905.429799       | 13 |
| 7  | 683.408652         | 342.207964      | 666.382103     | 333.694690       | 665.398087        | 333.202682       | A    | <b>1699.804308</b> | 850.405792         | 1682.777759    | 841.892518       | 1681.793743        | 841.400510       | 12 |
| 8  | 820.467564         | 410.737420      | 803.441015     | 402.224146       | 802.456999        | 401.732138       | H    | <b>1628.767194</b> | 814.887235         | 1611.740645    | 806.373961       | 1610.756629        | 805.881953       | 11 |
| 9  | <b>907.499592</b>  | 454.253434      | 890.473043     | 445.740160       | 889.489027        | 445.248152       | S    | <b>1491.708282</b> | 746.357779         | 1474.681733    | 737.844505       | <b>1473.697717</b> | 737.352497       | 10 |
| 10 | 1004.552356        | 502.779816      | 987.525807     | 494.266542       | 986.541791        | 493.774534       | P    | <b>1404.676254</b> | <b>702.841765</b>  | 1387.649705    | 694.328491       | <b>1386.665689</b> | 693.836483       | 9  |
| 11 | 1075.589470        | 538.298373      | 1058.562921    | 529.785099       | 1057.578905       | 529.293091       | A    | <b>1307.623490</b> | 654.315383         | 1290.596941    | 645.802109       | 1289.612925        | 645.310101       | 8  |
| 12 | <b>1222.657884</b> | 611.832580      | 1205.631335    | 603.319306       | 1204.647319       | 602.827298       | F    | <b>1236.586376</b> | <b>618.796826</b>  | 1219.559827    | 610.283552       | 1218.575811        | 609.791544       | 7  |
| 13 | 1309.689912        | 655.348594      | 1292.663363    | 646.835320       | 1291.679347       | 646.343312       | S    | <b>1089.517962</b> | 545.262619         | 1072.491413    | 536.749345       | 1071.507397        | 536.257337       | 6  |
| 14 | 1469.720561        | 735.363919      | 1452.694012    | 726.850644       | 1451.709996       | 726.358636       | C    | <b>1002.485934</b> | 501.746605         | 985.459385     | 493.233331       | 984.475369         | 492.741323       | 5  |
| 15 | <b>1598.763154</b> | 799.885215      | 1581.736605    | 791.371941       | 1580.752589       | 790.879933       | E    | <b>842.455285</b>  | 421.731281         | 825.428736     | 413.218006       | 824.444720         | 412.725998       | 4  |
| 16 | 2037.988480        | 1019.497878     | 2020.961931    | 1010.984604      | 2019.977915       | 1010.492596      | Q    | <b>713.412692</b>  | 357.209984         | 696.386143     | 348.696710       |                    |                  | 3  |
| 17 | 2137.056894        | 1069.032085     | 2120.030345    | 1060.518811      | 2119.046329       | 1060.026803      | V    | <b>274.187366</b>  | 137.597321         | 257.160817     | 129.084046       |                    |                  | 2  |
| 18 |                    |                 |                |                  |                   |                  | R    | <b>175.118952</b>  | 88.063114          | 158.092403     | 79.549839        |                    |                  | 1  |

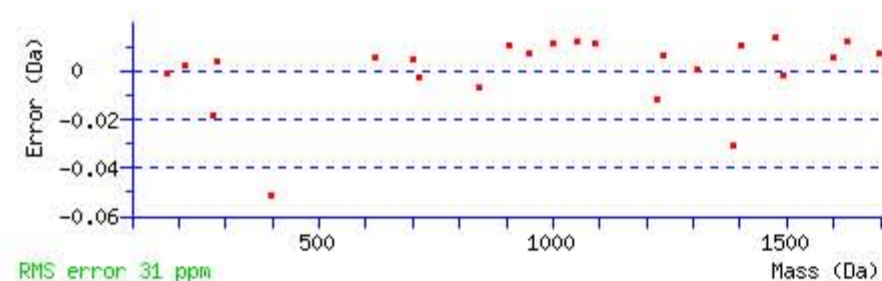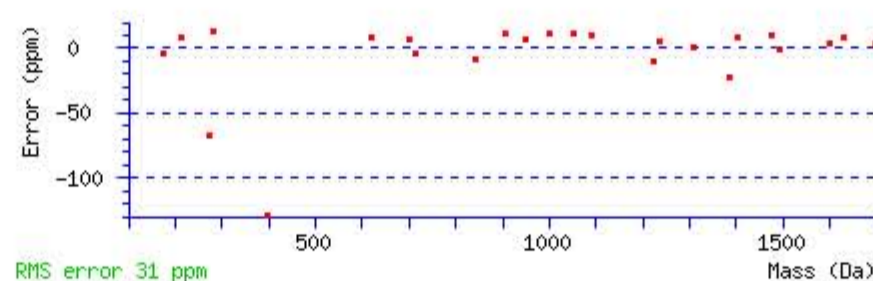

NCBI BLAST search of [VLSIAQAHSPAFSCEQVR](#)

(Parameters: blastp, nr protein database, expect=20000, no filter, PAM30)

Other BLAST [web gateways](#)

All matches to this query

| Score | Mr(calc):   | Delta     | Sequence                           |
|-------|-------------|-----------|------------------------------------|
| 64.1  | 2310.161285 | -0.005153 | <a href="#">VLSIAQAHSPAFSCEQVR</a> |

# Mascot Search Results

## Peptide View

MS/MS Fragmentation of **GSQTQSHPD LGTEGCWDQLSAPR**

Found in **PGRP2\_HUMAN**, N-acetylmuramoyl-L-alanine amidase OS=Homo sapiens GN=PGLYRP2 PE=1 SV=1

Match to Query 52010: 2837.298702 from(946.773510,3+) rtinseconds(2073) index(60976)

Title: Locus:1.1.1.1633.10 File:"2013-07-02 CLN FXIII 180 min 3rd FT.wiff"

Data file C:\Program Files (x86)\Matrix Science\Mascot Daemon\mgf9 FXIII 180 min 3rd\mascot\_daemon\_merge.mgf

Click mouse within plot area to zoom in by factor of two about that point

Or, Plot from 0 to 2600 Da Full range

Label all possible matches  Label matches used for scoring

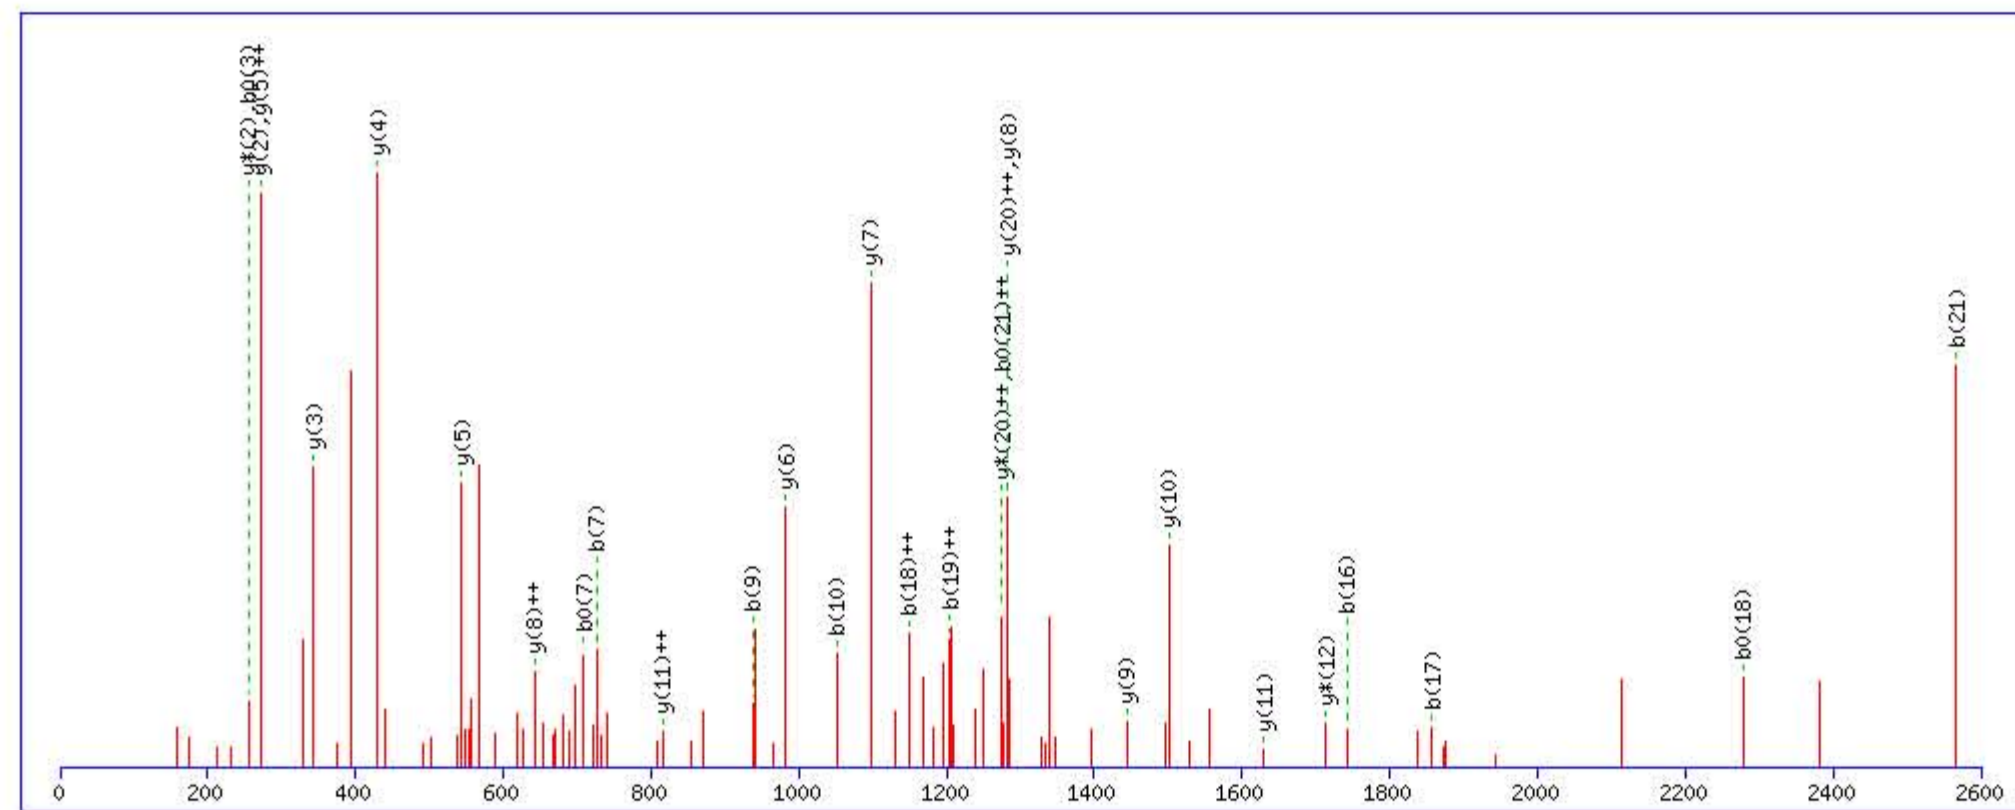

Monoisotopic mass of neutral peptide Mr(calc): 2837.286133

Fixed modifications: Carbamidomethyl (C) (apply to specified residues or termini only)

Variable modifications:

Q18 : Biotin:Thermo-21345 (Q)

Ions Score: 57 Expect: 2.4e-005

Matches : 29/252 fragment ions using 39 most intense peaks [\(help\)](#)

| #  | b                  | b <sup>++</sup>    | b <sup>+</sup> | b <sup>+++</sup> | b <sup>0</sup>     | b <sup>0++</sup> | Seq. | y                  | y <sup>++</sup>    | y <sup>+</sup>     | y <sup>+++</sup>   | y <sup>0</sup> | y <sup>0++</sup> | #  |
|----|--------------------|--------------------|----------------|------------------|--------------------|------------------|------|--------------------|--------------------|--------------------|--------------------|----------------|------------------|----|
| 1  | 58.028740          | 29.518008          |                |                  |                    |                  | G    |                    |                    |                    |                    |                |                  | 23 |
| 2  | 145.060768         | 73.034022          |                |                  | 127.050203         | 64.028740        | S    | 2781.271927        | 1391.139601        | 2764.245378        | 1382.626327        | 2763.261362    | 1382.134319      | 22 |
| 3  | 273.119346         | 137.063311         | 256.092797     | 128.550037       | <b>255.108781</b>  | 128.058029       | Q    | 2694.239899        | 1347.623587        | 2677.213350        | 1339.110313        | 2676.229334    | 1338.618305      | 21 |
| 4  | 374.167025         | 187.587151         | 357.140476     | 179.073876       | 356.156460         | 178.581868       | T    | 2566.181321        | <b>1283.594298</b> | 2549.154772        | <b>1275.081024</b> | 2548.170756    | 1274.589016      | 20 |
| 5  | 502.225603         | 251.616440         | 485.199054     | 243.103165       | 484.215038         | 242.611157       | Q    | 2465.133642        | 1233.070459        | 2448.107093        | 1224.557184        | 2447.123077    | 1224.065176      | 19 |
| 6  | 589.257631         | 295.132454         | 572.231082     | 286.619179       | 571.247066         | 286.127171       | S    | 2337.075064        | 1169.041170        | 2320.048515        | 1160.527895        | 2319.064499    | 1160.035887      | 18 |
| 7  | <b>726.316543</b>  | 363.661910         | 709.289994     | 355.148635       | <b>708.305978</b>  | 354.656627       | H    | 2250.043036        | 1125.525156        | 2233.016487        | 1117.011881        | 2232.032471    | 1116.519873      | 17 |
| 8  | 823.369307         | 412.188292         | 806.342758     | 403.675017       | 805.358742         | 403.183009       | P    | 2112.984124        | 1056.995700        | 2095.957575        | 1048.482425        | 2094.973559    | 1047.990417      | 16 |
| 9  | <b>938.396250</b>  | 469.701763         | 921.369701     | 461.188489       | 920.385685         | 460.696481       | D    | 2015.931360        | 1008.469318        | 1998.904811        | 999.956044         | 1997.920795    | 999.464036       | 15 |
| 10 | <b>1051.480314</b> | 526.243795         | 1034.453765    | 517.730521       | 1033.469749        | 517.238512       | L    | 1900.904417        | 950.955847         | 1883.877868        | 942.442572         | 1882.893852    | 941.950564       | 14 |
| 11 | 1108.501778        | 554.754527         | 1091.475229    | 546.241252       | 1090.491213        | 545.749244       | G    | 1787.820353        | 894.413815         | 1770.793804        | 885.900540         | 1769.809788    | 885.408532       | 13 |
| 12 | 1209.549457        | 605.278366         | 1192.522908    | 596.765092       | 1191.538892        | 596.273084       | T    | 1730.798889        | 865.903083         | <b>1713.772340</b> | 857.389808         | 1712.788324    | 856.897800       | 12 |
| 13 | 1338.592050        | 669.799663         | 1321.565501    | 661.286389       | 1320.581485        | 660.794380       | E    | <b>1629.751210</b> | <b>815.379243</b>  | 1612.724661        | 806.865969         | 1611.740645    | 806.373961       | 11 |
| 14 | 1395.613514        | 698.310395         | 1378.586965    | 689.797121       | 1377.602949        | 689.305112       | G    | <b>1500.708617</b> | 750.857947         | 1483.682068        | 742.344672         | 1482.698052    | 741.852664       | 10 |
| 15 | 1555.644163        | 778.325719         | 1538.617614    | 769.812445       | 1537.633598        | 769.320437       | C    | <b>1443.687153</b> | 722.347215         | 1426.660604        | 713.833940         | 1425.676588    | 713.341932       | 9  |
| 16 | <b>1741.723476</b> | 871.365376         | 1724.696927    | 862.852102       | 1723.712911        | 862.360093       | W    | <b>1283.656504</b> | <b>642.331890</b>  | 1266.629955        | 633.818616         | 1265.645939    | 633.326608       | 8  |
| 17 | <b>1856.750419</b> | 928.878848         | 1839.723870    | 920.365573       | 1838.739854        | 919.873565       | D    | <b>1097.577191</b> | 549.292234         | 1080.550642        | 540.778959         | 1079.566626    | 540.286951       | 7  |
| 18 | 2295.975745        | <b>1148.491510</b> | 2278.949196    | 1139.978236      | <b>2277.965180</b> | 1139.486228      | Q    | <b>982.550248</b>  | 491.778762         | 965.523699         | 483.265488         | 964.539683     | 482.773480       | 6  |
| 19 | 2409.059809        | <b>1205.033542</b> | 2392.033260    | 1196.520268      | 2391.049244        | 1196.028260      | L    | <b>543.324922</b>  | <b>272.166099</b>  | 526.298373         | 263.652825         | 525.314357     | 263.160817       | 5  |
| 20 | 2496.091837        | 1248.549556        | 2479.065288    | 1240.036282      | 2478.081272        | 1239.544274      | S    | <b>430.240858</b>  | 215.624067         | 413.214309         | 207.110793         | 412.230293     | 206.618785       | 4  |
| 21 | <b>2567.128951</b> | 1284.068114        | 2550.102402    | 1275.554839      | 2549.118386        | 1275.062831      | A    | <b>343.208830</b>  | 172.108053         | 326.182281         | 163.594779         |                |                  | 3  |
| 22 | 2664.181715        | 1332.594496        | 2647.155166    | 1324.081221      | 2646.171150        | 1323.589213      | P    | <b>272.171716</b>  | 136.589496         | <b>255.145167</b>  | 128.076221         |                |                  | 2  |
| 23 |                    |                    |                |                  |                    |                  | R    | 175.118952         | 88.063114          | 158.092403         | 79.549839          |                |                  | 1  |

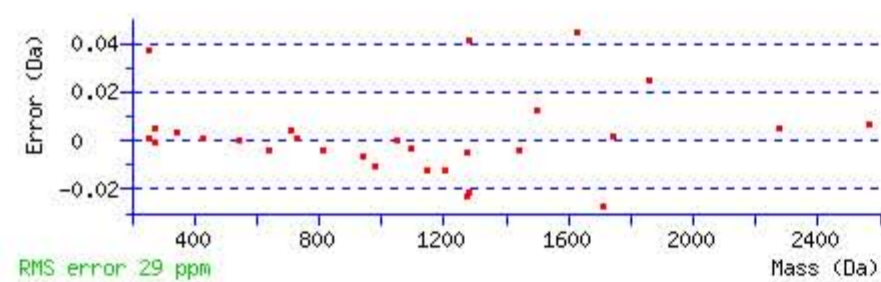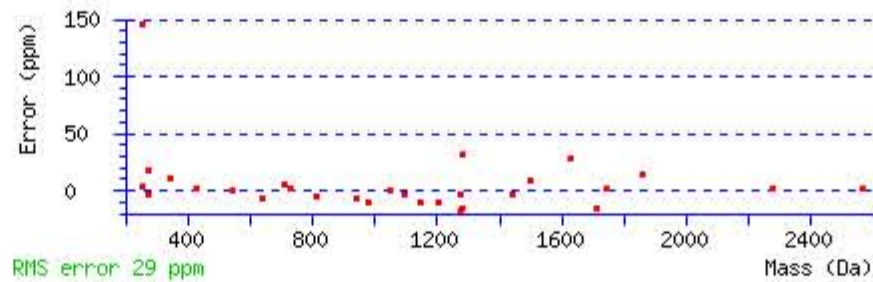

NCBI BLAST search of [GSQTQSHPD LGTEGCWDQLSAPR](#)

(Parameters: blastp, nr protein database, expect=20000, no filter, PAM30)

Other BLAST [web gateways](#)

All matches to this query

| Score | Mr(calc):   | Delta    | Sequence                                 |
|-------|-------------|----------|------------------------------------------|
| 56.8  | 2837.286133 | 0.012569 | <a href="#">GSQTQSHPD LGTEGCWDQLSAPR</a> |
| 1.8   | 2837.286133 | 0.012569 | <a href="#">GSQTQSHPD LGTEGCWDQLSAPR</a> |
| 1.6   | 2837.286133 | 0.012569 | <a href="#">GSQTQSHPD LGTEGCWDQLSAPR</a> |

# MASCOT Search Results

## Peptide View

MS/MS Fragmentation of **RPYQEGTPCSQCPSGYHCK**  
 Found in **PII6\_HUMAN**, Peptidase inhibitor 16 OS=Homo sapiens GN=PII6 PE=1 SV=1

Match to Query 49714: 2622.116616 from(656.536430,4+) rtinseconds(1363) index(28048)  
 Title: Locus:1.1.1.3137.16 File:"2013-07-02 CLN FXIII 180 min 3rd F 3.wiff"  
 Data file C:\Program Files (x86)\Matrix Science\Mascot Daemon\mgf9 FXIII 180 min 3rd\mascot\_daemon\_merge.mgf

Click mouse within plot area to zoom in by factor of two about that point

Or, Plot from  to  Da

Label all possible matches  Label matches used for scoring

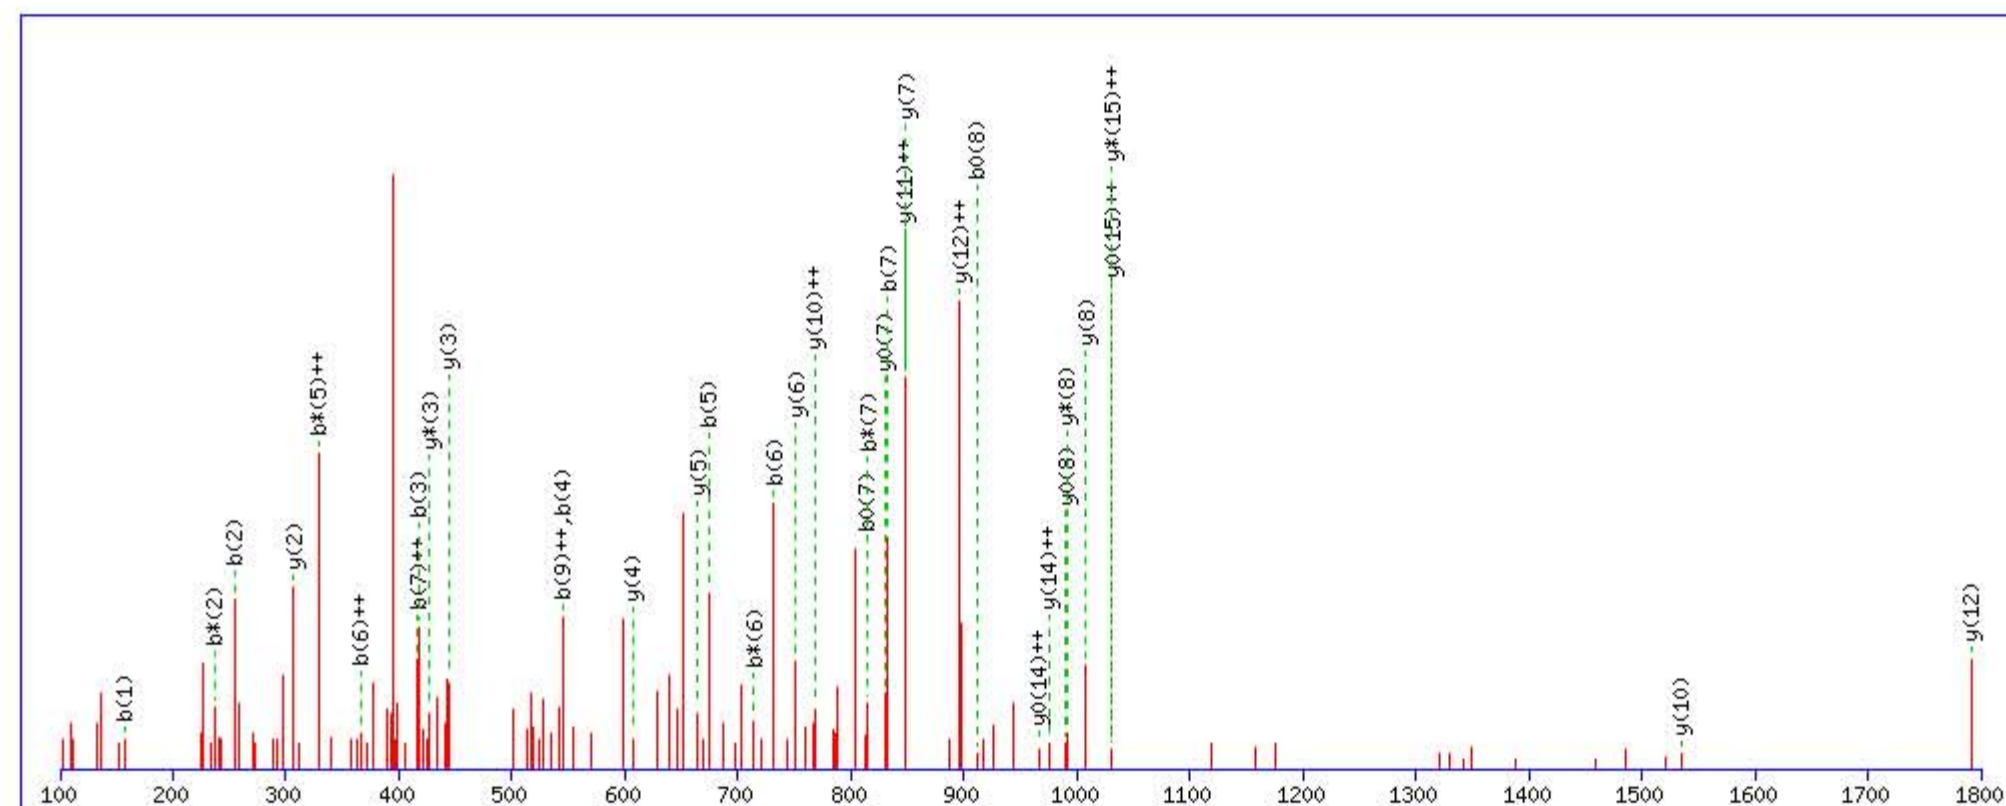

Monoisotopic mass of neutral peptide  $M_r(\text{calc})$ : 2622.123611  
 Fixed modifications: Carbamidomethyl (C) (apply to specified residues or termini only)  
 Variable modifications:  
 Q11 : Biotin:Thermo-21345 (Q)  
 Ions Score: 31 Expect: 0.0023  
 Matches : 36/198 fragment ions using 94 most intense peaks ([help](#))

| #  | b                 | b <sup>++</sup>   | b <sup>+</sup>    | b <sup>+++</sup>  | b <sup>0</sup>    | b <sup>0++</sup> | Seq. | y                  | y <sup>++</sup>   | y <sup>+</sup>    | y <sup>+++</sup>   | y <sup>0</sup>    | y <sup>0++</sup>   | #  |
|----|-------------------|-------------------|-------------------|-------------------|-------------------|------------------|------|--------------------|-------------------|-------------------|--------------------|-------------------|--------------------|----|
| 1  | <b>157.108387</b> | 79.057831         | 140.081838        | 70.544557         |                   |                  | R    |                    |                   |                   |                    |                   |                    | 19 |
| 2  | <b>254.161151</b> | 127.584213        | <b>237.134602</b> | 119.070939        |                   |                  | P    | 2467.029773        | 1234.018524       | 2450.003224       | 1225.505250        | 2449.019208       | 1225.013242        | 18 |
| 3  | <b>417.224480</b> | 209.115878        | 400.197931        | 200.602604        |                   |                  | Y    | 2369.977009        | 1185.492142       | 2352.950460       | 1176.978868        | 2351.966444       | 1176.486860        | 17 |
| 4  | <b>545.283058</b> | 273.145167        | 528.256509        | 264.631893        |                   |                  | Q    | 2206.913680        | 1103.960478       | 2189.887131       | 1095.447203        | 2188.903115       | 1094.955195        | 16 |
| 5  | <b>674.325651</b> | 337.666464        | 657.299102        | <b>329.153189</b> | 656.315086        | 328.661181       | E    | 2078.855102        | 1039.931189       | 2061.828553       | <b>1031.417914</b> | 2060.844537       | <b>1030.925906</b> | 15 |
| 6  | <b>731.347115</b> | <b>366.177196</b> | <b>714.320566</b> | 357.663921        | 713.336550        | 357.171913       | G    | 1949.812509        | <b>975.409892</b> | 1932.785960       | 966.896618         | 1931.801944       | <b>966.404610</b>  | 14 |
| 7  | <b>832.394794</b> | <b>416.701035</b> | <b>815.368245</b> | 408.187761        | <b>814.384229</b> | 407.695753       | T    | 1892.791045        | 946.899160        | 1875.764496       | 938.385886         | 1874.780480       | 937.893878         | 13 |
| 8  | 929.447558        | 465.227417        | 912.421009        | 456.714143        | <b>911.436993</b> | 456.222135       | P    | <b>1791.743366</b> | <b>896.375321</b> | 1774.716817       | 887.862047         | 1773.732801       | 887.370038         | 12 |
| 9  | 1089.478207       | <b>545.242742</b> | 1072.451658       | 536.729467        | 1071.467642       | 536.237459       | C    | 1694.690602        | <b>847.848939</b> | 1677.664053       | 839.335665         | 1676.680037       | 838.843656         | 11 |
| 10 | 1176.510235       | 588.758756        | 1159.483686       | 580.245481        | 1158.499670       | 579.753473       | S    | <b>1534.659953</b> | <b>767.833614</b> | 1517.633404       | 759.320340         | 1516.649388       | 758.828332         | 10 |
| 11 | 1615.735561       | 808.371419        | 1598.709012       | 799.858144        | 1597.724996       | 799.366136       | Q    | 1447.627925        | 724.317600        | 1430.601376       | 715.804326         | 1429.617360       | 715.312318         | 9  |
| 12 | 1775.766210       | 888.386743        | 1758.739661       | 879.873469        | 1757.755645       | 879.381461       | C    | <b>1008.402599</b> | 504.704937        | <b>991.376050</b> | 496.191663         | <b>990.392034</b> | 495.699655         | 8  |
| 13 | 1872.818974       | 936.913125        | 1855.792425       | 928.399851        | 1854.808409       | 927.907843       | P    | <b>848.371950</b>  | 424.689613        | 831.345401        | 416.176338         | <b>830.361385</b> | 415.684330         | 7  |
| 14 | 1959.851002       | 980.429139        | 1942.824453       | 971.915865        | 1941.840437       | 971.423857       | S    | <b>751.319186</b>  | 376.163231        | 734.292637        | 367.649956         | 733.308621        | 367.157948         | 6  |
| 15 | 2016.872466       | 1008.939871       | 1999.845917       | 1000.426597       | 1998.861901       | 999.934589       | G    | <b>664.287158</b>  | 332.647217        | 647.260609        | 324.133942         |                   |                    | 5  |
| 16 | 2179.935795       | 1090.471535       | 2162.909246       | 1081.958261       | 2161.925230       | 1081.466253      | Y    | <b>607.265694</b>  | 304.136485        | 590.239145        | 295.623210         |                   |                    | 4  |
| 17 | 2316.994707       | 1159.000991       | 2299.968158       | 1150.487717       | 2298.984142       | 1149.995709      | H    | <b>444.202365</b>  | 222.604820        | <b>427.175816</b> | 214.091546         |                   |                    | 3  |
| 18 | 2477.025356       | 1239.016316       | 2459.998807       | 1230.503041       | 2459.014791       | 1230.011033      | C    | <b>307.143453</b>  | 154.075364        | 290.116904        | 145.562090         |                   |                    | 2  |
| 19 |                   |                   |                   |                   |                   |                  | K    | 147.112804         | 74.060040         | 130.086255        | 65.546765          |                   |                    | 1  |

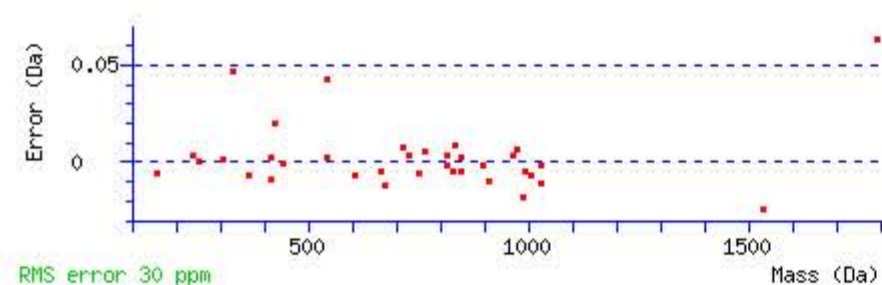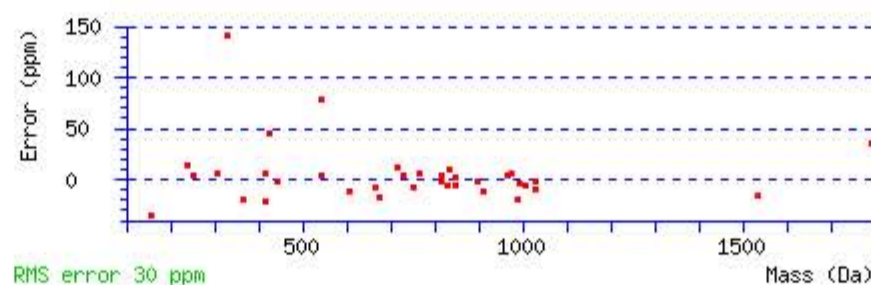

NCBI BLAST search of **RPYQEGTPCSQCPSGYHCK**  
 (Parameters: blastp, nr protein database, expect=20000, no filter, PAM30)  
 Other BLAST [web gateways](#)

### All matches to this query

| Score | $M_r(\text{calc})$ : | Delta     | Sequence                            |
|-------|----------------------|-----------|-------------------------------------|
| 31.3  | 2622.123611          | -0.006995 | <a href="#">RPYQEGTPCSQCPSGYHCK</a> |



# Mascot Search Results

## Peptide View

MS/MS Fragmentation of **RPYQEGTPCSQCPSGYHCK**  
Found in **PI16\_HUMAN**, Peptidase inhibitor 16 OS=Homo sapiens GN=PI16 PE=1 SV=1

Match to Query 53346: 2933.274696 from(734.325950,4+) rtinseconds(1609) index(29468)  
Title: Locus:1.1.1.3223.20 File:"2013-07-02 CLN FXIII 180 min 3rd F 3.wiff"  
Data file C:\Program Files (x86)\Matrix Science\Mascot Daemon\mgf9 FXIII 180 min 3rd\mascot\_daemon\_merge.mgf

Click mouse within plot area to zoom in by factor of two about that point  
Or, Plot from 0 to 3000 Da Full range  
Label all possible matches  Label matches used for scoring

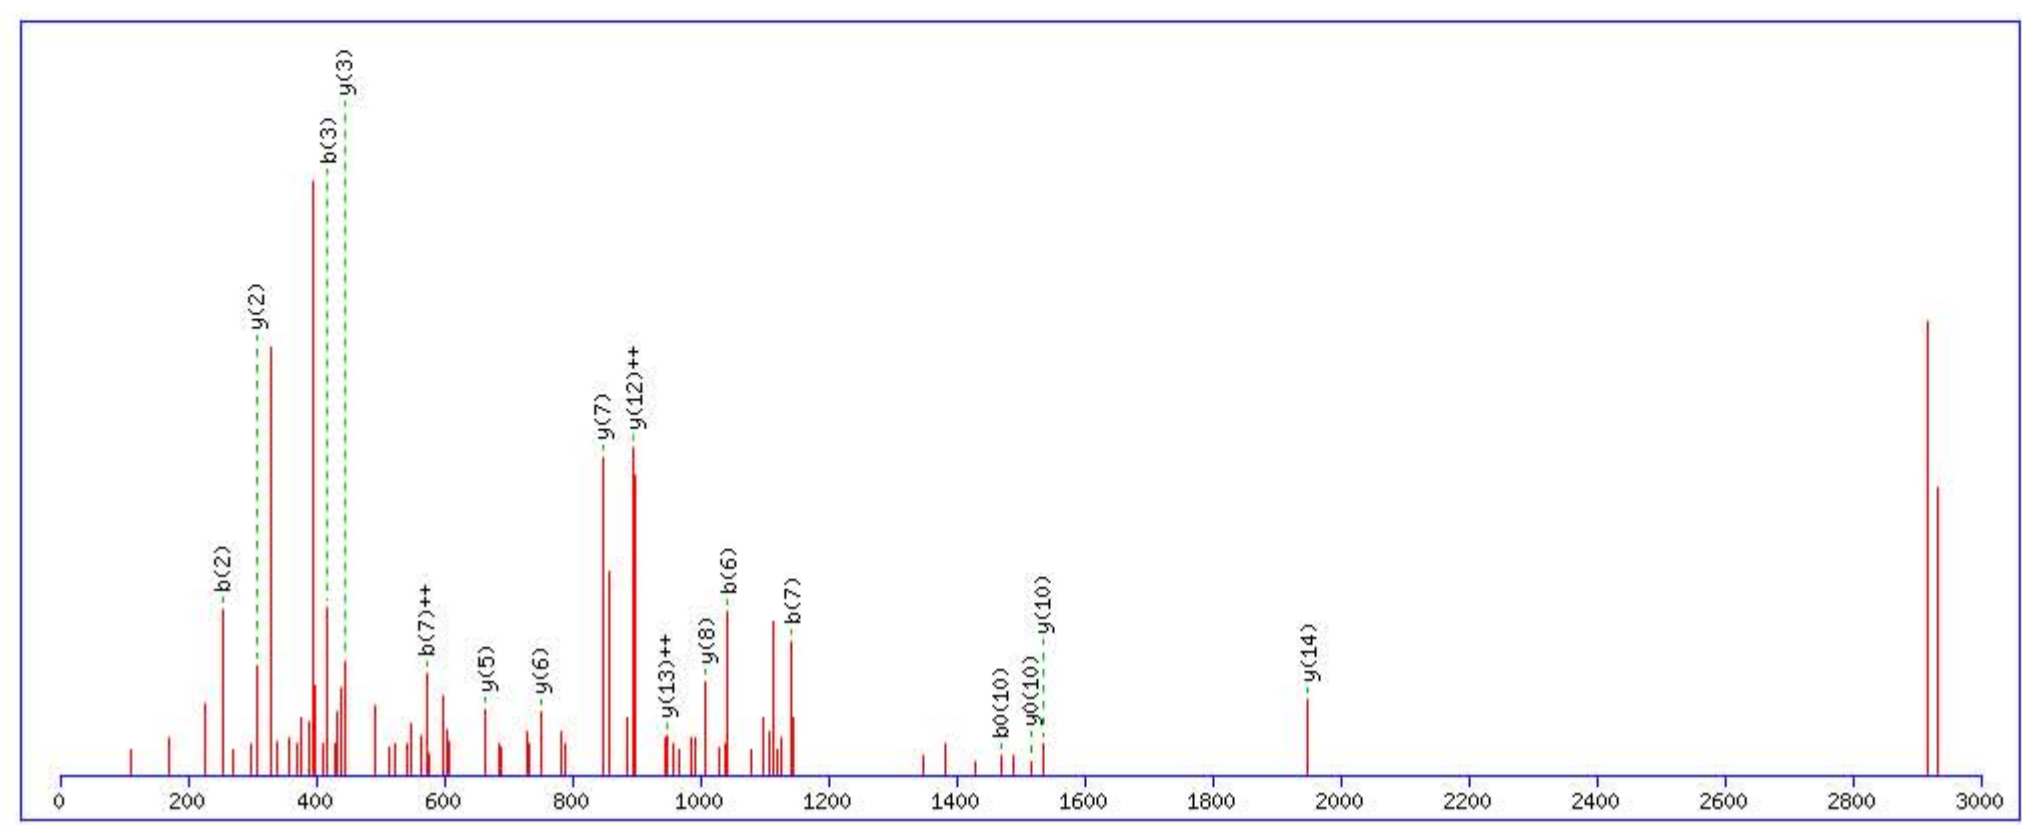

Monoisotopic mass of neutral peptide Mr(calc): 2933.290359  
Fixed modifications: Carbamidomethyl (C) (apply to specified residues or termini only)  
Variable modifications:  
Q4 : Biotin:Thermo-21345 (Q)  
Q11 : Biotin:Thermo-21345 (Q)  
Ions Score: 41 Expect: 0.0004  
Matches : 17/198 fragment ions using 30 most intense peaks [\(help\)](#)

| #  | b                  | b <sup>++</sup>   | b <sup>+</sup> | b <sup>+++</sup> | b <sup>0</sup>     | b <sup>0++</sup> | Seq. | y                  | y <sup>++</sup>   | y <sup>+</sup> | y <sup>+++</sup> | y <sup>0</sup>     | y <sup>0++</sup> | #  |
|----|--------------------|-------------------|----------------|------------------|--------------------|------------------|------|--------------------|-------------------|----------------|------------------|--------------------|------------------|----|
| 1  | 157.108387         | 79.057831         | 140.081838     | 70.544557        |                    |                  | R    |                    |                   |                |                  |                    |                  | 19 |
| 2  | <b>254.161151</b>  | 127.584213        | 237.134602     | 119.070939       |                    |                  | P    | 2778.196521        | 1389.601898       | 2761.169972    | 1381.088624      | 2760.185956        | 1380.596616      | 18 |
| 3  | <b>417.224480</b>  | 209.115878        | 400.197931     | 200.602604       |                    |                  | Y    | 2681.143757        | 1341.075516       | 2664.117208    | 1332.562242      | 2663.133192        | 1332.070234      | 17 |
| 4  | 856.449806         | 428.728541        | 839.423257     | 420.215267       |                    |                  | Q    | 2518.080428        | 1259.543852       | 2501.053879    | 1251.030577      | 2500.069863        | 1250.538569      | 16 |
| 5  | 985.492399         | 493.249838        | 968.465850     | 484.736563       | 967.481834         | 484.244555       | E    | 2078.855102        | 1039.931189       | 2061.828553    | 1031.417914      | 2060.844537        | 1030.925906      | 15 |
| 6  | <b>1042.513863</b> | 521.760570        | 1025.487314    | 513.247295       | 1024.503298        | 512.755287       | G    | <b>1949.812509</b> | 975.409893        | 1932.785960    | 966.896618       | 1931.801944        | 966.404610       | 14 |
| 7  | <b>1143.561542</b> | <b>572.284409</b> | 1126.534993    | 563.771135       | 1125.550977        | 563.279127       | T    | 1892.791045        | <b>946.899160</b> | 1875.764496    | 938.385886       | 1874.780480        | 937.893878       | 13 |
| 8  | 1240.614306        | 620.810791        | 1223.587757    | 612.297517       | 1222.603741        | 611.805509       | P    | 1791.743366        | <b>896.375321</b> | 1774.716817    | 887.862047       | 1773.732801        | 887.370038       | 12 |
| 9  | 1400.644955        | 700.826116        | 1383.618406    | 692.312841       | 1382.634390        | 691.820833       | C    | 1694.690602        | 847.848939        | 1677.664053    | 839.335665       | 1676.680037        | 838.843656       | 11 |
| 10 | 1487.676983        | 744.342130        | 1470.650434    | 735.828855       | <b>1469.666418</b> | 735.336847       | S    | <b>1534.659953</b> | 767.833614        | 1517.633404    | 759.320340       | <b>1516.649388</b> | 758.828332       | 10 |
| 11 | 1926.902309        | 963.954793        | 1909.875760    | 955.441518       | 1908.891744        | 954.949510       | Q    | 1447.627925        | 724.317600        | 1430.601376    | 715.804326       | 1429.617360        | 715.312318       | 9  |
| 12 | 2086.932958        | 1043.970117       | 2069.906409    | 1035.456842      | 2068.922393        | 1034.964834      | C    | <b>1008.402599</b> | 504.704937        | 991.376050     | 496.191663       | 990.392034         | 495.699655       | 8  |
| 13 | 2183.985722        | 1092.496499       | 2166.959173    | 1083.983224      | 2165.975157        | 1083.491216      | P    | <b>848.371950</b>  | 424.689613        | 831.345401     | 416.176338       | 830.361385         | 415.684330       | 7  |
| 14 | 2271.017750        | 1136.012513       | 2253.991201    | 1127.499238      | 2253.007185        | 1127.007230      | S    | <b>751.319186</b>  | 376.163231        | 734.292637     | 367.649956       | 733.308621         | 367.157948       | 6  |
| 15 | 2328.039214        | 1164.523245       | 2311.012665    | 1156.009970      | 2310.028649        | 1155.517962      | G    | <b>664.287158</b>  | 332.647217        | 647.260609     | 324.133942       |                    |                  | 5  |
| 16 | 2491.102543        | 1246.054909       | 2474.075994    | 1237.541635      | 2473.091978        | 1237.049627      | Y    | 607.265694         | 304.136485        | 590.239145     | 295.623210       |                    |                  | 4  |
| 17 | 2628.161455        | 1314.584365       | 2611.134906    | 1306.071091      | 2610.150890        | 1305.579083      | H    | <b>444.202365</b>  | 222.604820        | 427.175816     | 214.091546       |                    |                  | 3  |
| 18 | 2788.192104        | 1394.599690       | 2771.165555    | 1386.086415      | 2770.181539        | 1385.594407      | C    | <b>307.143453</b>  | 154.075364        | 290.116904     | 145.562090       |                    |                  | 2  |
| 19 |                    |                   |                |                  |                    |                  | K    | 147.112804         | 74.060040         | 130.086255     | 65.546765        |                    |                  | 1  |

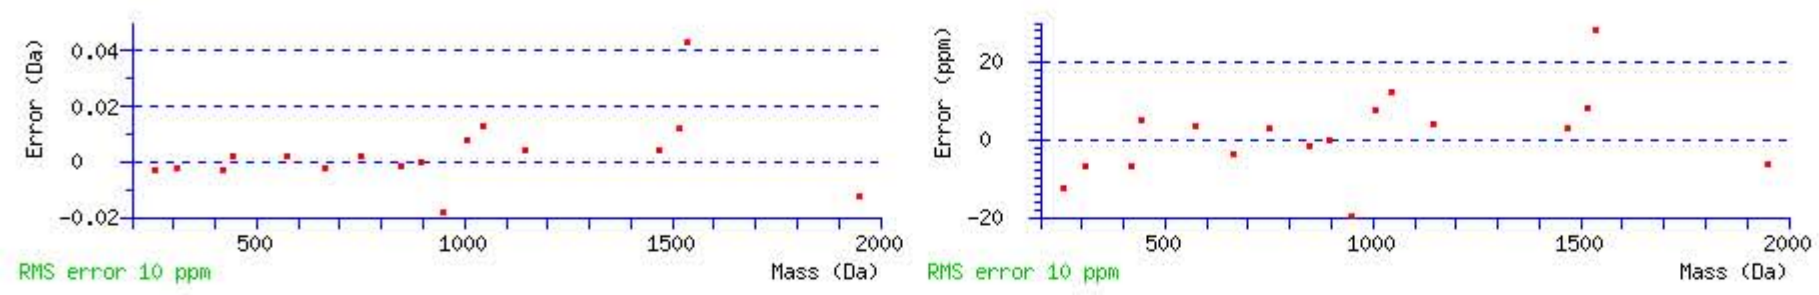

NCBI BLAST search of **RPYQEGTPCSQCPSGYHCK**  
(Parameters: blastp, nr protein database, expect=20000, no filter, PAM30)  
Other BLAST [web gateways](#)

### All matches to this query

| Score | Mr(calc):   | Delta     | Sequence                            |
|-------|-------------|-----------|-------------------------------------|
| 40.9  | 2933.290359 | -0.015663 | <a href="#">RPYQEGTPCSQCPSGYHCK</a> |

# MASCOT Search Results

## Peptide View

MS/MS Fragmentation of **TMFIGGSQLSQK**

Found in **PHLD\_HUMAN**, Phosphatidylinositol-glycan-specific phospholipase D OS=Homo sapiens GN=GPLD1 PE=1 SV=3

Match to Query 30750: 1606.810428 from(804.412490,2+) rtinseconds(2131) index(32624)

Title: Locus:1.1.1.3405.16 File:"2013-07-02 CLN FXIII 180 min 3rd F 3.wiff"

Data file C:\Program Files (x86)\Matrix Science\Mascot Daemon\mgf9 FXIII 180 min 3rd\mascot\_daemon\_merge.mgf

Click mouse within plot area to zoom in by factor of two about that point

Or, Plot from  to  Da

Label all possible matches  Label matches used for scoring

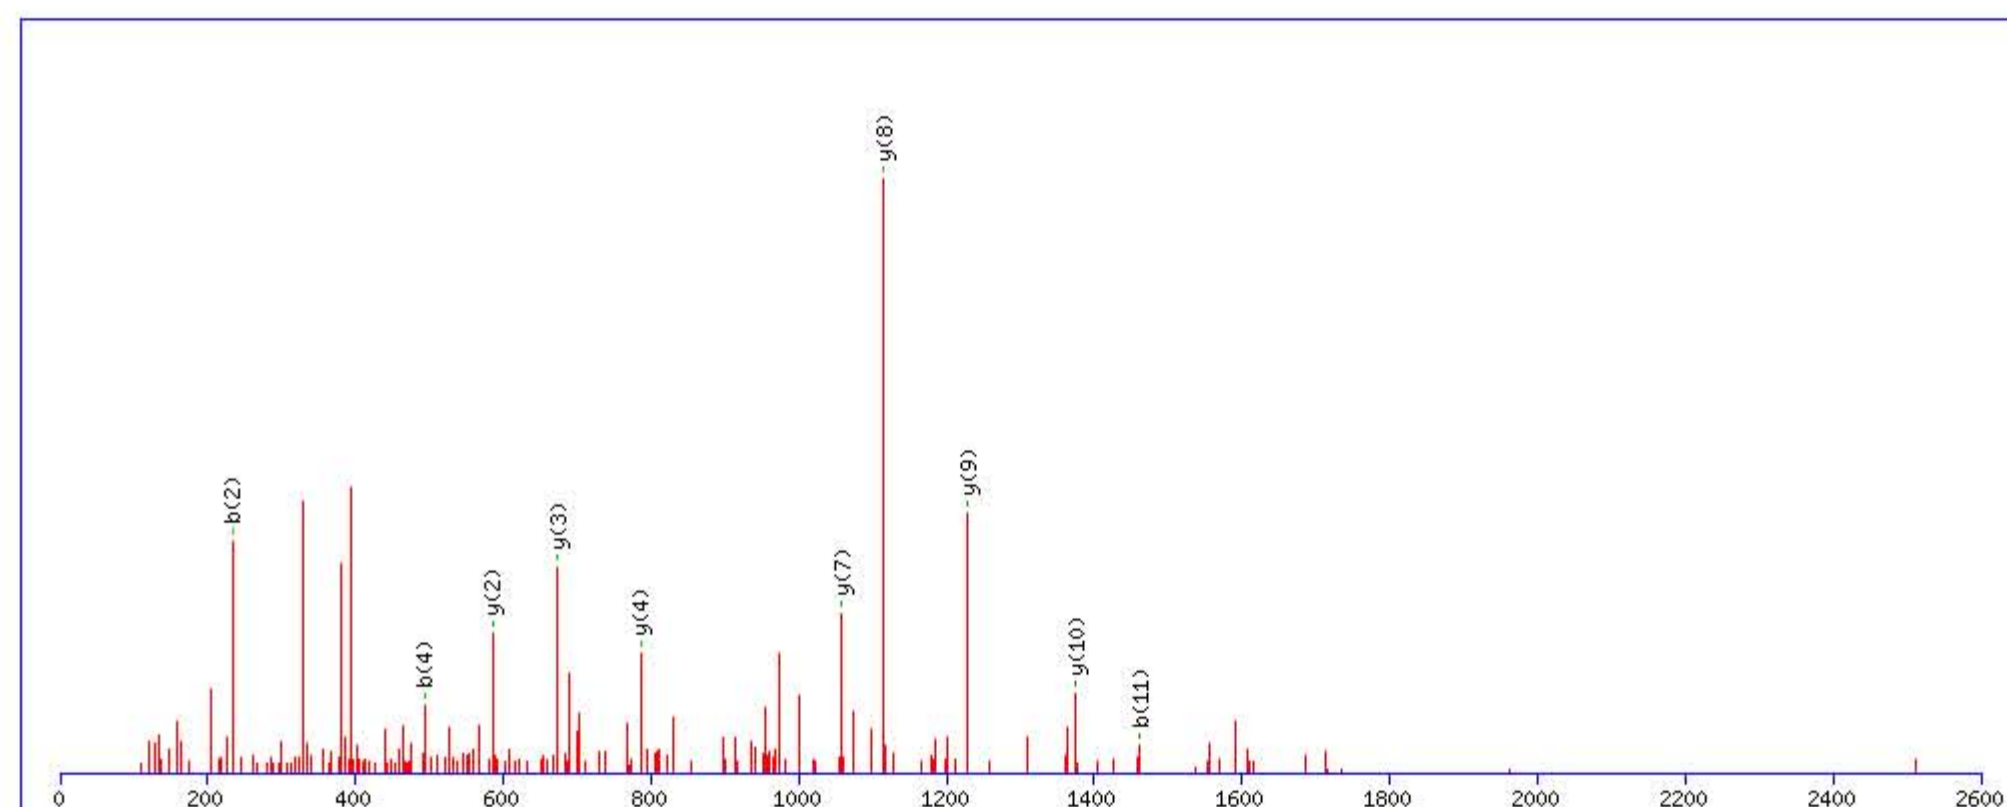

Monoisotopic mass of neutral peptide Mr(calc): 1606.821121

Fixed modifications: Carbamidomethyl (C) (apply to specified residues or termini only)

Variable modifications:

Q11 : Biotin:Thermo-21345 (Q)

Ions Score: 52 Expect: 2.4e-005

Matches : 10/114 fragment ions using 15 most intense peaks [\(help\)](#)

| #  | b                  | b <sup>++</sup> | b <sup>*</sup> | b <sup>***</sup> | b <sup>0</sup> | b <sup>0++</sup> | Seq. | y                  | y <sup>++</sup> | y <sup>*</sup> | y <sup>***</sup> | y <sup>0</sup> | y <sup>0++</sup> | #  |
|----|--------------------|-----------------|----------------|------------------|----------------|------------------|------|--------------------|-----------------|----------------|------------------|----------------|------------------|----|
| 1  | 102.054955         | 51.531116       |                |                  | 84.044390      | 42.525833        | T    |                    |                 |                |                  |                |                  | 12 |
| 2  | <b>233.095440</b>  | 117.051358      |                |                  | 215.084875     | 108.046076       | M    | 1506.780719        | 753.893998      | 1489.754170    | 745.380723       | 1488.770154    | 744.888715       | 11 |
| 3  | 380.163854         | 190.585565      |                |                  | 362.153289     | 181.580282       | F    | <b>1375.740234</b> | 688.373755      | 1358.713685    | 679.860481       | 1357.729669    | 679.368473       | 10 |
| 4  | <b>493.247918</b>  | 247.127597      |                |                  | 475.237353     | 238.122314       | I    | <b>1228.671820</b> | 614.839548      | 1211.645271    | 606.326274       | 1210.661255    | 605.834266       | 9  |
| 5  | 550.269382         | 275.638329      |                |                  | 532.258817     | 266.633047       | G    | <b>1115.587756</b> | 558.297516      | 1098.561207    | 549.784242       | 1097.577191    | 549.292234       | 8  |
| 6  | 607.290846         | 304.149061      |                |                  | 589.280281     | 295.143779       | G    | <b>1058.566292</b> | 529.786784      | 1041.539743    | 521.273510       | 1040.555727    | 520.781502       | 7  |
| 7  | 694.322874         | 347.665075      |                |                  | 676.312309     | 338.659793       | S    | 1001.544828        | 501.276052      | 984.518279     | 492.762778       | 983.534263     | 492.270770       | 6  |
| 8  | 822.381452         | 411.694364      | 805.354903     | 403.181090       | 804.370887     | 402.689082       | Q    | 914.512800         | 457.760038      | 897.486251     | 449.246764       | 896.502235     | 448.754756       | 5  |
| 9  | 935.465516         | 468.236396      | 918.438967     | 459.723122       | 917.454951     | 459.231114       | L    | <b>786.454222</b>  | 393.730749      | 769.427673     | 385.217475       | 768.443657     | 384.725467       | 4  |
| 10 | 1022.497544        | 511.752410      | 1005.470995    | 503.239136       | 1004.486979    | 502.747128       | S    | <b>673.370158</b>  | 337.188717      | 656.343609     | 328.675443       | 655.359593     | 328.183435       | 3  |
| 11 | <b>1461.722870</b> | 731.365073      | 1444.696321    | 722.851799       | 1443.712305    | 722.359791       | Q    | <b>586.338130</b>  | 293.672703      | 569.311581     | 285.159429       |                |                  | 2  |
| 12 |                    |                 |                |                  |                |                  | K    | 147.112804         | 74.060040       | 130.086255     | 65.546765        |                |                  | 1  |

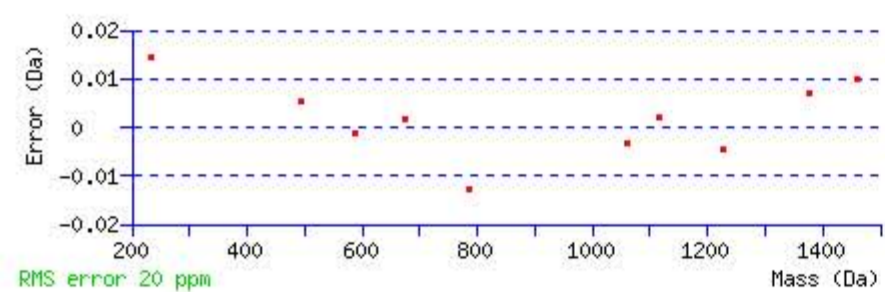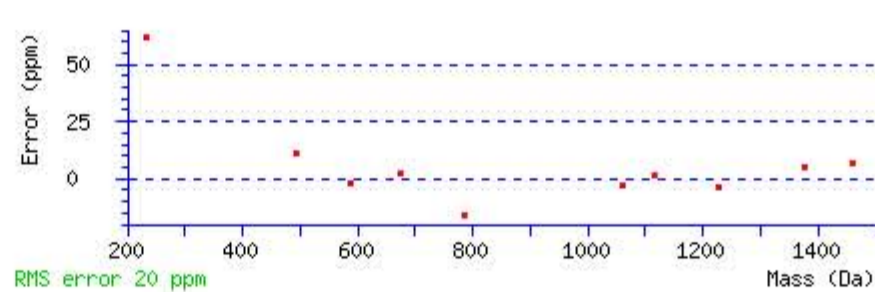

NCBI BLAST search of **TMFIGGSQLSQK**

(Parameters: blastp, nr protein database, expect=20000, no filter, PAM30)

Other BLAST [web gateways](#)

All matches to this query

| Score | Mr(calc):   | Delta     | Sequence                        |
|-------|-------------|-----------|---------------------------------|
| 51.6  | 1606.821121 | -0.010693 | <a href="#">TMFIGGSQLSQK</a>    |
| 19.1  | 1606.821121 | -0.010693 | <a href="#">TMFIGGSQLSQK</a>    |
| 2.2   | 1606.795959 | 0.014469  | <a href="#">VFMDRATNQSK</a>     |
| 2.1   | 1606.798447 | 0.011981  | <a href="#">KSNTILGSQEGNTMK</a> |
| 0.8   | 1606.809692 | 0.000736  | <a href="#">KAIQRTVSSSGCEGK</a> |
| 0.6   | 1606.809860 | 0.000568  | <a href="#">AIPEYMTISQK</a>     |

Mascot: <http://www.matrixscience.com/>

# MASCOT Search Results

## Peptide View

MS/MS Fragmentation of **QVLLVGAPTYDDVSK**

Found in **PHLD\_HUMAN**, Phosphatidylinositol-glycan-specific phospholipase D OS=Homo sapiens GN=GPLD1 PE=1 SV=3

Match to Query 37719: 1915.005582 from(639.342470,3+) rtinseconds(2318) index(33696)

Title: Locus:1.1.1.3471.7 File:"2013-07-02 CLN FXIII 180 min 3rd F 3.wiff"

Data file C:\Program Files (x86)\Matrix Science\Mascot Daemon\mgf\9 FXIII 180 min 3rd\mascot\_daemon\_merge.mgf

Click mouse within plot area to zoom in by factor of two about that point

Or, Plot from 100 to 1300 Da Full range

Label all possible matches  Label matches used for scoring

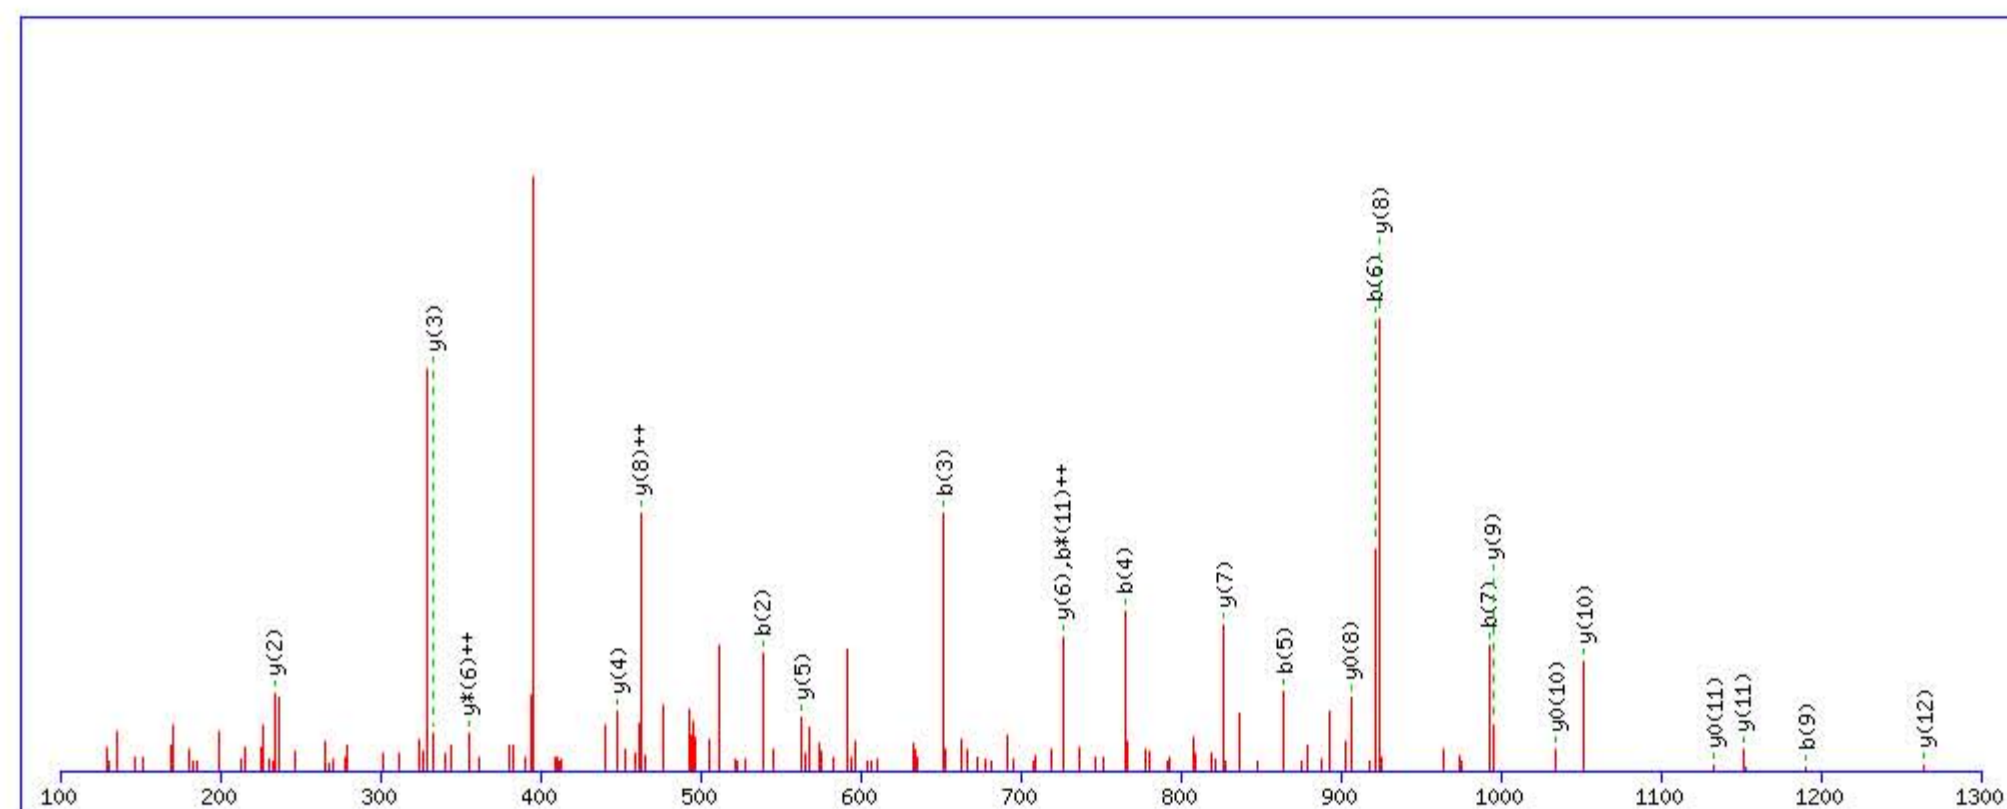

Monoisotopic mass of neutral peptide Mr(calc): 1915.012497

Fixed modifications: Carbamidomethyl (C) (apply to specified residues or termini only)

Variable modifications:

Q1 : Biotin:Thermo-21345 (Q)

Ions Score: 54 Expect: 1.1e-005

Matches : 24/150 fragment ions using 52 most intense peaks [\(help\)](#)

| #  | b                  | b <sup>++</sup> | b <sup>*</sup> | b <sup>+++</sup>  | b <sup>0</sup> | b <sup>0++</sup> | Seq. | y                  | y <sup>++</sup>   | y <sup>*</sup> | y <sup>+++</sup>  | y <sup>0</sup>     | y <sup>0++</sup> | #  |
|----|--------------------|-----------------|----------------|-------------------|----------------|------------------|------|--------------------|-------------------|----------------|-------------------|--------------------|------------------|----|
| 1  | 440.232602         | 220.619939      | 423.206053     | 212.106664        |                |                  | Q    |                    |                   |                |                   |                    |                  | 15 |
| 2  | <b>539.301016</b>  | 270.154146      | 522.274467     | 261.640872        |                |                  | V    | 1476.794438        | 738.900857        | 1459.767889    | 730.387583        | 1458.783873        | 729.895575       | 14 |
| 3  | <b>652.385080</b>  | 326.696178      | 635.358531     | 318.182904        |                |                  | L    | 1377.726024        | 689.366650        | 1360.699475    | 680.853376        | 1359.715459        | 680.361368       | 13 |
| 4  | <b>765.469144</b>  | 383.238210      | 748.442595     | 374.724936        |                |                  | L    | <b>1264.641960</b> | 632.824618        | 1247.615411    | 624.311344        | 1246.631395        | 623.819336       | 12 |
| 5  | <b>864.537558</b>  | 432.772417      | 847.511009     | 424.259143        |                |                  | V    | <b>1151.557896</b> | 576.282586        | 1134.531347    | 567.769312        | <b>1133.547331</b> | 567.277304       | 11 |
| 6  | <b>921.559022</b>  | 461.283149      | 904.532473     | 452.769875        |                |                  | G    | <b>1052.489482</b> | 526.748379        | 1035.462933    | 518.235105        | <b>1034.478917</b> | 517.743097       | 10 |
| 7  | <b>992.596136</b>  | 496.801706      | 975.569587     | 488.288432        |                |                  | A    | <b>995.468018</b>  | 498.237647        | 978.441469     | 489.724373        | 977.457453         | 489.232365       | 9  |
| 8  | 1089.648900        | 545.328088      | 1072.622351    | 536.814814        |                |                  | P    | <b>924.430904</b>  | <b>462.719090</b> | 907.404355     | 454.205816        | <b>906.420339</b>  | 453.713808       | 8  |
| 9  | <b>1190.696579</b> | 595.851927      | 1173.670030    | 587.338653        | 1172.686014    | 586.846645       | T    | <b>827.378140</b>  | 414.192708        | 810.351591     | 405.679434        | 809.367575         | 405.187426       | 7  |
| 10 | 1353.759908        | 677.383592      | 1336.733359    | 668.870318        | 1335.749343    | 668.378310       | Y    | <b>726.330461</b>  | 363.668869        | 709.303912     | <b>355.155594</b> | 708.319896         | 354.663586       | 6  |
| 11 | 1468.786851        | 734.897064      | 1451.760302    | <b>726.383789</b> | 1450.776286    | 725.891781       | D    | <b>563.267132</b>  | 282.137204        | 546.240583     | 273.623930        | 545.256567         | 273.131922       | 5  |
| 12 | 1583.813794        | 792.410535      | 1566.787245    | 783.897261        | 1565.803229    | 783.405253       | D    | <b>448.240189</b>  | 224.623733        | 431.213640     | 216.110458        | 430.229624         | 215.618450       | 4  |
| 13 | 1682.882208        | 841.944742      | 1665.855659    | 833.431468        | 1664.871643    | 832.939460       | V    | <b>333.213246</b>  | 167.110261        | 316.186697     | 158.596987        | 315.202681         | 158.104979       | 3  |
| 14 | 1769.914236        | 885.460756      | 1752.887687    | 876.947482        | 1751.903671    | 876.455474       | S    | <b>234.144832</b>  | 117.576054        | 217.118283     | 109.062780        | 216.134267         | 108.570772       | 2  |
| 15 |                    |                 |                |                   |                |                  | K    | 147.112804         | 74.060040         | 130.086255     | 65.546765         |                    |                  | 1  |

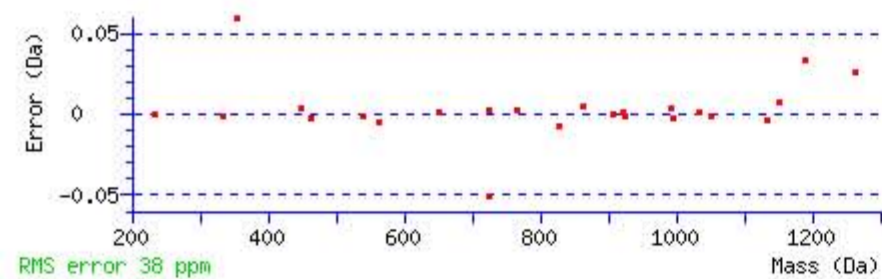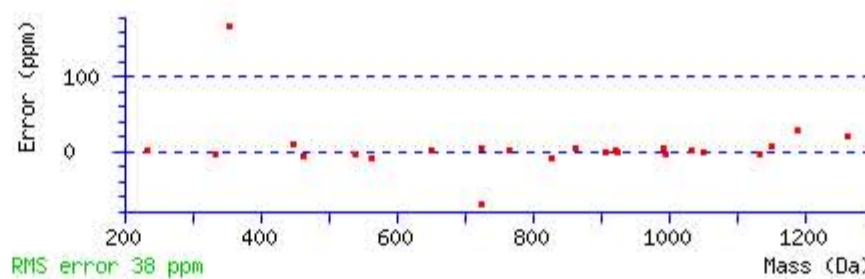

NCBI BLAST search of **QVLLVGAPTYDDVSK**

(Parameters: blastp, nr protein database, expect=20000, no filter, PAM30)

Other BLAST [web gateways](#)

### All matches to this query

| Score | Mr(calc):   | Delta     | Sequence                        |
|-------|-------------|-----------|---------------------------------|
| 54.1  | 1915.012497 | -0.006915 | <a href="#">QVLLVGAPTYDDVSK</a> |
| 1.4   | 1914.998550 | 0.007032  | <a href="#">LLAPEAGSHPQQTQK</a> |
| 1.4   | 1914.998550 | 0.007032  | <a href="#">LLAPEAGSHPQQTQK</a> |
| 1.4   | 1914.998550 | 0.007032  | <a href="#">LLAPEAGSHPQQTQK</a> |
| 0.2   | 1915.027710 | -0.022128 | <a href="#">DYPIYLLKFKQCLSK</a> |
| 0.2   | 1915.008438 | -0.002856 | <a href="#">VIQKNQEETTSISK</a>  |

# MATRIX SCIENCE Mascot Search Results

## Peptide View

MS/MS Fragmentation of **VSSVEECQK**

Found in **KLKB1\_HUMAN**, Plasma kallikrein OS=Homo sapiens GN=KLKB1 PE=1 SV=1

Match to Query 22803: 1375.646888 from(688.830720,2+) rtinseconds(1402) index(57313)

Title: Locus:1.1.1.1399.20 File:"2013-07-02 CLN FXIII 180 min 3rd FT.wiff"

Data file C:\Program Files (x86)\Matrix Science\Mascot Daemon\mgf\9 FXIII 180 min 3rd\mascot\_daemon\_merge.mgf

Click mouse within plot area to zoom in by factor of two about that point

Or, Plot from  to  Da

Label all possible matches  Label matches used for scoring

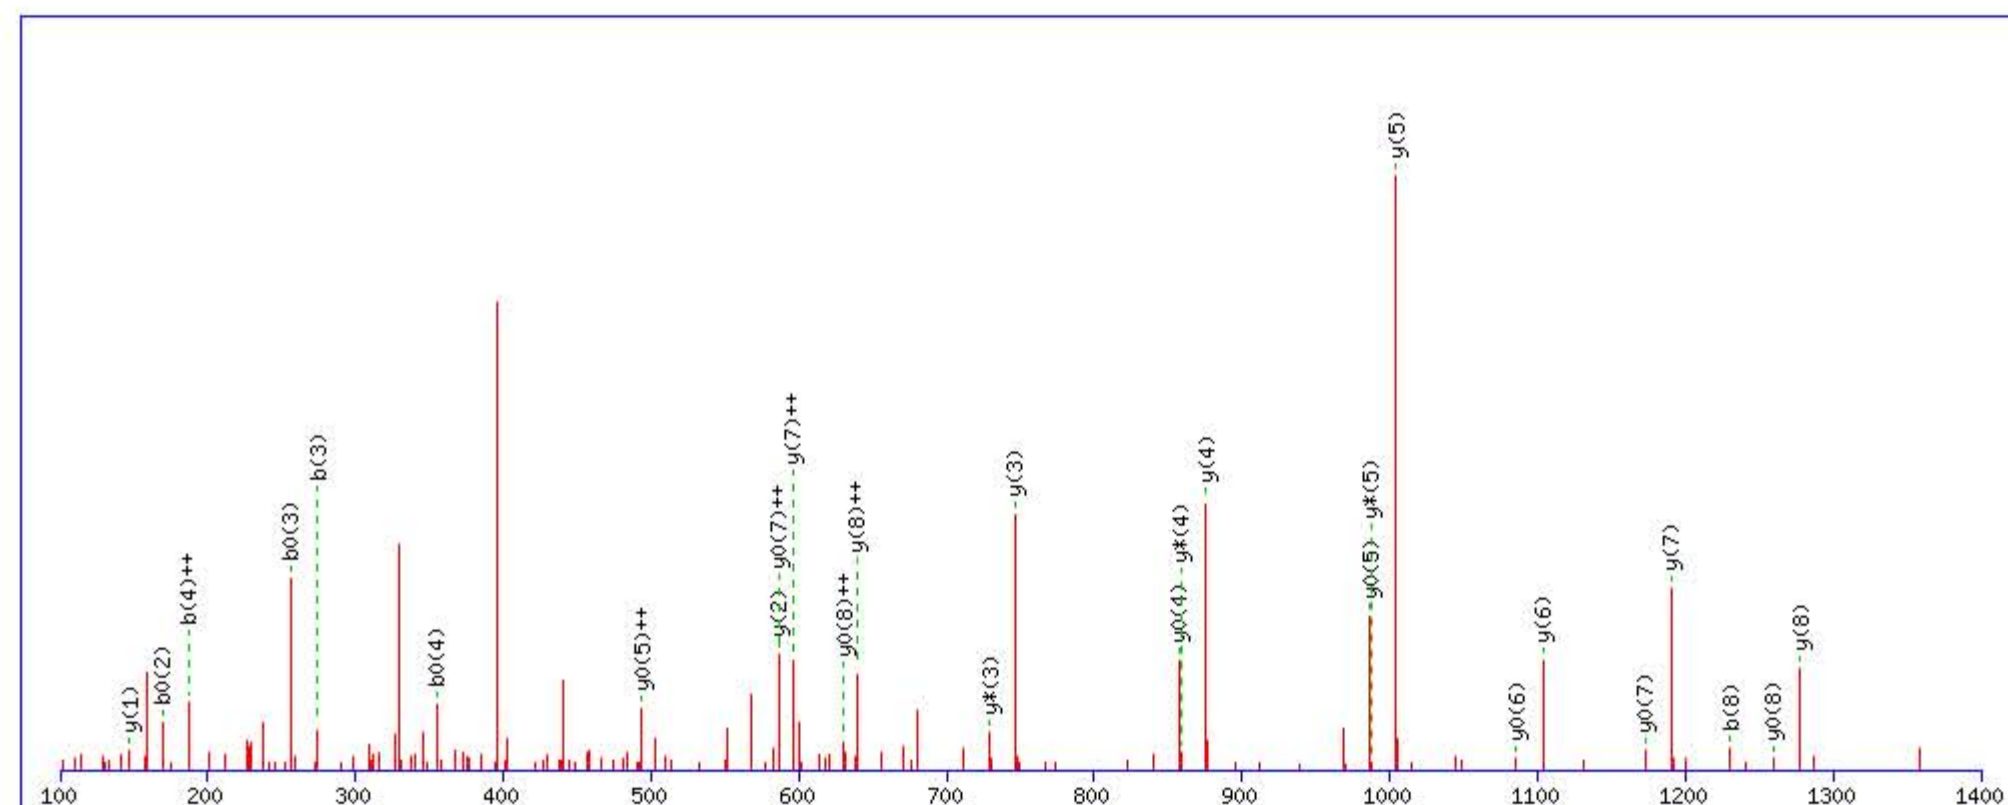

Monoisotopic mass of neutral peptide Mr(calc): 1375.647568

Fixed modifications: Carbamidomethyl (C) (apply to specified residues or termini only)

Variable modifications:

Q8 : Biotin:Thermo-21345 (Q)

Ions Score: 49 Expect: 0.00019

Matches : 28/74 fragment ions using 49 most intense peaks [\(help\)](#)

| # | b           | b <sup>++</sup> | b <sup>+</sup> | b <sup>*++</sup> | b <sup>0</sup> | b <sup>0++</sup> | Seq. | y           | y <sup>++</sup> | y <sup>+</sup> | y <sup>*++</sup> | y <sup>0</sup> | y <sup>0++</sup> | # |
|---|-------------|-----------------|----------------|------------------|----------------|------------------|------|-------------|-----------------|----------------|------------------|----------------|------------------|---|
| 1 | 100.075690  | 50.541483       |                |                  |                |                  | V    |             |                 |                |                  |                |                  | 9 |
| 2 | 187.107718  | 94.057497       |                |                  | 169.097153     | 85.052214        | S    | 1277.586435 | 639.296856      | 1260.559886    | 630.783581       | 1259.575870    | 630.291573       | 8 |
| 3 | 274.139746  | 137.573511      |                |                  | 256.129181     | 128.568229       | S    | 1190.554407 | 595.780842      | 1173.527858    | 587.267567       | 1172.543842    | 586.775559       | 7 |
| 4 | 373.208160  | 187.107718      |                |                  | 355.197595     | 178.102436       | V    | 1103.522379 | 552.264828      | 1086.495830    | 543.751553       | 1085.511814    | 543.259545       | 6 |
| 5 | 502.250753  | 251.629015      |                |                  | 484.240188     | 242.623732       | E    | 1004.453965 | 502.730621      | 987.427416     | 494.217346       | 986.443400     | 493.725338       | 5 |
| 6 | 631.293346  | 316.150311      |                |                  | 613.282781     | 307.145029       | E    | 875.411372  | 438.209324      | 858.384823     | 429.696050       | 857.400807     | 429.204042       | 4 |
| 7 | 791.323995  | 396.165636      |                |                  | 773.313430     | 387.160353       | C    | 746.368779  | 373.688028      | 729.342230     | 365.174753       |                |                  | 3 |
| 8 | 1230.549321 | 615.778299      | 1213.522772    | 607.265024       | 1212.538756    | 606.773016       | Q    | 586.338130  | 293.672703      | 569.311581     | 285.159429       |                |                  | 2 |
| 9 |             |                 |                |                  |                |                  | K    | 147.112804  | 74.060040       | 130.086255     | 65.546765        |                |                  | 1 |

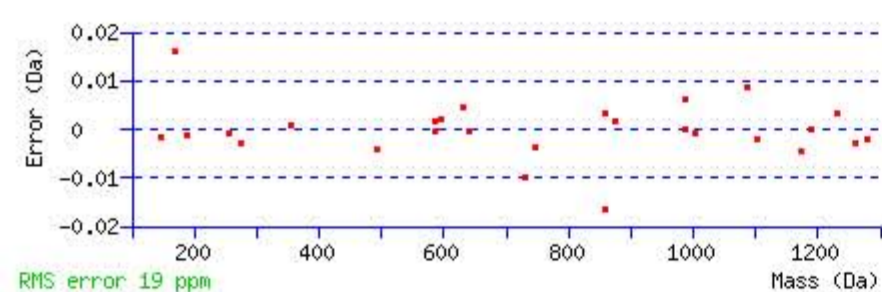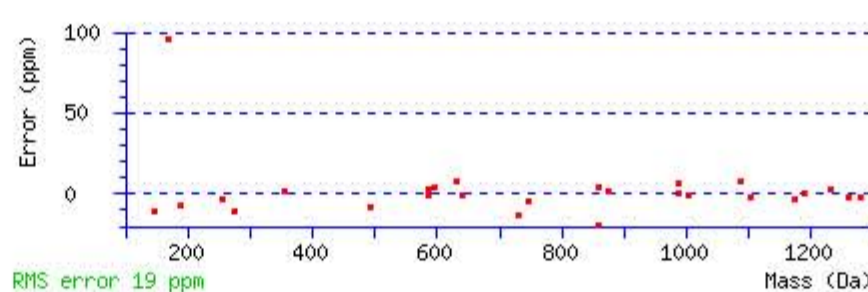

NCBI BLAST search of **VSSVEECQK**

(Parameters: blastp, nr protein database, expect=20000, no filter, PAM30)

Other BLAST [web gateways](#)

All matches to this query

| Score | Mr(calc):   | Delta     | Sequence                      |
|-------|-------------|-----------|-------------------------------|
| 48.8  | 1375.647568 | -0.000680 | <a href="#">VSSVEECQK</a>     |
| 9.8   | 1375.662827 | -0.015939 | <a href="#">GFSIPECQK</a>     |
| 2.6   | 1375.665329 | -0.018441 | <a href="#">ADVSLPSMQGDLK</a> |
| 0.5   | 1375.665314 | -0.018426 | <a href="#">VSLMTSSEEIHK</a>  |

Mascot: <http://www.matrixscience.com/>

# MASCOT Search Results

## Peptide View

MS/MS Fragmentation of **EKGEIQNILQK**

Found in **KLKB1\_HUMAN**, Plasma kallikrein OS=Homo sapiens GN=KLKB1 PE=1 SV=1

Match to Query 30908: 1609.881912 from(537.634580,3+) rtinseconds(1887) index(18203)

Title: Locus:1.1.1.3223.4 File:"2013-07-02 CLN FXIII 180 min 3rd F 2.wiff"

Data file C:\Program Files (x86)\Matrix Science\Mascot Daemon\mgf\9 FXIII 180 min 3rd\mascot\_daemon\_merge.mgf

Click mouse within plot area to zoom in by factor of two about that point

Or, Plot from  to  Da

Label all possible matches  Label matches used for scoring

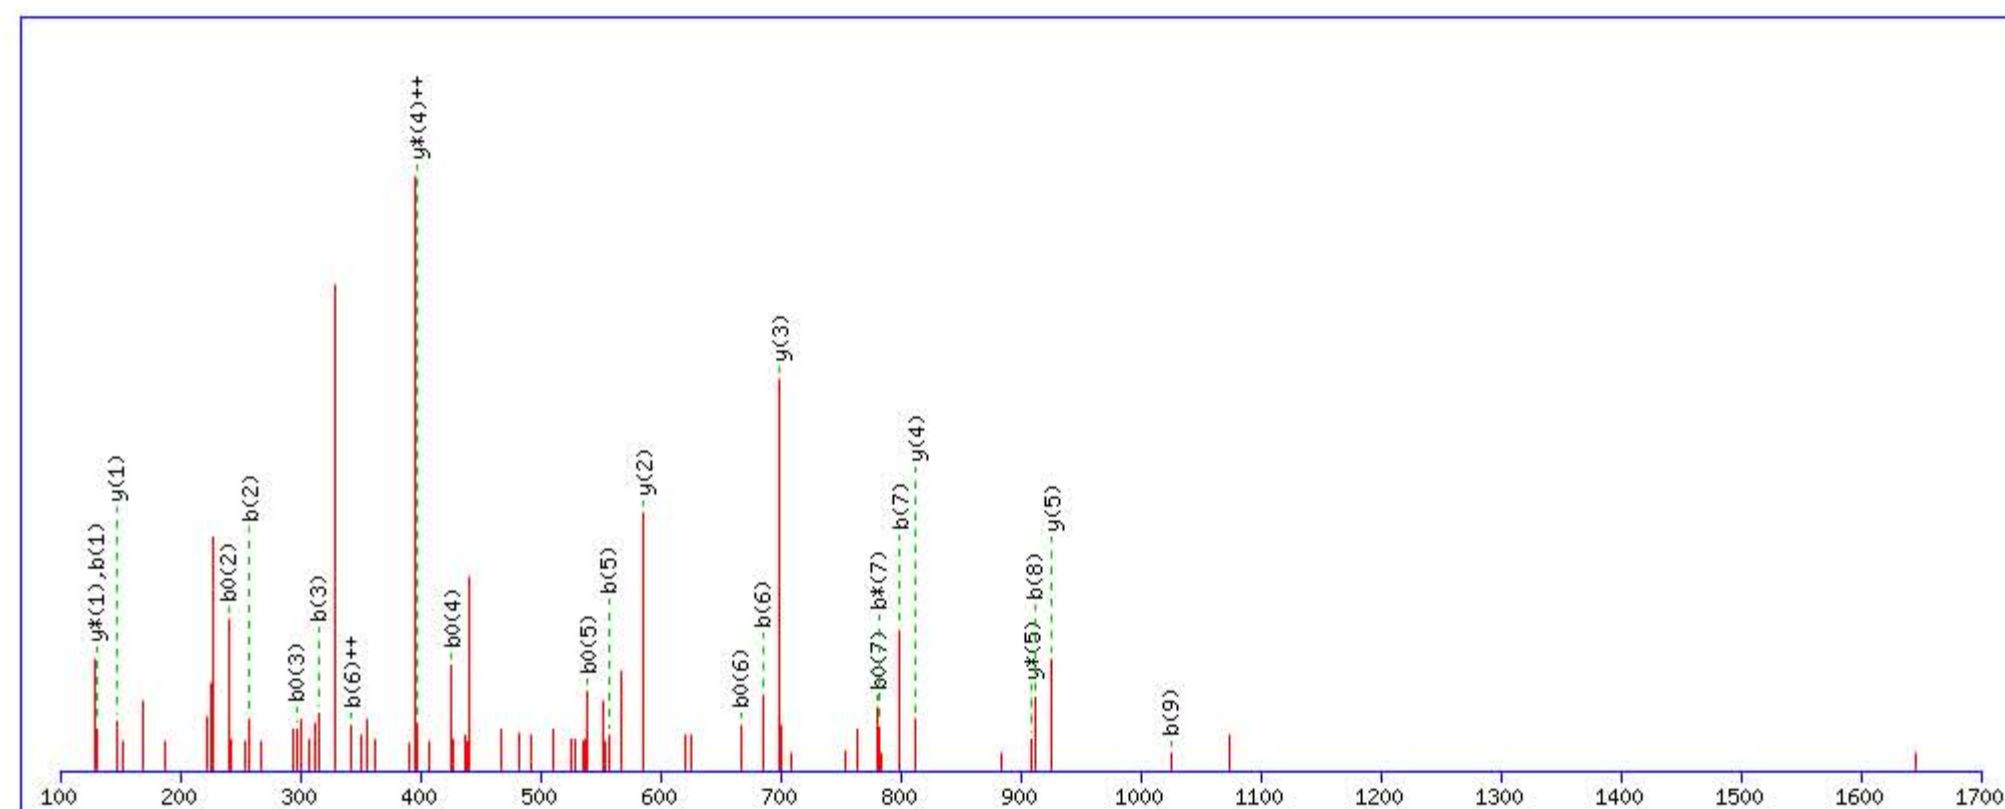

Monoisotopic mass of neutral peptide Mr(calc): 1609.886124

Fixed modifications: Carbamidomethyl (C) (apply to specified residues or termini only)

Variable modifications:

Q10 : Biotin:Thermo-21345 (Q)

Ions Score: 32 Expect: 0.013

Matches : 24/104 fragment ions using 53 most intense peaks [\(help\)](#)

| #  | b           | b <sup>++</sup> | b <sup>*</sup> | b <sup>+++</sup> | b <sup>0</sup> | b <sup>0++</sup> | Seq. | y           | y <sup>++</sup> | y <sup>*</sup> | y <sup>+++</sup> | y <sup>0</sup> | y <sup>0++</sup> | #  |
|----|-------------|-----------------|----------------|------------------|----------------|------------------|------|-------------|-----------------|----------------|------------------|----------------|------------------|----|
| 1  | 130.049869  | 65.528572       |                |                  | 112.039304     | 56.523290        | E    |             |                 |                |                  |                |                  | 11 |
| 2  | 258.144832  | 129.576054      | 241.118283     | 121.062780       | 240.134267     | 120.570772       | K    | 1481.850847 | 741.429061      | 1464.824298    | 732.915787       | 1463.840282    | 732.423779       | 10 |
| 3  | 315.166296  | 158.086786      | 298.139747     | 149.573512       | 297.155731     | 149.081504       | G    | 1353.755884 | 677.381580      | 1336.729335    | 668.868306       | 1335.745319    | 668.376297       | 9  |
| 4  | 444.208889  | 222.608082      | 427.182340     | 214.094808       | 426.198324     | 213.602800       | E    | 1296.734420 | 648.870848      | 1279.707871    | 640.357574       | 1278.723855    | 639.865566       | 8  |
| 5  | 557.292953  | 279.150115      | 540.266404     | 270.636840       | 539.282388     | 270.144832       | I    | 1167.691827 | 584.349552      | 1150.665278    | 575.836277       |                |                  | 7  |
| 6  | 685.351531  | 343.179404      | 668.324982     | 334.666129       | 667.340966     | 334.174121       | Q    | 1054.607763 | 527.807520      | 1037.581214    | 519.294245       |                |                  | 6  |
| 7  | 799.394458  | 400.200867      | 782.367909     | 391.687592       | 781.383893     | 391.195585       | N    | 926.549185  | 463.778231      | 909.522636     | 455.264956       |                |                  | 5  |
| 8  | 912.478522  | 456.742899      | 895.451973     | 448.229625       | 894.467957     | 447.737617       | I    | 812.506258  | 406.756767      | 795.479709     | 398.243493       |                |                  | 4  |
| 9  | 1025.562586 | 513.284931      | 1008.536037    | 504.771657       | 1007.552021    | 504.279649       | L    | 699.422194  | 350.214735      | 682.395645     | 341.701461       |                |                  | 3  |
| 10 | 1464.787912 | 732.897594      | 1447.761363    | 724.384320       | 1446.777347    | 723.892312       | Q    | 586.338130  | 293.672703      | 569.311581     | 285.159429       |                |                  | 2  |
| 11 |             |                 |                |                  |                |                  | K    | 147.112804  | 74.060040       | 130.086255     | 65.546765        |                |                  | 1  |

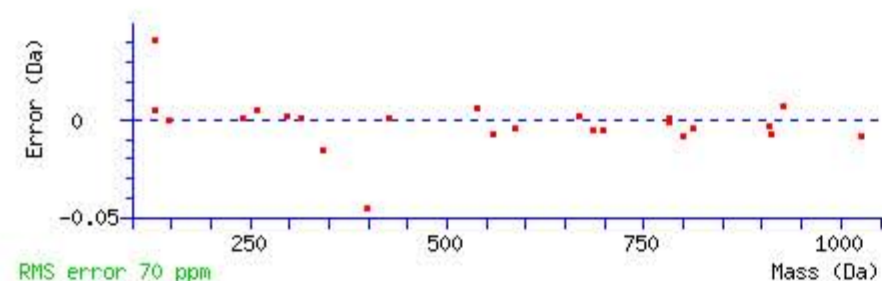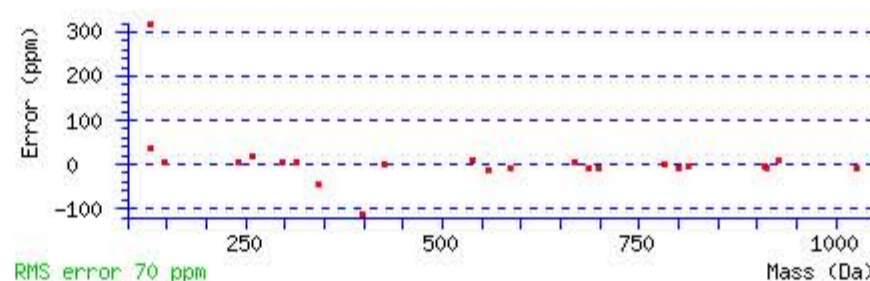

NCBI BLAST search of **EKGEIQNILQK**

(Parameters: blastp, nr protein database, expect=20000, no filter, PAM30)

Other BLAST [web gateways](#)

All matches to this query

| Score | Mr(calc):   | Delta     | Sequence                        |
|-------|-------------|-----------|---------------------------------|
| 32.1  | 1609.886124 | -0.004212 | <a href="#">EKGEIQNILQK</a>     |
| 14.7  | 1609.872192 | 0.009720  | <a href="#">QEAERALKQAR</a>     |
| 2.8   | 1609.897400 | -0.015488 | <a href="#">TNLRIVDVGGQK</a>    |
| 1.9   | 1609.878754 | 0.003158  | <a href="#">AGPLTVNTEAQQLLR</a> |
| 1.1   | 1609.886154 | -0.004242 | <a href="#">KTVTAMDVYALKR</a>   |
| 0.9   | 1609.868393 | 0.013519  | <a href="#">TKVQEQQK</a>        |
| 0.3   | 1609.890839 | -0.008927 | <a href="#">RIHMMSLGLNLAR</a>   |

# MASCOT Search Results

## Peptide View

MS/MS Fragmentation of **IAYGTQGSSGYSLR**

Found in **KLKB1\_HUMAN**, Plasma kallikrein OS=Homo sapiens GN=KLKB1 PE=1 SV=1

Match to Query 35090: 1769.884768 from(885.949660,2+) rtinseconds(1918) index(59981)

Title: Locus:1.1.1.1579.25 File:"2013-07-02 CLN FXIII 180 min 3rd FT.wiff"

Data file C:\Program Files (x86)\Matrix Science\Mascot Daemon\mgf9 FXIII 180 min 3rd\mascot\_daemon\_merge.mgf

Click mouse within plot area to zoom in by factor of two about that point

Or, Plot from  to  Da

Label all possible matches  Label matches used for scoring

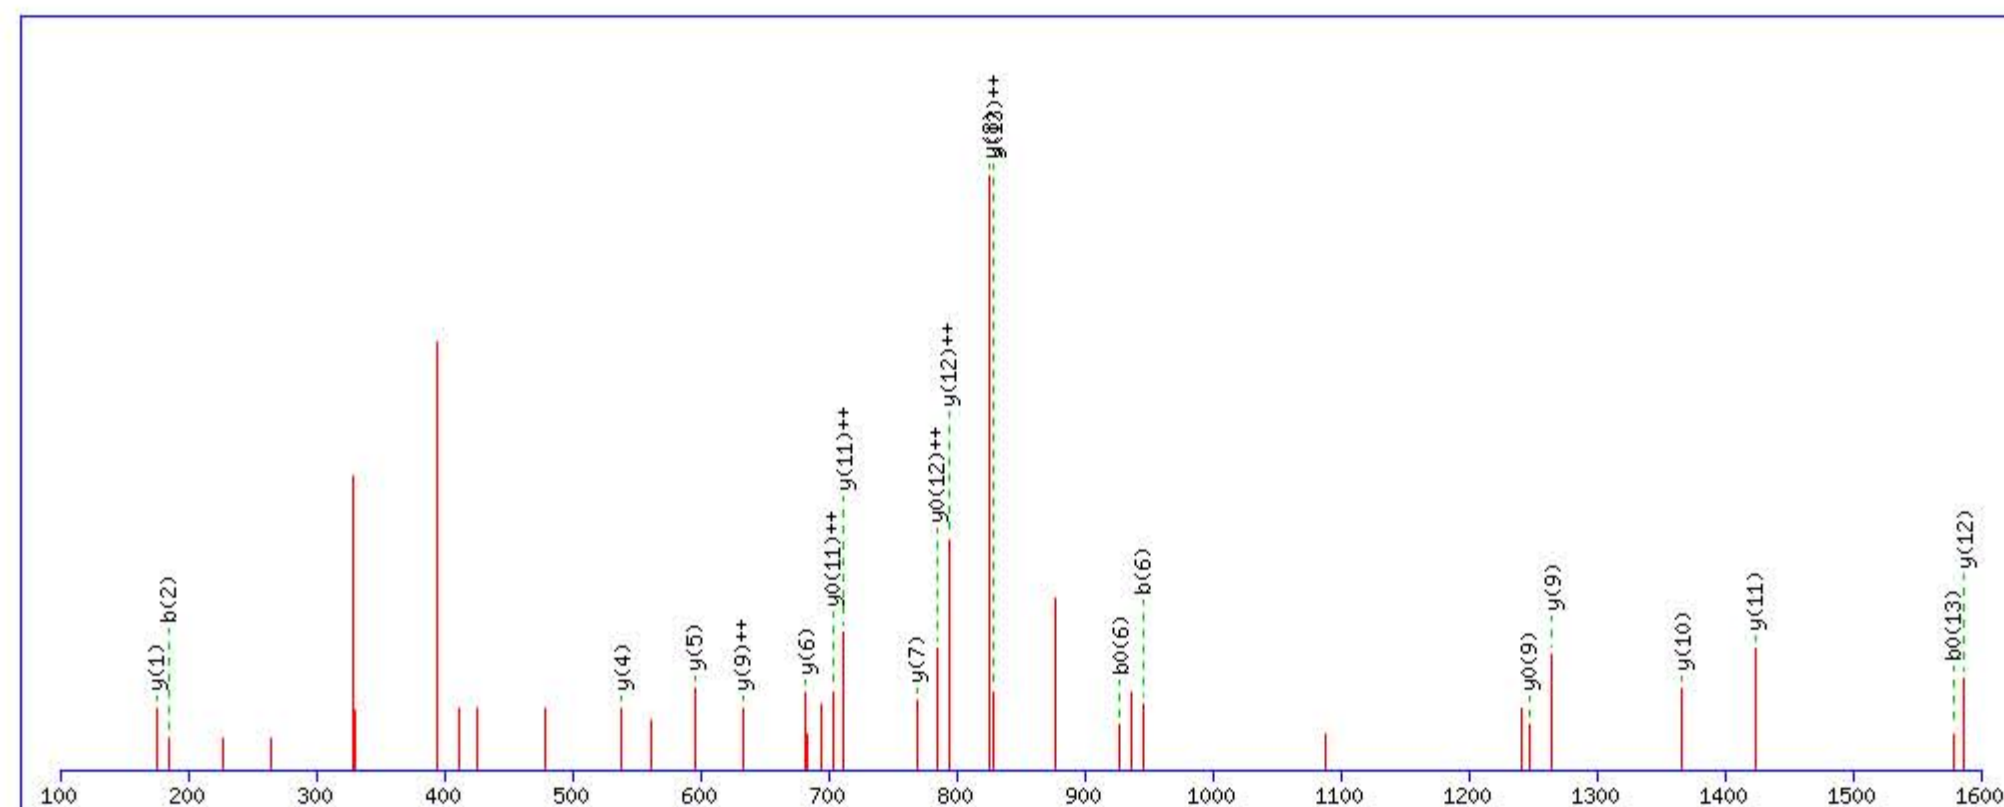

Monoisotopic mass of neutral peptide Mr(calc): 1769.877045

Fixed modifications: Carbamidomethyl (C) (apply to specified residues or termini only)

Variable modifications:

Q6 : Biotin:Thermo-21345 (Q)

Ions Score: 72 Expect: 4.2e-007

Matches : 21/134 fragment ions using 34 most intense peaks [\(help\)](#)

| #  | b                 | b <sup>++</sup> | b <sup>+</sup> | b <sup>+++</sup> | b <sup>0</sup>     | b <sup>0++</sup> | Seq. | y                  | y <sup>++</sup>   | y <sup>+</sup> | y <sup>+++</sup> | y <sup>0</sup>     | y <sup>0++</sup>  | #  |
|----|-------------------|-----------------|----------------|------------------|--------------------|------------------|------|--------------------|-------------------|----------------|------------------|--------------------|-------------------|----|
| 1  | 114.091340        | 57.549308       |                |                  |                    |                  | I    |                    |                   |                |                  |                    |                   | 14 |
| 2  | <b>185.128454</b> | 93.067865       |                |                  |                    |                  | A    | 1657.800269        | <b>829.403773</b> | 1640.773720    | 820.890498       | 1639.789704        | 820.398490        | 13 |
| 3  | 348.191783        | 174.599529      |                |                  |                    |                  | Y    | <b>1586.763155</b> | <b>793.885216</b> | 1569.736606    | 785.371941       | 1568.752590        | <b>784.879933</b> | 12 |
| 4  | 405.213247        | 203.110261      |                |                  |                    |                  | G    | <b>1423.699826</b> | <b>712.353551</b> | 1406.673277    | 703.840277       | 1405.689261        | <b>703.348269</b> | 11 |
| 5  | 506.260926        | 253.634101      |                |                  | 488.250361         | 244.628818       | T    | <b>1366.678362</b> | 683.842819        | 1349.651813    | 675.329545       | 1348.667797        | 674.837537        | 10 |
| 6  | <b>945.486252</b> | 473.246764      | 928.459703     | 464.733490       | <b>927.475687</b>  | 464.241482       | Q    | <b>1265.630683</b> | <b>633.318980</b> | 1248.604134    | 624.805705       | <b>1247.620118</b> | 624.313697        | 9  |
| 7  | 1002.507716       | 501.757496      | 985.481167     | 493.244222       | 984.497151         | 492.752214       | G    | <b>826.405357</b>  | 413.706317        | 809.378808     | 405.193042       | 808.394792         | 404.701034        | 8  |
| 8  | 1089.539744       | 545.273510      | 1072.513195    | 536.760236       | 1071.529179        | 536.268228       | S    | <b>769.383893</b>  | 385.195585        | 752.357344     | 376.682310       | 751.373328         | 376.190302        | 7  |
| 9  | 1176.571772       | 588.789524      | 1159.545223    | 580.276250       | 1158.561207        | 579.784242       | S    | <b>682.351865</b>  | 341.679571        | 665.325316     | 333.166296       | 664.341300         | 332.674288        | 6  |
| 10 | 1233.593236       | 617.300256      | 1216.566687    | 608.786982       | 1215.582671        | 608.294974       | G    | <b>595.319837</b>  | 298.163557        | 578.293288     | 289.650282       | 577.309272         | 289.158274        | 5  |
| 11 | 1396.656565       | 698.831921      | 1379.630016    | 690.318646       | 1378.646000        | 689.826638       | Y    | <b>538.298373</b>  | 269.652825        | 521.271824     | 261.139550       | 520.287808         | 260.647542        | 4  |
| 12 | 1483.688593       | 742.347935      | 1466.662044    | 733.834660       | 1465.678028        | 733.342652       | S    | 375.235044         | 188.121160        | 358.208495     | 179.607885       | 357.224479         | 179.115877        | 3  |
| 13 | 1596.772657       | 798.889967      | 1579.746108    | 790.376692       | <b>1578.762092</b> | 789.884684       | L    | 288.203016         | 144.605146        | 271.176467     | 136.091871       |                    |                   | 2  |
| 14 |                   |                 |                |                  |                    |                  | R    | <b>175.118952</b>  | 88.063114         | 158.092403     | 79.549839        |                    |                   | 1  |

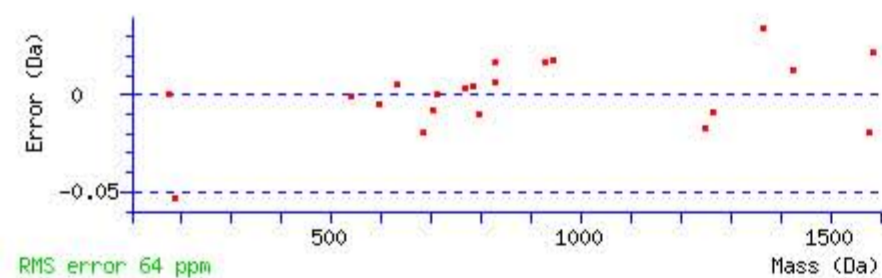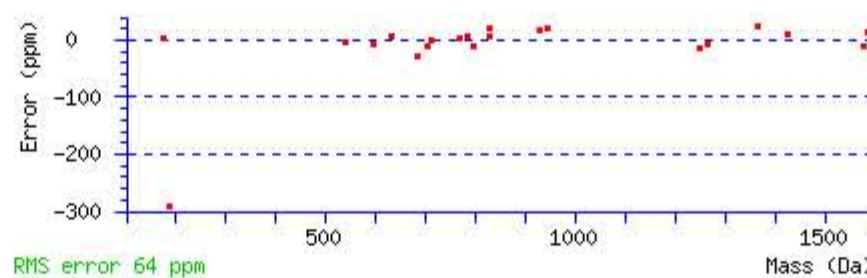

NCBI BLAST search of **IAYGTQGSSGYSLR**

(Parameters: blastp, nr protein database, expect=20000, no filter, PAM30)

Other BLAST [web gateways](#)

All matches to this query

| Score | Mr(calc):   | Delta     | Sequence                         |
|-------|-------------|-----------|----------------------------------|
| 72.5  | 1769.877045 | 0.007723  | <a href="#">IAYGTQGSSGYSLR</a>   |
| 4.2   | 1769.909424 | -0.024656 | <a href="#">LATDAAQVQGATGTR</a>  |
| 1.5   | 1769.880402 | 0.004366  | <a href="#">ALSQTPMPAPEMPKTR</a> |
| 1.5   | 1769.872299 | 0.012469  | <a href="#">LAYSEAGDYLVAIEEK</a> |
| 0.7   | 1769.875717 | 0.009051  | <a href="#">TSGMLTVLEEEAVFTK</a> |
| 0.0   | 1769.884247 | 0.000521  | <a href="#">TELQEVRAQLCNPGR</a>  |

# MASCOT SCIENCE Mascot Search Results

## Peptide View

MS/MS Fragmentation of **VNIPLVTNEECQK**

Found in **KLKB1\_HUMAN**, Plasma kallikrein OS=Homo sapiens GN=KLKB1 PE=1 SV=1

Match to Query 36790: 1853.935782 from(618.985870,3+) rtinseconds(2172) index(20038)

Title: Locus:1.1.1.3322.3 File:"2013-07-02 CLN FXIII 180 min 3rd F 2.wiff"

Data file C:\Program Files (x86)\Matrix Science\Mascot Daemon\mgf\9 FXIII 180 min 3rd\mascot\_daemon\_merge.mgf

Click mouse within plot area to zoom in by factor of two about that point

Or, Plot from  to  Da

Label all possible matches  Label matches used for scoring

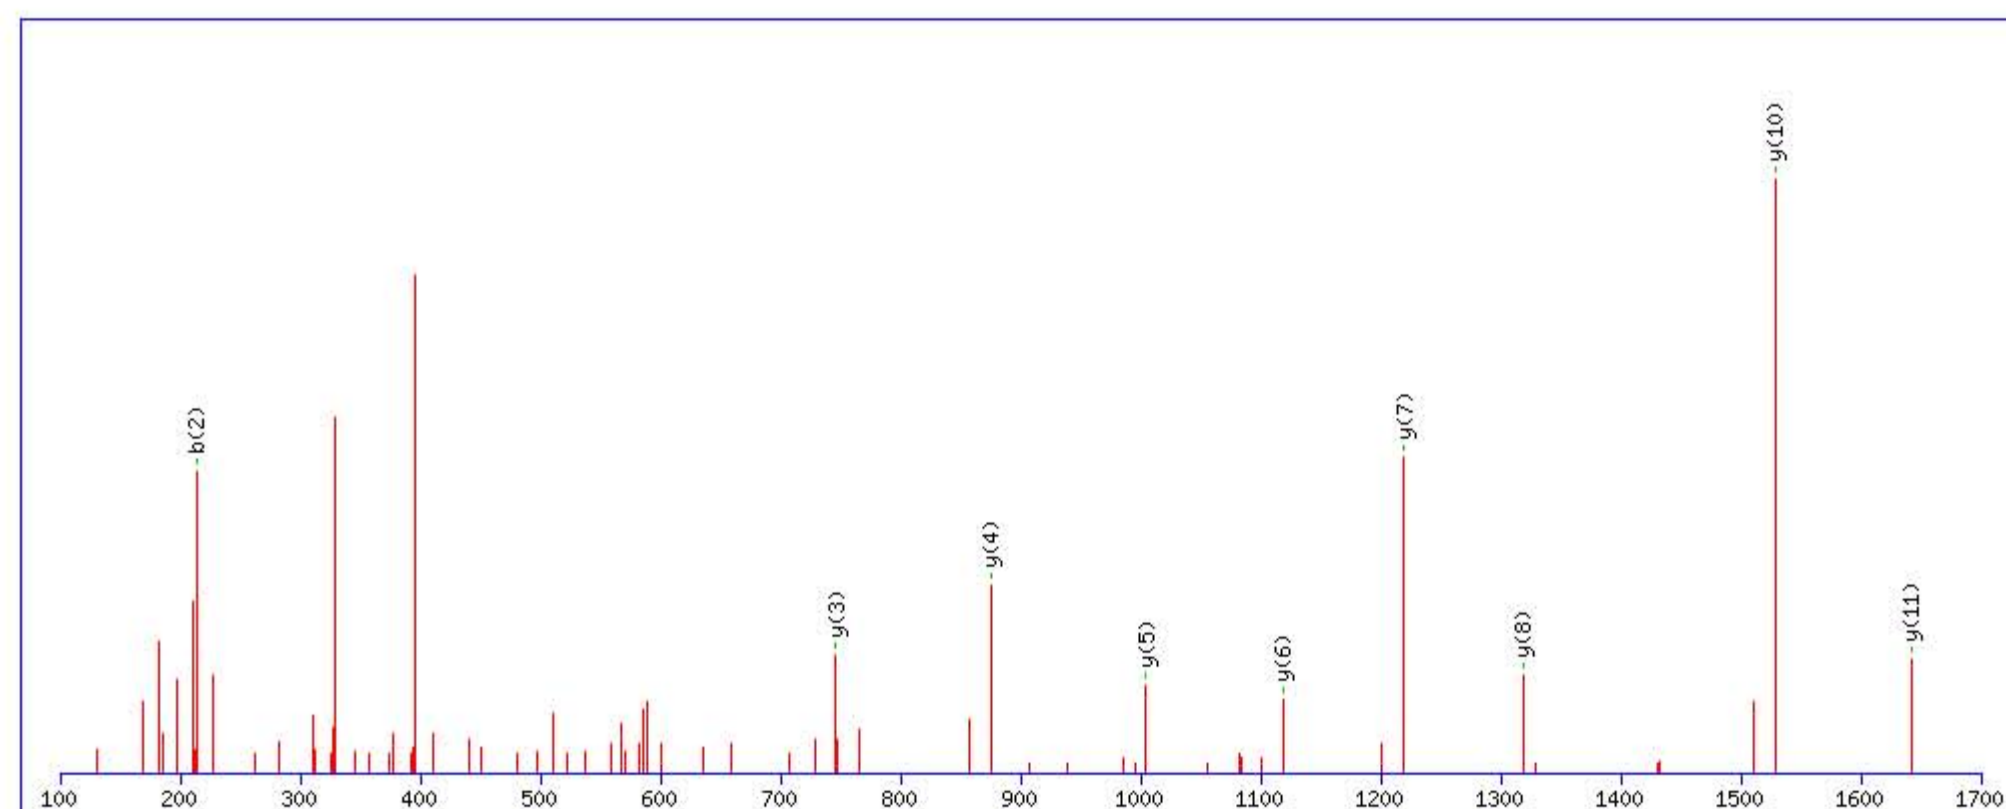

Monoisotopic mass of neutral peptide Mr(calc): 1853.937927

Fixed modifications: Carbamidomethyl (C) (apply to specified residues or termini only)

Variable modifications:

Q12 : Biotin:Thermo-21345 (Q)

Ions Score: 57 Expect: 3.6e-005

Matches : 9/124 fragment ions using 14 most intense peaks [\(help\)](#)

| #  | b                 | b <sup>++</sup> | b <sup>+</sup> | b <sup>+++</sup> | b <sup>0</sup> | b <sup>0++</sup> | Seq. | y                  | y <sup>++</sup> | y <sup>+</sup> | y <sup>+++</sup> | y <sup>0</sup> | y <sup>0++</sup> | #  |
|----|-------------------|-----------------|----------------|------------------|----------------|------------------|------|--------------------|-----------------|----------------|------------------|----------------|------------------|----|
| 1  | 100.075690        | 50.541483       |                |                  |                |                  | V    |                    |                 |                |                  |                |                  | 13 |
| 2  | <b>214.118617</b> | 107.562947      | 197.092068     | 99.049672        |                |                  | N    | 1755.876804        | 878.442040      | 1738.850255    | 869.928766       | 1737.866239    | 869.436758       | 12 |
| 3  | 327.202681        | 164.104978      | 310.176132     | 155.591704       |                |                  | I    | <b>1641.833877</b> | 821.420577      | 1624.807328    | 812.907302       | 1623.823312    | 812.415294       | 11 |
| 4  | 424.255445        | 212.631360      | 407.228896     | 204.118086       |                |                  | P    | <b>1528.749813</b> | 764.878545      | 1511.723264    | 756.365270       | 1510.739248    | 755.873262       | 10 |
| 5  | 537.339509        | 269.173393      | 520.312960     | 260.660118       |                |                  | L    | 1431.697049        | 716.352163      | 1414.670500    | 707.838888       | 1413.686484    | 707.346880       | 9  |
| 6  | 636.407923        | 318.707600      | 619.381374     | 310.194325       |                |                  | V    | <b>1318.612985</b> | 659.810131      | 1301.586436    | 651.296856       | 1300.602420    | 650.804848       | 8  |
| 7  | 737.455602        | 369.231439      | 720.429053     | 360.718165       | 719.445037     | 360.226157       | T    | <b>1219.544571</b> | 610.275924      | 1202.518022    | 601.762649       | 1201.534006    | 601.270641       | 7  |
| 8  | 851.498529        | 426.252903      | 834.471980     | 417.739628       | 833.487964     | 417.247620       | N    | <b>1118.496892</b> | 559.752084      | 1101.470343    | 551.238810       | 1100.486327    | 550.746802       | 6  |
| 9  | 980.541122        | 490.774199      | 963.514573     | 482.260924       | 962.530557     | 481.768916       | E    | <b>1004.453965</b> | 502.730621      | 987.427416     | 494.217346       | 986.443400     | 493.725338       | 5  |
| 10 | 1109.583715       | 555.295496      | 1092.557166    | 546.782221       | 1091.573150    | 546.290213       | E    | <b>875.411372</b>  | 438.209324      | 858.384823     | 429.696050       | 857.400807     | 429.204042       | 4  |
| 11 | 1269.614364       | 635.310820      | 1252.587815    | 626.797546       | 1251.603799    | 626.305538       | C    | <b>746.368779</b>  | 373.688028      | 729.342230     | 365.174753       |                |                  | 3  |
| 12 | 1708.839690       | 854.923483      | 1691.813141    | 846.410209       | 1690.829125    | 845.918201       | Q    | 586.338130         | 293.672703      | 569.311581     | 285.159429       |                |                  | 2  |
| 13 |                   |                 |                |                  |                |                  | K    | 147.112804         | 74.060040       | 130.086255     | 65.546765        |                |                  | 1  |

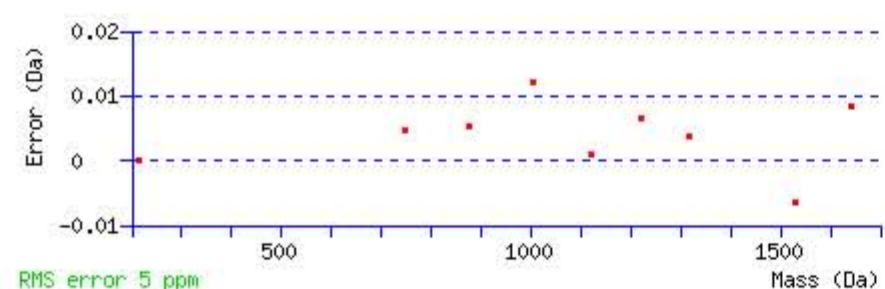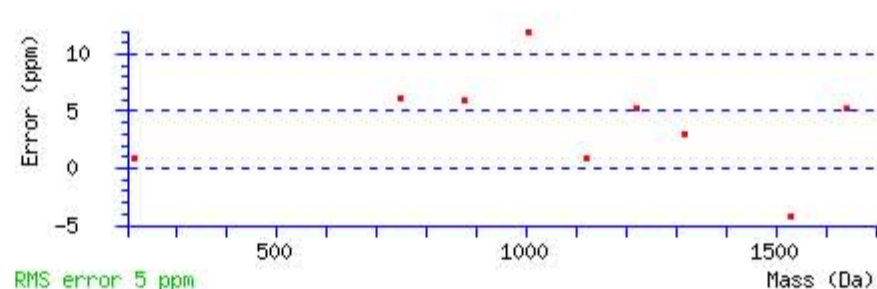

NCBI BLAST search of **VNIPLVTNEECQK**

(Parameters: blastp, nr protein database, expect=20000, no filter, PAM30)

Other BLAST [web gateways](#)

All matches to this query

| Score | Mr(calc):   | Delta     | Sequence                          |
|-------|-------------|-----------|-----------------------------------|
| 56.9  | 1853.937927 | -0.002145 | <a href="#">VNIPLVTNEECQK</a>     |
| 9.0   | 1853.934341 | 0.001441  | <a href="#">RGLSNPNELQAAIDSNR</a> |
| 3.0   | 1853.909424 | 0.026358  | <a href="#">CFNTLTNSFQPSLLGR</a>  |

Mascot: <http://www.matrixscience.com/>

# MASCOT Search Results

## Peptide View

MS/MS Fragmentation of **QCGHQISACHR**

Found in **KLKB1\_HUMAN**, Plasma kallikrein OS=Homo sapiens GN=KLKB1 PE=1 SV=1

Match to Query 38868: 1974.909616 from(494.734680,4+) rtinseconds(1497) index(28805)

Title: Locus:1.1.1.3184.16 File:"2013-07-02 CLN FXIII 180 min 3rd F 3.wiff"

Data file C:\Program Files (x86)\Matrix Science\Mascot Daemon\mgf9 FXIII 180 min 3rd\mascot\_daemon\_merge.mgf

Click mouse within plot area to zoom in by factor of two about that point

Or, Plot from  to  Da

Label all possible matches  Label matches used for scoring

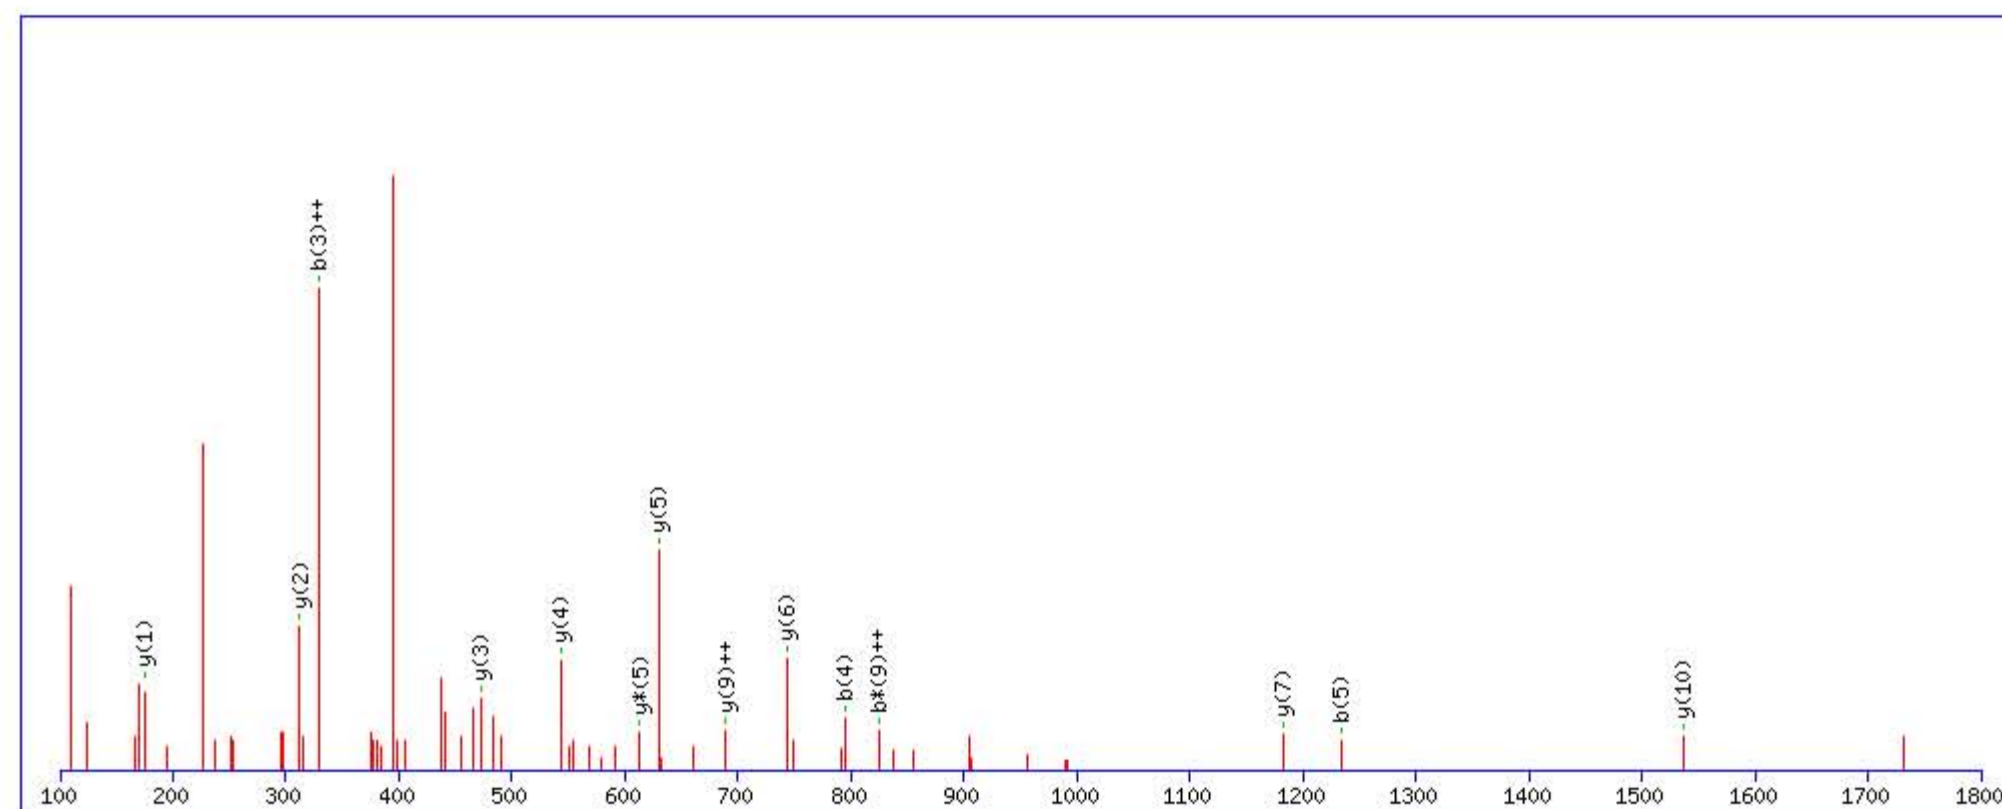

Monoisotopic mass of neutral peptide **Mr(calc): 1974.916122**

Fixed modifications: Carbamidomethyl (C) (apply to specified residues or termini only)

Variable modifications:

Q1 : Biotin:Thermo-21345 (Q)

Q5 : Biotin:Thermo-21345 (Q)

Ions Score: 33 Expect: 0.0057

Matches : 14/100 fragment ions using 31 most intense peaks ([help](#))

| #  | b           | b <sup>++</sup> | b <sup>*</sup> | b <sup>*++</sup> | b <sup>0</sup> | b <sup>0++</sup> | Seq. | y           | y <sup>++</sup> | y <sup>*</sup> | y <sup>*++</sup> | y <sup>0</sup> | y <sup>0++</sup> | #  |
|----|-------------|-----------------|----------------|------------------|----------------|------------------|------|-------------|-----------------|----------------|------------------|----------------|------------------|----|
| 1  | 440.232602  | 220.619939      | 423.206053     | 212.106664       |                |                  | Q    |             |                 |                |                  |                |                  | 11 |
| 2  | 600.263251  | 300.635264      | 583.236702     | 292.121989       |                |                  | C    | 1536.698070 | 768.852673      | 1519.671521    | 760.339399       | 1518.687505    | 759.847391       | 10 |
| 3  | 657.284715  | 329.145996      | 640.258166     | 320.632721       |                |                  | G    | 1376.667421 | 688.837349      | 1359.640872    | 680.324074       | 1358.656856    | 679.832066       | 9  |
| 4  | 794.343627  | 397.675452      | 777.317078     | 389.162177       |                |                  | H    | 1319.645957 | 660.326617      | 1302.619408    | 651.813342       | 1301.635392    | 651.321334       | 8  |
| 5  | 1233.568953 | 617.288115      | 1216.542404    | 608.774840       |                |                  | Q    | 1182.587045 | 591.797161      | 1165.560496    | 583.283886       | 1164.576480    | 582.791878       | 7  |
| 6  | 1346.653017 | 673.830147      | 1329.626468    | 665.316872       |                |                  | I    | 743.361719  | 372.184498      | 726.335170     | 363.671223       | 725.351154     | 363.179215       | 6  |
| 7  | 1433.685045 | 717.346161      | 1416.658496    | 708.832886       | 1415.674480    | 708.340878       | S    | 630.277655  | 315.642466      | 613.251106     | 307.129191       | 612.267090     | 306.637183       | 5  |
| 8  | 1504.722159 | 752.864718      | 1487.695610    | 744.351443       | 1486.711594    | 743.859435       | A    | 543.245627  | 272.126452      | 526.219078     | 263.613177       |                |                  | 4  |
| 9  | 1664.752808 | 832.880042      | 1647.726259    | 824.366768       | 1646.742243    | 823.874760       | C    | 472.208513  | 236.607894      | 455.181964     | 228.094620       |                |                  | 3  |
| 10 | 1801.811720 | 901.409498      | 1784.785171    | 892.896224       | 1783.801155    | 892.404216       | H    | 312.177864  | 156.592570      | 295.151315     | 148.079295       |                |                  | 2  |
| 11 |             |                 |                |                  |                |                  | R    | 175.118952  | 88.063114       | 158.092403     | 79.549839        |                |                  | 1  |

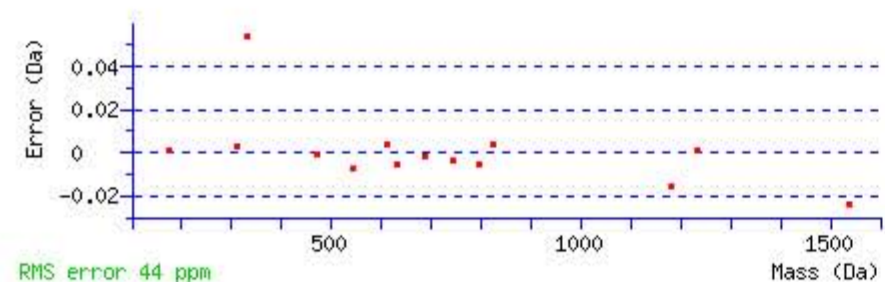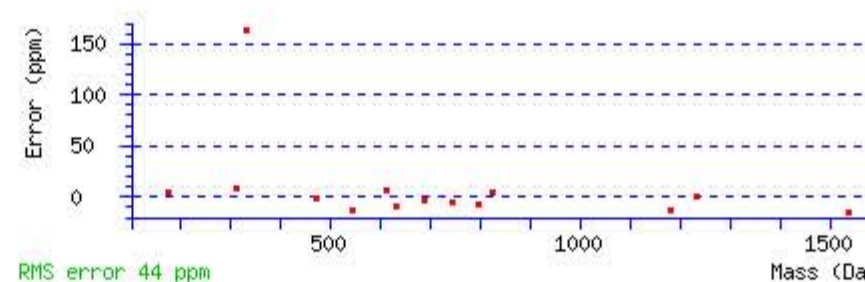

NCBI BLAST search of **QCGHQISACHR**

(Parameters: blastp, nr protein database, expect=20000, no filter, PAM30)

Other BLAST [web gateways](#)

All matches to this query

| Score | Mr(calc):   | Delta     | Sequence                    |
|-------|-------------|-----------|-----------------------------|
| 33.4  | 1974.916122 | -0.006506 | <a href="#">QCGHQISACHR</a> |

Mascot: <http://www.matrixscience.com/>



# MASCOT Search Results

## Peptide View

MS/MS Fragmentation of **GGDVASMYTPNAQYCQMR**

Found in **KLKB1\_HUMAN**, Plasma kallikrein OS=Homo sapiens GN=KLKB1 PE=1 SV=1

Match to Query 45932: 2359.021602 from(787.347810,3+) rtinseconds(2076) index(32325)

Title: Locus:1.1.1.3386.19 File:"2013-07-02 CLN FXIII 180 min 3rd F 3.wiff"

Data file C:\Program Files (x86)\Matrix Science\Mascot Daemon\mgf\9 FXIII 180 min 3rd\mascot\_daemon\_merge.mgf

Click mouse within plot area to zoom in by factor of two about that point

Or, Plot from  to  Da

Label all possible matches  Label matches used for scoring

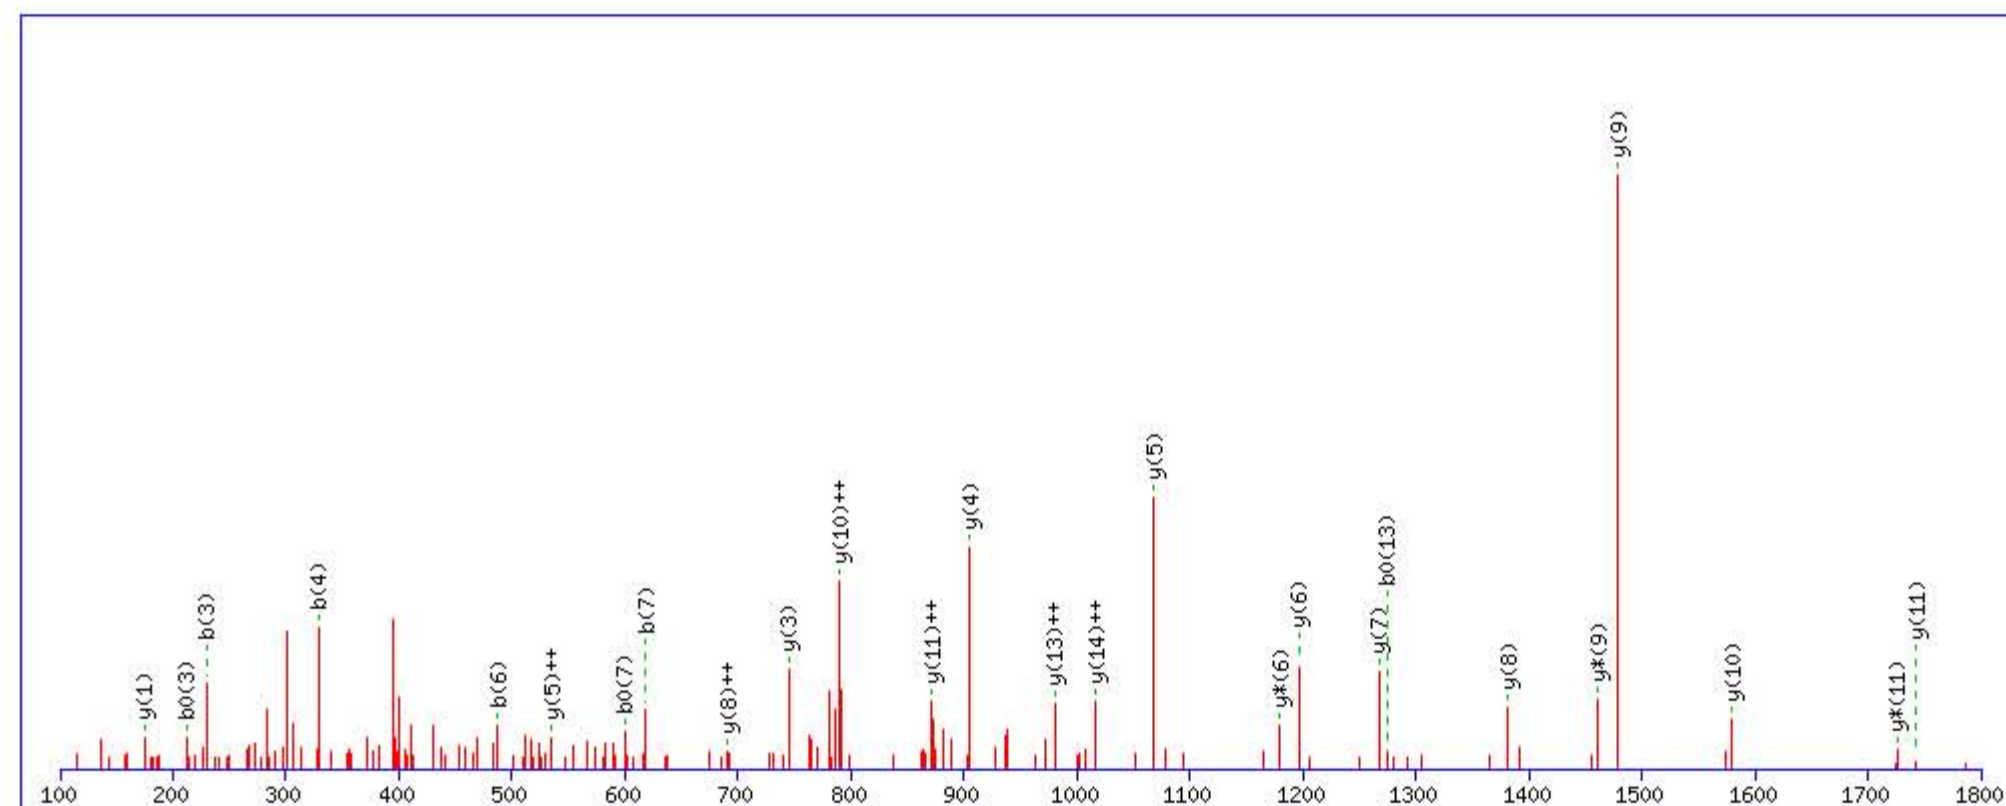

Monoisotopic mass of neutral peptide Mr(calc): 2359.021759

Fixed modifications: Carbamidomethyl (C) (apply to specified residues or termini only)

Variable modifications:

Q16 : Biotin:Thermo-21345 (Q)

Ions Score: 76 Expect: 1.1e-007

Matches : 26/162 fragment ions using 32 most intense peaks [\(help\)](#)

| #  | b                 | b <sup>++</sup> | b <sup>+</sup> | b <sup>+++</sup> | b <sup>0</sup>     | b <sup>0++</sup> | Seq. | y                  | y <sup>++</sup>    | y <sup>+</sup>     | y <sup>+++</sup> | y <sup>0</sup> | y <sup>0++</sup> | #  |
|----|-------------------|-----------------|----------------|------------------|--------------------|------------------|------|--------------------|--------------------|--------------------|------------------|----------------|------------------|----|
| 1  | 58.028740         | 29.518008       |                |                  |                    |                  | G    |                    |                    |                    |                  |                |                  | 18 |
| 2  | 115.050204        | 58.028740       |                |                  |                    |                  | G    | 2303.007580        | 1152.007428        | 2285.981031        | 1143.494153      | 2284.997015    | 1143.002145      | 17 |
| 3  | <b>230.077147</b> | 115.542211      |                |                  | <b>212.066582</b>  | 106.536929       | D    | 2245.986116        | 1123.496696        | 2228.959567        | 1114.983421      | 2227.975551    | 1114.491413      | 16 |
| 4  | <b>329.145561</b> | 165.076418      |                |                  | 311.134996         | 156.071136       | V    | 2130.959173        | 1065.983224        | 2113.932624        | 1057.469950      | 2112.948608    | 1056.977942      | 15 |
| 5  | 400.182675        | 200.594975      |                |                  | 382.172110         | 191.589693       | A    | 2031.890759        | <b>1016.449018</b> | 2014.864210        | 1007.935743      | 2013.880194    | 1007.443735      | 14 |
| 6  | <b>487.214703</b> | 244.110989      |                |                  | 469.204138         | 235.105707       | S    | 1960.853645        | <b>980.930461</b>  | 1943.827096        | 972.417186       | 1942.843080    | 971.925178       | 13 |
| 7  | <b>618.255188</b> | 309.631232      |                |                  | <b>600.244623</b>  | 300.625949       | M    | 1873.821617        | 937.414447         | 1856.795068        | 928.901172       | 1855.811052    | 928.409164       | 12 |
| 8  | 781.318517        | 391.162896      |                |                  | 763.307952         | 382.157614       | Y    | <b>1742.781132</b> | <b>871.894204</b>  | <b>1725.754583</b> | 863.380930       | 1724.770567    | 862.888922       | 11 |
| 9  | 882.366196        | 441.686736      |                |                  | 864.355631         | 432.681453       | T    | <b>1579.717803</b> | <b>790.362540</b>  | 1562.691254        | 781.849265       | 1561.707238    | 781.357257       | 10 |
| 10 | 979.418960        | 490.213118      |                |                  | 961.408395         | 481.207835       | P    | <b>1478.670124</b> | 739.838700         | <b>1461.643575</b> | 731.325426       |                |                  | 9  |
| 11 | 1093.461887       | 547.234581      | 1076.435338    | 538.721307       | 1075.451322        | 538.229299       | N    | <b>1381.617360</b> | <b>691.312318</b>  | 1364.590811        | 682.799044       |                |                  | 8  |
| 12 | 1164.499001       | 582.753138      | 1147.472452    | 574.239864       | 1146.488436        | 573.747856       | A    | <b>1267.574433</b> | 634.290855         | 1250.547884        | 625.777580       |                |                  | 7  |
| 13 | 1292.557579       | 646.782428      | 1275.531030    | 638.269153       | <b>1274.547014</b> | 637.777145       | Q    | <b>1196.537319</b> | 598.772298         | <b>1179.510770</b> | 590.259023       |                |                  | 6  |
| 14 | 1455.620908       | 728.314092      | 1438.594359    | 719.800818       | 1437.610343        | 719.308810       | Y    | <b>1068.478741</b> | <b>534.743009</b>  | 1051.452192        | 526.229734       |                |                  | 5  |
| 15 | 1615.651557       | 808.329417      | 1598.625008    | 799.816142       | 1597.640992        | 799.324134       | C    | <b>905.415412</b>  | 453.211344         | 888.388863         | 444.698070       |                |                  | 4  |
| 16 | 2054.876883       | 1027.942079     | 2037.850334    | 1019.428805      | 2036.866318        | 1018.936797      | Q    | <b>745.384763</b>  | 373.196020         | 728.358214         | 364.682745       |                |                  | 3  |
| 17 | 2185.917368       | 1093.462322     | 2168.890819    | 1084.949047      | 2167.906803        | 1084.457039      | M    | 306.159437         | 153.583356         | 289.132888         | 145.070082       |                |                  | 2  |
| 18 |                   |                 |                |                  |                    |                  | R    | <b>175.118952</b>  | 88.063114          | 158.092403         | 79.549839        |                |                  | 1  |

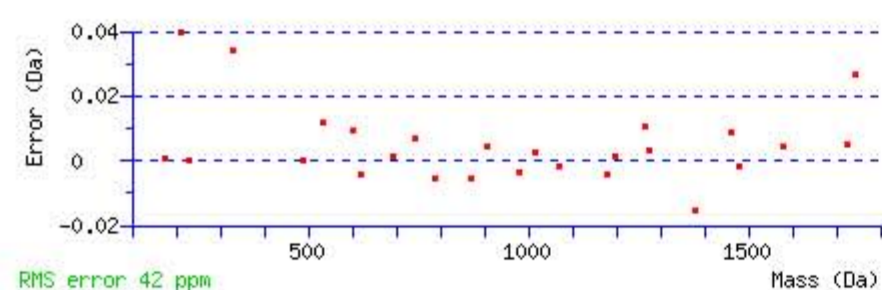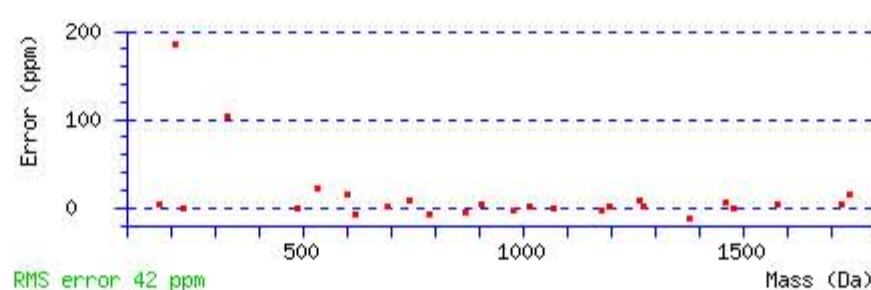

NCBI BLAST search of **GGDVASMYTPNAQYCQMR**

(Parameters: blastp, nr protein database, expect=20000, no filter, PAM30)

Other BLAST [web gateways](#)

All matches to this query

| Score | Mr(calc):   | Delta     | Sequence                           |
|-------|-------------|-----------|------------------------------------|
| 76.3  | 2359.021759 | -0.000157 | <a href="#">GGDVASMYTPNAQYCQMR</a> |
| 44.2  | 2359.021759 | -0.000157 | <a href="#">GGDVASMYTPNAQYCQMR</a> |

# MASCOT Search Results

## Peptide View

MS/MS Fragmentation of **DFTCVHQALK**

Found in **IC1\_HUMAN**, Plasma protease C1 inhibitor OS=Homo sapiens GN=SERPING1 PE=1 SV=2

Match to Query 28044: 1528.749188 from(765.381870,2+) rtinseconds(1830) index(30780)

Title: Locus:1.1.1.3300.11 File:"2013-07-02 CLN FXIII 180 min 3rd F 3.wiff"

Data file C:\Program Files (x86)\Matrix Science\Mascot Daemon\mgf\9 FXIII 180 min 3rd\mascot\_daemon\_merge.mgf

Click mouse within plot area to zoom in by factor of two about that point

Or, Plot from  to  Da

Label all possible matches  Label matches used for scoring

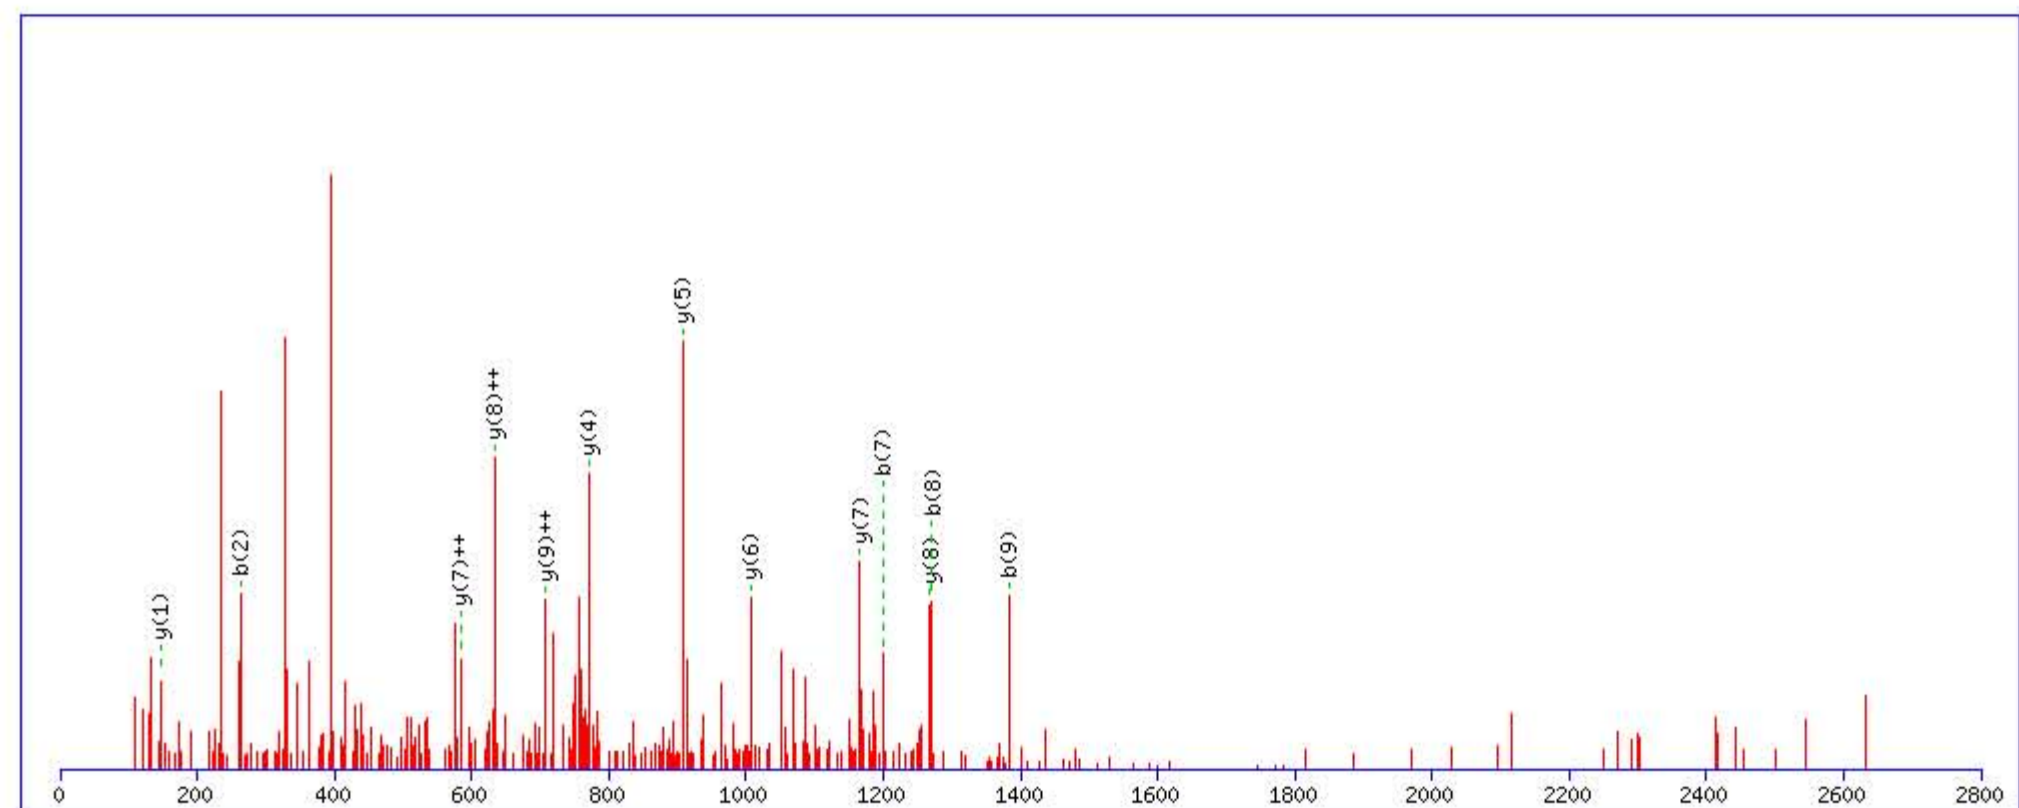

Monoisotopic mass of neutral peptide  $M_r(\text{calc})$ : 1528.753052

Fixed modifications: Carbamidomethyl (C) (apply to specified residues or termini only)

Variable modifications:

Q7 : Biotin:Thermo-21345 (Q)

Ions Score: 28 Expect: 0.0037

Matches : 13/82 fragment ions using 30 most intense peaks [\(help\)](#)

| #  | b                  | b <sup>++</sup> | b <sup>*</sup> | b <sup>*++</sup> | b <sup>0</sup> | b <sup>0++</sup> | Seq. | y                  | y <sup>++</sup>   | y <sup>*</sup> | y <sup>*++</sup> | y <sup>0</sup> | y <sup>0++</sup> | #  |
|----|--------------------|-----------------|----------------|------------------|----------------|------------------|------|--------------------|-------------------|----------------|------------------|----------------|------------------|----|
| 1  | 116.034219         | 58.520748       |                |                  | 98.023654      | 49.515465        | D    |                    |                   |                |                  |                |                  | 10 |
| 2  | <b>263.102633</b>  | 132.054954      |                |                  | 245.092068     | 123.049672       | F    | 1414.733376        | <b>707.870326</b> | 1397.706827    | 699.357051       | 1396.722811    | 698.865043       | 9  |
| 3  | 364.150312         | 182.578794      |                |                  | 346.139747     | 173.573512       | T    | <b>1267.664962</b> | <b>634.336119</b> | 1250.638413    | 625.822844       | 1249.654397    | 625.330836       | 8  |
| 4  | 524.180961         | 262.594119      |                |                  | 506.170396     | 253.588836       | C    | <b>1166.617283</b> | <b>583.812279</b> | 1149.590734    | 575.299005       |                |                  | 7  |
| 5  | 623.249375         | 312.128326      |                |                  | 605.238810     | 303.123043       | V    | <b>1006.586634</b> | 503.796955        | 989.560085     | 495.283680       |                |                  | 6  |
| 6  | 760.308287         | 380.657782      |                |                  | 742.297722     | 371.652499       | H    | <b>907.518220</b>  | 454.262748        | 890.491671     | 445.749473       |                |                  | 5  |
| 7  | <b>1199.533613</b> | 600.270444      | 1182.507064    | 591.757170       | 1181.523048    | 591.265162       | Q    | <b>770.459308</b>  | 385.733292        | 753.432759     | 377.220017       |                |                  | 4  |
| 8  | <b>1270.570727</b> | 635.789001      | 1253.544178    | 627.275727       | 1252.560162    | 626.783719       | A    | 331.233982         | 166.120629        | 314.207433     | 157.607354       |                |                  | 3  |
| 9  | <b>1383.654791</b> | 692.331033      | 1366.628242    | 683.817759       | 1365.644226    | 683.325751       | L    | 260.196868         | 130.602072        | 243.170319     | 122.088797       |                |                  | 2  |
| 10 |                    |                 |                |                  |                |                  | K    | <b>147.112804</b>  | 74.060040         | 130.086255     | 65.546765        |                |                  | 1  |

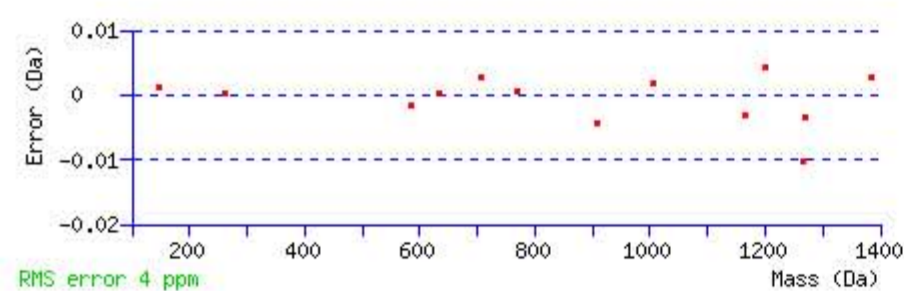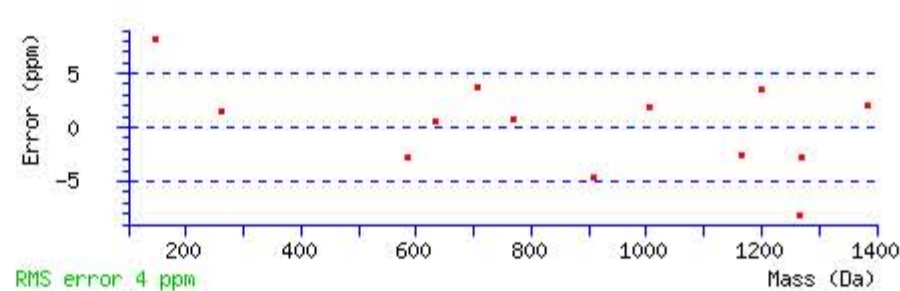

NCBI BLAST search of [DFTCVHQALK](#)

(Parameters: blastp, nr protein database, expect=20000, no filter, PAM30)

Other BLAST [web gateways](#)

## All matches to this query

| Score | $M_r(\text{calc})$ : | Delta     | Sequence                        |
|-------|----------------------|-----------|---------------------------------|
| 28.4  | 1528.753052          | -0.003864 | <a href="#">DFTCVHQALK</a>      |
| 2.5   | 1528.740936          | 0.008252  | <a href="#">VYESIGQYGGGETVK</a> |

# MATRIX SCIENCE Mascot Search Results

## Peptide View

MS/MS Fragmentation of **VTTSQDMLSIMEK**

Found in **IC1\_HUMAN**, Plasma protease C1 inhibitor OS=Homo sapiens GN=SERPING1 PE=1 SV=2

Match to Query 35568: 1792.871568 from(897.443060,2+) rtinseconds(2389) index(34021)

Title: Locus:1.1.1.3495.15 File:"2013-07-02 CLN FXIII 180 min 3rd F 3.wiff"

Data file C:\Program Files (x86)\Matrix Science\Mascot Daemon\mgf\9 FXIII 180 min 3rd\mascot\_daemon\_merge.mgf

Click mouse within plot area to zoom in by factor of two about that point

Or, Plot from  to  Da

Label all possible matches  Label matches used for scoring

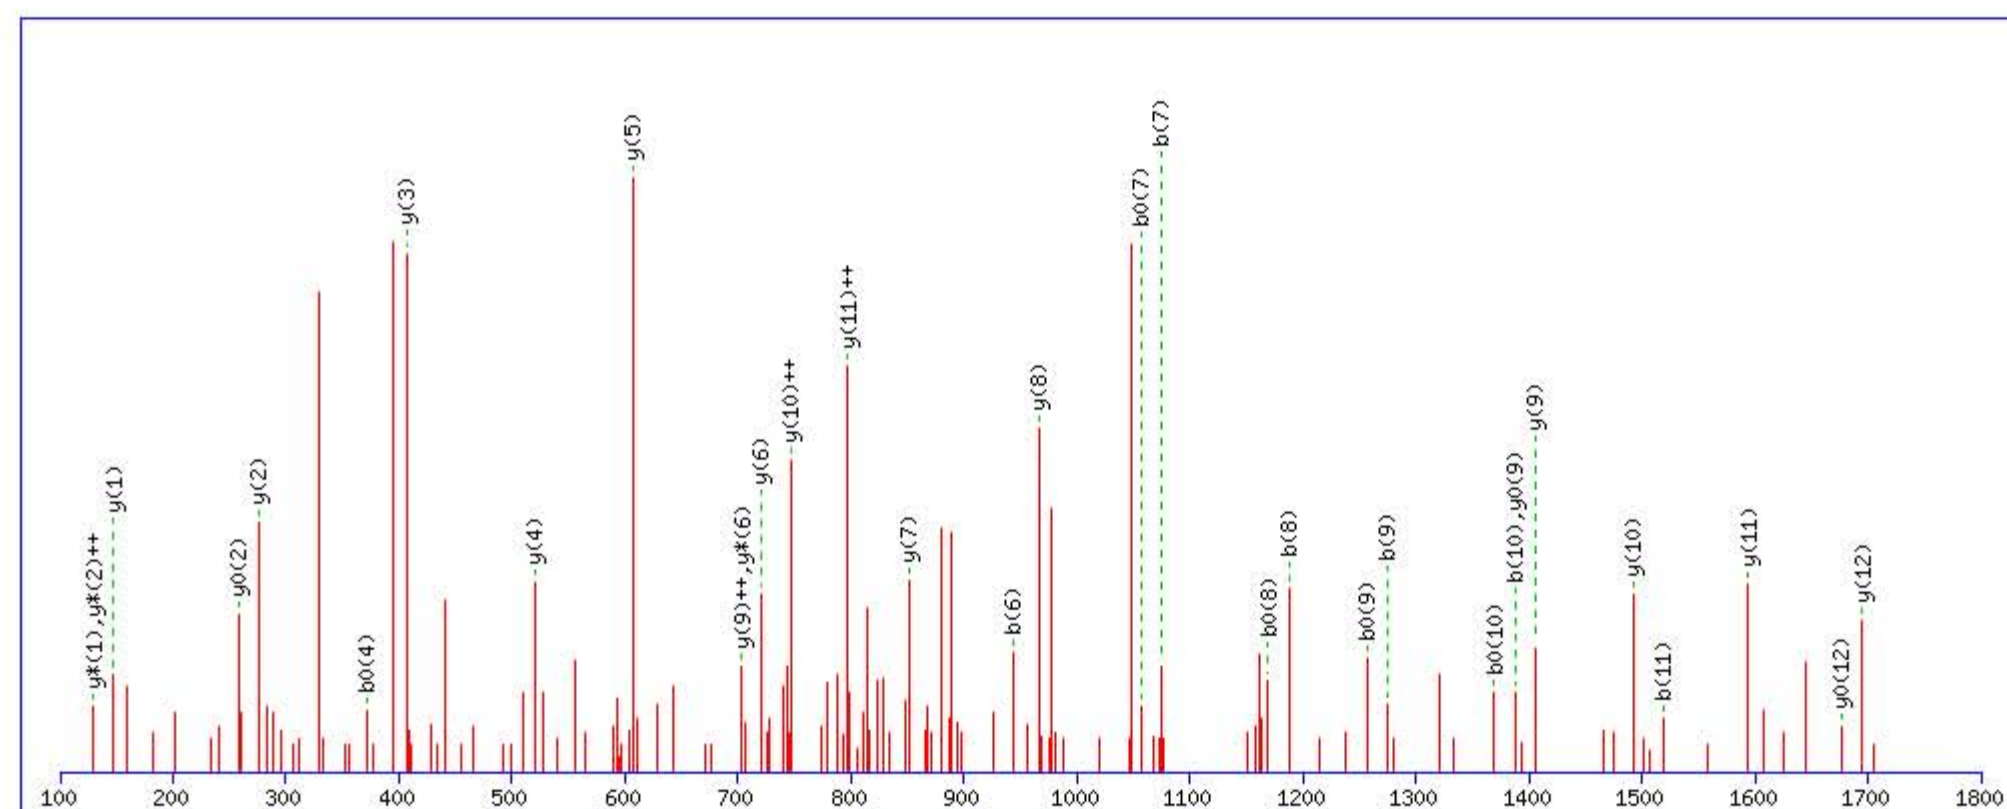

Monoisotopic mass of neutral peptide Mr(calc): 1792.877304

Fixed modifications: Carbamidomethyl (C) (apply to specified residues or termini only)

Variable modifications:

Q5 : Biotin:Thermo-21345 (Q)

Ions Score: 86 Expect: 5e-008

Matches : 32/132 fragment ions using 48 most intense peaks [\(help\)](#)

| #  | b           | b <sup>++</sup> | b <sup>*</sup> | b <sup>*++</sup> | b <sup>0</sup> | b <sup>0++</sup> | Seq. | y           | y <sup>++</sup> | y <sup>*</sup> | y <sup>*++</sup> | y <sup>0</sup> | y <sup>0++</sup> | #  |
|----|-------------|-----------------|----------------|------------------|----------------|------------------|------|-------------|-----------------|----------------|------------------|----------------|------------------|----|
| 1  | 100.075690  | 50.541483       |                |                  |                |                  | V    |             |                 |                |                  |                |                  | 13 |
| 2  | 201.123369  | 101.065322      |                |                  | 183.112804     | 92.060040        | T    | 1694.816178 | 847.911727      | 1677.789629    | 839.398453       | 1676.805613    | 838.906445       | 12 |
| 3  | 302.171048  | 151.589162      |                |                  | 284.160483     | 142.583879       | T    | 1593.768499 | 797.387888      | 1576.741950    | 788.874613       | 1575.757934    | 788.382605       | 11 |
| 4  | 389.203076  | 195.105176      |                |                  | 371.192511     | 186.099893       | S    | 1492.720820 | 746.864048      | 1475.694271    | 738.350774       | 1474.710255    | 737.858766       | 10 |
| 5  | 828.428402  | 414.717839      | 811.401853     | 406.204565       | 810.417837     | 405.712557       | Q    | 1405.688792 | 703.348034      | 1388.662243    | 694.834760       | 1387.678227    | 694.342752       | 9  |
| 6  | 943.455345  | 472.231311      | 926.428796     | 463.718036       | 925.444780     | 463.226028       | D    | 966.463466  | 483.735371      | 949.436917     | 475.222097       | 948.452901     | 474.730089       | 8  |
| 7  | 1074.495830 | 537.751553      | 1057.469281    | 529.238279       | 1056.485265    | 528.746271       | M    | 851.436523  | 426.221900      | 834.409974     | 417.708625       | 833.425958     | 417.216617       | 7  |
| 8  | 1187.579894 | 594.293585      | 1170.553345    | 585.780311       | 1169.569329    | 585.288302       | L    | 720.396038  | 360.701657      | 703.369489     | 352.188383       | 702.385473     | 351.696375       | 6  |
| 9  | 1274.611922 | 637.809599      | 1257.585373    | 629.296325       | 1256.601357    | 628.804317       | S    | 607.311974  | 304.159625      | 590.285425     | 295.646351       | 589.301409     | 295.154343       | 5  |
| 10 | 1387.695986 | 694.351631      | 1370.669437    | 685.838357       | 1369.685421    | 685.346348       | I    | 520.279946  | 260.643611      | 503.253397     | 252.130337       | 502.269381     | 251.638329       | 4  |
| 11 | 1518.736471 | 759.871873      | 1501.709922    | 751.358599       | 1500.725906    | 750.866591       | M    | 407.195882  | 204.101579      | 390.169333     | 195.588305       | 389.185317     | 195.096297       | 3  |
| 12 | 1647.779064 | 824.393170      | 1630.752515    | 815.879896       | 1629.768499    | 815.387888       | E    | 276.155397  | 138.581337      | 259.128848     | 130.068062       | 258.144832     | 129.576054       | 2  |
| 13 |             |                 |                |                  |                |                  | K    | 147.112804  | 74.060040       | 130.086255     | 65.546765        |                |                  | 1  |

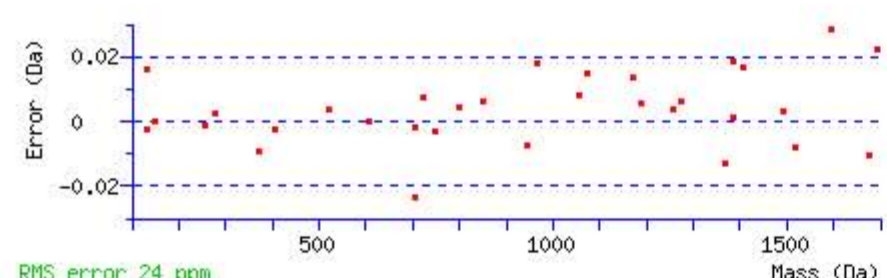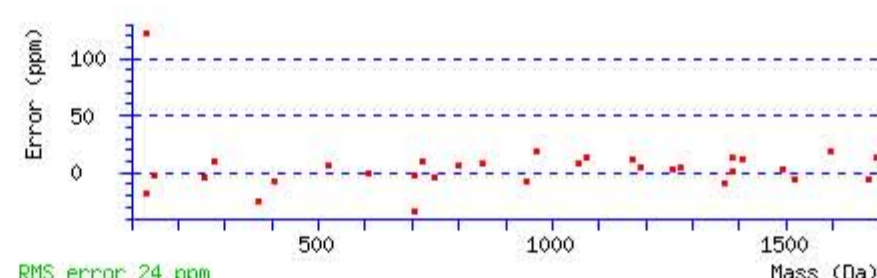

NCBI BLAST search of **VTTSQDMLSIMEK**

(Parameters: blastp, nr protein database, expect=20000, no filter, PAM30)

Other BLAST [web gateways](#)

All matches to this query

| Score | Mr(calc):   | Delta     | Sequence                      |
|-------|-------------|-----------|-------------------------------|
| 86.5  | 1792.877304 | -0.005736 | <a href="#">VTTSQDMLSIMEK</a> |

Mascot: <http://www.matrixscience.com/>

# MATRIX SCIENCE Mascot Search Results

## Peptide View

MS/MS Fragmentation of **KYPVAHFIDQTLK**

Found in **IC1\_HUMAN**, Plasma protease C1 inhibitor OS=Homo sapiens GN=SERPING1 PE=1 SV=2

Match to Query 37033: 1870.009872 from(624.343900,3+) rtinseconds(2035) index(32090)

Title: Locus:1.1.1.3372.5 File:"2013-07-02 CLN FXIII 180 min 3rd F 3.wiff"

Data file C:\Program Files (x86)\Matrix Science\Mascot Daemon\mgf\9 FXIII 180 min 3rd\mascot\_daemon\_merge.mgf

Click mouse within plot area to zoom in by factor of two about that point

Or, Plot from  to  Da

Label all possible matches  Label matches used for scoring

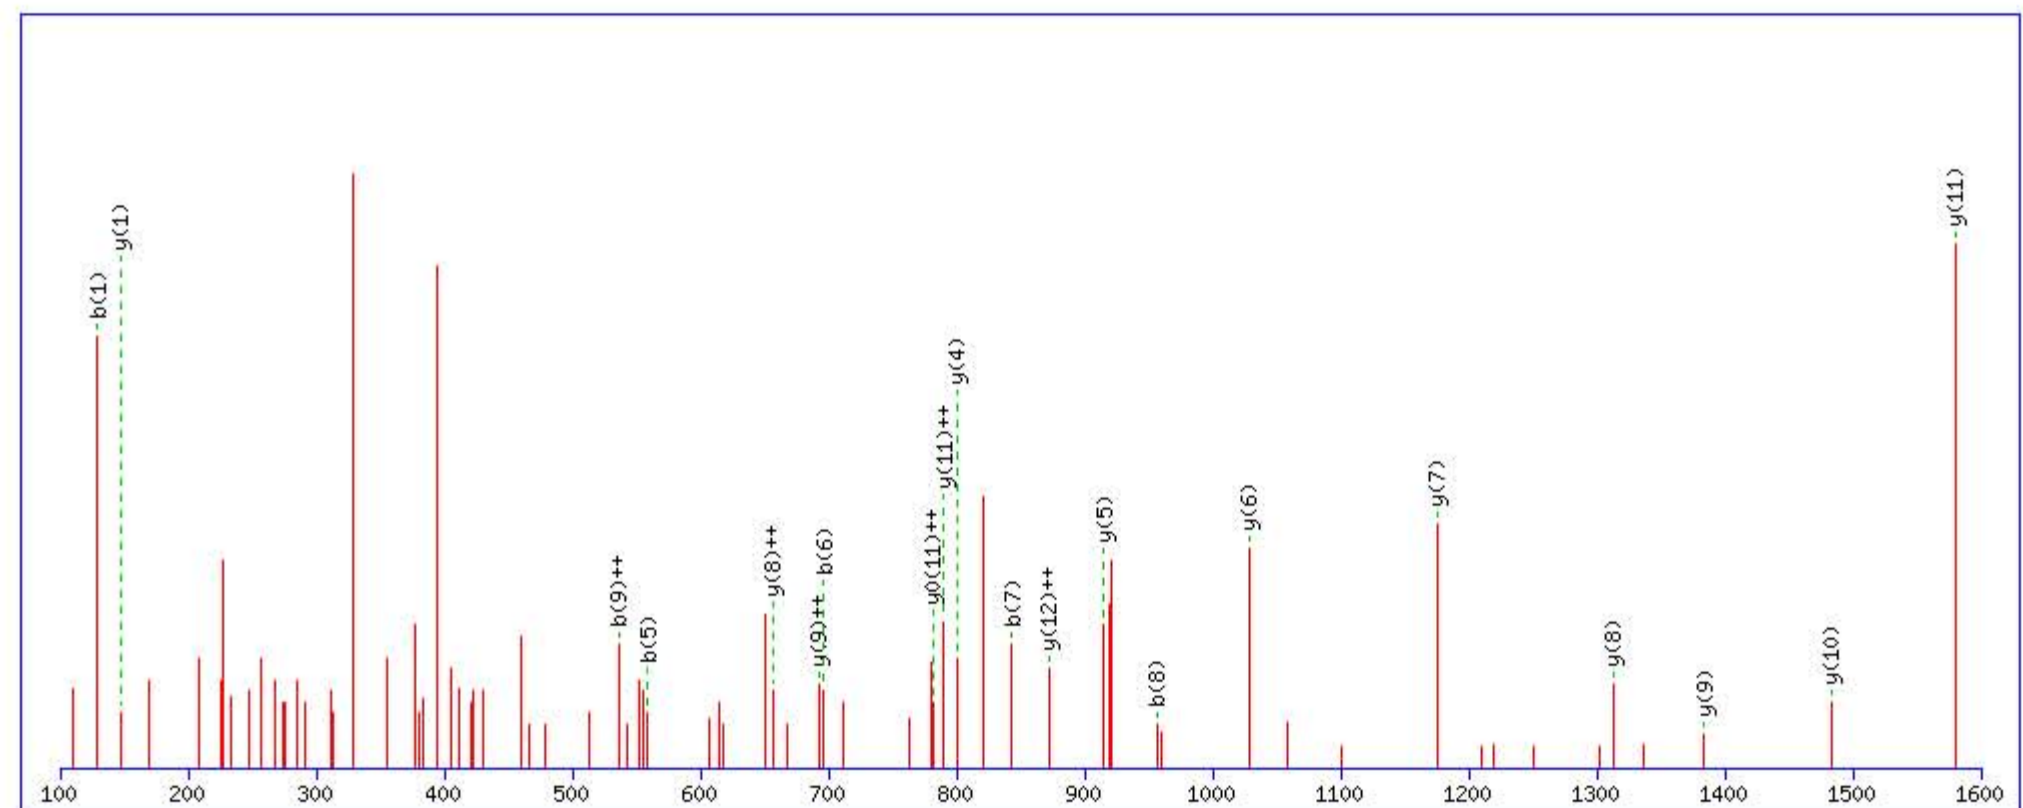

Monoisotopic mass of neutral peptide Mr(calc): 1870.017502

Fixed modifications: Carbamidomethyl (C) (apply to specified residues or termini only)

Variable modifications:

Q10 : Biotin:Thermo-21345 (Q)

Ions Score: 30 Expect: 0.024

Matches : 20/124 fragment ions using 58 most intense peaks [\(help\)](#)

| #  | b                 | b <sup>++</sup>   | b <sup>*</sup> | b <sup>*++</sup> | b <sup>0</sup> | b <sup>0++</sup> | Seq.     | y                  | y <sup>++</sup>   | y <sup>*</sup> | y <sup>*++</sup> | y <sup>0</sup> | y <sup>0++</sup>  | #         |
|----|-------------------|-------------------|----------------|------------------|----------------|------------------|----------|--------------------|-------------------|----------------|------------------|----------------|-------------------|-----------|
| 1  | <b>129.102239</b> | 65.054757         | 112.075690     | 56.541483        |                |                  | <b>K</b> |                    |                   |                |                  |                |                   | <b>13</b> |
| 2  | 292.165568        | 146.586422        | 275.139019     | 138.073148       |                |                  | <b>Y</b> | 1742.929827        | <b>871.968552</b> | 1725.903278    | 863.455277       | 1724.919262    | 862.963269        | <b>12</b> |
| 3  | 389.218332        | 195.112804        | 372.191783     | 186.599529       |                |                  | <b>P</b> | <b>1579.866498</b> | <b>790.436887</b> | 1562.839949    | 781.923613       | 1561.855933    | <b>781.431605</b> | <b>11</b> |
| 4  | 488.286746        | 244.647011        | 471.260197     | 236.133737       |                |                  | <b>V</b> | <b>1482.813734</b> | 741.910505        | 1465.787185    | 733.397231       | 1464.803169    | 732.905223        | <b>10</b> |
| 5  | <b>559.323860</b> | 280.165568        | 542.297311     | 271.652294       |                |                  | <b>A</b> | <b>1383.745320</b> | <b>692.376298</b> | 1366.718771    | 683.863024       | 1365.734755    | 683.371016        | <b>9</b>  |
| 6  | <b>696.382772</b> | 348.695024        | 679.356223     | 340.181750       |                |                  | <b>H</b> | <b>1312.708206</b> | <b>656.857741</b> | 1295.681657    | 648.344467       | 1294.697641    | 647.852459        | <b>8</b>  |
| 7  | <b>843.451186</b> | 422.229231        | 826.424637     | 413.715957       |                |                  | <b>F</b> | <b>1175.649294</b> | 588.328285        | 1158.622745    | 579.815011       | 1157.638729    | 579.323003        | <b>7</b>  |
| 8  | <b>956.535250</b> | 478.771263        | 939.508701     | 470.257989       |                |                  | <b>I</b> | <b>1028.580880</b> | 514.794078        | 1011.554331    | 506.280804       | 1010.570315    | 505.788796        | <b>6</b>  |
| 9  | 1071.562193       | <b>536.284735</b> | 1054.535644    | 527.771460       | 1053.551628    | 527.279452       | <b>D</b> | <b>915.496816</b>  | 458.252046        | 898.470267     | 449.738772       | 897.486251     | 449.246764        | <b>5</b>  |
| 10 | 1510.787519       | 755.897398        | 1493.760970    | 747.384123       | 1492.776954    | 746.892115       | <b>Q</b> | <b>800.469873</b>  | 400.738575        | 783.443324     | 392.225300       | 782.459308     | 391.733292        | <b>4</b>  |
| 11 | 1611.835198       | 806.421237        | 1594.808649    | 797.907963       | 1593.824633    | 797.415955       | <b>T</b> | 361.244547         | 181.125911        | 344.217998     | 172.612637       | 343.233982     | 172.120629        | <b>3</b>  |
| 12 | 1724.919262       | 862.963269        | 1707.892713    | 854.449995       | 1706.908697    | 853.957987       | <b>L</b> | 260.196868         | 130.602072        | 243.170319     | 122.088797       |                |                   | <b>2</b>  |
| 13 |                   |                   |                |                  |                |                  | <b>K</b> | <b>147.112804</b>  | 74.060040         | 130.086255     | 65.546765        |                |                   | <b>1</b>  |

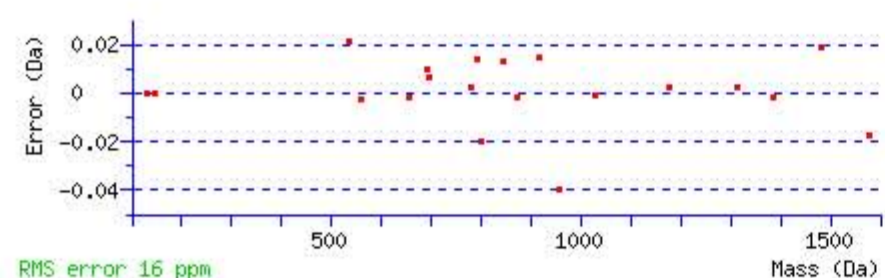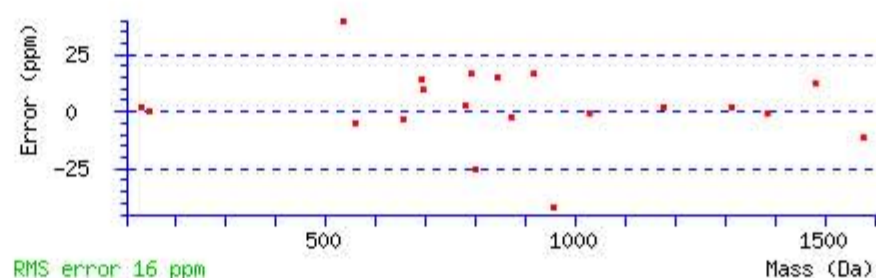

NCBI BLAST search of **KYPVAHFIDQTLK**

(Parameters: blastp, nr protein database, expect=20000, no filter, PAM30)

Other BLAST [web gateways](#)

## All matches to this query

| Score | Mr(calc):   | Delta     | Sequence                      |
|-------|-------------|-----------|-------------------------------|
| 29.6  | 1870.017502 | -0.007630 | <a href="#">KYPVAHFIDQTLK</a> |

Mascot: <http://www.matrixscience.com/>

# MASCOT SEARCH RESULTS

## Peptide View

MS/MS Fragmentation of **LEDMEQALSPSVFK**

Found in **IC1\_HUMAN**, Plasma protease C1 inhibitor OS=Homo sapiens GN=SERPING1 PE=1 SV=2

Match to Query 37455: 1903.938102 from(635.653310,3+) rtinseconds(2448) index(34301)

Title: Locus:1.1.1.3516.4 File:"2013-07-02 CLN FXIII 180 min 3rd F 3.wiff"

Data file C:\Program Files (x86)\Matrix Science\Mascot Daemon\mgf\9 FXIII 180 min 3rd\mascot\_daemon\_merge.mgf

Click mouse within plot area to zoom in by factor of two about that point

Or, Plot from  to  Da

Label all possible matches  Label matches used for scoring

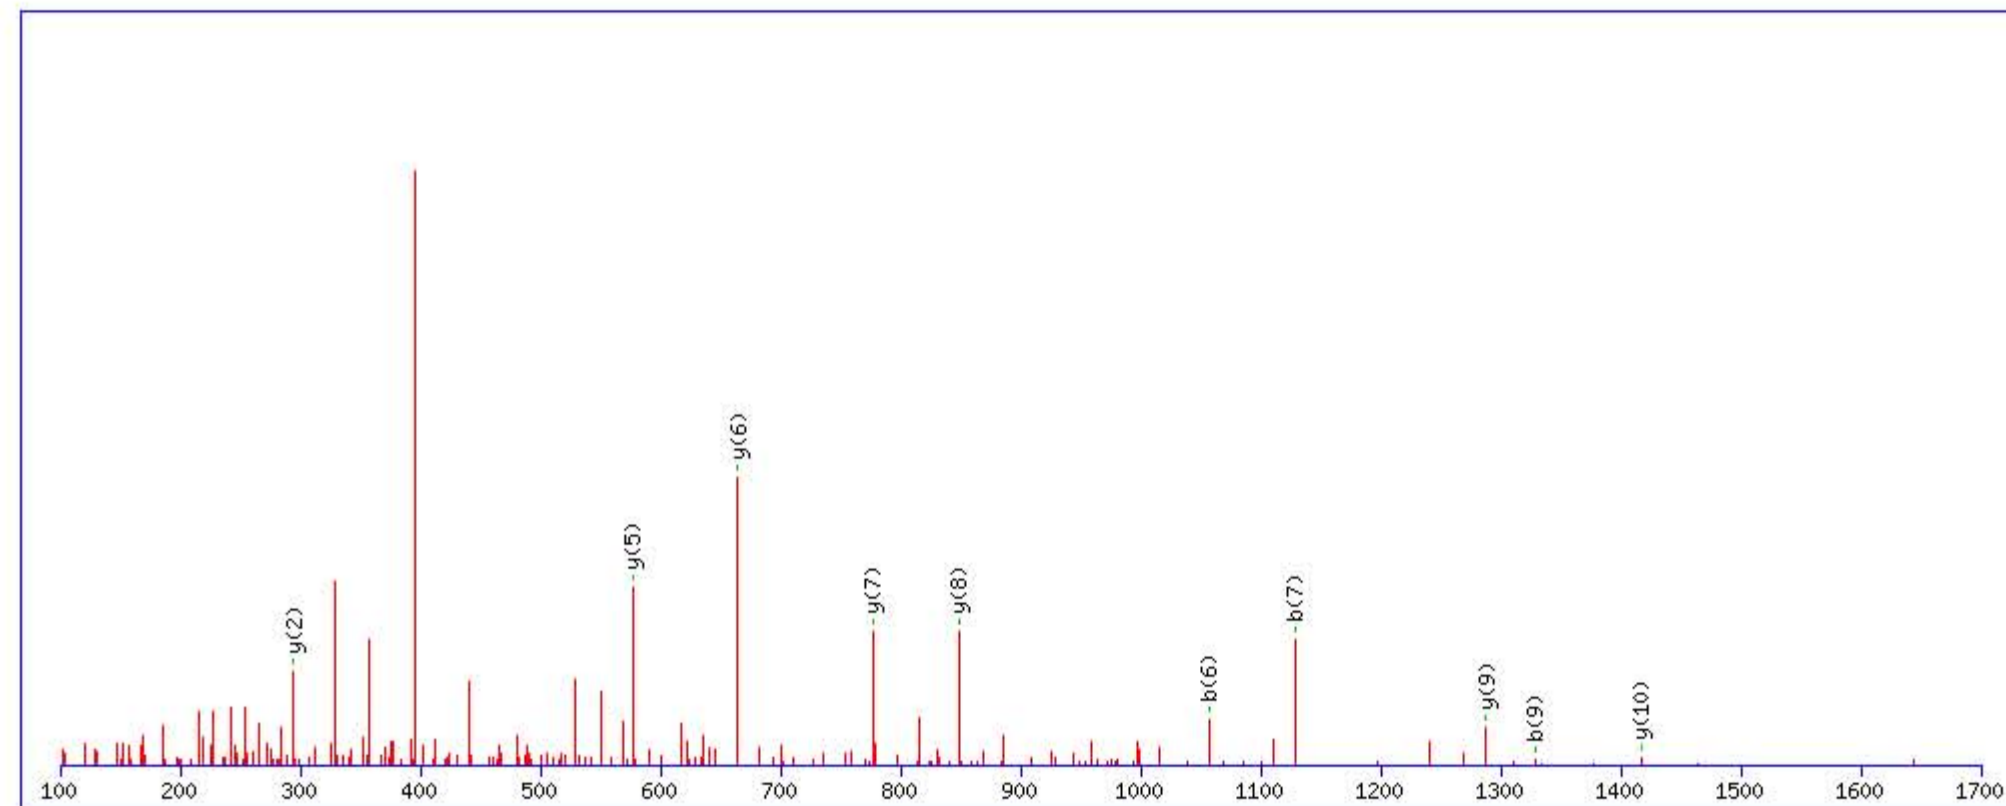

Monoisotopic mass of neutral peptide Mr(calc): 1903.942337

Fixed modifications: Carbamidomethyl (C) (apply to specified residues or termini only)

Variable modifications:

Q6 : Biotin:Thermo-21345 (Q)

Ions Score: 45 Expect: 0.00014

Matches : 10/138 fragment ions using 15 most intense peaks [\(help\)](#)

| #  | b                  | b <sup>++</sup> | b <sup>+</sup> | b <sup>+++</sup> | b <sup>0</sup> | b <sup>0++</sup> | Seq. | y                  | y <sup>++</sup> | y <sup>+</sup> | y <sup>+++</sup> | y <sup>0</sup> | y <sup>0++</sup> | #  |
|----|--------------------|-----------------|----------------|------------------|----------------|------------------|------|--------------------|-----------------|----------------|------------------|----------------|------------------|----|
| 1  | 114.091340         | 57.549308       |                |                  |                |                  | L    |                    |                 |                |                  |                |                  | 14 |
| 2  | 243.133933         | 122.070605      |                |                  | 225.123368     | 113.065322       | E    | 1791.865570        | 896.436423      | 1774.839021    | 887.923149       | 1773.855005    | 887.431141       | 13 |
| 3  | 358.160876         | 179.584076      |                |                  | 340.150311     | 170.578794       | D    | 1662.822977        | 831.915127      | 1645.796428    | 823.401852       | 1644.812412    | 822.909844       | 12 |
| 4  | 489.201361         | 245.104319      |                |                  | 471.190796     | 236.099036       | M    | 1547.796034        | 774.401655      | 1530.769485    | 765.888381       | 1529.785469    | 765.396373       | 11 |
| 5  | 618.243954         | 309.625615      |                |                  | 600.233389     | 300.620333       | E    | <b>1416.755549</b> | 708.881413      | 1399.729000    | 700.368138       | 1398.744984    | 699.876130       | 10 |
| 6  | <b>1057.469280</b> | 529.238278      | 1040.442731    | 520.725004       | 1039.458715    | 520.232996       | Q    | <b>1287.712956</b> | 644.360116      | 1270.686407    | 635.846842       | 1269.702391    | 635.354834       | 9  |
| 7  | <b>1128.506394</b> | 564.756835      | 1111.479845    | 556.243561       | 1110.495829    | 555.751553       | A    | <b>848.487630</b>  | 424.747453      | 831.461081     | 416.234179       | 830.477065     | 415.742171       | 8  |
| 8  | 1241.590458        | 621.298867      | 1224.563909    | 612.785593       | 1223.579893    | 612.293584       | L    | <b>777.450516</b>  | 389.228896      | 760.423967     | 380.715622       | 759.439951     | 380.223614       | 7  |
| 9  | <b>1328.622486</b> | 664.814881      | 1311.595937    | 656.301607       | 1310.611921    | 655.809598       | S    | <b>664.366452</b>  | 332.686864      | 647.339903     | 324.173590       | 646.355887     | 323.681582       | 6  |
| 10 | 1425.675250        | 713.341263      | 1408.648701    | 704.827989       | 1407.664685    | 704.335981       | P    | <b>577.334424</b>  | 289.170850      | 560.307875     | 280.657576       | 559.323859     | 280.165568       | 5  |
| 11 | 1512.707278        | 756.857277      | 1495.680729    | 748.344003       | 1494.696713    | 747.851995       | S    | 480.281660         | 240.644468      | 463.255111     | 232.131194       | 462.271095     | 231.639186       | 4  |
| 12 | 1611.775692        | 806.391484      | 1594.749143    | 797.878210       | 1593.765127    | 797.386202       | V    | 393.249632         | 197.128454      | 376.223083     | 188.615180       |                |                  | 3  |
| 13 | 1758.844106        | 879.925691      | 1741.817557    | 871.412417       | 1740.833541    | 870.920409       | F    | <b>294.181218</b>  | 147.594247      | 277.154669     | 139.080973       |                |                  | 2  |
| 14 |                    |                 |                |                  |                |                  | K    | 147.112804         | 74.060040       | 130.086255     | 65.546765        |                |                  | 1  |

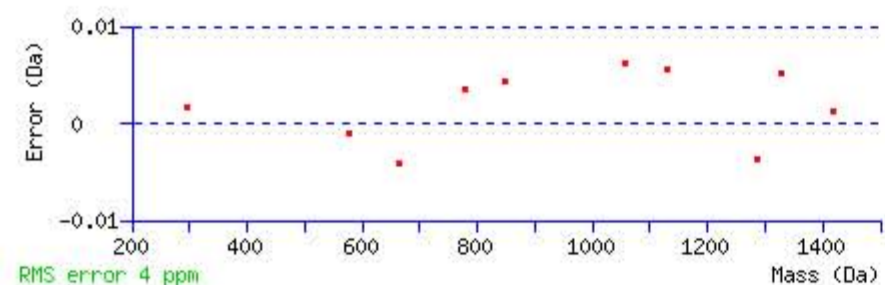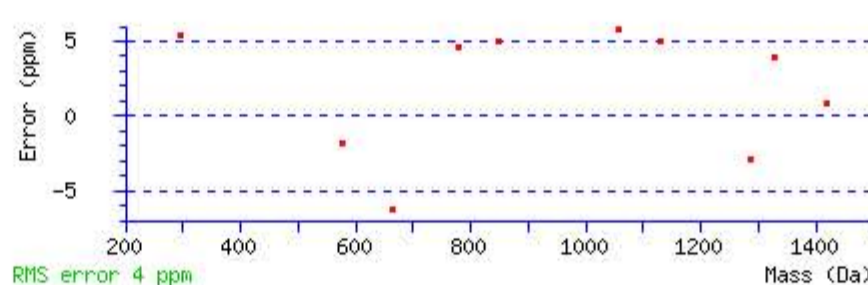

NCBI BLAST search of **LEDMEQALSPSVFK**

(Parameters: blastp, nr protein database, expect=20000, no filter, PAM30)

Other BLAST [web gateways](#)

All matches to this query

| Score | Mr(calc):   | Delta     | Sequence                         |
|-------|-------------|-----------|----------------------------------|
| 44.6  | 1903.942337 | -0.004235 | <a href="#">LEDMEQALSPSVFK</a>   |
| 3.6   | 1903.924377 | 0.013725  | <a href="#">LQSQRPSMASLMPSSR</a> |

Mascot: <http://www.matrixscience.com/>

# MASCOT SCIENCE Mascot Search Results

## Peptide View

MS/MS Fragmentation of **GVTSVSQIFHSPDLAIR**

Found in **IC1\_HUMAN**, Plasma protease C1 inhibitor OS=Homo sapiens GN=SERPING1 PE=1 SV=2

Match to Query 42160: 2137.133216 from(535.290580,4+) rtinseconds(2342) index(33791)

Title: Locus:1.1.1.3479.5 File:"2013-07-02 CLN FXIII 180 min 3rd F 3.wiff"

Data file C:\Program Files (x86)\Matrix Science\Mascot Daemon\mgf\9 FXIII 180 min 3rd\mascot\_daemon\_merge.mgf

Click mouse within plot area to zoom in by factor of two about that point

Or, Plot from  to  Da

Label all possible matches  Label matches used for scoring

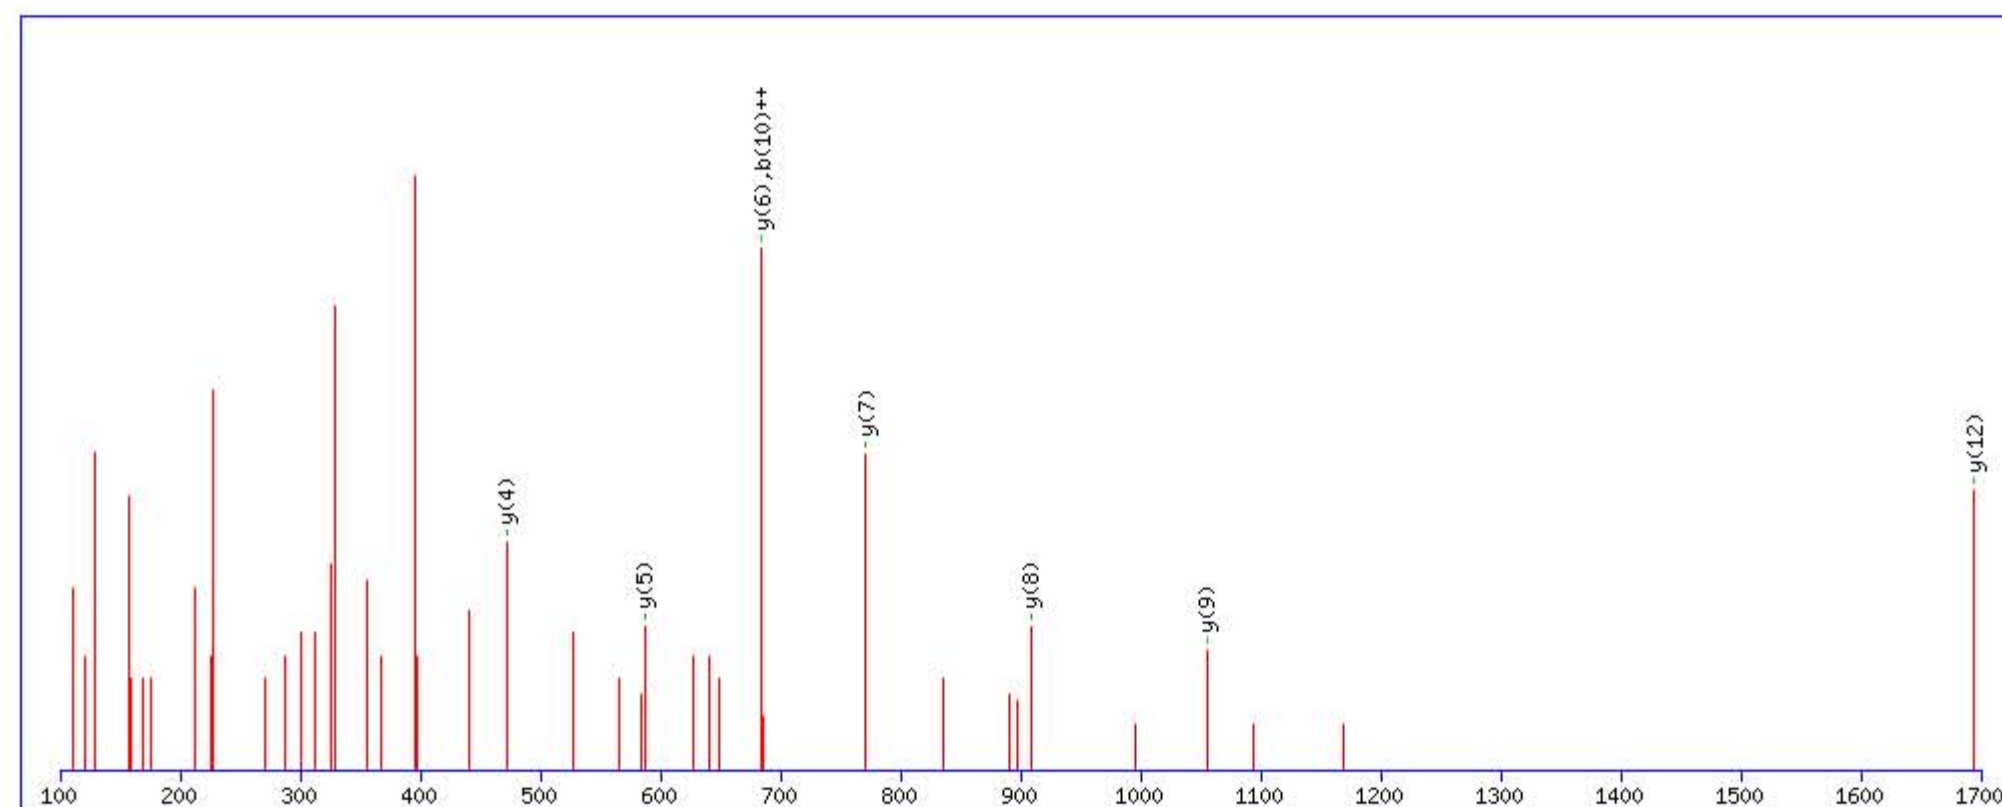

Monoisotopic mass of neutral peptide Mr(calc): 2137.135406

Fixed modifications: Carbamidomethyl (C) (apply to specified residues or termini only)

Variable modifications:

Q7 : Biotin:Thermo-21345 (Q)

Ions Score: 41 Expect: 0.0019

Matches : 8/168 fragment ions using 12 most intense peaks [\(help\)](#)

| #  | b           | b <sup>++</sup>   | b <sup>*</sup> | b <sup>*++</sup> | b <sup>0</sup> | b <sup>0++</sup> | Seq.     | y                  | y <sup>++</sup> | y <sup>*</sup> | y <sup>*++</sup> | y <sup>0</sup> | y <sup>0++</sup> | #  |
|----|-------------|-------------------|----------------|------------------|----------------|------------------|----------|--------------------|-----------------|----------------|------------------|----------------|------------------|----|
| 1  | 58.028740   | 29.518008         |                |                  |                |                  | <b>G</b> |                    |                 |                |                  |                |                  | 17 |
| 2  | 157.097154  | 79.052215         |                |                  |                |                  | <b>V</b> | 2081.121208        | 1041.064242     | 2064.094659    | 1032.550967      | 2063.110643    | 1032.058959      | 16 |
| 3  | 258.144833  | 129.576055        |                |                  | 240.134268     | 120.570772       | <b>T</b> | 1982.052794        | 991.530035      | 1965.026245    | 983.016761       | 1964.042229    | 982.524753       | 15 |
| 4  | 345.176861  | 173.092068        |                |                  | 327.166296     | 164.086786       | <b>S</b> | 1881.005115        | 941.006196      | 1863.978566    | 932.492921       | 1862.994550    | 932.000913       | 14 |
| 5  | 444.245275  | 222.626275        |                |                  | 426.234710     | 213.620993       | <b>V</b> | 1793.973087        | 897.490182      | 1776.946538    | 888.976907       | 1775.962522    | 888.484899       | 13 |
| 6  | 531.277303  | 266.142290        |                |                  | 513.266738     | 257.137007       | <b>S</b> | <b>1694.904673</b> | 847.955975      | 1677.878124    | 839.442700       | 1676.894108    | 838.950692       | 12 |
| 7  | 970.502629  | 485.754953        | 953.476080     | 477.241678       | 952.492064     | 476.749670       | <b>Q</b> | 1607.872645        | 804.439961      | 1590.846096    | 795.926686       | 1589.862080    | 795.434678       | 11 |
| 8  | 1083.586693 | 542.296985        | 1066.560144    | 533.783710       | 1065.576128    | 533.291702       | <b>I</b> | 1168.647319        | 584.827298      | 1151.620770    | 576.314023       | 1150.636754    | 575.822015       | 10 |
| 9  | 1230.655107 | 615.831192        | 1213.628558    | 607.317917       | 1212.644542    | 606.825909       | <b>F</b> | <b>1055.563255</b> | 528.285266      | 1038.536706    | 519.771991       | 1037.552690    | 519.279983       | 9  |
| 10 | 1367.714019 | <b>684.360648</b> | 1350.687470    | 675.847373       | 1349.703454    | 675.355365       | <b>H</b> | <b>908.494841</b>  | 454.751059      | 891.468292     | 446.237784       | 890.484276     | 445.745776       | 8  |
| 11 | 1454.746047 | 727.876662        | 1437.719498    | 719.363387       | 1436.735482    | 718.871379       | <b>S</b> | <b>771.435929</b>  | 386.221603      | 754.409380     | 377.708328       | 753.425364     | 377.216320       | 7  |
| 12 | 1551.798811 | 776.403044        | 1534.772262    | 767.889769       | 1533.788246    | 767.397761       | <b>P</b> | <b>684.403901</b>  | 342.705589      | 667.377352     | 334.192314       | 666.393336     | 333.700306       | 6  |
| 13 | 1666.825754 | 833.916515        | 1649.799205    | 825.403241       | 1648.815189    | 824.911233       | <b>D</b> | <b>587.351137</b>  | 294.179207      | 570.324588     | 285.665932       | 569.340572     | 285.173924       | 5  |
| 14 | 1779.909818 | 890.458547        | 1762.883269    | 881.945273       | 1761.899253    | 881.453265       | <b>L</b> | <b>472.324194</b>  | 236.665735      | 455.297645     | 228.152460       |                |                  | 4  |
| 15 | 1850.946932 | 925.977104        | 1833.920383    | 917.463830       | 1832.936367    | 916.971822       | <b>A</b> | 359.240130         | 180.123703      | 342.213581     | 171.610429       |                |                  | 3  |
| 16 | 1964.030996 | 982.519136        | 1947.004447    | 974.005862       | 1946.020431    | 973.513853       | <b>I</b> | 288.203016         | 144.605146      | 271.176467     | 136.091872       |                |                  | 2  |
| 17 |             |                   |                |                  |                |                  | <b>R</b> | 175.118952         | 88.063114       | 158.092403     | 79.549840        |                |                  | 1  |

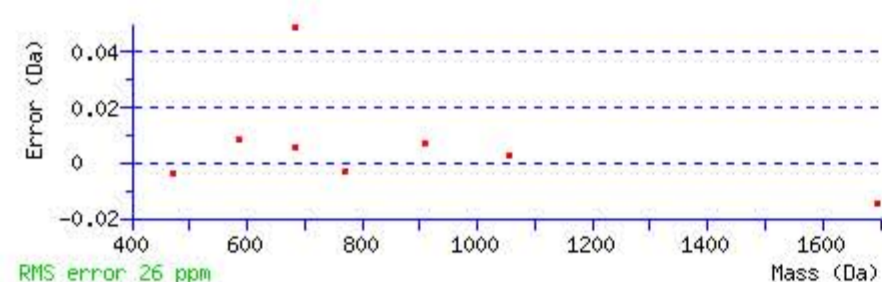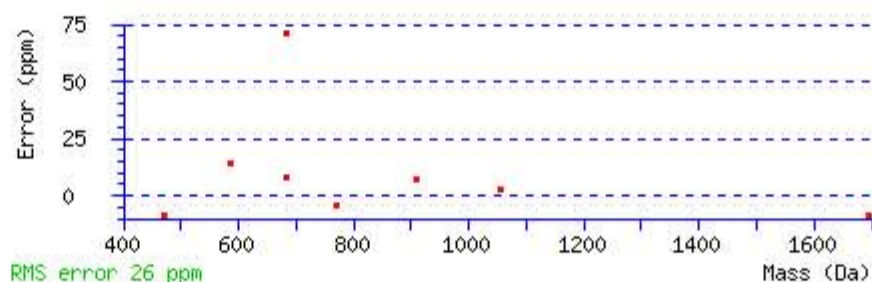

NCBI BLAST search of [GVTSVSQIFHSPDLAIR](#)

(Parameters: blastp, nr protein database, expect=20000, no filter, PAM30)

Other BLAST [web gateways](#)

## All matches to this query

| Score | Mr(calc):   | Delta     | Sequence                          |
|-------|-------------|-----------|-----------------------------------|
| 40.9  | 2137.135406 | -0.002190 | <a href="#">GVTSVSQIFHSPDLAIR</a> |

# MASCOT Search Results

## Peptide View

MS/MS Fragmentation of **EAQLPVIENK**

Found in **PLMN\_HUMAN**, Plasminogen OS=Homo sapiens GN=PLG PE=1 SV=2

Match to Query 25893: 1450.782108 from(726.398330,2+) rtinseconds(1991) index(19030)

Title: Locus:1.1.1.3259.9 File:"2013-07-02 CLN FXIII 180 min 3rd F 2.wiff"

Data file C:\Program Files (x86)\Matrix Science\Mascot Daemon\mgf\9 FXIII 180 min 3rd\mascot\_daemon\_merge.mgf

Click mouse within plot area to zoom in by factor of two about that point

Or, Plot from  to  Da

Label all possible matches  Label matches used for scoring

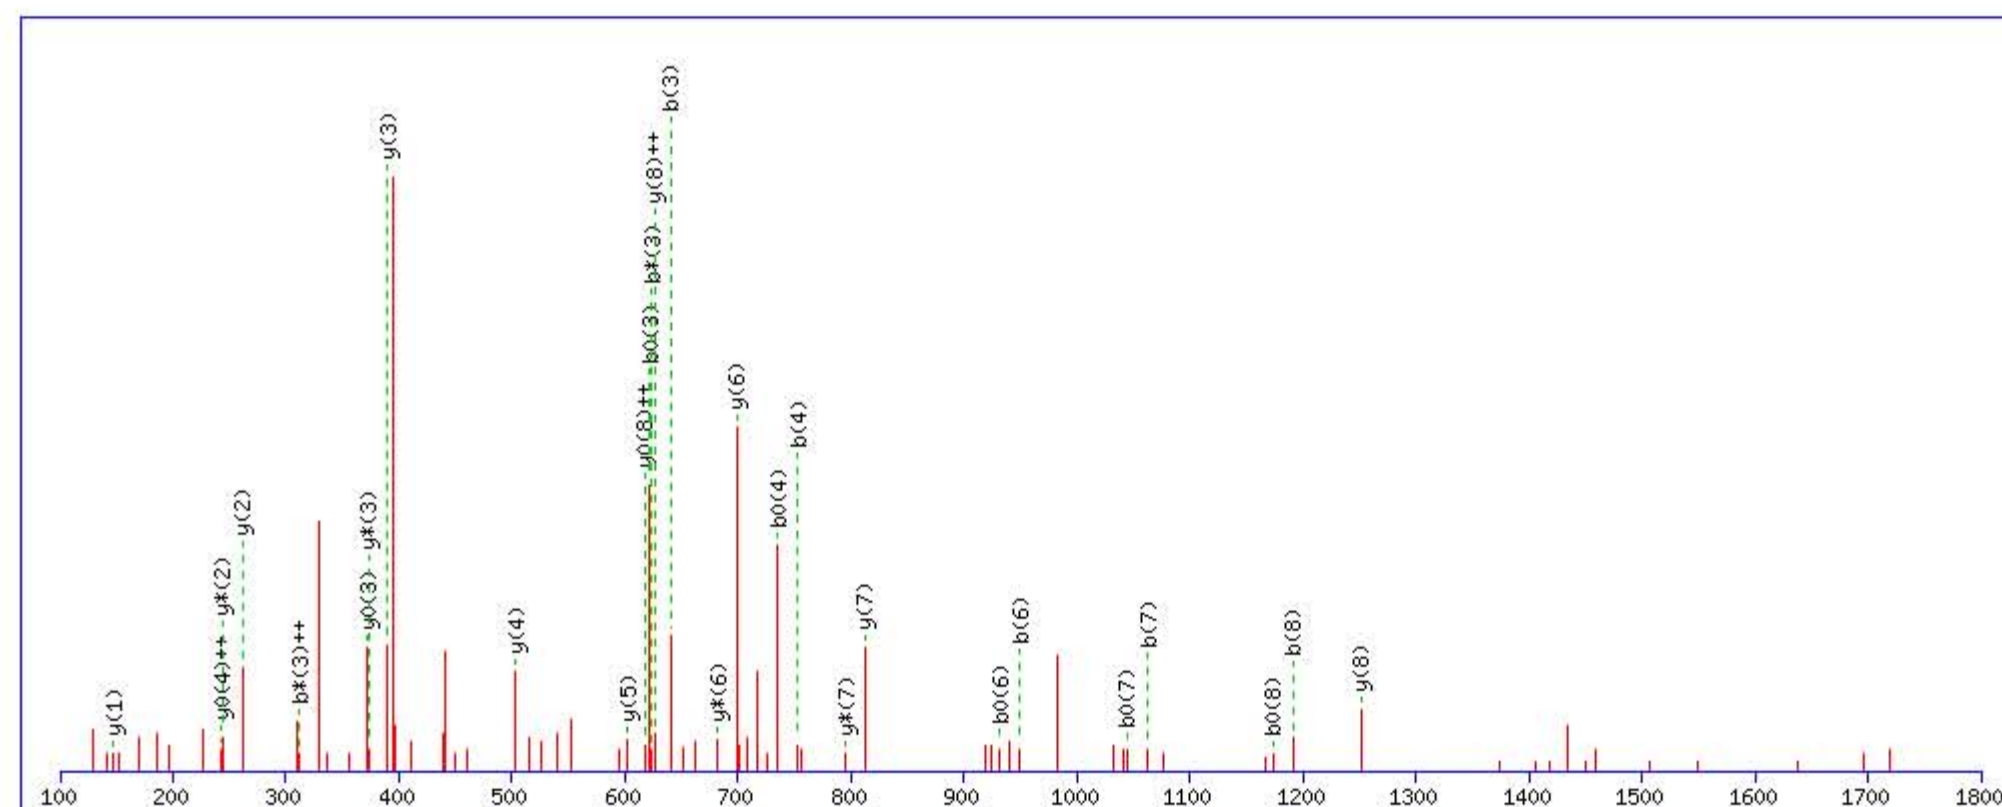

Monoisotopic mass of neutral peptide Mr(calc): 1450.785355

Fixed modifications: Carbamidomethyl (C) (apply to specified residues or termini only)

Variable modifications:

Q3 : Biotin:Thermo-21345 (Q)

Ions Score: 32 Expect: 0.014

Matches : 28/100 fragment ions using 71 most intense peaks ([help](#))

| #  | b                  | b <sup>++</sup> | b <sup>*</sup>    | b <sup>*++</sup>  | b <sup>0</sup>     | b <sup>0++</sup> | Seq. | y                  | y <sup>++</sup>   | y <sup>*</sup>    | y <sup>*++</sup> | y <sup>0</sup>    | y <sup>0++</sup>  | #  |
|----|--------------------|-----------------|-------------------|-------------------|--------------------|------------------|------|--------------------|-------------------|-------------------|------------------|-------------------|-------------------|----|
| 1  | 130.049869         | 65.528572       |                   |                   | 112.039304         | 56.523290        | E    |                    |                   |                   |                  |                   |                   | 10 |
| 2  | 201.086983         | 101.047130      |                   |                   | 183.076418         | 92.041847        | A    | 1322.750070        | 661.878673        | 1305.723521       | 653.365398       | 1304.739505       | 652.873390        | 9  |
| 3  | <b>640.312309</b>  | 320.659793      | <b>623.285760</b> | <b>312.146518</b> | <b>622.301744</b>  | 311.654510       | Q    | <b>1251.712956</b> | <b>626.360116</b> | 1234.686407       | 617.846841       | 1233.702391       | <b>617.354833</b> | 8  |
| 4  | <b>753.396373</b>  | 377.201825      | 736.369824        | 368.688550        | <b>735.385808</b>  | 368.196542       | L    | <b>812.487630</b>  | 406.747453        | <b>795.461081</b> | 398.234178       | 794.477065        | 397.742170        | 7  |
| 5  | 850.449137         | 425.728207      | 833.422588        | 417.214932        | 832.438572         | 416.722924       | P    | <b>699.403566</b>  | 350.205421        | <b>682.377017</b> | 341.692146       | 681.393001        | 341.200138        | 6  |
| 6  | <b>949.517551</b>  | 475.262414      | 932.491002        | 466.749139        | <b>931.506986</b>  | 466.257131       | V    | <b>602.350802</b>  | 301.679039        | 585.324253        | 293.165764       | 584.340237        | 292.673756        | 5  |
| 7  | <b>1062.601615</b> | 531.804446      | 1045.575066       | 523.291171        | <b>1044.591050</b> | 522.799163       | I    | <b>503.282388</b>  | 252.144832        | 486.255839        | 243.631557       | 485.271823        | <b>243.139549</b> | 4  |
| 8  | <b>1191.644208</b> | 596.325742      | 1174.617659       | 587.812468        | <b>1173.633643</b> | 587.320459       | E    | <b>390.198324</b>  | 195.602800        | <b>373.171775</b> | 187.089525       | <b>372.187759</b> | 186.597517        | 3  |
| 9  | 1305.687135        | 653.347205      | 1288.660586       | 644.833931        | 1287.676570        | 644.341923       | N    | <b>261.155731</b>  | 131.081503        | <b>244.129182</b> | 122.568229       |                   |                   | 2  |
| 10 |                    |                 |                   |                   |                    |                  | K    | <b>147.112804</b>  | 74.060040         | 130.086255        | 65.546765        |                   |                   | 1  |

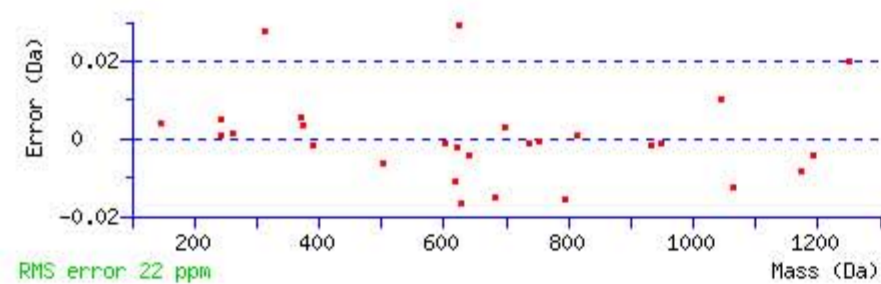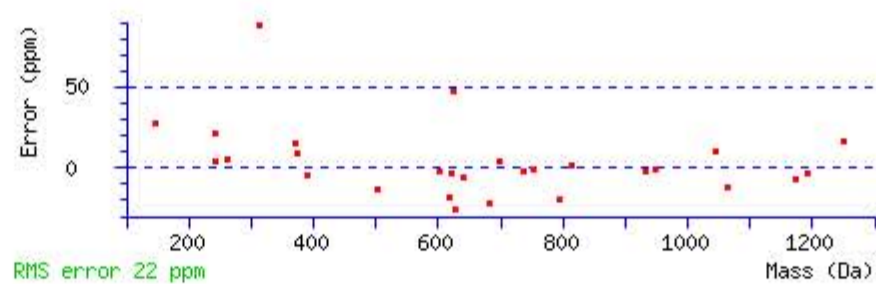

NCBI BLAST search of **EAQLPVIENK**

(Parameters: blastp, nr protein database, expect=20000, no filter, PAM30)

Other BLAST [web gateways](#)

All matches to this query

| Score | Mr(calc):   | Delta     | Sequence                   |
|-------|-------------|-----------|----------------------------|
| 31.6  | 1450.785355 | -0.003247 | <a href="#">EAQLPVIENK</a> |

Mascot: <http://www.matrixscience.com/>

# MASCOT SEARCH RESULTS

## Peptide View

MS/MS Fragmentation of **EQQCVIMAENR**

Found in **PLGB\_HUMAN**, Plasminogen-like protein B OS=Homo sapiens GN=PLGLB1 PE=1 SV=1

Match to Query 33449: 1687.784052 from(563.601960,3+) rtinseconds(1830) index(59592)

Title: Locus:1.1.1.1549.4 File:"2013-07-02 CLN FXIII 180 min 3rd FT.wiff"

Data file C:\Program Files (x86)\Matrix Science\Mascot Daemon\mgf\9 FXIII 180 min 3rd\mascot\_daemon\_merge.mgf

Click mouse within plot area to zoom in by factor of two about that point

Or, Plot from  to  Da

Label all possible matches  Label matches used for scoring

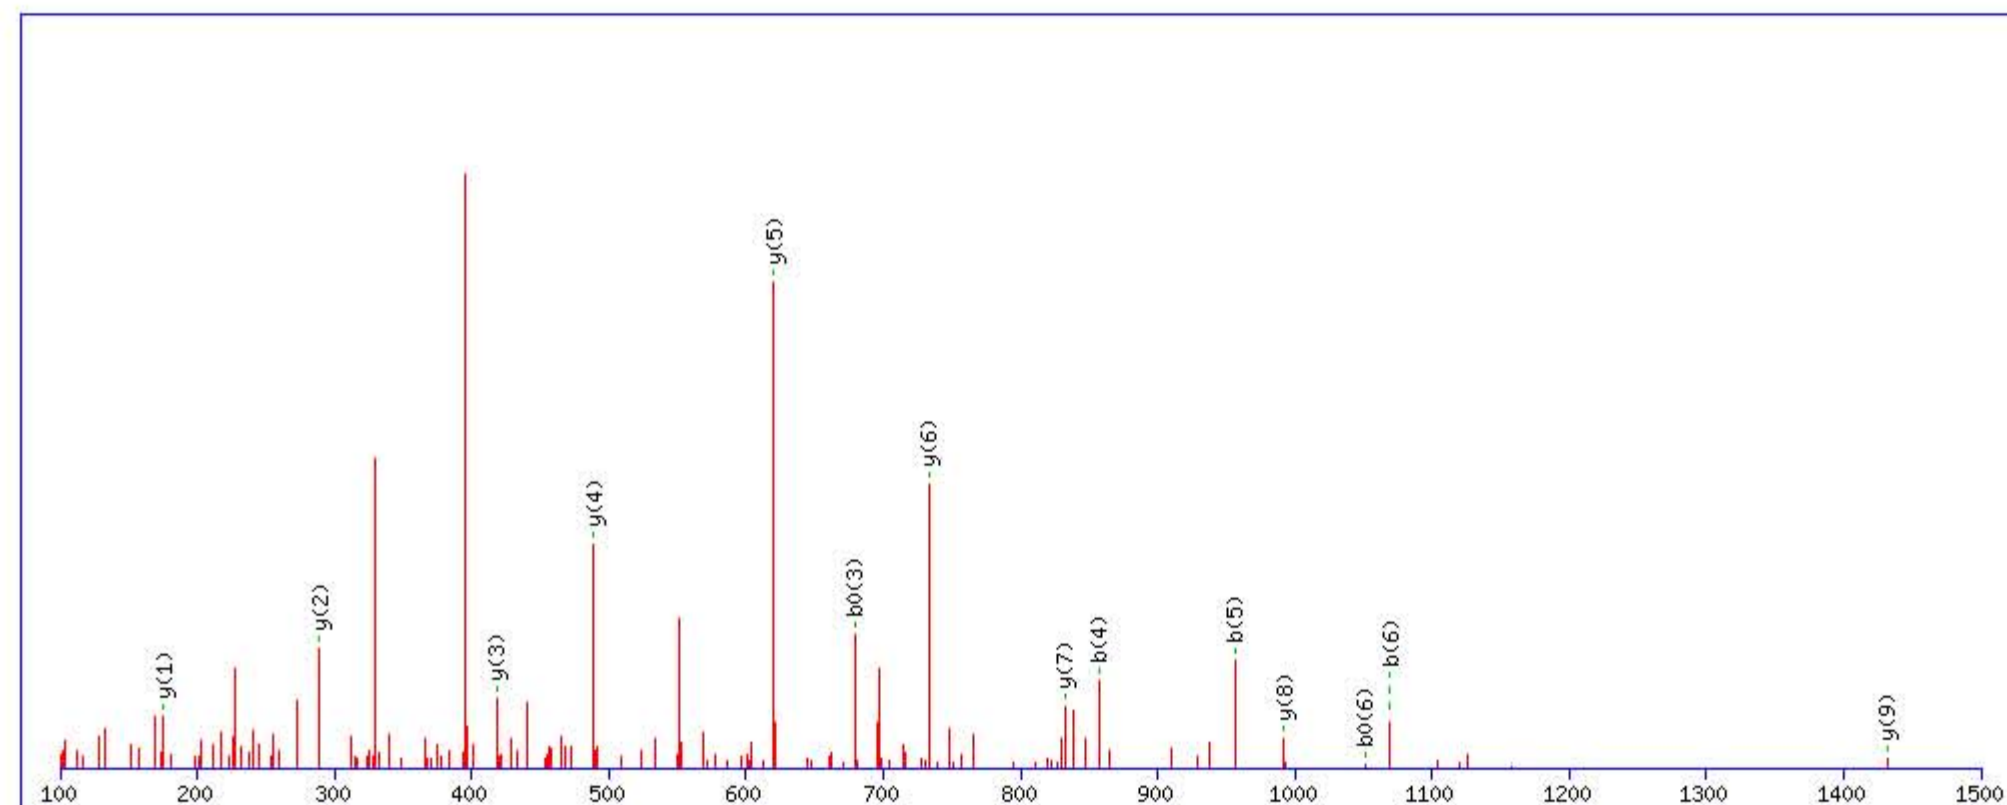

Monoisotopic mass of neutral peptide Mr(calc): 1687.784393

Fixed modifications: Carbamidomethyl (C) (apply to specified residues or termini only)

Variable modifications:

Q3 : Biotin:Thermo-21345 (Q)

Ions Score: 61 Expect: 1.9e-006

Matches : 14/114 fragment ions using 23 most intense peaks [\(help\)](#)

| #  | b           | b <sup>++</sup> | b <sup>*</sup> | b <sup>*++</sup> | b <sup>0</sup> | b <sup>0++</sup> | Seq. | y           | y <sup>++</sup> | y <sup>*</sup> | y <sup>*++</sup> | y <sup>0</sup> | y <sup>0++</sup> | #  |
|----|-------------|-----------------|----------------|------------------|----------------|------------------|------|-------------|-----------------|----------------|------------------|----------------|------------------|----|
| 1  | 130.049869  | 65.528572       |                |                  | 112.039304     | 56.523290        | E    |             |                 |                |                  |                |                  | 11 |
| 2  | 258.108447  | 129.557862      | 241.081898     | 121.044587       | 240.097882     | 120.552579       | Q    | 1559.749102 | 780.378189      | 1542.722553    | 771.864915       | 1541.738537    | 771.372907       | 10 |
| 3  | 697.333773  | 349.170525      | 680.307224     | 340.657250       | 679.323208     | 340.165242       | Q    | 1431.690524 | 716.348900      | 1414.663975    | 707.835626       | 1413.679959    | 707.343618       | 9  |
| 4  | 857.364422  | 429.185849      | 840.337873     | 420.672575       | 839.353857     | 420.180567       | C    | 992.465198  | 496.736237      | 975.438649     | 488.222963       | 974.454633     | 487.730955       | 8  |
| 5  | 956.432836  | 478.720056      | 939.406287     | 470.206782       | 938.422271     | 469.714774       | V    | 832.434549  | 416.720913      | 815.408000     | 408.207638       | 814.423984     | 407.715630       | 7  |
| 6  | 1069.516900 | 535.262088      | 1052.490351    | 526.748814       | 1051.506335    | 526.256806       | I    | 733.366135  | 367.186706      | 716.339586     | 358.673431       | 715.355570     | 358.181423       | 6  |
| 7  | 1200.557385 | 600.782331      | 1183.530836    | 592.269056       | 1182.546820    | 591.777048       | M    | 620.282071  | 310.644674      | 603.255522     | 302.131399       | 602.271506     | 301.639391       | 5  |
| 8  | 1271.594499 | 636.300888      | 1254.567950    | 627.787613       | 1253.583934    | 627.295605       | A    | 489.241586  | 245.124431      | 472.215037     | 236.611156       | 471.231021     | 236.119148       | 4  |
| 9  | 1400.637092 | 700.822184      | 1383.610543    | 692.308910       | 1382.626527    | 691.816902       | E    | 418.204472  | 209.605874      | 401.177923     | 201.092600       | 400.193907     | 200.600592       | 3  |
| 10 | 1514.680019 | 757.843648      | 1497.653470    | 749.330373       | 1496.669454    | 748.838365       | N    | 289.161879  | 145.084577      | 272.135330     | 136.571303       |                |                  | 2  |
| 11 |             |                 |                |                  |                |                  | R    | 175.118952  | 88.063114       | 158.092403     | 79.549839        |                |                  | 1  |

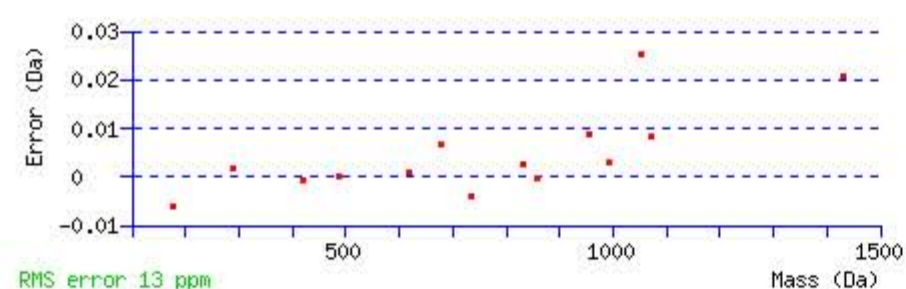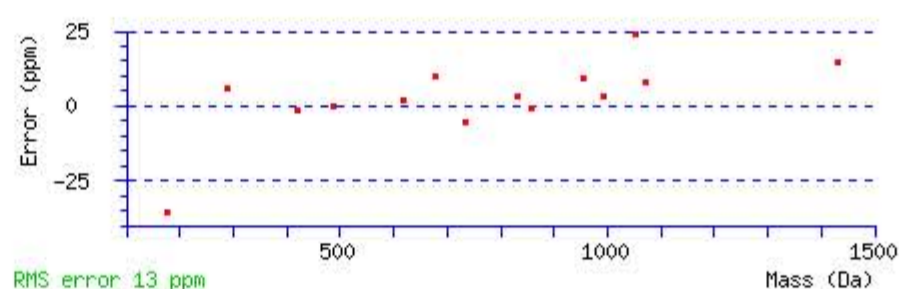

NCBI BLAST search of [EQQCVIMAENR](#)

(Parameters: blastp, nr protein database, expect=20000, no filter, PAM30)

Other BLAST [web gateways](#)

All matches to this query

| Score | Mr(calc):   | Delta     | Sequence                        |
|-------|-------------|-----------|---------------------------------|
| 61.5  | 1687.784393 | -0.000341 | <a href="#">EQQCVIMAENR</a>     |
| 59.7  | 1687.784393 | -0.000341 | <a href="#">EQQCVIMAENR</a>     |
| 0.4   | 1687.787552 | -0.003500 | <a href="#">GASEDGEYFLMIRGK</a> |

Mascot: <http://www.matrixscience.com/>



# MASCOT Search Results

## Peptide View

MS/MS Fragmentation of **EQQCHEMAENR**

Found in **PLGB\_HUMAN**, Plasminogen-like protein B OS=Homo sapiens GN=PLGLB1 PE=1 SV=1

Match to Query 33450: 1687.789148 from(844.901850,2+) rtinseconds(1824) index(59571)

Title: Locus:1.1.1.1546.10 File:"2013-07-02 CLN FXIII 180 min 3rd FT.wiff"

Data file C:\Program Files (x86)\Matrix Science\Mascot Daemon\mgf\9 FXIII 180 min 3rd\mascot\_daemon\_merge.mgf

Click mouse within plot area to zoom in by factor of two about that point

Or, Plot from  to  Da

Label all possible matches  Label matches used for scoring

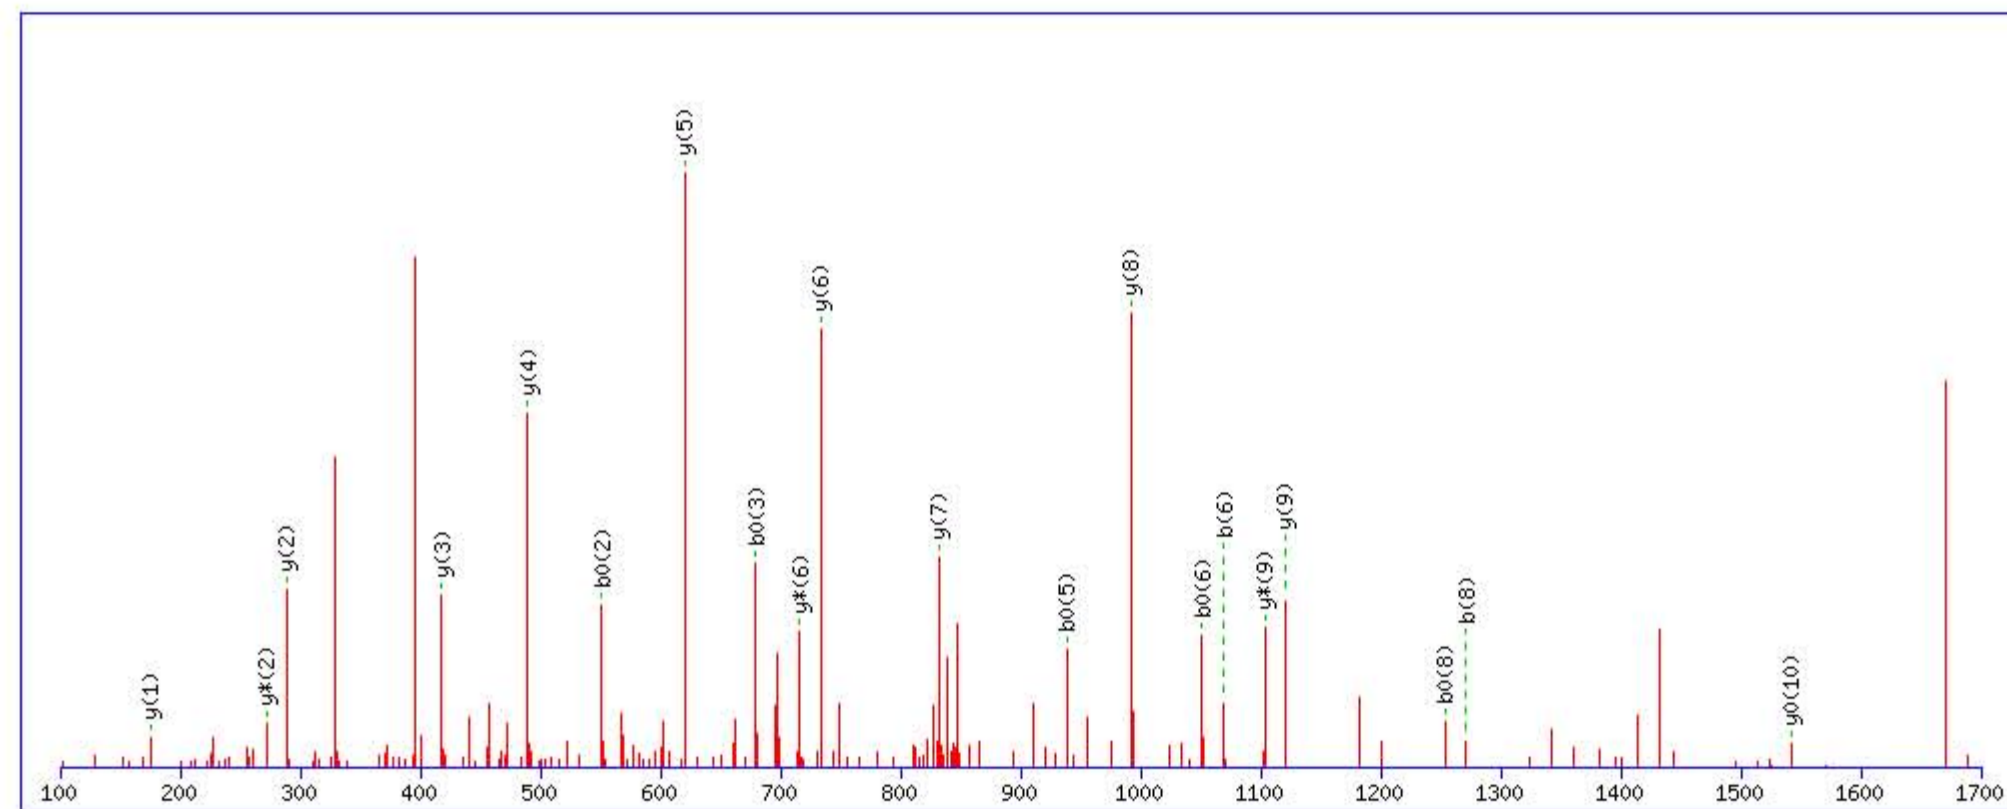

Monoisotopic mass of neutral peptide Mr(calc): 1687.784393

Fixed modifications: Carbamidomethyl (C) (apply to specified residues or termini only)

Variable modifications:

Q2 : Biotin:Thermo-21345 (Q)

Ions Score: 64 Expect: 2.7e-006

Matches : 20/114 fragment ions using 31 most intense peaks [\(help\)](#)

| #  | b           | b <sup>++</sup> | b <sup>*</sup> | b <sup>*++</sup> | b <sup>0</sup> | b <sup>0++</sup> | Seq. | y           | y <sup>++</sup> | y <sup>*</sup> | y <sup>*++</sup> | y <sup>0</sup> | y <sup>0++</sup> | #  |
|----|-------------|-----------------|----------------|------------------|----------------|------------------|------|-------------|-----------------|----------------|------------------|----------------|------------------|----|
| 1  | 130.049869  | 65.528572       |                |                  | 112.039304     | 56.523290        | E    |             |                 |                |                  |                |                  | 11 |
| 2  | 569.275195  | 285.141236      | 552.248646     | 276.627961       | 551.264630     | 276.135953       | Q    | 1559.749102 | 780.378189      | 1542.722553    | 771.864915       | 1541.738537    | 771.372907       | 10 |
| 3  | 697.333773  | 349.170525      | 680.307224     | 340.657250       | 679.323208     | 340.165242       | Q    | 1120.523776 | 560.765526      | 1103.497227    | 552.252252       | 1102.513211    | 551.760244       | 9  |
| 4  | 857.364422  | 429.185849      | 840.337873     | 420.672575       | 839.353857     | 420.180567       | C    | 992.465198  | 496.736237      | 975.438649     | 488.222963       | 974.454633     | 487.730955       | 8  |
| 5  | 956.432836  | 478.720056      | 939.406287     | 470.206782       | 938.422271     | 469.714774       | V    | 832.434549  | 416.720913      | 815.408000     | 408.207638       | 814.423984     | 407.715630       | 7  |
| 6  | 1069.516900 | 535.262088      | 1052.490351    | 526.748814       | 1051.506335    | 526.256806       | I    | 733.366135  | 367.186706      | 716.339586     | 358.673431       | 715.355570     | 358.181423       | 6  |
| 7  | 1200.557385 | 600.782331      | 1183.530836    | 592.269056       | 1182.546820    | 591.777048       | M    | 620.282071  | 310.644674      | 603.255522     | 302.131399       | 602.271506     | 301.639391       | 5  |
| 8  | 1271.594499 | 636.300888      | 1254.567950    | 627.787613       | 1253.583934    | 627.295605       | A    | 489.241586  | 245.124431      | 472.215037     | 236.611156       | 471.231021     | 236.119148       | 4  |
| 9  | 1400.637092 | 700.822184      | 1383.610543    | 692.308910       | 1382.626527    | 691.816902       | E    | 418.204472  | 209.605874      | 401.177923     | 201.092600       | 400.193907     | 200.600592       | 3  |
| 10 | 1514.680019 | 757.843648      | 1497.653470    | 749.330373       | 1496.669454    | 748.838365       | N    | 289.161879  | 145.084577      | 272.135330     | 136.571303       |                |                  | 2  |
| 11 |             |                 |                |                  |                |                  | R    | 175.118952  | 88.063114       | 158.092403     | 79.549839        |                |                  | 1  |

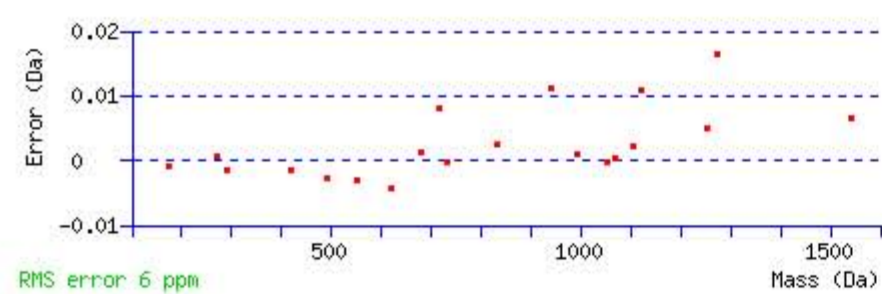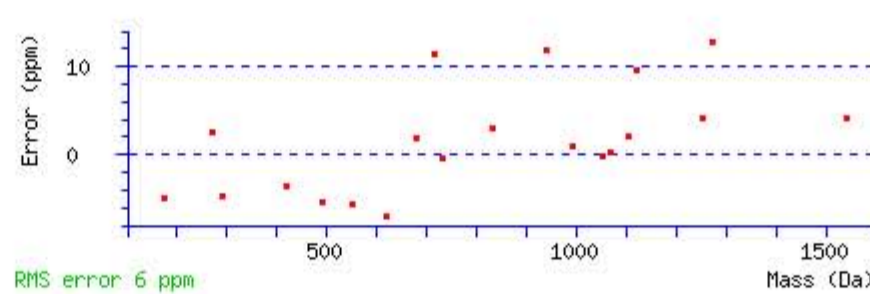

NCBI BLAST search of **EQQCHEMAENR**

(Parameters: blastp, nr protein database, expect=20000, no filter, PAM30)

Other BLAST [web gateways](#)

All matches to this query

| Score | Mr(calc):   | Delta     | Sequence                         |
|-------|-------------|-----------|----------------------------------|
| 63.9  | 1687.784393 | 0.004755  | <a href="#">EQQCHEMAENR</a>      |
| 61.5  | 1687.784393 | 0.004755  | <a href="#">EQQCHEMAENR</a>      |
| 4.2   | 1687.781006 | 0.008142  | <a href="#">ELMAWNQAENR</a>      |
| 2.9   | 1687.773193 | 0.015955  | <a href="#">FGAVCTCMEKATGLK</a>  |
| 1.8   | 1687.776093 | 0.013055  | <a href="#">QQEEAQAAAAASAESR</a> |
| 1.5   | 1687.773666 | 0.015482  | <a href="#">TTGPPSGQMPDNPPHR</a> |
| 0.0   | 1687.813370 | -0.024222 | <a href="#">MKQSPALAPEERCR</a>   |

# MASCOT SCIENCE Mascot Search Results

## Peptide View

MS/MS Fragmentation of **APWCHTTNSQVR**

Found in **PLMN\_HUMAN**, Plasminogen OS=Homo sapiens GN=PLG PE=1 SV=2

Match to Query 34984: 1766.825922 from(589.949250,3+) rtinseconds(1568) index(29194)

Title: Locus:1.1.1.3209.10 File:"2013-07-02 CLN FXIII 180 min 3rd F 3.wiff"

Data file C:\Program Files (x86)\Matrix Science\Mascot Daemon\mgf9 FXIII 180 min 3rd\mascot\_daemon\_merge.mgf

Click mouse within plot area to zoom in by factor of two about that point

Or, Plot from  to  Da

Label all possible matches  Label matches used for scoring

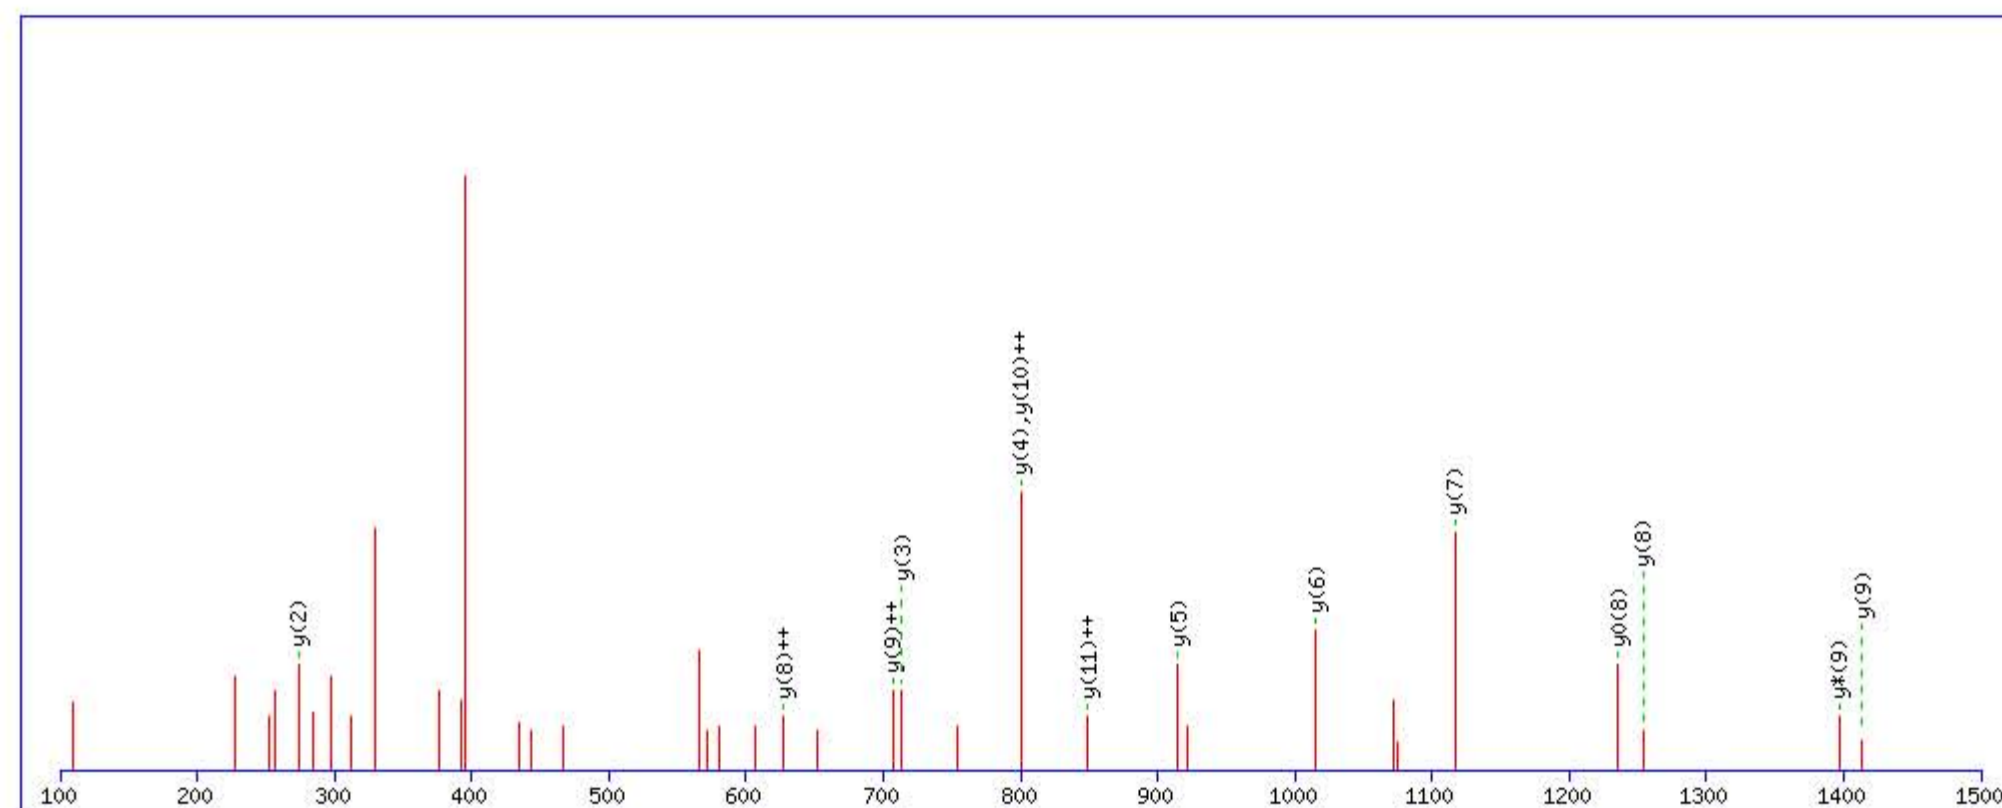

Monoisotopic mass of neutral peptide  $M_r(\text{calc})$ : 1766.834488

Fixed modifications: Carbamidomethyl (C) (apply to specified residues or termini only)

Variable modifications:

Q10 : Biotin:Thermo-21345 (Q)

Ions Score: 49 Expect: 0.00019

Matches : 14/102 fragment ions using 23 most intense peaks [\(help\)](#)

| #  | b           | b <sup>++</sup> | b <sup>+</sup> | b <sup>*++</sup> | b <sup>0</sup> | b <sup>0++</sup> | Seq. | y           | y <sup>++</sup> | y <sup>+</sup> | y <sup>*++</sup> | y <sup>0</sup> | y <sup>0++</sup> | #  |
|----|-------------|-----------------|----------------|------------------|----------------|------------------|------|-------------|-----------------|----------------|------------------|----------------|------------------|----|
| 1  | 72.044390   | 36.525833       |                |                  |                |                  | A    |             |                 |                |                  |                |                  | 12 |
| 2  | 169.097154  | 85.052215       |                |                  |                |                  | P    | 1696.804643 | 848.905960      | 1679.778094    | 840.392685       | 1678.794078    | 839.900677       | 11 |
| 3  | 355.176467  | 178.091872      |                |                  |                |                  | W    | 1599.751879 | 800.379578      | 1582.725330    | 791.866303       | 1581.741314    | 791.374295       | 10 |
| 4  | 515.207116  | 258.107196      |                |                  |                |                  | C    | 1413.672566 | 707.339921      | 1396.646017    | 698.826647       | 1395.662001    | 698.334639       | 9  |
| 5  | 652.266028  | 326.636652      |                |                  |                |                  | H    | 1253.641917 | 627.324597      | 1236.615368    | 618.811322       | 1235.631352    | 618.319314       | 8  |
| 6  | 753.313707  | 377.160492      |                |                  | 735.303142     | 368.155209       | T    | 1116.583005 | 558.795141      | 1099.556456    | 550.281866       | 1098.572440    | 549.789858       | 7  |
| 7  | 854.361386  | 427.684331      |                |                  | 836.350821     | 418.679049       | T    | 1015.535326 | 508.271301      | 998.508777     | 499.758027       | 997.524761     | 499.266019       | 6  |
| 8  | 968.404313  | 484.705795      | 951.377764     | 476.192520       | 950.393748     | 475.700512       | N    | 914.487647  | 457.747462      | 897.461098     | 449.234187       | 896.477082     | 448.742179       | 5  |
| 9  | 1055.436341 | 528.221809      | 1038.409792    | 519.708534       | 1037.425776    | 519.216526       | S    | 800.444720  | 400.725998      | 783.418171     | 392.212724       | 782.434155     | 391.720716       | 4  |
| 10 | 1494.661667 | 747.834472      | 1477.635118    | 739.321197       | 1476.651102    | 738.829189       | Q    | 713.412692  | 357.209984      | 696.386143     | 348.696710       |                |                  | 3  |
| 11 | 1593.730081 | 797.368679      | 1576.703532    | 788.855404       | 1575.719516    | 788.363396       | V    | 274.187366  | 137.597321      | 257.160817     | 129.084047       |                |                  | 2  |
| 12 |             |                 |                |                  |                |                  | R    | 175.118952  | 88.063114       | 158.092403     | 79.549839        |                |                  | 1  |

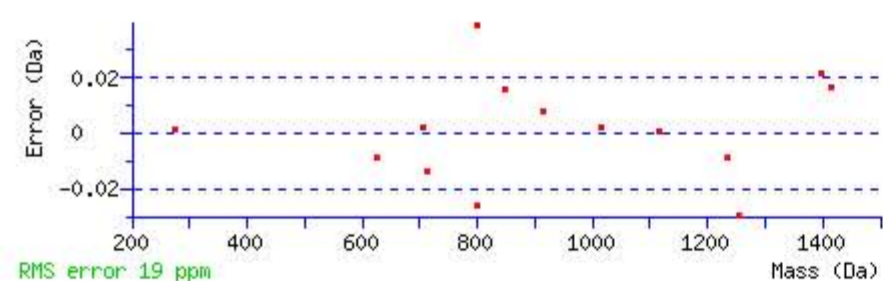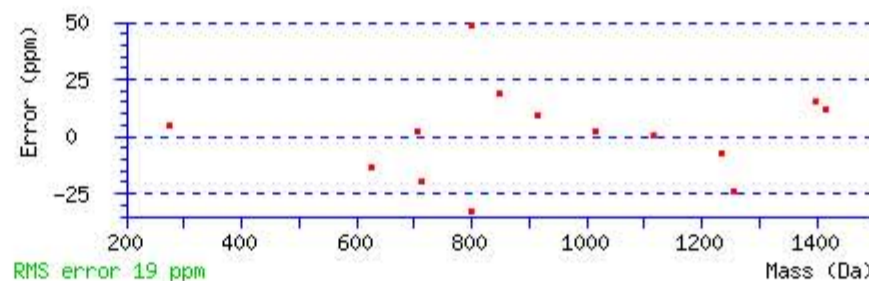

NCBI BLAST search of **APWCHTTNSQVR**

(Parameters: blastp, nr protein database, expect=20000, no filter, PAM30)

Other BLAST [web gateways](#)

All matches to this query

| Score | $M_r(\text{calc})$ : | Delta     | Sequence                     |
|-------|----------------------|-----------|------------------------------|
| 49.0  | 1766.834488          | -0.008566 | <a href="#">APWCHTTNSQVR</a> |

Mascot: <http://www.matrixscience.com/>

# MASCOT SEARCH RESULTS

## Peptide View

MS/MS Fragmentation of **EQQCHEMAENR**

Found in **PLGB\_HUMAN**, Plasminogen-like protein B OS=Homo sapiens GN=PLGLB1 PE=1 SV=1

Match to Query 39281: 1998.957132 from(667.326320,3+) rtinseconds(2139) index(61312)

Title: Locus:1.1.1.1656.17 File:"2013-07-02 CLN FXIII 180 min 3rd FT.wiff"

Data file C:\Program Files (x86)\Matrix Science\Mascot Daemon\mgf9 FXIII 180 min 3rd\mascot\_daemon\_merge.mgf

Click mouse within plot area to zoom in by factor of two about that point

Or, Plot from  to  Da

Label all possible matches  Label matches used for scoring

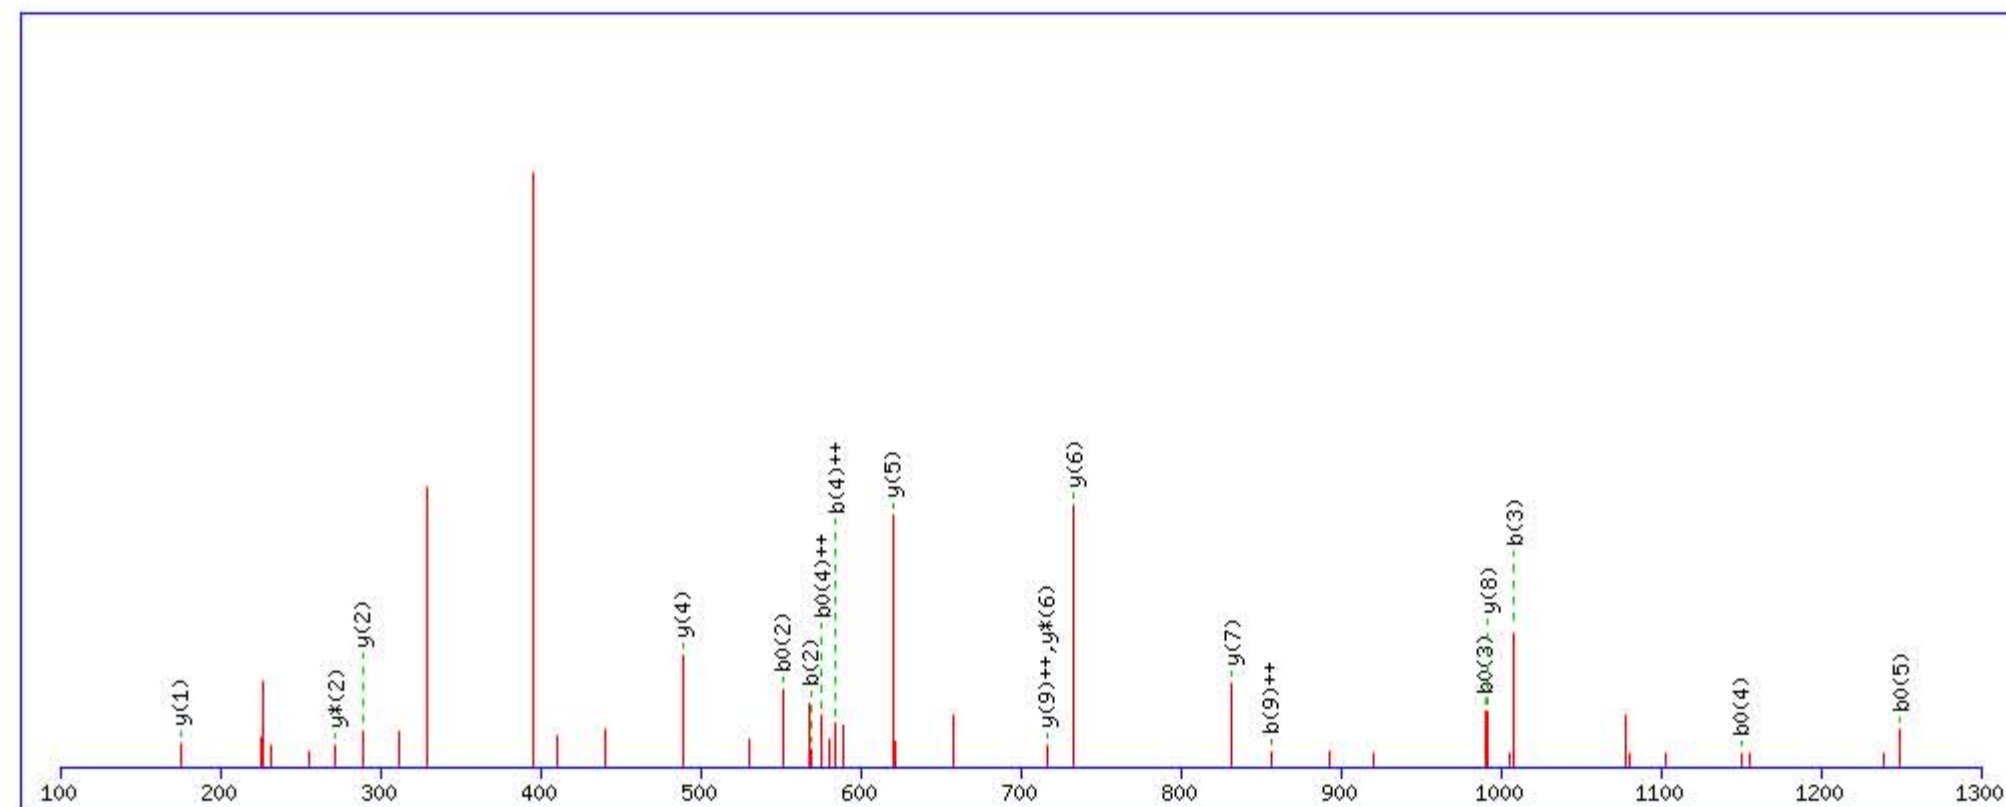

Monoisotopic mass of neutral peptide Mr(calc): 1998.951141

Fixed modifications: Carbamidomethyl (C) (apply to specified residues or termini only)

Variable modifications:

Q2 : Biotin:Thermo-21345 (Q)

Q3 : Biotin:Thermo-21345 (Q)

Ions Score: 28 Expect: 0.0028

Matches : 19/114 fragment ions using 38 most intense peaks [\(help\)](#)

| #  | b                  | b <sup>++</sup>   | b <sup>*</sup> | b <sup>*++</sup> | b <sup>0</sup>     | b <sup>0++</sup>  | Seq. | y                 | y <sup>++</sup>   | y <sup>*</sup>    | y <sup>*++</sup> | y <sup>0</sup> | y <sup>0++</sup> | #  |
|----|--------------------|-------------------|----------------|------------------|--------------------|-------------------|------|-------------------|-------------------|-------------------|------------------|----------------|------------------|----|
| 1  | 130.049869         | 65.528572         |                |                  | 112.039304         | 56.523290         | E    |                   |                   |                   |                  |                |                  | 11 |
| 2  | <b>569.275195</b>  | 285.141236        | 552.248646     | 276.627961       | <b>551.264630</b>  | 276.135953        | Q    | 1870.915850       | 935.961563        | 1853.889301       | 927.448288       | 1852.905285    | 926.956280       | 10 |
| 3  | <b>1008.500521</b> | 504.753899        | 991.473972     | 496.240624       | <b>990.489956</b>  | 495.748616        | Q    | 1431.690524       | <b>716.348900</b> | 1414.663975       | 707.835625       | 1413.679959    | 707.343617       | 9  |
| 4  | 1168.531170        | <b>584.769223</b> | 1151.504621    | 576.255949       | <b>1150.520605</b> | <b>575.763940</b> | C    | <b>992.465198</b> | 496.736237        | 975.438649        | 488.222962       | 974.454633     | 487.730954       | 8  |
| 5  | 1267.599584        | 634.303430        | 1250.573035    | 625.790156       | <b>1249.589019</b> | 625.298148        | V    | <b>832.434549</b> | 416.720912        | 815.408000        | 408.207638       | 814.423984     | 407.715630       | 7  |
| 6  | 1380.683648        | 690.845462        | 1363.657099    | 682.332188       | 1362.673083        | 681.840179        | I    | <b>733.366135</b> | 367.186705        | <b>716.339586</b> | 358.673431       | 715.355570     | 358.181423       | 6  |
| 7  | 1511.724133        | 756.365704        | 1494.697584    | 747.852430       | 1493.713568        | 747.360422        | M    | <b>620.282071</b> | 310.644673        | 603.255522        | 302.131399       | 602.271506     | 301.639391       | 5  |
| 8  | 1582.761247        | 791.884261        | 1565.734698    | 783.370987       | 1564.750682        | 782.878979        | A    | <b>489.241586</b> | 245.124431        | 472.215037        | 236.611156       | 471.231021     | 236.119148       | 4  |
| 9  | 1711.803840        | <b>856.405558</b> | 1694.777291    | 847.892283       | 1693.793275        | 847.400275        | E    | 418.204472        | 209.605874        | 401.177923        | 201.092599       | 400.193907     | 200.600591       | 3  |
| 10 | 1825.846767        | 913.427021        | 1808.820218    | 904.913747       | 1807.836202        | 904.421739        | N    | <b>289.161879</b> | 145.084577        | <b>272.135330</b> | 136.571303       |                |                  | 2  |
| 11 |                    |                   |                |                  |                    |                   | R    | <b>175.118952</b> | 88.063114         | 158.092403        | 79.549839        |                |                  | 1  |

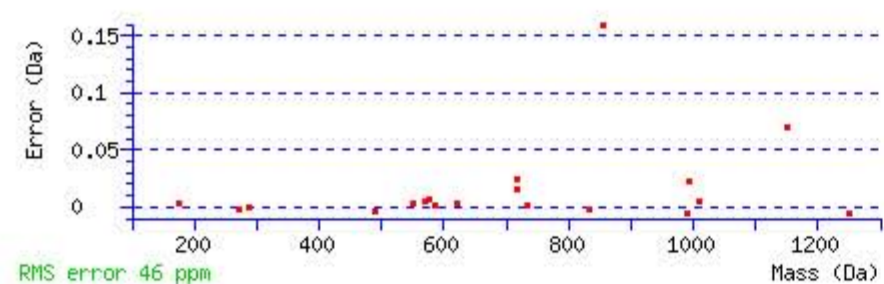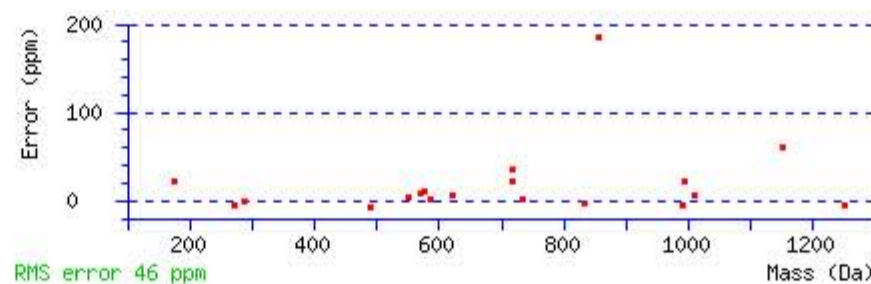

NCBI BLAST search of [EQQCHEMAENR](#)

(Parameters: blastp, nr protein database, expect=20000, no filter, PAM30)

Other BLAST [web gateways](#)

All matches to this query

| Score | Mr(calc):   | Delta    | Sequence                       |
|-------|-------------|----------|--------------------------------|
| 28.2  | 1998.951141 | 0.005991 | <a href="#">EQQCHEMAENR</a>    |
| 1.0   | 1998.929138 | 0.027994 | <a href="#">YEMLQDNVEGYRR</a>  |
| 0.1   | 1998.932526 | 0.024606 | <a href="#">NVMNKVSEMSSFQR</a> |

# MASCOT Search Results

## Peptide View

MS/MS Fragmentation of **CTTPPPSSGPTYQCLK**

Found in **PLMN\_HUMAN**, Plasminogen OS=Homo sapiens GN=PLG PE=1 SV=2

Match to Query 41683: 2103.980472 from(702.334100,3+) rtinseconds(1757) index(59225)

Title: Locus:1.1.1.1523.9 File:"2013-07-02 CLN FXIII 180 min 3rd FT.wiff"

Data file C:\Program Files (x86)\Matrix Science\Mascot Daemon\mgf\9 FXIII 180 min 3rd\mascot\_daemon\_merge.mgf

Click mouse within plot area to zoom in by factor of two about that point

Or, Plot from  to  Da

Label all possible matches  Label matches used for scoring

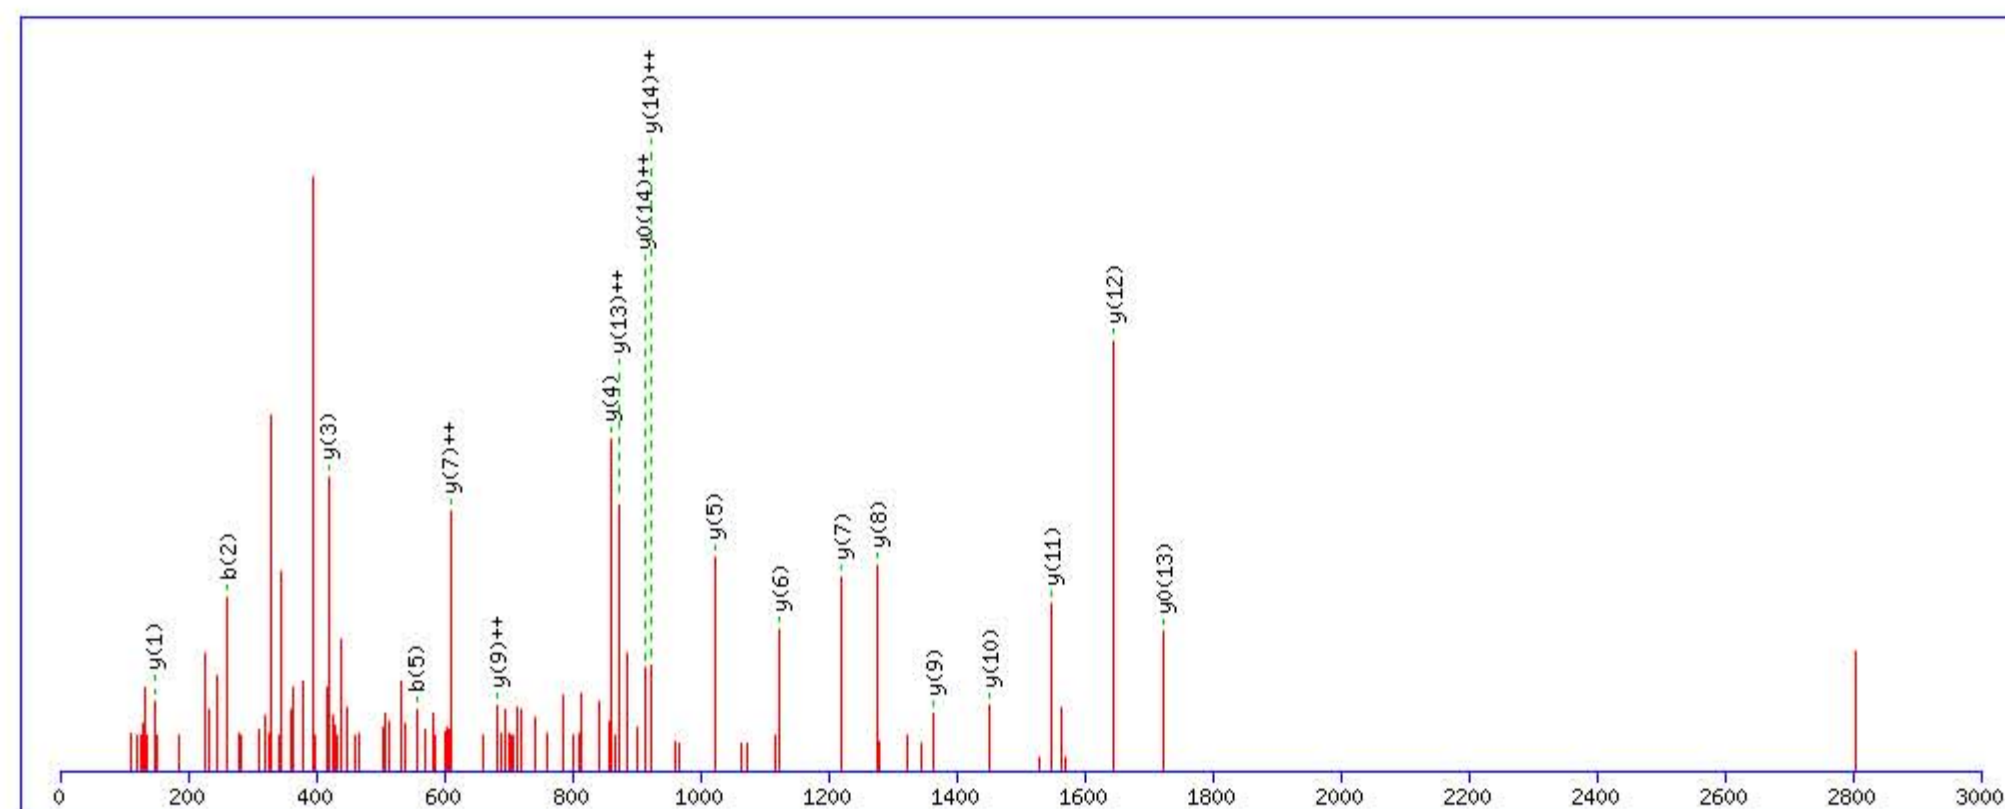

Monoisotopic mass of neutral peptide Mr(calc): 2103.979172

Fixed modifications: Carbamidomethyl (C) (apply to specified residues or termini only)

Variable modifications:

Q13 : Biotin:Thermo-21345 (Q)

Ions Score: 75 Expect: 4.2e-007

Matches : 19/144 fragment ions using 31 most intense peaks [\(help\)](#)

| #  | b                 | b <sup>++</sup> | b <sup>*</sup> | b <sup>*++</sup> | b <sup>0</sup> | b <sup>0++</sup> | Seq. | y                  | y <sup>++</sup>   | y <sup>*</sup> | y <sup>*++</sup> | y <sup>0</sup>     | y <sup>0++</sup>  | #  |
|----|-------------------|-----------------|----------------|------------------|----------------|------------------|------|--------------------|-------------------|----------------|------------------|--------------------|-------------------|----|
| 1  | 161.037925        | 81.022600       |                |                  |                |                  | C    |                    |                   |                |                  |                    |                   | 16 |
| 2  | <b>262.085604</b> | 131.546440      |                |                  | 244.075039     | 122.541158       | T    | 1944.955785        | 972.981531        | 1927.929236    | 964.468256       | 1926.945220        | 963.976248        | 15 |
| 3  | 363.133283        | 182.070280      |                |                  | 345.122718     | 173.064997       | T    | 1843.908106        | <b>922.457691</b> | 1826.881557    | 913.944417       | 1825.897541        | <b>913.452409</b> | 14 |
| 4  | 460.186047        | 230.596661      |                |                  | 442.175482     | 221.591379       | P    | 1742.860427        | <b>871.933852</b> | 1725.833878    | 863.420577       | <b>1724.849862</b> | 862.928569        | 13 |
| 5  | <b>557.238811</b> | 279.123044      |                |                  | 539.228246     | 270.117761       | P    | <b>1645.807663</b> | 823.407470        | 1628.781114    | 814.894195       | 1627.797098        | 814.402187        | 12 |
| 6  | 654.291575        | 327.649426      |                |                  | 636.281010     | 318.644143       | P    | <b>1548.754899</b> | 774.881088        | 1531.728350    | 766.367813       | 1530.744334        | 765.875805        | 11 |
| 7  | 741.323603        | 371.165440      |                |                  | 723.313038     | 362.160157       | S    | <b>1451.702135</b> | 726.354706        | 1434.675586    | 717.841431       | 1433.691570        | 717.349423        | 10 |
| 8  | 828.355631        | 414.681454      |                |                  | 810.345066     | 405.676171       | S    | <b>1364.670107</b> | <b>682.838692</b> | 1347.643558    | 674.325417       | 1346.659542        | 673.833409        | 9  |
| 9  | 885.377095        | 443.192186      |                |                  | 867.366530     | 434.186903       | G    | <b>1277.638079</b> | 639.322678        | 1260.611530    | 630.809403       | 1259.627514        | 630.317395        | 8  |
| 10 | 982.429859        | 491.718568      |                |                  | 964.419294     | 482.713285       | P    | <b>1220.616615</b> | <b>610.811946</b> | 1203.590066    | 602.298671       | 1202.606050        | 601.806663        | 7  |
| 11 | 1083.477538       | 542.242407      |                |                  | 1065.466973    | 533.237125       | T    | <b>1123.563851</b> | 562.285564        | 1106.537302    | 553.772289       | 1105.553286        | 553.280281        | 6  |
| 12 | 1246.540867       | 623.774072      |                |                  | 1228.530302    | 614.768789       | Y    | <b>1022.516172</b> | 511.761724        | 1005.489623    | 503.248450       |                    |                   | 5  |
| 13 | 1685.766193       | 843.386735      | 1668.739644    | 834.873460       | 1667.755628    | 834.381452       | Q    | <b>859.452843</b>  | 430.230060        | 842.426294     | 421.716785       |                    |                   | 4  |
| 14 | 1845.796842       | 923.402059      | 1828.770293    | 914.888785       | 1827.786277    | 914.396777       | C    | <b>420.227517</b>  | 210.617396        | 403.200968     | 202.104122       |                    |                   | 3  |
| 15 | 1958.880906       | 979.944091      | 1941.854357    | 971.430817       | 1940.870341    | 970.938809       | L    | 260.196868         | 130.602072        | 243.170319     | 122.088797       |                    |                   | 2  |
| 16 |                   |                 |                |                  |                |                  | K    | <b>147.112804</b>  | 74.060040         | 130.086255     | 65.546765        |                    |                   | 1  |

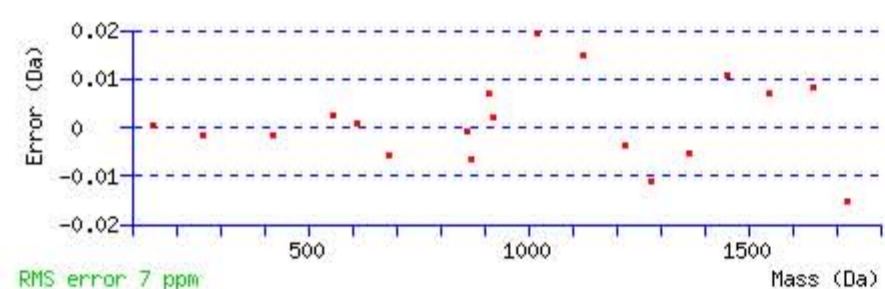

RMS error 7 ppm

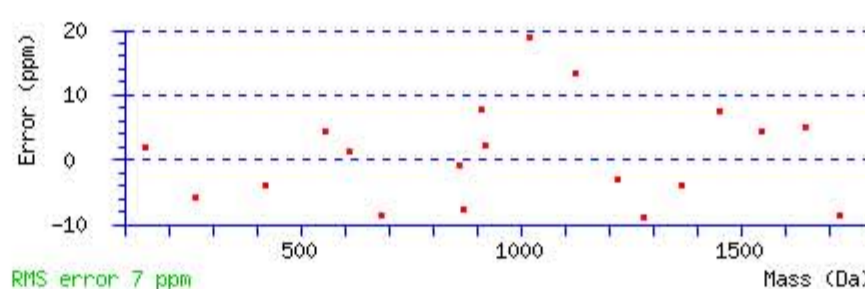

RMS error 7 ppm

NCBI BLAST search of [CTTPPPSSGPTYQCLK](#)

(Parameters: blastp, nr protein database, expect=20000, no filter, PAM30)

Other BLAST [web gateways](#)

All matches to this query

| Score | Mr(calc):   | Delta    | Sequence                           |
|-------|-------------|----------|------------------------------------|
| 75.1  | 2103.979172 | 0.001300 | <a href="#">CTTPPPSSGPTYQCLK</a>   |
| 7.0   | 2103.964554 | 0.015918 | <a href="#">TAADTPAIMNWDLFFTMK</a> |

Mascot: <http://www.matrixscience.com/>

# Mascot Search Results

## Peptide View

MS/MS Fragmentation of **ATTVTGTPCQDWAAQEPHR**

Found in **PLMN\_HUMAN**, Plasminogen OS=Homo sapiens GN=PLG PE=1 SV=2

Match to Query 47056: 2436.139272 from(813.053700,3+) rtinseconds(1875) index(59749)

Title: Locus:1.1.1.1564.10 File:"2013-07-02 CLN FXIII 180 min 3rd FT.wiff"

Data file C:\Program Files (x86)\Matrix Science\Mascot Daemon\mgf9 FXIII 180 min 3rd\mascot\_daemon\_merge.mgf

Click mouse within plot area to zoom in by factor of two about that point

Or, Plot from  to  Da

Label all possible matches  Label matches used for scoring

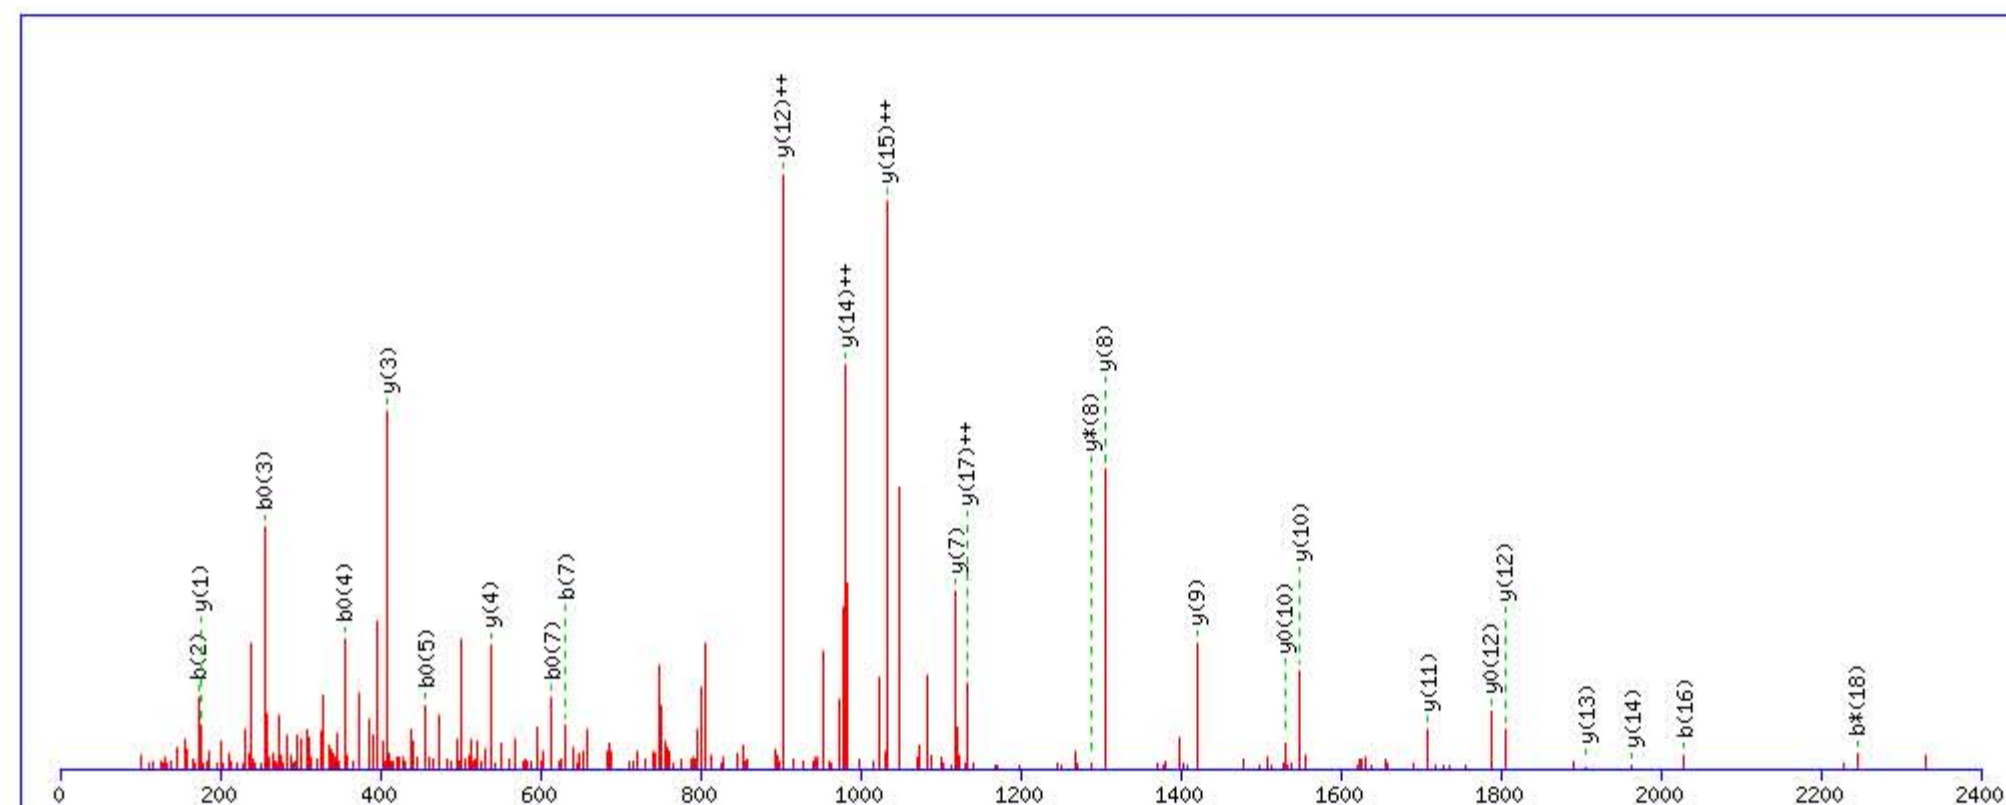

Monoisotopic mass of neutral peptide Mr(calc): 2436.131470

Fixed modifications: Carbamidomethyl (C) (apply to specified residues or termini only)

Variable modifications:

Q15 : Biotin:Thermo-21345 (Q)

Ions Score: 67 Expect: 3.3e-006

Matches : 26/190 fragment ions using 42 most intense peaks [\(help\)](#)

| #  | b                  | b <sup>++</sup> | b <sup>*</sup>     | b <sup>*++</sup> | b <sup>0</sup>    | b <sup>0++</sup> | Seq. | y                  | y <sup>++</sup>    | y <sup>*</sup>     | y <sup>*++</sup> | y <sup>0</sup>     | y <sup>0++</sup> | #  |
|----|--------------------|-----------------|--------------------|------------------|-------------------|------------------|------|--------------------|--------------------|--------------------|------------------|--------------------|------------------|----|
| 1  | 72.044390          | 36.525833       |                    |                  |                   |                  | A    |                    |                    |                    |                  |                    |                  | 19 |
| 2  | <b>173.092069</b>  | 87.049672       |                    |                  | 155.081504        | 78.044390        | T    | 2366.101616        | 1183.554446        | 2349.075067        | 1175.041171      | 2348.091051        | 1174.549163      | 18 |
| 3  | 274.139748         | 137.573512      |                    |                  | <b>256.129183</b> | 128.568230       | T    | 2265.053937        | <b>1133.030606</b> | 2248.027388        | 1124.517332      | 2247.043372        | 1124.025324      | 17 |
| 4  | 373.208162         | 187.107719      |                    |                  | <b>355.197597</b> | 178.102437       | V    | 2164.006258        | 1082.506767        | 2146.979709        | 1073.993492      | 2145.995693        | 1073.501484      | 16 |
| 5  | 474.255841         | 237.631559      |                    |                  | <b>456.245276</b> | 228.626276       | T    | 2064.937844        | <b>1032.972560</b> | 2047.911295        | 1024.459285      | 2046.927279        | 1023.967277      | 15 |
| 6  | 531.277305         | 266.142291      |                    |                  | 513.266740        | 257.137008       | G    | <b>1963.890165</b> | <b>982.448721</b>  | 1946.863616        | 973.935446       | 1945.879600        | 973.443438       | 14 |
| 7  | <b>632.324984</b>  | 316.666130      |                    |                  | <b>614.314419</b> | 307.660848       | T    | <b>1906.868701</b> | 953.937989         | 1889.842152        | 945.424714       | 1888.858136        | 944.932706       | 13 |
| 8  | 729.377748         | 365.192512      |                    |                  | 711.367183        | 356.187230       | P    | <b>1805.821022</b> | <b>903.414149</b>  | 1788.794473        | 894.900875       | <b>1787.810457</b> | 894.408867       | 12 |
| 9  | 889.408397         | 445.207837      |                    |                  | 871.397832        | 436.202554       | C    | <b>1708.768258</b> | 854.887767         | 1691.741709        | 846.374493       | 1690.757693        | 845.882485       | 11 |
| 10 | 1017.466975        | 509.237126      | 1000.440426        | 500.723851       | 999.456410        | 500.231843       | Q    | <b>1548.737609</b> | 774.872443         | 1531.711060        | 766.359168       | <b>1530.727044</b> | 765.867160       | 10 |
| 11 | 1132.493918        | 566.750597      | 1115.467369        | 558.237323       | 1114.483353       | 557.745315       | D    | <b>1420.679031</b> | 710.843154         | 1403.652482        | 702.329879       | 1402.668466        | 701.837871       | 9  |
| 12 | 1318.573231        | 659.790254      | 1301.546682        | 651.276979       | 1300.562666       | 650.784971       | W    | <b>1305.652088</b> | 653.329682         | <b>1288.625539</b> | 644.816408       | 1287.641523        | 644.324400       | 8  |
| 13 | 1389.610345        | 695.308811      | 1372.583796        | 686.795536       | 1371.599780       | 686.303528       | A    | <b>1119.572775</b> | 560.290026         | 1102.546226        | 551.776751       | 1101.562210        | 551.284743       | 7  |
| 14 | 1460.647459        | 730.827368      | 1443.620910        | 722.314093       | 1442.636894       | 721.822085       | A    | 1048.535661        | 524.771469         | 1031.509112        | 516.258194       | 1030.525096        | 515.766186       | 6  |
| 15 | 1899.872785        | 950.440031      | 1882.846236        | 941.926756       | 1881.862220       | 941.434748       | Q    | 977.498547         | 489.252912         | 960.471998         | 480.739637       | 959.487982         | 480.247629       | 5  |
| 16 | <b>2028.915378</b> | 1014.961327     | 2011.888829        | 1006.448053      | 2010.904813       | 1005.956045      | E    | <b>538.273221</b>  | 269.640249         | 521.246672         | 261.126974       | 520.262656         | 260.634966       | 4  |
| 17 | 2125.968142        | 1063.487709     | 2108.941593        | 1054.974434      | 2107.957577       | 1054.482427      | P    | <b>409.230628</b>  | 205.118952         | 392.204079         | 196.605677       |                    |                  | 3  |
| 18 | 2263.027054        | 1132.017165     | <b>2246.000505</b> | 1123.503890      | 2245.016489       | 1123.011883      | H    | 312.177864         | 156.592570         | 295.151315         | 148.079295       |                    |                  | 2  |
| 19 |                    |                 |                    |                  |                   |                  | R    | <b>175.118952</b>  | 88.063114          | 158.092403         | 79.549839        |                    |                  | 1  |

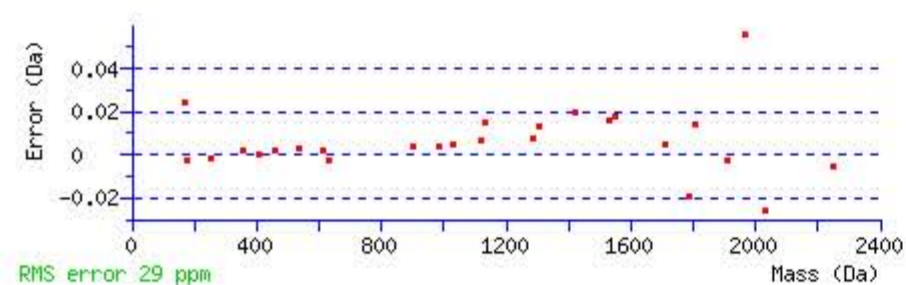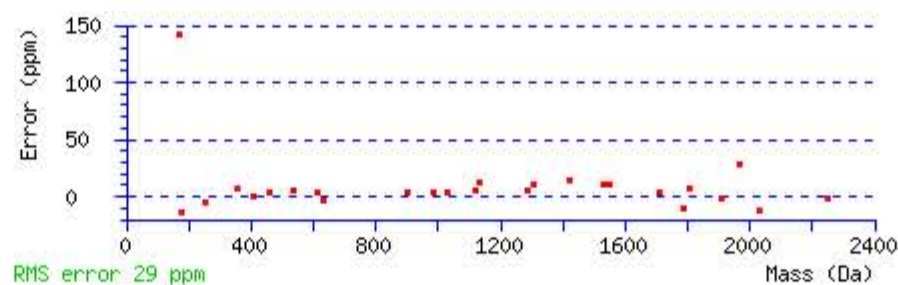

NCBI BLAST search of [ATTVTGTPCQDWAAQEPHR](#)

(Parameters: blastp, nr protein database, expect=20000, no filter, PAM30)

Other BLAST [web gateways](#)

All matches to this query

| Score | Mr(calc):   | Delta    | Sequence                            |
|-------|-------------|----------|-------------------------------------|
| 66.8  | 2436.131470 | 0.007802 | <a href="#">ATTVTGTPCQDWAAQEPHR</a> |
| 35.0  | 2436.131470 | 0.007802 | <a href="#">ATTVTGTPCQDWAAQEPHR</a> |

**MASCOT** Mascot Search Results

**Peptide View**

MS/MS Fragmentation of **NPDNDPQGPWCYTIDPEK**

Found in **PLMN\_HUMAN**, Plasminogen OS=Homo sapiens GN=PLG PE=1 SV=2

Match to Query 47178: 2444.045488 from(1223.030020,2+) rtinseconds(2102) index(61114)  
 Title: Locus:1.1.1.1643.11 File:"2013-07-02 CLN FXIII 180 min 3rd FT.wiff"  
 Data file C:\Program Files (x86)\Matrix Science\Mascot Daemon\mgf9 FXIII 180 min 3rd\mascot\_daemon\_merge.mgf

Click mouse within plot area to zoom in by factor of two about that point  
 Or, Plot from  to  Da   
 Label all possible matches  Label matches used for scoring

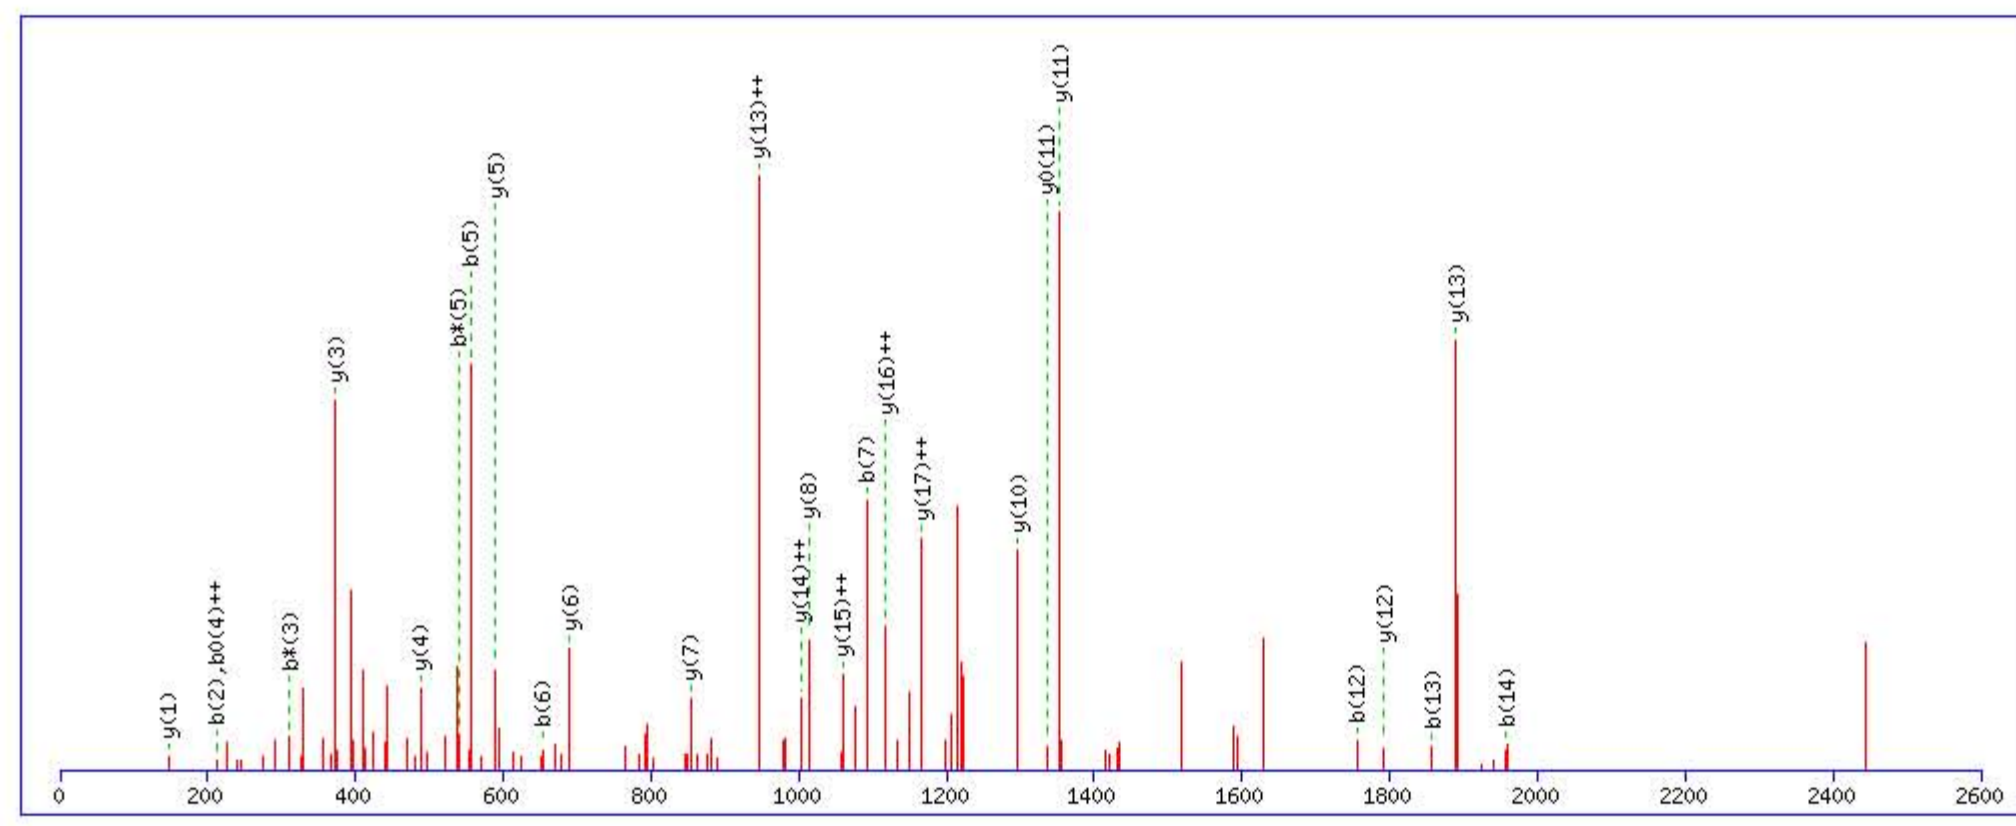

Monoisotopic mass of neutral peptide  $M_r(\text{calc})$ : 2444.041306  
 Fixed modifications: Carbamidomethyl (C) (apply to specified residues or termini only)  
 Variable modifications:  
 Q7 : Biotin:Thermo-21345 (Q)  
 Ions Score: 61 Expect: 5.8e-006  
 Matches : 27/198 fragment ions using 50 most intense peaks [\(help\)](#)

| #  | b                  | b <sup>++</sup> | b <sup>*</sup>    | b <sup>*++</sup> | b <sup>0</sup> | b <sup>0++</sup>  | Seq. | y                  | y <sup>++</sup>    | y <sup>*</sup> | y <sup>*++</sup> | y <sup>0</sup>     | y <sup>0++</sup> | #  |
|----|--------------------|-----------------|-------------------|------------------|----------------|-------------------|------|--------------------|--------------------|----------------|------------------|--------------------|------------------|----|
| 1  | 115.050203         | 58.028740       | 98.023654         | 49.515465        |                |                   | N    |                    |                    |                |                  |                    |                  | 18 |
| 2  | <b>212.102967</b>  | 106.555121      | 195.076418        | 98.041847        |                |                   | P    | 2331.005648        | <b>1166.006462</b> | 2313.979099    | 1157.493187      | 2312.995083        | 1157.001179      | 17 |
| 3  | 327.129910         | 164.068593      | <b>310.103361</b> | 155.555319       | 309.119345     | 155.063311        | D    | 2233.952884        | <b>1117.480080</b> | 2216.926335    | 1108.966805      | 2215.942319        | 1108.474797      | 16 |
| 4  | 441.172837         | 221.090057      | 424.146288        | 212.576782       | 423.162272     | <b>212.084774</b> | N    | 2118.925941        | <b>1059.966608</b> | 2101.899392    | 1051.453334      | 2100.915376        | 1050.961326      | 15 |
| 5  | <b>556.199780</b>  | 278.603528      | <b>539.173231</b> | 270.090254       | 538.189215     | 269.598246        | D    | 2004.883014        | <b>1002.945145</b> | 1987.856465    | 994.431871       | 1986.872449        | 993.939863       | 14 |
| 6  | <b>653.252544</b>  | 327.129910      | 636.225995        | 318.616636       | 635.241979     | 318.124628        | P    | <b>1889.856071</b> | <b>945.431673</b>  | 1872.829522    | 936.918399       | 1871.845506        | 936.426391       | 13 |
| 7  | <b>1092.477870</b> | 546.742573      | 1075.451321       | 538.229299       | 1074.467305    | 537.737290        | Q    | <b>1792.803307</b> | 896.905291         | 1775.776758    | 888.392017       | 1774.792742        | 887.900009       | 12 |
| 8  | 1149.499334        | 575.253305      | 1132.472785       | 566.740030       | 1131.488769    | 566.248022        | G    | <b>1353.577981</b> | 677.292629         | 1336.551432    | 668.779354       | <b>1335.567416</b> | 668.287346       | 11 |
| 9  | 1246.552098        | 623.779687      | 1229.525549       | 615.266413       | 1228.541533    | 614.774404        | P    | <b>1296.556517</b> | 648.781897         | 1279.529968    | 640.268622       | 1278.545952        | 639.776614       | 10 |
| 10 | 1432.631411        | 716.819343      | 1415.604862       | 708.306069       | 1414.620846    | 707.814061        | W    | 1199.503753        | 600.255515         | 1182.477204    | 591.742240       | 1181.493188        | 591.250232       | 9  |
| 11 | 1592.662060        | 796.834668      | 1575.635511       | 788.321394       | 1574.651495    | 787.829385        | C    | <b>1013.424440</b> | 507.215858         | 996.397891     | 498.702584       | 995.413875         | 498.210576       | 8  |
| 12 | <b>1755.725389</b> | 878.366333      | 1738.698840       | 869.853058       | 1737.714824    | 869.361050        | Y    | <b>853.393791</b>  | 427.200534         | 836.367242     | 418.687259       | 835.383226         | 418.195251       | 7  |
| 13 | <b>1856.773068</b> | 928.890172      | 1839.746519       | 920.376898       | 1838.762503    | 919.884889        | T    | <b>690.330462</b>  | 345.668869         | 673.303913     | 337.155595       | 672.319897         | 336.663587       | 6  |
| 14 | <b>1957.820747</b> | 979.414012      | 1940.794198       | 970.900737       | 1939.810182    | 970.408729        | T    | <b>589.282783</b>  | 295.145030         | 572.256234     | 286.631755       | 571.272218         | 286.139747       | 5  |
| 15 | 2072.847690        | 1036.927483     | 2055.821141       | 1028.414208      | 2054.837125    | 1027.922200       | D    | <b>488.235104</b>  | 244.621190         | 471.208555     | 236.107915       | 470.224539         | 235.615907       | 4  |
| 16 | 2169.900454        | 1085.453865     | 2152.873905       | 1076.940590      | 2151.889889    | 1076.448582       | P    | <b>373.208161</b>  | 187.107719         | 356.181612     | 178.594444       | 355.197596         | 178.102436       | 3  |
| 17 | 2298.943047        | 1149.975161     | 2281.916498       | 1141.461887      | 2280.932482    | 1140.969879       | E    | 276.155397         | 138.581337         | 259.128848     | 130.068062       | 258.144832         | 129.576054       | 2  |
| 18 |                    |                 |                   |                  |                |                   | K    | <b>147.112804</b>  | 74.060040          | 130.086255     | 65.546765        |                    |                  | 1  |

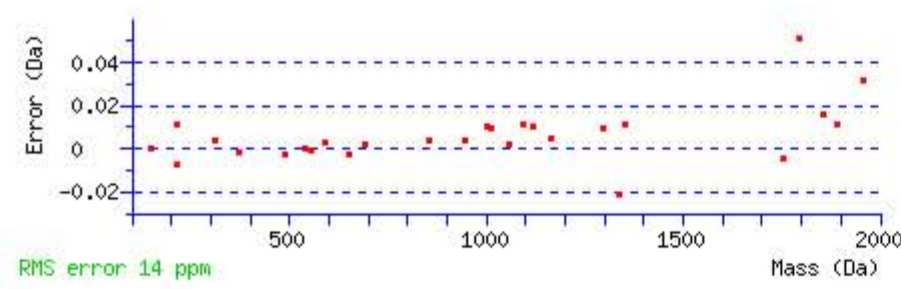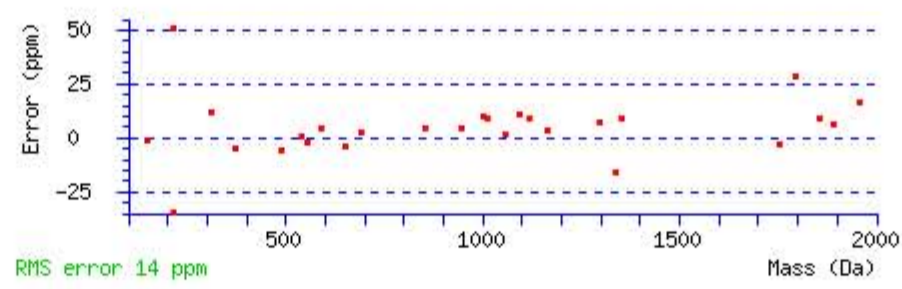

NCBI BLAST search of [NPDNDPQGPWCYTIDPEK](#)  
 (Parameters: blastp, nr protein database, expect=20000, no filter, PAM30)  
 Other BLAST [web gateways](#)

**All matches to this query**

| Score | $M_r(\text{calc})$ | Delta    | Sequence                           |
|-------|--------------------|----------|------------------------------------|
| 60.7  | 2444.041306        | 0.004182 | <a href="#">NPDNDPQGPWCYTIDPEK</a> |

# MASCOT Search Results

## Peptide View

MS/MS Fragmentation of **VVGGCVAHPHSWPWQVSLR**

Found in **PLMN\_HUMAN**, Plasminogen OS=Homo sapiens GN=PLG PE=1 SV=2

Match to Query 47998: 2482.254616 from(621.570930,4+) rtinseconds(2213) index(61710)

Title: Locus:1.1.1.1682.12 File:"2013-07-02 CLN FXIII 180 min 3rd FT.wiff"

Data file C:\Program Files (x86)\Matrix Science\Mascot Daemon\mgf9 FXIII 180 min 3rd\mascot\_daemon\_merge.mgf

Click mouse within plot area to zoom in by factor of two about that point

Or, Plot from  to  Da

Label all possible matches  Label matches used for scoring

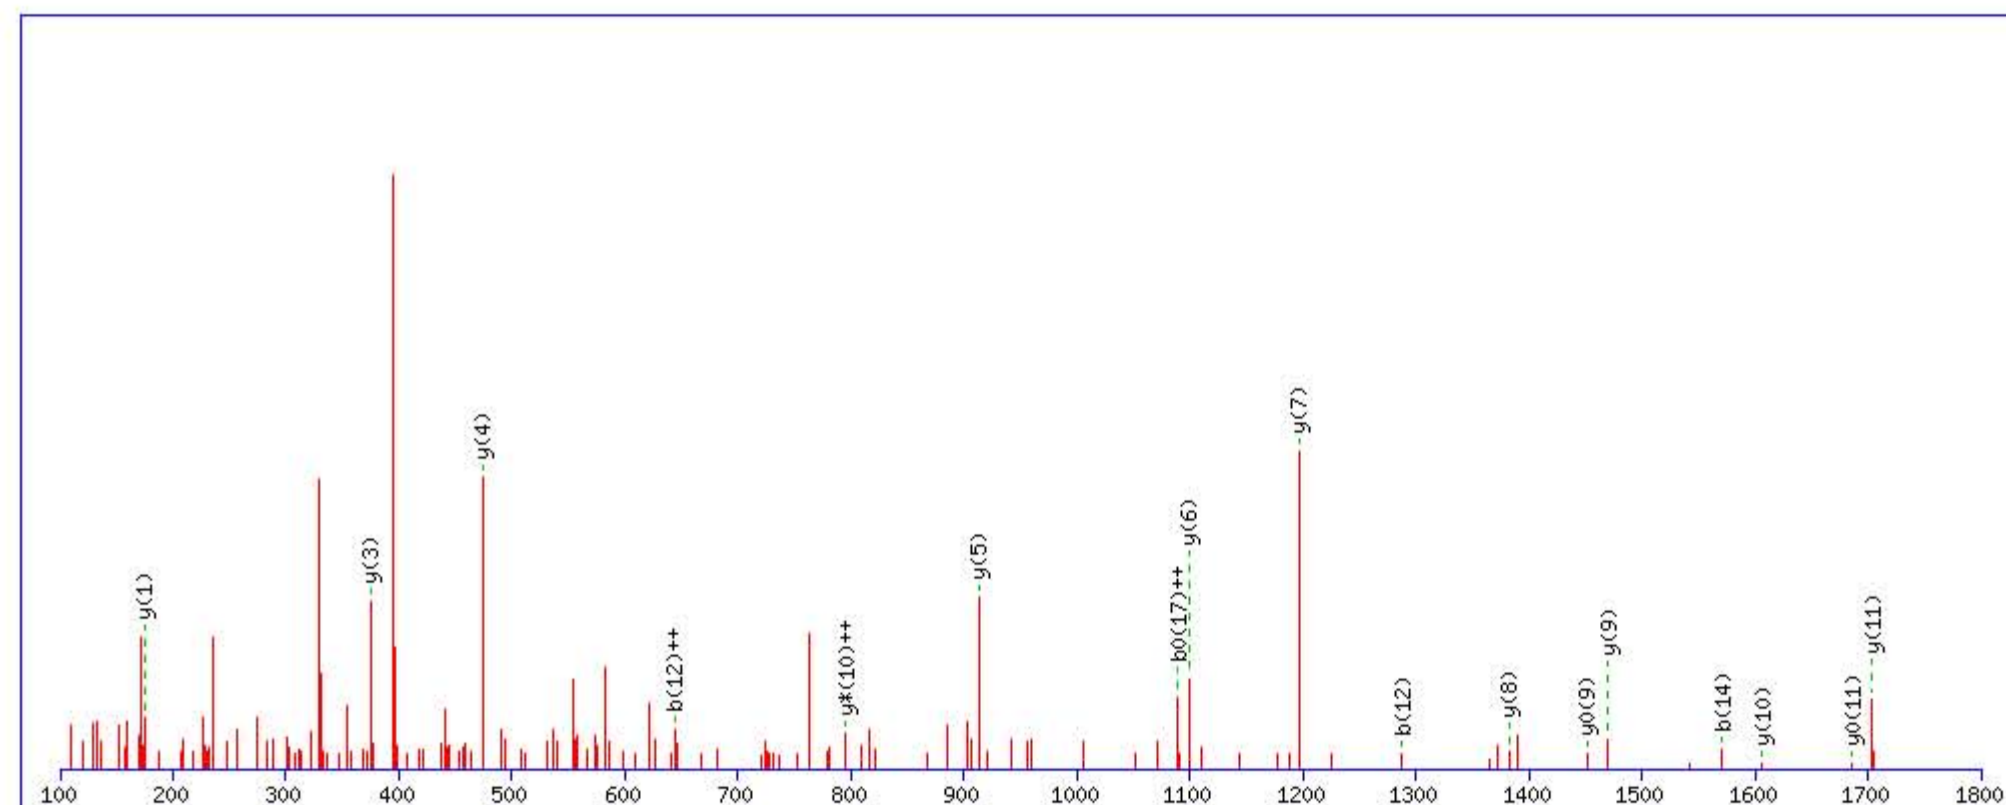

Monoisotopic mass of neutral peptide Mr(calc): 2482.251480

Fixed modifications: Carbamidomethyl (C) (apply to specified residues or termini only)

Variable modifications:

Q15 : Biotin:Thermo-21345 (Q)

Ions Score: 36 Expect: 0.00068

Matches : 17/164 fragment ions using 46 most intense peaks [\(help\)](#)

| #  | b                  | b <sup>++</sup>   | b <sup>*</sup> | b <sup>*++</sup> | b <sup>0</sup> | b <sup>0++</sup>   | Seq. | y                  | y <sup>++</sup> | y <sup>*</sup> | y <sup>*++</sup>  | y <sup>0</sup>     | y <sup>0++</sup> | #  |
|----|--------------------|-------------------|----------------|------------------|----------------|--------------------|------|--------------------|-----------------|----------------|-------------------|--------------------|------------------|----|
| 1  | 100.075690         | 50.541483         |                |                  |                |                    | V    |                    |                 |                |                   |                    |                  | 19 |
| 2  | 199.144104         | 100.075690        |                |                  |                |                    | V    | 2384.190309        | 1192.598792     | 2367.163760    | 1184.085518       | 2366.179744        | 1183.593510      | 18 |
| 3  | 256.165568         | 128.586422        |                |                  |                |                    | G    | 2285.121895        | 1143.064585     | 2268.095346    | 1134.551311       | 2267.111330        | 1134.059303      | 17 |
| 4  | 313.187032         | 157.097154        |                |                  |                |                    | G    | 2228.100431        | 1114.553853     | 2211.073882    | 1106.040579       | 2210.089866        | 1105.548571      | 16 |
| 5  | 473.217681         | 237.112479        |                |                  |                |                    | C    | 2171.078967        | 1086.043121     | 2154.052418    | 1077.529847       | 2153.068402        | 1077.037839      | 15 |
| 6  | 572.286095         | 286.646686        |                |                  |                |                    | V    | 2011.048318        | 1006.027797     | 1994.021769    | 997.514523        | 1993.037753        | 997.022515       | 14 |
| 7  | 643.323209         | 322.165243        |                |                  |                |                    | A    | 1911.979904        | 956.493590      | 1894.953355    | 947.980316        | 1893.969339        | 947.488308       | 13 |
| 8  | 780.382121         | 390.694699        |                |                  |                |                    | H    | 1840.942790        | 920.975033      | 1823.916241    | 912.461759        | 1822.932225        | 911.969751       | 12 |
| 9  | 877.434885         | 439.221081        |                |                  |                |                    | P    | <b>1703.883878</b> | 852.445577      | 1686.857329    | 843.932303        | <b>1685.873313</b> | 843.440295       | 11 |
| 10 | 1014.493797        | 507.750537        |                |                  |                |                    | H    | <b>1606.831114</b> | 803.919195      | 1589.804565    | <b>795.405921</b> | 1588.820549        | 794.913913       | 10 |
| 11 | 1101.525825        | 551.266550        |                |                  | 1083.515260    | 542.261268         | S    | <b>1469.772202</b> | 735.389739      | 1452.745653    | 726.876465        | <b>1451.761637</b> | 726.384457       | 9  |
| 12 | <b>1287.605138</b> | <b>644.306207</b> |                |                  | 1269.594573    | 635.300924         | W    | <b>1382.740174</b> | 691.873725      | 1365.713625    | 683.360451        | 1364.729609        | 682.868443       | 8  |
| 13 | 1384.657902        | 692.832589        |                |                  | 1366.647337    | 683.827306         | P    | <b>1196.660861</b> | 598.834069      | 1179.634312    | 590.320794        | 1178.650296        | 589.828786       | 7  |
| 14 | <b>1570.737215</b> | <b>785.872245</b> |                |                  | 1552.726650    | 776.866963         | W    | <b>1099.608097</b> | 550.307687      | 1082.581548    | 541.794412        | 1081.597532        | 541.302404       | 6  |
| 15 | 2009.962541        | 1005.484909       | 1992.935992    | 996.971634       | 1991.951976    | 996.479626         | Q    | <b>913.528784</b>  | 457.268030      | 896.502235     | 448.754756        | 895.518219         | 448.262748       | 5  |
| 16 | 2109.030955        | 1055.019115       | 2092.004406    | 1046.505841      | 2091.020390    | 1046.013833        | V    | <b>474.303458</b>  | 237.655367      | 457.276909     | 229.142092        | 456.292893         | 228.650084       | 4  |
| 17 | 2196.062983        | 1098.535129       | 2179.036434    | 1090.021855      | 2178.052418    | <b>1089.529847</b> | S    | <b>375.235044</b>  | 188.121160      | 358.208495     | 179.607886        | 357.224479         | 179.115878       | 3  |
| 18 | 2309.147047        | 1155.077161       | 2292.120498    | 1146.563887      | 2291.136482    | 1146.071879        | L    | 288.203016         | 144.605146      | 271.176467     | 136.091872        |                    |                  | 2  |
| 19 |                    |                   |                |                  |                |                    | R    | <b>175.118952</b>  | 88.063114       | 158.092403     | 79.549839         |                    |                  | 1  |

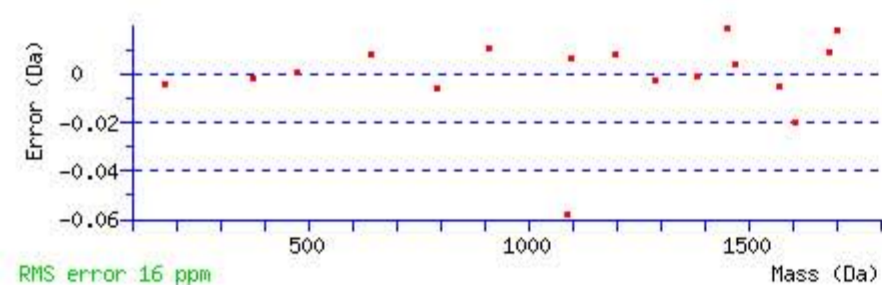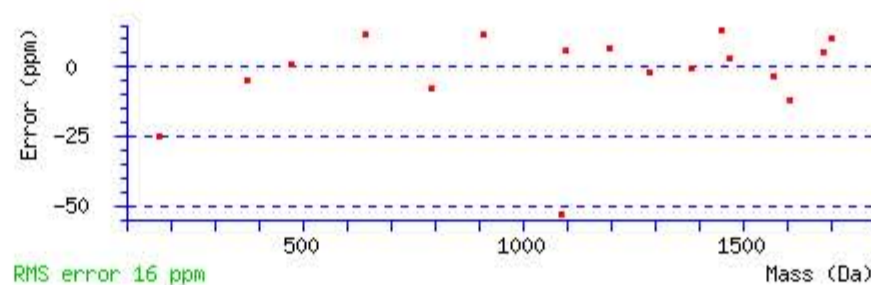

NCBI BLAST search of **VVGGCVAHPHSWPWQVSLR**

(Parameters: blastp, nr protein database, expect=20000, no filter, PAM30)

Other BLAST [web gateways](#)

All matches to this query

| Score | Mr(calc):   | Delta    | Sequence                                |
|-------|-------------|----------|-----------------------------------------|
| 35.6  | 2482.251480 | 0.003136 | <a href="#">VVGGCVAHPHSWPWQVSLR</a>     |
| 1.8   | 2482.232178 | 0.022438 | <a href="#">SFCAAVLQGASFVRLGGRSCSPR</a> |

# Mascot Search Results

## Peptide View

MS/MS Fragmentation of **VILGAHQEVNLEPHVQEIIVSR**

Found in **PLMN\_HUMAN**, Plasminogen OS=Homo sapiens GN=PLG PE=1 SV=2

Match to Query 51626: 2806.488416 from(702.629380,4+) rtinseconds(2109) index(61151)

Title: Locus:1.1.1.1646.6 File:"2013-07-02 CLN FXIII 180 min 3rd FT.wiff"

Data file C:\Program Files (x86)\Matrix Science\Mascot Daemon\mgf9 FXIII 180 min 3rd\mascot\_daemon\_merge.mgf

Click mouse within plot area to zoom in by factor of two about that point

Or, Plot from  to  Da

Label all possible matches  Label matches used for scoring

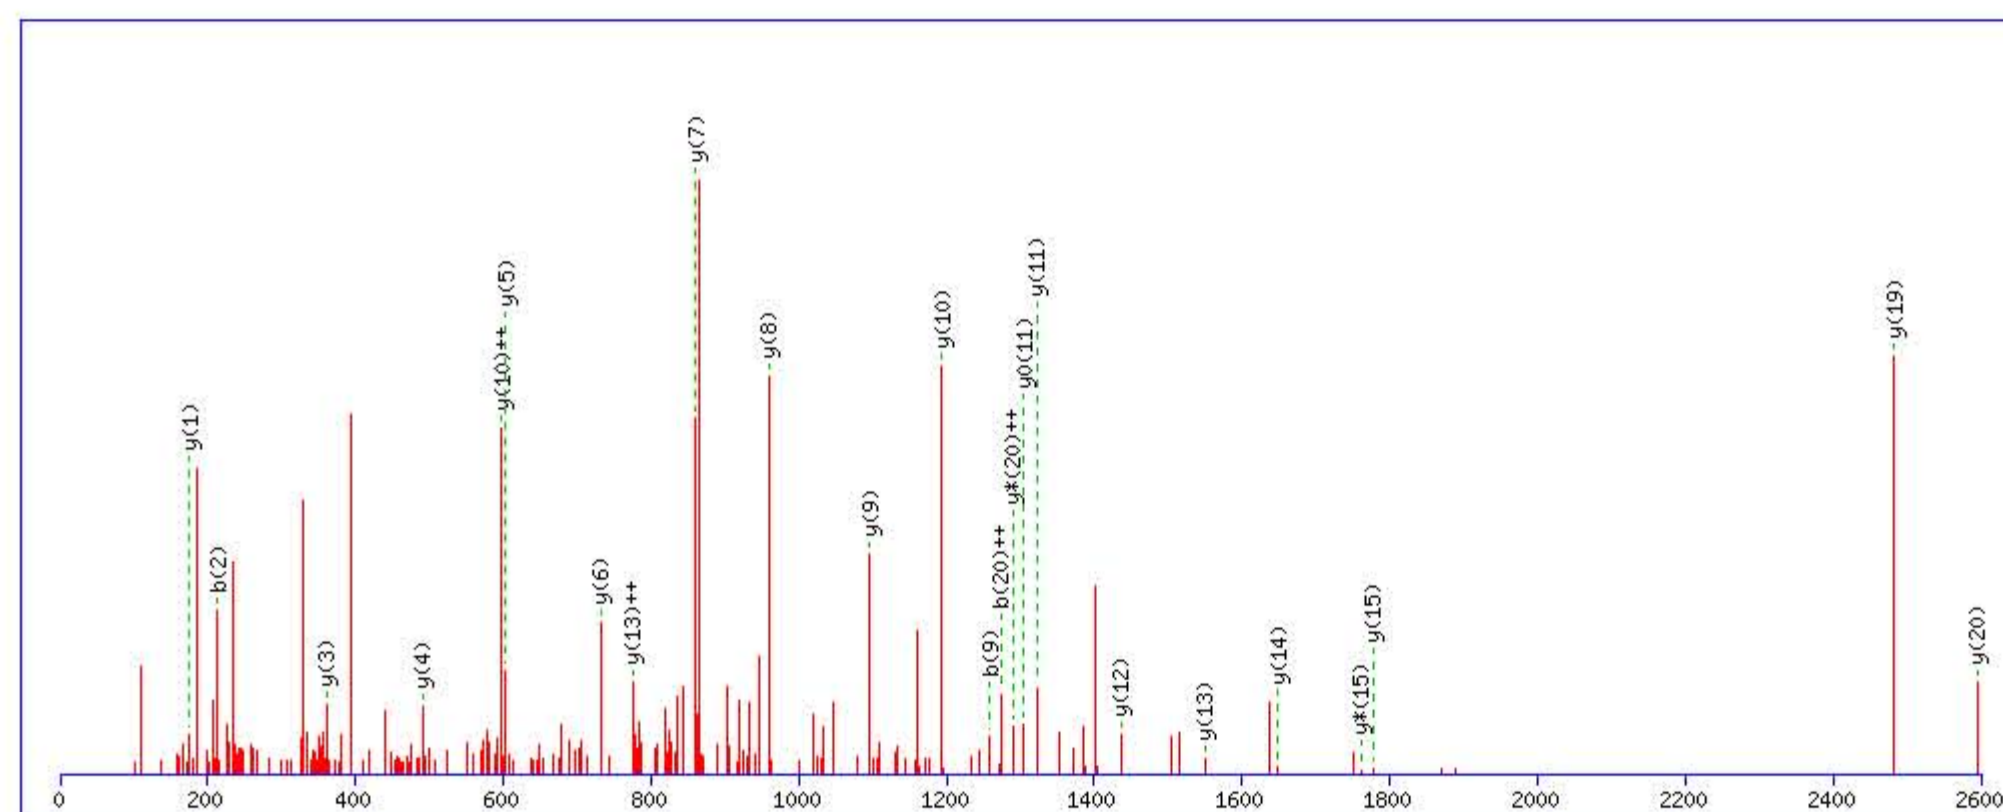

Monoisotopic mass of neutral peptide Mr(calc): 2806.479965

Fixed modifications: Carbamidomethyl (C) (apply to specified residues or termini only)

Variable modifications:

Q7 : Biotin:Thermo-21345 (Q)

Ions Score: 84 Expect: 8.2e-008

Matches : 24/224 fragment ions using 55 most intense peaks [\(help\)](#)

| #  | b                  | b <sup>++</sup>    | b <sup>*</sup> | b <sup>*++</sup> | b <sup>0</sup> | b <sup>0++</sup> | Seq. | y                  | y <sup>++</sup>   | y <sup>*</sup>     | y <sup>*++</sup>   | y <sup>0</sup>     | y <sup>0++</sup> | #  |
|----|--------------------|--------------------|----------------|------------------|----------------|------------------|------|--------------------|-------------------|--------------------|--------------------|--------------------|------------------|----|
| 1  | 100.075690         | 50.541483          |                |                  |                |                  | V    |                    |                   |                    |                    |                    |                  | 22 |
| 2  | <b>213.159754</b>  | 107.083515         |                |                  |                |                  | I    | 2708.418847        | 1354.713061       | 2691.392298        | 1346.199787        | 2690.408282        | 1345.707779      | 21 |
| 3  | 326.243818         | 163.625547         |                |                  |                |                  | L    | <b>2595.334783</b> | 1298.171029       | 2578.308234        | <b>1289.657755</b> | 2577.324218        | 1289.165747      | 20 |
| 4  | 383.265282         | 192.136279         |                |                  |                |                  | G    | <b>2482.250719</b> | 1241.628997       | 2465.224170        | 1233.115723        | 2464.240154        | 1232.623715      | 19 |
| 5  | 454.302396         | 227.654836         |                |                  |                |                  | A    | 2425.229255        | 1213.118265       | 2408.202706        | 1204.604991        | 2407.218690        | 1204.112983      | 18 |
| 6  | 591.361308         | 296.184292         |                |                  |                |                  | H    | 2354.192141        | 1177.599708       | 2337.165592        | 1169.086434        | 2336.181576        | 1168.594426      | 17 |
| 7  | 1030.586634        | 515.796955         | 1013.560085    | 507.283681       |                |                  | Q    | 2217.133229        | 1109.070252       | 2200.106680        | 1100.556978        | 2199.122664        | 1100.064970      | 16 |
| 8  | 1159.629227        | 580.318252         | 1142.602678    | 571.804977       | 1141.618662    | 571.312969       | E    | <b>1777.907903</b> | 889.457590        | <b>1760.881354</b> | 880.944315         | 1759.897338        | 880.452307       | 15 |
| 9  | <b>1258.697641</b> | 629.852459         | 1241.671092    | 621.339184       | 1240.687076    | 620.847176       | V    | <b>1648.865310</b> | 824.936293        | 1631.838761        | 816.423019         | 1630.854745        | 815.931011       | 14 |
| 10 | 1372.740568        | 686.873922         | 1355.714019    | 678.360648       | 1354.730003    | 677.868640       | N    | <b>1549.796896</b> | <b>775.402086</b> | 1532.770347        | 766.888812         | 1531.786331        | 766.396804       | 13 |
| 11 | 1485.824632        | 743.415954         | 1468.798083    | 734.902680       | 1467.814067    | 734.410672       | L    | <b>1435.753969</b> | 718.380623        | 1418.727420        | 709.867348         | 1417.743404        | 709.375340       | 12 |
| 12 | 1614.867225        | 807.937251         | 1597.840676    | 799.423976       | 1596.856660    | 798.931968       | E    | <b>1322.669905</b> | 661.838591        | 1305.643356        | 653.325316         | <b>1304.659340</b> | 652.833308       | 11 |
| 13 | 1711.919989        | 856.463633         | 1694.893440    | 847.950358       | 1693.909424    | 847.458350       | P    | <b>1193.627312</b> | <b>597.317294</b> | 1176.600763        | 588.804020         | 1175.616747        | 588.312012       | 10 |
| 14 | 1848.978901        | 924.993089         | 1831.952352    | 916.479814       | 1830.968336    | 915.987806       | H    | <b>1096.574548</b> | 548.790912        | 1079.547999        | 540.277638         | 1078.563983        | 539.785630       | 9  |
| 15 | 1948.047315        | 974.527296         | 1931.020766    | 966.014021       | 1930.036750    | 965.522013       | V    | <b>959.515636</b>  | 480.261456        | 942.489087         | 471.748182         | 941.505071         | 471.256174       | 8  |
| 16 | 2076.105893        | 1038.556584        | 2059.079344    | 1030.043310      | 2058.095328    | 1029.551302      | Q    | <b>860.447222</b>  | 430.727249        | 843.420673         | 422.213975         | 842.436657         | 421.721967       | 7  |
| 17 | 2205.148486        | 1103.077881        | 2188.121937    | 1094.564606      | 2187.137921    | 1094.072598      | E    | <b>732.388644</b>  | 366.697960        | 715.362095         | 358.184686         | 714.378079         | 357.692678       | 6  |
| 18 | 2318.232550        | 1159.619913        | 2301.206001    | 1151.106638      | 2300.221985    | 1150.614631      | I    | <b>603.346051</b>  | 302.176664        | 586.319502         | 293.663389         | 585.335486         | 293.171381       | 5  |
| 19 | 2447.275143        | 1224.141210        | 2430.248594    | 1215.627935      | 2429.264578    | 1215.135927      | E    | <b>490.261987</b>  | 245.634631        | 473.235438         | 237.121357         | 472.251422         | 236.629349       | 4  |
| 20 | 2546.343557        | <b>1273.675417</b> | 2529.317008    | 1265.162142      | 2528.332992    | 1264.670134      | V    | <b>361.219394</b>  | 181.113335        | 344.192845         | 172.600060         | 343.208829         | 172.108052       | 3  |
| 21 | 2633.375585        | 1317.191431        | 2616.349036    | 1308.678156      | 2615.365020    | 1308.186148      | S    | 262.150980         | 131.579128        | 245.124431         | 123.065854         | 244.140415         | 122.573846       | 2  |
| 22 |                    |                    |                |                  |                |                  | R    | <b>175.118952</b>  | 88.063114         | 158.092403         | 79.549839          |                    |                  | 1  |

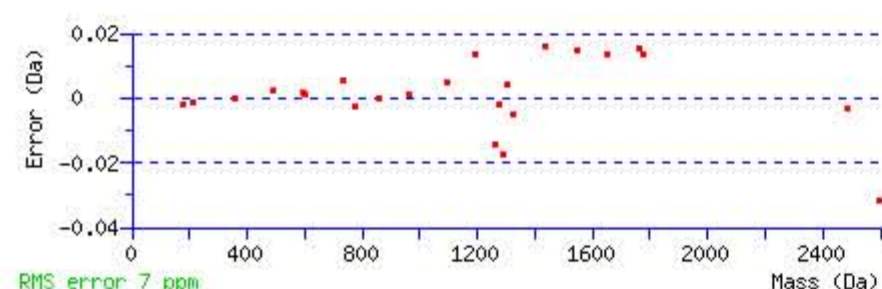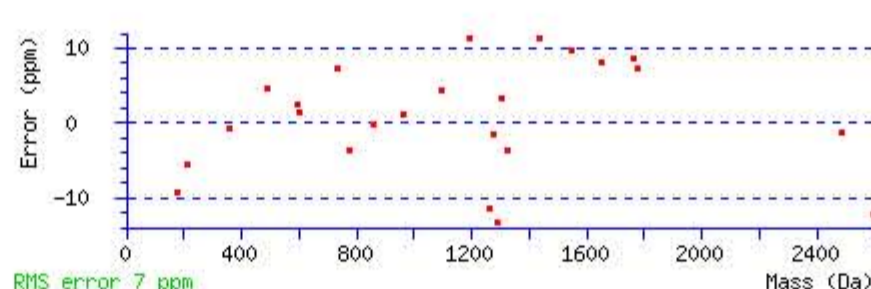

NCBI BLAST search of [VILGAHQEVNLEPHVQEIIVSR](#)

(Parameters: blastp, nr protein database, expect=20000, no filter, PAM30)

Other BLAST [web gateways](#)

All matches to this query

| Score | Mr(calc):   | Delta    | Sequence                               |
|-------|-------------|----------|----------------------------------------|
| 84.0  | 2806.479965 | 0.008451 | <a href="#">VILGAHQEVNLEPHVQEIIVSR</a> |
| 12.0  | 2806.479965 | 0.008451 | <a href="#">VILGAHQEVNLEPHVQEIIVSR</a> |



# MASCOT Search Results

## Peptide View

MS/MS Fragmentation of **VILGAHQEVNLEPHVQEIEVSR**  
 Found in **PLMN\_HUMAN**, Plasminogen OS=Homo sapiens GN=PLG PE=1 SV=2

Match to Query 51628: 2806.491132 from(936.504320,3+) rtinseconds(2068) index(60951)  
 Title: Locus:1.1.1.1631.15 File:"2013-07-02 CLN FXIII 180 min 3rd FT.wiff"  
 Data file C:\Program Files (x86)\Matrix Science\Mascot Daemon\mgf9 FXIII 180 min 3rd\mascot\_daemon\_merge.mgf

Click mouse within plot area to zoom in by factor of two about that point  
 Or, Plot from  to  Da   
 Label all possible matches  Label matches used for scoring

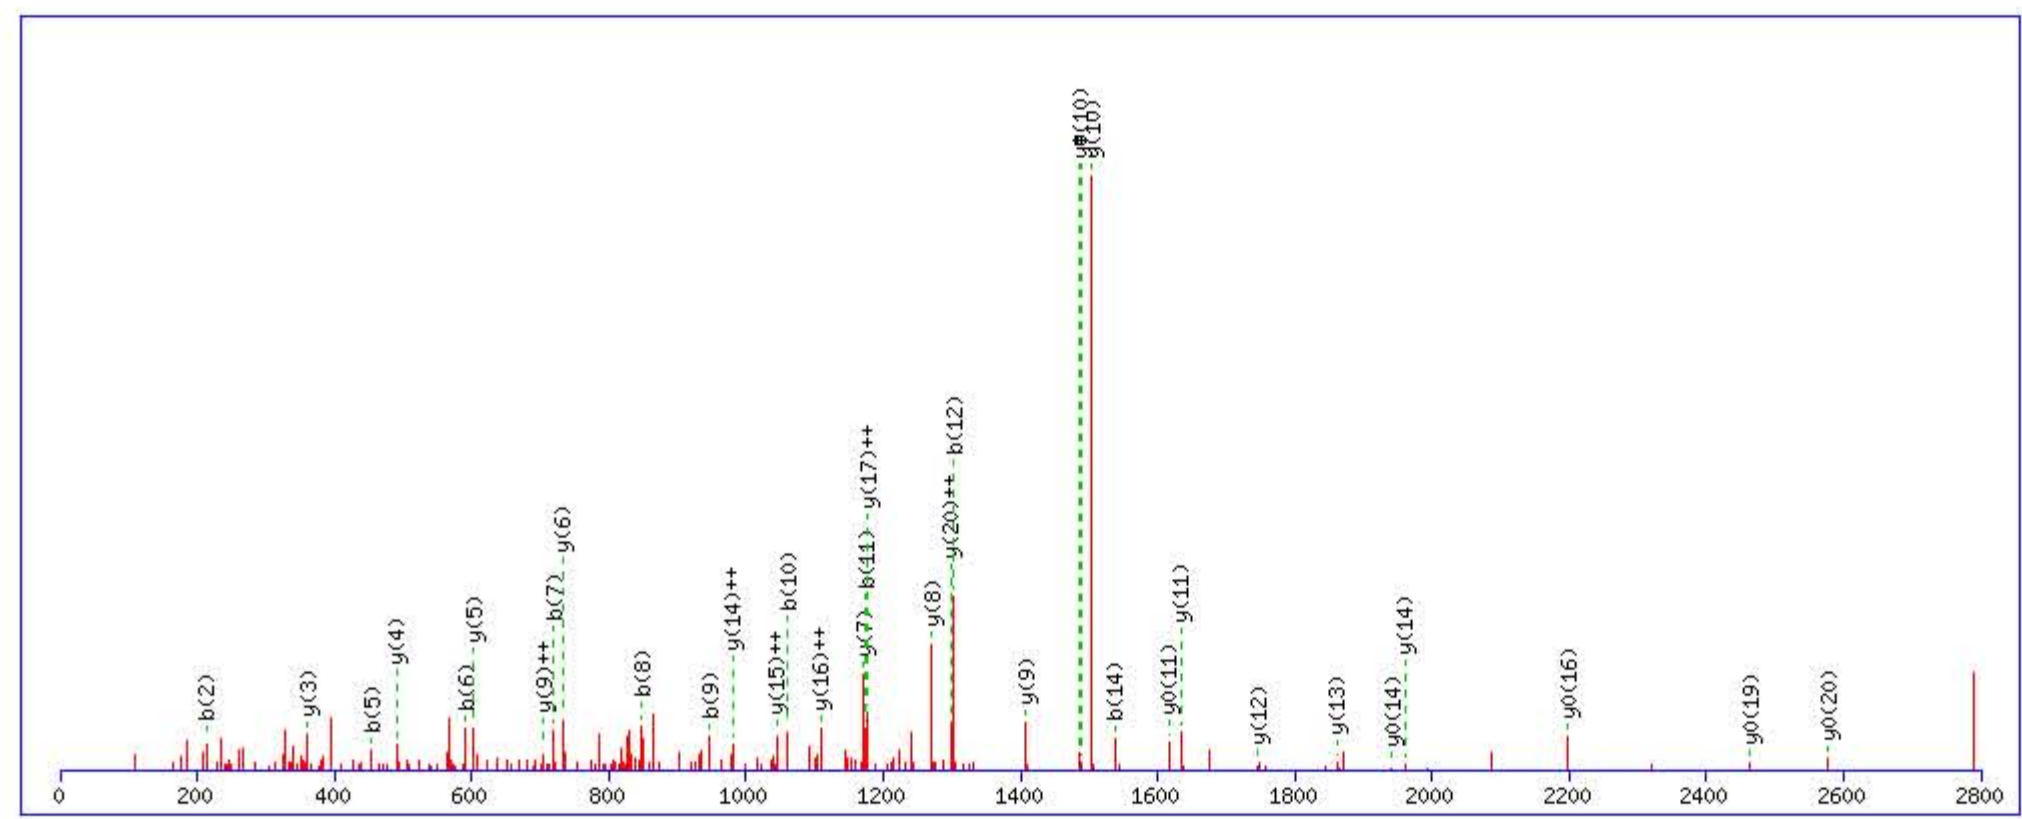

Monoisotopic mass of neutral peptide Mr(calc): 2806.479965  
 Fixed modifications: Carbamidomethyl (C) (apply to specified residues or termini only)  
 Variable modifications:  
 Q16 : Biotin:Thermo-21345 (Q)  
 Ions Score: 73 Expect: 1.6e-007  
 Matches : 35/224 fragment ions using 62 most intense peaks [\(help\)](#)

| #  | b                  | b <sup>++</sup> | b <sup>*</sup> | b <sup>***</sup> | b <sup>0</sup> | b <sup>0++</sup> | Seq. | y                  | y <sup>++</sup>    | y <sup>*</sup>     | y <sup>***</sup> | y <sup>0</sup>     | y <sup>0++</sup> | #  |
|----|--------------------|-----------------|----------------|------------------|----------------|------------------|------|--------------------|--------------------|--------------------|------------------|--------------------|------------------|----|
| 1  | 100.075690         | 50.541483       |                |                  |                |                  | V    |                    |                    |                    |                  |                    |                  | 22 |
| 2  | <b>213.159754</b>  | 107.083515      |                |                  |                |                  | I    | 2708.418847        | 1354.713061        | 2691.392298        | 1346.199787      | 2690.408282        | 1345.707779      | 21 |
| 3  | 326.243818         | 163.625547      |                |                  |                |                  | L    | 2595.334783        | <b>1298.171029</b> | 2578.308234        | 1289.657755      | <b>2577.324218</b> | 1289.165747      | 20 |
| 4  | 383.265282         | 192.136279      |                |                  |                |                  | G    | 2482.250719        | 1241.628997        | 2465.224170        | 1233.115723      | <b>2464.240154</b> | 1232.623715      | 19 |
| 5  | <b>454.302396</b>  | 227.654836      |                |                  |                |                  | A    | 2425.229255        | 1213.118265        | 2408.202706        | 1204.604991      | 2407.218690        | 1204.112983      | 18 |
| 6  | <b>591.361308</b>  | 296.184292      |                |                  |                |                  | H    | 2354.192141        | <b>1177.599708</b> | 2337.165592        | 1169.086434      | 2336.181576        | 1168.594426      | 17 |
| 7  | <b>719.419886</b>  | 360.213581      | 702.393337     | 351.700307       |                |                  | Q    | 2217.133229        | <b>1109.070252</b> | 2200.106680        | 1100.556978      | <b>2199.122664</b> | 1100.064970      | 16 |
| 8  | <b>848.462479</b>  | 424.734878      | 831.435930     | 416.221603       | 830.451914     | 415.729595       | E    | 2089.074651        | <b>1045.040963</b> | 2072.048102        | 1036.527689      | 2071.064086        | 1036.035681      | 15 |
| 9  | <b>947.530893</b>  | 474.269085      | 930.504344     | 465.755810       | 929.520328     | 465.263802       | V    | <b>1960.032058</b> | <b>980.519667</b>  | 1943.005509        | 972.006393       | <b>1942.021493</b> | 971.514385       | 14 |
| 10 | <b>1061.573820</b> | 531.290548      | 1044.547271    | 522.777274       | 1043.563255    | 522.285266       | N    | <b>1860.963644</b> | 930.985460         | 1843.937095        | 922.472186       | 1842.953079        | 921.980178       | 13 |
| 11 | <b>1174.657884</b> | 587.832580      | 1157.631335    | 579.319306       | 1156.647319    | 578.827297       | L    | <b>1746.920717</b> | 873.963997         | 1729.894168        | 865.450722       | 1728.910152        | 864.958714       | 12 |
| 12 | <b>1303.700477</b> | 652.353877      | 1286.673928    | 643.840602       | 1285.689912    | 643.348594       | E    | <b>1633.836653</b> | 817.421965         | 1616.810104        | 808.908690       | <b>1615.826088</b> | 808.416682       | 11 |
| 13 | 1400.753241        | 700.880259      | 1383.726692    | 692.366984       | 1382.742676    | 691.874976       | P    | <b>1504.794060</b> | 752.900668         | <b>1487.767511</b> | 744.387394       | <b>1486.783495</b> | 743.895386       | 10 |
| 14 | <b>1537.812153</b> | 769.409715      | 1520.785604    | 760.896440       | 1519.801588    | 760.404432       | H    | <b>1407.741296</b> | <b>704.374286</b>  | 1390.714747        | 695.861012       | 1389.730731        | 695.369004       | 9  |
| 15 | 1636.880567        | 818.943922      | 1619.854018    | 810.430647       | 1618.870002    | 809.938639       | V    | <b>1270.682384</b> | 635.844830         | 1253.655835        | 627.331556       | 1252.671819        | 626.839548       | 8  |
| 16 | 2076.105893        | 1038.556584     | 2059.079344    | 1030.043310      | 2058.095328    | 1029.551302      | Q    | <b>1171.613970</b> | 586.310623         | 1154.587421        | 577.797349       | 1153.603405        | 577.305341       | 7  |
| 17 | 2205.148486        | 1103.077881     | 2188.121937    | 1094.564606      | 2187.137921    | 1094.072598      | E    | <b>732.388644</b>  | 366.697960         | 715.362095         | 358.184686       | 714.378079         | 357.692678       | 6  |
| 18 | 2318.232550        | 1159.619913     | 2301.206001    | 1151.106638      | 2300.221985    | 1150.614631      | I    | <b>603.346051</b>  | 302.176664         | 586.319502         | 293.663389       | 585.335486         | 293.171381       | 5  |
| 19 | 2447.275143        | 1224.141210     | 2430.248594    | 1215.627935      | 2429.264578    | 1215.135927      | E    | <b>490.261987</b>  | 245.634631         | 473.235438         | 237.121357       | 472.251422         | 236.629349       | 4  |
| 20 | 2546.343557        | 1273.675417     | 2529.317008    | 1265.162142      | 2528.332992    | 1264.670134      | V    | <b>361.219394</b>  | 181.113335         | 344.192845         | 172.600060       | 343.208829         | 172.108052       | 3  |
| 21 | 2633.375585        | 1317.191431     | 2616.349036    | 1308.678156      | 2615.365020    | 1308.186148      | S    | 262.150980         | 131.579128         | 245.124431         | 123.065854       | 244.140415         | 122.573846       | 2  |
| 22 |                    |                 |                |                  |                |                  | R    | 175.118952         | 88.063114          | 158.092403         | 79.549839        |                    |                  | 1  |

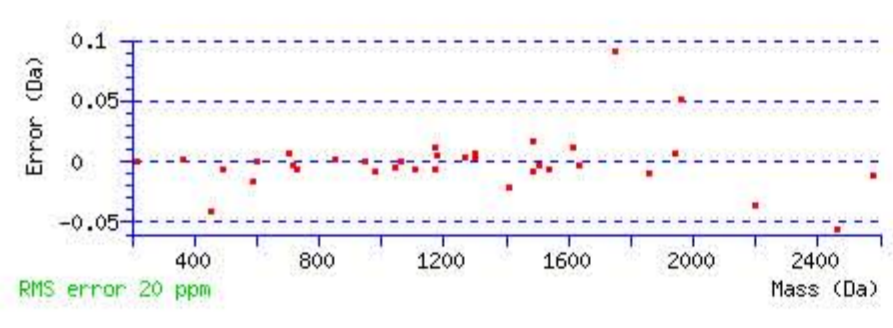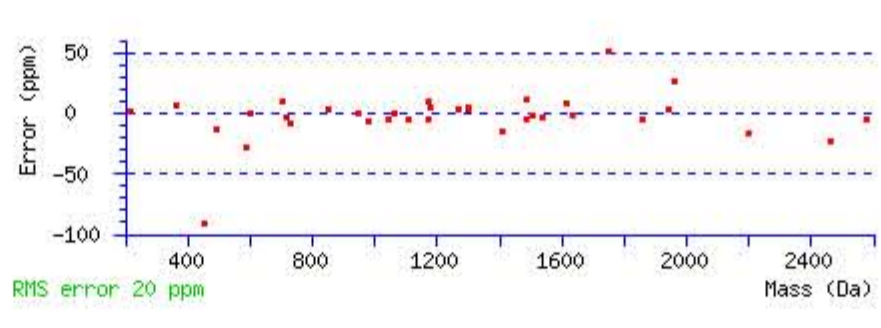

NCBI BLAST search of **VILGAHQEVNLEPHVQEIEVSR**  
 (Parameters: blastp, nr protein database, expect=20000, no filter, PAM30)  
 Other BLAST [web gateways](#)

### All matches to this query

| Score | Mr(calc):   | Delta    | Sequence                                 |
|-------|-------------|----------|------------------------------------------|
| 72.7  | 2806.479965 | 0.011167 | <a href="#">VILGAHQEVNLEPHVQEIEVSR</a>   |
| 0.1   | 2806.476791 | 0.014341 | <a href="#">LYLYAAHDVTFIPLMLTLGIFDHK</a> |

# MASCOT Search Results

## Peptide View

MS/MS Fragmentation of **TMSGLECAWDSQSPHAHGYIPSK**  
 Found in **PLMN\_HUMAN**, Plasminogen OS=Homo sapiens GN=PLG PE=1 SV=2

Match to Query 54098: 3013.365016 from(754.348530,4+) rtinseconds(1872) index(59739)  
 Title: Locus:1.1.1.1563.9 File:"2013-07-02 CLN FXIII 180 min 3rd FT.wiff"  
 Data file C:\Program Files (x86)\Matrix Science\Mascot Daemon\mgf\9 FXIII 180 min 3rd\mascot\_daemon\_merge.mgf

Click mouse within plot area to zoom in by factor of two about that point  
 Or, Plot from  to  Da   
 Label all possible matches  Label matches used for scoring

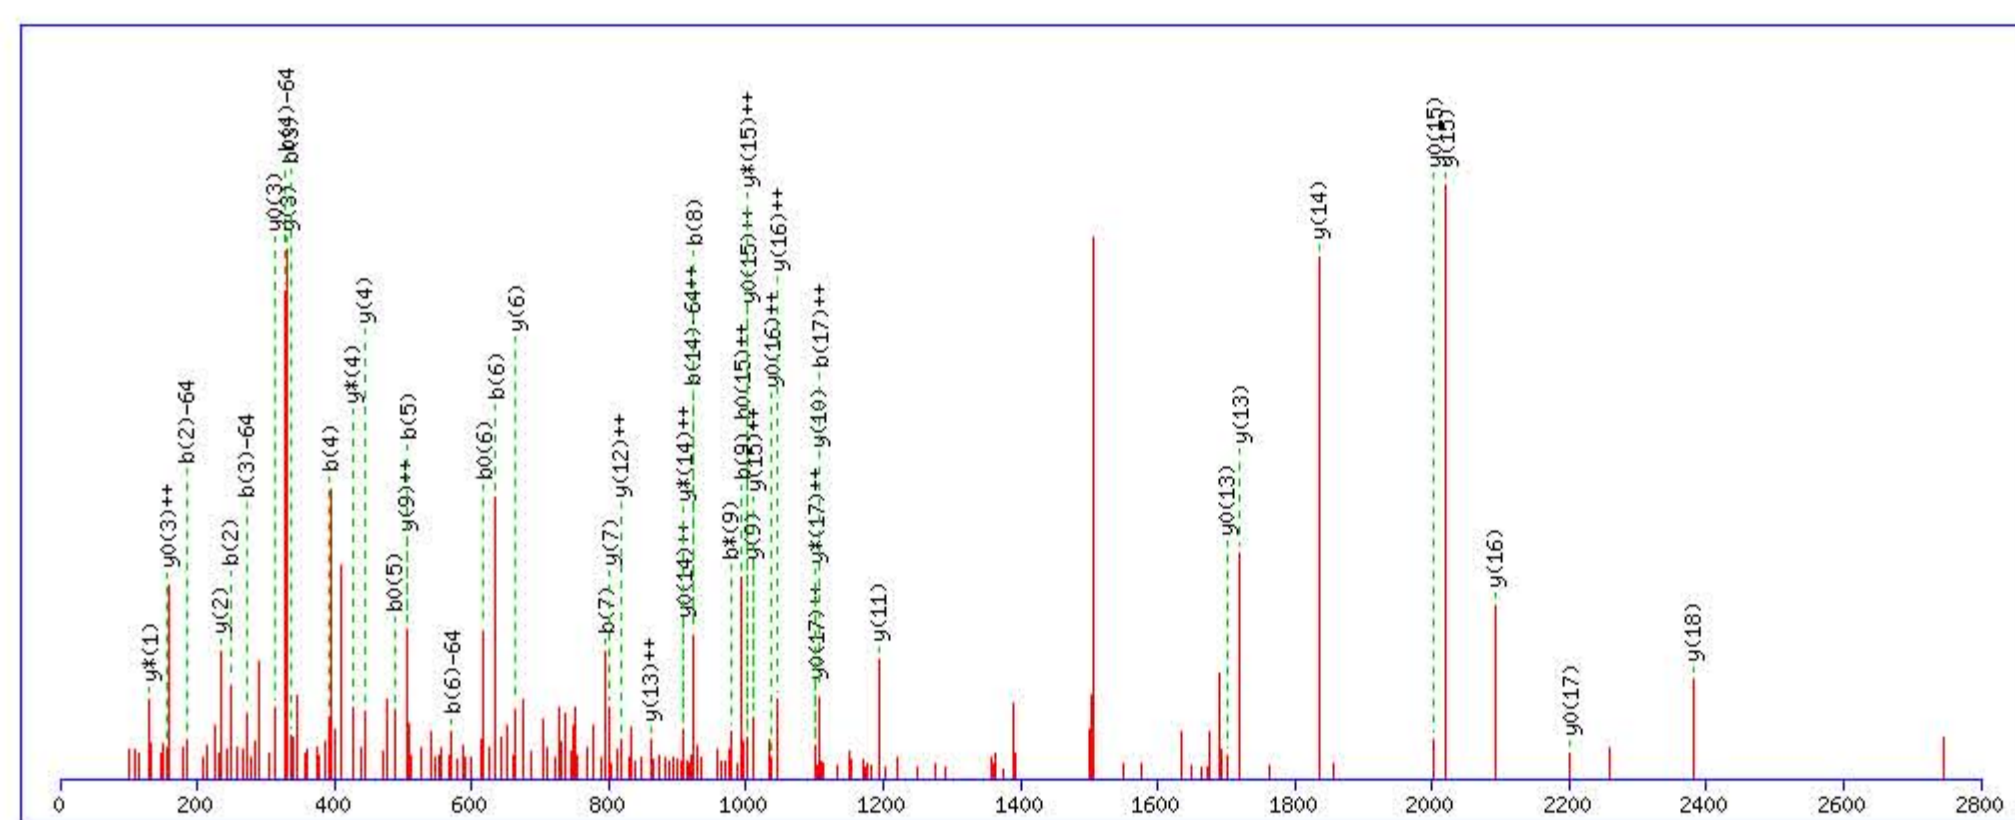

Monoisotopic mass of neutral peptide Mr(calc): 3013.352081  
 Fixed modifications: Carbamidomethyl (C) (apply to specified residues or termini only)  
 Variable modifications:  
 M2 : Oxidation (M), with neutral losses 0.000000 (shown in table), 63.998285  
 Q13 : Biotin:Thermo-21345 (Q)  
 Ions Score: 46 Expect: 0.0003  
 Matches : 50/386 fragment ions using 129 most intense peaks [\(help\)](#)

| #  | b                 | b <sup>++</sup>    | b <sup>+</sup>    | b <sup>+++</sup> | b <sup>0</sup>    | b <sup>0++</sup>  | Seq. | y                  | y <sup>++</sup>    | y <sup>+</sup>    | y <sup>+++</sup>   | y <sup>0</sup>     | y <sup>0++</sup>   | #  |
|----|-------------------|--------------------|-------------------|------------------|-------------------|-------------------|------|--------------------|--------------------|-------------------|--------------------|--------------------|--------------------|----|
| 1  | 102.054955        | 51.531116          |                   |                  | 84.044390         | 42.525833         | T    |                    |                    |                   |                    |                    |                    | 24 |
| 2  | <b>249.090355</b> | 125.048815         |                   |                  | 231.079790        | 116.043533        | M    | 2913.311683        | 1457.159480        | 2896.285134       | 1448.646205        | 2895.301118        | 1448.154197        | 23 |
| 3  | <b>336.122383</b> | 168.564829         |                   |                  | 318.111818        | 159.559547        | S    | 2766.276283        | 1383.641780        | 2749.249734       | 1375.128505        | 2748.265718        | 1374.636497        | 22 |
| 4  | <b>393.143847</b> | 197.075561         |                   |                  | 375.133282        | 188.070279        | G    | 2679.244255        | 1340.125765        | 2662.217706       | 1331.612491        | 2661.233690        | 1331.120483        | 21 |
| 5  | <b>506.227911</b> | 253.617593         |                   |                  | <b>488.217346</b> | 244.612311        | L    | 2622.222791        | 1311.615034        | 2605.196242       | 1303.101759        | 2604.212226        | 1302.609751        | 20 |
| 6  | <b>635.270504</b> | 318.138890         |                   |                  | <b>617.259939</b> | 309.133608        | E    | 2509.138727        | 1255.073001        | 2492.112178       | 1246.559727        | 2491.128162        | 1246.067719        | 19 |
| 7  | <b>795.301153</b> | 398.154215         |                   |                  | 777.290588        | 389.148932        | C    | <b>2380.096134</b> | 1190.551705        | 2363.069585       | 1182.038430        | 2362.085569        | 1181.546422        | 18 |
| 8  | <b>923.359731</b> | 462.183504         | 906.333182        | 453.670229       | 905.349166        | 453.178221        | Q    | 2220.065485        | 1110.536381        | 2203.038936       | <b>1102.023106</b> | <b>2202.054920</b> | <b>1101.531098</b> | 17 |
| 9  | <b>994.396845</b> | 497.702061         | <b>977.370296</b> | 489.188786       | 976.386280        | 488.696778        | A    | <b>2092.006907</b> | <b>1046.507091</b> | 2074.980358       | 1037.993817        | 2073.996342        | <b>1037.501809</b> | 16 |
| 10 | 1180.476158       | 590.741717         | 1163.449609       | 582.228443       | 1162.465593       | 581.736435        | W    | <b>2020.969793</b> | <b>1010.988535</b> | 2003.943244       | <b>1002.475260</b> | <b>2002.959228</b> | <b>1001.983252</b> | 15 |
| 11 | 1295.503101       | 648.255189         | 1278.476552       | 639.741914       | 1277.492536       | 639.249906        | D    | <b>1834.890480</b> | 917.948878         | 1817.863931       | <b>909.435604</b>  | 1816.879915        | <b>908.943596</b>  | 14 |
| 12 | 1382.535129       | 691.771203         | 1365.508580       | 683.257928       | 1364.524564       | 682.765920        | S    | <b>1719.863537</b> | <b>860.435407</b>  | 1702.836988       | 851.922132         | <b>1701.852972</b> | 851.430124         | 13 |
| 13 | 1821.760455       | 911.383866         | 1804.733906       | 902.870591       | 1803.749890       | 902.378583        | Q    | 1632.831509        | <b>816.919393</b>  | 1615.804960       | 808.406118         | 1614.820944        | 807.914110         | 12 |
| 14 | 1908.792483       | 954.899880         | 1891.765934       | 946.386605       | 1890.781918       | 945.894597        | S    | <b>1193.606183</b> | 597.306730         | 1176.579634       | 588.793455         | 1175.595618        | 588.301447         | 11 |
| 15 | 2005.845247       | 1003.426262        | 1988.818698       | 994.912987       | 1987.834682       | <b>994.420979</b> | P    | <b>1106.574155</b> | 553.790716         | 1089.547606       | 545.277441         | 1088.563590        | 544.785433         | 10 |
| 16 | 2142.904159       | 1071.955718        | 2125.877610       | 1063.442443      | 2124.893594       | 1062.950435       | H    | <b>1009.521391</b> | <b>505.264334</b>  | 992.494842        | 496.751059         | 991.510826         | 496.259051         | 9  |
| 17 | 2213.941273       | <b>1107.474275</b> | 2196.914724       | 1098.961000      | 2195.930708       | 1098.468992       | A    | 872.462479         | 436.734878         | 855.435930        | 428.221603         | 854.451914         | 427.729595         | 8  |
| 18 | 2351.000185       | 1176.003731        | 2333.973636       | 1167.490456      | 2332.989620       | 1166.998448       | H    | <b>801.425365</b>  | 401.216321         | 784.398816        | 392.703046         | 783.414800         | 392.211038         | 7  |
| 19 | 2408.021649       | 1204.514463        | 2390.995100       | 1196.001188      | 2390.011084       | 1195.509180       | G    | <b>664.366453</b>  | 332.686865         | 647.339904        | 324.173590         | 646.355888         | 323.681582         | 6  |
| 20 | 2571.084978       | 1286.046127        | 2554.058429       | 1277.532853      | 2553.074413       | 1277.040845       | Y    | 607.344989         | 304.176133         | 590.318440        | 295.662858         | 589.334424         | 295.170850         | 5  |
| 21 | 2684.169042       | 1342.588159        | 2667.142493       | 1334.074885      | 2666.158477       | 1333.582877       | I    | <b>444.281660</b>  | 222.644468         | <b>427.255111</b> | 214.131194         | 426.271095         | 213.639186         | 4  |
| 22 | 2781.221806       | 1391.114541        | 2764.195257       | 1382.601267      | 2763.211241       | 1382.109259       | P    | <b>331.197596</b>  | 166.102436         | 314.171047        | 157.589162         | <b>313.187031</b>  | <b>157.097154</b>  | 3  |
| 23 | 2868.253834       | 1434.630555        | 2851.227285       | 1426.117281      | 2850.243269       | 1425.625273       | S    | <b>234.144832</b>  | 117.576054         | 217.118283        | 109.062780         | 216.134267         | 108.570772         | 2  |
| 24 |                   |                    |                   |                  |                   |                   | K    | 147.112804         | 74.060040          | <b>130.086255</b> | 65.546765          |                    |                    | 1  |

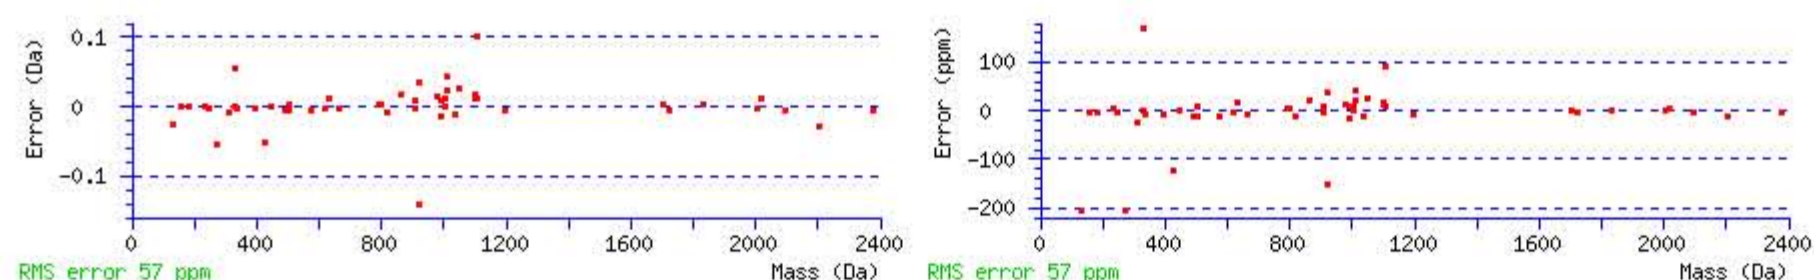

NCBI BLAST search of **TMSGLECAWDSQSPHAHGYIPSK**  
 (Parameters: blastp, nr protein database, expect=20000, no filter, PAM30)  
 Other BLAST [web gateways](#)

### All matches to this query

| Score | Mr(calc):   | Delta    | Sequence                                |
|-------|-------------|----------|-----------------------------------------|
| 45.8  | 3013.352081 | 0.012935 | <a href="#">TMSGLECAWDSQSPHAHGYIPSK</a> |
| 18.0  | 3013.352081 | 0.012935 | <a href="#">TMSGLECAWDSQSPHAHGYIPSK</a> |

# Mascot Search Results

## Peptide View

MS/MS Fragmentation of **GNVAVTVSGHTCQHWSAQTPHTHNR**  
 Found in **PLMN\_HUMAN**, Plasminogen OS=Homo sapiens GN=PLG PE=1 SV=2

Match to Query 54684: 3092.452770 from(619.497830,5+) rtinseconds(1437) index(57574)  
 Title: Locus:1.1.1.1411.15 File:"2013-07-02 CLN FXIII 180 min 3rd FT.wiff"  
 Data file C:\Program Files (x86)\Matrix Science\Mascot Daemon\mgf\9 FXIII 180 min 3rd\mascot\_daemon\_merge.mgf

Click mouse within plot area to zoom in by factor of two about that point  
 Or, Plot from  to  Da   
 Label all possible matches  Label matches used for scoring

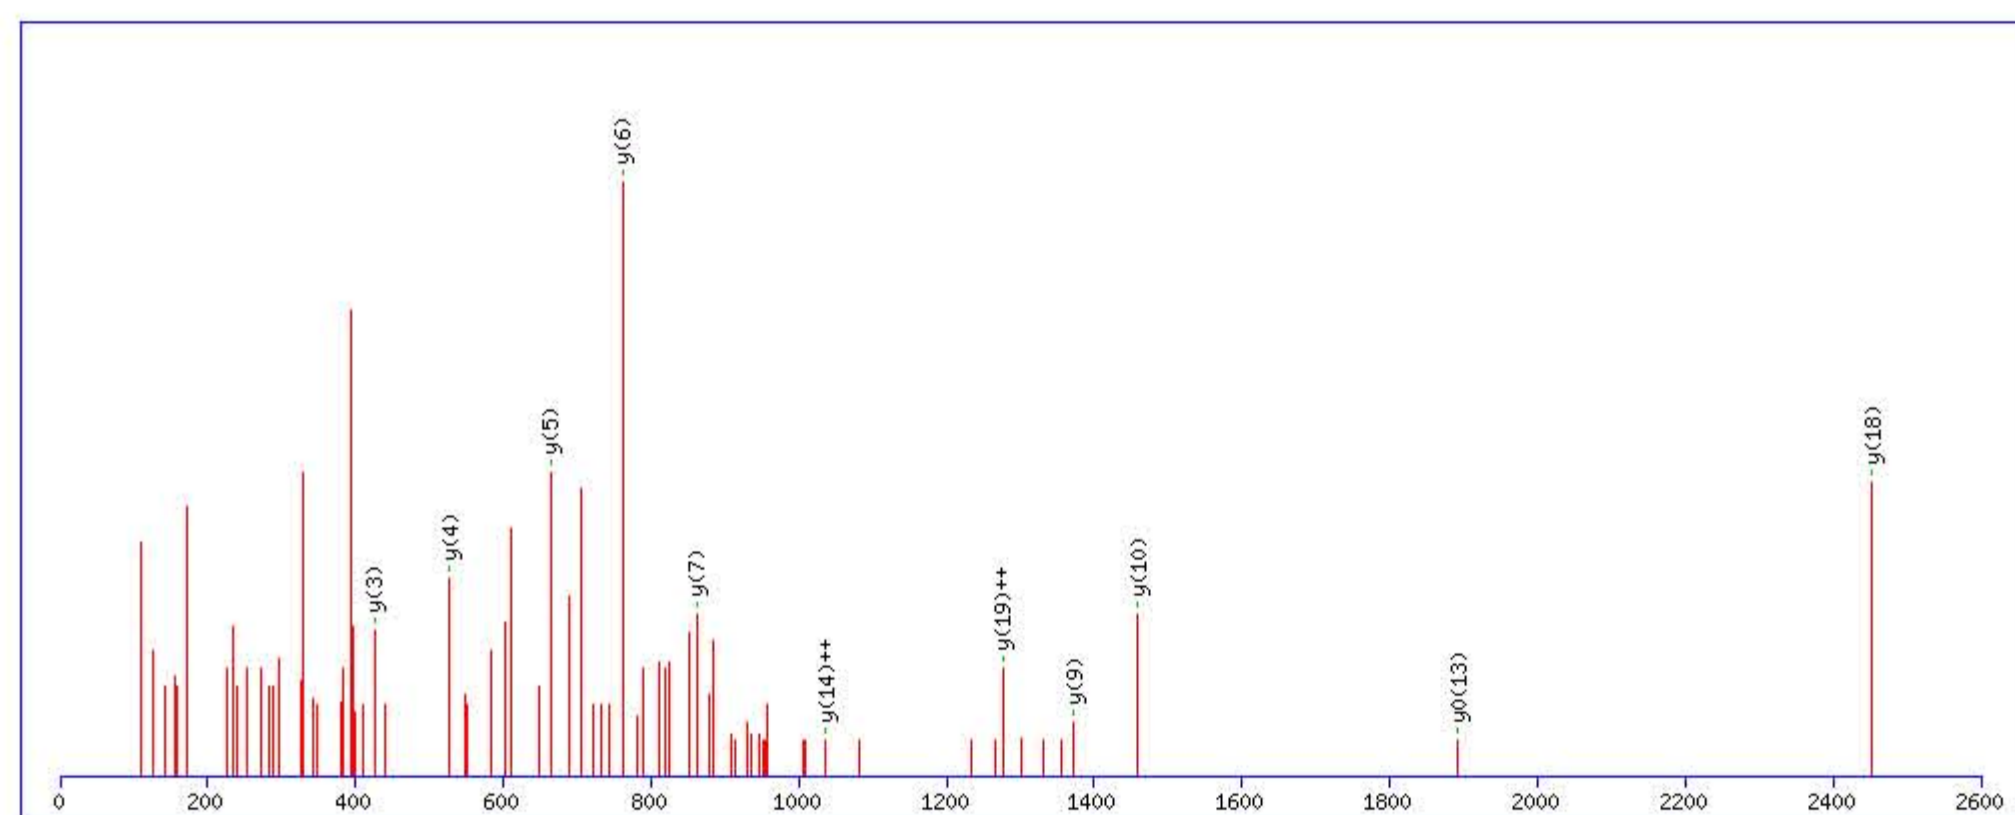

Monoisotopic mass of neutral peptide Mr(calc): 3092.457016  
 Fixed modifications: Carbamidomethyl (C) (apply to specified residues or termini only)  
 Variable modifications:  
 Q18 : Biotin:Thermo-21345 (Q)  
 Ions Score: 50 Expect: 0.0002  
 Matches : 11/270 fragment ions using 15 most intense peaks [\(help\)](#)

| #  | b           | b <sup>++</sup> | b <sup>+</sup> | b <sup>+++</sup> | b <sup>0</sup> | b <sup>0++</sup> | Seq. | y           | y <sup>++</sup> | y <sup>+</sup> | y <sup>+++</sup> | y <sup>0</sup> | y <sup>0++</sup> | #  |
|----|-------------|-----------------|----------------|------------------|----------------|------------------|------|-------------|-----------------|----------------|------------------|----------------|------------------|----|
| 1  | 58.028740   | 29.518008       |                |                  |                |                  | G    |             |                 |                |                  |                |                  | 25 |
| 2  | 172.071667  | 86.539471       | 155.045118     | 78.026197        |                |                  | N    | 3036.442790 | 1518.725033     | 3019.416241    | 1510.211758      | 3018.432225    | 1509.719750      | 24 |
| 3  | 271.140081  | 136.073679      | 254.113532     | 127.560404       |                |                  | V    | 2922.399863 | 1461.703569     | 2905.373314    | 1453.190295      | 2904.389298    | 1452.698287      | 23 |
| 4  | 342.177195  | 171.592236      | 325.150646     | 163.078961       |                |                  | A    | 2823.331449 | 1412.169362     | 2806.304900    | 1403.656088      | 2805.320884    | 1403.164080      | 22 |
| 5  | 441.245609  | 221.126443      | 424.219060     | 212.613168       |                |                  | V    | 2752.294335 | 1376.650805     | 2735.267786    | 1368.137531      | 2734.283770    | 1367.645523      | 21 |
| 6  | 542.293288  | 271.650282      | 525.266739     | 263.137008       | 524.282723     | 262.645000       | T    | 2653.225921 | 1327.116598     | 2636.199372    | 1318.603324      | 2635.215356    | 1318.111316      | 20 |
| 7  | 641.361702  | 321.184489      | 624.335153     | 312.671215       | 623.351137     | 312.179207       | V    | 2552.178242 | 1276.592759     | 2535.151693    | 1268.079484      | 2534.167677    | 1267.587476      | 19 |
| 8  | 728.393730  | 364.700503      | 711.367181     | 356.187229       | 710.383165     | 355.695221       | S    | 2453.109828 | 1227.058552     | 2436.083279    | 1218.545277      | 2435.099263    | 1218.053269      | 18 |
| 9  | 785.415194  | 393.211235      | 768.388645     | 384.697961       | 767.404629     | 384.205953       | G    | 2366.077800 | 1183.542538     | 2349.051251    | 1175.029263      | 2348.067235    | 1174.537255      | 17 |
| 10 | 922.474106  | 461.740691      | 905.447557     | 453.227417       | 904.463541     | 452.735409       | H    | 2309.056336 | 1155.031806     | 2292.029787    | 1146.518531      | 2291.045771    | 1146.026523      | 16 |
| 11 | 1023.521785 | 512.264530      | 1006.495236    | 503.751256       | 1005.511220    | 503.259248       | T    | 2171.997424 | 1086.502350     | 2154.970875    | 1077.989075      | 2153.986859    | 1077.497067      | 15 |
| 12 | 1183.552434 | 592.279855      | 1166.525885    | 583.766581       | 1165.541869    | 583.274572       | C    | 2070.949745 | 1035.978510     | 2053.923196    | 1027.465236      | 2052.939180    | 1026.973228      | 14 |
| 13 | 1311.611012 | 656.309144      | 1294.584463    | 647.795870       | 1293.600447    | 647.303862       | Q    | 1910.919096 | 955.963186      | 1893.892547    | 947.449911       | 1892.908531    | 946.957903       | 13 |
| 14 | 1448.669924 | 724.838600      | 1431.643375    | 716.325326       | 1430.659359    | 715.833318       | H    | 1782.860518 | 891.933897      | 1765.833969    | 883.420622       | 1764.849953    | 882.928614       | 12 |
| 15 | 1634.749237 | 817.878257      | 1617.722688    | 809.364982       | 1616.738672    | 808.872974       | W    | 1645.801606 | 823.404441      | 1628.775057    | 814.891166       | 1627.791041    | 814.399158       | 11 |
| 16 | 1721.781265 | 861.394271      | 1704.754716    | 852.880996       | 1703.770700    | 852.388988       | S    | 1459.722293 | 730.364784      | 1442.695744    | 721.851510       | 1441.711728    | 721.359502       | 10 |
| 17 | 1792.818379 | 896.912828      | 1775.791830    | 888.399553       | 1774.807814    | 887.907545       | A    | 1372.690265 | 686.848770      | 1355.663716    | 678.335496       | 1354.679700    | 677.843488       | 9  |
| 18 | 2232.043705 | 1116.525490     | 2215.017156    | 1108.012216      | 2214.033140    | 1107.520208      | Q    | 1301.653151 | 651.330213      | 1284.626602    | 642.816939       | 1283.642586    | 642.324931       | 8  |
| 19 | 2333.091384 | 1167.049330     | 2316.064835    | 1158.536055      | 2315.080819    | 1158.044047      | T    | 862.427825  | 431.717550      | 845.401276     | 423.204276       | 844.417260     | 422.712268       | 7  |
| 20 | 2430.144148 | 1215.575712     | 2413.117599    | 1207.062437      | 2412.133583    | 1206.570429      | P    | 761.380146  | 381.193711      | 744.353597     | 372.680436       | 743.369581     | 372.188428       | 6  |
| 21 | 2567.203060 | 1284.105168     | 2550.176511    | 1275.591893      | 2549.192495    | 1275.099885      | H    | 664.327382  | 332.667329      | 647.300833     | 324.154054       | 646.316817     | 323.662046       | 5  |
| 22 | 2668.250739 | 1334.629007     | 2651.224190    | 1326.115733      | 2650.240174    | 1325.623725      | T    | 527.268470  | 264.137873      | 510.241921     | 255.624598       | 509.257905     | 255.132590       | 4  |
| 23 | 2805.309651 | 1403.158463     | 2788.283102    | 1394.645189      | 2787.299086    | 1394.153181      | H    | 426.220791  | 213.614033      | 409.194242     | 205.100759       |                |                  | 3  |
| 24 | 2919.352578 | 1460.179927     | 2902.326029    | 1451.666652      | 2901.342013    | 1451.174644      | N    | 289.161879  | 145.084577      | 272.135330     | 136.571303       |                |                  | 2  |
| 25 |             |                 |                |                  |                |                  | R    | 175.118952  | 88.063114       | 158.092403     | 79.549839        |                |                  | 1  |

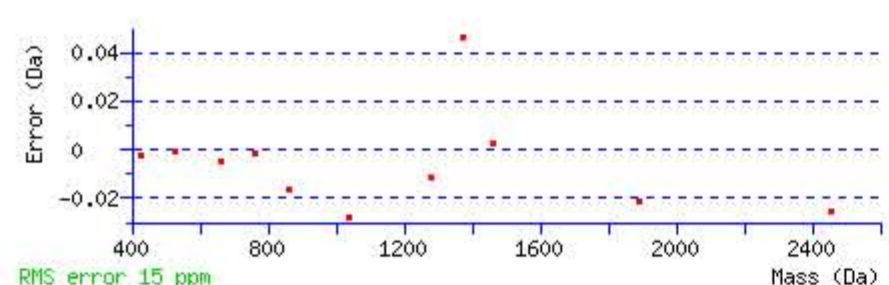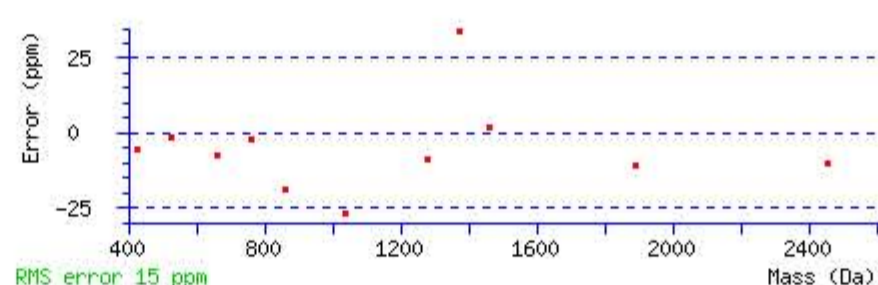

NCBI BLAST search of **GNVAVTVSGHTCQHWSAQTPHTHNR**  
 (Parameters: blastp, nr protein database, expect=20000, no filter, PAM30)  
 Other BLAST [web gateways](#)

## All matches to this query

| Score | Mr(calc):   | Delta     | Sequence                                  |
|-------|-------------|-----------|-------------------------------------------|
| 49.5  | 3092.457016 | -0.004246 | <a href="#">GNVAVTVSGHTCQHWSAQTPHTHNR</a> |
| 26.3  | 3092.457016 | -0.004246 | <a href="#">GNVAVTVSGHTCQHWSAQTPHTHNR</a> |

# MASCOT Search Results

## Peptide View

MS/MS Fragmentation of **VILGAHQEVNLEPHVQEIIEVSR**

Found in **PLMN\_HUMAN**, Plasminogen OS=Homo sapiens GN=PLG PE=1 SV=2

Match to Query 54796: 3117.662536 from(780.422910,4+) rtinseconds(2245) index(61967)

Title: Locus:1.1.1.1693.21 File:"2013-07-02 CLN FXIII 180 min 3rd FT.wiff"

Data file C:\Program Files (x86)\Matrix Science\Mascot Daemon\mgf9 FXIII 180 min 3rd\mascot\_daemon\_merge.mgf

Click mouse within plot area to zoom in by factor of two about that point

Or, Plot from  to  Da

Label all possible matches  Label matches used for scoring

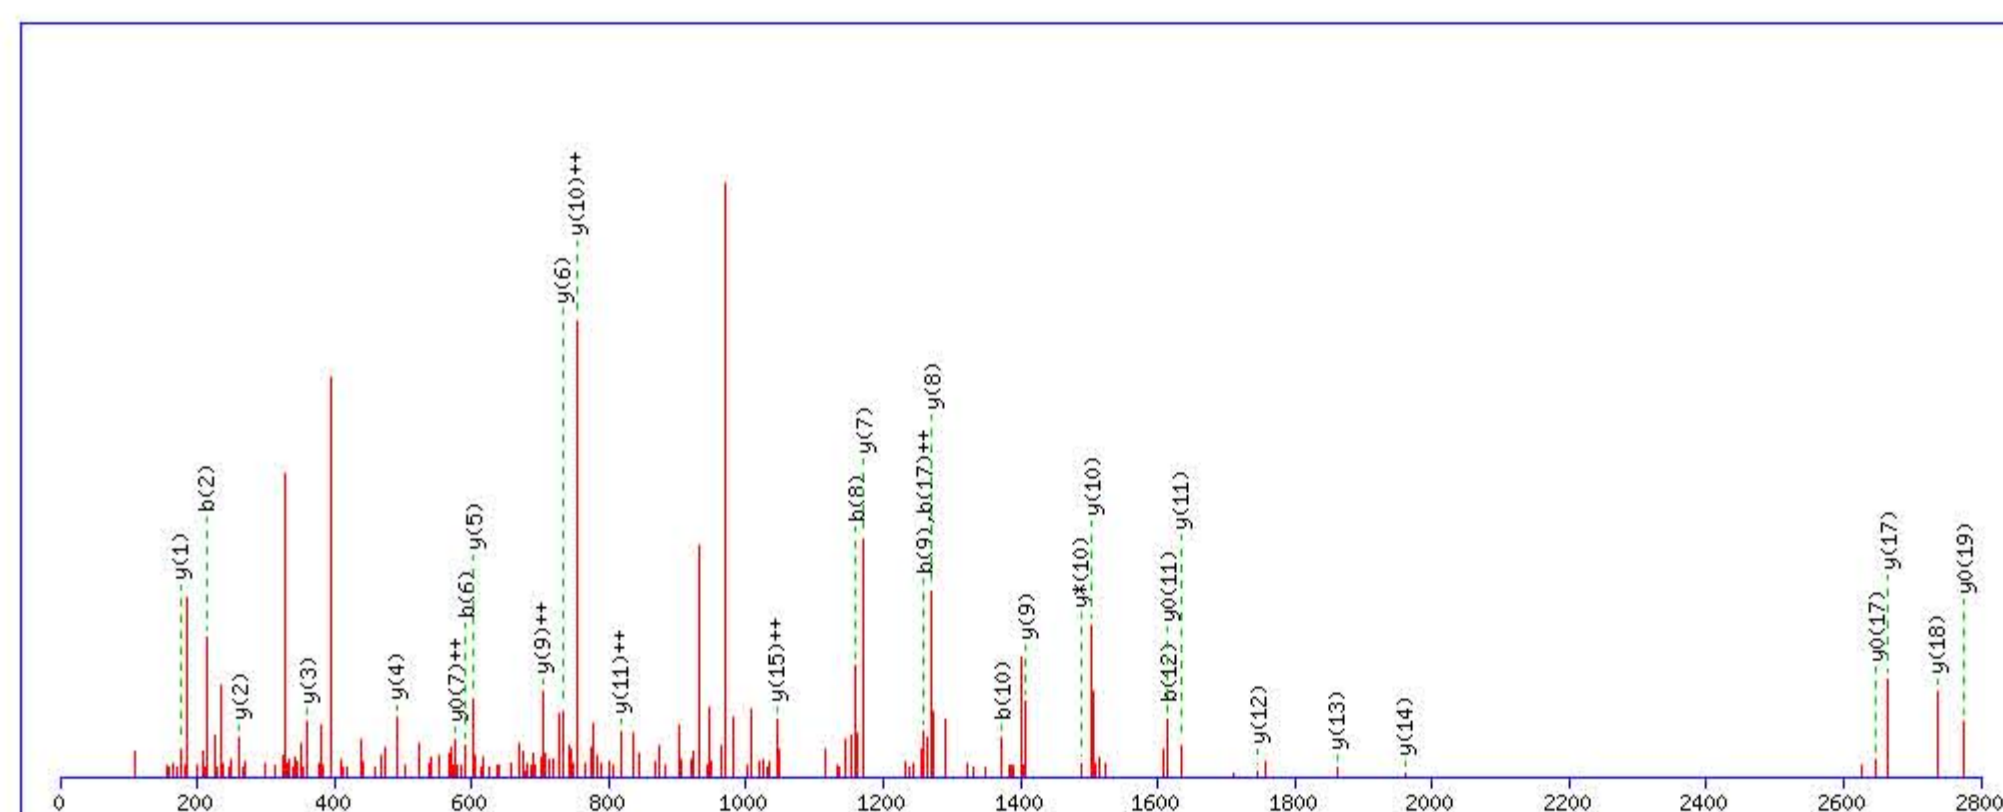

Monoisotopic mass of neutral peptide Mr(calc): 3117.646713

Fixed modifications: Carbamidomethyl (C) (apply to specified residues or termini only)

Variable modifications:

Q7 : Biotin:Thermo-21345 (Q)

Q16 : Biotin:Thermo-21345 (Q)

Ions Score: 73 Expect: 7.4e-007

Matches : 32/224 fragment ions using 72 most intense peaks [\(help\)](#)

| #  | b                  | b <sup>++</sup>    | b <sup>*</sup> | b <sup>*++</sup> | b <sup>0</sup> | b <sup>0++</sup> | Seq. | y                  | y <sup>++</sup>    | y <sup>*</sup>     | y <sup>*++</sup> | y <sup>0</sup>     | y <sup>0++</sup>  | #  |
|----|--------------------|--------------------|----------------|------------------|----------------|------------------|------|--------------------|--------------------|--------------------|------------------|--------------------|-------------------|----|
| 1  | 100.075690         | 50.541483          |                |                  |                |                  | V    |                    |                    |                    |                  |                    |                   | 22 |
| 2  | <b>213.159754</b>  | 107.083515         |                |                  |                |                  | I    | 3019.585595        | 1510.296435        | 3002.559046        | 1501.783161      | 3001.575030        | 1501.291153       | 21 |
| 3  | 326.243818         | 163.625547         |                |                  |                |                  | L    | 2906.501531        | 1453.754403        | 2889.474982        | 1445.241129      | 2888.490966        | 1444.749121       | 20 |
| 4  | 383.265282         | 192.136279         |                |                  |                |                  | G    | 2793.417467        | 1397.212371        | 2776.390918        | 1388.699097      | <b>2775.406902</b> | 1388.207089       | 19 |
| 5  | 454.302396         | 227.654836         |                |                  |                |                  | A    | <b>2736.396003</b> | 1368.701639        | 2719.369454        | 1360.188365      | 2718.385438        | 1359.696357       | 18 |
| 6  | <b>591.361308</b>  | 296.184292         |                |                  |                |                  | H    | <b>2665.358889</b> | 1333.183082        | 2648.332340        | 1324.669808      | <b>2647.348324</b> | 1324.177800       | 17 |
| 7  | 1030.586634        | 515.796955         | 1013.560085    | 507.283681       |                |                  | Q    | 2528.299977        | 1264.653627        | 2511.273428        | 1256.140352      | 2510.289412        | 1255.648344       | 16 |
| 8  | <b>1159.629227</b> | 580.318252         | 1142.602678    | 571.804977       | 1141.618662    | 571.312969       | E    | 2089.074651        | <b>1045.040963</b> | 2072.048102        | 1036.527689      | 2071.064086        | 1036.035681       | 15 |
| 9  | <b>1258.697641</b> | 629.852459         | 1241.671092    | 621.339184       | 1240.687076    | 620.847176       | V    | <b>1960.032058</b> | 980.519667         | 1943.005509        | 972.006393       | 1942.021493        | 971.514385        | 14 |
| 10 | <b>1372.740568</b> | 686.873922         | 1355.714019    | 678.360648       | 1354.730003    | 677.868640       | N    | <b>1860.963644</b> | 930.985460         | 1843.937095        | 922.472186       | 1842.953079        | 921.980178        | 13 |
| 11 | 1485.824632        | 743.415954         | 1468.798083    | 734.902680       | 1467.814067    | 734.410672       | L    | <b>1746.920717</b> | 873.963997         | 1729.894168        | 865.450722       | 1728.910152        | 864.958714        | 12 |
| 12 | <b>1614.867225</b> | 807.937251         | 1597.840676    | 799.423976       | 1596.856660    | 798.931968       | E    | <b>1633.836653</b> | <b>817.421965</b>  | 1616.810104        | 808.908690       | <b>1615.826088</b> | 808.416682        | 11 |
| 13 | 1711.919989        | 856.463633         | 1694.893440    | 847.950358       | 1693.909424    | 847.458350       | P    | <b>1504.794060</b> | <b>752.900668</b>  | <b>1487.767511</b> | 744.387394       | 1486.783495        | 743.895386        | 10 |
| 14 | 1848.978901        | 924.993089         | 1831.952352    | 916.479814       | 1830.968336    | 915.987806       | H    | <b>1407.741296</b> | <b>704.374286</b>  | 1390.714747        | 695.861012       | 1389.730731        | 695.369004        | 9  |
| 15 | 1948.047315        | 974.527296         | 1931.020766    | 966.014021       | 1930.036750    | 965.522013       | V    | <b>1270.682384</b> | 635.844830         | 1253.655835        | 627.331556       | 1252.671819        | 626.839548        | 8  |
| 16 | 2387.272641        | 1194.139958        | 2370.246092    | 1185.626684      | 2369.262076    | 1185.134676      | Q    | <b>1171.613970</b> | 586.310623         | 1154.587421        | 577.797349       | 1153.603405        | <b>577.305341</b> | 7  |
| 17 | 2516.315234        | <b>1258.661255</b> | 2499.288685    | 1250.147980      | 2498.304669    | 1249.655973      | E    | <b>732.388644</b>  | 366.697960         | 715.362095         | 358.184686       | 714.378079         | 357.692678        | 6  |
| 18 | 2629.399298        | 1315.203287        | 2612.372749    | 1306.690013      | 2611.388733    | 1306.198005      | I    | <b>603.346051</b>  | 302.176664         | 586.319502         | 293.663389       | 585.335486         | 293.171381        | 5  |
| 19 | 2758.441891        | 1379.724584        | 2741.415342    | 1371.211309      | 2740.431326    | 1370.719301      | E    | <b>490.261987</b>  | 245.634631         | 473.235438         | 237.121357       | 472.251422         | 236.629349        | 4  |
| 20 | 2857.510305        | 1429.258791        | 2840.483756    | 1420.745516      | 2839.499740    | 1420.253508      | V    | <b>361.219394</b>  | 181.113335         | 344.192845         | 172.600060       | 343.208829         | 172.108052        | 3  |
| 21 | 2944.542333        | 1472.774805        | 2927.515784    | 1464.261530      | 2926.531768    | 1463.769522      | S    | <b>262.150980</b>  | 131.579128         | 245.124431         | 123.065854       | 244.140415         | 122.573846        | 2  |
| 22 |                    |                    |                |                  |                |                  | R    | <b>175.118952</b>  | 88.063114          | 158.092403         | 79.549839        |                    |                   | 1  |

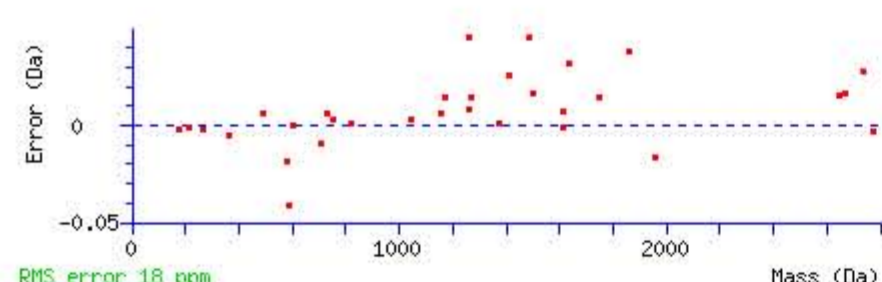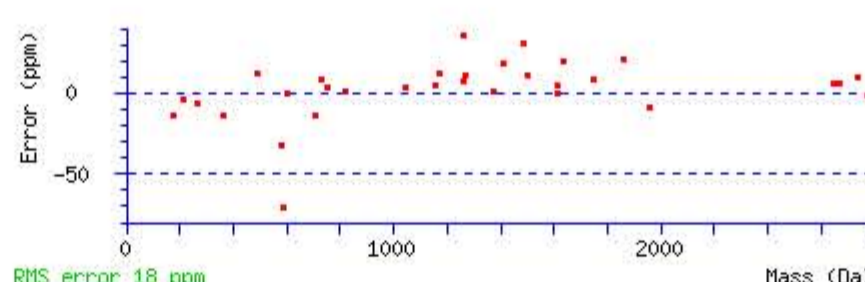

NCBI BLAST search of **VILGAHQEVNLEPHVQEIIEVSR**

(Parameters: blastp, nr protein database, expect=20000, no filter, PAM30)

Other BLAST [web gateways](#)

All matches to this query

| Score | Mr(calc):   | Delta    | Sequence                                |
|-------|-------------|----------|-----------------------------------------|
| 73.4  | 3117.646713 | 0.015823 | <a href="#">VILGAHQEVNLEPHVQEIIEVSR</a> |

Mascot: <http://www.matrixscience.com/>

# Mascot Search Results

## Peptide View

MS/MS Fragmentation of **KLYDYCDVPQCAAPSFDCGKQPVEPK**  
 Found in **PLMN\_HUMAN**, Plasminogen OS=Homo sapiens GN=PLG PE=1 SV=2

Match to Query 58613: 3382.563456 from(846.648140,4+) rtinseconds(1944) index(60206)  
 Title: Locus:1.1.1.1588.26 File:"2013-07-02 CLN FXIII 180 min 3rd FT.wiff"  
 Data file C:\Program Files (x86)\Matrix Science\Mascot Daemon\mgf9 FXIII 180 min 3rd\mascot\_daemon\_merge.mgf

Click mouse within plot area to zoom in by factor of two about that point

Or, Plot from  to  Da

Label all possible matches  Label matches used for scoring

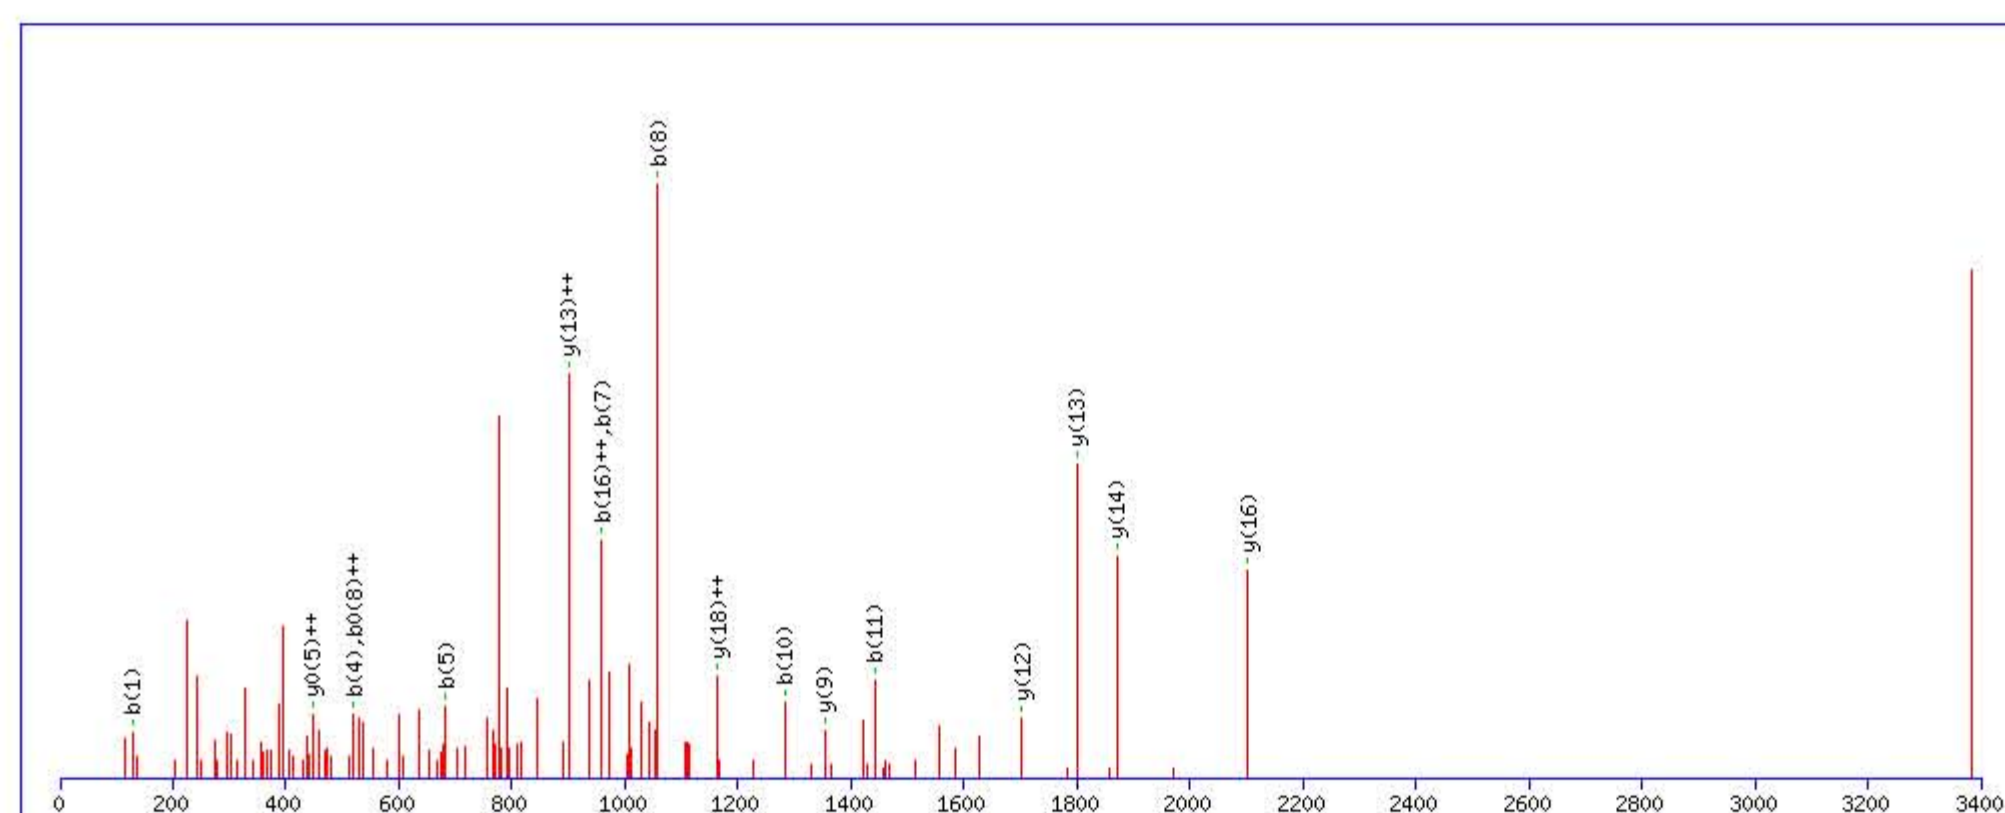

Monoisotopic mass of neutral peptide Mr(calc): 3382.549469  
 Fixed modifications: Carbamidomethyl (C) (apply to specified residues or termini only)  
 Variable modifications:  
 Q22 : Biotin:Thermo-21345 (Q)  
 Ions Score: 47 Expect: 0.00028  
 Matches : 17/290 fragment ions using 21 most intense peaks ([help](#))

| #  | b                  | b <sup>++</sup>   | b <sup>*</sup> | b <sup>+++</sup> | b <sup>0</sup> | b <sup>0++</sup>  | Seq.     | y                  | y <sup>++</sup>    | y <sup>*</sup> | y <sup>+++</sup> | y <sup>0</sup> | y <sup>0++</sup>  | #         |
|----|--------------------|-------------------|----------------|------------------|----------------|-------------------|----------|--------------------|--------------------|----------------|------------------|----------------|-------------------|-----------|
| 1  | <b>129.102239</b>  | 65.054757         | 112.075690     | 56.541483        |                |                   | <b>K</b> |                    |                    |                |                  |                |                   | <b>26</b> |
| 2  | 242.186303         | 121.596790        | 225.159754     | 113.083515       |                |                   | <b>L</b> | 3255.461780        | 1628.234528        | 3238.435231    | 1619.721253      | 3237.451215    | 1619.229245       | <b>25</b> |
| 3  | 405.249632         | 203.128454        | 388.223083     | 194.615180       |                |                   | <b>Y</b> | 3142.377716        | 1571.692496        | 3125.351167    | 1563.179221      | 3124.367151    | 1562.687213       | <b>24</b> |
| 4  | <b>520.276575</b>  | 260.641926        | 503.250026     | 252.128651       | 502.266010     | 251.636643        | <b>D</b> | 2979.314387        | 1490.160831        | 2962.287838    | 1481.647557      | 2961.303822    | 1481.155549       | <b>23</b> |
| 5  | <b>683.339904</b>  | 342.173590        | 666.313355     | 333.660316       | 665.329339     | 333.168308        | <b>Y</b> | 2864.287444        | 1432.647360        | 2847.260895    | 1424.134085      | 2846.276879    | 1423.642077       | <b>22</b> |
| 6  | 843.370553         | 422.188915        | 826.344004     | 413.675640       | 825.359988     | 413.183632        | <b>C</b> | 2701.224115        | 1351.115695        | 2684.197566    | 1342.602421      | 2683.213550    | 1342.110413       | <b>21</b> |
| 7  | <b>958.397496</b>  | 479.702386        | 941.370947     | 471.189112       | 940.386931     | 470.697104        | <b>D</b> | 2541.193466        | 1271.100371        | 2524.166917    | 1262.587096      | 2523.182901    | 1262.095089       | <b>20</b> |
| 8  | <b>1057.465910</b> | 529.236593        | 1040.439361    | 520.723319       | 1039.455345    | <b>520.231311</b> | <b>V</b> | 2426.166523        | 1213.586899        | 2409.139974    | 1205.073625      | 2408.155958    | 1204.581617       | <b>19</b> |
| 9  | 1154.518674        | 577.762975        | 1137.492125    | 569.249701       | 1136.508109    | 568.757693        | <b>P</b> | 2327.098109        | <b>1164.052692</b> | 2310.071560    | 1155.539418      | 2309.087544    | 1155.047410       | <b>18</b> |
| 10 | <b>1282.577252</b> | 641.792264        | 1265.550703    | 633.278990       | 1264.566687    | 632.786982        | <b>Q</b> | 2230.045345        | 1115.526310        | 2213.018796    | 1107.013036      | 2212.034780    | 1106.521028       | <b>17</b> |
| 11 | <b>1442.607901</b> | 721.807589        | 1425.581352    | 713.294314       | 1424.597336    | 712.802306        | <b>C</b> | <b>2101.986767</b> | 1051.497021        | 2084.960218    | 1042.983747      | 2083.976202    | 1042.491739       | <b>16</b> |
| 12 | 1513.645015        | 757.326146        | 1496.618466    | 748.812871       | 1495.634450    | 748.320863        | <b>A</b> | 1941.956118        | 971.481697         | 1924.929569    | 962.968423       | 1923.945553    | 962.476415        | <b>15</b> |
| 13 | 1584.682129        | 792.844703        | 1567.655580    | 784.331428       | 1566.671564    | 783.839420        | <b>A</b> | <b>1870.919004</b> | 935.963140         | 1853.892455    | 927.449866       | 1852.908439    | 926.957858        | <b>14</b> |
| 14 | 1681.734893        | 841.371085        | 1664.708344    | 832.857810       | 1663.724328    | 832.365802        | <b>P</b> | <b>1799.881890</b> | <b>900.444583</b>  | 1782.855341    | 891.931309       | 1781.871325    | 891.439301        | <b>13</b> |
| 15 | 1768.766921        | 884.887099        | 1751.740372    | 876.373824       | 1750.756356    | 875.881816        | <b>S</b> | <b>1702.829126</b> | 851.918201         | 1685.802577    | 843.404927       | 1684.818561    | 842.912919        | <b>12</b> |
| 16 | 1915.835335        | <b>958.421306</b> | 1898.808786    | 949.908031       | 1897.824770    | 949.416023        | <b>F</b> | 1615.797098        | 808.402187         | 1598.770549    | 799.888913       | 1597.786533    | 799.396905        | <b>11</b> |
| 17 | 2030.862278        | 1015.934777       | 2013.835729    | 1007.421503      | 2012.851713    | 1006.929495       | <b>D</b> | 1468.728684        | 734.867980         | 1451.702135    | 726.354706       | 1450.718119    | 725.862698        | <b>10</b> |
| 18 | 2190.892927        | 1095.950102       | 2173.866378    | 1087.436827      | 2172.882362    | 1086.944819       | <b>C</b> | <b>1353.701741</b> | 677.354509         | 1336.675192    | 668.841234       | 1335.691176    | 668.349226        | <b>9</b>  |
| 19 | 2247.914391        | 1124.460834       | 2230.887842    | 1115.947559      | 2229.903826    | 1115.455551       | <b>G</b> | 1193.671092        | 597.339184         | 1176.644543    | 588.825910       | 1175.660527    | 588.333902        | <b>8</b>  |
| 20 | 2376.009354        | 1188.508315       | 2358.982805    | 1179.995041      | 2357.998789    | 1179.503033       | <b>K</b> | 1136.649628        | 568.828452         | 1119.623079    | 560.315178       | 1118.639063    | 559.823170        | <b>7</b>  |
| 21 | 2473.062118        | 1237.034697       | 2456.035569    | 1228.521423      | 2455.051553    | 1228.029415       | <b>P</b> | 1008.554665        | 504.780971         | 991.528116     | 496.267696       | 990.544100     | 495.775688        | <b>6</b>  |
| 22 | 2912.287444        | 1456.647360       | 2895.260895    | 1448.134086      | 2894.276879    | 1447.642078       | <b>Q</b> | 911.501901         | 456.254589         | 894.475352     | 447.741314       | 893.491336     | <b>447.249306</b> | <b>5</b>  |
| 23 | 3011.355858        | 1506.181567       | 2994.329309    | 1497.668293      | 2993.345293    | 1497.176285       | <b>V</b> | 472.276575         | 236.641925         | 455.250026     | 228.128651       | 454.266010     | 227.636643        | <b>4</b>  |
| 24 | 3140.398451        | 1570.702864       | 3123.371902    | 1562.189589      | 3122.387886    | 1561.697581       | <b>E</b> | 373.208161         | 187.107719         | 356.181612     | 178.594444       | 355.197596     | 178.102436        | <b>3</b>  |
| 25 | 3237.451215        | 1619.229246       | 3220.424666    | 1610.715971      | 3219.440650    | 1610.223963       | <b>P</b> | 244.165568         | 122.586422         | 227.139019     | 114.073148       |                |                   | <b>2</b>  |
| 26 |                    |                   |                |                  |                |                   | <b>K</b> | 147.112804         | 74.060040          | 130.086255     | 65.546765        |                |                   | <b>1</b>  |

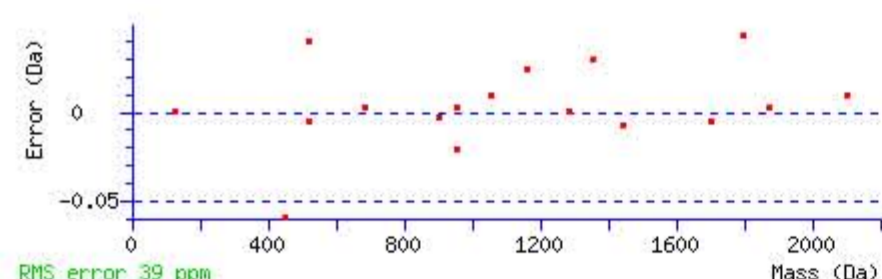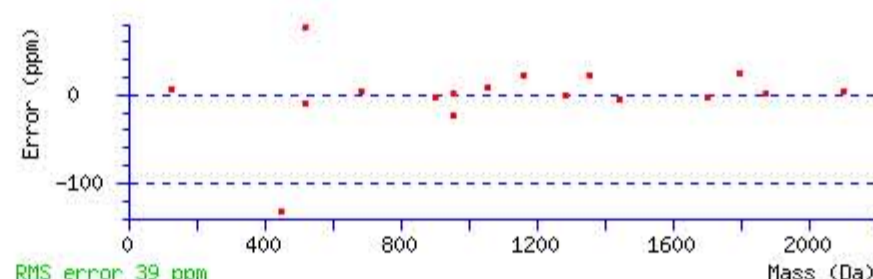

NCBI BLAST search of **KLYDYCDVPQCAAPSFDCGKQPVEPK**  
 (Parameters: blastp, nr protein database, expect=20000, no filter, PAM30)  
 Other BLAST [web gateways](#)

## All matches to this query

| Score | Mr(calc):   | Delta    | Sequence                                   |
|-------|-------------|----------|--------------------------------------------|
| 46.5  | 3382.549469 | 0.013987 | <a href="#">KLYDYCDVPQCAAPSFDCGKQPVEPK</a> |
| 4.4   | 3382.549469 | 0.013987 | <a href="#">KLYDYCDVPQCAAPSFDCGKQPVEPK</a> |

**MASCOT** Mascot Search Results

**Peptide View**

MS/MS Fragmentation of **KLYDYCDVPQCAAPSFDCGKQPVEPK**  
 Found in **PLMN\_HUMAN**, Plasminogen OS=Homo sapiens GN=PLG PE=1 SV=2

Match to Query 58614: 3382.568056 from(846.649290,4+) rtinseconds(1996) index(60612)  
 Title: Locus:1.1.1.1606.25 File:"2013-07-02 CLN FXIII 180 min 3rd FT.wiff"  
 Data file C:\Program Files (x86)\Matrix Science\Mascot Daemon\mgf9 FXIII 180 min 3rd\mascot\_daemon\_merge.mgf

Click mouse within plot area to zoom in by factor of two about that point  
 Or, Plot from  to  Da   
 Label all possible matches  Label matches used for scoring

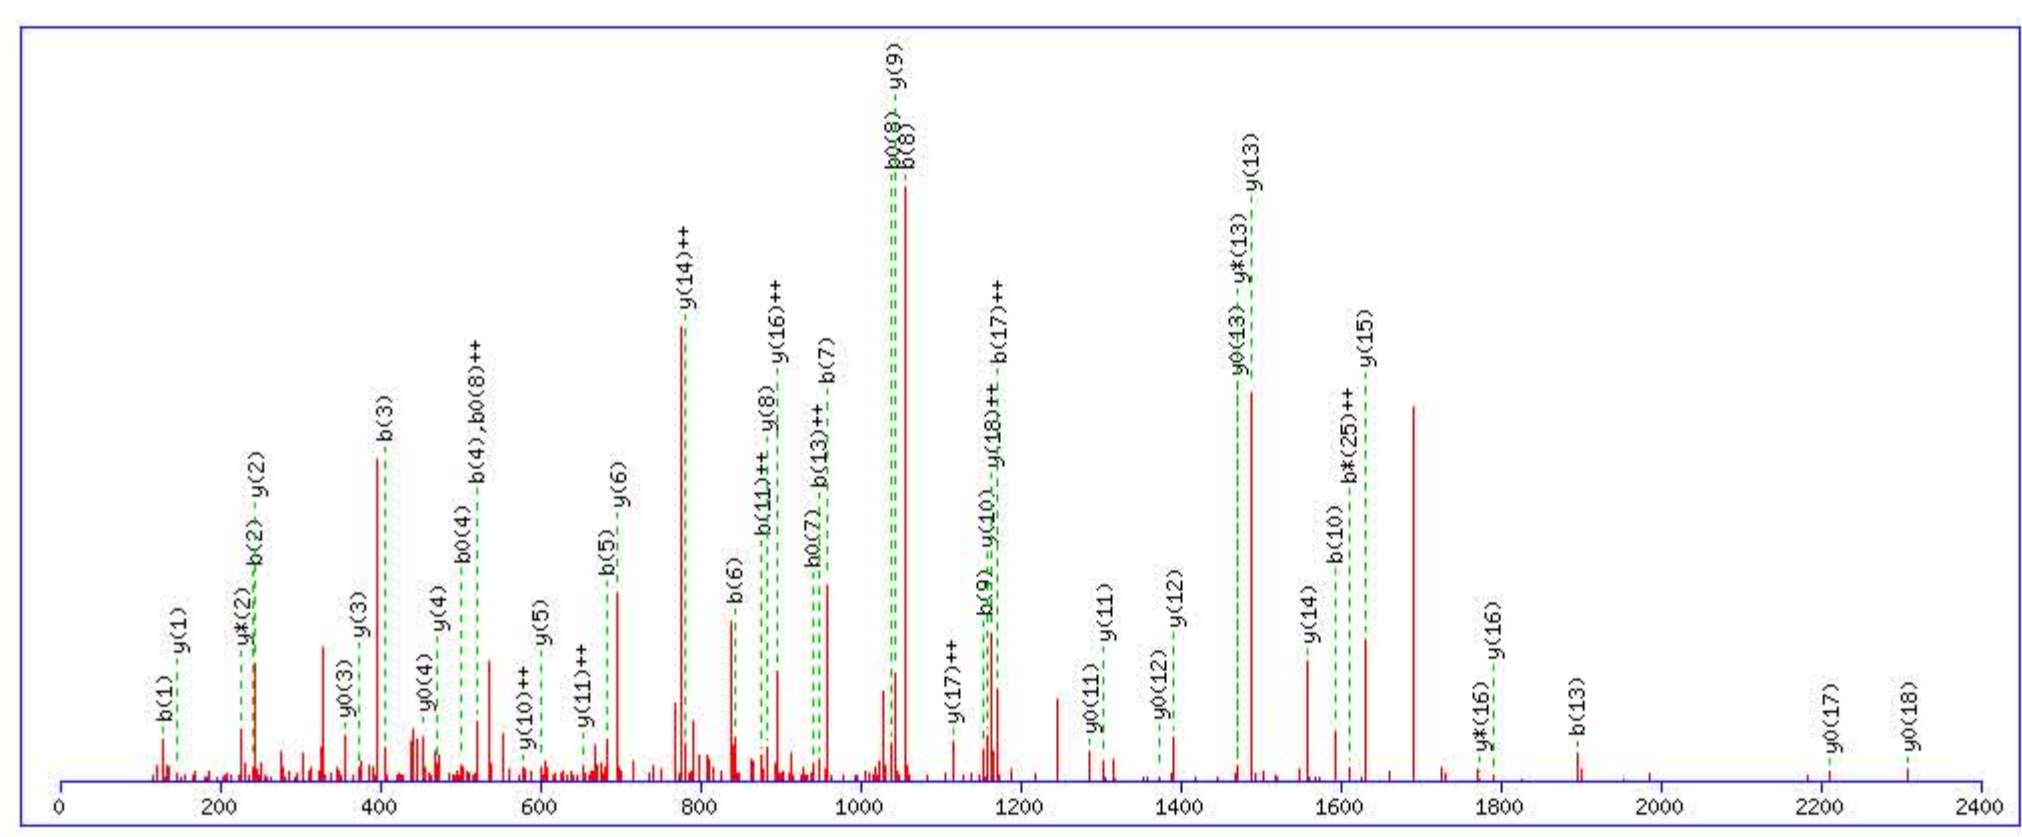

Monoisotopic mass of neutral peptide Mr(calc): 3382.549469  
 Fixed modifications: Carbamidomethyl (C) (apply to specified residues or termini only)  
 Variable modifications:  
 Q10 : Biotin:Thermo-21345 (Q)  
 Ions Score: 60 Expect: 1.3e-005  
 Matches : 50/290 fragment ions using 151 most intense peaks ([help](#))

| #  | b           | b <sup>++</sup> | b <sup>*</sup> | b <sup>+++</sup> | b <sup>0</sup> | b <sup>0++</sup> | Seq. | y           | y <sup>++</sup> | y <sup>*</sup> | y <sup>+++</sup> | y <sup>0</sup> | y <sup>0++</sup> | #  |
|----|-------------|-----------------|----------------|------------------|----------------|------------------|------|-------------|-----------------|----------------|------------------|----------------|------------------|----|
| 1  | 129.102239  | 65.054757       | 112.075690     | 56.541483        |                |                  | K    |             |                 |                |                  |                |                  | 26 |
| 2  | 242.186303  | 121.596790      | 225.159754     | 113.083515       |                |                  | L    | 3255.461780 | 1628.234528     | 3238.435231    | 1619.721253      | 3237.451215    | 1619.229245      | 25 |
| 3  | 405.249632  | 203.128454      | 388.223083     | 194.615180       |                |                  | Y    | 3142.377716 | 1571.692496     | 3125.351167    | 1563.179221      | 3124.367151    | 1562.687213      | 24 |
| 4  | 520.276575  | 260.641926      | 503.250026     | 252.128651       | 502.266010     | 251.636643       | D    | 2979.314387 | 1490.160831     | 2962.287838    | 1481.647557      | 2961.303822    | 1481.155549      | 23 |
| 5  | 683.339904  | 342.173590      | 666.313355     | 333.660316       | 665.329339     | 333.168308       | Y    | 2864.287444 | 1432.647360     | 2847.260895    | 1424.134085      | 2846.276879    | 1423.642077      | 22 |
| 6  | 843.370553  | 422.188915      | 826.344004     | 413.675640       | 825.359988     | 413.183632       | C    | 2701.224115 | 1351.115695     | 2684.197566    | 1342.602421      | 2683.213550    | 1342.110413      | 21 |
| 7  | 958.397496  | 479.702386      | 941.370947     | 471.189112       | 940.386931     | 470.697104       | D    | 2541.193466 | 1271.100371     | 2524.166917    | 1262.587096      | 2523.182901    | 1262.095088      | 20 |
| 8  | 1057.465910 | 529.236593      | 1040.439361    | 520.723319       | 1039.455345    | 520.231311       | V    | 2426.166523 | 1213.586899     | 2409.139974    | 1205.073625      | 2408.155958    | 1204.581617      | 19 |
| 9  | 1154.518674 | 577.762975      | 1137.492125    | 569.249701       | 1136.508109    | 568.757693       | P    | 2327.098109 | 1164.052692     | 2310.071560    | 1155.539418      | 2309.087544    | 1155.047410      | 18 |
| 10 | 1593.744000 | 797.375638      | 1576.717451    | 788.862364       | 1575.733435    | 788.370356       | Q    | 2230.045345 | 1115.526310     | 2213.018796    | 1107.013036      | 2212.034780    | 1106.521028      | 17 |
| 11 | 1753.774649 | 877.390963      | 1736.748100    | 868.877688       | 1735.764084    | 868.385680       | C    | 1790.820019 | 895.913647      | 1773.793470    | 887.400373       | 1772.809454    | 886.908365       | 16 |
| 12 | 1824.811763 | 912.909520      | 1807.785214    | 904.396245       | 1806.801198    | 903.904237       | A    | 1630.789370 | 815.898323      | 1613.762821    | 807.385048       | 1612.778805    | 806.893040       | 15 |
| 13 | 1895.848877 | 948.428077      | 1878.822328    | 939.914802       | 1877.838312    | 939.422794       | A    | 1559.752256 | 780.379766      | 1542.725707    | 771.866491       | 1541.741691    | 771.374483       | 14 |
| 14 | 1992.901641 | 996.954459      | 1975.875092    | 988.441184       | 1974.891076    | 987.949176       | P    | 1488.715142 | 744.861209      | 1471.688593    | 736.347934       | 1470.704577    | 735.855926       | 13 |
| 15 | 2079.933669 | 1040.470472     | 2062.907120    | 1031.957198      | 2061.923104    | 1031.465190      | S    | 1391.662378 | 696.334827      | 1374.635829    | 687.821552       | 1373.651813    | 687.329544       | 12 |
| 16 | 2227.002083 | 1114.004679     | 2209.975534    | 1105.491405      | 2208.991518    | 1104.999397      | F    | 1304.630350 | 652.818813      | 1287.603801    | 644.305538       | 1286.619785    | 643.813530       | 11 |
| 17 | 2342.029026 | 1171.518151     | 2325.002477    | 1163.004876      | 2324.018461    | 1162.512868      | D    | 1157.561936 | 579.284606      | 1140.535387    | 570.771331       | 1139.551371    | 570.279323       | 10 |
| 18 | 2502.059675 | 1251.533475     | 2485.033126    | 1243.020201      | 2484.049110    | 1242.528193      | C    | 1042.534993 | 521.771135      | 1025.508444    | 513.257860       | 1024.524428    | 512.765852       | 9  |
| 19 | 2559.081139 | 1280.044207     | 2542.054590    | 1271.530933      | 2541.070574    | 1271.038925      | G    | 882.504344  | 441.755810      | 865.477795     | 433.242536       | 864.493779     | 432.750528       | 8  |
| 20 | 2687.176102 | 1344.091689     | 2670.149553    | 1335.578414      | 2669.165537    | 1335.086406      | K    | 825.482880  | 413.245078      | 808.456331     | 404.731804       | 807.472315     | 404.239796       | 7  |
| 21 | 2784.228866 | 1392.618071     | 2767.202317    | 1384.104796      | 2766.218301    | 1383.612788      | P    | 697.387917  | 349.197597      | 680.361368     | 340.684322       | 679.377352     | 340.192314       | 6  |
| 22 | 2912.287444 | 1456.647360     | 2895.260895    | 1448.134085      | 2894.276879    | 1447.642077      | Q    | 600.335153  | 300.671215      | 583.308604     | 292.157940       | 582.324588     | 291.665932       | 5  |
| 23 | 3011.355858 | 1506.181567     | 2994.329309    | 1497.668292      | 2993.345293    | 1497.176284      | V    | 472.276575  | 236.641925      | 455.250026     | 228.128651       | 454.266010     | 227.636643       | 4  |
| 24 | 3140.398451 | 1570.702863     | 3123.371902    | 1562.189589      | 3122.387886    | 1561.697581      | E    | 373.208161  | 187.107719      | 356.181612     | 178.594444       | 355.197596     | 178.102436       | 3  |
| 25 | 3237.451215 | 1619.229245     | 3220.424666    | 1610.715971      | 3219.440650    | 1610.223963      | P    | 244.165568  | 122.586422      | 227.139019     | 114.073148       |                |                  | 2  |
| 26 |             |                 |                |                  |                |                  | K    | 147.112804  | 74.060040       | 130.086255     | 65.546765        |                |                  | 1  |

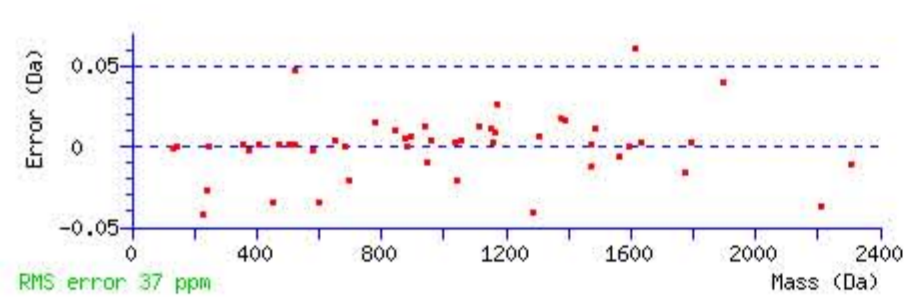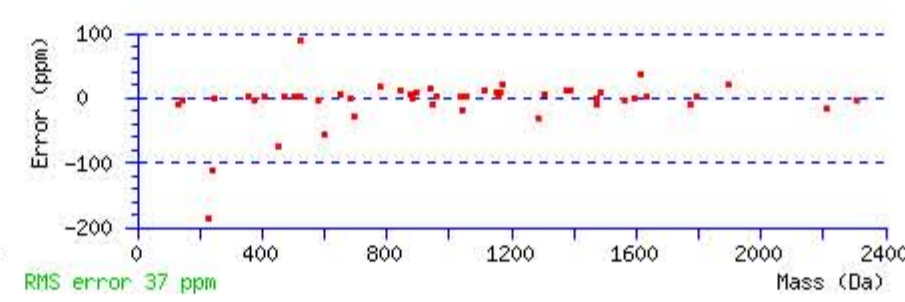

NCBI BLAST search of **KLYDYCDVPQCAAPSFDCGKQPVEPK**  
 (Parameters: blastp, nr protein database, expect=20000, no filter, PAM30)  
 Other BLAST [web gateways](#)

**All matches to this query**

| Score | Mr(calc):   | Delta    | Sequence                                   |
|-------|-------------|----------|--------------------------------------------|
| 60.0  | 3382.549469 | 0.018587 | <a href="#">KLYDYCDVPQCAAPSFDCGKQPVEPK</a> |
| 6.2   | 3382.549469 | 0.018587 | <a href="#">KLYDYCDVPQCAAPSFDCGKQPVEPK</a> |

# Mascot Search Results

## Peptide View

MS/MS Fragmentation of **GNVAVTVSGHTCQHWSAQTPHTHNR**

Found in **PLMN\_HUMAN**, Plasminogen OS=Homo sapiens GN=PLG PE=1 SV=2

Match to Query 58836: 3403.620444 from(568.277350,6+) rtinseconds(1678) index(58845)

Title: Locus:1.1.1.1496.5 File:"2013-07-02 CLN FXIII 180 min 3rd FT.wiff"

Data file C:\Program Files (x86)\Matrix Science\Mascot Daemon\mgf\9 FXIII 180 min 3rd\mascot\_daemon\_merge.mgf

Click mouse within plot area to zoom in by factor of two about that point

Or, Plot from  to  Da

Label all possible matches  Label matches used for scoring

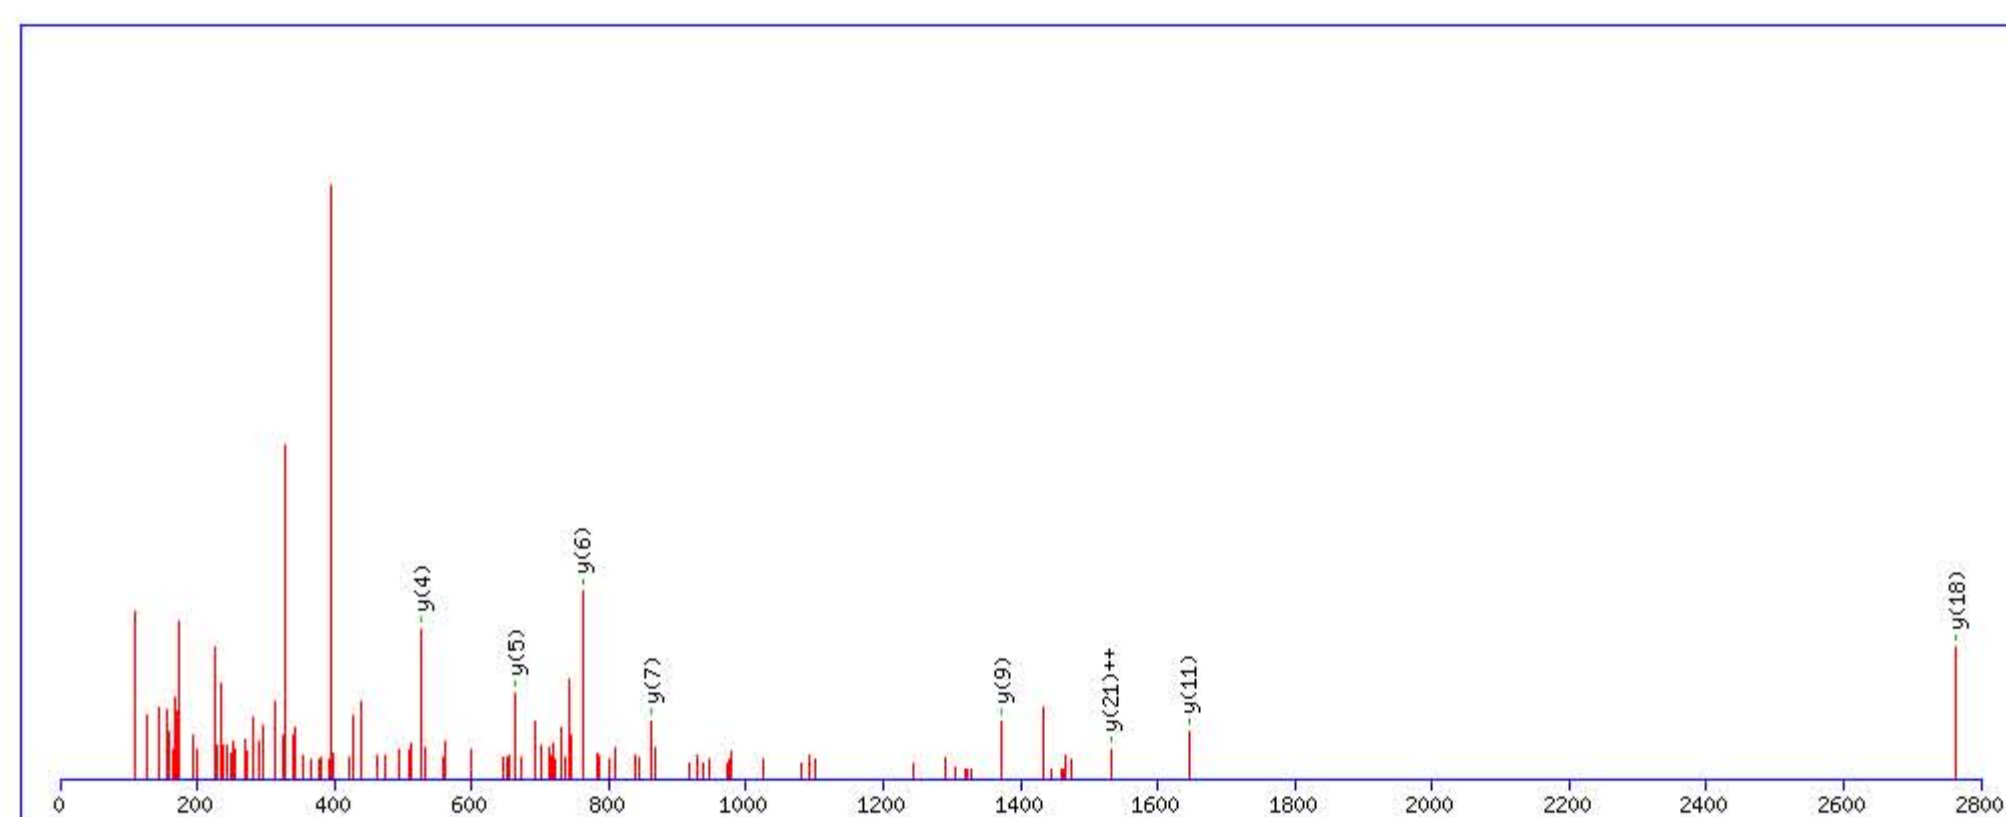

Monoisotopic mass of neutral peptide Mr(calc): 3403.623764

Fixed modifications: Carbamidomethyl (C) (apply to specified residues or termini only)

Variable modifications:

Q13 : Biotin:Thermo-21345 (Q)

Q18 : Biotin:Thermo-21345 (Q)

Ions Score: 25 Expect: 0.073

Matches : 8/270 fragment ions using 16 most intense peaks [\(help\)](#)

| #  | b           | b <sup>++</sup> | b <sup>+</sup> | b <sup>+++</sup> | b <sup>0</sup> | b <sup>0++</sup> | Seq. | y           | y <sup>++</sup> | y <sup>+</sup> | y <sup>+++</sup> | y <sup>0</sup> | y <sup>0++</sup> | #  |
|----|-------------|-----------------|----------------|------------------|----------------|------------------|------|-------------|-----------------|----------------|------------------|----------------|------------------|----|
| 1  | 58.028740   | 29.518008       |                |                  |                |                  | G    |             |                 |                |                  |                |                  | 25 |
| 2  | 172.071667  | 86.539471       | 155.045118     | 78.026197        |                |                  | N    | 3347.609538 | 1674.308407     | 3330.582989    | 1665.795132      | 3329.598973    | 1665.303124      | 24 |
| 3  | 271.140081  | 136.073679      | 254.113532     | 127.560404       |                |                  | V    | 3233.566611 | 1617.286943     | 3216.540062    | 1608.773669      | 3215.556046    | 1608.281661      | 23 |
| 4  | 342.177195  | 171.592236      | 325.150646     | 163.078961       |                |                  | A    | 3134.498197 | 1567.752736     | 3117.471648    | 1559.239462      | 3116.487632    | 1558.747454      | 22 |
| 5  | 441.245609  | 221.126443      | 424.219060     | 212.613168       |                |                  | V    | 3063.461083 | 1532.234179     | 3046.434534    | 1523.720905      | 3045.450518    | 1523.228897      | 21 |
| 6  | 542.293288  | 271.650282      | 525.266739     | 263.137008       | 524.282723     | 262.645000       | T    | 2964.392669 | 1482.699972     | 2947.366120    | 1474.186698      | 2946.382104    | 1473.694690      | 20 |
| 7  | 641.361702  | 321.184489      | 624.335153     | 312.671215       | 623.351137     | 312.179207       | V    | 2863.344990 | 1432.176133     | 2846.318441    | 1423.662858      | 2845.334425    | 1423.170850      | 19 |
| 8  | 728.393730  | 364.700503      | 711.367181     | 356.187229       | 710.383165     | 355.695221       | S    | 2764.276576 | 1382.641926     | 2747.250027    | 1374.128651      | 2746.266011    | 1373.636643      | 18 |
| 9  | 785.415194  | 393.211235      | 768.388645     | 384.697961       | 767.404629     | 384.205953       | G    | 2677.244548 | 1339.125912     | 2660.217999    | 1330.612637      | 2659.233983    | 1330.120629      | 17 |
| 10 | 922.474106  | 461.740691      | 905.447557     | 453.227417       | 904.463541     | 452.735409       | H    | 2620.223084 | 1310.615180     | 2603.196535    | 1302.101905      | 2602.212519    | 1301.609897      | 16 |
| 11 | 1023.521785 | 512.264530      | 1006.495236    | 503.751256       | 1005.511220    | 503.259248       | T    | 2483.164172 | 1242.085724     | 2466.137623    | 1233.572449      | 2465.153607    | 1233.080441      | 15 |
| 12 | 1183.552434 | 592.279855      | 1166.525885    | 583.766581       | 1165.541869    | 583.274572       | C    | 2382.116493 | 1191.561884     | 2365.089944    | 1183.048610      | 2364.105928    | 1182.556602      | 14 |
| 13 | 1622.777760 | 811.892518      | 1605.751211    | 803.379244       | 1604.767195    | 802.887236       | Q    | 2222.085844 | 1111.546560     | 2205.059295    | 1103.033285      | 2204.075279    | 1102.541277      | 13 |
| 14 | 1759.836672 | 880.421974      | 1742.810123    | 871.908700       | 1741.826107    | 871.416692       | H    | 1782.860518 | 891.933897      | 1765.833969    | 883.420622       | 1764.849953    | 882.928614       | 12 |
| 15 | 1945.915985 | 973.461631      | 1928.889436    | 964.948356       | 1927.905420    | 964.456348       | W    | 1645.801606 | 823.404441      | 1628.775057    | 814.891166       | 1627.791041    | 814.399158       | 11 |
| 16 | 2032.948013 | 1016.977645     | 2015.921464    | 1008.464370      | 2014.937448    | 1007.972362      | S    | 1459.722293 | 730.364784      | 1442.695744    | 721.851510       | 1441.711728    | 721.359502       | 10 |
| 17 | 2103.985127 | 1052.496201     | 2086.958578    | 1043.982927      | 2085.974562    | 1043.490919      | A    | 1372.690265 | 686.848770      | 1355.663716    | 678.335496       | 1354.679700    | 677.843488       | 9  |
| 18 | 2543.210453 | 1272.108865     | 2526.183904    | 1263.595590      | 2525.199888    | 1263.103582      | Q    | 1301.653151 | 651.330213      | 1284.626602    | 642.816939       | 1283.642586    | 642.324931       | 8  |
| 19 | 2644.258132 | 1322.632704     | 2627.231583    | 1314.119429      | 2626.247567    | 1313.627421      | T    | 862.427825  | 431.717550      | 845.401276     | 423.204276       | 844.417260     | 422.712268       | 7  |
| 20 | 2741.310896 | 1371.159086     | 2724.284347    | 1362.645811      | 2723.300331    | 1362.153803      | P    | 761.380146  | 381.193711      | 744.353597     | 372.680436       | 743.369581     | 372.188428       | 6  |
| 21 | 2878.369808 | 1439.688542     | 2861.343259    | 1431.175267      | 2860.359243    | 1430.683259      | H    | 664.327382  | 332.667329      | 647.300833     | 324.154054       | 646.316817     | 323.662046       | 5  |
| 22 | 2979.417487 | 1490.212381     | 2962.390938    | 1481.699107      | 2961.406922    | 1481.207099      | T    | 527.268470  | 264.137873      | 510.241921     | 255.624598       | 509.257905     | 255.132590       | 4  |
| 23 | 3116.476399 | 1558.741837     | 3099.449850    | 1550.228563      | 3098.465834    | 1549.736555      | H    | 426.220791  | 213.614033      | 409.194242     | 205.100759       |                |                  | 3  |
| 24 | 3230.519326 | 1615.763301     | 3213.492777    | 1607.250026      | 3212.508761    | 1606.758018      | N    | 289.161879  | 145.084577      | 272.135330     | 136.571303       |                |                  | 2  |
| 25 |             |                 |                |                  |                |                  | R    | 175.118952  | 88.063114       | 158.092403     | 79.549839        |                |                  | 1  |

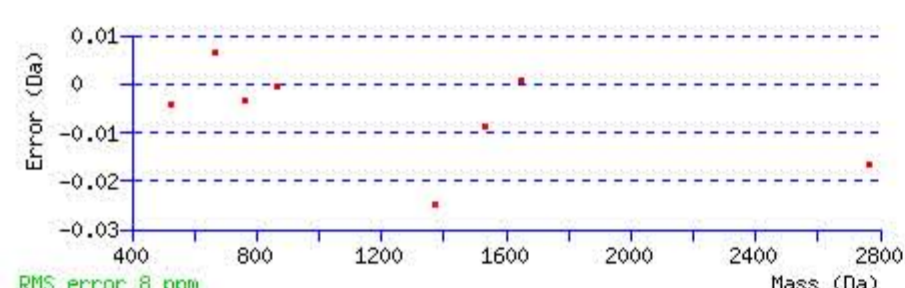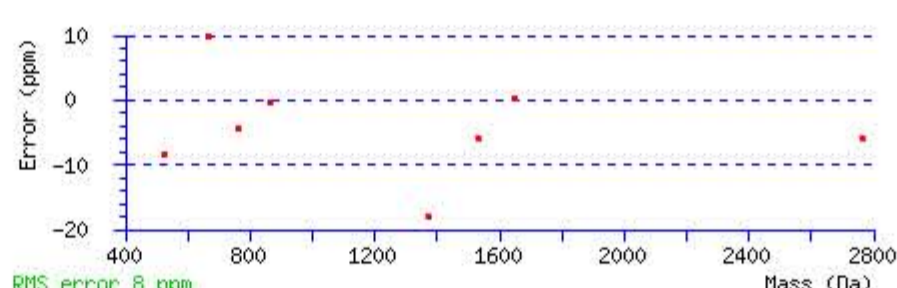

NCBI BLAST search of **GNVAVTVSGHTCQHWSAQTPHTHNR**

(Parameters: blastp, nr protein database, expect=20000, no filter, PAM30)

Other BLAST [web gateways](#)

All matches to this query

| Score | Mr(calc):   | Delta     | Sequence                                  |
|-------|-------------|-----------|-------------------------------------------|
| 25.1  | 3403.623764 | -0.003320 | <a href="#">GNVAVTVSGHTCQHWSAQTPHTHNR</a> |

Mascot: <http://www.matrixscience.com/>

**MASCOT** Mascot Search Results

Peptide View

MS/MS Fragmentation of **VQSTELCAGHLAGGTDSCQGDSGGPLVCFEK**  
 Found in **PLMN\_HUMAN**, Plasminogen OS=Homo sapiens GN=PLG PE=1 SV=2

Match to Query 59885: 3547.630632 from(1183.550820,3+) rtinseconds(2180) index(61552)  
 Title: Locus:1.1.1.1670.13 File:"2013-07-02 CLN FXIII 180 min 3rd FT.wiff"  
 Data file C:\Program Files (x86)\Matrix Science\Mascot Daemon\mgf9 FXIII 180 min 3rd\mascot\_daemon\_merge.mgf

Click mouse within plot area to zoom in by factor of two about that point  
 Or, Plot from  to  Da   
 Label all possible matches  Label matches used for scoring

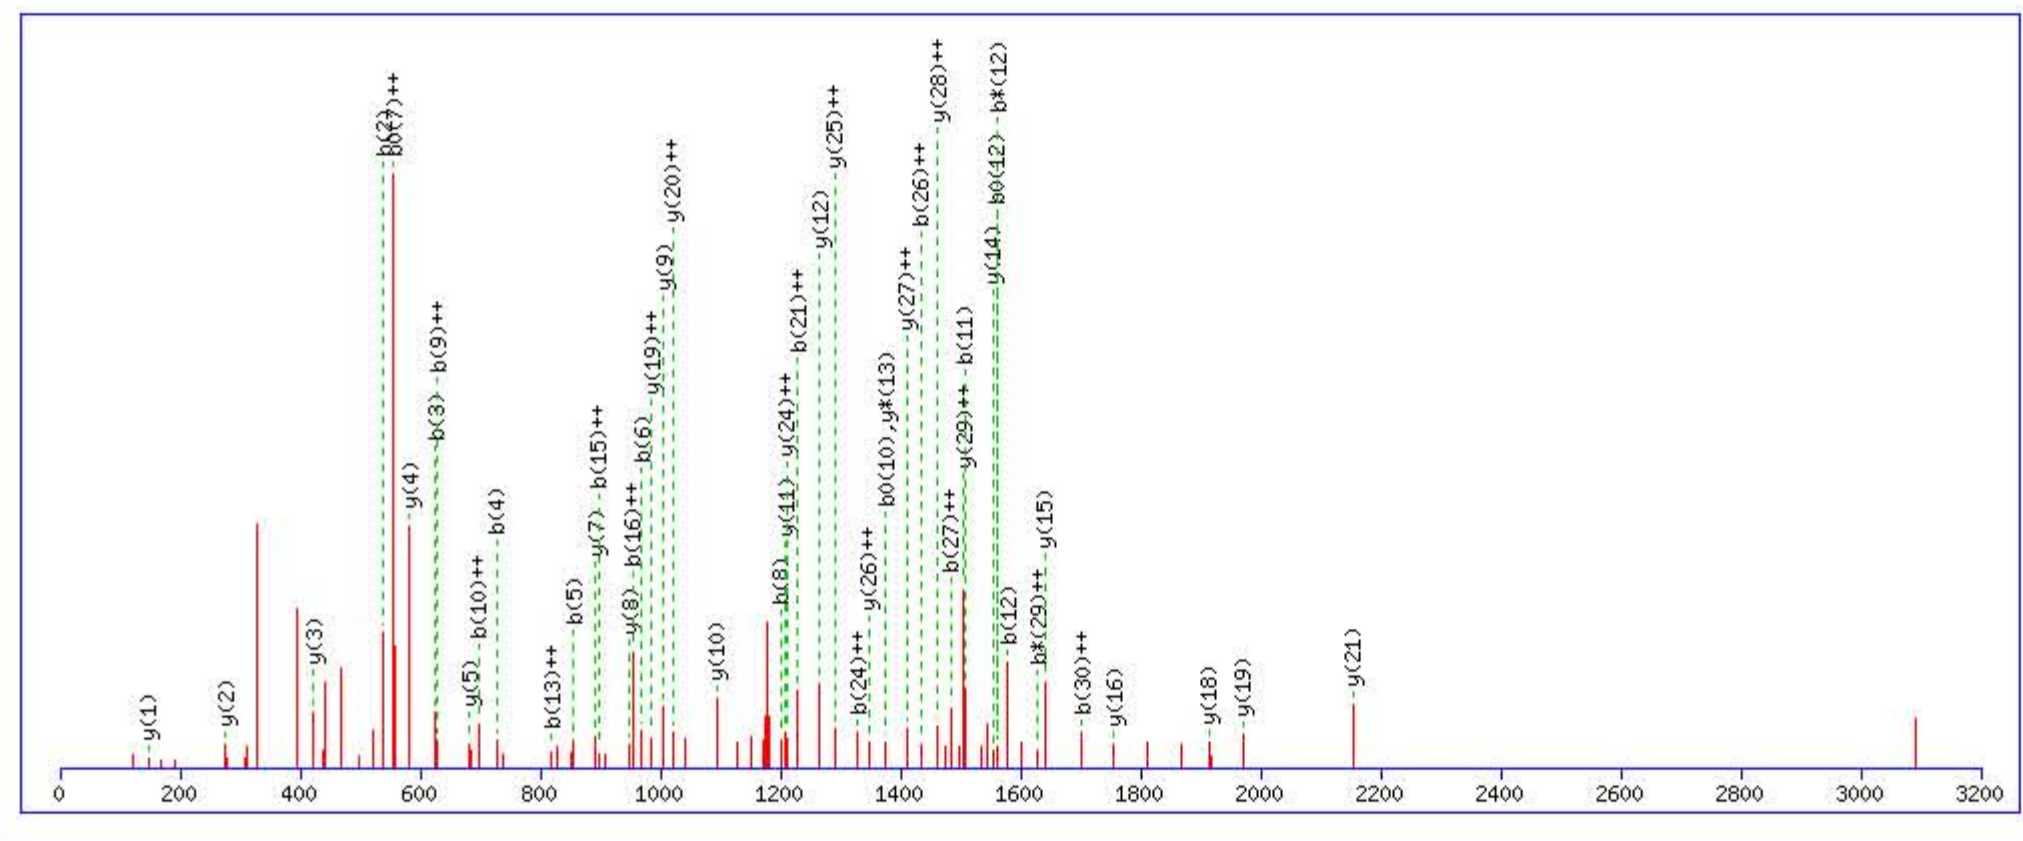

Monoisotopic mass of neutral peptide Mr(calc): 3547.584061  
 Fixed modifications: Carbamidomethyl (C) (apply to specified residues or termini only)  
 Variable modifications:  
 Q2 : Biotin:Thermo-21345 (Q)  
 Ions Score: 83 Expect: 6.8e-008  
 Matches : 49/352 fragment ions using 103 most intense peaks ([help](#))

| #  | b                  | b <sup>++</sup>    | b <sup>*</sup>     | b <sup>*++</sup>   | b <sup>0</sup>     | b <sup>0++</sup>  | Seq. | y                  | y <sup>++</sup>    | y <sup>*</sup>     | y <sup>*++</sup> | y <sup>0</sup> | y <sup>0++</sup> | #  |
|----|--------------------|--------------------|--------------------|--------------------|--------------------|-------------------|------|--------------------|--------------------|--------------------|------------------|----------------|------------------|----|
| 1  | 100.075690         | 50.541483          |                    |                    |                    |                   | V    |                    |                    |                    |                  |                |                  | 31 |
| 2  | <b>539.301016</b>  | 270.154146         | 522.274467         | 261.640872         |                    |                   | Q    | 3449.522877        | 1725.265076        | 3432.496328        | 1716.751802      | 3431.512312    | 1716.259794      | 30 |
| 3  | <b>626.333044</b>  | 313.670160         | 609.306495         | 305.156886         | 608.322479         | 304.664878        | S    | 3010.297551        | <b>1505.652413</b> | 2993.271002        | 1497.139139      | 2992.286986    | 1496.647131      | 29 |
| 4  | <b>727.380723</b>  | 364.194000         | 710.354174         | 355.680725         | 709.370158         | 355.188717        | T    | 2923.265523        | <b>1462.136399</b> | 2906.238974        | 1453.623125      | 2905.254958    | 1453.131117      | 28 |
| 5  | <b>856.423316</b>  | 428.715296         | 839.396767         | 420.202022         | 838.412751         | 419.710014        | E    | 2822.217844        | <b>1411.612560</b> | 2805.191295        | 1403.099285      | 2804.207279    | 1402.607277      | 27 |
| 6  | <b>969.507380</b>  | 485.257328         | 952.480831         | 476.744054         | 951.496815         | 476.252046        | L    | 2693.175251        | <b>1347.091263</b> | 2676.148702        | 1338.577989      | 2675.164686    | 1338.085981      | 26 |
| 7  | 1129.538029        | 565.272653         | 1112.511480        | 556.759378         | 1111.527464        | <b>556.267370</b> | C    | 2580.091187        | <b>1290.549231</b> | 2563.064638        | 1282.035957      | 2562.080622    | 1281.543949      | 25 |
| 8  | <b>1200.575143</b> | 600.791210         | 1183.548594        | 592.277935         | 1182.564578        | 591.785927        | A    | 2420.060538        | <b>1210.533907</b> | 2403.033989        | 1202.020632      | 2402.049973    | 1201.528624      | 24 |
| 9  | 1257.596607        | <b>629.301942</b>  | 1240.570058        | 620.788667         | 1239.586042        | 620.296659        | G    | 2349.023424        | 1175.015350        | 2331.996875        | 1166.502075      | 2331.012859    | 1166.010067      | 23 |
| 10 | 1394.655519        | <b>697.831397</b>  | 1377.628970        | 689.318123         | <b>1376.644954</b> | 688.826115        | H    | 2292.001960        | 1146.504618        | 2274.975411        | 1137.991343      | 2273.991395    | 1137.499335      | 22 |
| 11 | <b>1507.739583</b> | 754.373429         | 1490.713034        | 745.860155         | 1489.729018        | 745.368147        | L    | <b>2154.943048</b> | 1077.975162        | 2137.916499        | 1069.461887      | 2136.932483    | 1068.969879      | 21 |
| 12 | <b>1578.776697</b> | 789.891986         | <b>1561.750148</b> | 781.378712         | <b>1560.766132</b> | 780.886704        | A    | 2041.858984        | <b>1021.433130</b> | 2024.832435        | 1012.919855      | 2023.848419    | 1012.427847      | 20 |
| 13 | 1635.798161        | <b>818.402718</b>  | 1618.771612        | 809.889444         | 1617.787596        | 809.397436        | G    | <b>1970.821870</b> | <b>985.914573</b>  | 1953.795321        | 977.401298       | 1952.811305    | 976.909290       | 19 |
| 14 | 1692.819625        | 846.913450         | 1675.793076        | 838.400176         | 1674.809060        | 837.908168        | G    | <b>1913.800406</b> | 957.403841         | 1896.773857        | 948.890566       | 1895.789841    | 948.398558       | 18 |
| 15 | 1793.867304        | <b>897.437290</b>  | 1776.840755        | 888.924015         | 1775.856739        | 888.432007        | T    | 1856.778942        | 928.893109         | 1839.752393        | 920.379835       | 1838.768377    | 919.887826       | 17 |
| 16 | 1908.894247        | <b>954.950761</b>  | 1891.867698        | 946.437487         | 1890.883682        | 945.945479        | D    | <b>1755.731263</b> | 878.369269         | 1738.704714        | 869.855995       | 1737.720698    | 869.363987       | 16 |
| 17 | 1995.926275        | 998.466775         | 1978.899726        | 989.953501         | 1977.915710        | 989.461493        | S    | <b>1640.704320</b> | 820.855798         | 1623.677771        | 812.342523       | 1622.693755    | 811.850515       | 15 |
| 18 | 2155.956924        | 1078.482100        | 2138.930375        | 1069.968825        | 2137.946359        | 1069.476817       | C    | <b>1553.672292</b> | 777.339784         | 1536.645743        | 768.826509       | 1535.661727    | 768.334501       | 14 |
| 19 | 2284.015502        | 1142.511389        | 2266.988953        | 1133.998114        | 2266.004937        | 1133.506106       | Q    | 1393.641643        | 697.324459         | <b>1376.615094</b> | 688.811185       | 1375.631078    | 688.319177       | 13 |
| 20 | 2341.036966        | 1171.022121        | 2324.010417        | 1162.508846        | 2323.026401        | 1162.016838       | G    | <b>1265.583065</b> | 633.295170         | 1248.556516        | 624.781896       | 1247.572500    | 624.289888       | 12 |
| 21 | 2456.063909        | <b>1228.535592</b> | 2439.037360        | 1220.022318        | 2438.053344        | 1219.530310       | D    | <b>1208.561601</b> | 604.784438         | 1191.535052        | 596.271164       | 1190.551036    | 595.779156       | 11 |
| 22 | 2543.095937        | 1272.051606        | 2526.069388        | 1263.538332        | 2525.085372        | 1263.046324       | S    | <b>1093.534658</b> | 547.270967         | 1076.508109        | 538.757692       | 1075.524093    | 538.265684       | 10 |
| 23 | 2600.117401        | 1300.562338        | 2583.090852        | 1292.049064        | 2582.106836        | 1291.557056       | G    | <b>1006.502630</b> | 503.754953         | 989.476081         | 495.241678       | 988.492065     | 494.749670       | 9  |
| 24 | 2657.138865        | <b>1329.073070</b> | 2640.112316        | 1320.559796        | 2639.128300        | 1320.067788       | G    | <b>949.481166</b>  | 475.244221         | 932.454617         | 466.730946       | 931.470601     | 466.238938       | 8  |
| 25 | 2754.191629        | 1377.599452        | 2737.165080        | 1369.086178        | 2736.181064        | 1368.594170       | P    | <b>892.459702</b>  | 446.733489         | 875.433153         | 438.220214       | 874.449137     | 437.728206       | 7  |
| 26 | 2867.275693        | <b>1434.141484</b> | 2850.249144        | 1425.628210        | 2849.265128        | 1425.136202       | L    | 795.406938         | 398.207107         | 778.380389         | 389.693832       | 777.396373     | 389.201824       | 6  |
| 27 | 2966.344107        | <b>1483.675691</b> | 2949.317558        | 1475.162417        | 2948.333542        | 1474.670409       | V    | <b>682.322874</b>  | 341.665075         | 665.296325         | 333.151800       | 664.312309     | 332.659792       | 5  |
| 28 | 3126.374756        | 1563.691016        | 3109.348207        | 1555.177741        | 3108.364191        | 1554.685733       | C    | <b>583.254460</b>  | 292.130868         | 566.227911         | 283.617593       | 565.243895     | 283.125585       | 4  |
| 29 | 3273.443170        | 1637.225223        | 3256.416621        | <b>1628.711948</b> | 3255.432605        | 1628.219940       | F    | <b>423.223811</b>  | 212.115543         | 406.197262         | 203.602269       | 405.213246     | 203.110261       | 3  |
| 30 | 3402.485763        | <b>1701.746519</b> | 3385.459214        | 1693.233245        | 3384.475198        | 1692.741237       | E    | <b>276.155397</b>  | 138.581337         | 259.128848         | 130.068062       | 258.144832     | 129.576054       | 2  |
| 31 |                    |                    |                    |                    |                    |                   | K    | <b>147.112804</b>  | 74.060040          | 130.086255         | 65.546765        |                |                  | 1  |

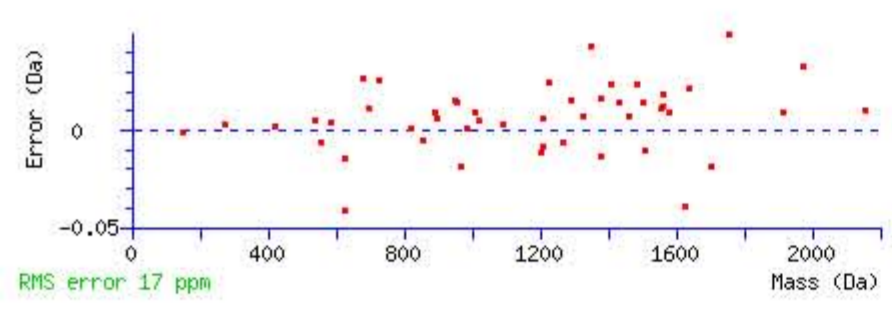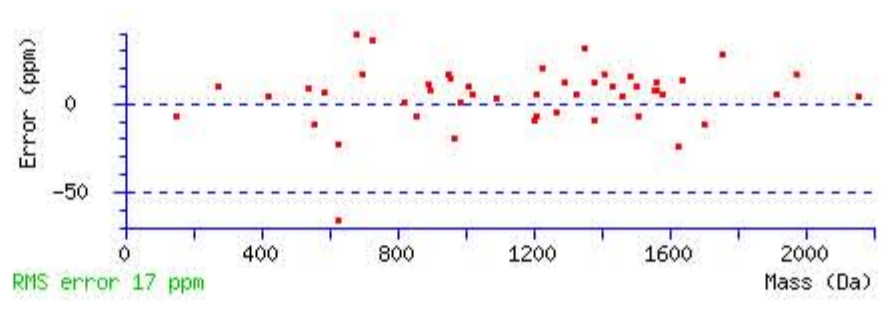

NCBI BLAST search of **VQSTELCAGHLAGGTDSCQGDSGGPLVCFEK**  
 (Parameters: blastp, nr protein database, expect=20000, no filter, PAM30)  
 Other BLAST [web gateways](#)

All matches to this query

| Score | Mr(calc):   | Delta    | Sequence                                        |
|-------|-------------|----------|-------------------------------------------------|
| 82.6  | 3547.584061 | 0.046571 | <a href="#">VQSTELCAGHLAGGTDSCQGDSGGPLVCFEK</a> |
| 4.9   | 3547.584061 | 0.046571 | <a href="#">VQSTELCAGHLAGGTDSCQGDSGGPLVCFEK</a> |



# MASCOT SEARCH RESULTS

## Peptide View

MS/MS Fragmentation of **TNTQPFDLQVYHPSR**

Found in **LRP1\_HUMAN**, Prolow-density lipoprotein receptor-related protein 1 OS=Homo sapiens GN=LRP1 PE=1 SV=2

Match to Query 41792: 2113.047342 from(705.356390,3+) rtinseconds(2116) index(46692)

Title: Locus:1.1.1.3449.10 File:"2013-07-02 CLN FXIII 180 min 3rd F 4.wiff"

Data file C:\Program Files (x86)\Matrix Science\Mascot Daemon\mgf\9 FXIII 180 min 3rd\mascot\_daemon\_merge.mgf

Click mouse within plot area to zoom in by factor of two about that point

Or, Plot from  to  Da

Label all possible matches  Label matches used for scoring

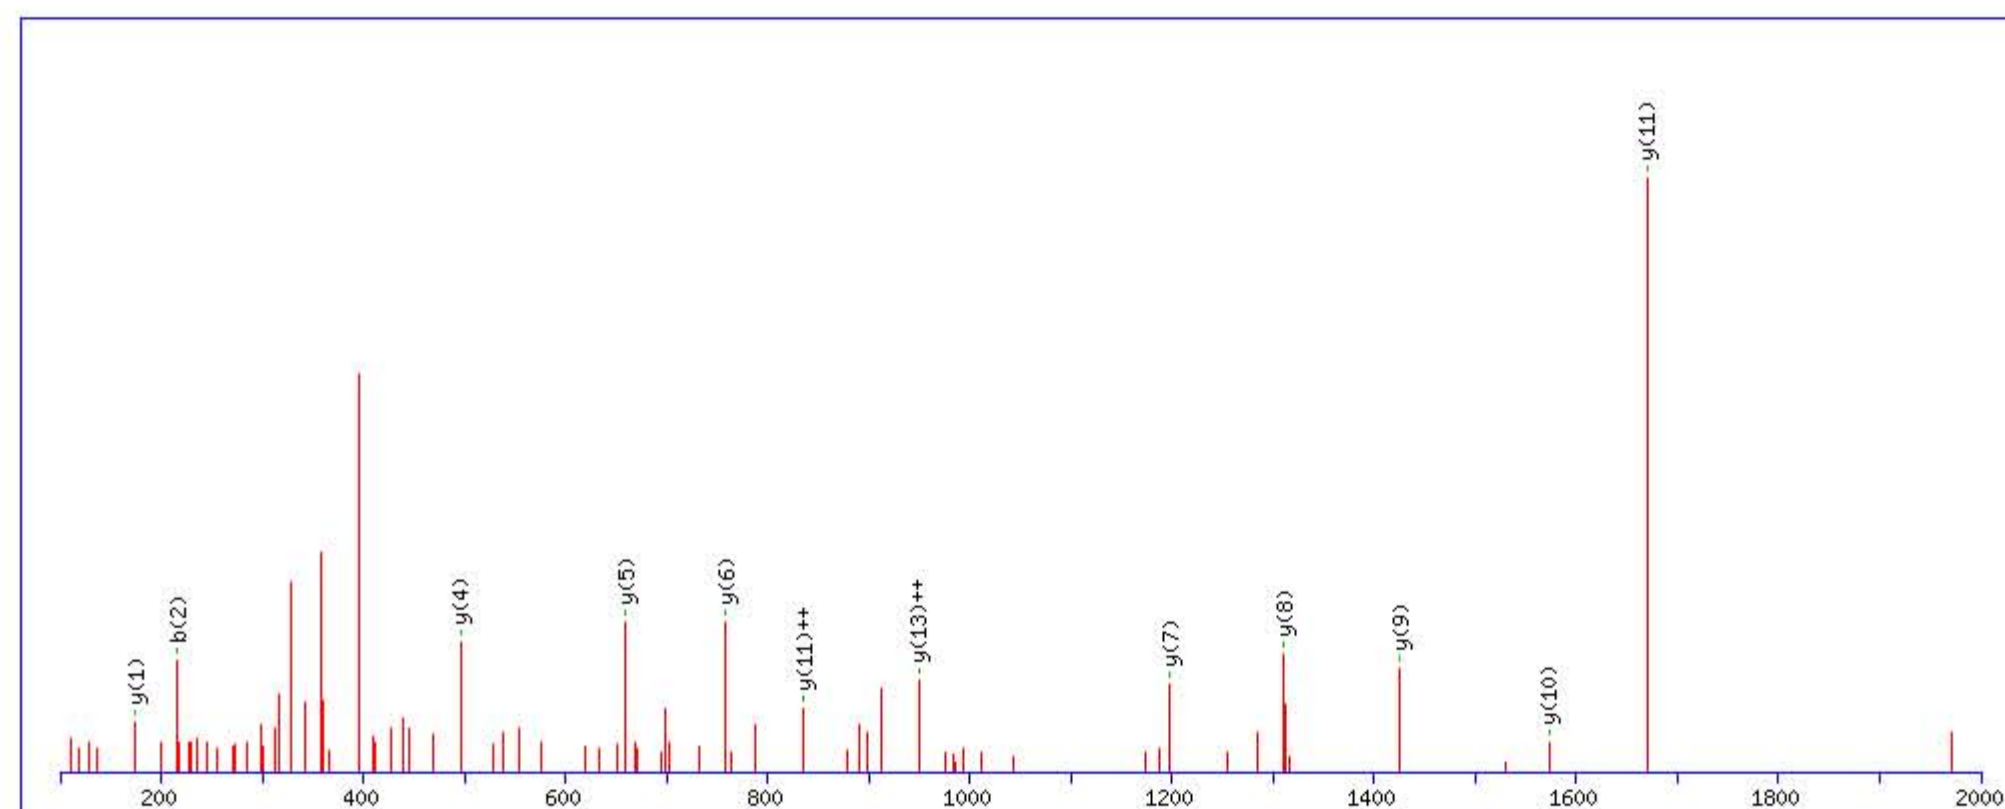

Monoisotopic mass of neutral peptide Mr(calc): 2113.041504

Fixed modifications: Carbamidomethyl (C) (apply to specified residues or termini only)

Variable modifications:

Q9 : Biotin:Thermo-21345 (Q)

Ions Score: 62 Expect: 1.7e-005

Matches : 12/164 fragment ions using 17 most intense peaks [\(help\)](#)

| #  | b                 | b <sup>++</sup> | b <sup>+</sup> | b <sup>+++</sup> | b <sup>0</sup> | b <sup>0++</sup> | Seq. | y                  | y <sup>++</sup>   | y <sup>+</sup> | y <sup>+++</sup> | y <sup>0</sup> | y <sup>0++</sup> | #  |
|----|-------------------|-----------------|----------------|------------------|----------------|------------------|------|--------------------|-------------------|----------------|------------------|----------------|------------------|----|
| 1  | 102.054955        | 51.531116       |                |                  | 84.044390      | 42.525833        | T    |                    |                   |                |                  |                |                  | 15 |
| 2  | <b>216.097882</b> | 108.552579      | 199.071333     | 100.039305       | 198.087317     | 99.547296        | N    | 2013.001094        | 1007.004185       | 1995.974545    | 998.490911       | 1994.990529    | 997.998903       | 14 |
| 3  | 317.145561        | 159.076418      | 300.119012     | 150.563144       | 299.134996     | 150.071136       | T    | 1898.958167        | <b>949.982722</b> | 1881.931618    | 941.469447       | 1880.947602    | 940.977439       | 13 |
| 4  | 445.204139        | 223.105707      | 428.177590     | 214.592433       | 427.193574     | 214.100425       | Q    | 1797.910488        | 899.458882        | 1780.883939    | 890.945608       | 1779.899923    | 890.453600       | 12 |
| 5  | 542.256903        | 271.632090      | 525.230354     | 263.118815       | 524.246338     | 262.626807       | P    | <b>1669.851910</b> | <b>835.429593</b> | 1652.825361    | 826.916319       | 1651.841345    | 826.424311       | 11 |
| 6  | 689.325317        | 345.166297      | 672.298768     | 336.653022       | 671.314752     | 336.161014       | F    | <b>1572.799146</b> | 786.903211        | 1555.772597    | 778.389937       | 1554.788581    | 777.897929       | 10 |
| 7  | 804.352260        | 402.679768      | 787.325711     | 394.166494       | 786.341695     | 393.674486       | D    | <b>1425.730732</b> | 713.369004        | 1408.704183    | 704.855730       | 1407.720167    | 704.363722       | 9  |
| 8  | 917.436324        | 459.221800      | 900.409775     | 450.708526       | 899.425759     | 450.216518       | L    | <b>1310.703789</b> | 655.855533        | 1293.677240    | 647.342258       | 1292.693224    | 646.850250       | 8  |
| 9  | 1356.661650       | 678.834463      | 1339.635101    | 670.321189       | 1338.651085    | 669.829181       | Q    | <b>1197.619725</b> | 599.313501        | 1180.593176    | 590.800226       | 1179.609160    | 590.308218       | 7  |
| 10 | 1455.730064       | 728.368670      | 1438.703515    | 719.855396       | 1437.719499    | 719.363388       | V    | <b>758.394399</b>  | 379.700838        | 741.367850     | 371.187563       | 740.383834     | 370.695555       | 6  |
| 11 | 1618.793393       | 809.900335      | 1601.766844    | 801.387060       | 1600.782828    | 800.895052       | Y    | <b>659.325985</b>  | 330.166631        | 642.299436     | 321.653356       | 641.315420     | 321.161348       | 5  |
| 12 | 1755.852305       | 878.429791      | 1738.825756    | 869.916516       | 1737.841740    | 869.424508       | H    | <b>496.262656</b>  | 248.634966        | 479.236107     | 240.121692       | 478.252091     | 239.629684       | 4  |
| 13 | 1852.905069       | 926.956173      | 1835.878520    | 918.442898       | 1834.894504    | 917.950890       | P    | 359.203744         | 180.105510        | 342.177195     | 171.592236       | 341.193179     | 171.100228       | 3  |
| 14 | 1939.937097       | 970.472187      | 1922.910548    | 961.958912       | 1921.926532    | 961.466904       | S    | 262.150980         | 131.579128        | 245.124431     | 123.065854       | 244.140415     | 122.573846       | 2  |
| 15 |                   |                 |                |                  |                |                  | R    | <b>175.118952</b>  | 88.063114         | 158.092403     | 79.549840        |                |                  | 1  |

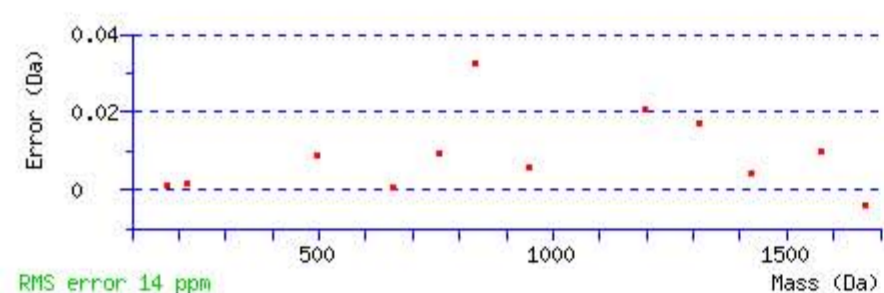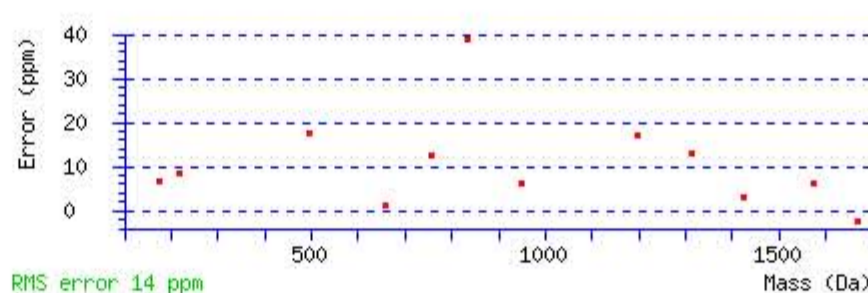

NCBI BLAST search of **TNTQPFDLQVYHPSR**

(Parameters: blastp, nr protein database, expect=20000, no filter, PAM30)

Other BLAST [web gateways](#)

All matches to this query

| Score | Mr(calc):   | Delta    | Sequence                        |
|-------|-------------|----------|---------------------------------|
| 61.9  | 2113.041504 | 0.005838 | <a href="#">TNTQPFDLQVYHPSR</a> |
| 5.0   | 2113.041504 | 0.005838 | <a href="#">TNTQPFDLQVYHPSR</a> |

Mascot: <http://www.matrixscience.com/>

# MASCOT Search Results

## Peptide View

MS/MS Fragmentation of **TCNHPVPQHGGPFCAGDATR**

Found in **PROP\_HUMAN**, Properdin OS=Homo sapiens GN=CFP PE=1 SV=2

Match to Query 48194: 2489.111296 from(623.285100,4+) rtinseconds(1528) index(58124)

Title: Locus:1.1.1.1443.16 File:"2013-07-02 CLN FXIII 180 min 3rd FT.wiff"

Data file C:\Program Files (x86)\Matrix Science\Mascot Daemon\mgf\9 FXIII 180 min 3rd\mascot\_daemon\_merge.mgf

Click mouse within plot area to zoom in by factor of two about that point

Or, Plot from  to  Da

Label all possible matches  Label matches used for scoring

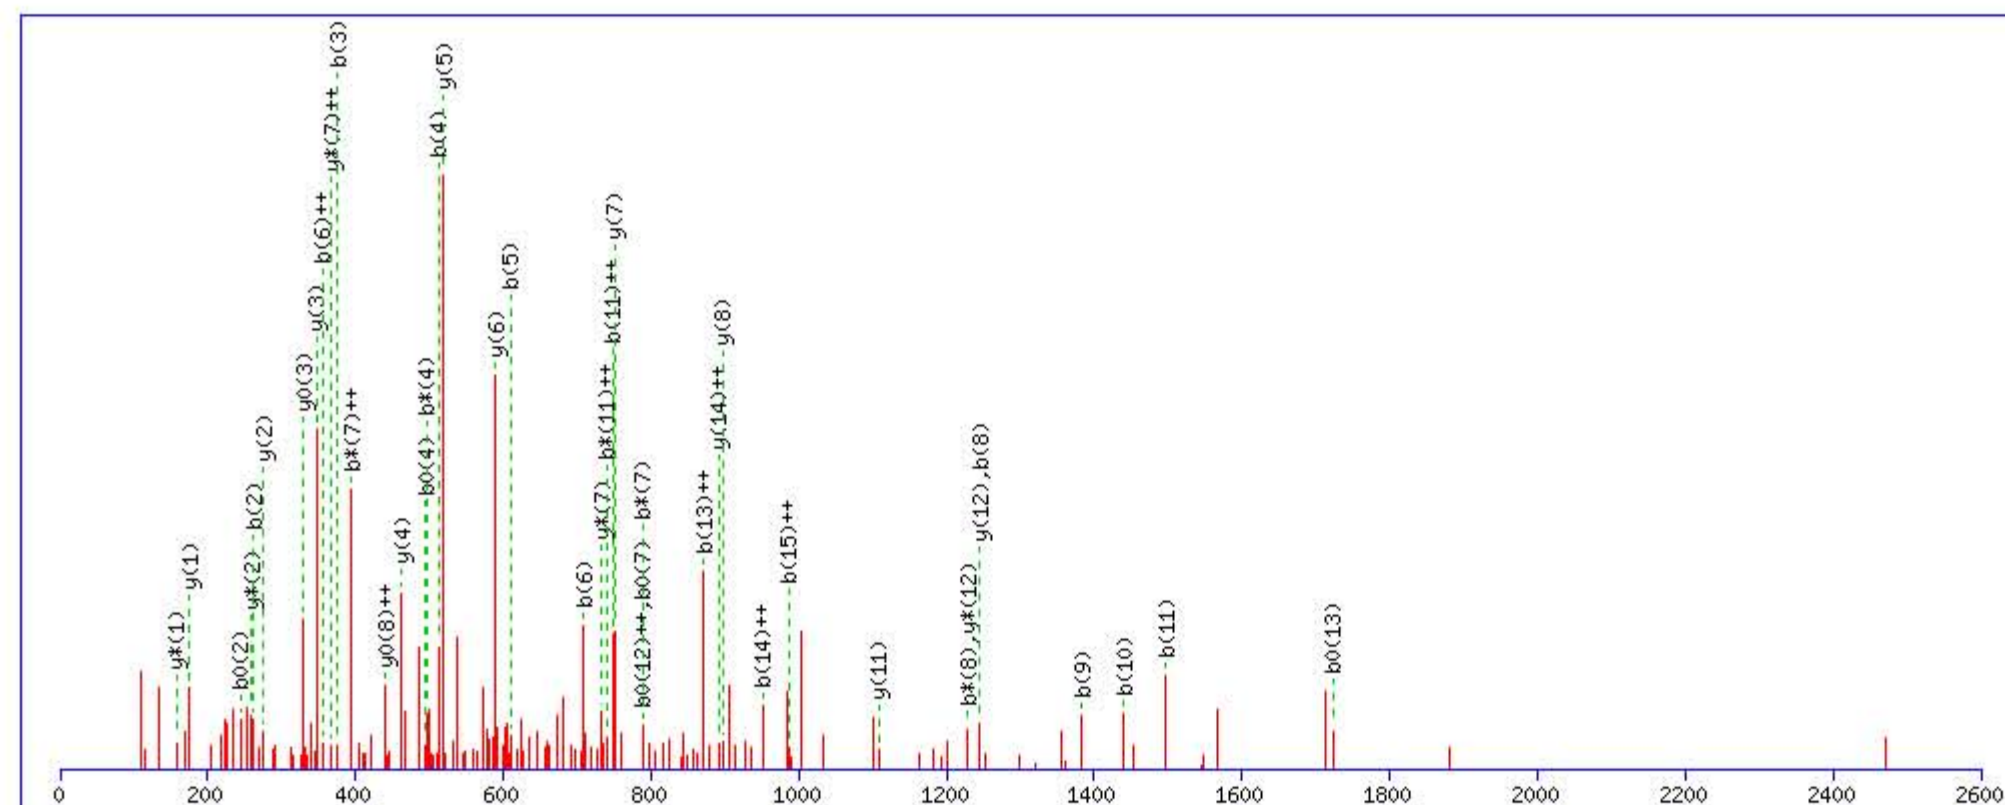

Monoisotopic mass of neutral peptide Mr(calc): 2489.115128

Fixed modifications: Carbamidomethyl (C) (apply to specified residues or termini only)

Variable modifications:

Q8 : Biotin:Thermo-21345 (Q)

Ions Score: 45 Expect: 0.00022

Matches : 42/222 fragment ions using 108 most intense peaks [\(help\)](#)

| #  | b                  | b <sup>++</sup>   | b <sup>+</sup>     | b <sup>+++</sup>  | b <sup>0</sup>     | b <sup>0++</sup>  | Seq. | y                  | y <sup>++</sup>   | y <sup>+</sup>     | y <sup>+++</sup>  | y <sup>0</sup>    | y <sup>0++</sup>  | #  |
|----|--------------------|-------------------|--------------------|-------------------|--------------------|-------------------|------|--------------------|-------------------|--------------------|-------------------|-------------------|-------------------|----|
| 1  | 102.054955         | 51.531116         |                    |                   | 84.044390          | 42.525833         | T    |                    |                   |                    |                   |                   |                   | 20 |
| 2  | <b>262.085604</b>  | 131.546440        |                    |                   | <b>244.075039</b>  | 122.541158        | C    | 2389.074689        | 1195.040982       | 2372.048140        | 1186.527708       | 2371.064124       | 1186.035700       | 19 |
| 3  | <b>376.128531</b>  | 188.567904        | 359.101982         | 180.054629        | 358.117966         | 179.562621        | N    | 2229.044040        | 1115.025658       | 2212.017491        | 1106.512383       | 2211.033475       | 1106.020375       | 18 |
| 4  | <b>513.187443</b>  | 257.097360        | <b>496.160894</b>  | 248.584085        | <b>495.176878</b>  | 248.092077        | H    | 2115.001113        | 1058.004194       | 2097.974564        | 1049.490920       | 2096.990548       | 1048.998912       | 17 |
| 5  | <b>610.240207</b>  | 305.623742        | 593.213658         | 297.110467        | 592.229642         | 296.618459        | P    | 1977.942201        | 989.474739        | 1960.915652        | 980.961464        | 1959.931636       | 980.469456        | 16 |
| 6  | <b>709.308621</b>  | <b>355.157949</b> | 692.282072         | 346.644674        | 691.298056         | 346.152666        | V    | 1880.889437        | 940.948357        | 1863.862888        | 932.435082        | 1862.878872       | 931.943074        | 15 |
| 7  | 806.361385         | 403.684331        | <b>789.334836</b>  | <b>395.171056</b> | <b>788.350820</b>  | 394.679048        | P    | 1781.821023        | <b>891.414150</b> | 1764.794474        | 882.900875        | 1763.810458       | 882.408867        | 14 |
| 8  | <b>1245.586711</b> | 623.296994        | <b>1228.560162</b> | 614.783719        | 1227.576146        | 614.291711        | Q    | 1684.768259        | 842.887768        | 1667.741710        | 834.374493        | 1666.757694       | 833.882485        | 13 |
| 9  | <b>1382.645623</b> | 691.826450        | 1365.619074        | 683.313175        | 1364.635058        | 682.821167        | H    | <b>1245.542933</b> | 623.275105        | <b>1228.516384</b> | 614.761830        | 1227.532368       | 614.269822        | 12 |
| 10 | <b>1439.667087</b> | 720.337182        | 1422.640538        | 711.823907        | 1421.656522        | 711.331899        | G    | <b>1108.484021</b> | 554.745649        | 1091.457472        | 546.232374        | 1090.473456       | 545.740366        | 11 |
| 11 | <b>1496.688551</b> | <b>748.847914</b> | 1479.662002        | <b>740.334639</b> | 1478.677986        | 739.842631        | G    | 1051.462557        | 526.234917        | 1034.436008        | 517.721642        | 1033.451992       | 517.229634        | 10 |
| 12 | 1593.741315        | 797.374296        | 1576.714766        | 788.861021        | 1575.730750        | <b>788.369013</b> | P    | 994.441093         | 497.724185        | 977.414544         | 489.210910        | 976.430528        | 488.718902        | 9  |
| 13 | 1740.809729        | <b>870.908503</b> | 1723.783180        | 862.395228        | <b>1722.799164</b> | 861.903220        | F    | <b>897.388329</b>  | 449.197803        | 880.361780         | 440.684528        | 879.377764        | <b>440.192520</b> | 8  |
| 14 | 1900.840378        | <b>950.923827</b> | 1883.813829        | 942.410553        | 1882.829813        | 941.918545        | C    | <b>750.319915</b>  | 375.663596        | <b>733.293366</b>  | <b>367.150321</b> | 732.309350        | 366.658313        | 7  |
| 15 | 1971.877492        | <b>986.442384</b> | 1954.850943        | 977.929110        | 1953.866927        | 977.437102        | A    | <b>590.289266</b>  | 295.648271        | 573.262717         | 287.134997        | 572.278701        | 286.642989        | 6  |
| 16 | 2028.898956        | 1014.953116       | 2011.872407        | 1006.439842       | 2010.888391        | 1005.947834       | G    | <b>519.252152</b>  | 260.129714        | 502.225603         | 251.616440        | 501.241587        | 251.124432        | 5  |
| 17 | 2143.925899        | 1072.466587       | 2126.899350        | 1063.953313       | 2125.915334        | 1063.461305       | D    | <b>462.230688</b>  | 231.618982        | 445.204139         | 223.105707        | 444.220123        | 222.613700        | 4  |
| 18 | 2214.963013        | 1107.985144       | 2197.936464        | 1099.471870       | 2196.952448        | 1098.979862       | A    | <b>347.203745</b>  | 174.105510        | 330.177196         | 165.592236        | <b>329.193180</b> | 165.100228        | 3  |
| 19 | 2316.010692        | 1158.508984       | 2298.984143        | 1149.995709       | 2298.000127        | 1149.503701       | T    | <b>276.166631</b>  | 138.586953        | <b>259.140082</b>  | 130.073679        | 258.156066        | 129.581671        | 2  |
| 20 |                    |                   |                    |                   |                    |                   | R    | <b>175.118952</b>  | 88.063114         | <b>158.092403</b>  | 79.549839         |                   |                   | 1  |

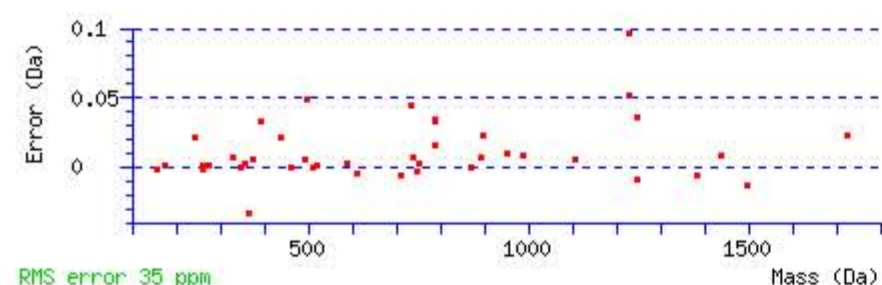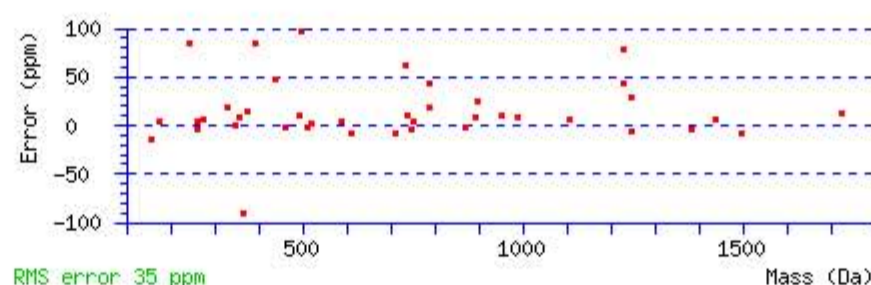

NCBI BLAST search of **TCNHPVPQHGGPFCAGDATR**

(Parameters: blastp, nr protein database, expect=20000, no filter, PAM30)

Other BLAST [web gateways](#)

All matches to this query

| Score | Mr(calc):   | Delta     | Sequence                             |
|-------|-------------|-----------|--------------------------------------|
| 45.1  | 2489.115128 | -0.003832 | <a href="#">TCNHPVPQHGGPFCAGDATR</a> |

Mascot: <http://www.matrixscience.com/>

# MASCOT SEARCH RESULTS

## Peptide View

MS/MS Fragmentation of **ECLQTCR**

Found in **AMBP\_HUMAN**, Protein AMBP OS=Homo sapiens GN=AMBP PE=1 SV=1

Match to Query 19690: 1276.565768 from(639.290160,2+) rtinseconds(1500) index(28834)

Title: Locus:1.1.1.3185.20 File:"2013-07-02 CLN FXIII 180 min 3rd F 3.wiff"

Data file C:\Program Files (x86)\Matrix Science\Mascot Daemon\mgf9 FXIII 180 min 3rd\mascot\_daemon\_merge.mgf

Click mouse within plot area to zoom in by factor of two about that point

Or, Plot from  to  Da

Label all possible matches  Label matches used for scoring

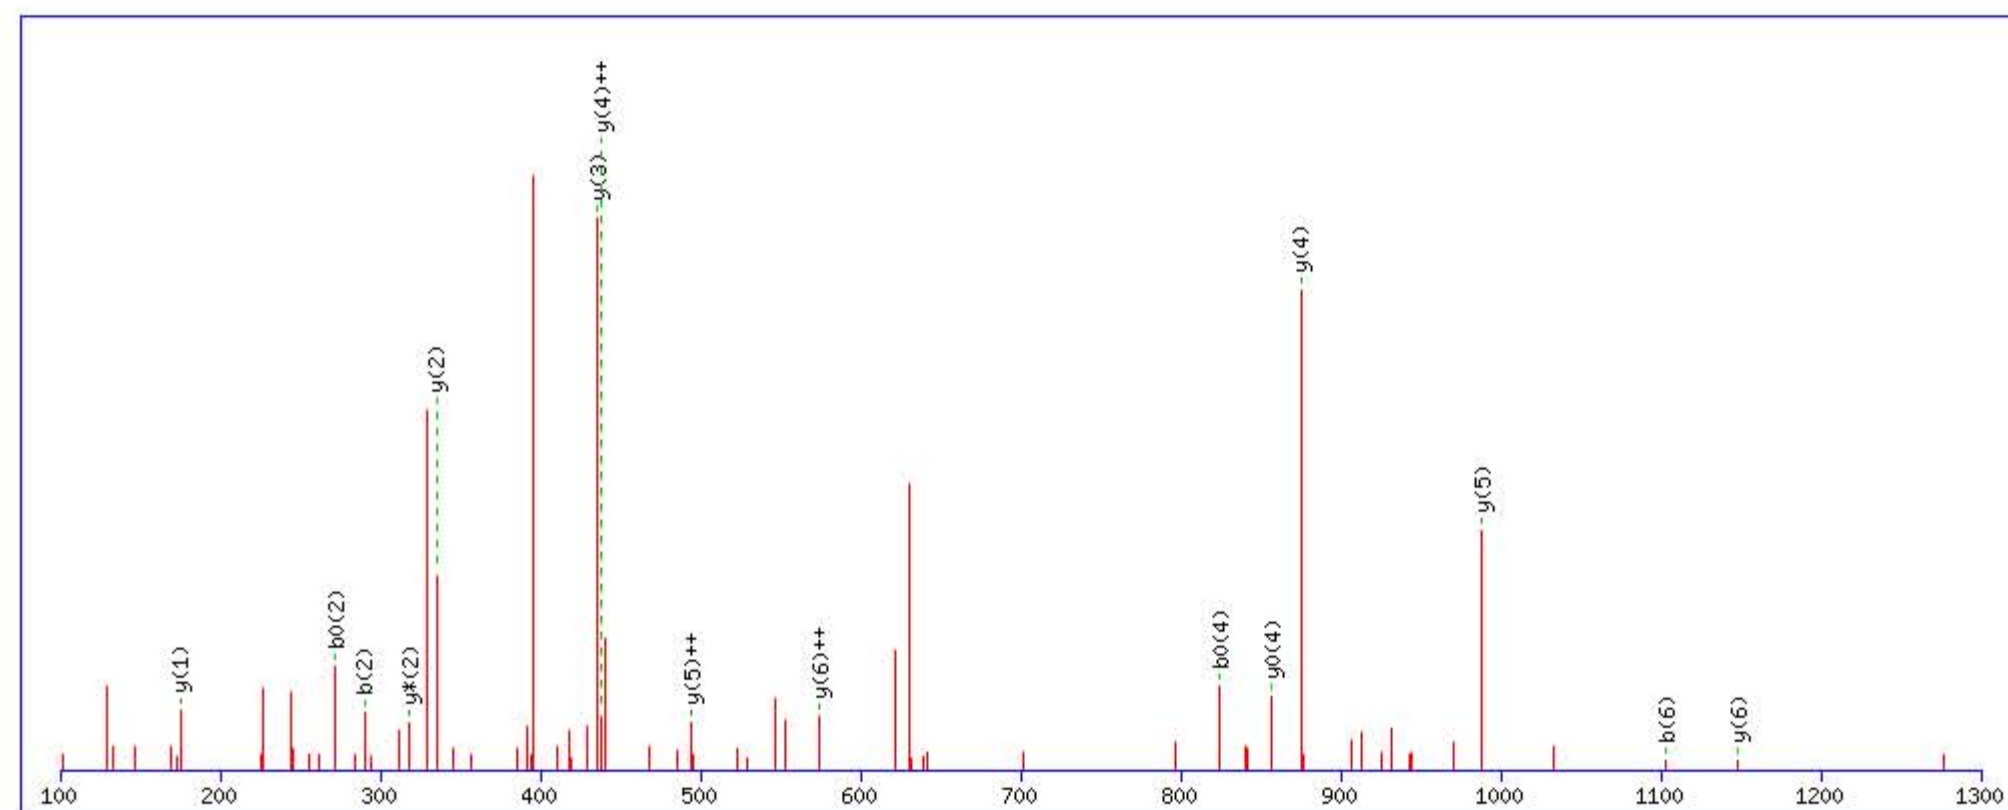

Monoisotopic mass of neutral peptide Mr(calc): 1276.572632

Fixed modifications: Carbamidomethyl (C) (apply to specified residues or termini only)

Variable modifications:

Q4 : Biotin:Thermo-21345 (Q)

Ions Score: 28 Expect: 0.016

Matches : 15/62 fragment ions using 37 most intense peaks [\(help\)](#)

| # | b                  | b <sup>++</sup> | b <sup>*</sup> | b <sup>*++</sup> | b <sup>0</sup>    | b <sup>0++</sup> | Seq. | y                  | y <sup>++</sup>   | y <sup>*</sup>    | y <sup>*++</sup> | y <sup>0</sup>    | y <sup>0++</sup> | # |
|---|--------------------|-----------------|----------------|------------------|-------------------|------------------|------|--------------------|-------------------|-------------------|------------------|-------------------|------------------|---|
| 1 | 130.049869         | 65.528572       |                |                  | 112.039304        | 56.523290        | E    |                    |                   |                   |                  |                   |                  | 7 |
| 2 | <b>290.080518</b>  | 145.543897      |                |                  | <b>272.069953</b> | 136.538615       | C    | <b>1148.537319</b> | <b>574.772298</b> | 1131.510770       | 566.259023       | 1130.526754       | 565.767015       | 6 |
| 3 | 403.164582         | 202.085929      |                |                  | 385.154017        | 193.080647       | L    | <b>988.506670</b>  | <b>494.756973</b> | 971.480121        | 486.243699       | 970.496105        | 485.751691       | 5 |
| 4 | 842.389908         | 421.698592      | 825.363359     | 413.185318       | <b>824.379343</b> | 412.693310       | Q    | <b>875.422606</b>  | <b>438.214941</b> | 858.396057        | 429.701667       | <b>857.412041</b> | 429.209659       | 4 |
| 5 | 943.437587         | 472.222432      | 926.411038     | 463.709157       | 925.427022        | 463.217149       | T    | <b>436.197280</b>  | 218.602278        | 419.170731        | 210.089003       | 418.186715        | 209.596995       | 3 |
| 6 | <b>1103.468236</b> | 552.237756      | 1086.441687    | 543.724482       | 1085.457671       | 543.232474       | C    | <b>335.149601</b>  | 168.078438        | <b>318.123052</b> | 159.565164       |                   |                  | 2 |
| 7 |                    |                 |                |                  |                   |                  | R    | <b>175.118952</b>  | 88.063114         | 158.092403        | 79.549839        |                   |                  | 1 |

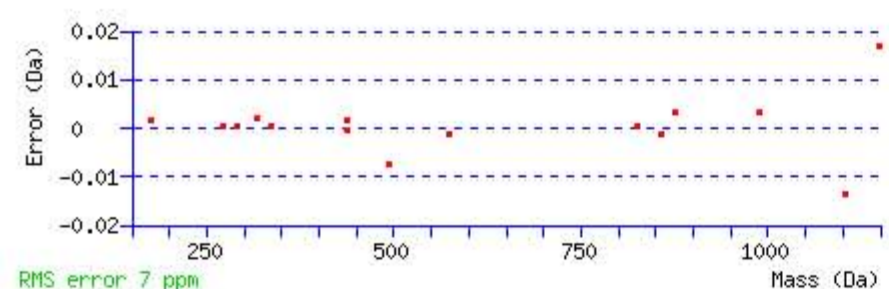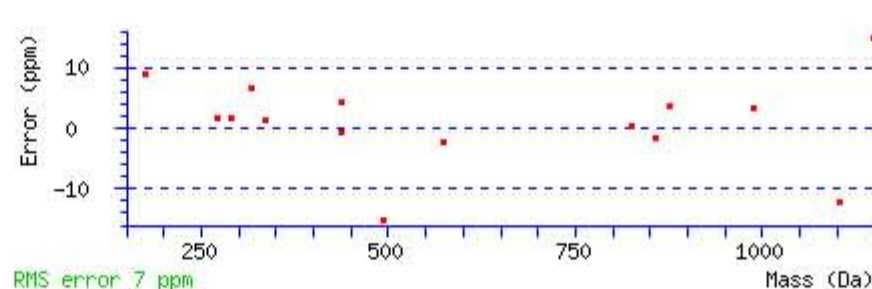

NCBI BLAST search of **ECLQTCR**

(Parameters: blastp, nr protein database, expect=20000, no filter, PAM30)

Other BLAST [web gateways](#)

All matches to this query

| Score | Mr(calc):   | Delta     | Sequence                      |
|-------|-------------|-----------|-------------------------------|
| 28.2  | 1276.572632 | -0.006864 | <a href="#">ECLQTCR</a>       |
| 8.5   | 1276.583862 | -0.018094 | <a href="#">KMSLSCHVCR</a>    |
| 6.2   | 1276.571762 | -0.005994 | <a href="#">AGAESPTMSVDGR</a> |
| 6.0   | 1276.553116 | 0.012652  | <a href="#">EDLDNASKDDR</a>   |
| 5.5   | 1276.569229 | -0.003461 | <a href="#">MTGRYEMYAR</a>    |
| 5.2   | 1276.579605 | -0.013837 | <a href="#">EEQRSPFNDR</a>    |
| 1.5   | 1276.560516 | 0.005252  | <a href="#">DEAEMSPVVER</a>   |
| 1.5   | 1276.560516 | 0.005252  | <a href="#">QQVPSEDSMEK</a>   |

# MASCOT Search Results

## Peptide View

MS/MS Fragmentation of **GECVPGEQEPELIPR**

Found in **AMBP\_HUMAN**, Protein AMBP OS=Homo sapiens GN=AMBP PE=1 SV=1

Match to Query 43791: 2230.108152 from(744.376660,3+) rtinseconds(2303) index(33625)

Title: Locus:1.1.1.3465.12 File:"2013-07-02 CLN FXIII 180 min 3rd F 3.wiff"

Data file C:\Program Files (x86)\Matrix Science\Mascot Daemon\mgf\9 FXIII 180 min 3rd\mascot\_daemon\_merge.mgf

Click mouse within plot area to zoom in by factor of two about that point

Or, Plot from  to  Da

Label all possible matches  Label matches used for scoring

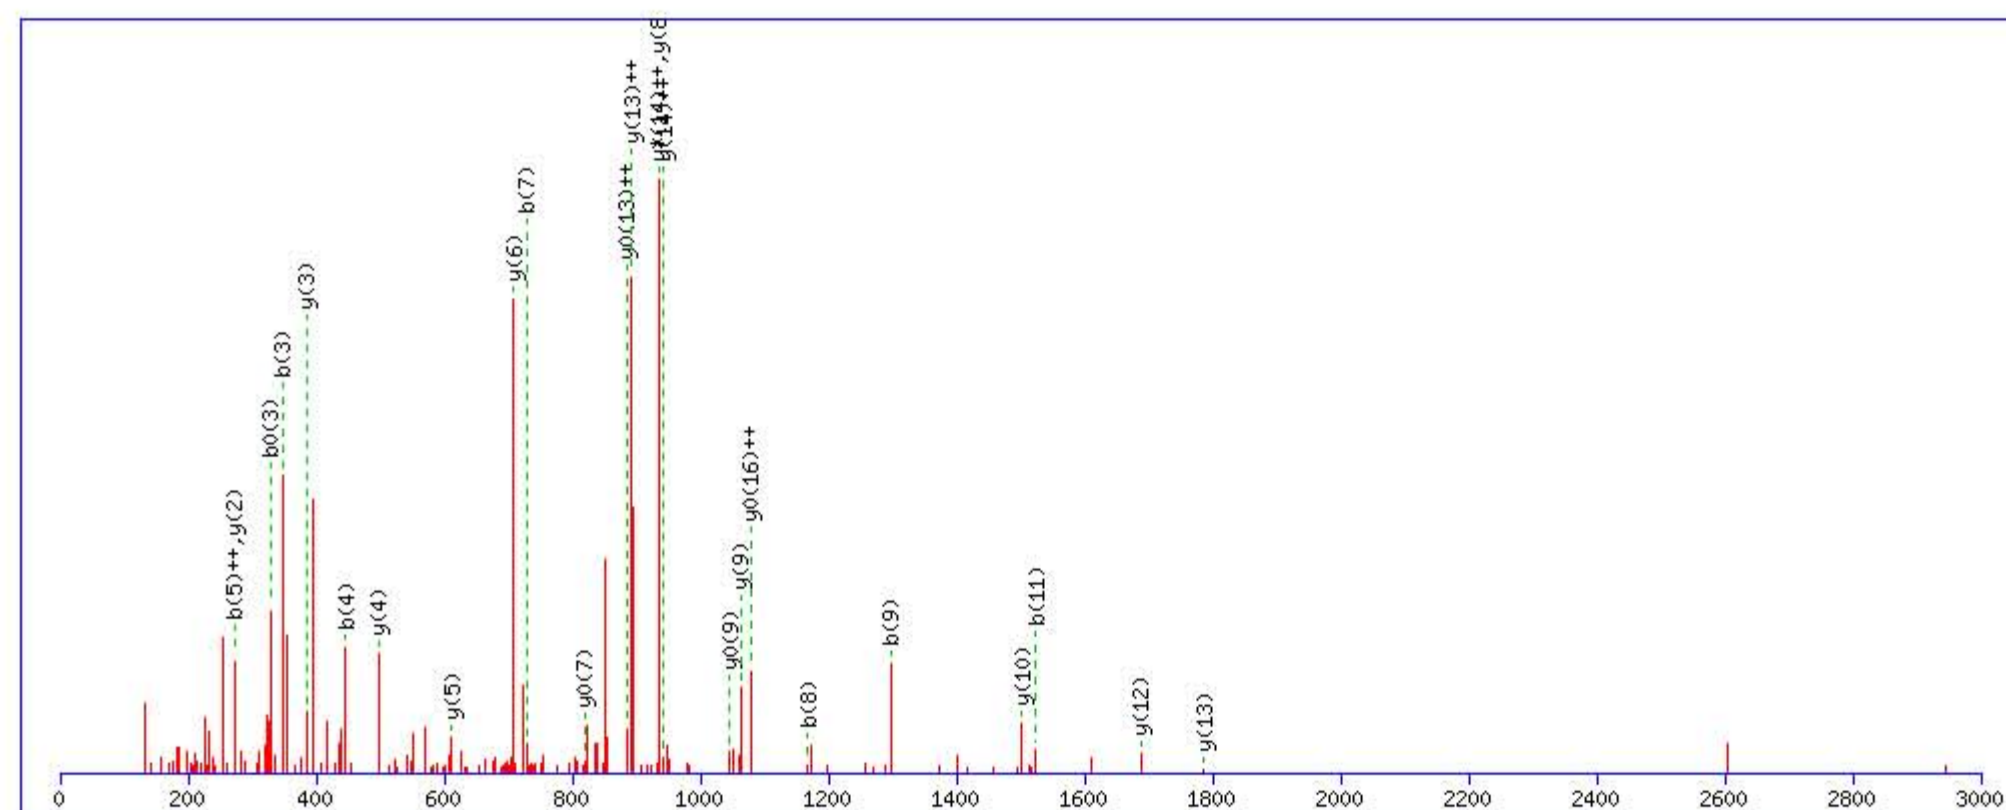

Monoisotopic mass of neutral peptide Mr(calc): 2230.112595

Fixed modifications: Carbamidomethyl (C) (apply to specified residues or termini only)

Variable modifications:

Q8 : Biotin:Thermo-21345 (Q)

Ions Score: 38 Expect: 0.00049

Matches : 25/164 fragment ions using 59 most intense peaks [\(help\)](#)

| #  | b                  | b <sup>++</sup>   | b <sup>+</sup> | b <sup>+++</sup> | b <sup>0</sup>    | b <sup>0++</sup> | Seq.     | y                  | y <sup>++</sup>   | y <sup>+</sup> | y <sup>+++</sup>  | y <sup>0</sup>     | y <sup>0++</sup>   | #  |
|----|--------------------|-------------------|----------------|------------------|-------------------|------------------|----------|--------------------|-------------------|----------------|-------------------|--------------------|--------------------|----|
| 1  | 58.028740          | 29.518008         |                |                  |                   |                  | <b>G</b> |                    |                   |                |                   |                    |                    | 17 |
| 2  | 187.071333         | 94.039305         |                |                  | 169.060768        | 85.034022        | <b>E</b> | 2174.098425        | 1087.552850       | 2157.071876    | 1079.039576       | 2156.087860        | <b>1078.547568</b> | 16 |
| 3  | <b>347.101982</b>  | 174.054629        |                |                  | <b>329.091417</b> | 165.049347       | <b>C</b> | 2045.055832        | 1023.031554       | 2028.029283    | 1014.518279       | 2027.045267        | 1014.026271        | 15 |
| 4  | <b>446.170396</b>  | 223.588836        |                |                  | 428.159831        | 214.583554       | <b>V</b> | 1885.025183        | <b>943.016229</b> | 1867.998634    | <b>934.502955</b> | 1867.014618        | 934.010947         | 14 |
| 5  | 543.223160         | <b>272.115218</b> |                |                  | 525.212595        | 263.109936       | <b>P</b> | <b>1785.956769</b> | <b>893.482022</b> | 1768.930220    | 884.968748        | 1767.946204        | <b>884.476740</b>  | 13 |
| 6  | 600.244624         | 300.625950        |                |                  | 582.234059        | 291.620668       | <b>G</b> | <b>1688.904005</b> | 844.955640        | 1671.877456    | 836.442366        | 1670.893440        | 835.950358         | 12 |
| 7  | <b>729.287217</b>  | 365.147247        |                |                  | 711.276652        | 356.141964       | <b>E</b> | 1631.882541        | 816.444908        | 1614.855992    | 807.931634        | 1613.871976        | 807.439626         | 11 |
| 8  | <b>1168.512543</b> | 584.759910        | 1151.485994    | 576.246635       | 1150.501978       | 575.754627       | <b>Q</b> | <b>1502.839948</b> | 751.923612        | 1485.813399    | 743.410337        | 1484.829383        | 742.918329         | 10 |
| 9  | <b>1297.555136</b> | 649.281206        | 1280.528587    | 640.767932       | 1279.544571       | 640.275924       | <b>E</b> | <b>1063.614622</b> | 532.310949        | 1046.588073    | 523.797674        | <b>1045.604057</b> | 523.305666         | 9  |
| 10 | 1394.607900        | 697.807588        | 1377.581351    | 689.294314       | 1376.597335       | 688.802306       | <b>P</b> | <b>934.572029</b>  | 467.789652        | 917.545480     | 459.276378        | 916.561464         | 458.784370         | 8  |
| 11 | <b>1523.650493</b> | 762.328885        | 1506.623944    | 753.815610       | 1505.639928       | 753.323602       | <b>E</b> | 837.519265         | 419.263270        | 820.492716     | 410.749996        | <b>819.508700</b>  | 410.257988         | 7  |
| 12 | 1620.703257        | 810.855267        | 1603.676708    | 802.341992       | 1602.692692       | 801.849984       | <b>P</b> | <b>708.476672</b>  | 354.741974        | 691.450123     | 346.228699        |                    |                    | 6  |
| 13 | 1733.787321        | 867.397299        | 1716.760772    | 858.884024       | 1715.776756       | 858.392016       | <b>I</b> | <b>611.423908</b>  | 306.215592        | 594.397359     | 297.702317        |                    |                    | 5  |
| 14 | 1846.871385        | 923.939331        | 1829.844836    | 915.426056       | 1828.860820       | 914.934048       | <b>L</b> | <b>498.339844</b>  | 249.673560        | 481.313295     | 241.160285        |                    |                    | 4  |
| 15 | 1959.955449        | 980.481363        | 1942.928900    | 971.968088       | 1941.944884       | 971.476080       | <b>I</b> | <b>385.255780</b>  | 193.131528        | 368.229231     | 184.618253        |                    |                    | 3  |
| 16 | 2057.008213        | 1029.007744       | 2039.981664    | 1020.494470      | 2038.997648       | 1020.002462      | <b>P</b> | <b>272.171716</b>  | 136.589496        | 255.145167     | 128.076221        |                    |                    | 2  |
| 17 |                    |                   |                |                  |                   |                  | <b>R</b> | 175.118952         | 88.063114         | 158.092403     | 79.549839         |                    |                    | 1  |

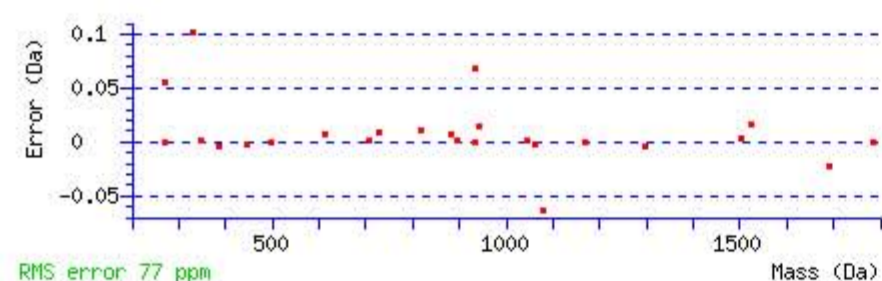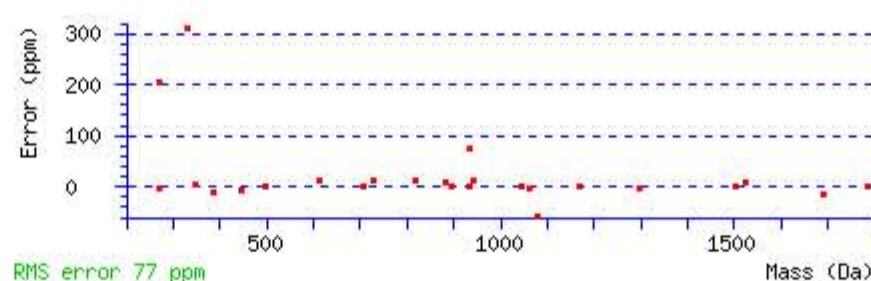

NCBI BLAST search of **GECVPGEQEPELIPR**

(Parameters: blastp, nr protein database, expect=20000, no filter, PAM30)

Other BLAST [web gateways](#)

All matches to this query

| Score | Mr(calc):   | Delta     | Sequence                             |
|-------|-------------|-----------|--------------------------------------|
| 38.2  | 2230.112595 | -0.004443 | <a href="#">GECVPGEQEPELIPR</a>      |
| 2.8   | 2230.090591 | 0.017561  | <a href="#">AELGERPEPVDFSFNPLADK</a> |
| 1.5   | 2230.122971 | -0.014819 | <a href="#">QFLGPEGNVDVELIDKSTNR</a> |

# MASCOT Search Results

## Peptide View

MS/MS Fragmentation of **KEDSCQLGYSAGPCMGMTSR**

Found in **AMBP\_HUMAN**, Protein AMBP OS=Homo sapiens GN=AMBP PE=1 SV=1

Match to Query 49018: 2545.089612 from(849.370480,3+) rtinseconds(1914) index(45347)  
 Title: Locus:1.1.1.3379.18 File:"2013-07-02 CLN FXIII 180 min 3rd F 4.wiff"  
 Data file C:\Program Files (x86)\Matrix Science\Mascot Daemon\mgf9 FXIII 180 min 3rd\mascot\_daemon\_merge.mgf

Click mouse within plot area to zoom in by factor of two about that point  
 Or, Plot from  to  Da   
 Label all possible matches  Label matches used for scoring

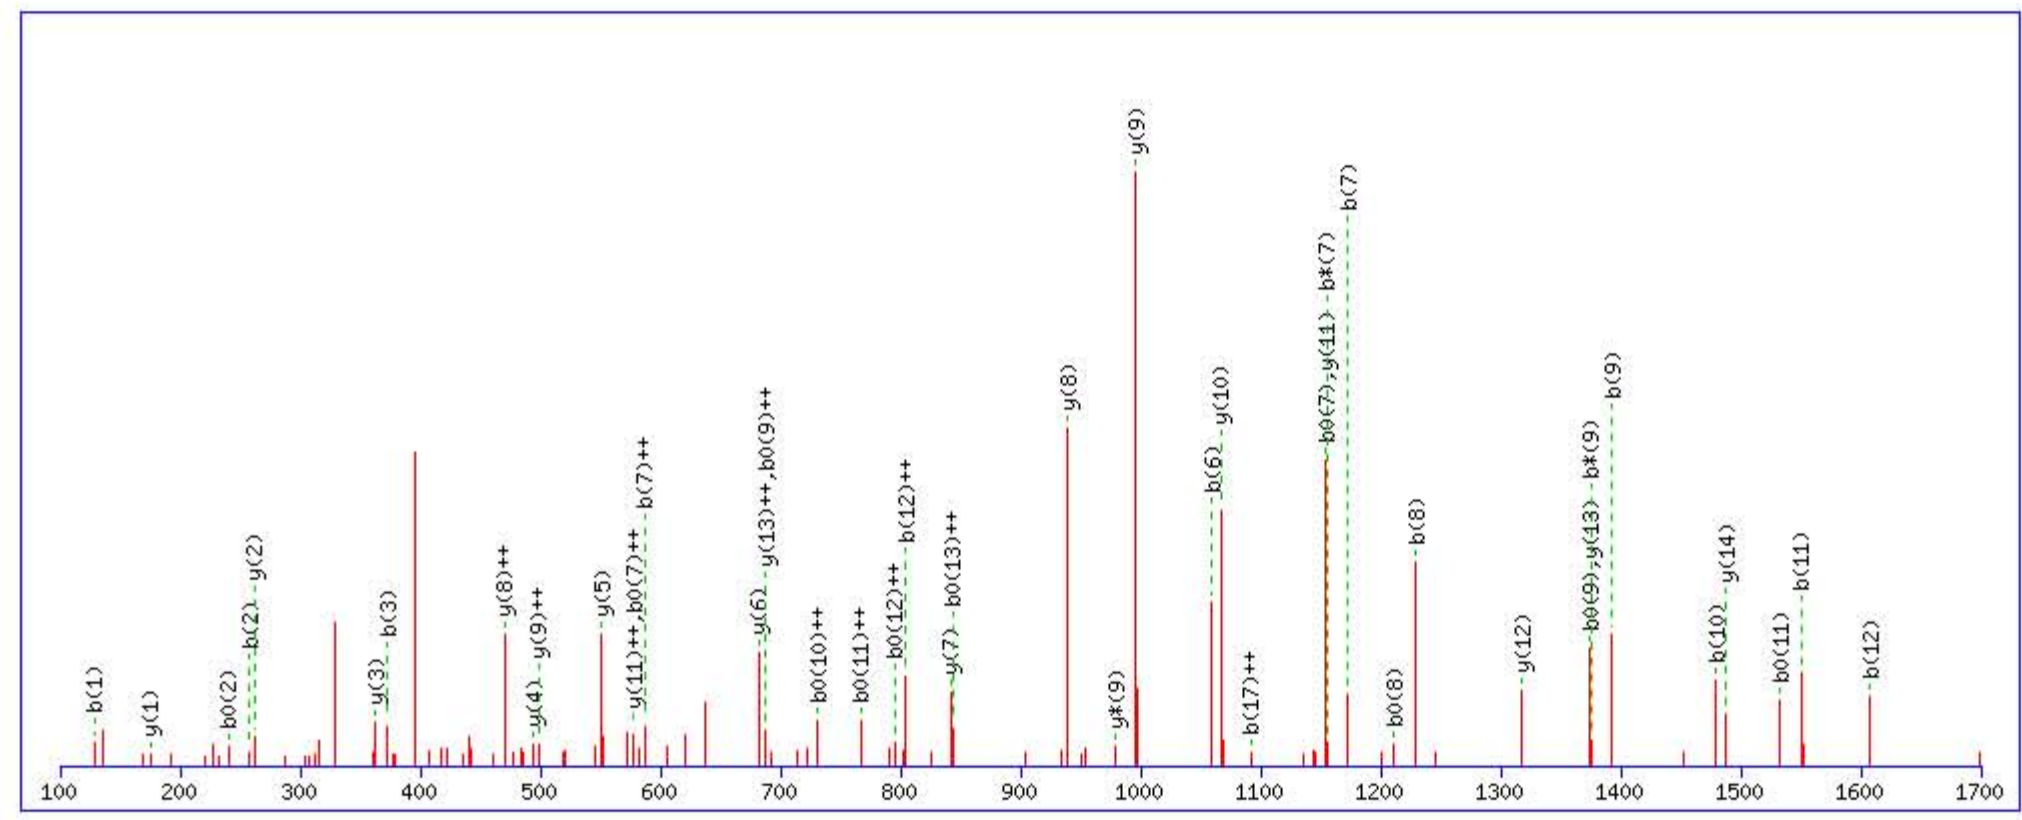

Monoisotopic mass of neutral peptide Mr(calc): 2545.089188  
 Fixed modifications: Carbamidomethyl (C) (apply to specified residues or termini only)  
 Variable modifications:  
 Q6 : Biotin:Thermo-21345 (Q)  
 Ions Score: 89 Expect: 3.8e-009  
 Matches : 45/224 fragment ions using 67 most intense peaks ([help](#))

| #  | b                  | b <sup>++</sup>    | b <sup>*</sup>     | b <sup>+++</sup> | b <sup>0</sup>     | b <sup>0++</sup>  | Seq.     | y                  | y <sup>++</sup>   | y <sup>*</sup>    | y <sup>+++</sup> | y <sup>0</sup> | y <sup>0++</sup> | #         |
|----|--------------------|--------------------|--------------------|------------------|--------------------|-------------------|----------|--------------------|-------------------|-------------------|------------------|----------------|------------------|-----------|
| 1  | <b>129.102239</b>  | 65.054757          | 112.075690         | 56.541483        |                    |                   | <b>K</b> |                    |                   |                   |                  |                |                  | <b>20</b> |
| 2  | <b>258.144832</b>  | 129.576054         | 241.118283         | 121.062780       | <b>240.134267</b>  | 120.570772        | <b>E</b> | 2418.001508        | 1209.504392       | 2400.974959       | 1200.991117      | 2399.990943    | 1200.499109      | <b>19</b> |
| 3  | <b>373.171775</b>  | 187.089526         | 356.145226         | 178.576251       | 355.161210         | 178.084243        | <b>D</b> | 2288.958915        | 1144.983095       | 2271.932366       | 1136.469821      | 2270.948350    | 1135.977813      | <b>18</b> |
| 4  | 460.203803         | 230.605540         | 443.177254         | 222.092265       | 442.193238         | 221.600257        | <b>S</b> | 2173.931972        | 1087.469624       | 2156.905423       | 1078.956349      | 2155.921407    | 1078.464341      | <b>17</b> |
| 5  | 620.234452         | 310.620864         | 603.207903         | 302.107590       | 602.223887         | 301.615582        | <b>C</b> | 2086.899944        | 1043.953610       | 2069.873395       | 1035.440335      | 2068.889379    | 1034.948327      | <b>16</b> |
| 6  | <b>1059.459778</b> | 530.233527         | 1042.433229        | 521.720253       | 1041.449213        | 521.228245        | <b>Q</b> | 1926.869295        | 963.938286        | 1909.842746       | 955.425011       | 1908.858730    | 954.933003       | <b>15</b> |
| 7  | <b>1172.543842</b> | <b>586.775559</b>  | <b>1155.517293</b> | 578.262285       | <b>1154.533277</b> | <b>577.770277</b> | <b>L</b> | <b>1487.643969</b> | 744.325623        | 1470.617420       | 735.812348       | 1469.633404    | 735.320340       | <b>14</b> |
| 8  | <b>1229.565306</b> | 615.286291         | 1212.538757        | 606.773017       | <b>1211.554741</b> | 606.281008        | <b>G</b> | <b>1374.559905</b> | <b>687.783591</b> | 1357.533356       | 679.270316       | 1356.549340    | 678.778308       | <b>13</b> |
| 9  | <b>1392.628635</b> | 696.817956         | <b>1375.602086</b> | 688.304681       | <b>1374.618070</b> | <b>687.812673</b> | <b>Y</b> | <b>1317.538441</b> | 659.272859        | 1300.511892       | 650.759584       | 1299.527876    | 650.267576       | <b>12</b> |
| 10 | <b>1479.660663</b> | 740.333970         | 1462.634114        | 731.820695       | 1461.650098        | <b>731.328687</b> | <b>S</b> | <b>1154.475112</b> | <b>577.741194</b> | 1137.448563       | 569.227920       | 1136.464547    | 568.735912       | <b>11</b> |
| 11 | <b>1550.697777</b> | 775.852527         | 1533.671228        | 767.339252       | <b>1532.687212</b> | <b>766.847244</b> | <b>A</b> | <b>1067.443084</b> | 534.225180        | 1050.416535       | 525.711906       | 1049.432519    | 525.219898       | <b>10</b> |
| 12 | <b>1607.719241</b> | <b>804.363259</b>  | 1590.692692        | 795.849984       | 1589.708676        | <b>795.357976</b> | <b>G</b> | <b>996.405970</b>  | <b>498.706623</b> | <b>979.379421</b> | 490.193349       | 978.395405     | 489.701341       | <b>9</b>  |
| 13 | 1704.772005        | 852.889641         | 1687.745456        | 844.376366       | 1686.761440        | <b>843.884358</b> | <b>P</b> | <b>939.384506</b>  | <b>470.195891</b> | 922.357957        | 461.682617       | 921.373941     | 461.190609       | <b>8</b>  |
| 14 | 1864.802654        | 932.904965         | 1847.776105        | 924.391691       | 1846.792089        | 923.899683        | <b>C</b> | <b>842.331742</b>  | 421.669509        | 825.305193        | 413.156235       | 824.321177     | 412.664227       | <b>7</b>  |
| 15 | 1995.843139        | 998.425208         | 1978.816590        | 989.911933       | 1977.832574        | 989.419925        | <b>M</b> | <b>682.301093</b>  | 341.654185        | 665.274544        | 333.140910       | 664.290528     | 332.648902       | <b>6</b>  |
| 16 | 2052.864603        | 1026.935939        | 2035.838054        | 1018.422665      | 2034.854038        | 1017.930657       | <b>G</b> | <b>551.260608</b>  | 276.133942        | 534.234059        | 267.620668       | 533.250043     | 267.128660       | <b>5</b>  |
| 17 | 2183.905088        | <b>1092.456182</b> | 2166.878539        | 1083.942907      | 2165.894523        | 1083.450899       | <b>M</b> | <b>494.239144</b>  | 247.623210        | 477.212595        | 239.109935       | 476.228579     | 238.617927       | <b>4</b>  |
| 18 | 2284.952767        | 1142.980021        | 2267.926218        | 1134.466747      | 2266.942202        | 1133.974739       | <b>T</b> | <b>363.198659</b>  | 182.102967        | 346.172110        | 173.589693       | 345.188094     | 173.097685       | <b>3</b>  |
| 19 | 2371.984795        | 1186.496035        | 2354.958246        | 1177.982761      | 2353.974230        | 1177.490753       | <b>S</b> | <b>262.150980</b>  | 131.579128        | 245.124431        | 123.065854       | 244.140415     | 122.573846       | <b>2</b>  |
| 20 |                    |                    |                    |                  |                    |                   | <b>R</b> | <b>175.118952</b>  | 88.063114         | 158.092403        | 79.549839        |                |                  | <b>1</b>  |

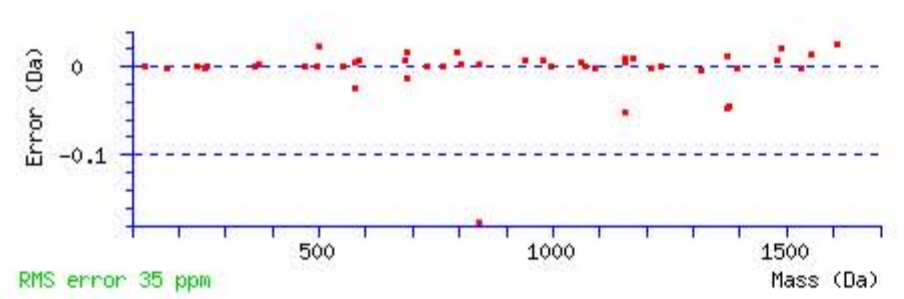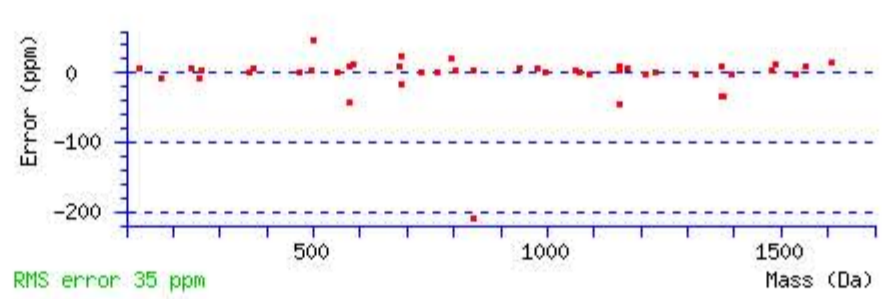

NCBI BLAST search of **KEDSCQLGYSAGPCMGMTSR**  
 (Parameters: blastp, nr protein database, expect=20000, no filter, PAM30)  
 Other BLAST [web gateways](#)

### All matches to this query

| Score | Mr(calc):   | Delta     | Sequence                             |
|-------|-------------|-----------|--------------------------------------|
| 89.4  | 2545.089188 | 0.000424  | <a href="#">KEDSCQLGYSAGPCMGMTSR</a> |
| 1.2   | 2545.110138 | -0.020526 | <a href="#">QDGSCEASVSFEDVTVDFSR</a> |

# MASCOT SEARCH RESULTS

## Peptide View

MS/MS Fragmentation of **VGALSQLR**

Found in **MENT\_HUMAN**, Protein MENT OS=Homo sapiens GN=MENT PE=2 SV=1

Match to Query 16375: 1153.660008 from(577.837280,2+) rtinseconds(1963) index(31583)

Title: Locus:1.1.1.3347.13 File:"2013-07-02 CLN FXIII 180 min 3rd F 3.wiff"

Data file C:\Program Files (x86)\Matrix Science\Mascot Daemon\mgf9 FXIII 180 min 3rd\mascot\_daemon\_merge.mgf

Click mouse within plot area to zoom in by factor of two about that point

Or, Plot from  to  Da

Label all possible matches  Label matches used for scoring

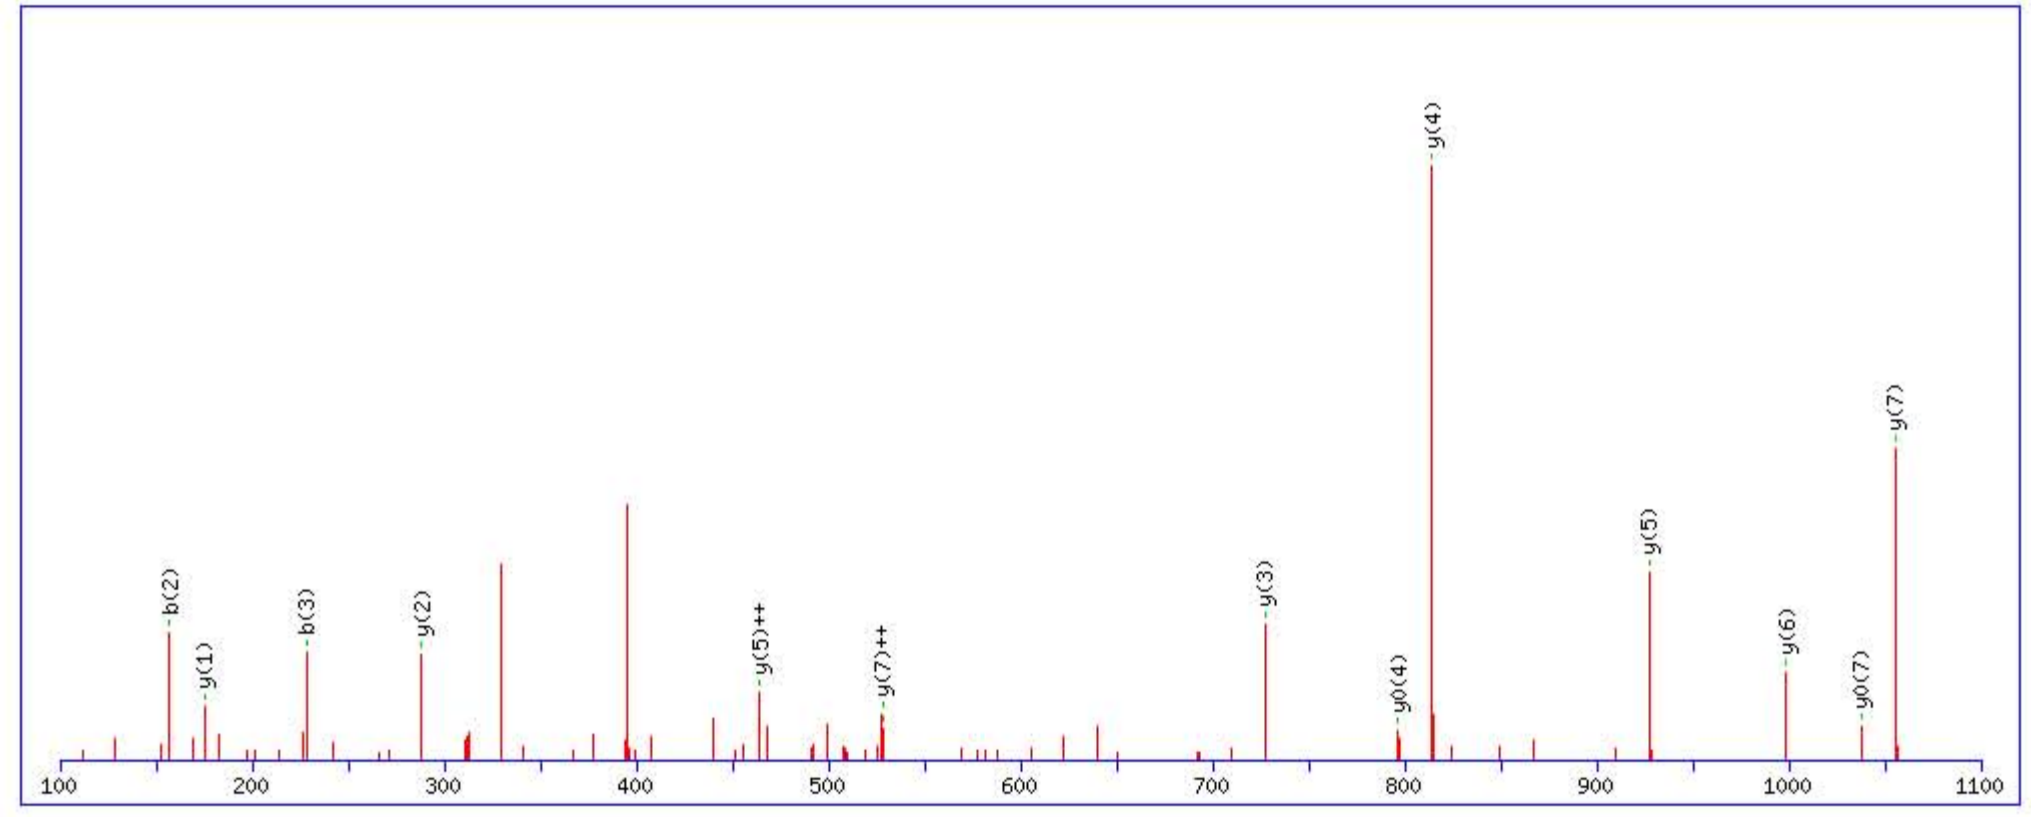

Monoisotopic mass of neutral peptide Mr(calc): 1153.664139

Fixed modifications: Carbamidomethyl (C) (apply to specified residues or termini only)

Variable modifications:

Q6 : Biotin:Thermo-21345 (Q)

Ions Score: 53 Expect: 7.6e-005

Matches : 13/60 fragment ions using 20 most intense peaks [\(help\)](#)

| # | b          | b <sup>++</sup> | b <sup>*</sup> | b <sup>*++</sup> | b <sup>0</sup> | b <sup>0++</sup> | Seq. | y           | y <sup>++</sup> | y <sup>*</sup> | y <sup>*++</sup> | y <sup>0</sup> | y <sup>0++</sup> | # |
|---|------------|-----------------|----------------|------------------|----------------|------------------|------|-------------|-----------------|----------------|------------------|----------------|------------------|---|
| 1 | 100.075690 | 50.541483       |                |                  |                |                  | V    |             |                 |                |                  |                |                  | 8 |
| 2 | 157.097154 | 79.052215       |                |                  |                |                  | G    | 1055.603012 | 528.305144      | 1038.576463    | 519.791870       | 1037.592447    | 519.299862       | 7 |
| 3 | 228.134268 | 114.570772      |                |                  |                |                  | A    | 998.581548  | 499.794412      | 981.554999     | 491.281138       | 980.570983     | 490.789130       | 6 |
| 4 | 341.218332 | 171.112804      |                |                  |                |                  | L    | 927.544434  | 464.275855      | 910.517885     | 455.762581       | 909.533869     | 455.270573       | 5 |
| 5 | 428.250360 | 214.628818      |                |                  | 410.239795     | 205.623535       | S    | 814.460370  | 407.733823      | 797.433821     | 399.220549       | 796.449805     | 398.728541       | 4 |
| 6 | 867.475686 | 434.241481      | 850.449137     | 425.728207       | 849.465121     | 425.236199       | Q    | 727.428342  | 364.217809      | 710.401793     | 355.704535       |                |                  | 3 |
| 7 | 980.559750 | 490.783513      | 963.533201     | 482.270239       | 962.549185     | 481.778231       | L    | 288.203016  | 144.605146      | 271.176467     | 136.091872       |                |                  | 2 |
| 8 |            |                 |                |                  |                |                  | R    | 175.118952  | 88.063114       | 158.092403     | 79.549840        |                |                  | 1 |

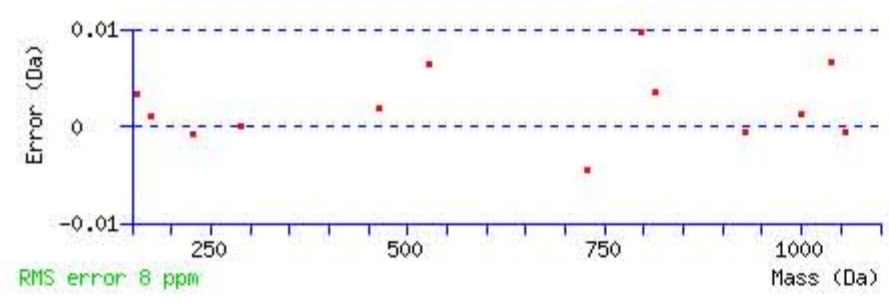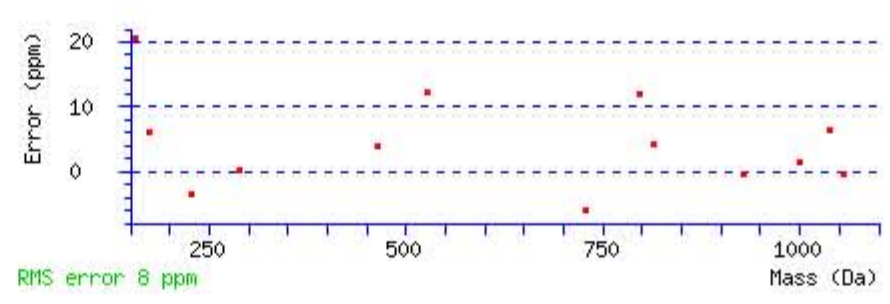

NCBI BLAST search of **VGALSQLR**

(Parameters: blastp, nr protein database, expect=20000, no filter, PAM30)

Other BLAST [web gateways](#)

### All matches to this query

| Score | Mr(calc):   | Delta     | Sequence                    |
|-------|-------------|-----------|-----------------------------|
| 53.3  | 1153.664139 | -0.004131 | <a href="#">VGALSQLR</a>    |
| 14.4  | 1153.664124 | -0.004116 | <a href="#">VKQEALR</a>     |
| 13.1  | 1153.675354 | -0.015346 | <a href="#">RALLSQR</a>     |
| 13.1  | 1153.675369 | -0.015361 | <a href="#">RALTVQR</a>     |
| 11.0  | 1153.645477 | 0.014531  | <a href="#">RALAAPVAEEK</a> |
| 9.2   | 1153.667953 | -0.007945 | <a href="#">RANPNSIRVK</a>  |
| 6.2   | 1153.656723 | 0.003285  | <a href="#">RPSADPGKKAK</a> |
| 3.5   | 1153.642822 | 0.017186  | <a href="#">RAPIGQSGRGR</a> |
| 2.5   | 1153.675369 | -0.015361 | <a href="#">QTVRALR</a>     |
| 1.9   | 1153.645493 | 0.014515  | <a href="#">NLLKLDAPDR</a>  |

# MASCOT SEARCH RESULTS

## Peptide View

MS/MS Fragmentation of **ETAASLLQAGYK**

Found in **THRB\_HUMAN**, Prothrombin OS=Homo sapiens GN=F2 PE=1 SV=2

Match to Query 28801: 1561.812528 from(781.913540,2+) rtinseconds(2139) index(46847)

Title: Locus:1.1.1.3457.18 File:"2013-07-02 CLN FXIII 180 min 3rd F 4.wiff"

Data file C:\Program Files (x86)\Matrix Science\Mascot Daemon\mgf\9 FXIII 180 min 3rd\mascot\_daemon\_merge.mgf

Click mouse within plot area to zoom in by factor of two about that point

Or, Plot from  to  Da

Label all possible matches  Label matches used for scoring

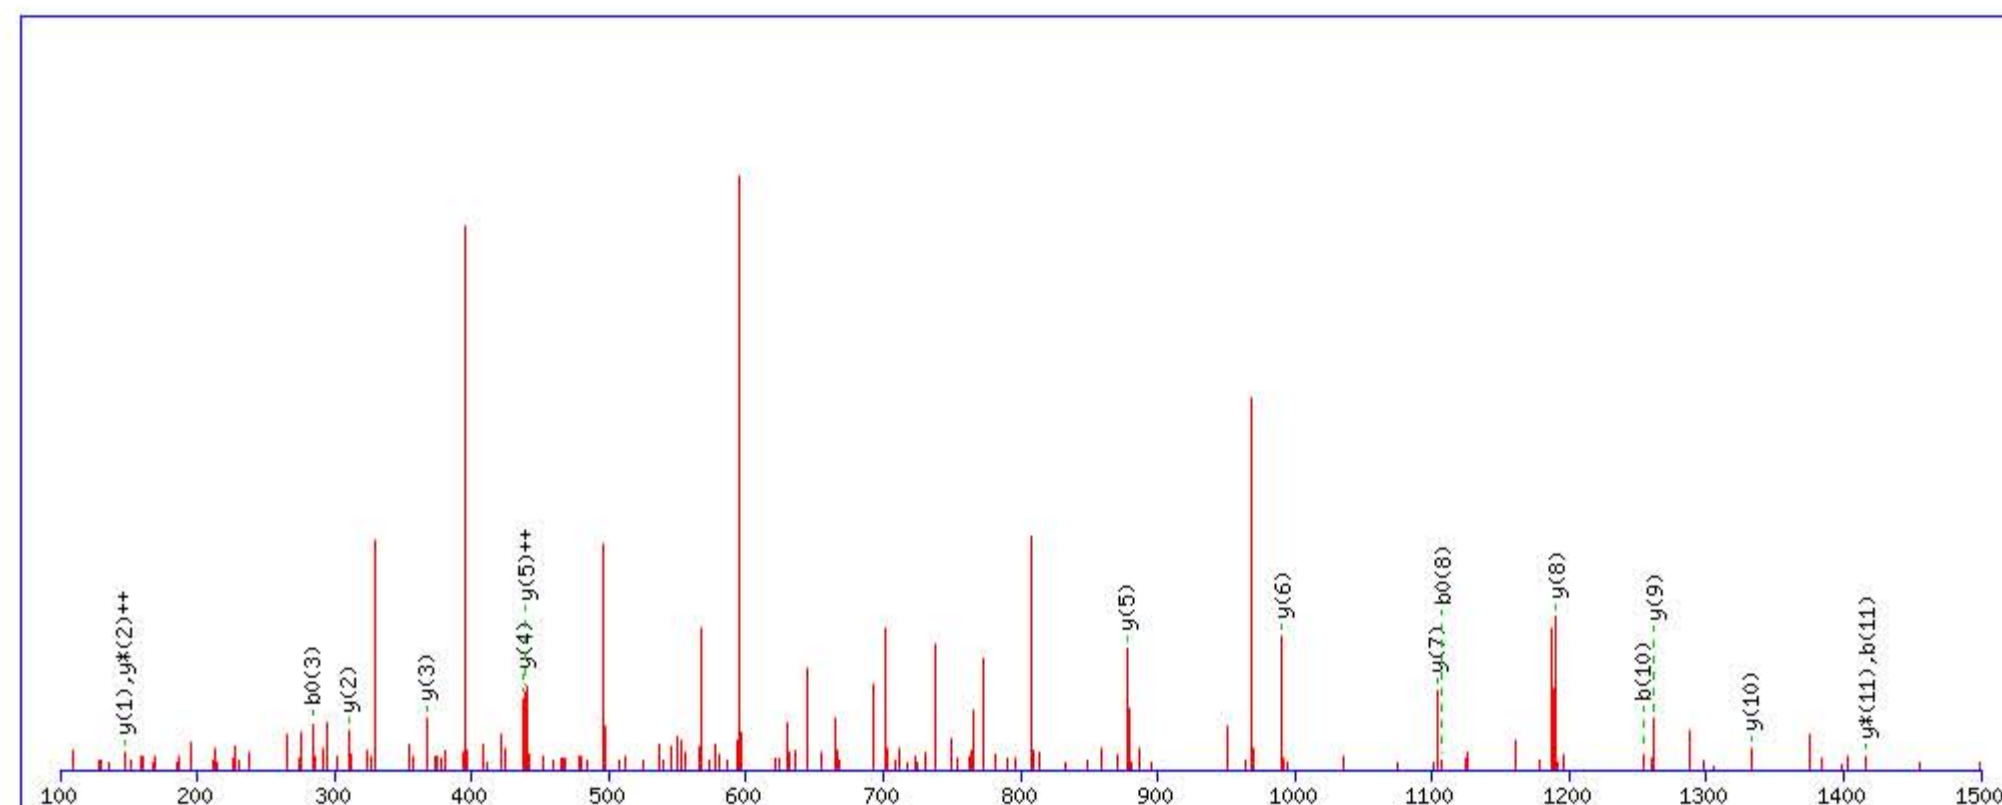

Monoisotopic mass of neutral peptide Mr(calc): 1561.817383

Fixed modifications: Carbamidomethyl (C) (apply to specified residues or termini only)

Variable modifications:

Q8 : Biotin:Thermo-21345 (Q)

Ions Score: 33 Expect: 0.0016

Matches : 17/104 fragment ions using 55 most intense peaks [\(help\)](#)

| #  | b           | b <sup>++</sup> | b <sup>*</sup> | b <sup>*++</sup> | b <sup>0</sup> | b <sup>0++</sup> | Seq. | y           | y <sup>++</sup> | y <sup>*</sup> | y <sup>*++</sup> | y <sup>0</sup> | y <sup>0++</sup> | #  |
|----|-------------|-----------------|----------------|------------------|----------------|------------------|------|-------------|-----------------|----------------|------------------|----------------|------------------|----|
| 1  | 130.049869  | 65.528572       |                |                  | 112.039304     | 56.523290        | E    |             |                 |                |                  |                |                  | 12 |
| 2  | 231.097548  | 116.052412      |                |                  | 213.086983     | 107.047130       | T    | 1433.782100 | 717.394688      | 1416.755551    | 708.881414       | 1415.771535    | 708.389406       | 11 |
| 3  | 302.134662  | 151.570969      |                |                  | 284.124097     | 142.565687       | A    | 1332.734421 | 666.870848      | 1315.707872    | 658.357574       | 1314.723856    | 657.865566       | 10 |
| 4  | 373.171776  | 187.089526      |                |                  | 355.161211     | 178.084243       | A    | 1261.697307 | 631.352292      | 1244.670758    | 622.839017       | 1243.686742    | 622.347009       | 9  |
| 5  | 460.203804  | 230.605540      |                |                  | 442.193239     | 221.600257       | S    | 1190.660193 | 595.833734      | 1173.633644    | 587.320460       | 1172.649628    | 586.828452       | 8  |
| 6  | 573.287868  | 287.147572      |                |                  | 555.277303     | 278.142290       | L    | 1103.628165 | 552.317721      | 1086.601616    | 543.804446       |                |                  | 7  |
| 7  | 686.371932  | 343.689604      |                |                  | 668.361367     | 334.684322       | L    | 990.544101  | 495.775689      | 973.517552     | 487.262414       |                |                  | 6  |
| 8  | 1125.597258 | 563.302267      | 1108.570709    | 554.788993       | 1107.586693    | 554.296985       | Q    | 877.460037  | 439.233657      | 860.433488     | 430.720382       |                |                  | 5  |
| 9  | 1196.634372 | 598.820824      | 1179.607823    | 590.307550       | 1178.623807    | 589.815541       | A    | 438.234711  | 219.620993      | 421.208162     | 211.107719       |                |                  | 4  |
| 10 | 1253.655836 | 627.331556      | 1236.629287    | 618.818282       | 1235.645271    | 618.326273       | G    | 367.197597  | 184.102436      | 350.171048     | 175.589162       |                |                  | 3  |
| 11 | 1416.719165 | 708.863221      | 1399.692616    | 700.349946       | 1398.708600    | 699.857938       | Y    | 310.176133  | 155.591705      | 293.149584     | 147.078430       |                |                  | 2  |
| 12 |             |                 |                |                  |                |                  | K    | 147.112804  | 74.060040       | 130.086255     | 65.546765        |                |                  | 1  |

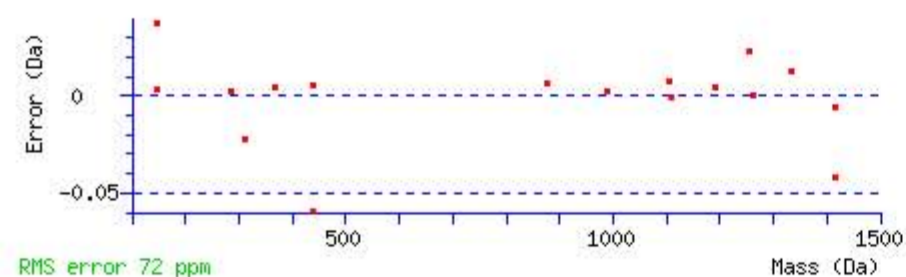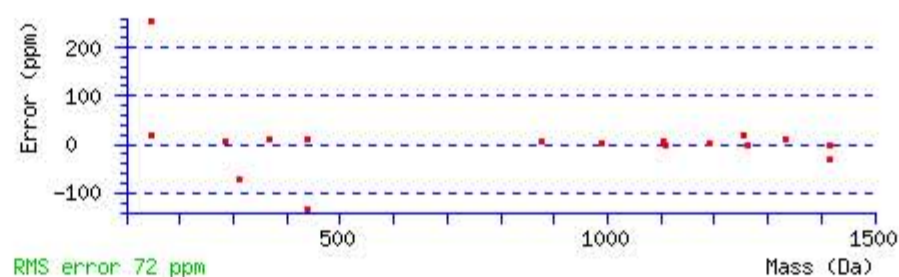

NCBI BLAST search of [ETAASLLQAGYK](#)

(Parameters: blastp, nr protein database, expect=20000, no filter, PAM30)

Other BLAST [web gateways](#)

All matches to this query

| Score | Mr(calc):   | Delta     | Sequence                       |
|-------|-------------|-----------|--------------------------------|
| 33.3  | 1561.817383 | -0.004855 | <a href="#">ETAASLLQAGYK</a>   |
| 3.3   | 1561.828613 | -0.016085 | <a href="#">QLASRYASVEK</a>    |
| 1.2   | 1561.821243 | -0.008715 | <a href="#">TEKHPPVSPGRTEK</a> |

Mascot: <http://www.matrixscience.com/>

# MASCOT SEARCH RESULTS

## Peptide View

MS/MS Fragmentation of **TATSEYQTFNPR**

Found in **THRB\_HUMAN**, Prothrombin OS=Homo sapiens GN=F2 PE=1 SV=2

Match to Query 37067: 1871.887692 from(624.969840,3+) rtinseconds(2291) index(47802)

Title: Locus:1.1.1.3510.7 File:"2013-07-02 CLN FXIII 180 min 3rd F 4.wiff"

Data file C:\Program Files (x86)\Matrix Science\Mascot Daemon\mgf\9 FXIII 180 min 3rd\mascot\_daemon\_merge.mgf

Click mouse within plot area to zoom in by factor of two about that point

Or, Plot from  to  Da

Label all possible matches  Label matches used for scoring

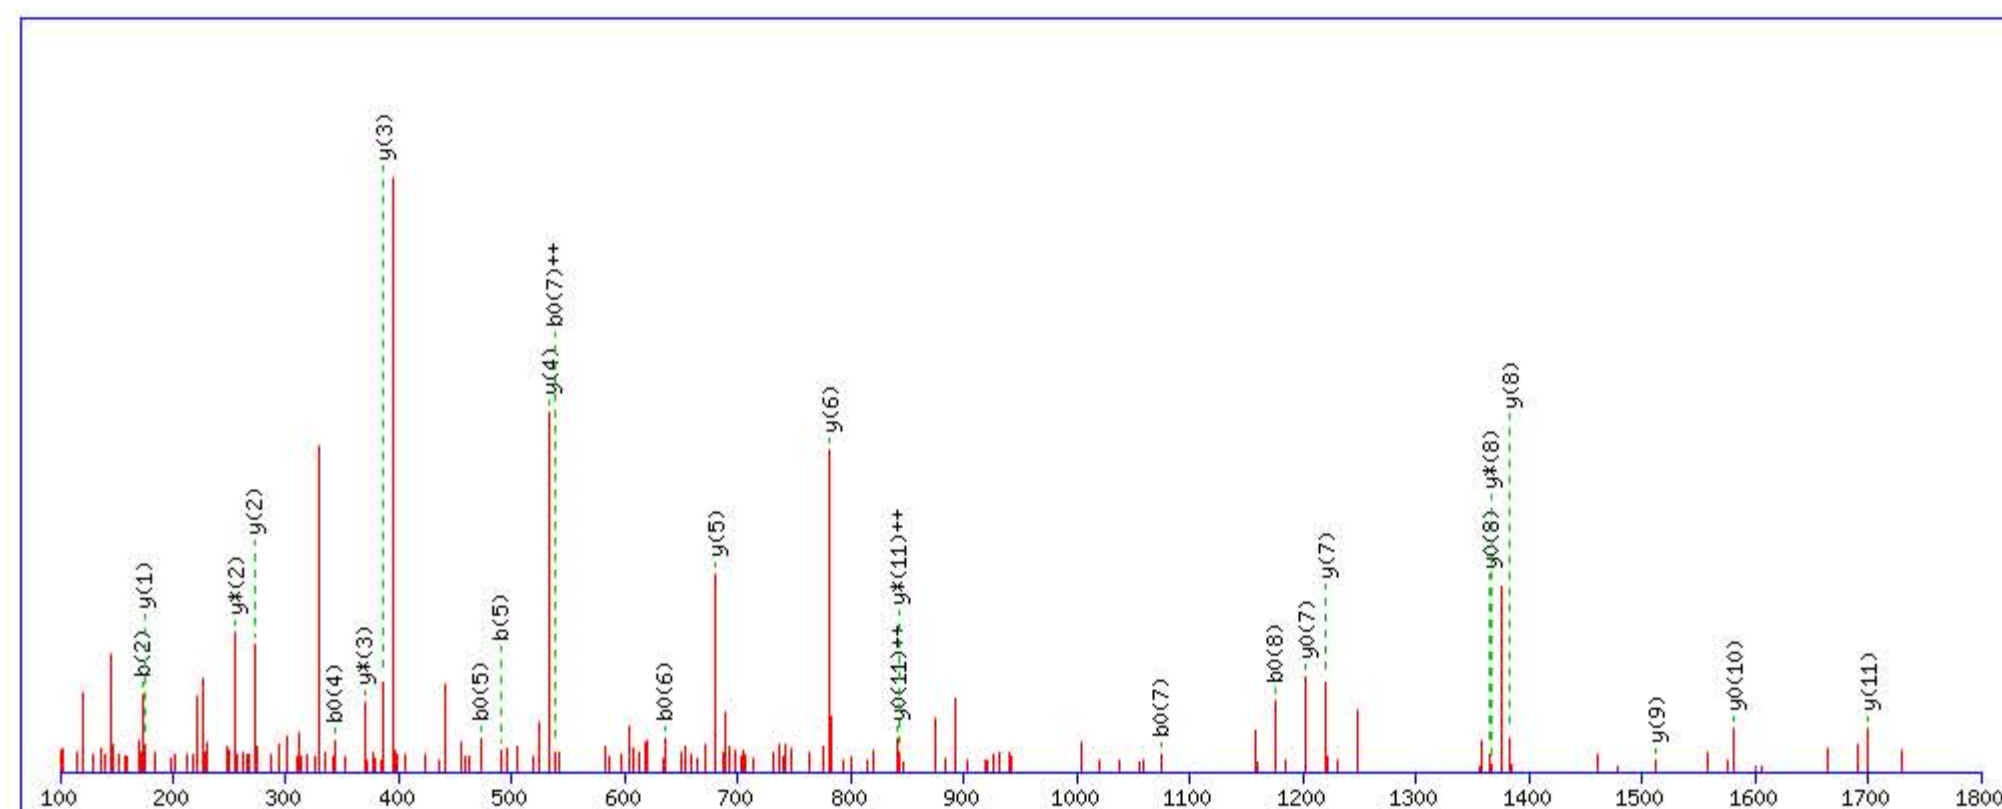

Monoisotopic mass of neutral peptide Mr(calc): 1871.887619

Fixed modifications: Carbamidomethyl (C) (apply to specified residues or termini only)

Variable modifications:

Q7 : Biotin:Thermo-21345 (Q)

Ions Score: 30 Expect: 0.016

Matches : 26/122 fragment ions using 87 most intense peaks [\(help\)](#)

| #  | b                 | b <sup>++</sup> | b <sup>*</sup> | b <sup>+++</sup> | b <sup>0</sup>     | b <sup>0++</sup>  | Seq. | y                  | y <sup>++</sup> | y <sup>*</sup>     | y <sup>+++</sup>  | y <sup>0</sup>     | y <sup>0++</sup>  | #  |
|----|-------------------|-----------------|----------------|------------------|--------------------|-------------------|------|--------------------|-----------------|--------------------|-------------------|--------------------|-------------------|----|
| 1  | 102.054955        | 51.531116       |                |                  | 84.044390          | 42.525833         | T    |                    |                 |                    |                   |                    |                   | 13 |
| 2  | <b>173.092069</b> | 87.049672       |                |                  | 155.081504         | 78.044390         | A    | 1771.847219        | 886.427248      | 1754.820670        | 877.913973        | 1753.836654        | 877.421965        | 12 |
| 3  | 274.139748        | 137.573512      |                |                  | 256.129183         | 128.568230        | T    | <b>1700.810105</b> | 850.908691      | 1683.783556        | <b>842.395416</b> | 1682.799540        | <b>841.903408</b> | 11 |
| 4  | 361.171776        | 181.089526      |                |                  | <b>343.161211</b>  | 172.084243        | S    | 1599.762426        | 800.384851      | 1582.735877        | 791.871577        | <b>1581.751861</b> | 791.379569        | 10 |
| 5  | <b>490.214369</b> | 245.610822      |                |                  | <b>472.203804</b>  | 236.605540        | E    | <b>1512.730398</b> | 756.868837      | 1495.703849        | 748.355563        | 1494.719833        | 747.863555        | 9  |
| 6  | 653.277698        | 327.142487      |                |                  | <b>635.267133</b>  | 318.137205        | Y    | <b>1383.687805</b> | 692.347541      | <b>1366.661256</b> | 683.834266        | <b>1365.677240</b> | 683.342258        | 8  |
| 7  | 1092.503024       | 546.755150      | 1075.476475    | 538.241876       | <b>1074.492459</b> | <b>537.749868</b> | Q    | <b>1220.624476</b> | 610.815876      | 1203.597927        | 602.302602        | <b>1202.613911</b> | 601.810594        | 7  |
| 8  | 1193.550703       | 597.278990      | 1176.524154    | 588.765715       | <b>1175.540138</b> | 588.273707        | T    | <b>781.399150</b>  | 391.203213      | 764.372601         | 382.689939        | 763.388585         | 382.197931        | 6  |
| 9  | 1340.619117       | 670.813197      | 1323.592568    | 662.299922       | 1322.608552        | 661.807914        | F    | <b>680.351471</b>  | 340.679374      | 663.324922         | 332.166099        |                    |                   | 5  |
| 10 | 1487.687531       | 744.347404      | 1470.660982    | 735.834129       | 1469.676966        | 735.342121        | F    | <b>533.283057</b>  | 267.145167      | 516.256508         | 258.631892        |                    |                   | 4  |
| 11 | 1601.730458       | 801.368867      | 1584.703909    | 792.855593       | 1583.719893        | 792.363585        | N    | <b>386.214643</b>  | 193.610959      | <b>369.188094</b>  | 185.097685        |                    |                   | 3  |
| 12 | 1698.783222       | 849.895249      | 1681.756673    | 841.381975       | 1680.772657        | 840.889967        | P    | <b>272.171716</b>  | 136.589496      | <b>255.145167</b>  | 128.076221        |                    |                   | 2  |
| 13 |                   |                 |                |                  |                    |                   | R    | <b>175.118952</b>  | 88.063114       | 158.092403         | 79.549839         |                    |                   | 1  |

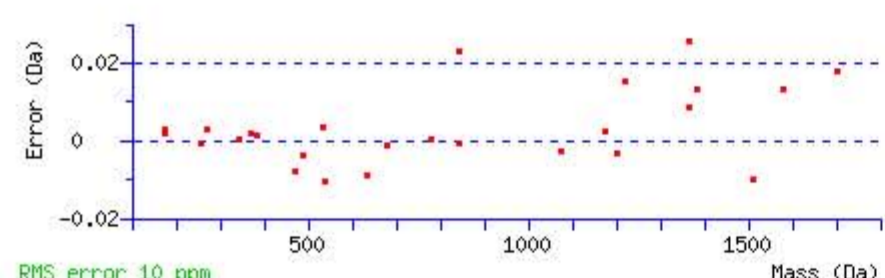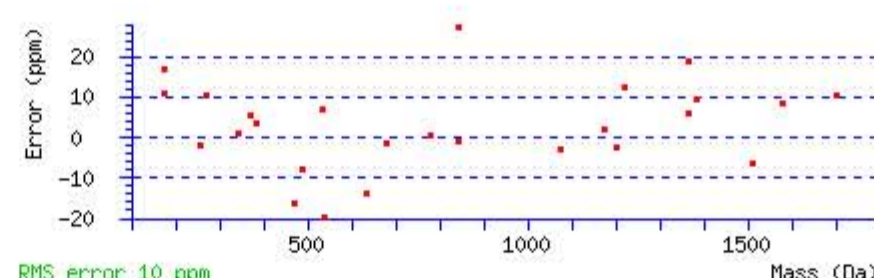

NCBI BLAST search of [TATSEYQTFNPR](#)

(Parameters: blastp, nr protein database, expect=20000, no filter, PAM30)

Other BLAST [web gateways](#)

All matches to this query

| Score | Mr(calc):   | Delta    | Sequence                     |
|-------|-------------|----------|------------------------------|
| 30.2  | 1871.887619 | 0.000073 | <a href="#">TATSEYQTFNPR</a> |

Mascot: <http://www.matrixscience.com/>



# MASCOT Search Results

## Peptide View

MS/MS Fragmentation of **KSPQELLCGASLISDR**

Found in **THRB\_HUMAN**, Prothrombin OS=Homo sapiens GN=F2 PE=1 SV=2

Match to Query 41354: 2084.075982 from(695.699270,3+) rtinseconds(2291) index(47804)

Title: Locus:1.1.1.3510.9 File:"2013-07-02 CLN FXIII 180 min 3rd F 4.wiff"

Data file C:\Program Files (x86)\Matrix Science\Mascot Daemon\mgf\9 FXIII 180 min 3rd\mascot\_daemon\_merge.mgf

Click mouse within plot area to zoom in by factor of two about that point

Or, Plot from  to  Da

Label all possible matches  Label matches used for scoring

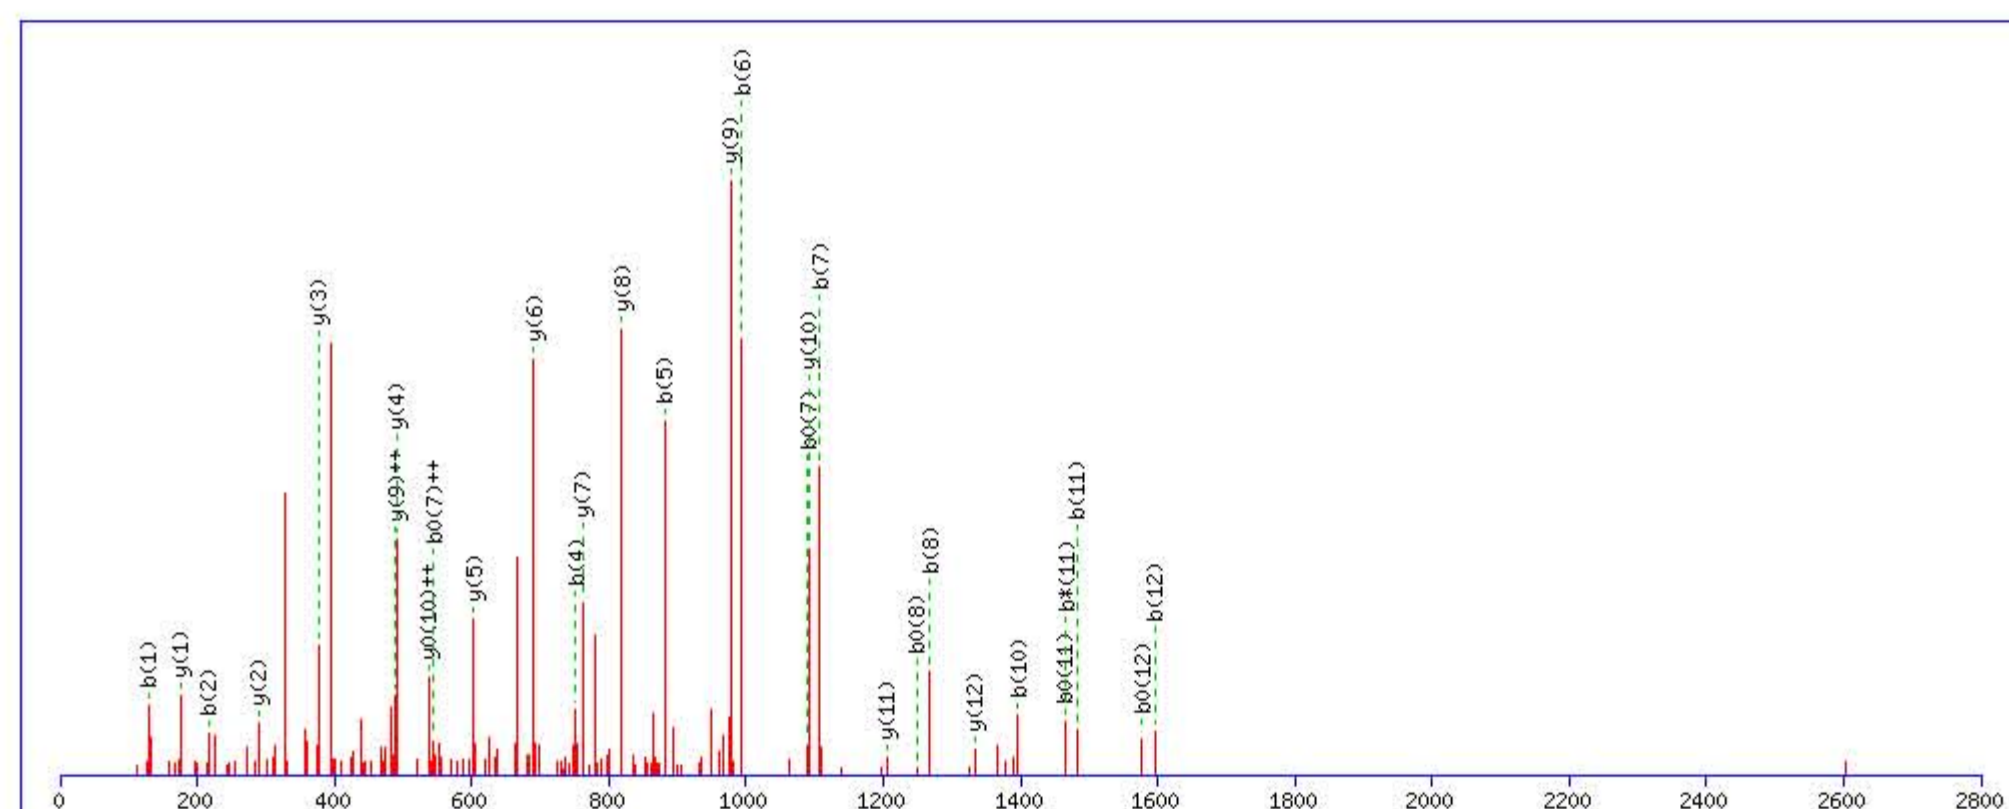

Monoisotopic mass of neutral peptide Mr(calc): 2084.075806

Fixed modifications: Carbamidomethyl (C) (apply to specified residues or termini only)

Variable modifications:

Q4 : Biotin:Thermo-21345 (Q)

Ions Score: 90 Expect: 2.6e-008

Matches : 30/176 fragment ions using 43 most intense peaks [\(help\)](#)

| #  | b                  | b <sup>++</sup> | b <sup>+</sup>     | b <sup>++</sup> | b <sup>0</sup>     | b <sup>0++</sup>  | Seq.     | y                  | y <sup>++</sup>   | y <sup>+</sup> | y <sup>++</sup> | y <sup>0</sup> | y <sup>0++</sup>  | #         |
|----|--------------------|-----------------|--------------------|-----------------|--------------------|-------------------|----------|--------------------|-------------------|----------------|-----------------|----------------|-------------------|-----------|
| 1  | <b>129.102239</b>  | 65.054757       | 112.075690         | 56.541483       |                    |                   | <b>K</b> |                    |                   |                |                 |                |                   | <b>16</b> |
| 2  | <b>216.134267</b>  | 108.570771      | 199.107718         | 100.057497      | 198.123702         | 99.565489         | <b>S</b> | 1956.988145        | 978.997711        | 1939.961596    | 970.484436      | 1938.977580    | 969.992428        | <b>15</b> |
| 3  | 313.187031         | 157.097153      | 296.160482         | 148.583879      | 295.176466         | 148.091871        | <b>P</b> | 1869.956117        | 935.481697        | 1852.929568    | 926.968422      | 1851.945552    | 926.476414        | <b>14</b> |
| 4  | <b>752.412357</b>  | 376.709817      | 735.385808         | 368.196542      | 734.401792         | 367.704534        | <b>Q</b> | 1772.903353        | 886.955314        | 1755.876804    | 878.442040      | 1754.892788    | 877.950032        | <b>13</b> |
| 5  | <b>881.454950</b>  | 441.231113      | 864.428401         | 432.717839      | 863.444385         | 432.225831        | <b>E</b> | <b>1333.678027</b> | 667.342652        | 1316.651478    | 658.829377      | 1315.667462    | 658.337369        | <b>12</b> |
| 6  | <b>994.539014</b>  | 497.773145      | 977.512465         | 489.259871      | 976.528449         | 488.767863        | <b>L</b> | <b>1204.635434</b> | 602.821355        | 1187.608885    | 594.308081      | 1186.624869    | 593.816073        | <b>11</b> |
| 7  | <b>1107.623078</b> | 554.315177      | 1090.596529        | 545.801903      | <b>1089.612513</b> | <b>545.309895</b> | <b>L</b> | <b>1091.551370</b> | 546.279323        | 1074.524821    | 537.766049      | 1073.540805    | <b>537.274040</b> | <b>10</b> |
| 8  | <b>1267.653727</b> | 634.330502      | 1250.627178        | 625.817227      | <b>1249.643162</b> | 625.325219        | <b>C</b> | <b>978.467306</b>  | <b>489.737291</b> | 961.440757     | 481.224017      | 960.456741     | 480.732009        | <b>9</b>  |
| 9  | 1324.675191        | 662.841234      | 1307.648642        | 654.327959      | 1306.664626        | 653.835951        | <b>G</b> | <b>818.436657</b>  | 409.721967        | 801.410108     | 401.208692      | 800.426092     | 400.716684        | <b>8</b>  |
| 10 | <b>1395.712305</b> | 698.359791      | 1378.685756        | 689.846516      | 1377.701740        | 689.354508        | <b>A</b> | <b>761.415193</b>  | 381.211235        | 744.388644     | 372.697960      | 743.404628     | 372.205952        | <b>7</b>  |
| 11 | <b>1482.744333</b> | 741.875805      | <b>1465.717784</b> | 733.362530      | <b>1464.733768</b> | 732.870522        | <b>S</b> | <b>690.378079</b>  | 345.692678        | 673.351530     | 337.179403      | 672.367514     | 336.687395        | <b>6</b>  |
| 12 | <b>1595.828397</b> | 798.417837      | 1578.801848        | 789.904562      | <b>1577.817832</b> | 789.412554        | <b>L</b> | <b>603.346051</b>  | 302.176664        | 586.319502     | 293.663389      | 585.335486     | 293.171381        | <b>5</b>  |
| 13 | 1708.912461        | 854.959868      | 1691.885912        | 846.446594      | 1690.901896        | 845.954586        | <b>I</b> | <b>490.261987</b>  | 245.634631        | 473.235438     | 237.121357      | 472.251422     | 236.629349        | <b>4</b>  |
| 14 | 1795.944489        | 898.475883      | 1778.917940        | 889.962608      | 1777.933924        | 889.470600        | <b>S</b> | <b>377.177923</b>  | 189.092600        | 360.151374     | 180.579325      | 359.167358     | 180.087317        | <b>3</b>  |
| 15 | 1910.971432        | 955.989354      | 1893.944883        | 947.476080      | 1892.960867        | 946.984072        | <b>D</b> | <b>290.145895</b>  | 145.576585        | 273.119346     | 137.063311      | 272.135330     | 136.571303        | <b>2</b>  |
| 16 |                    |                 |                    |                 |                    |                   | <b>R</b> | <b>175.118952</b>  | 88.063114         | 158.092403     | 79.549839       |                |                   | <b>1</b>  |

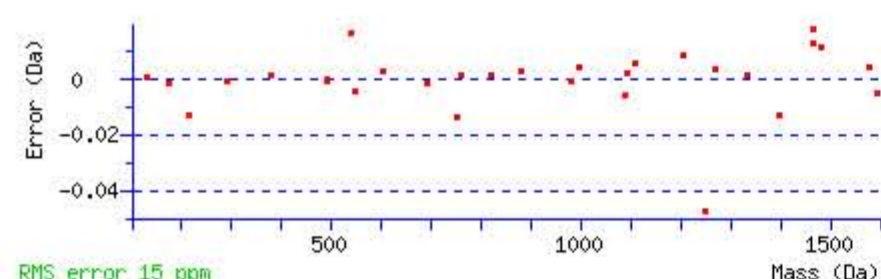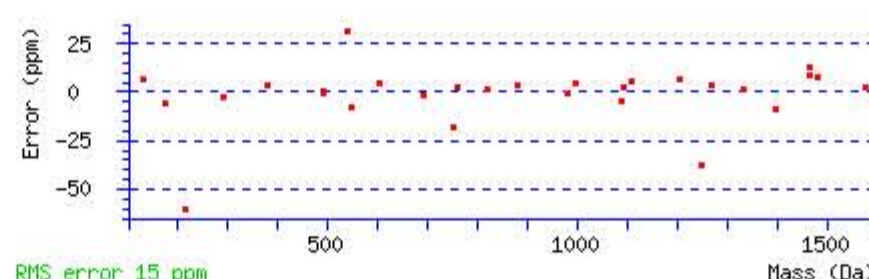

NCBI BLAST search of **KSPQELLCGASLISDR**

(Parameters: blastp, nr protein database, expect=20000, no filter, PAM30)

Other BLAST [web gateways](#)

## All matches to this query

| Score | Mr(calc):   | Delta     | Sequence                            |
|-------|-------------|-----------|-------------------------------------|
| 90.5  | 2084.075806 | 0.000176  | <a href="#">KSPQELLCGASLISDR</a>    |
| 10.7  | 2084.050659 | 0.025323  | <a href="#">EGSSEISQRVQSR</a>       |
| 10.6  | 2084.090225 | -0.014243 | <a href="#">SKYDVPGPPLNVTITDVNR</a> |
| 6.4   | 2084.097565 | -0.021583 | <a href="#">KEFIMAELIQTEKAYVR</a>   |
| 6.4   | 2084.097565 | -0.021583 | <a href="#">KEFIMAELLQTEKAYVR</a>   |
| 5.7   | 2084.045959 | 0.030023  | <a href="#">EDQLDTVLAVLEDSAR</a>    |
| 4.6   | 2084.101425 | -0.025443 | <a href="#">KAILRVAELSSDDFHLDR</a>  |
| 2.0   | 2084.083679 | -0.007697 | <a href="#">EDLISFLCGKVPPRNSR</a>   |
| 0.8   | 2084.071091 | 0.004891  | <a href="#">LAPSEITEELPSSQLMPVK</a> |

# MASCOT SEARCH RESULTS

## Peptide View

MS/MS Fragmentation of **HQDFNSAVQLVENFCR**  
 Found in **THRB\_HUMAN**, Prothrombin OS=Homo sapiens GN=F2 PE=1 SV=2

Match to Query 44597: 2274.088308 from(1138.051430,2+) rtinseconds(2469) index(62995)  
 Title: Locus:1.1.1.1771.12 File:"2013-07-02 CLN FXIII 180 min 3rd FT.wiff"  
 Data file C:\Program Files (x86)\Matrix Science\Mascot Daemon\mgf\9 FXIII 180 min 3rd\mascot\_daemon\_merge.mgf

Click mouse within plot area to zoom in by factor of two about that point  
 Or, Plot from  to  Da   
 Label all possible matches  Label matches used for scoring

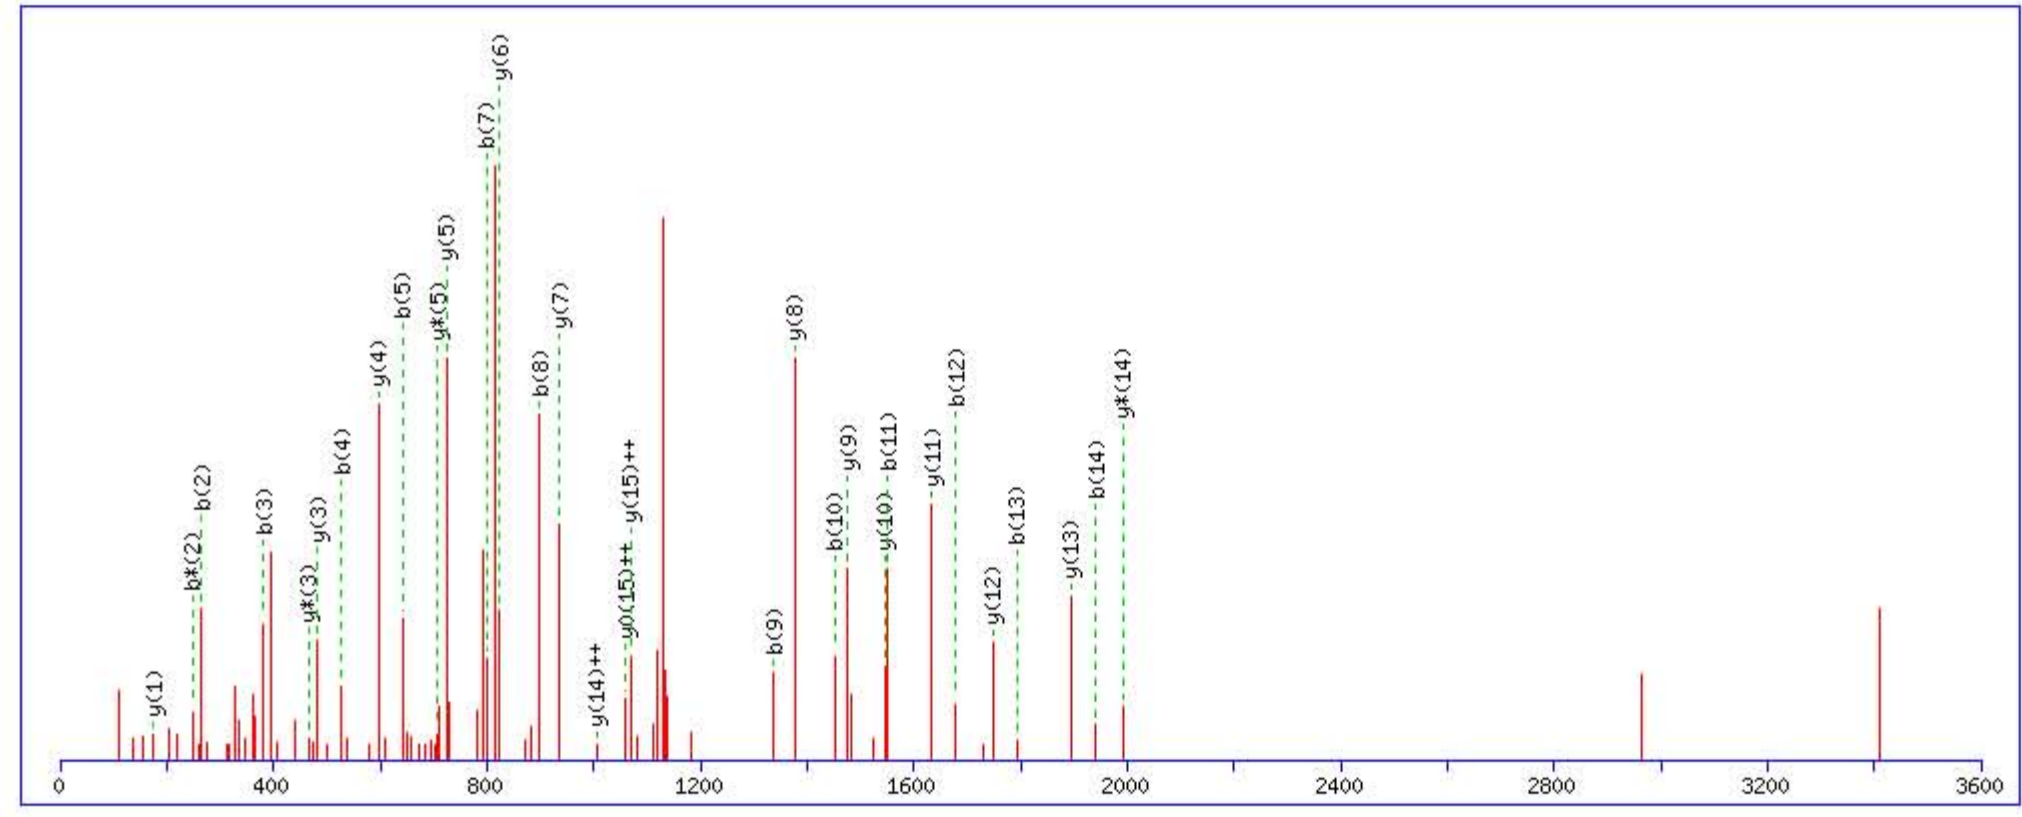

Monoisotopic mass of neutral peptide Mr(calc): 2274.067398  
 Fixed modifications: Carbamidomethyl (C) (apply to specified residues or termini only)  
 Variable modifications:  
 Q9 : Biotin:Thermo-21345 (Q)  
 Ions Score: 89 Expect: 2.8e-008  
 Matches : 31/166 fragment ions using 50 most intense peaks [\(help\)](#)

| #  | b                  | b <sup>++</sup> | b <sup>*</sup>    | b <sup>*++</sup> | b <sup>0</sup> | b <sup>0++</sup> | Seq. | y                  | y <sup>++</sup>    | y <sup>*</sup>     | y <sup>*++</sup> | y <sup>0</sup> | y <sup>0++</sup>   | #  |
|----|--------------------|-----------------|-------------------|------------------|----------------|------------------|------|--------------------|--------------------|--------------------|------------------|----------------|--------------------|----|
| 1  | 138.066188         | 69.536732       |                   |                  |                |                  | H    |                    |                    |                    |                  |                |                    | 16 |
| 2  | <b>266.124766</b>  | 133.566021      | <b>249.098217</b> | 125.052746       |                |                  | Q    | 2138.015757        | <b>1069.511516</b> | 2120.989208        | 1060.998242      | 2120.005192    | <b>1060.506234</b> | 15 |
| 3  | <b>381.151709</b>  | 191.079492      | 364.125160        | 182.566218       | 363.141144     | 182.074210       | D    | 2009.957179        | <b>1005.482228</b> | <b>1992.930630</b> | 996.968953       | 1991.946614    | 996.476945         | 14 |
| 4  | <b>528.220123</b>  | 264.613700      | 511.193574        | 256.100425       | 510.209558     | 255.608417       | F    | <b>1894.930236</b> | 947.968756         | 1877.903687        | 939.455482       | 1876.919671    | 938.963474         | 13 |
| 5  | <b>642.263050</b>  | 321.635163      | 625.236501        | 313.121889       | 624.252485     | 312.629881       | N    | <b>1747.861822</b> | 874.434549         | 1730.835273        | 865.921275       | 1729.851257    | 865.429267         | 12 |
| 6  | 729.295078         | 365.151177      | 712.268529        | 356.637903       | 711.284513     | 356.145895       | S    | <b>1633.818895</b> | 817.413086         | 1616.792346        | 808.899811       | 1615.808330    | 808.407803         | 11 |
| 7  | <b>800.332192</b>  | 400.669734      | 783.305643        | 392.156459       | 782.321627     | 391.664451       | A    | <b>1546.786867</b> | 773.897072         | 1529.760318        | 765.383797       | 1528.776302    | 764.891789         | 10 |
| 8  | <b>899.400606</b>  | 450.203941      | 882.374057        | 441.690666       | 881.390041     | 441.198658       | V    | <b>1475.749753</b> | 738.378515         | 1458.723204        | 729.865240       | 1457.739188    | 729.373232         | 9  |
| 9  | <b>1338.625932</b> | 669.816604      | 1321.599383       | 661.303330       | 1320.615367    | 660.811322       | Q    | <b>1376.681339</b> | 688.844308         | 1359.654790        | 680.331033       | 1358.670774    | 679.839025         | 8  |
| 10 | <b>1451.709996</b> | 726.358636      | 1434.683447       | 717.845362       | 1433.699431    | 717.353354       | L    | <b>937.456013</b>  | 469.231645         | 920.429464         | 460.718370       | 919.445448     | 460.226362         | 7  |
| 11 | <b>1550.778410</b> | 775.892843      | 1533.751861       | 767.379569       | 1532.767845    | 766.887561       | V    | <b>824.371949</b>  | 412.689613         | 807.345400         | 404.176338       | 806.361384     | 403.684330         | 6  |
| 12 | <b>1679.821003</b> | 840.414140      | 1662.794454       | 831.900865       | 1661.810438    | 831.408857       | E    | <b>725.303535</b>  | 363.155406         | <b>708.276986</b>  | 354.642131       | 707.292970     | 354.150123         | 5  |
| 13 | <b>1793.863930</b> | 897.435603      | 1776.837381       | 888.922329       | 1775.853365    | 888.430321       | N    | <b>596.260942</b>  | 298.634109         | 579.234393         | 290.120835       |                |                    | 4  |
| 14 | <b>1940.932344</b> | 970.969810      | 1923.905795       | 962.456536       | 1922.921779    | 961.964528       | F    | <b>482.218015</b>  | 241.612646         | <b>465.191466</b>  | 233.099371       |                |                    | 3  |
| 15 | 2100.962993        | 1050.985135     | 2083.936444       | 1042.471860      | 2082.952428    | 1041.979852      | C    | 335.149601         | 168.078438         | 318.123052         | 159.565164       |                |                    | 2  |
| 16 |                    |                 |                   |                  |                |                  | R    | <b>175.118952</b>  | 88.063114          | 158.092403         | 79.549839        |                |                    | 1  |

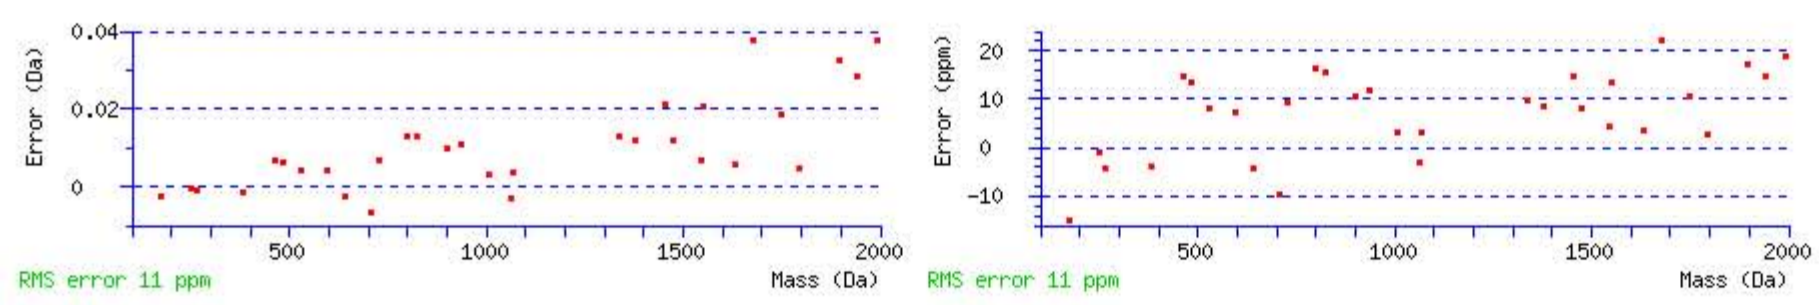

NCBI BLAST search of **HQDFNSAVQLVENFCR**  
 (Parameters: blastp, nr protein database, expect=20000, no filter, PAM30)  
 Other BLAST [web gateways](#)

### All matches to this query

| Score | Mr(calc):   | Delta    | Sequence                         |
|-------|-------------|----------|----------------------------------|
| 89.1  | 2274.067398 | 0.020910 | <a href="#">HQDFNSAVQLVENFCR</a> |
| 14.4  | 2274.067398 | 0.020910 | <a href="#">HQDFNSAVQLVENFCR</a> |

# MASCOT Search Results

## Peptide View

MS/MS Fragmentation of **LAVTTHGLPCLAWASAQAK**  
 Found in **THRB\_HUMAN**, Prothrombin OS=Homo sapiens GN=F2 PE=1 SV=2

Match to Query 45189: 2305.219168 from(1153.616860,2+) rtinseconds(2367) index(48139)  
 Title: Locus:1.1.1.3536.23 File:"2013-07-02 CLN FXIII 180 min 3rd F 4.wiff"  
 Data file C:\Program Files (x86)\Matrix Science\Mascot Daemon\mgf9 FXIII 180 min 3rd\mascot\_daemon\_merge.mgf

Click mouse within plot area to zoom in by factor of two about that point

Or, Plot from  to  Da

Label all possible matches  Label matches used for scoring

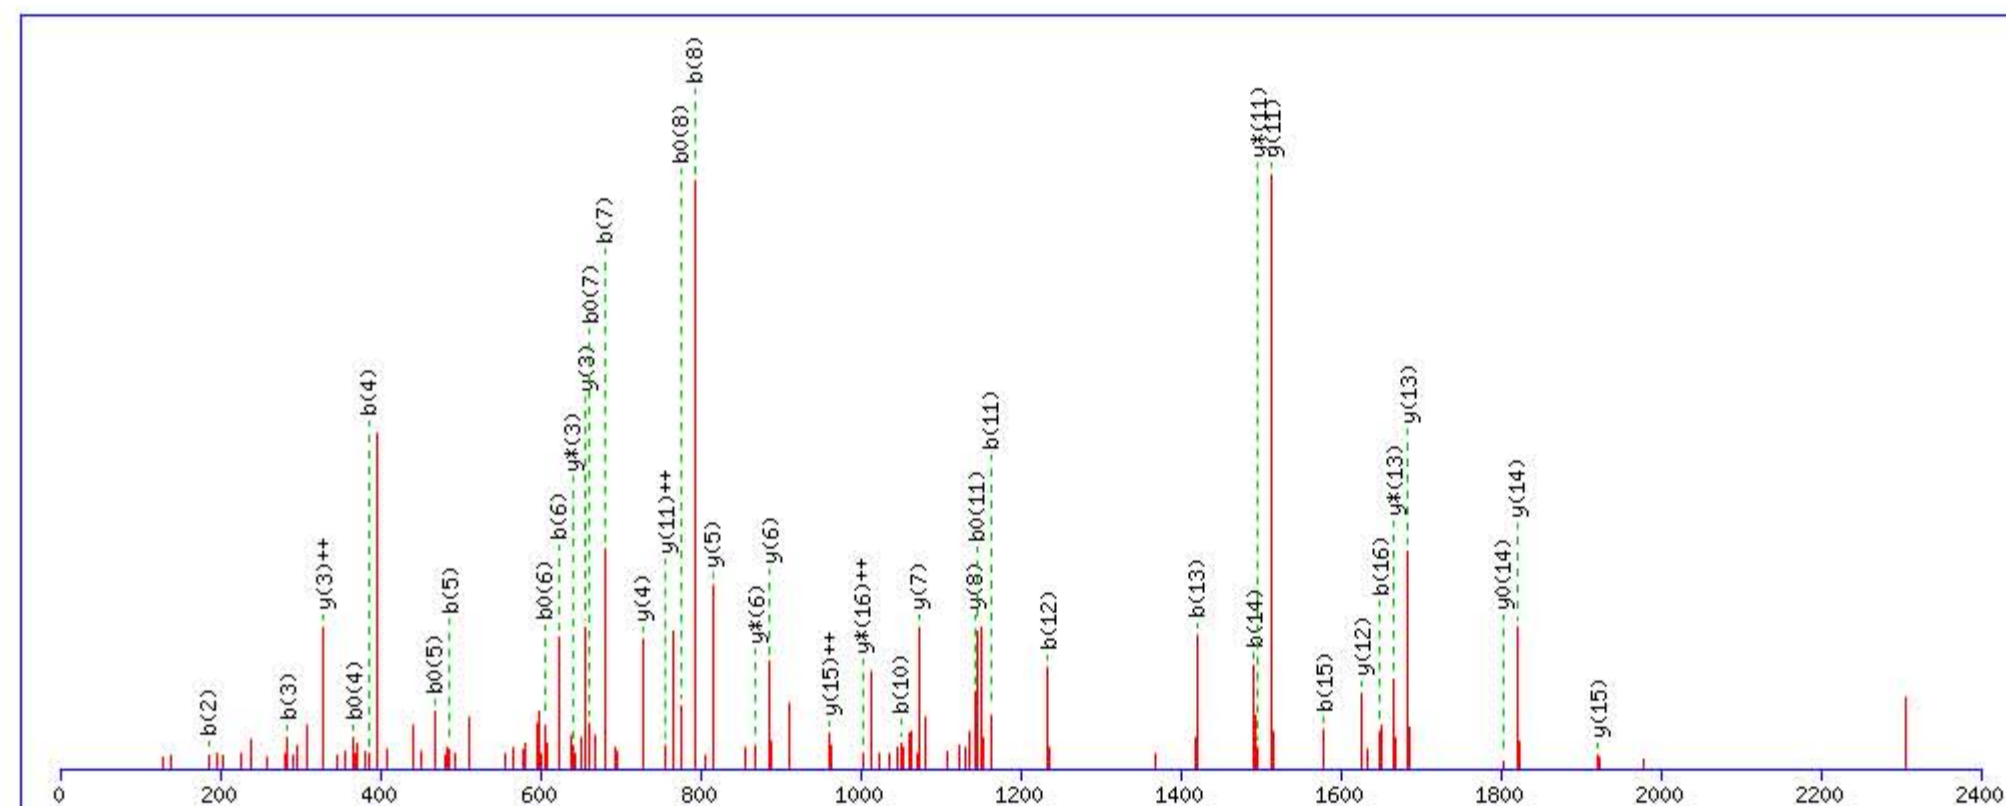

Monoisotopic mass of neutral peptide Mr(calc): 2305.207504  
 Fixed modifications: Carbamidomethyl (C) (apply to specified residues or termini only)  
 Variable modifications:  
 Q17 : Biotin:Thermo-21345 (Q)  
 Ions Score: 53 Expect: 0.00014  
 Matches : 40/170 fragment ions using 122 most intense peaks [\(help\)](#)

| #  | b                  | b <sup>++</sup> | b <sup>*</sup> | b <sup>+++</sup> | b <sup>0</sup> | b <sup>0++</sup> | Seq. | y                  | y <sup>++</sup>   | y <sup>*</sup>     | y <sup>+++</sup>   | y <sup>0</sup>     | y <sup>0++</sup> | #  |
|----|--------------------|-----------------|----------------|------------------|----------------|------------------|------|--------------------|-------------------|--------------------|--------------------|--------------------|------------------|----|
| 1  | 114.091340         | 57.549308       |                |                  |                |                  | L    |                    |                   |                    |                    |                    |                  | 19 |
| 2  | <b>185.128454</b>  | 93.067865       |                |                  |                |                  | A    | 2193.130730        | 1097.069003       | 2176.104181        | 1088.555728        | 2175.120165        | 1088.063720      | 18 |
| 3  | <b>284.196868</b>  | 142.602072      |                |                  |                |                  | V    | 2122.093616        | 1061.550446       | 2105.067067        | 1053.037171        | 2104.083051        | 1052.545163      | 17 |
| 4  | <b>385.244547</b>  | 193.125912      |                |                  | 367.233982     | 184.120629       | T    | 2023.025202        | 1012.016239       | 2005.998653        | <b>1003.502965</b> | 2005.014637        | 1003.010957      | 16 |
| 5  | <b>486.292226</b>  | 243.649751      |                |                  | 468.281661     | 234.644469       | T    | <b>1921.977523</b> | <b>961.492400</b> | 1904.950974        | 952.979125         | 1903.966958        | 952.487117       | 15 |
| 6  | <b>623.351138</b>  | 312.179207      |                |                  | 605.340573     | 303.173925       | H    | <b>1820.929844</b> | 910.968560        | 1803.903295        | 902.455286         | <b>1802.919279</b> | 901.963278       | 14 |
| 7  | <b>680.372602</b>  | 340.689939      |                |                  | 662.362037     | 331.684657       | G    | <b>1683.870932</b> | 842.439104        | <b>1666.844383</b> | 833.925830         | 1665.860367        | 833.433822       | 13 |
| 8  | <b>793.456666</b>  | 397.231971      |                |                  | 775.446101     | 388.226689       | L    | <b>1626.849468</b> | 813.928372        | 1609.822919        | 805.415098         | 1608.838903        | 804.923090       | 12 |
| 9  | 890.509430         | 445.758353      |                |                  | 872.498865     | 436.753071       | P    | <b>1513.765404</b> | <b>757.386340</b> | <b>1496.738855</b> | 748.873066         | 1495.754839        | 748.381058       | 11 |
| 10 | <b>1050.540079</b> | 525.773678      |                |                  | 1032.529514    | 516.768395       | C    | 1416.712640        | 708.859958        | 1399.686091        | 700.346684         | 1398.702075        | 699.854675       | 10 |
| 11 | <b>1163.624143</b> | 582.315710      |                |                  | 1145.613578    | 573.310427       | L    | 1256.681991        | 628.844634        | 1239.655442        | 620.331359         | 1238.671426        | 619.839351       | 9  |
| 12 | <b>1234.661257</b> | 617.834267      |                |                  | 1216.650692    | 608.828984       | A    | <b>1143.597927</b> | 572.302602        | 1126.571378        | 563.789327         | 1125.587362        | 563.297319       | 8  |
| 13 | <b>1420.740570</b> | 710.873923      |                |                  | 1402.730005    | 701.868640       | W    | <b>1072.560813</b> | 536.784045        | 1055.534264        | 528.270770         | 1054.550248        | 527.778762       | 7  |
| 14 | <b>1491.777684</b> | 746.392480      |                |                  | 1473.767119    | 737.387197       | A    | <b>886.481500</b>  | 443.744388        | <b>869.454951</b>  | 435.231114         | 868.470935         | 434.739106       | 6  |
| 15 | <b>1578.809712</b> | 789.908494      |                |                  | 1560.799147    | 780.903212       | S    | <b>815.444386</b>  | 408.225831        | 798.417837         | 399.712557         | 797.433821         | 399.220549       | 5  |
| 16 | <b>1649.846826</b> | 825.427051      |                |                  | 1631.836261    | 816.421768       | A    | <b>728.412358</b>  | 364.709817        | 711.385809         | 356.196543         |                    |                  | 4  |
| 17 | 2089.072152        | 1045.039714     | 2072.045603    | 1036.526439      | 2071.061587    | 1036.034431      | Q    | <b>657.375244</b>  | <b>329.191260</b> | <b>640.348695</b>  | 320.677986         |                    |                  | 3  |
| 18 | 2160.109266        | 1080.558271     | 2143.082717    | 1072.044996      | 2142.098701    | 1071.552988      | A    | 218.149918         | 109.578597        | 201.123369         | 101.065323         |                    |                  | 2  |
| 19 |                    |                 |                |                  |                |                  | K    | 147.112804         | 74.060040         | 130.086255         | 65.546765          |                    |                  | 1  |

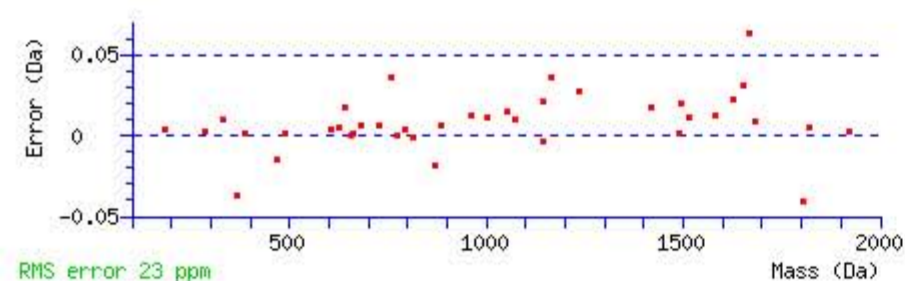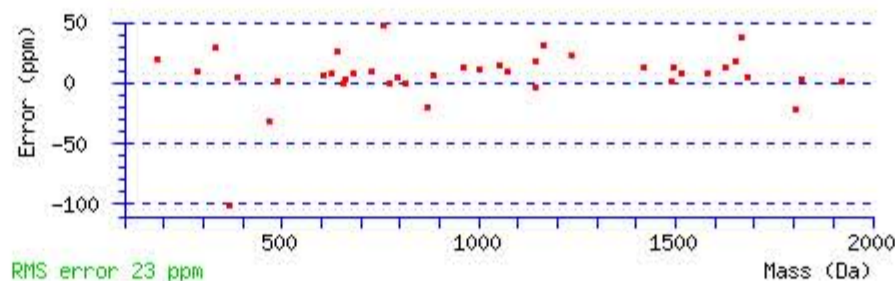

NCBI BLAST search of **LAVTTHGLPCLAWASAQAK**  
 (Parameters: blastp, nr protein database, expect=20000, no filter, PAM30)  
 Other BLAST [web gateways](#)

### All matches to this query

| Score | Mr(calc):   | Delta    | Sequence                            |
|-------|-------------|----------|-------------------------------------|
| 52.5  | 2305.207504 | 0.011664 | <a href="#">LAVTTHGLPCLAWASAQAK</a> |

# MASCOT Search Results

## Peptide View

MS/MS Fragmentation of **SEGSSVNLSPPLEQCVDR**

Found in **THRB\_HUMAN**, Prothrombin OS=Homo sapiens GN=F2 PE=1 SV=2

Match to Query 46125: 2381.140572 from(794.720800,3+) rtinseconds(2202) index(47255)

Title: Locus:1.1.1.3479.8 File:"2013-07-02 CLN FXIII 180 min 3rd F 4.wiff"

Data file C:\Program Files (x86)\Matrix Science\Mascot Daemon\mgf9 FXIII 180 min 3rd\mascot\_daemon\_merge.mgf

Click mouse within plot area to zoom in by factor of two about that point

Or, Plot from  to  Da

Label all possible matches  Label matches used for scoring

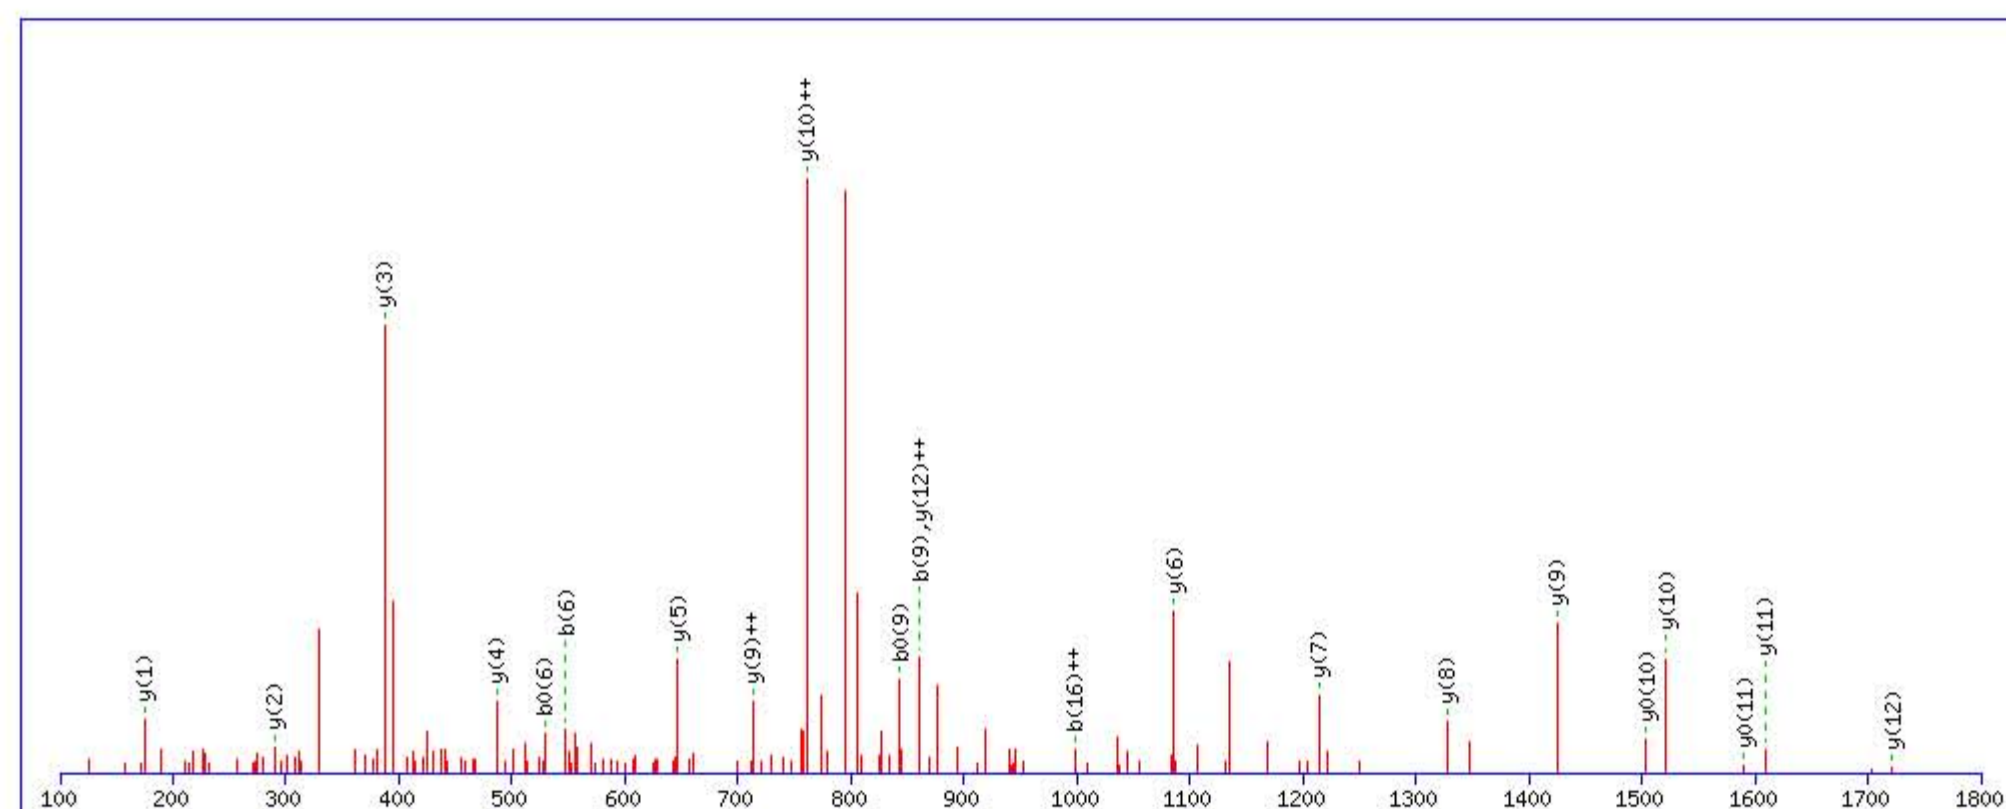

Monoisotopic mass of neutral peptide Mr(calc): 2381.135529

Fixed modifications: Carbamidomethyl (C) (apply to specified residues or termini only)

Variable modifications:

Q14 : Biotin:Thermo-21345 (Q)

Ions Score: 84 Expect: 1.7e-008

Matches : 22/202 fragment ions using 31 most intense peaks [\(help\)](#)

| #  | b                 | b <sup>++</sup>   | b <sup>*</sup> | b <sup>*++</sup> | b <sup>0</sup>    | b <sup>0++</sup> | Seq. | y                  | y <sup>++</sup>   | y <sup>*</sup> | y <sup>*++</sup> | y <sup>0</sup>     | y <sup>0++</sup> | #  |
|----|-------------------|-------------------|----------------|------------------|-------------------|------------------|------|--------------------|-------------------|----------------|------------------|--------------------|------------------|----|
| 1  | 88.039304         | 44.523290         |                |                  | 70.028739         | 35.518008        | S    |                    |                   |                |                  |                    |                  | 19 |
| 2  | 217.081897        | 109.044586        |                |                  | 199.071332        | 100.039304       | E    | 2295.110779        | 1148.059027       | 2278.084230    | 1139.545753      | 2277.100214        | 1139.053745      | 18 |
| 3  | 274.103361        | 137.555319        |                |                  | 256.092796        | 128.550036       | G    | 2166.068186        | 1083.537731       | 2149.041637    | 1075.024456      | 2148.057621        | 1074.532448      | 17 |
| 4  | 361.135389        | 181.071332        |                |                  | 343.124824        | 172.066050       | S    | 2109.046722        | 1055.026999       | 2092.020173    | 1046.513724      | 2091.036157        | 1046.021716      | 16 |
| 5  | 448.167417        | 224.587346        |                |                  | 430.156852        | 215.582064       | S    | 2022.014694        | 1011.510985       | 2004.988145    | 1002.997711      | 2004.004129        | 1002.505703      | 15 |
| 6  | <b>547.235831</b> | 274.121554        |                |                  | <b>529.225266</b> | 265.116271       | V    | 1934.982666        | 967.994971        | 1917.956117    | 959.481697       | 1916.972101        | 958.989689       | 14 |
| 7  | 661.278758        | 331.143017        | 644.252209     | 322.629742       | 643.268193        | 322.137734       | N    | 1835.914252        | 918.460764        | 1818.887703    | 909.947490       | 1817.903687        | 909.455482       | 13 |
| 8  | 774.362822        | 387.685049        | 757.336273     | 379.171774       | 756.352257        | 378.679766       | L    | <b>1721.871325</b> | <b>861.439301</b> | 1704.844776    | 852.926026       | 1703.860760        | 852.434018       | 12 |
| 9  | <b>861.394850</b> | 431.201063        | 844.368301     | 422.687788       | <b>843.384285</b> | 422.195780       | S    | <b>1608.787261</b> | 804.897269        | 1591.760712    | 796.383994       | <b>1590.776696</b> | 795.891986       | 11 |
| 10 | 958.447614        | 479.727445        | 941.421065     | 471.214170       | 940.437049        | 470.722162       | P    | <b>1521.755233</b> | <b>761.381255</b> | 1504.728684    | 752.867980       | <b>1503.744668</b> | 752.375972       | 10 |
| 11 | 1055.500378       | 528.253827        | 1038.473829    | 519.740553       | 1037.489813       | 519.248544       | P    | <b>1424.702469</b> | <b>712.854873</b> | 1407.675920    | 704.341598       | 1406.691904        | 703.849590       | 9  |
| 12 | 1168.584442       | 584.795859        | 1151.557893    | 576.282584       | 1150.573877       | 575.790576       | L    | <b>1327.649705</b> | 664.328491        | 1310.623156    | 655.815216       | 1309.639140        | 655.323208       | 8  |
| 13 | 1297.627035       | 649.317155        | 1280.600486    | 640.803881       | 1279.616470       | 640.311873       | E    | <b>1214.565641</b> | 607.786459        | 1197.539092    | 599.273184       | 1196.555076        | 598.781176       | 7  |
| 14 | 1736.852361       | 868.929819        | 1719.825812    | 860.416544       | 1718.841796       | 859.924536       | Q    | <b>1085.523048</b> | 543.265162        | 1068.496499    | 534.751888       | 1067.512483        | 534.259880       | 6  |
| 15 | 1896.883010       | 948.945143        | 1879.856461    | 940.431869       | 1878.872445       | 939.939861       | C    | <b>646.297722</b>  | 323.652499        | 629.271173     | 315.139225       | 628.287157         | 314.647217       | 5  |
| 16 | 1995.951424       | <b>998.479350</b> | 1978.924875    | 989.966076       | 1977.940859       | 989.474068       | V    | <b>486.267073</b>  | 243.637174        | 469.240524     | 235.123900       | 468.256508         | 234.631892       | 4  |
| 17 | 2093.004188       | 1047.005732       | 2075.977639    | 1038.492457      | 2074.993623       | 1038.000449      | P    | <b>387.198659</b>  | 194.102967        | 370.172110     | 185.589693       | 369.188094         | 185.097685       | 3  |
| 18 | 2208.031131       | 1104.519203       | 2191.004582    | 1096.005929      | 2190.020566       | 1095.513921      | D    | <b>290.145895</b>  | 145.576585        | 273.119346     | 137.063311       | 272.135330         | 136.571303       | 2  |
| 19 |                   |                   |                |                  |                   |                  | R    | <b>175.118952</b>  | 88.063114         | 158.092403     | 79.549839        |                    |                  | 1  |

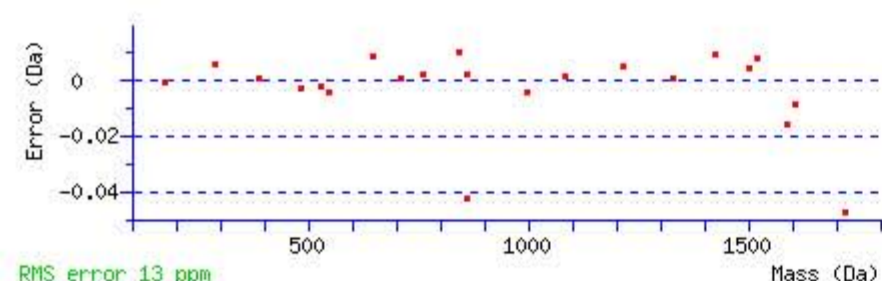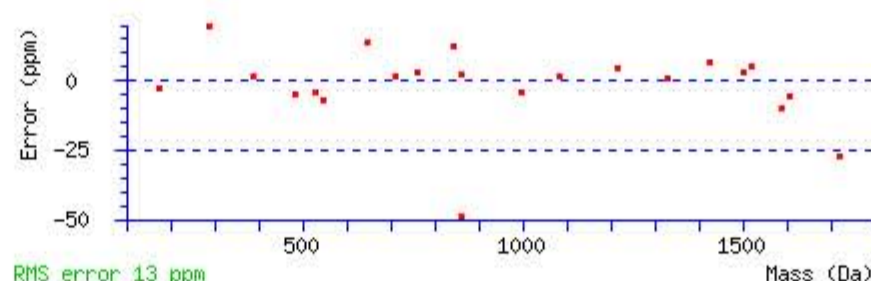

NCBI BLAST search of [SEGSSVNLSPPLEQCVDR](#)

(Parameters: blastp, nr protein database, expect=20000, no filter, PAM30)

Other BLAST [web gateways](#)

All matches to this query

| Score | Mr(calc):   | Delta     | Sequence                             |
|-------|-------------|-----------|--------------------------------------|
| 84.1  | 2381.135529 | 0.005043  | <a href="#">SEGSSVNLSPPLEQCVDR</a>   |
| 1.2   | 2381.158005 | -0.017433 | <a href="#">HPKPSTVKDCPTLCKQTDNR</a> |

Mascot: <http://www.matrixscience.com/>

# MASCOT Search Results

## Peptide View

MS/MS Fragmentation of **GQPSVLQVVNLPIVERPVCK**

Found in **THRB\_HUMAN**, Prothrombin OS=Homo sapiens GN=F2 PE=1 SV=2

Match to Query 48982: 2542.420992 from(848.480940,3+) rtinseconds(2516) index(48939)

Title: Locus:1.1.1.3588.20 File:"2013-07-02 CLN FXIII 180 min 3rd F 4.wiff"

Data file C:\Program Files (x86)\Matrix Science\Mascot Daemon\mgf9 FXIII 180 min 3rd\mascot\_daemon\_merge.mgf

Click mouse within plot area to zoom in by factor of two about that point

Or, Plot from  to  Da

Label all possible matches  Label matches used for scoring

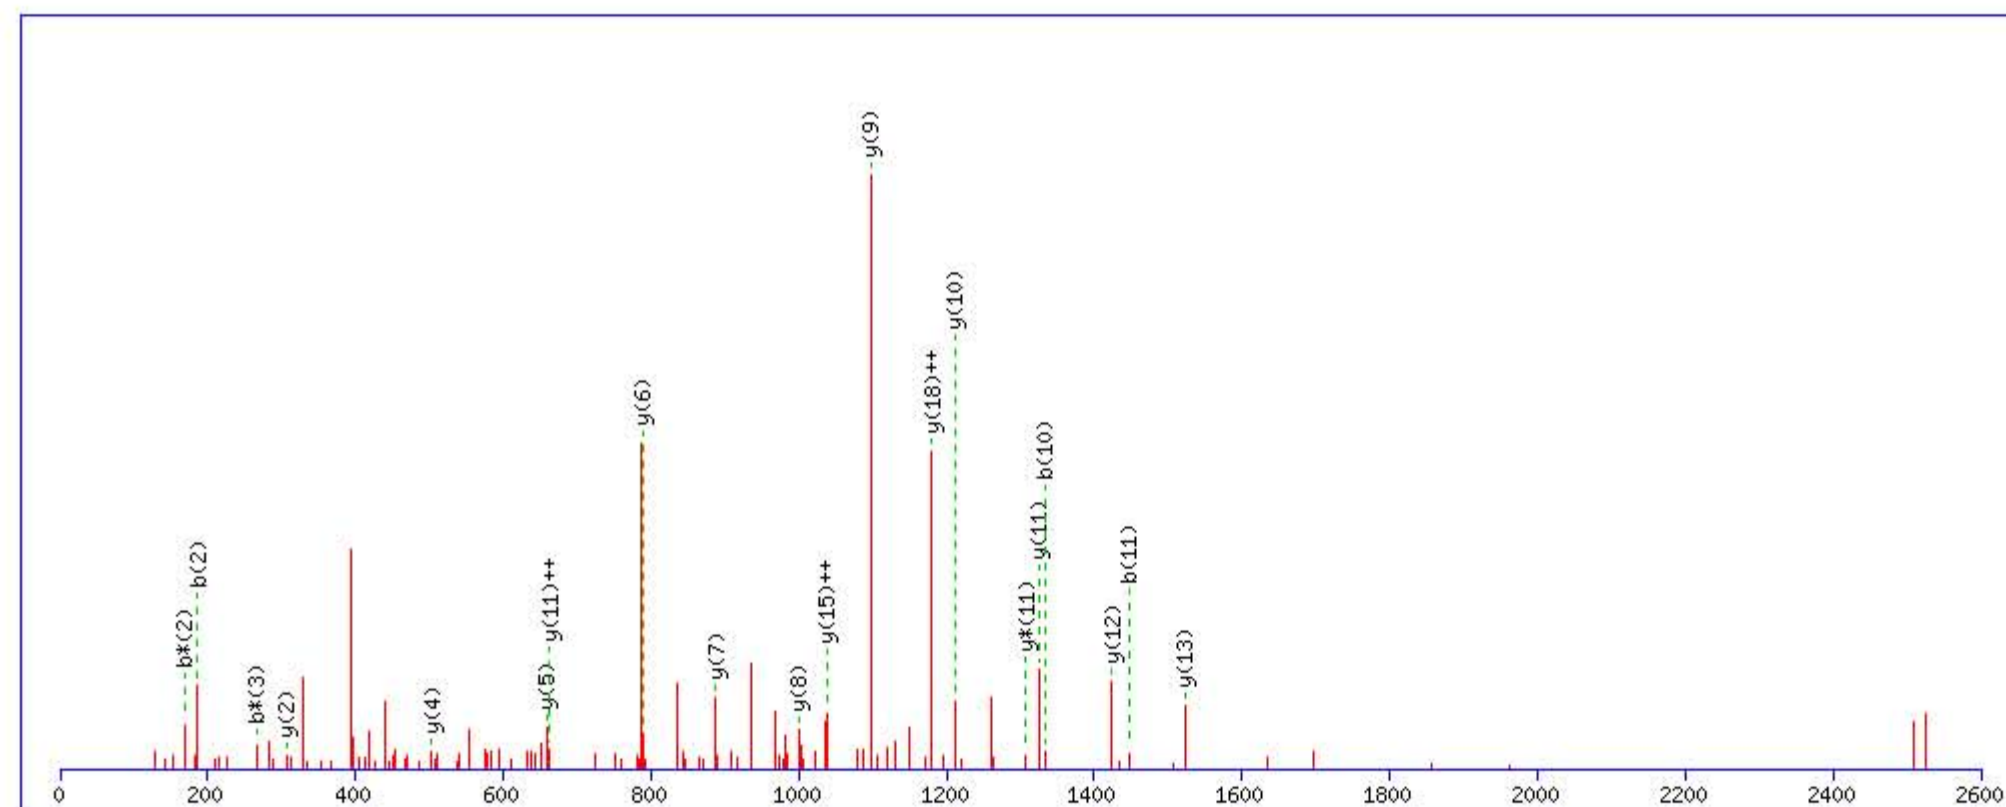

Monoisotopic mass of neutral peptide Mr(calc): 2542.412766

Fixed modifications: Carbamidomethyl (C) (apply to specified residues or termini only)

Variable modifications:

Q7 : Biotin:Thermo-21345 (Q)

Ions Score: 51 Expect: 6.8e-005

Matches : 20/210 fragment ions using 48 most intense peaks [\(help\)](#)

| #  | b                  | b <sup>++</sup> | b <sup>*</sup>    | b <sup>*++</sup> | b <sup>0</sup> | b <sup>0++</sup> | Seq. | y                  | y <sup>++</sup>    | y <sup>*</sup>     | y <sup>*++</sup> | y <sup>0</sup> | y <sup>0++</sup> | #  |
|----|--------------------|-----------------|-------------------|------------------|----------------|------------------|------|--------------------|--------------------|--------------------|------------------|----------------|------------------|----|
| 1  | 58.028740          | 29.518008       |                   |                  |                |                  | G    |                    |                    |                    |                  |                |                  | 20 |
| 2  | <b>186.087318</b>  | 93.547297       | <b>169.060769</b> | 85.034023        |                |                  | Q    | 2486.398570        | 1243.702923        | 2469.372021        | 1235.189648      | 2468.388005    | 1234.697640      | 19 |
| 3  | 283.140082         | 142.073679      | <b>266.113533</b> | 133.560405       |                |                  | P    | 2358.339992        | <b>1179.673634</b> | 2341.313443        | 1171.160359      | 2340.329427    | 1170.668351      | 18 |
| 4  | 370.172110         | 185.589693      | 353.145561        | 177.076419       | 352.161545     | 176.584411       | S    | 2261.287228        | 1131.147252        | 2244.260679        | 1122.633977      | 2243.276663    | 1122.141969      | 17 |
| 5  | 469.240524         | 235.123900      | 452.213975        | 226.610626       | 451.229959     | 226.118618       | V    | 2174.255200        | 1087.631238        | 2157.228651        | 1079.117963      | 2156.244635    | 1078.625955      | 16 |
| 6  | 582.324588         | 291.665932      | 565.298039        | 283.152658       | 564.314023     | 282.660650       | L    | 2075.186786        | <b>1038.097031</b> | 2058.160237        | 1029.583756      | 2057.176221    | 1029.091748      | 15 |
| 7  | 1021.549914        | 511.278595      | 1004.523365       | 502.765321       | 1003.539349    | 502.273313       | Q    | 1962.102722        | 981.554999         | 1945.076173        | 973.041724       | 1944.092157    | 972.549716       | 14 |
| 8  | 1120.618328        | 560.812802      | 1103.591779       | 552.299528       | 1102.607763    | 551.807520       | V    | <b>1522.877396</b> | 761.942336         | 1505.850847        | 753.429061       | 1504.866831    | 752.937053       | 13 |
| 9  | 1219.686742        | 610.347009      | 1202.660193       | 601.833735       | 1201.676177    | 601.341727       | V    | <b>1423.808982</b> | 712.408129         | 1406.782433        | 703.894854       | 1405.798417    | 703.402846       | 12 |
| 10 | <b>1333.729669</b> | 667.368473      | 1316.703120       | 658.855198       | 1315.719104    | 658.363190       | N    | <b>1324.740568</b> | <b>662.873922</b>  | <b>1307.714019</b> | 654.360647       | 1306.730003    | 653.868639       | 11 |
| 11 | <b>1446.813733</b> | 723.910505      | 1429.787184       | 715.397230       | 1428.803168    | 714.905222       | L    | <b>1210.697641</b> | 605.852458         | 1193.671092        | 597.339184       | 1192.687076    | 596.847176       | 10 |
| 12 | 1543.866497        | 772.436887      | 1526.839948       | 763.923612       | 1525.855932    | 763.431604       | P    | <b>1097.613577</b> | 549.310426         | 1080.587028        | 540.797152       | 1079.603012    | 540.305144       | 9  |
| 13 | 1656.950561        | 828.978918      | 1639.924012       | 820.465644       | 1638.939996    | 819.973636       | I    | <b>1000.560813</b> | 500.784044         | 983.534264         | 492.270770       | 982.550248     | 491.778762       | 8  |
| 14 | 1756.018975        | 878.513126      | 1738.992426       | 869.999851       | 1738.008410    | 869.507843       | V    | <b>887.476749</b>  | 444.242012         | 870.450200         | 435.728738       | 869.466184     | 435.236730       | 7  |
| 15 | 1885.061568        | 943.034422      | 1868.035019       | 934.521147       | 1867.051003    | 934.029139       | E    | <b>788.408335</b>  | 394.707805         | 771.381786         | 386.194531       | 770.397770     | 385.702523       | 6  |
| 16 | 2041.162679        | 1021.084977     | 2024.136130       | 1012.571703      | 2023.152114    | 1012.079695      | R    | <b>659.365742</b>  | 330.186509         | 642.339193         | 321.673234       |                |                  | 5  |
| 17 | 2138.215443        | 1069.611359     | 2121.188894       | 1061.098085      | 2120.204878    | 1060.606077      | P    | <b>503.264631</b>  | 252.135953         | 486.238082         | 243.622679       |                |                  | 4  |
| 18 | 2237.283857        | 1119.145566     | 2220.257308       | 1110.632292      | 2219.273292    | 1110.140284      | V    | 406.211867         | 203.609571         | 389.185318         | 195.096297       |                |                  | 3  |
| 19 | 2397.314506        | 1199.160891     | 2380.287957       | 1190.647616      | 2379.303941    | 1190.155608      | C    | <b>307.143453</b>  | 154.075364         | 290.116904         | 145.562090       |                |                  | 2  |
| 20 |                    |                 |                   |                  |                |                  | K    | 147.112804         | 74.060040          | 130.086255         | 65.546765        |                |                  | 1  |

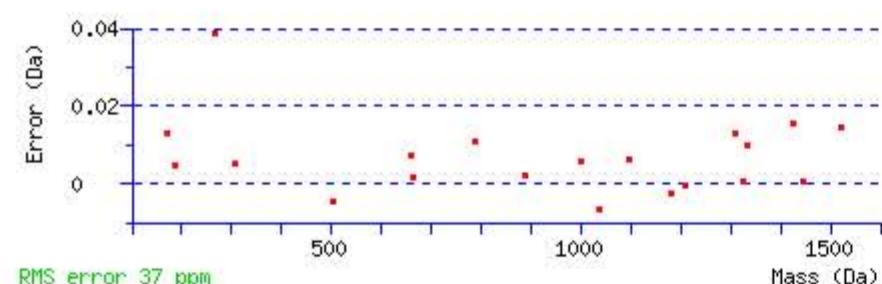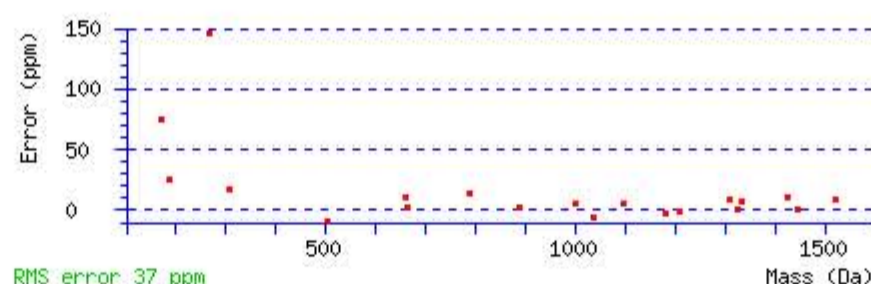

NCBI BLAST search of **GQPSVLQVVNLPIVERPVCK**

(Parameters: blastp, nr protein database, expect=20000, no filter, PAM30)

Other BLAST [web gateways](#)

All matches to this query

| Score | Mr(calc):   | Delta    | Sequence                             |
|-------|-------------|----------|--------------------------------------|
| 51.0  | 2542.412766 | 0.008226 | <a href="#">GQPSVLQVVNLPIVERPVCK</a> |
| 41.4  | 2542.412766 | 0.008226 | <a href="#">GQPSVLQVVNLPIVERPVCK</a> |

# MASCOT Search Results

## Peptide View

MS/MS Fragmentation of **IVEGSDAEIGMSPWQVMLFR**  
 Found in **THRB\_HUMAN**, Prothrombin OS=Homo sapiens GN=F2 PE=1 SV=2

Match to Query 49434: 2591.271192 from(864.764340,3+) rtinseconds(2876) index(51385)  
 Title: Locus:1.1.1.3711.20 File:"2013-07-02 CLN FXIII 180 min 3rd F 4.wiff"  
 Data file C:\Program Files (x86)\Matrix Science\Mascot Daemon\mgf\9 FXIII 180 min 3rd\mascot\_daemon\_merge.mgf

Click mouse within plot area to zoom in by factor of two about that point  
 Or, Plot from  to  Da   
 Label all possible matches  Label matches used for scoring

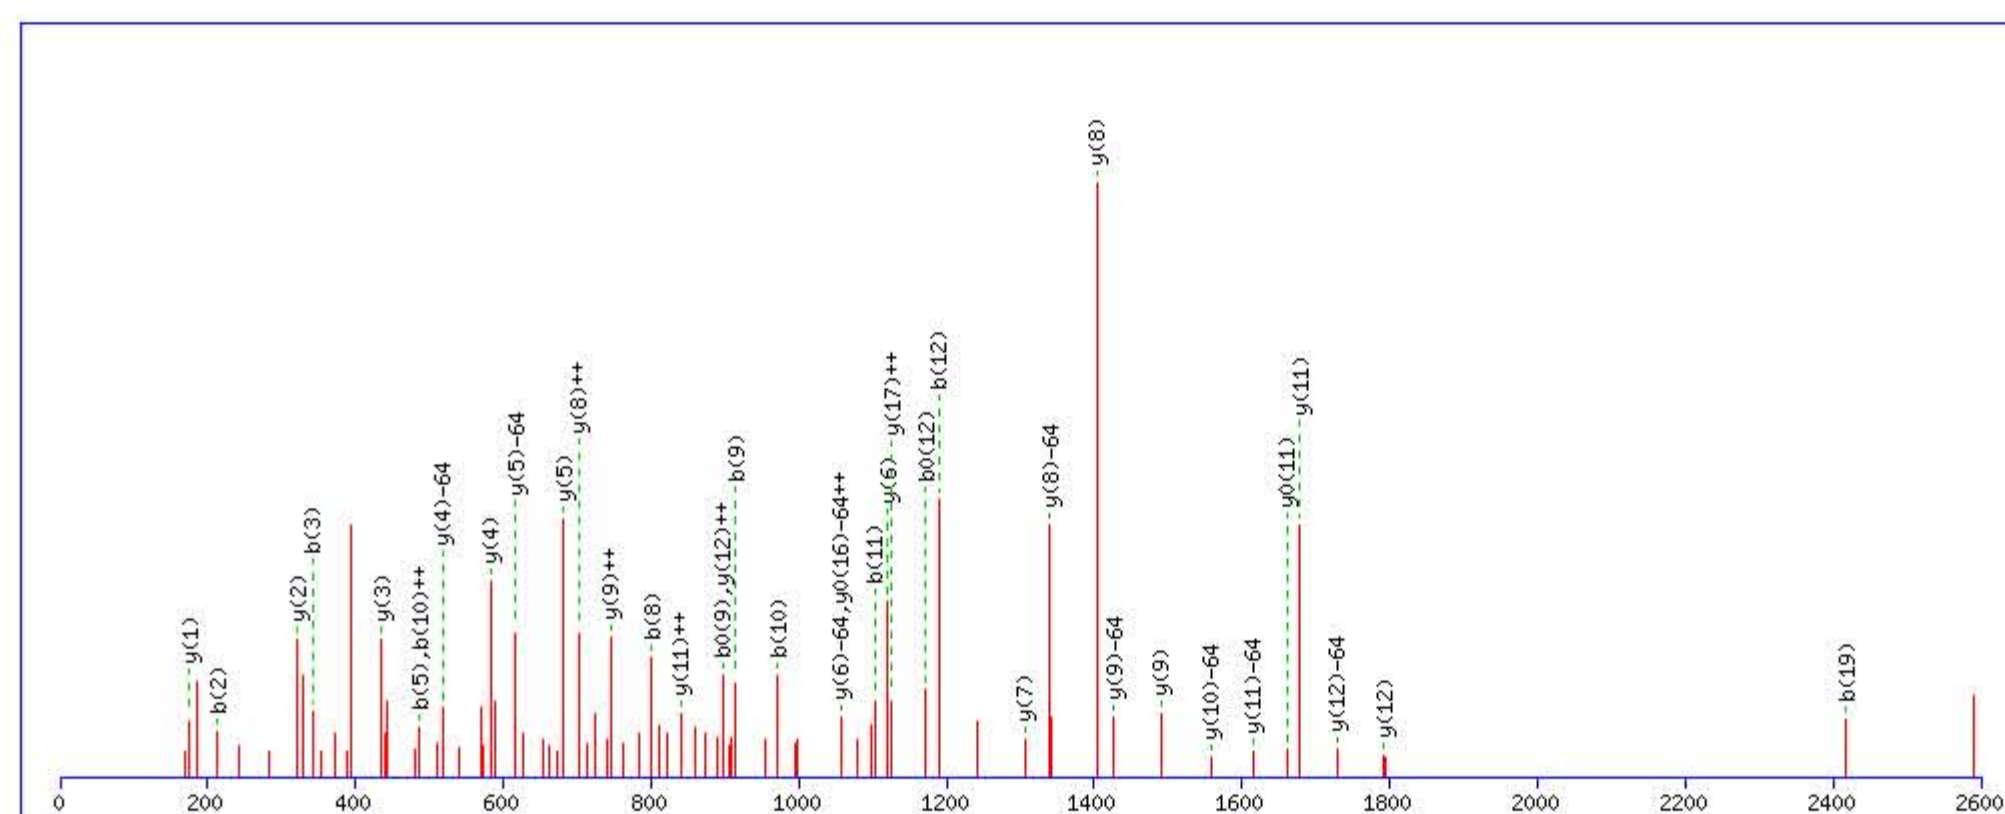

Monoisotopic mass of neutral peptide Mr(calc): 2591.258621  
 Fixed modifications: Carbamidomethyl (C) (apply to specified residues or termini only)  
 Variable modifications:  
 Q15 : Biotin:Thermo-21345 (Q)  
 M17 : Oxidation (M), with neutral losses 0.000000 (shown in table), 63.998285  
 Ions Score: 81 Expect: 2.3e-007  
 Matches : 38/284 fragment ions using 48 most intense peaks [\(help\)](#)

| #  | b                  | b <sup>++</sup>   | b <sup>*</sup> | b <sup>*++</sup> | b <sup>0</sup>     | b <sup>0++</sup> | Seq. | y                  | y <sup>++</sup>    | y <sup>*</sup> | y <sup>*++</sup> | y <sup>0</sup>     | y <sup>0++</sup> | #  |
|----|--------------------|-------------------|----------------|------------------|--------------------|------------------|------|--------------------|--------------------|----------------|------------------|--------------------|------------------|----|
| 1  | 114.091340         | 57.549308         |                |                  |                    |                  | I    |                    |                    |                |                  |                    |                  | 20 |
| 2  | <b>213.159754</b>  | 107.083515        |                |                  |                    |                  | V    | 2479.181837        | 1240.094556        | 2462.155288    | 1231.581282      | 2461.171272        | 1231.089274      | 19 |
| 3  | <b>342.202347</b>  | 171.604811        |                |                  | 324.191782         | 162.599529       | E    | 2380.113423        | 1190.560349        | 2363.086874    | 1182.047075      | 2362.102858        | 1181.555067      | 18 |
| 4  | 399.223811         | 200.115543        |                |                  | 381.213246         | 191.110261       | G    | 2251.070830        | <b>1126.039053</b> | 2234.044281    | 1117.525778      | 2233.060265        | 1117.033770      | 17 |
| 5  | <b>486.255839</b>  | 243.631557        |                |                  | 468.245274         | 234.626275       | S    | 2194.049366        | 1097.528321        | 2177.022817    | 1089.015046      | 2176.038801        | 1088.523038      | 16 |
| 6  | 601.282782         | 301.145029        |                |                  | 583.272217         | 292.139747       | D    | 2107.017338        | 1054.012307        | 2089.990789    | 1045.499032      | 2089.006773        | 1045.007024      | 15 |
| 7  | 672.319896         | 336.663586        |                |                  | 654.309331         | 327.658303       | A    | 1991.990395        | 996.498836         | 1974.963846    | 987.985561       | 1973.979830        | 987.493553       | 14 |
| 8  | <b>801.362489</b>  | 401.184883        |                |                  | 783.351924         | 392.179600       | E    | 1920.953281        | 960.980279         | 1903.926732    | 952.467004       | 1902.942716        | 951.974996       | 13 |
| 9  | <b>914.446553</b>  | 457.726915        |                |                  | <b>896.435988</b>  | 448.721632       | I    | <b>1791.910688</b> | <b>896.458982</b>  | 1774.884139    | 887.945708       | 1773.900123        | 887.453700       | 12 |
| 10 | <b>971.468017</b>  | <b>486.237647</b> |                |                  | 953.457452         | 477.232364       | G    | <b>1678.826624</b> | <b>839.916950</b>  | 1661.800075    | 831.403676       | <b>1660.816059</b> | 830.911668       | 11 |
| 11 | <b>1102.508502</b> | 551.757889        |                |                  | 1084.497937        | 542.752606       | M    | 1621.805160        | 811.406218         | 1604.778611    | 802.892944       | 1603.794595        | 802.400936       | 10 |
| 12 | <b>1189.540530</b> | 595.273903        |                |                  | <b>1171.529965</b> | 586.268621       | S    | <b>1490.764675</b> | <b>745.885976</b>  | 1473.738126    | 737.372701       | 1472.754110        | 736.880693       | 9  |
| 13 | 1286.593294        | 643.800285        |                |                  | 1268.582729        | 634.795003       | P    | <b>1403.732647</b> | <b>702.369962</b>  | 1386.706098    | 693.856687       |                    |                  | 8  |
| 14 | 1472.672607        | 736.839942        |                |                  | 1454.662042        | 727.834659       | W    | <b>1306.679883</b> | 653.843580         | 1289.653334    | 645.330305       |                    |                  | 7  |
| 15 | 1911.897933        | 956.452605        | 1894.871384    | 947.939330       | 1893.887368        | 947.447322       | Q    | <b>1120.600570</b> | 560.803923         | 1103.574021    | 552.290649       |                    |                  | 6  |
| 16 | 2010.966347        | 1005.986812       | 1993.939798    | 997.473537       | 1992.955782        | 996.981529       | V    | <b>681.375244</b>  | 341.191260         | 664.348695     | 332.677986       |                    |                  | 5  |
| 17 | 2158.001747        | 1079.504511       | 2140.975198    | 1070.991237      | 2139.991182        | 1070.499229      | M    | <b>582.306830</b>  | 291.657053         | 565.280281     | 283.143779       |                    |                  | 4  |
| 18 | 2271.085811        | 1136.046543       | 2254.059262    | 1127.533269      | 2253.075246        | 1127.041261      | L    | <b>435.271430</b>  | 218.139353         | 418.244881     | 209.626078       |                    |                  | 3  |
| 19 | <b>2418.154225</b> | 1209.580750       | 2401.127676    | 1201.067476      | 2400.143660        | 1200.575468      | F    | <b>322.187366</b>  | 161.597321         | 305.160817     | 153.084046       |                    |                  | 2  |
| 20 |                    |                   |                |                  |                    |                  | R    | <b>175.118952</b>  | 88.063114          | 158.092403     | 79.549839        |                    |                  | 1  |

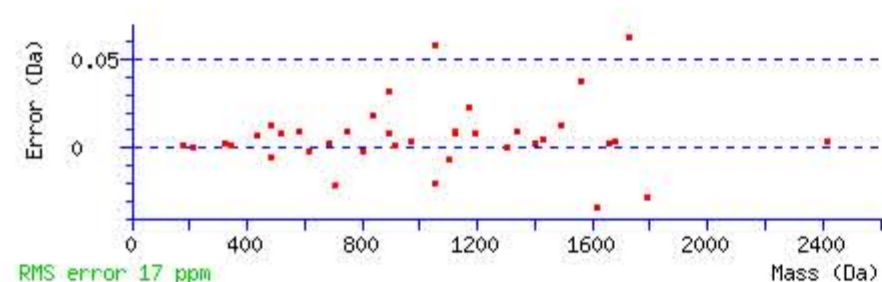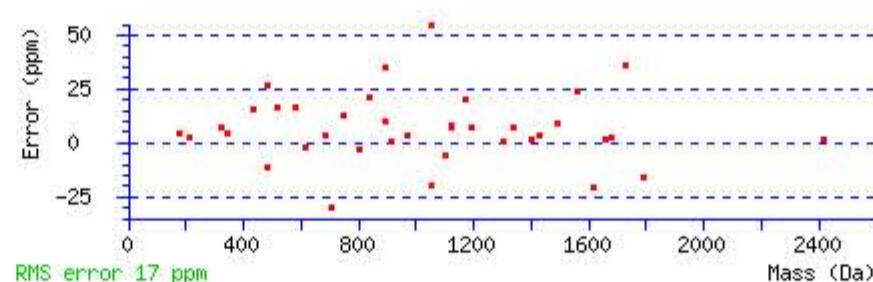

NCBI BLAST search of **IVEGSDAEIGMSPWQVMLFR**  
 (Parameters: blastp, nr protein database, expect=20000, no filter, PAM30)  
 Other BLAST [web gateways](#)

### All matches to this query

| Score | Mr(calc):   | Delta    | Sequence                             |
|-------|-------------|----------|--------------------------------------|
| 80.7  | 2591.258621 | 0.012571 | <a href="#">IVEGSDAEIGMSPWQVMLFR</a> |
| 16.4  | 2591.258621 | 0.012571 | <a href="#">IVEGSDAEIGMSPWQVMLFR</a> |

# MASCOT Search Results

## Peptide View

MS/MS Fragmentation of **RQECSIPVCGQDQVTVAMTPR**

Found in **THRB\_HUMAN**, Prothrombin OS=Homo sapiens GN=F2 PE=1 SV=2

Match to Query 50843: 2742.306642 from(915.109490,3+) rtinseconds(2048) index(46328)

Title: Locus:1.1.1.3425.11 File:"2013-07-02 CLN FXIII 180 min 3rd F 4.wiff"

Data file C:\Program Files (x86)\Matrix Science\Mascot Daemon\mgf9 FXIII 180 min 3rd\mascot\_daemon\_merge.mgf

Click mouse within plot area to zoom in by factor of two about that point

Or, Plot from  to  Da

Label all possible matches  Label matches used for scoring

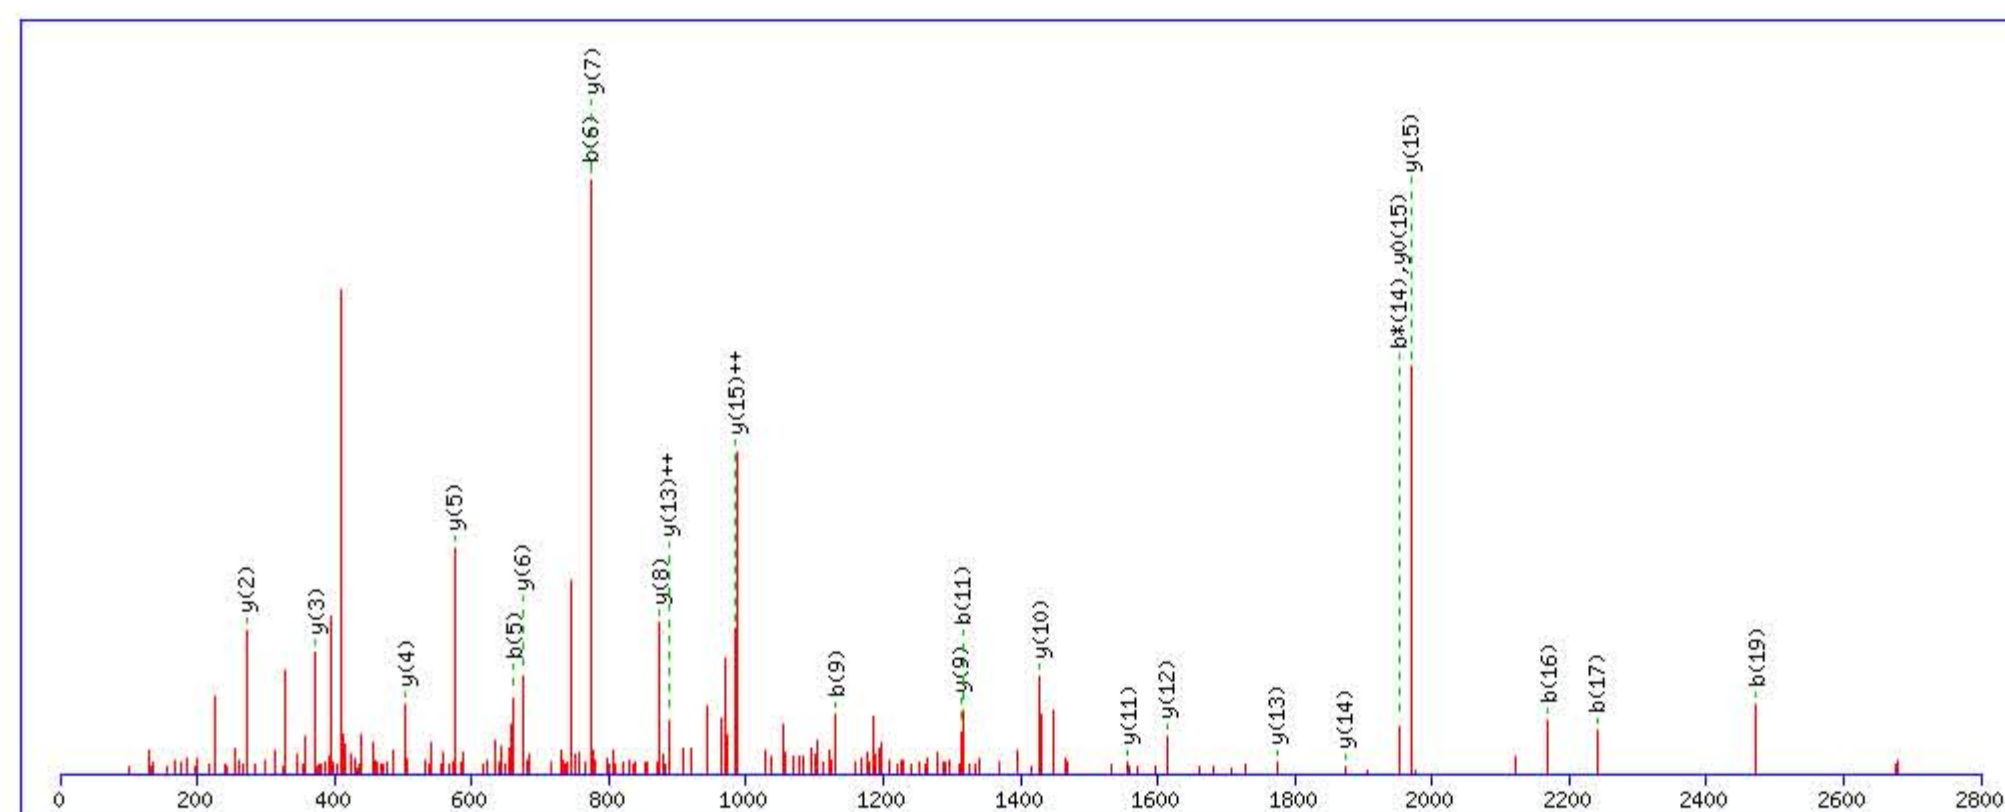

Monoisotopic mass of neutral peptide  $M_r(\text{calc})$ : 2742.307404

Fixed modifications: Carbamidomethyl (C) (apply to specified residues or termini only)

Variable modifications:

Q13 : Biotin:Thermo-21345 (Q)

Ions Score: 85 Expect: 6.6e-008

Matches : 25/232 fragment ions using 44 most intense peaks [\(help\)](#)

| #  | b                  | b <sup>++</sup> | b <sup>*</sup>     | b <sup>*++</sup> | b <sup>0</sup> | b <sup>0++</sup> | Seq. | y                  | y <sup>++</sup>   | y <sup>*</sup> | y <sup>*++</sup> | y <sup>0</sup>     | y <sup>0++</sup> | #  |
|----|--------------------|-----------------|--------------------|------------------|----------------|------------------|------|--------------------|-------------------|----------------|------------------|--------------------|------------------|----|
| 1  | 157.108387         | 79.057831       | 140.081838         | 70.544557        |                |                  | R    |                    |                   |                |                  |                    |                  | 21 |
| 2  | 285.166965         | 143.087121      | 268.140416         | 134.573846       |                |                  | Q    | 2587.213551        | 1294.110413       | 2570.187002    | 1285.597139      | 2569.202986        | 1285.105131      | 20 |
| 3  | 414.209558         | 207.608417      | 397.183009         | 199.095143       | 396.198993     | 198.603135       | E    | 2459.154973        | 1230.081124       | 2442.128424    | 1221.567850      | 2441.144408        | 1221.075842      | 19 |
| 4  | 574.240207         | 287.623742      | 557.213658         | 279.110467       | 556.229642     | 278.618459       | C    | 2330.112380        | 1165.559828       | 2313.085831    | 1157.046553      | 2312.101815        | 1156.554545      | 18 |
| 5  | <b>661.272235</b>  | 331.139756      | 644.245686         | 322.626481       | 643.261670     | 322.134473       | S    | 2170.081731        | 1085.544503       | 2153.055182    | 1077.031229      | 2152.071166        | 1076.539221      | 17 |
| 6  | <b>774.356299</b>  | 387.681788      | 757.329750         | 379.168513       | 756.345734     | 378.676505       | I    | 2083.049703        | 1042.028489       | 2066.023154    | 1033.515215      | 2065.039138        | 1033.023207      | 16 |
| 7  | 871.409063         | 436.208170      | 854.382514         | 427.694895       | 853.398498     | 427.202887       | P    | <b>1969.965639</b> | <b>985.486458</b> | 1952.939090    | 976.973183       | <b>1951.955074</b> | 976.481175       | 15 |
| 8  | 970.477477         | 485.742377      | 953.450928         | 477.229102       | 952.466912     | 476.737094       | V    | <b>1872.912875</b> | 936.960076        | 1855.886326    | 928.446801       | 1854.902310        | 927.954793       | 14 |
| 9  | <b>1130.508126</b> | 565.757701      | 1113.481577        | 557.244427       | 1112.497561    | 556.752418       | C    | <b>1773.844461</b> | <b>887.425868</b> | 1756.817912    | 878.912594       | 1755.833896        | 878.420586       | 13 |
| 10 | 1187.529590        | 594.268433      | 1170.503041        | 585.755158       | 1169.519025    | 585.263150       | G    | <b>1613.813812</b> | 807.410544        | 1596.787263    | 798.897270       | 1595.803247        | 798.405262       | 12 |
| 11 | <b>1315.588168</b> | 658.297722      | 1298.561619        | 649.784448       | 1297.577603    | 649.292440       | Q    | <b>1556.792348</b> | 778.899812        | 1539.765799    | 770.386538       | 1538.781783        | 769.894530       | 11 |
| 12 | 1430.615111        | 715.811194      | 1413.588562        | 707.297919       | 1412.604546    | 706.805911       | D    | <b>1428.733770</b> | 714.870523        | 1411.707221    | 706.357249       | 1410.723205        | 705.865241       | 10 |
| 13 | 1869.840437        | 935.423857      | 1852.813888        | 926.910582       | 1851.829872    | 926.418574       | Q    | <b>1313.706827</b> | 657.357052        | 1296.680278    | 648.843777       | 1295.696262        | 648.351769       | 9  |
| 14 | 1968.908851        | 984.958064      | <b>1951.882302</b> | 976.444789       | 1950.898286    | 975.952781       | V    | <b>874.481501</b>  | 437.744389        | 857.454952     | 429.231114       | 856.470936         | 428.739106       | 8  |
| 15 | 2069.956530        | 1035.481903     | 2052.929981        | 1026.968628      | 2051.945965    | 1026.476620      | T    | <b>775.413087</b>  | 388.210181        | 758.386538     | 379.696907       | 757.402522         | 379.204899       | 7  |
| 16 | <b>2169.024944</b> | 1085.016110     | 2151.998395        | 1076.502835      | 2151.014379    | 1076.010827      | V    | <b>674.365408</b>  | 337.686342        | 657.338859     | 329.173067       | 656.354843         | 328.681059       | 6  |
| 17 | <b>2240.062058</b> | 1120.534667     | 2223.035509        | 1112.021392      | 2222.051493    | 1111.529384      | A    | <b>575.296994</b>  | 288.152135        | 558.270445     | 279.638861       | 557.286429         | 279.146853       | 5  |
| 18 | 2371.102543        | 1186.054909     | 2354.075994        | 1177.541635      | 2353.091978    | 1177.049627      | M    | <b>504.259880</b>  | 252.633578        | 487.233331     | 244.120303       | 486.249315         | 243.628295       | 4  |
| 19 | <b>2472.150222</b> | 1236.578749     | 2455.123673        | 1228.065474      | 2454.139657    | 1227.573466      | T    | <b>373.219395</b>  | 187.113335        | 356.192846     | 178.600061       | 355.208830         | 178.108053       | 3  |
| 20 | 2569.202986        | 1285.105131     | 2552.176437        | 1276.591856      | 2551.192421    | 1276.099848      | P    | <b>272.171716</b>  | 136.589496        | 255.145167     | 128.076221       |                    |                  | 2  |
| 21 |                    |                 |                    |                  |                |                  | R    | 175.118952         | 88.063114         | 158.092403     | 79.549839        |                    |                  | 1  |

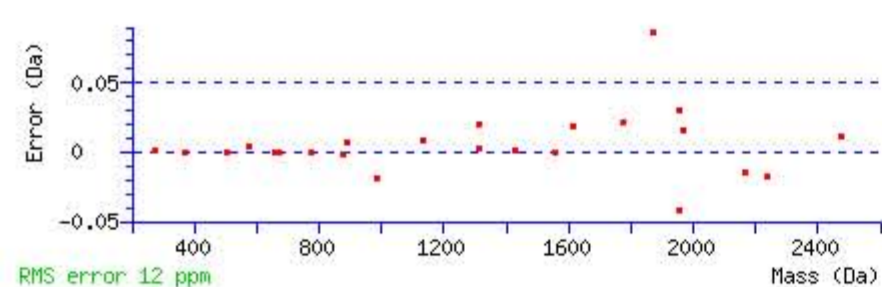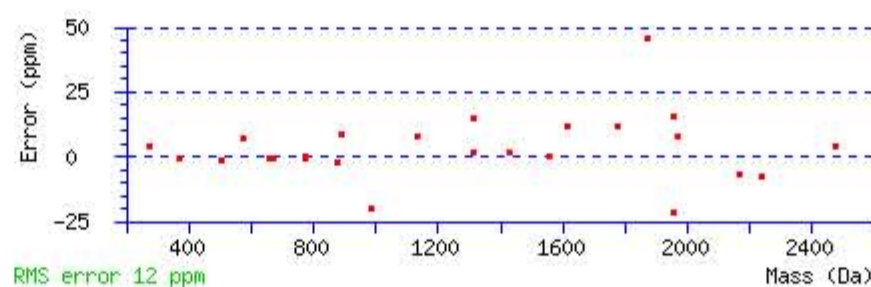

NCBI BLAST search of **RQECSIPVCGQDQVTVAMTPR**

(Parameters: blastp, nr protein database, expect=20000, no filter, PAM30)

Other BLAST [web gateways](#)

All matches to this query

| Score | $M_r(\text{calc})$ : | Delta     | Sequence                              |
|-------|----------------------|-----------|---------------------------------------|
| 85.4  | 2742.307404          | -0.000762 | <a href="#">RQECSIPVCGQDQVTVAMTPR</a> |
| 60.1  | 2742.307404          | -0.000762 | <a href="#">RQECSIPVCGQDQVTVAMTPR</a> |
| 12.6  | 2742.307404          | -0.000762 | <a href="#">RQECSIPVCGQDQVTVAMTPR</a> |

# MASCOT Search Results

## Peptide View

MS/MS Fragmentation of **DMPASEDLQDLQK**

Found in **SEPP1\_HUMAN**, Selenoprotein P OS=Homo sapiens GN=SEPP1 PE=1 SV=3

Match to Query 36059: 1815.843102 from(606.288310,3+) rtinseconds(2085) index(5389)

Title: Locus:1.1.1.3246.7 File:"2013-07-02 CLN FXIII 180 min 3rd F 1.wiff"

Data file C:\Program Files (x86)\Matrix Science\Mascot Daemon\mgf\9 FXIII 180 min 3rd\mascot\_daemon\_merge.mgf

Click mouse within plot area to zoom in by factor of two about that point

Or, Plot from  to  Da

Label all possible matches  Label matches used for scoring

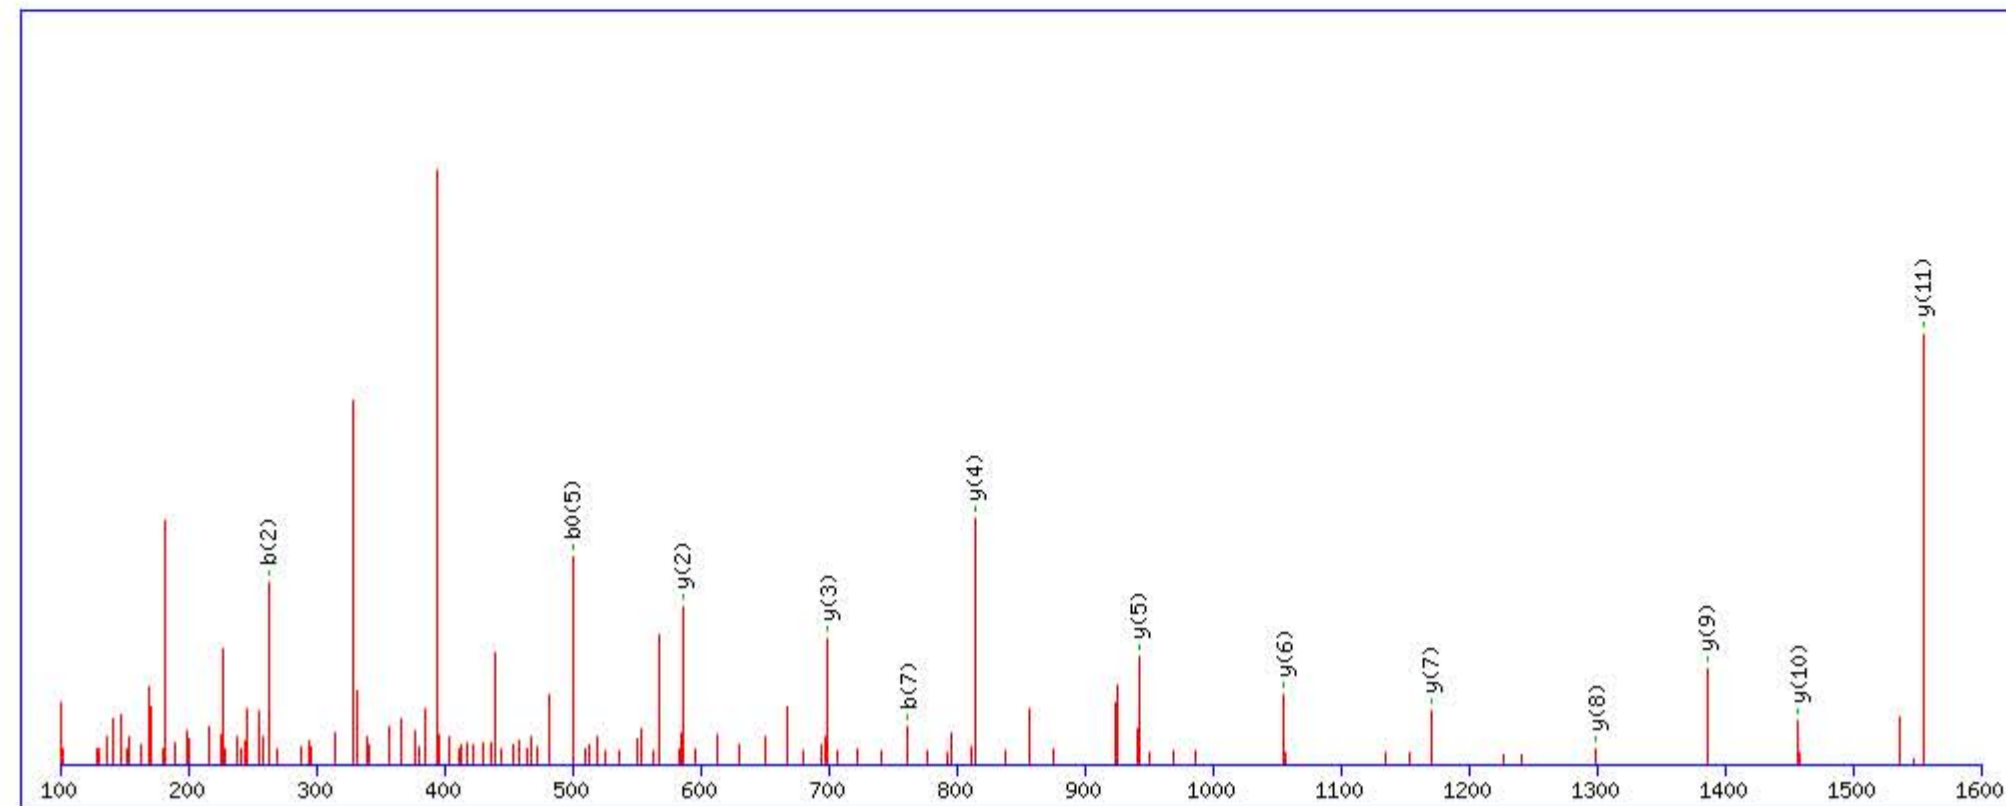

Monoisotopic mass of neutral peptide Mr(calc): 1815.838272

Fixed modifications: Carbamidomethyl (C) (apply to specified residues or termini only)

Variable modifications:

M2 : Oxidation (M), with neutral losses 0.000000 (shown in table), 63.998285

Q12 : Biotin:Thermo-21345 (Q)

Ions Score: 93 Expect: 7.3e-009

Matches : 13/180 fragment ions using 15 most intense peaks [\(help\)](#)

| #  | b                 | b <sup>++</sup> | b <sup>*</sup> | b <sup>++</sup> | b <sup>0</sup>    | b <sup>0++</sup> | Seq. | y                  | y <sup>++</sup> | y <sup>*</sup> | y <sup>++</sup> | y <sup>0</sup> | y <sup>0++</sup> | #  |
|----|-------------------|-----------------|----------------|-----------------|-------------------|------------------|------|--------------------|-----------------|----------------|-----------------|----------------|------------------|----|
| 1  | 116.034219        | 58.520748       |                |                 | 98.023654         | 49.515465        | D    |                    |                 |                |                 |                |                  | 13 |
| 2  | <b>263.069619</b> | 132.038447      |                |                 | 245.059054        | 123.033165       | M    | 1701.818621        | 851.412948      | 1684.792072    | 842.899674      | 1683.808056    | 842.407666       | 12 |
| 3  | 360.122383        | 180.564829      |                |                 | 342.111818        | 171.559547       | P    | <b>1554.783221</b> | 777.895248      | 1537.756672    | 769.381974      | 1536.772656    | 768.889966       | 11 |
| 4  | 431.159497        | 216.083386      |                |                 | 413.148932        | 207.078104       | A    | <b>1457.730457</b> | 729.368866      | 1440.703908    | 720.855592      | 1439.719892    | 720.363584       | 10 |
| 5  | 518.191525        | 259.599401      |                |                 | <b>500.180960</b> | 250.594118       | S    | <b>1386.693343</b> | 693.850310      | 1369.666794    | 685.337035      | 1368.682778    | 684.845027       | 9  |
| 6  | 647.234118        | 324.120697      |                |                 | 629.223553        | 315.115414       | E    | <b>1299.661315</b> | 650.334296      | 1282.634766    | 641.821021      | 1281.650750    | 641.329013       | 8  |
| 7  | <b>762.261061</b> | 381.634168      |                |                 | 744.250496        | 372.628886       | D    | <b>1170.618722</b> | 585.812999      | 1153.592173    | 577.299725      | 1152.608157    | 576.807716       | 7  |
| 8  | 875.345125        | 438.176200      |                |                 | 857.334560        | 429.170918       | L    | <b>1055.591779</b> | 528.299528      | 1038.565230    | 519.786253      | 1037.581214    | 519.294245       | 6  |
| 9  | 1003.403703       | 502.205490      | 986.377154     | 493.692215      | 985.393138        | 493.200207       | Q    | <b>942.507715</b>  | 471.757496      | 925.481166     | 463.244221      | 924.497150     | 462.752213       | 5  |
| 10 | 1118.430646       | 559.718961      | 1101.404097    | 551.205687      | 1100.420081       | 550.713679       | D    | <b>814.449137</b>  | 407.728207      | 797.422588     | 399.214932      | 796.438572     | 398.722924       | 4  |
| 11 | 1231.514710       | 616.260993      | 1214.488161    | 607.747719      | 1213.504145       | 607.255710       | L    | <b>699.422194</b>  | 350.214735      | 682.395645     | 341.701461      |                |                  | 3  |
| 12 | 1670.740036       | 835.873656      | 1653.713487    | 827.360382      | 1652.729471       | 826.868373       | Q    | <b>586.338130</b>  | 293.672703      | 569.311581     | 285.159429      |                |                  | 2  |
| 13 |                   |                 |                |                 |                   |                  | K    | 147.112804         | 74.060040       | 130.086255     | 65.546765       |                |                  | 1  |

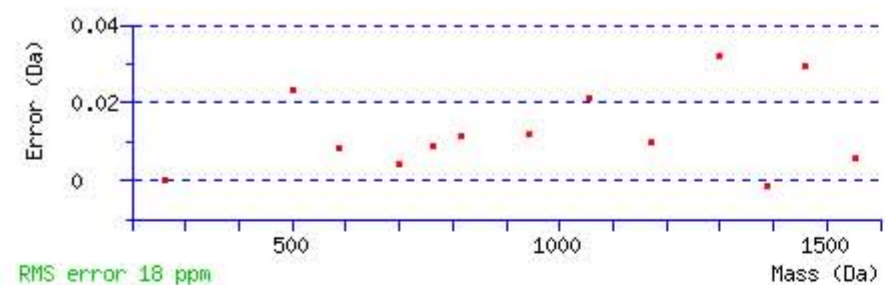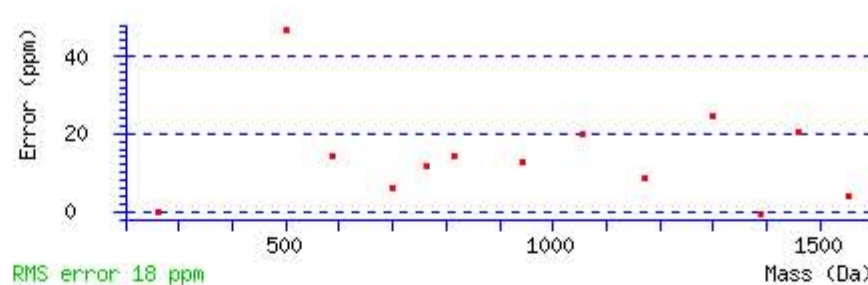

NCBI BLAST search of **DMPASEDLQDLQK**

(Parameters: blastp, nr protein database, expect=20000, no filter, PAM30)

Other BLAST [web gateways](#)

All matches to this query

| Score | Mr(calc):   | Delta    | Sequence                      |
|-------|-------------|----------|-------------------------------|
| 92.5  | 1815.838272 | 0.004830 | <a href="#">DMPASEDLQDLQK</a> |
| 44.6  | 1815.838272 | 0.004830 | <a href="#">DMPASEDLQDLQK</a> |

Mascot: <http://www.matrixscience.com/>



# MASCOT SEARCH RESULTS

## Peptide View

MS/MS Fragmentation of **HQTVPQNTGGK**

Found in **TRFE\_HUMAN**, Serotransferrin OS=Homo sapiens GN=TF PE=1 SV=3

Match to Query 26562: 1476.747612 from(493.256480,3+) rtinseconds(1240) index(56652)

Title: Locus:1.1.1.1343.5 File:"2013-07-02 CLN FXIII 180 min 3rd FT.wiff"

Data file C:\Program Files (x86)\Matrix Science\Mascot Daemon\mgf\9 FXIII 180 min 3rd\mascot\_daemon\_merge.mgf

Click mouse within plot area to zoom in by factor of two about that point

Or, Plot from  to  Da

Label all possible matches  Label matches used for scoring

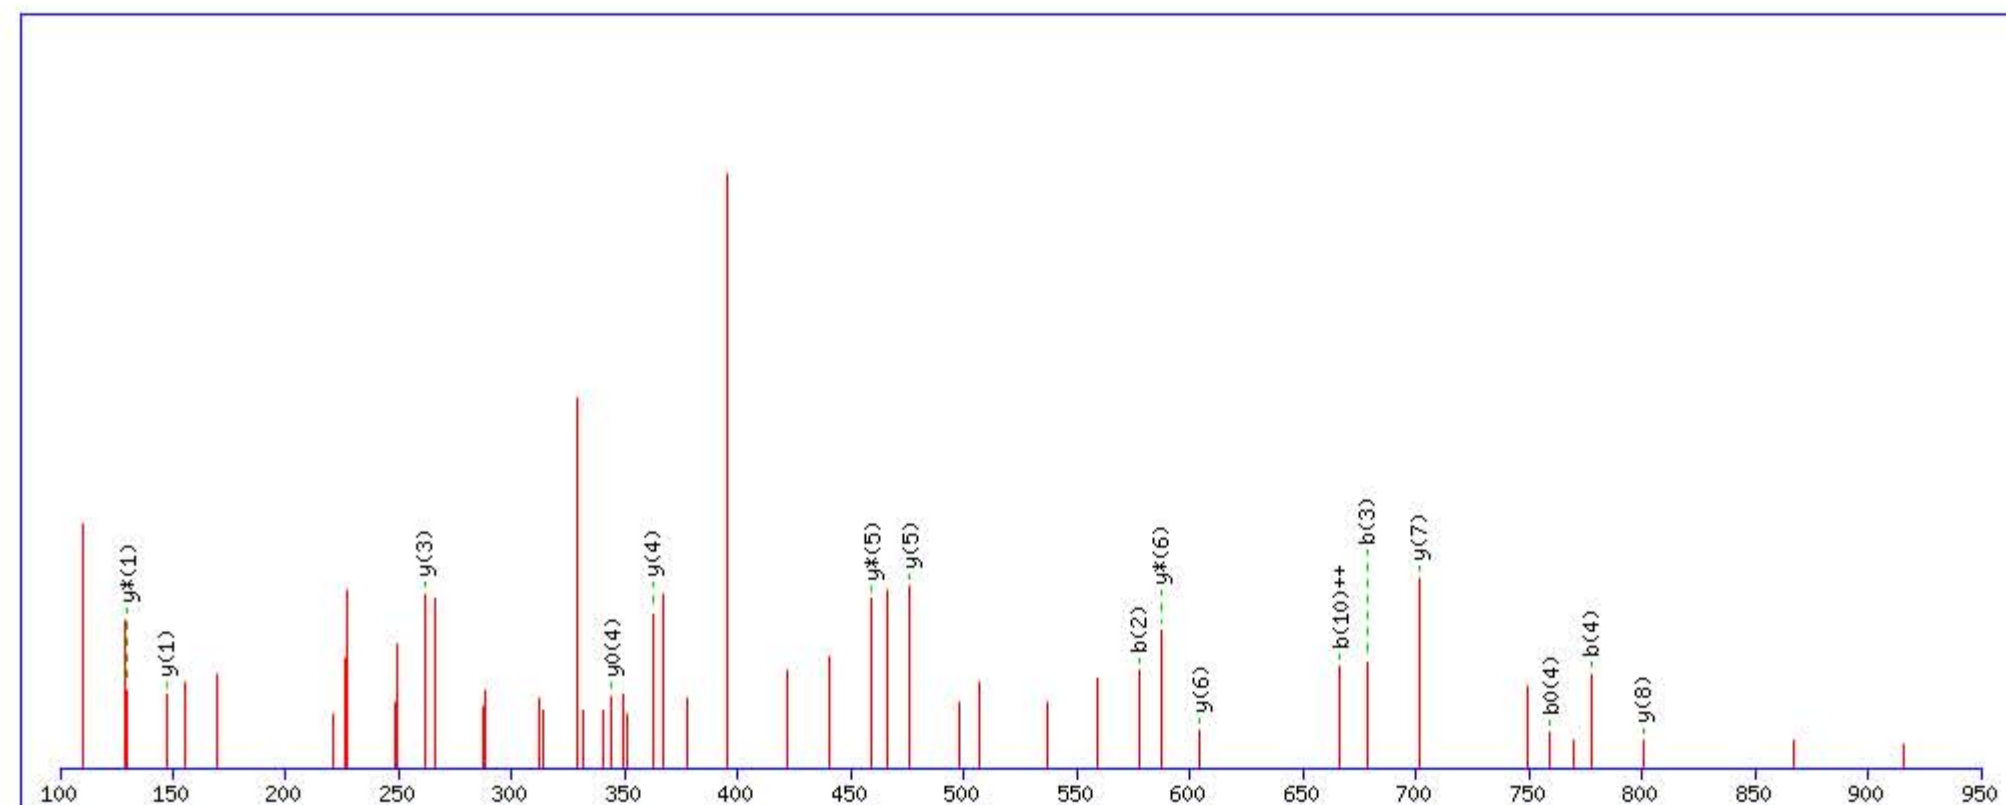

Monoisotopic mass of neutral peptide Mr(calc): 1476.750748

Fixed modifications: Carbamidomethyl (C) (apply to specified residues or termini only)

Variable modifications:

Q2 : Biotin:Thermo-21345 (Q)

Ions Score: 26 Expect: 0.0089

Matches : 16/108 fragment ions using 39 most intense peaks [\(help\)](#)

| #  | b                 | b <sup>++</sup>   | b <sup>*</sup> | b <sup>*++</sup> | b <sup>0</sup>    | b <sup>0++</sup> | Seq. | y                 | y <sup>++</sup> | y <sup>*</sup>    | y <sup>*++</sup> | y <sup>0</sup>    | y <sup>0++</sup> | #  |
|----|-------------------|-------------------|----------------|------------------|-------------------|------------------|------|-------------------|-----------------|-------------------|------------------|-------------------|------------------|----|
| 1  | 138.066188        | 69.536732         |                |                  |                   |                  | H    |                   |                 |                   |                  |                   |                  | 11 |
| 2  | <b>577.291514</b> | 289.149395        | 560.264965     | 280.636121       |                   |                  | Q    | 1340.699099       | 670.853187      | 1323.672550       | 662.339913       | 1322.688534       | 661.847905       | 10 |
| 3  | <b>678.339193</b> | 339.673235        | 661.312644     | 331.159960       | 660.328628        | 330.667952       | T    | 901.473773        | 451.240524      | 884.447224        | 442.727250       | 883.463208        | 442.235242       | 9  |
| 4  | <b>777.407607</b> | 389.207442        | 760.381058     | 380.694167       | <b>759.397042</b> | 380.202159       | V    | <b>800.426094</b> | 400.716685      | 783.399545        | 392.203410       | 782.415529        | 391.711402       | 8  |
| 5  | 874.460371        | 437.733824        | 857.433822     | 429.220549       | 856.449806        | 428.728541       | P    | <b>701.357680</b> | 351.182478      | 684.331131        | 342.669203       | 683.347115        | 342.177195       | 7  |
| 6  | 1002.518949       | 501.763113        | 985.492400     | 493.249838       | 984.508384        | 492.757830       | Q    | <b>604.304916</b> | 302.656096      | <b>587.278367</b> | 294.142821       | 586.294351        | 293.650813       | 6  |
| 7  | 1116.561876       | 558.784576        | 1099.535327    | 550.271302       | 1098.551311       | 549.779293       | N    | <b>476.246338</b> | 238.626807      | <b>459.219789</b> | 230.113532       | 458.235773        | 229.621524       | 5  |
| 8  | 1217.609555       | 609.308416        | 1200.583006    | 600.795141       | 1199.598990       | 600.303133       | T    | <b>362.203411</b> | 181.605343      | 345.176862        | 173.092069       | <b>344.192846</b> | 172.600061       | 4  |
| 9  | 1274.631019       | 637.819147        | 1257.604470    | 629.305873       | 1256.620454       | 628.813865       | G    | <b>261.155732</b> | 131.081504      | 244.129183        | 122.568229       |                   |                  | 3  |
| 10 | 1331.652483       | <b>666.329879</b> | 1314.625934    | 657.816605       | 1313.641918       | 657.324597       | G    | 204.134268        | 102.570772      | 187.107719        | 94.057497        |                   |                  | 2  |
| 11 |                   |                   |                |                  |                   |                  | K    | <b>147.112804</b> | 74.060040       | <b>130.086255</b> | 65.546765        |                   |                  | 1  |

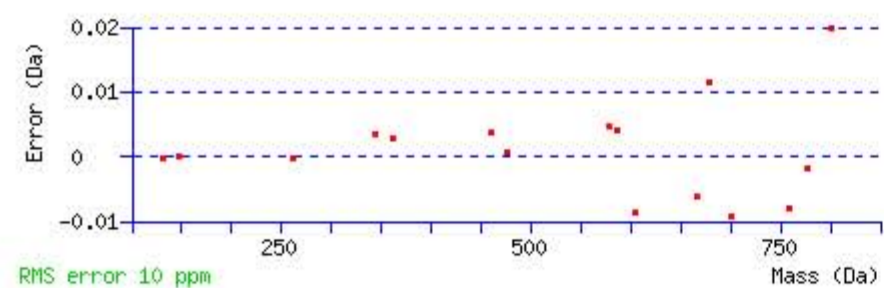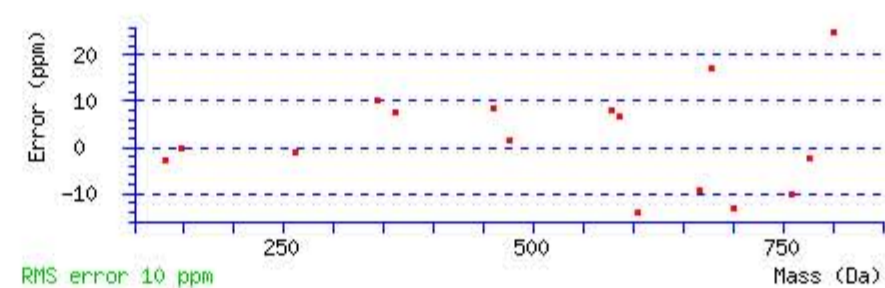

NCBI BLAST search of [HQTVPQNTGGK](#)

(Parameters: blastp, nr protein database, expect=20000, no filter, PAM30)

Other BLAST [web gateways](#)

All matches to this query

| Score | Mr(calc):   | Delta     | Sequence                      |
|-------|-------------|-----------|-------------------------------|
| 26.5  | 1476.750748 | -0.003136 | <a href="#">HQTVPQNTGGK</a>   |
| 16.3  | 1476.750748 | -0.003136 | <a href="#">HQTVPQNTGGK</a>   |
| 4.6   | 1476.736115 | 0.011497  | <a href="#">HQEALIGQSFYQK</a> |

# MASCOT SEARCH RESULTS

## Peptide View

MS/MS Fragmentation of **HQTVPQNTGGK**

Found in **TRFE\_HUMAN**, Serotransferrin OS=Homo sapiens GN=TF PE=1 SV=3

Match to Query 26564: 1476.748692 from(493.256840,3+) rtinseconds(1222) index(56607)

Title: Locus:1.1.1.1337.3 File:"2013-07-02 CLN FXIII 180 min 3rd FT.wiff"

Data file C:\Program Files (x86)\Matrix Science\Mascot Daemon\mgf\9 FXIII 180 min 3rd\mascot\_daemon\_merge.mgf

Click mouse within plot area to zoom in by factor of two about that point

Or, Plot from  to  Da

Label all possible matches  Label matches used for scoring

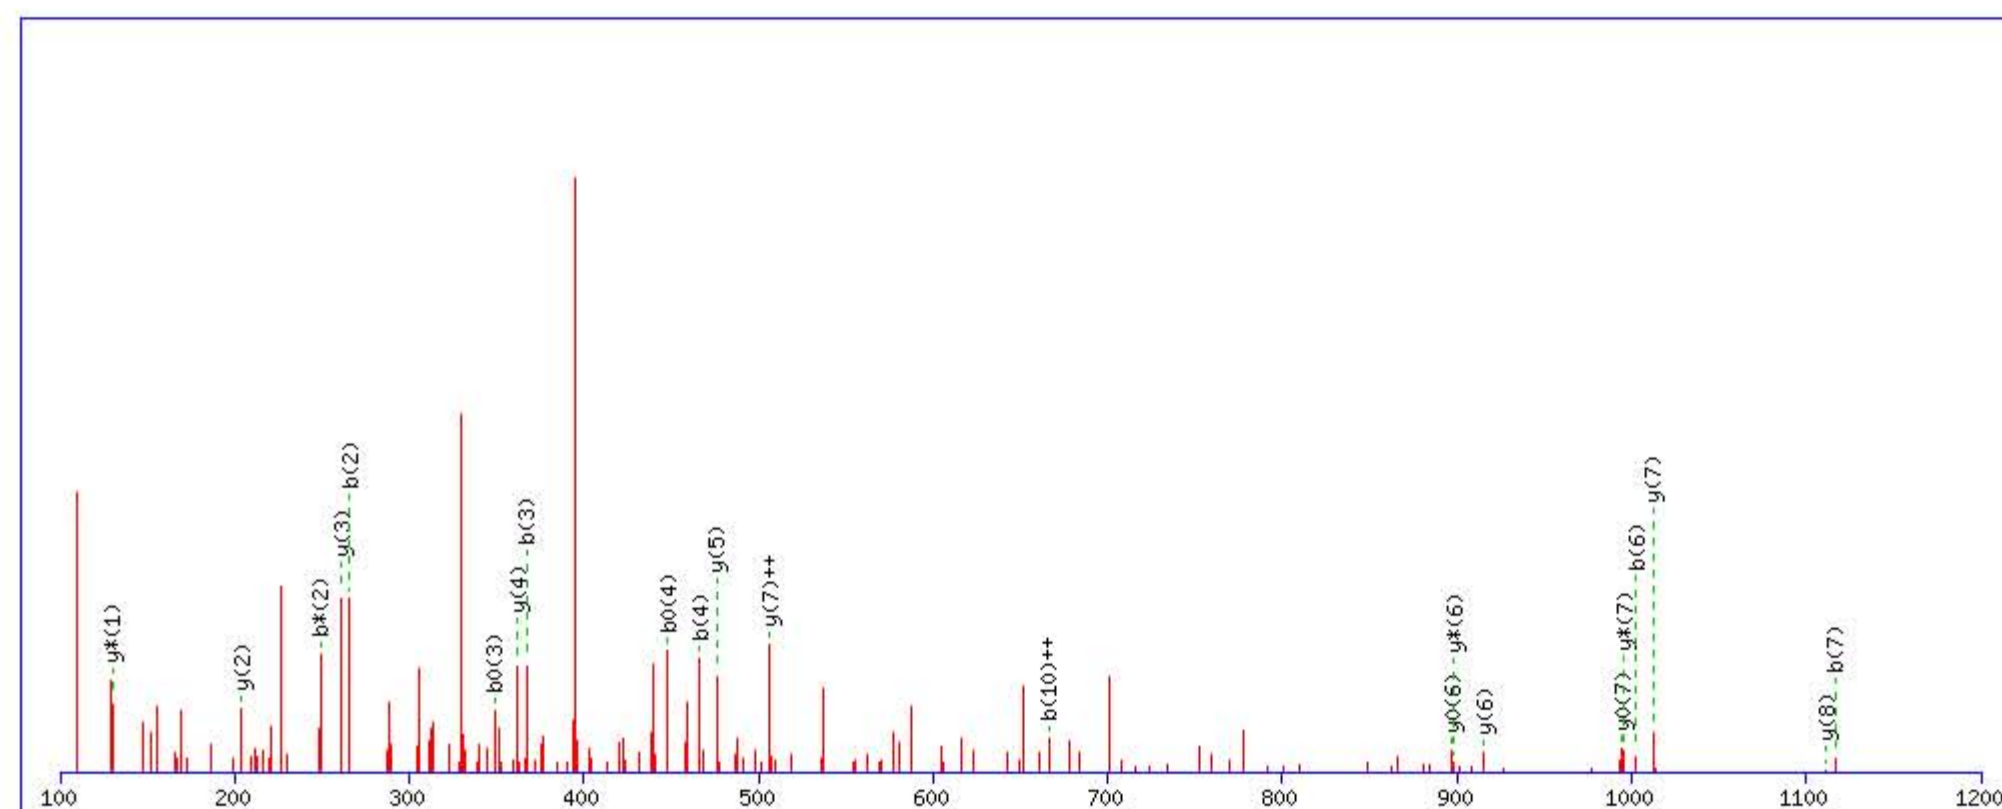

Monoisotopic mass of neutral peptide Mr(calc): 1476.750748

Fixed modifications: Carbamidomethyl (C) (apply to specified residues or termini only)

Variable modifications:

Q6 : Biotin:Thermo-21345 (Q)

Ions Score: 25 Expect: 0.015

Matches : 22/108 fragment ions using 49 most intense peaks [\(help\)](#)

| #  | b                  | b <sup>++</sup>   | b <sup>*</sup>    | b <sup>*++</sup> | b <sup>0</sup>    | b <sup>0++</sup> | Seq. | y                  | y <sup>++</sup>   | y <sup>*</sup>    | y <sup>*++</sup> | y <sup>0</sup>    | y <sup>0++</sup> | #  |
|----|--------------------|-------------------|-------------------|------------------|-------------------|------------------|------|--------------------|-------------------|-------------------|------------------|-------------------|------------------|----|
| 1  | 138.066188         | 69.536732         |                   |                  |                   |                  | H    |                    |                   |                   |                  |                   |                  | 11 |
| 2  | <b>266.124766</b>  | 133.566021        | <b>249.098217</b> | 125.052746       |                   |                  | Q    | 1340.699099        | 670.853187        | 1323.672550       | 662.339913       | 1322.688534       | 661.847905       | 10 |
| 3  | <b>367.172445</b>  | 184.089860        | 350.145896        | 175.576586       | <b>349.161880</b> | 175.084578       | T    | 1212.640521        | 606.823899        | 1195.613972       | 598.310624       | 1194.629956       | 597.818616       | 9  |
| 4  | <b>466.240859</b>  | 233.624068        | 449.214310        | 225.110793       | <b>448.230294</b> | 224.618785       | V    | <b>1111.592842</b> | 556.300059        | 1094.566293       | 547.786784       | 1093.582277       | 547.294776       | 8  |
| 5  | 563.293623         | 282.150450        | 546.267074        | 273.637175       | 545.283058        | 273.145167       | P    | <b>1012.524428</b> | <b>506.765852</b> | <b>995.497879</b> | 498.252577       | <b>994.513863</b> | 497.760569       | 7  |
| 6  | <b>1002.518949</b> | 501.763113        | 985.492400        | 493.249838       | 984.508384        | 492.757830       | Q    | <b>915.471664</b>  | 458.239470        | <b>898.445115</b> | 449.726195       | <b>897.461099</b> | 449.234187       | 6  |
| 7  | <b>1116.561876</b> | 558.784576        | 1099.535327       | 550.271302       | 1098.551311       | 549.779293       | N    | <b>476.246338</b>  | 238.626807        | 459.219789        | 230.113532       | 458.235773        | 229.621524       | 5  |
| 8  | 1217.609555        | 609.308416        | 1200.583006       | 600.795141       | 1199.598990       | 600.303133       | T    | <b>362.203411</b>  | 181.605343        | 345.176862        | 173.092069       | 344.192846        | 172.600061       | 4  |
| 9  | 1274.631019        | 637.819147        | 1257.604470       | 629.305873       | 1256.620454       | 628.813865       | G    | <b>261.155732</b>  | 131.081504        | 244.129183        | 122.568229       |                   |                  | 3  |
| 10 | 1331.652483        | <b>666.329879</b> | 1314.625934       | 657.816605       | 1313.641918       | 657.324597       | G    | <b>204.134268</b>  | 102.570772        | 187.107719        | 94.057497        |                   |                  | 2  |
| 11 |                    |                   |                   |                  |                   |                  | K    | 147.112804         | 74.060040         | <b>130.086255</b> | 65.546765        |                   |                  | 1  |

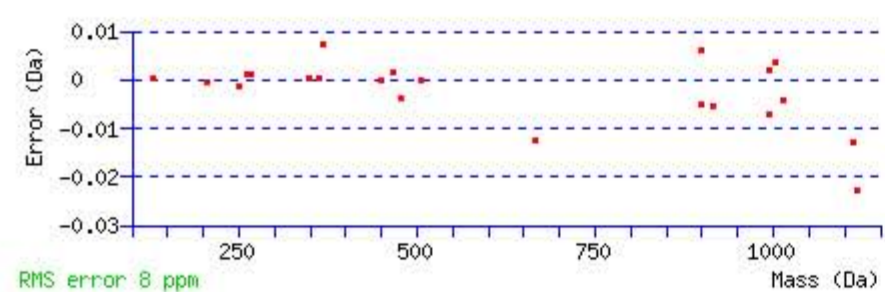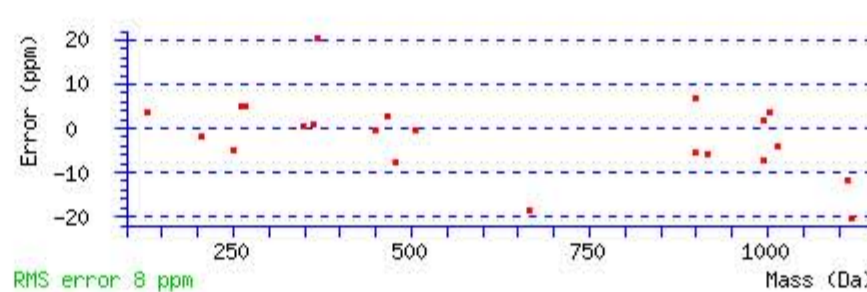

NCBI BLAST search of **HQTVPQNTGGK**

(Parameters: blastp, nr protein database, expect=20000, no filter, PAM30)

Other BLAST [web gateways](#)

All matches to this query

| Score | Mr(calc):   | Delta     | Sequence                       |
|-------|-------------|-----------|--------------------------------|
| 25.1  | 1476.750748 | -0.002056 | <a href="#">HQTVPQNTGGK</a>    |
| 24.2  | 1476.750748 | -0.002056 | <a href="#">HQTVPQNTGGK</a>    |
| 5.7   | 1476.736115 | 0.012577  | <a href="#">HQEALIGQSFY GK</a> |

Mascot: <http://www.matrixscience.com/>

# MASCOT SEARCH RESULTS

## Peptide View

MS/MS Fragmentation of **EFQLFSSPHGK**

Found in **TRFE\_HUMAN**, Serotransferrin OS=Homo sapiens GN=TF PE=1 SV=3

Match to Query 29990: 1586.792142 from(529.937990,3+) rtinseconds(2078) index(60999)

Title: Locus:1.1.1.1635.5 File:"2013-07-02 CLN FXIII 180 min 3rd FT.wiff"

Data file C:\Program Files (x86)\Matrix Science\Mascot Daemon\mgf9 FXIII 180 min 3rd\mascot\_daemon\_merge.mgf

Click mouse within plot area to zoom in by factor of two about that point

Or, Plot from  to  Da

Label all possible matches  Label matches used for scoring

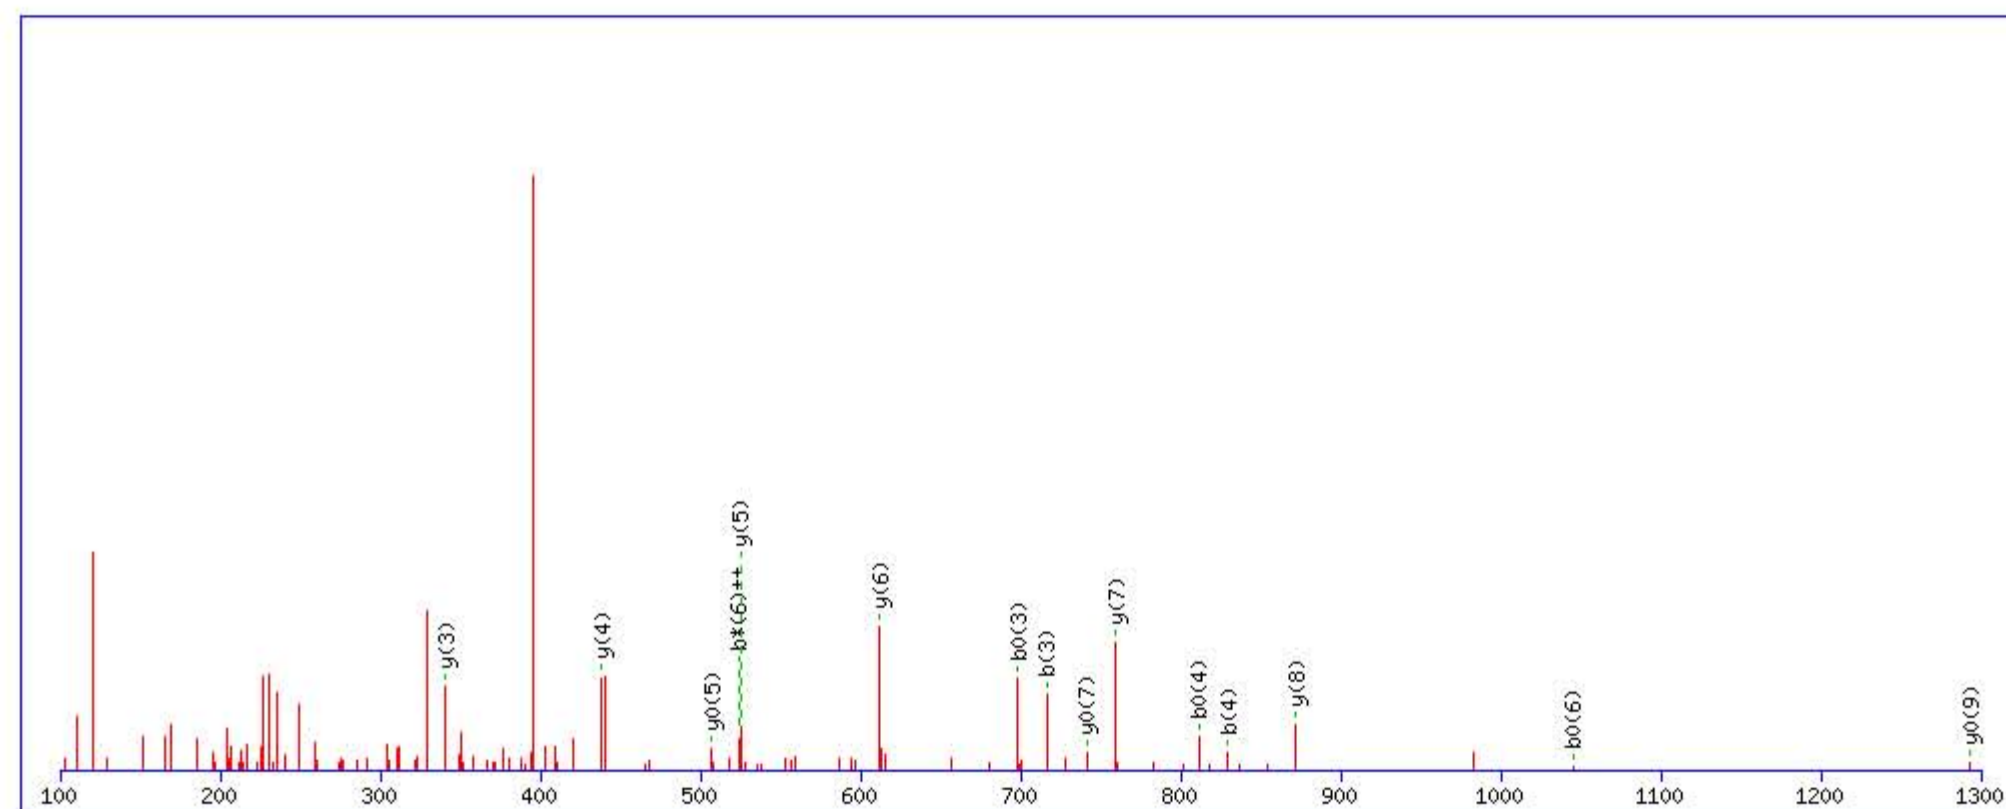

Monoisotopic mass of neutral peptide Mr(calc): 1586.791534

Fixed modifications: Carbamidomethyl (C) (apply to specified residues or termini only)

Variable modifications:

Q3 : Biotin:Thermo-21345 (Q)

Ions Score: 28 Expect: 0.0036

Matches : 15/108 fragment ions using 27 most intense peaks [\(help\)](#)

| #  | b                 | b <sup>++</sup> | b <sup>+</sup> | b <sup>+++</sup>  | b <sup>0</sup>     | b <sup>0++</sup> | Seq. | y                 | y <sup>++</sup> | y <sup>+</sup> | y <sup>+++</sup> | y <sup>0</sup>     | y <sup>0++</sup> | #  |
|----|-------------------|-----------------|----------------|-------------------|--------------------|------------------|------|-------------------|-----------------|----------------|------------------|--------------------|------------------|----|
| 1  | 130.049869        | 65.528572       |                |                   | 112.039304         | 56.523290        | E    |                   |                 |                |                  |                    |                  | 11 |
| 2  | 277.118283        | 139.062779      |                |                   | 259.107718         | 130.057497       | F    | 1458.756218       | 729.881747      | 1441.729669    | 721.368473       | 1440.745653        | 720.876465       | 10 |
| 3  | <b>716.343609</b> | 358.675443      | 699.317060     | 350.162168        | <b>698.333044</b>  | 349.670160       | Q    | 1311.687804       | 656.347540      | 1294.661255    | 647.834266       | <b>1293.677239</b> | 647.342258       | 9  |
| 4  | <b>829.427673</b> | 415.217475      | 812.401124     | 406.704200        | <b>811.417108</b>  | 406.212192       | L    | <b>872.462478</b> | 436.734877      | 855.435929     | 428.221603       | 854.451913         | 427.729595       | 8  |
| 5  | 976.496087        | 488.751682      | 959.469538     | 480.238407        | 958.485522         | 479.746399       | F    | <b>759.378414</b> | 380.192845      | 742.351865     | 371.679571       | <b>741.367849</b>  | 371.187563       | 7  |
| 6  | 1063.528115       | 532.267696      | 1046.501566    | <b>523.754421</b> | <b>1045.517550</b> | 523.262413       | S    | <b>612.310000</b> | 306.658638      | 595.283451     | 298.145364       | 594.299435         | 297.653356       | 6  |
| 7  | 1150.560143       | 575.783710      | 1133.533594    | 567.270435        | 1132.549578        | 566.778427       | S    | <b>525.277972</b> | 263.142624      | 508.251423     | 254.629350       | <b>507.267407</b>  | 254.137342       | 5  |
| 8  | 1247.612907       | 624.310092      | 1230.586358    | 615.796817        | 1229.602342        | 615.304809       | P    | <b>438.245944</b> | 219.626610      | 421.219395     | 211.113335       |                    |                  | 4  |
| 9  | 1384.671819       | 692.839548      | 1367.645270    | 684.326273        | 1366.661254        | 683.834265       | H    | <b>341.193180</b> | 171.100228      | 324.166631     | 162.586953       |                    |                  | 3  |
| 10 | 1441.693283       | 721.350280      | 1424.666734    | 712.837005        | 1423.682718        | 712.344997       | G    | 204.134268        | 102.570772      | 187.107719     | 94.057497        |                    |                  | 2  |
| 11 |                   |                 |                |                   |                    |                  | K    | 147.112804        | 74.060040       | 130.086255     | 65.546765        |                    |                  | 1  |

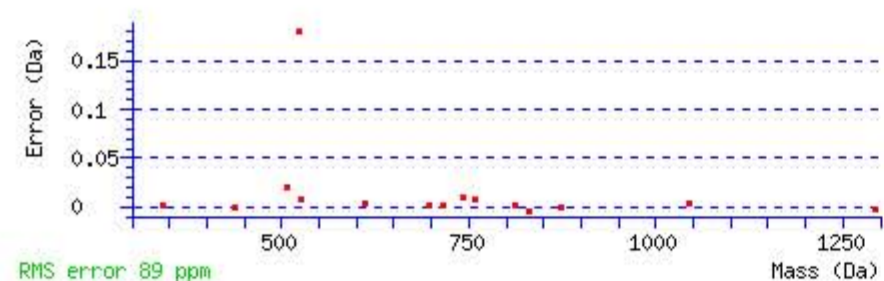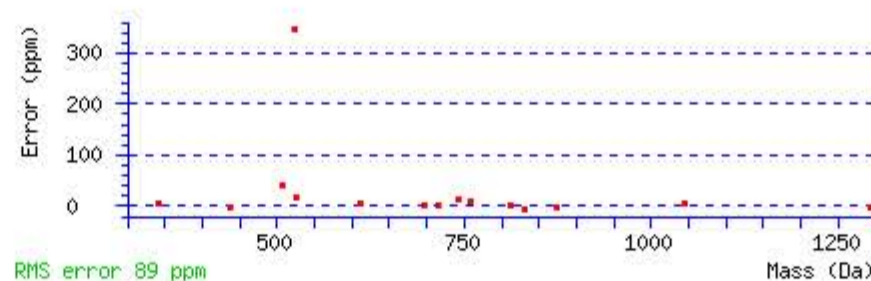

NCBI BLAST search of **EFQLFSSPHGK**

(Parameters: blastp, nr protein database, expect=20000, no filter, PAM30)

Other BLAST [web gateways](#)

All matches to this query

| Score | Mr(calc):   | Delta     | Sequence                     |
|-------|-------------|-----------|------------------------------|
| 28.0  | 1586.791534 | 0.000608  | <a href="#">EFQLFSSPHGK</a>  |
| 1.9   | 1586.813980 | -0.021838 | <a href="#">FTQNHMLIYHKR</a> |

Mascot: <http://www.matrixscience.com/>

# MASCOT Search Results

## Peptide View

MS/MS Fragmentation of **KDSGFQMNQLR**

Found in **TRFE\_HUMAN**, Serotransferrin OS=Homo sapiens GN=TF PE=1 SV=3

Match to Query 32303: 1633.801062 from(545.607630,3+) rtinseconds(1868) index(59720)

Title: Locus:1.1.1.1562.9 File:"2013-07-02 CLN FXIII 180 min 3rd FT.wiff"

Data file C:\Program Files (x86)\Matrix Science\Mascot Daemon\mgf9 FXIII 180 min 3rd\mascot\_daemon\_merge.mgf

Click mouse within plot area to zoom in by factor of two about that point

Or, Plot from  to  Da

Label all possible matches  Label matches used for scoring

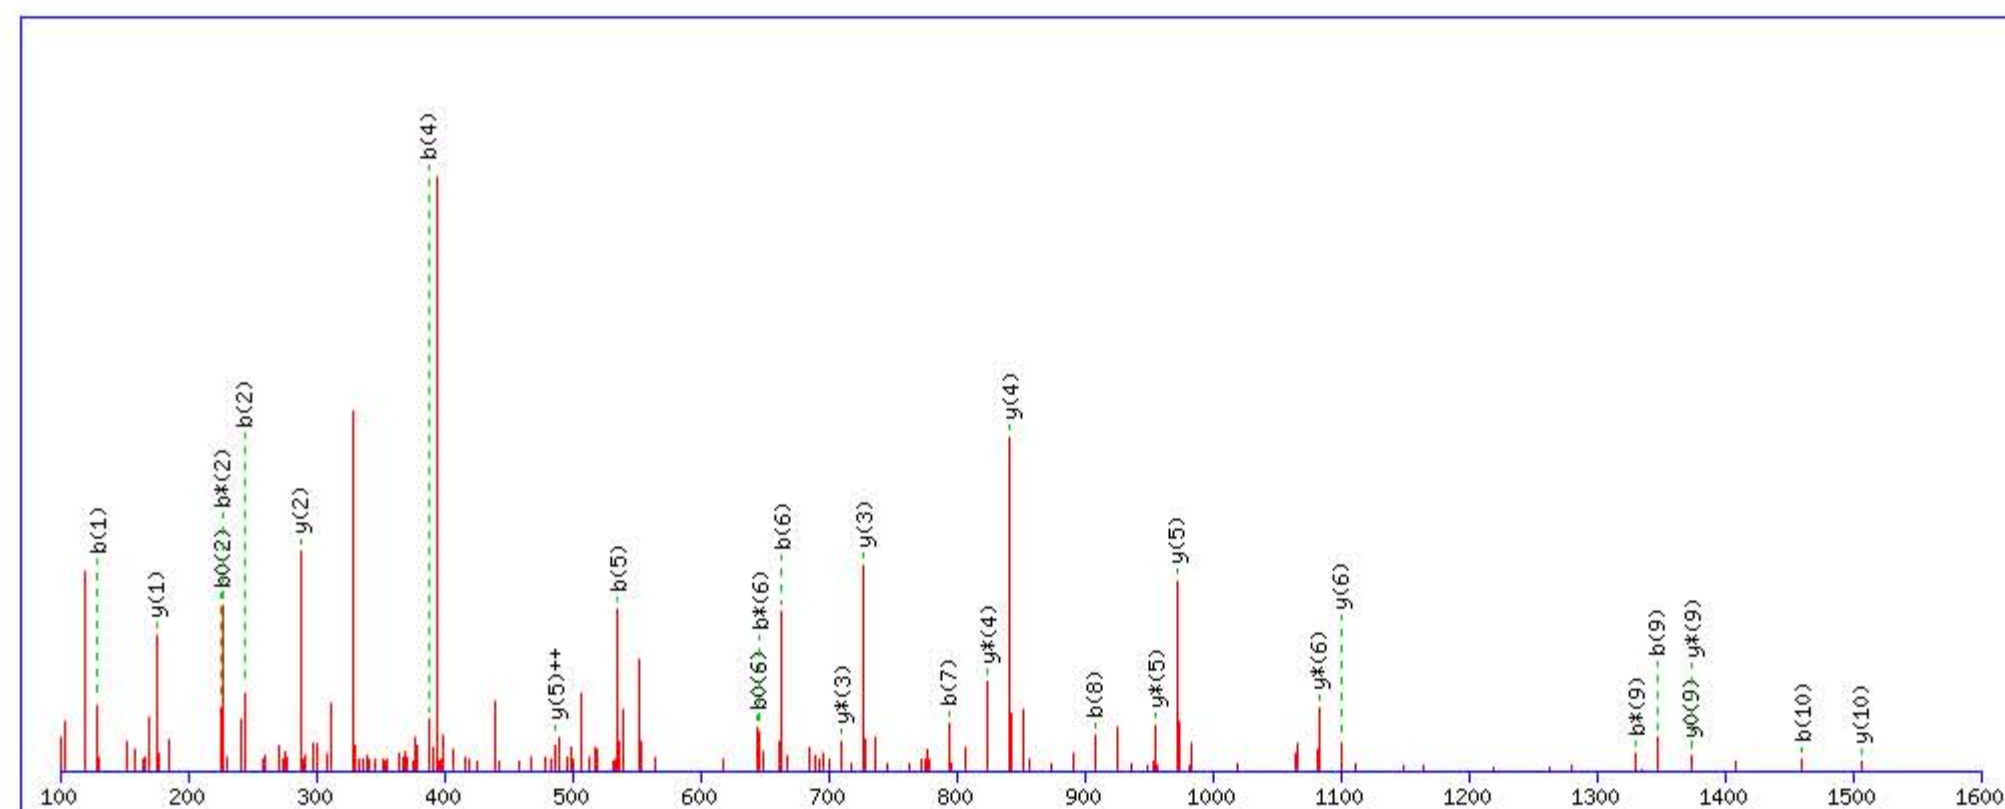

Monoisotopic mass of neutral peptide Mr(calc): 1633.806854

Fixed modifications: Carbamidomethyl (C) (apply to specified residues or termini only)

Variable modifications:

Q9 : Biotin:Thermo-21345 (Q)

Ions Score: 38 Expect: 0.001

Matches : 28/102 fragment ions using 65 most intense peaks [\(help\)](#)

| #  | b                  | b <sup>++</sup> | b <sup>*</sup>     | b <sup>*++</sup> | b <sup>0</sup>    | b <sup>0++</sup> | Seq.     | y                  | y <sup>++</sup>   | y <sup>*</sup>     | y <sup>*++</sup> | y <sup>0</sup>     | y <sup>0++</sup> | #  |
|----|--------------------|-----------------|--------------------|------------------|-------------------|------------------|----------|--------------------|-------------------|--------------------|------------------|--------------------|------------------|----|
| 1  | <b>129.102239</b>  | 65.054757       | 112.075690         | 56.541483        |                   |                  | <b>K</b> |                    |                   |                    |                  |                    |                  | 11 |
| 2  | <b>244.129182</b>  | 122.568229      | <b>227.102633</b>  | 114.054955       | <b>226.118617</b> | 113.562947       | <b>D</b> | <b>1506.719181</b> | 753.863228        | 1489.692632        | 745.349954       | 1488.708616        | 744.857946       | 10 |
| 3  | 331.161210         | 166.084243      | 314.134661         | 157.570969       | 313.150645        | 157.078961       | <b>S</b> | 1391.692238        | 696.349757        | <b>1374.665689</b> | 687.836482       | <b>1373.681673</b> | 687.344474       | 9  |
| 4  | <b>388.182674</b>  | 194.594975      | 371.156125         | 186.081701       | 370.172109        | 185.589693       | <b>G</b> | 1304.660210        | 652.833743        | 1287.633661        | 644.320468       |                    |                  | 8  |
| 5  | <b>535.251088</b>  | 268.129182      | 518.224539         | 259.615908       | 517.240523        | 259.123900       | <b>F</b> | 1247.638746        | 624.323011        | 1230.612197        | 615.809736       |                    |                  | 7  |
| 6  | <b>663.309666</b>  | 332.158471      | <b>646.283117</b>  | 323.645197       | <b>645.299101</b> | 323.153189       | <b>Q</b> | <b>1100.570332</b> | 550.788804        | <b>1083.543783</b> | 542.275530       |                    |                  | 6  |
| 7  | <b>794.350151</b>  | 397.678714      | 777.323602         | 389.165439       | 776.339586        | 388.673431       | <b>M</b> | <b>972.511754</b>  | <b>486.759515</b> | <b>955.485205</b>  | 478.246240       |                    |                  | 5  |
| 8  | <b>908.393078</b>  | 454.700177      | 891.366529         | 446.186903       | 890.382513        | 445.694895       | <b>N</b> | <b>841.471269</b>  | 421.239272        | <b>824.444720</b>  | 412.725998       |                    |                  | 4  |
| 9  | <b>1347.618404</b> | 674.312840      | <b>1330.591855</b> | 665.799566       | 1329.607839       | 665.307558       | <b>Q</b> | <b>727.428342</b>  | 364.217809        | <b>710.401793</b>  | 355.704534       |                    |                  | 3  |
| 10 | <b>1460.702468</b> | 730.854872      | 1443.675919        | 722.341598       | 1442.691903       | 721.849589       | <b>L</b> | <b>288.203016</b>  | 144.605146        | 271.176467         | 136.091871       |                    |                  | 2  |
| 11 |                    |                 |                    |                  |                   |                  | <b>R</b> | <b>175.118952</b>  | 88.063114         | 158.092403         | 79.549839        |                    |                  | 1  |

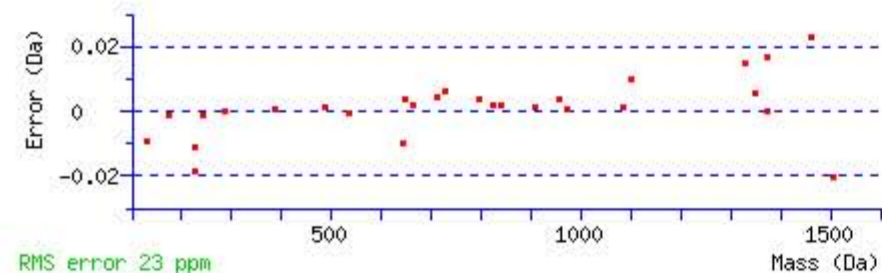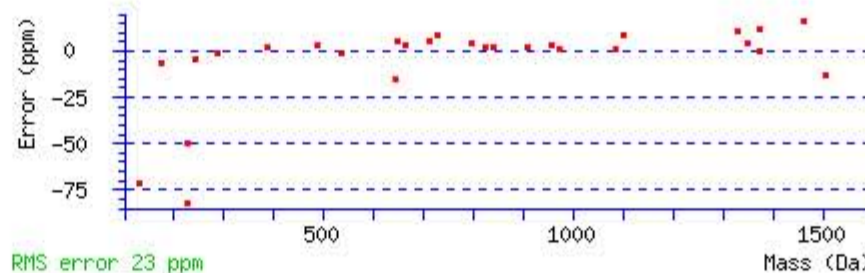

NCBI BLAST search of **KDSGFQMNQLR**

(Parameters: blastp, nr protein database, expect=20000, no filter, PAM30)

Other BLAST [web gateways](#)

All matches to this query

| Score | Mr(calc):   | Delta     | Sequence                         |
|-------|-------------|-----------|----------------------------------|
| 38.0  | 1633.806854 | -0.005792 | <a href="#">KDSGFQMNQLR</a>      |
| 16.8  | 1633.806854 | -0.005792 | <a href="#">KDSGFQMNQLR</a>      |
| 5.7   | 1633.798096 | 0.002966  | <a href="#">QDQEKDNMIEKLK</a>    |
| 2.4   | 1633.824615 | -0.023553 | <a href="#">AGGAFLMAGQVAEQLR</a> |
| 2.3   | 1633.817184 | -0.016122 | <a href="#">HLHEGAKSASAEELR</a>  |
| 1.5   | 1633.809311 | -0.008249 | <a href="#">GLSEEERSEKAMLR</a>   |
| 1.5   | 1633.795609 | 0.005453  | <a href="#">KFMEDEQQLR</a>       |
| 1.2   | 1633.799454 | 0.001608  | <a href="#">DANSFKSRDQR</a>      |

# MASCOT Search Results

## Peptide View

MS/MS Fragmentation of **KDSGFQMNQLR**

Found in **TRFE\_HUMAN**, Serotransferrin OS=Homo sapiens GN=TF PE=1 SV=3

Match to Query 32313: 1633.812748 from(817.913650,2+) rtinseconds(1769) index(59302)

Title: Locus:1.1.1.1527.23 File:"2013-07-02 CLN FXIII 180 min 3rd FT.wiff"

Data file C:\Program Files (x86)\Matrix Science\Mascot Daemon\mgf9 FXIII 180 min 3rd\mascot\_daemon\_merge.mgf

Click mouse within plot area to zoom in by factor of two about that point

Or, Plot from  to  Da

Label all possible matches  Label matches used for scoring

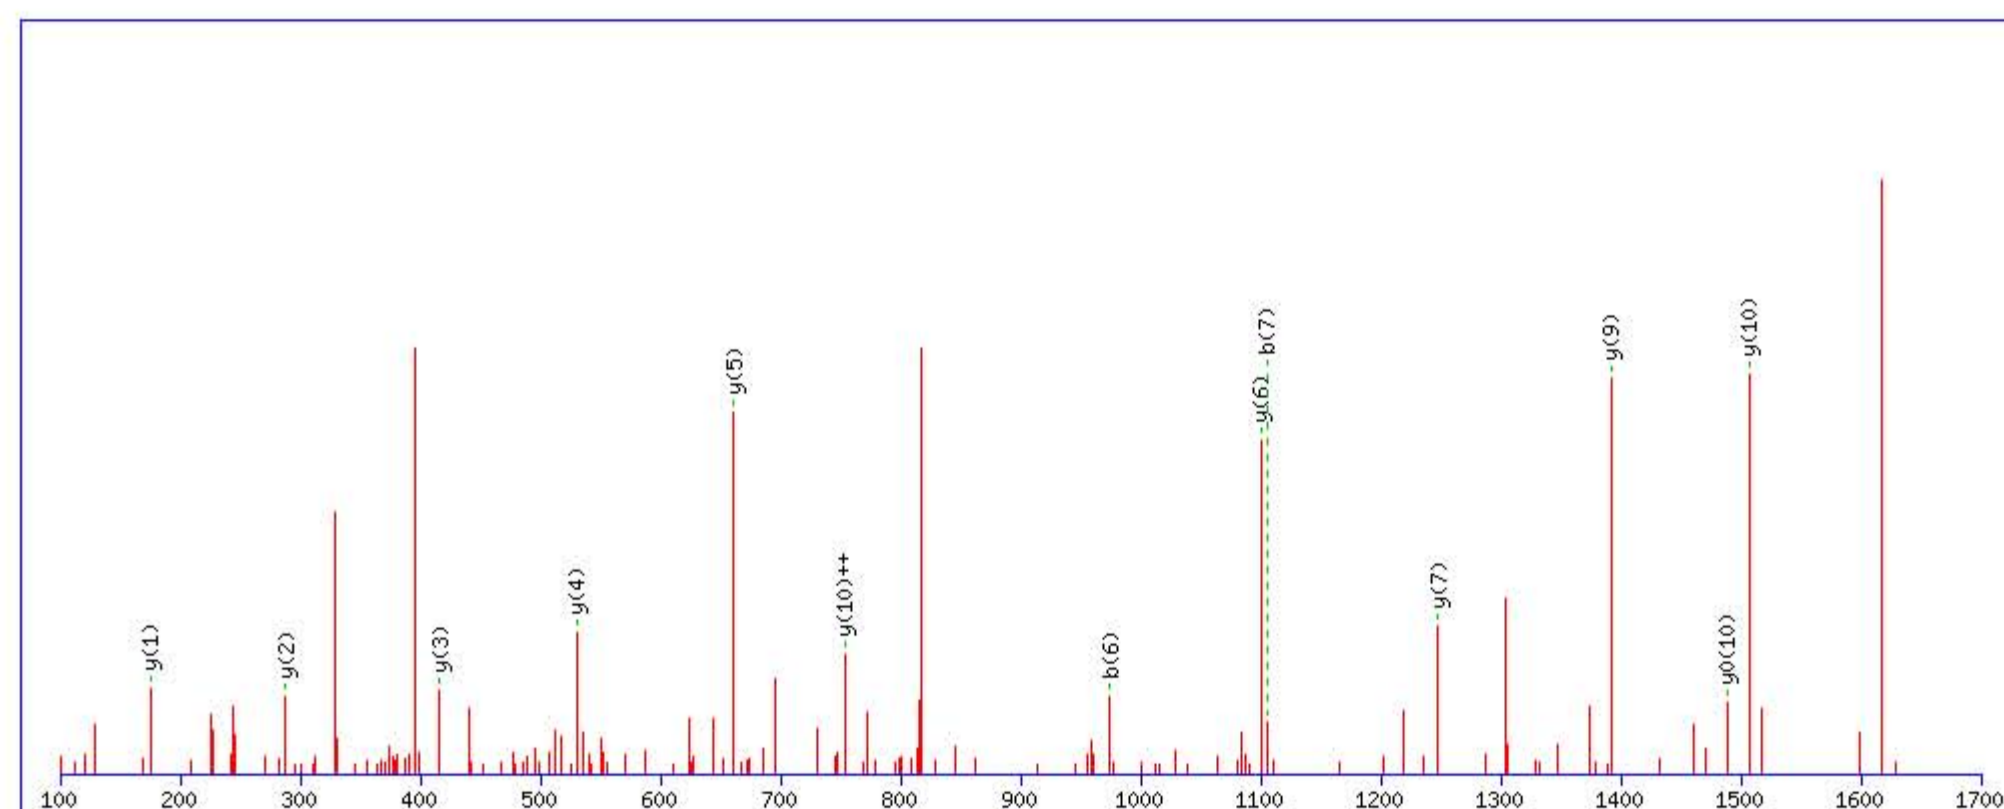

Monoisotopic mass of neutral peptide Mr(calc): 1633.806854

Fixed modifications: Carbamidomethyl (C) (apply to specified residues or termini only)

Variable modifications:

Q6 : Biotin:Thermo-21345 (Q)

Ions Score: 80 Expect: 2.2e-007

Matches : 13/102 fragment ions using 16 most intense peaks [\(help\)](#)

| #  | b           | b <sup>++</sup> | b <sup>*</sup> | b <sup>+++</sup> | b <sup>0</sup> | b <sup>0++</sup> | Seq. | y           | y <sup>++</sup> | y <sup>*</sup> | y <sup>+++</sup> | y <sup>0</sup> | y <sup>0++</sup> | #  |
|----|-------------|-----------------|----------------|------------------|----------------|------------------|------|-------------|-----------------|----------------|------------------|----------------|------------------|----|
| 1  | 129.102239  | 65.054757       | 112.075690     | 56.541483        |                |                  | K    |             |                 |                |                  |                |                  | 11 |
| 2  | 244.129182  | 122.568229      | 227.102633     | 114.054955       | 226.118617     | 113.562947       | D    | 1506.719181 | 753.863228      | 1489.692632    | 745.349954       | 1488.708616    | 744.857946       | 10 |
| 3  | 331.161210  | 166.084243      | 314.134661     | 157.570969       | 313.150645     | 157.078961       | S    | 1391.692238 | 696.349757      | 1374.665689    | 687.836482       | 1373.681673    | 687.344474       | 9  |
| 4  | 388.182674  | 194.594975      | 371.156125     | 186.081701       | 370.172109     | 185.589693       | G    | 1304.660210 | 652.833743      | 1287.633661    | 644.320468       |                |                  | 8  |
| 5  | 535.251088  | 268.129182      | 518.224539     | 259.615908       | 517.240523     | 259.123900       | F    | 1247.638746 | 624.323011      | 1230.612197    | 615.809736       |                |                  | 7  |
| 6  | 974.476414  | 487.741845      | 957.449865     | 479.228571       | 956.465849     | 478.736563       | Q    | 1100.570332 | 550.788804      | 1083.543783    | 542.275530       |                |                  | 6  |
| 7  | 1105.516899 | 553.262088      | 1088.490350    | 544.748813       | 1087.506334    | 544.256805       | M    | 661.345006  | 331.176141      | 644.318457     | 322.662866       |                |                  | 5  |
| 8  | 1219.559826 | 610.283551      | 1202.533277    | 601.770277       | 1201.549261    | 601.278268       | N    | 530.304521  | 265.655899      | 513.277972     | 257.142624       |                |                  | 4  |
| 9  | 1347.618404 | 674.312840      | 1330.591855    | 665.799566       | 1329.607839    | 665.307558       | Q    | 416.261594  | 208.634435      | 399.235045     | 200.121160       |                |                  | 3  |
| 10 | 1460.702468 | 730.854872      | 1443.675919    | 722.341598       | 1442.691903    | 721.849589       | L    | 288.203016  | 144.605146      | 271.176467     | 136.091871       |                |                  | 2  |
| 11 |             |                 |                |                  |                |                  | R    | 175.118952  | 88.063114       | 158.092403     | 79.549839        |                |                  | 1  |

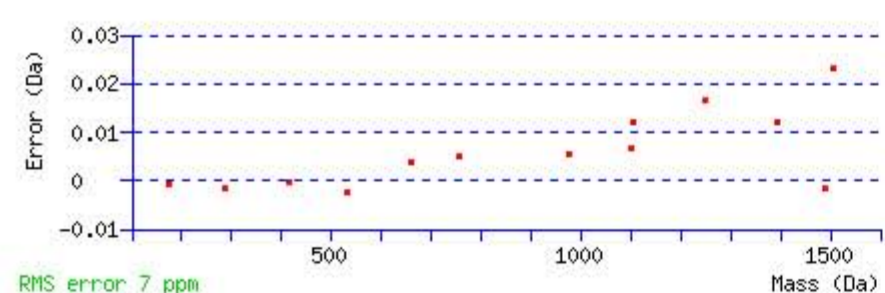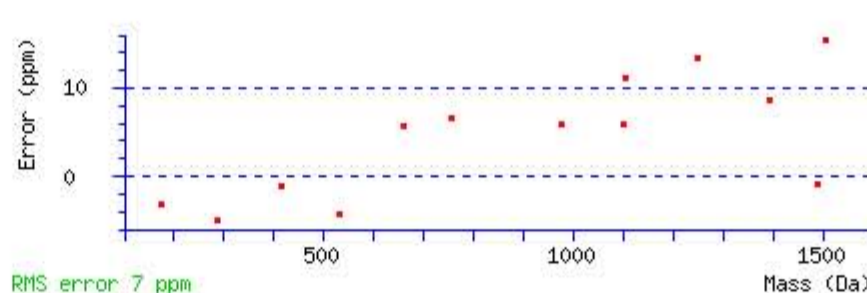

NCBI BLAST search of **KDSGFQMNQLR**

(Parameters: blastp, nr protein database, expect=20000, no filter, PAM30)

Other BLAST [web gateways](#)

All matches to this query

| Score | Mr(calc):   | Delta     | Sequence                         |
|-------|-------------|-----------|----------------------------------|
| 80.2  | 1633.806854 | 0.005894  | <a href="#">KDSGFQMNQLR</a>      |
| 32.6  | 1633.806854 | 0.005894  | <a href="#">KDSGFQMNQLR</a>      |
| 12.6  | 1633.824615 | -0.011867 | <a href="#">AGGAFLMAGQVAEQLR</a> |
| 10.6  | 1633.795609 | 0.017139  | <a href="#">KFMEDEQQLR</a>       |
| 7.2   | 1633.798096 | 0.014652  | <a href="#">QDQEKDNMIEKLK</a>    |
| 6.4   | 1633.832443 | -0.019695 | <a href="#">NRYINILAYDHSR</a>    |
| 6.3   | 1633.810669 | 0.002079  | <a href="#">AGLENMDRAAQRFR</a>   |
| 4.8   | 1633.805954 | 0.006794  | <a href="#">LFREENDINESIR</a>    |
| 4.7   | 1633.799454 | 0.013294  | <a href="#">GPDNSMGFGAERKIR</a>  |
| 4.6   | 1633.824585 | -0.011837 | <a href="#">EQAARFCAEIKSPK</a>   |

# MASCOT SCIENCE Mascot Search Results

## Peptide View

MS/MS Fragmentation of **HQTVPQNTGGK**

Found in **TRFE\_HUMAN**, Serotransferrin OS=Homo sapiens GN=TF PE=1 SV=3

Match to Query 35463: 1787.914152 from(596.978660,3+) rtinseconds(1613) index(58595)  
 Title: Locus:1.1.1.1473.10 File:"2013-07-02 CLN FXIII 180 min 3rd FT.wiff"

Data file C:\Program Files (x86)\Matrix Science\Mascot Daemon\mgf\9 FXIII 180 min 3rd\mascot\_daemon\_merge.mgf

Click mouse within plot area to zoom in by factor of two about that point

Or, Plot from  to  Da

Label all possible matches  Label matches used for scoring

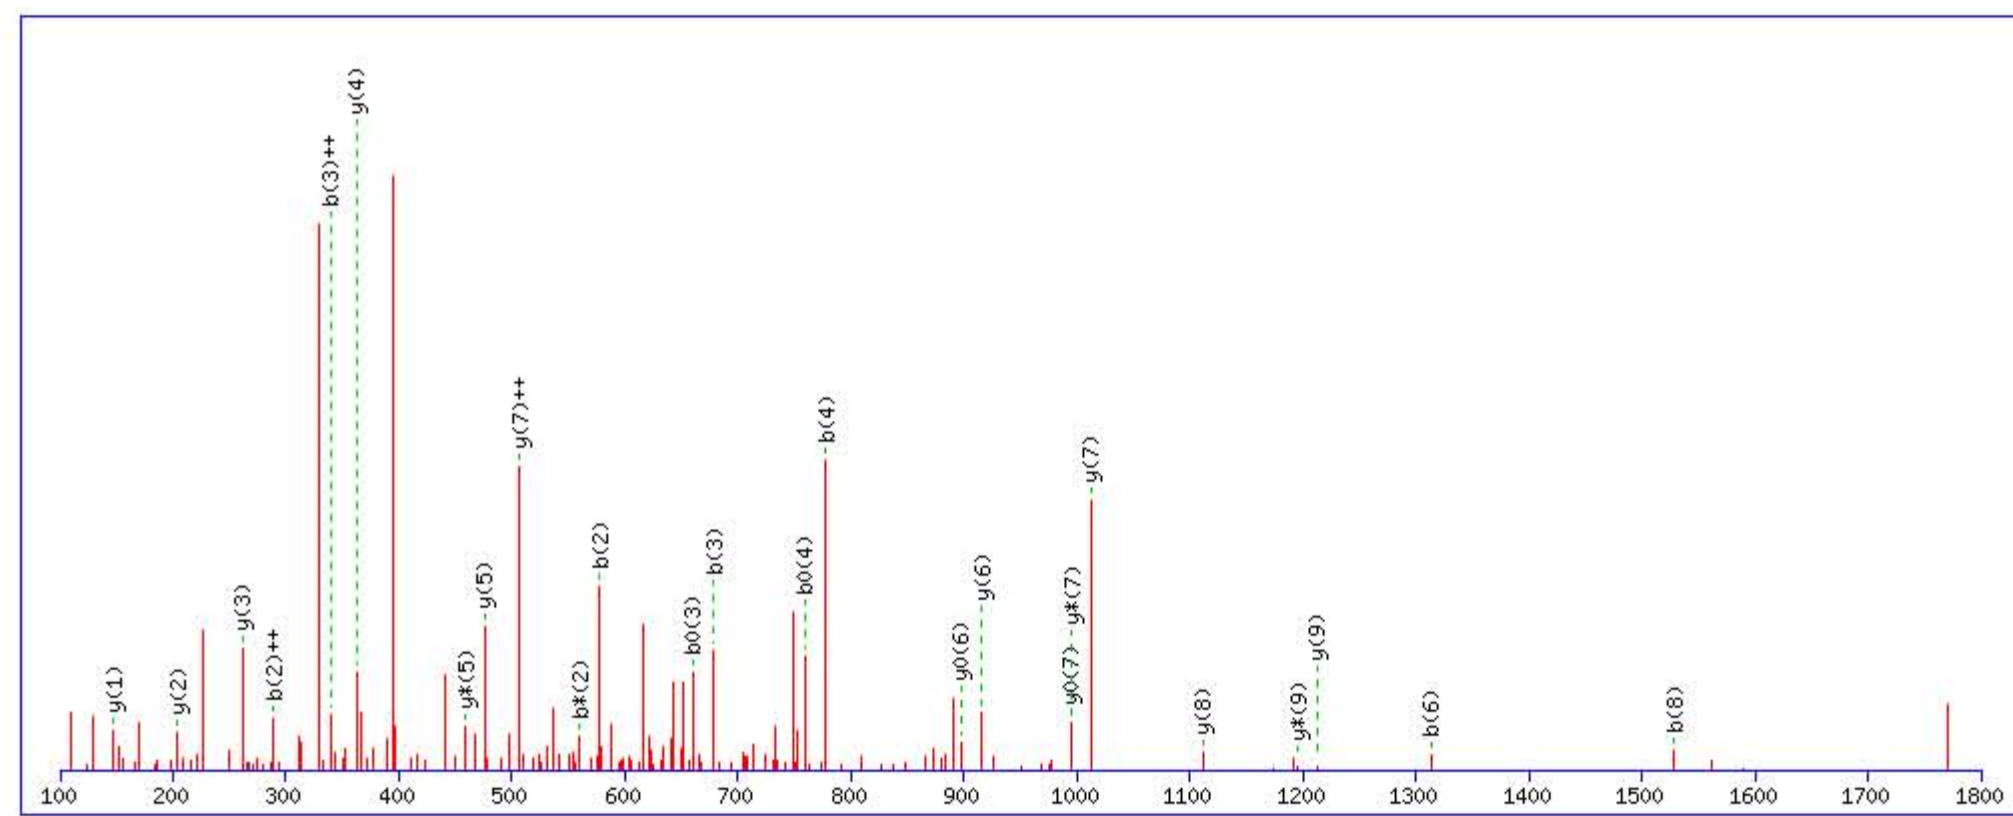

Monoisotopic mass of neutral peptide Mr(calc): 1787.917496  
 Fixed modifications: Carbamidomethyl (C) (apply to specified residues or termini only)  
 Variable modifications:  
 Q2 : Biotin:Thermo-21345 (Q)  
 Q6 : Biotin:Thermo-21345 (Q)  
 Ions Score: 37 Expect: 0.00059  
 Matches : 25/108 fragment ions using 59 most intense peaks [\(help\)](#)

| #  | b           | b <sup>++</sup> | b <sup>*</sup> | b <sup>*++</sup> | b <sup>0</sup> | b <sup>0++</sup> | Seq. | y           | y <sup>++</sup> | y <sup>*</sup> | y <sup>*++</sup> | y <sup>0</sup> | y <sup>0++</sup> | #  |
|----|-------------|-----------------|----------------|------------------|----------------|------------------|------|-------------|-----------------|----------------|------------------|----------------|------------------|----|
| 1  | 138.066188  | 69.536732       |                |                  |                |                  | H    |             |                 |                |                  |                |                  | 11 |
| 2  | 577.291514  | 289.149395      | 560.264965     | 280.636121       |                |                  | Q    | 1651.865847 | 826.436562      | 1634.839298    | 817.923287       | 1633.855282    | 817.431279       | 10 |
| 3  | 678.339193  | 339.673235      | 661.312644     | 331.159960       | 660.328628     | 330.667952       | T    | 1212.640521 | 606.823899      | 1195.613972    | 598.310624       | 1194.629956    | 597.818616       | 9  |
| 4  | 777.407607  | 389.207442      | 760.381058     | 380.694167       | 759.397042     | 380.202159       | V    | 1111.592842 | 556.300059      | 1094.566293    | 547.786785       | 1093.582277    | 547.294777       | 8  |
| 5  | 874.460371  | 437.733824      | 857.433822     | 429.220549       | 856.449806     | 428.728541       | P    | 1012.524428 | 506.765852      | 995.497879     | 498.252578       | 994.513863     | 497.760570       | 7  |
| 6  | 1313.685697 | 657.346487      | 1296.659148    | 648.833212       | 1295.675132    | 648.341204       | Q    | 915.471664  | 458.239470      | 898.445115     | 449.726196       | 897.461099     | 449.234188       | 6  |
| 7  | 1427.728624 | 714.367950      | 1410.702075    | 705.854676       | 1409.718059    | 705.362668       | N    | 476.246338  | 238.626807      | 459.219789     | 230.113532       | 458.235773     | 229.621524       | 5  |
| 8  | 1528.776303 | 764.891790      | 1511.749754    | 756.378515       | 1510.765738    | 755.886507       | T    | 362.203411  | 181.605343      | 345.176862     | 173.092069       | 344.192846     | 172.600061       | 4  |
| 9  | 1585.797767 | 793.402522      | 1568.771218    | 784.889247       | 1567.787202    | 784.397239       | G    | 261.155732  | 131.081504      | 244.129183     | 122.568229       |                |                  | 3  |
| 10 | 1642.819231 | 821.913254      | 1625.792682    | 813.399979       | 1624.808666    | 812.907971       | G    | 204.134268  | 102.570772      | 187.107719     | 94.057497        |                |                  | 2  |
| 11 |             |                 |                |                  |                |                  | K    | 147.112804  | 74.060040       | 130.086255     | 65.546765        |                |                  | 1  |

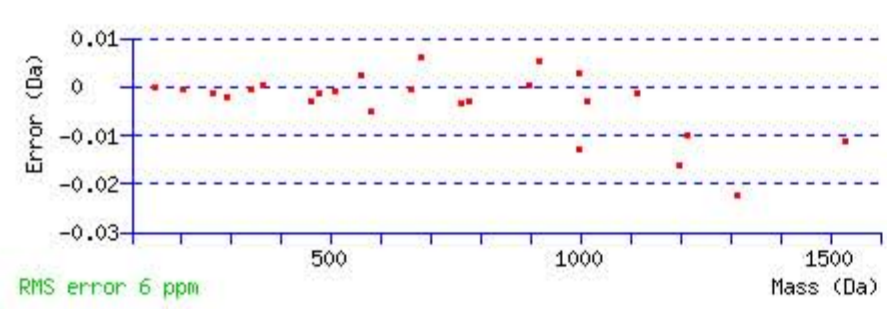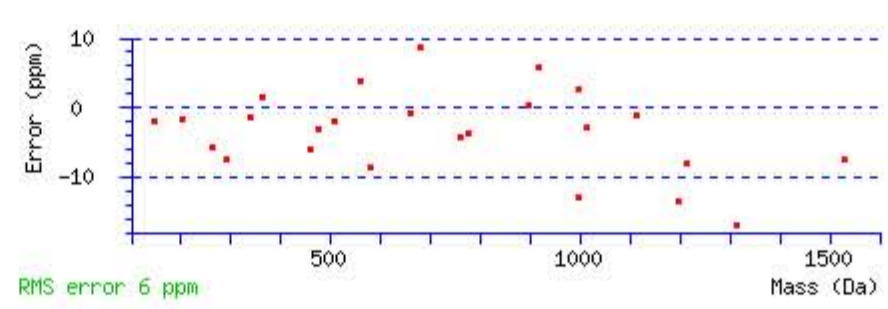

NCBI BLAST search of **HQTVPQNTGGK**  
 (Parameters: blastp, nr protein database, expect=20000, no filter, PAM30)  
 Other BLAST [web gateways](#)

### All matches to this query

| Score | Mr(calc):   | Delta     | Sequence                           |
|-------|-------------|-----------|------------------------------------|
| 36.5  | 1787.917496 | -0.003344 | <a href="#">HQTVPQNTGGK</a>        |
| 2.1   | 1787.923996 | -0.009844 | <a href="#">VPLQGFAALEGMNGIQK</a>  |
| 2.0   | 1787.935211 | -0.021059 | <a href="#">ARRAYGPGIEPTGNMVKK</a> |

# MASCOT SCIENCE Mascot Search Results

## Peptide View

MS/MS Fragmentation of **DQYELLCLDNTR**

Found in **TRFE\_HUMAN**, Serotransferrin OS=Homo sapiens GN=TF PE=1 SV=3

Match to Query 36618: 1849.884028 from(925.949290,2+) rtinseconds(2458) index(62960)

Title: Locus:1.1.1.1767.14 File:"2013-07-02 CLN FXIII 180 min 3rd FT.wiff"

Data file C:\Program Files (x86)\Matrix Science\Mascot Daemon\mgf\9 FXIII 180 min 3rd\mascot\_daemon\_merge.mgf

Click mouse within plot area to zoom in by factor of two about that point

Or, Plot from  to  Da

Label all possible matches  Label matches used for scoring

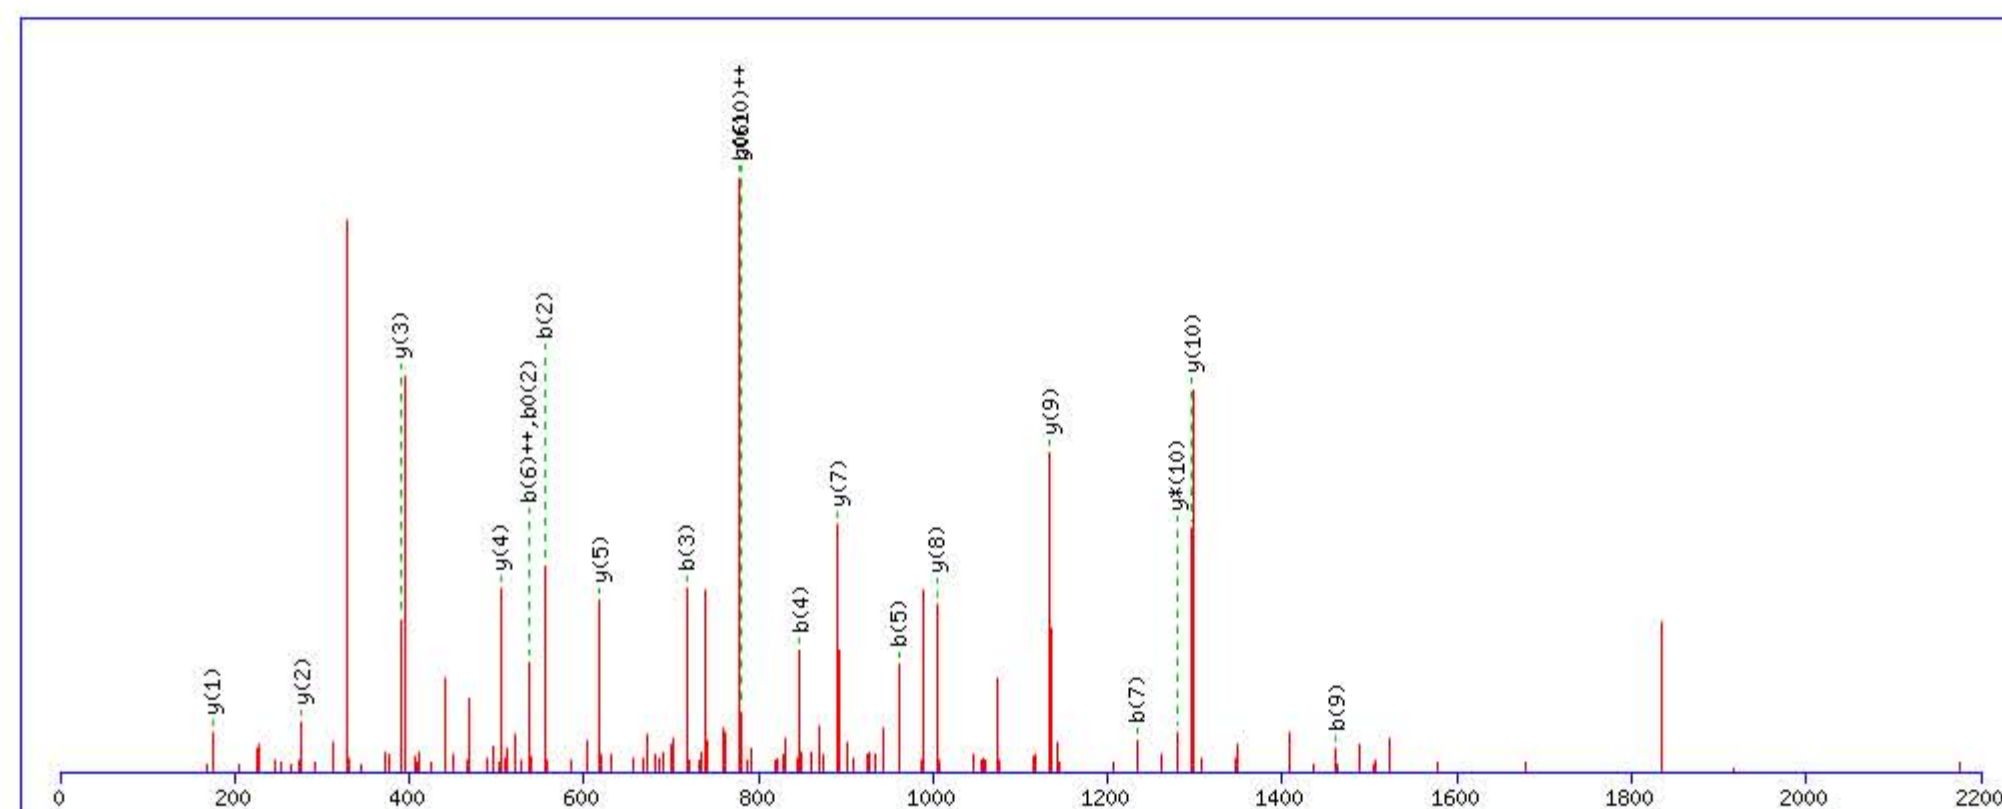

Monoisotopic mass of neutral peptide Mr(calc): 1849.870239

Fixed modifications: Carbamidomethyl (C) (apply to specified residues or termini only)

Variable modifications:

Q2 : Biotin:Thermo-21345 (Q)

Ions Score: 50 Expect: 3.4e-005

Matches : 20/128 fragment ions using 45 most intense peaks [\(help\)](#)

| #  | b                  | b <sup>++</sup>   | b <sup>*</sup> | b <sup>*++</sup> | b <sup>0</sup>    | b <sup>0++</sup>  | Seq. | y                  | y <sup>++</sup> | y <sup>*</sup>     | y <sup>*++</sup> | y <sup>0</sup> | y <sup>0++</sup> | #  |
|----|--------------------|-------------------|----------------|------------------|-------------------|-------------------|------|--------------------|-----------------|--------------------|------------------|----------------|------------------|----|
| 1  | 116.034219         | 58.520748         |                |                  | 98.023654         | 49.515465         | D    |                    |                 |                    |                  |                |                  | 12 |
| 2  | <b>555.259545</b>  | 278.133411        | 538.232996     | 269.620136       | <b>537.248980</b> | 269.128128        | Q    | 1735.850590        | 868.428933      | 1718.824041        | 859.915659       | 1717.840025    | 859.423651       | 11 |
| 3  | <b>718.322874</b>  | 359.665075        | 701.296325     | 351.151801       | 700.312309        | 350.659793        | Y    | <b>1296.625264</b> | 648.816270      | <b>1279.598715</b> | 640.302996       | 1278.614699    | 639.810988       | 10 |
| 4  | <b>847.365467</b>  | 424.186372        | 830.338918     | 415.673097       | 829.354902        | 415.181089        | E    | <b>1133.561935</b> | 567.284606      | 1116.535386        | 558.771331       | 1115.551370    | 558.279323       | 9  |
| 5  | <b>960.449531</b>  | 480.728404        | 943.422982     | 472.215129       | 942.438966        | 471.723121        | L    | <b>1004.519342</b> | 502.763309      | 987.492793         | 494.250034       | 986.508777     | 493.758026       | 8  |
| 6  | 1073.533595        | <b>537.270436</b> | 1056.507046    | 528.757161       | 1055.523030       | 528.265153        | L    | <b>891.435278</b>  | 446.221277      | 874.408729         | 437.708002       | 873.424713     | 437.215994       | 7  |
| 7  | <b>1233.564244</b> | 617.285760        | 1216.537695    | 608.772486       | 1215.553679       | 608.280478        | C    | <b>778.351214</b>  | 389.679245      | 761.324665         | 381.165971       | 760.340649     | 380.673963       | 6  |
| 8  | 1346.648308        | 673.827792        | 1329.621759    | 665.314518       | 1328.637743       | 664.822510        | L    | <b>618.320565</b>  | 309.663921      | 601.294016         | 301.150646       | 600.310000     | 300.658638       | 5  |
| 9  | <b>1461.675251</b> | 731.341264        | 1444.648702    | 722.827989       | 1443.664686       | 722.335981        | D    | <b>505.236501</b>  | 253.121888      | 488.209952         | 244.608614       | 487.225936     | 244.116606       | 4  |
| 10 | 1575.718178        | 788.362727        | 1558.691629    | 779.849453       | 1557.707613       | <b>779.357445</b> | N    | <b>390.209558</b>  | 195.608417      | 373.183009         | 187.095142       | 372.198993     | 186.603134       | 3  |
| 11 | 1676.765857        | 838.886567        | 1659.739308    | 830.373292       | 1658.755292       | 829.881284        | T    | <b>276.166631</b>  | 138.586953      | 259.140082         | 130.073679       | 258.156066     | 129.581671       | 2  |
| 12 |                    |                   |                |                  |                   |                   | R    | <b>175.118952</b>  | 88.063114       | 158.092403         | 79.549839        |                |                  | 1  |

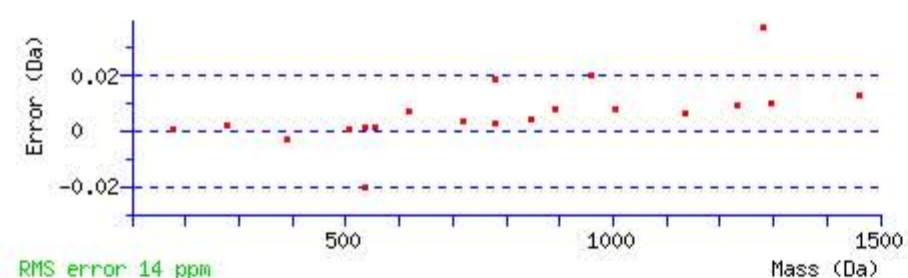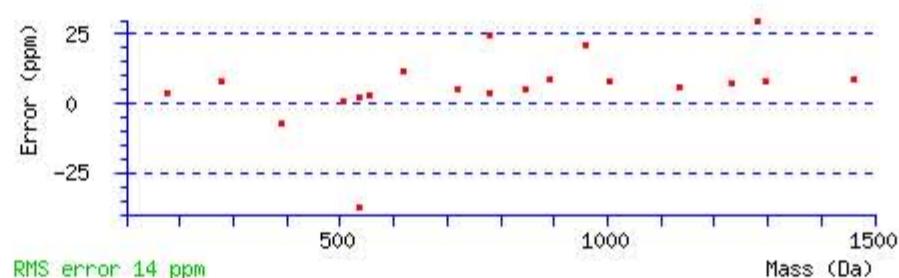

NCBI BLAST search of [DQYELLCLDNTR](#)

(Parameters: blastp, nr protein database, expect=20000, no filter, PAM30)

Other BLAST [web gateways](#)

All matches to this query

| Score | Mr(calc):   | Delta    | Sequence                       |
|-------|-------------|----------|--------------------------------|
| 50.4  | 1849.870239 | 0.013789 | <a href="#">DQYELLCLDNTR</a>   |
| 2.8   | 1849.858810 | 0.025218 | <a href="#">ISQETEQRCSLNTR</a> |

Mascot: <http://www.matrixscience.com/>

# MASCOT SCIENCE Mascot Search Results

## Peptide View

MS/MS Fragmentation of **EDPQTFYYAVAVVK**

Found in **TRFE\_HUMAN**, Serotransferrin OS=Homo sapiens GN=TF PE=1 SV=3

Match to Query 38169: 1939.984152 from(647.668660,3+) rtinseconds(2589) index(63757)

Title: Locus:1.1.1.1813.8 File:"2013-07-02 CLN FXIII 180 min 3rd FT.wiff"

Data file C:\Program Files (x86)\Matrix Science\Mascot Daemon\mgf\9 FXIII 180 min 3rd\mascot\_daemon\_merge.mgf

Click mouse within plot area to zoom in by factor of two about that point

Or, Plot from  to  Da

Label all possible matches  Label matches used for scoring

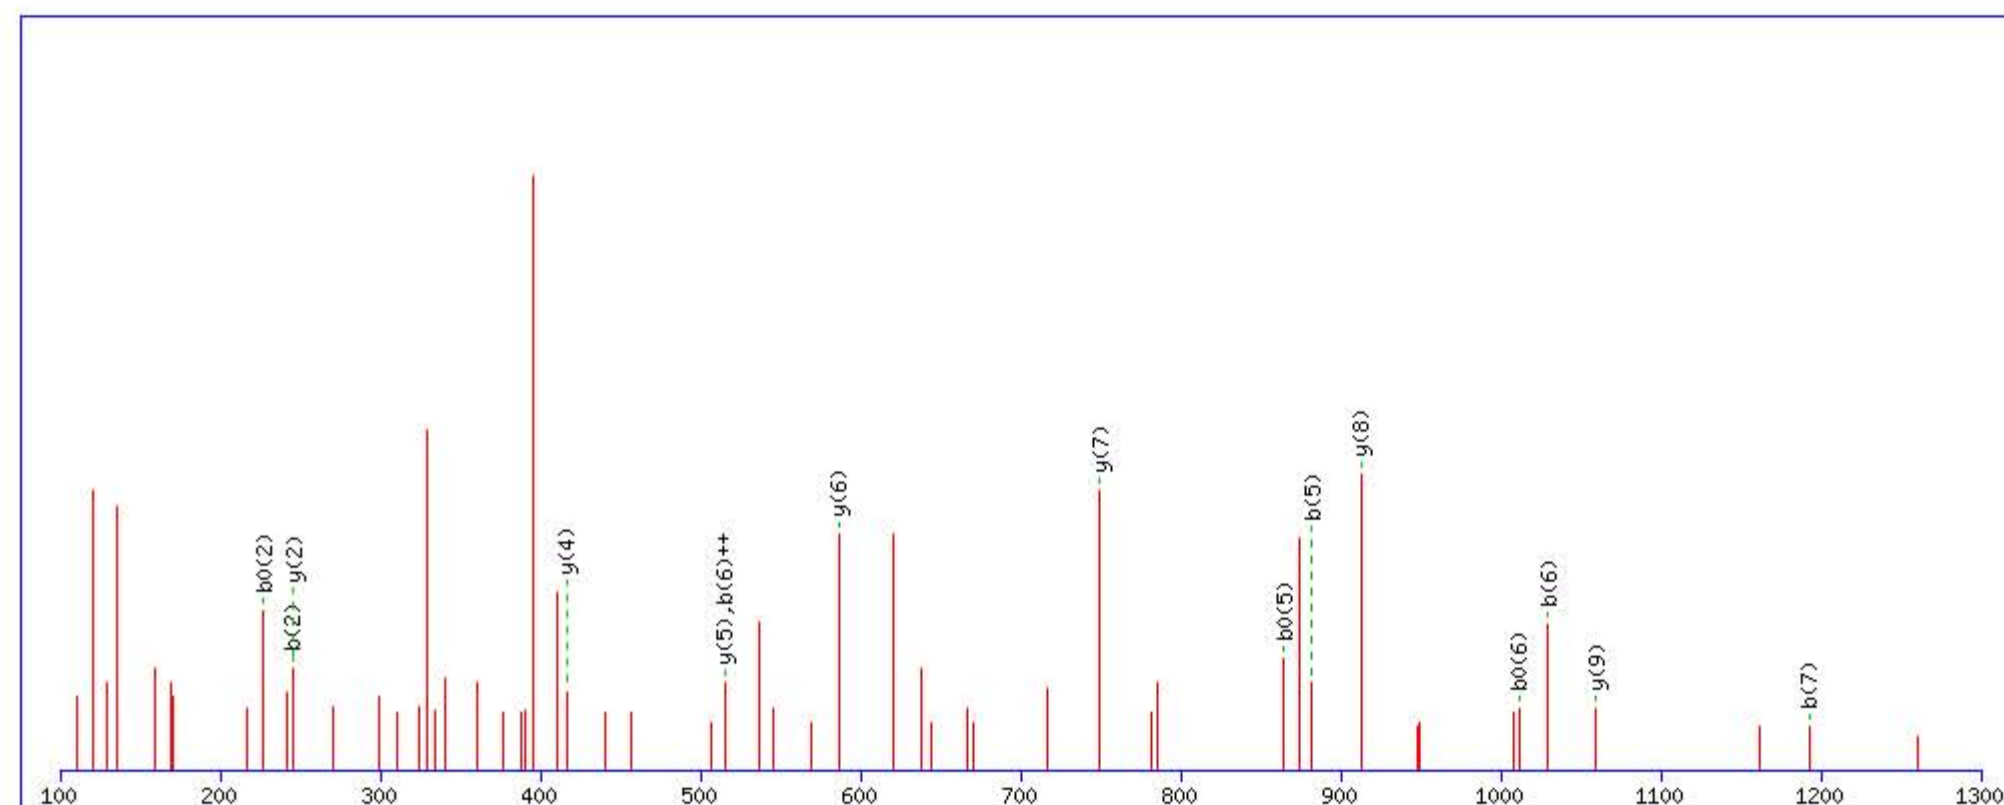

Monoisotopic mass of neutral peptide Mr(calc): 1939.975372

Fixed modifications: Carbamidomethyl (C) (apply to specified residues or termini only)

Variable modifications:

Q4 : Biotin:Thermo-21345 (Q)

Ions Score: 26 Expect: 0.077

Matches : 15/132 fragment ions using 33 most intense peaks [\(help\)](#)

| #  | b                  | b <sup>++</sup>   | b <sup>*</sup> | b <sup>*++</sup> | b <sup>0</sup>     | b <sup>0++</sup> | Seq. | y                  | y <sup>++</sup> | y <sup>*</sup> | y <sup>*++</sup> | y <sup>0</sup> | y <sup>0++</sup> | #  |
|----|--------------------|-------------------|----------------|------------------|--------------------|------------------|------|--------------------|-----------------|----------------|------------------|----------------|------------------|----|
| 1  | 130.049869         | 65.528572         |                |                  | 112.039304         | 56.523290        | E    |                    |                 |                |                  |                |                  | 14 |
| 2  | <b>245.076812</b>  | 123.042044        |                |                  | <b>227.066247</b>  | 114.036762       | D    | 1811.940058        | 906.473667      | 1794.913509    | 897.960393       | 1793.929493    | 897.468385       | 13 |
| 3  | 342.129576         | 171.568426        |                |                  | 324.119011         | 162.563144       | P    | 1696.913115        | 848.960196      | 1679.886566    | 840.446921       | 1678.902550    | 839.954913       | 12 |
| 4  | 781.354902         | 391.181089        | 764.328353     | 382.667815       | 763.344337         | 382.175807       | Q    | 1599.860351        | 800.433814      | 1582.833802    | 791.920539       | 1581.849786    | 791.428531       | 11 |
| 5  | <b>882.402581</b>  | 441.704929        | 865.376032     | 433.191654       | <b>864.392016</b>  | 432.699646       | T    | 1160.635025        | 580.821151      | 1143.608476    | 572.307876       | 1142.624460    | 571.815868       | 10 |
| 6  | <b>1029.470995</b> | <b>515.239136</b> | 1012.444446    | 506.725861       | <b>1011.460430</b> | 506.233853       | F    | <b>1059.587346</b> | 530.297311      | 1042.560797    | 521.784037       |                |                  | 9  |
| 7  | <b>1192.534324</b> | 596.770800        | 1175.507775    | 588.257526       | 1174.523759        | 587.765518       | Y    | <b>912.518932</b>  | 456.763104      | 895.492383     | 448.249830       |                |                  | 8  |
| 8  | 1355.597653        | 678.302465        | 1338.571104    | 669.789190       | 1337.587088        | 669.297182       | Y    | <b>749.455603</b>  | 375.231440      | 732.429054     | 366.718165       |                |                  | 7  |
| 9  | 1426.634767        | 713.821022        | 1409.608218    | 705.307747       | 1408.624202        | 704.815739       | A    | <b>586.392274</b>  | 293.699775      | 569.365725     | 285.186501       |                |                  | 6  |
| 10 | 1525.703181        | 763.355229        | 1508.676632    | 754.841954       | 1507.692616        | 754.349946       | V    | <b>515.355160</b>  | 258.181218      | 498.328611     | 249.667944       |                |                  | 5  |
| 11 | 1596.740295        | 798.873786        | 1579.713746    | 790.360511       | 1578.729730        | 789.868503       | A    | <b>416.286746</b>  | 208.647011      | 399.260197     | 200.133737       |                |                  | 4  |
| 12 | 1695.808709        | 848.407993        | 1678.782160    | 839.894718       | 1677.798144        | 839.402710       | V    | 345.249632         | 173.128454      | 328.223083     | 164.615180       |                |                  | 3  |
| 13 | 1794.877123        | 897.942200        | 1777.850574    | 889.428925       | 1776.866558        | 888.936917       | V    | <b>246.181218</b>  | 123.594247      | 229.154669     | 115.080973       |                |                  | 2  |
| 14 |                    |                   |                |                  |                    |                  | K    | 147.112804         | 74.060040       | 130.086255     | 65.546765        |                |                  | 1  |

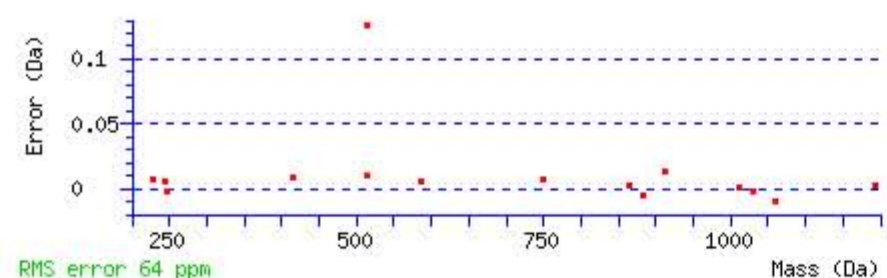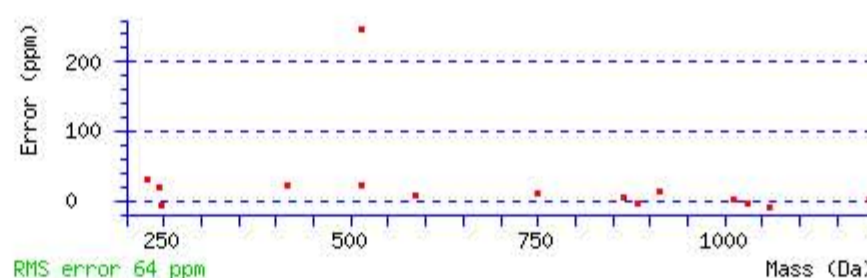

NCBI BLAST search of **EDPQTFYYAVAVVK**

(Parameters: blastp, nr protein database, expect=20000, no filter, PAM30)

Other BLAST [web gateways](#)

All matches to this query

| Score | Mr(calc):   | Delta    | Sequence                       |
|-------|-------------|----------|--------------------------------|
| 26.1  | 1939.975372 | 0.008780 | <a href="#">EDPQTFYYAVAVVK</a> |

Mascot: <http://www.matrixscience.com/>



# MASCOT SCIENCE Mascot Search Results

## Peptide View

MS/MS Fragmentation of **KDSGFQMNQLR**

Found in **TRFE\_HUMAN**, Serotransferrin OS=Homo sapiens GN=TF PE=1 SV=3

Match to Query 38243: 1944.974442 from(649.332090,3+) rtinseconds(2082) index(61018)

Title: Locus:1.1.1.1636.12 File:"2013-07-02 CLN FXIII 180 min 3rd FT.wiff"

Data file C:\Program Files (x86)\Matrix Science\Mascot Daemon\mgf\9 FXIII 180 min 3rd\mascot\_daemon\_merge.mgf

Click mouse within plot area to zoom in by factor of two about that point

Or, Plot from  to  Da

Label all possible matches  Label matches used for scoring

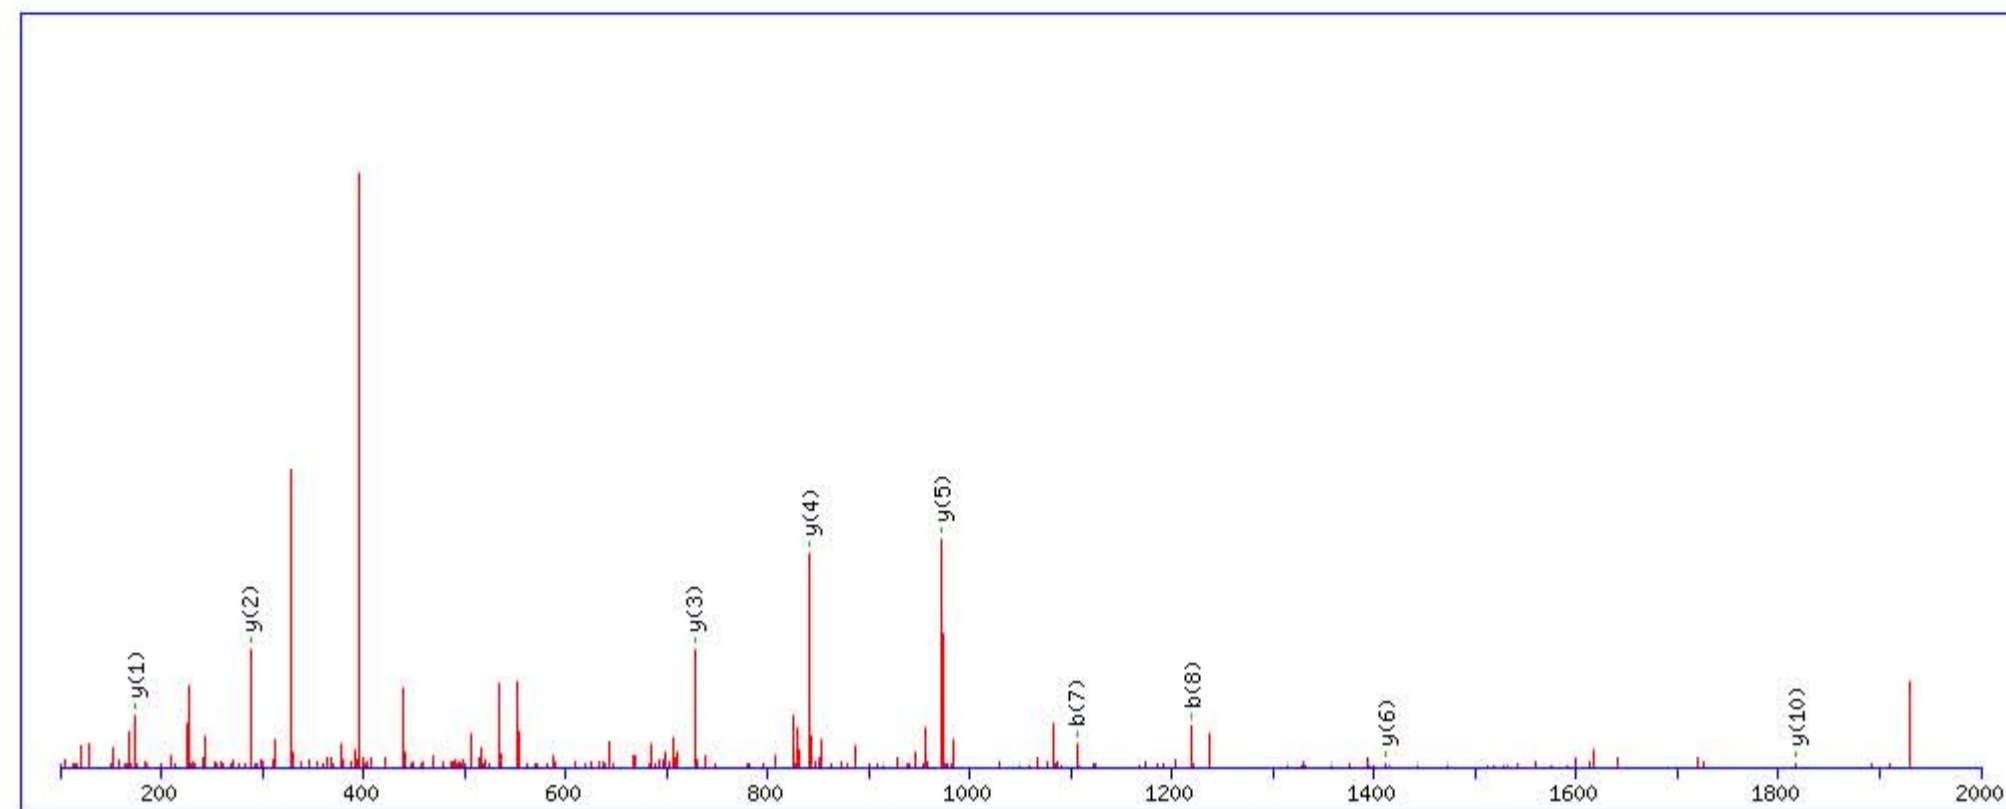

Monoisotopic mass of neutral peptide Mr(calc): 1944.973602

Fixed modifications: Carbamidomethyl (C) (apply to specified residues or termini only)

Variable modifications:

Q6 : Biotin:Thermo-21345 (Q)

Q9 : Biotin:Thermo-21345 (Q)

Ions Score: 36 Expect: 0.0014

Matches : 9/102 fragment ions using 19 most intense peaks [\(help\)](#)

| #  | b                  | b <sup>++</sup> | b <sup>*</sup> | b <sup>+++</sup> | b <sup>0</sup> | b <sup>0++</sup> | Seq. | y                  | y <sup>++</sup> | y <sup>*</sup> | y <sup>+++</sup> | y <sup>0</sup> | y <sup>0++</sup> | #  |
|----|--------------------|-----------------|----------------|------------------|----------------|------------------|------|--------------------|-----------------|----------------|------------------|----------------|------------------|----|
| 1  | 129.102239         | 65.054757       | 112.075690     | 56.541483        |                |                  | K    |                    |                 |                |                  |                |                  | 11 |
| 2  | 244.129182         | 122.568229      | 227.102633     | 114.054955       | 226.118617     | 113.562947       | D    | <b>1817.885929</b> | 909.446603      | 1800.859380    | 900.933328       | 1799.875364    | 900.441320       | 10 |
| 3  | 331.161210         | 166.084243      | 314.134661     | 157.570969       | 313.150645     | 157.078961       | S    | 1702.858986        | 851.933131      | 1685.832437    | 843.419857       | 1684.848421    | 842.927848       | 9  |
| 4  | 388.182674         | 194.594975      | 371.156125     | 186.081701       | 370.172109     | 185.589693       | G    | 1615.826958        | 808.417117      | 1598.800409    | 799.903843       |                |                  | 8  |
| 5  | 535.251088         | 268.129182      | 518.224539     | 259.615908       | 517.240523     | 259.123900       | F    | 1558.805494        | 779.906385      | 1541.778945    | 771.393111       |                |                  | 7  |
| 6  | 974.476414         | 487.741845      | 957.449865     | 479.228571       | 956.465849     | 478.736563       | Q    | <b>1411.737080</b> | 706.372178      | 1394.710531    | 697.858904       |                |                  | 6  |
| 7  | <b>1105.516899</b> | 553.262088      | 1088.490350    | 544.748813       | 1087.506334    | 544.256805       | M    | <b>972.511754</b>  | 486.759515      | 955.485205     | 478.246241       |                |                  | 5  |
| 8  | <b>1219.559826</b> | 610.283551      | 1202.533277    | 601.770277       | 1201.549261    | 601.278268       | N    | <b>841.471269</b>  | 421.239273      | 824.444720     | 412.725998       |                |                  | 4  |
| 9  | 1658.785152        | 829.896214      | 1641.758603    | 821.382940       | 1640.774587    | 820.890932       | Q    | <b>727.428342</b>  | 364.217809      | 710.401793     | 355.704535       |                |                  | 3  |
| 10 | 1771.869216        | 886.438246      | 1754.842667    | 877.924972       | 1753.858651    | 877.432964       | L    | <b>288.203016</b>  | 144.605146      | 271.176467     | 136.091871       |                |                  | 2  |
| 11 |                    |                 |                |                  |                |                  | R    | <b>175.118952</b>  | 88.063114       | 158.092403     | 79.549839        |                |                  | 1  |

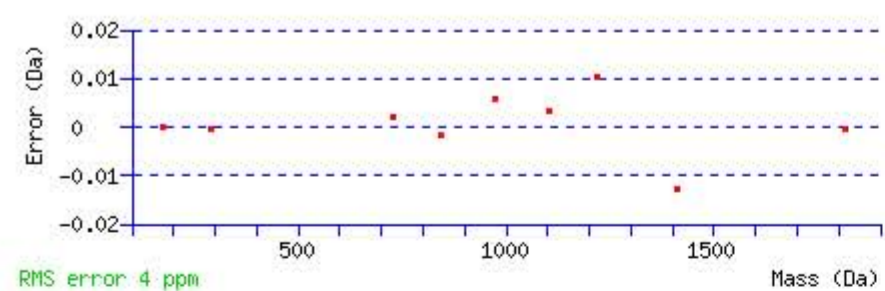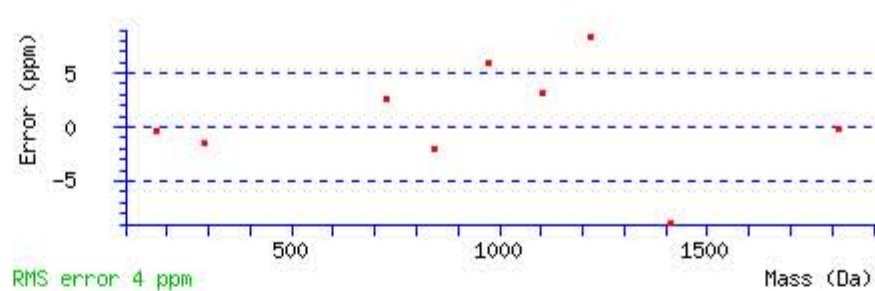

NCBI BLAST search of **KDSGFQMNQLR**

(Parameters: blastp, nr protein database, expect=20000, no filter, PAM30)

Other BLAST [web gateways](#)

All matches to this query

| Score | Mr(calc):   | Delta     | Sequence                         |
|-------|-------------|-----------|----------------------------------|
| 35.6  | 1944.973602 | 0.000840  | <a href="#">KDSGFQMNQLR</a>      |
| 5.0   | 1944.962357 | 0.012085  | <a href="#">KFMEDEQQLR</a>       |
| 4.9   | 1944.991364 | -0.016922 | <a href="#">AGGAFLMAGQVAEQLR</a> |
| 1.8   | 1944.981461 | -0.007019 | <a href="#">KFPPMTSYHRMLLHR</a>  |

Mascot: <http://www.matrixscience.com/>

# MASCOT SEARCH RESULTS

## Peptide View

MS/MS Fragmentation of **DCHLAQVPSHTVVAR**

Found in **TRFE\_HUMAN**, Serotransferrin OS=Homo sapiens GN=TF PE=1 SV=3

Match to Query 39303: 2000.004852 from(667.675560,3+) rtinseconds(1657) index(2988)

Title: Locus:1.1.1.3096.22 File:"2013-07-02 CLN FXIII 180 min 3rd F 1.wiff"

Data file C:\Program Files (x86)\Matrix Science\Mascot Daemon\mgf\9 FXIII 180 min 3rd\mascot\_daemon\_merge.mgf

Click mouse within plot area to zoom in by factor of two about that point

Or, Plot from  to  Da

Label all possible matches  Label matches used for scoring

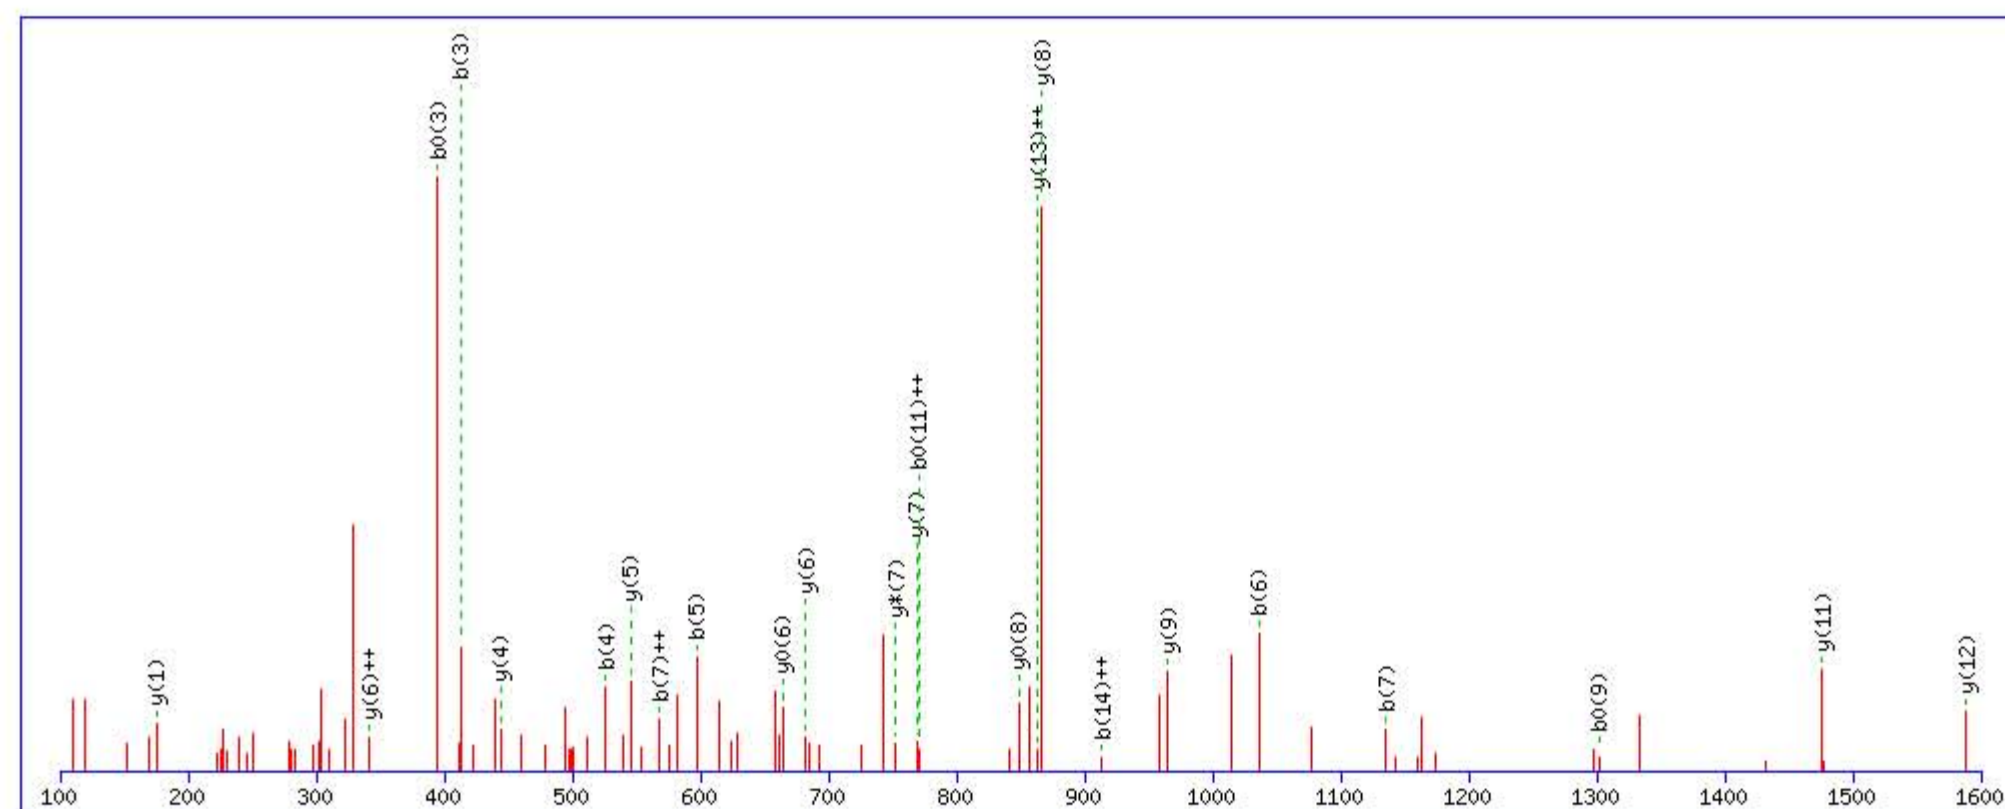

Monoisotopic mass of neutral peptide Mr(calc): 2000.008438

Fixed modifications: Carbamidomethyl (C) (apply to specified residues or termini only)

Variable modifications:

Q6 : Biotin:Thermo-21345 (Q)

Ions Score: 32 Expect: 0.0017

Matches : 24/150 fragment ions using 62 most intense peaks [\(help\)](#)

| #  | b                  | b <sup>++</sup>   | b <sup>*</sup> | b <sup>*++</sup> | b <sup>0</sup>     | b <sup>0++</sup>  | Seq. | y                  | y <sup>++</sup>   | y <sup>*</sup>    | y <sup>*++</sup> | y <sup>0</sup>    | y <sup>0++</sup> | #  |
|----|--------------------|-------------------|----------------|------------------|--------------------|-------------------|------|--------------------|-------------------|-------------------|------------------|-------------------|------------------|----|
| 1  | 116.034219         | 58.520748         |                |                  | 98.023654          | 49.515465         | D    |                    |                   |                   |                  |                   |                  | 15 |
| 2  | 276.064868         | 138.536072        |                |                  | 258.054303         | 129.530790        | C    | 1885.988756        | 943.498016        | 1868.962207       | 934.984742       | 1867.978191       | 934.492734       | 14 |
| 3  | <b>413.123780</b>  | 207.065528        |                |                  | <b>395.113215</b>  | 198.060245        | H    | 1725.958107        | <b>863.482692</b> | 1708.931558       | 854.969417       | 1707.947542       | 854.477409       | 13 |
| 4  | <b>526.207844</b>  | 263.607560        |                |                  | 508.197279         | 254.602278        | L    | <b>1588.899195</b> | 794.953236        | 1571.872646       | 786.439961       | 1570.888630       | 785.947953       | 12 |
| 5  | <b>597.244958</b>  | 299.126117        |                |                  | 579.234393         | 290.120835        | A    | <b>1475.815131</b> | 738.411204        | 1458.788582       | 729.897929       | 1457.804566       | 729.405921       | 11 |
| 6  | <b>1036.470284</b> | 518.738780        | 1019.443735    | 510.225506       | 1018.459719        | 509.733498        | Q    | 1404.778017        | 702.892647        | 1387.751468       | 694.379372       | 1386.767452       | 693.887364       | 10 |
| 7  | <b>1135.538698</b> | <b>568.272987</b> | 1118.512149    | 559.759713       | 1117.528133        | 559.267705        | V    | <b>965.552691</b>  | 483.279984        | 948.526142        | 474.766709       | 947.542126        | 474.274701       | 9  |
| 8  | 1232.591462        | 616.799369        | 1215.564913    | 608.286095       | 1214.580897        | 607.794087        | P    | <b>866.484277</b>  | 433.745777        | 849.457728        | 425.232502       | <b>848.473712</b> | 424.740494       | 8  |
| 9  | 1319.623490        | 660.315383        | 1302.596941    | 651.802109       | <b>1301.612925</b> | 651.310101        | S    | <b>769.431513</b>  | 385.219395        | <b>752.404964</b> | 376.706120       | 751.420948        | 376.214112       | 7  |
| 10 | 1456.682402        | 728.844839        | 1439.655853    | 720.331565       | 1438.671837        | 719.839557        | H    | <b>682.399485</b>  | <b>341.703381</b> | 665.372936        | 333.190106       | <b>664.388920</b> | 332.698098       | 6  |
| 11 | 1557.730081        | 779.368679        | 1540.703532    | 770.855404       | 1539.719516        | <b>770.363396</b> | T    | <b>545.340573</b>  | 273.173925        | 528.314024        | 264.660650       | 527.330008        | 264.168642       | 5  |
| 12 | 1656.798495        | 828.902886        | 1639.771946    | 820.389611       | 1638.787930        | 819.897603        | V    | <b>444.292894</b>  | 222.650085        | 427.266345        | 214.136811       |                   |                  | 4  |
| 13 | 1755.866909        | 878.437093        | 1738.840360    | 869.923818       | 1737.856344        | 869.431810        | V    | 345.224480         | 173.115878        | 328.197931        | 164.602603       |                   |                  | 3  |
| 14 | 1826.904023        | <b>913.955650</b> | 1809.877474    | 905.442375       | 1808.893458        | 904.950367        | A    | 246.156066         | 123.581671        | 229.129517        | 115.068396       |                   |                  | 2  |
| 15 |                    |                   |                |                  |                    |                   | R    | <b>175.118952</b>  | 88.063114         | 158.092403        | 79.549839        |                   |                  | 1  |

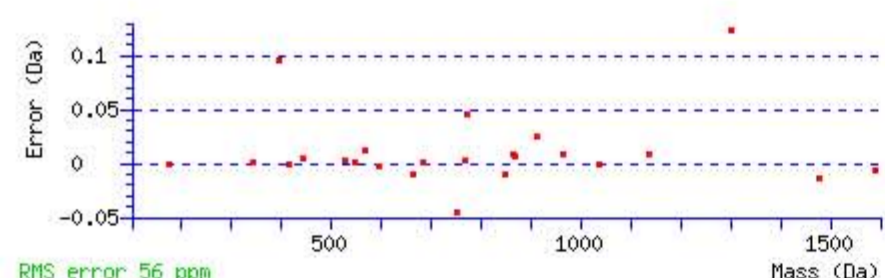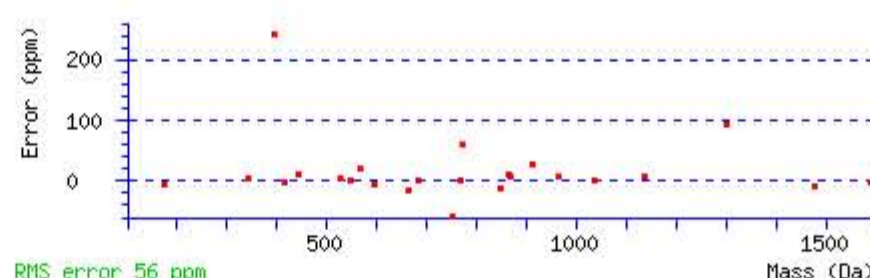

NCBI BLAST search of **DCHLAQVPSHTVVAR**

(Parameters: blastp, nr protein database, expect=20000, no filter, PAM30)

Other BLAST [web gateways](#)

All matches to this query

| Score | Mr(calc):   | Delta     | Sequence                          |
|-------|-------------|-----------|-----------------------------------|
| 32.3  | 2000.008438 | -0.003586 | <a href="#">DCHLAQVPSHTVVAR</a>   |
| 2.6   | 1999.997162 | 0.007690  | <a href="#">ECGKAFAHMSVLIKHEK</a> |
| 0.5   | 1999.978561 | 0.026291  | <a href="#">GFTAASDSDLLAQTHR</a>  |

Mascot: <http://www.matrixscience.com/>

# MASCOT Search Results

## Peptide View

MS/MS Fragmentation of **EDLIWELLNQAQEHFGK**

Found in **TRFE\_HUMAN**, Serotransferrin OS=Homo sapiens GN=TF PE=1 SV=3

Match to Query 46112: 2380.204452 from(794.408760,3+) rtinseconds(3303) index(67804)  
 Title: Locus:1.1.1.2055.7 File:"2013-07-02 CLN FXIII 180 min 3rd FT.wiff"  
 Data file C:\Program Files (x86)\Matrix Science\Mascot Daemon\mgf9 FXIII 180 min 3rd\mascot\_daemon\_merge.mgf

Click mouse within plot area to zoom in by factor of two about that point  
 Or, Plot from  to  Da   
 Label all possible matches  Label matches used for scoring

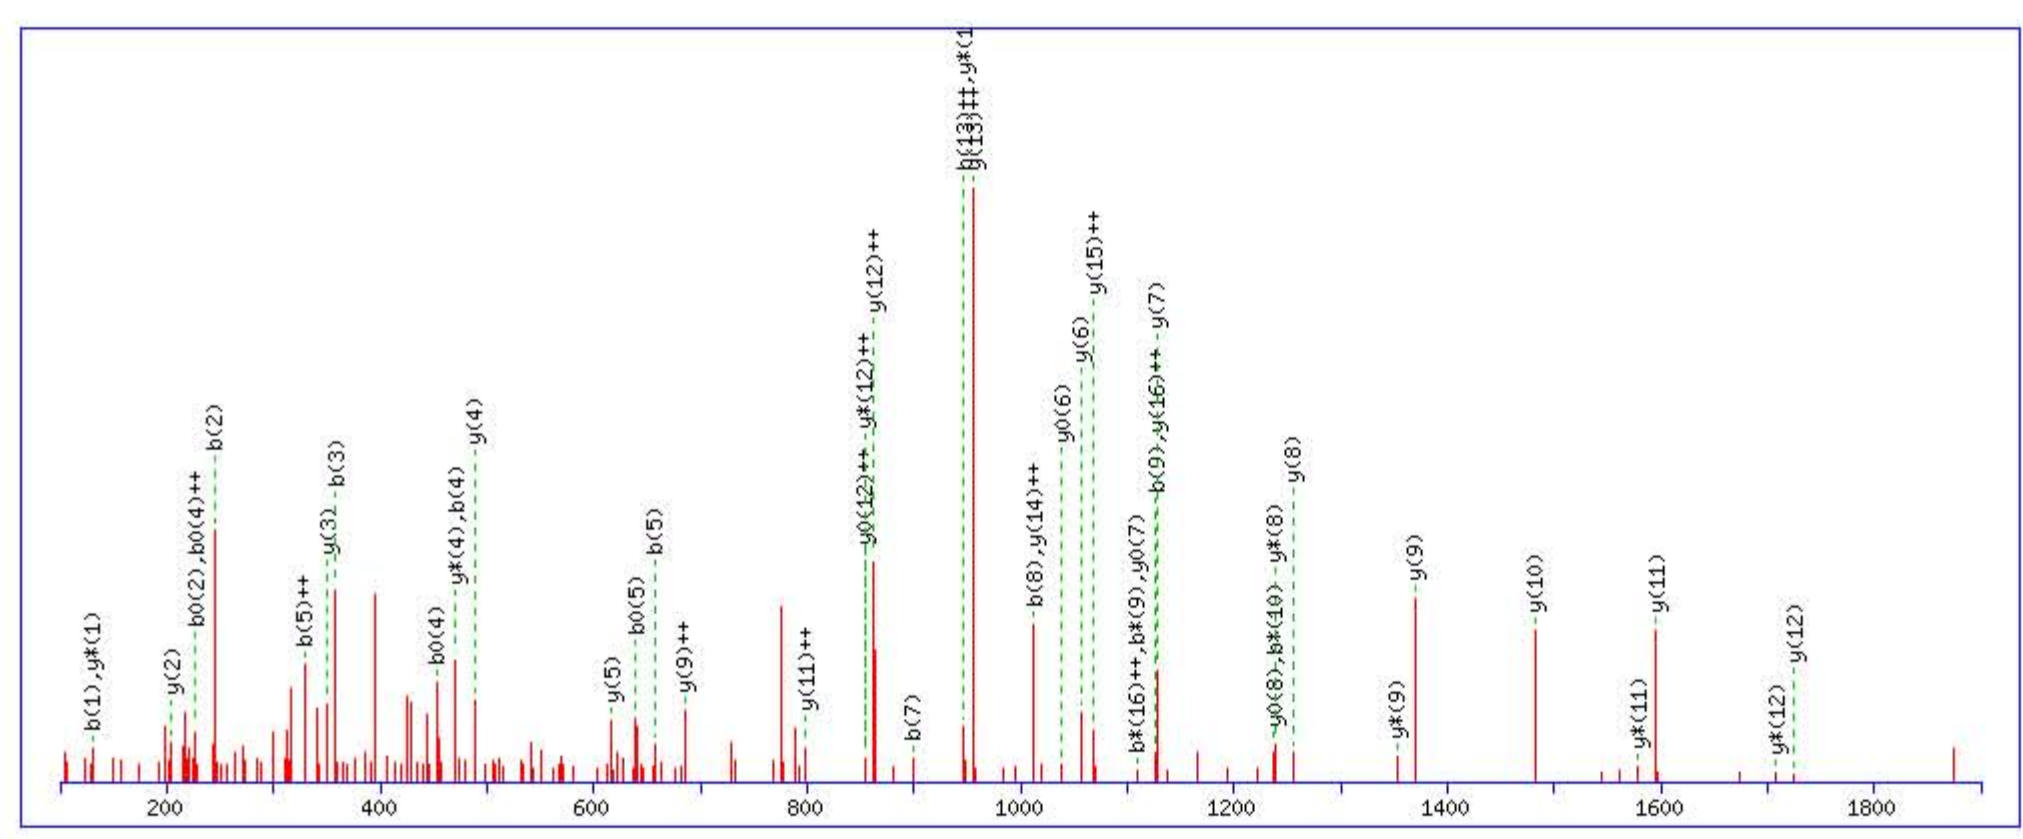

Monoisotopic mass of neutral peptide Mr(calc): 2380.188522  
 Fixed modifications: Carbamidomethyl (C) (apply to specified residues or termini only)  
 Variable modifications:  
 Q12 : Biotin:Thermo-21345 (Q)  
 Ions Score: 59 Expect: 7.8e-006  
 Matches : 47/168 fragment ions using 72 most intense peaks [\(help\)](#)

| #  | b           | b <sup>++</sup> | b <sup>*</sup> | b <sup>*++</sup> | b <sup>0</sup> | b <sup>0++</sup> | Seq. | y           | y <sup>++</sup> | y <sup>*</sup> | y <sup>*++</sup> | y <sup>0</sup> | y <sup>0++</sup> | #  |
|----|-------------|-----------------|----------------|------------------|----------------|------------------|------|-------------|-----------------|----------------|------------------|----------------|------------------|----|
| 1  | 130.049869  | 65.528572       |                |                  | 112.039304     | 56.523290        | E    |             |                 |                |                  |                |                  | 17 |
| 2  | 245.076812  | 123.042044      |                |                  | 227.066247     | 114.036762       | D    | 2252.153237 | 1126.580256     | 2235.126688    | 1118.066982      | 2234.142672    | 1117.574974      | 16 |
| 3  | 358.160876  | 179.584076      |                |                  | 340.150311     | 170.578794       | L    | 2137.126294 | 1069.066785     | 2120.099745    | 1060.553510      | 2119.115729    | 1060.061502      | 15 |
| 4  | 471.244940  | 236.126108      |                |                  | 453.234375     | 227.120826       | I    | 2024.042230 | 1012.524753     | 2007.015681    | 1004.011479      | 2006.031665    | 1003.519470      | 14 |
| 5  | 657.324253  | 329.165765      |                |                  | 639.313688     | 320.160482       | W    | 1910.958166 | 955.982721      | 1893.931617    | 947.469447       | 1892.947601    | 946.977438       | 13 |
| 6  | 786.366846  | 393.687061      |                |                  | 768.356281     | 384.681779       | E    | 1724.878853 | 862.943064      | 1707.852304    | 854.429790       | 1706.868288    | 853.937782       | 12 |
| 7  | 899.450910  | 450.229093      |                |                  | 881.440345     | 441.223811       | L    | 1595.836260 | 798.421768      | 1578.809711    | 789.908493       | 1577.825695    | 789.416485       | 11 |
| 8  | 1012.534974 | 506.771125      |                |                  | 994.524409     | 497.765843       | L    | 1482.752196 | 741.879736      | 1465.725647    | 733.366461       | 1464.741631    | 732.874453       | 10 |
| 9  | 1126.577901 | 563.792589      | 1109.551352    | 555.279314       | 1108.567336    | 554.787306       | N    | 1369.668132 | 685.337704      | 1352.641583    | 676.824429       | 1351.657567    | 676.332421       | 9  |
| 10 | 1254.636479 | 627.821878      | 1237.609930    | 619.308603       | 1236.625914    | 618.816595       | Q    | 1255.625205 | 628.316240      | 1238.598656    | 619.802966       | 1237.614640    | 619.310958       | 8  |
| 11 | 1325.673593 | 663.340435      | 1308.647044    | 654.827160       | 1307.663028    | 654.335152       | A    | 1127.566627 | 564.286951      | 1110.540078    | 555.773677       | 1109.556062    | 555.281669       | 7  |
| 12 | 1764.898919 | 882.953098      | 1747.872370    | 874.439823       | 1746.888354    | 873.947815       | Q    | 1056.529513 | 528.768395      | 1039.502964    | 520.255120       | 1038.518948    | 519.763112       | 6  |
| 13 | 1893.941512 | 947.474394      | 1876.914963    | 938.961120       | 1875.930947    | 938.469112       | E    | 617.304187  | 309.155732      | 600.277638     | 300.642457       | 599.293622     | 300.150449       | 5  |
| 14 | 2031.000424 | 1016.003850     | 2013.973875    | 1007.490576      | 2012.989859    | 1006.998568      | H    | 488.261594  | 244.634435      | 471.235045     | 236.121160       |                |                  | 4  |
| 15 | 2178.068838 | 1089.538057     | 2161.042289    | 1081.024782      | 2160.058273    | 1080.532774      | F    | 351.202682  | 176.104979      | 334.176133     | 167.591704       |                |                  | 3  |
| 16 | 2235.090302 | 1118.048789     | 2218.063753    | 1109.535514      | 2217.079737    | 1109.043506      | G    | 204.134268  | 102.570772      | 187.107719     | 94.057497        |                |                  | 2  |
| 17 |             |                 |                |                  |                |                  | K    | 147.112804  | 74.060040       | 130.086255     | 65.546765        |                |                  | 1  |

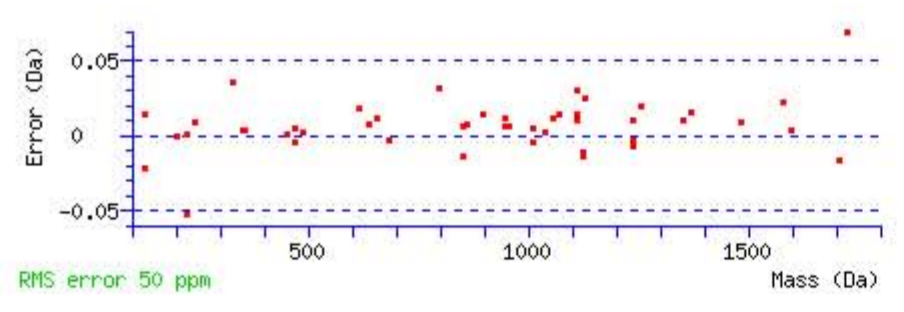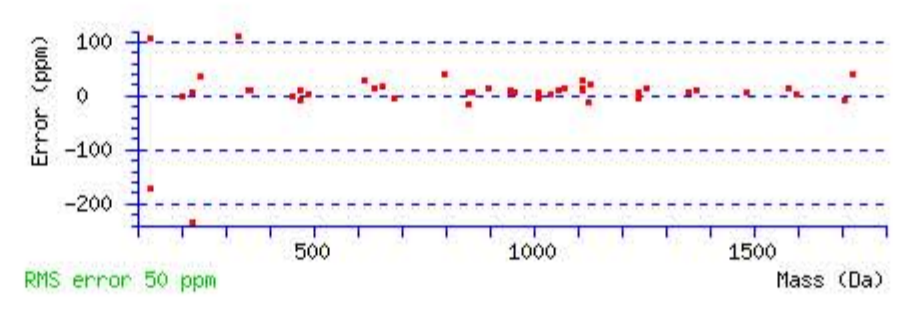

NCBI BLAST search of **EDLIWELLNQAQEHFGK**  
 (Parameters: blastp, nr protein database, expect=20000, no filter, PAM30)  
 Other BLAST [web gateways](#)

### All matches to this query

| Score | Mr(calc):   | Delta     | Sequence                          |
|-------|-------------|-----------|-----------------------------------|
| 59.0  | 2380.188522 | 0.015930  | <a href="#">EDLIWELLNQAQEHFGK</a> |
| 44.4  | 2380.188522 | 0.015930  | <a href="#">EDLIWELLNQAQEHFGK</a> |
| 4.6   | 2380.212997 | -0.008545 | <a href="#">ELTLEHMETERLELAQK</a> |

# MASCOT Search Results

## Peptide View

MS/MS Fragmentation of **SMGGKEDLIWELLNQAQEHFGK**

Found in **TRFE\_HUMAN**, Serotransferrin OS=Homo sapiens GN=TF PE=1 SV=3

Match to Query 52080: 2840.414816 from(711.110980,4+) rtinseconds(3018) index(66772)

Title: Locus:1.1.1.1959.4 File:"2013-07-02 CLN FXIII 180 min 3rd FT.wiff"

Data file C:\Program Files (x86)\Matrix Science\Mascot Daemon\mgf9 FXIII 180 min 3rd\mascot\_daemon\_merge.mgf

Click mouse within plot area to zoom in by factor of two about that point

Or, Plot from  to  Da

Label all possible matches  Label matches used for scoring

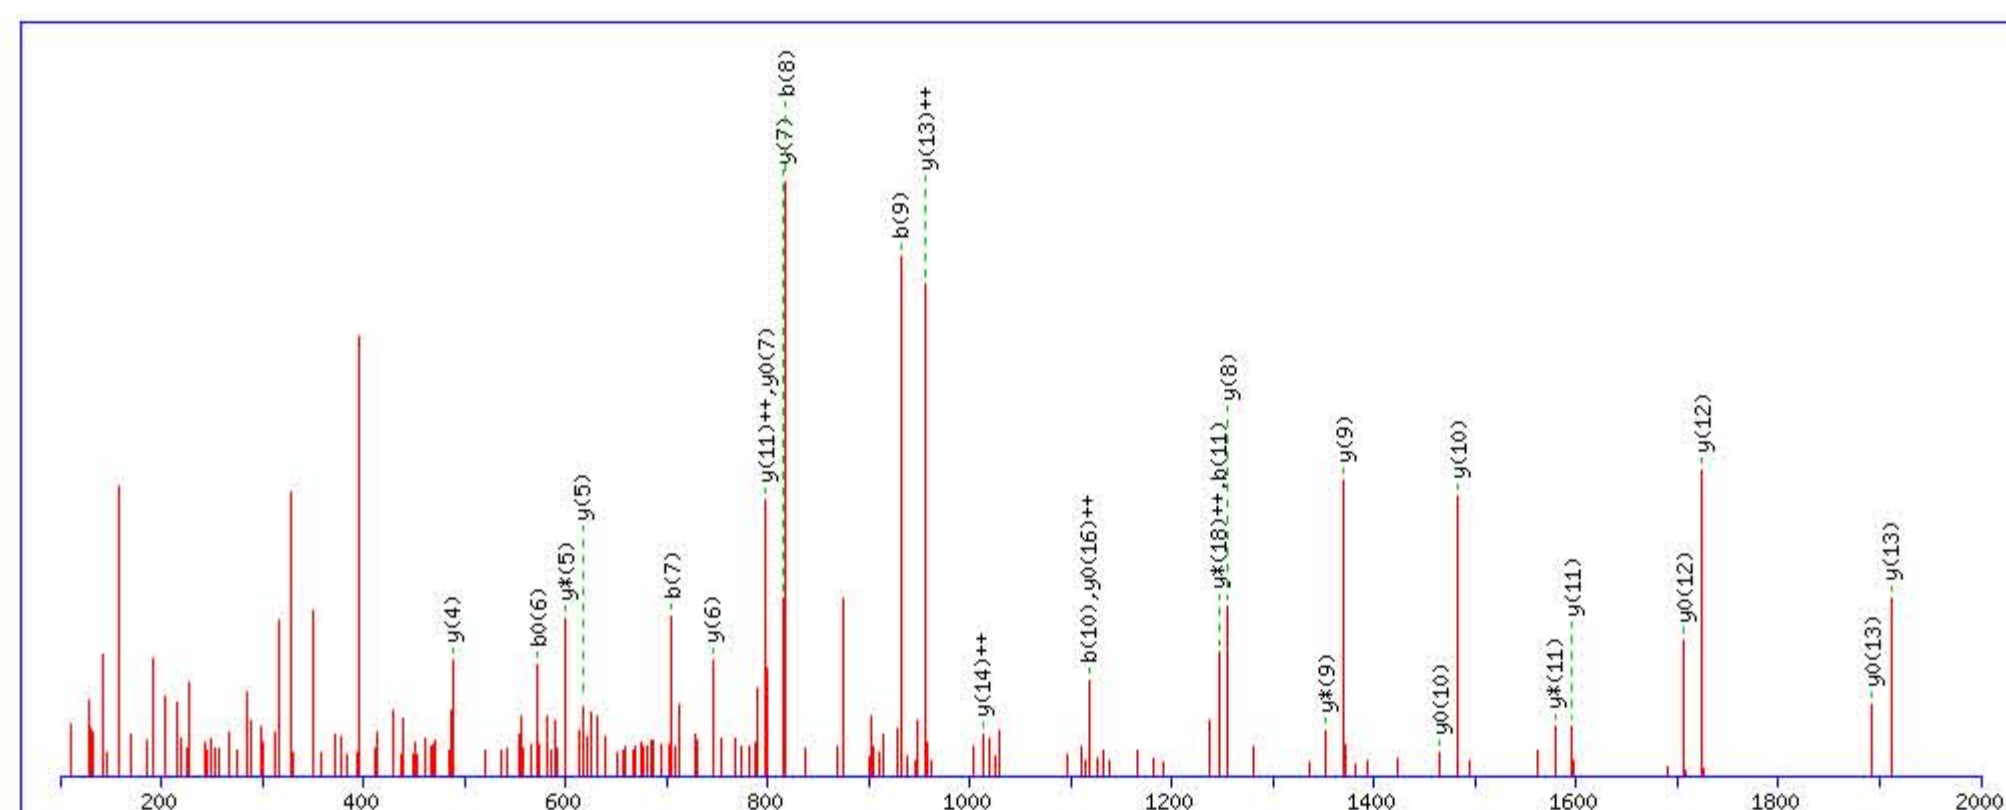

Monoisotopic mass of neutral peptide Mr(calc): 2840.398926

Fixed modifications: Carbamidomethyl (C) (apply to specified residues or termini only)

Variable modifications:

Q15 : Biotin:Thermo-21345 (Q)

Ions Score: 61 Expect: 2.3e-006

Matches : 28/236 fragment ions using 36 most intense peaks [\(help\)](#)

| #  | b           | b <sup>++</sup> | b <sup>+</sup> | b <sup>+++</sup> | b <sup>0</sup> | b <sup>0++</sup> | Seq. | y           | y <sup>++</sup> | y <sup>+</sup> | y <sup>+++</sup> | y <sup>0</sup> | y <sup>0++</sup> | #  |
|----|-------------|-----------------|----------------|------------------|----------------|------------------|------|-------------|-----------------|----------------|------------------|----------------|------------------|----|
| 1  | 88.039304   | 44.523290       |                |                  | 70.028739      | 35.518008        | S    |             |                 |                |                  |                |                  | 22 |
| 2  | 219.079789  | 110.043532      |                |                  | 201.069224     | 101.038250       | M    | 2754.374206 | 1377.690741     | 2737.347657    | 1369.177466      | 2736.363641    | 1368.685458      | 21 |
| 3  | 276.101253  | 138.554264      |                |                  | 258.090688     | 129.548982       | G    | 2623.333721 | 1312.170498     | 2606.307172    | 1303.657224      | 2605.323156    | 1303.165216      | 20 |
| 4  | 333.122717  | 167.064996      |                |                  | 315.112152     | 158.059714       | G    | 2566.312257 | 1283.659766     | 2549.285708    | 1275.146492      | 2548.301692    | 1274.654484      | 19 |
| 5  | 461.217680  | 231.112478      | 444.191131     | 222.599203       | 443.207115     | 222.107195       | K    | 2509.290793 | 1255.149034     | 2492.264244    | 1246.635760      | 2491.280228    | 1246.143752      | 18 |
| 6  | 590.260273  | 295.633775      | 573.233724     | 287.120500       | 572.249708     | 286.628492       | E    | 2381.195830 | 1191.101553     | 2364.169281    | 1182.588278      | 2363.185265    | 1182.096270      | 17 |
| 7  | 705.287216  | 353.147246      | 688.260667     | 344.633972       | 687.276651     | 344.141964       | D    | 2252.153237 | 1126.580256     | 2235.126688    | 1118.066982      | 2234.142672    | 1117.574974      | 16 |
| 8  | 818.371280  | 409.689278      | 801.344731     | 401.176004       | 800.360715     | 400.683996       | L    | 2137.126294 | 1069.066785     | 2120.099745    | 1060.553510      | 2119.115729    | 1060.061502      | 15 |
| 9  | 931.455344  | 466.231310      | 914.428795     | 457.718036       | 913.444779     | 457.226028       | I    | 2024.042230 | 1012.524753     | 2007.015681    | 1004.011479      | 2006.031665    | 1003.519471      | 14 |
| 10 | 1117.534657 | 559.270967      | 1100.508108    | 550.757692       | 1099.524092    | 550.265684       | W    | 1910.958166 | 955.982721      | 1893.931617    | 947.469447       | 1892.947601    | 946.977439       | 13 |
| 11 | 1246.577250 | 623.792263      | 1229.550701    | 615.278989       | 1228.566685    | 614.786981       | E    | 1724.878853 | 862.943065      | 1707.852304    | 854.429790       | 1706.868288    | 853.937782       | 12 |
| 12 | 1359.661314 | 680.334295      | 1342.634765    | 671.821021       | 1341.650749    | 671.329012       | L    | 1595.836260 | 798.421768      | 1578.809711    | 789.908494       | 1577.825695    | 789.416486       | 11 |
| 13 | 1472.745378 | 736.876327      | 1455.718829    | 728.363052       | 1454.734813    | 727.871044       | L    | 1482.752196 | 741.879736      | 1465.725647    | 733.366462       | 1464.741631    | 732.874454       | 10 |
| 14 | 1586.788305 | 793.897790      | 1569.761756    | 785.384516       | 1568.777740    | 784.892508       | N    | 1369.668132 | 685.337704      | 1352.641583    | 676.824430       | 1351.657567    | 676.332422       | 9  |
| 15 | 2026.013631 | 1013.510454     | 2008.987082    | 1004.997179      | 2008.003066    | 1004.505171      | Q    | 1255.625205 | 628.316241      | 1238.598656    | 619.802966       | 1237.614640    | 619.310958       | 8  |
| 16 | 2097.050745 | 1049.029010     | 2080.024196    | 1040.515736      | 2079.040180    | 1040.023728      | A    | 816.399879  | 408.703578      | 799.373330     | 400.190303       | 798.389314     | 399.698295       | 7  |
| 17 | 2225.109323 | 1113.058300     | 2208.082774    | 1104.545025      | 2207.098758    | 1104.053017      | Q    | 745.362765  | 373.185021      | 728.336216     | 364.671746       | 727.352200     | 364.179738       | 6  |
| 18 | 2354.151916 | 1177.579596     | 2337.125367    | 1169.066322      | 2336.141351    | 1168.574314      | E    | 617.304187  | 309.155732      | 600.277638     | 300.642457       | 599.293622     | 300.150449       | 5  |
| 19 | 2491.210828 | 1246.109052     | 2474.184279    | 1237.595777      | 2473.200263    | 1237.103770      | H    | 488.261594  | 244.634435      | 471.235045     | 236.121160       |                |                  | 4  |
| 20 | 2638.279242 | 1319.643259     | 2621.252693    | 1311.129984      | 2620.268677    | 1310.637976      | F    | 351.202682  | 176.104979      | 334.176133     | 167.591704       |                |                  | 3  |
| 21 | 2695.300706 | 1348.153991     | 2678.274157    | 1339.640716      | 2677.290141    | 1339.148708      | G    | 204.134268  | 102.570772      | 187.107719     | 94.057497        |                |                  | 2  |
| 22 |             |                 |                |                  |                |                  | K    | 147.112804  | 74.060040       | 130.086255     | 65.546765        |                |                  | 1  |

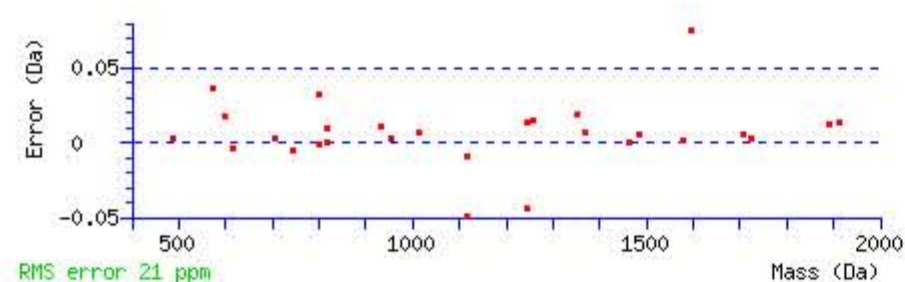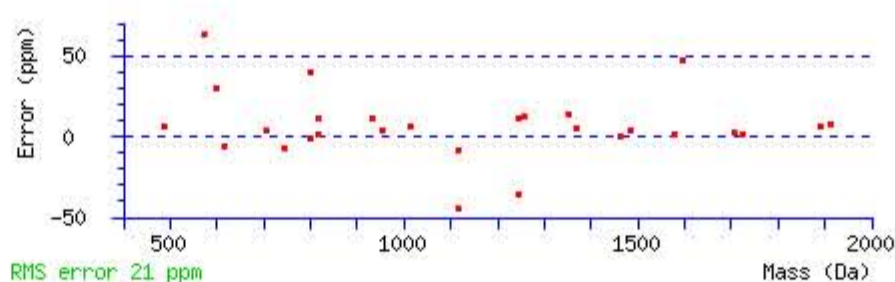

NCBI BLAST search of **SMGGKEDLIWELLNQAQEHFGK**

(Parameters: blastp, nr protein database, expect=20000, no filter, PAM30)

Other BLAST [web gateways](#)

All matches to this query

| Score | Mr(calc):   | Delta    | Sequence                                  |
|-------|-------------|----------|-------------------------------------------|
| 61.0  | 2840.398926 | 0.015890 | <a href="#">SMGGKEDLIWELLNQAQEHFGK</a>    |
| 42.0  | 2840.398926 | 0.015890 | <a href="#">SMGGKEDLIWELLNQAQEHFGK</a>    |
| 0.8   | 2840.394440 | 0.020376 | <a href="#">MNNQTKILDCLMAASIPAVEIFMVK</a> |
| 0.1   | 2840.380539 | 0.034277 | <a href="#">SLGTIQCCDAIDHLCRIIEK</a>      |

# **MASCOT** Mascot Search Results

## Peptide View

MS/MS Fragmentation of **FQNALLVR**

Found in **ALBU\_HUMAN**, Serum albumin OS=Homo sapiens GN=ALB PE=1 SV=2

Match to Query 19562: 1270.718108 from(636.366330,2+) rtinseconds(2129) index(32617)

Title: Locus:1.1.1.3405.9 File:"2013-07-02 CLN FXIII 180 min 3rd F 3.wiff"

Data file C:\Program Files (x86)\Matrix Science\Mascot Daemon\mgf\9 FXIII 180 min 3rd\mascot\_daemon\_merge.mgf

Click mouse within plot area to zoom in by factor of two about that point

Or, Plot from  to  Da

Label all possible matches  Label matches used for scoring

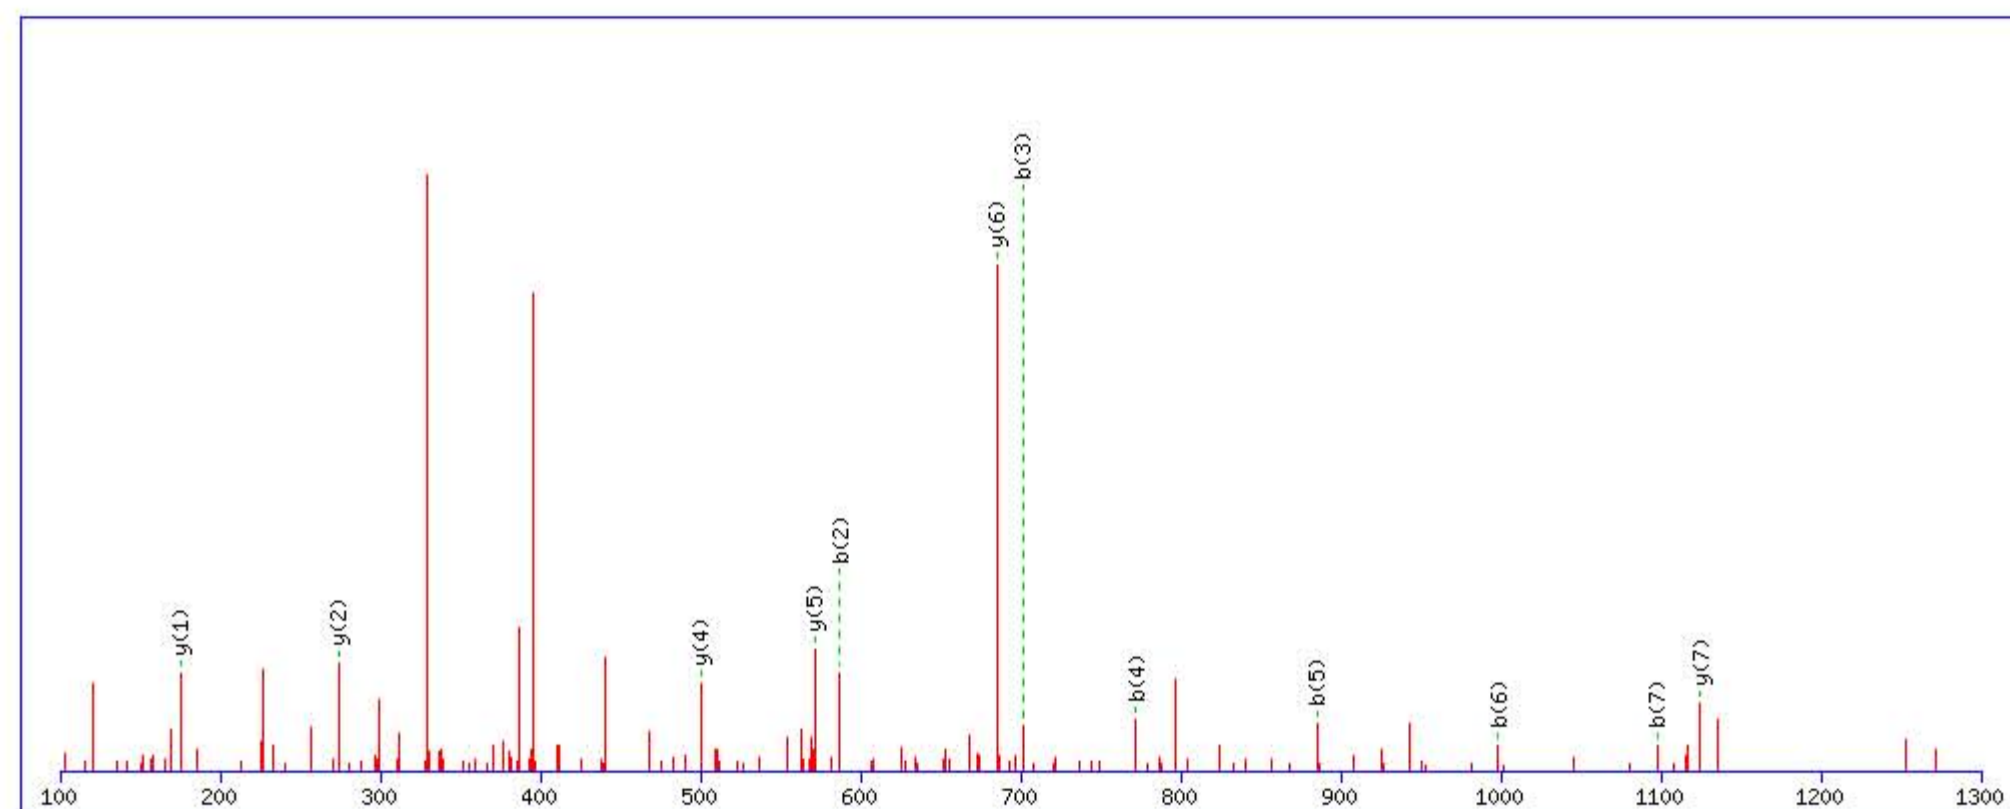

Monoisotopic mass of neutral peptide Mr(calc): 1270.721985

Fixed modifications: Carbamidomethyl (C) (apply to specified residues or termini only)

Variable modifications:

Q2 : Biotin:Thermo-21345 (Q)

Ions Score: 38 Expect: 0.0061

Matches : 12/54 fragment ions using 23 most intense peaks ([help](#))

| # | b                  | b <sup>++</sup> | b <sup>*</sup> | b <sup>*++</sup> | Seq. | y                  | y <sup>++</sup> | y <sup>*</sup> | y <sup>*++</sup> | # |
|---|--------------------|-----------------|----------------|------------------|------|--------------------|-----------------|----------------|------------------|---|
| 1 | 148.075690         | 74.541483       |                |                  | F    |                    |                 |                |                  | 8 |
| 2 | <b>587.301016</b>  | 294.154146      | 570.274467     | 285.640872       | Q    | <b>1124.660861</b> | 562.834068      | 1107.634312    | 554.320794       | 7 |
| 3 | <b>701.343943</b>  | 351.175610      | 684.317394     | 342.662335       | N    | <b>685.435535</b>  | 343.221406      | 668.408986     | 334.708131       | 6 |
| 4 | <b>772.381057</b>  | 386.694166      | 755.354508     | 378.180892       | A    | <b>571.392608</b>  | 286.199942      | 554.366059     | 277.686668       | 5 |
| 5 | <b>885.465121</b>  | 443.236199      | 868.438572     | 434.722924       | L    | <b>500.355494</b>  | 250.681385      | 483.328945     | 242.168110       | 4 |
| 6 | <b>998.549185</b>  | 499.778231      | 981.522636     | 491.264956       | L    | 387.271430         | 194.139353      | 370.244881     | 185.626078       | 3 |
| 7 | <b>1097.617599</b> | 549.312437      | 1080.591050    | 540.799163       | V    | <b>274.187366</b>  | 137.597321      | 257.160817     | 129.084046       | 2 |
| 8 |                    |                 |                |                  | R    | <b>175.118952</b>  | 88.063114       | 158.092403     | 79.549839        | 1 |

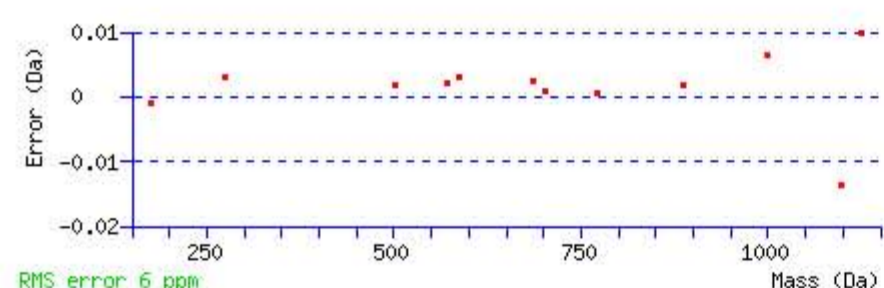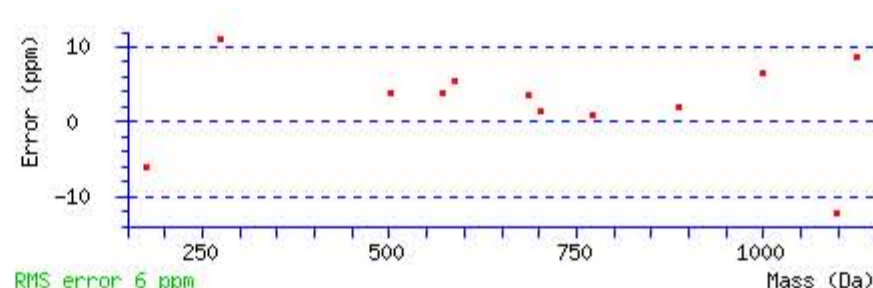

NCBI BLAST search of [FQNALLVR](#)

(Parameters: blastp, nr protein database, expect=20000, no filter, PAM30)

Other BLAST [web gateways](#)

## All matches to this query

| Score | Mr(calc):   | Delta     | Sequence                     |
|-------|-------------|-----------|------------------------------|
| 37.8  | 1270.721985 | -0.003877 | <a href="#">FQNALLVR</a>     |
| 16.2  | 1270.722000 | -0.003892 | <a href="#">FQIAQVVR</a>     |
| 14.3  | 1270.699295 | 0.018813  | <a href="#">QEAEERKLLR</a>   |
| 13.0  | 1270.735687 | -0.017579 | <a href="#">KEAELRSGIIR</a>  |
| 11.7  | 1270.699341 | 0.018767  | <a href="#">AVTLRSGSEPVR</a> |
| 9.1   | 1270.699295 | 0.018813  | <a href="#">AEKLERELQR</a>   |
| 8.2   | 1270.706696 | 0.011412  | <a href="#">LPALLEKNAMR</a>  |
| 6.7   | 1270.725357 | -0.007249 | <a href="#">QKVMAIVR</a>     |
| 6.7   | 1270.733215 | -0.015107 | <a href="#">FQRQILR</a>      |
| 6.6   | 1270.733215 | -0.015107 | <a href="#">MFHIRAVILR</a>   |

# MASCOT Search Results

## Peptide View

MS/MS Fragmentation of **LVAASQAALGL**

Found in **ALBU\_HUMAN**, Serum albumin OS=Homo sapiens GN=ALB PE=1 SV=2

Match to Query 20764: 1323.759728 from(662.887140,2+) rtinseconds(2532) index(34860)

Title: Locus:1.1.1.3545.14 File:"2013-07-02 CLN FXIII 180 min 3rd F 3.wiff"

Data file C:\Program Files (x86)\Matrix Science\Mascot Daemon\mgf9 FXIII 180 min 3rd\mascot\_daemon\_merge.mgf

Click mouse within plot area to zoom in by factor of two about that point

Or, Plot from  to  Da

Label all possible matches  Label matches used for scoring

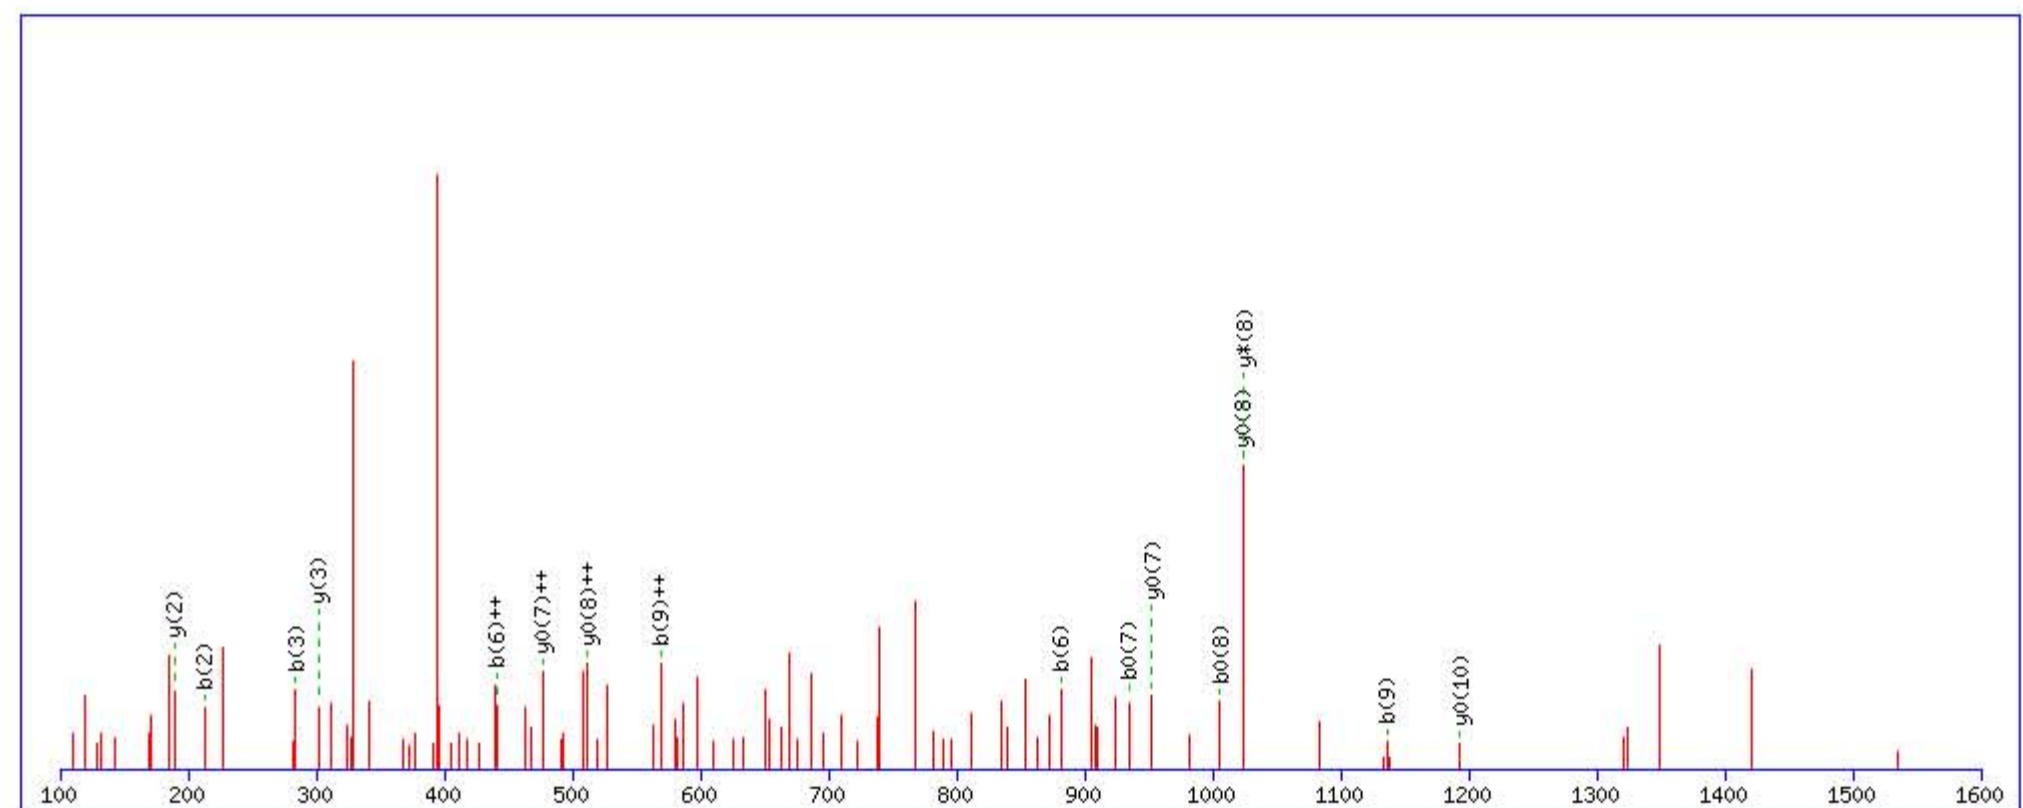

Monoisotopic mass of neutral peptide  $M_r(\text{calc})$ : 1323.758423

Fixed modifications: Carbamidomethyl (C) (apply to specified residues or termini only)

Variable modifications:

Q6 : Biotin:Thermo-21345 (Q)

Ions Score: 26 Expect: 0.022

Matches : 21/80 fragment ions using 44 most intense peaks [\(help\)](#)

| #  | b                  | b <sup>++</sup>   | b <sup>*</sup> | b <sup>*++</sup> | b <sup>0</sup>     | b <sup>0++</sup> | Seq. | y                 | y <sup>++</sup> | y <sup>*</sup>     | y <sup>*++</sup> | y <sup>0</sup>     | y <sup>0++</sup>  | #  |
|----|--------------------|-------------------|----------------|------------------|--------------------|------------------|------|-------------------|-----------------|--------------------|------------------|--------------------|-------------------|----|
| 1  | 114.091340         | 57.549308         |                |                  |                    |                  | L    |                   |                 |                    |                  |                    |                   | 11 |
| 2  | <b>213.159754</b>  | 107.083515        |                |                  |                    |                  | V    | 1211.681657       | 606.344466      | 1194.655108        | 597.831192       | <b>1193.671092</b> | 597.339184        | 10 |
| 3  | <b>284.196868</b>  | 142.602072        |                |                  |                    |                  | A    | 1112.613243       | 556.810259      | 1095.586694        | 548.296985       | 1094.602678        | 547.804977        | 9  |
| 4  | 355.233982         | 178.120629        |                |                  |                    |                  | A    | 1041.576129       | 521.291702      | <b>1024.549580</b> | 512.778428       | <b>1023.565564</b> | <b>512.286420</b> | 8  |
| 5  | 442.266010         | 221.636643        |                |                  | 424.255445         | 212.631361       | S    | 970.539015        | 485.773145      | 953.512466         | 477.259871       | <b>952.528450</b>  | <b>476.767863</b> | 7  |
| 6  | <b>881.491336</b>  | <b>441.249306</b> | 864.464787     | 432.736032       | 863.480771         | 432.244024       | Q    | 883.506987        | 442.257131      | 866.480438         | 433.743857       |                    |                   | 6  |
| 7  | <b>952.528450</b>  | <b>476.767863</b> | 935.501901     | 468.254589       | <b>934.517885</b>  | 467.762581       | A    | 444.281661        | 222.644468      |                    |                  |                    |                   | 5  |
| 8  | <b>1023.565564</b> | <b>512.286420</b> | 1006.539015    | 503.773146       | <b>1005.554999</b> | 503.281138       | A    | 373.244547        | 187.125911      |                    |                  |                    |                   | 4  |
| 9  | <b>1136.649628</b> | <b>568.828452</b> | 1119.623079    | 560.315178       | 1118.639063        | 559.823169       | L    | <b>302.207433</b> | 151.607354      |                    |                  |                    |                   | 3  |
| 10 | <b>1193.671092</b> | 597.339184        | 1176.644543    | 588.825909       | 1175.660527        | 588.333901       | G    | <b>189.123369</b> | 95.065322       |                    |                  |                    |                   | 2  |
| 11 |                    |                   |                |                  |                    |                  | L    | 132.101905        | 66.554590       |                    |                  |                    |                   | 1  |

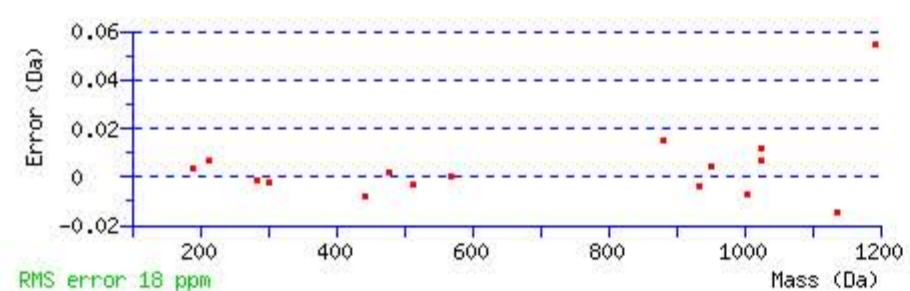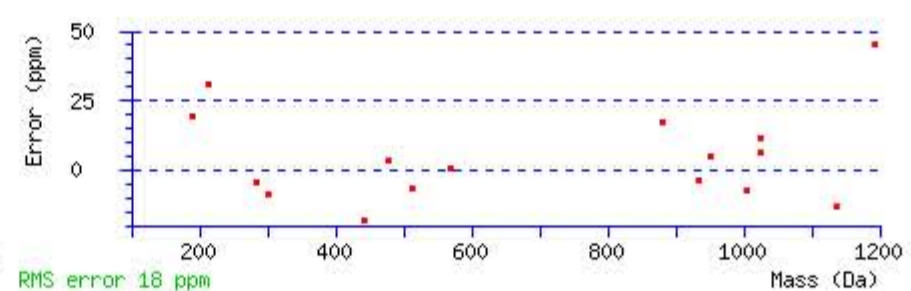

NCBI BLAST search of **LVAASQAALGL**

(Parameters: blastp, nr protein database, expect=20000, no filter, PAM30)

Other BLAST [web gateways](#)

All matches to this query

| Score | $M_r(\text{calc})$ : | Delta    | Sequence           |
|-------|----------------------|----------|--------------------|
| 26.5  | 1323.758423          | 0.001305 | <b>LVAASQAALGL</b> |

Mascot: <http://www.matrixscience.com/>

# MASCOT SCIENCE Mascot Search Results

## Peptide View

MS/MS Fragmentation of **AAFTECCQAADK**

Found in **ALBU\_HUMAN**, Serum albumin OS=Homo sapiens GN=ALB PE=1 SV=2

Match to Query 33341: 1681.718202 from(561.580010,3+) rtinseconds(1635) index(16742)

Title: Locus:1.1.1.3135.11 File:"2013-07-02 CLN FXIII 180 min 3rd F 2.wiff"

Data file C:\Program Files (x86)\Matrix Science\Mascot Daemon\mgf9 FXIII 180 min 3rd\mascot\_daemon\_merge.mgf

Click mouse within plot area to zoom in by factor of two about that point

Or, Plot from  to  Da

Label all possible matches  Label matches used for scoring

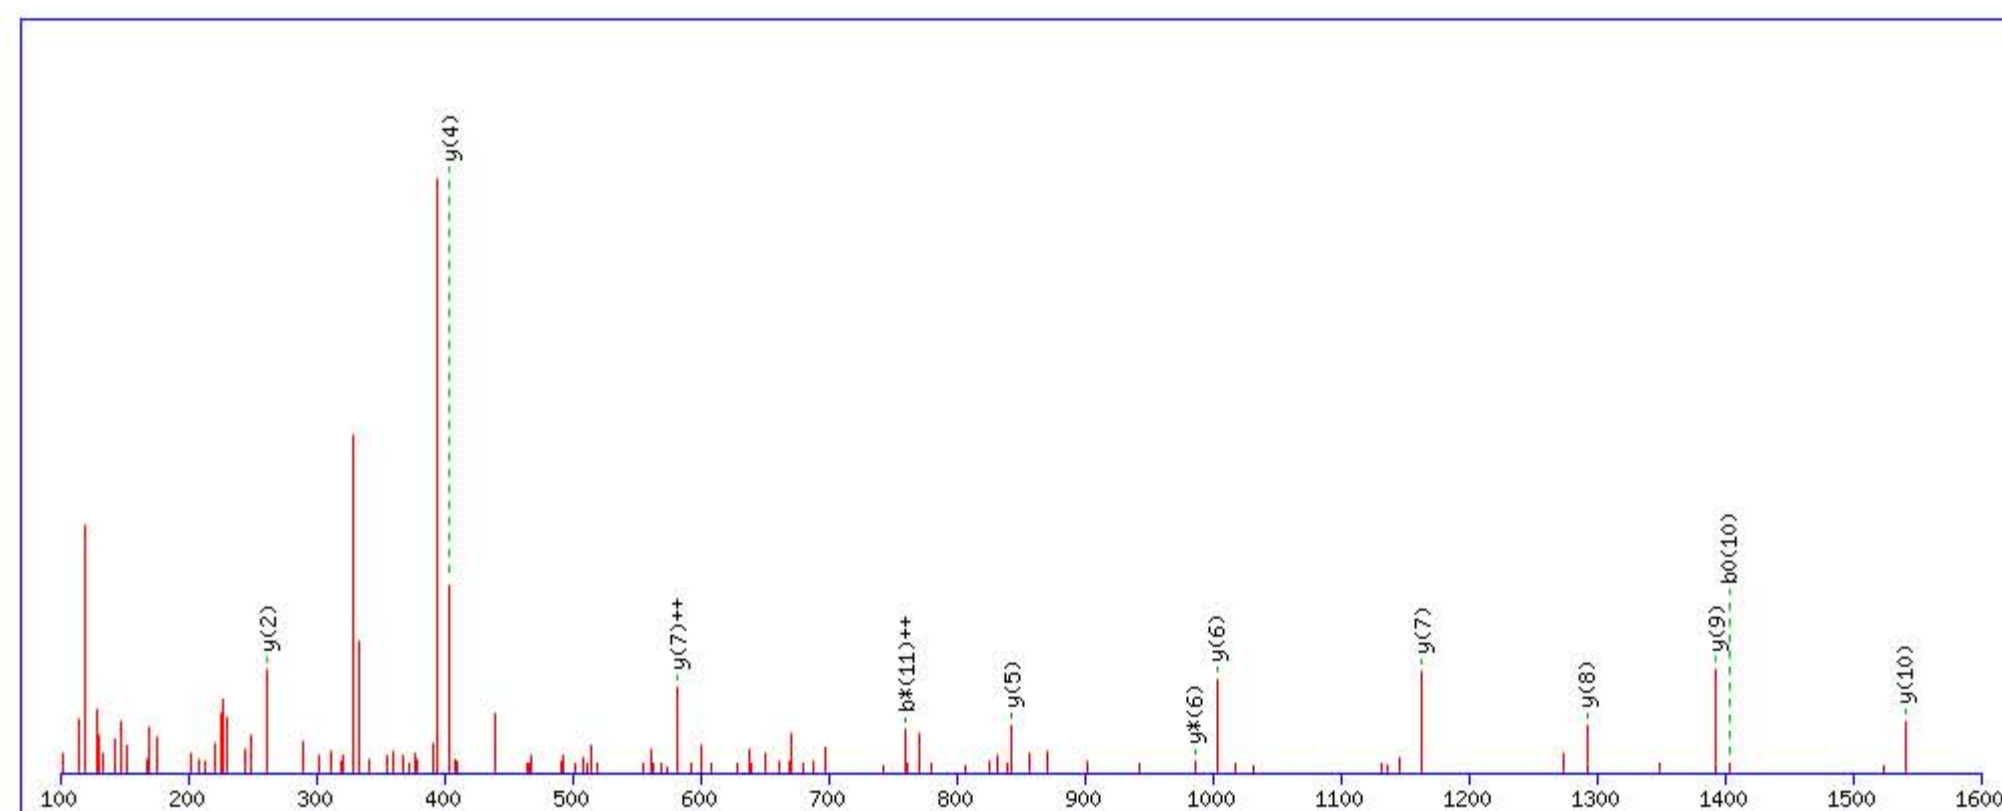

Monoisotopic mass of neutral peptide Mr(calc): 1681.726227

Fixed modifications: Carbamidomethyl (C) (apply to specified residues or termini only)

Variable modifications:

Q8 : Biotin:Thermo-21345 (Q)

Ions Score: 53 Expect: 1.8e-005

Matches : 12/110 fragment ions using 15 most intense peaks [\(help\)](#)

| #  | b           | b <sup>++</sup> | b <sup>+</sup> | b <sup>*++</sup>  | b <sup>0</sup>     | b <sup>0++</sup> | Seq. | y                  | y <sup>++</sup>   | y <sup>+</sup>    | y <sup>*++</sup> | y <sup>0</sup> | y <sup>0++</sup> | #  |
|----|-------------|-----------------|----------------|-------------------|--------------------|------------------|------|--------------------|-------------------|-------------------|------------------|----------------|------------------|----|
| 1  | 72.044390   | 36.525833       |                |                   |                    |                  | A    |                    |                   |                   |                  |                |                  | 12 |
| 2  | 143.081504  | 72.044390       |                |                   |                    |                  | A    | 1611.696399        | 806.351838        | 1594.669850       | 797.838563       | 1593.685834    | 797.346555       | 11 |
| 3  | 290.149918  | 145.578597      |                |                   |                    |                  | F    | <b>1540.659285</b> | 770.833281        | 1523.632736       | 762.320006       | 1522.648720    | 761.827998       | 10 |
| 4  | 391.197597  | 196.102437      |                |                   | 373.187032         | 187.097154       | T    | <b>1393.590871</b> | 697.299074        | 1376.564322       | 688.785799       | 1375.580306    | 688.293791       | 9  |
| 5  | 520.240190  | 260.623733      |                |                   | 502.229625         | 251.618451       | E    | <b>1292.543192</b> | 646.775234        | 1275.516643       | 638.261960       | 1274.532627    | 637.769952       | 8  |
| 6  | 680.270839  | 340.639058      |                |                   | 662.260274         | 331.633775       | C    | <b>1163.500599</b> | <b>582.253938</b> | 1146.474050       | 573.740663       | 1145.490034    | 573.248655       | 7  |
| 7  | 840.301488  | 420.654382      |                |                   | 822.290923         | 411.649100       | C    | <b>1003.469950</b> | 502.238613        | <b>986.443401</b> | 493.725339       | 985.459385     | 493.233331       | 6  |
| 8  | 1279.526814 | 640.267045      | 1262.500265    | 631.753771        | 1261.516249        | 631.261763       | Q    | <b>843.439301</b>  | 422.223289        | 826.412752        | 413.710014       | 825.428736     | 413.218006       | 5  |
| 9  | 1350.563928 | 675.785602      | 1333.537379    | 667.272328        | 1332.553363        | 666.780320       | A    | <b>404.213975</b>  | 202.610626        | 387.187426        | 194.097351       | 386.203410     | 193.605343       | 4  |
| 10 | 1421.601042 | 711.304159      | 1404.574493    | 702.790885        | <b>1403.590477</b> | 702.298877       | A    | 333.176861         | 167.092069        | 316.150312        | 158.578794       | 315.166296     | 158.086786       | 3  |
| 11 | 1536.627985 | 768.817631      | 1519.601436    | <b>760.304356</b> | 1518.617420        | 759.812348       | D    | <b>262.139747</b>  | 131.573512        | 245.113198        | 123.060237       | 244.129182     | 122.568229       | 2  |
| 12 |             |                 |                |                   |                    |                  | K    | 147.112804         | 74.060040         | 130.086255        | 65.546765        |                |                  | 1  |

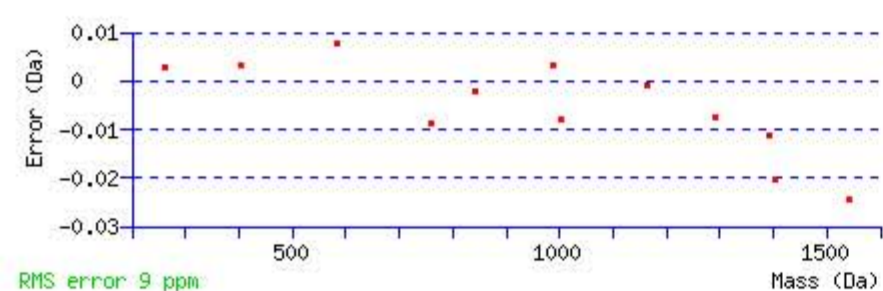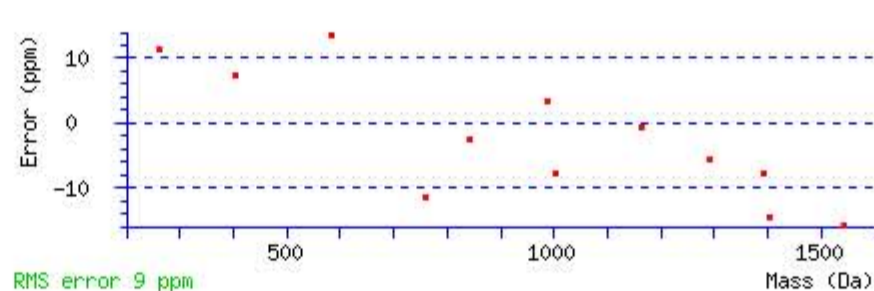

NCBI BLAST search of [AAFTECCQAADK](#)

(Parameters: blastp, nr protein database, expect=20000, no filter, PAM30)

Other BLAST [web gateways](#)

All matches to this query

| Score | Mr(calc):   | Delta     | Sequence                     |
|-------|-------------|-----------|------------------------------|
| 53.0  | 1681.726227 | -0.008025 | <a href="#">AAFTECCQAADK</a> |

Mascot: <http://www.matrixscience.com/>

# MASCOT SEARCH RESULTS

## Peptide View

MS/MS Fragmentation of **YICENQDSISSK**

Found in **ALBU\_HUMAN**, Serum albumin OS=Homo sapiens GN=ALB PE=1 SV=2

Match to Query 34725: 1753.789468 from(877.902010,2+) rtinseconds(1682) index(16999)

Title: Locus:1.1.1.3151.8 File:"2013-07-02 CLN FXIII 180 min 3rd F 2.wiff"

Data file C:\Program Files (x86)\Matrix Science\Mascot Daemon\mgf\9 FXIII 180 min 3rd\mascot\_daemon\_merge.mgf

Click mouse within plot area to zoom in by factor of two about that point

Or, Plot from  to  Da

Label all possible matches  Label matches used for scoring

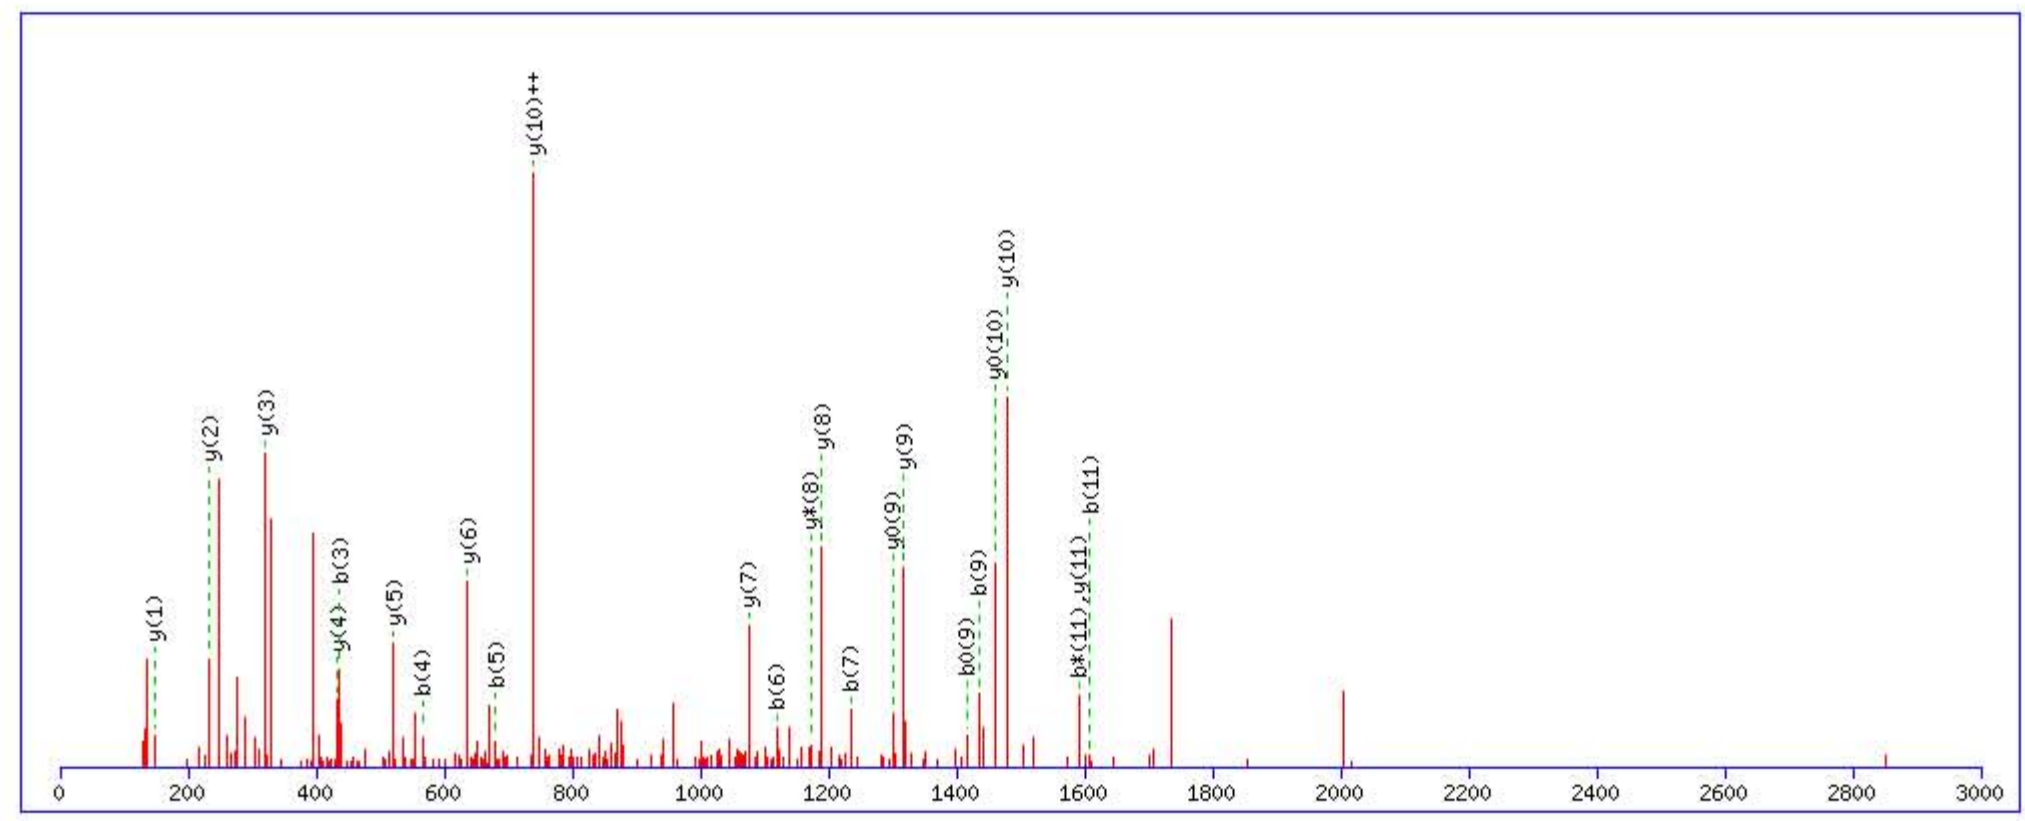

Monoisotopic mass of neutral peptide Mr(calc): 1753.801483

Fixed modifications: Carbamidomethyl (C) (apply to specified residues or termini only)

Variable modifications:

Q6 : Biotin:Thermo-21345 (Q)

Ions Score: 65 Expect: 1.7e-006

Matches : 24/116 fragment ions using 49 most intense peaks [\(help\)](#)

| #  | b           | b <sup>++</sup> | b <sup>*</sup> | b <sup>*++</sup> | b <sup>0</sup> | b <sup>0++</sup> | Seq. | y           | y <sup>++</sup> | y <sup>*</sup> | y <sup>*++</sup> | y <sup>0</sup> | y <sup>0++</sup> | #  |
|----|-------------|-----------------|----------------|------------------|----------------|------------------|------|-------------|-----------------|----------------|------------------|----------------|------------------|----|
| 1  | 164.070605  | 82.538940       |                |                  |                |                  | Y    |             |                 |                |                  |                |                  | 12 |
| 2  | 277.154669  | 139.080973      |                |                  |                |                  | I    | 1591.745454 | 796.376365      | 1574.718905    | 787.863091       | 1573.734889    | 787.371083       | 11 |
| 3  | 437.185318  | 219.096297      |                |                  |                |                  | C    | 1478.661390 | 739.834333      | 1461.634841    | 731.321059       | 1460.650825    | 730.829051       | 10 |
| 4  | 566.227911  | 283.617594      |                |                  | 548.217346     | 274.612311       | E    | 1318.630741 | 659.819009      | 1301.604192    | 651.305734       | 1300.620176    | 650.813726       | 9  |
| 5  | 680.270838  | 340.639057      | 663.244289     | 332.125783       | 662.260273     | 331.633775       | N    | 1189.588148 | 595.297712      | 1172.561599    | 586.784438       | 1171.577583    | 586.292430       | 8  |
| 6  | 1119.496164 | 560.251720      | 1102.469615    | 551.738446       | 1101.485599    | 551.246437       | Q    | 1075.545221 | 538.276249      | 1058.518672    | 529.762974       | 1057.534656    | 529.270966       | 7  |
| 7  | 1234.523107 | 617.765192      | 1217.496558    | 609.251917       | 1216.512542    | 608.759909       | D    | 636.319895  | 318.663586      | 619.293346     | 310.150311       | 618.309330     | 309.658303       | 6  |
| 8  | 1321.555135 | 661.281206      | 1304.528586    | 652.767931       | 1303.544570    | 652.275923       | S    | 521.292952  | 261.150114      | 504.266403     | 252.636840       | 503.282387     | 252.144832       | 5  |
| 9  | 1434.639199 | 717.823238      | 1417.612650    | 709.309963       | 1416.628634    | 708.817955       | I    | 434.260924  | 217.634100      | 417.234375     | 209.120826       | 416.250359     | 208.628818       | 4  |
| 10 | 1521.671227 | 761.339252      | 1504.644678    | 752.825977       | 1503.660662    | 752.333969       | S    | 321.176860  | 161.092068      | 304.150311     | 152.578794       | 303.166295     | 152.086786       | 3  |
| 11 | 1608.703255 | 804.855266      | 1591.676706    | 796.341991       | 1590.692690    | 795.849983       | S    | 234.144832  | 117.576054      | 217.118283     | 109.062780       | 216.134267     | 108.570772       | 2  |
| 12 |             |                 |                |                  |                |                  | K    | 147.112804  | 74.060040       | 130.086255     | 65.546765        |                |                  | 1  |

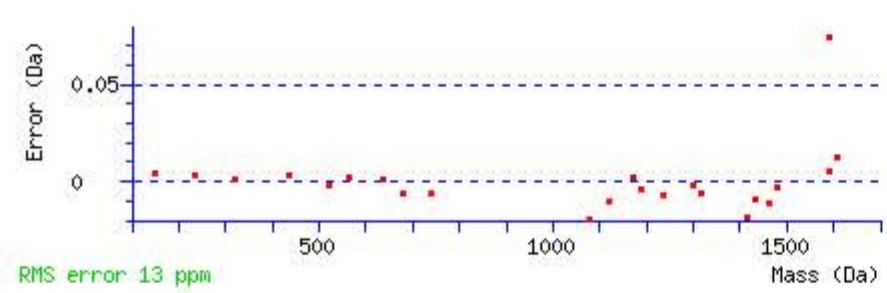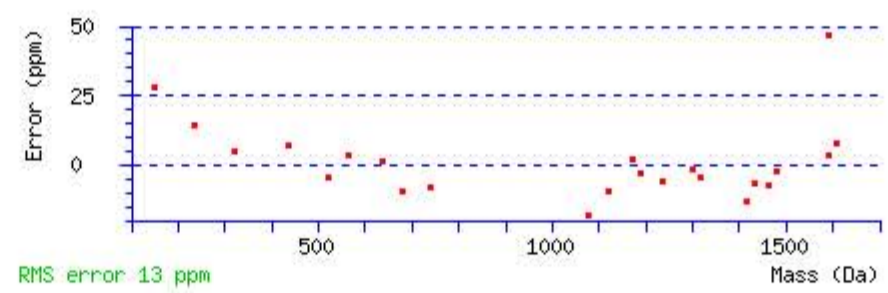

NCBI BLAST search of **YICENQDSISSK**

(Parameters: blastp, nr protein database, expect=20000, no filter, PAM30)

Other BLAST [web gateways](#)

All matches to this query

| Score | Mr(calc):   | Delta     | Sequence                         |
|-------|-------------|-----------|----------------------------------|
| 64.9  | 1753.801483 | -0.012015 | <a href="#">YICENQDSISSK</a>     |
| 3.1   | 1753.805496 | -0.016028 | <a href="#">EMFQTYKQMYLEK</a>    |
| 2.3   | 1753.778824 | 0.010644  | <a href="#">SKGESNQMNLDTASEK</a> |



# MASCOT SCIENCE Mascot Search Results

## Peptide View

MS/MS Fragmentation of **KVPQVSTPILVEVSR**

Found in **ALBU\_HUMAN**, Serum albumin OS=Homo sapiens GN=ALB PE=1 SV=2

Match to Query 38333: 1950.089322 from(651.037050,3+) rtinseconds(1957) index(31532)

Title: Locus:1.1.1.3345.12 File:"2013-07-02 CLN FXIII 180 min 3rd F 3.wiff"

Data file C:\Program Files (x86)\Matrix Science\Mascot Daemon\mgf\9 FXIII 180 min 3rd\mascot\_daemon\_merge.mgf

Click mouse within plot area to zoom in by factor of two about that point

Or, Plot from  to  Da

Label all possible matches  Label matches used for scoring

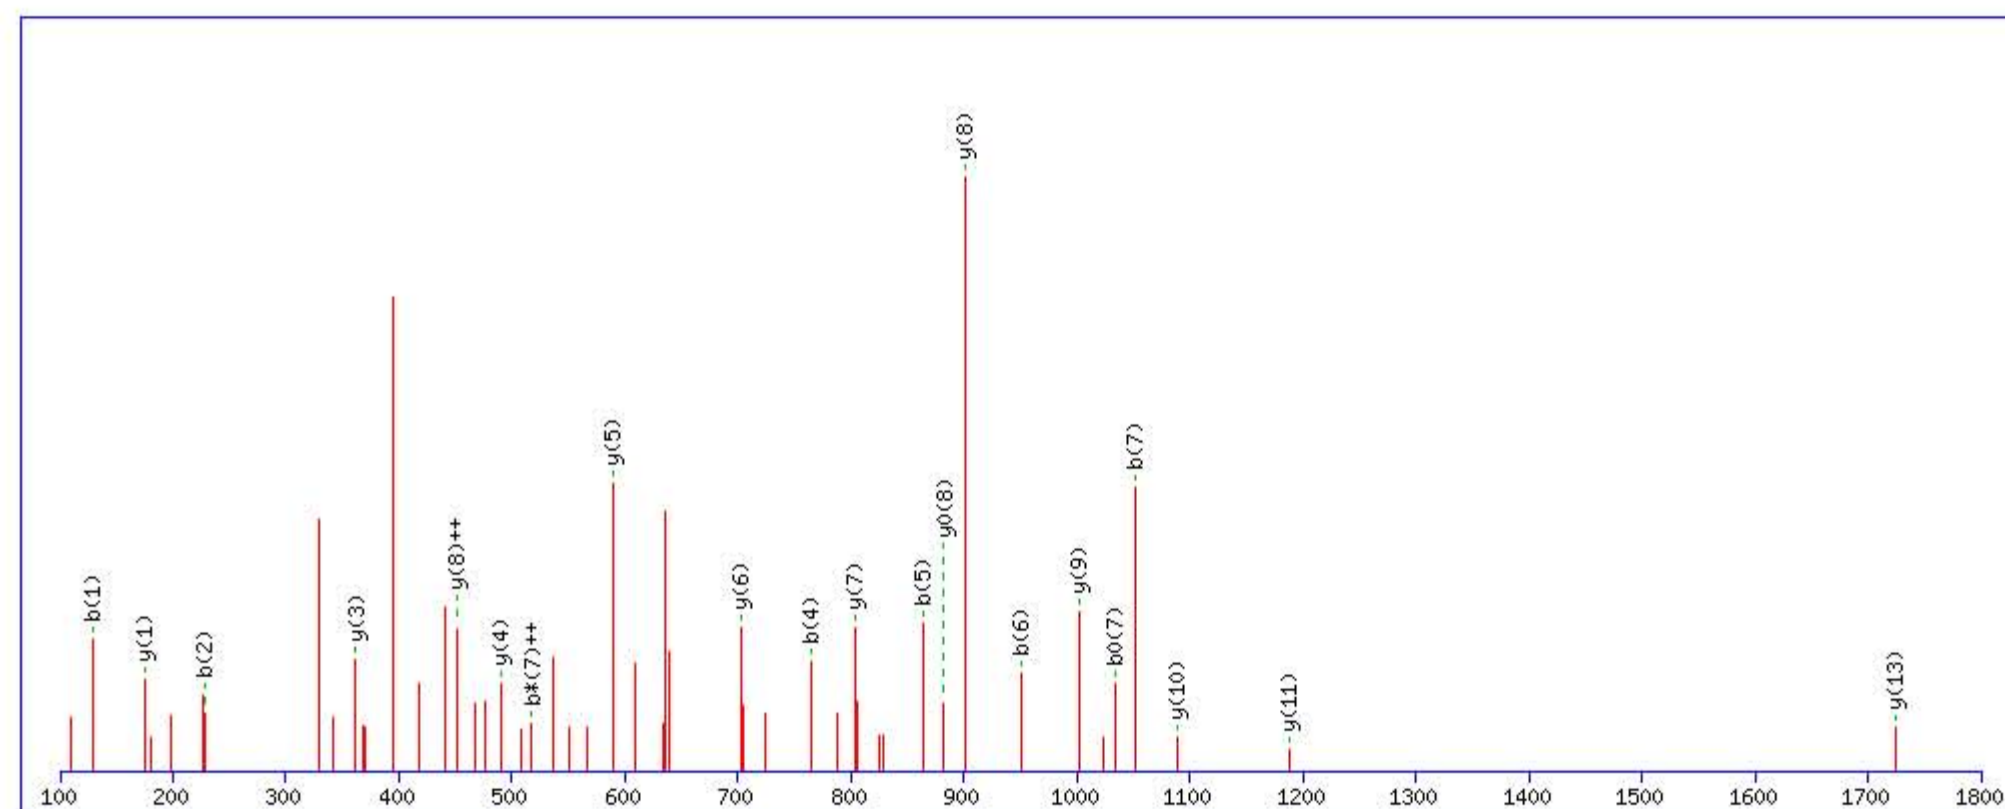

Monoisotopic mass of neutral peptide  $M_r(\text{calc})$ : 1950.097229

Fixed modifications: Carbamidomethyl (C) (apply to specified residues or termini only)

Variable modifications:

Q4 : Biotin:Thermo-21345 (Q)

Ions Score: 67 Expect:  $2.7e-006$

Matches : 21/156 fragment ions using 39 most intense peaks [\(help\)](#)

| #  | b                  | b <sup>++</sup> | b <sup>*</sup> | b <sup>*++</sup>  | b <sup>0</sup>     | b <sup>0++</sup> | Seq.     | y                  | y <sup>++</sup>   | y <sup>*</sup> | y <sup>*++</sup> | y <sup>0</sup>    | y <sup>0++</sup> | #         |
|----|--------------------|-----------------|----------------|-------------------|--------------------|------------------|----------|--------------------|-------------------|----------------|------------------|-------------------|------------------|-----------|
| 1  | <b>129.102239</b>  | 65.054757       | 112.075690     | 56.541483         |                    |                  | <b>K</b> |                    |                   |                |                  |                   |                  | <b>15</b> |
| 2  | <b>228.170653</b>  | 114.588965      | 211.144104     | 106.075690        |                    |                  | <b>V</b> | 1823.009533        | 912.008404        | 1805.982984    | 903.495130       | 1804.998968       | 903.003122       | <b>14</b> |
| 3  | 325.223417         | 163.115346      | 308.196868     | 154.602072        |                    |                  | <b>P</b> | <b>1723.941119</b> | 862.474197        | 1706.914570    | 853.960923       | 1705.930554       | 853.468915       | <b>13</b> |
| 4  | <b>764.448743</b>  | 382.728010      | 747.422194     | 374.214735        |                    |                  | <b>Q</b> | 1626.888355        | 813.947815        | 1609.861806    | 805.434541       | 1608.877790       | 804.942533       | <b>12</b> |
| 5  | <b>863.517157</b>  | 432.262217      | 846.490608     | 423.748942        |                    |                  | <b>V</b> | <b>1187.663029</b> | 594.335153        | 1170.636480    | 585.821878       | 1169.652464       | 585.329870       | <b>11</b> |
| 6  | <b>950.549185</b>  | 475.778231      | 933.522636     | 467.264956        | 932.538620         | 466.772948       | <b>S</b> | <b>1088.594615</b> | 544.800946        | 1071.568066    | 536.287671       | 1070.584050       | 535.795663       | <b>10</b> |
| 7  | <b>1051.596864</b> | 526.302070      | 1034.570315    | <b>517.788795</b> | <b>1033.586299</b> | 517.296787       | <b>T</b> | <b>1001.562587</b> | 501.284932        | 984.536038     | 492.771657       | 983.552022        | 492.279649       | <b>9</b>  |
| 8  | 1148.649628        | 574.828452      | 1131.623079    | 566.315178        | 1130.639063        | 565.823169       | <b>P</b> | <b>900.514908</b>  | <b>450.761092</b> | 883.488359     | 442.247818       | <b>882.504343</b> | 441.755810       | <b>8</b>  |
| 9  | 1249.697307        | 625.352291      | 1232.670758    | 616.839017        | 1231.686742        | 616.347009       | <b>T</b> | <b>803.462144</b>  | 402.234710        | 786.435595     | 393.721436       | 785.451579        | 393.229428       | <b>7</b>  |
| 10 | 1362.781371        | 681.894323      | 1345.754822    | 673.381049        | 1344.770806        | 672.889041       | <b>L</b> | <b>702.414465</b>  | 351.710871        | 685.387916     | 343.197596       | 684.403900        | 342.705588       | <b>6</b>  |
| 11 | 1461.849785        | 731.428530      | 1444.823236    | 722.915256        | 1443.839220        | 722.423248       | <b>V</b> | <b>589.330401</b>  | 295.168839        | 572.303852     | 286.655564       | 571.319836        | 286.163556       | <b>5</b>  |
| 12 | 1590.892378        | 795.949827      | 1573.865829    | 787.436552        | 1572.881813        | 786.944544       | <b>E</b> | <b>490.261987</b>  | 245.634631        | 473.235438     | 237.121357       | 472.251422        | 236.629349       | <b>4</b>  |
| 13 | 1689.960792        | 845.484034      | 1672.934243    | 836.970759        | 1671.950227        | 836.478751       | <b>V</b> | <b>361.219394</b>  | 181.113335        | 344.192845     | 172.600061       | 343.208829        | 172.108053       | <b>3</b>  |
| 14 | 1776.992820        | 889.000048      | 1759.966271    | 880.486774        | 1758.982255        | 879.994765       | <b>S</b> | 262.150980         | 131.579128        | 245.124431     | 123.065854       | 244.140415        | 122.573846       | <b>2</b>  |
| 15 |                    |                 |                |                   |                    |                  | <b>R</b> | <b>175.118952</b>  | 88.063114         | 158.092403     | 79.549839        |                   |                  | <b>1</b>  |

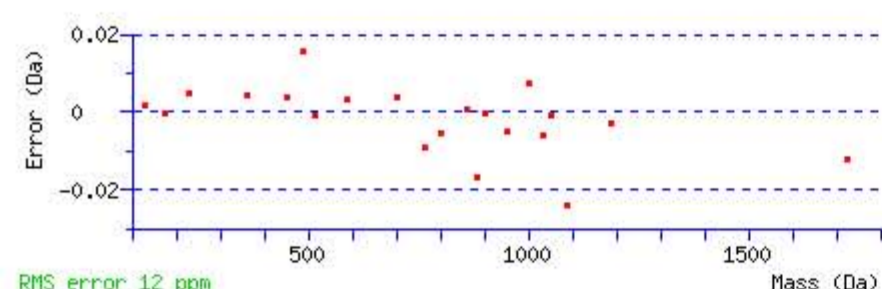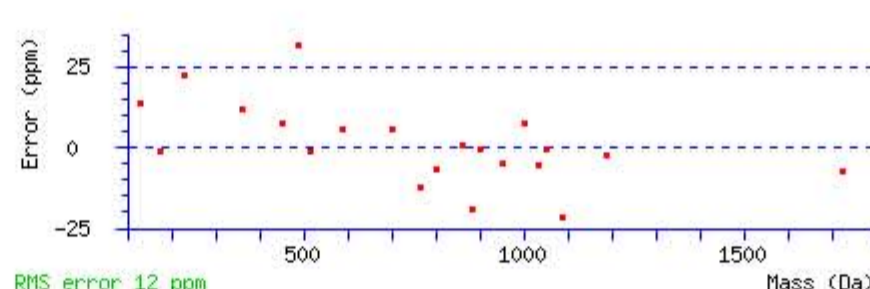

NCBI BLAST search of [KVPQVSTPILVEVSR](#)

(Parameters: blastp, nr protein database, expect=20000, no filter, PAM30)

Other BLAST [web gateways](#)

All matches to this query

| Score | $M_r(\text{calc})$ : | Delta     | Sequence                        |
|-------|----------------------|-----------|---------------------------------|
| 66.6  | 1950.097229          | -0.007907 | <a href="#">KVPQVSTPILVEVSR</a> |
| 9.7   | 1950.060791          | 0.028531  | <a href="#">QPITEAEMKGVKHEK</a> |
| 1.3   | 1950.065521          | 0.023801  | <a href="#">QAQTRVNLK</a>       |

Mascot: <http://www.matrixscience.com/>

# MASCOT Search Results

## Peptide View

MS/MS Fragmentation of **QNCELFEQLGEYK**

Found in **ALBU\_HUMAN**, Serum albumin OS=Homo sapiens GN=ALB PE=1 SV=2

Match to Query 38753: 1967.918202 from(656.980010,3+) rtinseconds(2410) index(21295)

Title: Locus:1.1.1.3405.4 File:"2013-07-02 CLN FXIII 180 min 3rd F 2.wiff"

Data file C:\Program Files (x86)\Matrix Science\Mascot Daemon\mgf9 FXIII 180 min 3rd\mascot\_daemon\_merge.mgf

Click mouse within plot area to zoom in by factor of two about that point

Or, Plot from  to  Da

Label all possible matches  Label matches used for scoring

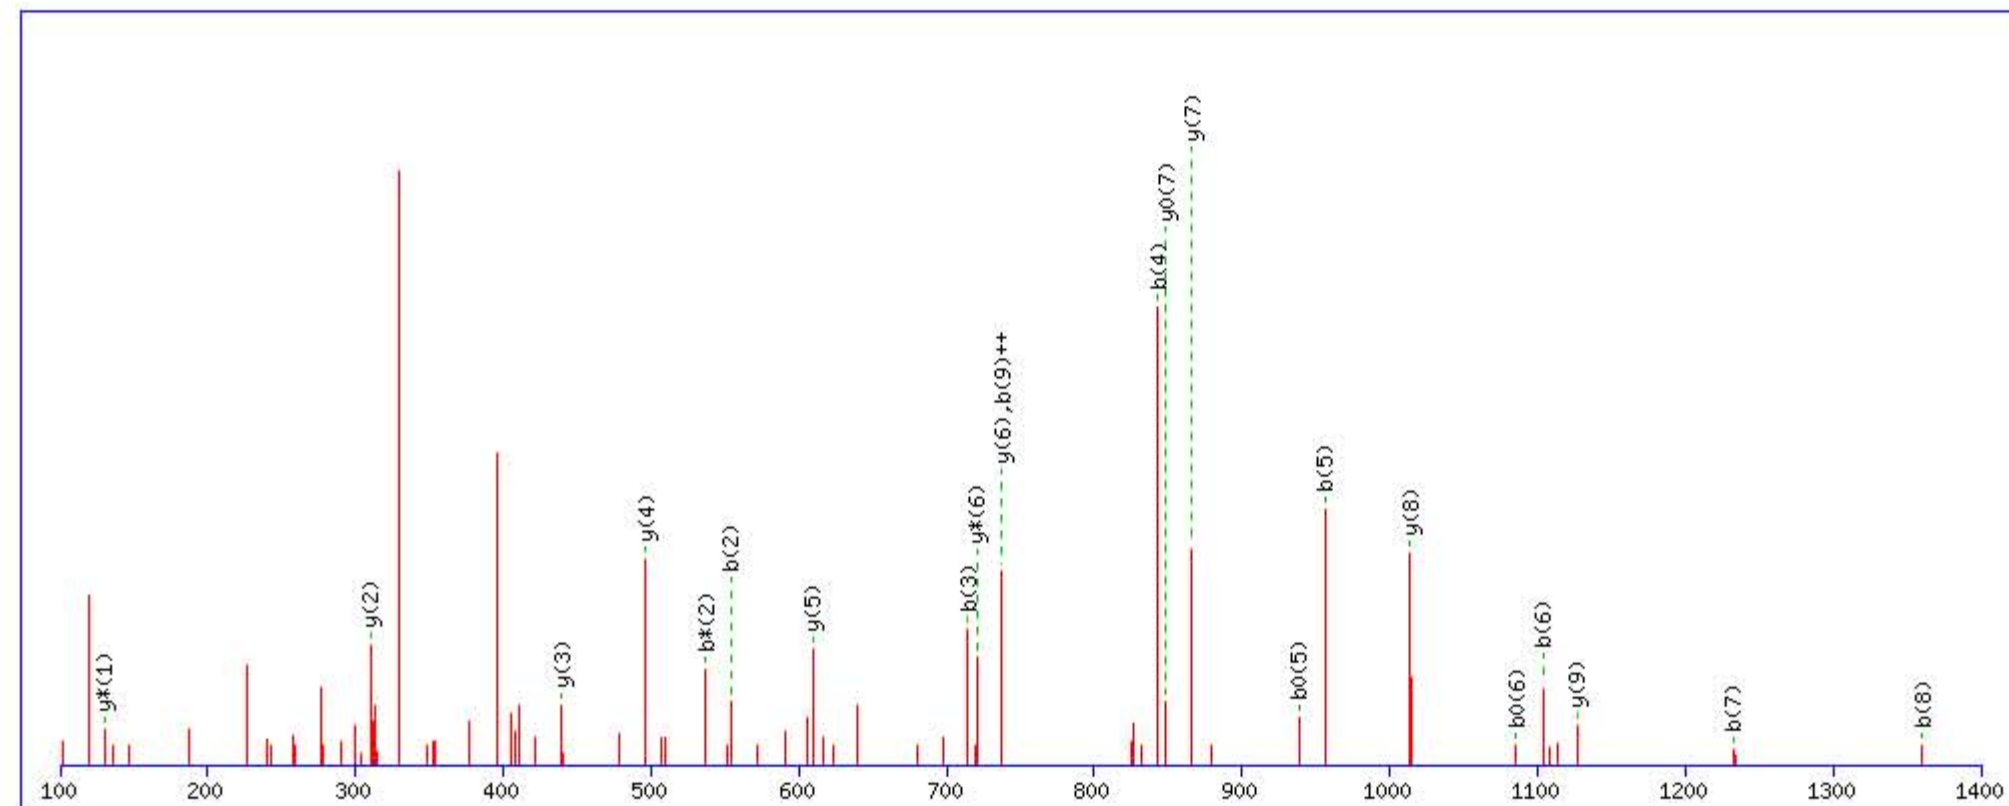

Monoisotopic mass of neutral peptide Mr(calc): 1967.912094

Fixed modifications: Carbamidomethyl (C) (apply to specified residues or termini only)

Variable modifications:

Q1 : Biotin:Thermo-21345 (Q)

Ions Score: 50 Expect: 2.5e-005

Matches : 22/134 fragment ions using 35 most intense peaks [\(help\)](#)

| #  | b                  | b <sup>++</sup>   | b <sup>*</sup>    | b <sup>*++</sup> | b <sup>0</sup>     | b <sup>0++</sup> | Seq. | y                  | y <sup>++</sup> | y <sup>*</sup>    | y <sup>*++</sup> | y <sup>0</sup>    | y <sup>0++</sup> | #  |
|----|--------------------|-------------------|-------------------|------------------|--------------------|------------------|------|--------------------|-----------------|-------------------|------------------|-------------------|------------------|----|
| 1  | 440.232602         | 220.619939        | 423.206053        | 212.106664       |                    |                  | Q    |                    |                 |                   |                  |                   |                  | 13 |
| 2  | <b>554.275529</b>  | 277.641403        | <b>537.248980</b> | 269.128128       |                    |                  | N    | 1529.694072        | 765.350674      | 1512.667523       | 756.837400       | 1511.683507       | 756.345392       | 12 |
| 3  | <b>714.306178</b>  | 357.656727        | 697.279629        | 349.143453       |                    |                  | C    | 1415.651145        | 708.329211      | 1398.624596       | 699.815936       | 1397.640580       | 699.323928       | 11 |
| 4  | <b>843.348771</b>  | 422.178024        | 826.322222        | 413.664749       | 825.338206         | 413.172741       | E    | 1255.620496        | 628.313886      | 1238.593947       | 619.800612       | 1237.609931       | 619.308604       | 10 |
| 5  | <b>956.432835</b>  | 478.720056        | 939.406286        | 470.206781       | <b>938.422270</b>  | 469.714773       | L    | <b>1126.577903</b> | 563.792590      | 1109.551354       | 555.279315       | 1108.567338       | 554.787307       | 9  |
| 6  | <b>1103.501249</b> | 552.254263        | 1086.474700       | 543.740988       | <b>1085.490684</b> | 543.248980       | F    | <b>1013.493839</b> | 507.250558      | 996.467290        | 498.737283       | 995.483274        | 498.245275       | 8  |
| 7  | <b>1232.543842</b> | 616.775559        | 1215.517293       | 608.262285       | 1214.533277        | 607.770277       | E    | <b>866.425425</b>  | 433.716351      | 849.398876        | 425.203076       | <b>848.414860</b> | 424.711068       | 7  |
| 8  | <b>1360.602420</b> | 680.804848        | 1343.575871       | 672.291574       | 1342.591855        | 671.799566       | Q    | <b>737.382832</b>  | 369.195054      | <b>720.356283</b> | 360.681780       | 719.372267        | 360.189772       | 6  |
| 9  | 1473.686484        | <b>737.346880</b> | 1456.659935       | 728.833606       | 1455.675919        | 728.341598       | L    | <b>609.324254</b>  | 305.165765      | 592.297705        | 296.652490       | 591.313689        | 296.160482       | 5  |
| 10 | 1530.707948        | 765.857612        | 1513.681399       | 757.344338       | 1512.697383        | 756.852330       | G    | <b>496.240190</b>  | 248.623733      | 479.213641        | 240.110458       | 478.229625        | 239.618450       | 4  |
| 11 | 1659.750541        | 830.378909        | 1642.723992       | 821.865634       | 1641.739976        | 821.373626       | E    | <b>439.218726</b>  | 220.113001      | 422.192177        | 211.599726       | 421.208161        | 211.107718       | 3  |
| 12 | 1822.813870        | 911.910573        | 1805.787321       | 903.397299       | 1804.803305        | 902.905291       | Y    | <b>310.176133</b>  | 155.591705      | 293.149584        | 147.078430       |                   |                  | 2  |
| 13 |                    |                   |                   |                  |                    |                  | K    | 147.112804         | 74.060040       | <b>130.086255</b> | 65.546765        |                   |                  | 1  |

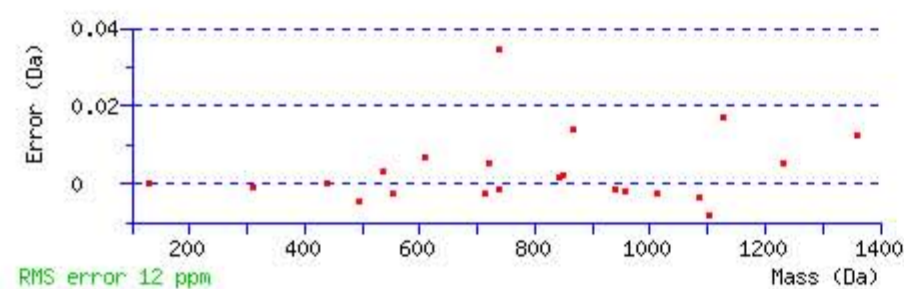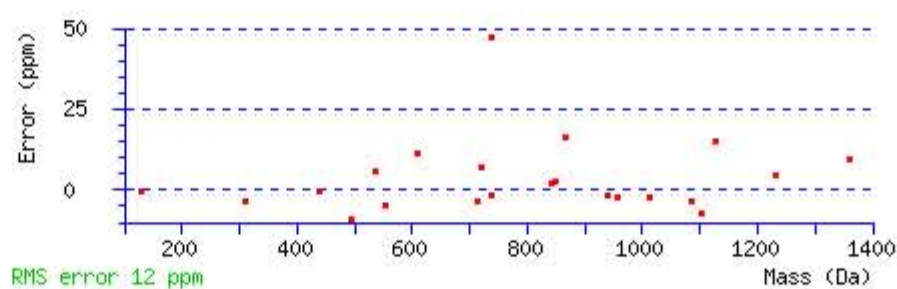

NCBI BLAST search of **QNCELFEQLGEYK**

(Parameters: blastp, nr protein database, expect=20000, no filter, PAM30)

Other BLAST [web gateways](#)

All matches to this query

| Score | Mr(calc):   | Delta     | Sequence                      |
|-------|-------------|-----------|-------------------------------|
| 50.2  | 1967.912094 | 0.006108  | <a href="#">QNCELFEQLGEYK</a> |
| 1.1   | 1967.930069 | -0.011867 | <a href="#">TQORMKEMESVMK</a> |
| 1.1   | 1967.930069 | -0.011867 | <a href="#">TQORMKEMESVMK</a> |

Mascot: <http://www.matrixscience.com/>

# MASCOT Search Results

## Peptide View

MS/MS Fragmentation of **VFDEFKPLVEEPQNLIK**  
 Found in **ALBU\_HUMAN**, Serum albumin OS=Homo sapiens GN=ALB PE=1 SV=2

Match to Query 45897: 2355.253782 from(786.091870,3+) rtinseconds(2628) index(35430)  
 Title: Locus:1.1.1.3578.17 File:"2013-07-02 CLN FXIII 180 min 3rd F 3.wiff"  
 Data file C:\Program Files (x86)\Matrix Science\Mascot Daemon\mgf\9 FXIII 180 min 3rd\mascot\_daemon\_merge.mgf

Click mouse within plot area to zoom in by factor of two about that point  
 Or, Plot from  to  Da   
 Label all possible matches  Label matches used for scoring

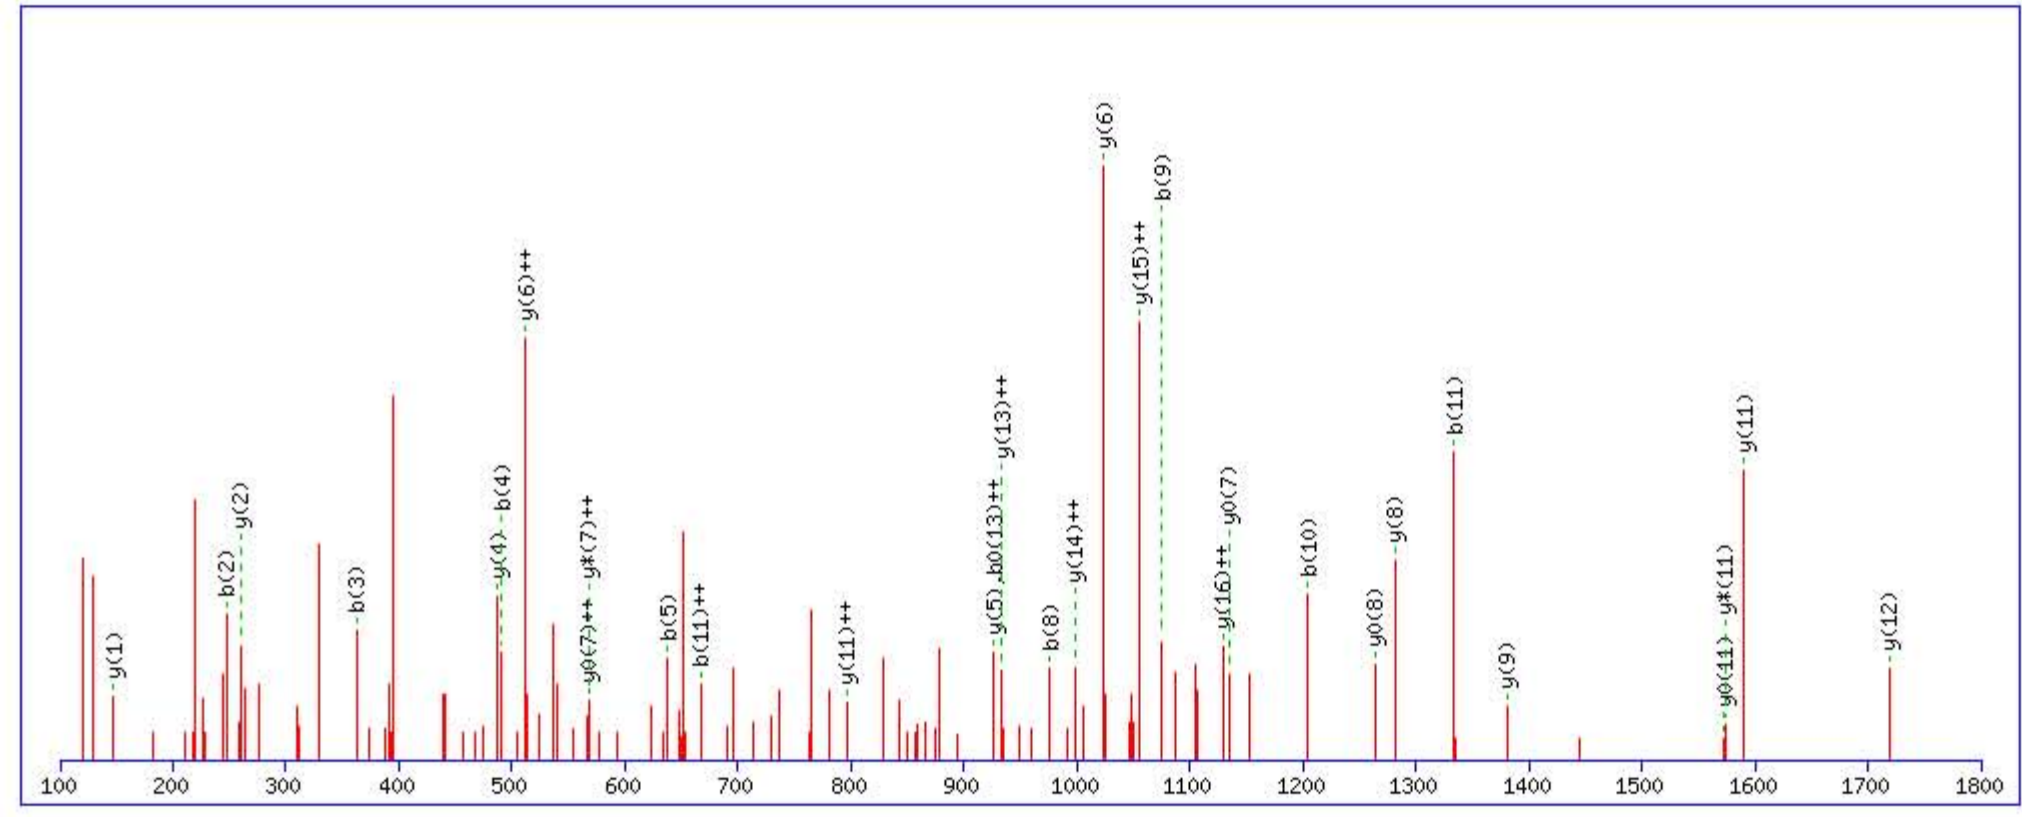

Monoisotopic mass of neutral peptide  $M_r(\text{calc})$ : 2355.254822  
 Fixed modifications: Carbamidomethyl (C) (apply to specified residues or termini only)  
 Variable modifications:  
 Q13 : Biotin:Thermo-21345 (Q)  
 Ions Score: 49 Expect: 0.0003  
 Matches : 31/166 fragment ions using 56 most intense peaks [\(help\)](#)

| #  | b                  | b <sup>++</sup>   | b <sup>*</sup> | b <sup>*++</sup> | b <sup>0</sup> | b <sup>0++</sup>  | Seq. | y                  | y <sup>++</sup>    | y <sup>*</sup>     | y <sup>*++</sup>  | y <sup>0</sup>     | y <sup>0++</sup>  | #  |
|----|--------------------|-------------------|----------------|------------------|----------------|-------------------|------|--------------------|--------------------|--------------------|-------------------|--------------------|-------------------|----|
| 1  | 100.075690         | 50.541483         |                |                  |                |                   | V    |                    |                    |                    |                   |                    |                   | 17 |
| 2  | <b>247.144104</b>  | 124.075690        |                |                  |                |                   | F    | 2257.193704        | <b>1129.100490</b> | 2240.167155        | 1120.587216       | 2239.183139        | 1120.095208       | 16 |
| 3  | <b>362.171047</b>  | 181.589161        |                |                  | 344.160482     | 172.583879        | D    | 2110.125290        | <b>1055.566283</b> | 2093.098741        | 1047.053008       | 2092.114725        | 1046.561000       | 15 |
| 4  | <b>491.213640</b>  | 246.110458        |                |                  | 473.203075     | 237.105176        | E    | 1995.098347        | <b>998.052812</b>  | 1978.071798        | 989.539537        | 1977.087782        | 989.047529        | 14 |
| 5  | <b>638.282054</b>  | 319.644665        |                |                  | 620.271489     | 310.639383        | F    | 1866.055754        | <b>933.531515</b>  | 1849.029205        | 925.018241        | 1848.045189        | 924.526233        | 13 |
| 6  | 766.377017         | 383.692147        | 749.350468     | 375.178872       | 748.366452     | 374.686864        | K    | <b>1718.987340</b> | 859.997308         | 1701.960791        | 851.484034        | 1700.976775        | 850.992026        | 12 |
| 7  | 863.429781         | 432.218529        | 846.403232     | 423.705254       | 845.419216     | 423.213246        | P    | <b>1590.892377</b> | <b>795.949827</b>  | <b>1573.865828</b> | 787.436552        | <b>1572.881812</b> | 786.944544        | 11 |
| 8  | <b>976.513845</b>  | 488.760561        | 959.487296     | 480.247286       | 958.503280     | 479.755278        | L    | 1493.839613        | 747.423445         | 1476.813064        | 738.910170        | 1475.829048        | 738.418162        | 10 |
| 9  | <b>1075.582259</b> | 538.294768        | 1058.555710    | 529.781493       | 1057.571694    | 529.289485        | V    | <b>1380.755549</b> | 690.881413         | 1363.729000        | 682.368138        | 1362.744984        | 681.876130        | 9  |
| 10 | <b>1204.624852</b> | 602.816064        | 1187.598303    | 594.302790       | 1186.614287    | 593.810782        | E    | <b>1281.687135</b> | 641.347206         | 1264.660586        | 632.833931        | <b>1263.676570</b> | 632.341923        | 8  |
| 11 | <b>1333.667445</b> | <b>667.337361</b> | 1316.640896    | 658.824086       | 1315.656880    | 658.332078        | E    | 1152.644542        | 576.825909         | 1135.617993        | <b>568.312635</b> | <b>1134.633977</b> | <b>567.820627</b> | 7  |
| 12 | 1430.720209        | 715.863743        | 1413.693660    | 707.350468       | 1412.709644    | 706.858460        | P    | <b>1023.601949</b> | <b>512.304613</b>  | 1006.575400        | 503.791338        |                    |                   | 6  |
| 13 | 1869.945535        | 935.476406        | 1852.918986    | 926.963131       | 1851.934970    | <b>926.471123</b> | Q    | <b>926.549185</b>  | 463.778231         | 909.522636         | 455.264956        |                    |                   | 5  |
| 14 | 1983.988462        | 992.497869        | 1966.961913    | 983.984595       | 1965.977897    | 983.492587        | N    | <b>487.323859</b>  | 244.165568         | 470.297310         | 235.652293        |                    |                   | 4  |
| 15 | 2097.072526        | 1049.039901       | 2080.045977    | 1040.526627      | 2079.061961    | 1040.034619       | L    | 373.280932         | 187.144104         | 356.254383         | 178.630830        |                    |                   | 3  |
| 16 | 2210.156590        | 1105.581933       | 2193.130041    | 1097.068659      | 2192.146025    | 1096.576651       | I    | <b>260.196868</b>  | 130.602072         | 243.170319         | 122.088798        |                    |                   | 2  |
| 17 |                    |                   |                |                  |                |                   | K    | <b>147.112804</b>  | 74.060040          | 130.086255         | 65.546765         |                    |                   | 1  |

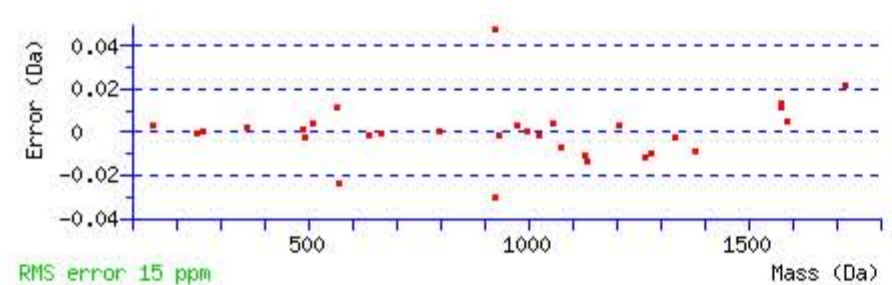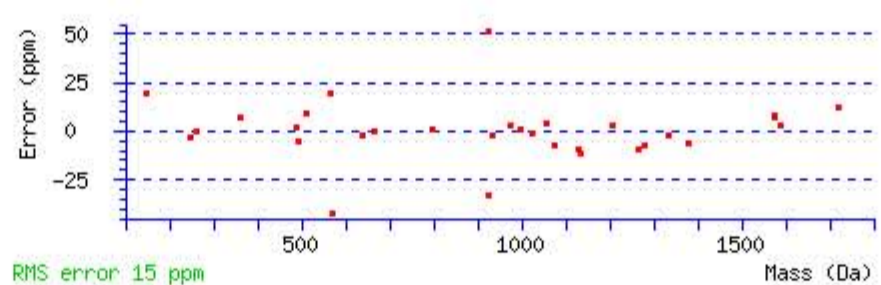

NCBI BLAST search of **VFDEFKPLVEEPQNLIK**  
 (Parameters: blastp, nr protein database, expect=20000, no filter, PAM30)  
 Other BLAST [web gateways](#)

### All matches to this query

| Score | $M_r(\text{calc})$ : | Delta     | Sequence                          |
|-------|----------------------|-----------|-----------------------------------|
| 49.4  | 2355.254822          | -0.001040 | <a href="#">VFDEFKPLVEEPQNLIK</a> |

**Peptide View**

MS/MS Fragmentation of **RMPCAEDYLSVVLNQLCVLHEK**  
 Found in **ALBU\_HUMAN**, Serum albumin OS=Homo sapiens GN=ALB PE=1 SV=2

Match to Query 53895: 2984.474256 from(747.125840,4+) rtinseconds(3096) index(38676)  
 Title: Locus:1.1.1.3738.15 File:"2013-07-02 CLN FXIII 180 min 3rd F 3.wiff"  
 Data file C:\Program Files (x86)\Matrix Science\Mascot Daemon\mgf\9 FXIII 180 min 3rd\mascot\_daemon\_merge.mgf

Click mouse within plot area to zoom in by factor of two about that point  
 Or, Plot from  to  Da   
 Label all possible matches  Label matches used for scoring

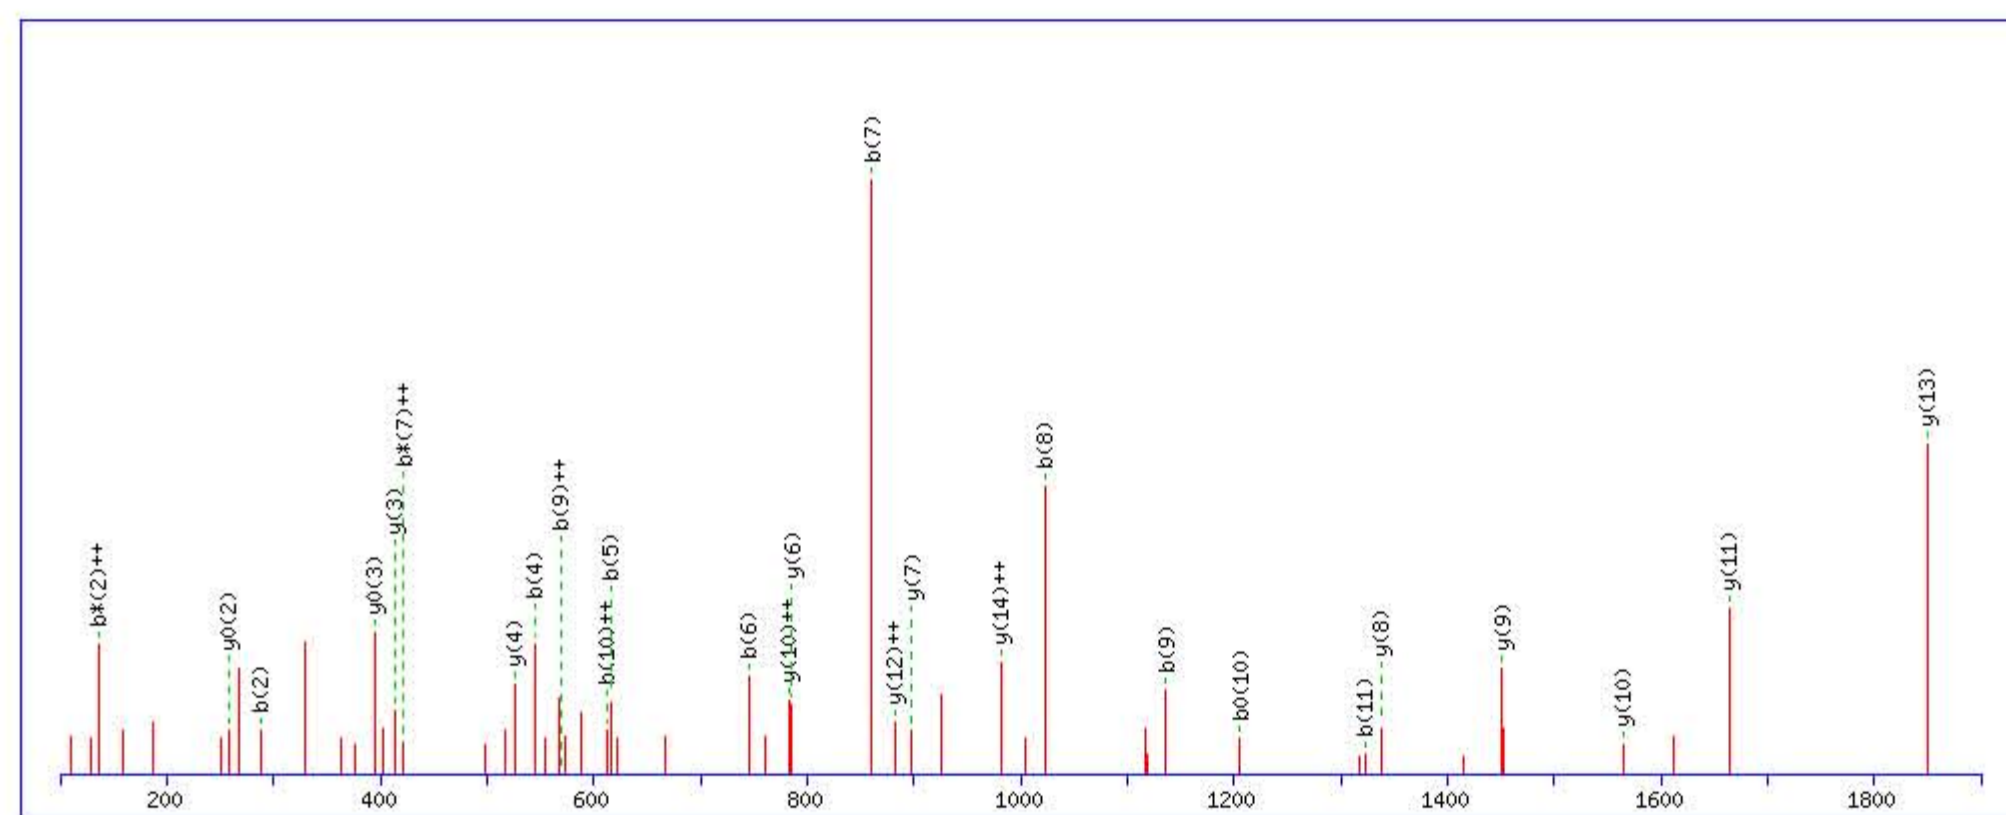

Monoisotopic mass of neutral peptide Mr(calc): 2984.474426  
 Fixed modifications: Carbamidomethyl (C) (apply to specified residues or termini only)  
 Variable modifications:  
 Q15 : Biotin:Thermo-21345 (Q)  
 Ions Score: 69 Expect: 1.1e-006  
 Matches : 27/240 fragment ions using 41 most intense peaks [\(help\)](#)

| #  | b                  | b <sup>++</sup>   | b <sup>*</sup> | b <sup>+++</sup>  | b <sup>0</sup>     | b <sup>0++</sup> | Seq. | y                  | y <sup>++</sup>   | y <sup>*</sup> | y <sup>+++</sup> | y <sup>0</sup>    | y <sup>0++</sup> | #  |
|----|--------------------|-------------------|----------------|-------------------|--------------------|------------------|------|--------------------|-------------------|----------------|------------------|-------------------|------------------|----|
| 1  | 157.108387         | 79.057831         | 140.081838     | 70.544557         |                    |                  | R    |                    |                   |                |                  |                   |                  | 22 |
| 2  | <b>288.148872</b>  | 144.578074        | 271.122323     | <b>136.064799</b> |                    |                  | M    | 2829.380614        | 1415.193945       | 2812.354065    | 1406.680670      | 2811.370049       | 1406.188662      | 21 |
| 3  | 385.201636         | 193.104456        | 368.175087     | 184.591181        |                    |                  | P    | 2698.340129        | 1349.673702       | 2681.313580    | 1341.160428      | 2680.329564       | 1340.668420      | 20 |
| 4  | <b>545.232285</b>  | 273.119781        | 528.205736     | 264.606506        |                    |                  | C    | 2601.287365        | 1301.147320       | 2584.260816    | 1292.634046      | 2583.276800       | 1292.142038      | 19 |
| 5  | <b>616.269399</b>  | 308.638338        | 599.242850     | 300.125063        |                    |                  | A    | 2441.256716        | 1221.131996       | 2424.230167    | 1212.618721      | 2423.246151       | 1212.126713      | 18 |
| 6  | <b>745.311992</b>  | 373.159634        | 728.285443     | 364.646360        | 727.301427         | 364.154352       | E    | 2370.219602        | 1185.613439       | 2353.193053    | 1177.100164      | 2352.209037       | 1176.608156      | 17 |
| 7  | <b>860.338935</b>  | 430.673106        | 843.312386     | <b>422.159831</b> | 842.328370         | 421.667823       | D    | 2241.177009        | 1121.092142       | 2224.150460    | 1112.578868      | 2223.166444       | 1112.086860      | 16 |
| 8  | <b>1023.402264</b> | 512.204770        | 1006.375715    | 503.691496        | 1005.391699        | 503.199488       | Y    | 2126.150066        | 1063.578671       | 2109.123517    | 1055.065396      | 2108.139501       | 1054.573388      | 15 |
| 9  | <b>1136.486328</b> | <b>568.746802</b> | 1119.459779    | 560.233528        | 1118.475763        | 559.741519       | L    | 1963.086737        | <b>982.047007</b> | 1946.060188    | 973.533732       | 1945.076172       | 973.041724       | 14 |
| 10 | 1223.518356        | <b>612.262816</b> | 1206.491807    | 603.749542        | <b>1205.507791</b> | 603.257534       | S    | <b>1850.002673</b> | 925.504975        | 1832.976124    | 916.991700       | 1831.992108       | 916.499692       | 13 |
| 11 | <b>1322.586770</b> | 661.797023        | 1305.560221    | 653.283749        | 1304.576205        | 652.791741       | V    | 1762.970645        | <b>881.988961</b> | 1745.944096    | 873.475686       | 1744.960080       | 872.983678       | 12 |
| 12 | 1421.655184        | 711.331230        | 1404.628635    | 702.817956        | 1403.644619        | 702.325948       | V    | <b>1663.902231</b> | 832.454754        | 1646.875682    | 823.941479       | 1645.891666       | 823.449471       | 11 |
| 13 | 1534.739248        | 767.873262        | 1517.712699    | 759.359988        | 1516.728683        | 758.867980       | L    | <b>1564.833817</b> | <b>782.920547</b> | 1547.807268    | 774.407272       | 1546.823252       | 773.915264       | 10 |
| 14 | 1648.782175        | 824.894726        | 1631.755626    | 816.381451        | 1630.771610        | 815.889443       | N    | <b>1451.749753</b> | 726.378515        | 1434.723204    | 717.865240       | 1433.739188       | 717.373232       | 9  |
| 15 | 2088.007501        | 1044.507388       | 2070.980952    | 1035.994114       | 2069.996936        | 1035.502106      | Q    | <b>1337.706826</b> | 669.357051        | 1320.680277    | 660.843777       | 1319.696261       | 660.351769       | 8  |
| 16 | 2201.091565        | 1101.049421       | 2184.065016    | 1092.536146       | 2183.081000        | 1092.044138      | L    | <b>898.481500</b>  | 449.744388        | 881.454951     | 441.231114       | 880.470935        | 440.739106       | 7  |
| 17 | 2361.122214        | 1181.064745       | 2344.095665    | 1172.551470       | 2343.111649        | 1172.059462      | C    | <b>785.397436</b>  | 393.202356        | 768.370887     | 384.689081       | 767.386871        | 384.197073       | 6  |
| 18 | 2460.190628        | 1230.598952       | 2443.164079    | 1222.085677       | 2442.180063        | 1221.593669      | V    | 625.366787         | 313.187032        | 608.340238     | 304.673757       | 607.356222        | 304.181749       | 5  |
| 19 | 2573.274692        | 1287.140984       | 2556.248143    | 1278.627709       | 2555.264127        | 1278.135701      | L    | <b>526.298373</b>  | 263.652825        | 509.271824     | 255.139550       | 508.287808        | 254.647542       | 4  |
| 20 | 2710.333604        | 1355.670440       | 2693.307055    | 1347.157165       | 2692.323039        | 1346.665157      | H    | <b>413.214309</b>  | 207.110793        | 396.187760     | 198.597518       | <b>395.203744</b> | 198.105510       | 3  |
| 21 | 2839.376197        | 1420.191736       | 2822.349648    | 1411.678462       | 2821.365632        | 1411.186454      | E    | 276.155397         | 138.581337        | 259.128848     | 130.068062       | <b>258.144832</b> | 129.576054       | 2  |
| 22 |                    |                   |                |                   |                    |                  | K    | 147.112804         | 74.060040         | 130.086255     | 65.546765        |                   |                  | 1  |

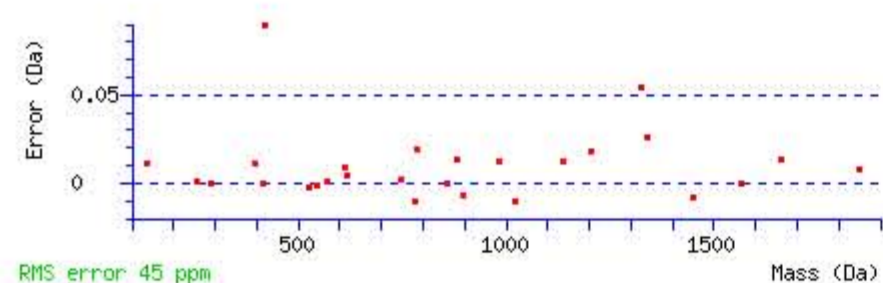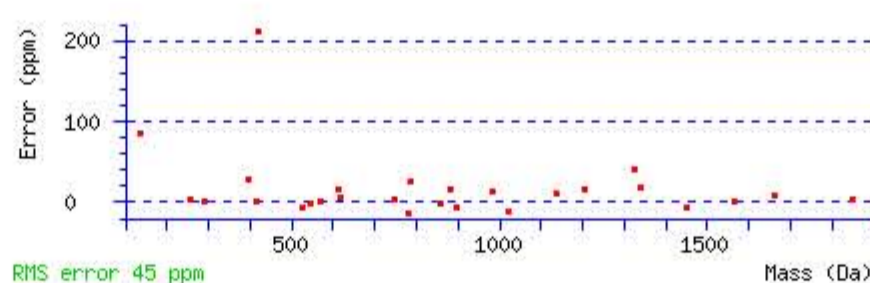

NCBI BLAST search of **RMPCAEDYLSVVLNQLCVLHEK**  
 (Parameters: blastp, nr protein database, expect=20000, no filter, PAM30)  
 Other BLAST [web gateways](#)

**All matches to this query**

| Score | Mr(calc):   | Delta     | Sequence                                   |
|-------|-------------|-----------|--------------------------------------------|
| 69.2  | 2984.474426 | -0.000170 | <a href="#">RMPCAEDYLSVVLNQLCVLHEK</a>     |
| 5.6   | 2984.466171 | 0.008085  | <a href="#">QQMNGLTSLDASTVYGSSPALERQLR</a> |

# MASCOT Search Results

## Peptide View

MS/MS Fragmentation of **NHQSSYQTR**

Found in **PON1\_HUMAN**, Serum paraoxonase/arylesterase 1 OS=Homo sapiens GN=PON1 PE=1 SV=3

Match to Query 25312: 1430.671092 from(477.897640,3+) rtinseconds(1211) index(27513)

Title: Locus:1.1.1.3084.7 File:"2013-07-02 CLN FXIII 180 min 3rd F 3.wiff"

Data file C:\Program Files (x86)\Matrix Science\Mascot Daemon\mgf\9 FXIII 180 min 3rd\mascot\_daemon\_merge.mgf

Click mouse within plot area to zoom in by factor of two about that point

Or, Plot from  to  Da

Label all possible matches  Label matches used for scoring

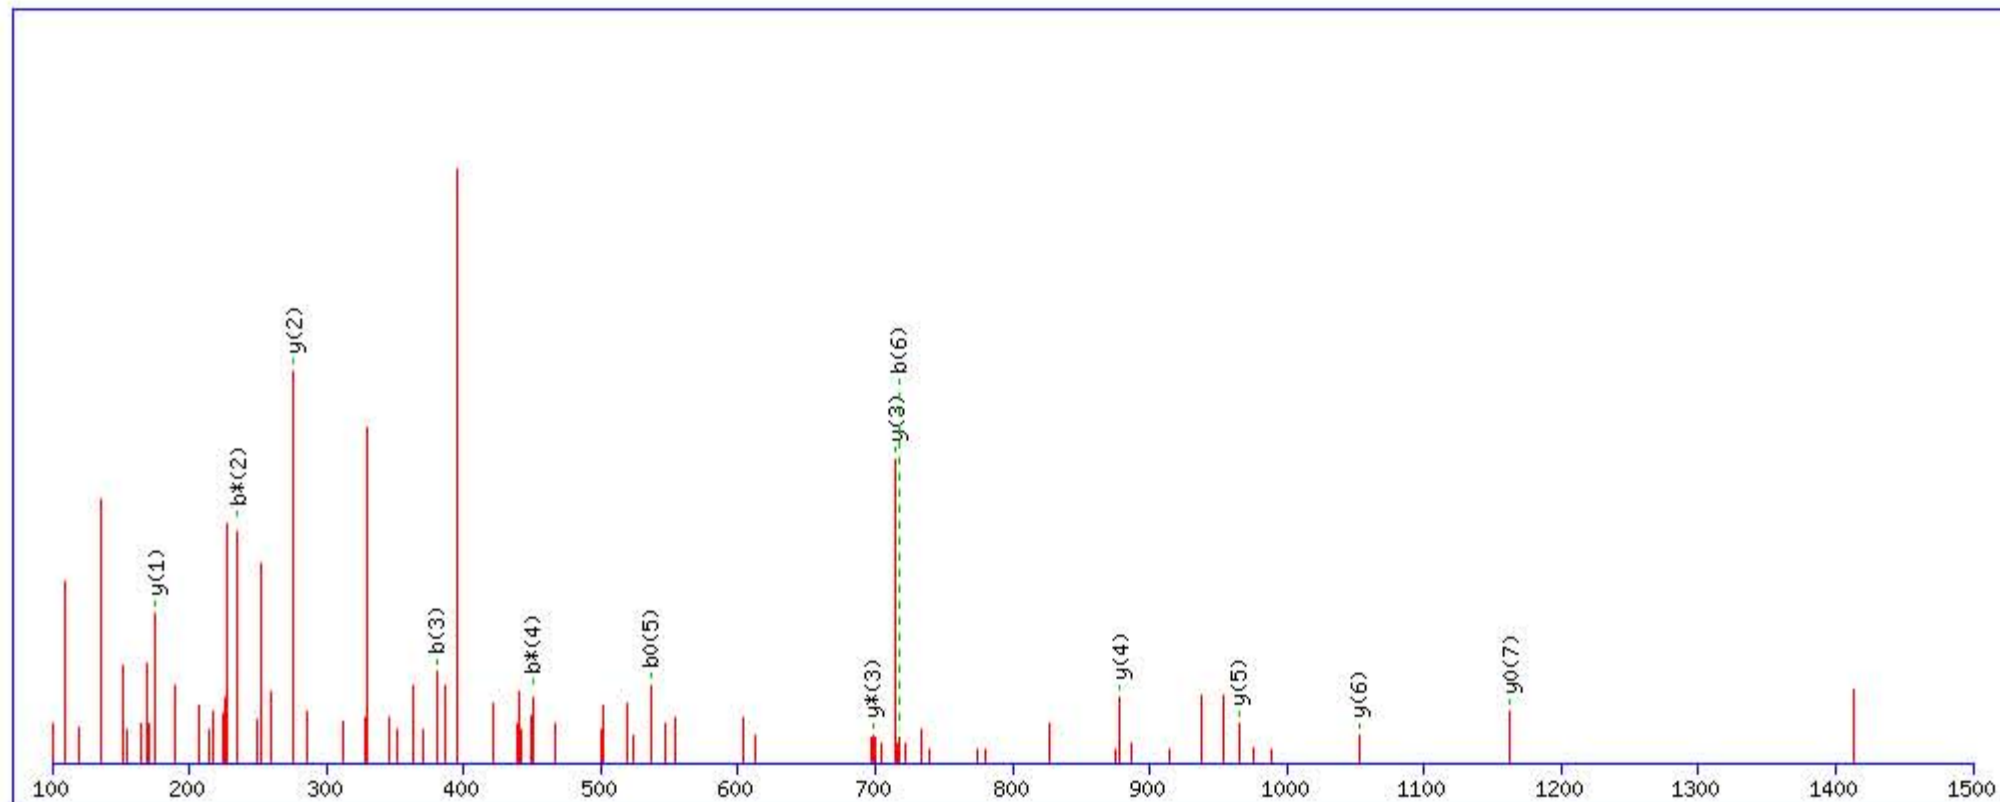

Monoisotopic mass of neutral peptide Mr(calc): 1430.672470

Fixed modifications: Carbamidomethyl (C) (apply to specified residues or termini only)

Variable modifications:

Q7 : Biotin:Thermo-21345 (Q)

Ions Score: 26 Expect: 0.0079

Matches : 13/88 fragment ions using 30 most intense peaks ([help](#))

| # | b           | b <sup>++</sup> | b <sup>*</sup> | b <sup>***</sup> | b <sup>0</sup> | b <sup>0++</sup> | Seq. | y           | y <sup>++</sup> | y <sup>*</sup> | y <sup>***</sup> | y <sup>0</sup> | y <sup>0++</sup> | # |
|---|-------------|-----------------|----------------|------------------|----------------|------------------|------|-------------|-----------------|----------------|------------------|----------------|------------------|---|
| 1 | 115.050203  | 58.028740       | 98.023654      | 49.515465        |                |                  | N    |             |                 |                |                  |                |                  | 9 |
| 2 | 252.109115  | 126.558195      | 235.082566     | 118.044921       |                |                  | H    | 1317.636832 | 659.322054      | 1300.610283    | 650.808780       | 1299.626267    | 650.316772       | 8 |
| 3 | 380.167693  | 190.587484      | 363.141144     | 182.074210       |                |                  | Q    | 1180.577920 | 590.792598      | 1163.551371    | 582.279324       | 1162.567355    | 581.787316       | 7 |
| 4 | 467.199721  | 234.103499      | 450.173172     | 225.590224       | 449.189156     | 225.098216       | S    | 1052.519342 | 526.763309      | 1035.492793    | 518.250035       | 1034.508777    | 517.758027       | 6 |
| 5 | 554.231749  | 277.619513      | 537.205200     | 269.106238       | 536.221184     | 268.614230       | S    | 965.487314  | 483.247295      | 948.460765     | 474.734021       | 947.476749     | 474.242013       | 5 |
| 6 | 717.295078  | 359.151177      | 700.268529     | 350.637903       | 699.284513     | 350.145895       | Y    | 878.455286  | 439.731281      | 861.428737     | 431.218007       | 860.444721     | 430.725999       | 4 |
| 7 | 1156.520404 | 578.763840      | 1139.493855    | 570.250566       | 1138.509839    | 569.758558       | Q    | 715.391957  | 358.199617      | 698.365408     | 349.686342       | 697.381392     | 349.194334       | 3 |
| 8 | 1257.568083 | 629.287680      | 1240.541534    | 620.774405       | 1239.557518    | 620.282397       | T    | 276.166631  | 138.586953      | 259.140082     | 130.073679       | 258.156066     | 129.581671       | 2 |
| 9 |             |                 |                |                  |                |                  | R    | 175.118952  | 88.063114       | 158.092403     | 79.549839        |                |                  | 1 |

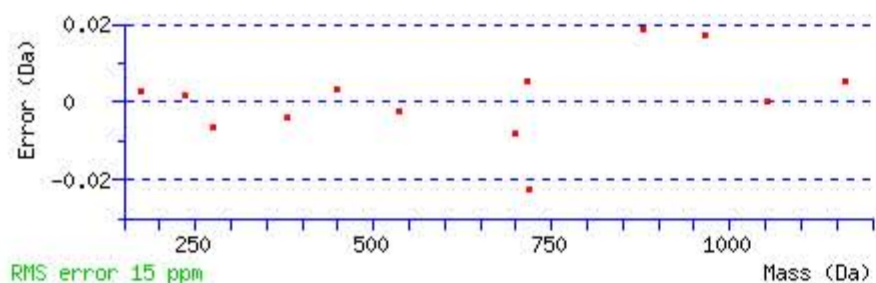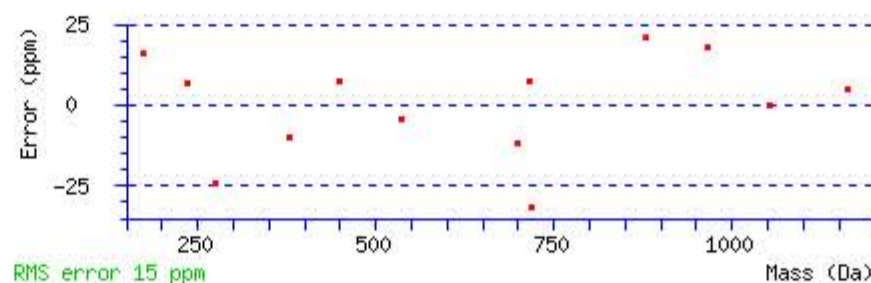

NCBI BLAST search of **NHQSSYQTR**

(Parameters: blastp, nr protein database, expect=20000, no filter, PAM30)

Other BLAST [web gateways](#)

All matches to this query

| Score | Mr(calc):   | Delta     | Sequence                     |
|-------|-------------|-----------|------------------------------|
| 25.6  | 1430.672470 | -0.001378 | <a href="#">NHQSSYQTR</a>    |
| 3.2   | 1430.686371 | -0.015279 | <a href="#">LICESLYASGYR</a> |

# MASCOT SCIENCE Mascot Search Results

## Peptide View

MS/MS Fragmentation of **IQNILTEEPK**

Found in **PON1\_HUMAN**, Serum paraoxonase/arylesterase 1 OS=Homo sapiens GN=PON1 PE=1 SV=3

Match to Query 27033: 1494.814468 from(748.414510,2+) rtinseconds(2065) index(46421)

Title: Locus:1.1.1.3431.12 File:"2013-07-02 CLN FXIII 180 min 3rd F 4.wiff"

Data file C:\Program Files (x86)\Matrix Science\Mascot Daemon\mgf\9 FXIII 180 min 3rd\mascot\_daemon\_merge.mgf

Click mouse within plot area to zoom in by factor of two about that point

Or, Plot from  to  Da

Label all possible matches  Label matches used for scoring

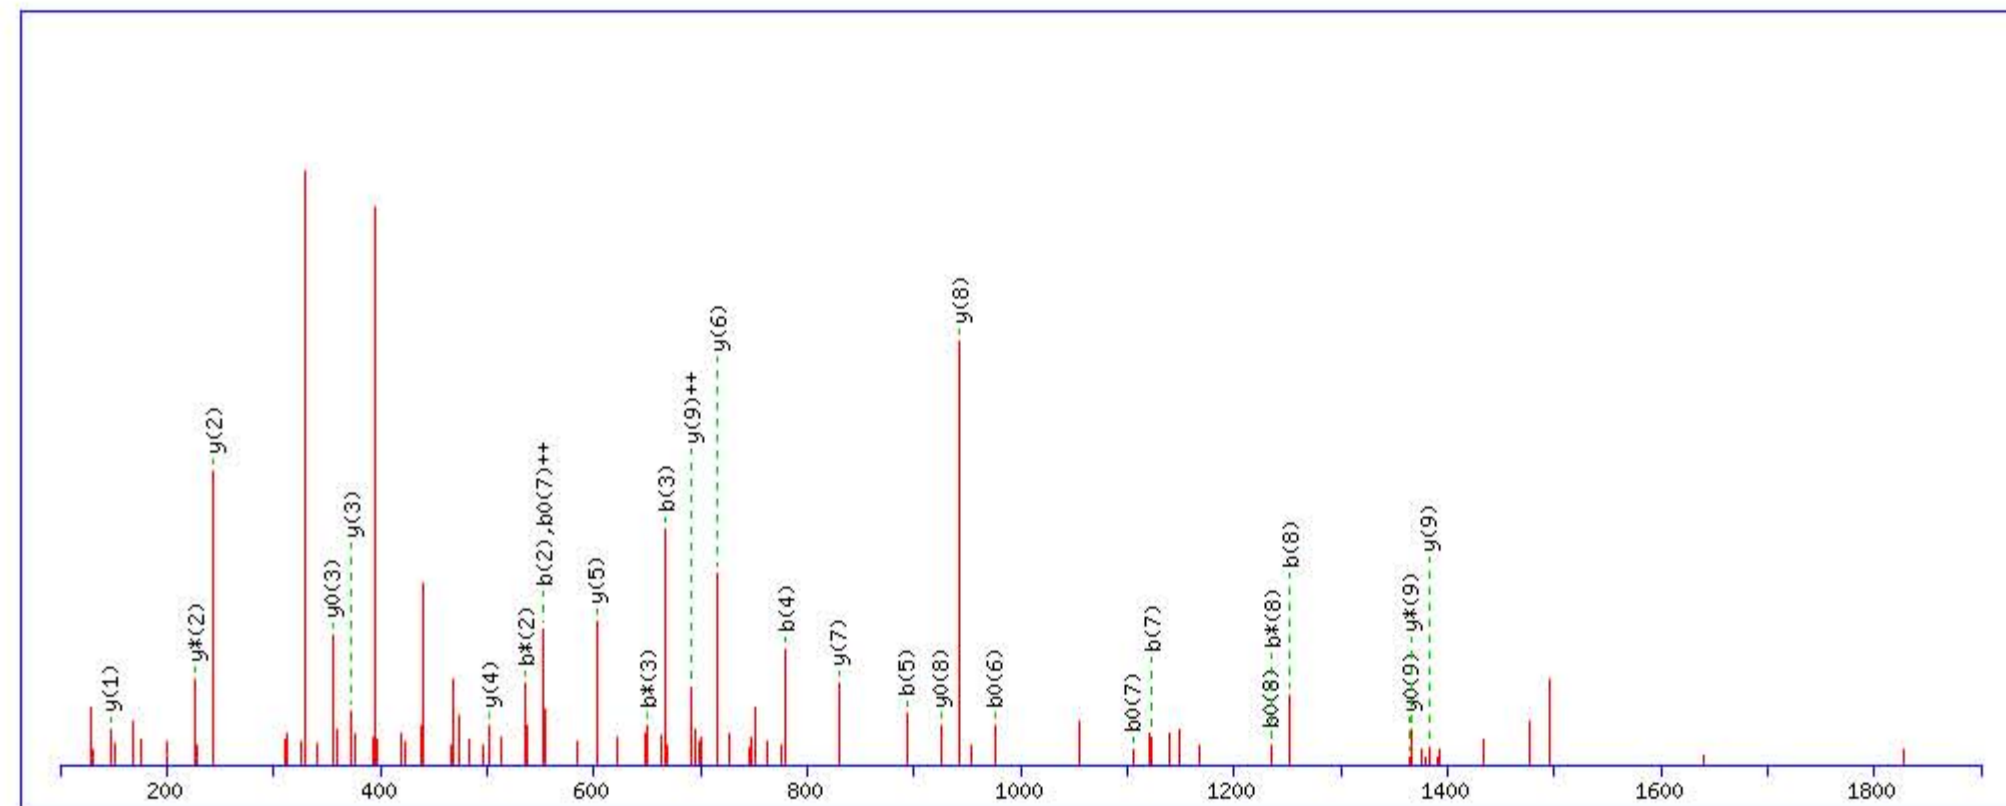

Monoisotopic mass of neutral peptide Mr(calc): 1494.811569

Fixed modifications: Carbamidomethyl (C) (apply to specified residues or termini only)

Variable modifications:

Q2 : Biotin:Thermo-21345 (Q)

Ions Score: 45 Expect: 0.00015

Matches : 28/92 fragment ions using 58 most intense peaks [\(help\)](#)

| #  | b                  | b <sup>++</sup> | b <sup>+</sup>     | b <sup>+++</sup> | b <sup>0</sup>     | b <sup>0++</sup>  | Seq. | y                  | y <sup>++</sup> | y <sup>+</sup>     | y <sup>+++</sup> | y <sup>0</sup>     | y <sup>0++</sup> | #  |
|----|--------------------|-----------------|--------------------|------------------|--------------------|-------------------|------|--------------------|-----------------|--------------------|------------------|--------------------|------------------|----|
| 1  | 114.091340         | 57.549308       |                    |                  |                    |                   | I    |                    |                 |                    |                  |                    |                  | 10 |
| 2  | <b>553.316666</b>  | 277.161971      | <b>536.290117</b>  | 268.648697       |                    |                   | Q    | <b>1382.734814</b> | 691.871045      | <b>1365.708265</b> | 683.357771       | <b>1364.724249</b> | 682.865763       | 9  |
| 3  | <b>667.359593</b>  | 334.183435      | <b>650.333044</b>  | 325.670160       |                    |                   | N    | <b>943.509488</b>  | 472.258382      | 926.482939         | 463.745108       | <b>925.498923</b>  | 463.253100       | 8  |
| 4  | <b>780.443657</b>  | 390.725467      | 763.417108         | 382.212192       |                    |                   | I    | <b>829.466561</b>  | 415.236919      | 812.440012         | 406.723644       | 811.455996         | 406.231636       | 7  |
| 5  | <b>893.527721</b>  | 447.267499      | 876.501172         | 438.754224       |                    |                   | L    | <b>716.382497</b>  | 358.694887      | 699.355948         | 350.181612       | 698.371932         | 349.689604       | 6  |
| 6  | 994.575400         | 497.791338      | 977.548851         | 489.278064       | <b>976.564835</b>  | 488.786056        | T    | <b>603.298433</b>  | 302.152855      | 586.271884         | 293.639580       | 585.287868         | 293.147572       | 5  |
| 7  | <b>1123.617993</b> | 562.312635      | 1106.591444        | 553.799360       | <b>1105.607428</b> | <b>553.307352</b> | E    | <b>502.250754</b>  | 251.629015      | 485.224205         | 243.115741       | 484.240189         | 242.623733       | 4  |
| 8  | <b>1252.660586</b> | 626.833931      | <b>1235.634037</b> | 618.320657       | <b>1234.650021</b> | 617.828649        | E    | <b>373.208161</b>  | 187.107719      | 356.181612         | 178.594444       | <b>355.197596</b>  | 178.102436       | 3  |
| 9  | 1349.713350        | 675.360313      | 1332.686801        | 666.847039       | 1331.702785        | 666.355031        | P    | <b>244.165568</b>  | 122.586422      | <b>227.139019</b>  | 114.073148       |                    |                  | 2  |
| 10 |                    |                 |                    |                  |                    |                   | K    | <b>147.112804</b>  | 74.060040       | 130.086255         | 65.546765        |                    |                  | 1  |

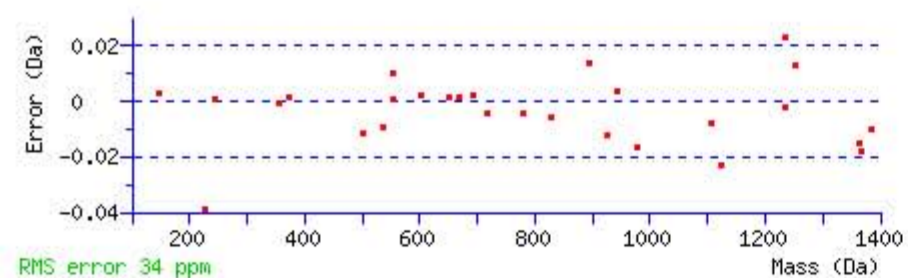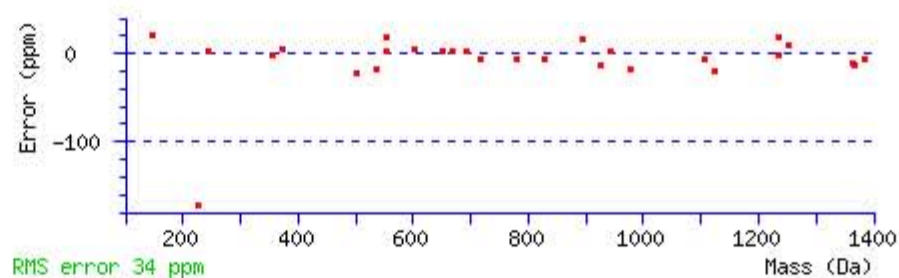

NCBI BLAST search of **IQNILTEEPK**

(Parameters: blastp, nr protein database, expect=20000, no filter, PAM30)

Other BLAST [web gateways](#)

## All matches to this query

| Score | Mr(calc):   | Delta     | Sequence                       |
|-------|-------------|-----------|--------------------------------|
| 44.7  | 1494.811569 | 0.002899  | <a href="#">IQNILTEEPK</a>     |
| 3.8   | 1494.809097 | 0.005371  | <a href="#">LQLYVFVMR</a>      |
| 3.7   | 1494.805054 | 0.009414  | <a href="#">KSIPLKMCYVTR</a>   |
| 3.0   | 1494.815430 | -0.000962 | <a href="#">KGSTKDSGHLQIPK</a> |
| 2.6   | 1494.797668 | 0.016800  | <a href="#">KMTHTAASPALPR</a>  |
| 1.9   | 1494.834030 | -0.019562 | <a href="#">QLNAIRDNIK</a>     |

# MASCOT SCIENCE Mascot Search Results

## Peptide View

MS/MS Fragmentation of **NHQSSYQTR**

Found in **PON1\_HUMAN**, Serum paraoxonase/arylesterase 1 OS=Homo sapiens GN=PON1 PE=1 SV=3

Match to Query 34407: 1741.833222 from(581.618350,3+) rtinseconds(1606) index(43539)

Title: Locus:1.1.1.3272.8 File:"2013-07-02 CLN FXIII 180 min 3rd F 4.wiff"

Data file C:\Program Files (x86)\Matrix Science\Mascot Daemon\mgf\9 FXIII 180 min 3rd\mascot\_daemon\_merge.mgf

Click mouse within plot area to zoom in by factor of two about that point

Or, Plot from  to  Da

Label all possible matches  Label matches used for scoring

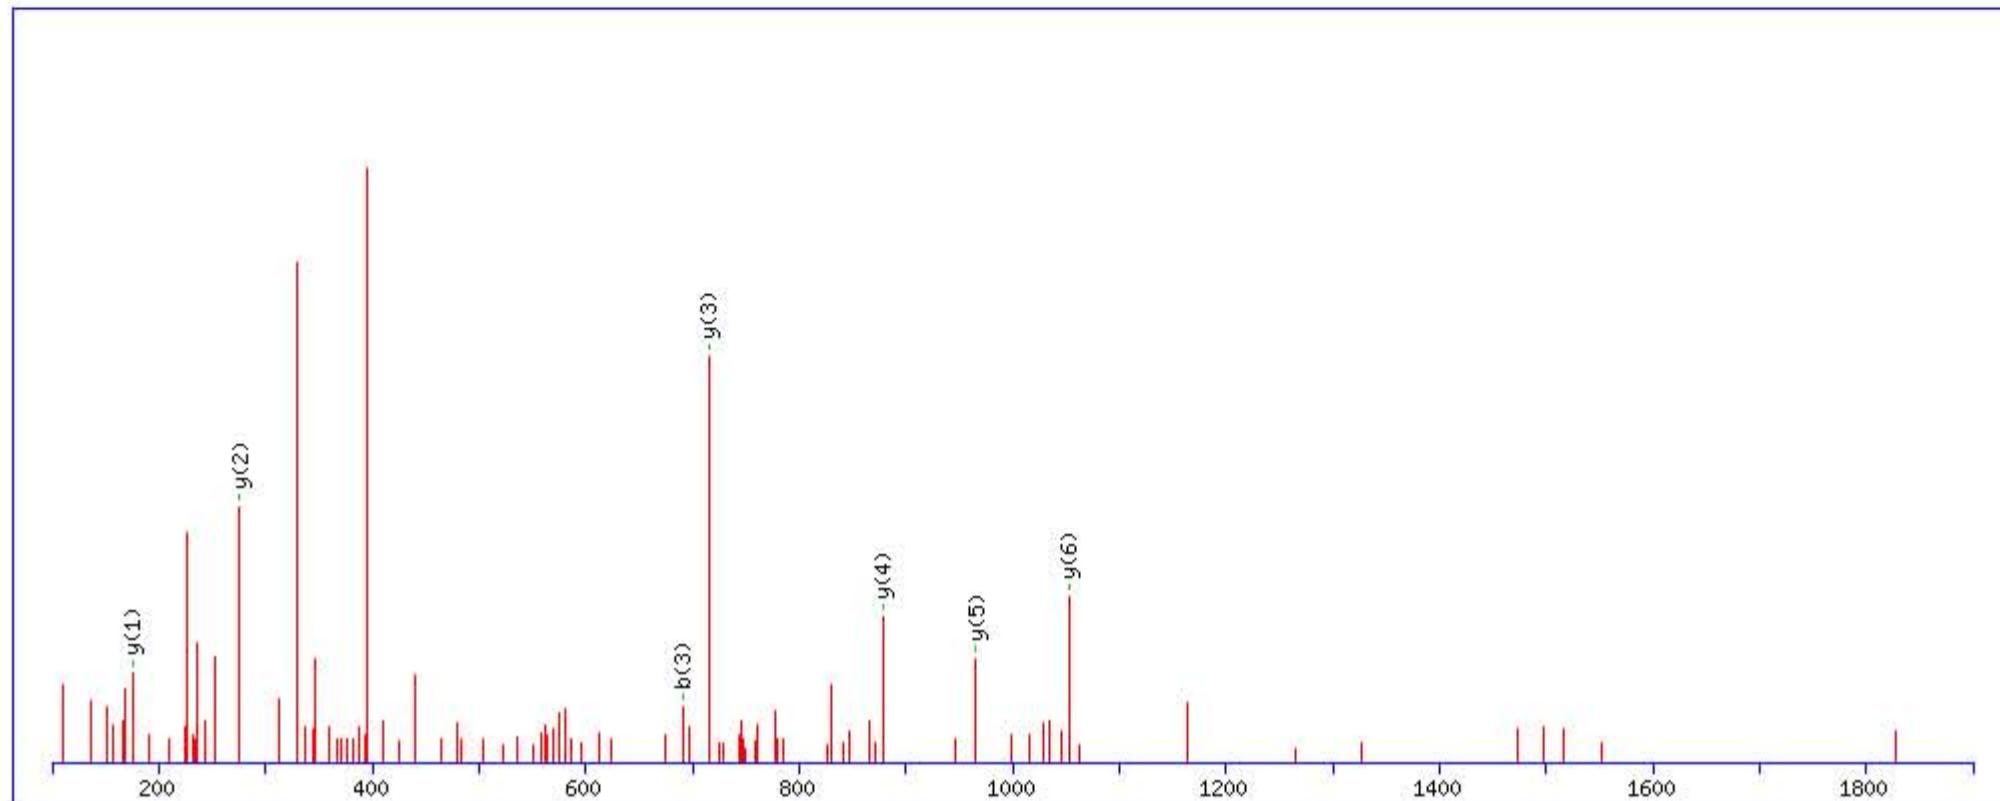

Monoisotopic mass of neutral peptide Mr(calc): 1741.839218

Fixed modifications: Carbamidomethyl (C) (apply to specified residues or termini only)

Variable modifications:

Q3 : Biotin:Thermo-21345 (Q)

Q7 : Biotin:Thermo-21345 (Q)

Ions Score: 26 Expect: 0.049

Matches : 7/88 fragment ions using 15 most intense peaks [\(help\)](#)

| # | b                 | b <sup>++</sup> | b <sup>*</sup> | b <sup>***</sup> | b <sup>0</sup> | b <sup>0++</sup> | Seq. | y                  | y <sup>++</sup> | y <sup>*</sup> | y <sup>***</sup> | y <sup>0</sup> | y <sup>0++</sup> | # |
|---|-------------------|-----------------|----------------|------------------|----------------|------------------|------|--------------------|-----------------|----------------|------------------|----------------|------------------|---|
| 1 | 115.050203        | 58.028740       | 98.023654      | 49.515465        |                |                  | N    |                    |                 |                |                  |                |                  | 9 |
| 2 | 252.109115        | 126.558195      | 235.082566     | 118.044921       |                |                  | H    | 1628.803580        | 814.905428      | 1611.777031    | 806.392154       | 1610.793015    | 805.900146       | 8 |
| 3 | <b>691.334441</b> | 346.170859      | 674.307892     | 337.657584       |                |                  | Q    | 1491.744668        | 746.375972      | 1474.718119    | 737.862698       | 1473.734103    | 737.370690       | 7 |
| 4 | 778.366469        | 389.686872      | 761.339920     | 381.173598       | 760.355904     | 380.681590       | S    | <b>1052.519342</b> | 526.763309      | 1035.492793    | 518.250035       | 1034.508777    | 517.758027       | 6 |
| 5 | 865.398497        | 433.202886      | 848.371948     | 424.689612       | 847.387932     | 424.197604       | S    | <b>965.487314</b>  | 483.247295      | 948.460765     | 474.734021       | 947.476749     | 474.242013       | 5 |
| 6 | 1028.461826       | 514.734551      | 1011.435277    | 506.221276       | 1010.451261    | 505.729268       | Y    | <b>878.455286</b>  | 439.731281      | 861.428737     | 431.218007       | 860.444721     | 430.725999       | 4 |
| 7 | 1467.687152       | 734.347214      | 1450.660603    | 725.833940       | 1449.676587    | 725.341932       | Q    | <b>715.391957</b>  | 358.199617      | 698.365408     | 349.686342       | 697.381392     | 349.194334       | 3 |
| 8 | 1568.734831       | 784.871054      | 1551.708282    | 776.357779       | 1550.724266    | 775.865771       | T    | <b>276.166631</b>  | 138.586953      | 259.140082     | 130.073679       | 258.156066     | 129.581671       | 2 |
| 9 |                   |                 |                |                  |                |                  | R    | <b>175.118952</b>  | 88.063114       | 158.092403     | 79.549839        |                |                  | 1 |

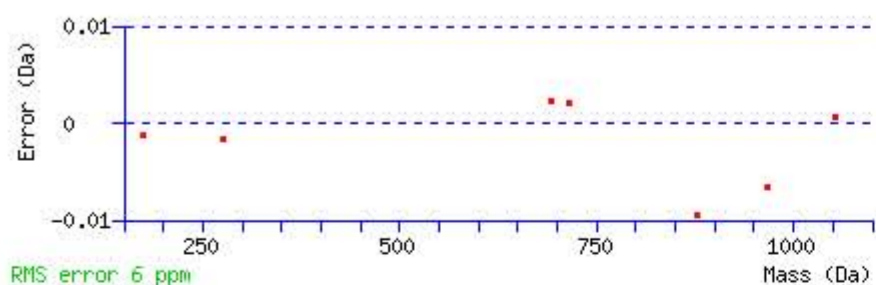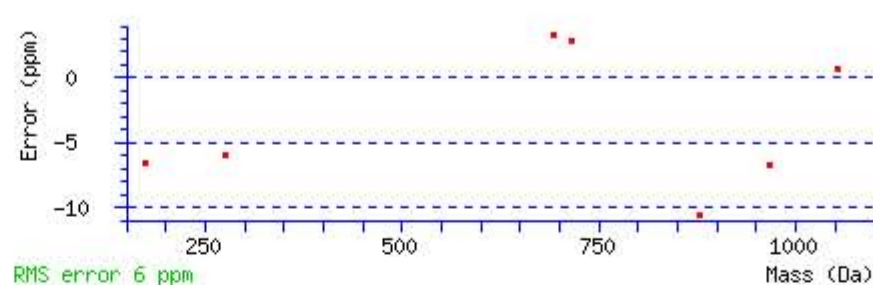

NCBI BLAST search of [NHQSSYQTR](#)

(Parameters: blastp, nr protein database, expect=20000, no filter, PAM30)

Other BLAST [web gateways](#)

### All matches to this query

| Score | Mr(calc):   | Delta     | Sequence                  |
|-------|-------------|-----------|---------------------------|
| 25.6  | 1741.839218 | -0.005996 | <a href="#">NHQSSYQTR</a> |

Mascot: <http://www.matrixscience.com/>

# MASCOT Search Results

## Peptide View

MS/MS Fragmentation of **QAEISASAPTSLR**

Found in **SHBG\_HUMAN**, Sex hormone-binding globulin OS=Homo sapiens GN=SHBG PE=1 SV=2

Match to Query 32544: 1640.864388 from(821.439470,2+) rtinseconds(1926) index(4360)

Title: Locus:1.1.1.3190.16 File:"2013-07-02 CLN FXIII 180 min 3rd F 1.wiff"

Data file C:\Program Files (x86)\Matrix Science\Mascot Daemon\mgf9 FXIII 180 min 3rd\mascot\_daemon\_merge.mgf

Click mouse within plot area to zoom in by factor of two about that point

Or, Plot from  to  Da

Label all possible matches  Label matches used for scoring

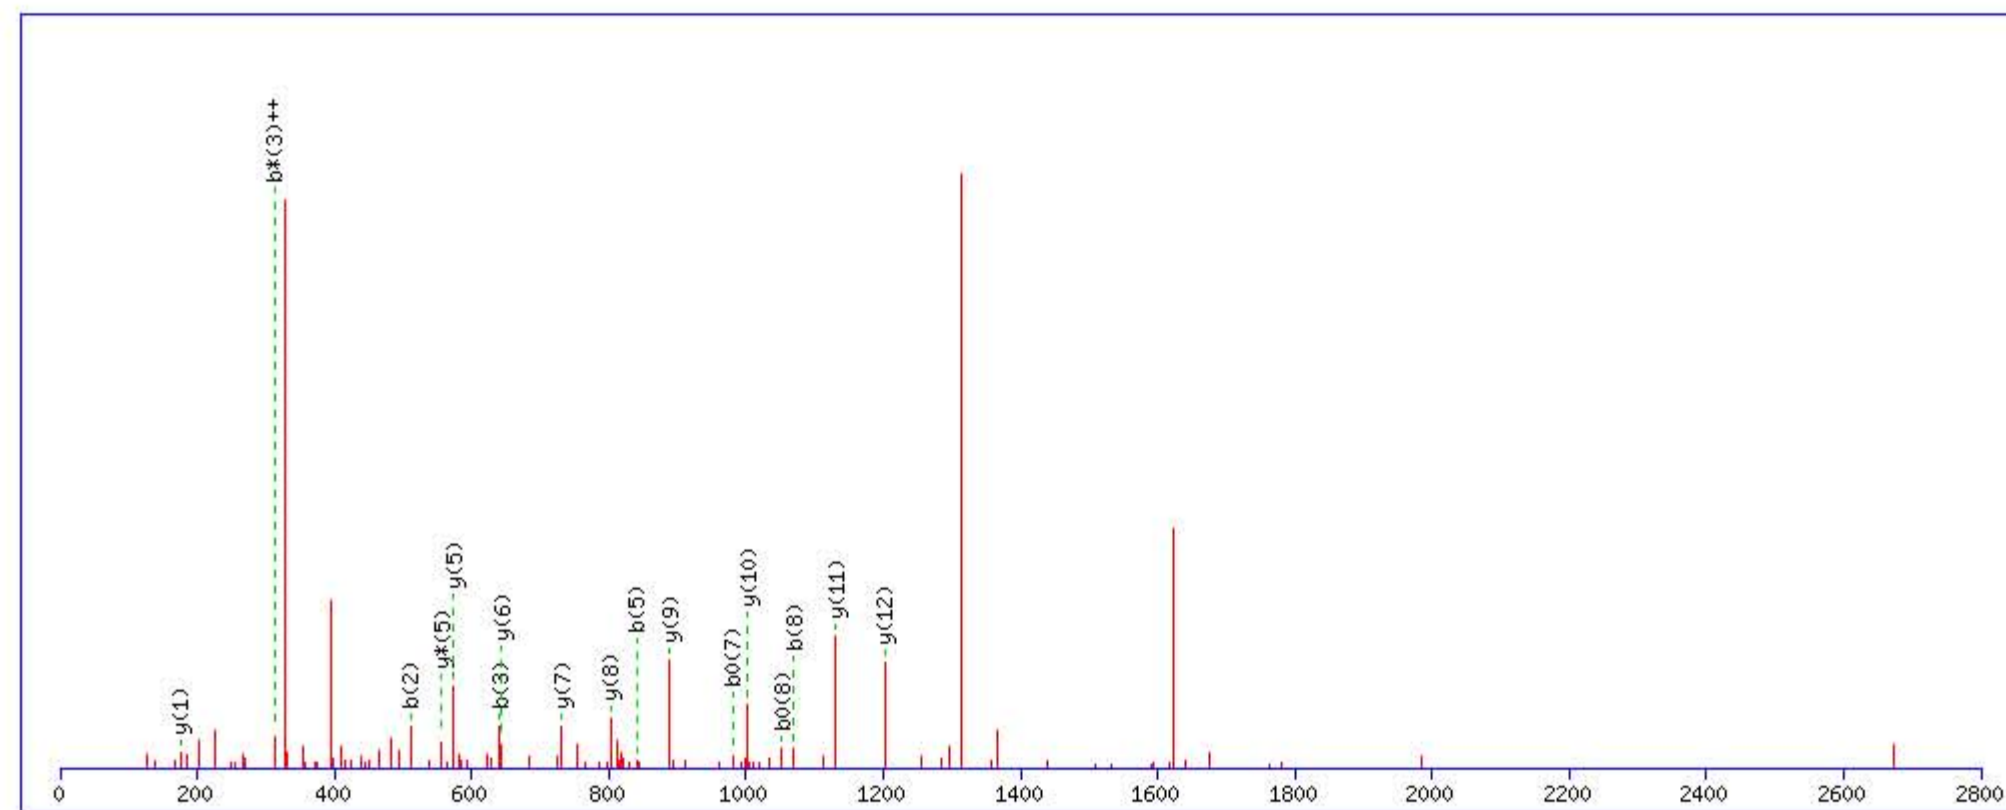

Monoisotopic mass of neutral peptide Mr(calc): 1640.855560

Fixed modifications: Carbamidomethyl (C) (apply to specified residues or termini only)

Variable modifications:

Q1 : Biotin:Thermo-21345 (Q)

Ions Score: 57 Expect: 5.9e-006

Matches : 17/136 fragment ions using 31 most intense peaks [\(help\)](#)

| #  | b                  | b <sup>++</sup> | b <sup>*</sup> | b <sup>+++</sup>  | b <sup>0</sup>     | b <sup>0++</sup> | Seq. | y                  | y <sup>++</sup> | y <sup>*</sup>    | y <sup>+++</sup> | y <sup>0</sup> | y <sup>0++</sup> | #  |
|----|--------------------|-----------------|----------------|-------------------|--------------------|------------------|------|--------------------|-----------------|-------------------|------------------|----------------|------------------|----|
| 1  | 440.232602         | 220.619939      | 423.206053     | 212.106664        |                    |                  | Q    |                    |                 |                   |                  |                |                  | 13 |
| 2  | <b>511.269716</b>  | 256.138496      | 494.243167     | 247.625221        |                    |                  | A    | <b>1202.637542</b> | 601.822409      | 1185.610993       | 593.309135       | 1184.626977    | 592.817126       | 12 |
| 3  | <b>640.312309</b>  | 320.659793      | 623.285760     | <b>312.146518</b> | 622.301744         | 311.654510       | E    | <b>1131.600428</b> | 566.303852      | 1114.573879       | 557.790578       | 1113.589863    | 557.298569       | 11 |
| 4  | 753.396373         | 377.201825      | 736.369824     | 368.688550        | 735.385808         | 368.196542       | I    | <b>1002.557835</b> | 501.782556      | 985.531286        | 493.269281       | 984.547270     | 492.777273       | 10 |
| 5  | <b>840.428401</b>  | 420.717839      | 823.401852     | 412.204564        | 822.417836         | 411.712556       | S    | <b>889.473771</b>  | 445.240523      | 872.447222        | 436.727249       | 871.463206     | 436.235241       | 9  |
| 6  | 911.465515         | 456.236396      | 894.438966     | 447.723121        | 893.454950         | 447.231113       | A    | <b>802.441743</b>  | 401.724510      | 785.415194        | 393.211235       | 784.431178     | 392.719227       | 8  |
| 7  | 998.497543         | 499.752410      | 981.470994     | 491.239135        | <b>980.486978</b>  | 490.747127       | S    | <b>731.404629</b>  | 366.205953      | 714.378080        | 357.692678       | 713.394064     | 357.200670       | 7  |
| 8  | <b>1069.534657</b> | 535.270966      | 1052.508108    | 526.757692        | <b>1051.524092</b> | 526.265684       | A    | <b>644.372601</b>  | 322.689939      | 627.346052        | 314.176664       | 626.362036     | 313.684656       | 6  |
| 9  | 1166.587421        | 583.797349      | 1149.560872    | 575.284074        | 1148.576856        | 574.792066       | P    | <b>573.335487</b>  | 287.171382      | <b>556.308938</b> | 278.658107       | 555.324922     | 278.166099       | 5  |
| 10 | 1267.635100        | 634.321188      | 1250.608551    | 625.807914        | 1249.624535        | 625.315905       | T    | 476.282723         | 238.644999      | 459.256174        | 230.131725       | 458.272158     | 229.639717       | 4  |
| 11 | 1354.667128        | 677.837202      | 1337.640579    | 669.323928        | 1336.656563        | 668.831920       | S    | 375.235044         | 188.121160      | 358.208495        | 179.607885       | 357.224479     | 179.115877       | 3  |
| 12 | 1467.751192        | 734.379234      | 1450.724643    | 725.865960        | 1449.740627        | 725.373951       | L    | 288.203016         | 144.605146      | 271.176467        | 136.091871       |                |                  | 2  |
| 13 |                    |                 |                |                   |                    |                  | R    | <b>175.118952</b>  | 88.063114       | 158.092403        | 79.549839        |                |                  | 1  |

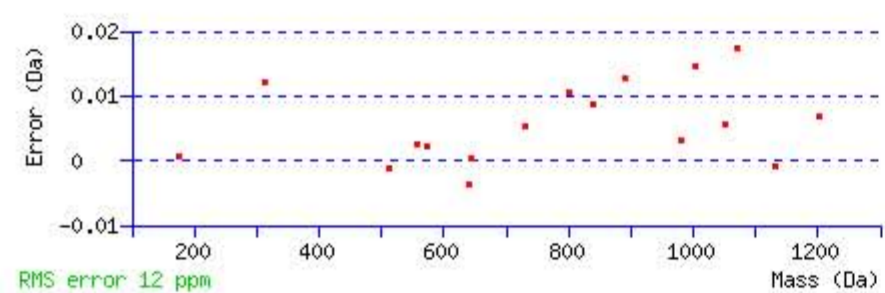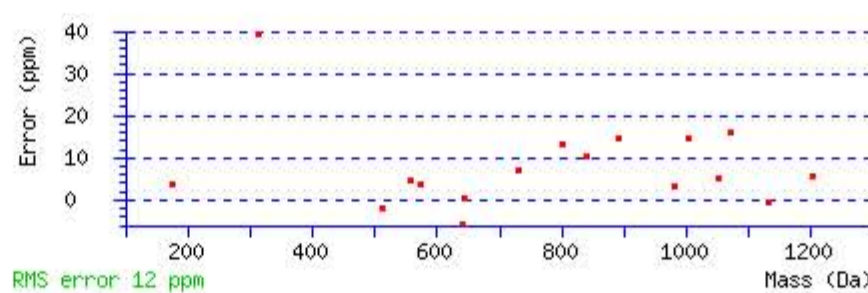

NCBI BLAST search of **QAEISASAPTSLR**

(Parameters: blastp, nr protein database, expect=20000, no filter, PAM30)

Other BLAST [web gateways](#)

## All matches to this query

| Score | Mr(calc):   | Delta     | Sequence                        |
|-------|-------------|-----------|---------------------------------|
| 57.1  | 1640.855560 | 0.008828  | <a href="#">QAEISASAPTSLR</a>   |
| 1.3   | 1640.884521 | -0.020133 | <a href="#">EAQKKPAESQKIER</a>  |
| 1.2   | 1640.848160 | 0.016228  | <a href="#">LQRILEGEGNQEAGK</a> |
| 0.8   | 1640.880707 | -0.016319 | <a href="#">KLSPELMNQLVPEK</a>  |

Mascot: <http://www.matrixscience.com/>



# MASCOT SEARCH RESULTS

## Peptide View

MS/MS Fragmentation of **GHQLQLDYFGACK**

Found in **SPRL1\_HUMAN**, SPARC-like protein 1 OS=Homo sapiens GN=SPARCL1 PE=1 SV=2

Match to Query 36560: 1846.887072 from(616.636300,3+) rtinseconds(2147) index(46895)

Title: Locus:1.1.1.3460.5 File:"2013-07-02 CLN FXIII 180 min 3rd F 4.wiff"

Data file C:\Program Files (x86)\Matrix Science\Mascot Daemon\mgf\9 FXIII 180 min 3rd\mascot\_daemon\_merge.mgf

Click mouse within plot area to zoom in by factor of two about that point

Or, Plot from  to  Da

Label all possible matches  Label matches used for scoring

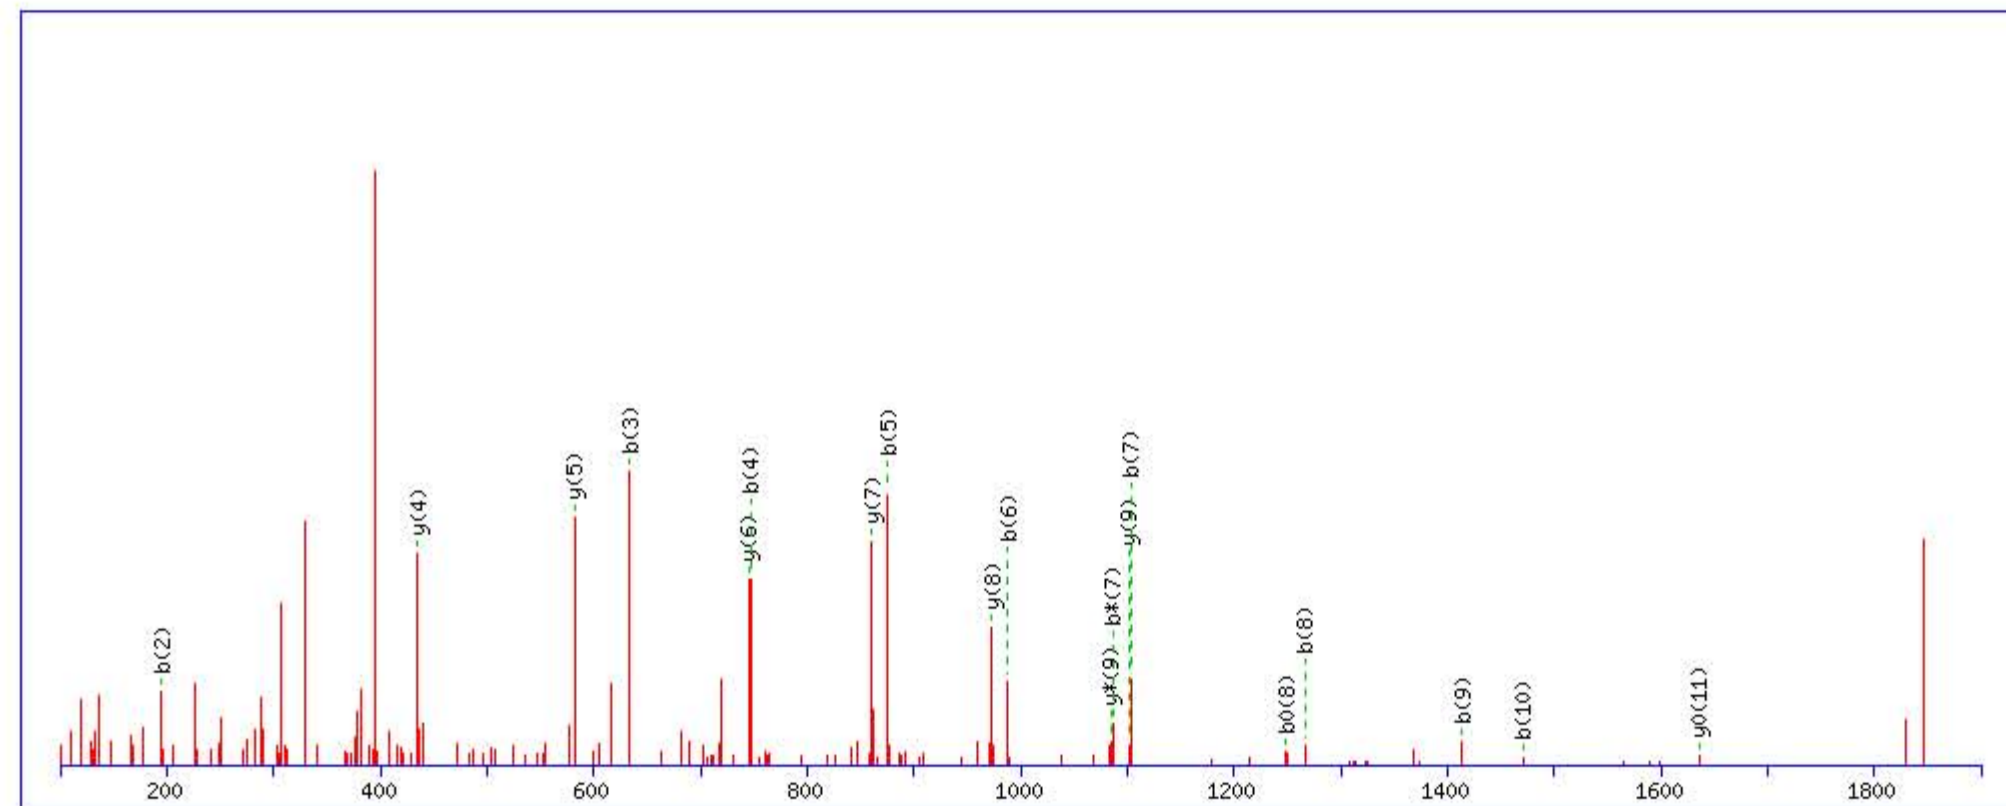

Monoisotopic mass of neutral peptide Mr(calc): 1846.885849

Fixed modifications: Carbamidomethyl (C) (apply to specified residues or termini only)

Variable modifications:

Q3 : Biotin:Thermo-21345 (Q)

Ions Score: 56 Expect: 1.2e-005

Matches : 19/116 fragment ions using 33 most intense peaks [\(help\)](#)

| #  | b                  | b <sup>++</sup> | b <sup>+</sup>     | b <sup>+++</sup> | b <sup>0</sup>     | b <sup>0++</sup> | Seq. | y                  | y <sup>++</sup> | y <sup>+</sup>     | y <sup>+++</sup> | y <sup>0</sup>     | y <sup>0++</sup> | #  |
|----|--------------------|-----------------|--------------------|------------------|--------------------|------------------|------|--------------------|-----------------|--------------------|------------------|--------------------|------------------|----|
| 1  | 58.028740          | 29.518008       |                    |                  |                    |                  | G    |                    |                 |                    |                  |                    |                  | 13 |
| 2  | <b>195.087652</b>  | 98.047464       |                    |                  |                    |                  | H    | 1790.871661        | 895.939469      | 1773.845112        | 887.426194       | 1772.861096        | 886.934186       | 12 |
| 3  | <b>634.312978</b>  | 317.660127      | 617.286429         | 309.146853       |                    |                  | Q    | 1653.812749        | 827.410013      | 1636.786200        | 818.896738       | <b>1635.802184</b> | 818.404730       | 11 |
| 4  | <b>747.397042</b>  | 374.202159      | 730.370493         | 365.688885       |                    |                  | L    | 1214.587423        | 607.797350      | 1197.560874        | 599.284075       | 1196.576858        | 598.792067       | 10 |
| 5  | <b>875.455620</b>  | 438.231448      | 858.429071         | 429.718174       |                    |                  | Q    | <b>1101.503359</b> | 551.255318      | <b>1084.476810</b> | 542.742043       | 1083.492794        | 542.250035       | 9  |
| 6  | <b>988.539684</b>  | 494.773480      | 971.513135         | 486.260206       |                    |                  | L    | <b>973.444781</b>  | 487.226029      | 956.418232         | 478.712754       | 955.434216         | 478.220746       | 8  |
| 7  | <b>1103.566627</b> | 552.286952      | <b>1086.540078</b> | 543.773677       | 1085.556062        | 543.281669       | D    | <b>860.360717</b>  | 430.683997      | 843.334168         | 422.170722       | 842.350152         | 421.678714       | 7  |
| 8  | <b>1266.629956</b> | 633.818616      | 1249.603407        | 625.305342       | <b>1248.619391</b> | 624.813334       | Y    | <b>745.333774</b>  | 373.170525      | 728.307225         | 364.657251       |                    |                  | 6  |
| 9  | <b>1413.698370</b> | 707.352823      | 1396.671821        | 698.839549       | 1395.687805        | 698.347541       | F    | <b>582.270445</b>  | 291.638861      | 565.243896         | 283.125586       |                    |                  | 5  |
| 10 | <b>1470.719834</b> | 735.863555      | 1453.693285        | 727.350281       | 1452.709269        | 726.858273       | G    | <b>435.202031</b>  | 218.104653      | 418.175482         | 209.591379       |                    |                  | 4  |
| 11 | 1541.756948        | 771.382112      | 1524.730399        | 762.868838       | 1523.746383        | 762.376830       | A    | 378.180567         | 189.593921      | 361.154018         | 181.080647       |                    |                  | 3  |
| 12 | 1701.787597        | 851.397437      | 1684.761048        | 842.884162       | 1683.777032        | 842.392154       | C    | 307.143453         | 154.075365      | 290.116904         | 145.562090       |                    |                  | 2  |
| 13 |                    |                 |                    |                  |                    |                  | K    | 147.112804         | 74.060040       | 130.086255         | 65.546765        |                    |                  | 1  |

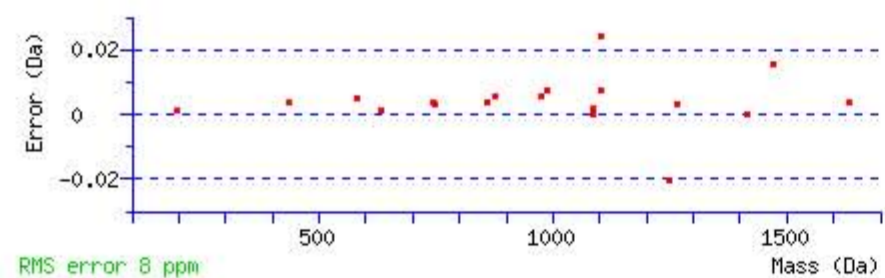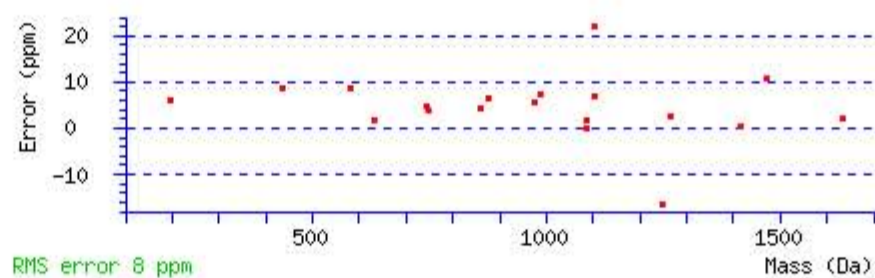

NCBI BLAST search of **GHQLQLDYFGACK**

(Parameters: blastp, nr protein database, expect=20000, no filter, PAM30)

Other BLAST [web gateways](#)

All matches to this query

| Score | Mr(calc):   | Delta     | Sequence                        |
|-------|-------------|-----------|---------------------------------|
| 55.8  | 1846.885849 | 0.001223  | <a href="#">GHQLQLDYFGACK</a>   |
| 30.0  | 1846.885849 | 0.001223  | <a href="#">GHQLQLDYFGACK</a>   |
| 3.5   | 1846.906082 | -0.019010 | <a href="#">DLNTGVFNNQENELK</a> |

Mascot: <http://www.matrixscience.com/>

# MASCOT Search Results

## Peptide View

MS/MS Fragmentation of **SIPTCTDFEVIQFPLR**

Found in **SPRL1\_HUMAN**, SPARC-like protein 1 OS=Homo sapiens GN=SPARCL1 PE=1 SV=2

Match to Query 43856: 2233.134462 from(745.385430,3+) rtinseconds(2822) index(50941)

Title: Locus:1.1.1.3693.11 File:"2013-07-02 CLN FXIII 180 min 3rd F 4.wiff"

Data file C:\Program Files (x86)\Matrix Science\Mascot Daemon\mgf9 FXIII 180 min 3rd\mascot\_daemon\_merge.mgf

Click mouse within plot area to zoom in by factor of two about that point

Or, Plot from  to  Da

Label all possible matches  Label matches used for scoring

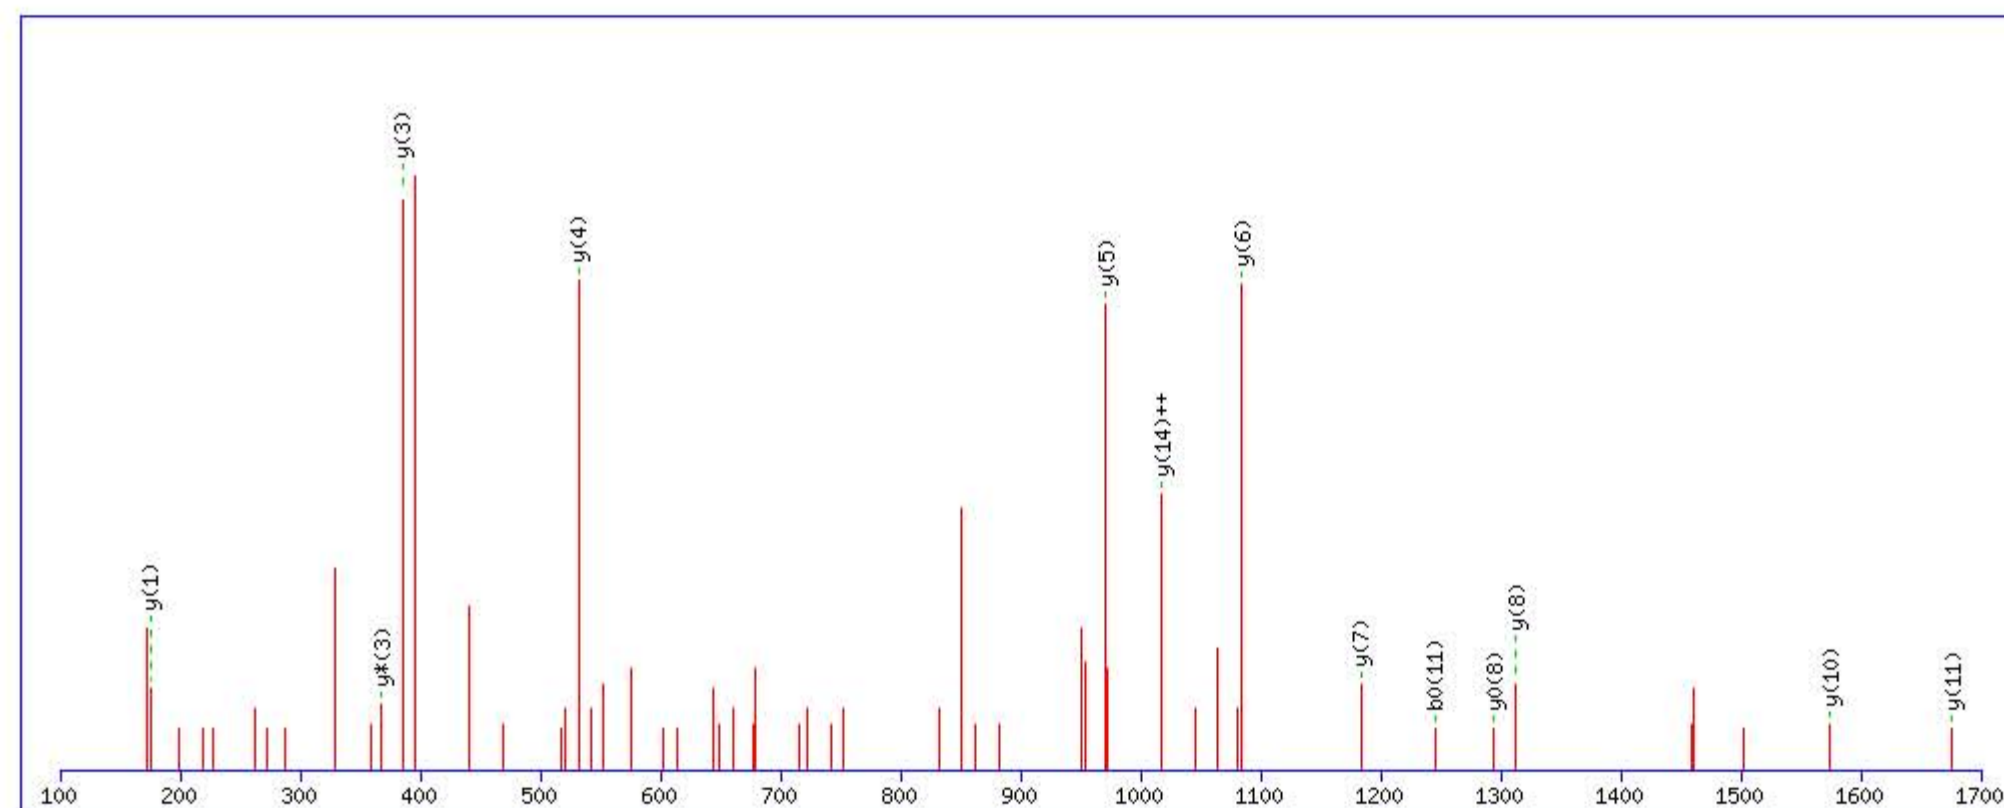

Monoisotopic mass of neutral peptide Mr(calc): 2233.127548

Fixed modifications: Carbamidomethyl (C) (apply to specified residues or termini only)

Variable modifications:

Q12 : Biotin:Thermo-21345 (Q)

Ions Score: 39 Expect: 0.00052

Matches : 13/144 fragment ions using 29 most intense peaks [\(help\)](#)

| #  | b           | b <sup>++</sup> | b <sup>*</sup> | b <sup>*++</sup> | b <sup>0</sup> | b <sup>0++</sup> | Seq. | y           | y <sup>++</sup> | y <sup>*</sup> | y <sup>*++</sup> | y <sup>0</sup> | y <sup>0++</sup> | #  |
|----|-------------|-----------------|----------------|------------------|----------------|------------------|------|-------------|-----------------|----------------|------------------|----------------|------------------|----|
| 1  | 88.039304   | 44.523290       |                |                  | 70.028739      | 35.518008        | S    |             |                 |                |                  |                |                  | 16 |
| 2  | 201.123368  | 101.065322      |                |                  | 183.112803     | 92.060039        | I    | 2147.102783 | 1074.055029     | 2130.076234    | 1065.541755      | 2129.092218    | 1065.049747      | 15 |
| 3  | 298.176132  | 149.591704      |                |                  | 280.165567     | 140.586422       | P    | 2034.018719 | 1017.512998     | 2016.992170    | 1008.999723      | 2016.008154    | 1008.507715      | 14 |
| 4  | 399.223811  | 200.115544      |                |                  | 381.213246     | 191.110261       | T    | 1936.965955 | 968.986616      | 1919.939406    | 960.473341       | 1918.955390    | 959.981333       | 13 |
| 5  | 559.254460  | 280.130868      |                |                  | 541.243895     | 271.125586       | C    | 1835.918276 | 918.462776      | 1818.891727    | 909.949502       | 1817.907711    | 909.457494       | 12 |
| 6  | 660.302139  | 330.654708      |                |                  | 642.291574     | 321.649425       | T    | 1675.887627 | 838.447452      | 1658.861078    | 829.934177       | 1657.877062    | 829.442169       | 11 |
| 7  | 775.329082  | 388.168179      |                |                  | 757.318517     | 379.162897       | D    | 1574.839948 | 787.923612      | 1557.813399    | 779.410338       | 1556.829383    | 778.918330       | 10 |
| 8  | 922.397496  | 461.702386      |                |                  | 904.386931     | 452.697104       | F    | 1459.813005 | 730.410141      | 1442.786456    | 721.896866       | 1441.802440    | 721.404858       | 9  |
| 9  | 1051.440089 | 526.223683      |                |                  | 1033.429524    | 517.218400       | E    | 1312.744591 | 656.875934      | 1295.718042    | 648.362659       | 1294.734026    | 647.870651       | 8  |
| 10 | 1150.508503 | 575.757890      |                |                  | 1132.497938    | 566.752607       | V    | 1183.701998 | 592.354637      | 1166.675449    | 583.841363       |                |                  | 7  |
| 11 | 1263.592567 | 632.299921      |                |                  | 1245.582002    | 623.294639       | I    | 1084.633584 | 542.820430      | 1067.607035    | 534.307156       |                |                  | 6  |
| 12 | 1702.817893 | 851.912585      | 1685.791344    | 843.399310       | 1684.807328    | 842.907302       | Q    | 971.549520  | 486.278398      | 954.522971     | 477.765124       |                |                  | 5  |
| 13 | 1849.886307 | 925.446792      | 1832.859758    | 916.933517       | 1831.875742    | 916.441509       | F    | 532.324194  | 266.665735      | 515.297645     | 258.152461       |                |                  | 4  |
| 14 | 1946.939071 | 973.973174      | 1929.912522    | 965.459899       | 1928.928506    | 964.967891       | P    | 385.255780  | 193.131528      | 368.229231     | 184.618253       |                |                  | 3  |
| 15 | 2060.023135 | 1030.515205     | 2042.996586    | 1022.001931      | 2042.012570    | 1021.509923      | L    | 288.203016  | 144.605146      | 271.176467     | 136.091871       |                |                  | 2  |
| 16 |             |                 |                |                  |                |                  | R    | 175.118952  | 88.063114       | 158.092403     | 79.549839        |                |                  | 1  |

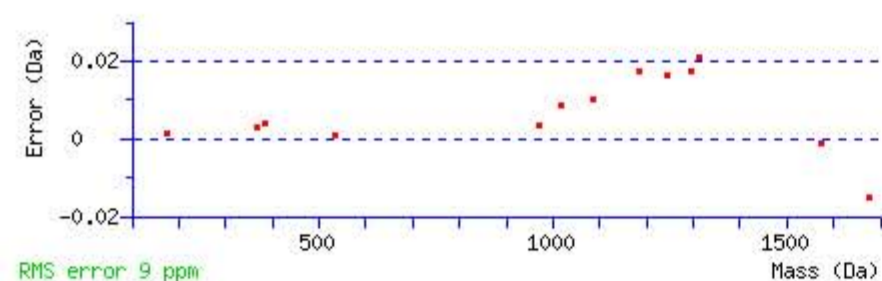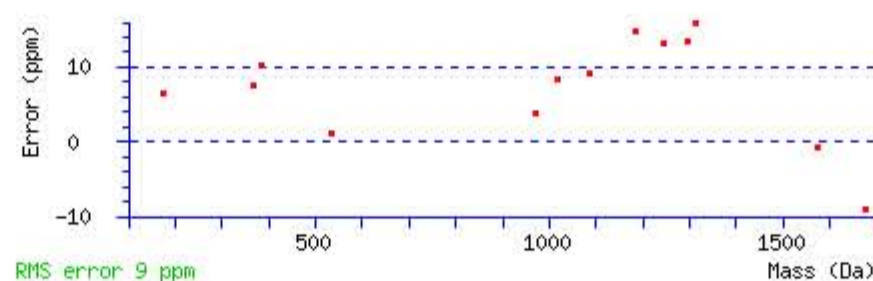

NCBI BLAST search of [SIPTCTDFEVIQFPLR](#)

(Parameters: blastp, nr protein database, expect=20000, no filter, PAM30)

Other BLAST [web gateways](#)

### All matches to this query

| Score | Mr(calc):   | Delta     | Sequence                                 |
|-------|-------------|-----------|------------------------------------------|
| 39.1  | 2233.127548 | 0.006914  | <a href="#">SIPTCTDFEVIQFPLR</a>         |
| 3.9   | 2233.141861 | -0.007399 | <a href="#">FELPLDIPEEEARYWAKK</a>       |
| 0.4   | 2233.108704 | 0.025758  | <a href="#">AQLGSWGKGGSSGGAKASETDALR</a> |

# MASCOT SEARCH RESULTS

## Peptide View

MS/MS Fragmentation of **QELAVFCSPEPPAK**

Found in **TLN1\_HUMAN**, Talin-1 OS=Homo sapiens GN=TLN1 PE=1 SV=3

Match to Query 37214: 1882.938882 from(628.653570,3+) rtinseconds(2259) index(47613)

Title: Locus:1.1.1.3499.9 File:"2013-07-02 CLN FXIII 180 min 3rd F 4.wiff"

Data file C:\Program Files (x86)\Matrix Science\Mascot Daemon\mgf9 FXIII 180 min 3rd\mascot\_daemon\_merge.mgf

Click mouse within plot area to zoom in by factor of two about that point

Or, Plot from 0 to 2600 Da Full range

Label all possible matches  Label matches used for scoring

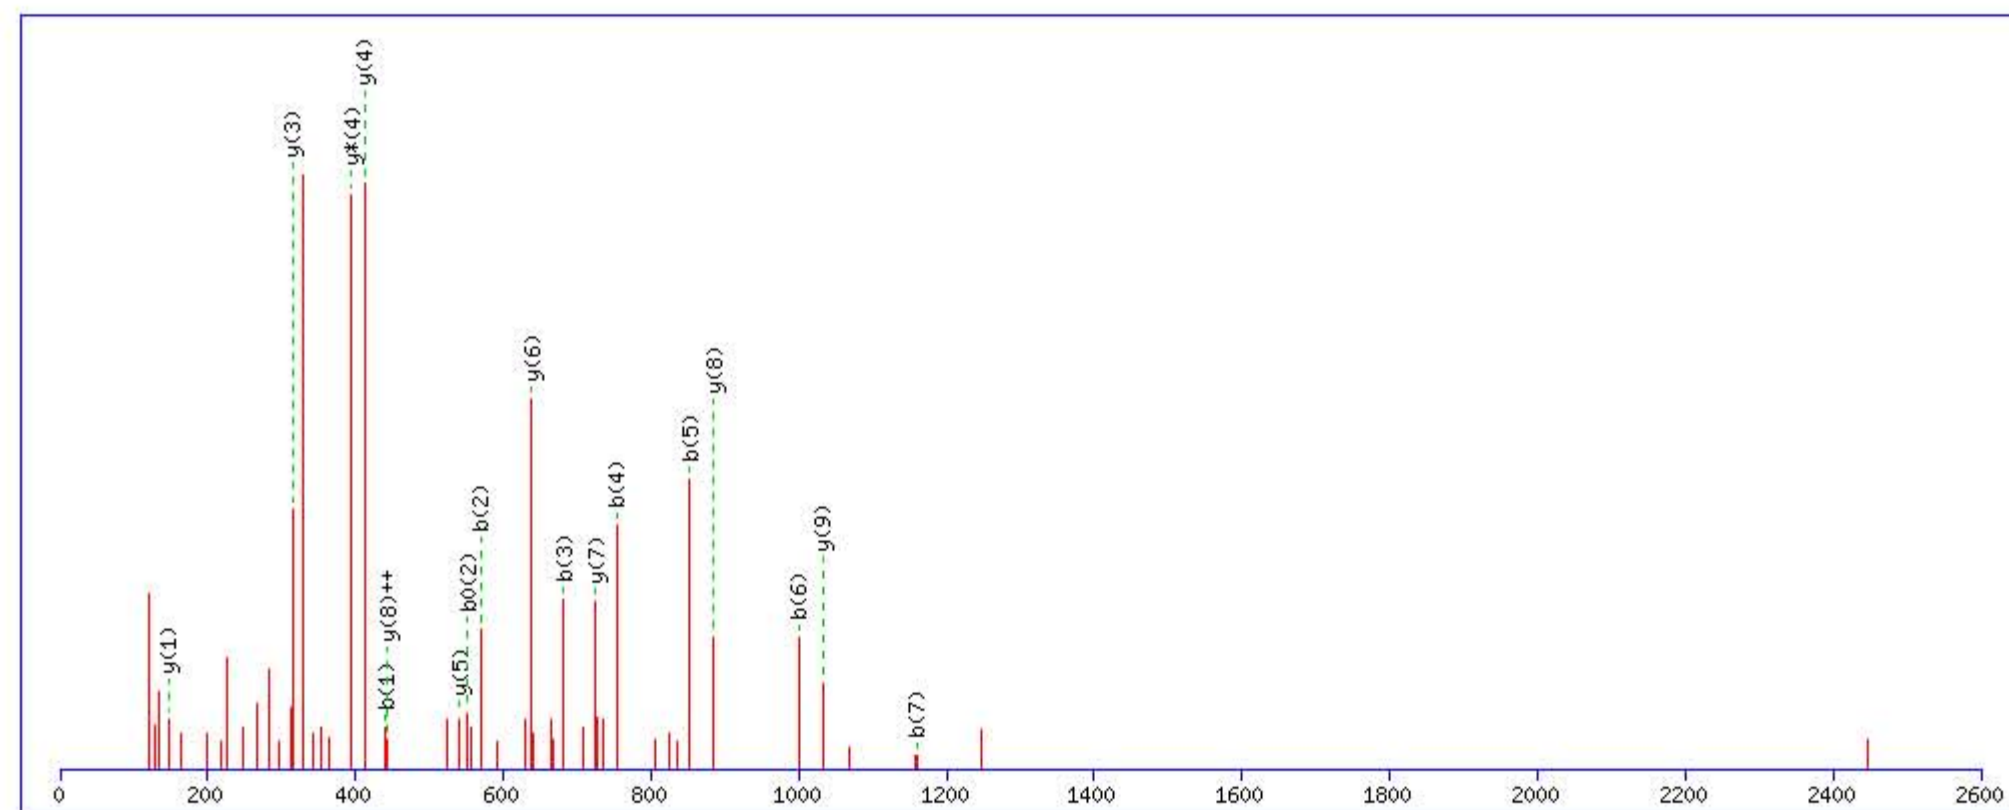

Monoisotopic mass of neutral peptide Mr(calc): 1882.932114

Fixed modifications: Carbamidomethyl (C) (apply to specified residues or termini only)

Variable modifications:

Q1 : Biotin:Thermo-21345 (Q)

Ions Score: 63 Expect: 1.7e-006

Matches : 18/146 fragment ions using 29 most intense peaks [\(help\)](#)

| #  | b           | b <sup>++</sup> | b <sup>+</sup> | b <sup>+++</sup> | b <sup>0</sup> | b <sup>0++</sup> | Seq. | y           | y <sup>++</sup> | y <sup>+</sup> | y <sup>+++</sup> | y <sup>0</sup> | y <sup>0++</sup> | #  |
|----|-------------|-----------------|----------------|------------------|----------------|------------------|------|-------------|-----------------|----------------|------------------|----------------|------------------|----|
| 1  | 440.232602  | 220.619939      | 423.206053     | 212.106664       |                |                  | Q    |             |                 |                |                  |                |                  | 14 |
| 2  | 569.275195  | 285.141236      | 552.248646     | 276.627961       | 551.264630     | 276.135953       | E    | 1444.714079 | 722.860678      | 1427.687530    | 714.347403       | 1426.703514    | 713.855395       | 13 |
| 3  | 682.359259  | 341.683268      | 665.332710     | 333.169993       | 664.348694     | 332.677985       | L    | 1315.671486 | 658.339381      | 1298.644937    | 649.826107       | 1297.660921    | 649.334098       | 12 |
| 4  | 753.396373  | 377.201825      | 736.369824     | 368.688550       | 735.385808     | 368.196542       | A    | 1202.587422 | 601.797349      | 1185.560873    | 593.284075       | 1184.576857    | 592.792067       | 11 |
| 5  | 852.464787  | 426.736032      | 835.438238     | 418.222757       | 834.454222     | 417.730749       | V    | 1131.550308 | 566.278792      | 1114.523759    | 557.765518       | 1113.539743    | 557.273510       | 10 |
| 6  | 999.533201  | 500.270239      | 982.506652     | 491.756964       | 981.522636     | 491.264956       | F    | 1032.481894 | 516.744585      | 1015.455345    | 508.231311       | 1014.471329    | 507.739303       | 9  |
| 7  | 1159.563850 | 580.285563      | 1142.537301    | 571.772289       | 1141.553285    | 571.280281       | C    | 885.413480  | 443.210378      | 868.386931     | 434.697104       | 867.402915     | 434.205096       | 8  |
| 8  | 1246.595878 | 623.801577      | 1229.569329    | 615.288303       | 1228.585313    | 614.796295       | S    | 725.382831  | 363.195054      | 708.356282     | 354.681779       | 707.372266     | 354.189771       | 7  |
| 9  | 1343.648642 | 672.327959      | 1326.622093    | 663.814685       | 1325.638077    | 663.322677       | P    | 638.350803  | 319.679040      | 621.324254     | 311.165765       | 620.340238     | 310.673757       | 6  |
| 10 | 1472.691235 | 736.849256      | 1455.664686    | 728.335981       | 1454.680670    | 727.843973       | E    | 541.298039  | 271.152658      | 524.271490     | 262.639383       | 523.287474     | 262.147375       | 5  |
| 11 | 1569.743999 | 785.375638      | 1552.717450    | 776.862363       | 1551.733434    | 776.370355       | P    | 412.255446  | 206.631361      | 395.228897     | 198.118087       |                |                  | 4  |
| 12 | 1666.796763 | 833.902020      | 1649.770214    | 825.388745       | 1648.786198    | 824.896737       | P    | 315.202682  | 158.104979      | 298.176133     | 149.591704       |                |                  | 3  |
| 13 | 1737.833877 | 869.420577      | 1720.807328    | 860.907302       | 1719.823312    | 860.415294       | A    | 218.149918  | 109.578597      | 201.123369     | 101.065322       |                |                  | 2  |
| 14 |             |                 |                |                  |                |                  | K    | 147.112804  | 74.060040       | 130.086255     | 65.546765        |                |                  | 1  |

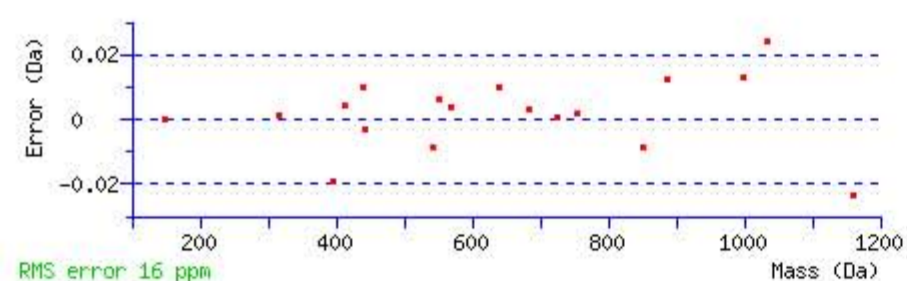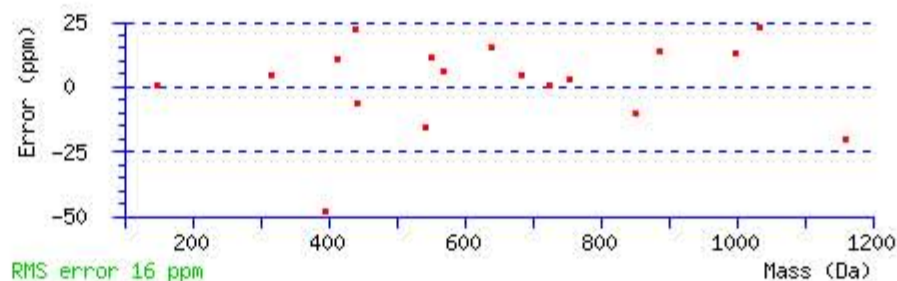

NCBI BLAST search of **QELAVFCSPEPPAK**

(Parameters: blastp, nr protein database, expect=20000, no filter, PAM30)

Other BLAST [web gateways](#)

All matches to this query

| Score | Mr(calc):   | Delta     | Sequence                          |
|-------|-------------|-----------|-----------------------------------|
| 62.6  | 1882.932114 | 0.006768  | <a href="#">QELAVFCSPEPPAK</a>    |
| 1.1   | 1882.949875 | -0.010993 | <a href="#">ISGHVGIIFSMSYLESK</a> |

Mascot: <http://www.matrixscience.com/>

# MASCOT Search Results

## Peptide View

MS/MS Fragmentation of **LDTLAQEVALLK**

Found in **TETN\_HUMAN**, Tetraectin OS=Homo sapiens GN=CLEC3B PE=1 SV=3

Match to Query 31588: 1623.942548 from(812.978550,2+) rtinseconds(2629) index(8320)

Title: Locus:1.1.1.3435.19 File:"2013-07-02 CLN FXIII 180 min 3rd F 1.wiff"

Data file C:\Program Files (x86)\Matrix Science\Mascot Daemon\mgf\9 FXIII 180 min 3rd\mascot\_daemon\_merge.mgf

Click mouse within plot area to zoom in by factor of two about that point

Or, Plot from  to  Da

Label all possible matches  Label matches used for scoring

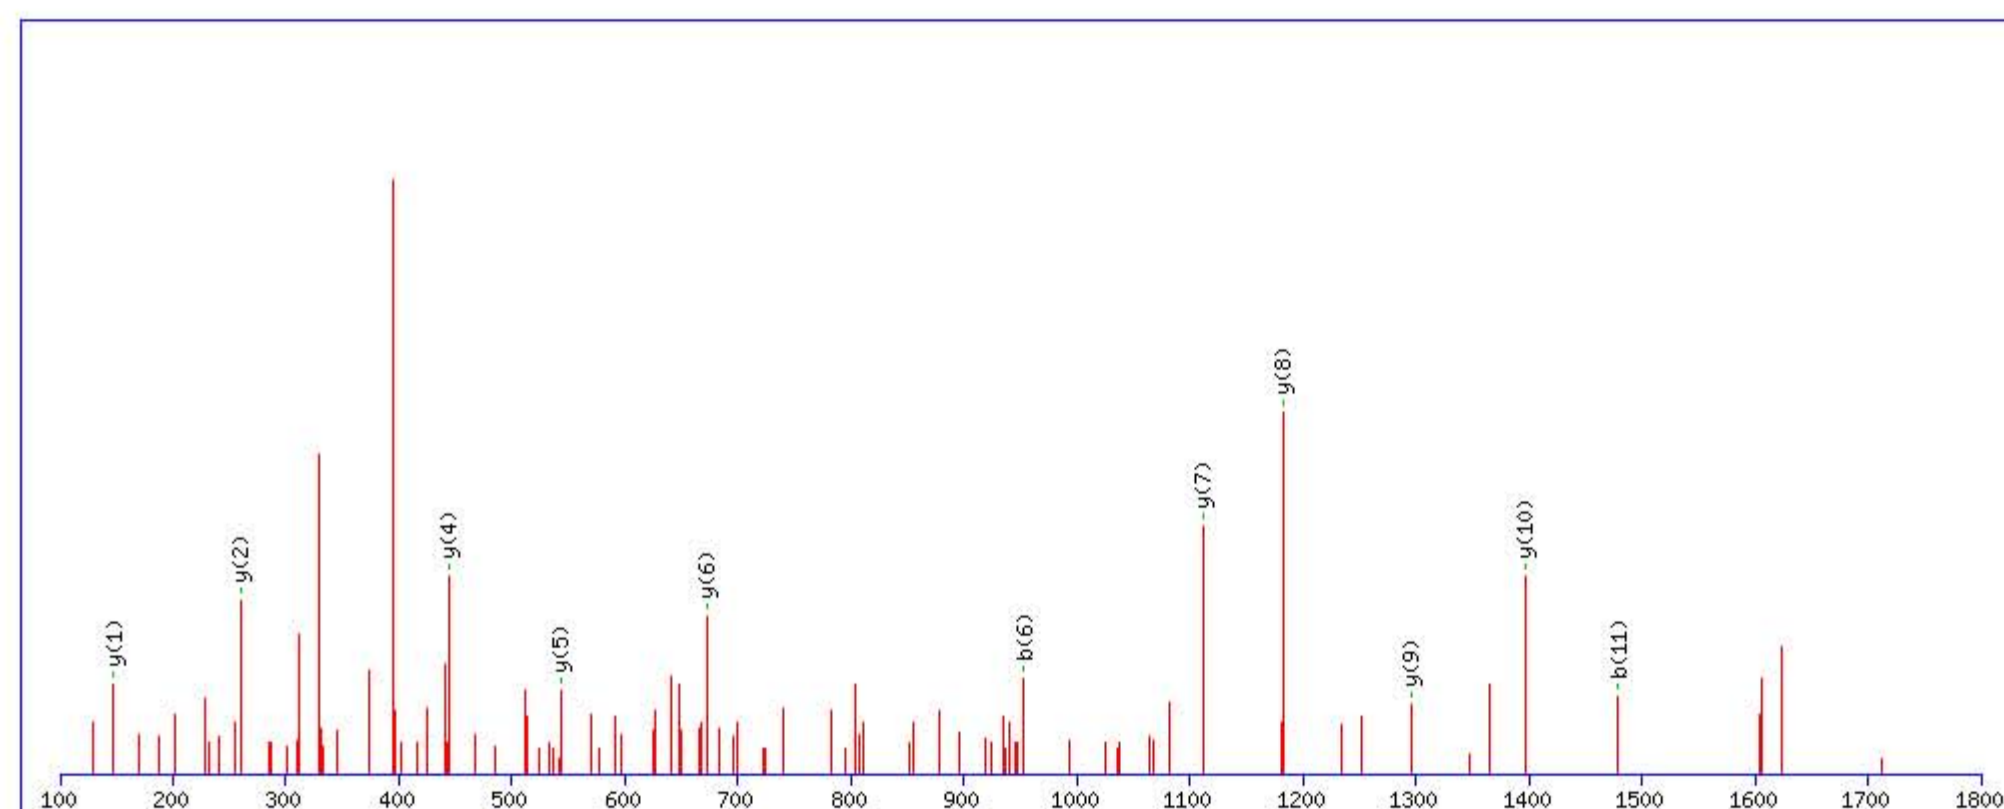

Monoisotopic mass of neutral peptide Mr(calc): 1623.926941

Fixed modifications: Carbamidomethyl (C) (apply to specified residues or termini only)

Variable modifications:

Q6 : Biotin:Thermo-21345 (Q)

Ions Score: 83 Expect: 3.9e-008

Matches : 11/110 fragment ions using 15 most intense peaks [\(help\)](#)

| #  | b                  | b <sup>++</sup> | b <sup>*</sup> | b <sup>+++</sup> | b <sup>0</sup> | b <sup>0++</sup> | Seq. | y                  | y <sup>++</sup> | y <sup>*</sup> | y <sup>+++</sup> | y <sup>0</sup> | y <sup>0++</sup> | #  |
|----|--------------------|-----------------|----------------|------------------|----------------|------------------|------|--------------------|-----------------|----------------|------------------|----------------|------------------|----|
| 1  | 114.091340         | 57.549308       |                |                  |                |                  | L    |                    |                 |                |                  |                |                  | 12 |
| 2  | 229.118283         | 115.062779      |                |                  | 211.107718     | 106.057497       | D    | 1511.850179        | 756.428728      | 1494.823630    | 747.915453       | 1493.839614    | 747.423445       | 11 |
| 3  | 330.165962         | 165.586619      |                |                  | 312.155397     | 156.581336       | T    | <b>1396.823236</b> | 698.915256      | 1379.796687    | 690.401982       | 1378.812671    | 689.909973       | 10 |
| 4  | 443.250026         | 222.128651      |                |                  | 425.239461     | 213.123369       | L    | <b>1295.775557</b> | 648.391416      | 1278.749008    | 639.878142       | 1277.764992    | 639.386134       | 9  |
| 5  | 514.287140         | 257.647208      |                |                  | 496.276575     | 248.641926       | A    | <b>1182.691493</b> | 591.849385      | 1165.664944    | 583.336110       | 1164.680928    | 582.844102       | 8  |
| 6  | <b>953.512466</b>  | 477.259871      | 936.485917     | 468.746597       | 935.501901     | 468.254589       | Q    | <b>1111.654379</b> | 556.330827      | 1094.627830    | 547.817553       | 1093.643814    | 547.325545       | 7  |
| 7  | 1082.555059        | 541.781168      | 1065.528510    | 533.267893       | 1064.544494    | 532.775885       | E    | <b>672.429053</b>  | 336.718165      | 655.402504     | 328.204890       | 654.418488     | 327.712882       | 6  |
| 8  | 1181.623473        | 591.315375      | 1164.596924    | 582.802100       | 1163.612908    | 582.310092       | V    | <b>543.386460</b>  | 272.196868      | 526.359911     | 263.683593       |                |                  | 5  |
| 9  | 1252.660587        | 626.833932      | 1235.634038    | 618.320657       | 1234.650022    | 617.828649       | A    | <b>444.318046</b>  | 222.662661      | 427.291497     | 214.149386       |                |                  | 4  |
| 10 | 1365.744651        | 683.375964      | 1348.718102    | 674.862689       | 1347.734086    | 674.370681       | L    | 373.280932         | 187.144104      | 356.254383     | 178.630829       |                |                  | 3  |
| 11 | <b>1478.828715</b> | 739.917995      | 1461.802166    | 731.404721       | 1460.818150    | 730.912713       | L    | <b>260.196868</b>  | 130.602072      | 243.170319     | 122.088797       |                |                  | 2  |
| 12 |                    |                 |                |                  |                |                  | K    | <b>147.112804</b>  | 74.060040       | 130.086255     | 65.546765        |                |                  | 1  |

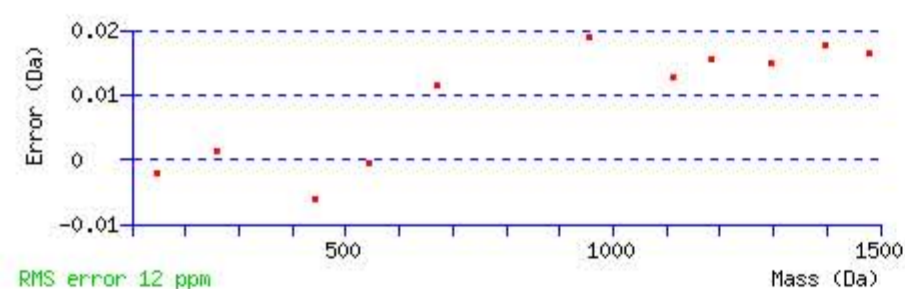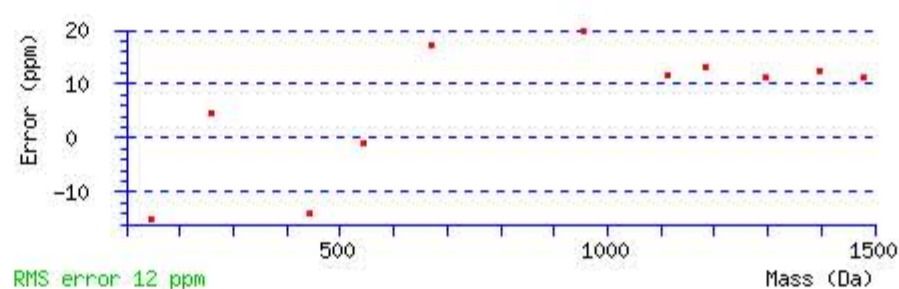

NCBI BLAST search of **LDTLAQEVALLK**

(Parameters: blastp, nr protein database, expect=20000, no filter, PAM30)

Other BLAST [web gateways](#)

All matches to this query

| Score | Mr(calc):   | Delta     | Sequence                         |
|-------|-------------|-----------|----------------------------------|
| 82.6  | 1623.926941 | 0.015607  | <a href="#">LDTLAQEVALLK</a>     |
| 5.5   | 1623.919556 | 0.022992  | <a href="#">EVSPEPIVSTVARLK</a>  |
| 5.3   | 1623.928268 | 0.014280  | <a href="#">EVQRLYHKLK</a>       |
| 2.8   | 1623.944702 | -0.002154 | <a href="#">EVELIQVTPKDIK</a>    |
| 1.9   | 1623.942001 | 0.000547  | <a href="#">ESKPGGLPRRSSIIK</a>  |
| 1.9   | 1623.919540 | 0.023008  | <a href="#">KLSLGTAEPQVKEPK</a>  |
| 1.5   | 1623.934799 | 0.007749  | <a href="#">FIQKFSQASSKILK</a>   |
| 1.3   | 1623.955933 | -0.013385 | <a href="#">GAAVNLTIVTPEKAIK</a> |
| 1.0   | 1623.957245 | -0.014697 | <a href="#">ERQLLWLELLRR</a>     |

# MASCOT Search Results

## Peptide View

MS/MS Fragmentation of **ETIEQEK**

Found in **TYB10\_HUMAN**, Thymosin beta-10 OS=Homo sapiens GN=TMSB10 PE=1 SV=2

Match to Query 17448: 1186.587848 from(594.301200,2+) rtinseconds(1459) index(57724)

Title: Locus:1.1.1.1419.14 File:"2013-07-02 CLN FXIII 180 min 3rd FT.wiff"

Data file C:\Program Files (x86)\Matrix Science\Mascot Daemon\mgf9 FXIII 180 min 3rd\mascot\_daemon\_merge.mgf

Click mouse within plot area to zoom in by factor of two about that point

Or, Plot from  to  Da

Label all possible matches  Label matches used for scoring

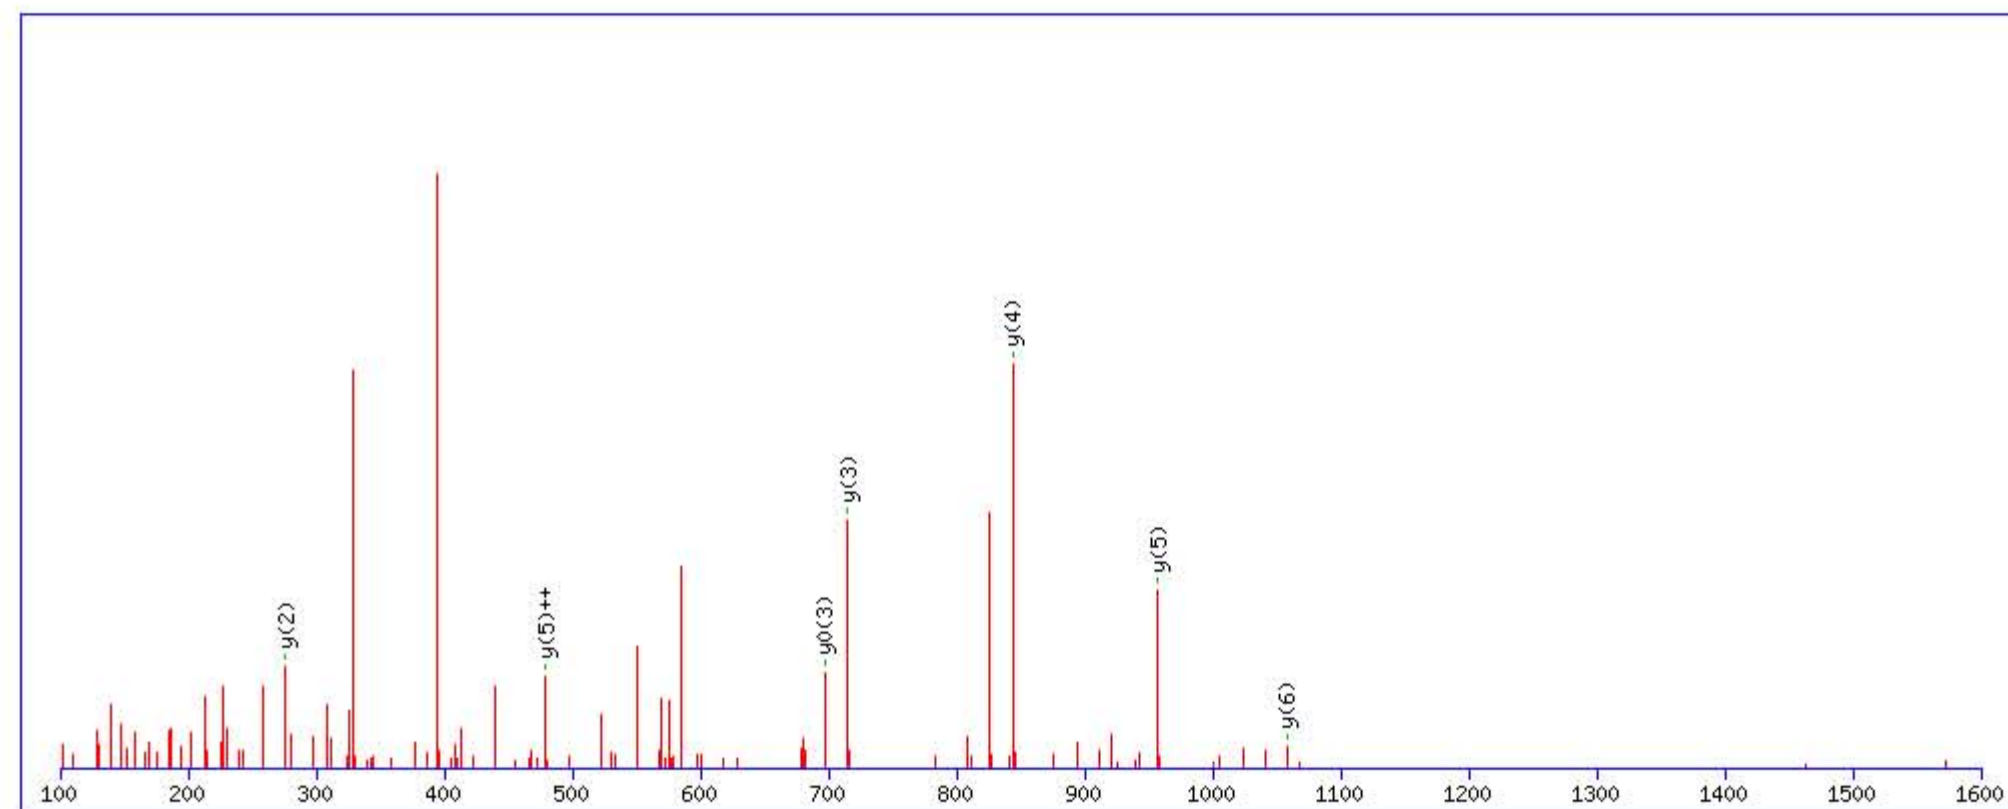

Monoisotopic mass of neutral peptide Mr(calc): 1186.590347

Fixed modifications: Carbamidomethyl (C) (apply to specified residues or termini only)

Variable modifications:

Q5 : Biotin:Thermo-21345 (Q)

Ions Score: 38 Expect: 0.0018

Matches : 7/62 fragment ions using 10 most intense peaks [\(help\)](#)

| # | b           | b <sup>++</sup> | b <sup>*</sup> | b <sup>+++</sup> | b <sup>0</sup> | b <sup>0++</sup> | Seq. | y                  | y <sup>++</sup>   | y <sup>*</sup> | y <sup>+++</sup> | y <sup>0</sup>    | y <sup>0++</sup> | # |
|---|-------------|-----------------|----------------|------------------|----------------|------------------|------|--------------------|-------------------|----------------|------------------|-------------------|------------------|---|
| 1 | 130.049869  | 65.528572       |                |                  | 112.039304     | 56.523290        | E    |                    |                   |                |                  |                   |                  | 7 |
| 2 | 231.097548  | 116.052412      |                |                  | 213.086983     | 107.047130       | T    | <b>1058.555059</b> | 529.781168        | 1041.528510    | 521.267893       | 1040.544494       | 520.775885       | 6 |
| 3 | 344.181612  | 172.594444      |                |                  | 326.171047     | 163.589162       | I    | <b>957.507380</b>  | <b>479.257328</b> | 940.480831     | 470.744054       | 939.496815        | 470.252046       | 5 |
| 4 | 473.224205  | 237.115741      |                |                  | 455.213640     | 228.110458       | E    | <b>844.423316</b>  | 422.715296        | 827.396767     | 414.202022       | 826.412751        | 413.710014       | 4 |
| 5 | 912.449531  | 456.728404      | 895.422982     | 448.215129       | 894.438966     | 447.723121       | Q    | <b>715.380723</b>  | 358.194000        | 698.354174     | 349.680725       | <b>697.370158</b> | 349.188717       | 3 |
| 6 | 1041.492124 | 521.249700      | 1024.465575    | 512.736426       | 1023.481559    | 512.244418       | E    | <b>276.155397</b>  | 138.581336        | 259.128848     | 130.068062       | 258.144832        | 129.576054       | 2 |
| 7 |             |                 |                |                  |                |                  | K    | 147.112804         | 74.060040         | 130.086255     | 65.546765        |                   |                  | 1 |

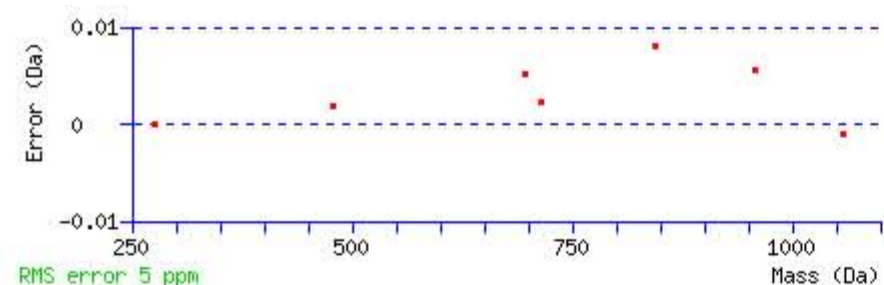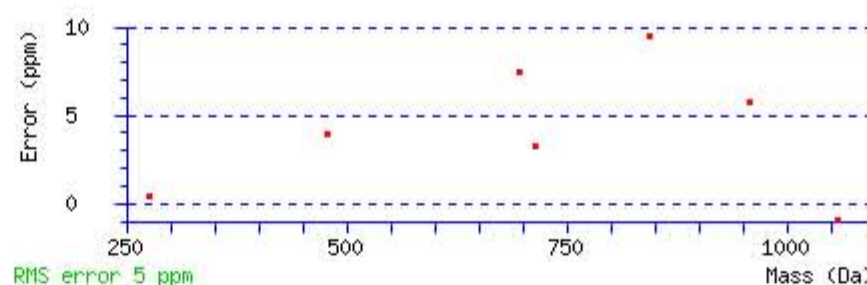

NCBI BLAST search of **ETIEQEK**

(Parameters: blastp, nr protein database, expect=20000, no filter, PAM30)

Other BLAST [web gateways](#)

All matches to this query

| Score | Mr(calc):   | Delta     | Sequence                   |
|-------|-------------|-----------|----------------------------|
| 38.3  | 1186.590347 | -0.002499 | <a href="#">ETIEQEK</a>    |
| 8.5   | 1186.572586 | 0.015262  | <a href="#">KEMMKETFK</a>  |
| 6.0   | 1186.601578 | -0.013730 | <a href="#">TNEKQEK</a>    |
| 6.0   | 1186.601578 | -0.013730 | <a href="#">QEQKESK</a>    |
| 5.2   | 1186.586960 | 0.000888  | <a href="#">KLYSQYEEK</a>  |
| 5.0   | 1186.605392 | -0.017544 | <a href="#">KEAEQEAARR</a> |
| 4.8   | 1186.572586 | 0.015262  | <a href="#">KEMMKETFK</a>  |
| 4.8   | 1186.591721 | -0.003873 | <a href="#">KTVGFHSHMK</a> |
| 4.6   | 1186.590347 | -0.002499 | <a href="#">QEEELTK</a>    |
| 3.4   | 1186.605408 | -0.017560 | <a href="#">EVRQENREK</a>  |

Mascot: <http://www.matrixscience.com/>

# MASCOT SEARCH RESULTS

## Peptide View

MS/MS Fragmentation of **SPYQLVLQHSR**

Found in **BGH3\_HUMAN**, Transforming growth factor-beta-induced protein ig-h3 OS=Homo sapiens GN=TGFB1 PE=1 SV=1

Match to Query 32441: 1637.864832 from(546.962220,3+) rtinseconds(1929) index(31304)

Title: Locus:1.1.1.3335.15 File:"2013-07-02 CLN FXIII 180 min 3rd F 3.wiff"

Data file C:\Program Files (x86)\Matrix Science\Mascot Daemon\mgf9 FXIII 180 min 3rd\mascot\_daemon\_merge.mgf

Click mouse within plot area to zoom in by factor of two about that point

Or, Plot from  to  Da

Label all possible matches  Label matches used for scoring

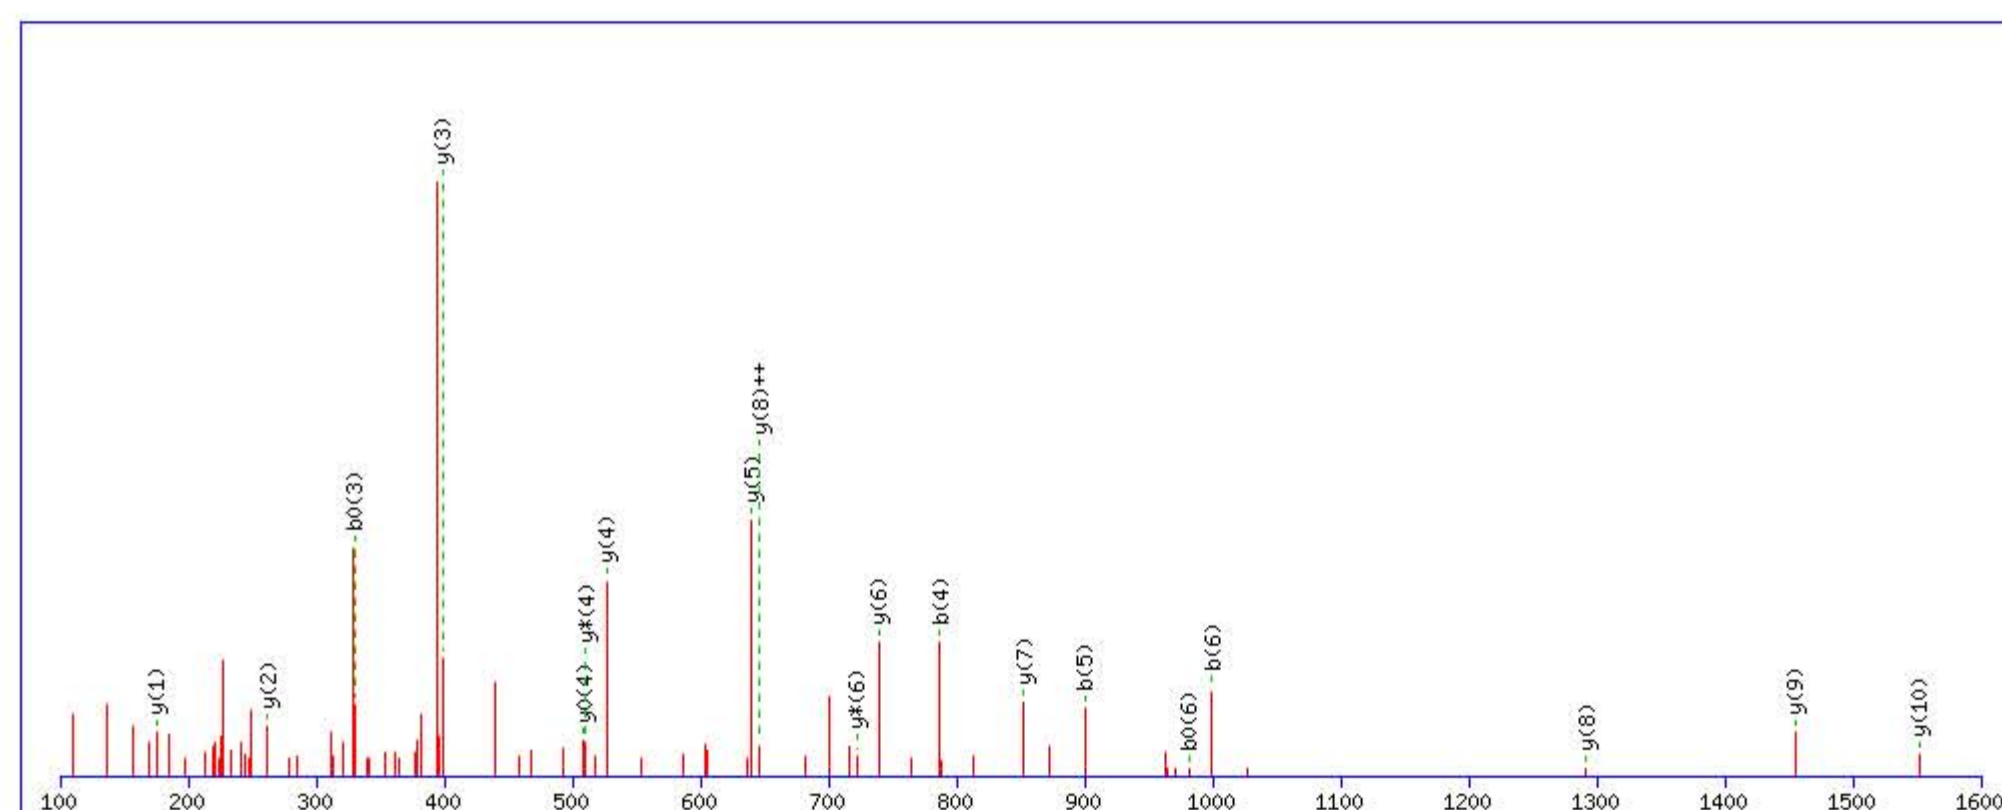

Monoisotopic mass of neutral peptide Mr(calc): 1637.871170

Fixed modifications: Carbamidomethyl (C) (apply to specified residues or termini only)

Variable modifications:

Q4 : Biotin:Thermo-21345 (Q)

Ions Score: 56 Expect: 6.9e-006

Matches : 19/112 fragment ions using 40 most intense peaks [\(help\)](#)

| #  | b           | b <sup>++</sup> | b <sup>*</sup> | b <sup>*++</sup> | b <sup>0</sup> | b <sup>0++</sup> | Seq. | y           | y <sup>++</sup> | y <sup>*</sup> | y <sup>*++</sup> | y <sup>0</sup> | y <sup>0++</sup> | #  |
|----|-------------|-----------------|----------------|------------------|----------------|------------------|------|-------------|-----------------|----------------|------------------|----------------|------------------|----|
| 1  | 88.039304   | 44.523290       |                |                  | 70.028739      | 35.518008        | S    |             |                 |                |                  |                |                  | 11 |
| 2  | 185.092068  | 93.049672       |                |                  | 167.081503     | 84.044389        | P    | 1551.846431 | 776.426853      | 1534.819882    | 767.913579       | 1533.835866    | 767.421571       | 10 |
| 3  | 348.155397  | 174.581336      |                |                  | 330.144832     | 165.576054       | Y    | 1454.793667 | 727.900471      | 1437.767118    | 719.387197       | 1436.783102    | 718.895189       | 9  |
| 4  | 787.380723  | 394.194000      | 770.354174     | 385.680725       | 769.370158     | 385.188717       | Q    | 1291.730338 | 646.368807      | 1274.703789    | 637.855532       | 1273.719773    | 637.363524       | 8  |
| 5  | 900.464787  | 450.736032      | 883.438238     | 442.222757       | 882.454222     | 441.730749       | L    | 852.505012  | 426.756144      | 835.478463     | 418.242869       | 834.494447     | 417.750861       | 7  |
| 6  | 999.533201  | 500.270239      | 982.506652     | 491.756964       | 981.522636     | 491.264956       | V    | 739.420948  | 370.214112      | 722.394399     | 361.700837       | 721.410383     | 361.208829       | 6  |
| 7  | 1112.617265 | 556.812270      | 1095.590716    | 548.298996       | 1094.606700    | 547.806988       | L    | 640.352534  | 320.679905      | 623.325985     | 312.166630       | 622.341969     | 311.674622       | 5  |
| 8  | 1240.675843 | 620.841559      | 1223.649294    | 612.328285       | 1222.665278    | 611.836277       | Q    | 527.268470  | 264.137873      | 510.241921     | 255.624598       | 509.257905     | 255.132590       | 4  |
| 9  | 1377.734755 | 689.371015      | 1360.708206    | 680.857741       | 1359.724190    | 680.365733       | H    | 399.209892  | 200.108584      | 382.183343     | 191.595309       | 381.199327     | 191.103301       | 3  |
| 10 | 1464.766783 | 732.887029      | 1447.740234    | 724.373755       | 1446.756218    | 723.881747       | S    | 262.150980  | 131.579128      | 245.124431     | 123.065854       | 244.140415     | 122.573846       | 2  |
| 11 |             |                 |                |                  |                |                  | R    | 175.118952  | 88.063114       | 158.092403     | 79.549839        |                |                  | 1  |

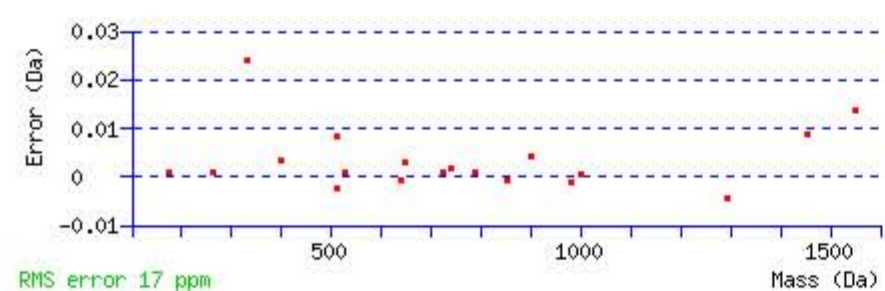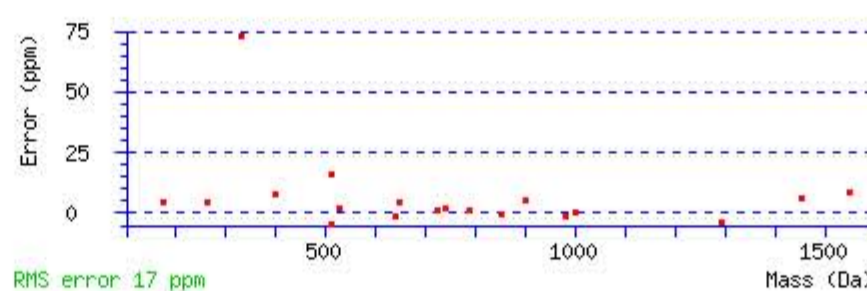

NCBI BLAST search of **SPYQLVLQHSR**

(Parameters: blastp, nr protein database, expect=20000, no filter, PAM30)

Other BLAST [web gateways](#)

### All matches to this query

| Score | Mr(calc):   | Delta     | Sequence                        |
|-------|-------------|-----------|---------------------------------|
| 55.8  | 1637.871170 | -0.006338 | <a href="#">SPYQLVLQHSR</a>     |
| 3.4   | 1637.871170 | -0.006338 | <a href="#">SPYQLVLQHSR</a>     |
| 0.7   | 1637.855911 | 0.008921  | <a href="#">RTAYSGVPMITLSSR</a> |

Mascot: <http://www.matrixscience.com/>

# MASCOT Search Results

## Peptide View

MS/MS Fragmentation of **NLHDLVDSDNQLER**

Found in **VASN\_HUMAN**, Vasorin OS=Homo sapiens GN=VASN PE=1 SV=1

Match to Query 38911: 1977.948522 from(660.323450,3+) rtinseconds(1954) index(18785)

Title: Locus:1.1.1.3246.12 File:"2013-07-02 CLN FXIII 180 min 3rd F 2.wiff"

Data file C:\Program Files (x86)\Matrix Science\Mascot Daemon\mgf9 FXIII 180 min 3rd\mascot\_daemon\_merge.mgf

Click mouse within plot area to zoom in by factor of two about that point

Or, Plot from  to  Da

Label all possible matches  Label matches used for scoring

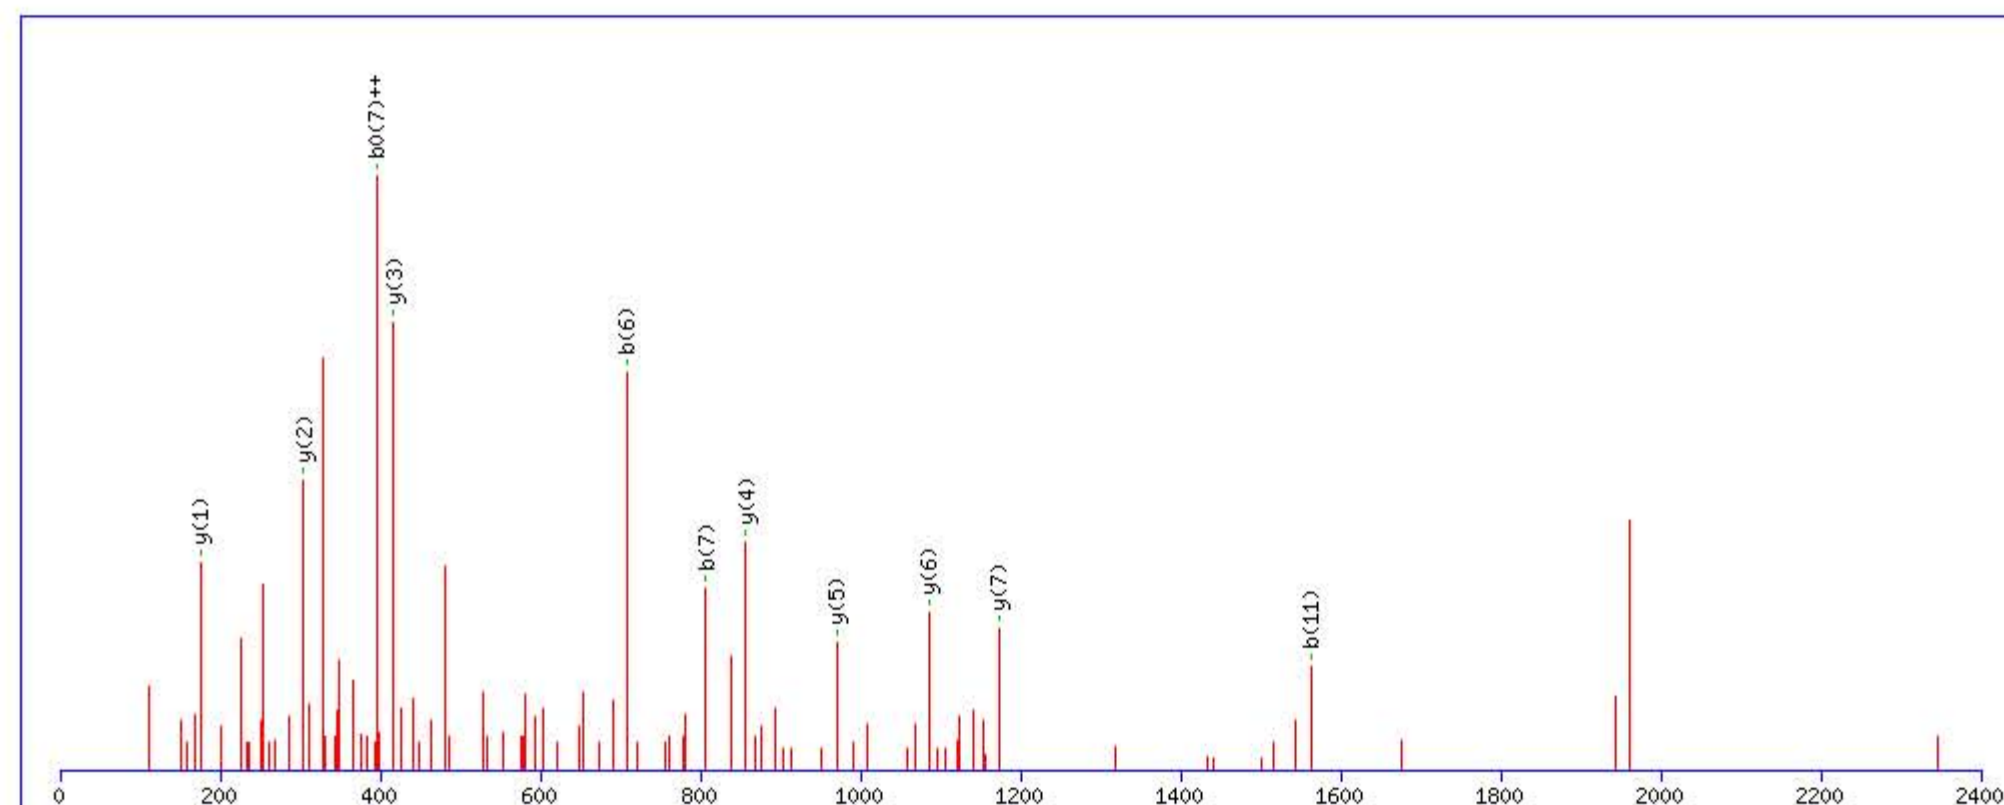

Monoisotopic mass of neutral peptide Mr(calc): 1977.957809

Fixed modifications: Carbamidomethyl (C) (apply to specified residues or termini only)

Variable modifications:

Q11 : Biotin:Thermo-21345 (Q)

Ions Score: 50 Expect: 0.00021

Matches : 11/148 fragment ions using 16 most intense peaks [\(help\)](#)

| #  | b                  | b <sup>++</sup> | b <sup>*</sup> | b <sup>*++</sup> | b <sup>0</sup> | b <sup>0++</sup>  | Seq. | y                  | y <sup>++</sup> | y <sup>*</sup> | y <sup>*++</sup> | y <sup>0</sup> | y <sup>0++</sup> | #  |
|----|--------------------|-----------------|----------------|------------------|----------------|-------------------|------|--------------------|-----------------|----------------|------------------|----------------|------------------|----|
| 1  | 115.050203         | 58.028740       | 98.023654      | 49.515465        |                |                   | N    |                    |                 |                |                  |                |                  | 14 |
| 2  | 228.134267         | 114.570771      | 211.107718     | 106.057497       |                |                   | L    | 1864.922173        | 932.964724      | 1847.895624    | 924.451450       | 1846.911608    | 923.959442       | 13 |
| 3  | 365.193179         | 183.100227      | 348.166630     | 174.586953       |                |                   | H    | 1751.838109        | 876.422692      | 1734.811560    | 867.909418       | 1733.827544    | 867.417410       | 12 |
| 4  | 480.220122         | 240.613699      | 463.193573     | 232.100425       | 462.209557     | 231.608417        | D    | 1614.779197        | 807.893236      | 1597.752648    | 799.379962       | 1596.768632    | 798.887954       | 11 |
| 5  | 593.304186         | 297.155731      | 576.277637     | 288.642457       | 575.293621     | 288.150449        | L    | 1499.752254        | 750.379765      | 1482.725705    | 741.866490       | 1481.741689    | 741.374482       | 10 |
| 6  | <b>708.331129</b>  | 354.669203      | 691.304580     | 346.155928       | 690.320564     | 345.663920        | D    | 1386.668190        | 693.837733      | 1369.641641    | 685.324458       | 1368.657625    | 684.832450       | 9  |
| 7  | <b>807.399543</b>  | 404.203410      | 790.372994     | 395.690135       | 789.388978     | <b>395.198127</b> | V    | 1271.641247        | 636.324261      | 1254.614698    | 627.810987       | 1253.630682    | 627.318979       | 8  |
| 8  | 894.431571         | 447.719424      | 877.405022     | 439.206149       | 876.421006     | 438.714141        | S    | <b>1172.572833</b> | 586.790054      | 1155.546284    | 578.276780       | 1154.562268    | 577.784772       | 7  |
| 9  | 1009.458514        | 505.232895      | 992.431965     | 496.719620       | 991.447949     | 496.227612        | D    | <b>1085.540805</b> | 543.274040      | 1068.514256    | 534.760766       | 1067.530240    | 534.268758       | 6  |
| 10 | 1123.501441        | 562.254358      | 1106.474892    | 553.741084       | 1105.490876    | 553.249076        | N    | <b>970.513862</b>  | 485.760569      | 953.487313     | 477.247294       | 952.503297     | 476.755286       | 5  |
| 11 | <b>1562.726767</b> | 781.867021      | 1545.700218    | 773.353747       | 1544.716202    | 772.861739        | Q    | <b>856.470935</b>  | 428.739105      | 839.444386     | 420.225831       | 838.460370     | 419.733823       | 4  |
| 12 | 1675.810831        | 838.409053      | 1658.784282    | 829.895779       | 1657.800266    | 829.403771        | L    | <b>417.245609</b>  | 209.126442      | 400.219060     | 200.613168       | 399.235044     | 200.121160       | 3  |
| 13 | 1804.853424        | 902.930350      | 1787.826875    | 894.417075       | 1786.842859    | 893.925067        | E    | <b>304.161545</b>  | 152.584410      | 287.134996     | 144.071136       | 286.150980     | 143.579128       | 2  |
| 14 |                    |                 |                |                  |                |                   | R    | <b>175.118952</b>  | 88.063114       | 158.092403     | 79.549839        |                |                  | 1  |

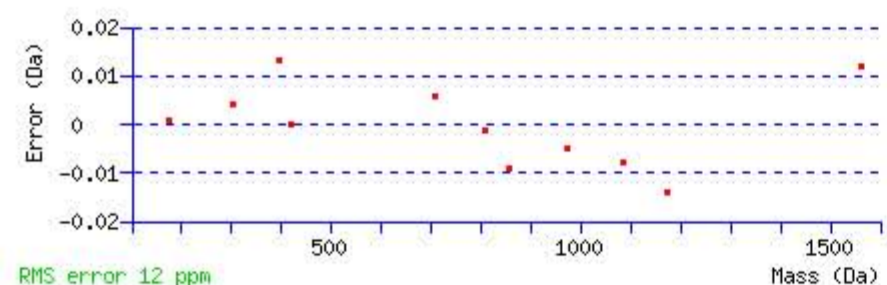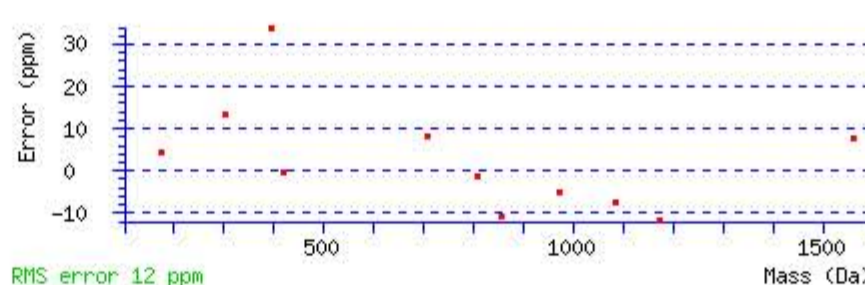

NCBI BLAST search of **NLHDLVDSDNQLER**

(Parameters: blastp, nr protein database, expect=20000, no filter, PAM30)

Other BLAST [web gateways](#)

All matches to this query

| Score | Mr(calc):   | Delta     | Sequence                       |
|-------|-------------|-----------|--------------------------------|
| 49.8  | 1977.957809 | -0.009287 | <a href="#">NLHDLVDSDNQLER</a> |

Mascot: <http://www.matrixscience.com/>

# MASCOT SEARCH RESULTS

## Peptide View

MS/MS Fragmentation of **LAGLGLQLDEGLFSR**

Found in **VASN\_HUMAN**, Vasorin OS=Homo sapiens GN=VASN PE=1 SV=1

Match to Query 40328: 2027.088852 from(676.703560,3+) rtinseconds(2838) index(23948)

Title: Locus:1.1.1.3552.4 File:"2013-07-02 CLN FXIII 180 min 3rd F 2.wiff"

Data file C:\Program Files (x86)\Matrix Science\Mascot Daemon\mgf\9 FXIII 180 min 3rd\mascot\_daemon\_merge.mgf

Click mouse within plot area to zoom in by factor of two about that point

Or, Plot from  to  Da

Label all possible matches  Label matches used for scoring

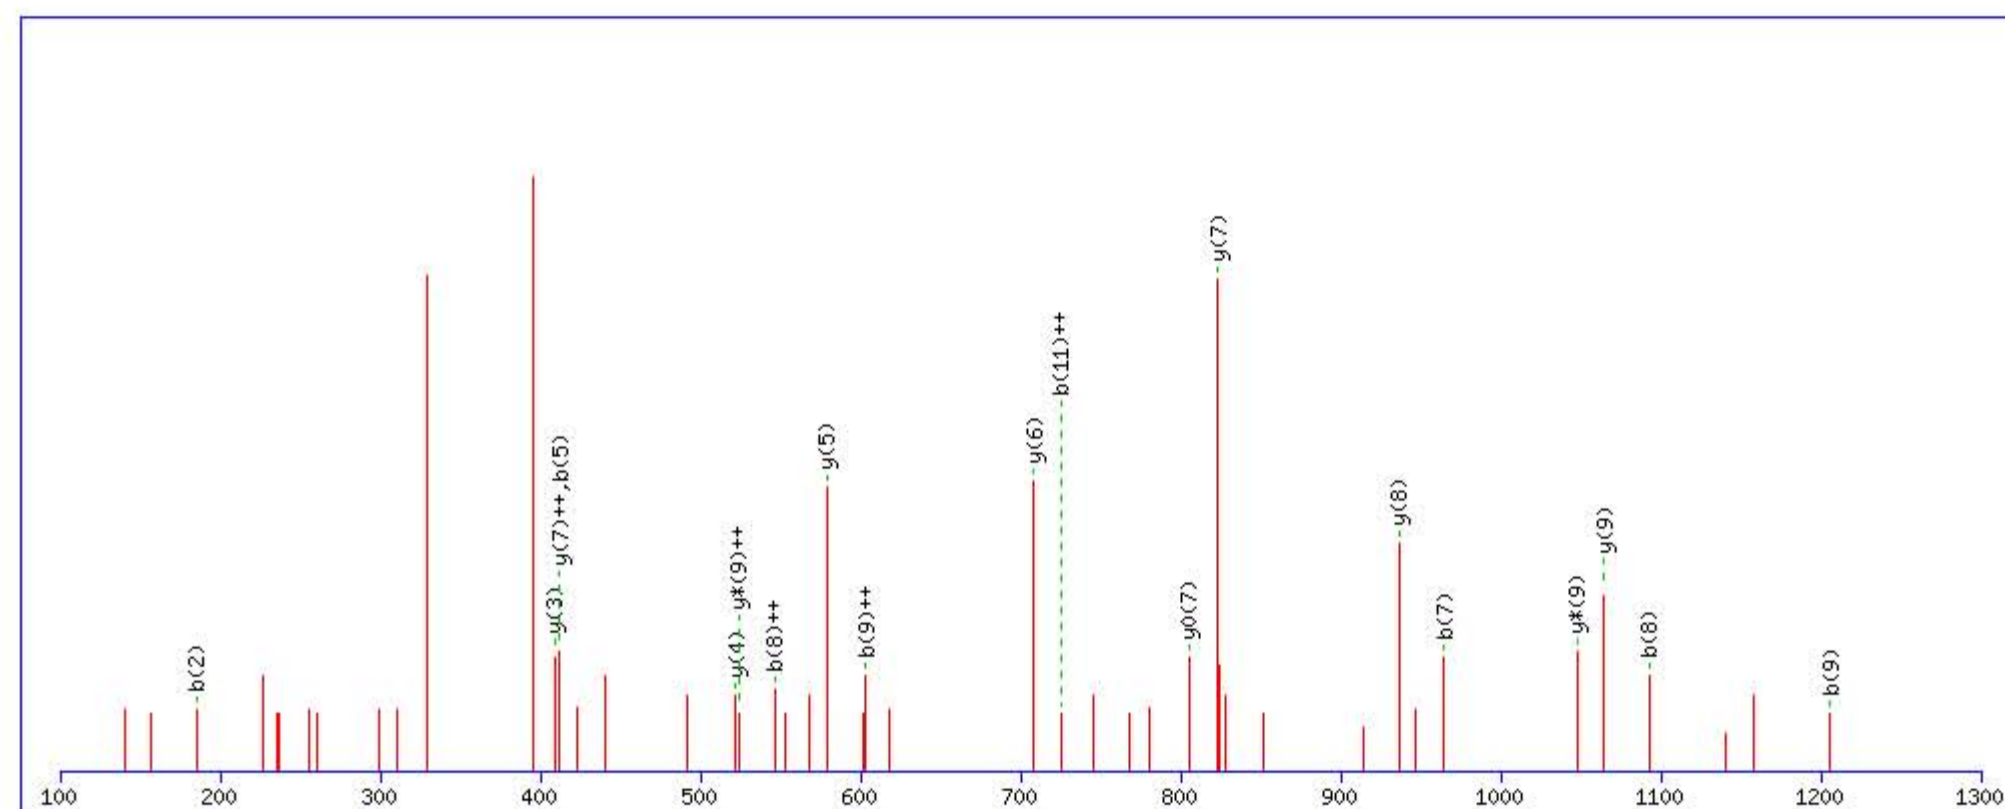

Monoisotopic mass of neutral peptide Mr(calc): 2027.087372

Fixed modifications: Carbamidomethyl (C) (apply to specified residues or termini only)

Variable modifications:

Q7 : Biotin:Thermo-21345 (Q)

Ions Score: 37 Expect: 0.0046

Matches : 19/148 fragment ions using 30 most intense peaks [\(help\)](#)

| #  | b                  | b <sup>++</sup>   | b <sup>*</sup> | b <sup>*++</sup> | b <sup>0</sup> | b <sup>0++</sup> | Seq. | y                  | y <sup>++</sup>   | y <sup>*</sup>     | y <sup>*++</sup>  | y <sup>0</sup>    | y <sup>0++</sup> | #  |
|----|--------------------|-------------------|----------------|------------------|----------------|------------------|------|--------------------|-------------------|--------------------|-------------------|-------------------|------------------|----|
| 1  | 114.091340         | 57.549308         |                |                  |                |                  | L    |                    |                   |                    |                   |                   |                  | 16 |
| 2  | <b>185.128454</b>  | 93.067865         |                |                  |                |                  | A    | 1915.010596        | 958.008936        | 1897.984047        | 949.495662        | 1897.000031       | 949.003654       | 15 |
| 3  | 242.149918         | 121.578597        |                |                  |                |                  | G    | 1843.973482        | 922.490379        | 1826.946933        | 913.977105        | 1825.962917       | 913.485097       | 14 |
| 4  | 355.233982         | 178.120629        |                |                  |                |                  | L    | 1786.952018        | 893.979647        | 1769.925469        | 885.466373        | 1768.941453       | 884.974364       | 13 |
| 5  | <b>412.255446</b>  | 206.631361        |                |                  |                |                  | G    | 1673.867954        | 837.437615        | 1656.841405        | 828.924341        | 1655.857389       | 828.432333       | 12 |
| 6  | 525.339510         | 263.173393        |                |                  |                |                  | L    | 1616.846490        | 808.926883        | 1599.819941        | 800.413609        | 1598.835925       | 799.921601       | 11 |
| 7  | <b>964.564836</b>  | 482.786056        | 947.538287     | 474.272782       |                |                  | Q    | 1503.762426        | 752.384851        | 1486.735877        | 743.871577        | 1485.751861       | 743.379569       | 10 |
| 8  | <b>1092.623414</b> | <b>546.815345</b> | 1075.596865    | 538.302071       |                |                  | Q    | <b>1064.537100</b> | 532.772188        | <b>1047.510551</b> | <b>524.258914</b> | 1046.526535       | 523.766906       | 9  |
| 9  | <b>1205.707478</b> | <b>603.357377</b> | 1188.680929    | 594.844102       |                |                  | L    | <b>936.478522</b>  | 468.742899        | 919.451973         | 460.229625        | 918.467957        | 459.737617       | 8  |
| 10 | 1320.734421        | 660.870848        | 1303.707872    | 652.357574       | 1302.723856    | 651.865566       | D    | <b>823.394458</b>  | <b>412.200867</b> | 806.367909         | 403.687593        | <b>805.383893</b> | 403.195585       | 7  |
| 11 | 1449.777014        | <b>725.392145</b> | 1432.750465    | 716.878871       | 1431.766449    | 716.386863       | E    | <b>708.367515</b>  | 354.687396        | 691.340966         | 346.174121        | 690.356950        | 345.682113       | 6  |
| 12 | 1506.798478        | 753.902877        | 1489.771929    | 745.389603       | 1488.787913    | 744.897594       | G    | <b>579.324922</b>  | 290.166099        | 562.298373         | 281.652825        | 561.314357        | 281.160817       | 5  |
| 13 | 1619.882542        | 810.444909        | 1602.855993    | 801.931634       | 1601.871977    | 801.439626       | L    | <b>522.303458</b>  | 261.655367        | 505.276909         | 253.142093        | 504.292893        | 252.650085       | 4  |
| 14 | 1766.950956        | 883.979116        | 1749.924407    | 875.465842       | 1748.940391    | 874.973833       | F    | <b>409.219394</b>  | 205.113335        | 392.192845         | 196.600061        | 391.208829        | 196.108053       | 3  |
| 15 | 1853.982984        | 927.495130        | 1836.956435    | 918.981856       | 1835.972419    | 918.489848       | S    | 262.150980         | 131.579128        | 245.124431         | 123.065854        | 244.140415        | 122.573846       | 2  |
| 16 |                    |                   |                |                  |                |                  | R    | 175.118952         | 88.063114         | 158.092403         | 79.549839         |                   |                  | 1  |

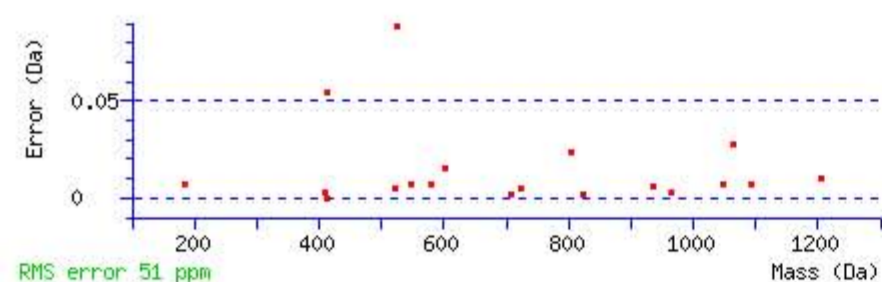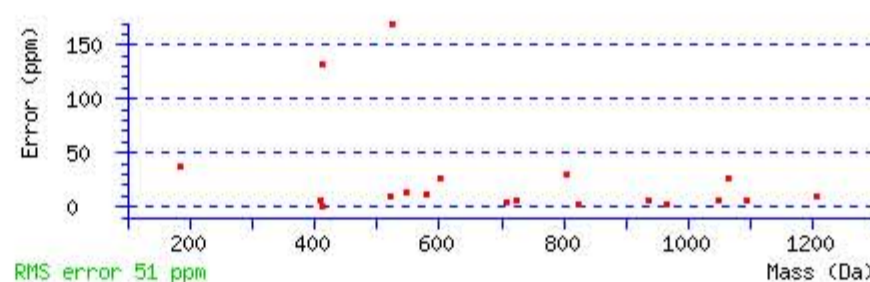

NCBI BLAST search of [LAGLGLQLDEGLFSR](#)

(Parameters: blastp, nr protein database, expect=20000, no filter, PAM30)

Other BLAST [web gateways](#)

### All matches to this query

| Score | Mr(calc):   | Delta    | Sequence                        |
|-------|-------------|----------|---------------------------------|
| 36.7  | 2027.087372 | 0.001480 | <a href="#">LAGLGLQLDEGLFSR</a> |
| 22.5  | 2027.087372 | 0.001480 | <a href="#">LAGLGLQLDEGLFSR</a> |



# Mascot Search Results

## Peptide View

MS/MS Fragmentation of **FEDCCQEK**

Found in **VTDB\_HUMAN**, Vitamin D-binding protein OS=Homo sapiens GN=GC PE=1 SV=1

Match to Query 25123: 1425.568248 from(713.791400,2+) rtinseconds(1492) index(28763)

Title: Locus:1.1.1.3182.15 File:"2013-07-02 CLN FXIII 180 min 3rd F 3.wiff"

Data file C:\Program Files (x86)\Matrix Science\Mascot Daemon\mgf\9 FXIII 180 min 3rd\mascot\_daemon\_merge.mgf

Click mouse within plot area to zoom in by factor of two about that point

Or, Plot from  to  Da

Label all possible matches  Label matches used for scoring

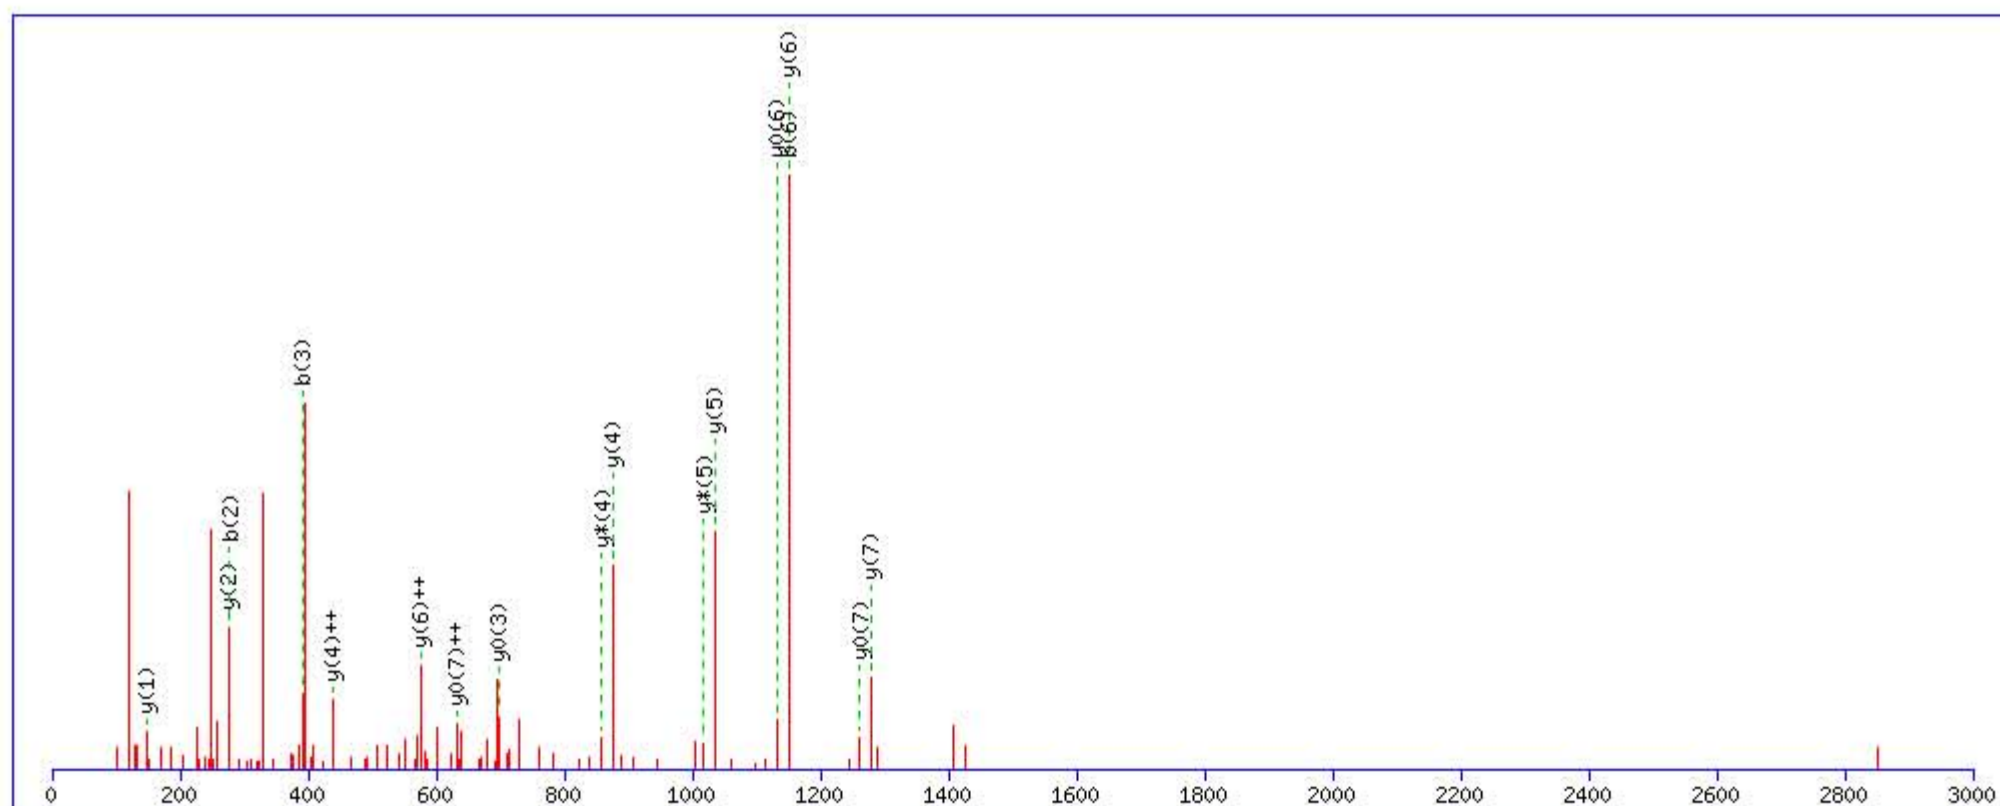

Monoisotopic mass of neutral peptide Mr(calc): 1425.572693

Fixed modifications: Carbamidomethyl (C) (apply to specified residues or termini only)

Variable modifications:

Q6 : Biotin:Thermo-21345 (Q)

Ions Score: 28 Expect: 0.0014

Matches : 17/70 fragment ions using 36 most intense peaks [\(help\)](#)

| # | b                  | b <sup>++</sup> | b <sup>+</sup> | b <sup>+++</sup> | b <sup>0</sup> | b <sup>0++</sup> | Seq. | y                  | y <sup>++</sup>   | y <sup>+</sup>     | y <sup>+++</sup> | y <sup>0</sup>     | y <sup>0++</sup>  | # |
|---|--------------------|-----------------|----------------|------------------|----------------|------------------|------|--------------------|-------------------|--------------------|------------------|--------------------|-------------------|---|
| 1 | 148.075690         | 74.541483       |                |                  |                |                  | F    |                    |                   |                    |                  |                    |                   | 8 |
| 2 | <b>277.118283</b>  | 139.062779      |                |                  | 259.107718     | 130.057497       | E    | <b>1279.511557</b> | 640.259417        | 1262.485008        | 631.746142       | <b>1261.500992</b> | <b>631.254134</b> | 7 |
| 3 | <b>392.145226</b>  | 196.576251      |                |                  | 374.134661     | 187.570968       | D    | <b>1150.468964</b> | <b>575.738120</b> | 1133.442415        | 567.224846       | <b>1132.458399</b> | 566.732838        | 6 |
| 4 | 552.175875         | 276.591576      |                |                  | 534.165310     | 267.586293       | C    | <b>1035.442021</b> | 518.224649        | <b>1018.415472</b> | 509.711374       | 1017.431456        | 509.219366        | 5 |
| 5 | 712.206524         | 356.606900      |                |                  | 694.195959     | 347.601618       | C    | <b>875.411372</b>  | <b>438.209324</b> | <b>858.384823</b>  | 429.696050       | 857.400807         | 429.204042        | 4 |
| 6 | <b>1151.431850</b> | 576.219563      | 1134.405301    | 567.706289       | 1133.421285    | 567.214281       | Q    | 715.380723         | 358.194000        | 698.354174         | 349.680725       | <b>697.370158</b>  | 349.188717        | 3 |
| 7 | 1280.474443        | 640.740860      | 1263.447894    | 632.227585       | 1262.463878    | 631.735577       | E    | <b>276.155397</b>  | 138.581337        | 259.128848         | 130.068062       | 258.144832         | 129.576054        | 2 |
| 8 |                    |                 |                |                  |                |                  | K    | <b>147.112804</b>  | 74.060040         | 130.086255         | 65.546765        |                    |                   | 1 |

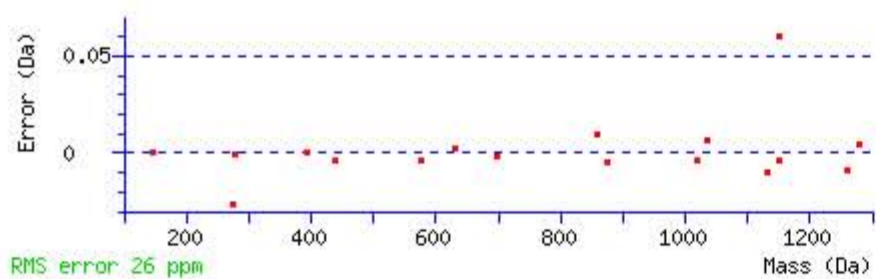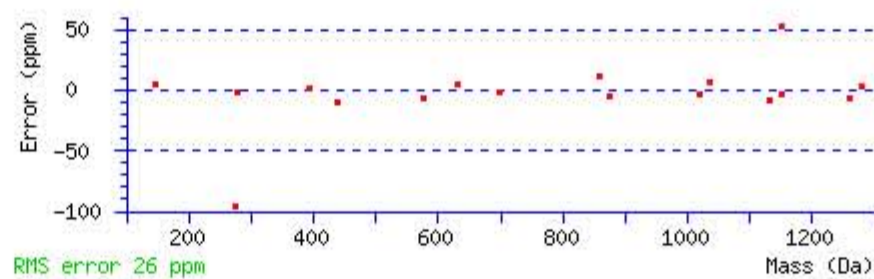

NCBI BLAST search of [FEDCCQEK](#)

(Parameters: blastp, nr protein database, expect=20000, no filter, PAM30)

Other BLAST [web gateways](#)

All matches to this query

| Score | Mr(calc):   | Delta     | Sequence                 |
|-------|-------------|-----------|--------------------------|
| 28.4  | 1425.572693 | -0.004445 | <a href="#">FEDCCQEK</a> |

Mascot: <http://www.matrixscience.com/>

# MASCOT SEARCH RESULTS

## Peptide View

MS/MS Fragmentation of **VCSQYAAYGEK**

Found in **VTDB\_HUMAN**, Vitamin D-binding protein OS=Homo sapiens GN=GC PE=1 SV=1

Match to Query 29956: 1585.728728 from(793.871640,2+) rtinseconds(1658) index(58775)

Title: Locus:1.1.1.1488.12 File:"2013-07-02 CLN FXIII 180 min 3rd FT.wiff"

Data file C:\Program Files (x86)\Matrix Science\Mascot Daemon\mgf\9 FXIII 180 min 3rd\mascot\_daemon\_merge.mgf

Click mouse within plot area to zoom in by factor of two about that point

Or, Plot from  to  Da

Label all possible matches  Label matches used for scoring

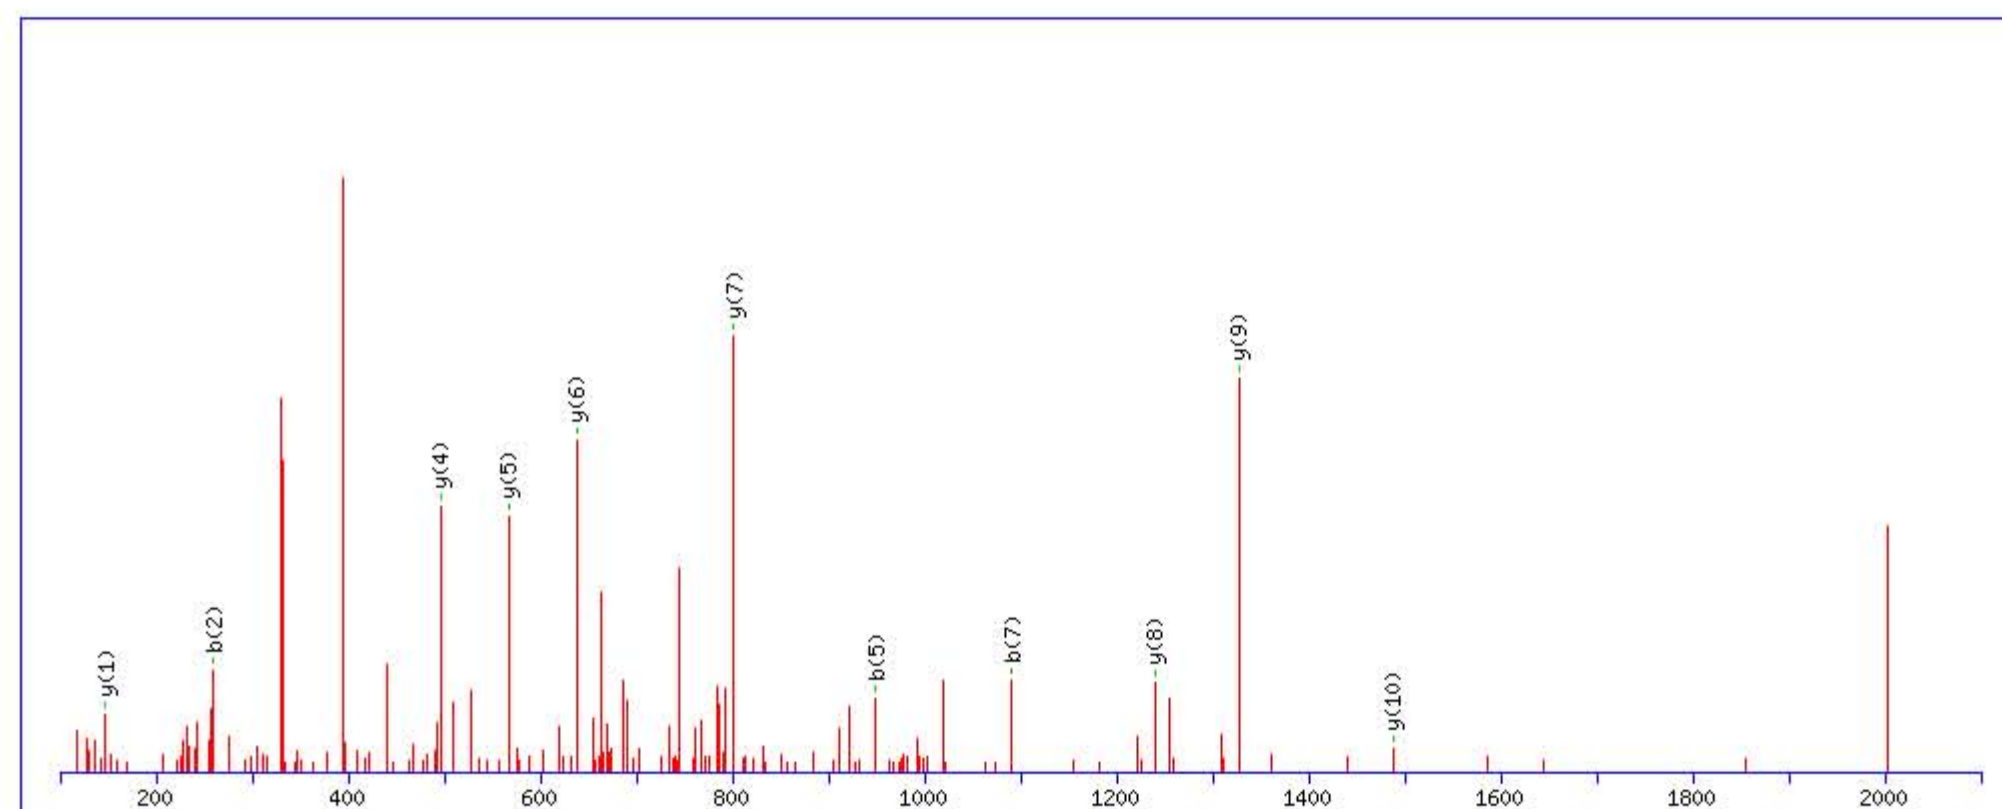

Monoisotopic mass of neutral peptide Mr(calc): 1585.726868

Fixed modifications: Carbamidomethyl (C) (apply to specified residues or termini only)

Variable modifications:

Q4 : Biotin:Thermo-21345 (Q)

Ions Score: 66 Expect: 2.4e-006

Matches : 11/108 fragment ions using 14 most intense peaks [\(help\)](#)

| #  | b                  | b <sup>++</sup> | b <sup>*</sup> | b <sup>*++</sup> | b <sup>0</sup> | b <sup>0++</sup> | Seq. | y                  | y <sup>++</sup> | y <sup>*</sup> | y <sup>*++</sup> | y <sup>0</sup> | y <sup>0++</sup> | #  |
|----|--------------------|-----------------|----------------|------------------|----------------|------------------|------|--------------------|-----------------|----------------|------------------|----------------|------------------|----|
| 1  | 100.075690         | 50.541483       |                |                  |                |                  | V    |                    |                 |                |                  |                |                  | 11 |
| 2  | <b>260.106339</b>  | 130.556807      |                |                  |                |                  | C    | <b>1487.665750</b> | 744.336513      | 1470.639201    | 735.823239       | 1469.655185    | 735.331231       | 10 |
| 3  | 347.138367         | 174.072821      |                |                  | 329.127802     | 165.067539       | S    | <b>1327.635101</b> | 664.321189      | 1310.608552    | 655.807914       | 1309.624536    | 655.315906       | 9  |
| 4  | 786.363693         | 393.685485      | 769.337144     | 385.172210       | 768.353128     | 384.680202       | Q    | <b>1240.603073</b> | 620.805175      | 1223.576524    | 612.291900       | 1222.592508    | 611.799892       | 8  |
| 5  | <b>949.427022</b>  | 475.217149      | 932.400473     | 466.703875       | 931.416457     | 466.211867       | Y    | <b>801.377747</b>  | 401.192512      | 784.351198     | 392.679237       | 783.367182     | 392.187229       | 7  |
| 6  | 1020.464136        | 510.735706      | 1003.437587    | 502.222432       | 1002.453571    | 501.730424       | A    | <b>638.314418</b>  | 319.660847      | 621.287869     | 311.147573       | 620.303853     | 310.655565       | 6  |
| 7  | <b>1091.501250</b> | 546.254263      | 1074.474701    | 537.740989       | 1073.490685    | 537.248981       | A    | <b>567.277304</b>  | 284.142290      | 550.250755     | 275.629016       | 549.266739     | 275.137008       | 5  |
| 8  | 1254.564579        | 627.785928      | 1237.538030    | 619.272653       | 1236.554014    | 618.780645       | Y    | <b>496.240190</b>  | 248.623733      | 479.213641     | 240.110459       | 478.229625     | 239.618451       | 4  |
| 9  | 1311.586043        | 656.296660      | 1294.559494    | 647.783385       | 1293.575478    | 647.291377       | G    | 333.176861         | 167.092069      | 316.150312     | 158.578794       | 315.166296     | 158.086786       | 3  |
| 10 | 1440.628636        | 720.817956      | 1423.602087    | 712.304682       | 1422.618071    | 711.812674       | E    | 276.155397         | 138.581337      | 259.128848     | 130.068062       | 258.144832     | 129.576054       | 2  |
| 11 |                    |                 |                |                  |                |                  | K    | <b>147.112804</b>  | 74.060040       | 130.086255     | 65.546765        |                |                  | 1  |

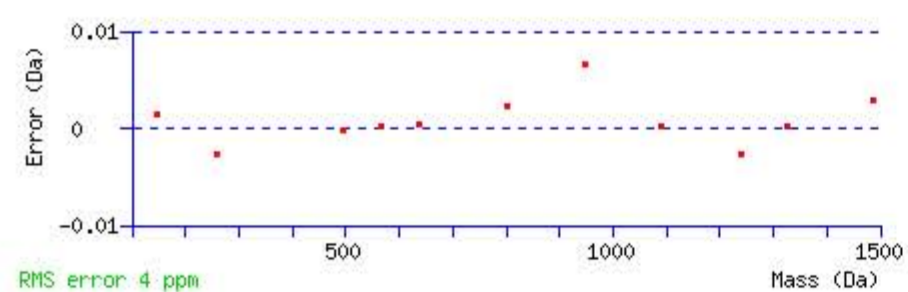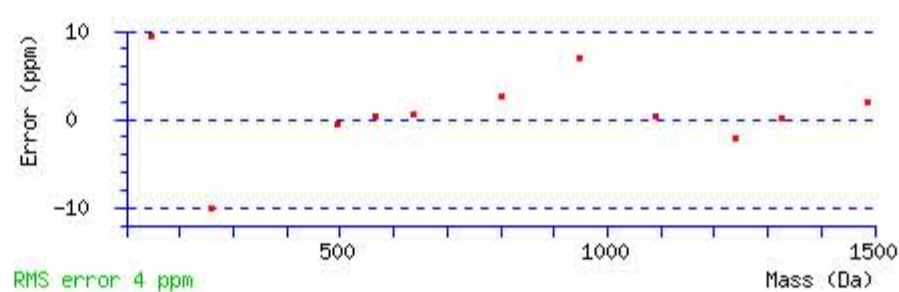

NCBI BLAST search of **VCSQYAAYGEK**

(Parameters: blastp, nr protein database, expect=20000, no filter, PAM30)

Other BLAST [web gateways](#)

All matches to this query

| Score | Mr(calc):   | Delta     | Sequence                         |
|-------|-------------|-----------|----------------------------------|
| 66.1  | 1585.726868 | 0.001860  | <a href="#">VCSQYAAYGEK</a>      |
| 21.9  | 1585.744614 | -0.015886 | <a href="#">MSVNYYAAGLSPYADK</a> |
| 3.8   | 1585.747986 | -0.019258 | <a href="#">MKMGQEFVESKEK</a>    |

Mascot: <http://www.matrixscience.com/>

# MASCOT Search Results

## Peptide View

MS/MS Fragmentation of **KFPSGTFEQVSQLVK**

Found in **VTDB\_HUMAN**, Vitamin D-binding protein OS=Homo sapiens GN=GC PE=1 SV=1

Match to Query 39974: 2005.075032 from(669.365620,3+) rtinseconds(2242) index(61938)

Title: Locus:1.1.1.1692.17 File:"2013-07-02 CLN FXIII 180 min 3rd FT.wiff"

Data file C:\Program Files (x86)\Matrix Science\Mascot Daemon\mgf9 FXIII 180 min 3rd\mascot\_daemon\_merge.mgf

Click mouse within plot area to zoom in by factor of two about that point

Or, Plot from  to  Da

Label all possible matches  Label matches used for scoring

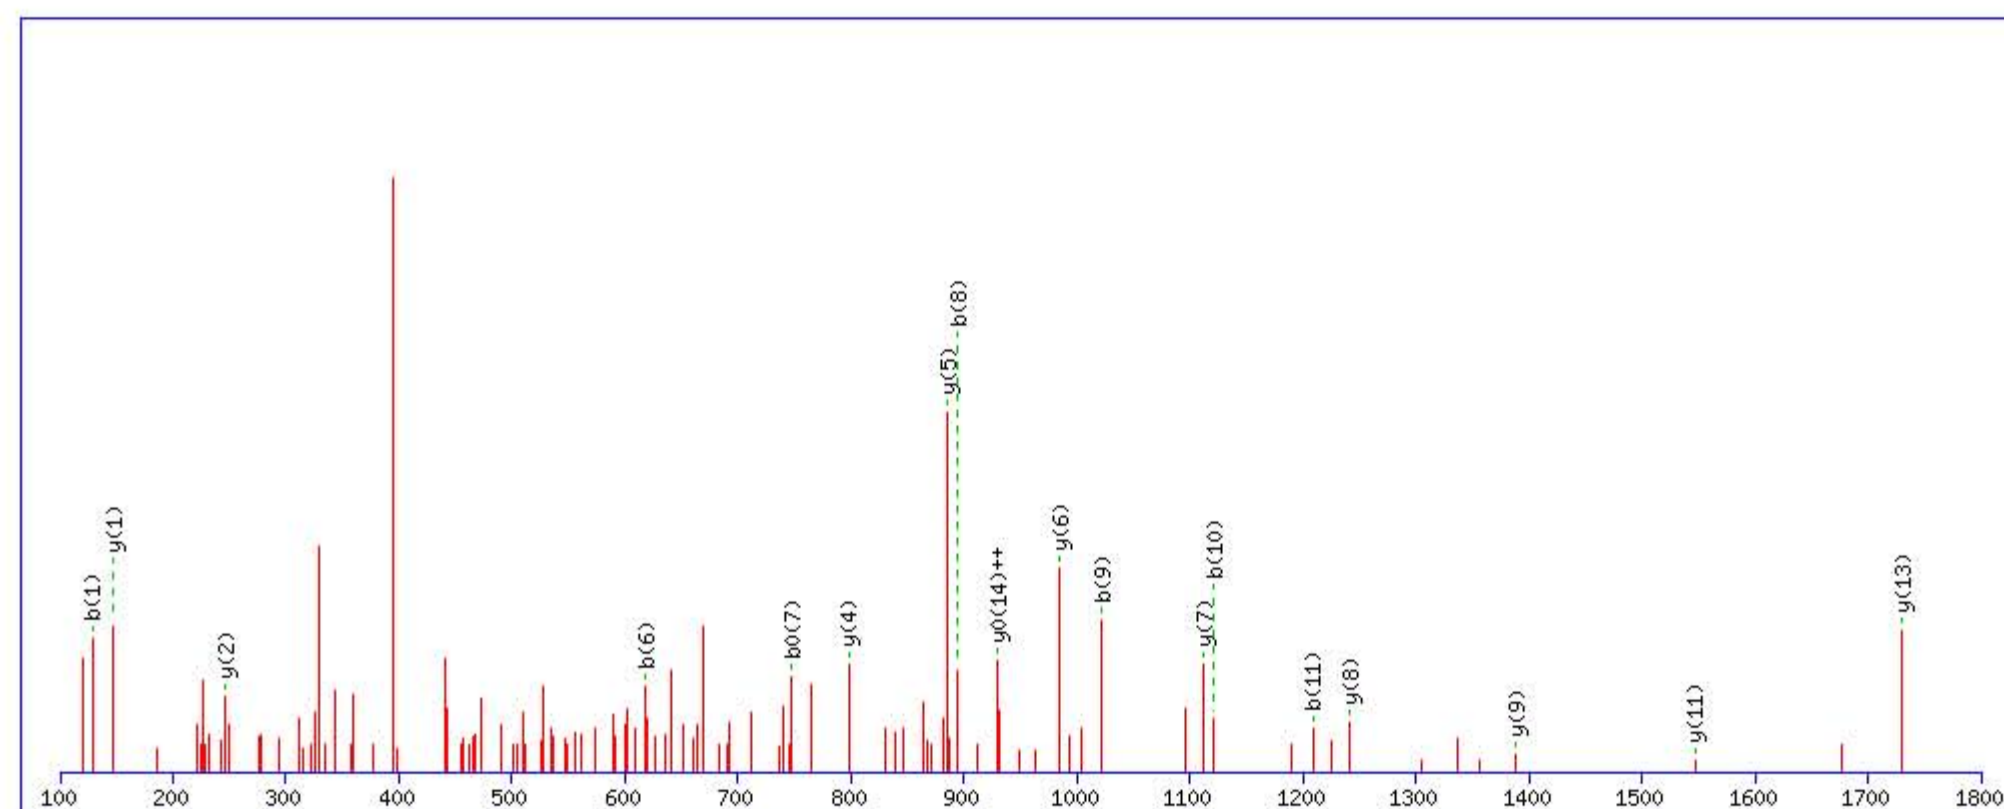

Monoisotopic mass of neutral peptide Mr(calc): 2005.070679

Fixed modifications: Carbamidomethyl (C) (apply to specified residues or termini only)

Variable modifications:

Q12 : Biotin:Thermo-21345 (Q)

Ions Score: 65 Expect: 7e-006

Matches : 19/154 fragment ions using 29 most intense peaks [\(help\)](#)

| #  | b                  | b <sup>++</sup>   | b <sup>+</sup> | b <sup>+++</sup> | b <sup>0</sup>    | b <sup>0++</sup> | Seq.     | y                  | y <sup>++</sup> | y <sup>+</sup> | y <sup>+++</sup> | y <sup>0</sup> | y <sup>0++</sup>  | #         |
|----|--------------------|-------------------|----------------|------------------|-------------------|------------------|----------|--------------------|-----------------|----------------|------------------|----------------|-------------------|-----------|
| 1  | <b>129.102239</b>  | 65.054757         | 112.075690     | 56.541483        |                   |                  | <b>K</b> |                    |                 |                |                  |                |                   | <b>15</b> |
| 2  | 276.170653         | 138.588964        | 259.144104     | 130.075690       |                   |                  | <b>F</b> | 1877.982984        | 939.495130      | 1860.956435    | 930.981856       | 1859.972419    | <b>930.489848</b> | <b>14</b> |
| 3  | 373.223417         | 187.115346        | 356.196868     | 178.602072       |                   |                  | <b>P</b> | <b>1730.914570</b> | 865.960923      | 1713.888021    | 857.447649       | 1712.904005    | 856.955641        | <b>13</b> |
| 4  | 460.255445         | 230.631360        | 443.228896     | 222.118086       | 442.244880        | 221.626078       | <b>S</b> | 1633.861806        | 817.434541      | 1616.835257    | 808.921267       | 1615.851241    | 808.429259        | <b>12</b> |
| 5  | 517.276909         | 259.142093        | 500.250360     | 250.628818       | 499.266344        | 250.136810       | <b>G</b> | <b>1546.829778</b> | 773.918527      | 1529.803229    | 765.405253       | 1528.819213    | 764.913245        | <b>11</b> |
| 6  | <b>618.324588</b>  | 309.665932        | 601.298039     | 301.152658       | 600.314023        | 300.660650       | <b>T</b> | 1489.808314        | 745.407795      | 1472.781765    | 736.894521       | 1471.797749    | 736.402513        | <b>10</b> |
| 7  | 765.393002         | 383.200139        | 748.366453     | 374.686865       | <b>747.382437</b> | 374.194857       | <b>F</b> | <b>1388.760635</b> | 694.883956      | 1371.734086    | 686.370681       | 1370.750070    | 685.878673        | <b>9</b>  |
| 8  | <b>894.435595</b>  | 447.721436        | 877.409046     | 439.208161       | 876.425030        | 438.716153       | <b>E</b> | <b>1241.692221</b> | 621.349749      | 1224.665672    | 612.836474       | 1223.681656    | 612.344466        | <b>8</b>  |
| 9  | <b>1022.494173</b> | 511.750725        | 1005.467624    | 503.237450       | 1004.483608       | 502.745442       | <b>Q</b> | <b>1112.649628</b> | 556.828452      | 1095.623079    | 548.315178       | 1094.639063    | 547.823170        | <b>7</b>  |
| 10 | <b>1121.562587</b> | 561.284932        | 1104.536038    | 552.771657       | 1103.552022       | 552.279649       | <b>V</b> | <b>984.591050</b>  | 492.799163      | 967.564501     | 484.285889       | 966.580485     | 483.793881        | <b>6</b>  |
| 11 | <b>1208.594615</b> | 604.800946        | 1191.568066    | 596.287671       | 1190.584050       | 595.795663       | <b>S</b> | <b>885.522636</b>  | 443.264956      | 868.496087     | 434.751682       | 867.512071     | 434.259674        | <b>5</b>  |
| 12 | 1647.819941        | 824.413609        | 1630.793392    | 815.900334       | 1629.809376       | 815.408326       | <b>Q</b> | <b>798.490608</b>  | 399.748942      | 781.464059     | 391.235668       |                |                   | <b>4</b>  |
| 13 | 1760.904005        | 880.955641        | 1743.877456    | 872.442366       | 1742.893440       | 871.950358       | <b>L</b> | 359.265282         | 180.136279      | 342.238733     | 171.623004       |                |                   | <b>3</b>  |
| 14 | 1859.972419        | <b>930.489848</b> | 1842.945870    | 921.976573       | 1841.961854       | 921.484565       | <b>V</b> | <b>246.181218</b>  | 123.594247      | 229.154669     | 115.080973       |                |                   | <b>2</b>  |
| 15 |                    |                   |                |                  |                   |                  | <b>K</b> | <b>147.112804</b>  | 74.060040       | 130.086255     | 65.546765        |                |                   | <b>1</b>  |

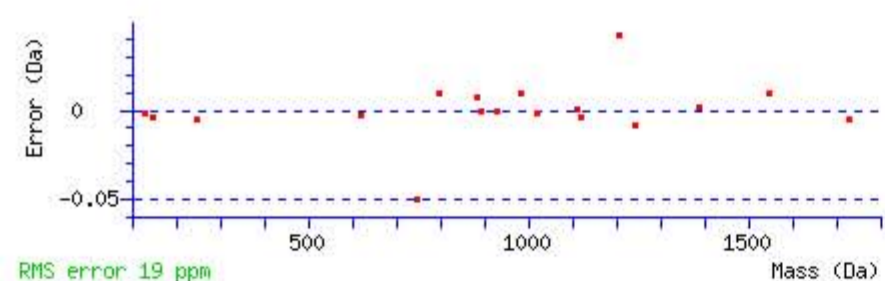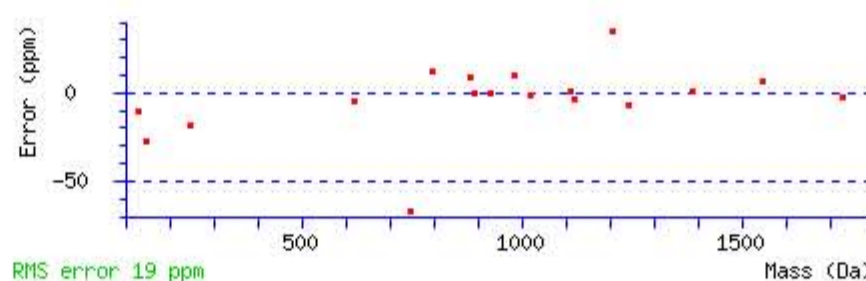

NCBI BLAST search of [KFPSGTFEQVSQLVK](#)

(Parameters: blastp, nr protein database, expect=20000, no filter, PAM30)

Other BLAST [web gateways](#)

All matches to this query

| Score | Mr(calc):   | Delta    | Sequence                        |
|-------|-------------|----------|---------------------------------|
| 64.9  | 2005.070679 | 0.004353 | <a href="#">KFPSGTFEQVSQLVK</a> |
| 25.1  | 2005.070679 | 0.004353 | <a href="#">KFPSGTFEQVSQLVK</a> |

Mascot: <http://www.matrixscience.com/>

# MATRIX SCIENCE Mascot Search Results

## Peptide View

MS/MS Fragmentation of **KFPSGTFEQVSQLVK**

Found in **VTDB\_HUMAN**, Vitamin D-binding protein OS=Homo sapiens GN=GC PE=1 SV=1

Match to Query 39976: 2005.076172 from(669.366000,3+) rtinseconds(2305) index(62257)

Title: Locus:1.1.1.1714.10 File:"2013-07-02 CLN FXIII 180 min 3rd FT.wiff"

Data file C:\Program Files (x86)\Matrix Science\Mascot Daemon\mgf9 FXIII 180 min 3rd\mascot\_daemon\_merge.mgf

Click mouse within plot area to zoom in by factor of two about that point

Or, Plot from  to  Da

Label all possible matches  Label matches used for scoring

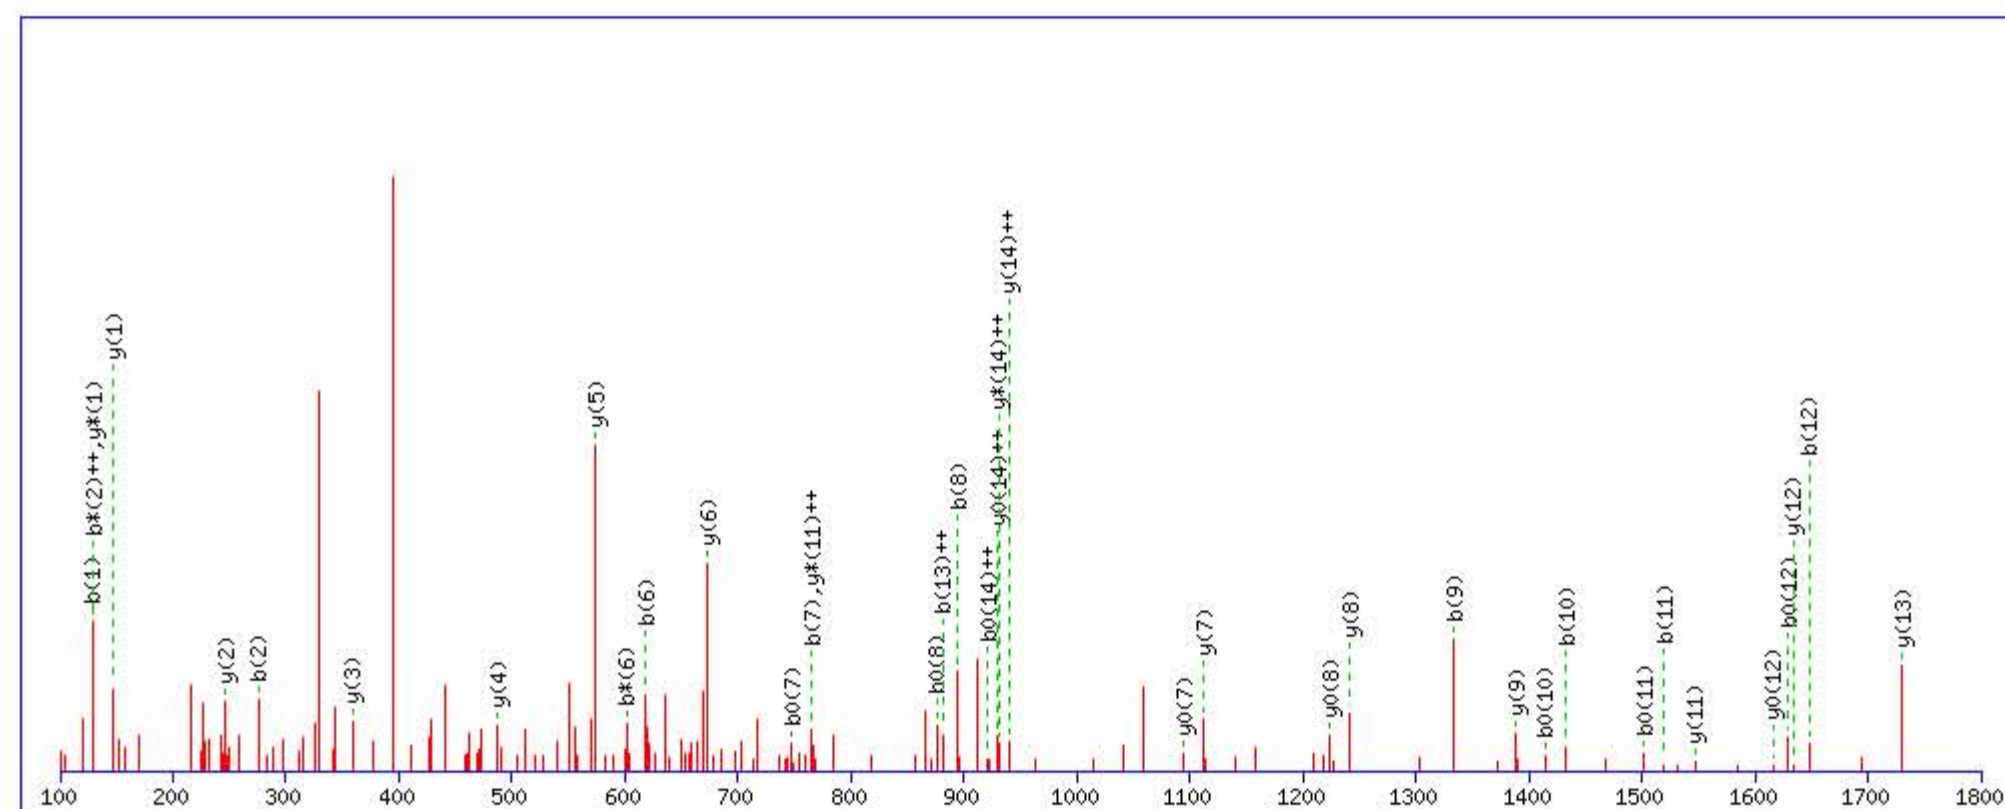

Monoisotopic mass of neutral peptide Mr(calc): 2005.070679

Fixed modifications: Carbamidomethyl (C) (apply to specified residues or termini only)

Variable modifications:

Q9 : Biotin:Thermo-21345 (Q)

Ions Score: 55 Expect: 1e-005

Matches : 39/154 fragment ions using 79 most intense peaks [\(help\)](#)

| #  | b           | b <sup>++</sup> | b <sup>*</sup> | b <sup>*++</sup> | b <sup>0</sup> | b <sup>0++</sup> | Seq. | y           | y <sup>++</sup> | y <sup>*</sup> | y <sup>*++</sup> | y <sup>0</sup> | y <sup>0++</sup> | #  |
|----|-------------|-----------------|----------------|------------------|----------------|------------------|------|-------------|-----------------|----------------|------------------|----------------|------------------|----|
| 1  | 129.102239  | 65.054757       | 112.075690     | 56.541483        |                |                  | K    |             |                 |                |                  |                |                  | 15 |
| 2  | 276.170653  | 138.588964      | 259.144104     | 130.075690       |                |                  | F    | 1877.982984 | 939.495130      | 1860.956435    | 930.981856       | 1859.972419    | 930.489848       | 14 |
| 3  | 373.223417  | 187.115346      | 356.196868     | 178.602072       |                |                  | P    | 1730.914570 | 865.960923      | 1713.888021    | 857.447649       | 1712.904005    | 856.955641       | 13 |
| 4  | 460.255445  | 230.631360      | 443.228896     | 222.118086       | 442.244880     | 221.626078       | S    | 1633.861806 | 817.434541      | 1616.835257    | 808.921267       | 1615.851241    | 808.429259       | 12 |
| 5  | 517.276909  | 259.142093      | 500.250360     | 250.628818       | 499.266344     | 250.136810       | G    | 1546.829778 | 773.918527      | 1529.803229    | 765.405253       | 1528.819213    | 764.913245       | 11 |
| 6  | 618.324588  | 309.665932      | 601.298039     | 301.152658       | 600.314023     | 300.660650       | T    | 1489.808314 | 745.407795      | 1472.781765    | 736.894521       | 1471.797749    | 736.402513       | 10 |
| 7  | 765.393002  | 383.200139      | 748.366453     | 374.686865       | 747.382437     | 374.194857       | F    | 1388.760635 | 694.883955      | 1371.734086    | 686.370681       | 1370.750070    | 685.878673       | 9  |
| 8  | 894.435595  | 447.721436      | 877.409046     | 439.208161       | 876.425030     | 438.716153       | E    | 1241.692221 | 621.349749      | 1224.665672    | 612.836474       | 1223.681656    | 612.344466       | 8  |
| 9  | 1333.660921 | 667.334098      | 1316.634372    | 658.820824       | 1315.650356    | 658.328816       | Q    | 1112.649628 | 556.828452      | 1095.623079    | 548.315178       | 1094.639063    | 547.823169       | 7  |
| 10 | 1432.729335 | 716.868306      | 1415.702786    | 708.355031       | 1414.718770    | 707.863023       | V    | 673.424302  | 337.215789      | 656.397753     | 328.702515       | 655.413737     | 328.210507       | 6  |
| 11 | 1519.761363 | 760.384320      | 1502.734814    | 751.871045       | 1501.750798    | 751.379037       | S    | 574.355888  | 287.681582      | 557.329339     | 279.168308       | 556.345323     | 278.676300       | 5  |
| 12 | 1647.819941 | 824.413609      | 1630.793392    | 815.900334       | 1629.809376    | 815.408326       | Q    | 487.323860  | 244.165568      | 470.297311     | 235.652293       |                |                  | 4  |
| 13 | 1760.904005 | 880.955640      | 1743.877456    | 872.442366       | 1742.893440    | 871.950358       | L    | 359.265282  | 180.136279      | 342.238733     | 171.623004       |                |                  | 3  |
| 14 | 1859.972419 | 930.489848      | 1842.945870    | 921.976573       | 1841.961854    | 921.484565       | V    | 246.181218  | 123.594247      | 229.154669     | 115.080973       |                |                  | 2  |
| 15 |             |                 |                |                  |                |                  | K    | 147.112804  | 74.060040       | 130.086255     | 65.546765        |                |                  | 1  |

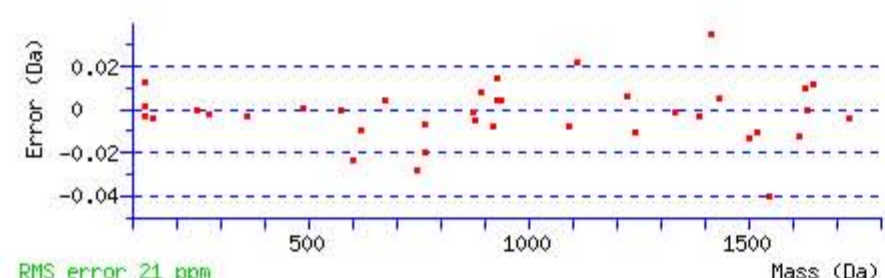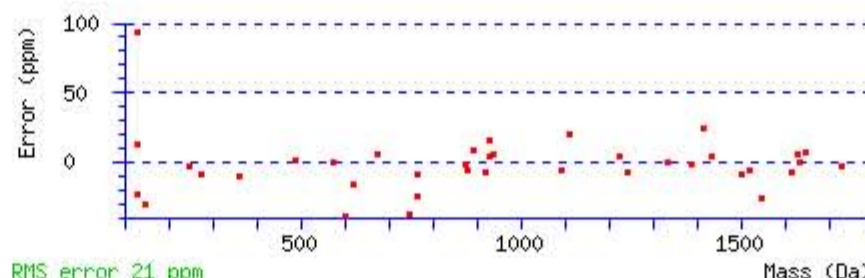

NCBI BLAST search of **KFPSGTFEQVSQLVK**

(Parameters: blastp, nr protein database, expect=20000, no filter, PAM30)

Other BLAST [web gateways](#)

All matches to this query

| Score | Mr(calc):   | Delta     | Sequence                         |
|-------|-------------|-----------|----------------------------------|
| 55.0  | 2005.070679 | 0.005493  | <a href="#">KFPSGTFEQVSQLVK</a>  |
| 25.2  | 2005.070679 | 0.005493  | <a href="#">KFPSGTFEQVSQLVK</a>  |
| 1.8   | 2005.048874 | 0.027298  | <a href="#">KTMSKPGNGQPPVPEK</a> |
| 1.8   | 2005.079193 | -0.003021 | <a href="#">RATWLHQALREGTR</a>   |

# MASCOT Search Results

## Peptide View

MS/MS Fragmentation of **GQELCADYSENTFTEYK**

Found in **VTDB\_HUMAN**, Vitamin D-binding protein OS=Homo sapiens GN=GC PE=1 SV=1

Match to Query 45972: 2365.019022 from(789.346950,3+) rtinseconds(2171) index(32858)

Title: Locus:1.1.1.3419.24 File:"2013-07-02 CLN FXIII 180 min 3rd F 3.wiff"

Data file C:\Program Files (x86)\Matrix Science\Mascot Daemon\mgf\9 FXIII 180 min 3rd\mascot\_daemon\_merge.mgf

Click mouse within plot area to zoom in by factor of two about that point

Or, Plot from  to  Da

Label all possible matches  Label matches used for scoring

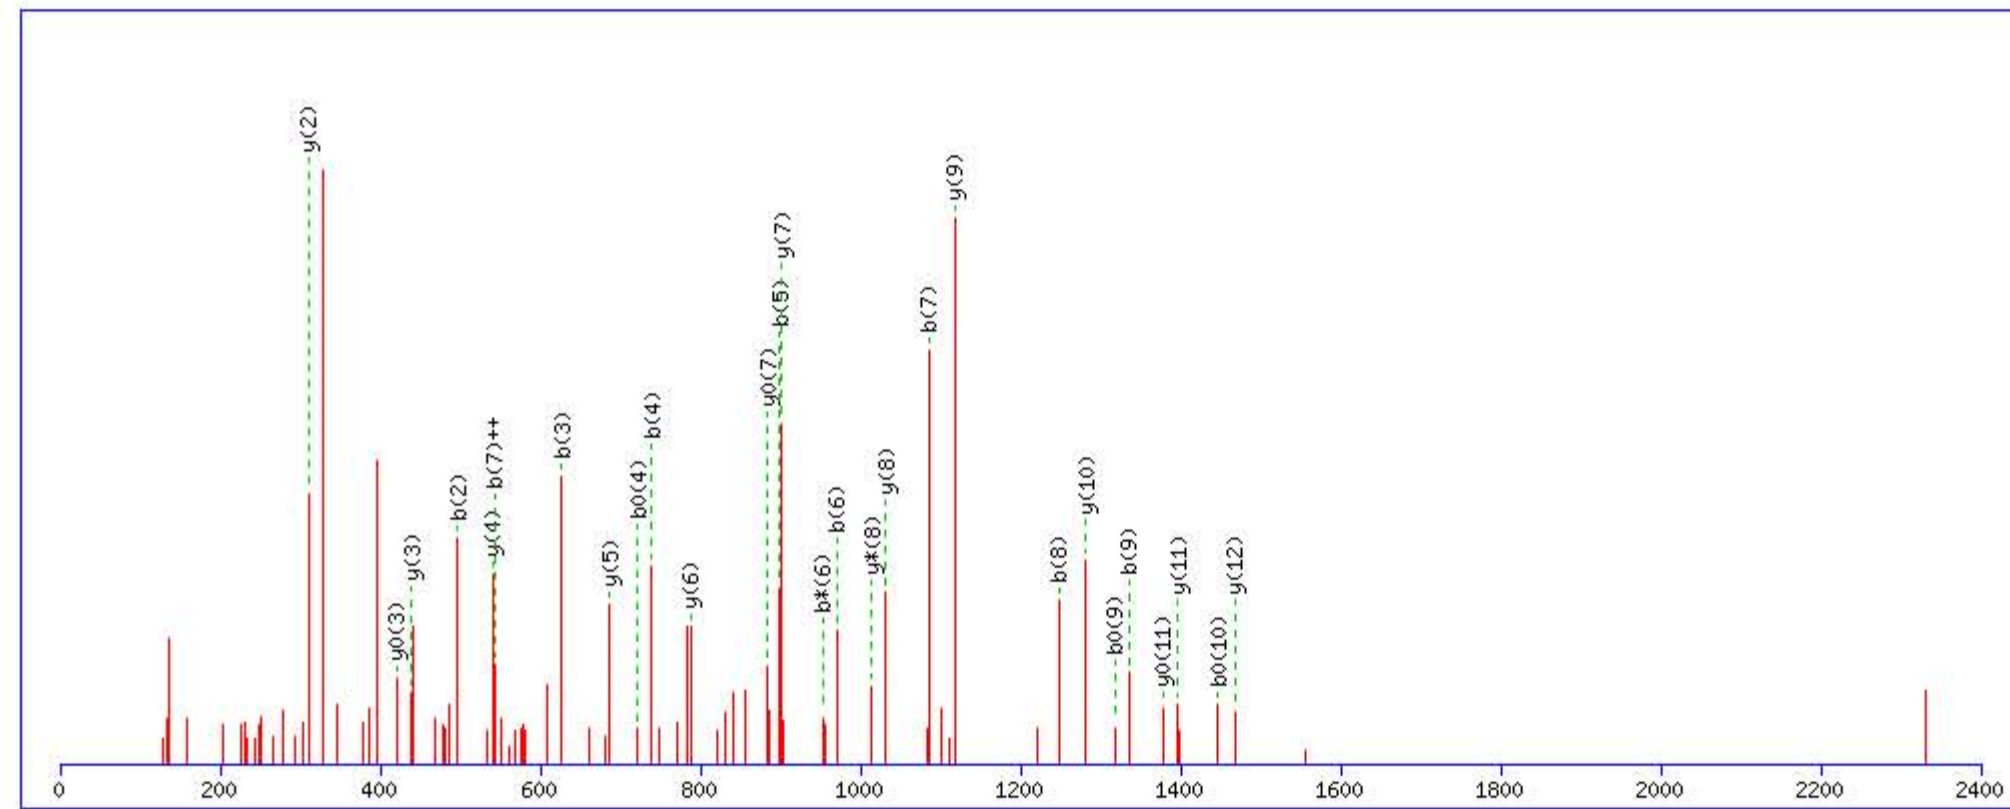

Monoisotopic mass of neutral peptide Mr(calc): 2365.024231

Fixed modifications: Carbamidomethyl (C) (apply to specified residues or termini only)

Variable modifications:

Q2 : Biotin:Thermo-21345 (Q)

Ions Score: 78 Expect: 4.6e-008

Matches : 28/182 fragment ions using 41 most intense peaks [\(help\)](#)

| #  | b                  | b <sup>++</sup>   | b <sup>*</sup>    | b <sup>*++</sup> | b <sup>0</sup>     | b <sup>0++</sup> | Seq. | y                  | y <sup>++</sup> | y <sup>*</sup>     | y <sup>*++</sup> | y <sup>0</sup>     | y <sup>0++</sup> | #  |
|----|--------------------|-------------------|-------------------|------------------|--------------------|------------------|------|--------------------|-----------------|--------------------|------------------|--------------------|------------------|----|
| 1  | 58.028740          | 29.518008         |                   |                  |                    |                  | G    |                    |                 |                    |                  |                    |                  | 17 |
| 2  | <b>497.254066</b>  | 249.130671        | 480.227517        | 240.617397       |                    |                  | Q    | 2309.010064        | 1155.008670     | 2291.983515        | 1146.495395      | 2290.999499        | 1146.003387      | 16 |
| 3  | <b>626.296659</b>  | 313.651968        | 609.270110        | 305.138693       | 608.286094         | 304.646685       | E    | 1869.784738        | 935.396007      | 1852.758189        | 926.882733       | 1851.774173        | 926.390725       | 15 |
| 4  | <b>739.380723</b>  | 370.194000        | 722.354174        | 361.680725       | <b>721.370158</b>  | 361.188717       | L    | 1740.742145        | 870.874711      | 1723.715596        | 862.361436       | 1722.731580        | 861.869428       | 14 |
| 5  | <b>899.411372</b>  | 450.209324        | 882.384823        | 441.696050       | 881.400807         | 441.204042       | C    | 1627.658081        | 814.332679      | 1610.631532        | 805.819404       | 1609.647516        | 805.327396       | 13 |
| 6  | <b>970.448486</b>  | 485.727881        | <b>953.421937</b> | 477.214607       | 952.437921         | 476.722599       | A    | <b>1467.627432</b> | 734.317354      | 1450.600883        | 725.804080       | 1449.616867        | 725.312072       | 12 |
| 7  | <b>1085.475429</b> | <b>543.241353</b> | 1068.448880       | 534.728078       | 1067.464864        | 534.236070       | D    | <b>1396.590318</b> | 698.798797      | 1379.563769        | 690.285523       | <b>1378.579753</b> | 689.793515       | 11 |
| 8  | <b>1248.538758</b> | 624.773017        | 1231.512209       | 616.259743       | 1230.528193        | 615.767735       | Y    | <b>1281.563375</b> | 641.285326      | 1264.536826        | 632.772051       | 1263.552810        | 632.280043       | 10 |
| 9  | <b>1335.570786</b> | 668.289031        | 1318.544237       | 659.775757       | <b>1317.560221</b> | 659.283749       | S    | <b>1118.500046</b> | 559.753661      | 1101.473497        | 551.240387       | 1100.489481        | 550.748379       | 9  |
| 10 | 1464.613379        | 732.810328        | 1447.586830       | 724.297053       | <b>1446.602814</b> | 723.805045       | E    | <b>1031.468018</b> | 516.237647      | <b>1014.441469</b> | 507.724373       | 1013.457453        | 507.232365       | 8  |
| 11 | 1578.656306        | 789.831791        | 1561.629757       | 781.318517       | 1560.645741        | 780.826509       | N    | <b>902.425425</b>  | 451.716351      | 885.398876         | 443.203076       | <b>884.414860</b>  | 442.711068       | 7  |
| 12 | 1679.703985        | 840.355631        | 1662.677436       | 831.842356       | 1661.693420        | 831.350348       | T    | <b>788.382498</b>  | 394.694887      | 771.355949         | 386.181613       | 770.371933         | 385.689605       | 6  |
| 13 | 1826.772399        | 913.889838        | 1809.745850       | 905.376563       | 1808.761834        | 904.884555       | F    | <b>687.334819</b>  | 344.171048      | 670.308270         | 335.657773       | 669.324254         | 335.165765       | 5  |
| 14 | 1927.820078        | 964.413677        | 1910.793529       | 955.900403       | 1909.809513        | 955.408395       | T    | <b>540.266405</b>  | 270.636841      | 523.239856         | 262.123566       | 522.255840         | 261.631558       | 4  |
| 15 | 2056.862671        | 1028.934973       | 2039.836122       | 1020.421699      | 2038.852106        | 1019.929691      | E    | <b>439.218726</b>  | 220.113001      | 422.192177         | 211.599726       | <b>421.208161</b>  | 211.107718       | 3  |
| 16 | 2219.926000        | 1110.466638       | 2202.899451       | 1101.953363      | 2201.915435        | 1101.461355      | Y    | <b>310.176133</b>  | 155.591705      | 293.149584         | 147.078430       |                    |                  | 2  |
| 17 |                    |                   |                   |                  |                    |                  | K    | 147.112804         | 74.060040       | 130.086255         | 65.546765        |                    |                  | 1  |

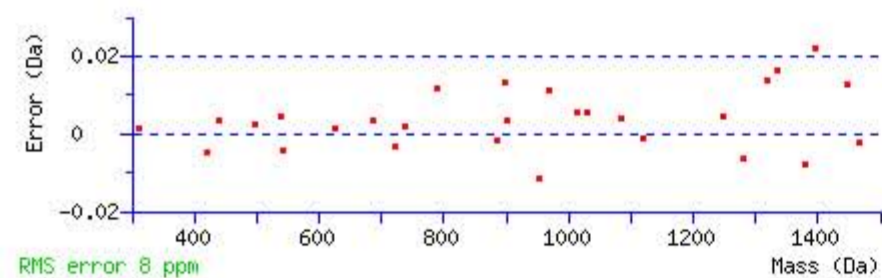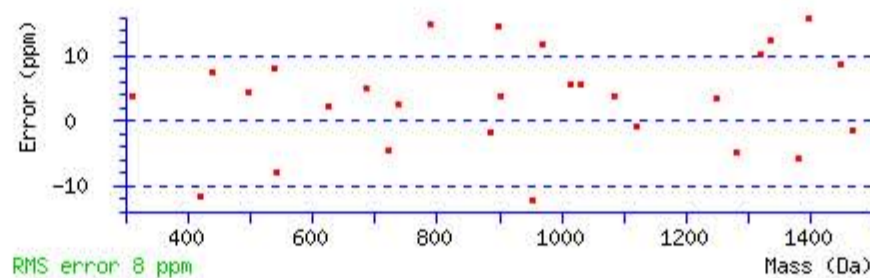

NCBI BLAST search of [GQELCADYSENTFTEYK](#)

(Parameters: blastp, nr protein database, expect=20000, no filter, PAM30)

Other BLAST [web gateways](#)

## All matches to this query

| Score | Mr(calc):   | Delta     | Sequence                          |
|-------|-------------|-----------|-----------------------------------|
| 78.2  | 2365.024231 | -0.005209 | <a href="#">GQELCADYSENTFTEYK</a> |

Mascot: <http://www.matrixscience.com/>

# MASCOT Search Results

## Peptide View

MS/MS Fragmentation of **HQPQEFPTYVEPTNDEICEAFR**

Found in **VTDB\_HUMAN**, Vitamin D-binding protein OS=Homo sapiens GN=GC PE=1 SV=1

Match to Query 54130: 3017.398992 from(1006.806940,3+) rtinseconds(2363) index(62491)

Title: Locus:1.1.1.1734.14 File:"2013-07-02 CLN FXIII 180 min 3rd FT.wiff"

Data file C:\Program Files (x86)\Matrix Science\Mascot Daemon\mgf9 FXIII 180 min 3rd\mascot\_daemon\_merge.mgf

Click mouse within plot area to zoom in by factor of two about that point

Or, Plot from  to  Da

Label all possible matches  Label matches used for scoring

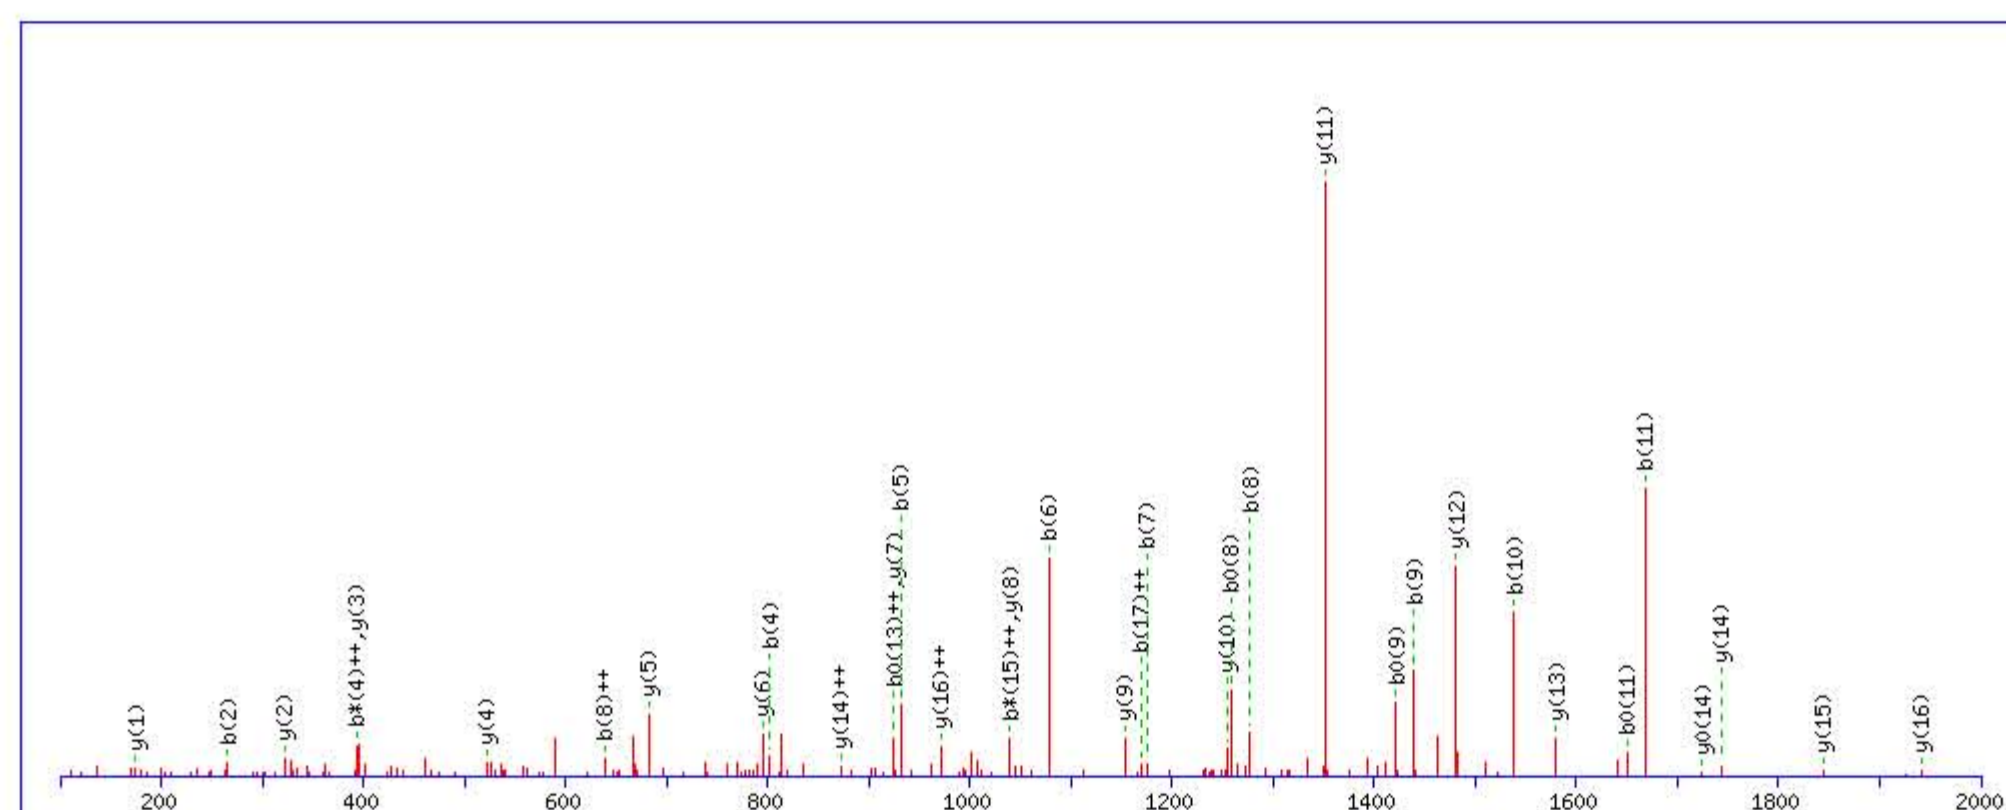

Monoisotopic mass of neutral peptide Mr(calc): 3017.368774

Fixed modifications: Carbamidomethyl (C) (apply to specified residues or termini only)

Variable modifications:

Q4 : Biotin:Thermo-21345 (Q)

Ions Score: 104 Expect: 2.2e-010

Matches : 36/236 fragment ions using 55 most intense peaks [\(help\)](#)

| #  | b                  | b <sup>++</sup>    | b <sup>+</sup> | b <sup>+++</sup>   | b <sup>0</sup>     | b <sup>0++</sup>  | Seq. | y                  | y <sup>++</sup>   | y <sup>+</sup> | y <sup>+++</sup> | y <sup>0</sup>     | y <sup>0++</sup> | #  |
|----|--------------------|--------------------|----------------|--------------------|--------------------|-------------------|------|--------------------|-------------------|----------------|------------------|--------------------|------------------|----|
| 1  | 138.066188         | 69.536732          |                |                    |                    |                   | H    |                    |                   |                |                  |                    |                  | 22 |
| 2  | <b>266.124766</b>  | 133.566021         | 249.098217     | 125.052746         |                    |                   | Q    | 2881.317146        | 1441.162211       | 2864.290597    | 1432.648936      | 2863.306581        | 1432.156928      | 21 |
| 3  | 363.177530         | 182.092403         | 346.150981     | 173.579129         |                    |                   | P    | 2753.258568        | 1377.132922       | 2736.232019    | 1368.619647      | 2735.248003        | 1368.127639      | 20 |
| 4  | <b>802.402856</b>  | 401.705066         | 785.376307     | <b>393.191792</b>  |                    |                   | Q    | 2656.205804        | 1328.606540       | 2639.179255    | 1320.093265      | 2638.195239        | 1319.601257      | 19 |
| 5  | <b>931.445449</b>  | 466.226363         | 914.418900     | 457.713088         | 913.434884         | 457.221080        | E    | 2216.980478        | 1108.993877       | 2199.953929    | 1100.480602      | 2198.969913        | 1099.988594      | 18 |
| 6  | <b>1078.513863</b> | 539.760570         | 1061.487314    | 531.247295         | 1060.503298        | 530.755287        | F    | 2087.937885        | 1044.472580       | 2070.911336    | 1035.959306      | 2069.927320        | 1035.467298      | 17 |
| 7  | <b>1175.566627</b> | 588.286952         | 1158.540078    | 579.773677         | 1157.556062        | 579.281669        | P    | <b>1940.869471</b> | <b>970.938374</b> | 1923.842922    | 962.425099       | 1922.858906        | 961.933091       | 16 |
| 8  | <b>1276.614306</b> | <b>638.810791</b>  | 1259.587757    | 630.297517         | <b>1258.603741</b> | 629.805509        | T    | <b>1843.816707</b> | 922.411992        | 1826.790158    | 913.898717       | 1825.806142        | 913.406709       | 15 |
| 9  | <b>1439.677635</b> | 720.342456         | 1422.651086    | 711.829181         | <b>1421.667070</b> | 711.337173        | Y    | <b>1742.769028</b> | <b>871.888152</b> | 1725.742479    | 863.374878       | <b>1724.758463</b> | 862.882870       | 14 |
| 10 | <b>1538.746049</b> | 769.876663         | 1521.719500    | 761.363388         | 1520.735484        | 760.871380        | V    | <b>1579.705699</b> | 790.356488        | 1562.679150    | 781.843213       | 1561.695134        | 781.351205       | 13 |
| 11 | <b>1667.788642</b> | 834.397959         | 1650.762093    | 825.884685         | <b>1649.778077</b> | 825.392677        | E    | <b>1480.637285</b> | 740.822281        | 1463.610736    | 732.309006       | 1462.626720        | 731.816998       | 12 |
| 12 | 1764.841406        | 882.924341         | 1747.814857    | 874.411067         | 1746.830841        | 873.919059        | P    | <b>1351.594692</b> | 676.300984        | 1334.568143    | 667.787710       | 1333.584127        | 667.295702       | 11 |
| 13 | 1865.889085        | 933.448181         | 1848.862536    | 924.934906         | 1847.878520        | <b>924.442898</b> | T    | <b>1254.541928</b> | 627.774602        | 1237.515379    | 619.261328       | 1236.531363        | 618.769320       | 10 |
| 14 | 1979.932012        | 990.469644         | 1962.905463    | 981.956370         | 1961.921447        | 981.464362        | N    | <b>1153.494249</b> | 577.250763        | 1136.467700    | 568.737488       | 1135.483684        | 568.245480       | 9  |
| 15 | 2094.958955        | 1047.983115        | 2077.932406    | <b>1039.469841</b> | 2076.948390        | 1038.977833       | D    | <b>1039.451322</b> | 520.229299        | 1022.424773    | 511.716025       | 1021.440757        | 511.224017       | 8  |
| 16 | 2224.001548        | 1112.504412        | 2206.974999    | 1103.991137        | 2205.990983        | 1103.499130       | E    | <b>924.424379</b>  | 462.715828        | 907.397830     | 454.202553       | 906.413814         | 453.710545       | 7  |
| 17 | 2337.085612        | <b>1169.046444</b> | 2320.059063    | 1160.533170        | 2319.075047        | 1160.041162       | I    | <b>795.381786</b>  | 398.194531        | 778.355237     | 389.681257       | 777.371221         | 389.189249       | 6  |
| 18 | 2497.116261        | 1249.061769        | 2480.089712    | 1240.548494        | 2479.105696        | 1240.056486       | C    | <b>682.297722</b>  | 341.652499        | 665.271173     | 333.139225       | 664.287157         | 332.647217       | 5  |
| 19 | 2626.158854        | 1313.583065        | 2609.132305    | 1305.069791        | 2608.148289        | 1304.577783       | E    | <b>522.267073</b>  | 261.637175        | 505.240524     | 253.123900       | 504.256508         | 252.631892       | 4  |
| 20 | 2697.195968        | 1349.101622        | 2680.169419    | 1340.588348        | 2679.185403        | 1340.096340       | A    | <b>393.224480</b>  | 197.115878        | 376.197931     | 188.602603       |                    |                  | 3  |
| 21 | 2844.264382        | 1422.635829        | 2827.237833    | 1414.122555        | 2826.253817        | 1413.630547       | F    | <b>322.187366</b>  | 161.597321        | 305.160817     | 153.084046       |                    |                  | 2  |
| 22 |                    |                    |                |                    |                    |                   | R    | <b>175.118952</b>  | 88.063114         | 158.092403     | 79.549839        |                    |                  | 1  |

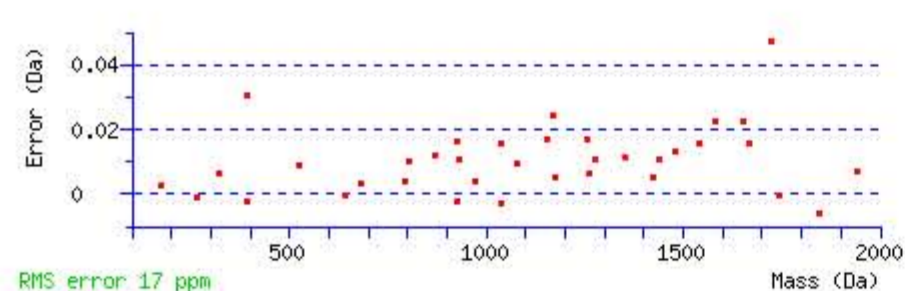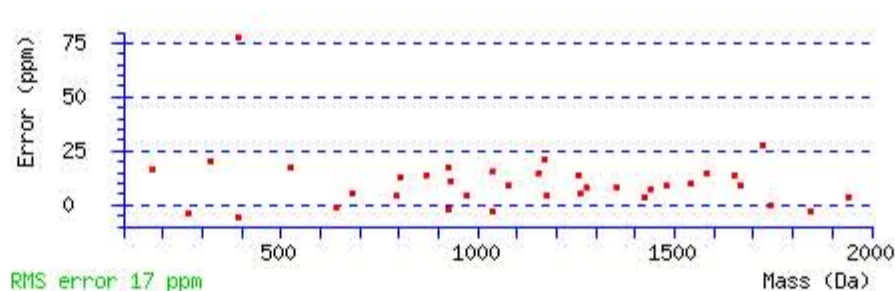

NCBI BLAST search of [HQPQEFPTYVEPTNDEICEAFR](#)

(Parameters: blastp, nr protein database, expect=20000, no filter, PAM30)

Other BLAST [web gateways](#)

All matches to this query

| Score | Mr(calc):   | Delta     | Sequence                                     |
|-------|-------------|-----------|----------------------------------------------|
| 104.1 | 3017.368774 | 0.030218  | <a href="#">HQPQEFPTYVEPTNDEICEAFR</a>       |
| 102.0 | 3017.368774 | 0.030218  | <a href="#">HQPQEFPTYVEPTNDEICEAFR</a>       |
| 1.2   | 3017.420258 | -0.021266 | <a href="#">VGWARPGCRPDVELGADDQAFVFEGR</a>   |
| 1.0   | 3017.375122 | 0.023870  | <a href="#">TGASASFNSTDPSPEPPAPSHPTSSLGR</a> |

Mascot: <http://www.matrixscience.com/>

# MASCOT Search Results

## Peptide View

MS/MS Fragmentation of **LGDDLLQCHPAVK**

Found in **PROC\_HUMAN**, Vitamin K-dependent protein C OS=Homo sapiens GN=PROC PE=1 SV=1

Match to Query 35272: 1775.905782 from(592.975870,3+) rtinseconds(1983) index(45924)

Title: Locus:1.1.1.3403.10 File:"2013-07-02 CLN FXIII 180 min 3rd F 4.wiff"

Data file C:\Program Files (x86)\Matrix Science\Mascot Daemon\mgf\9 FXIII 180 min 3rd\mascot\_daemon\_merge.mgf

Click mouse within plot area to zoom in by factor of two about that point

Or, Plot from  to  Da

Label all possible matches  Label matches used for scoring

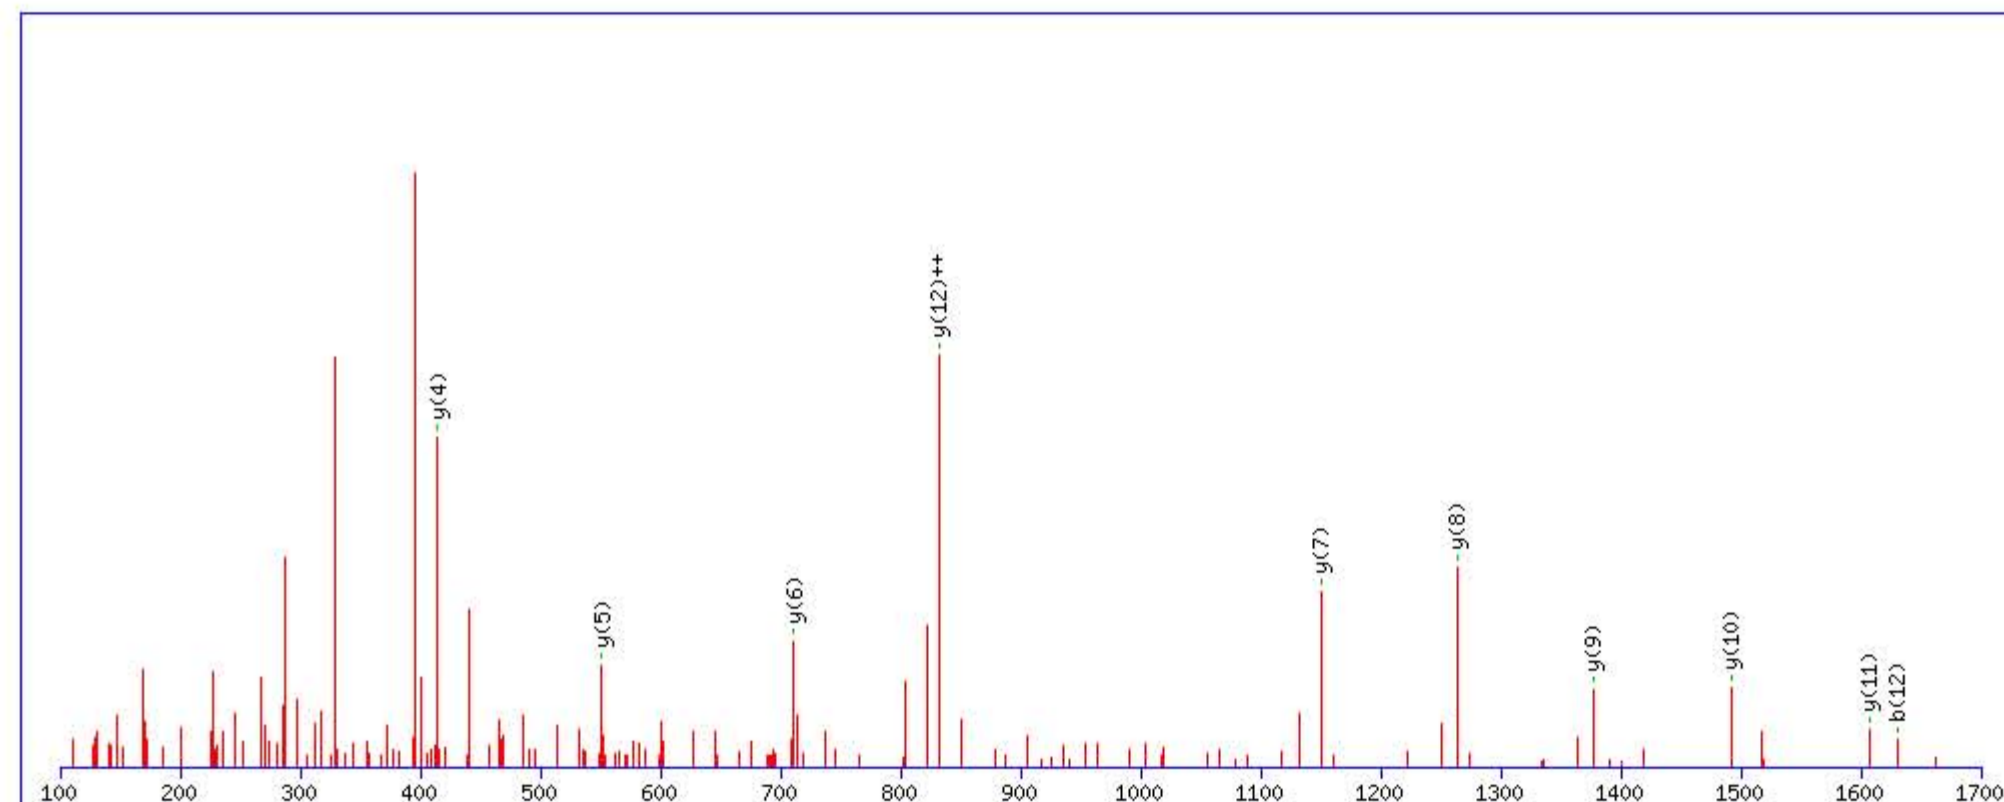

Monoisotopic mass of neutral peptide Mr(calc): 1775.906250

Fixed modifications: Carbamidomethyl (C) (apply to specified residues or termini only)

Variable modifications:

Q7 : Biotin:Thermo-21345 (Q)

Ions Score: 48 Expect: 4.3e-005

Matches : 10/110 fragment ions using 16 most intense peaks [\(help\)](#)

| #  | b           | b <sup>++</sup> | b <sup>*</sup> | b <sup>*++</sup> | b <sup>0</sup> | b <sup>0++</sup> | Seq. | y           | y <sup>++</sup> | y <sup>*</sup> | y <sup>*++</sup> | y <sup>0</sup> | y <sup>0++</sup> | #  |
|----|-------------|-----------------|----------------|------------------|----------------|------------------|------|-------------|-----------------|----------------|------------------|----------------|------------------|----|
| 1  | 114.091340  | 57.549308       |                |                  |                |                  | L    |             |                 |                |                  |                |                  | 13 |
| 2  | 171.112804  | 86.060040       |                |                  |                |                  | G    | 1663.829461 | 832.418369      | 1646.802912    | 823.905094       | 1645.818896    | 823.413086       | 12 |
| 3  | 286.139747  | 143.573512      |                |                  | 268.129182     | 134.568229       | D    | 1606.807997 | 803.907637      | 1589.781448    | 795.394362       | 1588.797432    | 794.902354       | 11 |
| 4  | 401.166690  | 201.086983      |                |                  | 383.156125     | 192.081701       | D    | 1491.781054 | 746.394165      | 1474.754505    | 737.880891       | 1473.770489    | 737.388883       | 10 |
| 5  | 514.250754  | 257.629015      |                |                  | 496.240189     | 248.623733       | L    | 1376.754111 | 688.880694      | 1359.727562    | 680.367419       |                |                  | 9  |
| 6  | 627.334818  | 314.171047      |                |                  | 609.324253     | 305.165765       | L    | 1263.670047 | 632.338662      | 1246.643498    | 623.825387       |                |                  | 8  |
| 7  | 1066.560144 | 533.783710      | 1049.533595    | 525.270436       | 1048.549579    | 524.778428       | Q    | 1150.585983 | 575.796630      | 1133.559434    | 567.283355       |                |                  | 7  |
| 8  | 1226.590793 | 613.799035      | 1209.564244    | 605.285760       | 1208.580228    | 604.793752       | C    | 711.360657  | 356.183967      | 694.334108     | 347.670692       |                |                  | 6  |
| 9  | 1363.649705 | 682.328491      | 1346.623156    | 673.815216       | 1345.639140    | 673.323208       | H    | 551.330008  | 276.168642      | 534.303459     | 267.655368       |                |                  | 5  |
| 10 | 1460.702469 | 730.854873      | 1443.675920    | 722.341598       | 1442.691904    | 721.849590       | P    | 414.271096  | 207.639186      | 397.244547     | 199.125912       |                |                  | 4  |
| 11 | 1531.739583 | 766.373430      | 1514.713034    | 757.860155       | 1513.729018    | 757.368147       | A    | 317.218332  | 159.112804      | 300.191783     | 150.599530       |                |                  | 3  |
| 12 | 1630.807997 | 815.907637      | 1613.781448    | 807.394362       | 1612.797432    | 806.902354       | V    | 246.181218  | 123.594247      | 229.154669     | 115.080973       |                |                  | 2  |
| 13 |             |                 |                |                  |                |                  | K    | 147.112804  | 74.060040       | 130.086255     | 65.546765        |                |                  | 1  |

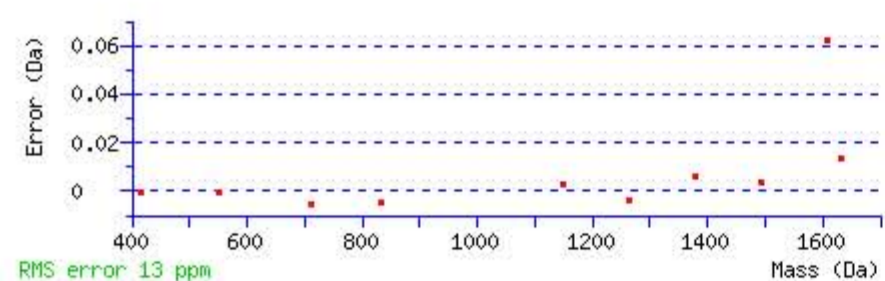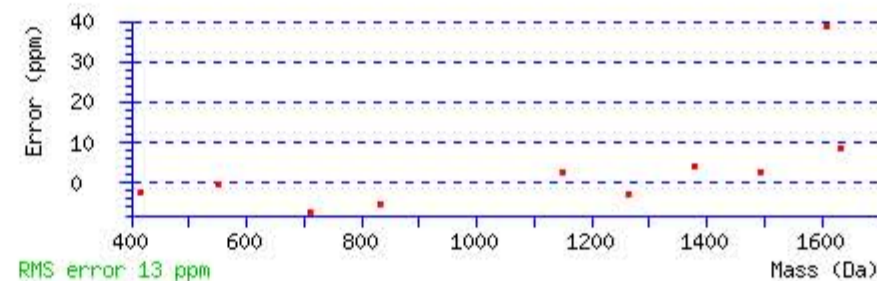

NCBI BLAST search of [LGDDLLQCHPAVK](#)

(Parameters: blastp, nr protein database, expect=20000, no filter, PAM30)

Other BLAST [web gateways](#)

All matches to this query

| Score | Mr(calc):   | Delta     | Sequence                          |
|-------|-------------|-----------|-----------------------------------|
| 47.8  | 1775.906250 | -0.000468 | <a href="#">LGDDLLQCHPAVK</a>     |
| 1.1   | 1775.879761 | 0.026021  | <a href="#">VASMDSIGNLMVSPVVK</a> |

Mascot: <http://www.matrixscience.com/>

# MASCOT Search Results

## Peptide View

MS/MS Fragmentation of **ELNQAGQETLV TGWGYHSSR**

Found in **PROC\_HUMAN**, Vitamin K-dependent protein C OS=Homo sapiens GN=PROC PE=1 SV=1

Match to Query 48989: 2543.229282 from(848.750370,3+) rtinseconds(2186) index(47175)

Title: Locus:1.1.1.3473.22 File:"2013-07-02 CLN FXIII 180 min 3rd F 4.wiff"

Data file C:\Program Files (x86)\Matrix Science\Mascot Daemon\mgf9 FXIII 180 min 3rd\mascot\_daemon\_merge.mgf

Click mouse within plot area to zoom in by factor of two about that point

Or, Plot from  to  Da

Label all possible matches  Label matches used for scoring

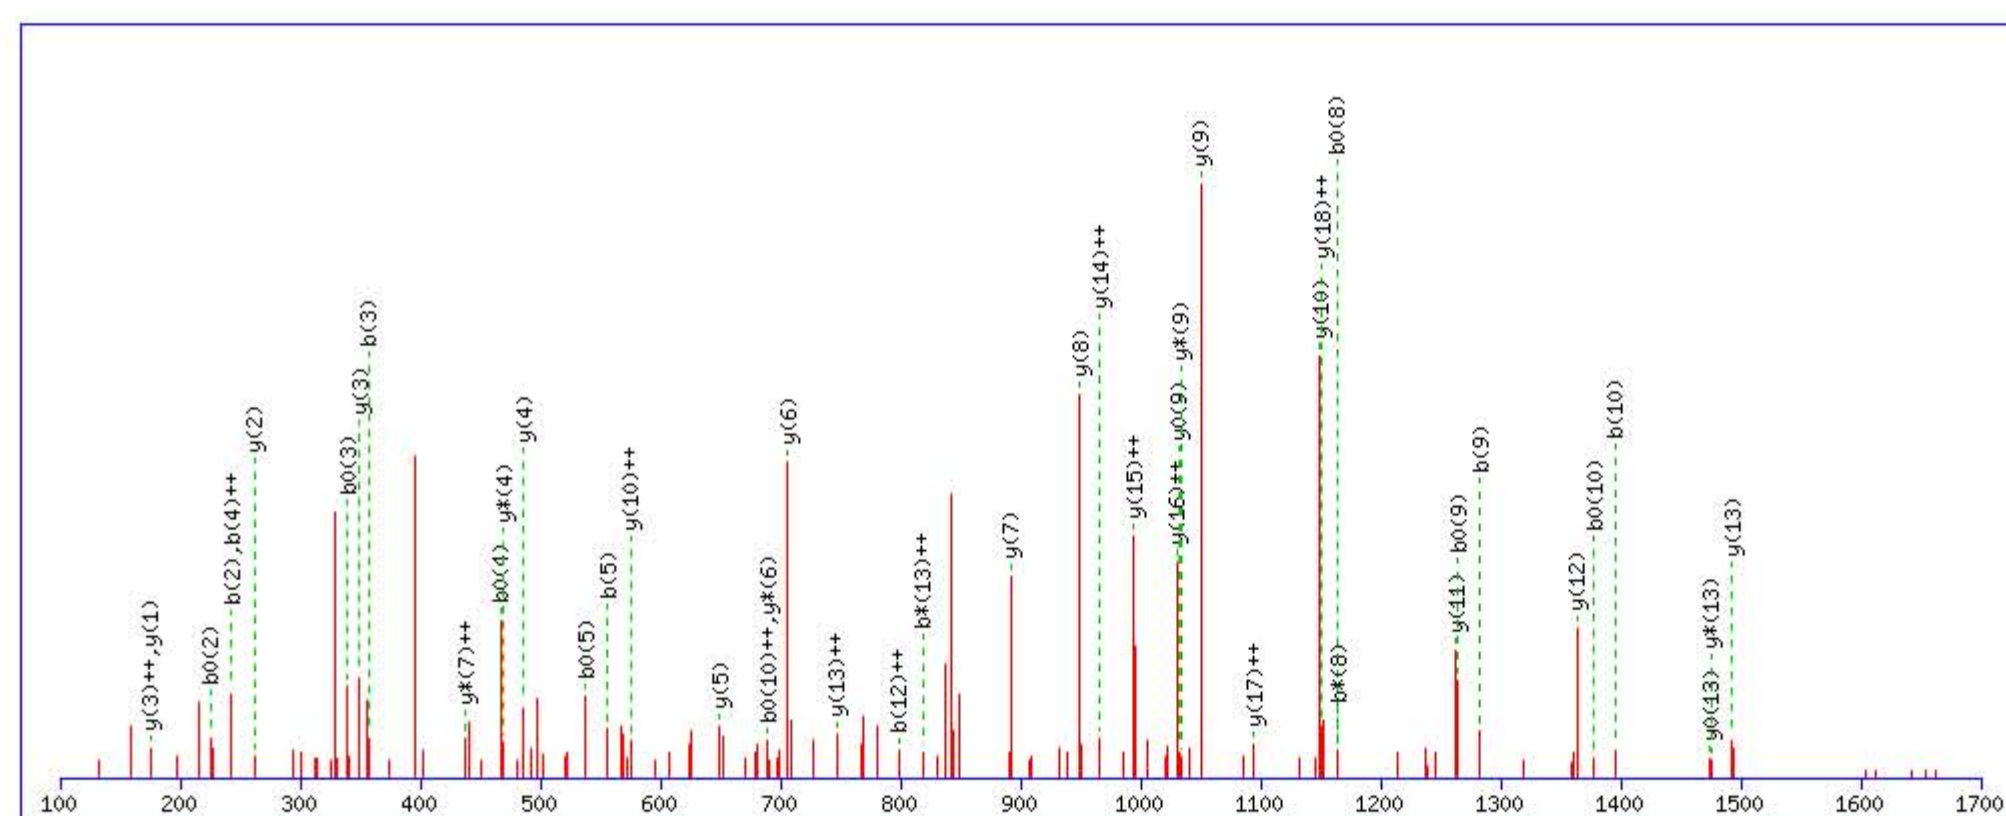

Monoisotopic mass of neutral peptide Mr(calc): 2543.222702

Fixed modifications: Carbamidomethyl (C) (apply to specified residues or termini only)

Variable modifications:

Q7 : Biotin:Thermo-21345 (Q)

Ions Score: 61 Expect: 1.9e-005

Matches : 45/222 fragment ions using 86 most intense peaks [\(help\)](#)

| #  | b                  | b <sup>++</sup>   | b <sup>*</sup>     | b <sup>*++</sup>  | b <sup>0</sup>     | b <sup>0++</sup>  | Seq. | y                  | y <sup>++</sup>    | y <sup>*</sup>     | y <sup>*++</sup>  | y <sup>0</sup>     | y <sup>0++</sup> | #  |
|----|--------------------|-------------------|--------------------|-------------------|--------------------|-------------------|------|--------------------|--------------------|--------------------|-------------------|--------------------|------------------|----|
| 1  | 130.049869         | 65.528572         |                    |                   | 112.039304         | 56.523290         | E    |                    |                    |                    |                   |                    |                  | 20 |
| 2  | <b>243.133933</b>  | 122.070605        |                    |                   | <b>225.123368</b>  | 113.065322        | L    | 2415.187392        | 1208.097334        | 2398.160843        | 1199.584059       | 2397.176827        | 1199.092051      | 19 |
| 3  | <b>357.176860</b>  | 179.092068        | 340.150311         | 170.578794        | <b>339.166295</b>  | 170.086786        | N    | 2302.103328        | <b>1151.555302</b> | 2285.076779        | 1143.042027       | 2284.092763        | 1142.550019      | 18 |
| 4  | 485.235438         | <b>243.121357</b> | 468.208889         | 234.608083        | <b>467.224873</b>  | 234.116075        | Q    | 2188.060401        | <b>1094.533838</b> | 2171.033852        | 1086.020564       | 2170.049836        | 1085.528556      | 17 |
| 5  | <b>556.272552</b>  | 278.639914        | 539.246003         | 270.126640        | <b>538.261987</b>  | 269.634632        | A    | 2060.001823        | <b>1030.504549</b> | 2042.975274        | 1021.991275       | 2041.991258        | 1021.499267      | 16 |
| 6  | 613.294016         | 307.150646        | 596.267467         | 298.637372        | 595.283451         | 298.145364        | G    | 1988.964709        | <b>994.985993</b>  | 1971.938160        | 986.472718        | 1970.954144        | 985.980710       | 15 |
| 7  | 1052.519342        | 526.763309        | 1035.492793        | 518.250035        | 1034.508777        | 517.758027        | Q    | 1931.943245        | <b>966.475261</b>  | 1914.916696        | 957.961986        | 1913.932680        | 957.469978       | 14 |
| 8  | 1181.561935        | 591.284606        | <b>1164.535386</b> | 582.771331        | <b>1163.551370</b> | 582.279323        | E    | <b>1492.717919</b> | <b>746.862597</b>  | <b>1475.691370</b> | 738.349323        | <b>1474.707354</b> | 737.857315       | 13 |
| 9  | <b>1282.609614</b> | 641.808445        | 1265.583065        | 633.295171        | <b>1264.599049</b> | 632.803163        | T    | <b>1363.675326</b> | 682.341301         | 1346.648777        | 673.828026        | 1345.664761        | 673.336018       | 12 |
| 10 | <b>1395.693678</b> | 698.350477        | 1378.667129        | 689.837203        | <b>1377.683113</b> | <b>689.345195</b> | L    | <b>1262.627647</b> | 631.817461         | 1245.601098        | 623.304187        | 1244.617082        | 622.812179       | 11 |
| 11 | 1494.762092        | 747.884684        | 1477.735543        | 739.371410        | 1476.751527        | 738.879402        | V    | <b>1149.543583</b> | <b>575.275429</b>  | 1132.517034        | 566.762155        | 1131.533018        | 566.270147       | 10 |
| 12 | 1595.809771        | <b>798.408524</b> | 1578.783222        | 789.895249        | 1577.799206        | 789.403241        | T    | <b>1050.475169</b> | 525.741222         | <b>1033.448620</b> | 517.227948        | <b>1032.464604</b> | 516.735940       | 9  |
| 13 | 1652.831235        | 826.919256        | 1635.804686        | <b>818.405981</b> | 1634.820670        | 817.913973        | G    | <b>949.427490</b>  | 475.217383         | 932.400941         | 466.704108        | 931.416925         | 466.212100       | 8  |
| 14 | 1838.910548        | 919.958912        | 1821.883999        | 911.445638        | 1820.899983        | 910.953630        | W    | <b>892.406026</b>  | 446.706651         | 875.379477         | <b>438.193376</b> | 874.395461         | 437.701368       | 7  |
| 15 | 1895.932012        | 948.469644        | 1878.905463        | 939.956370        | 1877.921447        | 939.464362        | G    | <b>706.326713</b>  | 353.666994         | <b>689.300164</b>  | 345.153720        | 688.316148         | 344.661712       | 6  |
| 16 | 2058.995341        | 1030.001308       | 2041.968792        | 1021.488034       | 2040.984776        | 1020.996026       | Y    | <b>649.305249</b>  | 325.156263         | 632.278700         | 316.642988        | 631.294684         | 316.150980       | 5  |
| 17 | 2196.054253        | 1098.530764       | 2179.027704        | 1090.017490       | 2178.043688        | 1089.525482       | H    | <b>486.241920</b>  | 243.624598         | <b>469.215371</b>  | 235.111324        | 468.231355         | 234.619316       | 4  |
| 18 | 2283.086281        | 1142.046778       | 2266.059732        | 1133.533504       | 2265.075716        | 1133.041496       | S    | <b>349.183008</b>  | <b>175.095142</b>  | 332.156459         | 166.581868        | 331.172443         | 166.089860       | 3  |
| 19 | 2370.118309        | 1185.562792       | 2353.091760        | 1177.049518       | 2352.107744        | 1176.557510       | S    | <b>262.150980</b>  | 131.579128         | 245.124431         | 123.065854        | 244.140415         | 122.573846       | 2  |
| 20 |                    |                   |                    |                   |                    |                   | R    | <b>175.118952</b>  | 88.063114          | 158.092403         | 79.549839         |                    |                  | 1  |

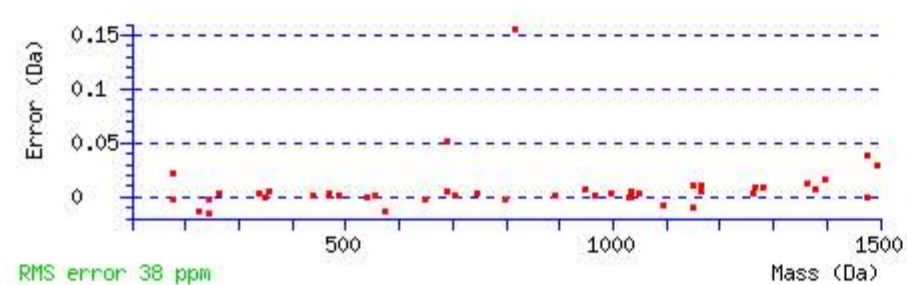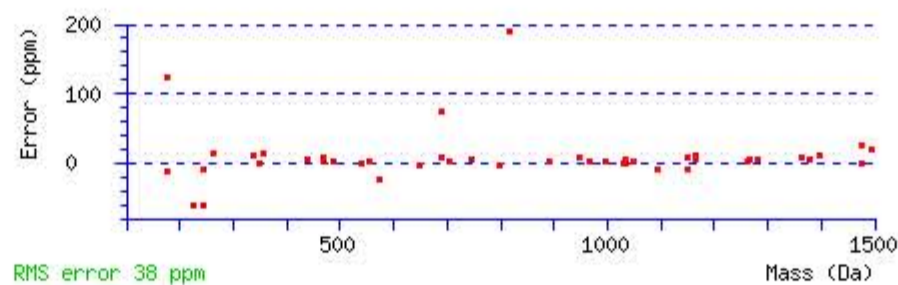

NCBI BLAST search of [ELNQAGQETLV TGWGYHSSR](#)

(Parameters: blastp, nr protein database, expect=20000, no filter, PAM30)

Other BLAST [web gateways](#)

All matches to this query

| Score | Mr(calc):   | Delta    | Sequence                              |
|-------|-------------|----------|---------------------------------------|
| 61.0  | 2543.222702 | 0.006580 | <a href="#">ELNQAGQETLV TGWGYHSSR</a> |
| 53.7  | 2543.222702 | 0.006580 | <a href="#">ELNQAGQETLV TGWGYHSSR</a> |



# Mascot Search Results

## Peptide View

MS/MS Fragmentation of **STTDNDIALHLHAQPATLSQTIVPICLPDSGLAER**  
 Found in **PROC\_HUMAN**, Vitamin K-dependent protein C OS=Homo sapiens GN=PROC PE=1 SV=1

Match to Query 62651: 4041.114056 from(1011.285790,4+) rtinseconds(2981) index(52204)  
 Title: Locus:1.1.1.3746.22 File:"2013-07-02 CLN FXIII 180 min 3rd F 4.wiff"  
 Data file C:\Program Files (x86)\Matrix Science\Mascot Daemon\mgf9 FXIII 180 min 3rd\mascot\_daemon\_merge.mgf

Click mouse within plot area to zoom in by factor of two about that point  
 Or, Plot from  to  Da   
 Label all possible matches  Label matches used for scoring

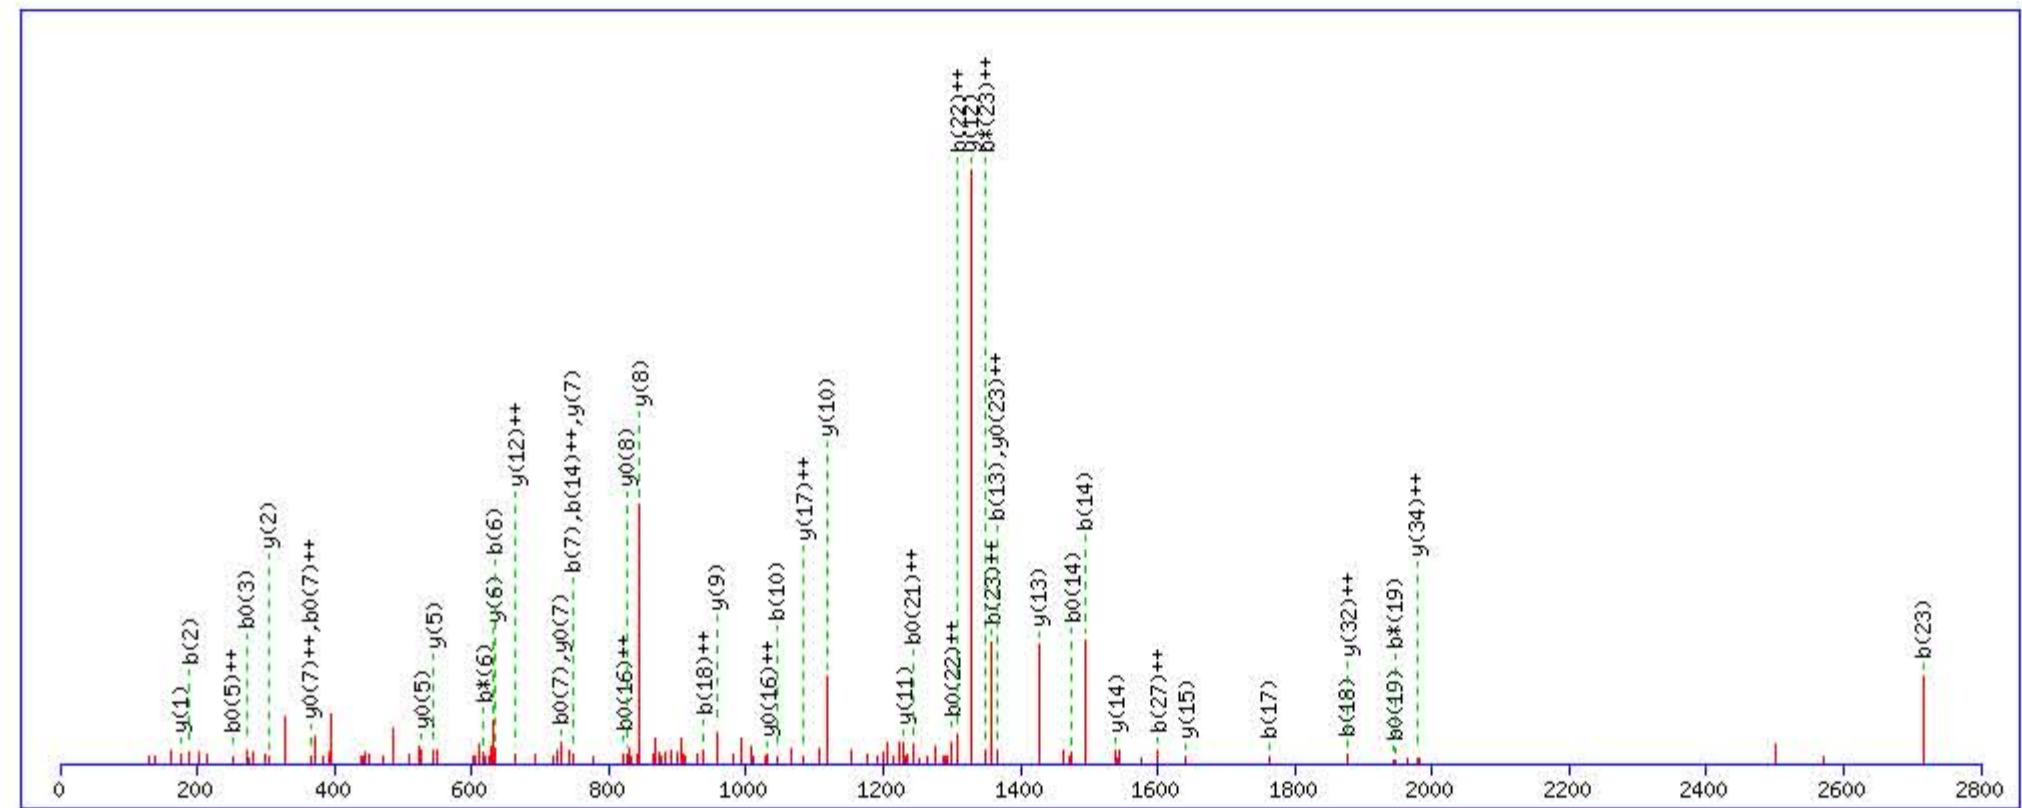

Monoisotopic mass of neutral peptide Mr(calc): 4041.091476  
 Fixed modifications: Carbamidomethyl (C) (apply to specified residues or termini only)  
 Variable modifications:  
 Q20 : Biotin:Thermo-21345 (Q)  
 Ions Score: 53 Expect: 9.6e-005  
 Matches : 49/398 fragment ions using 101 most intense peaks [\(help\)](#)

| #  | b                  | b <sup>++</sup>    | b <sup>*</sup>     | b <sup>+++</sup>   | b <sup>0</sup>     | b <sup>0++</sup>   | Seq. | y                  | y <sup>++</sup>    | y <sup>*</sup> | y <sup>+++</sup> | y <sup>0</sup>    | y <sup>0++</sup>   | #  |
|----|--------------------|--------------------|--------------------|--------------------|--------------------|--------------------|------|--------------------|--------------------|----------------|------------------|-------------------|--------------------|----|
| 1  | 88.039304          | 44.523290          |                    |                    | 70.028739          | 35.518008          | S    |                    |                    |                |                  |                   |                    | 35 |
| 2  | <b>189.086983</b>  | 95.047129          |                    |                    | 171.076418         | 86.041847          | T    | 3955.066740        | <b>1978.037008</b> | 3938.040191    | 1969.523733      | 3937.056175       | 1969.031725        | 34 |
| 3  | 290.134662         | 145.570969         |                    |                    | <b>272.124097</b>  | 136.565687         | T    | 3854.019061        | 1927.513168        | 3836.992512    | 1918.999894      | 3836.008496       | 1918.507886        | 33 |
| 4  | 405.161605         | 203.084441         |                    |                    | 387.151040         | 194.079158         | D    | 3752.971382        | <b>1876.989329</b> | 3735.944833    | 1868.476054      | 3734.960817       | 1867.984046        | 32 |
| 5  | 519.204532         | 260.105904         | 502.177983         | 251.592630         | 501.193967         | <b>251.100622</b>  | N    | 3637.944439        | 1819.475857        | 3620.917890    | 1810.962583      | 3619.933874       | 1810.470575        | 31 |
| 6  | <b>634.231475</b>  | 317.619376         | <b>617.204926</b>  | 309.106101         | 616.220910         | 308.614093         | D    | 3523.901512        | 1762.454394        | 3506.874963    | 1753.941119      | 3505.890947       | 1753.449111        | 30 |
| 7  | <b>747.315539</b>  | 374.161408         | 730.288990         | 365.648133         | <b>729.304974</b>  | <b>365.156125</b>  | I    | 3408.874569        | 1704.940922        | 3391.848020    | 1696.427648      | 3390.864004       | 1695.935640        | 29 |
| 8  | 818.352653         | 409.679965         | 801.326104         | 401.166690         | 800.342088         | 400.674682         | A    | 3295.790505        | 1648.398890        | 3278.763956    | 1639.885616      | 3277.779940       | 1639.393608        | 28 |
| 9  | 931.436717         | 466.221997         | 914.410168         | 457.708722         | 913.426152         | 457.216714         | L    | 3224.753391        | 1612.880333        | 3207.726842    | 1604.367059      | 3206.742826       | 1603.875051        | 27 |
| 10 | <b>1044.520781</b> | 522.764028         | 1027.494232        | 514.250754         | 1026.510216        | 513.758746         | L    | 3111.669327        | 1556.338301        | 3094.642778    | 1547.825027      | 3093.658762       | 1547.333019        | 26 |
| 11 | 1181.579693        | 591.293484         | 1164.553144        | 582.780210         | 1163.569128        | 582.288202         | H    | 2998.585263        | 1499.796269        | 2981.558714    | 1491.282995      | 2980.574698       | 1490.790987        | 25 |
| 12 | 1294.663757        | 647.835516         | 1277.637208        | 639.322242         | 1276.653192        | 638.830234         | L    | 2861.526351        | 1431.266813        | 2844.499802    | 1422.753539      | 2843.515786       | 1422.261531        | 24 |
| 13 | <b>1365.700871</b> | 683.354073         | 1348.674322        | 674.840799         | 1347.690306        | 674.348791         | A    | 2748.442287        | 1374.724781        | 2731.415738    | 1366.211507      | 2730.431722       | <b>1365.719499</b> | 23 |
| 14 | <b>1493.759449</b> | <b>747.383362</b>  | 1476.732900        | 738.870088         | <b>1475.748884</b> | 738.378080         | Q    | 2677.405173        | 1339.206224        | 2660.378624    | 1330.692950      | 2659.394608       | 1330.200942        | 22 |
| 15 | 1590.812213        | 795.909744         | 1573.785664        | 787.396470         | 1572.801648        | 786.904462         | P    | 2549.346595        | 1275.176935        | 2532.320046    | 1266.663661      | 2531.336030       | 1266.171653        | 21 |
| 16 | 1661.849327        | 831.428301         | 1644.822778        | 822.915027         | 1643.838762        | <b>822.423019</b>  | A    | 2452.293831        | 1226.650553        | 2435.267282    | 1218.137279      | 2434.283266       | 1217.645271        | 20 |
| 17 | <b>1762.897006</b> | 881.952141         | 1745.870457        | 873.438867         | 1744.886441        | 872.946858         | T    | 2381.256717        | 1191.131996        | 2364.230168    | 1182.618722      | 2363.246152       | 1182.126714        | 19 |
| 18 | <b>1875.981070</b> | <b>938.494173</b>  | 1858.954521        | 929.980898         | 1857.970505        | 929.488890         | L    | 2280.209038        | 1140.608157        | 2263.182489    | 1132.094882      | 2262.198473       | 1131.602874        | 18 |
| 19 | 1963.013098        | 982.010187         | <b>1945.986549</b> | 973.496913         | <b>1945.002533</b> | 973.004904         | S    | 2167.124974        | <b>1084.066125</b> | 2150.098425    | 1075.552850      | 2149.114409       | 1075.060842        | 17 |
| 20 | 2402.238424        | 1201.622850        | 2385.211875        | 1193.109575        | 2384.227859        | 1192.617567        | Q    | 2080.092946        | 1040.550111        | 2063.066397    | 1032.036836      | 2062.082381       | <b>1031.544828</b> | 16 |
| 21 | 2503.286103        | 1252.146689        | 2486.259554        | 1243.633415        | 2485.275538        | <b>1243.141407</b> | T    | <b>1640.867620</b> | 820.937448         | 1623.841071    | 812.424174       | 1622.857055       | 811.932166         | 15 |
| 22 | 2616.370167        | <b>1308.688721</b> | 2599.343618        | 1300.175447        | 2598.359602        | <b>1299.683439</b> | I    | <b>1539.819941</b> | 770.413609         | 1522.793392    | 761.900334       | 1521.809376       | 761.408326         | 14 |
| 23 | <b>2715.438581</b> | <b>1358.222928</b> | 2698.412032        | <b>1349.709654</b> | 2697.428016        | 1349.217646        | V    | <b>1426.735877</b> | 713.871577         | 1409.709328    | 705.358302       | 1408.725312       | 704.866294         | 13 |
| 24 | 2812.491345        | 1406.749310        | 2795.464796        | 1398.236036        | 2794.480780        | 1397.744028        | P    | <b>1327.667463</b> | <b>664.337370</b>  | 1310.640914    | 655.824095       | 1309.656898       | 655.332087         | 12 |
| 25 | 2925.575409        | 1463.291342        | 2908.548860        | 1454.778068        | 2907.564844        | 1454.286060        | I    | <b>1230.614699</b> | 615.810988         | 1213.588150    | 607.297713       | 1212.604134       | 606.805705         | 11 |
| 26 | 3085.606058        | 1543.306667        | 3068.579509        | 1534.793392        | 3067.595493        | 1534.301384        | C    | <b>1117.530635</b> | 559.268956         | 1100.504086    | 550.755681       | 1099.520070       | 550.263673         | 10 |
| 27 | 3198.690122        | <b>1599.848699</b> | 3181.663573        | 1591.335424        | 3180.679557        | 1590.843416        | L    | <b>957.499986</b>  | 479.253631         | 940.473437     | 470.740357       | 939.489421        | 470.248349         | 9  |
| 28 | 3295.742886        | 1648.375081        | 3278.716337        | 1639.861806        | 3277.732321        | 1639.369798        | P    | <b>844.415922</b>  | 422.711599         | 827.389373     | 414.198325       | <b>826.405357</b> | 413.706317         | 8  |
| 29 | 3410.769829        | 1705.888552        | 3393.743280        | 1697.375278        | 3392.759264        | 1696.883270        | D    | <b>747.363158</b>  | 374.185217         | 730.336609     | 365.671943       | <b>729.352593</b> | <b>365.179935</b>  | 7  |
| 30 | 3497.801857        | 1749.404566        | 3480.775308        | 1740.891292        | 3479.791292        | 1740.399284        | S    | <b>632.336215</b>  | 316.671746         | 615.309666     | 308.158471       | 614.325650        | 307.666463         | 6  |
| 31 | 3554.823321        | 1777.915298        | 3537.796772        | 1769.402024        | 3536.812756        | 1768.910016        | G    | <b>545.304187</b>  | 273.155732         | 528.277638     | 264.642457       | <b>527.293622</b> | 264.150449         | 5  |
| 32 | 3667.907385        | 1834.457330        | 3650.880836        | 1825.944056        | 3649.896820        | 1825.452048        | L    | 488.282723         | 244.645000         | 471.256174     | 236.131725       | 470.272158        | 235.639717         | 4  |
| 33 | 3738.944499        | 1869.975887        | 3721.917950        | 1861.462613        | 3720.933934        | 1860.970605        | A    | 375.198659         | 188.102968         | 358.172110     | 179.589693       | 357.188094        | 179.097685         | 3  |
| 34 | 3867.987092        | 1934.497184        | 3850.960543        | 1925.983909        | 3849.976527        | 1925.491901        | E    | <b>304.161545</b>  | 152.584411         | 287.134996     | 144.071136       | 286.150980        | 143.579128         | 2  |
| 35 |                    |                    |                    |                    |                    |                    | R    | <b>175.118952</b>  | 88.063114          | 158.092403     | 79.549839        |                   |                    | 1  |

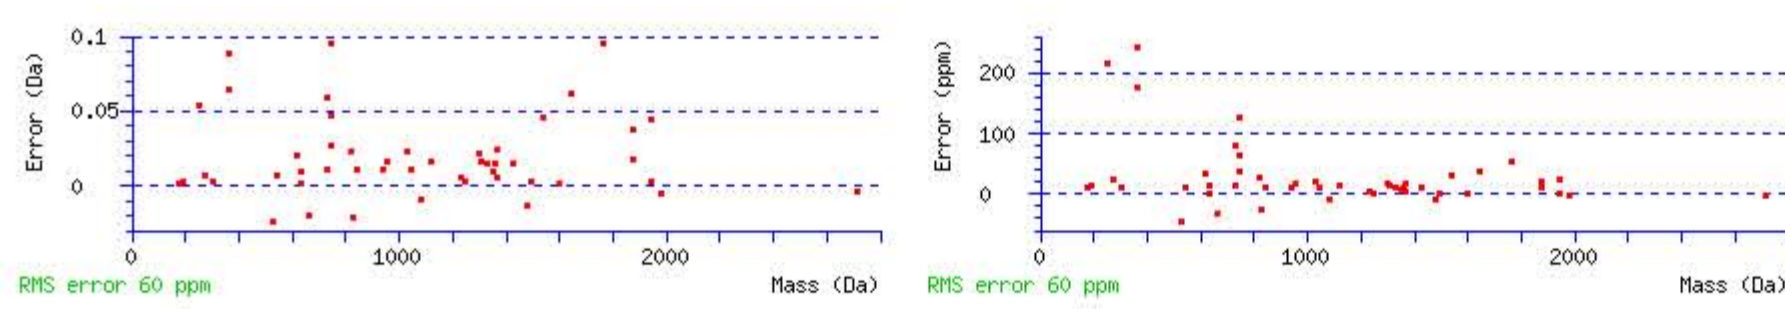

NCBI BLAST search of **STTDNDIALHLHAQPATLSQTIVPICLPDSGLAER**  
 (Parameters: blastp, nr protein database, expect=20000, no filter, PAM30)  
 Other BLAST [web gateways](#)

### All matches to this query

| Score | Mr(calc):   | Delta    | Sequence                                            |
|-------|-------------|----------|-----------------------------------------------------|
| 52.6  | 4041.091476 | 0.022580 | <a href="#">STTDNDIALHLHAQPATLSQTIVPICLPDSGLAER</a> |
| 31.5  | 4041.091476 | 0.022580 | <a href="#">STTDNDIALHLHAQPATLSQTIVPICLPDSGLAER</a> |

# **MASCOT** Mascot Search Results

## Peptide View

MS/MS Fragmentation of **QLAVLDK**

Found in **PROS\_HUMAN**, Vitamin K-dependent protein S OS=Homo sapiens GN=PROS1 PE=1 SV=1

Match to Query 13790: 1096.631228 from(549.322890,2+) rtinseconds(1985) index(45943)

Title: Locus:1.1.1.3404.4 File:"2013-07-02 CLN FXIII 180 min 3rd F 4.wiff"

Data file C:\Program Files (x86)\Matrix Science\Mascot Daemon\mgf9 FXIII 180 min 3rd\mascot\_daemon\_merge.mgf

Click mouse within plot area to zoom in by factor of two about that point

Or, Plot from  to  Da

Label all possible matches  Label matches used for scoring

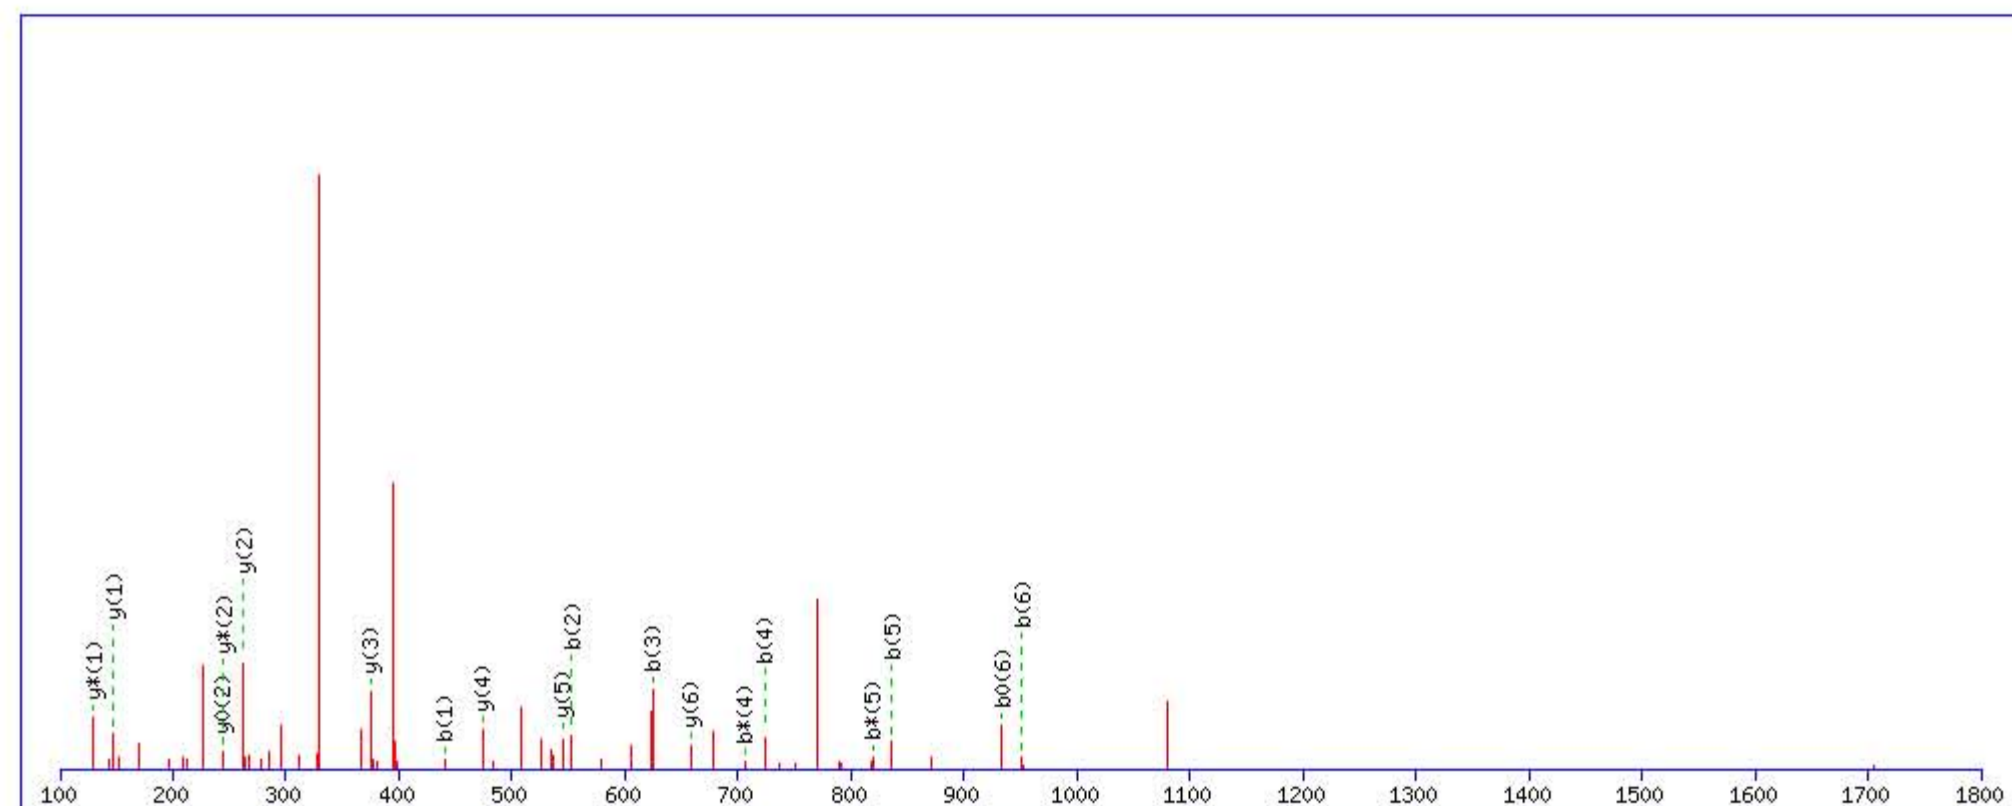

Monoisotopic mass of neutral peptide Mr(calc): 1096.631439

Fixed modifications: Carbamidomethyl (C) (apply to specified residues or termini only)

Variable modifications:

Q1 : Biotin:Thermo-21345 (Q)

Ions Score: 26 Expect: 0.036

Matches : 18/60 fragment ions using 41 most intense peaks [\(help\)](#)

| # | b                 | b <sup>++</sup> | b <sup>*</sup>    | b <sup>*++</sup> | b <sup>0</sup>    | b <sup>0++</sup> | Seq.     | y                 | y <sup>++</sup> | y <sup>*</sup>    | y <sup>*++</sup> | y <sup>0</sup>    | y <sup>0++</sup> | # |
|---|-------------------|-----------------|-------------------|------------------|-------------------|------------------|----------|-------------------|-----------------|-------------------|------------------|-------------------|------------------|---|
| 1 | <b>440.232602</b> | 220.619939      | 423.206053        | 212.106664       |                   |                  | <b>Q</b> |                   |                 |                   |                  |                   |                  | 7 |
| 2 | <b>553.316666</b> | 277.161971      | 536.290117        | 268.648697       |                   |                  | <b>L</b> | <b>658.413403</b> | 329.710340      | 641.386854        | 321.197065       | 640.402838        | 320.705057       | 6 |
| 3 | <b>624.353780</b> | 312.680528      | 607.327231        | 304.167254       |                   |                  | <b>A</b> | <b>545.329339</b> | 273.168308      | 528.302790        | 264.655033       | 527.318774        | 264.163025       | 5 |
| 4 | <b>723.422194</b> | 362.214735      | <b>706.395645</b> | 353.701461       |                   |                  | <b>V</b> | <b>474.292225</b> | 237.649750      | 457.265676        | 229.136476       | 456.281660        | 228.644468       | 4 |
| 5 | <b>836.506258</b> | 418.756767      | <b>819.479709</b> | 410.243493       |                   |                  | <b>L</b> | <b>375.223811</b> | 188.115543      | 358.197262        | 179.602269       | 357.213246        | 179.110261       | 3 |
| 6 | <b>951.533201</b> | 476.270239      | 934.506652        | 467.756964       | <b>933.522636</b> | 467.264956       | <b>D</b> | <b>262.139747</b> | 131.573511      | <b>245.113198</b> | 123.060237       | <b>244.129182</b> | 122.568229       | 2 |
| 7 |                   |                 |                   |                  |                   |                  | <b>K</b> | <b>147.112804</b> | 74.060040       | <b>130.086255</b> | 65.546765        |                   |                  | 1 |

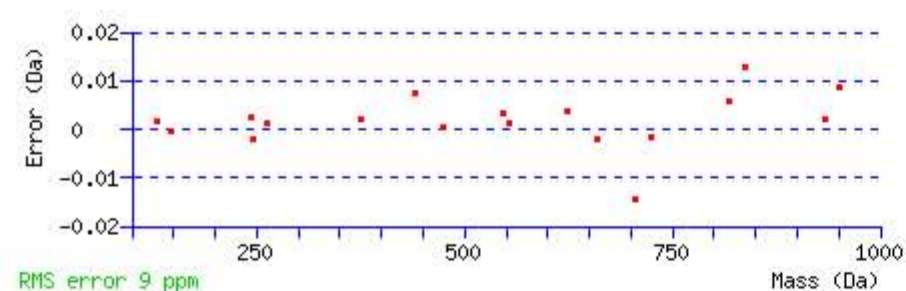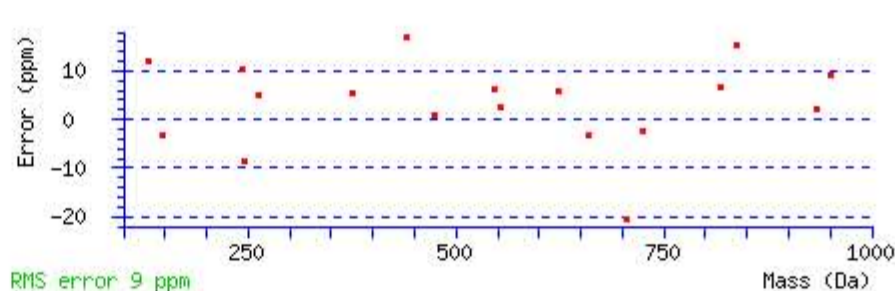

NCBI BLAST search of **QLAVLDK**

(Parameters: blastp, nr protein database, expect=20000, no filter, PAM30)

Other BLAST [web gateways](#)

All matches to this query

| Score | Mr(calc):   | Delta     | Sequence                   |
|-------|-------------|-----------|----------------------------|
| 26.4  | 1096.631439 | -0.000211 | <a href="#">QLAVLDK</a>    |
| 15.5  | 1096.624054 | 0.007174  | <a href="#">KPVDSVPLSR</a> |
| 9.0   | 1096.624023 | 0.007205  | <a href="#">IPRENLLDK</a>  |
| 6.7   | 1096.631439 | -0.000211 | <a href="#">GILQLDK</a>    |
| 4.4   | 1096.639297 | -0.008069 | <a href="#">AHVSPLFKAK</a> |
| 3.8   | 1096.635269 | -0.004041 | <a href="#">SSSLVIHKAR</a> |
| 1.8   | 1096.631439 | -0.000211 | <a href="#">ILGLDQK</a>    |

Mascot: <http://www.matrixscience.com/>

# MASCOT Search Results

## Peptide View

MS/MS Fragmentation of **QSTNAYPDLR**

Found in **PROS\_HUMAN**, Vitamin K-dependent protein S OS=Homo sapiens GN=PROS1 PE=1 SV=1

Match to Query 26499: 1474.720948 from(738.367750,2+) rtinseconds(1789) index(30533)

Title: Locus:1.1.1.3286.20 File:"2013-07-02 CLN FXIII 180 min 3rd F 3.wiff"

Data file C:\Program Files (x86)\Matrix Science\Mascot Daemon\mgf9 FXIII 180 min 3rd\mascot\_daemon\_merge.mgf

Click mouse within plot area to zoom in by factor of two about that point

Or, Plot from  to  Da

Label all possible matches  Label matches used for scoring

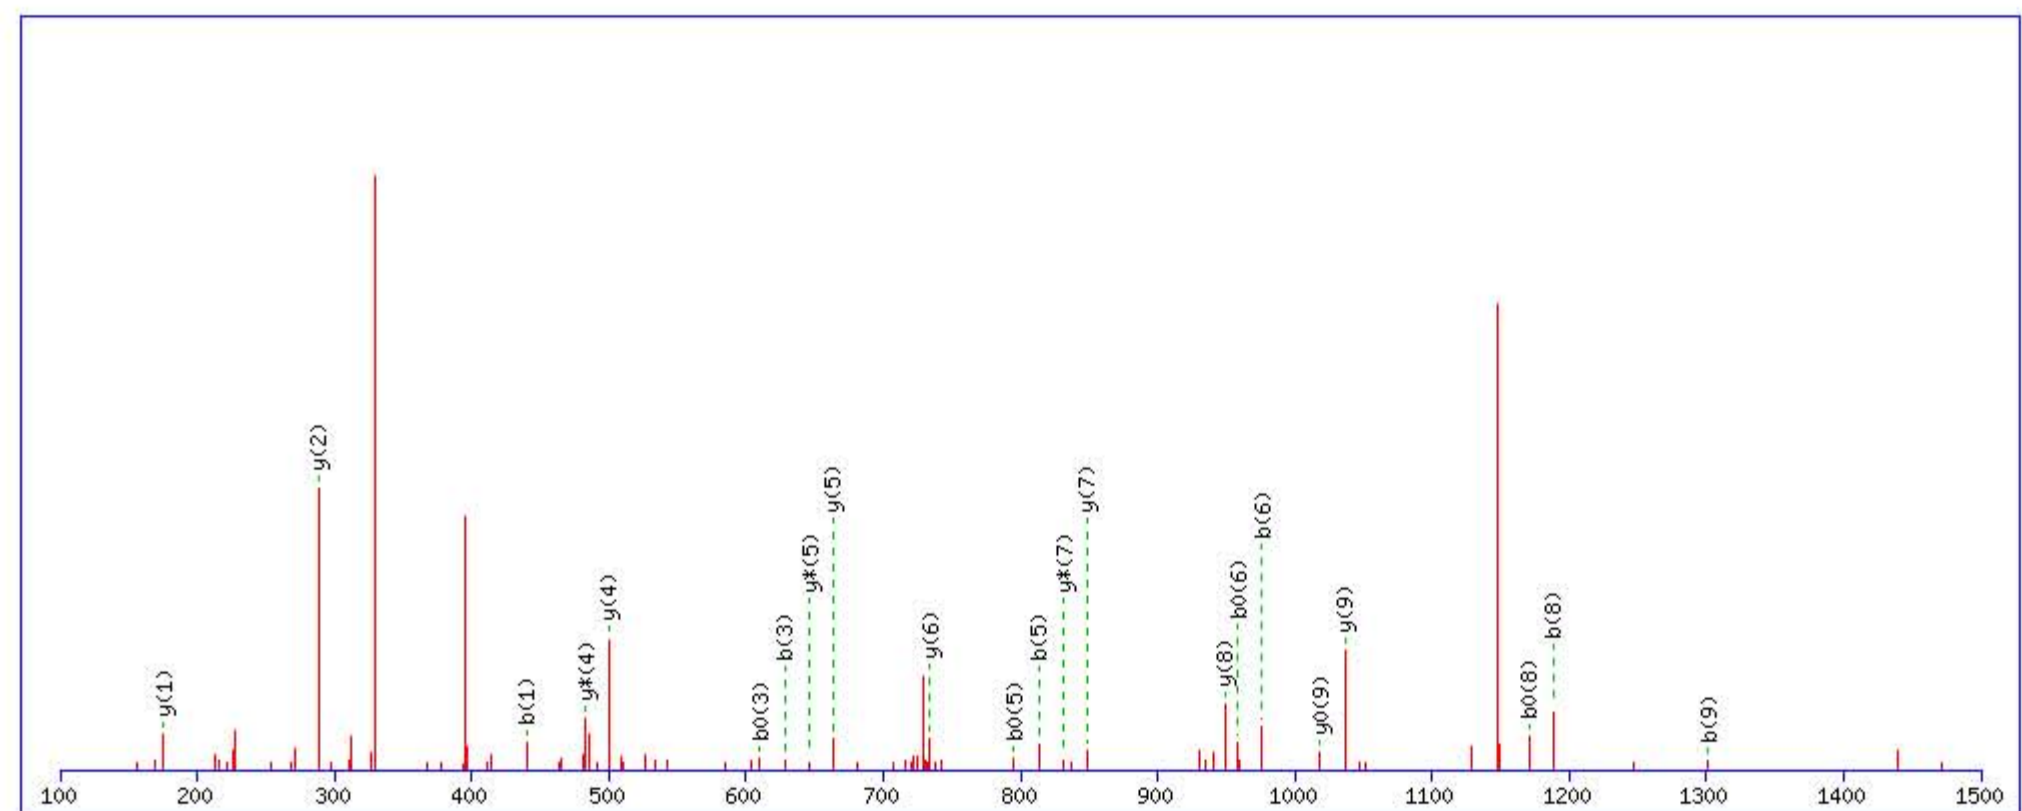

Monoisotopic mass of neutral peptide Mr(calc): 1474.723831

Fixed modifications: Carbamidomethyl (C) (apply to specified residues or termini only)

Variable modifications:

Q1 : Biotin:Thermo-21345 (Q)

Ions Score: 43 Expect: 0.00093

Matches : 22/102 fragment ions using 45 most intense peaks [\(help\)](#)

| #  | b                  | b <sup>++</sup> | b <sup>+</sup> | b <sup>+++</sup> | b <sup>0</sup>     | b <sup>0++</sup> | Seq. | y                  | y <sup>++</sup> | y <sup>+</sup>    | y <sup>+++</sup> | y <sup>0</sup>     | y <sup>0++</sup> | #  |
|----|--------------------|-----------------|----------------|------------------|--------------------|------------------|------|--------------------|-----------------|-------------------|------------------|--------------------|------------------|----|
| 1  | <b>440.232602</b>  | 220.619939      | 423.206053     | 212.106664       |                    |                  | Q    |                    |                 |                   |                  |                    |                  | 10 |
| 2  | 527.264630         | 264.135953      | 510.238081     | 255.622679       | 509.254065         | 255.130671       | S    | <b>1036.505800</b> | 518.756538      | 1019.479251       | 510.243263       | <b>1018.495235</b> | 509.751255       | 9  |
| 3  | <b>628.312309</b>  | 314.659793      | 611.285760     | 306.146518       | <b>610.301744</b>  | 305.654510       | T    | <b>949.473772</b>  | 475.240524      | 932.447223        | 466.727249       | 931.463207         | 466.235241       | 8  |
| 4  | 742.355236         | 371.681256      | 725.328687     | 363.167982       | 724.344671         | 362.675974       | N    | <b>848.426093</b>  | 424.716684      | <b>831.399544</b> | 416.203410       | 830.415528         | 415.711402       | 7  |
| 5  | <b>813.392350</b>  | 407.199813      | 796.365801     | 398.686538       | <b>795.381785</b>  | 398.194530       | A    | <b>734.383166</b>  | 367.695221      | 717.356617        | 359.181946       | 716.372601         | 358.689938       | 6  |
| 6  | <b>976.455679</b>  | 488.731477      | 959.429130     | 480.218203       | <b>958.445114</b>  | 479.726195       | Y    | <b>663.346052</b>  | 332.176664      | <b>646.319503</b> | 323.663389       | 645.335487         | 323.171382       | 5  |
| 7  | 1073.508443        | 537.257860      | 1056.481894    | 528.744585       | 1055.497878        | 528.252577       | P    | <b>500.282723</b>  | 250.644999      | <b>483.256174</b> | 242.131725       | 482.272158         | 241.639717       | 4  |
| 8  | <b>1188.535386</b> | 594.771331      | 1171.508837    | 586.258057       | <b>1170.524821</b> | 585.766049       | D    | 403.229959         | 202.118617      | 386.203410        | 193.605343       | 385.219394         | 193.113335       | 3  |
| 9  | <b>1301.619450</b> | 651.313363      | 1284.592901    | 642.800089       | 1283.608885        | 642.308080       | L    | <b>288.203016</b>  | 144.605146      | 271.176467        | 136.091871       |                    |                  | 2  |
| 10 |                    |                 |                |                  |                    |                  | R    | <b>175.118952</b>  | 88.063114       | 158.092403        | 79.549839        |                    |                  | 1  |

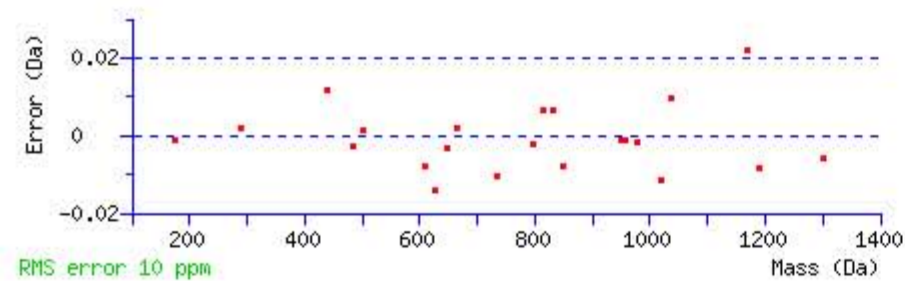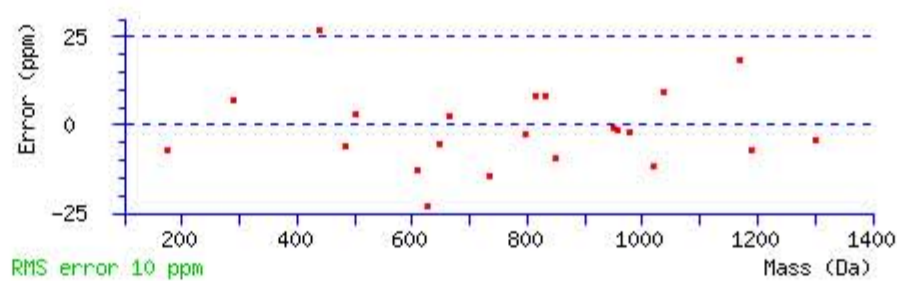

NCBI BLAST search of [QSTNAYPDLR](#)

(Parameters: blastp, nr protein database, expect=20000, no filter, PAM30)

Other BLAST [web gateways](#)

## All matches to this query

| Score | Mr(calc):   | Delta     | Sequence                        |
|-------|-------------|-----------|---------------------------------|
| 43.3  | 1474.723831 | -0.002883 | <a href="#">QSTNAYPDLR</a>      |
| 14.9  | 1474.741592 | -0.020644 | <a href="#">SSLEHGSDVYLLR</a>   |
| 12.8  | 1474.721161 | -0.000213 | <a href="#">QSTHGERGHR</a>      |
| 7.2   | 1474.735092 | -0.014144 | <a href="#">SFCVLSQLTQHR</a>    |
| 6.1   | 1474.719803 | 0.001145  | <a href="#">CVASNAAGADSLAIR</a> |
| 5.1   | 1474.742462 | -0.021514 | <a href="#">QCKSEFPIR</a>       |
| 3.8   | 1474.738419 | -0.017471 | <a href="#">NNMEGLNVMGKLR</a>   |
| 3.5   | 1474.719788 | 0.001160  | <a href="#">QQEELQMLR</a>       |
| 3.3   | 1474.716461 | 0.004487  | <a href="#">AFSDSSQLTVHQR</a>   |
| 3.2   | 1474.723846 | -0.002898 | <a href="#">QQDGELVGYR</a>      |

# MASCOT Search Results

## Peptide View

MS/MS Fragmentation of **SFQTGLFTAAR**

Found in **PROS\_HUMAN**, Vitamin K-dependent protein S OS=Homo sapiens GN=PROS1 PE=1 SV=1

Match to Query 27494: 1508.776428 from(755.395490,2+) rtinseconds(2323) index(47953)

Title: Locus:1.1.1.3521.10 File:"2013-07-02 CLN FXIII 180 min 3rd F 4.wiff"

Data file C:\Program Files (x86)\Matrix Science\Mascot Daemon\mgf9 FXIII 180 min 3rd\mascot\_daemon\_merge.mgf

Click mouse within plot area to zoom in by factor of two about that point

Or, Plot from 0 to 2800 Da Full range

Label all possible matches  Label matches used for scoring

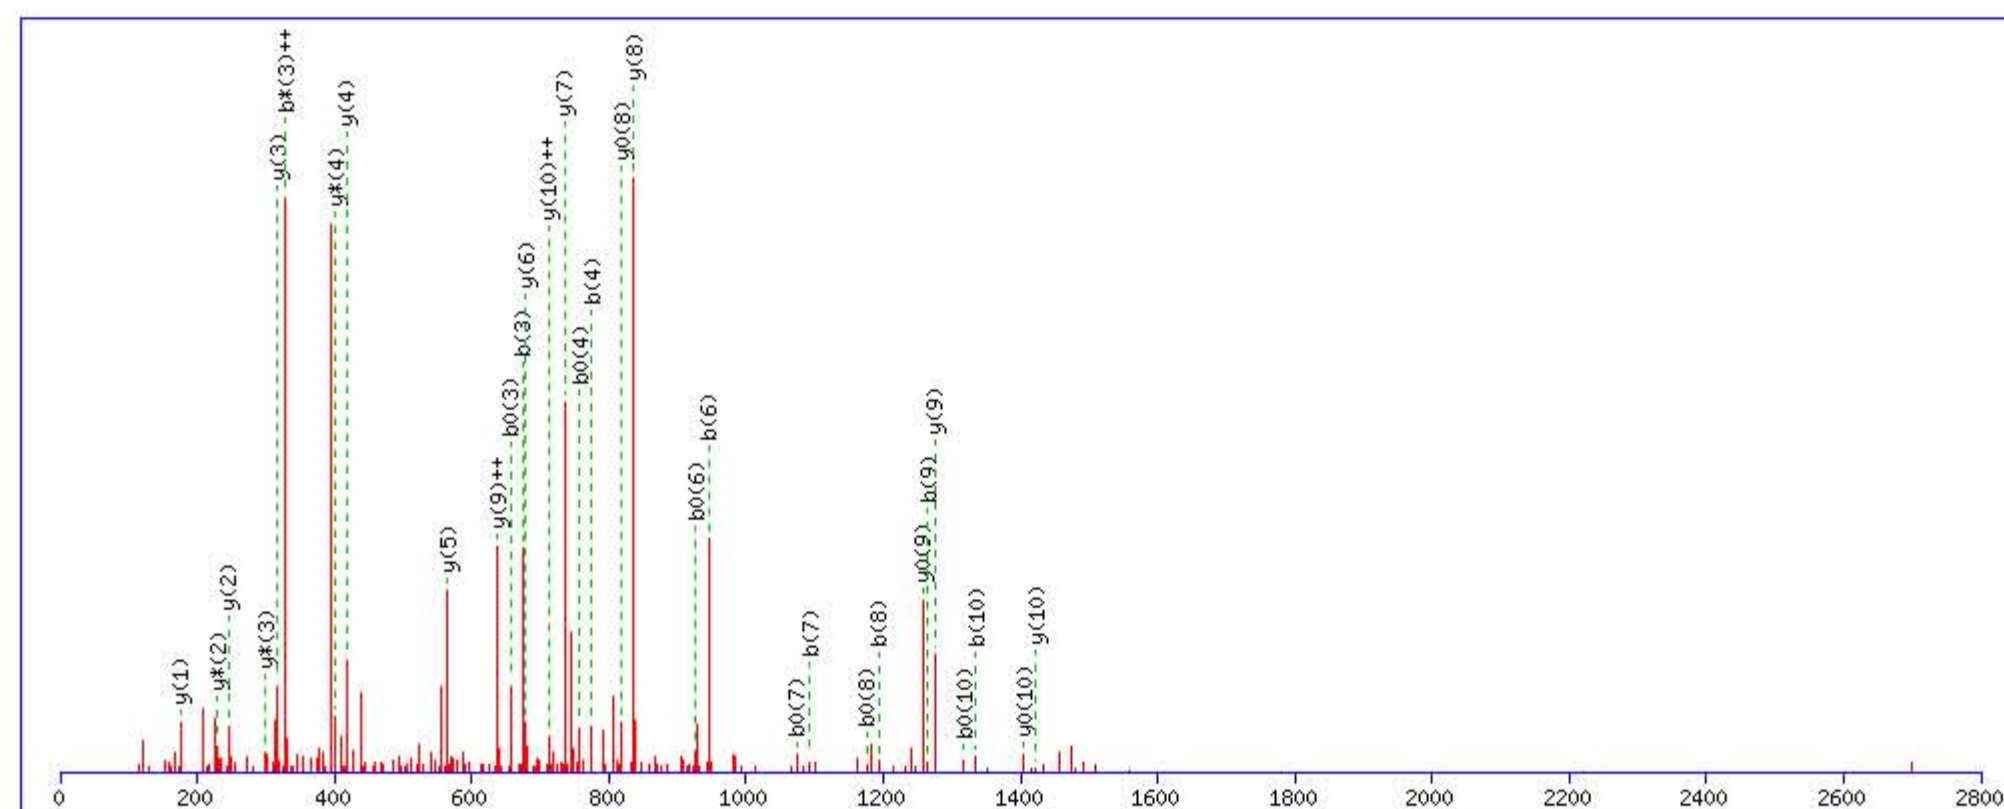

Monoisotopic mass of neutral peptide Mr(calc): 1508.780975

Fixed modifications: Carbamidomethyl (C) (apply to specified residues or termini only)

Variable modifications:

Q3 : Biotin:Thermo-21345 (Q)

Ions Score: 55 Expect: 2.2e-005

Matches : 32/110 fragment ions using 70 most intense peaks [\(help\)](#)

| #  | b           | b <sup>++</sup> | b <sup>*</sup> | b <sup>*++</sup> | b <sup>0</sup> | b <sup>0++</sup> | Seq. | y           | y <sup>++</sup> | y <sup>*</sup> | y <sup>*++</sup> | y <sup>0</sup> | y <sup>0++</sup> | #  |
|----|-------------|-----------------|----------------|------------------|----------------|------------------|------|-------------|-----------------|----------------|------------------|----------------|------------------|----|
| 1  | 88.039304   | 44.523290       |                |                  | 70.028739      | 35.518008        | S    |             |                 |                |                  |                |                  | 11 |
| 2  | 235.107718  | 118.057497      |                |                  | 217.097153     | 109.052214       | F    | 1422.756220 | 711.881748      | 1405.729671    | 703.368474       | 1404.745655    | 702.876465       | 10 |
| 3  | 674.333044  | 337.670160      | 657.306495     | 329.156885       | 656.322479     | 328.664877       | Q    | 1275.687806 | 638.347541      | 1258.661257    | 629.834267       | 1257.677241    | 629.342259       | 9  |
| 4  | 775.380723  | 388.194000      | 758.354174     | 379.680725       | 757.370158     | 379.188717       | T    | 836.462480  | 418.734878      | 819.435931     | 410.221604       | 818.451915     | 409.729596       | 8  |
| 5  | 832.402187  | 416.704732      | 815.375638     | 408.191457       | 814.391622     | 407.699449       | G    | 735.414801  | 368.211039      | 718.388252     | 359.697764       | 717.404236     | 359.205756       | 7  |
| 6  | 945.486251  | 473.246764      | 928.459702     | 464.733489       | 927.475686     | 464.241481       | L    | 678.393337  | 339.700307      | 661.366788     | 331.187032       | 660.382772     | 330.695024       | 6  |
| 7  | 1092.554665 | 546.780971      | 1075.528116    | 538.267696       | 1074.544100    | 537.775688       | F    | 565.309273  | 283.158275      | 548.282724     | 274.645000       | 547.298708     | 274.152992       | 5  |
| 8  | 1193.602344 | 597.304810      | 1176.575795    | 588.791536       | 1175.591779    | 588.299528       | T    | 418.240859  | 209.624067      | 401.214310     | 201.110793       | 400.230294     | 200.618785       | 4  |
| 9  | 1264.639458 | 632.823367      | 1247.612909    | 624.310093       | 1246.628893    | 623.818085       | A    | 317.193180  | 159.100228      | 300.166631     | 150.586953       |                |                  | 3  |
| 10 | 1335.676572 | 668.341924      | 1318.650023    | 659.828650       | 1317.666007    | 659.336642       | A    | 246.156066  | 123.581671      | 229.129517     | 115.068396       |                |                  | 2  |
| 11 |             |                 |                |                  |                |                  | R    | 175.118952  | 88.063114       | 158.092403     | 79.549839        |                |                  | 1  |

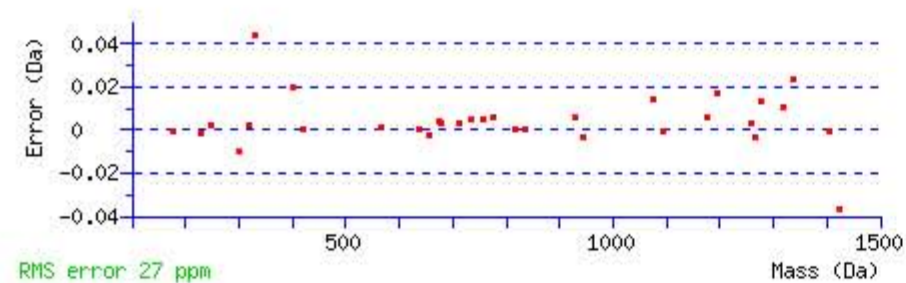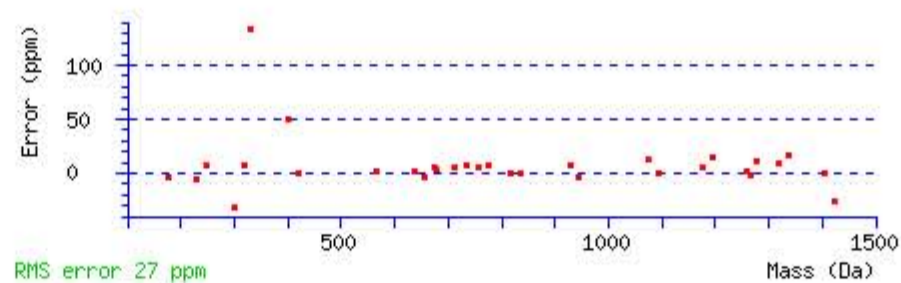

NCBI BLAST search of **SFQTGLFTAAR**

(Parameters: blastp, nr protein database, expect=20000, no filter, PAM30)

Other BLAST [web gateways](#)

All matches to this query

| Score | Mr(calc):   | Delta     | Sequence                       |
|-------|-------------|-----------|--------------------------------|
| 55.0  | 1508.780975 | -0.004547 | <a href="#">SFQTGLFTAAR</a>    |
| 5.0   | 1508.762344 | 0.014084  | <a href="#">EDFVPFTGEKKGR</a>  |
| 3.9   | 1508.798721 | -0.022293 | <a href="#">SSYGVAAPVDFLRK</a> |
| 3.5   | 1508.776932 | -0.000504 | <a href="#">LMGADSLQLFRSR</a>  |
| 0.3   | 1508.759186 | 0.017242  | <a href="#">QVHCGSEILR</a>     |
| 0.1   | 1508.765701 | 0.010727  | <a href="#">TKPLSMLYVDNGR</a>  |

Mascot: <http://www.matrixscience.com/>

# MASCOT SEARCH RESULTS

## Peptide View

MS/MS Fragmentation of **IETISHEDLQR**

Found in **PROS\_HUMAN**, Vitamin K-dependent protein S OS=Homo sapiens GN=PROS1 PE=1 SV=1

Match to Query 32719: 1650.833022 from(551.284950,3+) rtinseconds(1648) index(29771)

Title: Locus:1.1.1.3237.14 File:"2013-07-02 CLN FXIII 180 min 3rd F 3.wiff"

Data file C:\Program Files (x86)\Matrix Science\Mascot Daemon\mgf\9 FXIII 180 min 3rd\mascot\_daemon\_merge.mgf

Click mouse within plot area to zoom in by factor of two about that point

Or, Plot from  to  Da

Label all possible matches  Label matches used for scoring

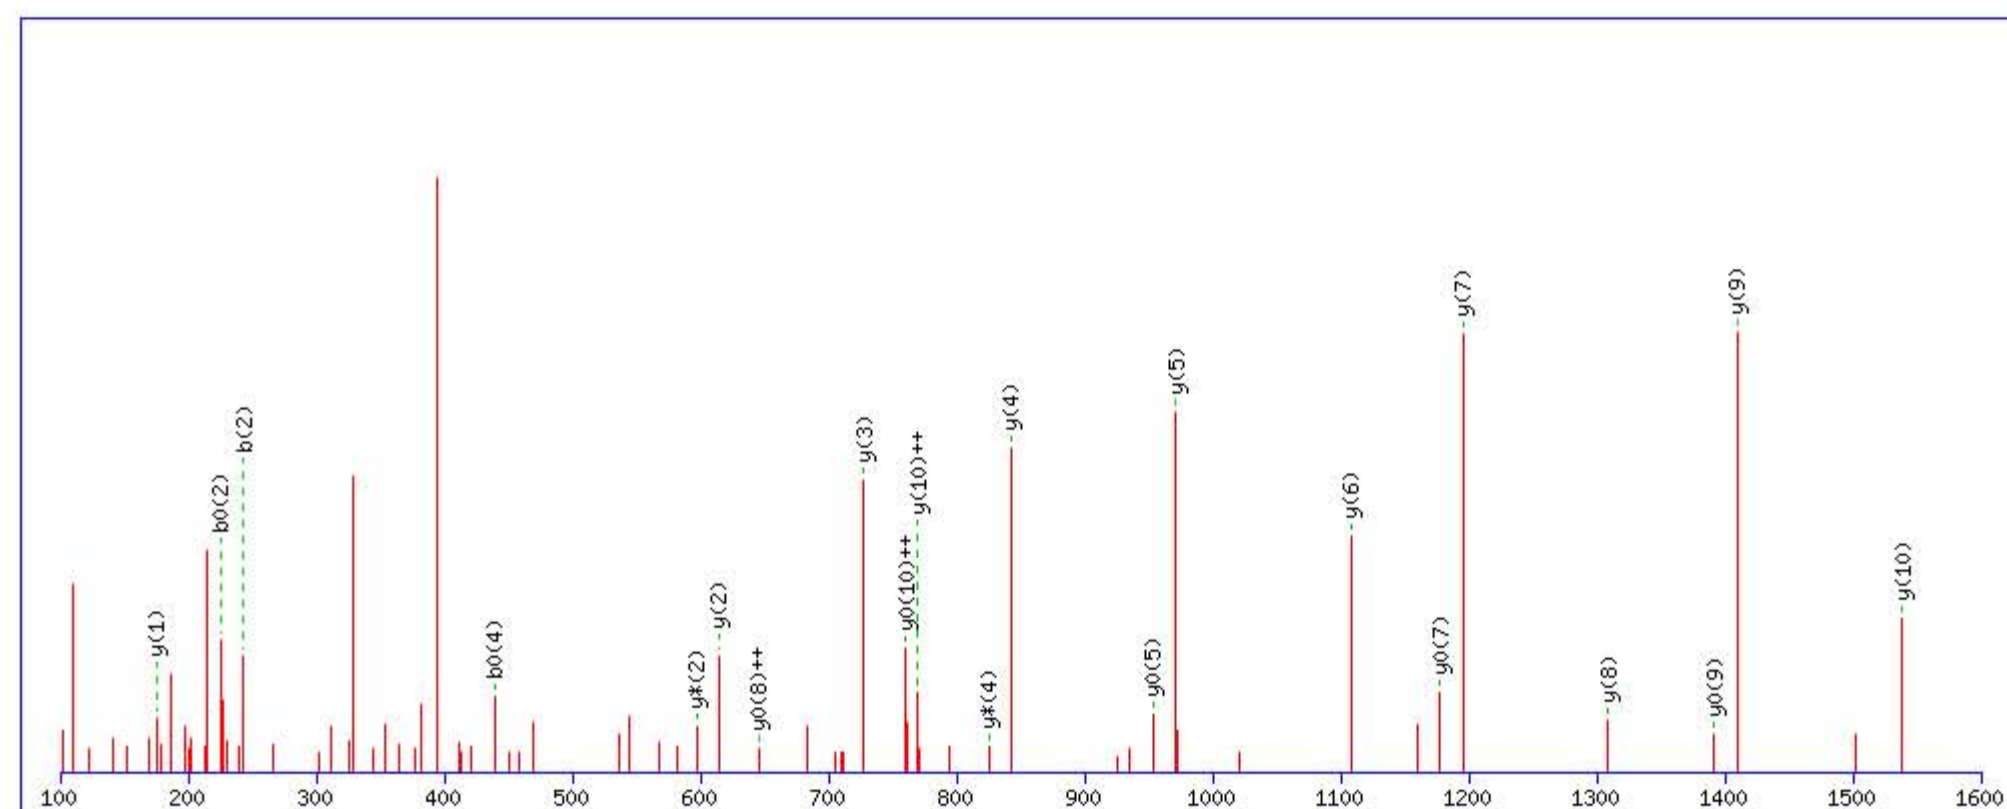

Monoisotopic mass of neutral peptide Mr(calc): 1650.839920

Fixed modifications: Carbamidomethyl (C) (apply to specified residues or termini only)

Variable modifications:

Q10 : Biotin:Thermo-21345 (Q)

Ions Score: 62 Expect: 3.6e-006

Matches : 21/94 fragment ions using 35 most intense peaks [\(help\)](#)

| #  | b           | b <sup>++</sup> | b <sup>*</sup> | b <sup>*++</sup> | b <sup>0</sup> | b <sup>0++</sup> | Seq. | y           | y <sup>++</sup> | y <sup>*</sup> | y <sup>*++</sup> | y <sup>0</sup> | y <sup>0++</sup> | #  |
|----|-------------|-----------------|----------------|------------------|----------------|------------------|------|-------------|-----------------|----------------|------------------|----------------|------------------|----|
| 1  | 114.091340  | 57.549308       |                |                  |                |                  | I    |             |                 |                |                  |                |                  | 11 |
| 2  | 243.133933  | 122.070605      |                |                  | 225.123368     | 113.065322       | E    | 1538.763154 | 769.885215      | 1521.736605    | 761.371941       | 1520.752589    | 760.879933       | 10 |
| 3  | 344.181612  | 172.594444      |                |                  | 326.171047     | 163.589162       | T    | 1409.720561 | 705.363919      | 1392.694012    | 696.850644       | 1391.709996    | 696.358636       | 9  |
| 4  | 457.265676  | 229.136476      |                |                  | 439.255111     | 220.131194       | I    | 1308.672882 | 654.840079      | 1291.646333    | 646.326805       | 1290.662317    | 645.834797       | 8  |
| 5  | 544.297704  | 272.652490      |                |                  | 526.287139     | 263.647208       | S    | 1195.588818 | 598.298047      | 1178.562269    | 589.784773       | 1177.578253    | 589.292764       | 7  |
| 6  | 681.356616  | 341.181946      |                |                  | 663.346051     | 332.176664       | H    | 1108.556790 | 554.782033      | 1091.530241    | 546.268759       | 1090.546225    | 545.776751       | 6  |
| 7  | 810.399209  | 405.703243      |                |                  | 792.388644     | 396.697960       | E    | 971.497878  | 486.252577      | 954.471329     | 477.739303       | 953.487313     | 477.247295       | 5  |
| 8  | 925.426152  | 463.216714      |                |                  | 907.415587     | 454.211432       | D    | 842.455285  | 421.731281      | 825.428736     | 413.218006       | 824.444720     | 412.725998       | 4  |
| 9  | 1038.510216 | 519.758746      |                |                  | 1020.499651    | 510.753463       | L    | 727.428342  | 364.217809      | 710.401793     | 355.704535       |                |                  | 3  |
| 10 | 1477.735542 | 739.371409      | 1460.708993    | 730.858135       | 1459.724977    | 730.366127       | Q    | 614.344278  | 307.675777      | 597.317729     | 299.162503       |                |                  | 2  |
| 11 |             |                 |                |                  |                |                  | R    | 175.118952  | 88.063114       | 158.092403     | 79.549839        |                |                  | 1  |

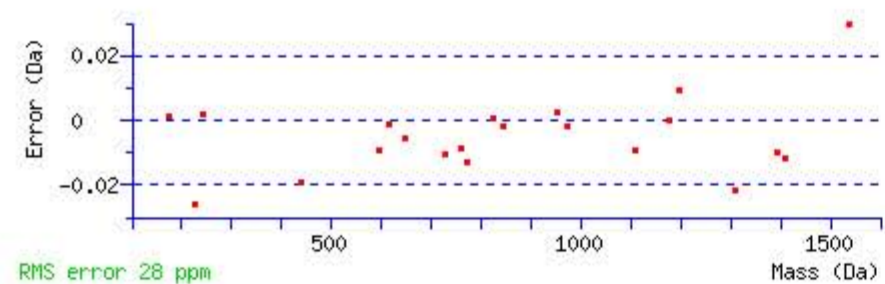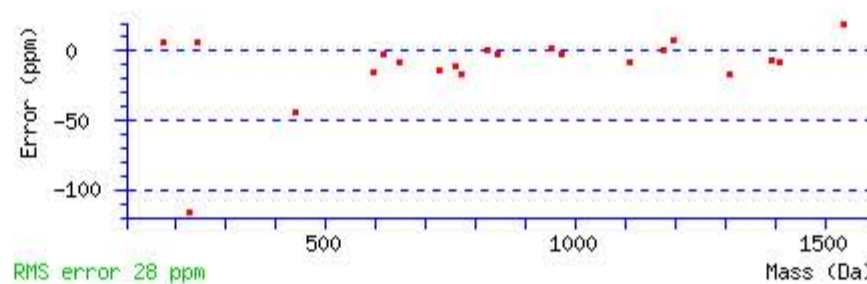

NCBI BLAST search of **IETISHEDLQR**

(Parameters: blastp, nr protein database, expect=20000, no filter, PAM30)

Other BLAST [web gateways](#)

All matches to this query

| Score | Mr(calc):   | Delta     | Sequence                       |
|-------|-------------|-----------|--------------------------------|
| 61.7  | 1650.839920 | -0.006898 | <a href="#">IETISHEDLQR</a>    |
| 3.5   | 1650.847305 | -0.014283 | <a href="#">LLFQELMSMSIAPR</a> |
| 3.0   | 1650.821274 | 0.011748  | <a href="#">ELSRLDKELDDYR</a>  |

Mascot: <http://www.matrixscience.com/>

# MASCOT Search Results

## Peptide View

MS/MS Fragmentation of **IQALSLCSDQQSHLEFR**

Found in **PROS\_HUMAN**, Vitamin K-dependent protein S OS=Homo sapiens GN=PROS1 PE=1 SV=1

Match to Query 45751: 2342.152902 from(781.724910,3+) rtinseconds(2246) index(47540)

Title: Locus:1.1.1.3494.24 File:"2013-07-02 CLN FXIII 180 min 3rd F 4.wiff"

Data file C:\Program Files (x86)\Matrix Science\Mascot Daemon\mgf\9 FXIII 180 min 3rd\mascot\_daemon\_merge.mgf

Click mouse within plot area to zoom in by factor of two about that point

Or, Plot from  to  Da

Label all possible matches  Label matches used for scoring

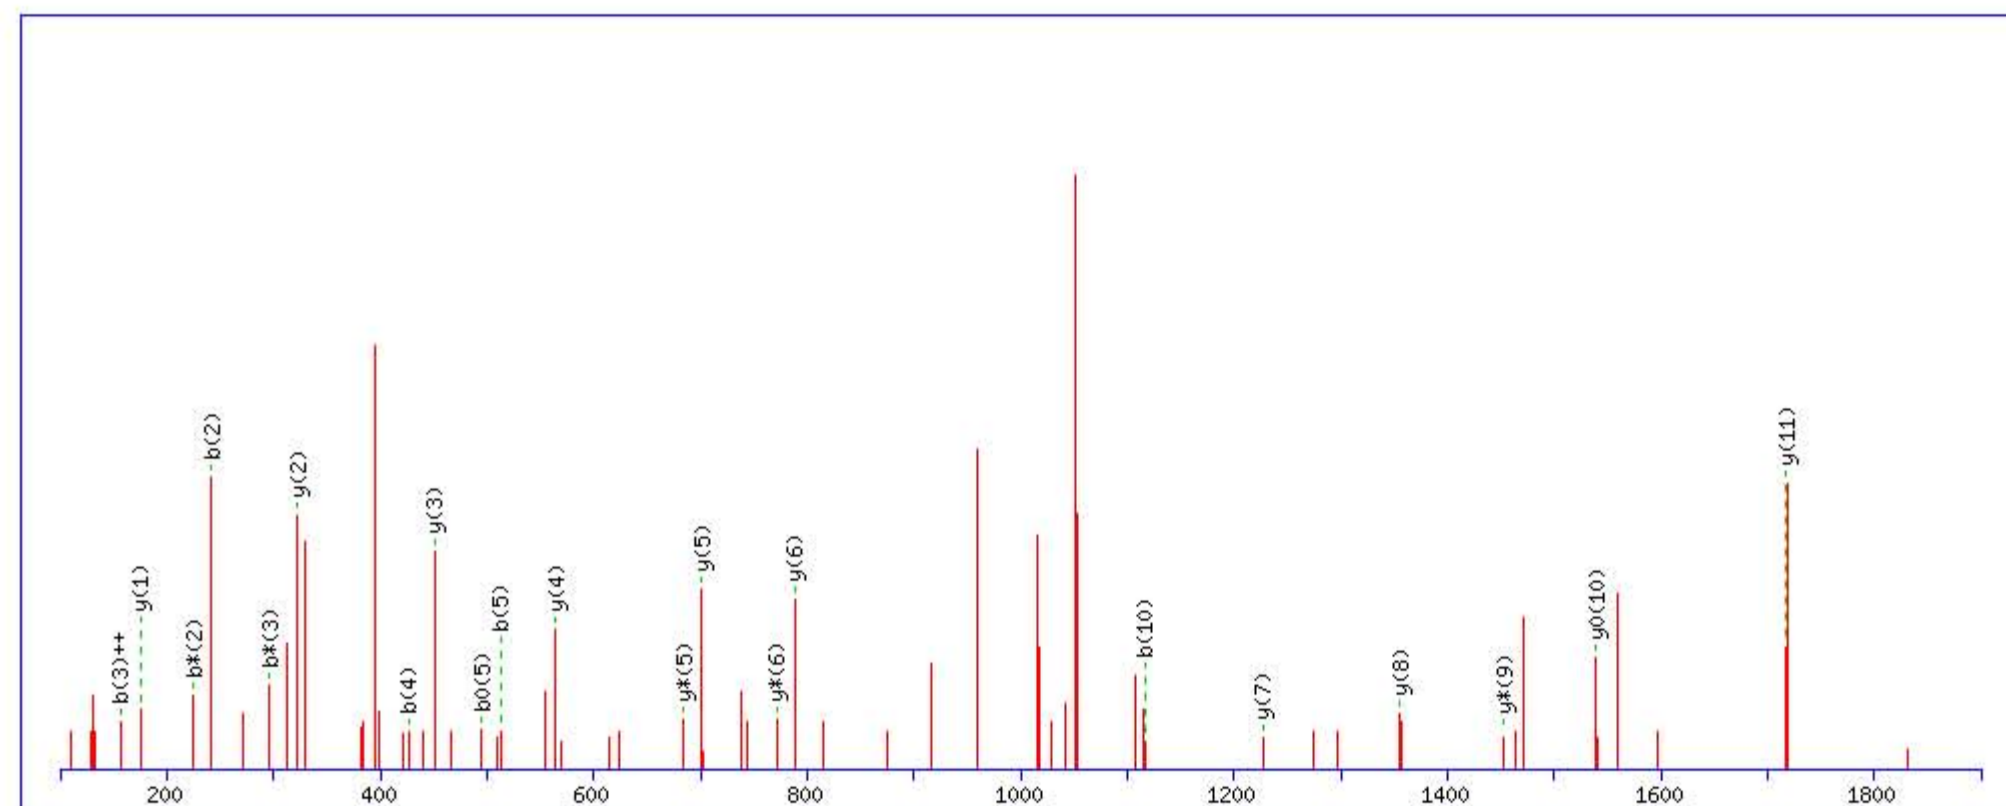

Monoisotopic mass of neutral peptide Mr(calc): 2342.151108

Fixed modifications: Carbamidomethyl (C) (apply to specified residues or termini only)

Variable modifications:

Q11 : Biotin:Thermo-21345 (Q)

Ions Score: 33 Expect: 0.014

Matches : 21/178 fragment ions using 47 most intense peaks [\(help\)](#)

| #  | b                  | b <sup>++</sup>   | b <sup>+</sup>    | b <sup>+++</sup> | b <sup>0</sup>    | b <sup>0++</sup> | Seq. | y                  | y <sup>++</sup> | y <sup>+</sup>     | y <sup>+++</sup> | y <sup>0</sup>     | y <sup>0++</sup> | #  |
|----|--------------------|-------------------|-------------------|------------------|-------------------|------------------|------|--------------------|-----------------|--------------------|------------------|--------------------|------------------|----|
| 1  | 114.091340         | 57.549308         |                   |                  |                   |                  | I    |                    |                 |                    |                  |                    |                  | 17 |
| 2  | <b>242.149918</b>  | 121.578597        | <b>225.123369</b> | 113.065323       |                   |                  | Q    | 2230.074335        | 1115.540805     | 2213.047786        | 1107.027531      | 2212.063770        | 1106.535523      | 16 |
| 3  | 313.187032         | <b>157.097154</b> | <b>296.160483</b> | 148.583879       |                   |                  | A    | 2102.015757        | 1051.511516     | 2084.989208        | 1042.998242      | 2084.005192        | 1042.506234      | 15 |
| 4  | <b>426.271096</b>  | 213.639186        | 409.244547        | 205.125912       |                   |                  | L    | 2030.978643        | 1015.992959     | 2013.952094        | 1007.479685      | 2012.968078        | 1006.987677      | 14 |
| 5  | <b>513.303124</b>  | 257.155200        | 496.276575        | 248.641926       | <b>495.292559</b> | 248.149918       | S    | 1917.894579        | 959.450927      | 1900.868030        | 950.937653       | 1899.884014        | 950.445645       | 13 |
| 6  | 626.387188         | 313.697232        | 609.360639        | 305.183958       | 608.376623        | 304.691950       | L    | 1830.862551        | 915.934913      | 1813.836002        | 907.421639       | 1812.851986        | 906.929631       | 12 |
| 7  | 786.417837         | 393.712557        | 769.391288        | 385.199282       | 768.407272        | 384.707274       | C    | <b>1717.778487</b> | 859.392881      | 1700.751938        | 850.879607       | 1699.767922        | 850.387599       | 11 |
| 8  | 873.449865         | 437.228571        | 856.423316        | 428.715296       | 855.439300        | 428.223288       | S    | 1557.747838        | 779.377557      | 1540.721289        | 770.864282       | <b>1539.737273</b> | 770.372274       | 10 |
| 9  | 988.476808         | 494.742042        | 971.450259        | 486.228768       | 970.466243        | 485.736760       | D    | 1470.715810        | 735.861543      | <b>1453.689261</b> | 727.348268       | 1452.705245        | 726.856260       | 9  |
| 10 | <b>1116.535386</b> | 558.771331        | 1099.508837       | 550.258057       | 1098.524821       | 549.766049       | Q    | <b>1355.688867</b> | 678.348071      | 1338.662318        | 669.834797       | 1337.678302        | 669.342789       | 8  |
| 11 | 1555.760712        | 778.383994        | 1538.734163       | 769.870720       | 1537.750147       | 769.378712       | Q    | <b>1227.630289</b> | 614.318782      | 1210.603740        | 605.805508       | 1209.619724        | 605.313500       | 7  |
| 12 | 1642.792740        | 821.900008        | 1625.766191       | 813.386734       | 1624.782175       | 812.894726       | S    | <b>788.404963</b>  | 394.706119      | <b>771.378414</b>  | 386.192845       | 770.394398         | 385.700837       | 6  |
| 13 | 1779.851652        | 890.429464        | 1762.825103       | 881.916190       | 1761.841087       | 881.424182       | H    | <b>701.372935</b>  | 351.190105      | <b>684.346386</b>  | 342.676831       | 683.362370         | 342.184823       | 5  |
| 14 | 1892.935716        | 946.971496        | 1875.909167       | 938.458222       | 1874.925151       | 937.966213       | L    | <b>564.314023</b>  | 282.660649      | 547.287474         | 274.147375       | 546.303458         | 273.655367       | 4  |
| 15 | 2021.978309        | 1011.492793       | 2004.951760       | 1002.979518      | 2003.967744       | 1002.487510      | E    | <b>451.229959</b>  | 226.118617      | 434.203410         | 217.605343       | 433.219394         | 217.113335       | 3  |
| 16 | 2169.046723        | 1085.026999       | 2152.020174       | 1076.513725      | 2151.036158       | 1076.021717      | F    | <b>322.187366</b>  | 161.597321      | 305.160817         | 153.084046       |                    |                  | 2  |
| 17 |                    |                   |                   |                  |                   |                  | R    | <b>175.118952</b>  | 88.063114       | 158.092403         | 79.549839        |                    |                  | 1  |

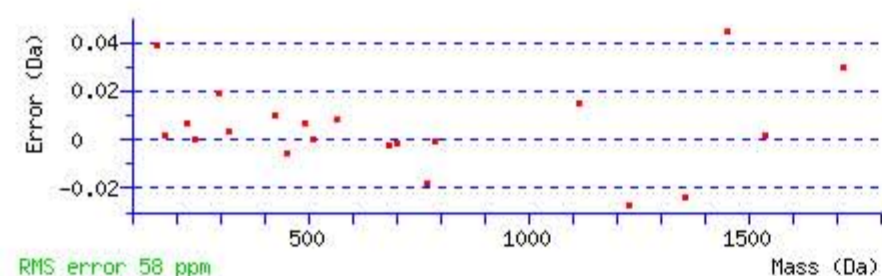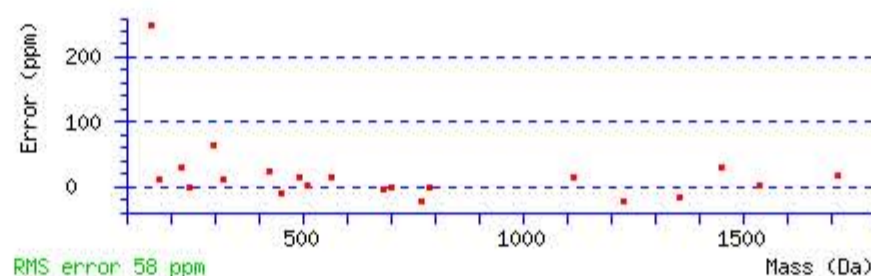

NCBI BLAST search of **IQALSLCSDQQSHLEFR**

(Parameters: blastp, nr protein database, expect=20000, no filter, PAM30)

Other BLAST [web gateways](#)

## All matches to this query

| Score | Mr(calc):   | Delta    | Sequence                          |
|-------|-------------|----------|-----------------------------------|
| 33.1  | 2342.151108 | 0.001794 | <a href="#">IQALSLCSDQQSHLEFR</a> |
| 30.5  | 2342.151108 | 0.001794 | <a href="#">IQALSLCSDQQSHLEFR</a> |
| 10.2  | 2342.151108 | 0.001794 | <a href="#">IQALSLCSDQQSHLEFR</a> |

# MASCOT Search Results

## Peptide View

MS/MS Fragmentation of **IQALSLCSDQQSHLEFR**

Found in **PROS\_HUMAN**, Vitamin K-dependent protein S OS=Homo sapiens GN=PROS1 PE=1 SV=1

Match to Query 45756: 2342.177428 from(1172.095990,2+) rtinseconds(2194) index(61620)

Title: Locus:1.1.1.1675.22 File:"2013-07-02 CLN FXIII 180 min 3rd FT.wiff"

Data file C:\Program Files (x86)\Matrix Science\Mascot Daemon\mgf9 FXIII 180 min 3rd\mascot\_daemon\_merge.mgf

Click mouse within plot area to zoom in by factor of two about that point

Or, Plot from  to  Da

Label all possible matches  Label matches used for scoring

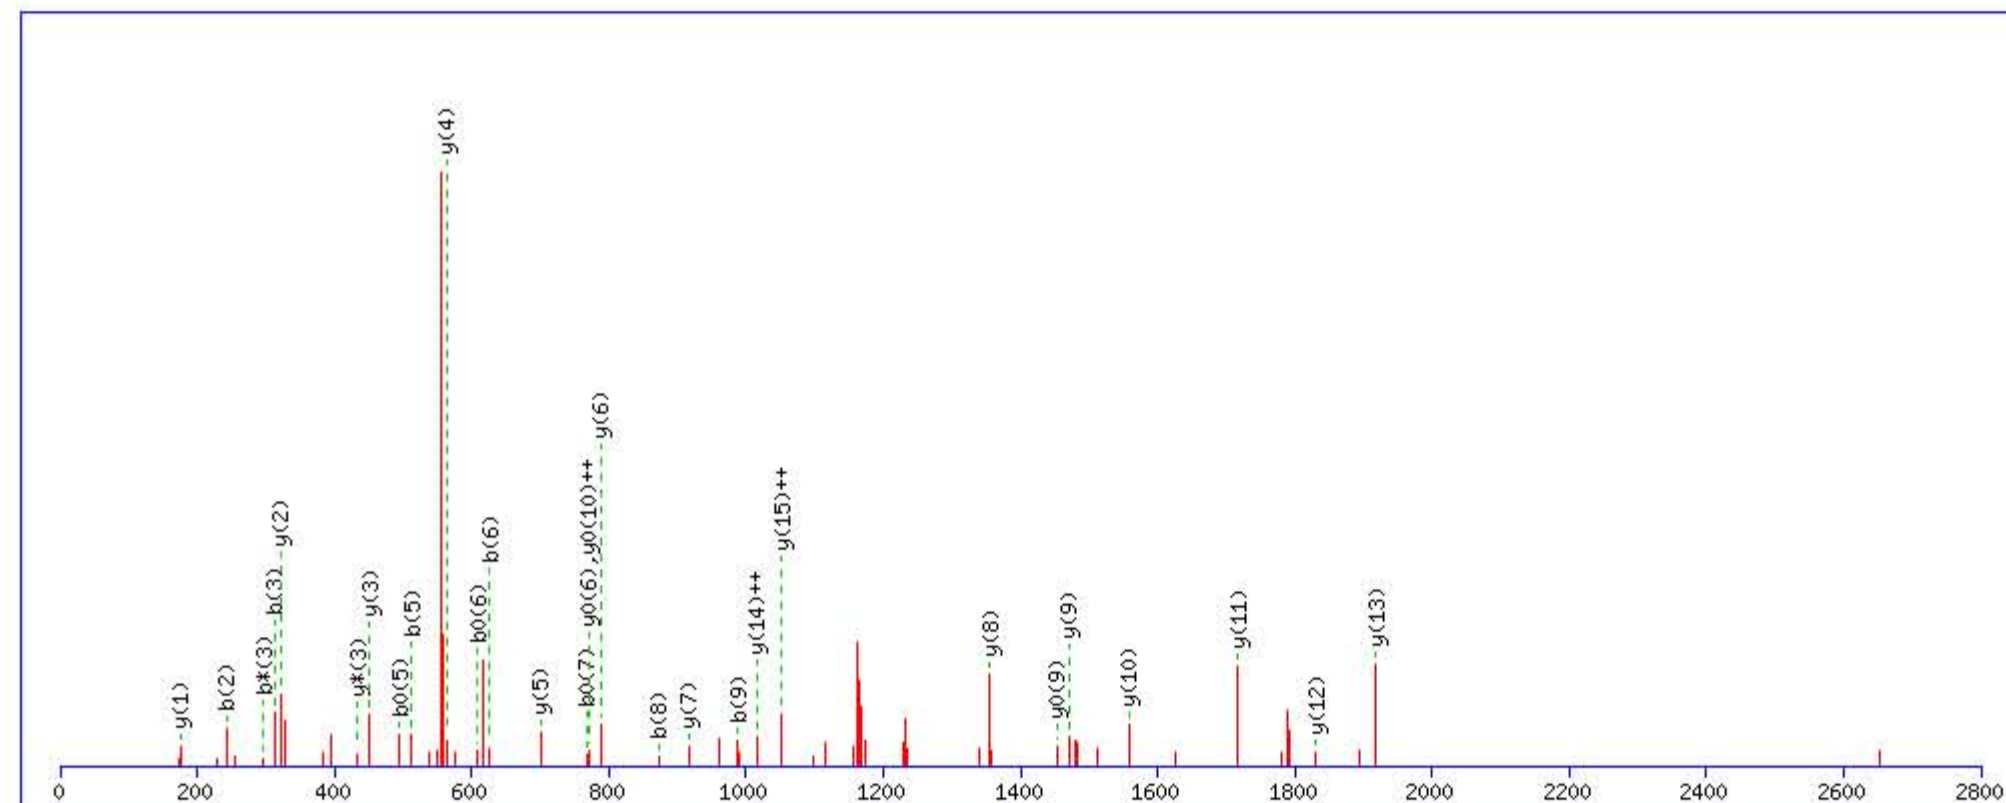

Monoisotopic mass of neutral peptide Mr(calc): 2342.151108

Fixed modifications: Carbamidomethyl (C) (apply to specified residues or termini only)

Variable modifications:

Q10 : Biotin:Thermo-21345 (Q)

Ions Score: 54 Expect: 0.00011

Matches : 29/178 fragment ions using 74 most intense peaks [\(help\)](#)

| #  | b                 | b <sup>++</sup> | b <sup>+</sup>    | b <sup>+++</sup> | b <sup>0</sup>    | b <sup>0++</sup> | Seq. | y                  | y <sup>++</sup>    | y <sup>+</sup>    | y <sup>+++</sup> | y <sup>0</sup>     | y <sup>0++</sup>  | #  |
|----|-------------------|-----------------|-------------------|------------------|-------------------|------------------|------|--------------------|--------------------|-------------------|------------------|--------------------|-------------------|----|
| 1  | 114.091340        | 57.549308       |                   |                  |                   |                  | I    |                    |                    |                   |                  |                    |                   | 17 |
| 2  | <b>242.149918</b> | 121.578597      | 225.123369        | 113.065323       |                   |                  | Q    | 2230.074335        | 1115.540805        | 2213.047786       | 1107.027531      | 2212.063770        | 1106.535523       | 16 |
| 3  | <b>313.187032</b> | 157.097154      | <b>296.160483</b> | 148.583879       |                   |                  | A    | 2102.015757        | <b>1051.511516</b> | 2084.989208       | 1042.998242      | 2084.005192        | 1042.506234       | 15 |
| 4  | 426.271096        | 213.639186      | 409.244547        | 205.125912       |                   |                  | L    | 2030.978643        | <b>1015.992959</b> | 2013.952094       | 1007.479685      | 2012.968078        | 1006.987677       | 14 |
| 5  | <b>513.303124</b> | 257.155200      | 496.276575        | 248.641926       | <b>495.292559</b> | 248.149918       | S    | <b>1917.894579</b> | 959.450927         | 1900.868030       | 950.937653       | 1899.884014        | 950.445645        | 13 |
| 6  | <b>626.387188</b> | 313.697232      | 609.360639        | 305.183958       | <b>608.376623</b> | 304.691950       | L    | <b>1830.862551</b> | 915.934913         | 1813.836002       | 907.421639       | 1812.851986        | 906.929631        | 12 |
| 7  | 786.417837        | 393.712557      | 769.391288        | 385.199282       | <b>768.407272</b> | 384.707274       | C    | <b>1717.778487</b> | 859.392881         | 1700.751938       | 850.879607       | 1699.767922        | 850.387599        | 11 |
| 8  | <b>873.449865</b> | 437.228571      | 856.423316        | 428.715296       | 855.439300        | 428.223288       | S    | <b>1557.747838</b> | 779.377557         | 1540.721289       | 770.864282       | 1539.737273        | <b>770.372274</b> | 10 |
| 9  | <b>988.476808</b> | 494.742042      | 971.450259        | 486.228768       | 970.466243        | 485.736760       | D    | <b>1470.715810</b> | 735.861543         | 1453.689261       | 727.348268       | <b>1452.705245</b> | 726.856260        | 9  |
| 10 | 1427.702134       | 714.354705      | 1410.675585       | 705.841431       | 1409.691569       | 705.349422       | Q    | <b>1355.688867</b> | 678.348071         | 1338.662318       | 669.834797       | 1337.678302        | 669.342789        | 8  |
| 11 | 1555.760712       | 778.383994      | 1538.734163       | 769.870720       | 1537.750147       | 769.378712       | Q    | <b>916.463541</b>  | 458.735408         | 899.436992        | 450.222134       | 898.452976         | 449.730126        | 7  |
| 12 | 1642.792740       | 821.900008      | 1625.766191       | 813.386734       | 1624.782175       | 812.894726       | S    | <b>788.404963</b>  | 394.706119         | 771.378414        | 386.192845       | <b>770.394398</b>  | 385.700837        | 6  |
| 13 | 1779.851652       | 890.429464      | 1762.825103       | 881.916190       | 1761.841087       | 881.424182       | H    | <b>701.372935</b>  | 351.190105         | 684.346386        | 342.676831       | 683.362370         | 342.184823        | 5  |
| 14 | 1892.935716       | 946.971496      | 1875.909167       | 938.458222       | 1874.925151       | 937.966213       | L    | <b>564.314023</b>  | 282.660649         | 547.287474        | 274.147375       | 546.303458         | 273.655367        | 4  |
| 15 | 2021.978309       | 1011.492793     | 2004.951760       | 1002.979518      | 2003.967744       | 1002.487510      | E    | <b>451.229959</b>  | 226.118617         | <b>434.203410</b> | 217.605343       | 433.219394         | 217.113335        | 3  |
| 16 | 2169.046723       | 1085.026999     | 2152.020174       | 1076.513725      | 2151.036158       | 1076.021717      | F    | <b>322.187366</b>  | 161.597321         | 305.160817        | 153.084046       |                    |                   | 2  |
| 17 |                   |                 |                   |                  |                   |                  | R    | <b>175.118952</b>  | 88.063114          | 158.092403        | 79.549839        |                    |                   | 1  |

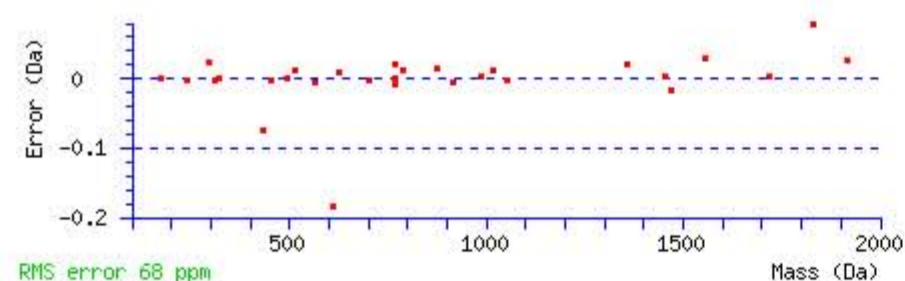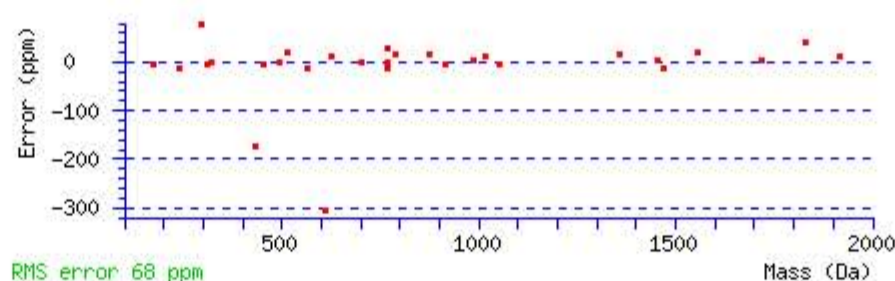

NCBI BLAST search of **IQALSLCSDQQSHLEFR**

(Parameters: blastp, nr protein database, expect=20000, no filter, PAM30)

Other BLAST [web gateways](#)

## All matches to this query

| Score | Mr(calc):   | Delta    | Sequence                          |
|-------|-------------|----------|-----------------------------------|
| 54.4  | 2342.151108 | 0.026320 | <a href="#">IQALSLCSDQQSHLEFR</a> |
| 46.4  | 2342.151108 | 0.026320 | <a href="#">IQALSLCSDQQSHLEFR</a> |
| 6.8   | 2342.151108 | 0.026320 | <a href="#">IQALSLCSDQQSHLEFR</a> |

# MASCOT SEARCH RESULTS

## Peptide View

MS/MS Fragmentation of **APDLQDLPWQVK**

Found in **PROZ\_HUMAN**, Vitamin K-dependent protein Z OS=Homo sapiens GN=PROZ PE=1 SV=2

Match to Query 34059: 1719.909528 from(860.962040,2+) rtinseconds(2544) index(49039)

Title: Locus:1.1.1.3598.4 File:"2013-07-02 CLN FXIII 180 min 3rd F 4.wiff"

Data file C:\Program Files (x86)\Matrix Science\Mascot Daemon\mgf\9 FXIII 180 min 3rd\mascot\_daemon\_merge.mgf

Click mouse within plot area to zoom in by factor of two about that point

Or, Plot from  to  Da

Label all possible matches  Label matches used for scoring

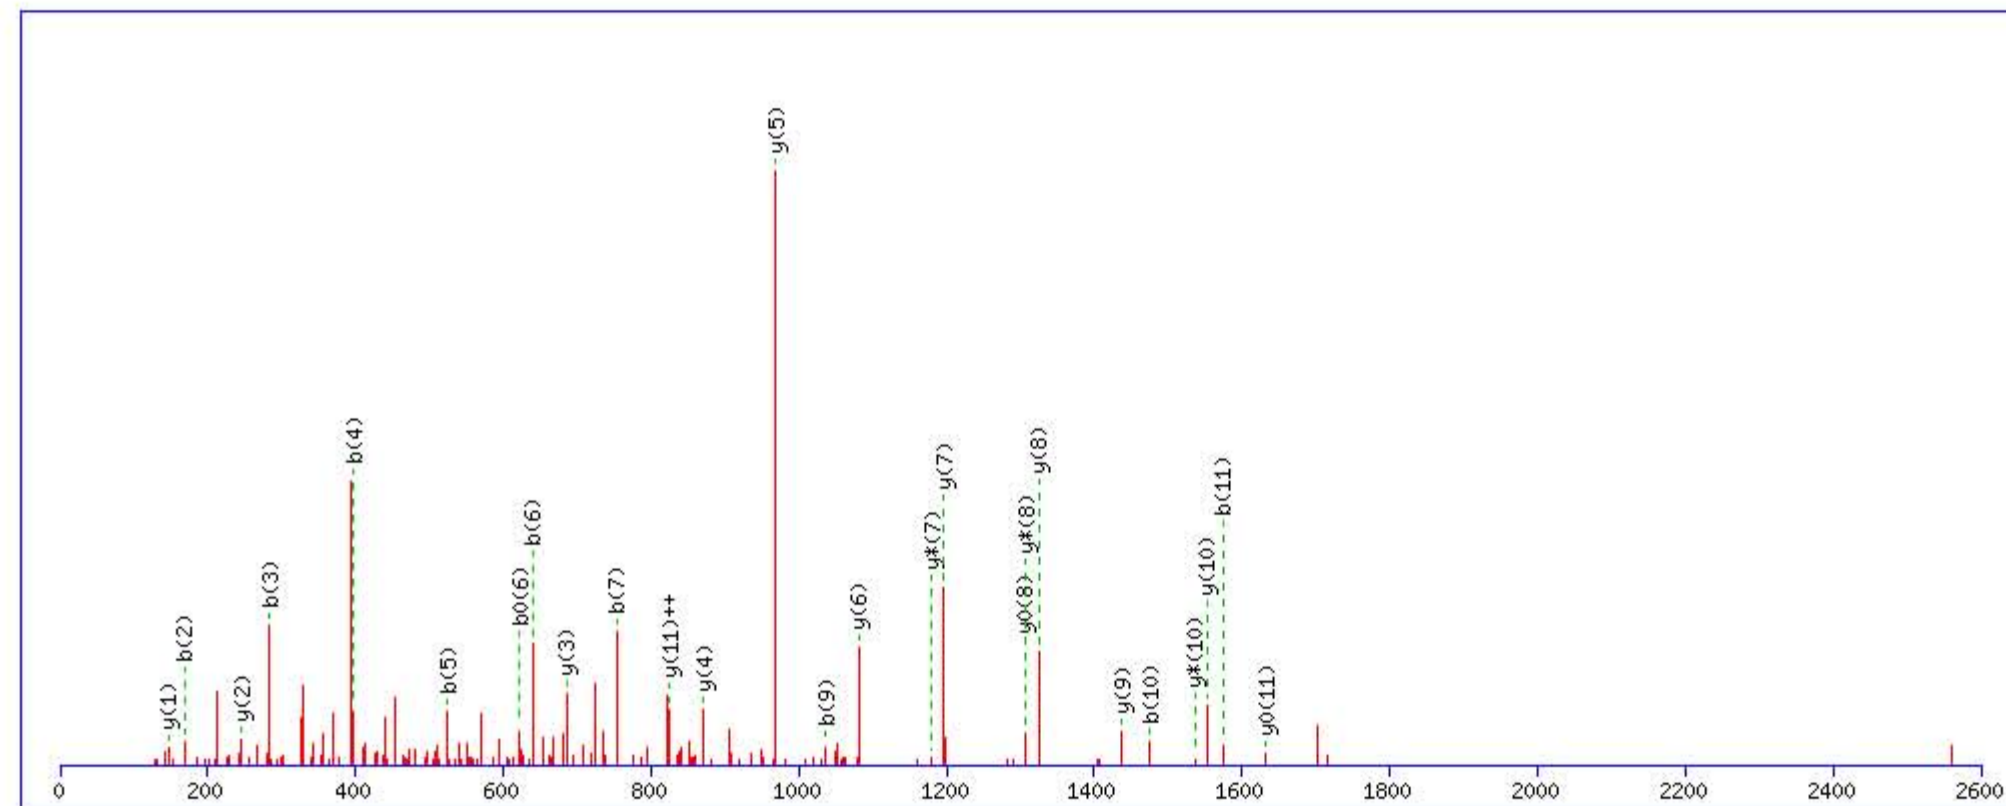

Monoisotopic mass of neutral peptide Mr(calc): 1719.901810

Fixed modifications: Carbamidomethyl (C) (apply to specified residues or termini only)

Variable modifications:

Q10 : Biotin:Thermo-21345 (Q)

Ions Score: 63 Expect: 1.1e-005

Matches : 26/108 fragment ions using 46 most intense peaks [\(help\)](#)

| #  | b                  | b <sup>++</sup> | b <sup>+</sup> | b <sup>+++</sup> | b <sup>0</sup>    | b <sup>0++</sup> | Seq. | y                  | y <sup>++</sup>   | y <sup>+</sup>     | y <sup>+++</sup> | y <sup>0</sup>     | y <sup>0++</sup> | #  |
|----|--------------------|-----------------|----------------|------------------|-------------------|------------------|------|--------------------|-------------------|--------------------|------------------|--------------------|------------------|----|
| 1  | 72.044390          | 36.525833       |                |                  |                   |                  | A    |                    |                   |                    |                  |                    |                  | 12 |
| 2  | <b>169.097154</b>  | 85.052215       |                |                  |                   |                  | P    | 1649.871977        | <b>825.439627</b> | 1632.845428        | 816.926352       | <b>1631.861412</b> | 816.434344       | 11 |
| 3  | <b>284.124097</b>  | 142.565687      |                |                  | 266.113532        | 133.560404       | D    | <b>1552.819213</b> | 776.913245        | <b>1535.792664</b> | 768.399970       | 1534.808648        | 767.907962       | 10 |
| 4  | <b>397.208161</b>  | 199.107719      |                |                  | 379.197596        | 190.102436       | L    | <b>1437.792270</b> | 719.399773        | 1420.765721        | 710.886499       | 1419.781705        | 710.394491       | 9  |
| 5  | <b>525.266739</b>  | 263.137008      | 508.240190     | 254.623733       | 507.256174        | 254.131725       | Q    | <b>1324.708206</b> | 662.857741        | <b>1307.681657</b> | 654.344467       | <b>1306.697641</b> | 653.852459       | 8  |
| 6  | <b>640.293682</b>  | 320.650479      | 623.267133     | 312.137205       | <b>622.283117</b> | 311.645197       | D    | <b>1196.649628</b> | 598.828452        | <b>1179.623079</b> | 590.315178       | 1178.639063        | 589.823170       | 7  |
| 7  | <b>753.377746</b>  | 377.192511      | 736.351197     | 368.679237       | 735.367181        | 368.187229       | L    | <b>1081.622685</b> | 541.314981        | 1064.596136        | 532.801706       |                    |                  | 6  |
| 8  | 850.430510         | 425.718893      | 833.403961     | 417.205619       | 832.419945        | 416.713611       | P    | <b>968.538621</b>  | 484.772949        | 951.512072         | 476.259674       |                    |                  | 5  |
| 9  | <b>1036.509823</b> | 518.758550      | 1019.483274    | 510.245275       | 1018.499258       | 509.753267       | W    | <b>871.485857</b>  | 436.246567        | 854.459308         | 427.733292       |                    |                  | 4  |
| 10 | <b>1475.735149</b> | 738.371213      | 1458.708600    | 729.857938       | 1457.724584       | 729.365930       | Q    | <b>685.406544</b>  | 343.206910        | 668.379995         | 334.693636       |                    |                  | 3  |
| 11 | <b>1574.803563</b> | 787.905420      | 1557.777014    | 779.392145       | 1556.792998       | 778.900137       | V    | <b>246.181218</b>  | 123.594247        | 229.154669         | 115.080973       |                    |                  | 2  |
| 12 |                    |                 |                |                  |                   |                  | K    | <b>147.112804</b>  | 74.060040         | 130.086255         | 65.546765        |                    |                  | 1  |

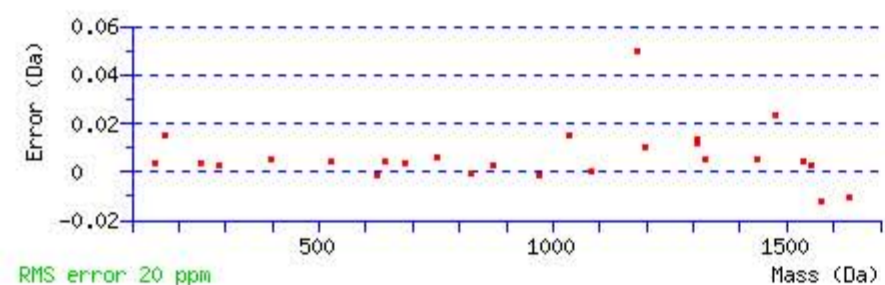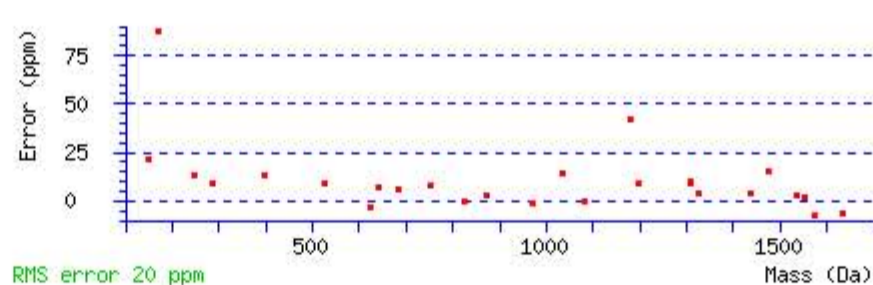

NCBI BLAST search of [APDLQDLPWQVK](#)

(Parameters: blastp, nr protein database, expect=20000, no filter, PAM30)

Other BLAST [web gateways](#)

All matches to this query

| Score | Mr(calc):   | Delta    | Sequence                        |
|-------|-------------|----------|---------------------------------|
| 62.8  | 1719.901810 | 0.007718 | <a href="#">APDLQDLPWQVK</a>    |
| 16.0  | 1719.901810 | 0.007718 | <a href="#">APDLQDLPWQVK</a>    |
| 11.8  | 1719.907715 | 0.001813 | <a href="#">VLAGVVMITGIDVKA</a> |
| 4.3   | 1719.897766 | 0.011762 | <a href="#">LVHNKPPTMKPEGEK</a> |

Mascot: <http://www.matrixscience.com/>



# MASCOT Search Results

## Peptide View

MS/MS Fragmentation of **QCVPHDQCACGVLTSK**

Found in **PROZ\_HUMAN**, Vitamin K-dependent protein Z OS=Homo sapiens GN=PROZ PE=1 SV=2

Match to Query 45084: 2299.016742 from(767.346190,3+) rtinseconds(1658) index(43917)

Title: Locus:1.1.1.3290.8 File:"2013-07-02 CLN FXIII 180 min 3rd F 4.wiff"

Data file C:\Program Files (x86)\Matrix Science\Mascot Daemon\mgf9 FXIII 180 min 3rd\mascot\_daemon\_merge.mgf

Click mouse within plot area to zoom in by factor of two about that point

Or, Plot from  to  Da

Label all possible matches  Label matches used for scoring

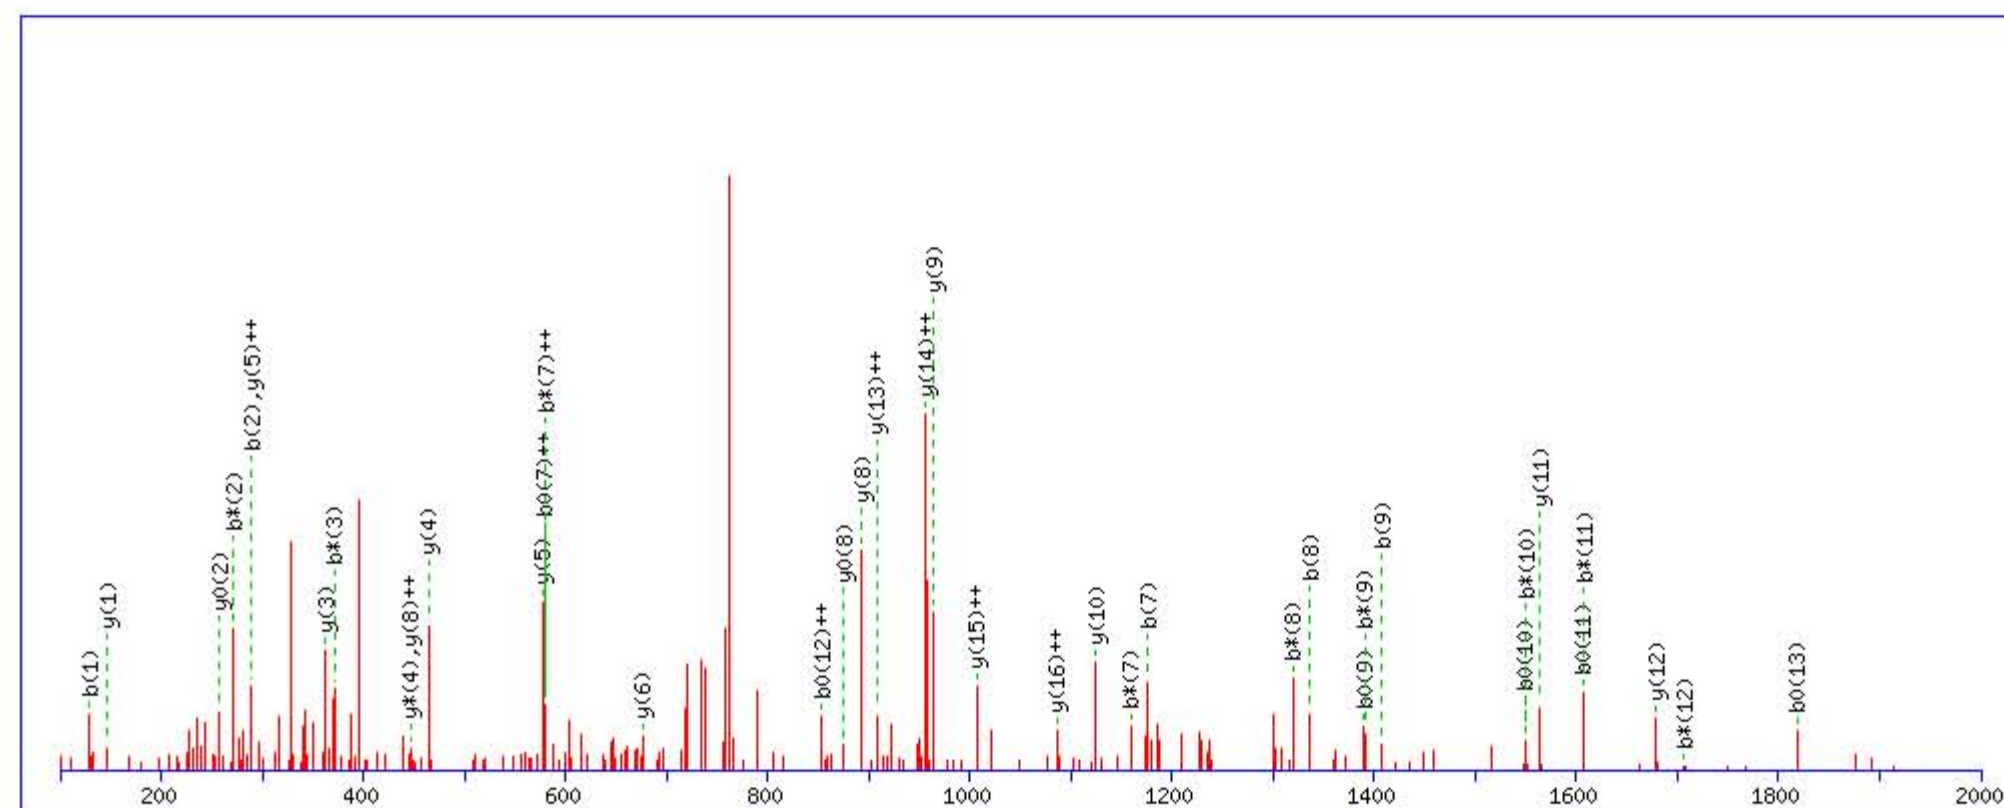

Monoisotopic mass of neutral peptide Mr(calc): 2299.021790

Fixed modifications: Carbamidomethyl (C) (apply to specified residues or termini only)

Variable modifications:

Q7 : Biotin:Thermo-21345 (Q)

Ions Score: 48 Expect: 0.00012

Matches : 39/180 fragment ions using 72 most intense peaks [\(help\)](#)

| #  | b           | b <sup>++</sup> | b <sup>*</sup> | b <sup>***</sup> | b <sup>0</sup> | b <sup>0++</sup> | Seq. | y           | y <sup>++</sup> | y <sup>*</sup> | y <sup>***</sup> | y <sup>0</sup> | y <sup>0++</sup> | #  |
|----|-------------|-----------------|----------------|------------------|----------------|------------------|------|-------------|-----------------|----------------|------------------|----------------|------------------|----|
| 1  | 129.065854  | 65.036565       | 112.039305     | 56.523291        |                |                  | Q    |             |                 |                |                  |                |                  | 17 |
| 2  | 289.096503  | 145.051890      | 272.069954     | 136.538615       |                |                  | C    | 2171.970466 | 1086.488871     | 2154.943917    | 1077.975596      | 2153.959901    | 1077.483588      | 16 |
| 3  | 388.164917  | 194.586097      | 371.138368     | 186.072822       |                |                  | V    | 2011.939817 | 1006.473547     | 1994.913268    | 997.960272       | 1993.929252    | 997.468264       | 15 |
| 4  | 485.217681  | 243.112479      | 468.191132     | 234.599204       |                |                  | P    | 1912.871403 | 956.939340      | 1895.844854    | 948.426065       | 1894.860838    | 947.934057       | 14 |
| 5  | 622.276593  | 311.641935      | 605.250044     | 303.128660       |                |                  | H    | 1815.818639 | 908.412958      | 1798.792090    | 899.899683       | 1797.808074    | 899.407675       | 13 |
| 6  | 737.303536  | 369.155406      | 720.276987     | 360.642132       | 719.292971     | 360.150124       | D    | 1678.759727 | 839.883502      | 1661.733178    | 831.370227       | 1660.749162    | 830.878219       | 12 |
| 7  | 1176.528862 | 588.768069      | 1159.502313    | 580.254795       | 1158.518297    | 579.762786       | Q    | 1563.732784 | 782.370030      | 1546.706235    | 773.856756       | 1545.722219    | 773.364748       | 11 |
| 8  | 1336.559511 | 668.783393      | 1319.532962    | 660.270119       | 1318.548946    | 659.778111       | C    | 1124.507458 | 562.757367      | 1107.480909    | 554.244093       | 1106.496893    | 553.752085       | 10 |
| 9  | 1407.596625 | 704.301950      | 1390.570076    | 695.788676       | 1389.586060    | 695.296668       | A    | 964.476809  | 482.742043      | 947.450260     | 474.228768       | 946.466244     | 473.736760       | 9  |
| 10 | 1567.627274 | 784.317275      | 1550.600725    | 775.804001       | 1549.616709    | 775.311992       | C    | 893.439695  | 447.223486      | 876.413146     | 438.710211       | 875.429130     | 438.218203       | 8  |
| 11 | 1624.648738 | 812.828007      | 1607.622189    | 804.314732       | 1606.638173    | 803.822724       | G    | 733.409046  | 367.208161      | 716.382497     | 358.694887       | 715.398481     | 358.202879       | 7  |
| 12 | 1723.717152 | 862.362214      | 1706.690603    | 853.848940       | 1705.706587    | 853.356931       | V    | 676.387582  | 338.697429      | 659.361033     | 330.184155       | 658.377017     | 329.692147       | 6  |
| 13 | 1836.801216 | 918.904246      | 1819.774667    | 910.390971       | 1818.790651    | 909.898963       | L    | 577.319168  | 289.163222      | 560.292619     | 280.649948       | 559.308603     | 280.157940       | 5  |
| 14 | 1937.848895 | 969.428085      | 1920.822346    | 960.914811       | 1919.838330    | 960.422803       | T    | 464.235104  | 232.621190      | 447.208555     | 224.107916       | 446.224539     | 223.615908       | 4  |
| 15 | 2024.880923 | 1012.944100     | 2007.854374    | 1004.430825      | 2006.870358    | 1003.938817      | S    | 363.187425  | 182.097351      | 346.160876     | 173.584076       | 345.176860     | 173.092068       | 3  |
| 16 | 2153.923516 | 1077.465396     | 2136.896967    | 1068.952121      | 2135.912951    | 1068.460113      | E    | 276.155397  | 138.581337      | 259.128848     | 130.068062       | 258.144832     | 129.576054       | 2  |
| 17 |             |                 |                |                  |                |                  | K    | 147.112804  | 74.060040       | 130.086255     | 65.546765        |                |                  | 1  |

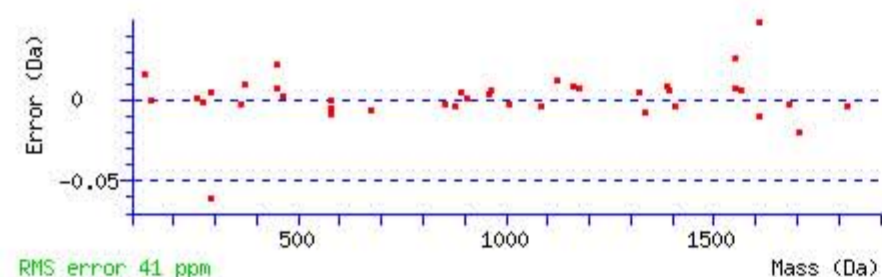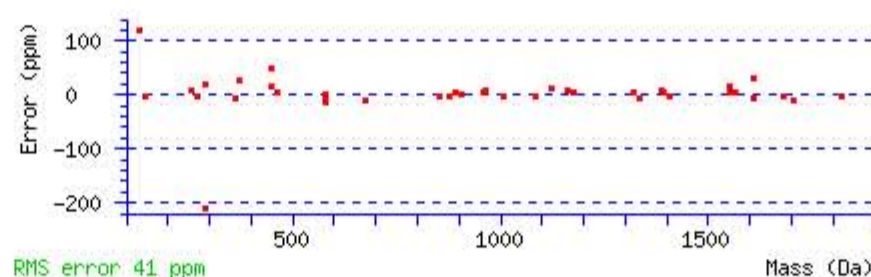

NCBI BLAST search of **QCVPHDQCACGVLTSK**

(Parameters: blastp, nr protein database, expect=20000, no filter, PAM30)

Other BLAST [web gateways](#)

## All matches to this query

| Score | Mr(calc):   | Delta     | Sequence                         |
|-------|-------------|-----------|----------------------------------|
| 47.5  | 2299.021790 | -0.005048 | <a href="#">QCVPHDQCACGVLTSK</a> |
| 24.6  | 2299.021790 | -0.005048 | <a href="#">QCVPHDQCACGVLTSK</a> |

# MASCOT Search Results

## Peptide View

MS/MS Fragmentation of **TDGCQHFCLPGQESYTCSCAQGYR**  
 Found in **PROZ\_HUMAN**, Vitamin K-dependent protein Z OS=Homo sapiens GN=PROZ PE=1 SV=2

Match to Query 55417: 3192.305616 from(799.083680,4+) rtinseconds(2067) index(46433)  
 Title: Locus:1.1.1.3432.12 File:"2013-07-02 CLN FXIII 180 min 3rd F 4.wiff"  
 Data file C:\Program Files (x86)\Matrix Science\Mascot Daemon\mgf9 FXIII 180 min 3rd\mascot\_daemon\_merge.mgf

Click mouse within plot area to zoom in by factor of two about that point  
 Or, Plot from  to  Da   
 Label all possible matches  Label matches used for scoring

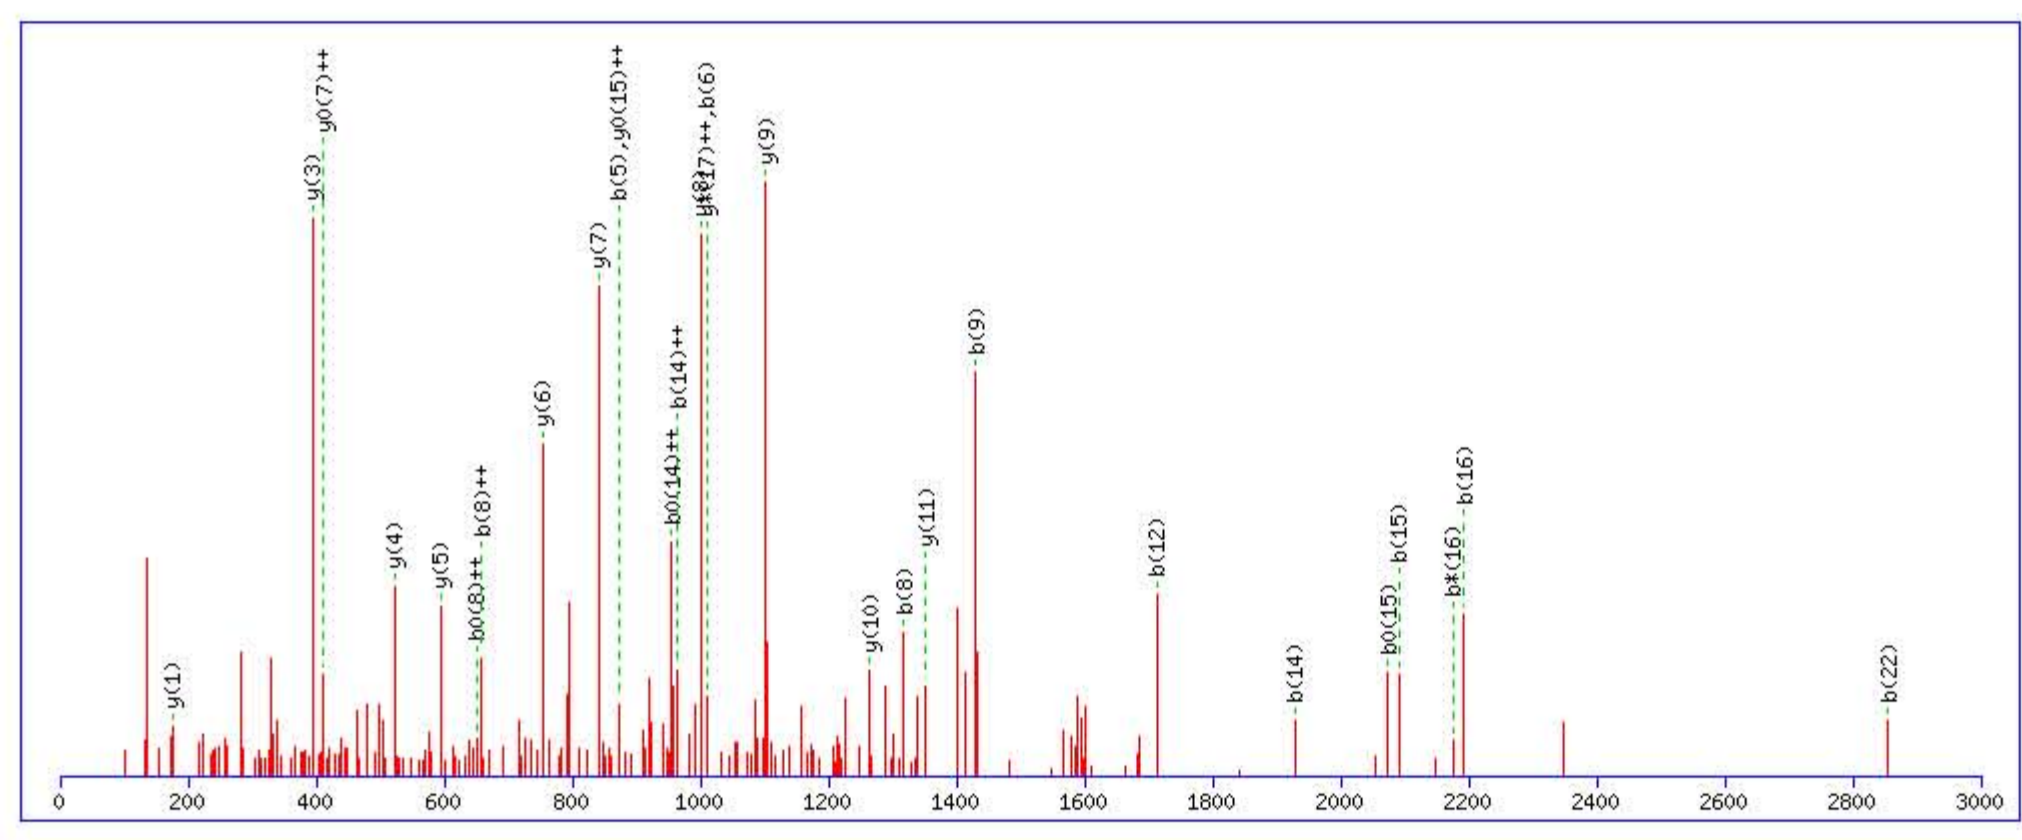

Monoisotopic mass of neutral peptide Mr(calc): 3192.298050  
 Fixed modifications: Carbamidomethyl (C) (apply to specified residues or termini only)  
 Variable modifications:  
 Q5 : Biotin:Thermo-21345 (Q)  
 Ions Score: 74 Expect: 4.7e-008  
 Matches : 28/256 fragment ions using 42 most intense peaks [\(help\)](#)

| #  | b                  | b <sup>++</sup>   | b <sup>+</sup>     | b <sup>+++</sup> | b <sup>0</sup>     | b <sup>0++</sup>  | Seq. | y                  | y <sup>++</sup> | y <sup>+</sup> | y <sup>+++</sup>   | y <sup>0</sup> | y <sup>0++</sup>  | #  |
|----|--------------------|-------------------|--------------------|------------------|--------------------|-------------------|------|--------------------|-----------------|----------------|--------------------|----------------|-------------------|----|
| 1  | 102.054955         | 51.531116         |                    |                  | 84.044390          | 42.525833         | T    |                    |                 |                |                    |                |                   | 24 |
| 2  | 217.081898         | 109.044587        |                    |                  | 199.071333         | 100.039304        | D    | 3092.257619        | 1546.632447     | 3075.231070    | 1538.119173        | 3074.247054    | 1537.627165       | 23 |
| 3  | 274.103362         | 137.555319        |                    |                  | 256.092797         | 128.550037        | G    | 2977.230676        | 1489.118976     | 2960.204127    | 1480.605701        | 2959.220111    | 1480.113693       | 22 |
| 4  | 434.134011         | 217.570644        |                    |                  | 416.123446         | 208.565361        | C    | 2920.209212        | 1460.608244     | 2903.182663    | 1452.094969        | 2902.198647    | 1451.602961       | 21 |
| 5  | <b>873.359337</b>  | 437.183307        | 856.332788         | 428.670032       | 855.348772         | 428.178024        | Q    | 2760.178563        | 1380.592919     | 2743.152014    | 1372.079645        | 2742.167998    | 1371.587637       | 20 |
| 6  | <b>1010.418249</b> | 505.712763        | 993.391700         | 497.199488       | 992.407684         | 496.707480        | H    | 2320.953237        | 1160.980256     | 2303.926688    | 1152.466982        | 2302.942672    | 1151.974974       | 19 |
| 7  | 1157.486663        | 579.246970        | 1140.460114        | 570.733695       | 1139.476098        | 570.241687        | F    | 2183.894325        | 1092.450800     | 2166.867776    | 1083.937526        | 2165.883760    | 1083.445518       | 18 |
| 8  | <b>1317.517312</b> | <b>659.262294</b> | 1300.490763        | 650.749020       | 1299.506747        | <b>650.257012</b> | C    | 2036.825911        | 1018.916594     | 2019.799362    | <b>1010.403319</b> | 2018.815346    | 1009.911311       | 17 |
| 9  | <b>1430.601376</b> | 715.804326        | 1413.574827        | 707.291052       | 1412.590811        | 706.799044        | L    | 1876.795262        | 938.901269      | 1859.768713    | 930.387994         | 1858.784697    | 929.895986        | 16 |
| 10 | 1527.654140        | 764.330708        | 1510.627591        | 755.817434       | 1509.643575        | 755.325426        | P    | 1763.711198        | 882.359237      | 1746.684649    | 873.845963         | 1745.700633    | <b>873.353954</b> | 15 |
| 11 | 1584.675604        | 792.841440        | 1567.649055        | 784.328166       | 1566.665039        | 783.836158        | G    | 1666.658434        | 833.832855      | 1649.631885    | 825.319581         | 1648.647869    | 824.827572        | 14 |
| 12 | <b>1712.734182</b> | 856.870729        | 1695.707633        | 848.357455       | 1694.723617        | 847.865446        | Q    | 1609.636970        | 805.322123      | 1592.610421    | 796.808849         | 1591.626405    | 796.316841        | 13 |
| 13 | 1841.776775        | 921.392026        | 1824.750226        | 912.878751       | 1823.766210        | 912.386743        | E    | 1481.578392        | 741.292834      | 1464.551843    | 732.779560         | 1463.567827    | 732.287552        | 12 |
| 14 | <b>1928.808803</b> | <b>964.908040</b> | 1911.782254        | 956.394765       | 1910.798238        | <b>955.902757</b> | S    | <b>1352.535799</b> | 676.771538      | 1335.509250    | 668.258263         | 1334.525234    | 667.766255        | 11 |
| 15 | <b>2091.872132</b> | 1046.439704       | 2074.845583        | 1037.926429      | <b>2073.861567</b> | 1037.434421       | Y    | <b>1265.503771</b> | 633.255523      | 1248.477222    | 624.742249         | 1247.493206    | 624.250241        | 10 |
| 16 | <b>2192.919811</b> | 1096.963543       | <b>2175.893262</b> | 1088.450269      | 2174.909246        | 1087.958261       | T    | <b>1102.440442</b> | 551.723859      | 1085.413893    | 543.210584         | 1084.429877    | 542.718576        | 9  |
| 17 | 2352.950460        | 1176.978868       | 2335.923911        | 1168.465593      | 2334.939895        | 1167.973585       | C    | <b>1001.392763</b> | 501.200020      | 984.366214     | 492.686745         | 983.382198     | 492.194737        | 8  |
| 18 | 2439.982488        | 1220.494882       | 2422.955939        | 1211.981607      | 2421.971923        | 1211.489599       | S    | <b>841.362114</b>  | 421.184695      | 824.335565     | 412.671421         | 823.351549     | <b>412.179413</b> | 7  |
| 19 | 2600.013137        | 1300.510206       | 2582.986588        | 1291.996932      | 2582.002572        | 1291.504924       | C    | <b>754.330086</b>  | 377.668681      | 737.303537     | 369.155407         |                |                   | 6  |
| 20 | 2671.050251        | 1336.028763       | 2654.023702        | 1327.515489      | 2653.039686        | 1327.023481       | A    | <b>594.299437</b>  | 297.653357      | 577.272888     | 289.140082         |                |                   | 5  |
| 21 | 2799.108829        | 1400.058052       | 2782.082280        | 1391.544778      | 2781.098264        | 1391.052770       | Q    | <b>523.262323</b>  | 262.134800      | 506.235774     | 253.621525         |                |                   | 4  |
| 22 | <b>2856.130293</b> | 1428.568784       | 2839.103744        | 1420.055510      | 2838.119728        | 1419.563502       | G    | <b>395.203745</b>  | 198.105510      | 378.177196     | 189.592236         |                |                   | 3  |
| 23 | 3019.193622        | 1510.100449       | 3002.167073        | 1501.587174      | 3001.183057        | 1501.095166       | Y    | 338.182281         | 169.594778      | 321.155732     | 161.081504         |                |                   | 2  |
| 24 |                    |                   |                    |                  |                    |                   | R    | <b>175.118952</b>  | 88.063114       | 158.092403     | 79.549839          |                |                   | 1  |

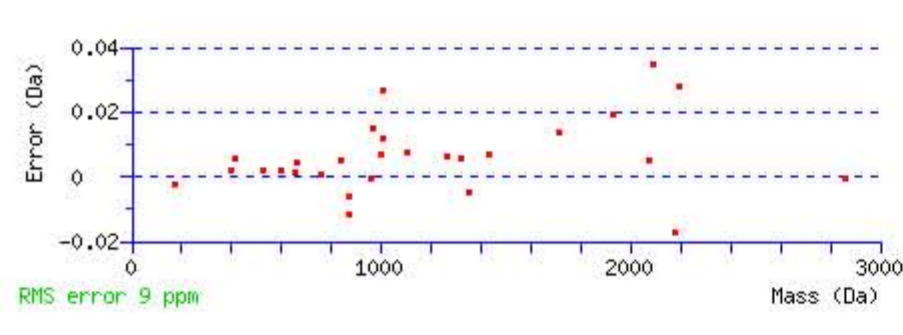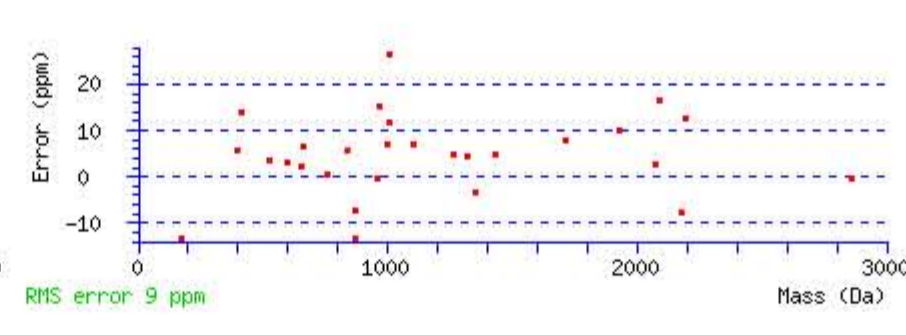

NCBI BLAST search of **TDGCQHFCLPGQESYTCSCAQGYR**  
 (Parameters: blastp, nr protein database, expect=20000, no filter, PAM30)  
 Other BLAST [web gateways](#)

### All matches to this query

| Score | Mr(calc):   | Delta    | Sequence                                 |
|-------|-------------|----------|------------------------------------------|
| 73.9  | 3192.298050 | 0.007566 | <a href="#">TDGCQHFCLPGQESYTCSCAQGYR</a> |
| 41.5  | 3192.298050 | 0.007566 | <a href="#">TDGCQHFCLPGQESYTCSCAQGYR</a> |

# MASCOT SEARCH RESULTS

## Peptide View

MS/MS Fragmentation of **QPQFISR**

Found in **VTNC\_HUMAN**, Vitronectin OS=Homo sapiens GN=VTN PE=1 SV=1

Match to Query 17437: 1185.630748 from(593.822650,2+) rtinseconds(1796) index(44727)

Title: Locus:1.1.1.3338.10 File:"2013-07-02 CLN FXIII 180 min 3rd F 4.wiff"

Data file C:\Program Files (x86)\Matrix Science\Mascot Daemon\mgf\9 FXIII 180 min 3rd\mascot\_daemon\_merge.mgf

Click mouse within plot area to zoom in by factor of two about that point

Or, Plot from  to  Da

Label all possible matches  Label matches used for scoring

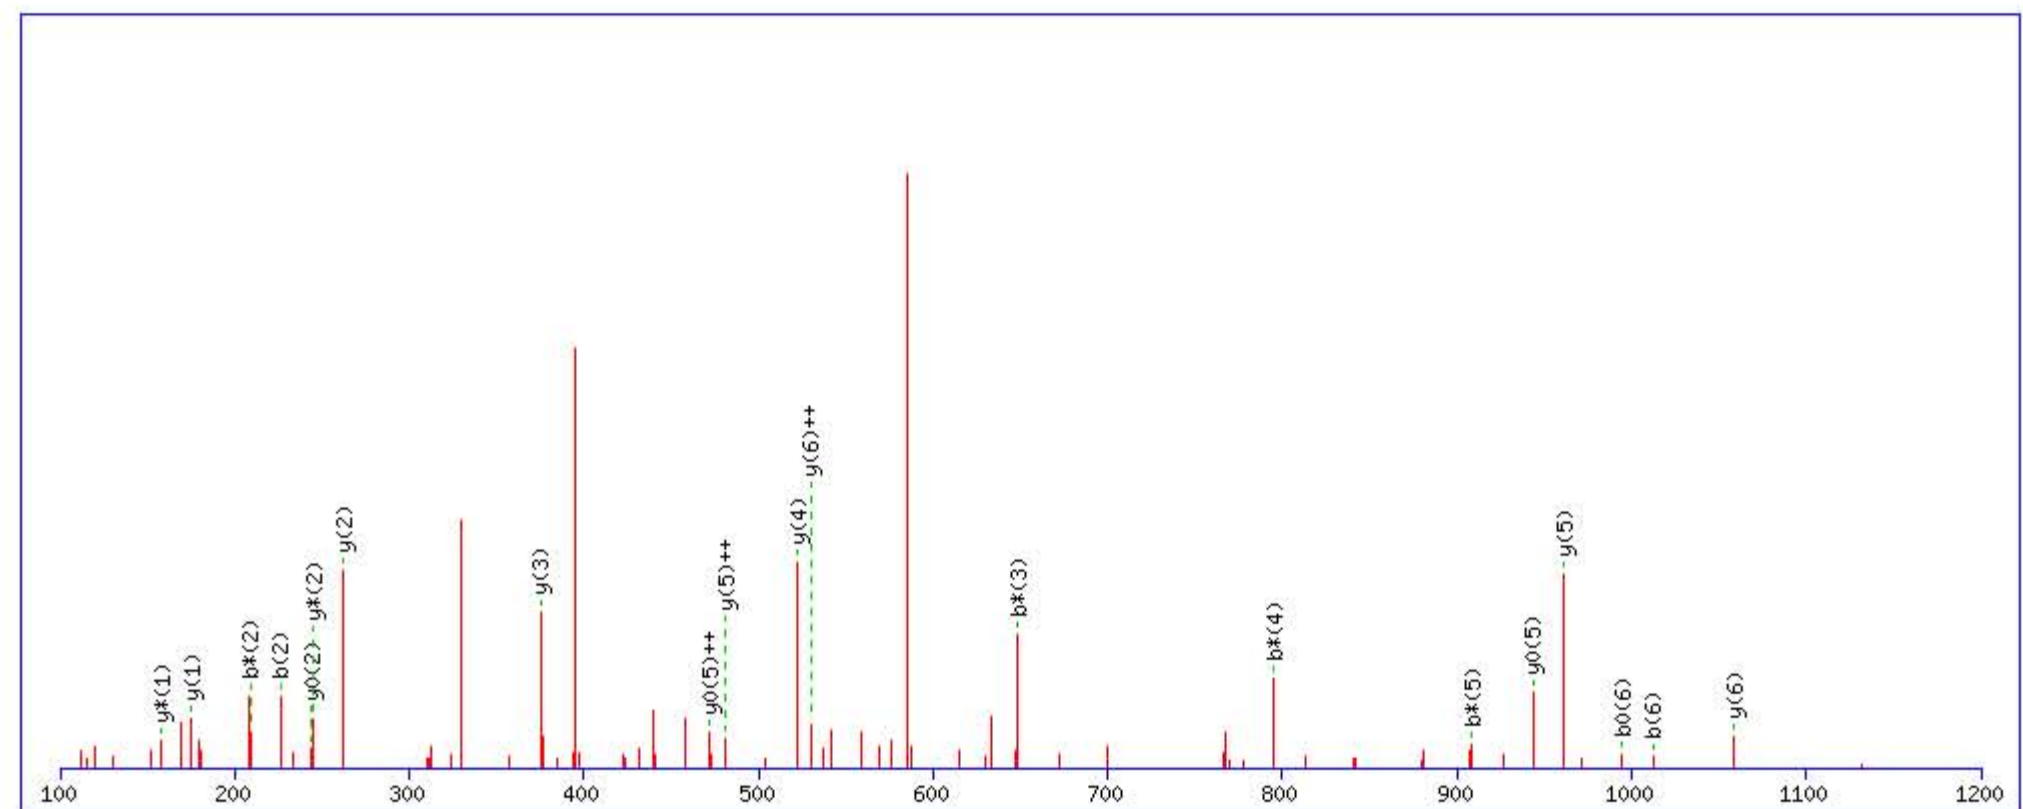

Monoisotopic mass of neutral peptide Mr(calc): 1185.632843

Fixed modifications: Carbamidomethyl (C) (apply to specified residues or termini only)

Variable modifications:

Q3 : Biotin:Thermo-21345 (Q)

Ions Score: 26 Expect: 0.063

Matches : 20/60 fragment ions using 48 most intense peaks [\(help\)](#)

| # | b                  | b <sup>++</sup> | b <sup>*</sup>    | b <sup>*++</sup> | b <sup>0</sup>    | b <sup>0++</sup> | Seq. | y                  | y <sup>++</sup>   | y <sup>*</sup>    | y <sup>*++</sup> | y <sup>0</sup>    | y <sup>0++</sup>  | # |
|---|--------------------|-----------------|-------------------|------------------|-------------------|------------------|------|--------------------|-------------------|-------------------|------------------|-------------------|-------------------|---|
| 1 | 129.065854         | 65.036565       | 112.039305        | 56.523291        |                   |                  | Q    |                    |                   |                   |                  |                   |                   | 7 |
| 2 | <b>226.118618</b>  | 113.562947      | <b>209.092069</b> | 105.049673       |                   |                  | P    | <b>1058.581548</b> | <b>529.794412</b> | 1041.554999       | 521.281138       | 1040.570983       | 520.789129        | 6 |
| 3 | 665.343944         | 333.175610      | <b>648.317395</b> | 324.662336       |                   |                  | Q    | <b>961.528784</b>  | <b>481.268030</b> | 944.502235        | 472.754755       | <b>943.518219</b> | <b>472.262747</b> | 5 |
| 4 | 812.412358         | 406.709817      | <b>795.385809</b> | 398.196543       |                   |                  | F    | <b>522.303458</b>  | 261.655367        | 505.276909        | 253.142092       | 504.292893        | 252.650084        | 4 |
| 5 | 925.496422         | 463.251849      | <b>908.469873</b> | 454.738575       |                   |                  | I    | <b>375.235044</b>  | 188.121160        | 358.208495        | 179.607885       | 357.224479        | 179.115877        | 3 |
| 6 | <b>1012.528450</b> | 506.767863      | 995.501901        | 498.254589       | <b>994.517885</b> | 497.762581       | S    | <b>262.150980</b>  | 131.579128        | <b>245.124431</b> | 123.065853       | <b>244.140415</b> | 122.573845        | 2 |
| 7 |                    |                 |                   |                  |                   |                  | R    | <b>175.118952</b>  | 88.063114         | <b>158.092403</b> | 79.549839        |                   |                   | 1 |

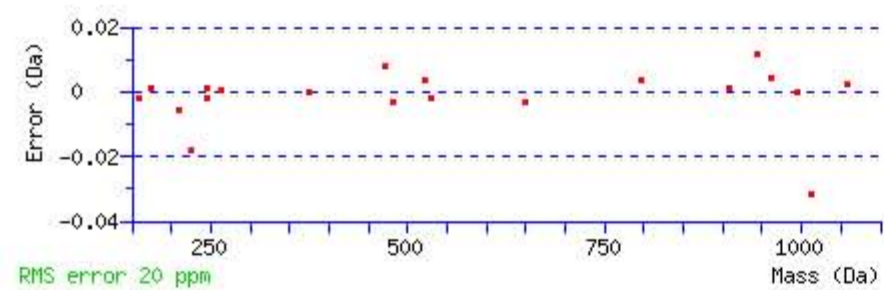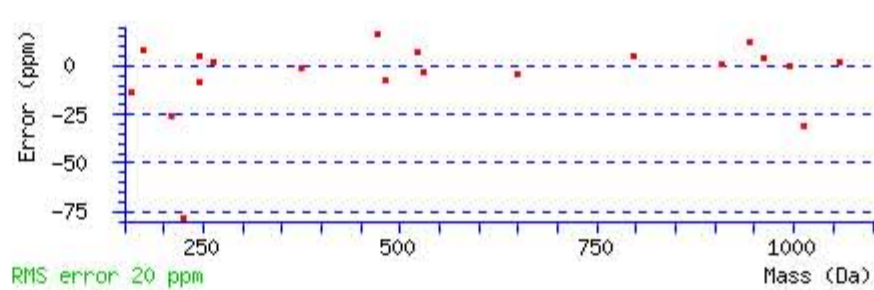

NCBI BLAST search of **QPQFISR**

(Parameters: blastp, nr protein database, expect=20000, no filter, PAM30)

Other BLAST [web gateways](#)

All matches to this query

| Score | Mr(calc):   | Delta     | Sequence                     |
|-------|-------------|-----------|------------------------------|
| 26.2  | 1185.632843 | -0.002095 | <a href="#">QPQFISR</a>      |
| 17.1  | 1185.646561 | -0.015813 | <a href="#">KPIDSLRDSR</a>   |
| 13.4  | 1185.632843 | -0.002095 | <a href="#">QPQFISR</a>      |
| 8.1   | 1185.635330 | -0.004582 | <a href="#">ENLDSVIQIR</a>   |
| 6.2   | 1185.617569 | 0.013179  | <a href="#">NIGALPVMAR</a>   |
| 5.8   | 1185.636200 | -0.005452 | <a href="#">QIAAVMSR</a>     |
| 5.7   | 1185.646561 | -0.015813 | <a href="#">KASSTPSPKQR</a>  |
| 5.0   | 1185.646561 | -0.015813 | <a href="#">APSAKKPSTGSR</a> |
| 4.0   | 1185.628799 | 0.001949  | <a href="#">SGKMAPKPQSR</a>  |
| 2.7   | 1185.617584 | 0.013164  | <a href="#">QVSSAEVR</a>     |

# MASCOT SCIENCE Mascot Search Results

## Peptide View

MS/MS Fragmentation of **GQYCYELDEK**

Found in **VTNC\_HUMAN**, Vitronectin OS=Homo sapiens GN=VTN PE=1 SV=1

Match to Query 31100: 1614.708108 from(808.361330,2+) rtinseconds(1914) index(45346)

Title: Locus:1.1.1.3379.17 File:"2013-07-02 CLN FXIII 180 min 3rd F 4.wiff"

Data file C:\Program Files (x86)\Matrix Science\Mascot Daemon\mgf9 FXIII 180 min 3rd\mascot\_daemon\_merge.mgf

Click mouse within plot area to zoom in by factor of two about that point

Or, Plot from  to  Da

Label all possible matches  Label matches used for scoring

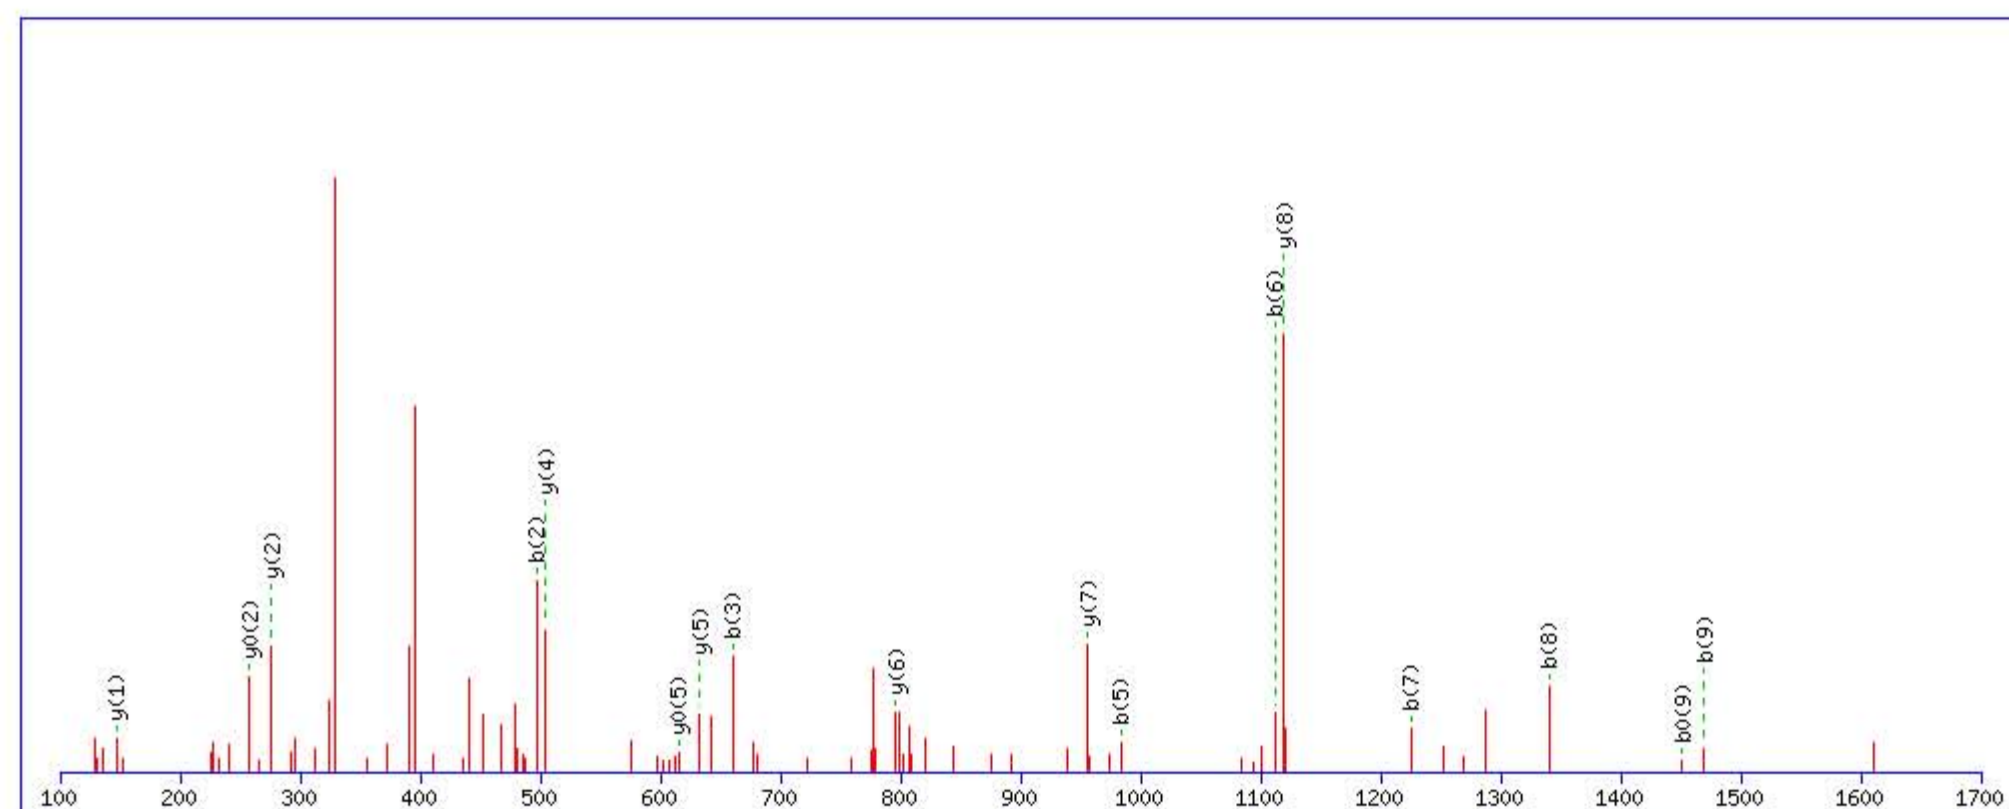

Monoisotopic mass of neutral peptide Mr(calc): 1614.705795

Fixed modifications: Carbamidomethyl (C) (apply to specified residues or termini only)

Variable modifications:

Q2 : Biotin:Thermo-21345 (Q)

Ions Score: 47 Expect: 8.4e-005

Matches : 17/94 fragment ions using 27 most intense peaks ([help](#))

| #  | b                  | b <sup>++</sup> | b <sup>*</sup> | b <sup>*++</sup> | b <sup>0</sup>     | b <sup>0++</sup> | Seq. | y                  | y <sup>++</sup> | y <sup>*</sup> | y <sup>*++</sup> | y <sup>0</sup>    | y <sup>0++</sup> | #  |
|----|--------------------|-----------------|----------------|------------------|--------------------|------------------|------|--------------------|-----------------|----------------|------------------|-------------------|------------------|----|
| 1  | 58.028740          | 29.518008       |                |                  |                    |                  | G    |                    |                 |                |                  |                   |                  | 10 |
| 2  | <b>497.254066</b>  | 249.130671      | 480.227517     | 240.617397       |                    |                  | Q    | 1558.691630        | 779.849453      | 1541.665081    | 771.336179       | 1540.681065       | 770.844171       | 9  |
| 3  | <b>660.317395</b>  | 330.662336      | 643.290846     | 322.149061       |                    |                  | Y    | <b>1119.466304</b> | 560.236790      | 1102.439755    | 551.723516       | 1101.455739       | 551.231508       | 8  |
| 4  | 820.348044         | 410.677660      | 803.321495     | 402.164386       |                    |                  | C    | <b>956.402975</b>  | 478.705126      | 939.376426     | 470.191851       | 938.392410        | 469.699843       | 7  |
| 5  | <b>983.411373</b>  | 492.209325      | 966.384824     | 483.696050       |                    |                  | Y    | <b>796.372326</b>  | 398.689801      | 779.345777     | 390.176527       | 778.361761        | 389.684519       | 6  |
| 6  | <b>1112.453966</b> | 556.730621      | 1095.427417    | 548.217347       | 1094.443401        | 547.725339       | E    | <b>633.308997</b>  | 317.158137      | 616.282448     | 308.644862       | <b>615.298432</b> | 308.152854       | 5  |
| 7  | <b>1225.538030</b> | 613.272653      | 1208.511481    | 604.759379       | 1207.527465        | 604.267371       | L    | <b>504.266404</b>  | 252.636840      | 487.239855     | 244.123566       | 486.255839        | 243.631558       | 4  |
| 8  | <b>1340.564973</b> | 670.786125      | 1323.538424    | 662.272850       | 1322.554408        | 661.780842       | D    | 391.182340         | 196.094808      | 374.155791     | 187.581534       | 373.171775        | 187.089526       | 3  |
| 9  | <b>1469.607566</b> | 735.307421      | 1452.581017    | 726.794147       | <b>1451.597001</b> | 726.302139       | E    | <b>276.155397</b>  | 138.581337      | 259.128848     | 130.068062       | <b>258.144832</b> | 129.576054       | 2  |
| 10 |                    |                 |                |                  |                    |                  | K    | <b>147.112804</b>  | 74.060040       | 130.086255     | 65.546765        |                   |                  | 1  |

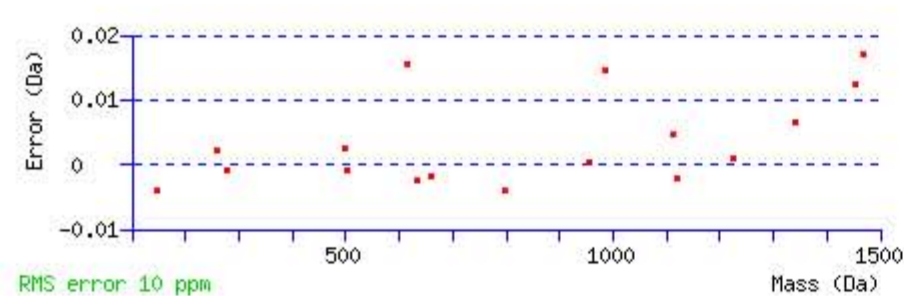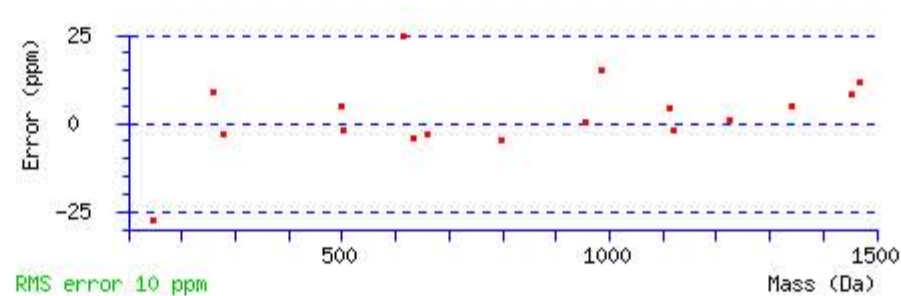

NCBI BLAST search of **GQYCYELDEK**

(Parameters: blastp, nr protein database, expect=20000, no filter, PAM30)

Other BLAST [web gateways](#)

All matches to this query

| Score | Mr(calc):   | Delta     | Sequence                       |
|-------|-------------|-----------|--------------------------------|
| 46.8  | 1614.705795 | 0.002313  | <a href="#">GQYCYELDEK</a>     |
| 6.1   | 1614.717010 | -0.008902 | <a href="#">EYFRMELMHAEK</a>   |
| 1.6   | 1614.692566 | 0.015542  | <a href="#">QFFDCGHWDYDLK</a>  |
| 0.3   | 1614.701767 | 0.006341  | <a href="#">KAEQLMSDENCYFK</a> |

# MASCOT SEARCH RESULTS

## Peptide View

MS/MS Fragmentation of **DWHGVPGQVDAAMAGR**

Found in **VTNC\_HUMAN**, Vitronectin OS=Homo sapiens GN=VTN PE=1 SV=1

Match to Query 38902: 1976.933772 from(659.985200,3+) rtinseconds(2178) index(32912)

Title: Locus:1.1.1.3422.10 File:"2013-07-02 CLN FXIII 180 min 3rd F 3.wiff"

Data file C:\Program Files (x86)\Matrix Science\Mascot Daemon\mgf\9 FXIII 180 min 3rd\mascot\_daemon\_merge.mgf

Click mouse within plot area to zoom in by factor of two about that point

Or, Plot from  to  Da

Label all possible matches  Label matches used for scoring

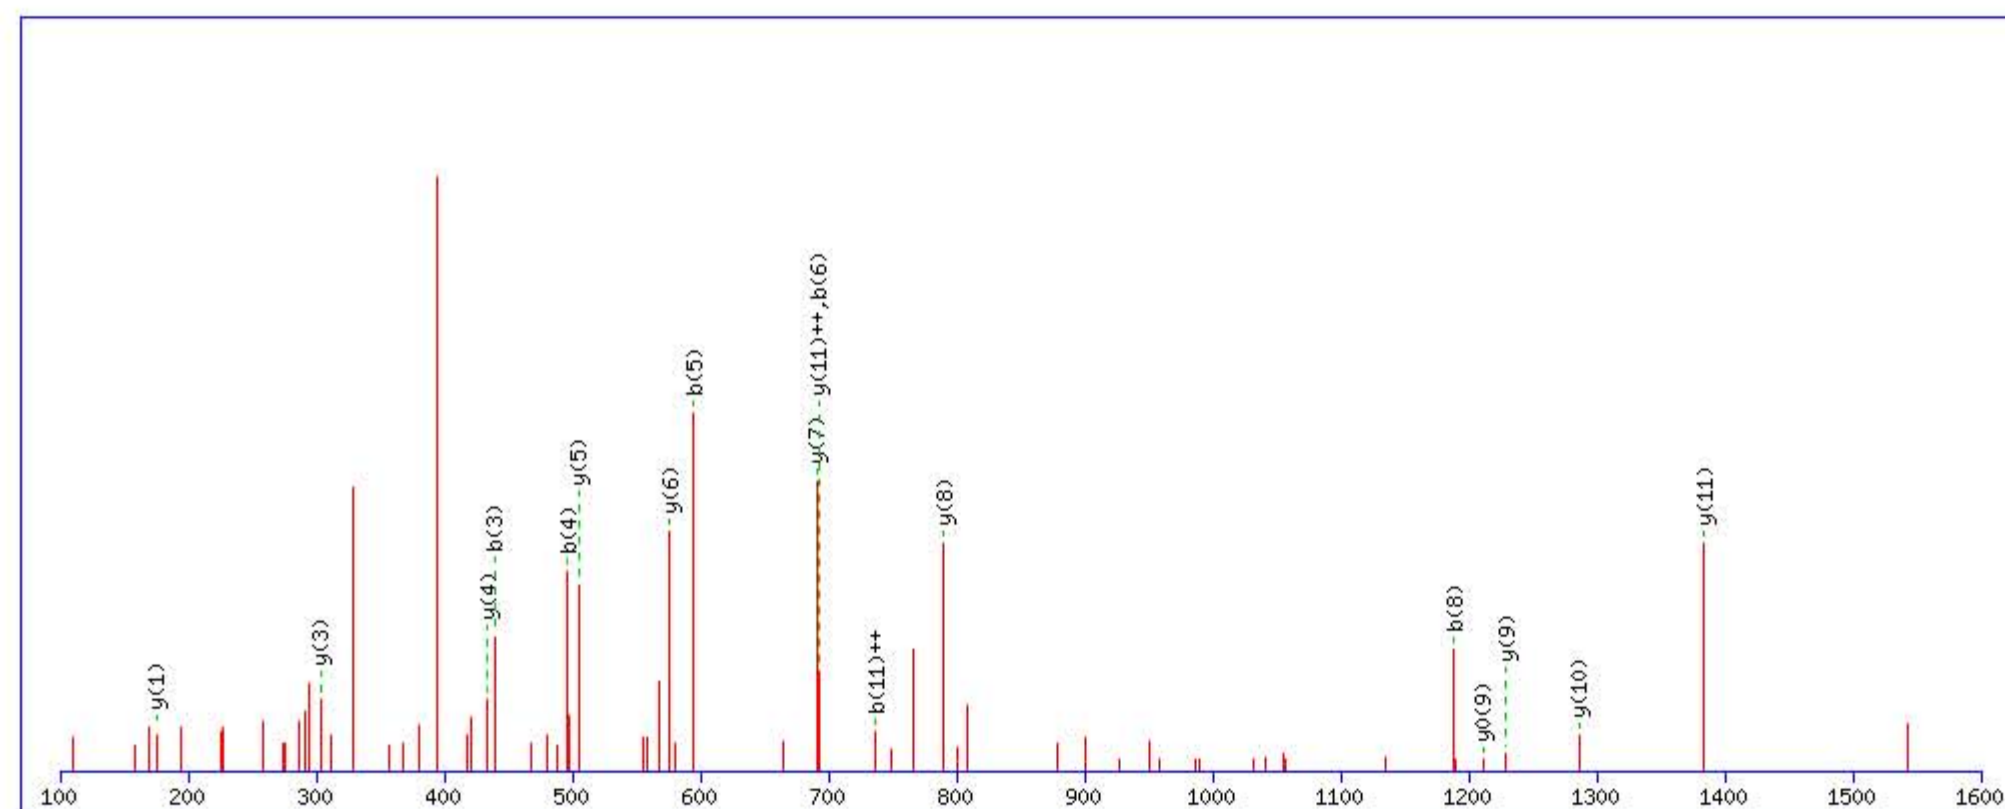

Monoisotopic mass of neutral peptide Mr(calc): 1976.934937

Fixed modifications: Carbamidomethyl (C) (apply to specified residues or termini only)

Variable modifications:

Q8 : Biotin:Thermo-21345 (Q)

Ions Score: 43 Expect: 0.00051

Matches : 18/154 fragment ions using 45 most intense peaks [\(help\)](#)

| #  | b                  | b <sup>++</sup>   | b <sup>*</sup> | b <sup>*++</sup> | b <sup>0</sup> | b <sup>0++</sup> | Seq. | y                  | y <sup>++</sup>   | y <sup>*</sup> | y <sup>*++</sup> | y <sup>0</sup>     | y <sup>0++</sup> | #  |
|----|--------------------|-------------------|----------------|------------------|----------------|------------------|------|--------------------|-------------------|----------------|------------------|--------------------|------------------|----|
| 1  | 116.034219         | 58.520748         |                |                  | 98.023654      | 49.515465        | D    |                    |                   |                |                  |                    |                  | 16 |
| 2  | 302.113532         | 151.560404        |                |                  | 284.102967     | 142.555122       | W    | 1862.915257        | 931.961266        | 1845.888708    | 923.447992       | 1844.904692        | 922.955984       | 15 |
| 3  | <b>439.172444</b>  | 220.089860        |                |                  | 421.161879     | 211.084577       | H    | 1676.835944        | 838.921610        | 1659.809395    | 830.408336       | 1658.825379        | 829.916327       | 14 |
| 4  | <b>496.193908</b>  | 248.600592        |                |                  | 478.183343     | 239.595309       | G    | 1539.777032        | 770.392154        | 1522.750483    | 761.878880       | 1521.766467        | 761.386871       | 13 |
| 5  | <b>595.262322</b>  | 298.134799        |                |                  | 577.251757     | 289.129517       | V    | 1482.755568        | 741.881422        | 1465.729019    | 733.368148       | 1464.745003        | 732.876140       | 12 |
| 6  | <b>692.315086</b>  | 346.661181        |                |                  | 674.304521     | 337.655899       | P    | <b>1383.687154</b> | <b>692.347215</b> | 1366.660605    | 683.833941       | 1365.676589        | 683.341932       | 11 |
| 7  | 749.336550         | 375.171913        |                |                  | 731.325985     | 366.166631       | G    | <b>1286.634390</b> | 643.820833        | 1269.607841    | 635.307559       | 1268.623825        | 634.815550       | 10 |
| 8  | <b>1188.561876</b> | 594.784576        | 1171.535327    | 586.271302       | 1170.551311    | 585.779293       | Q    | <b>1229.612926</b> | 615.310101        | 1212.586377    | 606.796827       | <b>1211.602361</b> | 606.304819       | 9  |
| 9  | 1287.630290        | 644.318783        | 1270.603741    | 635.805509       | 1269.619725    | 635.313501       | V    | <b>790.387600</b>  | 395.697438        | 773.361051     | 387.184164       | 772.377035         | 386.692156       | 8  |
| 10 | 1402.657233        | 701.832255        | 1385.630684    | 693.318980       | 1384.646668    | 692.826972       | D    | <b>691.319186</b>  | 346.163231        | 674.292637     | 337.649956       | 673.308621         | 337.157948       | 7  |
| 11 | 1473.694347        | <b>737.350812</b> | 1456.667798    | 728.837537       | 1455.683782    | 728.345529       | A    | <b>576.292243</b>  | 288.649759        | 559.265694     | 280.136485       |                    |                  | 6  |
| 12 | 1544.731461        | 772.869369        | 1527.704912    | 764.356094       | 1526.720896    | 763.864086       | A    | <b>505.255129</b>  | 253.131202        | 488.228580     | 244.617928       |                    |                  | 5  |
| 13 | 1675.771946        | 838.389611        | 1658.745397    | 829.876337       | 1657.761381    | 829.384329       | M    | <b>434.218015</b>  | 217.612645        | 417.191466     | 209.099371       |                    |                  | 4  |
| 14 | 1746.809060        | 873.908168        | 1729.782511    | 865.394894       | 1728.798495    | 864.902886       | A    | <b>303.177530</b>  | 152.092403        | 286.150981     | 143.579128       |                    |                  | 3  |
| 15 | 1803.830524        | 902.418900        | 1786.803975    | 893.905626       | 1785.819959    | 893.413617       | G    | 232.140416         | 116.573846        | 215.113867     | 108.060571       |                    |                  | 2  |
| 16 |                    |                   |                |                  |                |                  | R    | <b>175.118952</b>  | 88.063114         | 158.092403     | 79.549839        |                    |                  | 1  |

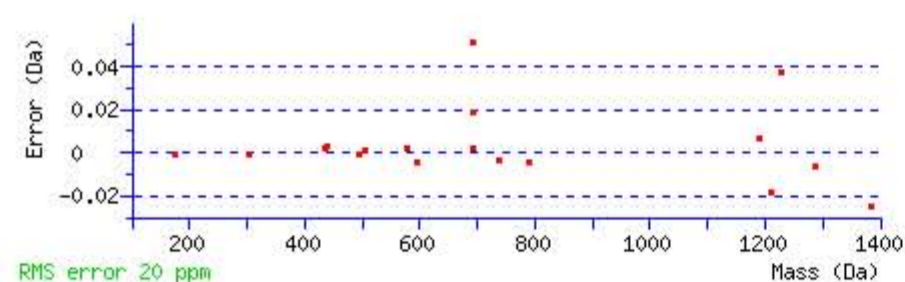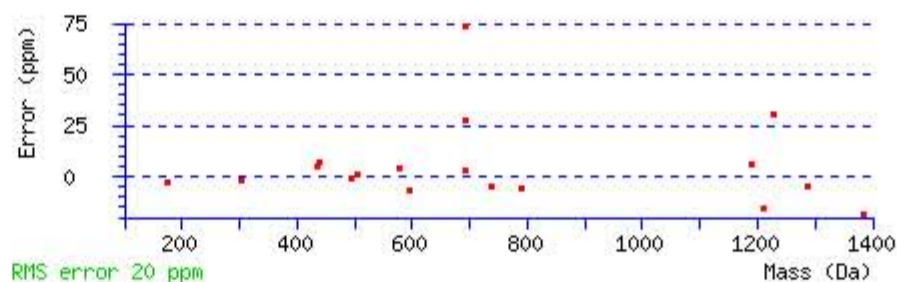

NCBI BLAST search of [DWHGVPGQVDAAMAGR](#)

(Parameters: blastp, nr protein database, expect=20000, no filter, PAM30)

Other BLAST [web gateways](#)

All matches to this query

| Score | Mr(calc):   | Delta     | Sequence                          |
|-------|-------------|-----------|-----------------------------------|
| 42.9  | 1976.934937 | -0.001165 | <a href="#">DWHGVPGQVDAAMAGR</a>  |
| 7.8   | 1976.918793 | 0.014979  | <a href="#">DDGLQYRPDVKDASDQR</a> |

Mascot: <http://www.matrixscience.com/>

# MASCOT Search Results

## Peptide View

MS/MS Fragmentation of **CQCDELCSYYQSCCTDYTAECKPQVTR**  
 Found in **VTNC\_HUMAN**, Vitronectin OS=Homo sapiens GN=VTN PE=1 SV=1

Match to Query 61264: 3792.513656 from(949.135690,4+) rtinseconds(1967) index(45788)  
 Title: Locus:1.1.1.3397.24 File:"2013-07-02 CLN FXIII 180 min 3rd F 4.wiff"  
 Data file C:\Program Files (x86)\Matrix Science\Mascot Daemon\mgf9 FXIII 180 min 3rd\mascot\_daemon\_merge.mgf

Click mouse within plot area to zoom in by factor of two about that point  
 Or, Plot from  to  Da   
 Label all possible matches  Label matches used for scoring

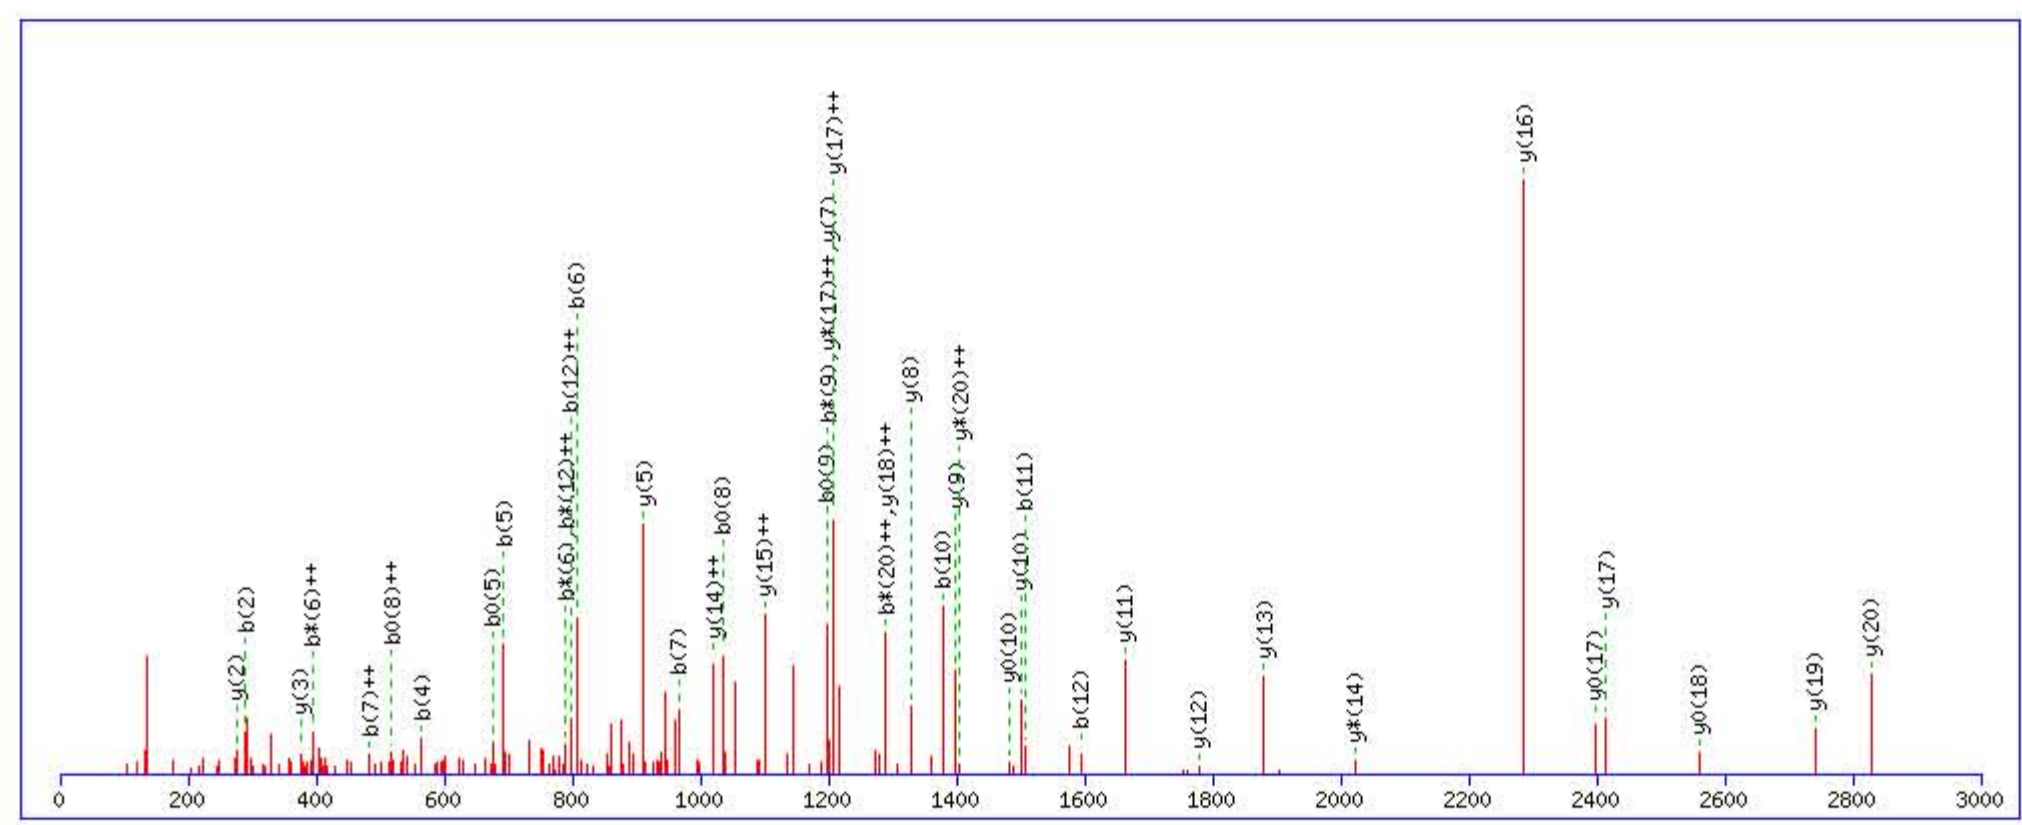

Monoisotopic mass of neutral peptide Mr(calc): 3792.511536  
 Fixed modifications: Carbamidomethyl (C) (apply to specified residues or termini only)  
 Variable modifications:  
 Q24 : Biotin:Thermo-21345 (Q)  
 Ions Score: 86 Expect: 2.5e-009  
 Matches : 43/302 fragment ions using 58 most intense peaks [\(help\)](#)

| #  | b                  | b <sup>++</sup>   | b <sup>+</sup>     | b <sup>+++</sup>   | b <sup>0</sup>     | b <sup>0++</sup>  | Seq. | y                  | y <sup>++</sup>    | y <sup>*</sup>     | y <sup>+++</sup>   | y <sup>0</sup>     | y <sup>0++</sup> | #  |
|----|--------------------|-------------------|--------------------|--------------------|--------------------|-------------------|------|--------------------|--------------------|--------------------|--------------------|--------------------|------------------|----|
| 1  | 161.037925         | 81.022600         |                    |                    |                    |                   | C    |                    |                    |                    |                    |                    |                  | 27 |
| 2  | <b>289.096503</b>  | 145.051890        | 272.069954         | 136.538615         |                    |                   | Q    | 3633.488150        | 1817.247713        | 3616.461601        | 1808.734438        | 3615.477585        | 1808.242431      | 26 |
| 3  | 449.127152         | 225.067214        | 432.100603         | 216.553940         |                    |                   | C    | 3505.429572        | 1753.218424        | 3488.403023        | 1744.705149        | 3487.419007        | 1744.213141      | 25 |
| 4  | <b>564.154095</b>  | 282.580686        | 547.127546         | 274.067411         | 546.143530         | 273.575403        | D    | 3345.398923        | 1673.203099        | 3328.372374        | 1664.689825        | 3327.388358        | 1664.197817      | 24 |
| 5  | <b>693.196688</b>  | 347.101982        | 676.170139         | 338.588708         | <b>675.186123</b>  | 338.096700        | E    | 3230.371980        | 1615.689628        | 3213.345431        | 1607.176353        | 3212.361415        | 1606.684345      | 23 |
| 6  | <b>806.280752</b>  | 403.644014        | <b>789.254203</b>  | <b>395.130740</b>  | 788.270187         | 394.638732        | L    | 3101.329387        | 1551.168331        | 3084.302838        | 1542.655057        | 3083.318822        | 1542.163049      | 22 |
| 7  | <b>966.311401</b>  | <b>483.659339</b> | 949.284852         | 475.146064         | 948.300836         | 474.654056        | C    | 2988.245323        | 1494.626299        | 2971.218774        | 1486.113025        | 2970.234758        | 1485.621017      | 21 |
| 8  | 1053.343429        | 527.175353        | 1036.316880        | 518.662078         | <b>1035.332864</b> | <b>518.170070</b> | S    | <b>2828.214674</b> | 1414.610975        | 2811.188125        | <b>1406.097700</b> | 2810.204109        | 1405.605692      | 20 |
| 9  | 1216.406758        | 608.707017        | <b>1199.380209</b> | 600.193743         | <b>1198.396193</b> | 599.701735        | Y    | <b>2741.182646</b> | 1371.094961        | 2724.156097        | 1362.581686        | 2723.172081        | 1362.089678      | 19 |
| 10 | <b>1379.470087</b> | 690.238682        | 1362.443538        | 681.725407         | 1361.459522        | 681.233399        | Y    | 2578.119317        | <b>1289.563296</b> | 2561.092768        | 1281.050022        | <b>2560.108752</b> | 1280.558014      | 18 |
| 11 | <b>1507.528665</b> | 754.267971        | 1490.502116        | 745.754696         | 1489.518100        | 745.262688        | Q    | <b>2415.055988</b> | <b>1208.031632</b> | 2398.029439        | <b>1199.518357</b> | <b>2397.045423</b> | 1199.026349      | 17 |
| 12 | <b>1594.560693</b> | <b>797.783985</b> | 1577.534144        | <b>789.270710</b>  | 1576.550128        | 788.778702        | S    | <b>2286.997410</b> | 1144.002343        | 2269.970861        | 1135.489068        | 2268.986845        | 1134.997060      | 16 |
| 13 | 1754.591342        | 877.799309        | 1737.564793        | 869.286035         | 1736.580777        | 868.794027        | C    | 2199.965382        | <b>1100.486329</b> | 2182.938833        | 1091.973054        | 2181.954817        | 1091.481046      | 15 |
| 14 | 1914.621991        | 957.814634        | 1897.595442        | 949.301359         | 1896.611426        | 948.809351        | C    | 2039.934733        | <b>1020.471005</b> | <b>2022.908184</b> | 1011.957730        | 2021.924168        | 1011.465722      | 14 |
| 15 | 2015.669670        | 1008.338473       | 1998.643121        | 999.825199         | 1997.659105        | 999.333191        | T    | <b>1879.904084</b> | 940.455680         | 1862.877535        | 931.942406         | 1861.893519        | 931.450398       | 13 |
| 16 | 2130.696613        | 1065.851945       | 2113.670064        | 1057.338670        | 2112.686048        | 1056.846662       | D    | <b>1778.856405</b> | 889.931841         | 1761.829856        | 881.418566         | 1760.845840        | 880.926558       | 12 |
| 17 | 2293.759942        | 1147.383609       | 2276.733393        | 1138.870335        | 2275.749377        | 1138.378327       | Y    | <b>1663.829462</b> | 832.418369         | 1646.802913        | 823.905095         | 1645.818897        | 823.413086       | 11 |
| 18 | 2394.807621        | 1197.907449       | 2377.781072        | 1189.394174        | 2376.797056        | 1188.902166       | T    | <b>1500.766133</b> | 750.886704         | 1483.739584        | 742.373430         | <b>1482.755568</b> | 741.881422       | 10 |
| 19 | 2465.844735        | 1233.426006       | 2448.818186        | 1224.912731        | 2447.834170        | 1224.420723       | A    | <b>1399.718454</b> | 700.362865         | 1382.691905        | 691.849591         | 1381.707889        | 691.357583       | 9  |
| 20 | 2594.887328        | 1297.947302       | 2577.860779        | <b>1289.434028</b> | 2576.876763        | 1288.942020       | E    | <b>1328.681340</b> | 664.844308         | 1311.654791        | 656.331033         | 1310.670775        | 655.839025       | 8  |
| 21 | 2754.917977        | 1377.962627       | 2737.891428        | 1369.449352        | 2736.907412        | 1368.957344       | C    | <b>1199.638747</b> | 600.323011         | 1182.612198        | 591.809737         | 1181.628182        | 591.317729       | 7  |
| 22 | 2883.012940        | 1442.010108       | 2865.986391        | 1433.496834        | 2865.002375        | 1433.004826       | K    | 1039.608098        | 520.307687         | 1022.581549        | 511.794412         | 1021.597533        | 511.302404       | 6  |
| 23 | 2980.065704        | 1490.536490       | 2963.039155        | 1482.023216        | 2962.055139        | 1481.531208       | P    | <b>911.513135</b>  | 456.260205         | 894.486586         | 447.746931         | 893.502570         | 447.254923       | 5  |
| 24 | 3419.291030        | 1710.149153       | 3402.264481        | 1701.635879        | 3401.280465        | 1701.143871       | Q    | 814.460371         | 407.733823         | 797.433822         | 399.220549         | 796.449806         | 398.728541       | 4  |
| 25 | 3518.359444        | 1759.683360       | 3501.332895        | 1751.170086        | 3500.348879        | 1750.678078       | V    | <b>375.235045</b>  | 188.121160         | 358.208496         | 179.607886         | 357.224480         | 179.115878       | 3  |
| 26 | 3619.407123        | 1810.207200       | 3602.380574        | 1801.693925        | 3601.396558        | 1801.201917       | T    | <b>276.166631</b>  | 138.586953         | 259.140082         | 130.073679         | 258.156066         | 129.581671       | 2  |
| 27 |                    |                   |                    |                    |                    |                   | R    | 175.118952         | 88.063114          | 158.092403         | 79.549839          |                    |                  | 1  |

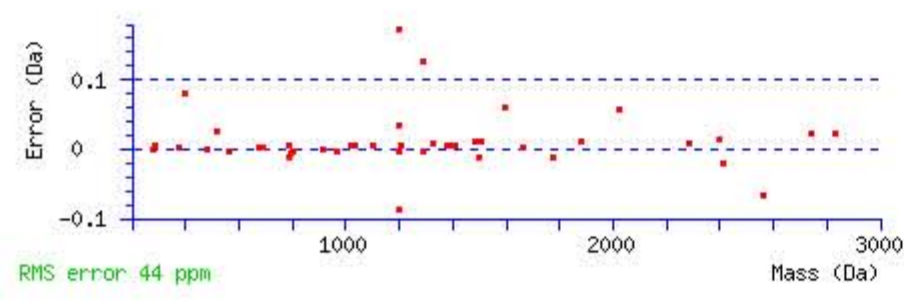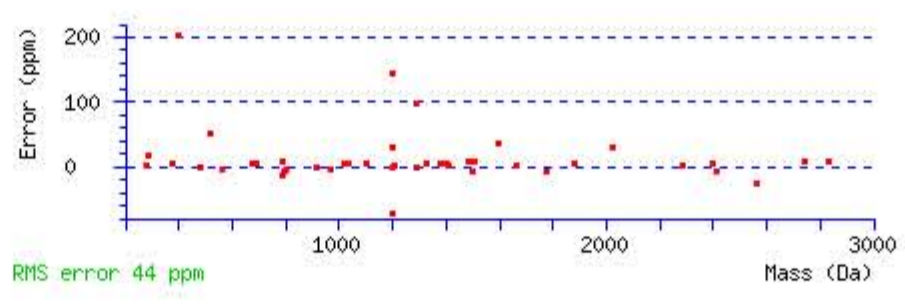

NCBI BLAST search of **CQCDELCSYYQSCCTDYTAECKPQVTR**  
 (Parameters: blastp, nr protein database, expect=20000, no filter, PAM30)  
 Other BLAST [web gateways](#)

### All matches to this query

| Score | Mr(calc):   | Delta    | Sequence                                    |
|-------|-------------|----------|---------------------------------------------|
| 86.0  | 3792.511536 | 0.002120 | <a href="#">CQCDELCSYYQSCCTDYTAECKPQVTR</a> |
| 20.5  | 3792.511536 | 0.002120 | <a href="#">CQCDELCSYYQSCCTDYTAECKPQVTR</a> |

# Mascot Search Results

## Peptide View

MS/MS Fragmentation of **GNPEQTPVLKPEEEAPAPEV GASKPEGIDSRPETLHPGRPQPPAEELCSGKPFDAFTDLK**  
 Found in **VTNC\_HUMAN**, Vitronectin OS=Homo sapiens GN=VTN PE=1 SV=1

Match to Query 69089: 6883.379552 from(861.429720,8+) rtinseconds(2104) index(32479)  
 Title: Locus:1.1.1.3396.16 File:"2013-07-02 CLN FXIII 180 min 3rd F 3.wiff"  
 Data file C:\Program Files (x86)\Matrix Science\Mascot Daemon\mgf9 FXIII 180 min 3rd\mascot\_daemon\_merge.mgf

Click mouse within plot area to zoom in by factor of two about that point

Or, Plot from  to  Da  Full range

Label all possible matches  Label matches used for scoring

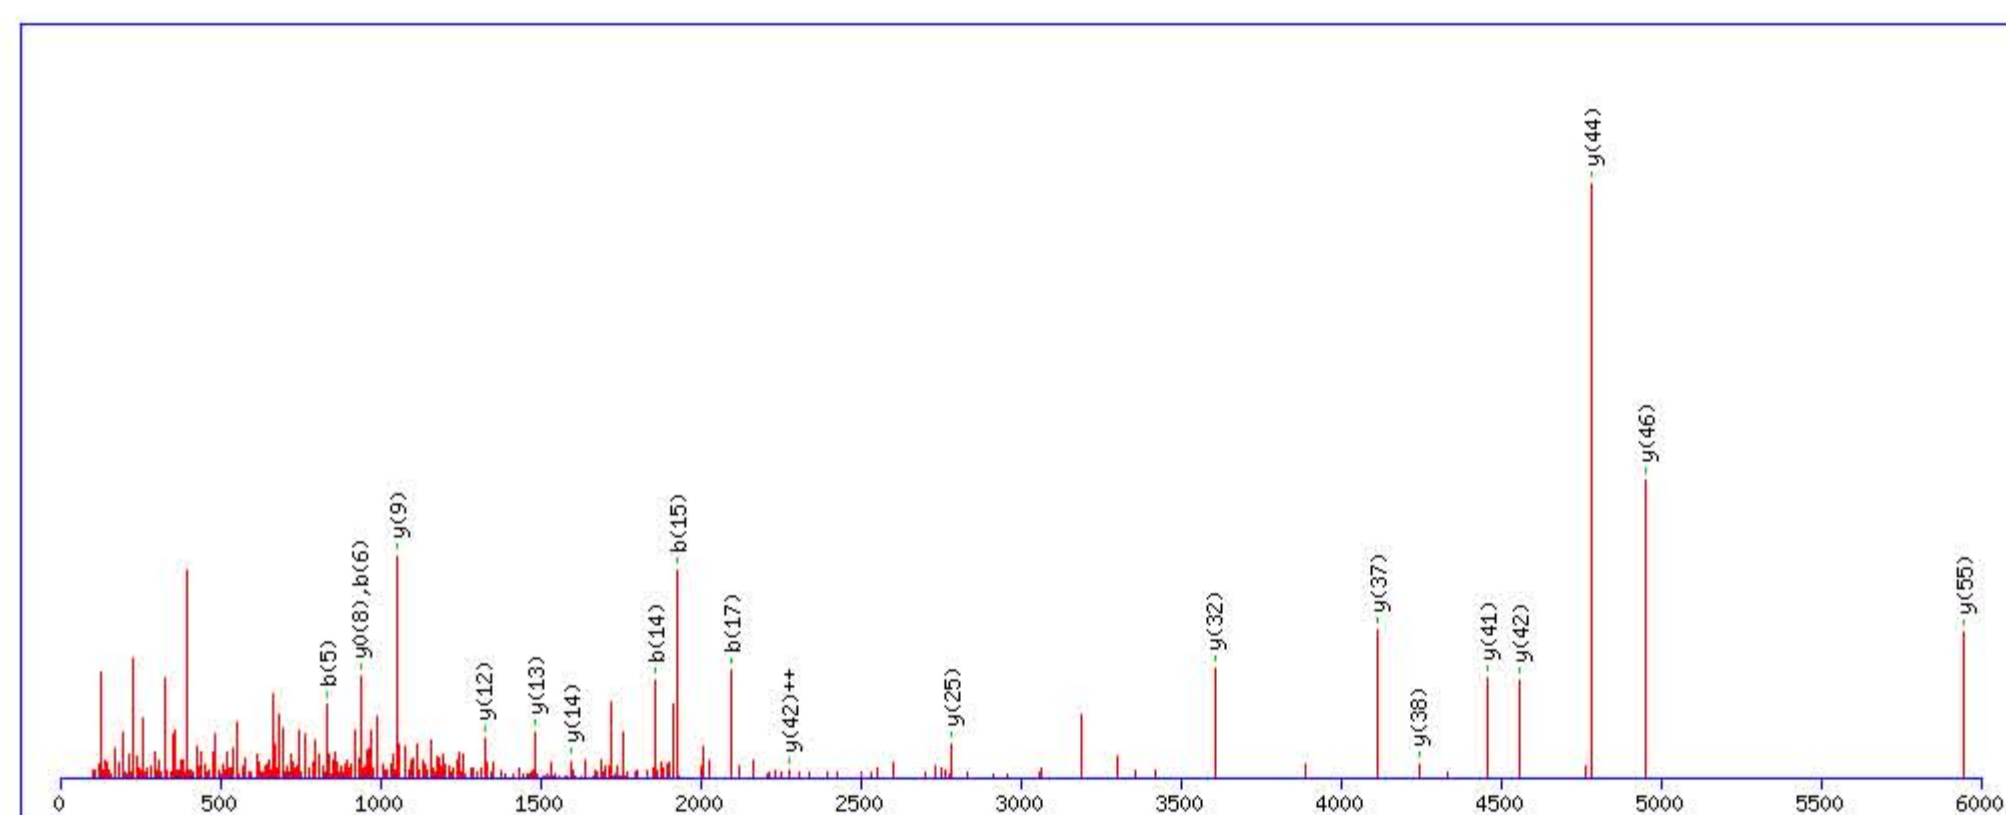

Monoisotopic mass of neutral peptide Mr(calc): 6883.374893  
 Fixed modifications: Carbamidomethyl (C) (apply to specified residues or termini only)  
 Variable modifications:  
 Q5 : Biotin:Thermo-21345 (Q)  
 Ions Score: 44 Expect: 0.00052  
 Matches : 20/708 fragment ions using 44 most intense peaks [\(help\)](#)

| #  | b                  | b <sup>++</sup> | b <sup>+</sup> | b <sup>+++</sup> | b <sup>0</sup> | b <sup>0++</sup> | Seq. | y                  | y <sup>++</sup>    | y <sup>+</sup> | y <sup>+++</sup> | y <sup>0</sup> | y <sup>0++</sup> | #  |
|----|--------------------|-----------------|----------------|------------------|----------------|------------------|------|--------------------|--------------------|----------------|------------------|----------------|------------------|----|
| 1  | 58.028740          | 29.518008       |                |                  |                |                  | G    |                    |                    |                |                  |                |                  | 61 |
| 2  | 172.071667         | 86.539471       | 155.045118     | 78.026197        |                |                  | N    | 6827.360757        | 3414.184017        | 6810.334208    | 3405.670742      | 6809.350192    | 3405.178734      | 60 |
| 3  | 269.124431         | 135.065854      | 252.097882     | 126.552579       |                |                  | P    | 6713.317830        | 3357.162553        | 6696.291281    | 3348.649279      | 6695.307265    | 3348.157271      | 59 |
| 4  | 398.167024         | 199.587150      | 381.140475     | 191.073876       | 380.156459     | 190.581868       | E    | 6616.265066        | 3308.636171        | 6599.238517    | 3300.122897      | 6598.254501    | 3299.630889      | 58 |
| 5  | <b>837.392350</b>  | 419.199813      | 820.365801     | 410.686539       | 819.381785     | 410.194531       | Q    | 6487.222473        | 3244.114875        | 6470.195924    | 3235.601600      | 6469.211908    | 3235.109592      | 57 |
| 6  | <b>938.440029</b>  | 469.723653      | 921.413480     | 461.210378       | 920.429464     | 460.718370       | T    | 6047.997147        | 3024.502212        | 6030.970598    | 3015.988937      | 6029.986582    | 3015.496929      | 56 |
| 7  | 1035.492793        | 518.250035      | 1018.466244    | 509.736760       | 1017.482228    | 509.244752       | P    | <b>5946.949468</b> | 2973.978372        | 5929.922919    | 2965.465098      | 5928.938903    | 2964.973090      | 55 |
| 8  | 1134.561207        | 567.784242      | 1117.534658    | 559.270967       | 1116.550642    | 558.778959       | V    | 5849.896704        | 2925.451990        | 5832.870155    | 2916.938716      | 5831.886139    | 2916.446708      | 54 |
| 9  | 1247.645271        | 624.326274      | 1230.618722    | 615.812999       | 1229.634706    | 615.320991       | L    | 5750.828290        | 2875.917783        | 5733.801741    | 2867.404509      | 5732.817725    | 2866.912501      | 53 |
| 10 | 1375.740234        | 688.373755      | 1358.713685    | 679.860481       | 1357.729669    | 679.368473       | K    | 5637.744226        | 2819.375751        | 5620.717677    | 2810.862477      | 5619.733661    | 2810.370469      | 52 |
| 11 | 1472.792998        | 736.900137      | 1455.766449    | 728.386863       | 1454.782433    | 727.894855       | P    | 5509.649263        | 2755.328270        | 5492.622714    | 2746.814995      | 5491.638698    | 2746.322987      | 51 |
| 12 | 1601.835591        | 801.421434      | 1584.809042    | 792.908159       | 1583.825026    | 792.416151       | E    | 5412.596499        | 2706.801888        | 5395.569950    | 2698.288613      | 5394.585934    | 2697.796605      | 50 |
| 13 | 1730.878184        | 865.942730      | 1713.851635    | 857.429456       | 1712.867619    | 856.937448       | E    | 5283.553906        | 2642.280591        | 5266.527357    | 2633.767317      | 5265.543341    | 2633.275309      | 49 |
| 14 | <b>1859.920777</b> | 930.464027      | 1842.894228    | 921.950752       | 1841.910212    | 921.458744       | E    | 5154.511313        | 2577.759295        | 5137.484764    | 2569.246020      | 5136.500748    | 2568.754012      | 48 |
| 15 | <b>1930.957891</b> | 965.982584      | 1913.931342    | 957.469309       | 1912.947326    | 956.977301       | A    | 5025.468720        | 2513.237998        | 5008.442171    | 2504.724724      | 5007.458155    | 2504.232716      | 47 |
| 16 | 2028.010655        | 1014.508966     | 2010.984106    | 1005.995691      | 2010.000090    | 1005.503683      | P    | <b>4954.431606</b> | 2477.719441        | 4937.405057    | 2469.206167      | 4936.421041    | 2468.714159      | 46 |
| 17 | <b>2099.047769</b> | 1050.027523     | 2082.021220    | 1041.514248      | 2081.037204    | 1041.022240      | A    | 4857.378842        | 2429.193059        | 4840.352293    | 2420.679785      | 4839.368277    | 2420.187777      | 45 |
| 18 | 2196.100533        | 1098.553905     | 2179.073984    | 1090.040630      | 2178.089968    | 1089.548622      | P    | <b>4786.341728</b> | 2393.674502        | 4769.315179    | 2385.161228      | 4768.331163    | 2384.669220      | 44 |
| 19 | 2325.143126        | 1163.075201     | 2308.116577    | 1154.561927      | 2307.132561    | 1154.069919      | E    | 4689.288964        | 2345.148120        | 4672.262415    | 2336.634846      | 4671.278399    | 2336.142838      | 43 |
| 20 | 2424.211540        | 1212.609408     | 2407.184991    | 1204.096134      | 2406.200975    | 1203.604126      | V    | <b>4560.246371</b> | <b>2280.626824</b> | 4543.219822    | 2272.113549      | 4542.235806    | 2271.621541      | 42 |
| 21 | 2481.233004        | 1241.120140     | 2464.206455    | 1232.606865      | 2463.222439    | 1232.114858      | G    | <b>4461.177957</b> | 2231.092617        | 4444.151408    | 2222.579342      | 4443.167392    | 2222.087334      | 41 |
| 22 | 2552.270118        | 1276.638697     | 2535.243569    | 1268.125423      | 2534.259553    | 1267.633415      | A    | 4404.156493        | 2202.581885        | 4387.129944    | 2194.068610      | 4386.145928    | 2193.576602      | 40 |
| 23 | 2639.302146        | 1320.154711     | 2622.275597    | 1311.641437      | 2621.291581    | 1311.149429      | S    | 4333.119379        | 2167.063328        | 4316.092830    | 2158.550053      | 4315.108814    | 2158.058045      | 39 |
| 24 | 2767.397109        | 1384.202193     | 2750.370560    | 1375.688918      | 2749.386544    | 1375.196910      | K    | <b>4246.087351</b> | 2123.547314        | 4229.060802    | 2115.034039      | 4228.076786    | 2114.542031      | 38 |
| 25 | 2864.449873        | 1432.728575     | 2847.423324    | 1424.215300      | 2846.439308    | 1423.723292      | P    | <b>4117.992388</b> | 2059.499832        | 4100.965839    | 2050.986558      | 4099.981823    | 2050.494550      | 37 |
| 26 | 2993.492466        | 1497.249871     | 2976.465917    | 1488.736597      | 2975.481901    | 1488.244589      | E    | 4020.939624        | 2010.973450        | 4003.913075    | 2002.460176      | 4002.929059    | 2001.968168      | 36 |
| 27 | 3050.513930        | 1525.760603     | 3033.487381    | 1517.247329      | 3032.503365    | 1516.755321      | G    | 3891.897031        | 1946.452154        | 3874.870482    | 1937.938879      | 3873.886466    | 1937.446871      | 35 |
| 28 | 3163.597994        | 1582.302635     | 3146.571445    | 1573.789361      | 3145.587429    | 1573.297353      | I    | 3834.875567        | 1917.941422        | 3817.849018    | 1909.428147      | 3816.865002    | 1908.936139      | 34 |
| 29 | 3278.624937        | 1639.816107     | 3261.598388    | 1631.302832      | 3260.614372    | 1630.810824      | D    | 3721.791503        | 1861.399390        | 3704.764954    | 1852.886115      | 3703.780938    | 1852.394107      | 33 |
| 30 | 3365.656965        | 1683.332121     | 3348.630416    | 1674.818846      | 3347.646400    | 1674.326838      | S    | <b>3606.764560</b> | 1803.885918        | 3589.738011    | 1795.372644      | 3588.753995    | 1794.880636      | 32 |
| 31 | 3521.758076        | 1761.382676     | 3504.731527    | 1752.869402      | 3503.747511    | 1752.377394      | R    | 3519.732532        | 1760.369904        | 3502.705983    | 1751.856630      | 3501.721967    | 1751.364622      | 31 |
| 32 | 3618.810840        | 1809.909058     | 3601.784291    | 1801.395784      | 3600.800275    | 1800.903776      | P    | 3363.631421        | 1682.319349        | 3346.604872    | 1673.806074      | 3345.620856    | 1673.314066      | 30 |
| 33 | 3747.853433        | 1874.430355     | 3730.826884    | 1865.917080      | 3729.842868    | 1865.425072      | E    | 3266.578657        | 1633.792967        | 3249.552108    | 1625.279692      | 3248.568092    | 1624.787684      | 29 |
| 34 | 3848.901112        | 1924.954194     | 3831.874563    | 1916.440920      | 3830.890547    | 1915.948912      | T    | 3137.536064        | 1569.271670        | 3120.509515    | 1560.758396      | 3119.525499    | 1560.266388      | 28 |
| 35 | 3961.985176        | 1981.496226     | 3944.958627    | 1972.982952      | 3943.974611    | 1972.490944      | L    | 3036.488385        | 1518.747831        | 3019.461836    | 1510.234556      | 3018.477820    | 1509.742548      | 27 |
| 36 | 4099.044088        | 2050.025682     | 4082.017539    | 2041.512408      | 4081.033523    | 2041.020400      | H    | 2923.404321        | 1462.205799        | 2906.377772    | 1453.692524      | 2905.393756    | 1453.200516      | 26 |
| 37 | 4196.096852        | 2098.552064     | 4179.070303    | 2090.038790      | 4178.086287    | 2089.546782      | P    | <b>2786.345409</b> | 1393.676343        | 2769.318860    | 1385.163068      | 2768.334844    | 1384.671060      | 25 |
| 38 | 4253.118316        | 2127.062796     | 4236.091767    | 2118.549522      | 4235.107751    | 2118.057514      | G    | 2689.292645        | 1345.149961        | 2672.266096    | 1336.636686      | 2671.282080    | 1336.144678      | 24 |
| 39 | 4409.219427        | 2205.113352     | 4392.192878    | 2196.600077      | 4391.208862    | 2196.108069      | R    | 2632.271181        | 1316.639229        | 2615.244632    | 1308.125954      | 2614.260616    | 1307.633946      | 23 |
| 40 | 4506.272191        | 2253.639734     | 4489.245642    | 2245.126459      | 4488.261626    | 2244.634451      | P    | 2476.170070        | 1238.588673        | 2459.143521    | 1230.075399      | 2458.159505    | 1229.583391      | 22 |
| 41 | 4634.330769        | 2317.669023     | 4617.304220    | 2309.155748      | 4616.320204    | 2308.663740      | Q    | 2379.117306        | 1190.062291        | 2362.090757    | 1181.549017      | 2361.106741    | 1181.057009      | 21 |
| 42 | 4731.383533        | 2366.195405     | 4714.356984    | 2357.682130      | 4713.372968    | 2357.190122      | P    | 2251.058728        | 1126.033002        | 2234.032179    | 1117.519728      | 2233.048163    | 1117.027720      | 20 |
| 43 | 4828.436297        | 2414.721787     | 4811.409748    | 2406.208512      | 4810.425732    | 2405.716504      | P    | 2154.005964        | 1077.506620        | 2136.979415    | 1068.993346      | 2135.995399    | 1068.501338      | 19 |
| 44 | 4899.473411        | 2450.240344     | 4882.446862    | 2441.727069      | 4881.462846    | 2441.235061      | A    | 2056.953200        | 1028.980238        | 2039.926651    | 1020.466964      | 2038.942635    | 1019.974956      | 18 |
| 45 | 5028.516004        | 2514.761640     | 5011.489455    | 2506.248366      | 5010.505439    | 2505.756358      | E    | 1985.916086        | 993.461681         | 1968.889537    | 984.948407       | 1967.905521    | 984.456399       | 17 |
| 46 | 5157.558597        | 2579.282937     | 5140.532048    | 2570.769662      | 5139.548032    | 2570.277654      | E    | 1856.873493        | 928.940385         | 1839.846944    | 920.427110       | 1838.862928    | 919.935102       | 16 |
| 47 | 5286.601190        | 2643.804233     | 5269.574641    | 2635.290959      | 5268.590625    | 2634.798951      | E    | 1727.830900        | 864.419088         | 1710.804351    | 855.905814       | 1709.820335    | 855.413806       | 15 |
| 48 | 5399.685254        | 2700.346265     | 5382.658705    | 2691.832991      | 5381.674689    | 2691.340983      | L    | <b>1598.788307</b> | 799.897792         | 1581.761758    | 791.384517       | 1580.777742    | 790.892509       | 14 |
| 49 | 5559.715903        | 2780.361590     | 5542.689354    | 2771.848315      | 5541.705338    | 2771.356307      | C    | <b>1485.704243</b> | 743.355760         | 1468.677694    | 734.842485       | 1467.693678    | 734.350477       | 13 |
| 50 | 5646.747931        | 2823.877604     | 5629.721382    | 2815.364329      | 5628.737366    | 2814.872321      | S    | <b>1325.673594</b> | 663.340435         | 1308.647045    | 654.827161       | 1307.663029    | 654.335153       | 12 |
| 51 | 5703.769395        | 2852.388336     | 5686.742846    | 2843.875061      | 5685.758830    | 2843.383053      | G    | 1238.641566        | 619.824421         | 1221.615017    | 611.311147       | 1220.631001    | 610.819139       | 11 |
| 52 | 5831.864358        | 2916.435817     | 5814.837809    | 2907.922543      | 5813.853793    | 2907.430535      | K    | 1181.620102        | 591.313689         | 1164.593553    | 582.800415       | 1163.609537    | 582.308407       | 10 |
| 53 | 5928.917122        | 2964.962199     | 5911.890573    | 2956.448925      | 5910.906557    | 2955.956917      | P    | <b>1053.525139</b> | 527.266208         | 1036.498590    | 518.752933       | 1035.514574    | 518.260925       | 9  |
| 54 | 6075.985536        | 3038.496406     | 6058.958987    | 3029.983132      | 6057.974971</  |                  |      |                    |                    |                |                  |                |                  |    |

# MASCOT SEARCH RESULTS

## Peptide View

MS/MS Fragmentation of **GGQIMTLK**

Found in **VWF\_HUMAN**, von Willebrand factor OS=Homo sapiens GN=VWF PE=1 SV=4

Match to Query 16446: 1157.625008 from(579.819780,2+) rtinseconds(1935) index(31358)

Title: Locus:1.1.1.3337.19 File:"2013-07-02 CLN FXIII 180 min 3rd F 3.wiff"

Data file C:\Program Files (x86)\Matrix Science\Mascot Daemon\mgf9 FXIII 180 min 3rd\mascot\_daemon\_merge.mgf

Click mouse within plot area to zoom in by factor of two about that point

Or, Plot from  to  Da

Label all possible matches  Label matches used for scoring

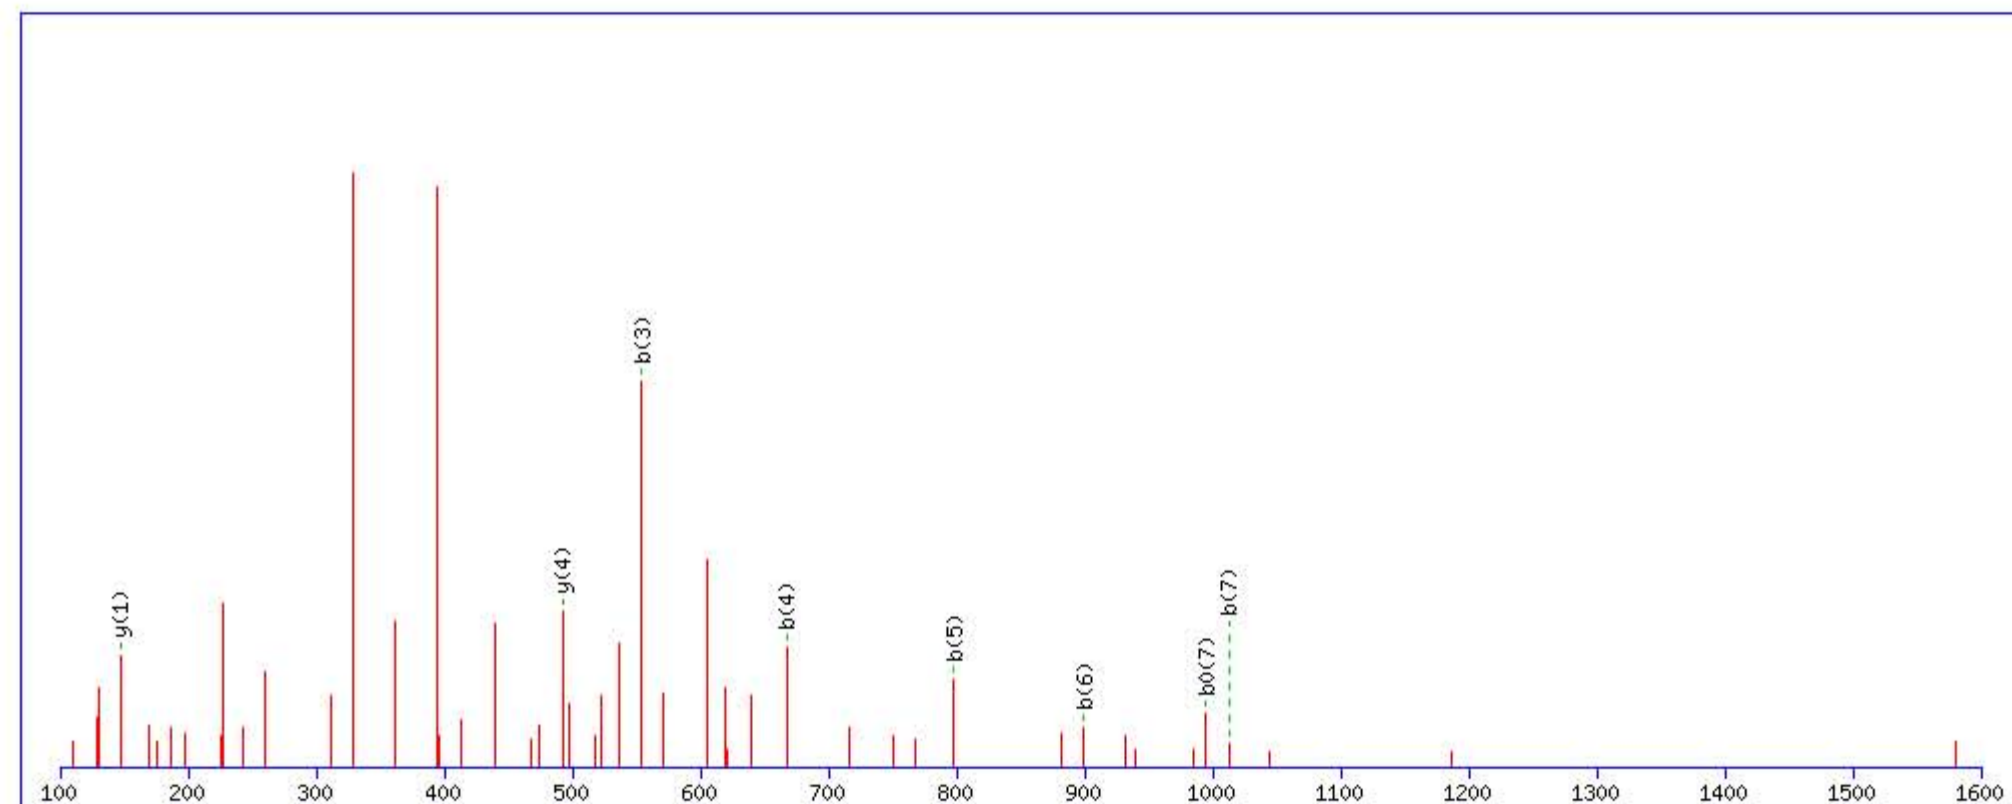

Monoisotopic mass of neutral peptide Mr(calc): 1157.630066

Fixed modifications: Carbamidomethyl (C) (apply to specified residues or termini only)

Variable modifications:

Q3 : Biotin:Thermo-21345 (Q)

Ions Score: 37 Expect: 0.0055

Matches : 8/66 fragment ions using 10 most intense peaks [\(help\)](#)

| # | b                  | b <sup>++</sup> | b <sup>*</sup> | b <sup>*++</sup> | b <sup>0</sup>    | b <sup>0++</sup> | Seq. | y                 | y <sup>++</sup> | y <sup>*</sup> | y <sup>*++</sup> | y <sup>0</sup> | y <sup>0++</sup> | # |
|---|--------------------|-----------------|----------------|------------------|-------------------|------------------|------|-------------------|-----------------|----------------|------------------|----------------|------------------|---|
| 1 | 58.028740          | 29.518008       |                |                  |                   |                  | G    |                   |                 |                |                  |                |                  | 8 |
| 2 | 115.050204         | 58.028740       |                |                  |                   |                  | G    | 1101.615886       | 551.311581      | 1084.589337    | 542.798307       | 1083.605321    | 542.306299       | 7 |
| 3 | <b>554.275530</b>  | 277.641403      | 537.248981     | 269.128129       |                   |                  | Q    | 1044.594422       | 522.800849      | 1027.567873    | 514.287575       | 1026.583857    | 513.795567       | 6 |
| 4 | <b>667.359594</b>  | 334.183435      | 650.333045     | 325.670161       |                   |                  | I    | 605.369096        | 303.188186      | 588.342547     | 294.674912       | 587.358531     | 294.182904       | 5 |
| 5 | <b>798.400079</b>  | 399.703678      | 781.373530     | 391.190403       |                   |                  | M    | <b>492.285032</b> | 246.646154      | 475.258483     | 238.132880       | 474.274467     | 237.640872       | 4 |
| 6 | <b>899.447758</b>  | 450.227517      | 882.421209     | 441.714243       | 881.437193        | 441.222235       | T    | 361.244547        | 181.125912      | 344.217998     | 172.612637       | 343.233982     | 172.120629       | 3 |
| 7 | <b>1012.531822</b> | 506.769549      | 995.505273     | 498.256275       | <b>994.521257</b> | 497.764267       | L    | 260.196868        | 130.602072      | 243.170319     | 122.088798       |                |                  | 2 |
| 8 |                    |                 |                |                  |                   |                  | K    | <b>147.112804</b> | 74.060040       | 130.086255     | 65.546765        |                |                  | 1 |

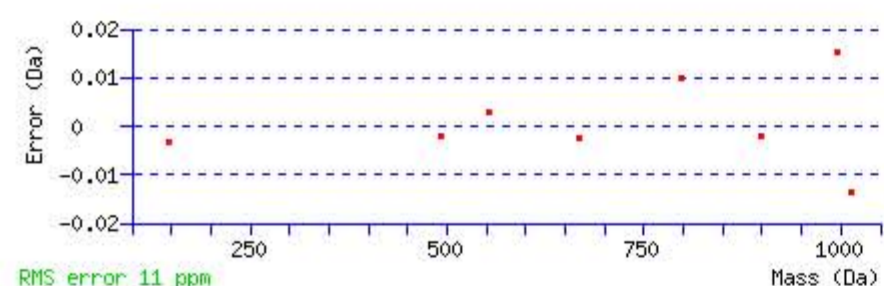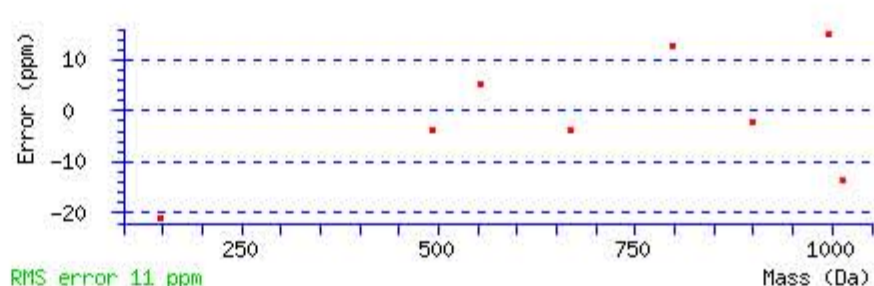

NCBI BLAST search of **GGQIMTLK**

(Parameters: blastp, nr protein database, expect=20000, no filter, PAM30)

Other BLAST [web gateways](#)

All matches to this query

| Score | Mr(calc):   | Delta     | Sequence                    |
|-------|-------------|-----------|-----------------------------|
| 37.2  | 1157.630066 | -0.005058 | <a href="#">GGQIMTLK</a>    |
| 17.3  | 1157.630051 | -0.005043 | <a href="#">QLSQMLK</a>     |
| 11.5  | 1157.640411 | -0.015403 | <a href="#">SPGKNSSIQLK</a> |
| 9.5   | 1157.636566 | -0.011558 | <a href="#">ILVEEMAPLK</a>  |
| 9.4   | 1157.619293 | 0.005715  | <a href="#">TNFEGPPRLK</a>  |
| 8.5   | 1157.640411 | -0.015403 | <a href="#">AQQLSSGNLK</a>  |
| 8.2   | 1157.629196 | -0.004188 | <a href="#">EPQITITQLK</a>  |
| 7.5   | 1157.622665 | 0.002343  | <a href="#">QRTDSLK</a>     |
| 7.4   | 1157.611420 | 0.013588  | <a href="#">MKLDVPEQAK</a>  |
| 6.6   | 1157.636566 | -0.011558 | <a href="#">LLAIMPDELK</a>  |



**Peptide View**

MS/MS Fragmentation of **ILTSDVFQDCNK**

Found in **VWF\_HUMAN**, von Willebrand factor OS=Homo sapiens GN=VWF PE=1 SV=4

Match to Query 16776: 1749.848862 from(584.290230,3+) rtinseconds(2167) index(47022)

Title: Locus:1.1.1.3467.9 File:"2013-07-02 CLN FXIII 180 min 3rd F 4.wiff"

Data file C:\Program Files (x86)\Matrix Science\Mascot Daemon\mgf9 FXIII 180 min 3rd\mascot\_daemon\_merge.mgf

Click mouse within plot area to zoom in by factor of two about that point

Or, Plot from  to  Da

Label all possible matches  Label matches used for scoring

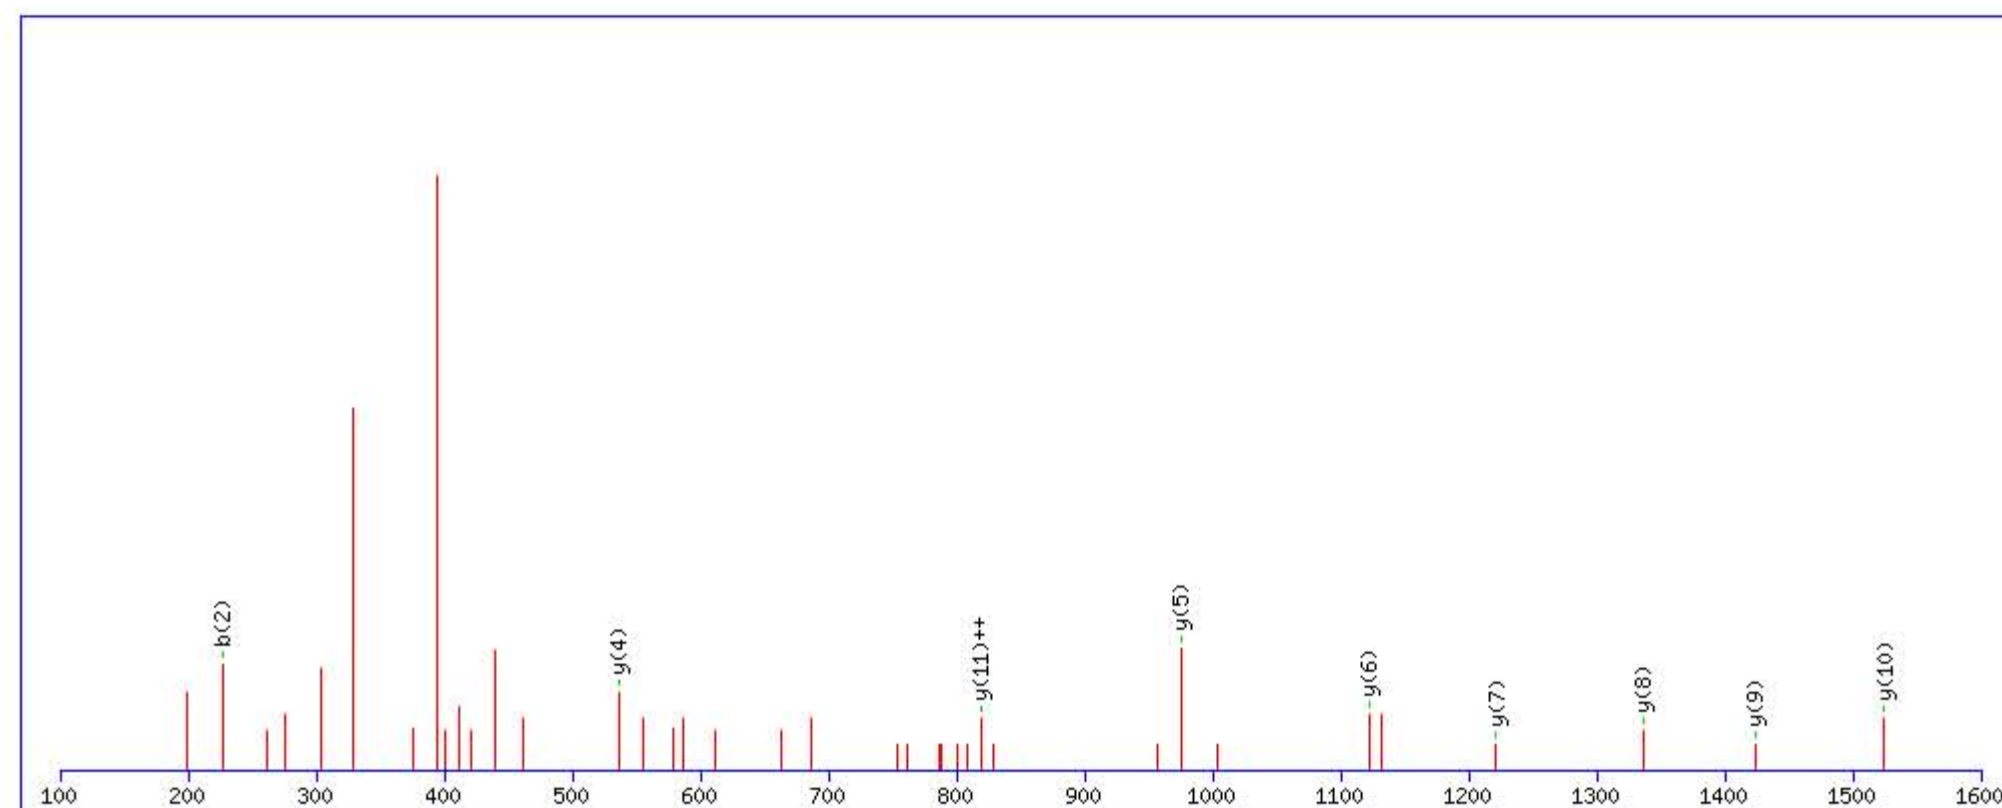

Monoisotopic mass of neutral peptide Mr(calc): 1749.842987

Fixed modifications: Carbamidomethyl (C) (apply to specified residues or termini only)

Variable modifications:

Q8 : Biotin:Thermo-21345 (Q)

Ions Score: 45 Expect: 0.0019

Matches : 9/108 fragment ions using 14 most intense peaks [\(help\)](#)

| #  | b                 | b <sup>++</sup> | b <sup>+</sup> | b <sup>*++</sup> | b <sup>0</sup> | b <sup>0++</sup> | Seq. | y                  | y <sup>++</sup>   | y <sup>+</sup> | y <sup>*++</sup> | y <sup>0</sup> | y <sup>0++</sup> | #  |
|----|-------------------|-----------------|----------------|------------------|----------------|------------------|------|--------------------|-------------------|----------------|------------------|----------------|------------------|----|
| 1  | 114.091340        | 57.549308       |                |                  |                |                  | I    |                    |                   |                |                  |                |                  | 12 |
| 2  | <b>227.175404</b> | 114.091340      |                |                  |                |                  | L    | 1637.766191        | <b>819.386734</b> | 1620.739642    | 810.873459       | 1619.755626    | 810.381451       | 11 |
| 3  | 328.223083        | 164.615179      |                |                  | 310.212518     | 155.609897       | T    | <b>1524.682127</b> | 762.844702        | 1507.655578    | 754.331427       | 1506.671562    | 753.839419       | 10 |
| 4  | 415.255111        | 208.131193      |                |                  | 397.244546     | 199.125911       | S    | <b>1423.634448</b> | 712.320862        | 1406.607899    | 703.807588       | 1405.623883    | 703.315580       | 9  |
| 5  | 530.282054        | 265.644665      |                |                  | 512.271489     | 256.639383       | D    | <b>1336.602420</b> | 668.804848        | 1319.575871    | 660.291574       | 1318.591855    | 659.799565       | 8  |
| 6  | 629.350468        | 315.178872      |                |                  | 611.339903     | 306.173589       | V    | <b>1221.575477</b> | 611.291377        | 1204.548928    | 602.778102       | 1203.564912    | 602.286094       | 7  |
| 7  | 776.418882        | 388.713079      |                |                  | 758.408317     | 379.707796       | F    | <b>1122.507063</b> | 561.757170        | 1105.480514    | 553.243895       | 1104.496498    | 552.751887       | 6  |
| 8  | 1215.644208       | 608.325742      | 1198.617659    | 599.812468       | 1197.633643    | 599.320459       | Q    | <b>975.438649</b>  | 488.222963        | 958.412100     | 479.709688       | 957.428084     | 479.217680       | 5  |
| 9  | 1330.671151       | 665.839214      | 1313.644602    | 657.325939       | 1312.660586    | 656.833931       | D    | <b>536.213323</b>  | 268.610300        | 519.186774     | 260.097025       | 518.202758     | 259.605017       | 4  |
| 10 | 1490.701800       | 745.854538      | 1473.675251    | 737.341264       | 1472.691235    | 736.849256       | C    | 421.186380         | 211.096828        | 404.159831     | 202.583553       |                |                  | 3  |
| 11 | 1604.744727       | 802.876002      | 1587.718178    | 794.362727       | 1586.734162    | 793.870719       | N    | 261.155731         | 131.081503        | 244.129182     | 122.568229       |                |                  | 2  |
| 12 |                   |                 |                |                  |                |                  | K    | 147.112804         | 74.060040         | 130.086255     | 65.546765        |                |                  | 1  |

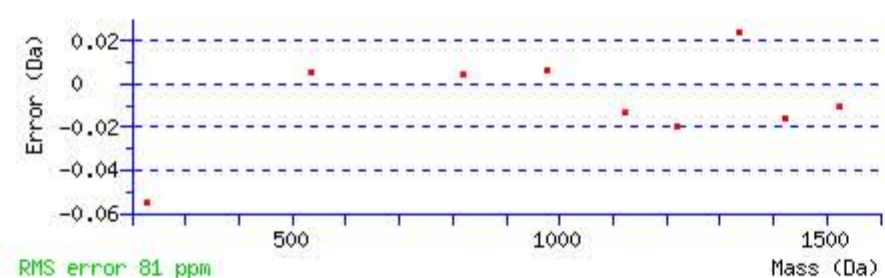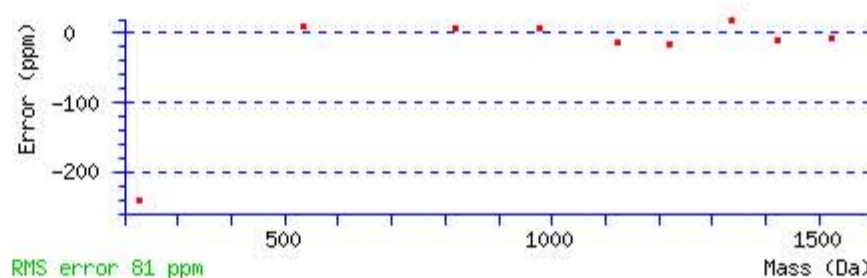

NCBI BLAST search of [ILTSDVFQDCNK](#)

(Parameters: blastp, nr protein database, expect=20000, no filter, PAM30)

Other BLAST [web gateways](#)

**All matches to this query**

| Score | Mr(calc):   | Delta    | Sequence                     |
|-------|-------------|----------|------------------------------|
| 44.6  | 1749.842987 | 0.005875 | <a href="#">ILTSDVFQDCNK</a> |

# MASCOT Search Results

## Peptide View

MS/MS Fragmentation of **VSSQCADTR**

Found in **VWF\_HUMAN**, von Willebrand factor OS=Homo sapiens GN=VWF PE=1 SV=4

Match to Query 20958: 1333.610088 from(667.812320,2+) rtinseconds(1300) index(27758)

Title: Locus:1.1.1.3115.9 File:"2013-07-02 CLN FXIII 180 min 3rd F 3.wiff"

Data file C:\Program Files (x86)\Matrix Science\Mascot Daemon\mgf\9 FXIII 180 min 3rd\mascot\_daemon\_merge.mgf

Click mouse within plot area to zoom in by factor of two about that point

Or, Plot from  to  Da

Label all possible matches  Label matches used for scoring

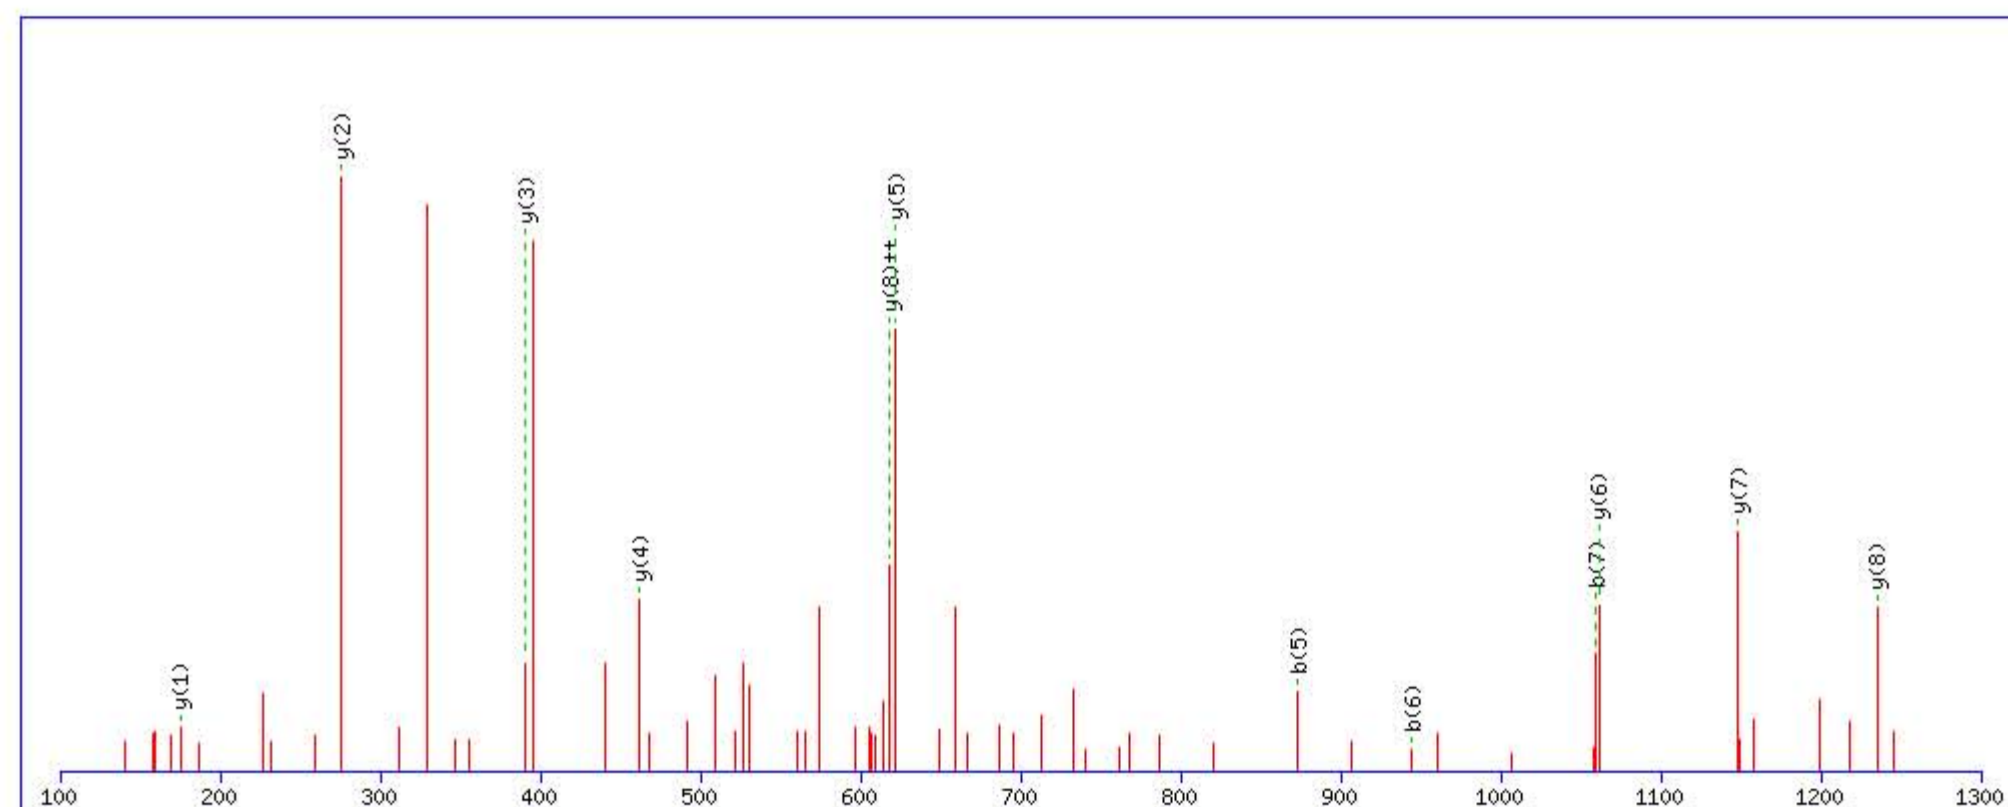

Monoisotopic mass of neutral peptide Mr(calc): 1333.611862

Fixed modifications: Carbamidomethyl (C) (apply to specified residues or termini only)

Variable modifications:

Q4 : Biotin:Thermo-21345 (Q)

Ions Score: 51 Expect: 1.6e-005

Matches : 12/86 fragment ions using 23 most intense peaks ([help](#))

| # | b           | b <sup>++</sup> | b <sup>*</sup> | b <sup>***</sup> | b <sup>0</sup> | b <sup>0++</sup> | Seq. | y           | y <sup>++</sup> | y <sup>*</sup> | y <sup>***</sup> | y <sup>0</sup> | y <sup>0++</sup> | # |
|---|-------------|-----------------|----------------|------------------|----------------|------------------|------|-------------|-----------------|----------------|------------------|----------------|------------------|---|
| 1 | 100.075690  | 50.541483       |                |                  |                |                  | V    |             |                 |                |                  |                |                  | 9 |
| 2 | 187.107718  | 94.057497       |                |                  | 169.097153     | 85.052214        | S    | 1235.550719 | 618.278998      | 1218.524170    | 609.765723       | 1217.540154    | 609.273715       | 8 |
| 3 | 274.139746  | 137.573511      |                |                  | 256.129181     | 128.568229       | S    | 1148.518691 | 574.762984      | 1131.492142    | 566.249709       | 1130.508126    | 565.757701       | 7 |
| 4 | 713.365072  | 357.186174      | 696.338523     | 348.672900       | 695.354507     | 348.180892       | Q    | 1061.486663 | 531.246970      | 1044.460114    | 522.733695       | 1043.476098    | 522.241687       | 6 |
| 5 | 873.395721  | 437.201499      | 856.369172     | 428.688224       | 855.385156     | 428.196216       | C    | 622.261337  | 311.634307      | 605.234788     | 303.121032       | 604.250772     | 302.629024       | 5 |
| 6 | 944.432835  | 472.720056      | 927.406286     | 464.206781       | 926.422270     | 463.714773       | A    | 462.230688  | 231.618982      | 445.204139     | 223.105707       | 444.220123     | 222.613700       | 4 |
| 7 | 1059.459778 | 530.233527      | 1042.433229    | 521.720253       | 1041.449213    | 521.228245       | D    | 391.193574  | 196.100425      | 374.167025     | 187.587151       | 373.183009     | 187.095143       | 3 |
| 8 | 1160.507457 | 580.757367      | 1143.480908    | 572.244092       | 1142.496892    | 571.752084       | T    | 276.166631  | 138.586953      | 259.140082     | 130.073679       | 258.156066     | 129.581671       | 2 |
| 9 |             |                 |                |                  |                |                  | R    | 175.118952  | 88.063114       | 158.092403     | 79.549839        |                |                  | 1 |

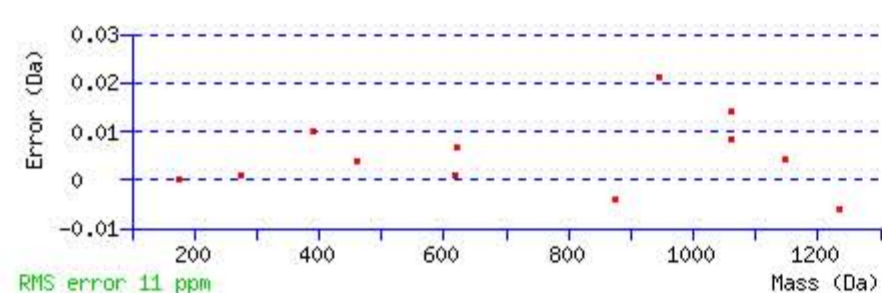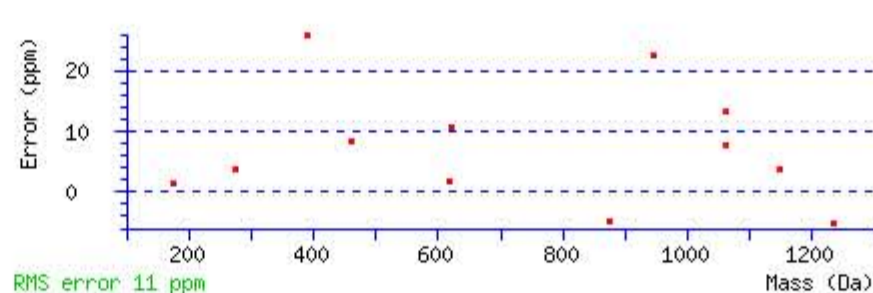

NCBI BLAST search of **VSSQCADTR**

(Parameters: blastp, nr protein database, expect=20000, no filter, PAM30)

Other BLAST [web gateways](#)

All matches to this query

| Score | Mr(calc):   | Delta     | Sequence                    |
|-------|-------------|-----------|-----------------------------|
| 51.4  | 1333.611862 | -0.001774 | <a href="#">VSSQCADTR</a>   |
| 0.3   | 1333.590729 | 0.019359  | <a href="#">CFSRAGSVYCK</a> |

Mascot: <http://www.matrixscience.com/>

# MASCOT SEARCH RESULTS

## Peptide View

MS/MS Fragmentation of **QHSDPCALNPR**

Found in **VWF\_HUMAN**, von Willebrand factor OS=Homo sapiens GN=VWF PE=1 SV=4

Match to Query 30690: 1604.748282 from(535.923370,3+) rtinseconds(1456) index(28522)

Title: Locus:1.1.1.3170.10 File:"2013-07-02 CLN FXIII 180 min 3rd F 3.wiff"

Data file C:\Program Files (x86)\Matrix Science\Mascot Daemon\mgf\9 FXIII 180 min 3rd\mascot\_daemon\_merge.mgf

Click mouse within plot area to zoom in by factor of two about that point

Or, Plot from  to  Da

Label all possible matches  Label matches used for scoring

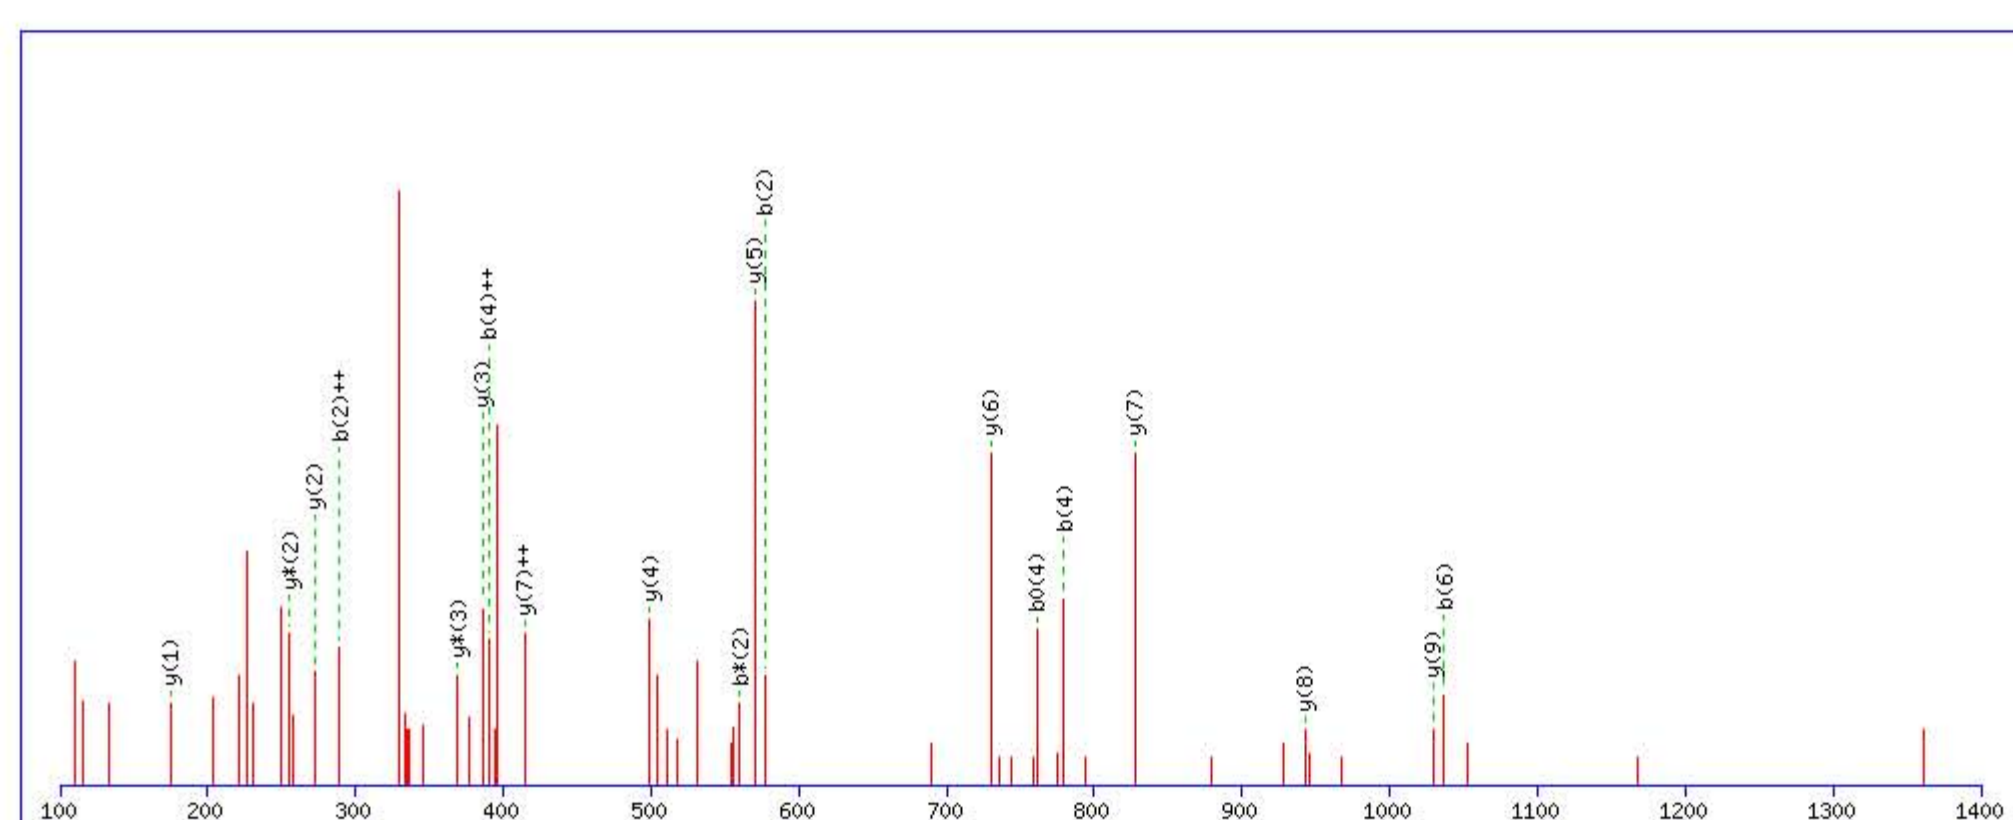

Monoisotopic mass of neutral peptide Mr(calc): 1604.755157

Fixed modifications: Carbamidomethyl (C) (apply to specified residues or termini only)

Variable modifications:

Q1 : Biotin:Thermo-21345 (Q)

Ions Score: 46 Expect: 0.00014

Matches : 19/102 fragment ions using 41 most intense peaks [\(help\)](#)

| #  | b                  | b <sup>++</sup>   | b <sup>*</sup>    | b <sup>*++</sup> | b <sup>0</sup>    | b <sup>0++</sup> | Seq. | y                  | y <sup>++</sup>   | y <sup>*</sup>    | y <sup>*++</sup> | y <sup>0</sup> | y <sup>0++</sup> | #  |
|----|--------------------|-------------------|-------------------|------------------|-------------------|------------------|------|--------------------|-------------------|-------------------|------------------|----------------|------------------|----|
| 1  | 440.232602         | 220.619939        | 423.206053        | 212.106664       |                   |                  | Q    |                    |                   |                   |                  |                |                  | 11 |
| 2  | <b>577.291514</b>  | <b>289.149395</b> | <b>560.264965</b> | 280.636121       |                   |                  | H    | 1166.537117        | 583.772196        | 1149.510568       | 575.258922       | 1148.526552    | 574.766914       | 10 |
| 3  | 664.323542         | 332.665409        | 647.296993        | 324.152134       | 646.312977        | 323.660126       | S    | <b>1029.478205</b> | 515.242740        | 1012.451656       | 506.729466       | 1011.467640    | 506.237458       | 9  |
| 4  | <b>779.350485</b>  | <b>390.178880</b> | 762.323936        | 381.665606       | <b>761.339920</b> | 381.173598       | D    | <b>942.446177</b>  | 471.726726        | 925.419628        | 463.213452       | 924.435612     | 462.721444       | 8  |
| 5  | 876.403249         | 438.705263        | 859.376700        | 430.191988       | 858.392684        | 429.699980       | P    | <b>827.419234</b>  | <b>414.213255</b> | 810.392685        | 405.699980       |                |                  | 7  |
| 6  | <b>1036.433898</b> | 518.720587        | 1019.407349       | 510.207313       | 1018.423333       | 509.715305       | C    | <b>730.366470</b>  | 365.686873        | 713.339921        | 357.173598       |                |                  | 6  |
| 7  | 1107.471012        | 554.239144        | 1090.444463       | 545.725870       | 1089.460447       | 545.233861       | A    | <b>570.335821</b>  | 285.671548        | 553.309272        | 277.158274       |                |                  | 5  |
| 8  | 1220.555076        | 610.781176        | 1203.528527       | 602.267901       | 1202.544511       | 601.775893       | L    | <b>499.298707</b>  | 250.152991        | 482.272158        | 241.639717       |                |                  | 4  |
| 9  | 1334.598003        | 667.802639        | 1317.571454       | 659.289365       | 1316.587438       | 658.797357       | N    | <b>386.214643</b>  | 193.610959        | <b>369.188094</b> | 185.097685       |                |                  | 3  |
| 10 | 1431.650767        | 716.329021        | 1414.624218       | 707.815747       | 1413.640202       | 707.323739       | P    | <b>272.171716</b>  | 136.589496        | <b>255.145167</b> | 128.076221       |                |                  | 2  |
| 11 |                    |                   |                   |                  |                   |                  | R    | <b>175.118952</b>  | 88.063114         | 158.092403        | 79.549839        |                |                  | 1  |

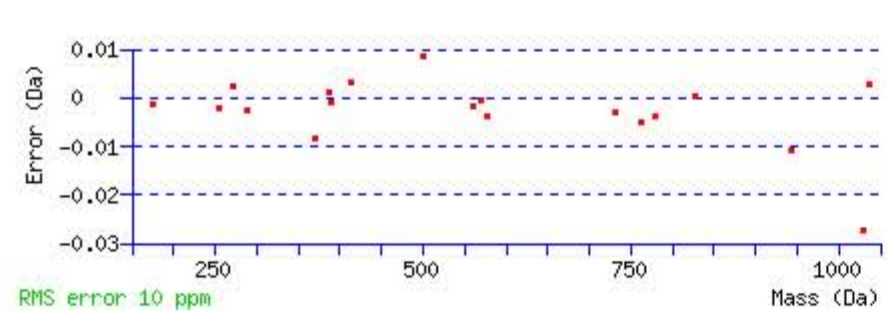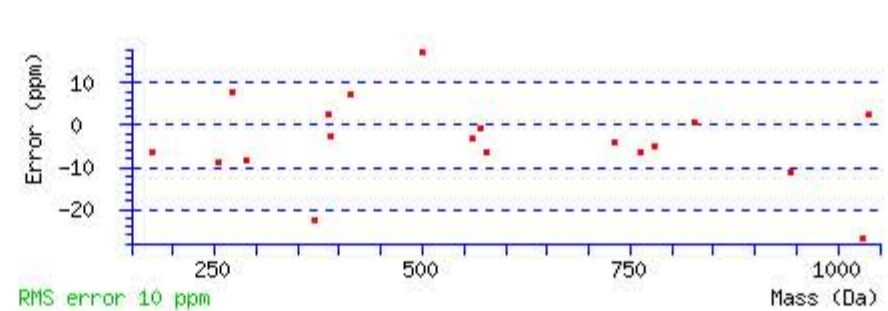

NCBI BLAST search of **QHSDPCALNPR**

(Parameters: blastp, nr protein database, expect=20000, no filter, PAM30)

Other BLAST [web gateways](#)

### All matches to this query

| Score | Mr(calc):   | Delta     | Sequence                          |
|-------|-------------|-----------|-----------------------------------|
| 46.2  | 1604.755157 | -0.006875 | <a href="#">QHSDPCALNPR</a>       |
| 4.9   | 1604.747726 | 0.000556  | <a href="#">IHNEERSYKCNR</a>      |
| 0.7   | 1604.754288 | -0.006006 | <a href="#">GPSPASSSSSSPPAHPR</a> |
| 0.4   | 1604.732529 | 0.015753  | <a href="#">GDVGDRGDKQQGMAR</a>   |

# MASCOT SEARCH RESULTS

## Peptide View

MS/MS Fragmentation of **ILDELLQTCVDPEDCPVCEVAGR**  
 Found in **VWF\_HUMAN**, von Willebrand factor OS=Homo sapiens GN=VWF PE=1 SV=4

Match to Query 53976: 2998.395192 from(1000.472340,3+) rtinseconds(2623) index(35388)  
 Title: Locus:1.1.1.3576.25 File:"2013-07-02 CLN FXIII 180 min 3rd F 3.wiff"  
 Data file C:\Program Files (x86)\Matrix Science\Mascot Daemon\mgf\9 FXIII 180 min 3rd\mascot\_daemon\_merge.mgf

Click mouse within plot area to zoom in by factor of two about that point  
 Or, Plot from  to  Da   
 Label all possible matches  Label matches used for scoring

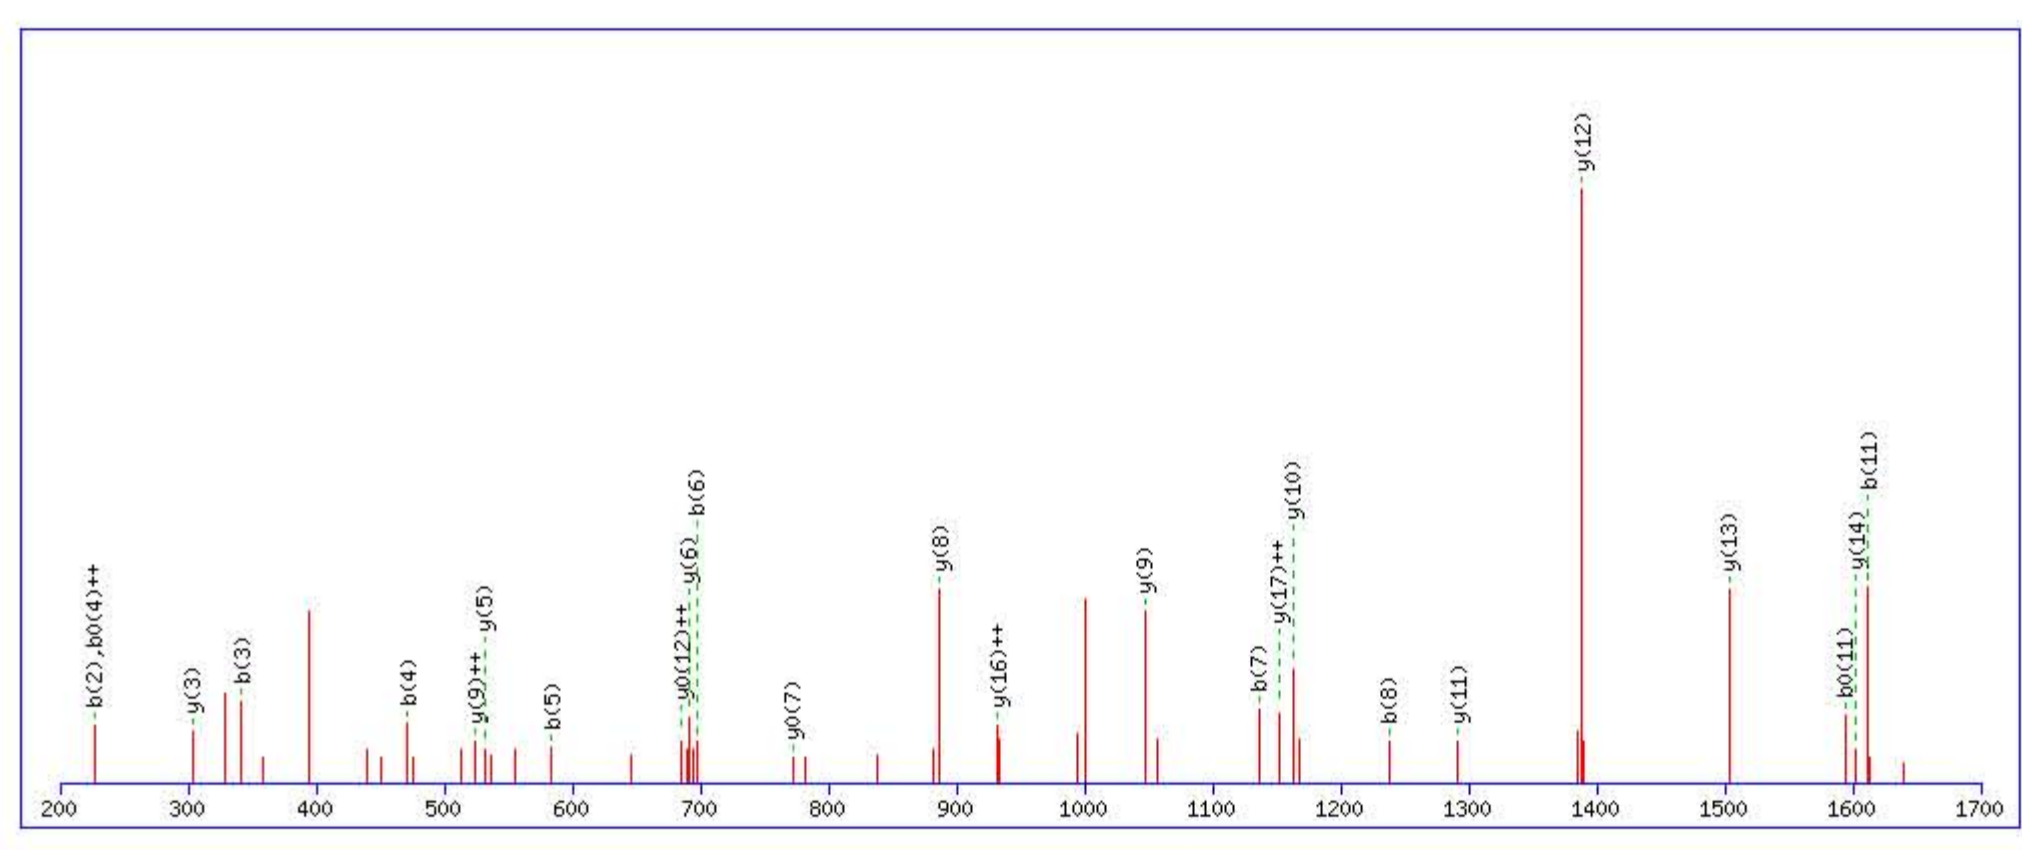

Monoisotopic mass of neutral peptide Mr(calc): 2998.390854  
 Fixed modifications: Carbamidomethyl (C) (apply to specified residues or termini only)  
 Variable modifications: Q7 : Biotin:Thermo-21345 (Q)  
 Ions Score: 80 Expect: 4.3e-008  
 Matches : 25/240 fragment ions using 37 most intense peaks [\(help\)](#)

| #  | b                  | b <sup>++</sup> | b <sup>*</sup> | b <sup>*++</sup> | b <sup>0</sup>     | b <sup>0++</sup>  | Seq. | y                  | y <sup>++</sup>    | y <sup>*</sup> | y <sup>*++</sup> | y <sup>0</sup>    | y <sup>0++</sup>  | #  |
|----|--------------------|-----------------|----------------|------------------|--------------------|-------------------|------|--------------------|--------------------|----------------|------------------|-------------------|-------------------|----|
| 1  | 114.091340         | 57.549308       |                |                  |                    |                   | I    |                    |                    |                |                  |                   |                   | 23 |
| 2  | <b>227.175404</b>  | 114.091340      |                |                  |                    |                   | L    | 2886.314052        | 1443.660664        | 2869.287503    | 1435.147389      | 2868.303487       | 1434.655381       | 22 |
| 3  | <b>342.202347</b>  | 171.604811      |                |                  | 324.191782         | 162.599529        | D    | 2773.229988        | 1387.118632        | 2756.203439    | 1378.605357      | 2755.219423       | 1378.113349       | 21 |
| 4  | <b>471.244940</b>  | 236.126108      |                |                  | 453.234375         | <b>227.120826</b> | E    | 2658.203045        | 1329.605160        | 2641.176496    | 1321.091886      | 2640.192480       | 1320.599878       | 20 |
| 5  | <b>584.329004</b>  | 292.668140      |                |                  | 566.318439         | 283.662858        | L    | 2529.160452        | 1265.083864        | 2512.133903    | 1256.570589      | 2511.149887       | 1256.078581       | 19 |
| 6  | <b>697.413068</b>  | 349.210172      |                |                  | 679.402503         | 340.204890        | L    | 2416.076388        | 1208.541832        | 2399.049839    | 1200.028557      | 2398.065823       | 1199.536549       | 18 |
| 7  | <b>1136.638394</b> | 568.822835      | 1119.611845    | 560.309561       | 1118.627829        | 559.817553        | Q    | 2302.992324        | <b>1151.999800</b> | 2285.965775    | 1143.486525      | 2284.981759       | 1142.994517       | 17 |
| 8  | <b>1237.686073</b> | 619.346675      | 1220.659524    | 610.833400       | 1219.675508        | 610.341392        | T    | 1863.766998        | <b>932.387137</b>  | 1846.740449    | 923.873863       | 1845.756433       | 923.381855        | 16 |
| 9  | 1397.716722        | 699.361999      | 1380.690173    | 690.848725       | 1379.706157        | 690.356717        | C    | 1762.719319        | 881.863298         | 1745.692770    | 873.350023       | 1744.708754       | 872.858015        | 15 |
| 10 | 1496.785136        | 748.896206      | 1479.758587    | 740.382932       | 1478.774571        | 739.890924        | V    | <b>1602.688670</b> | 801.847973         | 1585.662121    | 793.334699       | 1584.678105       | 792.842691        | 14 |
| 11 | <b>1611.812079</b> | 806.409678      | 1594.785530    | 797.896403       | <b>1593.801514</b> | 797.404395        | D    | <b>1503.620256</b> | 752.313766         | 1486.593707    | 743.800492       | 1485.609691       | 743.308483        | 13 |
| 12 | 1708.864843        | 854.936060      | 1691.838294    | 846.422785       | 1690.854278        | 845.930777        | P    | <b>1388.593313</b> | 694.800294         | 1371.566764    | 686.287020       | 1370.582748       | <b>685.795012</b> | 12 |
| 13 | 1837.907436        | 919.457356      | 1820.880887    | 910.944082       | 1819.896871        | 910.452074        | E    | <b>1291.540549</b> | 646.273912         | 1274.514000    | 637.760638       | 1273.529984       | 637.268630        | 11 |
| 14 | 1952.934379        | 976.970828      | 1935.907830    | 968.457553       | 1934.923814        | 967.965545        | D    | <b>1162.497956</b> | 581.752616         | 1145.471407    | 573.239342       | 1144.487391       | 572.747333        | 10 |
| 15 | 2112.965028        | 1056.986152     | 2095.938479    | 1048.472877      | 2094.954463        | 1047.980869       | C    | <b>1047.471013</b> | <b>524.239144</b>  | 1030.444464    | 515.725870       | 1029.460448       | 515.233862        | 9  |
| 16 | 2210.017792        | 1105.512534     | 2192.991243    | 1096.999259      | 2192.007227        | 1096.507251       | P    | <b>887.440364</b>  | 444.223820         | 870.413815     | 435.710545       | 869.429799        | 435.218537        | 8  |
| 17 | 2309.086206        | 1155.046741     | 2292.059657    | 1146.533466      | 2291.075641        | 1146.041458       | V    | 790.387600         | 395.697438         | 773.361051     | 387.184163       | <b>772.377035</b> | 386.692155        | 7  |
| 18 | 2469.116855        | 1235.062065     | 2452.090306    | 1226.548791      | 2451.106290        | 1226.056783       | C    | <b>691.319186</b>  | 346.163231         | 674.292637     | 337.649956       | 673.308621        | 337.157948        | 6  |
| 19 | 2598.159448        | 1299.583362     | 2581.132899    | 1291.070087      | 2580.148883        | 1290.578079       | E    | <b>531.288537</b>  | 266.147907         | 514.261988     | 257.634632       | 513.277972        | 257.142624        | 5  |
| 20 | 2697.227862        | 1349.117569     | 2680.201313    | 1340.604294      | 2679.217297        | 1340.112286       | V    | 402.245944         | 201.626610         | 385.219395     | 193.113335       |                   |                   | 4  |
| 21 | 2768.264976        | 1384.636126     | 2751.238427    | 1376.122851      | 2750.254411        | 1375.630843       | A    | <b>303.177530</b>  | 152.092403         | 286.150981     | 143.579129       |                   |                   | 3  |
| 22 | 2825.286440        | 1413.146858     | 2808.259891    | 1404.633583      | 2807.275875        | 1404.141575       | G    | 232.140416         | 116.573846         | 215.113867     | 108.060571       |                   |                   | 2  |
| 23 |                    |                 |                |                  |                    |                   | R    | 175.118952         | 88.063114          | 158.092403     | 79.549839        |                   |                   | 1  |

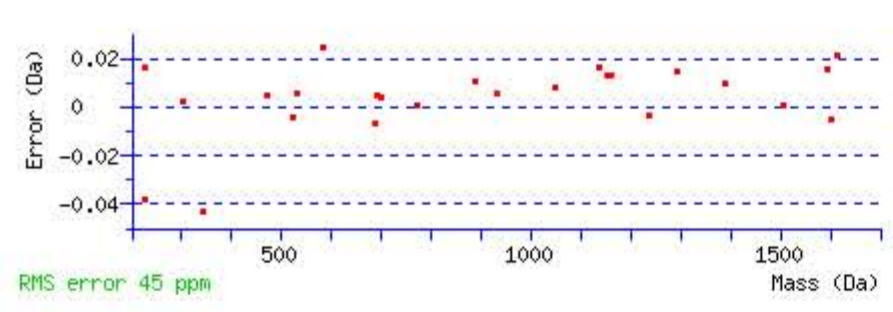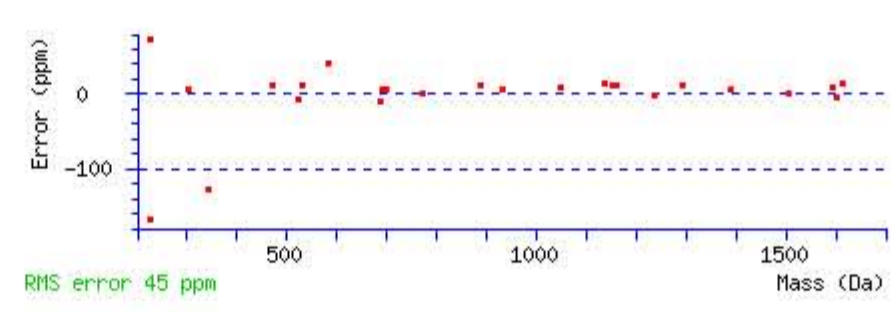

NCBI BLAST search of **ILDELLQTCVDPEDCPVCEVAGR**  
 (Parameters: blastp, nr protein database, expect=20000, no filter, PAM30)  
 Other BLAST [web gateways](#)

### All matches to this query

| Score | Mr(calc):   | Delta     | Sequence                                |
|-------|-------------|-----------|-----------------------------------------|
| 80.1  | 2998.390854 | 0.004338  | <a href="#">ILDELLQTCVDPEDCPVCEVAGR</a> |
| 1.5   | 2998.398026 | -0.002834 | <a href="#">VFQTYDPEDNGFIPDSLLEDVMK</a> |
